# Supplementary material for: P2RX7 regulates tauopathy progression via tau and mitochondria loading in extracellular vesicles
Source: Research Square preprint supplement (doi:10.21203/rs.3.rs-6771517/v1), 2025-06-23
Supplement: Supplementary file 1 [file 15b289822ce078fd13f8f671.xlsx]

## Sheet: DE-0_Astrocyte
logFC	AveExpr	p_val_adj	gene_names
-1.264	7.408	1.156e-06	Agmo
-1.641	4.787	1.156e-06	4833420G17Rik
-2.439	3.556	1.156e-06	6430590A07Rik
1.945	4.698	1.377e-06	Zfp729a
-1.493	4.091	4.902e-06	Cmya5
5.786	-0.09445	5.15e-06	Gm6166
-0.9511	6.986	8.986e-06	Ide
-0.8862	6.516	8.986e-06	Aldh7a1
-0.9282	8.489	1.175e-05	Eif4g3
-4.918	0.4236	1.415e-05	Cldn34c1
-2.378	3.188	1.592e-05	Col1a2
1.131	6.159	1.679e-05	Tmem51
-5.485	-0.3778	1.939e-05	C130046K22Rik
-1.135	8.069	2.343e-05	Rcan2
1.57	3.728	2.343e-05	B230206L02Rik
-1.861	2.558	2.903e-05	1700086O06Rik
1.346	5.36	2.903e-05	Brinp2
-1.171	4.056	2.956e-05	Ccdc28b
-5.246	-1.462	3.384e-05	Gm47860
3.846	-0.7301	3.454e-05	Gm14584
1.476	3.77	3.542e-05	Gm47469
1.011	7.775	3.843e-05	Ptchd4
5.114	-0.4138	4.216e-05	Cacng6
-1.844	3.332	4.216e-05	Unc80
0.8423	6.484	4.216e-05	Rhobtb3
4.107	-1.316	6.297e-05	Tmprss13
-0.688	6.407	7.194e-05	Btaf1
4.908	-0.9185	8.758e-05	Gm9259
-1.547	3.326	8.865e-05	Ddr2
-1.454	5.01	8.865e-05	A930015D03Rik
-0.9302	5.947	8.865e-05	mt-Nd5
1.605	2.973	8.897e-05	Gm43439
1.512	4.173	9.029e-05	Cox7b2
-0.7588	6.904	9.109e-05	mt-Cytb
4.571	-0.5372	9.109e-05	Gm3143
4.394	-1.185	9.502e-05	Gm6645
4.904	-0.5757	9.53e-05	Gm6445
-0.8539	5.585	0.0001094	mt-Nd2
-1.17	3.878	0.0001257	Gramd1c
1.079	5.078	0.0001436	Fhod3
-1.922	2.305	0.0001495	Sox11
-1.092	4.151	0.0001522	Tatdn3
-0.8908	9.658	0.0001552	Rgs7
3.759	-1.122	0.0001552	Or4e2
-0.785	11.89	0.0001572	mt-Rnr1
1.138	4.55	0.0001572	Gm49342
-0.7427	5.293	0.0001572	mt-Nd4
-3.706	5.798	0.0001666	Fam163a
1.469	2.981	0.0001666	Gm42196
3.889	-1.411	0.0001881	Gm38019
0.5229	8.475	0.0002412	Xpr1
-2.478	1.991	0.0002429	4933427I22Rik
0.7477	5.392	0.0002493	F730043M19Rik
-2.474	8.816	0.0002552	Pde10a
0.8327	5.914	0.0002901	Hgf
-1.772	2.238	0.0002901	Copz2
-1.277	5.561	0.0002901	Nsdhl
1.458	4.01	0.0003016	4930447K03Rik
-0.633	9.818	0.0003016	Dclk1
-0.7617	4.966	0.0003051	Inf2
0.8338	5.813	0.0003474	Pkia
0.8672	5.304	0.0003635	Nopchap1
-2.063	3.068	0.0003683	Ulk4
1.195	4.701	0.000374	Gm1604a
0.8117	6.828	0.0004186	Gabrg3
-4.384	-1.053	0.0004186	Gm12532
4.138	-1.003	0.0004234	Gm30613
1.353	4.412	0.0004314	Creb5
-0.6293	5.57	0.0004314	Gm31907
0.8082	6.035	0.0004597	Gm20646
-2.08	1.294	0.0004597	Atoh8
-0.7016	6.691	0.00047	mt-Co1
1.01	7.916	0.00047	Grip1
-1.935	2.043	0.0004758	Extl1
-0.7024	7.297	0.0004758	Tra2a
-1.526	3.322	0.0004758	Gm30075
0.8813	4.076	0.0004882	Mmd
1.019	4.086	0.0005225	D630045J12Rik
3.234	-0.7054	0.0005391	Wnt4
-0.7533	4.684	0.0005883	Rap1gap
-0.5831	6.853	0.0006045	Npc1
-1.76	2.979	0.0006045	Ccnb1ip1
-1.286	5.285	0.0006123	Eya4
-0.9677	3.327	0.0006152	Gm26782
3.292	-0.7676	0.0006182	Gm43488
-0.7097	12.27	0.0006182	mt-Rnr2
-0.8336	5.259	0.0006182	Tesk2
1.654	4.493	0.0006339	Gm45455
-0.946	8.183	0.0006417	Hdac4
0.6066	7.346	0.0006533	Sugct
-0.7576	5.769	0.0007114	Gm21954
0.9121	3.659	0.0007114	Adamts3
0.4506	8.818	0.000738	Astn1
0.9121	5.84	0.000738	Lhfpl2
-1.158	3.617	0.0007523	Gem
-0.5698	6.134	0.0007559	Cyb5b
0.7746	6.177	0.0007559	Ppp1r21
1.769	2.381	0.0007559	Gm47071
-0.8484	5.487	0.0007757	mt-Nd1
-1.874	6.09	0.0007868	Cacna1d
-1.043	4.048	0.0007868	Pdgfrl
1.325	3.087	0.0008525	Piezo1
3.382	0.9024	0.000856	Cfap77
1.8	3.138	0.000901	Slco3a1
-0.9946	5.67	0.0009388	Agbl4
-0.5693	7.873	0.0009388	Hlf
-0.7389	5.086	0.0009802	Tmem100
5.816	-0.4562	0.0009882	Gm29231
-0.5957	6.884	0.0009895	Kctd1
0.7189	5.219	0.001009	Nox1
-2.149	0.6902	0.00101	Dcdc2b
3.519	0.0366	0.001022	Atp6ap1l
3.78	-0.7968	0.001022	Cd36
0.7255	7.044	0.001027	Adra1a
-2.236	1.421	0.001027	Bambi
-1.646	4.17	0.001037	Noct
-1.492	1.864	0.001037	Gm34408
1.675	2.32	0.001216	Rab3b
0.4767	5.94	0.001288	Mmp14
1.076	4.243	0.001288	Sema5b
-0.6229	5.557	0.001288	Crem
2.472	1.914	0.00129	Ntng1
-0.5589	6.811	0.00136	Wdpcp
0.4691	8.822	0.001386	Wwox
2.053	1.201	0.001407	Acot12
1.135	3.047	0.001407	Rarres2
-0.6905	5.681	0.001424	Pot1b
-1.776	1.327	0.001464	Gfra2
0.5449	5.922	0.001499	4930544I03Rik
0.7077	5.71	0.00156	Plxna2
-0.5213	5.92	0.001616	Zfhx2
-0.6918	9.194	0.001616	Pde7b
1.554	2.844	0.001726	F830045P16Rik
-4.018	-0.08739	0.001728	Gpnmb
0.5127	8.013	0.001728	Chst11
-1.409	4.659	0.001728	Coq10b
-0.4723	9.001	0.001728	Map2
-0.643	6.6	0.001818	Stxbp6
0.5279	6.358	0.001818	Snx12
-0.6401	4.636	0.001857	Zfp157
-0.491	6.904	0.001943	Pcsk6
-1.054	7.661	0.001961	Rgma
1.75	0.8808	0.002102	Upk3bl
3.037	-0.2089	0.002102	Gm26531
-1.394	1.789	0.002102	ENSMUSG00000121191
-0.5031	5.71	0.002182	Lman1
-0.766	3.809	0.002196	Spef2
0.8531	4.317	0.002199	Cd9
0.5573	4.973	0.002338	Ccdc82
-2.011	1.752	0.002338	Dapk2
0.6406	9.339	0.002338	Sema6d
-0.591	7.32	0.002341	Hspa8
2.411	-0.4366	0.002353	Pnp2
3.702	0.2542	0.002353	Gm16251
-2.209	0.9647	0.00246	Gm10037
-3.458	5.287	0.002504	Egfem1
-0.9876	3.305	0.002539	Gm49380
-0.7161	5.25	0.002608	Nsmf
0.6964	5.22	0.002726	Larp1b
-1.38	1.432	0.002733	Nbl1
3.057	2.67	0.002789	Trpc3
-1.082	2.839	0.002789	Nudt6
-0.5966	6.386	0.00285	Septin8
0.7096	3.603	0.002916	Rccd1
-0.534	5.679	0.002922	Ppp1r3c
0.615	5.985	0.002922	Gm5820
1.65	3.683	0.002922	Adamts1
1.102	4.706	0.002955	Dgkh
0.6646	4.926	0.002955	Bzw2
-0.5505	5.254	0.002955	Slc38a6
0.9859	3.881	0.002976	Pcdhgb7
1.431	1.621	0.002976	Gm45341
-0.7556	8.326	0.002976	Unc13c
-1.332	3.881	0.002995	Prkcd
-0.7676	3.559	0.002995	Tmem218
-2.582	0.02813	0.002995	Gm7644
0.6105	5.226	0.002995	Man2a2
0.4319	7.177	0.002999	Slc24a3
-2.571	-0.3033	0.002999	Bves
0.8098	3.492	0.003004	Smyd2
-0.9068	3.364	0.003007	Odad1
0.6223	6.373	0.003018	Plxna4
0.6214	4.927	0.003167	Mblac2
-0.8533	5.165	0.003254	Smoc1
-2.615	0.2538	0.003254	Gm43647
-0.4767	5.857	0.003343	Dusp11
2.181	1.574	0.003353	Iqgap2
0.5788	5.112	0.003353	Ap5m1
-1.083	3.685	0.003415	Slc25a47
0.5543	7.128	0.003509	Nme7
-0.4797	6.124	0.003509	Lrrc49
-0.9317	5.941	0.003661	Klhl29
0.7991	3.584	0.00371	Rnaset2a
-0.8571	3.583	0.003718	Ddit4l
-2.374	1.138	0.003718	Atp8b1
1.039	4.01	0.003744	Bcas1os2
2.296	1.659	0.003744	Gm10138
0.7773	4.929	0.003891	Hacd1
-1.033	2.758	0.003919	Nme5
-0.6146	5.214	0.003937	9630028H03Rik
0.7069	4.226	0.003937	Ncs1
-0.5132	7.998	0.003937	Cdk19
0.3648	8.809	0.003951	Sorcs2
0.601	4.593	0.003978	Zfhx2os
-0.4221	10.95	0.003978	Prex2
0.9354	3.918	0.003984	Gsg1l
-0.8369	3.255	0.003993	Ppp1r3d
0.6469	4.715	0.003993	Gm31166
-0.6036	5.476	0.003998	Pdzd2
-0.51	5.141	0.003998	Senp3
1.631	2.541	0.003998	Dclk3
1.169	3.218	0.003998	Polr3g
0.6685	4.432	0.004	Tor3a
1.064	3.03	0.004147	Tnfrsf21
3.582	-0.2226	0.004228	Gm48619
-0.6845	4.491	0.004276	Herpud1
-0.3486	8.948	0.004276	Spag9
0.5895	6.068	0.004392	Igsf21
-0.7427	7.27	0.004492	Shroom3
0.4443	6.723	0.004492	Ece1
0.9411	7.957	0.004492	Neat1
-0.4822	6.329	0.004501	Zkscan3
-0.4427	8.569	0.00451	Ndrg2
1.263	3.175	0.00454	Ppfia2
1.126	2.349	0.00454	Rgs5
0.347	10.31	0.00454	Trim9
-0.4411	5.486	0.00454	Ift74
0.542	6.456	0.004557	Ubash3b
-0.865	4.968	0.004557	Hsd11b1
2.115	0.2057	0.004557	Cpa6
1.807	4.768	0.004557	Shisa6
0.7631	4.876	0.004557	Pxdn
-2.125	0.818	0.004591	Gm3055
-0.4384	6.001	0.004591	Gca
5	-0.04287	0.004693	Gm40847
-0.4764	9.258	0.004693	Gm12239
-1.204	2.694	0.004837	Zfp951
-0.665	4.459	0.00484	Zcchc18
-0.6937	6.392	0.004905	Me3
-0.4427	7.02	0.00491	Sat1
1.735	1.221	0.00491	Zc3hav1l
0.689	4.95	0.005007	Man1c1
0.5404	4.763	0.005035	Rnf2
1.139	2.516	0.005225	Catsper3
0.3978	6.093	0.005225	Arhgef40
0.4282	8.356	0.005258	Ccdc141
-0.6373	4.662	0.005316	Hes1
-0.7864	3.682	0.005337	A430033K04Rik
-0.8212	3.751	0.005337	Plpp4
1.857	1.126	0.005338	Gm15943
1.192	4.162	0.005368	E430024P14Rik
-0.8623	4.102	0.005676	Syt17
0.4148	7.444	0.005676	D130040H23Rik
-0.4652	11.02	0.005676	Plcb1
-2.066	0.6616	0.005676	Ppp1r3e
1.251	2.377	0.005676	Adgrf2
1.082	4.15	0.005676	Tox3
-2.075	3.698	0.005751	Rpph1
0.8343	4.227	0.005812	Gdpd2
0.6414	5.42	0.005812	Pacs1
0.5111	6.19	0.005862	Rnf24
1.098	2.123	0.005937	Ovgp1
-0.4517	9.09	0.005963	Phka1
1.711	1.867	0.00605	Gm15663
-0.5675	5.061	0.006065	Castor2
0.5302	6.493	0.006068	Septin11
-0.6877	3.915	0.006068	Ciapin1
-0.5293	5.155	0.006116	Ttr
-0.3737	7.614	0.006209	Nfix
-0.6568	4.191	0.006313	Cherp
-0.4635	9.615	0.006313	Slco1c1
-3.247	-0.2272	0.006333	Tubb3
-0.3328	7.024	0.006442	Crlf3
0.4332	8.54	0.006442	Fhit
-0.4915	5.358	0.006442	Tob1
-0.7801	4.813	0.006442	Col11a2
-0.5379	5.774	0.006475	Per2
7.353	4.275	0.006475	Gm48606
-1.24	4.469	0.006537	Gm19522
0.4618	5.142	0.00658	Fut10
0.3675	11.49	0.006727	Nlgn1
-1.171	3.044	0.006727	Emd
-2.839	2.466	0.006727	Nr4a1
-1.324	2.183	0.006727	Gm48099
0.5923	6.414	0.00677	Flrt2
0.9656	4.947	0.00677	Csmd2
-2.437	1.443	0.006804	Ano5
-0.7456	4.766	0.006804	Spata6
-0.8313	8.667	0.006804	Dio2
-0.5009	4.893	0.006873	Ccdc138
-0.5957	4.49	0.006873	Zim1
-0.6705	7.33	0.006873	Mxi1
-0.7059	5.119	0.007044	Arid5a
-0.4626	9.034	0.007201	Sorbs1
0.3609	6.561	0.007227	Hnrnpl
0.5356	5.201	0.007265	Tpgs2
0.5729	4.971	0.00729	Ankmy2
-1.187	2.021	0.007346	Rpl29
1.55	1.489	0.007641	Scml2
-0.7337	4.285	0.00779	C4b
-0.6393	3.742	0.00779	Mon1a
2.149	-0.3203	0.007843	A430093F15Rik
2.035	-0.1034	0.007865	Gm54359
0.414	6.996	0.008013	Tspan3
-2.343	-0.1703	0.008013	Lims2
1.194	2.706	0.008043	Shank2
-1.538	1.144	0.008043	ENSMUSG00000120194
-0.4687	5.576	0.008116	Rbm28
-0.4231	5.733	0.008116	Pon2
-0.6923	4.784	0.008116	Thrsp
-0.6156	6.527	0.008116	Disp3
1.396	1.796	0.008117	Pvr
0.8986	3.123	0.008117	Plxnd1
-4.733	-0.4593	0.008295	Zfp125
0.3383	6.48	0.008436	Sipa1l3
0.4039	5.872	0.008488	Hnrnpdl
-0.6167	4.765	0.008537	Gm2885
-0.3591	7.805	0.008561	Nim1k
-2.921	-0.5493	0.008594	Gm15425
0.4002	7.125	0.008825	Fads1
-0.3649	6.653	0.008948	Stxbp4
-0.5689	4.109	0.009063	Ptbp1
-2.211	1.598	0.009415	Thbs4
0.7341	3.168	0.009438	Angptl4
0.7211	6.349	0.00944	Igfbp2
-0.6191	5.518	0.009454	Pdia4
-0.8175	4.022	0.009461	Ccdc163
-2.746	1.844	0.009479	Gadl1
-0.4851	7.325	0.009514	Ivd
-0.5674	4.46	0.00953	Irf2bp2
0.7106	6.093	0.009565	Slc6a9
2.201	1.251	0.009636	A530076I17Rik
0.4604	6.963	0.01014	Rnf144a
0.4984	4.531	0.01021	Jun
-0.4043	6.706	0.01023	Top1
1.244	2.948	0.01023	Haus7
-1.209	1.511	0.01025	Hcn2
-0.8661	3.13	0.01026	Pcdhga5
0.4659	6.024	0.01028	Pvt1
-0.66	3.375	0.0103	Gjb2
-0.8423	2.198	0.0103	Cplane2
0.3588	6.3	0.0103	Focad
0.5113	5.895	0.0103	Pfkfb3
0.5672	7.571	0.0103	9530026P05Rik
-1.515	4.407	0.0103	Rab6b
-1.057	2.811	0.0103	Nipal2
-0.4324	8.49	0.01031	Rasa2
2.085	1.004	0.01035	Osbpl3
-0.7083	5.92	0.01036	Adamts6
0.5888	4.936	0.01044	Zcchc2
-0.5728	4.761	0.01047	Steap3
0.4987	4.476	0.01048	Optn
0.4266	5.056	0.01053	Gpc4
-0.5132	4.627	0.01054	Ift122
1.407	2.236	0.01054	Zfp811
-0.4794	7.296	0.01054	Id4
0.4919	9.716	0.0106	Il1rapl1
-0.4359	4.748	0.01072	Rpl21
0.9229	2.982	0.01072	Bbs12
-0.6464	3.648	0.01074	Unc45a
0.6943	6.104	0.01078	Stau2
-0.4858	8.451	0.0108	Vcl
-0.6153	4.861	0.0108	Enpp2
0.4577	5.574	0.0108	Ndufaf2
0.3828	7.492	0.01084	Cask
0.3775	7.412	0.01087	Mitf
-0.7102	5.013	0.01102	Ugt1a6a
-0.4373	7.721	0.01104	Tprkb
0.6989	4.394	0.0111	Hdac5
0.329	7.964	0.01118	Smyd3
-0.6662	3.653	0.01121	Dph5
-0.9337	3.075	0.01123	Borcs8
0.5529	4.168	0.01139	Pogk
0.5208	5.211	0.01139	Gsr
-1.061	8.04	0.01146	Pde4b
-1.788	2.605	0.01146	Fos
-0.3301	9.467	0.01164	Tjp1
-1.252	6.267	0.01164	Map3k19
0.517	5.974	0.01168	Pkp4
-0.3997	12.38	0.01193	Luzp2
-0.6177	3.742	0.01204	Ncapd2
-0.7397	2.98	0.01206	Drc3
-0.429	5.693	0.01232	Txndc11
0.9024	2.886	0.01232	Cd82
2.149	4.002	0.0125	ENSMUSG00000121307
2.144	2.112	0.01271	Pcdh18
0.3527	6.291	0.01274	Elovl2
-1.132	2.406	0.01275	9530052E02Rik
0.7384	4.475	0.01275	Tmem176a
-0.4048	5.225	0.01278	Pnrc2
0.495	4.822	0.01278	1700025G04Rik
-0.5259	5.187	0.01292	Apln
1.09	4.092	0.01293	Chsy3
-1.619	0.9499	0.01301	Cast
0.4342	5.689	0.01302	Mipol1
1.323	3.411	0.01302	Gli1
-0.4605	6.317	0.01302	Gm5089 - ENSMUSG00000064052
-0.4265	5.634	0.01306	Tecpr2
0.5916	9.993	0.01306	Fgf14
-0.8594	2.243	0.01306	Dnai2
0.4153	4.862	0.01315	Ttc39b
1.095	2.479	0.01315	Slc7a6
-1.235	1.071	0.01315	Chd5
-1.722	0.7923	0.01333	Miat
-0.466	5.447	0.01334	Ptma
-2.277	3.78	0.01344	Mpp7
0.8064	3.358	0.01344	Casp3
0.3307	7.268	0.01344	Gm16759
0.9205	3.374	0.01344	Spata13
0.4778	5.856	0.0135	Gm45708
-0.2845	11.81	0.01375	Zbtb20
-0.3385	5.977	0.01395	Cr1l
0.6205	10.44	0.014	Lrp1b
1.123	3.127	0.014	Fmnl3
-0.6717	4.958	0.0143	Fmo1
-0.4683	4.618	0.01435	Mkln1os
0.4101	5.087	0.01448	Cmtm5
0.6856	3.591	0.01448	Tbc1d24
-0.6927	3.962	0.01475	Acaa1a
0.3376	5.791	0.0148	Zbtb37
1.024	1.883	0.01481	Cyb5r1
0.829	3.734	0.01519	Gm20083
-0.3599	5.505	0.01522	Ccdc66
-0.4443	5.389	0.01523	Ift80
1.525	0.6929	0.01556	Dalir
-0.5864	4.313	0.0156	Gm12940
-0.4794	6.898	0.0157	Hapln1
0.4802	6.34	0.01576	Ptprf
0.3508	5.974	0.01576	Paxbp1
0.444	7.302	0.01576	Mfhas1
-1.308	1.792	0.01576	Gm28836
-1.075	6.041	0.0161	Gm10125
0.4108	8.34	0.01612	Shisa9
0.8343	3.588	0.01625	Inhba
0.7766	3.556	0.01625	Zfp458
-0.9745	5.477	0.01625	Crym
-0.7975	7.19	0.01661	Hspa5
-0.4423	5.083	0.01663	Scd1
-4.039	1.901	0.01663	ENSMUSG00000121318
-3.282	-0.3559	0.01663	Gm13274
1.883	1.148	0.01671	Gm49331
-0.5748	3.779	0.01681	Pwp1
-0.3548	8.467	0.017	Fermt2
0.5696	4.79	0.01708	Tbc1d4
-0.4371	7.452	0.01715	Pfkp
-1.292	1.468	0.01715	Cdc45
-0.6003	4.633	0.01736	Gas5
0.6299	3.368	0.01742	Rsad1
-0.7996	3.351	0.01742	Ikbke
-0.8307	4.826	0.01742	Ttll3
0.3451	8.372	0.01742	Fads2
-0.4041	7.813	0.01747	Syn2
0.4501	5.093	0.01755	Rdh11
-0.9232	2.62	0.01789	Plk2
0.4835	4.796	0.01794	Pcdhga12
1.148	2.264	0.01794	Gm33906
2.009	3.093	0.01807	Mctp1
-1.162	1.049	0.01817	4933433G19Rik
-0.3124	7.945	0.0182	Aak1
0.8602	2.811	0.0182	Tlr4
5.771	1.435	0.0182	Gm49692
-1.371	0.9291	0.0182	Cerkl
-0.4748	4.006	0.0182	Wdr19
0.6114	5.99	0.01823	Gm45846
1.22	1.04	0.01823	Ndn
-0.4746	3.946	0.01823	Ccdc173
-0.5157	3.713	0.01825	Pcdhga6
1.001	2.075	0.01827	Runx2
-0.8319	2.438	0.01833	ENSMUSG00000120113
0.7552	7.365	0.01846	Gm26512
4.149	1.364	0.01846	4930519F16Rik
-0.3411	7.521	0.01846	Mapre2
0.4011	7.336	0.01846	Stt3b
-0.434	4.969	0.01846	Cfap36
0.3685	4.975	0.01852	Rnf139
-1.547	0.6299	0.01852	9430065F17Rik
0.3942	5.436	0.01876	Rcor3
0.4221	4.865	0.01876	Sgpl1
0.3009	8.539	0.01906	Camta1
0.3473	5.57	0.01924	Dnajc18
0.354	5.941	0.01924	Adgrb2
-0.39	6.284	0.01929	Zbtb38
0.384	5.181	0.01931	Lhpp
0.9495	5.328	0.01931	Ror1
-0.4208	7.621	0.01966	Lgi1
0.8847	4.872	0.01966	Catspere2
0.7324	4.765	0.01981	9330179D12Rik
-0.3437	10.08	0.01981	Mir100hg
1.369	2.27	0.01982	Rasgef1b
-0.3693	5.729	0.01982	Pfkfb4
0.4571	3.937	0.02006	Qsox1
-0.9176	8.909	0.02018	Zswim6
-0.6255	3.779	0.02023	Fuz
0.5804	6.552	0.02023	Apba1
-0.4367	5.1	0.02027	Bbof1
-0.2895	6.325	0.02038	Sdccag8
-0.3844	6.38	0.02038	Sycp2
-0.4809	4.898	0.02049	Slx4ip
-0.575	3.287	0.02056	Gm4491
-1.107	1.69	0.02065	Srp54a
1.013	7.752	0.02066	Itih3
-0.5911	3.719	0.02067	Gm32200
-0.4288	4.609	0.02086	Fam227a
0.3604	6.248	0.02086	Cdk17
1.601	-0.05514	0.02086	Papln
0.3745	6.73	0.02099	Zfp827
-0.3199	8.645	0.02113	Rfx4
0.3615	6.365	0.02115	Mir124-2hg
-0.4976	5.355	0.02115	Cep120
1.812	-0.2502	0.02118	Marveld2
-0.4346	5.013	0.02118	Shld1
0.8158	3.961	0.02127	Myo16
0.6543	3.935	0.0214	Eepd1
-0.7171	3.666	0.02146	Rfxank
1.534	0.8331	0.02154	D430019H16Rik
0.7224	4.707	0.0216	Fah
-0.8468	1.731	0.02161	Gm15816
-0.6468	3.494	0.02161	Ccdc13
-0.2964	6.558	0.02161	Prrc2a
0.5707	4.045	0.02161	Nampt
-0.4883	4.139	0.02161	Fra10ac1
-0.9735	4.322	0.02161	Ccn1
-1.022	2.958	0.02163	Creld2
0.4805	5.398	0.02163	Gm41836
0.6346	3.163	0.02163	Slc22a21
0.5876	4.222	0.02163	Septin6
-0.3779	5.3	0.02163	Trmt1l
-0.9575	1.904	0.02198	Obsl1
-1.085	1.835	0.022	Prss23
-1.477	4.606	0.02207	A730056A06Rik
1.392	0.9689	0.02222	Gm18103
-1.28	6.091	0.02222	Slc25a21
-1.007	2.321	0.02222	Pkd2l2
-0.326	5.477	0.02222	Tor1aip2
-0.884	5.582	0.02222	Slc43a2
0.4479	4.605	0.02239	Pacsin2
-0.4831	4.095	0.0224	9530077C05Rik
-0.5804	5.106	0.02241	Zfp933
-0.517	4.084	0.02241	Fam76a
0.3602	5.376	0.02241	Dtnbp1
-0.5274	6.675	0.02241	Pcdhgb2
-0.2919	7.477	0.02241	Ctdspl
-0.5085	3.711	0.02241	6430511E19Rik
-0.6587	4.949	0.02247	Manf
-0.4534	5.644	0.02253	Kcnk10
1.026	1.588	0.02266	2900089D17Rik
-0.4748	5.597	0.02266	B4galt6
-0.9647	2.373	0.02287	AI197445
-0.4781	4.505	0.02306	Hdac1
0.3253	6.312	0.02306	Lrrk2
-0.7785	2.703	0.02306	Mrpl27
-1.378	0.5697	0.02344	Cdh24
1.279	2.716	0.02367	Epb41l4a
-0.3239	7.648	0.02367	Dlg1
0.3573	6.532	0.02367	Sema4a
-0.449	4.797	0.02367	Coa8
-0.9201	2.101	0.02387	ENSMUSG00000119968
0.3273	8.578	0.02391	Ntsr2
0.2712	7.481	0.02416	Dnmt3a
0.7687	2.384	0.02418	Txnrd3
-0.3568	5.017	0.02418	Clasrp
-0.6467	3.191	0.02418	Tlcd2
0.3949	6.032	0.02418	Ttyh2
0.6367	5.08	0.02431	Slc2a13
0.3163	5.508	0.02433	Blcap
0.5287	3.818	0.02459	Zfp2
-0.6862	4.855	0.02489	Arrdc3
0.3389	6.999	0.02489	Supt3
0.6891	3.325	0.02507	Arxes2
0.464	4.851	0.0253	Mpp2
-0.5929	3.617	0.0253	Map6
0.9278	2.153	0.02545	Ip6k3
0.6251	3.71	0.02564	Gnai1
0.4804	4.228	0.02571	Cbr3
1.29	0.9197	0.02587	Kif4
1.165	2.25	0.02587	Gm45650
0.3436	5.468	0.02587	Plaat3
-0.4901	4.849	0.02587	Gabrb3
-0.5048	4.046	0.02591	Dnajb2
-1.053	3.098	0.02591	Frrs1
-1.526	0.9555	0.02593	Hyi
0.4249	4.306	0.02593	Smpd2
-0.5049	4.848	0.02596	Hsd17b7
-0.4746	6.534	0.02607	Chst2
-0.419	5.686	0.0261	Gm48742
0.8786	3.919	0.02626	Tmprss7
1.272	1.251	0.02673	Lgals12
-0.4696	4.295	0.02673	Zfp738
1.692	2.34	0.02692	Rsad2
1.183	4.58	0.02692	Sh3rf3
0.4599	4.508	0.02692	Slc25a27
-0.3606	5.379	0.02692	Ppm1k
-0.5079	3.748	0.02692	Mbd6
0.3376	5.27	0.02695	Cep83
0.8382	4.379	0.0271	Hhipl1
-0.2704	6.726	0.02714	Ikzf2
-0.9878	1.581	0.02729	Leng9
0.5346	6.858	0.02734	2210408I21Rik
0.9819	2.768	0.02768	B230303O12Rik
-0.4822	3.819	0.02773	Cplx2
-0.3348	5.515	0.02773	Sf3a1
-1.279	1.227	0.02804	Gm2415
-1.208	1.623	0.02804	Adora2a
-0.8973	1.719	0.02804	Iqcg
-0.3274	5.729	0.02804	Zscan26
-0.426	8.038	0.02804	Sesn3
0.5899	3.036	0.02804	Ankrd50
0.2901	6.109	0.02804	Tcp11l1
1.721	0.4463	0.02804	Capn9
-0.8944	2.316	0.02849	Gm7240
-0.6466	4.49	0.02849	Elavl3
1.032	2.051	0.02849	Gm48967
-0.2576	7.756	0.02856	Gpatch8
-0.4	11.1	0.02856	Cpe
0.3387	6.002	0.02858	Eif2ak4
-0.671	3.769	0.02859	2900026A02Rik
-1.35	0.362	0.02899	Scg2
-0.4124	4.457	0.02899	Fis1
-0.2969	6.181	0.02899	Slc38a9
-0.564	4.547	0.0292	Rhpn2
0.2774	7.715	0.0292	Ccdc50
-0.6461	7.993	0.02934	Gm19951
0.4702	4.403	0.02935	Efs
0.4685	5.14	0.02941	Tfrc
0.6286	4.294	0.02941	Sfmbt2
-0.6476	3.441	0.02941	Cep85
-0.5556	4.341	0.02941	Hsph1
1.414	0.3523	0.02942	Dscam
0.3939	4.799	0.02944	Hexa
-0.6493	3.021	0.02967	Htra3
0.6774	3.075	0.02973	Amer1
-0.3136	6.524	0.03009	Cd2ap
0.6916	5.941	0.03009	Smad3
0.3097	5.594	0.03012	Rimoc1
0.828	2.222	0.03012	Tsku
-0.4356	4.425	0.03032	Gstt1
0.512	8.094	0.03032	Mfap3l
-0.6814	2.755	0.03079	Gm37848
-1.081	1.757	0.03093	Ccdc92
-0.3445	7.139	0.03096	Ankrd6
-0.7093	2.616	0.03096	Iqcc
-0.3553	6.044	0.03096	Ccdc190
0.6943	3.871	0.03096	Tmem131l
-0.9241	1.481	0.031	Ttc30b
0.5473	3.904	0.03105	Gm20687
-0.3328	10.48	0.03118	Farp1
0.4691	4.112	0.03121	Acp6
-0.3199	6.3	0.03121	Luzp1
-0.4278	4.414	0.03132	Malsu1
0.4449	6.496	0.03133	Hectd2os
-0.6565	4.695	0.03158	Rfx2
0.2899	8.097	0.03166	Actb
0.3907	7.541	0.03166	Zfp423
0.5195	3.871	0.03178	Slc35g2
0.5105	8.129	0.03178	Kcnj10
0.2933	8.022	0.032	Sirpa
-0.3557	5.115	0.03202	Wdr35
0.9202	1.991	0.03248	Dsel
-0.2728	10.05	0.03297	Hdac8
0.796	3.138	0.03312	B4galt1
-1.811	0.994	0.03312	Gm5083
0.7251	3.273	0.03326	Gm1604b
-0.3034	7.426	0.03382	Dbx2
1.355	6.002	0.0339	Inpp4b
-0.2726	8.982	0.0339	Prkd1
-0.2974	6.126	0.03391	C2cd3
-0.3121	6.027	0.03405	Copa
-0.4791	3.978	0.0341	Spice1
0.4859	4.54	0.03444	Trp53
0.7839	4.095	0.03465	Pcdh19
0.7818	4.865	0.03465	Notch3
1.178	0.6976	0.03465	Gm42890
0.547	4.625	0.03476	2610316D01Rik
0.4499	5.796	0.03482	Pygm
-0.7023	3.798	0.0353	Gm266
-0.2745	6.757	0.03545	Mbtd1
-0.3044	7.774	0.03549	Rabgap1l
0.384	4.842	0.03549	Fbxo10
-1.973	3.461	0.03552	Sik1
-0.6706	8.602	0.03577	Akap6
-0.2947	10.47	0.03594	Gpc6
-0.3177	8.179	0.03615	Gldc
1.947	3.358	0.03629	Cfap54
-0.5279	3.728	0.03629	Gm26944
-0.348	4.394	0.03651	Tox4
-0.5692	3.586	0.03661	Smad6
0.722	5.15	0.03662	Gm26691
-0.6289	4.882	0.03675	Hyou1
0.3096	7.996	0.0368	Peli2
1.833	0.6798	0.0368	Slc12a8
-0.8981	2.353	0.0368	6330576A10Rik
3.48	2.415	0.03688	Gm36372
-1.07	1.716	0.03688	G0s2
-0.6938	4.956	0.03691	Brsk2
0.3299	5.737	0.03706	Nat8f6
1.13	4.849	0.03707	Jag1
0.859	1.722	0.03723	Gm36445
0.9034	2.491	0.03727	Ttn
0.2813	6.94	0.03759	Purg
-1.117	1.74	0.03775	1190007I07Rik
0.3155	6.82	0.03775	Snx25
0.2957	9.121	0.03777	Gm6145
1.165	1.436	0.03854	Sh2b2
0.8052	2.991	0.03854	Klhl25
-0.3131	10.95	0.03854	Gnao1
1.755	0.6736	0.03868	Gm19196
-0.2375	8	0.0387	Zcchc7
0.3175	6.506	0.0387	Glrb
-0.4808	7.021	0.0387	Calr
0.426	5.329	0.03874	Bmp7
-0.985	2.301	0.0388	Gm6225
0.8528	3.347	0.0388	Cpne8
-0.7745	8.555	0.03904	Cdh19
-0.5987	3.797	0.03904	Glb1l
-0.4105	5.118	0.03904	Emx2
0.4347	5.858	0.03904	Ranbp17
0.4036	5.334	0.03904	9330188P03Rik
0.4193	4.978	0.03904	Fhl1
-0.3394	5.083	0.03904	Prepl
0.4774	3.698	0.03904	Msh2
-0.3648	5.727	0.03913	Slc25a33
-2.899	0.6807	0.03926	Pawr
0.292	5.709	0.03936	Qser1
0.3671	5.89	0.03978	Clcn5
0.707	2.763	0.03987	2410002F23Rik
-0.8316	2.315	0.0399	Gm46440
0.3151	4.875	0.0401	Rnf145
-1.019	1.113	0.04019	Plscr2
0.5799	2.92	0.04061	Rfesd
1.637	0.1797	0.04061	Gm12689
-0.5591	3.179	0.0409	Dusp12
0.2894	6.991	0.04101	AW554918
0.2899	11.4	0.04107	Adgrb3
0.3637	5.933	0.04111	Mpzl1
0.5893	4.485	0.04169	Dtx4
-0.2761	6.424	0.04169	Relch
0.5245	4.094	0.04178	Rbpms2
-1.13	1.66	0.04184	6330403K07Rik
-0.3183	6.597	0.04222	Gpcpd1
-1.004	0.8493	0.04224	Tcerg1l
-0.3488	5.049	0.04226	Iqce
-0.4603	6.261	0.0423	Camk2n1
-0.3777	4.861	0.04231	Zranb3
-0.3724	4.468	0.04265	Ift88
0.6553	3.169	0.04282	Tyro3
-1.642	0.3467	0.04295	Ngfr
0.4153	4.81	0.04295	Gdf11
-0.3418	5.063	0.04321	Dnaja1
-0.4325	4.555	0.04325	Pcdhb14
0.9259	5.089	0.04393	C130073E24Rik
-0.383	7.381	0.04408	Ranbp3l
-0.2829	7.027	0.04436	Tank
-0.3657	4.576	0.04436	Mxd1
-0.9583	1.583	0.04439	Pcdhb12
0.2785	6.773	0.04443	Trerf1
0.4646	7.278	0.04445	Fggy
-0.3749	7.586	0.04472	Dkk3
-1.177	5.827	0.04474	Pdgfd
0.3703	5.508	0.04475	Amph
-0.261	7.967	0.04475	Dnajc1
-0.3307	5.537	0.04475	Amd1
-0.3597	4.596	0.04475	Vstm4
-0.5687	4.354	0.04477	Zbtb40
-0.4907	3.743	0.04489	Fam229b
0.5513	3.994	0.04489	Mgat3
0.2972	6.016	0.04519	Khdrbs3
0.7767	3.004	0.04519	1810024B03Rik
-0.5497	2.619	0.04519	Igf2bp3
0.5678	6.175	0.04519	Syne2
-0.3091	5.962	0.04519	Senp1
-0.3407	4.626	0.04527	Ttf1
0.2811	6.474	0.04561	Rab3gap2
0.5476	4.418	0.04579	Cstf2
-0.3667	4.984	0.04586	Med25
-0.4017	4.092	0.04597	Cep89
-0.2745	6.957	0.04597	Afg1l
-0.4485	4.484	0.04597	Armc2
0.2986	6.918	0.04603	Acss2
0.6185	3.447	0.0461	Slitrk5
0.5425	3.782	0.0461	Ubtd2
-0.3245	9.755	0.0462	Dab1
0.4931	6.166	0.04643	Tiam2
-1.111	0.9469	0.04646	Gm28064
0.4435	4.502	0.04646	Mical1
0.8705	3.612	0.04646	Ptgs1
-0.8232	2.609	0.04646	ENSMUSG00000120221
-0.6927	2.575	0.04646	Odc1
-0.5208	2.803	0.04657	ENSMUSG00000121141
0.8853	2.93	0.04657	Gm960
-0.3351	8.981	0.04657	Ahcyl1
1.001	2.203	0.04659	Lrrc69
-1.374	1.313	0.04669	Gm42047
-0.925	6.252	0.04686	Usp2
0.5041	3.421	0.04686	Ss18l1
-0.4542	3.845	0.04708	Epo
-0.3304	5.87	0.04723	Rspry1
-0.9405	1.514	0.04735	Dixdc1
0.6789	3.244	0.04735	Niban2
0.7041	3.231	0.0476	Ttl
1.129	6.278	0.0477	Tnfaip8
-0.7729	4.489	0.04775	Nphs1
-0.2729	7.786	0.048	Chd2
0.5509	3.816	0.04803	Arhgef6
1.241	1.424	0.04803	Gm49673
0.3025	8.432	0.04807	Fgf12
0.4349	4.189	0.04807	Lamtor3
0.508	4.353	0.04815	Usp28
-0.6586	3.026	0.04823	Rfx1
-0.3278	9.499	0.04824	Pde8b
-0.5016	3.148	0.04824	Ece2
0.3604	4.866	0.04828	Ephx1
-0.2965	6.285	0.04832	Creb1
0.4444	4.253	0.04833	Snx30
-0.2497	6.572	0.0486	Baz1b
-0.5387	4.361	0.04862	Mtmr4
-1.454	1.398	0.04862	4833411C07Rik
-0.8951	1.232	0.04867	Gm42723
1.549	0.7949	0.04893	Mill2
-0.3646	4.381	0.04902	Caml
0.2655	6.578	0.04923	St7
-0.4425	3.978	0.04939	Gm46430
0.4586	4.049	0.04939	Zfp81
1.972	-0.1415	0.04945	Iqcm
-0.3831	4.468	0.04993	Dbndd2
-0.2489	9.866	0.04999	Hivep3
-0.7037	2.487	0.05004	Ormdl2
0.6246	5.77	0.05004	Trib2
0.4893	5.806	0.05013	Mef2c
-0.4541	3.385	0.05023	Taf13
0.5321	4.023	0.05034	Spcs3
-0.5408	7.562	0.05082	Bcar3
0.3709	5.204	0.05082	Dlg3
-0.659	2.185	0.0509	Tmem88b
0.3761	4.836	0.0509	Nek6
0.3653	5.772	0.0509	Mtcl1
-0.5037	4.177	0.05109	Gnptg
-0.8582	7.654	0.05116	Adam23
-0.4068	4.397	0.05127	Rnpep
0.475	4.115	0.05136	Osgep
-0.6333	2.173	0.05182	Gm12279
-0.3913	7.835	0.05209	Nt5c2
-0.5057	3.176	0.05213	Zfp446
2.115	-0.006516	0.05213	Ahr
0.3899	4.245	0.05213	Rnft1
0.6128	7.094	0.05217	Epha5
-0.2408	6.98	0.05218	Dennd1b
0.4385	4.037	0.05218	Ppat
-0.5723	3.036	0.05222	Rgs22
-0.3539	6.437	0.05227	Rarb
-0.6022	3.148	0.05227	Rgl2
-0.3892	4.837	0.05236	Palm
0.8084	2.892	0.05248	Zscan18
-0.4926	3.668	0.05251	Lmln
0.5123	3.979	0.05251	Fancm
-0.2363	7.033	0.05251	Dis3l2
0.2332	7.163	0.05251	Pgm1
0.7461	2.628	0.05268	Gm29427
0.5719	3.306	0.0527	2610507I01Rik
0.4121	4.984	0.05275	Acaa2
-0.3148	5.348	0.05294	Gorasp2
0.5787	3.501	0.05298	2700054A10Rik
-0.4427	4.357	0.05307	Rnft2
0.7042	3.714	0.05309	Kitl
0.2903	6.335	0.0532	Cd63
-1.394	0.8413	0.05364	Gm3294
0.3026	6.159	0.05383	Phc2
-0.2634	7.292	0.05393	Hivep1
-0.6995	3.287	0.05393	Smg9
-0.475	3.613	0.05393	Txlnb
-0.4492	3.889	0.054	5330406M23Rik
0.4987	3.325	0.05425	Tep1
-0.7566	2.611	0.05446	Csf2ra
-2.384	2.977	0.05488	Rab27b
-0.8503	3.264	0.05488	Slc7a5
-0.9618	1.886	0.05497	Adamtsl1
-0.4243	5.694	0.05497	Lmcd1
-0.5196	4.149	0.055	Amz2
0.3414	6.057	0.05512	Tspan14
-0.7477	2.761	0.05512	Gm54867
-0.515	5.79	0.05512	Igfbp5
-0.7695	1.952	0.05512	Fgfbp3
0.3608	7.304	0.05517	Hrh1
0.3372	5.4	0.05517	2510009E07Rik
1.449	0.254	0.05519	Gm47209
1.425	0.9737	0.05534	Slc1a5
1.181	8.256	0.05549	Rbms3
0.743	1.849	0.05549	Fam83f
0.4339	4.32	0.05549	Dnhd1
0.4235	3.796	0.05549	Grpel2
0.6415	4.536	0.05568	Shisal1
-0.5001	4.863	0.05603	Hspa2
0.5232	4.32	0.0561	Mettl6
-0.3724	4.308	0.05625	Zbtb7a
-0.9388	1.544	0.05649	Gm17501
1.728	0.5312	0.05651	Gm49064
0.4833	4.173	0.05704	Stard9
1.441	0.3334	0.05716	1700011L22Rik
0.4773	4.259	0.05719	Acadvl
0.2911	5.975	0.05719	Gm48747
0.2461	7.442	0.05745	Med12l
-0.3138	5.318	0.05831	Kif3a
-0.9757	3.275	0.0585	Ank1
-0.583	3.051	0.05872	Gm40466
0.4941	3.395	0.05927	Dis3
0.7468	5.612	0.05927	B3galt2
0.8324	4.92	0.05927	Angpt1
0.3717	6.222	0.05927	Fnip2
0.2338	6.279	0.05927	Gm33989
-0.3318	6.291	0.05951	Itpr1
-0.6795	4.068	0.05957	Ddit4
-0.2713	9.949	0.05988	Nhsl1
0.3327	4.772	0.05988	Nfe2l1
0.4156	4.42	0.06004	Nat8f5
0.3485	5.593	0.06028	Epm2a
-0.6218	3.686	0.06037	Hspb8
-0.8773	1.906	0.06054	Rfx8
-0.429	3.94	0.06072	Fmo5
0.4134	4.458	0.06098	Pgap4
-0.7067	1.916	0.06098	Cr2
0.7298	2.665	0.06098	6030407O03Rik
-0.8471	1.309	0.0613	Parvaos
-0.3529	4.751	0.06134	Rnf4
0.5404	4.347	0.06134	Il17rd
-0.6126	3.453	0.06145	Mok
-0.2347	6.413	0.06148	Snapc3
-0.8203	1.717	0.06168	Togaram2
0.5968	3.799	0.06223	Cnr1
0.6464	2.44	0.06232	Rhoc
0.3095	4.69	0.06237	Fam76b
2.695	-0.6097	0.06243	Gm30275
-0.4047	3.903	0.06243	Mtfr1
-0.601	3.129	0.06243	A230056P14Rik
1.484	0.1535	0.0629	Itpka
0.9172	1.313	0.06311	Depdc7
-0.4323	4.736	0.06342	Slf1
0.6217	3.813	0.064	Vav2
0.3743	5.498	0.06422	Dtd1
-0.9002	1.615	0.06476	Dpysl4
0.3522	4.324	0.06476	Fam210a
0.992	0.9212	0.06485	4930505A04Rik
-0.43	4.969	0.06489	ENSMUSG00000120639
-1.088	0.6923	0.06573	ENSMUSG00000121378
0.3186	4.916	0.06581	Fbxo30
-0.3459	5.305	0.06581	Pcdhgc5
-0.394	5.169	0.06581	Trp53inp1
0.3391	6.096	0.06581	Hmgn3
-0.3096	6.012	0.06583	Dbi
1.024	0.9809	0.06583	Gm9320
-0.8491	1.544	0.06583	Tekt1
-0.5	3.15	0.06584	Dffa
-1.533	0.2885	0.06636	Gm14569
-0.5894	4.446	0.06642	Xbp1
-0.5698	2.513	0.06642	Blm
-0.4034	3.684	0.06651	Slc25a14
1.499	0.7778	0.06651	F2r
-0.28	6.673	0.06651	Clk1
0.6519	2.431	0.06651	Gm17114
-0.3612	6.601	0.06651	Gm4876
0.6076	3.394	0.06654	Tmem64
0.9851	0.8238	0.06686	Smtn
0.4131	4.336	0.06686	Cacnb1
1.156	1.356	0.06686	Rps6ka6
0.2446	5.733	0.06689	Cd164
0.6455	2.635	0.06705	Usb1
0.3735	6.565	0.06731	Gtf2ird1
-0.2961	4.89	0.06731	Mapk1ip1l
0.4659	4.074	0.06763	Msn
-0.2412	7.964	0.0677	Gpld1
0.2825	5.999	0.06823	Tom1
0.4898	5.015	0.06891	Tmem176b
-0.2628	5.945	0.06895	Mysm1
0.6167	2.787	0.06895	Gcnt2
1.017	6.277	0.06895	Dok6
0.9566	1.942	0.06895	ENSMUSG00000120303
-0.4844	3.936	0.06895	Bsn
-0.258	9.124	0.06937	Thrb
0.7943	2.634	0.06937	Apcdd1
-1.921	6.753	0.06937	Etnppl
1.716	0.7221	0.06937	5430437J10Rik
0.2807	5.156	0.06952	Ctnnal1
-0.2257	7.86	0.06952	Mkln1
1.364	0.2877	0.06965	Gm15104
1.321	0.8998	0.06965	Gm12296
-0.6549	2.88	0.06989	Hmgn2
0.2452	8.703	0.06989	Abca1
0.3451	5.191	0.06998	Kif3c
0.8758	2.476	0.07004	Cd44
-0.3396	7.415	0.07025	Tle1
1.196	1.3	0.07052	Chst9
0.351	6.077	0.07066	Ankrd29
0.3102	5.117	0.07067	Slc39a10
-0.2612	5.834	0.07146	9630014M24Rik
0.5043	3.568	0.07146	Bcl7c
0.5701	2.626	0.07146	Gm42549
-0.7277	2.772	0.07146	Capn10
1.077	0.7897	0.07148	Gm12473
-0.8721	4.836	0.07241	Nrg2
-0.3492	4.249	0.0726	Ids
-0.2584	7.528	0.0726	Cstpp1
0.9978	1.545	0.07278	1700017M07Rik
-1.021	0.9429	0.07284	Gm26788
-0.5891	2.47	0.07285	Exosc3
0.2934	7.329	0.07328	Oxr1
1.779	-0.2989	0.07376	Gm47557
0.2762	5.341	0.07376	Agrn
0.6685	6.056	0.07376	Car8
-0.2532	5.677	0.07453	Ywhab
-1.52	0.6936	0.07453	Abi3bp
-0.2263	6.502	0.07455	Pcbp2
1.188	1.176	0.07459	Rnf150
-0.6307	3.489	0.07459	Cdo1
0.2808	7.627	0.07459	Btbd9
-0.2801	5.447	0.07459	Cdc123
0.6263	2.636	0.07459	Ankrd13b
0.8469	2.528	0.07461	Adam32
1.194	0.897	0.07471	Frmpd3
0.7577	6.179	0.07482	A630089N07Rik
0.3128	5.387	0.07488	Lamc1
-0.4818	3.438	0.07488	ENSMUSG00000120241
1.629	0.2027	0.07499	Chst3
0.3462	4.845	0.07499	2900076A07Rik
0.3702	4.443	0.07549	Ccm2
0.4615	3.743	0.07584	Snhg14
-0.409	4.346	0.07615	Klhl20
-0.729	2.202	0.07615	Gm10516
0.3268	5.926	0.07636	Actg1
-0.5266	3.737	0.07636	Ccdc61
-1.121	0.546	0.0765	Pnma8a
0.6279	2.738	0.07669	Mrpl14
1.007	0.9423	0.07715	Tfap4
-0.4319	3.793	0.07731	Zfp865
0.233	6.994	0.07739	2310022B05Rik
0.3002	5.67	0.07743	Trim24
-0.4563	3.911	0.07743	B230354K17Rik
-0.5312	2.985	0.07749	Gnpda1
-0.2758	7.978	0.07782	Septin7
-0.317	9.651	0.07831	Cdh20
-0.2653	7.68	0.07831	Wwtr1
-0.2881	7.232	0.07831	P4ha1
-1.032	8.203	0.07831	Phactr1
0.221	13.4	0.07831	Gpc5
0.9763	1.018	0.07833	Bend6
0.3152	5.619	0.07833	Pmp22
-0.3428	4.405	0.07833	Ccdc77
-1.127	0.07023	0.07837	Tmem51os1
0.2929	6.297	0.07837	Pea15a
0.5533	3.351	0.07837	Prrg1
-0.6185	2.903	0.07837	4931414P19Rik
-0.3399	5.939	0.07837	Mtarc2
-0.3175	5.67	0.07837	Apc2
-0.3431	6.527	0.07841	Lhx2
-0.5138	4.153	0.07854	Rpap3
0.2285	9.071	0.07854	Prnp
-0.8338	1.319	0.07854	Lrrc19
0.306	10.82	0.07854	Apoe
0.5502	2.68	0.07854	Isoc1
0.455	4.916	0.07854	Tanc1
-0.642	2.606	0.07854	Btg2
0.4467	3.693	0.07854	Polr3e
0.7686	2.813	0.07915	Syt7
-0.8299	2.921	0.07937	Rps3a1
-0.3187	7.742	0.07956	9430041J12Rik
-0.9857	0.5716	0.07961	Ocln
-0.3698	6.324	0.07961	Omg
0.5056	3.57	0.07961	Impa2
-0.259	6.273	0.07961	Tbc1d32
0.2954	7.572	0.07961	Tafa5
0.306	5.451	0.07963	Ctps2
-0.3393	4.288	0.07963	Il17ra
-0.7894	1.331	0.07963	Prox2os
0.9747	1.315	0.07963	Sbsn
0.3048	5.367	0.07969	Gas6
-0.3	5.732	0.08006	Nfe2l2
-0.3271	4.884	0.08008	Cgrrf1
-0.2693	6.332	0.08008	Arhgef19
0.3392	5.04	0.08023	Tmem65
-0.6756	5.621	0.08127	Ralgps2
-1.095	0.3425	0.08133	2810025M15Rik
-0.5587	3.82	0.08133	Cpt1c
-0.3905	4.728	0.08133	Mlec
0.7303	2.49	0.08133	Zfp457
-0.9013	1.84	0.08133	Lpar1
0.7955	1.942	0.08133	Cutc
0.5613	2.636	0.08133	Ptk7
-0.2611	6.88	0.08133	Slc3a2
-0.4362	4.232	0.08133	Cyp46a1
0.602	5.199	0.08133	Gm4221
1.069	1.011	0.08133	Chst7
0.2218	9.259	0.08138	Prkn
0.679	2.257	0.08158	Gm5441
-0.5406	2.769	0.08158	Gm26910
0.388	4.511	0.08158	AW011738
-0.2611	5.173	0.08161	Dazap1
-0.3604	5.23	0.08166	Tcn2
-0.9623	1.355	0.08166	Grb14
0.7738	2.7	0.08178	Atp8a2
0.5847	2.94	0.08207	Nod1
-0.469	6.701	0.08207	Dpyd
-0.2742	5.995	0.0821	Creb3l2
-0.6141	5.416	0.0821	Pdia6
1.114	0.5531	0.0821	Tmem74b
-1.532	5.233	0.08213	Rpe65
-0.3221	9.437	0.08241	Sik3
-0.8016	1.706	0.08274	C530044C16Rik
-0.2002	7.686	0.08274	Trip12
0.2032	7.877	0.08274	Acaca
-0.3537	5.264	0.08286	Cep162
-0.2331	6.536	0.08299	Hmbox1
1.261	-0.1318	0.08303	Gm50323
0.848	1.612	0.08324	Hdc
0.2187	6.592	0.08334	Tmem170b
0.3696	5.98	0.08354	Wnt7a
-0.2406	5.8	0.08363	Phf8
-0.5417	2.557	0.08363	Gm47350
0.2867	5.758	0.08363	Myo5a
-0.4283	3.344	0.08363	Trmt6
-0.6035	8.942	0.08363	Fam20a
0.2861	7.179	0.08363	Elmo2
-1.126	0.09053	0.08372	Gm20501
-0.5842	4.225	0.08372	Rbp1
-0.2468	5.977	0.08372	Gpbp1
0.2292	8.012	0.08372	Adcyap1r1
0.3214	4.025	0.08372	Hinfp
-0.418	4.607	0.08391	Tmem104
-0.2924	7.999	0.08395	Fam184a
0.2865	5.331	0.08395	Ipo9
0.51	3.187	0.084	Snx8
-0.2567	7.425	0.08406	Kansl1l
-1.227	-0.01666	0.08406	ENSMUSG00000121232
-0.4293	4.888	0.08406	Deptor
-1.162	-0.09576	0.08434	Gm44129
-0.6559	2.143	0.08438	Reep2
1.206	6.093	0.08446	A330033J07Rik
-1.238	3.107	0.08446	Adamts10
-0.3443	4.944	0.08446	Calm3
-0.6466	2.394	0.0848	Tspan33
-1.214	0.9793	0.0853	Gm48693
0.3187	5.2	0.08556	Aldh4a1
-0.3274	5.498	0.08575	Cerk
-0.6949	5.423	0.08577	Per1
-0.2725	5.306	0.08595	Srrt
-0.4212	3.757	0.08613	Rnf167
0.7153	6.21	0.08613	Fam184b
0.8082	1.656	0.08613	Actn1
1.519	1.368	0.08613	Fgd3
-0.5214	2.304	0.08622	Mrpl36
0.6184	2.463	0.08644	Bend3
0.3593	4.191	0.08661	Slc35f5
-0.392	6.904	0.0867	Atp1b1
1.184	2.588	0.08719	Nkx6-2
0.9106	1.307	0.08719	4933404O12Rik
-0.3761	3.653	0.08719	Pcdhga7
0.3012	5.298	0.08728	Gclc
0.6407	2.628	0.0874	Lzts3
-0.2444	11.18	0.08742	Ptprt
-0.3274	4.912	0.08817	Sox1
1.17	0.02483	0.08817	Atp6v0a4
-0.7986	4.189	0.08821	Junos
0.2726	5.465	0.0884	Atg4c
0.2356	5.71	0.0884	Rab12
-0.2458	7.428	0.0886	Galnt1
0.2698	5.192	0.08872	Brms1l
-0.2681	5.494	0.08872	1110059E24Rik
-0.9693	5.655	0.08876	C030005K06Rik
1.128	0.1756	0.08895	Gm45321
0.2544	7.725	0.08913	Cyp7b1
-0.3296	4.855	0.08913	Dnajc19
0.2568	6.096	0.08915	Nphp3
-0.684	1.823	0.08918	AI837181
-0.3582	3.829	0.08928	Nup155
-1.82	0.8505	0.08928	Susd4
0.3665	7.837	0.08928	Tmem178b
0.2712	8.432	0.08928	Ehbp1
-0.2384	8.301	0.08979	St3gal4
0.2232	7.707	0.08996	Fndc3b
-0.7085	1.713	0.08996	Fbxl2
-0.1997	9.535	0.09001	Cdh2
0.2059	7.578	0.09007	Soat1
0.3734	3.894	0.0902	Mtfr1l
1.688	0.0799	0.09037	Sspo
-0.7874	1.727	0.09047	Emid1
0.7341	1.67	0.09047	Star
-0.706	1.808	0.09059	Gm15713
-1.156	0.1002	0.09059	Gm42936
-1.242	1.149	0.09064	Samd9l
-0.6731	7.077	0.09134	Usp53
-0.8863	1.213	0.0916	Spa17
1.407	0.5546	0.09169	Gm6185
-0.3397	5.676	0.09169	Gbe1
-0.4508	3.926	0.09202	Nmi
0.487	3.227	0.09202	Tmem38b
0.2792	5.654	0.09228	Snx10
-0.3176	5.906	0.09238	Bhlhe40
-1.309	5.516	0.09238	Gm9750
-0.4756	6.087	0.09238	Zfp36l1
-0.4266	4.441	0.09297	Cfap100
0.2462	5.358	0.09303	Aebp2
0.2029	6.355	0.09303	4732471J01Rik
-0.3475	4.358	0.09303	Cnep1r1
-0.7271	3.079	0.09303	4930545L23Rik
-0.3193	6.49	0.09317	Paqr7
0.6975	1.831	0.09345	Gm16267
0.374	4.84	0.09358	Rp9
0.3943	7.27	0.09361	Adgrb1
0.432	4.006	0.09364	Flcn
-0.4547	3.42	0.09387	Scnm1
0.3254	4.919	0.09392	Slc4a7
0.6343	1.937	0.0941	Eno2
-0.1877	9.179	0.0945	Ncoa1
2.063	-0.04955	0.0945	Plppr4
-0.2694	9.617	0.0945	Ddhd1
-0.7899	1.363	0.09454	Gm15337
-0.2201	6.978	0.09454	Cspp1
-0.2943	7.308	0.09472	Crot
-0.1978	7.033	0.09472	Stag2
-0.266	4.667	0.09472	Snw1
-0.3261	3.976	0.09472	Upf1
-0.5322	3.799	0.09472	Atp5mpl
0.7011	1.936	0.09472	Abcb6
-0.254	6.595	0.09485	Rab11fip4
-0.2855	8.404	0.09485	Stard13
-0.521	3.263	0.09485	Gtf3c5
-0.4997	3.006	0.09491	Sesn2
-1.034	0.3689	0.09491	Adarb2
-0.2597	5.605	0.09494	Glod4
0.42	4.535	0.09494	Pou3f4
0.3402	5.178	0.09523	Iars2
0.2661	7.136	0.09562	Plxnb1
0.3754	4.206	0.09562	Ybx3
-0.2503	6.261	0.09562	Cert1
-0.5707	5.32	0.09571	Plp1
-0.9585	0.8277	0.09571	Gng11
0.6799	5.387	0.09578	Ripor2
0.4178	3.68	0.09578	Pm20d1
-0.3081	4.433	0.09585	Tmub2
-0.2824	5.766	0.09588	Kantr
0.36	6.547	0.09596	Gm26843
-0.2951	5.087	0.09634	Mtif2
-0.1975	7.284	0.09634	Ap3b1
0.2609	5.746	0.09634	Plekha1
0.2645	6.268	0.09643	Eif5
-0.2761	5.565	0.09643	Zfp24
0.6554	2.629	0.09645	Car11
-0.3065	4.348	0.0966	Copz1
-0.3054	4.817	0.09667	Dync2i1
0.296	5.084	0.09667	Kdsr
-0.6874	1.532	0.09667	ENSMUSG00000121456
0.3263	4.889	0.09667	Cdc14b
0.2915	5.17	0.09695	Fam102a
-0.3506	4.868	0.09758	Cab39l
0.2772	5.362	0.09758	Anxa5
-0.8977	1.468	0.09758	Zdbf2
0.2982	6.206	0.09801	Cpeb2
0.2351	5.932	0.09819	Sec61a2
-0.2888	4.554	0.09819	Ing3
1.581	-0.6043	0.09819	Gm48610
0.575	2.703	0.09819	Zdhhc16
-0.3248	6.428	0.09819	Dok5
0.1975	8.037	0.09819	Large1
0.5879	5.146	0.09819	Gm4117
0.3597	6.383	0.0983	Swap70
0.5642	3.132	0.0983	Snap91
0.2484	6.186	0.0983	Dtx1
-1.114	1.096	0.0983	Dpysl3
0.4683	3.001	0.0983	Limk1
-0.4969	3.722	0.09907	Ypel3
-0.4003	3.596	0.09909	Fam131a
1.11	7.131	0.09915	Csmd1
0.331	4.236	0.09915	Cmas
-0.3329	4.43	0.09915	Xpnpep3
1.014	1.535	0.09915	Cage1
-0.4523	3.325	0.09915	Bbs1
-0.3084	4.623	0.09915	Zfp110
-0.2573	5.674	0.09915	Pde8a
-0.2155	7.573	0.09915	Ngef
0.2161	6.977	0.09915	Fer
-0.2635	8.303	0.09915	Magi3
-0.3	5.762	0.09921	Gm14858
-2.628	1.91	0.09921	Nr4a2
0.8464	2.486	0.09921	Ptges
0.3451	4.761	0.09921	Adss
-0.7384	1.557	0.09921	Gm33195
0.3547	4.085	0.09925	Ndufb10
-0.2362	6.315	0.09963	Cwf19l2
-0.6079	3.068	0.09992	Neu2
0.2268	6.553	0.1001	Tmem245
-0.1915	9.045	0.1005	Psd3
-0.896	0.575	0.1009	Rpgrip1
-0.3279	4.849	0.1009	Gtf2h2
-0.3688	5.438	0.101	Ralbp1
-1.022	0.3268	0.1011	8030456M14Rik
-0.6312	1.869	0.1013	1500026H17Rik
1.58	0.4734	0.1014	Gm29676
0.2489	5.174	0.1015	Sod2
-0.2145	6.364	0.1015	Atp11a
-0.2757	5.354	0.1017	Dpm1
-0.3677	4.467	0.1017	Midn
-0.5828	2.523	0.1017	Ankrd54
-1.474	-0.01616	0.1017	Pcdha3
-0.6424	3.39	0.1017	A2m
-0.4643	2.886	0.1021	Paf1
0.3319	6.766	0.1022	Foxn2
-0.4475	5.783	0.1022	Bcor
0.4407	7.298	0.1023	Dock7
0.2174	7.356	0.1024	Erbin
-0.2432	9.614	0.1025	Adk
-0.9289	0.5423	0.1025	C430014B12Rik
1.268	0.3133	0.1025	Glyctk
-0.2124	7.369	0.1025	Crtc3
0.554	3.033	0.1025	Zfp58
0.316	5.807	0.1027	Wnt7b
-0.5492	2.399	0.1028	Sdr42e1
1.345	1.116	0.1028	Rims1
-0.5304	2.732	0.1028	Fiz1
-1.38	-0.04003	0.1028	Cdkl2
-0.2763	7.403	0.1031	Sh3pxd2b
-0.2179	6.095	0.1033	Gm9801
0.4741	3.698	0.1035	Tlcd5
0.433	3.548	0.104	6230400D17Rik
0.2627	7.297	0.104	Peak1
-1.06	0.4161	0.104	Armh1
0.51	2.793	0.104	Pecr
1.163	0.2421	0.104	Gm8132
0.7274	1.494	0.104	A830018L16Rik
-0.348	4.562	0.104	G2e3
1.165	0.833	0.104	Ppp1r1a
0.2433	5.165	0.104	Ndfip2
0.3288	6.516	0.104	Eogt
0.2821	4.96	0.104	Nin
-0.4905	2.494	0.104	Prelid1
0.3629	3.543	0.104	Smim13
-0.6067	2.052	0.104	Uaca
1.292	0.1961	0.104	Gm11077
0.7749	9.746	0.104	Fars2
-0.9188	0.576	0.104	1300014J16Rik
0.9062	0.6112	0.104	Piwil2
0.6052	4.346	0.1043	Rpp14
0.5642	3.362	0.1048	Paqr6
-0.3227	5.064	0.1052	Impa1
0.514	3.068	0.1052	Cln8
0.2994	4.688	0.1052	Slc9a6
-0.3936	6.651	0.1052	Frem2
-0.2157	6.866	0.1053	Zc3h12b
-0.5739	3.188	0.1053	Pcdhgb1
0.6392	7.022	0.1053	Nrxn3
-0.3247	5.42	0.1057	Cpne2
-0.2947	5.541	0.1057	Chordc1
-0.6662	3.134	0.1057	Cacna2d3
-0.3435	4.686	0.1062	Nphp1
0.4601	4.835	0.1062	Dmp1
-0.4643	3.008	0.1062	Abhd14a
-0.3203	5.385	0.1062	Polr2a
-0.8898	2.5	0.1062	Duxbl1
-0.4697	3.901	0.1062	Gdf10
-0.2154	6.579	0.1063	Myo1e
-0.2464	6.685	0.1063	A830082K12Rik
-1.097	0.4816	0.1064	ENSMUSG00000120150
0.7052	1.86	0.1065	Taf6l
-0.3227	4.191	0.1067	Oxa1l
0.2855	4.787	0.1067	Idua
0.3105	5.623	0.1067	Macrod1
0.2469	5.741	0.1069	Stk17b
-0.4946	4.45	0.1069	Them4
-0.6204	2.306	0.1069	AI593442
-0.188	6.929	0.1069	Pias2
0.7175	2.363	0.1069	Lzts1
0.4837	3.919	0.1069	Exoc3l4
0.4643	3.876	0.1069	Gpr63
-0.7508	1.756	0.1071	Mettl1
1.385	0.0155	0.1071	Syt1
0.3145	4.465	0.1072	Gpr89
-0.5286	3.641	0.1076	Tnr
1.54	0.01311	0.1076	Tasl
0.3681	3.608	0.1076	Parp16
0.3268	5.854	0.1076	Rps6ka2
0.7258	1.453	0.1076	Itga3
-0.3789	3.323	0.1077	Qsox2
-0.5934	3.52	0.1079	Glipr2
-0.341	4.519	0.1082	H2bc4
0.3054	5.137	0.109	Pola1
0.3803	5.404	0.109	Ephb3
0.6491	2.42	0.1092	Renbp
0.2645	6.826	0.1092	Apbb2
0.8406	1.849	0.1093	Nrep
0.45	3.577	0.1095	Vps16
-2.235	3.043	0.1103	ENSMUSG00000120091
0.3744	4.155	0.1106	Fam8a1
0.4401	3.935	0.1109	Lpgat1
-1.146	0.4354	0.1109	Gm26831
-0.3595	3.551	0.1111	Cep44
-0.3054	4.711	0.1125	Prkag1
-0.5162	2.741	0.113	Cenpq
-0.4641	2.776	0.113	Pet100
0.336	3.814	0.1131	Thap4
-0.2265	6.34	0.1131	Fxr1
0.6727	1.798	0.1135	Gm14827
0.1934	7.313	0.1136	Extl3
-0.8704	1.51	0.1136	Lingo4
-0.5658	2.857	0.1136	Miip
-0.2711	5.154	0.1138	Rbbp5
-0.4157	3.48	0.1138	Rpf1
0.2094	6.462	0.1138	Suclg2
0.6685	2.614	0.1138	Prcp
-0.2717	5.679	0.1141	Nipa1
-0.7585	4.234	0.1142	Gm29521
-0.2557	5.71	0.1142	Tasor2
0.4252	3.158	0.1142	Dvl2
-0.1921	6.856	0.1142	R3hdm2
0.2018	6.316	0.1142	Dpy19l4
1.377	5.233	0.1142	4932438H23Rik
0.3076	4.299	0.1142	Got2
0.3695	4.092	0.1143	Bach1
0.5715	3.489	0.1145	Get3
-0.3693	3.741	0.1149	Isy1
0.3975	4.288	0.1151	Zbtb1
1.462	-0.155	0.1154	Cyp2j13
-0.7275	1.031	0.1155	Tmem198
0.626	2.01	0.1155	Rslcan18
1.13	5.114	0.1155	D030055H07Rik
-0.2083	9.836	0.1155	Nebl
-0.6882	2.059	0.1155	Camk2a
0.5526	6.743	0.1155	Ldlrad3
-0.2031	8.538	0.1156	Gm973
0.406	4.342	0.1157	Tpcn2
-0.1919	7.531	0.1158	Cnot4
1.418	1.536	0.1163	Grik1
0.3243	5.691	0.1163	Wsb1
0.6934	2.665	0.1163	Dnah7c
0.2566	4.83	0.1163	1500004A13Rik
0.1929	7.979	0.1163	Celrr
0.4589	3.979	0.1163	Prdm11
0.3905	4.372	0.1164	Rragc
1.264	0.8007	0.1164	Gm15608
-0.2008	7.349	0.1165	Psme4
-0.2921	5.689	0.1165	Slc39a11
-0.8982	0.4436	0.1165	Coa4
0.4049	4.903	0.117	Ndp
0.5379	3.361	0.117	Tmem35a
1.243	0.3181	0.117	Npcd
0.2373	5.976	0.117	Zdhhc20
0.2674	6.635	0.117	Hk1
-0.3054	4.077	0.117	Tmem214
1.47	1.556	0.117	B230303A05Rik
1.311	0.2703	0.1176	Gm28905
-1.509	4.812	0.1176	Irs2
-0.235	7.765	0.1176	Phkg1
0.2416	6.157	0.1176	Tm9sf3
0.2457	4.782	0.1177	Spg7
0.2645	5.375	0.1177	Gm20517
0.2479	6.738	0.1179	Gna12
0.2207	6.653	0.1179	Nufip2
0.4068	4.427	0.1179	Zdhhc18
-0.2925	5.346	0.1179	Tmf1
0.5277	2.774	0.118	Il10rb
-0.2321	6.108	0.118	Mid2
-0.2854	4.65	0.1182	Pi4k2a
-0.872	0.54	0.1184	Gm32950
-1.05	0.4833	0.1184	Mroh5
-0.2445	5.443	0.1184	Zfp398
-0.2413	8.27	0.1186	Atp13a4
-0.4433	3.461	0.1187	Rfng
-0.3837	5.202	0.1189	Cxxc5
0.2037	5.923	0.1189	Asxl1
-0.8454	1.711	0.1191	Dmc1
-0.2762	4.992	0.1191	Cox6c
0.4759	2.532	0.1191	Hic2
-0.2662	5.544	0.1191	Gpatch1
0.8652	1.272	0.1194	Gm30085
0.2358	6.362	0.1194	Ramp1
0.3	5.985	0.1201	Dapk1
0.353	4.729	0.1201	Wdr91
0.35	4.654	0.1201	Txnrd1
0.3888	3.616	0.1205	Nol8
0.5825	8.56	0.1205	Hdac9
0.5979	3.824	0.1205	Acat2
0.2492	4.905	0.1205	Crtc1
0.3406	4.718	0.1205	Rnf141
0.2828	4.596	0.1207	Prkci
-0.301	5.043	0.1207	Emc8
-0.501	2.938	0.1207	Snhg20
0.407	3.666	0.1209	ENSMUSG00000121479
-0.748	3.048	0.1211	Ahnak
-1.149	1.351	0.1211	Abca6
-0.2323	6.698	0.1211	Pibf1
0.4904	3.359	0.1214	Zfp112
-1.078	-0.05303	0.1218	Gm38804
-0.9719	5.865	0.1218	ENSMUSG00000095041
0.2493	7.581	0.1219	Sox2ot
-0.3364	4.001	0.1223	Arl6
0.3159	4.839	0.1223	Atp6ap1
-0.2479	6.018	0.1224	Rps6kc1
-0.3559	4.046	0.1224	Tspan32os
0.3037	4.259	0.1224	Pip4k2b
0.2556	8.524	0.1224	Pik3r1
-0.3507	4.237	0.1224	Ramp2
-0.45	8.012	0.1224	Epas1
-0.5925	3.377	0.1224	Smarcd2
-0.293	7.827	0.1224	Eda
0.2583	5.253	0.1224	Sipa1l1
-0.2022	6.302	0.1224	Kifap3
0.3033	4.427	0.123	Gucy1b1
1.247	0.6034	0.123	Gm14061
-3.991	1.618	0.123	4930481A15Rik
-0.368	3.191	0.1236	Pigo
0.2413	6.2	0.1242	Ctso
-0.4633	2.662	0.1242	Zc3h11a
-0.2841	4.584	0.1242	B230219D22Rik
0.2685	5.168	0.1242	Gstz1
0.2556	5.238	0.1242	Laptm4b
0.5248	3.355	0.1246	Ubtd1
-0.4023	3.131	0.1246	Gm36975
1.382	-0.05129	0.1246	Gm26854
0.6889	1.943	0.1246	Gm31036
0.6499	2.025	0.1246	Pola2
-0.228	4.911	0.1246	Slc35a5
-0.2294	7.033	0.1246	Arid4b
-0.3245	3.717	0.1249	Rps23
-0.2916	5.106	0.125	Pex2
0.4683	3.17	0.125	Igip
1.032	0.7556	0.1251	Gm14393
0.2146	7.021	0.1251	Rai1
0.7954	2.267	0.1256	Gm43666
0.4376	6.121	0.1256	Epha4
0.3915	3.493	0.1257	Zfp597
-1.067	0.6963	0.1257	A930006K02Rik
-0.2716	7.285	0.1257	Zfp516
-0.2249	5.617	0.1257	Nipsnap2
-0.5828	3.228	0.1258	Zc3hav1
0.273	5.907	0.1258	Gls
-0.1783	8.523	0.1261	Gramd3
0.2314	6.97	0.1262	Fnip1
-0.871	1.087	0.1263	Hsf5
-0.2688	6.024	0.1268	Gm37679
-0.873	1.024	0.1268	Iqub
-0.4312	2.829	0.1268	Zscan12
0.3676	3.746	0.1268	Ercc8
0.262	5.092	0.1268	Dcun1d2
0.1848	8.698	0.1268	Ptprm
0.2673	5.278	0.1268	Trpc1
1.168	0.09313	0.1269	B430319H21Rik
-0.5467	2.424	0.1269	Smyd1
0.2576	5.221	0.1269	Ggact
0.2742	5.719	0.127	Slc25a5
0.2207	8.851	0.127	Glud1
-1.341	0.6343	0.127	Fam167a
-0.3478	3.723	0.127	Rmc1
-0.1993	6.625	0.1274	Ndufs4
0.3289	7.879	0.1274	Arhgap26 - ENSMUSG00000118193
-0.3108	3.81	0.1276	Tmem14a
0.3188	4.481	0.1286	B3galnt2
-0.2113	6.24	0.1286	Amotl1
-0.3784	3.93	0.1286	ENSMUSG00000120451
-0.3729	4.432	0.1287	Smpd3
-0.179	7.862	0.1287	Akap9
-0.6701	1.979	0.1288	AV099323
0.4268	3.325	0.129	Gpc1
0.4981	2.619	0.1292	Ajm1
0.2066	7.45	0.1296	Rasa3
1.546	0.7132	0.1296	Lratd1
1.705	-0.7155	0.1297	Lipg
0.8813	1.57	0.1297	Gm26839
0.609	1.889	0.1297	Thnsl2
-0.4828	4.786	0.1299	Fabp5
-0.1772	7.566	0.131	Gk
0.2607	4.671	0.1311	Socs6
0.4041	4.733	0.1311	Ednra
-0.249	5.393	0.1311	Gabpb2
0.6073	1.949	0.1311	Dtwd1
0.4677	2.975	0.1311	Mtrr
-0.4249	3.057	0.1311	Wdr73
0.2129	5.714	0.1311	Pcmt1
-0.222	6.803	0.1311	Ptpn12
-0.6574	1.891	0.1311	Tmem63a
0.2911	4.726	0.1311	Wdr59
-0.4775	3.435	0.1311	C630043F03Rik
-0.7421	1.195	0.1313	2810428J06Rik
0.5975	3.021	0.1318	Nol4l
-0.7097	1.581	0.1318	A730091E23Rik
0.3623	3.619	0.1318	Ebpl
0.3642	3.397	0.1318	Ubxn8
-0.814	4.059	0.1318	Vit
-0.3647	3.056	0.1318	Rps29
-0.7252	1.195	0.1321	ENSMUSG00000120906
-0.7228	1.751	0.1324	Fam169a
-0.451	2.759	0.1326	B230104I21Rik
0.2547	7.615	0.1326	Ttc3
-0.2825	4.172	0.1326	Poc5
0.357	4.965	0.133	Fgfrl1
-0.6597	2.167	0.1333	Cd164l2
0.3492	3.944	0.1333	Aga
0.2099	7.608	0.1333	Elp4
-0.1758	7.202	0.1333	Cep350
1.257	-0.1946	0.1333	Pde1b
-0.2727	5.038	0.1333	Pcbp1
0.2858	5.275	0.1336	Klhl13
-0.9297	0.6808	0.1336	Gm10558
-0.418	3.044	0.1336	Pnp
-0.2854	7.932	0.1338	Msmo1
0.4798	3.286	0.1338	2310014F06Rik
-0.6857	1.521	0.1342	9530052C20Rik
1.256	5.059	0.1342	Grm5
0.8081	0.9612	0.1353	Phf19
0.8032	1.898	0.1353	Sh2d4b
-0.4847	3.119	0.1353	Bbs5
-0.8753	2.779	0.1353	Apobec1
-0.6405	1.865	0.1353	Gm31224
0.3076	4.468	0.1353	Tmpo
0.4989	3.66	0.1353	Flvcr1
1.047	1.64	0.1355	Svep1
0.6481	1.718	0.1355	Gm37876
0.2162	7.981	0.1355	Prkce
-0.2327	6.259	0.1355	Xpo1
-0.4733	10.48	0.1357	Acsl3
-0.3006	5.672	0.1357	Wars2
-0.2969	7.271	0.1357	Pdia3
0.2446	7.1	0.1359	Rtn4
-1.265	7.706	0.1359	Gm40578
-0.4866	3.786	0.1362	Tdg
-0.4279	2.585	0.1365	Gm27017
-0.2274	5.5	0.1365	Herpud2
0.8461	3.482	0.1366	Gm2164
-0.282	7.438	0.1369	Plcd4
-0.4784	3.117	0.137	Creld1
0.3891	3.916	0.1372	Alas1
0.2367	7.524	0.1375	Abtb2
-0.1928	8.625	0.1375	Megf10
0.2647	5.308	0.1375	B3galt5
-0.3651	3.517	0.1375	2810013P06Rik
0.3708	4.614	0.1375	Mir670hg
1.224	-0.06643	0.1376	Gm35110
0.5774	2.236	0.1382	Gm28305
0.3448	3.948	0.1382	Klf6
-0.2025	5.802	0.1382	Scfd1
0.2625	6.724	0.1382	Cyp2j6
0.1729	6.697	0.1382	Pkd2
-0.3105	6.226	0.1382	Nr2e1
0.2523	4.806	0.1382	Crbn
0.5878	3.628	0.1382	Heyl
-0.2923	4.67	0.1388	Sec23b
-0.4781	2.409	0.1388	Ttc32
1.62	0.3434	0.1388	2700089I24Rik
0.2503	4.929	0.1388	Mfap3
-0.2575	5.199	0.1388	Wdr47
-0.7257	3.202	0.1388	5730522E02Rik
-0.201	6.406	0.1388	Zfp280c
0.3355	4.77	0.1388	Cttnbp2nl
-0.2869	5.015	0.1388	Asb8
-0.2129	7.169	0.139	Gbf1
1.107	0.157	0.139	Trac
-1.037	0.4167	0.139	1700041G16Rik
-0.6194	2.138	0.1393	Nexn
0.6461	1.599	0.1394	Slc23a4
-0.3258	4.578	0.1398	Ttll7
0.349	3.931	0.1401	Gm32834
0.8273	1.081	0.1401	Nhp2
0.3468	4.176	0.1401	Sh3glb2
0.4594	3.187	0.1401	Arpin
-0.436	5.185	0.1401	Cep112
-0.2266	5.671	0.1401	Arf4
-0.1987	6.712	0.1401	Nr1d1
0.5901	4.955	0.1401	Gm44593
0.5008	2.27	0.1401	Gm49171
3.583	0.6689	0.1401	Gm48605
-0.4167	3.049	0.1401	Ss18l2
-0.7396	1.572	0.1401	9630013D21Rik
0.2194	5.348	0.1402	Aifm1
0.216	5.59	0.1402	Comt
0.9028	0.4577	0.1402	Fbxo5
0.6188	1.688	0.1402	Armcx1
-0.2879	4.309	0.1406	Hdgf
0.3835	3.784	0.1406	Lrrc75a
-1.013	0.2065	0.1408	Klhl41
0.2649	7.85	0.1409	Epc1
0.2457	5.606	0.1409	Ptp4a2
-0.5538	6.576	0.1409	Synpo2
0.8971	0.2848	0.141	Gm46332
-0.2443	7.642	0.141	Ncor2
0.378	4.119	0.1411	Slc17a5
-0.7598	1.576	0.1411	Rhbdl2
-0.2007	6.467	0.1412	Nek1
0.2022	5.847	0.1412	Cdc42bpb
0.8561	8.699	0.1412	Efr3b
0.8177	4.842	0.1415	Lhfpl3
0.5309	3.503	0.1415	Adamts12
0.4529	6.486	0.1419	Phf21b
-0.2654	6.121	0.142	Dlg4
-0.3424	5.353	0.142	Tmem94
0.376	3.541	0.142	Lactb
-0.5976	2.373	0.142	Tomm22
-0.3591	3.381	0.1423	Atf6b
-0.6382	1.579	0.1427	Pgap6
-0.9361	0.2909	0.1428	Fam217a
-0.2087	6.585	0.1428	Id2
0.445	3.67	0.1435	Plekha6
-0.3727	2.992	0.1435	Gm48737
-0.5004	3.195	0.1435	D2hgdh
-1.015	0.08745	0.1437	Gm47003
-0.3014	6.494	0.1438	Parp8
1.151	0.2566	0.1438	Gm19705
0.3333	5.102	0.1438	Ano10
0.2975	4.43	0.1438	Rab34
-0.2385	5.432	0.144	Pdss1
-0.9017	0.308	0.1443	Adgb
-0.6617	1.506	0.1443	Phf2os1
-0.3765	3.551	0.1447	Drap1
-0.1935	6.698	0.1451	Ube2b
1.121	0.1791	0.1452	Zfp114
-0.7644	1.189	0.1452	Dnah2
0.3227	3.96	0.1452	Myo19
-0.7754	2.039	0.1452	Scn2a
-0.3819	3.325	0.1452	Rtca
0.3755	4.184	0.1452	Cnbd2
-0.3592	3.358	0.1453	Rpl41
-0.4783	2.24	0.1453	Ercc1
-0.5933	2.11	0.1462	Gm20528
0.2465	5.633	0.1465	Slf2
-0.2303	9.375	0.1465	Mapk10
-0.4574	5.616	0.1465	Hip1r
0.9127	0.913	0.1466	Slc25a13
0.7101	1.728	0.1466	Gm53058
-0.7343	2.654	0.1466	Opcml
0.3438	4.016	0.1466	4930523C07Rik
0.2082	5.392	0.1467	Rab40c
-1.129	0.4122	0.1469	Pgm5
-0.1764	9.527	0.1469	Sox5
0.2585	5.713	0.1469	Dzip1
1.062	0.3413	0.1472	Cdrt4
0.3751	7.767	0.1473	Grin2b
-0.1666	9.808	0.1474	Dlgap1
0.3056	4.338	0.1477	Erlin2
-0.6771	1.374	0.1477	Kif9
0.3857	3.741	0.1477	Acvr2b
-0.8571	1.135	0.1479	Mfsd6
-0.7665	0.4159	0.1482	Faah
-0.2794	6.682	0.1483	C030018K13Rik
-0.5715	1.936	0.1483	ENSMUSG00000120362
0.5709	2.539	0.1483	Dnah14
-0.316	4.029	0.1483	Etfrf1
-0.2085	5.225	0.1483	Brk1
-0.7834	3.198	0.1483	Rsph3b
-0.5701	2.978	0.1484	Spink10
-0.611	1.89	0.1484	Avil
-0.3725	7.659	0.1484	Pcdh11x
-0.9227	0.7448	0.1484	Drc1
0.623	2.651	0.149	Tmie
0.7985	1.187	0.1491	Frmpd1os
-0.3011	5.252	0.1498	Stk40
0.2872	6.357	0.1499	Atp5pb
-0.2136	7.394	0.15	Pcdhgc4
0.3273	5.034	0.15	Lrrn2
-0.1902	5.751	0.1504	Brd8
-0.2017	6.159	0.1505	Fez1
0.6612	1.764	0.1507	A230108P19Rik
-0.3075	5.021	0.1508	Stip1
0.4131	3.38	0.1517	Xpc
0.9034	5.784	0.1519	Slc35f1
0.9999	0.2081	0.1519	H3f3a-ps2
0.2125	6.477	0.1521	Acadl
-0.5376	1.916	0.1524	Gm37008
0.9919	1.43	0.1525	4930593A02Rik
-1.189	0.06516	0.1532	6530437J22Rik
-0.2386	5.021	0.1532	Gm41077
0.2145	6.141	0.1536	Arap1
-0.2432	5.076	0.1536	Ik
0.589	1.977	0.1538	Armc7
-0.3274	4.086	0.1539	Eml1
-0.1917	6.924	0.1539	Tef
-0.3282	4.192	0.1539	Cript
-0.2328	5.862	0.1539	Taf1
-0.6105	3.006	0.154	Cacnb4
0.1783	7.727	0.154	Aox1
0.9395	0.6353	0.154	Gm38134
-0.8528	0.5243	0.1545	Pabpc5
0.3451	4.153	0.1546	Pus7
1.192	1.787	0.1547	Bcl2l15
0.1686	7.19	0.1549	Mdm4
0.4375	4.59	0.1551	B2m
-0.2566	4.773	0.1551	Itgb3bp
0.2392	5.578	0.1551	Glmn
0.2029	5.955	0.1551	Aco1
-0.407	2.591	0.1556	Zfp963
-0.8757	1.074	0.1556	Ube2d-ps - ENSMUSG00000121496
-0.3342	5.663	0.156	Ap3m1
-0.7695	1.414	0.1566	Fbxw17
-0.3158	3.843	0.1568	Cbarp
0.5775	2.229	0.1568	Kbtbd8
0.2673	4.984	0.1568	Echs1
1.043	0.7113	0.1568	Itga2
0.6233	4.187	0.1569	Galnt10
-0.2308	5.487	0.1577	Slc33a1
-0.1937	5.74	0.1578	Sarnp
-0.4241	2.516	0.1578	Gadd45gip1
0.9876	0.7379	0.1579	Gnal
0.4182	3.866	0.1579	Mars2
0.8679	0.5467	0.1583	Tmem108
0.6889	1.438	0.1583	Ogg1
0.1736	6.779	0.1583	E2f3
0.2902	3.838	0.1586	Utp18
0.458	2.374	0.1589	Snhg4 - ENSMUSG00000117694
-0.2088	8.432	0.1589	Fgd6
0.1891	5.842	0.1589	Cul4a
-0.177	6.019	0.1595	Ndufv2
-0.1907	9.873	0.1595	Fgfr2
-0.1837	6.996	0.1599	Tnks
-0.2658	5.765	0.1599	Shisa4
0.2951	5.445	0.16	Sdc3
0.4021	4.389	0.1601	Ucp3
1.579	0.2273	0.1603	Fgd2
-0.3437	3.884	0.1606	Dnai4
0.3063	4.853	0.1606	Itga7
-0.1957	9.156	0.1606	Clasp2
-0.3631	3.785	0.1606	BC065397
-0.4938	2.968	0.1606	Fbxo41
-0.1798	9.5	0.1607	Dennd1a
-0.7196	2.097	0.1607	Tmem231
0.9089	4.778	0.1608	Ppp1r14c
-1.07	0.5509	0.1614	Sgsm1
0.2204	6.272	0.1614	Golm2
0.1839	6.704	0.1614	Kif16b
-0.6586	1.136	0.1617	Cdca7
0.4365	3.046	0.1618	Tmem11
-0.287	4.358	0.1618	Galk2
0.2474	4.715	0.162	Guf1
-0.3363	4.731	0.162	Rpgrip1l
-0.1682	8.649	0.162	Arhgef4
0.1879	6.382	0.162	Rasa1
0.2335	7.252	0.162	Tmc7
0.2008	9.02	0.162	Mgll
-0.3939	4.595	0.1621	Mrps27
-0.1751	6.685	0.1622	Golga4
-0.6358	2.356	0.1622	Lrrc2
0.4018	3.965	0.1622	Adora2b
1.16	5.054	0.1624	Nrg1 - ENSMUSG00000062991
-0.2405	8.415	0.1631	Tle4
0.7222	1.838	0.1632	Prdm9
0.3927	3.188	0.1637	Spata24
-0.5053	2.025	0.1638	ENSMUSG00000121500
-0.4079	2.768	0.1638	Ap5z1
-0.2179	5.902	0.1638	Rbl2
0.1673	10.92	0.1639	Syne1
0.3084	4.28	0.1639	Tbc1d2b
0.2608	5.076	0.1642	Ints6l
-0.7438	1.09	0.1642	9030407P20Rik
0.2222	5.199	0.1642	Atp6ap2
-0.2058	7.026	0.1646	Crim1
-0.2638	4.721	0.1646	Smarce1
-0.2762	9.286	0.1648	Tenm3
-0.3134	5.029	0.1651	Afap1l2
0.4318	3.887	0.1651	Lurap1
0.2228	6.384	0.1657	2900052N01Rik
-0.4759	2.157	0.1657	Ddx20
0.3104	4.164	0.1657	Znhit6
-0.3937	3.383	0.1657	Syde2
-0.4899	8.127	0.1658	Dach1
0.1813	6.76	0.166	Asah1
-3.762	1.819	0.166	Nr4a3
0.3286	3.933	0.1661	Pgrmc1
0.3926	3.41	0.1661	Mrps14
0.2761	7.252	0.1662	Samd4
0.4915	2.974	0.1665	Cmtm6
-0.2342	5.192	0.1665	Dcun1d5
-0.1907	7.107	0.1665	Gmds
0.1765	6.774	0.1665	Kdm3b
0.2228	5.002	0.1665	Sfi1
0.2326	7.028	0.1665	Plekha7
0.4055	2.799	0.1665	Zfp973
-0.2107	5.89	0.1665	Dnajb6
1.38	1.051	0.1665	Sycp2l
0.4719	3.185	0.1665	Lbr
0.4029	2.93	0.1665	Arl2
-0.6122	1.83	0.1665	ENSMUSG00000120012
-0.7821	1.245	0.1668	A030001D20Rik
0.3044	5.204	0.1668	Zbtb41
0.4552	2.71	0.1668	Gm48512
0.8065	1.28	0.1668	Adcy10
0.805	1.149	0.1669	Gm45820
-0.2369	5.576	0.1669	Pphln1
-0.2621	4.624	0.1669	Pcdhga9
-0.3406	4.286	0.1669	Bpnt1
1.172	0.2444	0.1669	Gm17767
-1.002	0.3112	0.1672	Lrrc23
0.4534	3.591	0.1673	Zkscan2
1.029	0.2869	0.1674	Gm30093
0.2317	5.035	0.1676	Wdr1
0.2487	4.65	0.1677	Zfp799
-0.968	-0.129	0.168	Gm48529
0.272	4.137	0.168	Dnajc21
-0.5218	2.594	0.1681	D330050G23Rik
0.1851	5.784	0.1682	Ndst1
-1.217	3.442	0.1682	Slc38a1
0.2146	8.454	0.1682	Ccdc85a
0.2642	4.71	0.1682	Myh10
-0.1904	8.258	0.1684	Tmcc1
-0.26	5.833	0.1684	Clip3
-0.7995	0.4382	0.1684	Gm20544
0.5198	5.919	0.1689	Klhdc7a
0.2373	5.322	0.1689	Bcap29
0.3457	3.984	0.1689	Syngr1
-0.8866	0.2037	0.1689	Gm37459
0.6325	2.352	0.1689	6820408C15Rik
-0.5402	2.275	0.1689	Fhdc1
-0.3347	8.778	0.1689	Ddah1
0.6184	1.928	0.169	Grid2ip
-0.1617	7.311	0.169	Trip11
0.3466	3.149	0.1691	Lrrc42
-0.5662	2.208	0.1691	2210016F16Rik
-0.3525	3.601	0.1691	Hdx
0.6512	1.753	0.1691	Peli3
-0.2075	6.331	0.1696	Hmgb1
0.2396	5.976	0.1696	Tmem229a
0.622	4.548	0.1697	Spats2l
-0.2478	6.432	0.17	Plekhm3
0.307	9.534	0.17	Mfge8
0.9745	0.2582	0.17	Gm40617
0.2782	4.338	0.1701	Hebp1
0.1724	6.478	0.1701	Ttc7b
-0.4807	2.152	0.1701	Tomm6
0.6162	5.9	0.1701	Ttc39c
-0.2861	4.716	0.1701	Myef2
-0.1769	6.147	0.1701	Sec14l2
-0.4308	2.897	0.1701	Rsph9
0.6259	2.551	0.1701	Bend5
0.4036	5.017	0.1701	Cux2
1.332	-0.08315	0.1701	ENSMUSG00000121413
0.2995	4.205	0.1701	Gm14399
0.2172	5.354	0.1702	Cers5
1.71	-0.2549	0.1702	Slc12a5
-0.504	1.953	0.1702	Serpinb9
0.1708	8.072	0.1702	Kif1a
0.472	2.459	0.1703	Txnl4a
0.2134	7.157	0.1703	Mapt
0.1791	7.74	0.1703	Hnrnpu
0.4354	4.11	0.1703	Zfp976
0.2557	5.262	0.1704	Eci1
-0.6848	1.505	0.1707	Shank3
-0.382	2.943	0.1708	Rabif
-0.8754	0.3059	0.1711	Gm20548
0.2125	8.104	0.1715	Nr3c1
-0.8318	0.809	0.1716	Gm30238
0.232	6.962	0.172	Mef2a
0.4833	2.589	0.172	Gm30655
-0.2171	5.906	0.1724	Etv1
-0.1695	6.514	0.1729	Nrd1
0.2183	6.207	0.1729	Cep170
-0.2396	5.284	0.1729	Ccdc191
-0.3679	3.113	0.173	Spryd3
-0.2462	5.396	0.173	Dbt
0.6949	4.18	0.1731	Kazn
-0.1921	5.738	0.1731	Os9
-0.1737	7.219	0.1731	Aopep
-0.3901	2.793	0.1733	Slc39a3
-0.2115	5.211	0.1733	Fgfr1op2
0.2492	4.536	0.1733	Gm20431
-0.2428	6.133	0.1733	Tmem241
-0.258	4.132	0.1733	Zfp518a
-0.4421	2.703	0.1733	Ccdc137
0.4226	3.004	0.1733	Gm26549
0.2225	9.34	0.1736	Fut9
0.3921	5.286	0.1738	Gm6277
0.1925	7.95	0.1744	Rabep1
-0.2834	3.832	0.1747	Gtf2f1
-0.4494	2.559	0.1747	Mxra7
0.3849	2.709	0.1749	Gm13110
0.5519	2.054	0.1749	Zfp810
-0.4542	2.551	0.1749	Katnb1
-0.3313	4.4	0.1752	Mfsd8
-0.1621	6.875	0.1752	Xrn1
-0.2567	6.825	0.1752	Pdcd4
0.1741	6.961	0.1752	Ahdc1
0.3577	3.226	0.1752	Dhrs7b
-0.3236	3.857	0.1752	Bin3
-0.2676	4.984	0.1754	Cacna2d2
-0.3647	3.228	0.1754	Nit1
0.1918	5.65	0.1754	Slc22a17
0.4823	7.185	0.1754	Plxdc2
0.399	5.482	0.1756	Prkag2
0.2284	7.102	0.1758	Gstm1
0.4824	5.637	0.176	Nat8f3
0.1892	5.878	0.1762	Fbxl4
-0.6607	1.516	0.1762	Prkar1b
0.2068	6.434	0.1762	Ccdc136
0.1952	6.496	0.1765	Hlcs
0.8045	0.834	0.1765	Gm13267
-0.689	0.7744	0.1765	Gm48952
0.2122	5.666	0.1766	Adck1
0.1781	7.952	0.1766	Gabrg1
-0.244	4.493	0.1766	Poldip3
-1.482	-0.05412	0.1766	Gad1
-0.261	4.284	0.1766	Rbm12
-0.1826	5.451	0.1773	Exoc3
-0.225	4.775	0.1773	Mark4
0.3779	5.067	0.1775	Parvb
0.5887	1.819	0.1782	Tmem86a
0.2364	4.699	0.1782	Npr2
-0.6319	1.65	0.1782	Gstt3
0.3641	3.778	0.1782	Mfsd1
0.3468	3.467	0.1783	3830408C21Rik
-0.4437	7.301	0.1783	Cmip
-0.671	1.451	0.1783	Id1
[truncated: 55,011 more rows]

## Sheet: DE-1_Astrocyte
logFC	AveExpr	p_val_adj	gene_names
7.459	3.923	0.002869	Gm48606
6.539	0.8385	0.01346	Gm49692
5.78	0.5181	5.835e-07	Gm6166
4.701	-0.002099	6.242e-05	Cacng6
4.657	-0.08507	6.242e-05	Gm40847
4.634	1.058	5.752e-05	Cfap77
3.709	1.351	0.04344	4930519F16Rik
3.109	2.145	0.01316	Gm36372
2.81	2.332	0.0005397	Trpc3
2.56	3.682	0.01137	ENSMUSG00000121307
2.469	1.575	0.009277	Gm45650
2.449	2.22	0.000115	Pcdh18
2.444	2.189	0.002413	Gm42196
2.416	0.8758	0.01279	Acot12
2.218	2.539	0.0007472	Slco3a1
2.161	1.085	0.01886	Scml2
2.149	3.598	0.0004069	4930447K03Rik
2.083	1.79	0.00224	Gm18103
2.009	3.421	7.351e-05	B230206L02Rik
1.973	1.041	0.03092	Zc3hav1l
1.888	2.635	0.012	Rsad2
1.799	2.356	0.004402	Gm47071
1.752	1.825	0.01085	Ptpn5
1.743	2.584	0.007548	Gm960
1.734	4.078	1.026e-05	Creb5
1.708	0.8339	0.02311	Gm49064
1.683	7.584	0.02206	Rbms3
1.68	2.006	0.009277	Rab3b
1.608	2.37	0.0251	Dclk3
1.561	4.844	6.497e-06	Zfp729a
1.55	1.67	0.03554	Pvr
1.543	1.648	0.02251	Adgrf2
1.539	2.826	0.003986	Gm43439
1.532	1.362	0.0443	Gm30524
1.504	2.356	0.01085	Cd44
1.487	3.863	0.03619	Gm45455
1.473	1.496	0.04202	Cdc25a
1.423	2.17	0.01597	Gm10138
1.37	4.885	5.913e-05	Jag1
1.366	2.244	0.012	Catsper3
1.326	4.086	0.00148	Adamts1
1.309	2.194	0.04209	Lzts1
1.306	3.514	0.00803	Inka2
1.296	4.391	0.03324	Hhipl1
1.259	3.594	0.001502	Gm47469
1.226	2.867	0.01445	Bbs12
1.215	5.804	0.007198	Fam184b
1.204	1.979	0.02732	Rgs17
1.202	1.929	0.03157	Gm45786
1.198	7.512	0.0003023	Ptchd4
1.196	2.256	0.02324	Tsku
1.176	3.564	0.001633	Sema5b
1.174	5.035	0.004848	Brinp2
1.159	2.802	0.02031	F830045P16Rik
1.157	2.432	0.01704	B230303O12Rik
1.15	2.33	0.03888	Zfp457
1.143	3.995	0.00148	Sh3rf3
1.141	5.904	1.262e-05	Tmem51
1.139	4.634	0.0006485	Nrg1 - ENSMUSG00000062991
1.138	3.654	0.002336	D630045J12Rik
1.135	4.1	0.004071	Cox7b2
1.134	2.138	0.02617	Zfp811
1.133	2.981	0.02667	Smyd2
1.129	3.514	0.004318	Rarres2
1.123	3.683	0.01316	Shisa6
1.092	4.398	0.001127	Fhod3
1.09	7.17	0.04486	Grip1
1.068	3.905	0.002556	Bcas1os2
1.066	3.913	0.009102	Sfmbt2
1.065	3.978	0.001111	Mmd
1.063	4.19	0.003986	Gm1604a
1.058	3.342	0.01497	Gmpr
1.038	5.778	0.0006596	Dok6
1.035	3.931	0.004169	Tox3
1.012	4.752	0.001653	Gm49342
0.9962	4.952	0.02629	Grm5
0.9875	4.072	0.006591	Septin6
0.9869	3.323	0.02914	Tmem35a
0.9809	5.95	9.257e-05	Hgf
0.9729	5.139	8.48e-05	F730043M19Rik
0.9567	4.341	0.01316	Dgkh
0.9472	6.425	1.857e-05	Rhobtb3
0.9347	4.634	0.001145	Pxdn
0.9304	7.685	0.0001298	Neat1
0.9288	5.082	0.0009759	Nox1
0.9151	3.085	0.02553	Adamts3
0.9112	3.546	0.01737	Car5b
0.9046	4.542	0.003161	Catspere2
0.8969	6.062	0.0137	Tnfaip8
0.8661	4.748	0.012	Ror1
0.8653	3.71	0.03677	Gm20083
0.8618	5.627	0.0001446	Pkia
0.8503	6.795	0.01346	Epha5
0.8479	4.879	0.003262	Bzw2
0.8391	6.84	7.643e-05	Nme7
0.8374	3.542	0.02678	Pla2g12a
0.8347	4.305	0.006292	Gdpd2
0.8309	5.349	0.009911	Gm45708
0.8272	4.001	0.005341	AW011738
0.8249	5.764	0.008455	4930544I03Rik
0.8121	5.84	0.000718	Car8
0.8104	6.791	0.0002571	Adra1a
0.7996	5.897	0.0005604	Gm20646
0.7984	6.025	0.0005762	Ppp1r21
0.7937	5.698	0.0008964	Gm5820
0.7929	3.904	0.04852	E430024P14Rik
0.7906	5.448	0.0005397	Tfrc
0.7906	5.52	0.00224	Plxna2
0.7902	4.578	0.004477	Fah
0.782	7.306	0.01088	Gm26512
0.7709	4.973	0.003892	Larp1b
0.7709	4.182	0.0201	Csmd2
0.7653	6.309	0.03144	Gabrg3
0.7647	6.388	0.0009463	Igfbp2
0.7628	4.2	0.02445	2610316D01Rik
0.7537	4.27	0.02106	Pcdhgb7
0.7502	4.706	0.0251	Hacd1
0.7442	3.707	0.02445	4930523C07Rik
0.7407	6.27	0.004071	Hectd2os
0.7295	5.837	0.02324	Epha4
0.7294	9.068	0.0009912	Sema6d
0.7274	3.425	0.04241	Cnr1
0.725	4.422	0.02031	Notch3
0.7236	5.966	0.004402	Syne2
0.7227	9.571	0.04781	Fgf14
0.7168	3.966	0.02139	Ncs1
0.7159	5.058	0.003425	Pcdhga12
0.703	4.42	0.02347	Lhcgr
0.6865	5.924	0.00803	Trib2
0.6776	3.758	0.04536	3010001F23Rik
0.6761	7.415	0.01982	9530026P05Rik
0.6732	4.838	0.009814	Ankmy2
0.6682	4.192	0.02871	Zfhx2os
0.666	5.728	0.02426	Igsf21
0.6653	4.551	0.01704	Tor3a
0.6611	7.8	0.03578	Itih3
0.66	5.16	0.03554	Nopchap1
0.6571	4.596	0.008701	9330179D12Rik
0.6569	4.647	0.01982	Angpt1
0.6559	4.778	0.007198	Mblac2
0.6524	7.557	0.03384	Unc5c
0.6515	8.052	0.001694	Mfap3l
0.6398	4.234	0.03248	Slc25a27
0.6365	3.953	0.03619	P4htm
0.6298	3.979	0.04218	Vegfd
0.6223	4.471	0.02734	Gm16499 - ENSMUSG00000108175
0.6201	5.231	0.02183	Ripor2
0.6159	5.88	0.01346	Stau2
0.6156	6.449	0.01401	Ldlrad3
0.6107	5.471	0.01872	Hs3st3a1
0.5959	4.471	0.02816	Tanc1
0.5938	10.13	0.006948	Lrp1b
0.5912	5.213	0.02031	Amph
0.5869	4.525	0.03874	Cbr3
0.5821	5.096	0.01174	Tpgs2
0.5812	5.466	0.04241	Nat8f3
0.5753	4.963	0.01316	Fut10
0.5673	4.936	0.01529	Dcun1d2
0.5658	4.599	0.02031	Mical1
0.565	6.24	0.02251	Slc6a9
0.5627	7.703	0.00224	Chst11
0.5612	7.697	0.002373	Fgf12
0.5547	4.561	0.03025	Cstf2
0.5515	6.306	0.01982	Septin11
0.5458	6.169	0.01982	Snx12
0.54	5.32	0.01556	Ndufaf2
0.5383	6.439	0.004793	Elovl2
0.536	7.989	0.01245	Lyrm4
0.5331	6.674	0.01737	2210408I21Rik
0.5327	7.473	0.04795	Arhgap26 - ENSMUSG00000118193
0.524	8.38	0.002497	Xpr1
0.5232	5.841	0.01003	Hnrnpdl
0.5189	5.19	0.01981	Gstz1
0.5187	5.893	0.00911	Focad
0.5155	5.141	0.02154	Ap5m1
0.5139	5.042	0.01628	Ano10
0.5123	5.609	0.02043	Mpzl1
0.5089	9.398	0.009403	Il1rapl1
0.5054	6.025	0.02334	Rnf24
0.5028	7.377	0.008935	Tmem178b
0.5016	6.255	0.02154	Gabra4
0.4806	5.831	0.01236	Tom1
0.4794	8.369	0.02155	Kcnj10
0.4787	4.82	0.02871	Ccdc82
0.4737	6.666	0.03498	Foxn2
0.4715	5.523	0.04129	Gm45847
0.4688	7.221	0.0329	Sugct
0.4682	7.033	0.02031	Zfp423
0.4679	6.7	0.02096	Rnf144a
0.4673	7.364	0.0251	Stt3b
0.464	5.461	0.03677	Trim24
0.4564	6.706	0.01085	Ece1
0.4561	8.64	0.006987	Astn1
0.4558	6.413	0.02106	Apbb2
0.4541	5.269	0.04895	Ctps2
0.454	5.505	0.04953	Mipol1
0.453	5.225	0.03874	Man2a2
0.4523	5.676	0.03248	Dapk1
0.4461	6.574	0.01398	Glrb
0.4446	7.263	0.02793	Cask
0.4415	11.2	0.01492	Nlgn1
0.439	6.629	0.01886	Hk1
0.4373	7.384	0.02562	Tspan3
0.4335	7.695	0.04142	Shisa9
0.4324	6.38	0.04209	Tdrd3
0.4323	7.234	0.01393	D130040H23Rik
0.4253	8.079	0.02031	Ehbp1
0.4212	6.256	0.03498	Zmiz1os1
0.4165	8.978	0.02128	Gm6145
0.4134	7.481	0.02116	Cyp7b1
0.4063	6.106	0.03293	Ccdc136
0.4009	8.458	0.02453	Fads2
0.4009	5.988	0.03223	Gramd4
0.39	10.02	0.01671	Trim9
0.3879	5.854	0.03856	Aco1
0.3839	6.171	0.04438	4732471J01Rik
0.3839	6.25	0.04781	4933431E20Rik
0.3749	6.748	0.02562	Purg
0.3738	8.133	0.04275	Ccdc141
0.3686	8.474	0.04069	Wwox
0.3656	6.35	0.04241	Golm2
-0.3905	7.662	0.03343	Hlf
-0.4057	8.86	0.02445	Map2
-0.4072	6.176	0.04142	Parp8
-0.408	6.626	0.01381	Clk1
-0.4109	7.736	0.01384	Tprkb
-0.4172	5.363	0.0351	Ercc5
-0.4203	8.929	0.01934	Phka1
-0.4299	5.863	0.02251	Nfe2l2
-0.4322	7.655	0.02601	Id4
-0.435	5.922	0.02569	Cyb5b
-0.4353	7.824	0.02106	Cdk19
-0.4389	6.021	0.03874	Rarb
-0.44	10.76	0.02056	Plcb1
-0.4421	7.047	0.02477	Sat1
-0.4515	8.352	0.009911	Vcl
-0.4579	6.098	0.01326	Luzp1
-0.4593	6.845	0.04438	Chst2
-0.463	4.6	0.0423	Nrbp2
-0.4672	5.471	0.04723	Ift74
-0.4676	6.222	0.01886	Zbtb38
-0.4736	5.933	0.04099	Lman1
-0.4752	5.044	0.03389	Senp3
-0.4761	6.565	0.005006	Wdpcp
-0.4796	7.44	0.009277	Syn2
-0.4881	9.68	0.02035	Dclk1
-0.4883	5.13	0.0492	9630028H03Rik
-0.4919	8.738	0.009675	Sorbs1
-0.4956	5.067	0.04713	Nsmf
-0.4999	6.564	0.008376	Kctd1
-0.5008	4.842	0.03227	Iqce
-0.5056	6.096	0.007662	Ptma
-0.5084	5.278	0.03398	Gm31907
-0.5135	4.853	0.04878	Castor2
-0.5157	5.2	0.03785	Sall1
-0.5163	5.984	0.01556	C2cd3
-0.5295	6.226	0.006834	Dpyd
-0.5306	8.9	0.008701	Ndrg2
-0.5312	5.852	0.008927	Gca
-0.5321	4.857	0.04953	Cacna2d2
-0.5337	5.877	0.00563	Pon2
-0.5344	4.252	0.04545	Rplp2
-0.5427	5.198	0.01828	Cfap36
-0.5453	5.575	0.02347	Bcor
-0.5482	7.009	0.04657	Cmip
-0.55	5.206	0.01018	Hes1
-0.5575	4.807	0.01384	Gtf2h2
-0.5608	7.131	0.004402	Mxi1
-0.5619	5.93	0.03047	Itpr1
-0.5654	5.897	0.00434	Ppp1r3c
-0.5691	7.9	0.01505	Hspa8
-0.5706	3.972	0.0443	Tjap1
-0.5739	4.679	0.02356	Caml
-0.587	5.643	0.008182	Hsd11b1
-0.5917	7.521	0.01316	Calr
-0.5996	8.736	0.004172	Fam20a
-0.6042	5.124	0.01433	Cep120
-0.6079	5.063	0.01052	Inf2
-0.6089	4.311	0.02687	Nphs1
-0.615	5.486	0.001264	Rbm28
-0.6187	3.936	0.04854	Tmem18
-0.6192	7.059	0.003262	Npc1
-0.6288	6.246	0.001694	Zkscan3
-0.6357	4.09	0.01669	Fra10ac1
-0.6363	4.989	0.02898	Thrsp
-0.64	5.191	0.01031	Oscp1
-0.6434	6.718	0.004318	Shroom3
-0.6439	8.873	0.003161	Pde7b
-0.6488	3.949	0.02627	Ciapin1
-0.6495	5.569	0.009645	Pot1b
-0.6523	4.279	0.01302	Zfp738
-0.6665	4.999	0.01003	Tesk2
-0.6701	3.699	0.02835	Slc35b1
-0.6712	3.939	0.02583	Pom121
-0.6749	8.446	0.006591	Cdh19
-0.677	4.969	0.00803	Zfp933
-0.6798	5.716	0.00299	Thsd7a
-0.6802	3.763	0.04781	Rps18
-0.6909	5.674	0.03047	Adamts6
-0.6971	5.874	0.003545	Pdia4
-0.7047	7.089	0.01886	Tra2a
-0.7092	5.279	0.003161	Sipa1l2
-0.7129	4.671	0.007662	Smoc1
-0.7133	5.866	0.00125	Arsb
-0.7157	5.431	0.00168	Tmem100
-0.7224	8.192	0.0002232	Eif4g3
-0.7276	3.254	0.04555	Paf1
-0.7306	3.813	0.02154	Spef2
-0.7307	5.017	0.02871	Enpp2
-0.7319	3.394	0.04082	Rpl34
-0.737	3.933	0.01316	Rbms2
-0.7375	4.058	0.01137	Acaa1a
-0.7378	4.15	0.009814	Fam76a
-0.7411	8.801	0.007432	Dio2
-0.7424	3.599	0.04643	Ccdc61
-0.7508	8.536	0.03874	Gm19951
-0.7587	3.872	0.02732	Junos
-0.7628	4.453	0.003048	Rap1gap
-0.7685	3.68	0.02346	Ncapd2
-0.7731	3.418	0.02244	Ppp1r3d
-0.7741	6.171	0.0001687	Btaf1
-0.7777	4.096	0.03785	Pmepa1
-0.7794	3.4	0.0191	Ifih1
-0.7794	3.666	0.02096	Tpd52
-0.7864	12.87	0.000163	mt-Rnr2
-0.7864	4.778	0.002413	Gas5
-0.7902	5.476	0.00803	Slc43a2
-0.8029	6.466	4.185e-05	Aldh7a1
-0.8068	8.303	0.007232	Akap6
-0.8148	4.392	0.04854	Ddit4
-0.8166	3.574	0.01564	Glb1l
-0.8209	3.898	0.01382	Man2b1
-0.8232	9.26	0.01886	Rgs7
-0.8252	4.278	0.01346	Mbp
-0.8277	2.956	0.02155	Mrpl27
-0.8559	3.173	0.0251	Tlcd2
-0.8585	6.863	1.857e-05	Ide
-0.8591	5.439	0.01511	Per1
-0.8684	12.5	7.351e-05	mt-Rnr1
-0.8707	7.283	8.48e-05	mt-Co1
-0.8775	5.443	0.01928	Ralgps2
-0.8786	3.239	0.01851	Gm49380
-0.8796	2.861	0.03324	Tomm7
-0.881	4.206	0.004793	Elavl3
-0.884	7.574	6.242e-05	mt-Cytb
-0.8934	4.762	0.01556	Ttll3
-0.9021	2.941	0.04241	Odc1
-0.9051	3.56	0.01712	Slc7a5
-0.9069	7.873	0.0001687	Hdac4
-0.9072	3.667	0.01934	Ggta1
-0.919	3.688	0.009645	Vit
-0.9191	3.938	0.002159	Tatdn3
-0.9202	4.911	0.04202	Arrdc3
-0.9245	7.632	0.001988	Rgma
-0.9247	6.337	0.0443	Nav3
-0.9342	6.187	0.000115	mt-Nd1
-0.9347	6.146	1.515e-05	mt-Nd2
-0.9347	3.939	0.002413	Ccdc163
-0.9379	3.191	0.02324	ENSMUSG00000121141
-0.9385	6.039	4.709e-05	mt-Nd4
-0.9399	2.457	0.03202	Rogdi
-0.9568	3.295	0.02259	Zc3hav1
-0.9579	2.919	0.04099	Plpp4
-0.9689	3.61	0.01981	Emd
-0.9864	2.39	0.03278	ENSMUSG00000120012
-0.9937	7.823	0.0007745	Pde4b
-1.006	2.283	0.04241	Ciart
-1.016	6.542	1.857e-05	mt-Nd5
-1.03	3.069	0.0251	Slc24a2
-1.038	7.662	0.02445	Rcan2
-1.039	3.772	0.003134	A830008E24Rik
-1.072	4.192	0.0006298	Spata6
-1.077	2.049	0.04375	Tesk1
-1.087	3.353	0.003463	Cep85
-1.097	3.465	0.02453	Slc38a1
-1.112	6.022	0.02781	Plp1
-1.114	5.513	0.0002266	Nsdhl
-1.119	4.14	0.0001049	Ccdc28b
-1.126	2.773	0.01657	Ikbke
-1.135	2.635	0.04781	Ptgds
-1.18	5.077	0.00434	Agbl4
-1.183	1.873	0.04129	Copz2
-1.183	2.167	0.04769	Gm46440
-1.19	2.708	0.01917	Arrb2
-1.191	3.334	0.007198	Slc25a47
-1.194	4.367	0.04536	Ankrd44
-1.196	2.348	0.03092	Stk36
-1.209	2.922	0.01917	H2-D1
-1.21	6.18	0.001377	Map3k19
-1.228	5.217	0.002438	Eya4
-1.229	2.915	0.002994	Adamts10
-1.249	2.302	0.04202	Hk2
-1.257	3.463	0.009911	Gem
-1.264	2.35	0.02445	Zfp951
-1.275	2.349	0.0127	1700086O06Rik
-1.284	1.812	0.01704	H2-T22
-1.294	4.066	0.008927	Noct
-1.31	4.851	0.001603	A930015D03Rik
-1.322	1.535	0.03324	Dpysl4
-1.326	1.575	0.03107	Rps4l
-1.327	3.122	0.005391	Gm48099
-1.33	2.768	0.007662	Rpl29
-1.334	3.058	0.01674	Frrs1
-1.341	4.482	0.02207	Coq10b
-1.342	7.224	9.559e-07	Agmo
-1.365	2.088	0.005006	Sox4
-1.373	4.51	0.001326	Disc1
-1.389	3.039	0.001734	Gm30075
-1.401	3.759	0.01003	Prkcd
-1.405	1.494	0.04062	Lpar1
-1.408	1.81	0.04854	Ermn
-1.424	1.774	0.01934	Srp54a
-1.438	5.517	6.521e-06	Slc25a21
-1.468	2.368	0.04891	Lrrk1
-1.492	1.442	0.02244	Tekt1
-1.496	3.321	0.003424	Trf
-1.507	5.678	5.835e-07	Pdgfd
-1.543	1.335	0.0205	4833411C07Rik
-1.563	0.9201	0.04854	Aldh16a1
-1.596	1.814	0.03047	Tec
-1.649	1.633	0.005316	Gjc3
-1.654	2.561	0.0001532	Ddr2
-1.743	1.244	0.004793	Gm2415
-1.746	4.518	5.835e-07	4833420G17Rik
-1.78	2.86	0.0005695	Ulk4
-1.785	1.078	0.04495	Gm5083
-1.788	4.254	0.02601	Rab6b
-1.795	2.767	0.0002955	Unc80
-1.83	1.246	0.006579	Atp8b1
-1.862	1.896	0.0006643	Sox11
-2.05	1.679	0.001988	Bambi
-2.05	2.082	0.004843	Rab27b
-2.059	1.231	0.009539	Gm44626
-2.083	5.364	6.497e-06	Cacna1d
-2.089	3.881	0.006629	Rpph1
-2.094	3.911	9.277e-06	Cmya5
-2.097	2.568	0.008523	Col1a2
-2.105	2.173	0.03755	Adap2
-2.148	1.492	0.004677	Dapk2
-2.156	3.482	0.000451	Mpp7
-2.233	1.122	0.003424	Cast
-2.239	1.127	0.03874	Pawr
-2.256	8.221	0.009814	Pde10a
-2.282	1.864	0.0005976	Gadl1
-2.34	1.468	0.0004648	Atoh8
-2.351	1.784	0.03228	Rtn4rl1
-2.395	1.925	0.001095	Extl1
-2.592	2.025	0.0001532	4933427I22Rik
-2.75	1.518	0.007211	Ano5
-2.866	3.259	5.835e-07	6430590A07Rik
-3.701	5.465	0.007432	Fam163a
-3.74	4.391	0.012	Egfem1
-4.318	0.3467	6.242e-05	Gpnmb
-4.352	-0.3624	0.0002772	Zfp125
-4.526	1.585	0.0001077	ENSMUSG00000121318
-5.482	-0.6103	5.835e-07	C130046K22Rik
-0.629	3.675	0.05037	Gm266
-0.3411	6.526	0.0507	Mbtd1
0.9771	3.227	0.05071	Polr3g
-0.3815	6.516	0.05081	Pcdhgb2
0.4787	6.034	0.05092	Cdk17
1.525	2.981	0.05152	Cfap54
0.875	6.138	0.0521	A630089N07Rik
-1.177	1.914	0.05226	1190007I07Rik
0.4968	4.781	0.0524	Zcchc2
-0.9652	2.848	0.05324	Skil
-0.677	3.934	0.05324	Scoc
0.3851	5.814	0.05324	Pmp22
-0.7063	7.672	0.05324	Hspa5
0.3987	5.481	0.05324	Clcn5
-0.4985	5.377	0.05324	Cerk
-0.4617	5.627	0.05324	Ttr
-0.4795	4.945	0.05324	Dnajb11
1.099	1.687	0.05334	Ppargc1b
-1.001	2.375	0.0539	G0s2
-0.9754	5.874	0.0539	Gm10125
-0.3905	6.082	0.05473	Slc38a9
0.3695	6.358	0.05506	Sema4a
0.6225	4.748	0.05506	Shisal1
0.5296	5.025	0.0555	Jun
0.4702	5.958	0.05657	Ankrd29
0.4536	5.215	0.05665	Rcor3
-0.526	4.059	0.0567	Pcdhga6
-1.514	1.286	0.05716	Gng11
0.6169	3.971	0.05721	Kbtbd3
1.295	1.808	0.05721	Ndn
0.6606	4.39	0.05747	Fbxl7
-1.058	1.971	0.05776	Mal
-0.4032	5.674	0.05778	Lrrc49
-1.081	1.851	0.05813	Gm28836
0.9523	8.404	0.05813	Hdac9
-0.4736	4.61	0.05813	Ift122
-1.102	1.56	0.05813	Gm17036
-1.533	1.151	0.0583	Plekha2
0.4382	6.252	0.0583	Mmp14
-1.1	2.085	0.05845	Arpc1b
-0.4561	6.499	0.05887	Megf9
-0.6323	5.662	0.05887	Gm21954
-0.9528	5.438	0.05932	C030005K06Rik
-0.845	2.701	0.05953	Ntpcr
0.9869	4.665	0.05953	Sfrp1
-1.011	2.833	0.05956	Pex5l
0.368	6.684	0.06003	Supt3
0.3599	6.306	0.06032	Sil1
-0.3368	6.675	0.06063	Top1
-0.3617	6.13	0.06097	Stat3
-1.374	1.485	0.06097	D7Ertd443e
-0.4476	4.99	0.06097	Slc38a6
0.4371	6.007	0.06109	Fnip2
-0.6611	3.17	0.06138	Sf3a2
-0.3854	5.402	0.06146	Lpin2
-0.443	7.524	0.06177	Lgi1
0.3621	5.713	0.06177	Stk17b
-0.3978	4.889	0.06204	Azi2
0.5245	4.782	0.06239	Bcorl1
-0.6212	3.713	0.06277	Zfp335
0.5687	6.185	0.06277	Gm26843
0.4542	7.007	0.06277	Hrh1
-0.5362	5.069	0.06297	Smap2
0.469	4.363	0.06335	Efs
0.4929	6.543	0.06335	Actg1
-1.203	1.218	0.06335	Adap2os
-0.5231	4.456	0.06389	Rpgrip1l
0.4488	6.059	0.06389	Gm49797
-0.9334	3.117	0.0641	Pcdhga5
-1.105	1.452	0.06446	Cd27
-1.227	1.047	0.06446	Dusp7
0.4566	6.239	0.0645	Flrt2
-1.029	1.584	0.06477	Hfe
0.3591	5.683	0.06498	Eif2ak4
0.4493	4.962	0.06498	Lhpp
-0.7652	2.696	0.06498	Nudt6
-0.4603	4.788	0.06535	Rnh1
-0.5248	4.237	0.06596	Rtraf
-1.668	4.263	0.06611	A730056A06Rik
-0.3916	7.417	0.06629	Pfkp
-1.935	3.134	0.06629	Ccnb1ip1
0.5939	3.998	0.06664	Stxbp1
-4.141	1.687	0.06669	4930481A15Rik
-1.328	1.384	0.0667	ENSMUSG00000121456
0.5103	6.956	0.0667	Fggy
0.4902	4.769	0.06676	Rnf2
-0.4146	5.034	0.06685	Rrp1
-0.6797	4.457	0.0678	Brsk2
0.8081	4.973	0.06781	Gm4221
0.3834	6.366	0.06807	Snph
0.3514	6.073	0.06875	Arhgef40
-1.143	5.818	0.06875	ENSMUSG00000095041
0.5181	6.66	0.06878	Plekha7
-1.362	1.225	0.06878	Spock1
-0.4979	5.889	0.06878	Sorbs2
-1.549	2.15	0.06878	Rgs2
-0.9732	2.009	0.06894	Dscaml1
0.4682	4.7	0.06987	Zc3h6
0.3735	6.14	0.07015	Atad1
-0.569	5.512	0.07051	Hip1r
0.7088	3.632	0.07109	Tmem131l
-0.9605	5.148	0.07109	Zfp961
-0.3816	5.176	0.07127	Srsf3
-0.4734	4.887	0.07141	Pcdhb14
-0.3796	8.004	0.07178	Sesn3
-0.9803	1.926	0.07217	Irgm2
0.3382	7.499	0.07221	Ttc3
0.4466	6.739	0.07221	Atp5pb
-0.743	3.079	0.07221	1110032A03Rik
0.3832	6.758	0.07243	Acadl
0.4147	6.147	0.07243	Hmgn3
1.158	1.985	0.0725	Gm43666
-1.446	1	0.0725	Cldn11
0.7752	2.861	0.0725	Gm14443
-0.3436	11.11	0.07281	Cpe
-0.6349	3.563	0.07281	Exosc9
-0.5757	4.004	0.07281	Rps7
-0.3773	7.548	0.07291	Nt5c2
0.8428	2.875	0.07291	Piezo1
-0.591	4.134	0.07291	Zbtb40
0.3812	5.861	0.07291	Wnt7b
-1.34	1.538	0.07367	Lingo4
-0.7074	2.939	0.07458	Mok
-0.5282	4.824	0.07468	Herpud1
0.5446	7.108	0.07542	Dock7
0.5201	4.262	0.07542	Fam8a1
0.9525	2.598	0.07542	Zscan18
0.3157	8.027	0.07581	Nr3c1
1.022	9.494	0.07605	Fars2
-0.3107	7.933	0.07691	Gpld1
-0.6461	3.806	0.07696	Ell2
0.7895	2.805	0.07696	Mrpl14
-0.6153	3.849	0.07733	Gm20422
-0.6395	3.276	0.07744	Gramd1c
-1.968	3.598	0.07744	4933406I18Rik
0.5293	4.484	0.07768	Optn
-0.8139	3.158	0.0777	Kcnip1
0.4545	5.742	0.07799	Rnf217
0.3351	6.125	0.07808	Sipa1l3
-0.9881	1.934	0.07825	Cebpd
0.87	3.492	0.07825	Gli1
-0.5261	4.69	0.07825	Nfatc1
0.854	4.566	0.07826	Lhfpl3
-0.431	5.42	0.07846	Tle3
1.203	1.144	0.07852	Gm13938
-0.4046	5.523	0.07852	Per2
-0.3741	5.455	0.07896	Txndc11
0.4273	5.034	0.07905	Slc30a5
-0.2941	8.86	0.07923	Spag9
-0.4547	6.524	0.07954	Frem2
-0.6217	3.403	0.07964	Smg9
0.3565	5.389	0.08002	Macrod1
0.468	4.612	0.08002	Plagl1
-0.3682	7.952	0.08034	Epas1
0.8348	2.717	0.08056	Apcdd1
-0.5436	3.749	0.08056	Mbd6
-0.4652	11.38	0.08056	Trpm3
0.5652	3.91	0.08064	Ass1
-1.11	1.424	0.08078	Ndrg1
0.6019	3.713	0.08079	Adra1b
-0.7363	5.284	0.08123	Klhl29
-0.4253	8.25	0.08123	Nav2
0.4368	4.665	0.08123	Sfi1
-0.7137	3.127	0.08144	Htra3
0.5071	4.501	0.08144	Slc30a4
-0.5197	4.054	0.08144	Fau
0.3557	6.233	0.08144	Tlk1
0.4586	4.605	0.08144	Gucy1b1
-0.629	3.432	0.08144	Zfp862-ps
0.3451	6.045	0.08144	Slc22a17
-0.9633	1.749	0.08144	Pcgf1
0.3389	5.776	0.08216	Pfkfb3
-0.3279	6.769	0.08245	Prrc2a
-0.6925	3.72	0.08245	Rfng
0.2951	7.697	0.08245	Soat1
-2.111	3.134	0.08354	Fos
-0.3274	7.676	0.08431	Aak1
-1.983	3.489	0.08455	Ndrg4
-0.8386	3.935	0.08455	Pdgfrl
0.4758	4.236	0.08559	Zbtb1
0.5766	4.129	0.08568	Hdac5
-0.7227	2.925	0.08573	Trim25
-0.4992	4.819	0.08573	Slc22a4
-0.4479	4.589	0.08573	Hdac1
0.4556	5.524	0.08575	Cmtm5
-0.3309	6.651	0.08577	Snx29
0.7728	3.273	0.08602	3110009E18Rik
0.4864	4.252	0.08696	Slc25a40
0.5229	4.418	0.08779	Ntng2
0.4397	4.446	0.0878	Las1l
-1.104	1.329	0.0878	Rnf144b
0.3277	8.691	0.08791	Ntsr2
0.5645	6.009	0.08822	Efna5
-0.4456	4.409	0.08833	Syvn1
-0.8339	2.027	0.08836	Stmn1
-0.3999	8.923	0.0884	Plcl1
-0.7946	8.646	0.0884	Zswim6
-0.6115	3.646	0.0884	Prrt1
0.3433	6.381	0.0884	Chst10
1.007	1.946	0.0884	Gm38593
0.4607	4.801	0.0884	Pgap4
-0.5295	3.8	0.08864	Eml1
1.935	0.8421	0.08982	Lgals12
0.3561	6.244	0.08998	A930017M01Rik
-0.5507	3.584	0.0901	Tnr
1.226	1.514	0.09037	Gm17382
-0.5334	3.782	0.09037	Mettl5
0.5632	3.6	0.09049	Eepd1
-0.4666	4.074	0.09049	Gtf3c2
-0.6088	4.946	0.09049	Col11a2
-0.7595	2.734	0.09349	Pctp
-0.5786	5.106	0.0935	Hyou1
-1.002	1.858	0.09356	Sh2b3
0.3859	5.036	0.09363	Cldnd1
1.039	2.552	0.09366	Rgs5
0.4356	5.031	0.09387	Cdkl3
-0.8782	2.347	0.0942	D930020B18Rik
-0.3613	5.602	0.0943	Pnrc2
-0.8901	1.794	0.0943	Gm17501
0.9624	3.743	0.09444	Gm48765
0.3243	6.272	0.09444	Ctso
-0.4785	4.36	0.09468	Rpl41
0.3739	5.674	0.09477	Paxbp1
-0.5155	5.487	0.09481	Myh9
0.9469	2.443	0.09482	1700027A15Rik
0.7709	3.292	0.09482	Impa2
1.059	1.929	0.09482	Ip6k3
-1.157	1.264	0.09494	Sulf2
0.8823	3.732	0.09503	Inhba
-0.809	2.307	0.09589	Bbs10
0.4734	4.147	0.09611	Pogk
0.8328	2.307	0.09655	Gm48512
-0.3795	5.699	0.09661	Zscan26
1.156	1.616	0.09668	Nabp1
-0.2883	7.274	0.09668	Pan3
-0.4021	4.969	0.09769	Mtif2
-1.159	3.454	0.09857	Gm29521
0.7947	2.578	0.09873	4932441J04Rik
-0.3652	5.21	0.09873	Cramp1
-0.3901	5.375	0.09873	Dhtkd1
-2.036	6.784	0.0998	Etnppl
0.3568	5.68	0.09983	Plekha1
-0.4634	5.509	0.1008	Dnaja1
0.914	2.474	0.1011	Pipox
-0.6063	3.607	0.1012	Arpc3
-0.9963	2.352	0.1016	Ctsc
0.3252	6.253	0.1017	Rab3gap2
0.4578	4.828	0.1025	Rnf121
-0.8054	2.889	0.1027	Plk2
0.4528	6.277	0.1027	Klhdc7a
0.6378	4.593	0.1027	Ednra
0.5053	3.988	0.1027	Akap1
0.3891	5.972	0.103	Amer2
-0.6912	3.538	0.1031	Gjb2
-1.106	1.696	0.1033	Rfx8
-0.3673	5.169	0.1033	Cxxc5
0.4618	5.663	0.1034	Pkp4
1.402	1.079	0.1034	Rps6ka6
-0.7361	5.606	0.1034	Entpd1
-0.4999	3.787	0.1034	Rfxank
-0.3679	5.475	0.1039	Capza1
-0.3046	10.9	0.1041	Prex2
-0.6136	3.208	0.1043	Gmppa
-2.04	2.732	0.1044	Marchf1
-1.73	2.099	0.1048	Fscn1
0.4576	4.341	0.1048	Poldip2
1.232	5.418	0.1048	Slc35f1
-0.488	4.506	0.1056	Fis1
-0.3441	7.738	0.1056	Nim1k
-0.9151	1.95	0.1056	Gm47827
-0.3184	6.964	0.1061	Med13l
0.5924	3.719	0.1065	Zfp775
0.6945	2.862	0.1066	Tmie
-0.6673	3.022	0.1066	Magee1
-0.3055	7.526	0.1069	Chd2
0.8263	2.799	0.1071	Slc25a15
-1.366	0.9277	0.1072	Crlf2
0.5208	4.162	0.1072	Elapor2
-0.9354	1.889	0.1072	Plekhh2
-0.6407	2.861	0.1073	ENSMUSG00000120113
1.849	1.775	0.1073	Cntn4
0.8212	2.843	0.1075	Spag16
-0.3656	5.312	0.1076	Myo9b
0.7248	4.256	0.1077	Fgd1
0.643	3.617	0.1077	Pm20d1
0.743	3.692	0.1077	Tmprss7
-0.7325	2.337	0.1078	Gm15851
-0.9164	1.905	0.1081	Reln
0.388	5.344	0.1081	Epm2a
-1.381	3.217	0.1081	Thbs4
-0.428	5.422	0.1081	Cotl1
0.7235	3.048	0.1081	Plxnd1
-1.013	2.202	0.1081	Nucb2
0.4106	5.671	0.1082	Lhfpl2
0.3252	5.559	0.1082	Gm11149
-0.3146	5.869	0.1082	Rassf2
-0.3318	6.086	0.1082	Creb1
0.4885	4.522	0.1082	Selenon
-0.4667	4.202	0.1085	Gtf2f1
-0.4297	10.61	0.1092	Acsl3
0.3504	5.99	0.1094	AA387883
-0.7845	2.582	0.1097	Ebf1
-1.098	1.302	0.1097	Ugt8a
-1.169	1.705	0.1103	9530052E02Rik
0.4941	4.539	0.1107	Ezh2
0.3421	5.642	0.1107	Inpp5f
-0.7466	2.457	0.1108	Capn10
0.7333	3.387	0.1111	Angptl4
0.3128	7.41	0.1111	Gm20713
0.2757	8.584	0.1111	Sorcs2
-0.3759	4.499	0.1111	Zcrb1
0.4363	5.098	0.1125	Trpc1
-0.3028	6.549	0.1125	Numb
0.3357	7.046	0.1128	E130307A14Rik
-0.9463	1.589	0.1128	B9d2
-0.8688	6.3	0.113	Usp2
-0.6588	2.989	0.1134	4931414P19Rik
-0.3114	7.483	0.1137	Mapre2
0.4172	6.306	0.1137	Eogt
0.4443	4.236	0.114	Fan1
-0.3302	7.364	0.114	Dbx2
0.3697	10.02	0.114	Mfge8
-0.3311	5.418	0.114	Nmt1
0.5548	4.207	0.1147	Gpd1l
-0.6838	2.624	0.1148	Exog
-0.461	3.692	0.1156	Irf3
-0.4609	4.185	0.1164	Zfp746
-0.592	5.705	0.1167	Frmd4b
0.5684	3.787	0.1167	Stom
-1.448	1.921	0.1174	Anxa3
-0.7087	2.434	0.1174	Radil
-0.4346	4.138	0.1183	Cep104
-1.498	0.7897	0.1183	Gm45875
-0.9952	4.976	0.1183	Kcnd3
-1.474	4.92	0.1185	Rpe65
0.4501	4.725	0.1185	Rp9
0.3965	5.29	0.1192	Prkag2
-1.227	2.98	0.1194	Tbc1d9
-0.3695	5.145	0.1195	Ift80
-0.3139	7.243	0.1196	Ivd
-2.181	1.218	0.1196	Stab1
-0.3972	5.06	0.1196	Emc8
-0.6433	7.574	0.1202	Pnpla7
0.7286	5.463	0.1207	Sema6a
-0.598	2.948	0.1214	Adarb1
0.3011	9.103	0.1216	Tox
0.3922	4.983	0.1218	Gpc4
-0.5815	3.398	0.1218	Ccdc13
-0.7369	3.251	0.1219	Slc16a6
-0.4412	4.901	0.1221	Zcchc18
0.4115	4.522	0.1226	Cdc14b
-0.3645	6.054	0.1226	Me3
-0.4075	4.474	0.1229	Brd9
0.4529	5.489	0.1235	Ranbp17
0.2599	7.145	0.1236	Extl3
-0.3403	7.631	0.1237	Hip1
-0.3393	9.332	0.1239	Ddhd1
-0.839	3.743	0.1239	Dusp1
-0.7064	2.654	0.124	Cox16
-0.6172	3.706	0.1246	Col27a1
0.4796	4.19	0.1246	Usp28
-0.3055	6.375	0.1259	Kif5b
0.3421	6.935	0.1263	Cd63
0.6098	3.301	0.1263	Klf8
-0.3208	5.76	0.1263	Zfhx2
-0.6407	4.056	0.1269	Rbp1
1.405	0.75	0.1272	Zfp455
-0.5087	4.96	0.1274	Mlec
-0.7606	2.404	0.1275	Prorsd1
0.5917	3.251	0.1276	Spata24
0.3696	5.915	0.1276	Chn1
-0.2889	7.321	0.1278	Sfpq
1.188	1.17	0.1278	ENSMUSG00000120078
-0.3154	6.302	0.1278	Septin8
0.4106	5.224	0.1279	Acaa2
-0.4224	3.978	0.1286	Ypel3
-0.5736	4.586	0.1292	Akr1e1
-0.9484	1.682	0.1292	Ttc30b
-0.2711	8.534	0.1301	Fermt2
0.7025	4.742	0.1301	Gm44593
-0.7928	2.452	0.1302	Cenpt
-0.263	8.227	0.131	Fgd6
0.2951	7.18	0.1316	Pgm1
0.7119	2.983	0.1316	Mtrr
-0.3681	4.715	0.1316	Zbtb7a
0.4605	5.732	0.1322	Gm45846
-0.511	6.877	0.1322	Mt2
-0.354	4.848	0.1322	Ttc4
0.6324	3.122	0.1326	Zfp58
0.6283	2.936	0.1331	Sms
-0.445	4.279	0.134	Serf2
0.7836	8.41	0.134	Efr3b
1.109	1.39	0.1341	Entrep3
0.4984	4.696	0.1344	B230307C23Rik
-0.4862	5.326	0.1344	Crem
-0.5239	3.711	0.1347	Rpl10
-0.7183	2.357	0.1348	Gp1bb
-0.3245	5.068	0.1352	Snw1
-0.4691	3.682	0.1355	Unc45a
-0.6713	2.65	0.1355	Csf2ra
-0.5292	5.887	0.1355	Pdia6
0.9169	1.778	0.1363	1810010H24Rik
0.5945	4.039	0.1369	Pcdhga11
-0.9972	1.534	0.137	B430010I23Rik
-0.5541	4.326	0.1374	Nsun7
-0.7507	2.557	0.1376	Rps28
0.2859	7.767	0.1376	Peli2
0.4565	6.046	0.1376	Zfp800
-0.6155	3.195	0.1376	Thyn1
-0.4012	4.945	0.1376	Irf2bp2
-0.6526	2.824	0.1376	Gm42836
0.4387	4.5	0.1376	Simc1
-0.3505	4.931	0.1383	Ifnar2
0.3957	4.764	0.1383	Lekr1
0.3991	4.335	0.1386	Nfrkb
0.8368	4.411	0.1388	Greb1
0.2946	6.682	0.1388	Nectin3
0.3948	4.766	0.1389	Nol10
0.4011	5.198	0.1389	Gclc
-0.5007	4.088	0.1403	Gm12940
-0.663	3.16	0.1403	Zfp446
-0.8811	1.805	0.1403	Gm27153
0.5098	4.141	0.1406	Nampt
0.4755	4.775	0.1409	Gdf11
-0.8158	7.947	0.1411	Phactr1
-0.5569	3.024	0.1421	Dusp12
-0.4496	3.999	0.1423	Tnfsfm13
-0.6944	3.288	0.1423	Ust
0.8624	2.11	0.1423	Nudt10
0.4479	9.17	0.1425	Cpeb4
0.6801	2.832	0.1425	Syt10
-0.3775	4.387	0.1425	Secisbp2
0.2962	10.81	0.1432	Pbx1
-0.5867	3.536	0.1432	Gm3365
-0.8712	2.159	0.1432	Prkch
0.672	3.5	0.1434	Ralyl
0.3379	5.019	0.1439	Ctnnal1
-0.4527	3.805	0.1439	Pdk1
-0.5083	3.521	0.1439	Supt7l
0.9356	1.889	0.1439	Mapk7
-0.7392	2.316	0.1441	Cplane2
0.3649	5.092	0.1441	Pde7a
-0.6389	3.503	0.1441	A330032B11Rik
-3.244	0.6346	0.145	Gm35722
-0.2844	7.165	0.1454	Luc7l3
0.9851	1.746	0.1454	B230303A05Rik
0.3351	7.002	0.1455	Mfhas1
0.2755	8.808	0.147	Prdx6
-0.3399	4.905	0.1471	Ccpg1
-0.3634	16.94	0.1471	Rn18s-rs5
0.3739	5.7	0.1476	Ppt1
-0.4214	4.422	0.1477	Man1b1
0.3109	6.098	0.1477	Ube2g1
0.8429	2.452	0.1477	Gsto1
0.3007	5.926	0.1477	Tcp11l1
-0.515	3.684	0.1477	Mon1a
-0.6157	3.361	0.148	Med8
-0.589	2.95	0.1511	Ece2
1.012	1.141	0.1514	Upk3bl
0.4155	5.21	0.1514	Pacs1
-0.4378	4.252	0.1514	Rfx2
-0.4225	4.66	0.1514	Ccdc138
1.083	1.778	0.1515	Myh6
-0.827	2.42	0.1515	Kcnc3
0.4817	3.608	0.1519	Casp3
0.2924	5.398	0.153	Gnptab
-0.4628	3.764	0.1533	A430033K04Rik
0.5822	3.59	0.1535	Tmem80
0.2929	7.425	0.1536	Aox1
0.598	3.004	0.1537	Gm38250
-0.4548	4.027	0.1541	Ndor1 - ENSMUSG00000006471
-0.4061	4.373	0.1541	Mfsd8
-0.7271	2.474	0.1542	Ankrd54
-0.3415	5.311	0.1553	B4galt6
0.4626	4.534	0.1554	Slc9a7
-0.3844	6.067	0.156	Cped1
-1.025	4.272	0.1561	Nrg2
0.4975	4.871	0.1578	Pou3f4
-0.2637	6.509	0.1585	Zfp207
0.3233	6.606	0.1585	Rps6ka5
0.2931	9.227	0.1585	Fut9
-1.109	2.62	0.1585	Stab2
-0.3601	5.201	0.159	Srrt
-0.564	3.767	0.159	Tbc1d16
-0.756	2.335	0.159	Gm27151
0.9227	1.994	0.1591	Gm48967
0.3662	5.97	0.1591	Ldlr
-0.709	4.569	0.1591	Ccn1
0.3534	5.139	0.1591	Wdr1
-0.2701	7.506	0.1593	Rabgap1l
-0.3054	6.371	0.1602	Nrip1
-0.4031	4.306	0.1602	Rpl31
-0.6517	3.575	0.1604	Gm54867
-2.773	2.622	0.1609	Nr4a1
0.4597	4.133	0.1609	Gm15952
0.2785	6.629	0.161	Rai1
0.4576	5.076	0.1612	Hunk
-0.3221	6.409	0.1614	Gpcpd1
-0.7443	2.398	0.1614	Gstt3
-0.9561	1.919	0.1614	ENSMUSG00000121191
-0.4669	3.497	0.1614	Tmem205
-0.5477	3.189	0.1623	Rbm48
0.4091	6.16	0.1624	Tagln3
-1.038	2.124	0.1632	Cebpa
-0.7348	2.329	0.1632	Fgfbp3
0.587	3.447	0.1637	Slitrk5
0.3687	6.108	0.1641	Pygm
-0.3517	5.098	0.1644	H2bc4
0.8598	2.945	0.1644	Adamts12
0.278	8.932	0.1646	Mgll
0.2657	7.372	0.1649	Cdh11
-2.292	1.39	0.1649	Gm18132
0.3358	11.45	0.1653	Apoe
-0.4646	4.488	0.1656	Hjurp
-0.3067	12.03	0.1656	Luzp2
-0.3476	4.476	0.1662	Fbrs
0.3246	6.747	0.1662	Slc24a3
-0.8943	1.711	0.1662	Gsto2
-0.4651	3.904	0.1662	Nkapd1
-0.3595	4.891	0.1662	Wwp2
0.3339	6.301	0.1662	Ptprf
0.9357	1.682	0.1662	Iah1
-0.7941	2.85	0.1662	Ccdc8
-0.4193	6.6	0.1669	Kdm3a
0.4069	5.089	0.167	Gm41836
1.149	4.996	0.167	4932438H23Rik
-0.4028	4.193	0.167	Ciz1
0.7025	3.165	0.1673	Elavl4
0.2568	7.067	0.1675	Raver2
-0.4009	4.855	0.1675	Brf1
0.6983	2.519	0.1677	Gm47728
-0.3788	4.742	0.1677	Hsd17b7
-2.022	2.765	0.1678	ENSMUSG00000120091
-0.389	5.45	0.1678	Tcn2
0.5843	3.034	0.1679	ENSMUSG00000121477
-0.6031	3.037	0.1679	Rfx1
0.859	2.063	0.1679	Ovgp1
-0.6014	3.116	0.1679	Tomm6
-0.4452	4.051	0.1683	Mipep
-0.6681	3.316	0.1687	Ttc26
0.4415	4.824	0.1691	Fhl1
0.36	5.962	0.1691	Lrrk2
-0.4223	4.232	0.1703	Commd3
0.4874	3.96	0.1704	Il17rd
0.9076	2.044	0.1709	Dnah14
-0.7531	2.097	0.1709	Abca8b
1.253	1.062	0.171	Gm29460
-0.3696	4.618	0.171	Jdp2
-0.3271	5.082	0.171	Trp53inp1
-1.876	3.4	0.171	Sik1
-0.3574	4.594	0.1711	Coa8
-0.3133	5.389	0.1722	Gorasp2
0.2651	8.075	0.1723	Gabrg1
0.2622	9.499	0.1725	Prnp
-0.3737	4.986	0.1729	Rpl3
-1.263	1.143	0.1729	Capn11
0.3474	5.168	0.1729	Atg4c
-1.037	1.739	0.1729	Gm6225
-0.7727	1.868	0.1729	Pierce2
0.3154	6.183	0.1729	Tsc22d2
-0.269	6.133	0.173	Xpo1
1.113	1.674	0.1735	Eno2
0.2818	6.083	0.1735	Cdc42ep4
0.2984	6.173	0.1735	Memo1
0.5505	4.094	0.1735	A330032P22Rik
-0.3329	4.547	0.1735	Tox4
-0.7819	3.364	0.1735	Creld2
-0.3122	9.424	0.1735	Cdh20
0.578	3.665	0.1735	Mgat3
0.5245	4.248	0.1735	Rnls
0.4433	4.372	0.1736	Pgrmc2
0.4173	4.978	0.1736	Ephx1
-0.7961	2.339	0.1736	Bend7
-1.693	1.921	0.1737	Gng2
-0.8093	1.655	0.1737	Plekhh1
0.3638	4.685	0.1737	Fbxo10
0.4255	5.062	0.1737	Gm6277
0.3781	6.394	0.1737	Trerf1
0.5116	3.831	0.1737	Prorp
0.5722	3.171	0.1737	Plekha6
0.9351	2.706	0.1737	Syt7
-0.2646	8.309	0.1737	Rasa2
-0.2598	6.559	0.1737	Pibf1
-0.3342	7.126	0.1746	Itpkb
0.3423	5.756	0.1748	Colgalt2
0.4225	6.285	0.1748	Mir124-2hg
0.267	7.122	0.1748	Rtn4
-0.5194	4.036	0.175	Whrn
-0.2966	6.975	0.1753	Slc20a2
-0.3122	5.744	0.1754	Dusp11
0.2789	7.23	0.1754	Laptm4a
-0.5461	3.341	0.1754	Phf23
-0.2738	6.378	0.1756	Rab11fip4
0.2742	11.93	0.1757	Frmd4a
0.3864	5.047	0.1757	Fbxo30
0.494	3.337	0.1762	Stk35
0.4575	4.232	0.1766	Prrc1
0.3831	4.619	0.1766	Lrrc4
-0.2501	6.965	0.1771	Lrch3
0.3032	5.478	0.1774	Cept1
0.2774	5.654	0.1775	Dnajc18
-0.3913	4.969	0.1776	Dynll1
-0.4604	4.921	0.178	Arid5a
0.6001	3.016	0.1781	Zfand1
-0.7922	2.212	0.1786	AI197445
0.264	7.909	0.1788	Adcyap1r1
0.3431	4.816	0.1789	Txnrd1
-0.4491	3.762	0.1796	Coro1b
-0.802	2.024	0.1796	Sulf1
1.287	1.574	0.1796	Gpr176
-0.4347	4.528	0.1797	Ints1
-0.392	4.807	0.1797	Gmeb1
0.2804	5.515	0.1797	Adck1
-0.5587	3.863	0.1797	Rplp1
-0.6342	3.561	0.1797	Cdo1
0.7639	3.103	0.1797	Cdh22
-0.2679	5.951	0.1802	Cr1l
0.2957	10.59	0.1802	Grid2
-0.8775	1.573	0.1802	Gm34408
0.3598	4.355	0.1803	Clcn7
0.3328	4.895	0.1803	Brip1os
-0.3163	6.343	0.1812	Disp3
-0.5384	4.123	0.1812	Hr
0.746	2.615	0.1815	Dcbld1
0.5223	4.268	0.1816	Adora2b
0.4491	3.554	0.1816	Tmem64
0.2756	7.838	0.1816	Tnfrsf19
0.8386	1.954	0.1816	4732491K20Rik
-0.381	4.138	0.1816	Arfgap1
0.6899	2.435	0.1826	Slc7a6
-0.6398	2.827	0.1827	2310058D17Rik
0.4337	4.175	0.1827	Ell
0.5	4.545	0.1827	Rpp14
0.4394	4.714	0.1827	Fgf2
-0.3041	5.7	0.1827	Lrch1
0.283	6.882	0.1831	Gm16759
-0.6504	2.924	0.1832	Sesn2
0.2794	7.849	0.1832	Notch1
0.8415	6.518	0.1836	Cep128
0.8318	1.926	0.1842	Flvcr2
0.2853	5.996	0.1842	Tspan14
0.5842	4.034	0.1842	Cacnb1
0.2594	6.681	0.1847	A830019P07Rik
-0.5078	3.327	0.1847	Akna
0.4669	5.373	0.1857	Clic4
-0.2651	7.621	0.1857	Nfix
0.9886	6.231	0.1858	Arhgef28
-0.6819	11.36	0.186	Camk1d
-0.5467	3.209	0.1862	Gnl1
0.2421	7.609	0.1862	Ccdc50
0.7526	2.254	0.1862	B4galt2
-1.06	2.773	0.1868	Tmeff2
0.4825	7.194	0.1868	Grin2b
-0.3013	5.586	0.1868	Snx24
-0.3744	4.833	0.1868	B230219D22Rik
0.2531	6.292	0.1868	Elf1
-1.212	1.037	0.1874	Pakap - ENSMUSG00000089945
0.2548	6.275	0.1875	Suclg2
-0.5633	3.862	0.1875	Cit
0.439	4.199	0.1875	Ybx3
0.5024	3.626	0.1879	Gm11944
1.039	1.506	0.1879	Pcdhb3
-0.9569	1.665	0.1886	4933407L21Rik
0.2498	6.642	0.1892	Tom1l1
0.2938	8.181	0.1893	Ccdc85a
0.7237	2.781	0.1897	Gm1604b
-0.537	3.228	0.1905	4930545L23Rik
-0.7999	1.751	0.1911	ENSMUSG00000121500
0.3377	5.084	0.1911	Ipo9
-0.4718	7.041	0.1911	Agt
0.3676	4.375	0.1913	Spcs3
-0.2762	9.638	0.1913	Nhsl1
0.3486	7.642	0.1915	Ube2e2
0.4683	3.46	0.1915	Rsad1
0.8659	1.845	0.1921	Gm15663
0.5383	3.802	0.1929	Gnai1
-0.7883	1.645	0.193	Inhca
-0.5106	3.737	0.1937	Stk10
-0.6789	1.901	0.194	Zeb2os
-0.4778	3.348	0.1941	Cep44
0.2623	6.988	0.1944	Oxr1
-0.7364	1.877	0.1946	C530044C16Rik
0.4585	4.134	0.1946	Ppp1r14c
-0.5705	3.299	0.1946	Smarcd2
0.298	6.395	0.1946	Pdha1
-0.4819	3.321	0.1948	Dpp9
-0.803	2.327	0.195	Lmnb2
0.3398	5.031	0.195	Gm20743
-0.5281	3.047	0.1952	Gm11837
0.4068	5.008	0.1953	Ppm1l
0.4333	3.939	0.1954	Utp18
0.8971	1.572	0.1955	Bdnf
-0.3916	4.895	0.1955	Rpl13a
0.2986	5.442	0.1956	Acvr2a
0.31	5.215	0.1956	Kdsr
-0.5474	3.364	0.1956	Rcan3
0.3552	5.045	0.1965	Gsr
0.5707	3.197	0.1968	Dipk2a
0.658	2.919	0.1968	Armcx4
-0.374	4.565	0.1968	Itgb3bp
-0.488	3.032	0.1968	Tmem138
0.417	4.993	0.1968	Osbpl6
-0.3855	4.948	0.1968	Dvl3
-0.5087	4.033	0.1974	Cep164
0.9405	1.113	0.1975	Gstm7
-1.227	7.382	0.1975	Gm40578
-0.2591	6.571	0.1976	R3hdm2
0.4229	4.035	0.1976	Mtfr1l
0.4924	3.87	0.1976	Cirbp
0.5009	3.798	0.1976	Tlcd5
-0.9298	2.576	0.1976	Gm10069
-0.3758	4.158	0.1976	Trim12a
-0.7343	5.377	0.1976	Marcks
-0.332	5.105	0.1976	Stk4
0.3291	5.164	0.1976	Bmp7
-0.924	1.507	0.1976	Ccdc112
0.5654	3.305	0.1976	Mnt
0.3097	5.915	0.1976	Tgfb2
0.8509	2.261	0.1976	Vegfc
-0.6004	3.111	0.1976	Mobp
-0.7282	1.847	0.1976	ENSMUSG00000119994
-0.5423	2.975	0.1976	Gadd45gip1
0.8519	5.888	0.1976	Inpp4b
0.6626	2.911	0.1976	Egf
0.3955	4.66	0.1976	Mpp2
0.3362	5.505	0.1976	Dip2a
0.336	5.688	0.1976	Enpp5
-0.2486	6.096	0.1976	Ythdc1
-0.5606	3.255	0.1976	Rgl2
-1.046	1.159	0.1976	Tes
-0.5102	3.46	0.1976	Nckipsd
0.318	5.423	0.1977	Zfp467
-0.4919	3.166	0.1977	Dtd2
-0.4293	4.843	0.1977	Pdzd2
1.377	4.155	0.1977	Chrna7
-0.5111	3.438	0.1977	Gm32200
-0.6553	2.38	0.1977	Gm10516
-0.2957	5.864	0.1977	Cand1
-0.5017	3.991	0.1978	Cfap100
0.2988	7.336	0.198	Fads1
0.457	3.887	0.198	Tmem237
-0.4248	3.931	0.1982	Tmem219
-0.3233	4.843	0.1989	Wdr35
-1.376	4.524	0.1989	H2-K1
-0.6974	4.789	0.1989	Crym
-0.2641	5.764	0.1989	Chm
-0.6851	2.244	0.1997	Tusc2
0.2948	5.953	0.2	Acat3
-0.2408	6.336	0.2	Stxbp4
0.6376	2.489	0.2002	Guk1
0.2887	5.216	0.2006	Agrn
0.3163	6.267	0.2009	Idh1
-0.8148	1.917	0.2013	Trim34a
0.4955	3.552	0.2019	Rnaset2a
0.8601	1.805	0.202	Stn1
-0.686	7.456	0.2021	Adam23
0.8367	1.888	0.2025	Nectin1
-0.2562	5.652	0.2025	Senp1
-0.3434	4.505	0.2025	Raph1
0.4951	6.284	0.2027	Apba1
-1.992	1.837	0.2027	Il6ra
-0.7829	1.748	0.2027	Ano4
-0.7999	1.672	0.2027	Ecm2
-0.3809	5.35	0.2031	Rpl21
0.2687	6.384	0.2031	Ccdc88c
-0.2838	6.439	0.2031	Dhrs3
-0.313	5.856	0.2031	Taf3
0.2901	5.904	0.2031	Scamp1
0.2564	6.254	0.2031	Sh3bgrl
0.2373	7.623	0.2033	Epc1
0.2572	6.503	0.2036	Ppara
0.3993	4.368	0.2037	Pgrmc1
0.2708	7.39	0.204	Fndc3b
0.5245	5.223	0.2043	Rasgrp1
0.6028	3.022	0.2043	Ankrd50
-0.8846	2.94	0.2044	St8sia1
-2.909	1.732	0.2044	Itga9
-0.343	4.877	0.2044	Palm
-0.3384	5.123	0.2044	Stk40
-0.2919	5.305	0.2045	Akap8
0.2665	6.643	0.2047	Hnrnpl
0.2974	7.06	0.2049	Cecr2
-0.3683	4.099	0.205	Gstt1
0.9687	1.695	0.2059	Ncapg2
-0.3909	4.405	0.207	Rnpep
0.9531	2.025	0.207	Gm12655
-0.5093	6.556	0.2081	Dbi
-0.3159	6.477	0.2081	Zfp36l1
-0.291	7.084	0.2081	Ctdspl
1.22	1.569	0.2081	Cdh6
0.5711	2.908	0.2082	Haus6
-0.6644	2.323	0.2082	Apod
-0.7101	1.95	0.2082	Sh3bp5
0.4984	3.512	0.2087	Flvcr1
0.3136	5.914	0.2088	Ttyh2
-0.5016	3.039	0.2088	Dvl1
0.4013	4.562	0.2088	Lix1l
0.8223	2.286	0.2089	Shisa2
0.4447	5.111	0.2089	Smarcd3
-0.4792	3.757	0.2089	Prdm4
0.3789	5.152	0.2089	Samd5
0.3634	4.447	0.2089	Bclaf3
-0.379	4.939	0.211	Steap3
0.2761	5.456	0.211	Oxsr1
0.8239	2.191	0.2111	Fzd10os
0.3309	4.486	0.2114	Prkci
0.8978	1.553	0.2115	Gm9725
0.6589	2.806	0.2115	Zfp973
0.3435	4.886	0.2115	Adgra3
-0.5893	2.863	0.2143	Trabd
0.5195	3.422	0.2145	Arpin
-0.2777	5.279	0.2145	Btg1
0.2625	7.061	0.2146	Elmo2
-0.8495	2.102	0.2157	Gm27021
0.3878	4.772	0.2162	Tbc1d4
-0.3531	4.835	0.2163	Snx5
0.2583	7.141	0.2169	Tmc7
1.018	1.565	0.2174	Gm16267
-0.5521	3.104	0.2174	Gm20605
-0.2546	7.129	0.2174	Tet2
-0.3409	5.201	0.2174	Dot1l
0.3924	3.887	0.2174	Mrps14
-0.2518	7.189	0.2174	Numa1
-0.7019	2.143	0.2176	Zfp273
0.2665	11.13	0.2178	Adgrb3
0.2552	7.244	0.2178	Dnmt3a
-0.3018	4.694	0.2179	Ccz1
0.7539	3.113	0.2179	Cd82
0.3491	4.502	0.2182	Gm20431
-0.4879	3.814	0.2184	Atxn1l
1.293	1.843	0.2184	Rbm46
-0.3491	4.491	0.2185	Copz1
0.5238	3.642	0.2189	Kitl
-0.5096	3.146	0.2191	Elovl1
0.2448	7.296	0.2194	Ctif
0.6878	2.68	0.2194	Gm28539
0.9516	2.015	0.2194	Tro
0.5371	3.089	0.2194	Ubald1
0.2905	5.323	0.2194	Fbxl5
0.4605	3.911	0.2194	Fam199x
1.252	2.41	0.2194	Lingo1
-0.2451	8.307	0.2194	Msmo1
0.2795	5.562	0.2194	Zbtb37
0.879	3.199	0.2194	Gsg1l
-0.5394	3.47	0.22	Eid1
0.4144	4.627	0.22	Plcd1
-0.9448	1.396	0.22	Parvaos
-0.5301	3.376	0.2201	C2cd2l
0.2819	5.269	0.2204	Sypl
-0.8763	1.61	0.2204	Dcdc5
-0.3887	3.71	0.2205	Ccdc25
-0.6636	2.334	0.2205	Pcdhga4
0.964	1.755	0.2205	A230108P19Rik
-0.2469	6.355	0.2207	Pabpn1
1.016	1.327	0.2207	Vmn2r1
-0.2582	7.339	0.2209	Dlg1
0.2756	5.33	0.221	Eci1
0.8747	1.401	0.221	Star
-0.3614	5.217	0.221	Scd1
0.647	2.549	0.221	Zfp553
-0.3383	4.968	0.2215	Cdk11b
0.895	1.245	0.2215	Tfap4
0.992	1.125	0.2215	Gm15789
0.3263	5.346	0.2215	Dram2
0.373	4.341	0.2215	1700025G04Rik
-1.751	1.777	0.2218	Cd86
-0.4956	3.052	0.2218	Sppl2b
0.4859	3.668	0.2219	Exoc3l4
0.4634	3.775	0.2219	Ubiad1
0.4653	3.155	0.2219	Mepce
0.2591	7.322	0.2219	Dner
0.2649	7.756	0.2219	Itga6
0.2715	5.87	0.2219	Tiam2
-0.8065	2.023	0.2219	6330403K07Rik
1.646	0.8891	0.2222	Gm30173
-0.5201	3.112	0.2223	Tti2
-0.516	4.066	0.2225	Rack1
-0.4588	3.811	0.2225	Scrn1
-0.4959	3.124	0.2226	Spata2
-0.3134	5.908	0.2229	Nfic
0.5433	3.603	0.2229	Hdac6
0.4073	3.734	0.2229	Zfp2
0.3772	5.383	0.2231	Masp1
-0.417	3.549	0.2231	Spag7
0.3953	4.541	0.2232	Phlpp2
0.4802	3.956	0.2232	Ppat
-0.2896	5.263	0.2237	Impa1
0.2799	5.684	0.2237	Oip5os1
-0.502	4.888	0.2243	Tgfa
-0.937	1.391	0.2246	Dmc1
-1.295	3.555	0.2246	Kif5a
-0.4099	4.284	0.2246	Cdc26
0.3046	6.556	0.2246	Nkain4
0.4158	4.923	0.2247	Cd9
1.051	1.839	0.2247	Adam32
-0.2479	6.972	0.2249	Tank
1.028	1.025	0.2252	Podxl2
-0.2968	4.91	0.2252	Cox7a2
-0.4262	3.911	0.2252	Zfp865
0.8941	1.293	0.2252	Gdpgp1
0.2715	5.347	0.2254	Dtd1
0.859	2.656	0.2263	Ppfia2
0.3727	4.356	0.2266	Trp53
0.2351	6.921	0.2266	Rbms1
-0.4455	3.45	0.2266	Slc36a1
-0.3232	4.706	0.227	Ift172
0.7094	2.28	0.2274	Zfp128
-0.7508	1.823	0.2274	Fam3a
0.6589	2.614	0.2274	Nkx6-2
-0.3212	4.301	0.228	Mrpl18
-0.3017	5.294	0.228	Frmd6
0.2476	8.115	0.228	Lypd6
-0.4755	3.777	0.228	Fmo5
-0.8042	2.608	0.2288	Rgs22
-0.2969	5.507	0.2289	Usp19
0.6949	2.683	0.2295	Slc38a7
0.7033	2.113	0.2301	Gnb4
-0.4346	4.027	0.2302	Git1
0.2665	6.744	0.2302	Phgdh
-0.6659	2.258	0.2305	Cep41
0.4322	4.145	0.2314	Abcb1b
-0.3273	5.125	0.232	Trmt1l
0.2733	6.45	0.232	Zfp827
-0.4832	3.185	0.2325	Abhd14b
-0.2654	6.008	0.2332	Ptms
-0.301	4.783	0.2332	Zc3h4
-0.2209	7.696	0.2332	Fam184a
-1.98	1.654	0.2338	Ptk2b
0.9103	6.483	0.2352	Csmd1
-0.4227	4.005	0.2352	St8sia5
-0.2932	6.791	0.2352	Crlf3
-0.2876	5.484	0.2359	Dapp1
-0.2581	5.575	0.236	Pdxdc1
-0.3793	4.484	0.2361	Rnf44
0.7352	3.868	0.2365	Vldlr
0.4198	8.283	0.2365	Gabra2
-0.3383	4.746	0.2365	Armc9
-0.2176	7.791	0.2365	Mfn1
-0.8305	1.686	0.2367	Myo1d
0.9686	7.346	0.2373	Lama3
0.9422	1.283	0.2374	ENSMUSG00000120303
0.2746	7.558	0.2376	Aldh1a1
0.4505	5.397	0.2376	Ccdc80
-0.6603	2.331	0.2376	Igf2bp3
-0.4151	4.294	0.2377	Nabp2
-0.9276	1.31	0.2377	Kcnu1
0.5258	3.573	0.2377	Gm46123
-0.4874	3.017	0.2377	Ormdl2
-0.3792	6.883	0.2377	Gse1
0.4092	4.077	0.2377	Slc18b1
0.6471	3.198	0.2386	Zfp112
0.3097	5.154	0.2387	Dtnbp1
-0.5167	2.745	0.2387	Katnb1
-0.4356	4.404	0.2396	Hsph1
0.7428	4.812	0.2396	Gm4117
1.506	1.267	0.2396	Gm45341
-0.2304	7.285	0.2397	Ahcyl2
0.819	2.853	0.2397	Cpne8
-0.3106	4.921	0.2397	Bbof1
0.7825	2.083	0.2398	Zfp810
0.2674	5.43	0.2398	B3galt5
0.8025	2.208	0.2398	Cyb5r1
0.6001	3.483	0.2398	Uap1
-0.4215	3.905	0.2398	Txlnb
-0.9005	1.653	0.2398	Nphs1os
0.32	4.444	0.24	Cdkl5
-0.2762	6.557	0.2402	Camk2n1
0.2931	4.873	0.2421	Plekhf2
0.3573	4.642	0.2423	Igf2r
-0.667	4.182	0.2425	Tmem38a
-0.2245	6.768	0.2426	Afg1l
-0.3166	5.826	0.243	Apc2
-0.3231	4.613	0.243	Kdm6b
-2.159	2.337	0.2431	Rnase4
-0.4173	3.676	0.2438	Upf3a
-0.4773	7.972	0.244	Unc13c
-0.2977	4.609	0.2442	Wdr45b
-0.7505	2.386	0.2443	Baz1a
0.3102	4.838	0.2443	Nin
0.3427	4.547	0.2443	Gm13187
-0.7862	2.117	0.2443	Gm47423
-0.5237	3.188	0.2451	Fzd5
0.3833	3.869	0.2452	Slc25a28
0.3017	5.989	0.2457	Lonrf3
0.2996	4.761	0.2457	Alkbh3
-0.8195	2.034	0.2457	Naa38
-0.3479	6.55	0.2464	Slc10a7
-0.8511	1.283	0.2464	Gm29107
0.3316	4.312	0.2464	Mapkbp1
0.2536	5.312	0.2464	Blcap
0.7462	2.704	0.2465	Rwdd3
0.3355	5.011	0.2473	Bmp1
0.2567	5.784	0.2481	Slc12a4
-0.4439	4.312	0.2481	Gm38071
0.3261	5.289	0.2481	9330188P03Rik
-1.417	5.089	0.2481	Irs2
0.4374	3.814	0.2481	Zfp458
-0.5668	3.051	0.2483	Ninj2
-0.3326	5.057	0.2483	Dnajc8
0.9233	2.265	0.2483	Gm30655
0.2198	10.06	0.2483	Slc6a11
-0.25	9.23	0.2483	Pde8b
0.5545	2.807	0.2483	D630024D03Rik
-0.7144	4.261	0.2483	Cacna1a
-1.907	1.524	0.2483	Rin3
-0.8386	1.548	0.2483	Gm10419
0.7373	1.642	0.2484	ENSMUSG00000120055
0.3907	4.512	0.2484	Smarcal1
0.4854	3.249	0.2488	Klhl25
0.3223	5.071	0.2488	Taf1b
0.512	3.513	0.2488	Glce
0.5064	3.103	0.2488	Gm14634
0.805	1.7	0.2488	Prdm9
-0.4429	7.371	0.2488	Aff1
-0.2377	6.961	0.2488	Slc25a3
-0.2549	5.492	0.2489	Tor1aip2
0.2851	6.537	0.2489	Pea15a
0.672	2.34	0.249	Gm13832
0.2505	6.473	0.2494	Zfp445
0.3657	5.403	0.2494	Nat8f6
0.9827	1.026	0.2494	9330133O14Rik
0.632	3.013	0.2494	9630001P10Rik
0.3885	3.984	0.2494	Msantd3
0.4702	3.674	0.2494	Ckap4
0.328	5.363	0.2494	Lgalsl
-0.5233	2.892	0.2494	Ap5z1
-0.4355	3.865	0.2494	Cplx2
-0.2627	6.361	0.2494	Nr2e1
-1.375	5.351	0.2494	Gm9750
0.6656	2.808	0.2494	Fzd10
0.2512	12.7	0.2494	Ntm
0.2639	5.337	0.2494	Aifm1
0.5538	2.838	0.2494	Gm20008
-0.5524	2.697	0.2494	Lrrc2
-1.388	2.688	0.2494	Gm48770
-0.4125	3.838	0.2494	Rps29
0.4131	4.268	0.2494	Kank2
-0.7675	1.738	0.2494	Alkbh4
0.3723	3.901	0.2494	Tnpo2
-0.5543	2.914	0.2494	Acp1
-0.804	1.376	0.2494	Thsd4
0.7811	2.268	0.2494	1110046J04Rik
0.2455	9	0.2494	Fnbp1
0.5298	3.311	0.2494	Abcc10
-0.8558	1.866	0.2494	Camk2a
-0.3107	4.893	0.2494	Dusp6
-0.3978	4.341	0.2494	Bpnt1
0.3581	4.164	0.2497	Atosb
-0.6332	1.827	0.25	Irf1
-0.9701	2.793	0.2502	2610005L07Rik - ENSMUSG00000071793
1.277	1.51	0.2502	Otc
0.7967	1.654	0.2502	Orc1
0.8505	1.835	0.2502	Zcchc3
-0.45	3.812	0.2503	Wdr81
0.8803	2.491	0.2503	Smarca1
0.461	3.934	0.2503	Tmem185a
-0.2194	6.6	0.2503	Ranbp9
-0.3341	4.655	0.2503	Slx4ip
-0.5189	4.307	0.2505	Atp5mpl
-0.3496	4.329	0.2505	Thumpd3
0.5552	2.864	0.2506	Zbtb2
0.3759	6.41	0.2508	Dgki
-0.3401	4.923	0.2509	Ptbp3
-0.8441	1.879	0.2509	Pkd2l2
-0.5175	3.053	0.2509	Rhbdl3
-0.4009	4.698	0.2509	Ppp5c
-0.4518	2.983	0.2509	Slc39a3
1.204	0.8219	0.2509	ENSMUSG00000120632
0.2741	5.434	0.2513	Bcap29
-0.2792	5.411	0.2513	Thoc1
-0.5177	9.263	0.2513	Paqr8
-0.4721	3.258	0.2513	Map4k2
-0.3136	7.944	0.2516	Hsp90b1
-0.2238	6.84	0.2516	Smg1
-0.5337	3.124	0.2521	Cav2
0.4465	3.513	0.2521	Fzd8
-0.6122	2.044	0.2521	Saysd1
-0.61	2.248	0.2521	Gm13830
0.6886	2.727	0.2521	Sord
0.5414	3.052	0.2521	Stard4
-0.2514	7.422	0.2524	Ncor2
1.012	1.463	0.2524	Dusp10
0.4744	3.465	0.2524	Iqch
-0.2866	6.801	0.2524	Dlc1
0.7108	2.304	0.2524	Gm17114
-0.2459	5.567	0.2524	Ccnl1
0.9049	1.414	0.2524	Art3
-0.5532	2.473	0.2524	Sipa1
0.2924	8.169	0.2527	Slc38a3
-0.4086	3.412	0.2532	Tspan32os
0.328	5.518	0.2537	Gm45844
-0.474	3.152	0.254	Atxn7l2
-0.4609	3.969	0.254	Rnf187
-0.5749	2.187	0.2544	Zfp628
0.453	3.836	0.2547	Arxes2
0.2498	6.702	0.2549	Sertad2
-0.366	3.994	0.255	Cibar1
0.4394	4.019	0.255	Egfl6
-0.826	1.931	0.2557	6330576A10Rik
-0.4383	7.429	0.2557	Bcar3
-0.6348	2.755	0.2557	Cadps
0.6738	2.034	0.2557	Spata5l1
0.3573	3.931	0.256	Qsox1
-0.7818	1.529	0.2563	Acd
-0.2269	6.331	0.2568	Rap1gds1
-0.6181	2.672	0.2568	Apobec1
0.3895	4.008	0.2576	Pole4
-0.9131	2.393	0.2577	Pald1
0.4462	3.843	0.2577	Bloc1s5
-0.3613	4.738	0.2579	A330076C08Rik
-0.3024	4.958	0.2579	Cep162
-1.497	1.482	0.2579	Mafb
-0.4534	3.287	0.2579	Ppox
0.2916	5.072	0.2579	Dlg3
-0.3675	3.913	0.2579	Oxnad1
-0.3508	4.349	0.2579	Tspoap1
0.2506	6.736	0.2582	Enox1
0.5905	2.436	0.2582	Mad2l2
0.2523	5.461	0.2583	Ephb3
-0.5724	3.079	0.2588	Snhg20
0.3343	4.278	0.2588	Fam20c
-0.7482	2.414	0.2588	2210016F16Rik
-0.5147	2.769	0.2588	Unc13a
-0.2467	7.32	0.2588	Dlg5
-0.2605	6.8	0.2591	Paqr7
-0.2291	7.501	0.2591	9430041J12Rik
-0.2181	6.403	0.2591	Myrip
0.5082	2.87	0.2591	Gm26660
-0.5751	2.134	0.2591	Sh3d21
0.566	3.372	0.2595	Tsen15
-0.3776	4.209	0.2596	Dnajb2
0.2227	7.482	0.2599	Elp4
-0.2299	7.212	0.2599	Tle1
0.6469	5.377	0.26	Mmp16
-0.2387	5.461	0.26	Katnip
-0.3182	4.184	0.26	Ppp1r37
-0.6864	3.15	0.26	Rpl22l1
-0.8709	1.588	0.26	Fam81a
0.343	4	0.2602	Ube2j2
0.3214	4.284	0.2602	Fam210a
-1.22	6.766	0.2603	Tsc22d3
0.732	1.77	0.2603	Gm31323
-0.2843	5.595	0.2603	Amd1
-0.732	1.711	0.2603	Tmcc3os
-0.4749	8.944	0.2604	Kcnn2
-0.2039	7.133	0.2609	Cep350
0.5176	2.658	0.2609	Prps1
-0.7049	1.38	0.2611	ENSMUSG00000121482
0.3205	4.633	0.2611	Rabgef1
-0.3038	5.49	0.2612	Srsf6
-0.3968	3.761	0.2612	Alg12
-0.2717	5.605	0.2612	Wipf2
-0.4146	8.707	0.2615	Zhx3
-0.471	2.815	0.2618	Slc35e1
-0.7731	1.54	0.2619	Cercam
0.392	4.084	0.2619	Triqk
0.2838	5.001	0.2619	Ubap1
0.3232	5.186	0.2619	Fgfrl1
0.4997	3.331	0.2619	Zkscan2
0.49	3.421	0.2619	A230072C01Rik
0.222	6.992	0.2619	Nova1
0.3111	4.756	0.2619	Usp11
-0.4395	3.635	0.2619	Apobec3
0.4789	3.308	0.2619	Mtres1
0.3477	4.386	0.2619	Trim3
-2.147	3.475	0.2619	Slc24a4
-0.2874	5.324	0.2619	Ik
0.3338	4.194	0.2619	Sacs
-0.3686	3.833	0.2619	Orc6
-0.4525	3.214	0.2619	Gm26782
-0.8319	1.275	0.2619	Borcs6
-0.7613	1.643	0.2619	Fhad1
-0.5998	2.613	0.2619	Spink10
-0.5101	2.429	0.2619	4930599N23Rik
-0.4329	4.556	0.2619	Aven
-0.5076	2.794	0.2621	Jmjd4
-2.48	1.659	0.2621	Slc7a8
0.3308	4.557	0.2624	Entrep1
0.5446	2.493	0.2624	Csrnp2
-0.2863	5.516	0.263	Zer1
-0.8472	1.848	0.263	Prag1
-0.4886	2.823	0.2637	Il1r1
0.2531	6.463	0.2637	Ttc23
-0.2469	5.557	0.2638	Uggt1
-0.2872	5.206	0.2638	Gm7967
-0.5195	2.585	0.264	Med10
0.3677	4.084	0.264	Naa40
-0.7503	1.387	0.264	Nbl1
-0.5136	2.646	0.2647	Asb6
-0.3906	3.606	0.2647	Pltp
-0.8791	2.273	0.2648	Edil3
0.3722	4.48	0.2655	Endod1
-0.2733	5.392	0.2655	Adipor2
-0.46	3.074	0.2655	Usf1
-0.3808	3.624	0.2658	Osbpl7
0.4759	3.028	0.2658	2410002F23Rik
-0.6525	2.011	0.2658	Mthfr
0.3701	4.888	0.2658	Rxylt1
-0.8452	1.933	0.2658	Car14
0.3791	4.307	0.2658	Ucp3
0.2945	5.85	0.2662	Pax6
0.368	5.075	0.2663	Tmem176a
0.2322	6.162	0.2665	Rsu1
-0.211	6.855	0.2665	Acin1
-0.3206	4.153	0.2665	Usp31
0.5845	2.408	0.2665	4930505G20Rik
-1.831	6.963	0.2665	Kcnk1
0.5851	2.786	0.2665	Sh3yl1
-0.251	6.407	0.2665	Susd6
0.3359	5.234	0.2666	Slc14a1
0.4031	3.406	0.2671	Gm12224
1.035	1.806	0.2671	Eno1b
-0.3922	6.009	0.2671	Rhob
-0.3231	5.041	0.2671	Zfp182
0.4273	3.748	0.2685	Mars2
-1.528	2.293	0.2685	Rasgrp3
-0.5304	2.495	0.2685	Morn2
-0.2775	5.511	0.2685	Pls3
-0.7184	2.262	0.269	Ovca2
-0.3186	4.56	0.269	Gpx4
-0.3192	4.789	0.2694	H3f3b
0.2486	5.844	0.2694	Prkaa2
0.4276	4.031	0.2694	L2hgdh
-0.7116	1.973	0.2695	ENSMUSG00000119991
0.2447	13.11	0.2695	Gpc5
-0.582	2.518	0.2695	Gm10658
-0.2502	7.376	0.2695	Plcd4
1.25	4.764	0.2695	D030055H07Rik
0.3554	3.835	0.2696	Sav1
-0.3679	3.659	0.2696	Dnaja4
0.2346	5.679	0.2696	Zfp592
0.3453	5.686	0.2696	Etv4
-0.6001	2.245	0.2696	Lsm5
-0.2099	7.767	0.2696	Dnajc1
0.3142	4.854	0.2696	Snap47
-1.77	0.8062	0.2696	Slco4a1
0.7104	2.699	0.2696	Niban2
0.4718	3.433	0.2696	Bri3
0.669	1.865	0.2701	Gtpbp6
0.2672	5.92	0.2701	Nphp3
-0.9528	4.368	0.2701	Retreg1
-0.6829	1.921	0.2701	Prkab1
-0.3872	3.369	0.2708	1810058I24Rik
-0.3314	4.233	0.2708	Hgs
-0.2513	6.133	0.2716	Eprs
0.252	6.862	0.2716	Arhgef9
-1.888	3.832	0.2717	Pde3b
0.8963	1.225	0.2717	Lratd1
-0.2726	4.728	0.2717	Psmd4
-0.7661	1.619	0.2717	2810405F17Rik
0.3329	5.113	0.2722	Nat8f1
-0.4552	6.657	0.2722	Plce1
0.7174	2.119	0.2724	Rnaseh2b
0.644	2.599	0.2727	Bcam
0.364	3.83	0.2727	Rnf149
0.626	2.352	0.2727	Cadps2
0.3282	5.686	0.2727	Rgcc
-0.602	2.507	0.2727	Alg8
0.2343	6.224	0.2727	Pcnx
0.2629	6.513	0.2727	Diaph3
0.3806	3.508	0.2728	Rrs1
0.5509	2.924	0.273	Taf5l
0.2495	8.814	0.2731	Timp3
0.2638	6.389	0.2731	Cpeb1
0.2856	4.735	0.2732	Selenoi
0.2615	4.949	0.2732	Glb1
0.2928	9.332	0.2733	Ctnna2
-0.4081	3.783	0.2738	Hspb8
0.2231	6.485	0.2741	Ankib1
0.4701	3.551	0.2741	Mmp15
0.6944	2.479	0.2745	Gm15506
0.2624	5.697	0.2752	Smad2
-0.4194	3.063	0.276	Rassf3
-0.4439	3.652	0.2761	Fam229b
0.2458	6.554	0.2762	Snx25
-0.2728	5.023	0.2764	Cnot6
-0.4845	3.948	0.2774	Mbd3
-0.4027	3.193	0.2777	Gm16066
0.3887	3.655	0.2778	Zfp948
-0.9204	1.413	0.2783	Susd1
0.3748	8.27	0.2785	Fhit
-0.2755	5.635	0.2785	Lgr6
-0.6683	2.074	0.2785	Nfkb2
-0.4641	3.752	0.2785	Cep89
-0.3432	4.537	0.2786	Nphp1
-0.2973	4.904	0.2786	Clasrp
0.4727	3.191	0.2786	Gm32856
0.3014	5.247	0.2786	Rnf139
-0.2599	5.1	0.2786	Nxf1
0.6278	2.611	0.2786	A230072E10Rik
0.2427	6.919	0.2786	Pclo
-0.4116	3.766	0.2791	Ftsj1
0.3523	3.777	0.2798	Zfp687
-1.711	2.013	0.2798	Lcp1
-0.3105	4.387	0.2798	Sem1
0.3589	4.315	0.28	Ccm2
0.4276	3.536	0.28	1700028E10Rik
-0.5316	3.165	0.28	Bbs1
-0.2721	5.084	0.2805	Anapc16
0.4293	3.103	0.2805	Inca1
0.9912	1.168	0.2808	Chst9
-0.3861	3.494	0.2808	A630072M18Rik
-0.6029	2.088	0.2808	Ube2s
-0.7182	1.63	0.2808	Acnat1
-0.2419	7.081	0.2808	Hivep1
-0.4527	5.676	0.2808	Mxd4
-0.3128	4.205	0.2808	Tubgcp2
-0.5671	2.436	0.2813	Crocc
0.3035	8.397	0.2814	Tmtc2
-0.8591	5.16	0.2814	Tmsb4x
0.2141	7.766	0.282	Large1
-0.3353	4.478	0.2833	Them4
0.2189	7.749	0.2833	Lamp2
-1.868	3.169	0.2834	Chn2
-0.5874	3.487	0.2834	Nalf1
-0.4065	4.242	0.2836	Hspe1
0.4754	5.92	0.2841	Phf21b
0.7124	2.889	0.285	Efnb2
-0.8706	4.19	0.285	Golm1
0.2286	6.251	0.2851	Tmem229a
-0.5758	5.068	0.2851	Ugt1a6a
-0.2615	5.07	0.2855	Cgrrf1
-0.9445	1.474	0.2855	Gm44250
0.2652	4.936	0.2855	Zfp664
-0.6077	6.84	0.2855	Usp53
0.6181	2.613	0.2856	1110059G10Rik
-0.5045	2.63	0.2859	Mcrs1
0.5031	2.626	0.2859	Gemin2
0.4072	4.507	0.286	Gm31166
-0.4991	4.159	0.286	Zim1
0.6334	2.065	0.286	ENSMUSG00000120497
0.71	2.022	0.2861	Otub2
-0.7988	1.885	0.2861	Fgd3
-1.528	4.589	0.2861	P2ry12
0.4897	3.017	0.2865	Rad18
0.3409	5.44	0.2865	Mtcl1
-2.275	0.8453	0.2865	A630001G21Rik
1.064	1.46	0.2865	Sh2d4b
0.3068	4.823	0.2866	Styx
-0.2144	9.819	0.287	Hdac8
-0.4676	5.351	0.2876	Manf
0.229	6.843	0.2877	Acss2
3.119	0.8518	0.2878	Ntng1
-0.4096	4.467	0.288	Pkig
-0.4768	2.627	0.288	Use1
0.2395	5.538	0.2883	Clcn6
0.2811	5.842	0.2883	Cpeb2
-0.2937	5.937	0.2885	Mtarc2
-0.4357	2.832	0.2885	Mzt2
0.769	1.784	0.2885	Gm16740
-0.3945	3.702	0.2885	Vma21
-0.2008	8.149	0.2885	St3gal4
-0.5239	2.305	0.2885	Adgrf5
0.3212	4.649	0.2885	Adss
-0.3847	3.748	0.2885	Cryab
-0.2504	5.646	0.2885	Tbc1d9b
-0.2165	6.413	0.2896	Nup98
0.2422	6.056	0.2896	Gpbp1l1
0.5366	3.037	0.2897	Rfesd
-0.2221	6.209	0.2906	Arhgef19
0.5051	2.695	0.2907	1700080N15Rik
0.234	6.566	0.2908	Klhl24
-0.3267	4.846	0.2908	Cep112
0.2927	4.598	0.2909	Bckdha
-0.4156	3.365	0.2909	Lmln
0.6184	1.906	0.2909	Eef1aknmt
0.327	5.454	0.2911	4930570G19Rik
-1.754	2.817	0.2911	Fyb
-0.2706	5.374	0.2911	Zfp652
-0.2867	5.338	0.2911	Sod1
-0.2177	6.802	0.2911	Dip2b
0.7466	2.456	0.2911	Rasgef1b
0.1956	7.971	0.2911	Sybu
0.3086	4.783	0.2912	Slc22a5
-0.5317	2.776	0.2913	Ptp4a1 - ENSMUSG00000026064
-0.244	5.535	0.2916	Kantr
0.5173	2.861	0.2916	Atxn7l3
-0.377	4.283	0.2916	Cherp
0.2393	5.926	0.2916	Vmp1
-0.597	1.863	0.2916	D130007C19Rik
-0.308	4.144	0.2916	Dctn5
0.2906	4.546	0.2918	Hsf2
0.2433	6.737	0.2923	Pigk
0.4975	3.313	0.2923	Ano8
0.2	6.821	0.2926	Fat1
0.3004	4.755	0.2926	Mospd2
-0.5983	4.835	0.2926	Id3
-0.4749	2.613	0.2926	Tmco6
-0.2314	6.002	0.2926	Tbc1d32
-0.2679	5.487	0.2926	Apln
0.5349	5.871	0.2926	B3galt2
0.2093	8.942	0.2928	Glud1
0.8263	1.667	0.2929	Itga3
0.4131	3.868	0.293	Exd1
-0.2012	8.967	0.2934	Clasp2
-0.2829	4.712	0.2934	Cfap418
-0.4841	2.809	0.294	Ten1
0.4167	3.62	0.294	Gm20687
0.8467	1.429	0.294	Gm20536
0.2815	4.707	0.2942	Bmerb1
-0.3595	3.998	0.2945	Sbno2
-0.6201	2.304	0.2945	Rbbp8
-0.2975	4.662	0.2945	Erg28
-0.4698	3	0.2945	Eif1a
0.5476	2.732	0.295	Cdc25b
0.6064	4.72	0.2953	Slc2a13
-0.4284	3.255	0.2957	Isg20l2
-0.3708	4.616	0.2961	Zfp157
-0.2576	7.232	0.2961	Atp1b1
-0.4997	2.737	0.2966	Hoga1
-0.5644	2.341	0.2966	Exosc8
0.747	1.349	0.2966	4933404O12Rik
0.3404	4.438	0.2966	Dtx4
-0.5685	8.986	0.2966	Kcnq3
-0.3287	4.081	0.2966	Atp5l
-0.5271	4.137	0.2966	Plek
-1.021	2.785	0.2966	Hsf3
-0.2182	9.523	0.2966	Dab1
-0.5456	4.361	0.2966	Rxra
-0.7987	3.702	0.2966	Gm4804
-0.5026	2.635	0.2966	Plppr2
0.3407	5.018	0.2968	Sod3
0.3375	4.341	0.2971	Slc35b4
0.3928	3.734	0.2974	Ubxn8
0.2508	6.019	0.2974	Hsdl2
0.4688	3.45	0.2978	Rccd1
-0.4336	3.499	0.2984	Ankzf1
-0.4687	2.986	0.2987	Lpin3
0.2058	6.518	0.2988	Tlcd4
1.274	1.059	0.2989	Slc14a2
0.6319	2.28	0.2991	Lrrc69
-0.7703	1.518	0.2992	Incenp
-0.2325	5.439	0.2994	Pfkfb4
-0.1968	7.049	0.2995	Spen
0.9456	1.317	0.2995	Setmar
-1.696	1.547	0.2996	Bank1
-0.2518	6.035	0.2996	Ssb
0.2358	6.792	0.2996	Fam120c
0.4824	3.136	0.2996	Rtel1
-0.2746	5.452	0.2998	Gm48742
0.7471	1.496	0.2998	Gm37768
0.3317	4.711	0.3002	Eif1ax
0.3316	4.602	0.3002	Plxna1
0.2329	5.627	0.3023	Gls
0.3148	7.699	0.3027	Gstm1
-0.4265	3.423	0.3027	Zfp141
0.3475	5.257	0.3031	Pir
-1.305	2.336	0.3031	AU020206
0.3664	3.722	0.3031	Tmcc2
-0.2371	5.808	0.3036	Marchf2
0.219	6.728	0.3036	Fer
0.2544	6.344	0.3036	Hadhb
-0.2453	4.894	0.3036	Atp5md
-0.344	4.405	0.3036	Fez2
-0.277	4.627	0.3036	Dhx8
-0.4949	3.156	0.3036	Zfp428
-0.4668	3.383	0.3036	Pgs1
0.2392	5.684	0.3036	Asxl1
0.3673	4.883	0.3036	Cyp20a1
-0.5928	1.901	0.3036	Gm20696
0.4992	2.694	0.3036	Txnrd3
0.8511	2.19	0.3036	Epb41l4a
-0.3782	3.325	0.3036	Tctn1
-0.4402	2.855	0.3036	Mcrip2
0.3957	3.936	0.3036	Dnajc21
0.2409	8.179	0.3036	Camta1
-1.808	2.44	0.3038	Ptprc
-0.2595	6.465	0.3038	Ikzf2
0.2793	6.015	0.3038	Sobp
1.154	1.193	0.3038	Bcl2l15
-0.3541	3.519	0.3038	Ddx18
-0.4209	5.354	0.3038	Tuba1a
-0.7625	1.716	0.3045	Polr1has
-0.198	6.972	0.3047	Nisch
0.8034	1.666	0.3048	Trappc2l
-0.567	2.496	0.3048	Slc40a1
0.2637	5.788	0.3048	Ildr2
-0.4906	3.054	0.3049	Odad1
-0.6363	1.784	0.3055	Ackr3
0.2016	6.591	0.3055	Ogdh
-0.195	6.509	0.3055	Baz1b
0.3863	3.768	0.3055	Rbpms2
0.4249	3.141	0.3055	Nrbf2
0.4324	3.919	0.3055	Akap17b
0.321	4.086	0.3055	Gars
0.2517	7.176	0.3055	Chrdl1
0.4069	3.692	0.3056	Faxc
-0.6978	1.456	0.3056	Pole
-0.1913	6.301	0.3056	Fxr1
-0.2417	6.135	0.3057	Cert1
0.7748	1.193	0.3066	Mrm2
-0.5635	2.192	0.3066	Tomm5
1.042	2.043	0.3066	Megf11
0.3019	6.666	0.3073	Galnt16
-0.7072	1.661	0.3073	1500026H17Rik
-0.3325	6.875	0.3074	Omg
0.4681	4.027	0.3074	Alms1-ps2 - ENSMUSG00000090098
0.9477	1.079	0.3074	Gm9930
0.4991	3.649	0.3078	Hspbap1
0.3863	3.808	0.3079	Ebf4
0.2879	4.573	0.308	Zfp799
0.1962	6.898	0.3086	Tsc22d1
0.2705	5.122	0.3086	Tmem167
0.2623	6.109	0.3086	Hspa9
0.7196	1.795	0.3086	Zscan30
0.2202	5.618	0.3086	Rimoc1
0.381	4.59	0.3088	Cux2
0.4989	2.748	0.3092	Zfp382
0.2418	5.625	0.3094	Clcn4
-0.3627	3.788	0.3104	Spice1
0.2258	10.19	0.3116	Pcdh7
-0.3451	4.223	0.3119	Shisa5
0.2473	10.45	0.3123	Negr1
0.4476	3.117	0.3123	Tyro3
-0.3969	3.564	0.3123	Rpl18
-0.4662	3.936	0.3125	Mvd
-1.28	1.639	0.3133	Rbm47
-0.5644	7.815	0.3138	9330159F19Rik
-0.625	2.22	0.3143	Tlcd3a
-0.782	3.803	0.3143	Tmem254
0.6843	3.093	0.3143	Tspan18
0.4564	2.917	0.3143	Eml3
-0.7696	1.744	0.3143	Olfml2b
0.2734	5.232	0.3144	Nsd2
0.7622	1.603	0.3144	Adamts5
-0.7175	2.135	0.3144	Elf4
0.3723	3.853	0.3146	Znhit6
-0.471	3.33	0.3146	Emg1
0.7755	2.859	0.3146	Galnt17
0.1824	7.558	0.3146	Acaca
-0.3373	8.013	0.3146	Foxo1
-0.4475	3.26	0.3146	Cacna1c
-0.3862	3.345	0.3146	Mfap1a
-0.2825	4.976	0.3146	Ncoa3
0.354	3.768	0.316	Zfp787
-0.2783	5.406	0.316	Gpatch1
-0.6992	1.415	0.316	Gdap1l1
0.2363	8.753	0.316	Tmem164
-0.3402	3.87	0.3162	Tcof1
0.2952	4.353	0.3162	Rragc
-0.5838	2.7	0.3164	Ank1
-1.504	3.492	0.3165	Dock8
0.2211	7.442	0.3167	Tcf7l1
[truncated: 55,011 more rows]

## Sheet: DE-2_Astrocytes
logFC	AveExpr	p_val_adj	gene_names
-2.34	6.663	0.0008207	Pde10a
4.899	4.209	0.0008207	Gm48606
-3.673	4.206	0.01266	Fam163a
-2.477	4.435	0.06036	Crym
-2.535	3.334	0.06528	Egfem1
1.63	6.282	0.06528	Ptchd4
-1.384	5.916	0.07391	Mbp
1.846	4.271	0.07391	Brinp2
1.392	6.071	0.07657	Rbms3
-2.388	4.041	0.07657	Rpph1
1.356	4.645	0.07657	Hs3st3a1
-1.092	6.273	0.09459	Aldh7a1
-0.9902	7.409	0.09646	Rgma
1.402	5.923	0.09646	Lama3
1.553	4.157	0.1111	Nopchap1
1.595	4.154	0.2134	Adamts1
1.058	7.842	0.2162	Hdac9
-1.004	5.832	0.2162	Map3k19
-1.005	5.343	0.2162	Slc25a33
1.47	5.255	0.2513	Hes5
-1.063	5.613	0.2696	Acsf2
1.364	4.962	0.2696	Gm49342
-0.9479	6.689	0.2696	Ide
-1.873	3.751	0.2696	Sema7a
-0.9452	6.822	0.2696	Hdac4
1.042	5.225	0.2696	Arhgef28
-0.9425	6.543	0.2696	Unc13c
1.412	4.751	0.2696	Hectd2os
1.267	4.327	0.2696	Ttc39c
-1.318	4.501	0.2696	St6galnac3
1.163	5.813	0.2785	Nme7
-1.685	3.87	0.2908	Tmeff2
1.916	4.047	0.2908	Wdfy1
-1.75	4.162	0.2908	Mobp
-2.003	4.243	0.2908	Rpe65
1.094	4.989	0.2908	A930017M01Rik
1.079	5.689	0.2908	Flrt2
1.393	3.884	0.2908	Nox1
0.856	6.177	0.2938	Aox1
-0.9865	8.433	0.3014	Dio2
1.613	4.066	0.3014	Dgkh
-0.8452	6.805	0.3019	Phactr1
-1.405	4.706	0.3019	Ccn1
-0.6896	13.53	0.3019	mt-Rnr2
-0.7793	13.12	0.3019	mt-Rnr1
1.325	4.921	0.3186	Mcph1
-1.145	4.525	0.3197	Gm54867
1.005	4.771	0.3226	Bzw2
-1.606	3.707	0.3226	Prr5l
-1.303	3.944	0.3226	Rap1gap
0.9562	8.228	0.3226	Fgf14
-0.7605	7.737	0.3226	mt-Co1
-0.7774	7.62	0.3226	Kcnq3
1.183	3.975	0.3226	Angpt1
0.9536	4.673	0.3226	Ripor2
-0.8867	6.152	0.3226	Hspa2
1.346	3.903	0.3226	E130102H24Rik
0.7234	5.838	0.324	Rab3gap2
-0.7198	6.442	0.3261	Adam23
0.9717	6.456	0.3313	Mmp14
-1.02	4.832	0.3315	Steap3
0.7814	6.328	0.3315	Ppt1
0.8468	5.858	0.3415	Tnfaip8
1.292	3.704	0.3489	Gmpr
-0.8055	6.74	0.351	Mxi1
-1.412	3.853	0.351	Afap1l2
-0.8959	6.46	0.3526	Rcan2
0.9249	5.3	0.3528	Nnt - ENSMUSG00000025453
1.102	4.402	0.3528	9330188P03Rik
-1.357	3.858	0.3528	A730056A06Rik
1.14	5.025	0.3528	Pkia
-1.23	4.269	0.3528	Hacl1
-1.002	5.833	0.3528	Manf
-0.7866	6.205	0.3533	Tmem100
0.8905	5.096	0.3533	Tmem51
-0.6383	7.564	0.3583	Fam20a
-0.7668	9.223	0.3697	Gm19951
-1.229	4.162	0.3697	Klhl29
1.36	4.537	0.3742	Gm45846
-0.7677	7.193	0.3742	Akap6
0.8987	5.716	0.3742	Tsc22d2
1.701	3.901	0.3742	Creb5
-1.525	3.908	0.3742	Rundc1
0.7416	9.028	0.3742	Lrp1b
0.8285	6.705	0.3742	Neat1
-2.669	4.696	0.3742	Atp8a2
-1.389	4.289	0.3742	Mrpl51
-0.685	6.874	0.3742	Utp14b
0.8439	6.911	0.3864	Dcc
-1.51	4.206	0.3871	Slc25a21
-1.011	4.074	0.3871	Gstt1
-1.716	3.643	0.3871	Pcsk1n
1.001	4.57	0.3871	Ccdc82
-0.7445	5.457	0.3871	Sorbs2
-0.7771	8.779	0.3871	Hspa8
-0.994	4.377	0.3871	Nsmf
-0.89	4.468	0.3871	Rps3a1
-1.283	4.001	0.3871	Mepce
1.031	8.059	0.3884	Fars2
0.7107	7.2	0.3893	Chst11
-0.9117	5.304	0.3909	Trappc13
1.164	4.15	0.3925	Grm5
-1.097	3.834	0.3939	Naa10
0.7896	6.325	0.3939	Gm26512
-0.9565	4.938	0.3995	Ift74
0.8795	5.003	0.3995	Dusp16
-0.714	6.396	0.3995	Usp2
1.379	4.267	0.3995	Gm29683
1.686	3.334	0.4126	Naa40
-0.7943	6.854	0.4142	mt-Nd2
-0.6833	8.323	0.4142	Paqr8
1.091	4.556	0.4142	Cd82
1.1	4.031	0.4164	Cdyl2
0.8899	4.675	0.4171	Gm45847
-0.603	8.156	0.4221	mt-Cytb
1.183	3.738	0.4221	Casp3
0.5889	7.115	0.4221	Ccdc141
-1.241	3.75	0.4221	Odc1
-1.729	6.638	0.4221	Etnppl
0.9264	4.523	0.4221	Gucy1a2
1.108	4.482	0.4272	Nup93
0.7573	6.029	0.4352	Rhobtb3
0.7576	5.742	0.4352	Nln
-0.7691	8.438	0.4357	Hspa5
0.7104	5.703	0.4373	Snx12
0.916	5.542	0.4373	Gabra4
-0.7894	5.788	0.4534	Stxbp6
-0.7356	7.814	0.4564	Rgs7
-0.6253	5.735	0.4566	Rps23
-1.153	6.058	0.4676	Gm40578
-1.598	3.866	0.4676	Pex5l
2.655	3.52	0.4676	Rasgef1b
0.9216	5.383	0.4676	Zc3h7a
-0.8713	6.169	0.4676	Hsd11b1
-0.8321	5.28	0.4678	Prr5
1.5	3.475	0.4678	Prkra
-0.6057	7.723	0.4678	Vcl
0.8835	5.304	0.4718	Chl1
-0.7508	4.929	0.4718	Emc8
0.73	5.334	0.4718	Snx4
-1.114	4.366	0.4755	4833420G17Rik
1.041	4.735	0.476	Rabgef1
-0.9612	4.349	0.4868	Nop53
0.918	4.142	0.4868	Ubxn2b
-1.044	4.513	0.4868	Gm10125
0.6552	6.433	0.4868	Ubr3
0.8496	4.71	0.4868	Gpc4
-0.8193	4.925	0.4868	Oscp1
0.5054	9.31	0.4868	Grid2
-0.8123	5.393	0.4868	Emx2
0.7042	7.373	0.4868	Efr3b
-0.815	5.567	0.4868	Xbp1
1.202	3.708	0.4868	Vat1
-0.7548	5.508	0.4868	Zc3h7b
0.9396	5.497	0.4868	Epha4
0.8768	5.108	0.4868	Ntrk3
0.6161	6.306	0.487	Usp8
-1.178	4.254	0.4891	C030005K06Rik
-1.157	4.363	0.4891	Hspb8
1.061	4.532	0.4891	Pde7a
1.072	4.347	0.4891	4930570G19Rik
1.034	5.323	0.4891	Adcy8
1.111	3.893	0.4891	Simc1
0.7508	5.038	0.4891	Colgalt2
-0.7578	6.858	0.4891	9330159F19Rik
1.78	3.363	0.4891	Clic1
-0.6881	5.9	0.4891	Ppp1r3c
-0.9478	5.552	0.4891	Thrsp
-0.9926	5.168	0.4891	Uqcr10
-0.69	9.21	0.4917	Ndrg2
1.326	3.887	0.4968	Gdpd2
-0.7415	5.471	0.5197	Prkaca
0.7082	6.165	0.521	Ankib1
-0.5438	7.265	0.5271	Fgd6
-0.7654	6.444	0.5289	Pdia6
-0.9014	4.57	0.5484	Rps26
-1.085	3.919	0.5505	Ttll7
-0.837	5.291	0.5521	Crkl
-0.8024	5.189	0.5553	Pdgfd
-0.8331	6.117	0.5563	Gpt2
0.635	6.995	0.5571	Gabra2
-0.748	4.479	0.5584	Ppp4r2
0.7664	4.919	0.5584	Plxna2
-0.9879	5.046	0.5584	Septin5
-0.7027	5.739	0.5584	Sf3a1
0.8383	4.486	0.5584	Fbxo10
-0.6035	6.272	0.5584	Usp53
0.9548	4.656	0.5584	Slc35a3
-0.8855	5.797	0.5584	Enpp2
0.6519	5.407	0.5584	Plekhf2
-0.7173	4.785	0.5584	Ap3s2
0.8493	4.512	0.5584	Ptpn23
-0.7708	6.468	0.5584	Pdia4
1.494	3.691	0.5584	Utp14a
0.6692	6.292	0.5584	Senp7
1.06	3.954	0.5584	Chd1l
-0.68	4.899	0.5584	Taok2
-0.6558	5.665	0.5584	Ap3m1
0.7428	6.086	0.5638	2210408I21Rik
-1.086	4.047	0.5651	Ccdc28b
-0.9059	4.741	0.5651	Bace1
-0.973	4.422	0.5651	Acaa1a
0.6671	7.955	0.5651	Ctnna2
0.5741	6.761	0.5666	Ube2e2
0.7772	5.9	0.5666	Jun
-0.7739	9.794	0.5666	Fam107a
-0.6318	5.557	0.5666	Irf2bp2
0.5933	6.043	0.5666	Nova1
-0.6252	5.763	0.5666	Sorbs3
-0.8212	5.094	0.5666	Hgs
-0.8794	4.314	0.5666	4933434E20Rik
0.9684	4.027	0.5736	Pigv
0.7496	4.199	0.5736	Zadh2
-0.7095	5.251	0.5736	Dstyk
1.128	3.918	0.5736	Bcat2
0.826	4.654	0.5787	Mgat1
0.7824	6.041	0.5787	9530026P05Rik
0.6885	5.369	0.5795	Atl3
-0.5839	7.512	0.5809	Npc1
0.7143	5.136	0.5809	Pgrmc1
-0.9643	4.284	0.5827	Abhd5
-0.5582	8.427	0.5827	Ttyh3
-0.8572	4.43	0.5827	Mtx3
-0.8747	4.023	0.5868	Pigx
-0.6078	6.041	0.588	Septin8
0.6873	4.945	0.5932	Ncoa7
1.252	3.815	0.5932	Sh3gl2
-0.9201	4.35	0.5959	Col11a2
-0.7406	4.888	0.5959	Snrnp27
-0.4978	7.356	0.5959	Prrc2a
-0.5179	12.13	0.5959	Camk1d
0.7295	5.237	0.5994	Naa50
1.042	4.344	0.6066	4930544I03Rik
1.472	3.626	0.6119	Nubpl
0.9259	4.267	0.616	Zc3h6
-0.6287	7.083	0.616	Paqr7
-0.8519	5.158	0.616	Per1
0.7688	4.856	0.616	Tor3a
0.7231	4.455	0.616	Ap1ar
0.648	6.047	0.6185	Mllt3
0.6886	5.563	0.6208	Nmt2
-0.5682	7.395	0.6214	Pde4b
0.6772	4.88	0.6214	Tfcp2
1.103	4.653	0.6225	Msra
0.5499	6.728	0.6238	Dock7
0.7144	5.094	0.6265	Msl2
0.7052	5.808	0.6273	Atf6
-0.8057	4.296	0.6291	Ccnc
-0.6681	7.35	0.6291	Dbi
-1.823	4.133	0.6291	Slc24a2
1.264	3.545	0.6291	Rrp1b
0.9062	3.756	0.6291	Mnt
0.973	3.915	0.6291	Tmem35a
-0.8875	5.424	0.6291	Id3
-0.7443	4.943	0.6291	Psmc5
-0.543	6.574	0.6291	mt-Nd4
-0.4484	7.688	0.6291	Mtss2
-1.182	3.653	0.6291	Rbmxl1
0.8769	4.095	0.6291	4932438H23Rik
0.899	3.651	0.6328	Polr1f
0.8313	4.54	0.6328	Adora2b
-0.6525	5.455	0.6391	Cr1l
-1.014	4.024	0.6401	1700019D03Rik
0.8773	4.388	0.6401	Pola1
-0.6552	5.847	0.6423	Cyb5b
-0.7378	4.719	0.6423	Sem1
0.8933	4.35	0.6423	Slc9a7
-1.989	7.18	0.6423	Kcnk1
-1.01	3.851	0.6423	Spata6
0.9944	4.367	0.6423	Jpx
0.8303	4.267	0.6423	Rnaset2a
-0.9463	4.171	0.6423	Gm45708
0.842	4.383	0.6423	Ddx10
-0.6376	5.924	0.6492	Stip1
-0.7003	5.874	0.6492	Klf15
-0.5463	6.997	0.6492	Por
0.7088	5.487	0.6492	Cep128
0.8904	4.494	0.6534	Abhd17c
-0.5346	7.821	0.6581	Zhx3
-0.6357	5.152	0.659	Abcf1
-0.8372	5.852	0.6649	Apln
0.7494	5.082	0.6649	Commd10
0.7601	4.093	0.6649	Septin6
0.4985	8.27	0.6649	Cpeb4
0.537	6.288	0.6649	Ctso
0.5661	6.766	0.6649	Hs2st1
0.5402	6.044	0.6649	Adra1a
-0.6054	5.679	0.6649	U2af2
0.4629	6.967	0.6649	Ehbp1
-0.4747	7.032	0.6649	mt-Nd5
-0.8375	4.579	0.6649	Zfp703
-0.5937	5.56	0.6649	Snw1
0.6917	5.616	0.6649	Atp11c
0.7924	4.612	0.6649	Dok6
0.5462	6.107	0.6649	Zfp445
-0.748	4.843	0.6649	Fbrs
0.6153	6.659	0.6649	Fnip1
-0.5831	10.18	0.6649	Mir6236
0.6086	7.79	0.6649	Tox
0.8221	4.832	0.6649	Ralb
-1.718	6.925	0.6649	Tsc22d3
0.9838	4.773	0.6649	Syngr1
0.8187	3.918	0.6649	Zbtb25
0.5713	5.933	0.6649	Marchf7
0.78	5.244	0.6649	Ttc23
-0.8643	4.246	0.6649	Senp3
-0.7183	4.93	0.6649	Ndufa7
0.7665	4.704	0.6649	Mical1
-0.5377	6.002	0.6649	Sub1
0.5777	5.419	0.6649	Focad
-0.5137	7.506	0.6649	Cdh19
0.7473	8.043	0.6652	Itih3
0.4004	10.11	0.6672	Actb
0.7761	4.056	0.6682	Coq2
0.7209	4.557	0.6702	Cep192
0.7101	5.085	0.6702	Zmat1
0.8853	4.103	0.6702	Notch3
-1.534	3.635	0.6702	Gm9750
1.154	3.829	0.6702	Gm26691
0.6274	8.078	0.6702	Gnaq
-1.026	6.545	0.6702	Asic2
0.7088	5.511	0.6702	St7
0.6751	4.671	0.6702	Sae1
-0.5154	7.191	0.6702	Lgi1
1.197	5.148	0.6702	Wsb1
-0.544	5.955	0.6702	Pon2
-0.7802	4.145	0.6702	Letmd1
0.6972	4.651	0.6702	Zfp729a
1.175	4.131	0.6702	Cmas
1.057	5.412	0.6702	Shroom4
-0.7152	4.577	0.6709	Gdf10
-0.7669	4.799	0.6709	Ndufa3
-0.8692	4.825	0.6793	Zfp704
-0.577	5.251	0.6805	Prr12
-0.9528	4.05	0.6805	Fzd7
-0.817	4.151	0.6842	Spg21
-0.539	6.428	0.6863	Pura
0.9495	4.072	0.6874	Akt1s1
0.7975	4.069	0.6874	Zfp282
-0.6673	5.521	0.6894	Gm37885
-0.6842	5.319	0.6896	Arrdc3
0.5281	6.087	0.6934	Hrh1
0.7007	4.704	0.6934	Gpr158
0.7685	4.778	0.6934	Gm20646
0.7389	4.642	0.6934	Tmem109
0.6372	5.367	0.6958	Hbp1
0.7038	4.523	0.6958	Commd1
0.6267	5.017	0.6958	Igsf21
0.6146	5.97	0.6958	Sugct
-0.6238	4.795	0.6958	Lmtk2
-0.6023	5.198	0.6958	Rab6b
0.974	4.028	0.6958	Pcdh19
0.9075	3.852	0.6958	Elovl4
-0.9661	4.222	0.6958	Mrpl40
0.5456	8.954	0.6958	Ctsb
-0.5324	5.19	0.6958	Washc5
0.4704	7.164	0.6958	Scarb2
0.5359	6.911	0.6967	Cask
-0.6625	4.869	0.6967	Ak4
-0.6733	4.258	0.6967	Prmt9
0.5243	5.899	0.6967	Stim1
0.6174	4.687	0.6987	Siah1a
-0.6381	4.942	0.6989	Ndufb6
-1.733	5.275	0.6989	Zbtb16
0.6978	6.222	0.6989	Apbb2
0.7383	5.562	0.701	Acvr2a
-0.8019	3.776	0.701	Fahd2a
0.6182	5.252	0.701	D3Ertd751e
0.7104	4.397	0.7028	Mtcl1
-0.6292	6.634	0.7028	Capn2
-0.6408	5.153	0.7028	Slu7
-0.7279	4.635	0.7028	Caml
0.6738	6.494	0.7028	Folh1
0.4358	6.732	0.7028	Hnrnpl
-0.4789	6.096	0.7033	Tef
0.7724	3.884	0.7033	Slc2a13
-1.405	6.93	0.7128	Plp1
-0.618	4.624	0.7128	Sbf1
-0.5053	7.072	0.7128	Zfp36l2
-0.5654	5.529	0.7128	Herpud1
-0.5095	7.535	0.7128	Eif4g3
0.4648	7.12	0.7128	Nol4
-0.797	4.827	0.7128	Smu1
0.7512	3.873	0.7128	Ppp1cc
-0.6758	4.383	0.7128	Tab1
0.6884	4.717	0.7128	Epm2a
0.6509	5.585	0.7128	Kdm7a
-0.7697	4.545	0.7128	Nat8f3
1.031	3.878	0.7128	Gm12905
0.7002	4.805	0.7128	Cycs
0.6141	4.719	0.7128	Gsr
1.172	3.829	0.7134	Kcnj3
-0.5206	5.755	0.7134	Lman2
-0.5508	6.079	0.7134	Snrk
-0.7056	4.52	0.7134	Zfp110
-0.7771	4.657	0.7134	Cox17
-0.4884	7.189	0.7134	Mfn1
-0.5883	7.559	0.7134	Pde7b
1.294	3.669	0.7134	Dera
-0.459	6.019	0.7151	Rab11fip4
0.6432	5.001	0.7153	Fuca2
0.5818	5.762	0.7172	Gmds
0.7301	4.687	0.7172	Tmem168
-0.7701	4.237	0.7172	Ube2q1
0.6571	5.033	0.7172	Gstz1
0.7735	4.409	0.7172	Mfsd1
-0.6695	4.654	0.7172	Cherp
-0.4934	5.398	0.7172	Sugt1
-0.8355	4.372	0.7172	Ssh1
-0.6053	6.064	0.7172	Tle5
0.4816	6.376	0.7172	Susd6
0.6257	5.285	0.7172	A630089N07Rik
0.5876	5.984	0.7172	Papss2
-0.5773	4.938	0.7172	Fkbp8
0.6891	4.524	0.7172	Fam184b
-0.6236	5.598	0.7172	Pcdhgc5
0.4829	7.5	0.7172	Tmtc2
0.4303	7.474	0.7172	Slc15a2
-0.6654	4.578	0.7172	Fbxo42
0.543	6.367	0.7172	Larp4b
0.5842	4.656	0.7172	Ypel5
-0.5723	5.574	0.7172	Dbt
-0.6009	4.658	0.7172	Gm21954
-0.4148	17.75	0.7172	Rn18s-rs5
0.6087	4.332	0.7172	Dnajc15
0.6165	4.987	0.7172	Nphp3
-0.5107	7.54	0.7172	Crot
0.8019	4.082	0.7172	Rhog
-0.8311	5.096	0.7172	Wbp11
-0.8829	4.5	0.7172	Rbp1
-0.7794	4.377	0.7172	H2bc6
0.8787	3.593	0.7172	Gstcd
0.5638	4.975	0.7172	Ap3s1
0.8374	4.494	0.7172	Spopl
0.8987	3.931	0.7172	Mynn
-0.73	4.212	0.7172	Lrrc49
0.8201	4.346	0.7172	Gdf11
0.7314	4.232	0.7172	Stxbp1
0.7918	3.878	0.7172	Adrb1
-0.7041	6.211	0.7172	Sqle
-0.743	4.431	0.7172	Bcas2
-0.7812	4.767	0.7172	Tspyl4
0.7297	4.462	0.7172	Prkci
-0.7646	4.141	0.7172	Arpc3
0.547	6.467	0.7172	Myo9a
0.6727	6.141	0.7172	Suclg2
-0.6048	4.856	0.7172	Pqbp1
-0.539	6.226	0.7172	Paip2
-0.6448	5.381	0.7172	Hes1
0.6389	4.66	0.7172	Alkbh8
0.4741	5.72	0.7172	A230057D06Rik
0.6416	5.932	0.7172	Hgf
0.582	4.925	0.7172	Ndufa9
-0.6109	4.259	0.7172	Dis3l
-0.7074	4.916	0.7172	Mrpl42
0.9252	3.684	0.7172	Me2
-0.683	4.212	0.7172	Atpif1
0.7331	4.537	0.7172	Fbxo34
-0.7815	4.439	0.7172	Tmem254
0.5181	6.186	0.7172	Rbm33
-0.5928	4.764	0.7172	Tmco3
-0.5394	5.978	0.7172	Nxn
-0.5298	5.542	0.7172	Setx
0.6336	7.543	0.7172	Ext1
0.7848	4.095	0.7172	Eml5
-0.8347	3.919	0.7172	Actl6a
0.6846	6.266	0.7172	Grb2
-0.5285	5.233	0.7172	Afap1
0.5809	4.97	0.7172	Cul4a
-0.8797	3.633	0.7172	Mvk
-0.3998	7.426	0.7172	Nfix
-1.016	4.597	0.7172	Cd151
0.5161	5.617	0.7172	Adgrl2
-0.6693	4.692	0.7172	Wdr61
0.8635	3.613	0.7172	Mtfr1
-0.5236	5.724	0.7172	Psmc2
1.244	3.6	0.7172	Pms1
-0.7299	4.115	0.7172	Aasdhppt
0.9275	4.495	0.7172	Slc35f1
-0.9253	3.717	0.7172	Tmem126b
-0.5657	5.352	0.7172	Cdc5l
0.8752	3.922	0.7172	Tbc1d2b
-0.5393	6.455	0.7172	Il33
-0.9103	3.85	0.7176	Bub3
0.5964	4.747	0.7176	Zfp942
-0.5052	6.405	0.7176	Kbtbd11
0.5397	6.729	0.7176	Slc6a9
0.8428	4.552	0.7176	Map3k14
-0.6336	4.575	0.7176	D630003M21Rik
0.6247	5.937	0.7176	Septin11
-0.5289	6.375	0.7176	Zfp207
-0.5983	5.255	0.7176	Zfp664
0.8182	4.039	0.7176	Pcdhgb6
0.605	4.476	0.7179	Sugp1
-0.7629	7.212	0.7189	Chst2
-0.7673	4.416	0.7189	Ubl5
-0.5561	6.966	0.7189	Pnpla7
0.5791	5.476	0.7189	Csf1
0.6098	4.971	0.7189	Rnf139
0.4348	9.747	0.7189	Adgrb3
-0.5139	8.7	0.7189	Mt3
-0.7645	4.81	0.7189	Pcna
0.7107	4.36	0.7189	Rnf41
0.5809	5.567	0.7189	Memo1
0.5651	5.632	0.7189	Cabin1
-0.7629	4.282	0.7189	Mgat2
-0.3992	6.918	0.7189	Sfpq
-0.5175	6.198	0.7189	Serpinh1
0.7868	3.822	0.7189	Nosip
-0.4591	7.781	0.7189	Epas1
0.9366	3.948	0.7189	Plch1
-0.9442	3.85	0.7189	Carhsp1
0.7984	5.242	0.7189	Gls
-0.6599	5.401	0.7189	Kif1c
-0.3974	7.878	0.7189	Igsf11
-0.5862	4.818	0.7189	Idi1
-0.8732	4.049	0.7189	Pom121
0.5137	5.507	0.7189	Slc49a4
0.8435	4.039	0.7189	Mios
-0.7027	4.309	0.7189	Jakmip2
-0.7811	4.259	0.7189	Poc1b
-0.7987	3.981	0.7189	Zscan21
0.6854	4.294	0.7191	Cep295
-0.657	4.814	0.7191	Gm4876
0.6993	4.036	0.7191	Ptprn2
-0.8206	3.991	0.7274	Eif3k
-0.4137	6.646	0.7274	Coro2b
0.7394	4.795	0.7274	Socs5
-0.9878	3.936	0.7274	Elavl3
0.7334	4.295	0.7274	Gm5820
0.4501	5.3	0.7274	Cops4
0.5139	5.628	0.7274	Dclk2
-0.5623	5.269	0.7274	Brk1
-0.7054	4.435	0.7274	Hdac1
-0.6551	4.084	0.7274	Fam174a
0.6037	5.101	0.7274	Pcdhga12
-0.6265	6.053	0.7274	Fabp5
0.604	6.359	0.7274	Fgf12
0.6959	4.43	0.7274	Trp53
-0.5384	4.777	0.7274	Kremen1
0.7214	4.099	0.7274	Bmerb1
0.4805	6.261	0.7274	Eya1
0.4195	6.237	0.7274	Kmt5b
0.4156	9.937	0.7274	Nlgn1
-0.77	6.108	0.7274	Galnt18
-0.7168	4.753	0.7274	Zfhx2
-0.6098	8.592	0.7274	Gjb6
-0.7389	4.685	0.7274	Pyurf
0.6878	4.084	0.7274	Tpm1
0.6271	5.056	0.7274	Elp1
-0.4733	8.124	0.7274	Calr
0.8404	3.982	0.7274	Dcaf17
-0.618	4.5	0.7274	Ccdc59
1.087	3.78	0.7274	Atosb
-0.4957	6.805	0.7274	Frmpd1
-0.4697	6.185	0.7274	Hmbox1
0.9046	4.791	0.7274	Ugt1a6a
0.534	5.404	0.7274	Syne2
0.5999	5.829	0.7274	Grin2b
0.9479	3.733	0.7274	6030458C11Rik
0.598	7.005	0.7274	Oxr1
-0.583	4.374	0.7274	Lztr1
-0.6767	4.655	0.7274	H2az2
0.6334	4.546	0.7274	Tpmt
-0.6097	5.846	0.7274	H2bc4
-1.371	14.31	0.7274	Cdk8
0.5602	4.871	0.7274	Eif3m
-0.446	7.038	0.7274	Trp53bp2
-0.5416	6.174	0.7274	Arhgap31
0.5674	5.466	0.7274	Plekha7
0.441	5.728	0.7274	Cpne3
-0.4211	6.186	0.7274	Sgms1
-0.4963	7.852	0.7274	Cntfr
-0.5557	7.892	0.7274	Klf9
-0.4328	6.658	0.7274	Rapgef3
0.6129	4.525	0.7274	Gnpat
0.5316	5.717	0.7274	Ralgds
0.9149	3.632	0.7274	Wdsub1
-0.6504	4.481	0.7274	Nop56
0.7738	5.951	0.7274	Ppp1r21
-0.5207	5.104	0.7274	Nacc1
0.5505	4.952	0.7274	Golga5
-0.5478	4.864	0.7274	Per2
0.5204	5.241	0.7274	Gclc
0.7991	4.369	0.7274	Rnf121
0.7671	3.586	0.7274	Gm20604
-0.5713	5.151	0.7274	Strap
-0.5428	5.945	0.7274	Atp6v0e
-0.4808	6.247	0.7274	Snx3
0.5077	5.153	0.7274	Zfp606
0.6736	4.128	0.7274	Ddx55
-0.5719	4.699	0.7274	Dennd10
0.5124	6.117	0.7274	Fndc3a
0.6961	4.541	0.7274	Taf1b
-0.782	5.018	0.7274	Inf2
-0.6973	4.785	0.7274	Rnf220
-0.4569	6.071	0.7274	9430041J12Rik
-0.7219	4.527	0.7274	A930015D03Rik
0.5058	5.239	0.7274	Rnf11
-0.3763	7.308	0.7274	Hlf
0.78	3.647	0.7274	Gcfc2
0.686	4.872	0.7274	Scai
-0.4276	6.797	0.7274	Hip1
-0.738	4.645	0.7274	Fam13a
0.521	5.028	0.7274	Rbmx
0.8407	5.314	0.7274	Csmd1
-0.7251	5.804	0.7274	Pitpnm2
0.461	5.602	0.7274	Cdc14a
-0.6131	4.698	0.7274	Pfdn1
0.8335	3.599	0.7274	Ncs1
-0.4937	5.485	0.7274	Rpl41
0.7115	3.737	0.7274	Ammecr1
-0.9934	3.884	0.7274	Cldn12
0.4962	6.061	0.7274	Reps1
0.683	4.624	0.7274	Ift80
-0.6305	4.295	0.7274	Polr3a
-0.5557	6.579	0.7274	2210408F21Rik
-0.4582	15.12	0.7274	Cmss1
0.3889	8.267	0.7274	Il1rapl1
-0.8599	5.021	0.7274	Scoc
-0.5447	4.598	0.7274	Coq10b
-0.4762	4.917	0.7274	Ssu72
-0.7463	3.924	0.7274	Fmo5
-0.4344	5.558	0.7274	Wipf2
0.349	8.042	0.7274	Cyfip1
-0.4603	6.493	0.7274	Acly
-0.5687	4.358	0.7274	Sestd1
0.52	5.347	0.7274	Cdk17
-0.462	6.631	0.7274	Zfp106
1.001	3.705	0.7274	Ttll4
0.4687	6.199	0.7274	Trim44
-0.4708	8.216	0.7274	Ncan
-0.7049	4.09	0.7274	Cc2d1a
0.6293	4.577	0.7274	Pfkfb2
0.4134	7.104	0.7274	Lypd6
-0.4905	10.54	0.7274	Acsl3
0.471	6.156	0.7274	Cecr2
-0.6145	5.211	0.7274	Rpa1
-0.6374	5.199	0.7274	Pgp
-0.5314	5.326	0.7274	Mapre3
-0.6752	4.533	0.7274	Isoc2a
0.5387	4.441	0.7274	Slc30a4
0.6471	4.91	0.7274	Nsd2
-0.3814	8.273	0.7274	Map2
0.7817	4.361	0.7274	Sfrp5
-0.7119	6.025	0.7274	Tob1
-0.964	3.587	0.7274	Gadd45gip1
0.4642	5.521	0.7274	Smad4
0.7118	4.511	0.7274	Cog8
-0.4539	5.887	0.7274	Ndufa12
-0.6021	5.661	0.7274	Mrtfb
-0.6115	4.152	0.7274	Nol8
-0.5117	4.887	0.7274	Setdb1
-0.5192	4.934	0.7274	Stk25
-0.6446	4.424	0.7274	Hjurp
0.5321	5.699	0.7274	Sh3rf1
-0.5277	4.591	0.7274	Clk2
0.8787	4.382	0.7274	Pcdhgb7
0.4411	5.506	0.7274	Cpne1
-0.7098	4.076	0.7274	Hr
-0.5793	5.108	0.7274	Psmb2
0.6667	4.404	0.7274	Gm49164
0.4607	7.454	0.7274	Fam172a
0.3928	8.347	0.7274	Kcnd2
0.458	7.075	0.7274	Lims1
-0.5612	4.373	0.7274	Atp13a1
-0.5391	5.493	0.7274	Trim37
0.4413	5.751	0.7274	Swap70
-0.3827	6.658	0.7274	Purb
-0.46	5.889	0.7274	Etv1
-0.6022	4.501	0.7274	Stub1
-0.4576	7.028	0.7274	Zfp36l1
0.6493	3.927	0.7274	Wdr12
-0.4558	5.363	0.7274	Rpl18a
0.5928	4.305	0.7274	Ankmy2
0.6603	4.06	0.7274	Sdk2
0.5976	5.212	0.7274	Sema6a
-0.4772	7.997	0.7274	Id2
-0.6955	3.81	0.7274	Rbm4b
-0.5106	6.508	0.7274	Pcbp1
0.3358	8.742	0.7274	Abca1
0.5637	5.677	0.7274	Rnf24
0.4906	5.818	0.7274	Aig1
-0.558	4.886	0.7274	Sec24c
-0.784	3.982	0.7274	Zcchc17
0.4979	6.007	0.7274	Sema4a
0.4542	5.619	0.7274	Nrxn3
-0.3552	6.722	0.7274	Ahcyl2
0.4477	8.503	0.7274	Klf12
-0.5204	6.127	0.7274	Megf9
0.5536	5.386	0.7274	Nfe2l1
0.449	7.851	0.7274	Gm6145
0.5298	5.122	0.7274	Aifm1
-0.5341	6.099	0.7274	Mxd4
-0.5331	4.733	0.7274	Mettl16
-0.6169	4.133	0.7274	Nup35
0.6157	4.938	0.7274	Pts
-0.5642	4.95	0.7274	Rimklb
-0.3685	7.05	0.7274	Ptma
0.8091	3.812	0.7274	Ugcg
0.5145	6.045	0.7274	AW554918
0.4437	8.627	0.7274	Fut9
-0.5556	4.537	0.7274	Foxj2
0.4326	5.906	0.7274	Gm20713
-0.398	6.44	0.7274	Adgrb1
0.4765	5.1	0.7274	Kdelr2
0.5112	4.75	0.7274	Mzt1
-0.8785	3.606	0.7274	Mdfic
-0.4512	5.87	0.7274	Ap1b1
-0.4777	4.992	0.7274	Rbm22
-0.5195	5.413	0.7274	Olfml1
0.4023	6.205	0.7274	D130040H23Rik
0.66	3.989	0.7277	Tafa1
0.7153	4.252	0.7295	Orc2
0.5277	4.469	0.7302	Slc17a5
-0.5147	5.385	0.7302	Rpl31
0.5557	5.08	0.7304	Acat3
0.5586	4.793	0.7307	Gopc
-0.4641	7.011	0.7307	Nim1k
-0.5975	4.954	0.7307	Vps39
-0.7042	4.195	0.7307	Prdx4
-0.5331	7.955	0.7307	Id4
-0.7901	4.178	0.7307	Hdac3
-0.7744	4.354	0.7307	Tbrg1
1.067	3.585	0.7307	Dhx33
-0.5068	5.196	0.7307	Trappc11
0.386	6.91	0.7312	Kcnip3
0.8178	4.229	0.7312	Slc9a1
0.6224	4.432	0.7312	Bmi1
-0.5545	4.36	0.7312	Col4a2
-0.4196	6.112	0.7322	Btaf1
0.4931	6.43	0.7322	Itgb1
-0.4469	5.189	0.7322	Slc35d1
0.6573	4.118	0.7322	Erf
0.7834	5.46	0.7322	Epha5
-0.8004	4.269	0.7322	Ftx
0.6606	4.106	0.7322	Prxl2c
-0.6403	4.1	0.7322	Zfp780b
0.5147	6.018	0.7322	Rap1a
-0.3991	6.399	0.7322	Mib1
0.3979	6.127	0.7322	Wdr1
0.4171	6.503	0.7322	Slc22a23
-0.7719	4.105	0.7322	Arf5
-0.6423	3.943	0.7322	Rdh14
-0.478	4.834	0.7322	Sympk
-0.4825	6.585	0.7322	Clip3
-0.5198	6.127	0.7322	Itih5
0.3401	7.799	0.7326	Nptn
0.3955	7.564	0.7326	Itga6
-0.4245	5.956	0.7326	4833439L19Rik
0.6133	4.627	0.7326	Iftap
-0.4175	6.345	0.7326	Dennd4c
0.7363	3.896	0.7326	Ier5
-0.5028	5.923	0.7326	Apc2
0.589	4.192	0.7326	Naa12
0.4149	7.143	0.7326	Usp34
-0.4828	5.304	0.7347	Psmd12
-0.6407	4.46	0.7347	Dnttip2
0.6427	4.116	0.7347	Nupl1
-0.5104	4.633	0.7347	Arid5a
0.7915	5.404	0.7347	Znrf1
0.524	7.928	0.7347	Mfap3l
-0.4635	7.799	0.7347	Mid1ip1
-0.4144	6.638	0.7347	Cds2
-0.5883	4.241	0.7347	Scnm1
-0.871	4.248	0.7347	Fos
-0.5222	4.775	0.7347	Dhx8
-0.5155	6.467	0.7347	Ndufc2
-0.5939	3.924	0.7347	Ube2m
-0.577	5.72	0.7347	Atp5g3
-0.6146	3.839	0.7347	Atl1
-0.5969	4.503	0.7347	Chd3
-0.5497	5.054	0.7347	Gm13872
0.6958	4.203	0.7347	Lrrc28
-0.6477	3.81	0.7347	Rbm3
-0.4895	4.824	0.7347	Eif2a
0.4758	5.895	0.7347	Tmx4
0.3473	6.356	0.7347	Zfand5
-0.5299	5.483	0.7347	Yipf5
0.7436	3.873	0.7347	Sec24d
0.6452	4.965	0.7347	Slc13a3
-0.783	7.088	0.7347	Agmo
0.5699	4.424	0.7347	Cnst
0.5137	5.394	0.7347	Mast2
0.6662	4.081	0.7347	Cibar1
-0.4643	6.231	0.7347	Tra2a
0.5553	4.757	0.7355	Ppp2r5d
0.5095	5.827	0.7363	Dhx9
-1.716	3.212	0.7381	Rnf150
0.603	4.392	0.7381	Cog2
0.4093	6.751	0.7381	Aldh1a1
0.7338	4.063	0.7381	Slc25a25
-0.3848	6.479	0.7381	Arl8a
0.8409	4.048	0.7381	Ncald
-0.7002	4.446	0.7381	Rnps1
-0.6765	4.621	0.7381	Nudt19
-0.4121	6.893	0.7395	Dbx2
-0.833	4.861	0.7395	Srsf6
0.6178	4.317	0.7395	Eed
0.7016	4.671	0.7395	Micu2
0.4919	5.731	0.7412	Ctnnb1
-0.5568	4.79	0.7433	Flt1
0.5727	6.062	0.7437	Rdh11
-0.4544	5.266	0.7437	Invs
-0.6755	4.342	0.7437	Slc7a5
0.6553	5.324	0.7437	Glo1
-0.5469	4.92	0.7437	Pnpla2
0.4005	6.045	0.7437	Foxn2
-1.233	3.549	0.7455	Atp5l
0.3747	6.77	0.747	Atp2b1
-0.372	7.692	0.7502	Sesn3
0.5449	5.29	0.7502	Lrpprc
0.7806	3.888	0.7502	Mrpl50
0.7216	3.827	0.7502	Col16a1
0.576	5.471	0.7502	Bicral
-0.406	8.054	0.7502	Ddah1
-0.56	4.525	0.7502	Rps12
-0.4683	4.818	0.7502	Poldip3
0.5947	5.201	0.7502	Grip1
0.6554	4.438	0.7502	Ppp1r11
-0.465	5.426	0.7502	Ppp5c
0.3756	7.64	0.7502	Zfpm2
-0.3718	6.063	0.7502	Nup98
0.7047	4.083	0.7502	Nat8f6
-0.5364	4.596	0.7502	Ift81
0.5386	4.949	0.7502	Atm
0.5003	5.973	0.7502	Fggy
-0.7276	4.273	0.7502	Smoc1
-0.6396	4.78	0.7502	Zfp37
0.3963	5.462	0.7502	Pld2
0.5141	5.088	0.7502	Yeats2
1.292	4.993	0.7502	Cacna1a
-0.6238	4.905	0.7502	Ndufb5
0.7324	4.077	0.7502	Ppp2cb
0.5392	4.598	0.7502	Slc39a1
-0.7267	6.499	0.7502	Lrrc8c
0.3943	7.007	0.7502	Dip2c
-0.5823	5.492	0.7502	Ccnd2
-0.6768	4.596	0.7502	Gid8
-0.7022	4.168	0.7502	Mvd
-0.5673	4.682	0.7502	Slc5a3
0.5285	4.869	0.7502	Cbr3
-0.6731	4.005	0.7502	Pgm3
-0.5821	7.299	0.7502	Omg
0.4817	4.676	0.7502	Zfp869
0.3466	6.74	0.7502	Osbpl1a
-0.8224	4.004	0.7502	Ttc33
-0.6501	5.22	0.7502	Dbndd2
-0.5283	4.81	0.7502	Ing3
-0.5785	5.47	0.7502	Kctd1
-0.6454	5.678	0.7502	H2-K1
0.4489	5.742	0.7502	Ostm1
0.4519	5.658	0.7502	Cwf19l2
0.6474	4.566	0.7502	Rab40c
0.5875	6.077	0.7502	Snx14
-0.401	6.398	0.7514	Ttr
0.6677	3.84	0.7514	Slc27a4
-0.6826	4.261	0.7514	Ddit4l
-0.4146	5.738	0.7514	Vta1
0.5082	5.833	0.7514	Cwc27
-0.4455	4.796	0.7514	Spock2
0.6348	5.221	0.7514	Pax6
-0.4906	5.155	0.7514	Mtmr1
0.5147	6.13	0.7514	Naaladl2
-0.4488	5.568	0.7514	Hdgf
-0.4333	6.765	0.7514	Caskin1
-0.3607	6.922	0.7514	St13
0.6441	5.087	0.7514	Atp11b
0.7341	6.698	0.7514	Unc5c
-0.6241	5.248	0.7514	Dpyd
-0.4781	5.383	0.7514	Rbm27
0.3699	7.923	0.7514	Nr3c2
0.714	4.252	0.7532	L2hgdh
0.5515	5.132	0.7532	Serp1
-0.5652	4.969	0.7532	Cavin3
0.4992	5.479	0.7532	Tial1
0.7589	3.833	0.7532	Slc2a12
0.5249	4.871	0.7532	Stim2
0.6326	6.717	0.7532	Arl15
-0.5343	4.544	0.7547	Pebp1
-0.7016	5.939	0.7547	Gfap
-0.3733	6.347	0.7554	Ylpm1
-0.8236	4.068	0.7554	Pacsin3
-0.6535	5.049	0.7554	Ddit4
-0.6772	3.94	0.7559	Uqcc2
-0.7501	4.153	0.7576	Kif5c
0.5642	5.159	0.7576	Spast
0.4956	4.549	0.7576	Steep1
0.4473	6.083	0.7576	Trpm7
0.6865	4.133	0.7576	Rmnd1
-0.3815	10.84	0.7576	Cpe
0.7383	3.818	0.7576	Haghl
-0.3582	8.572	0.7582	Nhsl1
-0.5947	4.523	0.7582	Apbb1
0.7733	5.032	0.7582	Jag1
-0.4106	8.003	0.7582	Kcnn2
0.4602	5.614	0.7582	Hnrnpdl
-0.5471	4.856	0.7582	Zfp398
-0.5482	4.559	0.7582	Necap1
0.4623	5.232	0.7582	Parg
0.5705	4.06	0.7582	Zfp346
-0.5591	4.201	0.7582	Mxd1
0.5734	4.2	0.7582	Smarce1
-0.3643	6.224	0.7582	Acbd5
0.6843	4.229	0.7582	Zrsr1
0.6267	4.299	0.7582	Trappc6b
-0.4297	5.414	0.7582	Arhgap23
-0.6329	4.828	0.7582	Atp5mpl
0.3888	5.646	0.7582	Usp33
-0.699	4.435	0.7582	C1qbp
0.4983	5.906	0.7582	Brwd1
-0.3672	5.862	0.7582	Ythdc1
0.4652	5.002	0.7582	Thsd7a
-0.3481	7.457	0.7582	Arhgef4
0.3292	7.404	0.7582	Bcl2
0.5474	4.275	0.7582	Edem2
-0.697	3.898	0.7582	Lrrn3
-0.4868	6.874	0.7586	Lhx2
0.5139	5.63	0.76	Rnf111
-0.5284	5.593	0.76	Cisd1
-0.5311	5.014	0.76	Dad1
-0.5361	6.568	0.7606	Lmo4
0.5852	5.94	0.7663	B3galt2
-0.5936	4.083	0.7663	Arpc5l
-0.6197	5.179	0.7663	Mical3
-0.5855	4.463	0.7668	Noc3l
0.339	7.377	0.7693	Rtn4
-0.459	5.344	0.7693	Impa1
0.4249	5.543	0.7693	Dlat
-0.5457	4.781	0.7693	Lss
-0.5895	4.319	0.7693	Ankra2
-0.5592	4.31	0.7694	Ankrd27
-0.445	5.281	0.7697	Cgrrf1
0.3587	6.088	0.7703	Atp6ap2
-0.5226	4.695	0.7703	Prcc
-0.5105	4.349	0.7703	Cry1
0.3744	8.664	0.7703	Gm3764
-0.7401	3.936	0.7703	Kcnd3
0.4718	5.192	0.7707	Tsg101
-0.5939	4.599	0.7721	Hsd17b7
0.5114	4.702	0.7721	Herc3
0.3727	6.254	0.7721	Srsf5
0.6534	4.764	0.7721	Gm26843
0.3903	9.564	0.7721	Kirrel3
0.4968	5.619	0.7725	Galnt7
0.4949	4.911	0.7725	Tmpo
0.6029	3.95	0.7725	Gm26862
0.7101	6.69	0.7728	Immp2l
-0.441	4.906	0.7728	Cep162
-0.4226	6.603	0.7728	Bhlhe40
-0.514	5.069	0.7728	Alpl
0.5836	3.961	0.7728	Ddx19a
-0.5337	5.188	0.7728	Hexim1
0.571	4.205	0.7728	Rdh10
-0.5551	4.608	0.7728	Zbtb7c
-0.6208	4.835	0.7728	Pcdhb14
-0.3661	6.369	0.7728	Bod1l
0.6926	3.736	0.7728	Mrpl32
-0.6661	4.894	0.7728	Cend1
-0.5639	5.774	0.7728	Cox7c
-0.5811	3.909	0.7728	Emg1
0.5286	4.869	0.7728	Zswim8
-1.264	4.501	0.7728	Kif5a
0.5047	4.964	0.7728	Tecpr1
-0.4011	5.551	0.7745	Amd1
-0.5394	5.459	0.7756	Exoc3
-0.5356	4.762	0.7761	Mex3c
0.4085	5.781	0.7767	D5Ertd579e
-0.4724	4.962	0.7767	Acbd6
-0.3779	7.64	0.7768	Sorbs1
0.5023	5.041	0.7769	Dtd1
0.5671	4.399	0.7769	Hunk
-1.035	4.286	0.7769	Gm45837
-0.5199	4.394	0.7769	Rint1
-0.4219	6.854	0.7769	mt-Nd1
0.3188	7.439	0.7789	Atp6v0a1
0.5098	4.854	0.7789	Lnpk
-0.637	3.924	0.7789	Rpf2
0.6252	4.755	0.7789	Plpbp
-0.3782	7.763	0.7792	Phka1
-0.6348	3.913	0.7807	ENSMUSG00000121141
-0.4769	7.741	0.7807	Mt2
0.5953	5.292	0.7807	Btrc
0.9503	3.686	0.7817	AI480526
0.3749	8.437	0.7827	Sema6d
0.7055	4.19	0.7847	Rpgr
0.5074	4.735	0.7847	Aebp2
-0.4659	5.115	0.7847	Gask1a
-0.3657	5.705	0.7847	Gpr107
0.3827	5.856	0.7848	Arntl
0.7686	4.236	0.7852	Hhipl1
-0.6145	3.949	0.7877	Pbdc1
0.6234	3.826	0.7877	Runx1t1
0.4669	5.315	0.7877	Arhgap18
-0.5341	6.242	0.7881	Nr2e1
0.4688	6.456	0.7881	Klhdc7a
0.4492	5.323	0.789	Rnf14
-0.6332	5.154	0.789	Fh1
0.5559	5.284	0.7891	Atp7a
0.4625	6.275	0.7891	Vgll4
0.3783	6.073	0.7893	Comt
0.4662	5.106	0.7893	Afdn
-0.3237	6.323	0.7893	Bcr
-0.7835	4.63	0.7893	Slx4ip
-0.4493	5.325	0.7893	Med25
-0.3695	5.899	0.7893	Esyt2
0.3944	6.152	0.7893	Zfp871
-0.4666	4.859	0.7902	Camta2
0.4967	5.139	0.7902	Ss18
-0.3867	6.108	0.7902	Zbtb38
0.6117	3.878	0.7902	Lcmt1
0.3318	6.45	0.7902	Tom1l1
-0.5858	3.857	0.7902	Adcy3
-0.669	4.069	0.7902	Mrpl9
0.3702	6.381	0.7902	Sec63
-0.8092	3.933	0.7902	Agbl4
-0.5765	4.796	0.7908	Txndc11
0.4256	5.267	0.7927	Bmt2
0.396	6.064	0.7927	Tafa5
0.4077	5.504	0.7938	Tgs1
0.4788	4.936	0.7938	Hdac2
-0.418	6.149	0.7938	Mink1
0.6518	4.389	0.7938	Tmem64
-0.7301	3.812	0.7939	Spag7
0.5804	5.126	0.7956	Fkbp9
-0.6738	3.588	0.7962	Nelfcd
0.4141	5.912	0.7962	Cdh4
0.5155	4.238	0.7962	Icosl
-0.8424	4.586	0.7984	Fdps
-0.3298	7.122	0.7984	Nisch
0.4372	6.631	0.7984	Srpk2
0.5336	5.086	0.7994	Eapp
-0.5854	4.738	0.7994	Nedd8
-0.4111	5.51	0.7999	Sp1
0.6211	4.033	0.7999	Spata7
-0.7035	4.427	0.7999	Derl2
-0.4057	5.309	0.7999	Gca
-0.3387	6.051	0.7999	Ik
0.4122	5.508	0.7999	Tcp11l1
-0.4475	5.753	0.7999	Amotl1
-0.5458	6.013	0.7999	Sox8
-0.5077	4.061	0.7999	Sap30l
0.4679	4.634	0.7999	Rragb
0.4688	5.208	0.7999	Chic2
-0.5477	4.522	0.7999	Limd1
0.6202	4.325	0.7999	F730043M19Rik
-0.5346	5	0.7999	Kantr
-0.3597	6.402	0.7999	Tet2
-0.6111	4.109	0.7999	Fam124a
-0.3541	5.957	0.7999	Naca
0.3665	5.397	0.7999	Uba3
-0.3622	5.781	0.7999	Cox10
0.6581	4.963	0.7999	Tmem184c
-0.4772	5.145	0.7999	Rab33b
0.4277	5.965	0.7999	Pip4p2
-0.5078	4.553	0.7999	Rpl36
0.4686	6.018	0.7999	Rsu1
-0.4521	7.802	0.7999	Car2
-0.376	10.19	0.7999	Il31ra
-0.5959	4.182	0.7999	Jtb
0.6019	4.694	0.7999	Fam193b
-0.661	4.072	0.7999	Wdr35
0.5975	4.443	0.7999	Fam32a
0.3753	6.058	0.7999	Fam120c
-0.2907	8.756	0.7999	Srrm2
-0.5288	4.76	0.7999	Hspe1
-0.5917	3.87	0.7999	Rnf25
-0.3829	5.723	0.7999	Ppp3r1
0.617	4.241	0.7999	Sardh
-0.3779	5.103	0.7999	Sec23a
-0.6104	4.473	0.7999	Dusp1
-0.4362	5.447	0.7999	Pacs2
-0.4623	4.815	0.7999	Dcaf7
-0.5621	3.871	0.7999	Grtp1
-0.4472	5.492	0.7999	Slc43a2
0.3973	7.027	0.7999	Usp24
0.4233	5.087	0.7999	Lrrk2
0.3805	6.212	0.7999	Pcx
-0.3543	5.904	0.7999	Far1
-0.4454	5.648	0.7999	Txndc5
-0.331	5.983	0.7999	Ctdspl
0.8159	3.878	0.7999	Slc25a53
-0.7876	4.527	0.7999	Plin3
0.327	6.01	0.7999	Rprd2
0.5797	4.916	0.7999	Park7
0.471	5.57	0.7999	Zfp827
-0.527	4.541	0.7999	Sri
0.6409	4.72	0.7999	Oma1
0.4303	4.868	0.7999	Med23
0.633	4.155	0.7999	Gtf2h1
-0.5925	4.019	0.7999	Zdhhc9
-0.3898	7.422	0.7999	Wnk2
-0.4422	5.384	0.7999	Dek
-0.5257	4.493	0.7999	Ppm1g
-0.5307	4.294	0.7999	Ltbp3
0.5223	4.912	0.7999	Kansl3
0.4897	4.745	0.7999	Serpinb6a
-0.4757	6.542	0.7999	Fez1
-0.4565	5.368	0.7999	Brd7
0.4884	4.906	0.7999	Akt1
-0.433	4.832	0.7999	Ccng1
-0.4575	8.437	0.7999	Gapdh
0.5076	4.133	0.7999	Uvssa
-0.3927	5.392	0.7999	Inppl1
-0.5825	4.34	0.7999	Pfdn5
0.4011	7.378	0.7999	Lrig1
-0.6156	4.21	0.7999	Sys1
-0.4516	4.633	0.7999	Pcnp
0.6517	5.871	0.7999	Supt3
-0.3454	6.515	0.7999	Sf3b2
0.4686	4.983	0.7999	Odf2
0.4324	4.544	0.7999	Mphosph9
0.3728	9.8	0.7999	Mir99ahg
0.5073	5.125	0.7999	Exoc6
0.707	4.185	0.7999	Gal3st4
-0.7069	3.9	0.7999	Agtrap
0.3495	6.879	0.7999	Strbp
-0.5437	3.976	0.7999	Pdzd2
-0.6055	4.038	0.7999	Washc1
0.4564	5.081	0.7999	Mtm1
0.557	6.885	0.7999	Phf14
0.3728	6.469	0.7999	Ctif
-0.3551	7.406	0.7999	Dync1h1
0.4805	6.285	0.8002	Zfp407
0.3152	7.085	0.8002	Tnks2
-0.5472	4.035	0.8002	1500004A13Rik
-0.4712	4.711	0.8002	Gm16168
0.4805	4.51	0.8002	Ttbk2
-0.5416	3.878	0.8002	4930453N24Rik
-0.4528	8.161	0.8002	Fam171b
-0.4997	6.967	0.8002	Tubb2a
0.5575	3.857	0.8011	Prpf38a
0.4173	4.627	0.8012	Zbtb11
0.5428	4.745	0.8012	Gm32618
0.4497	5.385	0.8012	Dram2
-0.408	5.591	0.8012	Samd4b
0.3349	7.797	0.8012	Soat1
0.9957	3.456	0.8012	Nkx6-2
-0.3837	7.837	0.8012	Pcdhgc4
-0.4923	4.459	0.8012	Gas5
0.689	5.827	0.8012	Rps6ka3
0.4251	5.145	0.8012	Zranb1
-0.5164	4.07	0.8012	Gpat4
0.5313	4.053	0.8012	Gemin5
0.3044	8.067	0.8012	Xpr1
0.4532	4.625	0.8014	Rcor3
-0.5984	4.118	0.8017	Nkiras1
0.3314	6.933	0.8017	Klf7
-0.4479	7.692	0.802	Dkk3
0.4613	4.77	0.802	Spaca6
0.4819	4.654	0.802	Ptdss2
0.3444	10.38	0.8023	Npas3
0.7289	4.373	0.8023	Ust
0.8285	4.296	0.8023	Litaf
0.462	5.074	0.8023	Mpdu1
-0.5109	4.597	0.8023	Rrn3
0.395	5.591	0.8023	Bcl9l
0.377	5.191	0.8023	Dip2a
-0.3768	5.313	0.8023	Abcc4
0.4478	4.773	0.8023	Kdm4a
-0.4229	4.838	0.8023	Eftud2
-0.5679	4.222	0.8023	Deptor
-0.5635	3.899	0.8026	Pdzrn3
-0.5182	4.334	0.8037	Dbn1
0.636	3.921	0.8037	Meaf6
-0.5683	4.588	0.8037	Mbd3
-0.3916	5.578	0.8037	Supt16
-0.3927	5.239	0.8051	Gbe1
0.4091	4.838	0.8051	Pip4p1
-0.6487	4.125	0.8051	Pfdn2
0.5038	4.612	0.8051	Pknox2
-0.5961	4.086	0.8051	Ppip5k1
-0.407	6.396	0.8051	Nfic
-0.5866	3.774	0.8051	Gtf3c2
-0.3298	12.29	0.8051	Gphn
-0.4831	4.828	0.8051	Drp2
0.6328	7.372	0.8051	Large1
0.3478	6.472	0.8053	Dennd5a
-0.4732	5.792	0.806	D130009I18Rik
-0.3019	6.739	0.807	Tmem131
0.3303	8.258	0.8079	Ppp3ca
0.4941	5.574	0.8079	Ifnar2
1.074	4.806	0.8079	Ctsc
-0.5394	4.83	0.8079	Ndufaf4
0.5449	4.707	0.8079	Ikbkb
0.4423	5.025	0.8079	Tifa
0.3635	6.301	0.8079	Amfr
0.3542	5.578	0.8079	Prdm5
-0.5522	3.954	0.8079	Letm2
-0.482	4.343	0.8079	Cbll1
0.4075	5.914	0.8079	Tfrc
-0.4102	6.511	0.811	Bcar3
-0.5453	4.418	0.811	Mapk8ip1
0.5002	6.007	0.811	Dock11
-0.3712	6.238	0.811	Actn4
-0.4628	6.516	0.811	Lrrc8a
0.9908	3.765	0.811	Tspan13
-0.7306	3.879	0.811	Dgcr6
-0.4274	4.648	0.811	Zc3h18
-0.3706	9.131	0.811	Slco1c1
0.4552	5.48	0.811	Clta
-0.3903	5.258	0.811	Ammecr1l
-0.608	4.355	0.811	Gga1
-0.5894	3.984	0.811	Tada2a
0.454	4.671	0.811	Phc1
-0.4034	5.093	0.811	Polr2m
-0.4362	5.161	0.811	Stk39
-0.3539	5.757	0.811	Slc30a9
-0.7461	3.73	0.811	Trmt10c
-0.6412	4.062	0.811	Arfgap1
-0.3901	5.427	0.811	Prpf6
0.5022	4.067	0.8113	Psme1
0.5591	4.086	0.8124	Dcbld2
-0.3554	5.195	0.8131	Marchf2
-0.4233	4.805	0.8131	Rps18
0.3427	5.611	0.8131	Fbxl3
0.701	3.934	0.8131	Ccdc106
-0.4435	6.207	0.8131	Sec14l2
0.5673	4.012	0.8131	Rcc2
0.5823	7.62	0.8136	Wwox
-0.3788	5.486	0.8136	Api5
-0.5136	4.893	0.8136	Prdm16os
-0.4928	4.411	0.8136	Dhx29
0.3983	5.125	0.8136	Tgfbrap1
-0.5165	4.428	0.8136	Cluap1
-0.3581	6.496	0.8136	Nudt3
0.5424	3.968	0.8136	Fem1a
0.307	6.631	0.8146	Ube2k
0.5585	4.201	0.8146	Pacc1
-0.6855	4.121	0.8146	Fmo1
-0.5383	4.503	0.8146	Tbcb
0.3895	5.095	0.8155	Hnrnpa1
-0.4471	8.029	0.8167	Sdc4
-0.3357	6.001	0.8175	Smarcc1
0.4869	5.839	0.819	Smurf2
-0.5779	4.441	0.819	Rrp8
0.3896	6.316	0.819	Arpc2
-0.5244	4.76	0.819	Rps13
-0.547	3.906	0.819	A930005H10Rik
-0.4136	4.756	0.8192	Ppp1r8
0.4193	4.973	0.8192	Dync1li2
-0.4091	6.864	0.8198	Camk2n1
-0.428	8.471	0.8198	Fermt2
0.6549	4.234	0.8198	Ofd1
0.3766	5.946	0.8198	Lyst
0.5388	4.03	0.8198	Supv3l1
-0.5734	5.113	0.82	Arhgef10
0.3259	8.263	0.82	Prex1
0.3773	6.795	0.82	Shisa9
-0.4402	4.306	0.82	Stx1b
0.6221	4.667	0.82	Fbxw2
-0.475	5.9	0.82	Foxg1
-0.4285	5.422	0.82	Rpl23a
0.4175	6.195	0.82	Smg6
-0.6318	4.225	0.82	Las1l
-0.3506	6.133	0.82	Slc25a23
-0.33	7.592	0.82	Kpna1
-0.3968	5.505	0.82	Tuba4a
-0.4845	5.2	0.82	Aldh9a1
0.296	7.594	0.82	Wwc1
-0.4767	4.89	0.82	Klhl2
0.7781	4.134	0.82	Gm4221
-0.481	5.228	0.82	Dynll2
-0.4835	4.652	0.82	Ppil2
0.3475	5.556	0.82	Clpb
0.423	5.09	0.82	4632427E13Rik
-0.4567	5.505	0.82	Gde1
-0.5546	3.945	0.82	1810055G02Rik
-0.7768	4.597	0.82	Nrros
0.4445	4.669	0.82	3830406C13Rik
0.4003	7.731	0.82	Fbxl17
0.4397	6.025	0.82	E130307A14Rik
-0.542	4.191	0.82	Eif3i
0.3453	7.368	0.82	Mbd5
0.3549	6.141	0.82	Map3k2
-0.6746	3.814	0.82	Gpaa1
-0.3671	5.716	0.82	Hnrnpul2
0.7972	3.423	0.82	Kin
-0.4368	4.499	0.82	Bcar1
0.5215	5.471	0.82	Lrig2
-0.4197	4.781	0.82	Atf4
0.6624	5.626	0.82	Sppl3
-0.4403	4.701	0.82	Ppp1r37
-0.4795	8.282	0.82	Ezr
-0.7071	5.209	0.82	Irs2
-0.3494	6.765	0.82	Mat2a
0.652	3.944	0.82	Slc46a3
0.3397	6.177	0.82	Atxn7
0.4345	4.431	0.82	Cfap418
0.3834	5.47	0.82	Tmem234
-0.6659	3.822	0.82	Heatr6
0.2908	7.327	0.82	Abcd2
0.5038	4.506	0.82	Rp9
-0.3637	5.226	0.82	Dusp22
0.4007	7.744	0.82	Laptm4a
-0.4429	4.442	0.82	Rnf19a
-0.2966	6.115	0.82	Mapkap1
-0.5277	5.136	0.82	Cops3
0.458	5.457	0.82	Pdss2
0.2723	7.417	0.82	Lnpep
0.5051	4.191	0.82	Rnf149
-0.2895	8.14	0.82	Daam2
-0.281	9.564	0.82	Plcb1
0.6194	3.921	0.82	Sepsecs
-0.366	5.753	0.82	Prpf38b
0.4931	4.934	0.82	Tpgs2
-0.4366	5.804	0.82	Cand1
-0.5453	3.851	0.82	Kmt5c
-0.4926	3.926	0.82	Rpl39
0.4571	4.547	0.82	Ganc
0.3436	5.876	0.82	Pibf1
-0.4197	6.266	0.82	Cox5a
-0.3271	6.307	0.82	N4bp2l2
-0.5522	5.379	0.8202	Vps4a
0.6023	4.633	0.8202	C030037D09Rik
0.3709	5.86	0.8202	Zzef1
-0.5311	3.944	0.8202	Atxn1l
0.6216	3.814	0.8202	Zfp251
0.6375	4.371	0.8202	Aagab
-0.4275	4.499	0.8202	Hmg20b
0.3351	5.846	0.8203	Wnt7a
0.3887	6.194	0.8203	Map4k3
-0.5542	5.615	0.8203	Hif3a
-0.3649	5.217	0.8203	Ptpn11
-0.4416	7.167	0.8203	Fdft1
0.5289	5.3	0.8216	Ano6
0.3842	5.326	0.8216	Mfap3
-0.3817	7.655	0.8216	Slc9a3r1
-0.376	5.682	0.8216	Mphosph8
0.571	4.211	0.8216	Rbks
-0.4405	4.503	0.8216	Zmat3
0.3882	5.838	0.8216	Actr3
-0.4318	5.367	0.8216	Rraga
-0.5013	4.558	0.8216	Golga7
-0.6769	3.738	0.8216	Creld2
-0.5719	4.238	0.8216	Them4
-0.4335	7.535	0.8216	Atp1b1
0.6382	4.065	0.8216	Fam228a
-0.3046	7.607	0.8216	Rasa2
-0.4261	5.811	0.8216	Scd1
0.3664	5.277	0.8216	Snx19
0.4439	5.183	0.8216	Slc30a1
0.4669	5.016	0.8216	Cbfa2t2
0.3286	6.246	0.8216	Ube2d3
0.5342	4.573	0.8216	Ccdc80
0.6698	3.797	0.8216	Tmem14c
0.4769	4.595	0.8216	Abhd13
0.3596	8.366	0.8216	Nckap5
-0.2783	6.775	0.8216	Golgb1
0.3344	5.593	0.8216	Akr1a1
0.6229	4.343	0.8216	Atad3a
0.4568	4.614	0.8216	Ecd
0.3533	7.993	0.8216	Astn1
-0.4499	9.783	0.8216	Ckb
0.4065	4.758	0.8216	Pigg
-0.4223	5.119	0.8216	Eloa
0.5346	3.931	0.8216	Spindoc
-0.4209	5.45	0.8216	Iqgap1
-0.6868	3.692	0.8216	Mipep
0.5376	4.838	0.8216	A330033J07Rik
-0.4094	4.771	0.8223	Chmp5
-0.3733	5.237	0.8223	Ist1
0.4912	5.466	0.8244	Gabrg3
-0.3865	4.895	0.8246	Zfp809
0.3794	4.771	0.8246	Maea
-0.4121	5.5	0.8249	Cipc
-0.4767	6.368	0.8254	2610035D17Rik
0.4674	4.473	0.8255	Dph6
-0.4732	4.72	0.8256	Palm
0.4617	5.439	0.8258	Ccni
0.6139	4.283	0.8258	Arxes2
0.4761	5.279	0.8258	Otud4
0.4621	4.645	0.8258	Ubp1
0.5371	3.973	0.8258	Kctd6
0.2617	9.524	0.8258	Pbx1
0.4062	5.081	0.8258	Ephx1
0.5069	4.642	0.8258	Fhl1
0.4545	4.427	0.8258	Lrrc9
0.4508	5.334	0.8258	Nrarp
1.104	7.256	0.8258	Arsb
-0.5843	3.964	0.8258	Pde12
0.7868	3.796	0.8258	Slc25a42
0.4019	5.194	0.8258	Kiz
-0.5396	3.99	0.8258	Gga3
0.3935	5.727	0.8258	Phf20
-0.5153	4.667	0.8258	Cth
-0.3576	4.887	0.8258	Bcl2l13
-0.3233	8.693	0.8258	Ahcyl1
0.3878	5.045	0.8258	Fat4
0.6349	4.248	0.8258	Slc35a2
-0.4476	4.347	0.8258	Elp3
0.402	4.886	0.8258	Morc2a
0.3637	7.108	0.8258	Peli2
-0.2894	8.483	0.8258	Dclk1
-0.3042	6.027	0.8258	Slc20a1
0.5929	3.946	0.8264	Fancc
0.4799	4.654	0.8277	Washc3
-0.4366	4.757	0.8277	Plcb3
0.419	4.769	0.8277	Wwp2
-0.471	4.493	0.8277	Med7
-0.3824	6.245	0.8286	Mcur1
0.3363	5.198	0.8286	Rpl37
0.4092	5.307	0.8286	Copg2
0.4601	4.168	0.8286	Tmem60
-0.3926	4.847	0.8286	Dctn5
0.2791	7.043	0.8289	Zfp148
-0.4189	8.098	0.8289	Zswim6
0.7868	6.015	0.8289	Smad3
-0.3231	6.843	0.8289	Rab5a
0.6548	4.228	0.8311	Brcc3
-0.2926	6.637	0.8311	Setd2
-0.443	4.441	0.8311	Bag3
-0.4508	4.881	0.8311	Lmcd1
0.4507	4.822	0.8311	Zmym3
0.5296	3.934	0.8311	Nceh1
-0.3905	5.171	0.8311	Hnrnpf
-0.3197	5.797	0.8311	Tcea1
0.4344	5.933	0.8311	Tut4
0.4587	5.034	0.8311	Arpp19
-0.511	4.237	0.8311	Slc46a1
0.328	7.172	0.8313	Zfp608
-0.4408	5.381	0.8319	Rplp1
-0.4655	4.592	0.8319	Srp19
-0.5017	4.454	0.8337	Eif3f
0.3089	5.903	0.835	Cpd
-0.7273	3.745	0.8351	Arl2
-0.5994	4.027	0.8353	Higd2a
0.4172	4.441	0.8353	Maf1
-0.4771	4.908	0.8354	Hnrnpa0
0.4664	5.371	0.8355	Dgkz
-0.3391	5.987	0.8358	Immt
-0.4339	5.633	0.8363	Disp3
0.3332	7.206	0.8373	Tmed5
-0.4778	4.583	0.8373	Mrpl18
-0.4637	4.15	0.8373	Cog7
-0.4113	5.412	0.8373	Stx18
0.2761	8.972	0.8373	Celf2
0.4366	5.223	0.8373	Iars2
-0.319	6.618	0.8373	Tsc22d1
0.3775	5.226	0.8373	Cbx1
0.5755	4.913	0.8373	Camk1
-0.4951	5.518	0.8373	Flrt1
0.3757	5.139	0.8373	Slc44a1
0.3852	5.121	0.8373	Brip1os
0.4677	4.092	0.8373	Npepl1
-0.3383	6.097	0.8373	Glyr1
-0.5731	4	0.8373	Plin2
-0.4244	6.727	0.8373	Aff1
-0.6437	3.674	0.8373	Rtkn
-0.3073	5.551	0.8373	Smad5
0.3728	5.993	0.8373	Osbpl8
0.4625	5.083	0.8373	Mapkapk2
0.4729	4.243	0.8373	Hacd1
0.4967	4.773	0.8373	Rtp4
0.2713	8.024	0.8373	Camk2g
-0.2952	6.143	0.8373	Zfp516
0.5833	6.977	0.8373	Btbd9
0.5978	4.118	0.8373	Zfp395
-0.3665	5.082	0.8373	Sec23b
0.4272	4.485	0.8373	Trappc3
-0.6797	4.489	0.8373	Zbtb33
-0.3588	6.003	0.8373	Kifbp
0.344	5.294	0.8376	Dpm1
-0.3042	6.652	0.8381	Fgf1
-0.5165	4.058	0.8388	Mul1
-0.4689	4.13	0.8388	Mtx1
0.3217	7.776	0.8388	Phf21a
0.3604	5.88	0.8389	Cul5
0.3975	5.556	0.8396	Clcn6
-0.407	4.521	0.8396	Copz1
-0.5247	4.124	0.8396	Irgq
0.4321	4.649	0.8396	Rab2b
-0.3587	7.729	0.8396	Gprc5b
-0.5563	4.42	0.8396	Fis1
0.3623	6.081	0.8396	Spop
0.4949	3.827	0.8396	Rusf1
-0.773	5.898	0.8396	Rbfox1
-0.4146	4.865	0.8396	Golph3l
0.4545	4.416	0.8399	Dhtkd1
-0.5863	4.068	0.8404	Tmem198b
0.3888	5.131	0.8446	Wrn
-0.4084	5.565	0.8446	Selenow
-0.2542	7.543	0.8446	Enah
-0.4531	4.313	0.845	Cyth2
0.3309	6.324	0.845	Setd3
0.5321	4.375	0.845	Pdcd11
-0.3366	5.606	0.845	Mtch2
0.4751	4.38	0.845	Cln5
0.3722	5.785	0.845	Pam
0.3853	5.446	0.845	Atp13a3
0.407	4.564	0.845	Zdhhc3
0.2647	9.502	0.845	Maml2
-0.3946	7.601	0.845	Tubb2b
-0.4543	5.519	0.845	Nap1l5
0.361	5.904	0.845	Trib2
-0.3581	4.917	0.845	Tmem248
-0.5336	5.423	0.845	Pamr1
-0.3067	6.295	0.845	Syn2
-0.389	4.696	0.845	Rufy1
-0.3393	8.487	0.8453	Fth1
0.5263	3.75	0.8455	Gtpbp1
-0.5446	3.832	0.8485	Mrpl52
-0.4	5.026	0.8485	Rps2
0.4131	4.705	0.8485	Adgra3
0.3275	6.154	0.8485	Pik3ca
0.3427	7.212	0.8485	Tmem135
-0.4828	4.856	0.8485	Tmem129
0.4472	4.488	0.8485	Uxs1
-0.3484	5.282	0.8485	Pdhb
0.4228	5.105	0.8485	Tmem209
-0.4377	4.821	0.8485	Rbm42
0.4788	5.244	0.8495	Rbpj
0.4968	3.919	0.8495	Klhl25
-0.3209	8.013	0.8495	Mapk4
0.5758	4.085	0.8495	Top3b
-0.4565	4.166	0.8501	Cep20
0.4402	6.609	0.8501	Rnf180
0.383	5.057	0.8509	Eif2s1
-0.5523	5.414	0.8512	Dchs1
0.3256	6.281	0.8512	Arhgap42
0.4354	5.78	0.8512	Zc3h12b
-0.3574	5.106	0.8527	Armc1
0.529	4.819	0.8528	Msantd2
0.2468	8.033	0.8528	Nr3c1
0.3489	5.746	0.8528	Sgpl1
0.3764	5.048	0.8528	Jup
0.4454	5.599	0.8528	Daglb
-0.521	4.115	0.8528	Fads3
0.2951	7.777	0.8528	Lpp
0.3421	6.232	0.8528	Uqcrc1
0.4293	6.005	0.8528	Eri3
0.4653	6.722	0.8528	Atxn7l1
0.304	6.147	0.8528	Eif4a1
0.6249	5.282	0.8528	Slc4a7
0.3671	5.98	0.8528	Specc1l
-0.394	4.963	0.8528	Stk40
0.6456	4.999	0.8528	Ttc7
0.3543	4.789	0.8528	Tiam2
0.3246	5.858	0.8528	Gtf2a1
0.3181	5.454	0.8528	Erap1
0.4135	5.403	0.8528	Nono
0.84	3.92	0.8528	Tdrd7
-0.4895	4.299	0.8528	Gm44257
0.639	4.29	0.8528	Cd320
0.2815	7.929	0.8528	Sgip1
0.3062	5.541	0.8528	Uggt1
-0.2722	6.502	0.8528	Eif3a
-0.3852	4.734	0.8528	AA387883
0.4672	4.224	0.8528	Dcakd
-0.361	6.013	0.8528	Tmf1
-0.289	6.753	0.8529	Cep350
0.2931	5.733	0.8529	Lrp8
-0.4969	4.717	0.8529	Ssx2ip
-0.388	5.156	0.8529	Synpo2
0.5263	4.718	0.8529	Tbc1d4
0.4442	5.169	0.8529	Dcaf5
-0.3515	5.196	0.8529	Rnf182
0.3169	5.457	0.8529	Ergic1
0.5562	5.025	0.8529	Eefsec
0.2916	6.523	0.8529	Gpr146
-0.3601	6.624	0.8529	Slc48a1
0.3971	5.185	0.8529	Ythdf1
-0.2625	8.536	0.8529	Spag9
0.4072	6.039	0.8529	Arhgap26 - ENSMUSG00000118193
0.3145	5.692	0.8529	Atxn2l
0.3145	7.525	0.8529	Luc7l2
0.3505	4.952	0.8529	Gm10561
-0.4752	4.137	0.8529	2610021A01Rik
-0.4772	4.773	0.8529	Fxr2
0.3459	6.29	0.8529	Ctsa
0.4621	3.805	0.8529	Triqk
0.5934	3.722	0.8529	Ermard
0.4475	4.31	0.8529	Disp1
0.4576	4.023	0.8529	Slc35f5
0.3859	5.429	0.8529	Slc16a1
0.3799	4.956	0.8529	Wdr45b
0.4882	3.983	0.8529	Zfp729b
0.9786	3.191	0.8529	Dnhd1
0.3869	5.303	0.8529	Map3k7
-0.2747	6.421	0.8529	Ubxn4
-0.3921	4.816	0.8529	Ctdsp1
-0.2976	5.846	0.8529	Rimoc1
-0.3516	6.034	0.8529	Mlec
0.4475	7.107	0.8529	Ppp1r9a
0.7034	3.682	0.8529	A530072M11Rik
-0.3082	7.224	0.8529	Foxo1
0.381	4.982	0.8529	Rab5if
-0.4877	4.162	0.8529	Htatsf1
0.5194	4.718	0.8529	Angel2
-0.3381	5.387	0.8529	Phf2
-0.5201	4.242	0.8529	Pex11a
-0.324	6.8	0.8529	Cyp2d22
0.2979	6.558	0.8529	Ythdf3
-0.3612	5.331	0.8529	Trip4
-0.4876	4.159	0.8529	ENSMUSG00000120639
-0.4764	4.931	0.8529	Hsph1
0.4606	4.221	0.8529	Dnase2a
-0.4742	4.612	0.8529	Hars
0.3505	5.995	0.8529	Gm21992
0.3215	5.501	0.8529	Tasor2
-0.251	7.667	0.8529	Gsk3b
-0.4152	4.841	0.8529	Elmod3
-0.4667	4.006	0.8529	1110059E24Rik
-0.4058	4.855	0.8529	Tspyl1
-0.2803	6.07	0.8529	Cdip1
-0.6165	3.803	0.8529	Fam149a
0.3685	5.809	0.8529	Tut7
-0.254	7.947	0.8529	Hook3
0.3414	5.766	0.8529	Med1
-0.6413	3.862	0.8529	Vangl2
-0.477	4.094	0.8529	Fam216a
0.4428	4.111	0.8529	2610044O15Rik8
0.2695	6.55	0.8529	Klhl24
0.5133	4.341	0.8529	Asf1a
-0.5291	3.685	0.8529	Mtres1
-0.2705	7.437	0.8529	Washc2
0.5329	3.819	0.8529	Ybx3
0.3001	6.344	0.8529	Pik3c2a
0.3631	4.726	0.8529	Ensa
0.5702	3.71	0.8529	Tceal3
-0.3482	5.457	0.8529	Mpc1
0.6092	4.712	0.8529	Mettl15
-0.7363	4.193	0.8529	Ahnak
0.3662	6.48	0.8529	Ccdc190
-0.4239	5.024	0.8529	Aatk
-0.4633	3.922	0.8529	Tmem218
0.3502	4.904	0.8529	Hmox2
-0.4	5.363	0.8529	Psph
-0.3762	8.34	0.8529	Csrp1
-0.5406	3.759	0.8529	Ypel2
0.403	4.52	0.8529	Pnpla6
-0.2666	7.211	0.8529	Zfr
-0.3005	6.562	0.8529	Pdk2
0.2751	6.478	0.8529	Tmem178b
-0.3875	4.975	0.8529	Ints1
-0.2969	5.779	0.8529	Lats1
-0.3417	4.861	0.8529	Ahsa1
0.4536	4.445	0.8529	Dab2
-0.289	6.521	0.8529	Cul3
-0.3393	5.36	0.8529	Tspan12
-0.5103	4.32	0.8529	Nat1
-0.451	5.243	0.8529	Dnm3
-0.3704	8.105	0.8529	Gstm5
-0.3829	5.217	0.8529	Msl1
0.3589	6.443	0.8529	Nsmce2
-0.5268	3.753	0.8529	Neurl4
0.3409	6.393	0.8529	Cog5
-0.3711	5.446	0.8532	Zkscan3
0.4085	4.596	0.8532	Trnt1
-0.3695	4.937	0.8532	Lsm12
0.6244	4.044	0.8532	Zxdc
0.4279	4.398	0.8532	Rbm4
0.4245	4.084	0.8532	Ninl
0.5436	4.446	0.8532	Exd2
-0.426	4.619	0.8532	Nop14
-0.2717	11.04	0.8532	Luzp2
-0.4007	6.191	0.8532	Cnp
0.3207	4.967	0.8532	Hgsnat
-0.3422	5.172	0.8532	Slc25a17
-0.2799	7.124	0.8532	Srebf2
-0.3199	5.269	0.8532	Myrip
0.5004	4.048	0.8532	Adnp2
-0.3721	4.824	0.8532	Ube2n
0.241	7.13	0.8532	Usp9x
0.4057	4.502	0.8532	Platr25
0.433	4.548	0.8532	Edrf1
-0.3928	4.619	0.8532	Snapc1
0.7323	6.242	0.8532	Pld1
-0.2624	7.559	0.8532	Gtf2i
0.6528	3.687	0.8532	Angptl4
-0.4838	3.971	0.8532	Pick1
0.5488	4.792	0.8539	Prkch
-0.3297	5.47	0.8539	Tcp1
0.4187	4.555	0.8539	Amn1
-0.2538	9.845	0.8539	Gnao1
-0.4028	4.681	0.8544	Gm37679
0.3819	6.574	0.8544	Rasal2
0.5068	4.125	0.8544	Kcnc4
0.4964	4.089	0.8562	A330076H08Rik
0.4264	4.26	0.8562	Reck
-0.3591	5.525	0.8562	Pank1
-0.2977	6.956	0.8562	Akt2
0.4044	6.269	0.8562	Cd9
-0.3229	5.303	0.8562	Tmem50b
0.4366	5.577	0.8562	Zbtb41
0.3927	4.787	0.8562	Klhl13
0.5123	3.937	0.8562	Ankrd50
-0.5307	4.073	0.8562	Zfp428
0.3344	5.246	0.8562	Zfp943
0.3912	5.034	0.8562	Eif2ak1
-0.4524	4.968	0.8562	Tprgl
0.3555	5.553	0.8562	Ldlrad3
-0.4454	4.222	0.8562	Ift172
-0.4387	4.316	0.8562	Sap30bp
0.4365	4.954	0.8562	Rp2
0.3416	5.559	0.8562	Smim14
0.5266	4.567	0.8562	Rnd3
0.3473	6.098	0.8562	9930021J03Rik
-0.2909	6.058	0.8562	Nfasc
-0.4538	4.107	0.8562	Megf8
-0.4773	5.329	0.8562	Rabac1
-0.4911	4.246	0.8562	Paqr3
-0.3372	5.21	0.8562	Btbd3
0.3343	5.26	0.8562	Zfp654
-0.442	4.021	0.8562	Prpf4
0.4773	4.261	0.8562	Mpv17
0.4572	4.802	0.8562	Szrd1
-0.3546	5.115	0.8562	Wtap
0.2542	7.531	0.8562	Kmt2e
-0.4754	5.032	0.8562	Swi5
-0.4782	4.262	0.8562	Rit1
-0.445	5.384	0.8562	Slc12a2
-0.4221	4.243	0.8562	Pin1
-0.4162	4.908	0.8562	Emp2
0.364	7.142	0.8562	Trio
-0.2667	6.448	0.8562	Efcab14
-0.4434	5.102	0.8562	Fem1b
0.2657	6.087	0.8562	Prrx1
-0.2674	7.957	0.8562	Megf10
-0.8254	4.046	0.8562	Nrbp2
0.2648	6.39	0.8562	Kdm3b
-0.4096	5.161	0.8562	Rps14
0.4564	5.983	0.8562	Agps
0.3874	6.106	0.8562	Rsrc1
0.3369	4.913	0.8562	Rnf2
-0.353	4.888	0.8562	Kdm6b
-0.5009	3.887	0.8562	Lpar4
-0.3869	5.407	0.8562	Cox6b1
-0.5245	3.963	0.8562	Gm15446
0.2746	6.621	0.8562	Rabgap1
-0.669	4.058	0.8562	Cmya5
-0.2304	7.58	0.8562	Numa1
0.2717	6.761	0.8562	Ppp2r5c
0.3667	4.645	0.8562	Tmem259
0.395	4.32	0.8562	Gm33680
0.4403	5.089	0.8562	Eif2ak4
0.4975	4.36	0.8562	Sec13
0.2961	6.503	0.8562	Celrr
0.3204	6.232	0.8562	Mir9-3hg
-0.3578	6.352	0.8562	Ndufv2
0.3136	5.058	0.8562	Pi4kb
-0.3701	5.204	0.8562	Pex2
0.4894	4.46	0.8562	Gm31763
-0.6639	3.84	0.8562	Tmem14a
0.3491	6.155	0.8562	Ccny
-0.2886	5.432	0.8562	Fubp3
0.544	4.078	0.8562	Nol11
0.3508	7.816	0.8562	Ptprm
0.4353	4.745	0.8562	Tmem87b
0.4522	6.458	0.8562	Babam2
0.2774	6.01	0.8562	Ino80d
0.4073	4.224	0.8562	Pik3r4
0.3449	5.66	0.8562	Exoc2
-0.347	6.184	0.8562	Abhd4
-0.2375	7.213	0.8562	Add1
-0.3682	5.394	0.8562	Cfap36
-0.299	5.537	0.8562	Chordc1
-0.4372	5.001	0.8562	Ndufb7
-0.3915	4.279	0.8562	Fam50a
0.4671	4.166	0.8562	Naa30
-0.3461	5.163	0.8562	Rhobtb2
-0.2588	9.939	0.8562	Prex2
-0.3235	5.129	0.8562	Inpp5a
-0.295	5.588	0.8562	Ipo5
-0.3074	6.109	0.8562	Dnaja1
-0.4875	4.141	0.8562	Nudt16l1
0.2686	6.793	0.8562	Atl2
0.2754	6.045	0.8562	AU040320
-0.2829	6.205	0.8562	Sos2
-0.4487	3.934	0.8562	Ciao2a
0.4162	4.483	0.8562	Zfp386
0.2519	6.343	0.8562	Pmp22
-0.3853	7.028	0.8562	Hapln1
-0.4681	3.945	0.8562	Sox13
0.7349	7.594	0.8562	Fhit
-0.559	4.939	0.8562	Ndufs6
0.3454	8.083	0.8562	Fgf13
-0.4977	4.151	0.8562	Atp5g1
0.604	3.618	0.8562	Ndufa1
0.2311	6.853	0.8562	Arhgap35
-0.4484	4.783	0.8562	Kirrel2
0.4425	5.117	0.8562	Tbk1
-0.3857	4.515	0.8562	Cant1
-0.4652	5.469	0.8562	Mageh1
0.3794	5.811	0.8562	Lgalsl
0.4482	4.879	0.8562	Mtf2
0.4526	3.91	0.8562	Brix1
0.4337	4.481	0.8562	Qsox1
-0.4848	3.74	0.8562	Stat2
-0.4117	4.582	0.8562	Rhou
-0.2917	6.045	0.8562	Wwp1
-0.4006	4.368	0.8562	Zfp933
0.405	4.393	0.8562	Adam15
-0.4414	4.993	0.8562	Cyp20a1
-0.3816	4.552	0.8562	Cep83
0.484	4.099	0.8562	Zfp958
-0.2893	6.258	0.8562	Copa
0.3513	5.008	0.8562	Usp38
0.3523	4.803	0.8562	Wdr43
0.4475	4.184	0.8562	Gm37606
-0.3344	5.887	0.8562	Dnajb6
0.4196	5.181	0.8562	Ago1
-0.3372	4.928	0.8562	Rbx1
0.4571	4.175	0.8562	Sgpp1
-0.517	3.9	0.8562	Tomm7
1.036	3.311	0.8562	Trp53cor1
-0.2563	7.36	0.8562	Magi3
0.4584	5.021	0.8562	Nr6a1
0.4273	4.317	0.8562	Acad8
0.2699	6.675	0.8562	Hk1
0.4801	4.277	0.8562	1700003M07Rik
-0.4546	4.57	0.8562	Foxk1
0.2442	6.677	0.8562	Hif1a
-0.3178	7.188	0.8562	Pfkp
0.4262	4.684	0.8562	Zmym6
0.2522	6.415	0.8562	Rev3l
0.364	5.789	0.8562	Alpk1
-0.4971	4.059	0.8562	Pcbd2
-0.396	6.167	0.8562	Ndufb9
-0.5184	3.832	0.8562	Pnma8b
0.432	4.248	0.8562	Zfp655
0.4314	4.109	0.8562	Ibtk
0.2359	11.73	0.8562	Gpc5
-0.3388	4.821	0.8562	Rtf2
0.5309	4.087	0.8562	Tesk2
0.2721	6.825	0.8562	Bltp1
0.4266	4.694	0.8562	Prpsap2
0.365	5.082	0.8562	Dapk1
0.34	5.334	0.8562	Sned1
0.4682	3.672	0.8562	Spats2
-0.621	3.791	0.8562	Polr2g
0.3851	5.143	0.8562	Ctdspl2
-0.3175	5.205	0.8562	Phf8
-0.484	4.723	0.8564	Gm21988
0.3747	7.795	0.8564	Diaph2
0.2947	5.799	0.8574	Rabl6
-0.4189	4.347	0.8597	Gars
0.5056	4.146	0.8597	Dcaf10
0.3793	4.448	0.8603	Arl13b
0.4493	5.136	0.8603	Plekha1
0.3969	5.252	0.8603	Lrrfip2
0.3633	4.514	0.8603	Nudt4
0.3388	4.835	0.8603	Esf1
-0.3023	5.289	0.8603	Rpl22
0.284	5.921	0.8603	Erlec1
-0.3674	9.095	0.8603	Mt1
0.3468	6.558	0.8603	Peli1
-0.3393	5.034	0.8603	Mrs2
-0.2847	5.355	0.8603	Polb
-0.2591	5.924	0.8603	Atf2
-0.4659	4.702	0.8603	Nlgn2
0.5178	5.513	0.8603	Senp2
-0.3004	7.961	0.8603	Nrxn2
-0.316	5.786	0.8603	Ankrd40
-0.3105	5.175	0.8603	Znfx1
-0.3517	4.929	0.8603	Ncbp2
0.3508	5.143	0.8603	Shoc2
-0.3504	5.764	0.8603	Smg7
0.2677	6.255	0.8603	Erp44
-0.4753	4.915	0.8603	Drap1
0.4115	4.774	0.8603	Agtpbp1
-0.2989	6.226	0.8603	Tuba1a
-0.2997	6.164	0.8603	Thra
0.2434	9.167	0.8614	Pcdh7
0.3089	7.032	0.8614	Exoc6b
-0.4458	4.752	0.8621	Fam114a2
0.4369	4.404	0.8621	Med17
-0.3327	5.379	0.8621	Scaf4
-0.4134	4.866	0.8621	Poldip2
-0.2629	5.677	0.8621	Yap1
0.2776	6.918	0.8623	Adam10
-0.3485	4.479	0.8624	Atp13a5
0.2975	5.466	0.8625	Asb3
0.4208	4.082	0.863	Scg5
-0.5079	3.962	0.863	Rmdn3
-0.45	4.267	0.863	Sh2b1
-0.4358	4.727	0.863	Thy1
0.2433	7.939	0.863	Fmnl2
-0.3499	5.164	0.863	Pogz
0.5019	3.799	0.863	Nprl3
0.3342	6.338	0.863	Vps41
0.4168	4.164	0.8634	Wiz
0.2673	6.221	0.8636	Ndufs1
-0.3304	5.295	0.8636	Chn1
-0.4047	4.414	0.8636	Ubl7
0.4166	4.586	0.8638	Polr3b
0.2373	6.68	0.8638	Ptpn13
0.3257	6.692	0.8638	Ece1
-0.2494	6.489	0.8638	Tulp4
-0.474	4.054	0.8638	Narf
-0.3416	4.935	0.8638	Vipas39
-0.2566	8.02	0.8638	Akap9
0.3833	7.309	0.8643	Ddx3x
-0.4257	4.279	0.8643	Kctd17
-0.5352	4.296	0.8644	Slc36a1
0.3509	4.994	0.8644	Rufy2
0.3333	4.634	0.8644	Ctns
0.3471	5.357	0.8644	Epb41l5
-0.3644	4.745	0.8644	Cbr1
-0.258	6.829	0.8644	Bptf
0.58	3.741	0.8644	Leng1
-0.266	7.567	0.8644	Spacdr
0.4767	4.059	0.8644	Pcgf3
0.3773	4.864	0.8644	Cdc40
0.4995	4.2	0.8644	Alkbh1
-0.3308	5.092	0.8644	Dnaja3
-0.4386	4.569	0.8644	Cacng7
-0.394	4.599	0.8644	Entpd6
0.3672	5.123	0.8644	Ap2m1
0.3985	5.437	0.8644	Stau2
-0.3359	6.098	0.8644	S100a16
-0.5793	3.951	0.8644	Ints9
0.241	7.749	0.8644	Rnf13
0.3918	4.091	0.8644	Dnmt1
1.253	4.505	0.8644	Nhs
0.5928	8.199	0.8644	Mbnl1
-0.316	4.965	0.8644	Rps27
0.3119	5.052	0.8644	Clk4
0.3491	6.868	0.8644	Cyp7b1
0.3346	5.346	0.8644	Suco
-0.4707	4.037	0.8644	Dmwd
0.3087	5.105	0.8644	Smo
0.5327	3.677	0.8644	Dedd
-0.3414	6.041	0.8644	Atn1
-0.4154	4.653	0.8644	Orai1
0.4225	4.839	0.8644	Peds1
-0.4478	4.37	0.8644	Opa3
0.3399	5.078	0.8644	Plekhm2
-0.39	4.371	0.8644	Ddhd2
-0.3113	5.527	0.8644	Nsf
0.5206	4.534	0.8644	Sfi1
-0.2962	6.94	0.8644	Sel1l
0.6433	3.636	0.8644	Atp2b4
0.3792	5.176	0.8644	Sec11a
0.473	4.092	0.8644	Fhip1b
0.354	5.392	0.8644	Qser1
-0.2961	6.65	0.8644	Cbs
0.4917	4.023	0.8644	Yae1d1
0.2281	7.392	0.8644	Rab2a
-0.2987	5.432	0.8644	Bag6
0.2995	5.846	0.8644	Sgce
-0.5629	3.819	0.8644	Lonrf2
-0.2843	13.68	0.8644	Slc1a2
0.5246	4.377	0.8644	Eif4e2
0.3995	5.055	0.8644	Pced1b
-0.3379	5.507	0.8644	Rplp2
-0.3568	4.485	0.8644	Trp53inp2
0.4459	5.206	0.8644	Stimate
0.3857	4.169	0.8644	Bccip
-0.3351	5.295	0.8644	Mtmr9
0.4383	5.476	0.8644	Traf3
0.3743	4.197	0.8644	Cnpy2
0.3852	4.124	0.8644	Zfp639
-0.3092	5.091	0.8644	Calcoco1
0.4994	4.744	0.8644	Ccz1
0.2967	5.319	0.8644	Spata5
0.4031	4.731	0.8644	Gm1976
-0.4422	4.08	0.8644	Shld1
-0.4121	5.069	0.8644	Acot13
-0.4025	4.272	0.8644	Adrm1
-0.4379	4.854	0.8644	Ift57
0.47	3.766	0.8644	Thumpd2
-0.3961	4.074	0.8644	Nbn
0.3706	4.192	0.8644	Cfap97
0.4132	4.127	0.8644	Ucp3
-0.2957	5.015	0.8644	Kif3a
0.3262	5.096	0.8644	Ubxn2a
0.3048	5.507	0.8644	Cdyl
-0.3544	4.927	0.8644	Srp68
0.268	6.559	0.8644	Tmc7
0.3591	7.392	0.8644	Camk2d
-0.33	4.496	0.8644	Bpnt1
0.4273	4.167	0.8644	Lrrn2
0.2373	6.93	0.8644	Zfp521
0.3167	5.064	0.8644	Lipa
0.4238	4.206	0.8644	Flcn
-0.4813	4.335	0.8649	Btd
-0.4068	4.377	0.865	Ncapd3
-0.4507	3.926	0.865	Dnttip1
0.3414	4.76	0.8653	Cltb
-0.2602	6.302	0.8653	Crtc3
-0.3557	4.559	0.866	Arfgap2
-0.3234	5.681	0.866	Bcor
-0.4929	4.075	0.866	Topbp1
-0.3903	5.041	0.866	Immp1l
-0.2935	5.519	0.866	Itpr1
-0.3513	4.421	0.866	Snrpd1
0.3098	5.905	0.866	Mtpn
-0.3833	4.849	0.866	Cope
-0.483	4.425	0.866	Tmem200c
-0.5023	4.069	0.866	Tubgcp2
0.3413	6.638	0.866	Pygm
-0.5338	3.629	0.866	Kbtbd4
-0.2913	4.988	0.866	Chp1
-0.4325	4.018	0.866	Zfp746
0.3199	8.543	0.866	Fads2
0.4209	3.927	0.866	Tnip1
-0.3386	6.527	0.866	Lxn
0.2477	9.425	0.866	B3galt1
[truncated: 55,011 more rows]

## Sheet: DE-3_Ex_Neuron
logFC	AveExpr	p_val_adj	gene_names
-1.09	6.132	0.01197	Ide
-5.799	2.632	0.01197	A830036E02Rik
-1.231	6.697	0.01472	Btaf1
2.147	2.13	0.01691	Gm10138
1.596	4.022	0.01691	Zfp729a
1.513	3.441	0.01764	Arhgef40
-4.183	0.7537	0.01764	Gm5148
1.304	4.628	0.02513	Gabrg1
-2.484	2.458	0.02513	6430590A07Rik
1.683	3.25	0.02513	Gm31333
1.618	2.92	0.02513	Gm47469
0.9153	6.181	0.02513	Nme7
-1.257	6.001	0.03962	Ulk4
3.798	1.129	0.04111	Gm49692
1.075	7.88	0.04111	Prnp
-1.314	4.592	0.04336	Lyzl4
-1.65	3.075	0.05471	Gm26782
0.9102	4.229	0.05597	Glo1
2.276	2.658	0.05597	Vwa5b1
-1.142	5.451	0.06231	Tmem163
1.743	4.606	0.07416	Plekhb1
-1.056	4.373	0.07416	4833420G17Rik
-0.7589	6.316	0.07416	Sntb2
0.6584	7.532	0.07416	Xpr1
-2.107	1.197	0.07416	Krt12
-1.355	5.362	0.07416	A930015D03Rik
0.875	3.686	0.07416	Qsox1
0.5279	6.093	0.07707	Ppp1r21
-0.794	7.276	0.08539	Zbtb16
1.463	3.935	0.08807	Epb41l4a
-1.173	4.397	0.08807	Gm31508
1.299	4.438	0.08807	Id4
3.135	1.586	0.08962	Cfap77
-0.7421	7.856	0.104	Prickle1
1.293	2.308	0.104	H1f2
0.9553	5.382	0.1101	Cacna2d2
-0.7245	4.498	0.1101	Zfp157
0.7742	6.176	0.1114	Nrsn1
1.561	6.193	0.1114	Cfap54
-1.044	8.374	0.1149	Homer1
1.329	2.652	0.1168	Gpx3
0.5954	5.269	0.1168	D130040H23Rik
-0.5502	8.016	0.1181	Eif4g3
0.9529	3.201	0.1181	Lsm6
1.632	2.395	0.1181	Mmp15
-0.5254	8.45	0.1181	Asap1
-0.6444	5.433	0.1181	Unc5a
-0.6772	7.687	0.1181	St6galnac5
-2.479	2.759	0.1201	ENSMUSG00000120831
1.655	3.155	0.1201	Maob
-0.5261	6.473	0.1201	Cop1
-0.611	7.661	0.1201	Cacng3
-0.7255	8.567	0.1201	Fstl4
-0.4668	7.857	0.1201	Kcnb1
-0.6126	9.814	0.1201	Kctd16
-0.6026	11.03	0.1201	Opcml
1.262	2.623	0.1201	Pcdhgb7
-1.081	6.274	0.1201	Iqgap2
-0.6025	7.326	0.1213	Spred2
1.085	2.765	0.1221	Rwdd3
-0.6665	6.957	0.126	Nfix
-1.044	8.594	0.1317	Pex5l
-2.547	1.341	0.1317	Ptgs2os
-0.54	8.938	0.1317	Nell2
-0.7625	6.789	0.1317	Sik2
-1.399	5.718	0.1334	Egr3
1.201	2.572	0.1334	Rasa4
-0.5903	5.112	0.1334	Itpka
1.849	2.519	0.1334	Pafah2
-0.487	6.613	0.1334	Tra2a
-0.5904	7.436	0.1334	Dnajc1
-0.5779	5.541	0.1334	Mkx
-0.937	6.182	0.1334	Nptx1
1.055	2.68	0.1334	Gm38250
-0.6539	7.371	0.1337	9330162G02Rik
1.582	4.3	0.1337	Trpc3
1.269	3.519	0.1337	Gm46102
0.8006	3.304	0.1337	Rmc1
-0.7214	5.778	0.1337	Ube2ql1
-0.5213	8.747	0.1337	Otud7a
1.44	1.679	0.1337	Ttc39a
-2.596	1.231	0.1337	9630002D21Rik
-0.4503	6.33	0.1337	Chka
-1.092	5.506	0.1337	Epha10
-0.9515	4.844	0.1337	Gm4876
1.395	1.751	0.1337	Hddc3
1.282	2.218	0.1337	Zmynd12
-0.6306	8.111	0.1337	Nlk
-0.686	5.786	0.1337	Hectd2
1.073	3.411	0.1337	Ass1
0.694	6.16	0.1337	Trak2
0.8863	5.35	0.1346	D430019H16Rik
-0.8489	3.601	0.1346	Gm2415
-1.043	8.871	0.1346	Rgs6
-0.5522	7.28	0.1346	Iqsec2
-0.4402	5.647	0.1346	Rbm28
-0.7623	5.452	0.1346	Plekhg5
-0.8873	3.672	0.1346	Dusp7
-0.6258	5.86	0.1346	Ina
-0.9182	5.869	0.1346	Dok5
-0.6702	7.977	0.1346	Galnt18
0.5153	5.73	0.1346	Cspg5
-1.054	6.031	0.1346	Kcnk9
-0.8783	3.915	0.1346	Smg9
-0.8148	8.072	0.1346	Mical2
1.096	3.62	0.1346	Rcn1
-0.6469	8.27	0.1346	Hecw1
1.209	3.473	0.1348	Ntn4
-0.5615	5.741	0.1348	Fam131a
-0.684	4.337	0.1348	Gm42456
0.5951	5.001	0.1361	Ctsl
1.005	3.977	0.1361	Npc2
1.332	2.729	0.1361	Sowahc
-0.5462	8.07	0.1361	Nos1ap
-0.7006	7.545	0.1361	Enc1
-0.5829	5.904	0.1367	Prrt2
1.972	1.781	0.1388	Adgb
-0.6651	5.916	0.1388	Etv5
-0.3868	6.533	0.1388	Pkd1
-0.6669	5.112	0.1452	Lonrf1
-0.799	3.913	0.1452	4930419G24Rik
1.915	2.74	0.1452	Rgs5
-0.8139	6.057	0.1452	Pdp1
-0.4245	5.979	0.1455	Wipf2
-1.466	3.546	0.1508	Col26a1
-0.7903	6.692	0.1535	Satb2
-1.203	3.013	0.1549	Gm35835
0.6985	4.122	0.1549	Wdr25
-1.481	2.942	0.1549	Gm35161
1.383	1.677	0.1553	Lrrc75b
1.91	2.314	0.1553	Slc15a3
-2.598	1.471	0.1553	Gm10037
-0.9145	4.545	0.1553	Cbfa2t3
-0.4299	5.287	0.1553	Mal2
-0.4124	6.525	0.1553	Atp6v1g2
-0.4859	9.116	0.1553	Camk2a
-0.4194	9.812	0.1553	Prkcb
0.7093	6.21	0.1553	Erbin
1.281	2.167	0.157	B230206L02Rik
0.8448	4.563	0.157	Rassf8
1.074	3.941	0.157	Clic4
-1.755	4.278	0.157	1700016P03Rik
-1.185	2.695	0.157	ENSMUSG00000120498
-0.4406	5.525	0.157	Col4a2
-1.452	5.464	0.1571	Galnt9
1.773	2.92	0.1571	Adgrv1
-0.6034	6.873	0.1631	Arid5b
-1.047	3.222	0.1644	Dtwd2
-0.743	5.48	0.1644	Fmnl1
-0.5317	6.825	0.1644	Atf6
0.5003	6.367	0.1712	Rbms1
0.4856	7.508	0.1715	Immp2l
0.4869	4.667	0.1715	Glb1
-2.217	1.509	0.1715	Ntn5
0.9338	3.064	0.1715	Txnl4a
0.4283	6.436	0.1715	St8sia3
-0.4327	6.143	0.1715	Zfhx2
-0.637	8.722	0.1718	D430041D05Rik
-1.577	4.253	0.1718	Rpph1
1.129	5.184	0.1718	Tcf7l2
-1.901	1.699	0.1718	Far2os2
-0.4967	7.717	0.1748	Syt16
0.9631	3.328	0.1764	Hhat
-0.4116	6.812	0.1764	Zfp532
0.6491	3.522	0.1765	Zfp574
-0.5847	9.448	0.1776	Slit3
1.139	5.295	0.1776	Mpp7
-0.4643	8.11	0.1776	Dlg1
-1.042	2.669	0.1781	Pcdhga5
0.7328	3.44	0.1781	Serp1
0.9439	2.695	0.1806	Iqub
1.151	2.577	0.1806	Klhl33
1.529	3.726	0.1806	Sugct
-1.017	8.713	0.1806	Sorcs3
0.7789	4.425	0.1806	Rxrg
-0.3941	7.467	0.1806	Man1a2
-0.5029	8.194	0.1806	Ptk2
0.5373	5.977	0.1806	Atg10
-0.5934	6	0.1806	Mtmr12
-0.387	6.946	0.1806	Cacng2
0.6658	4.046	0.1806	Nfxl1
0.4015	5.944	0.1806	Hnrnpdl
-0.511	5.996	0.1806	Speg
0.5741	5.073	0.1814	Fam20b
-0.5947	8.065	0.1814	Khdrbs3
-0.5244	5.16	0.1814	Ccsap
0.9871	4.917	0.1814	C1qa
1.097	4.96	0.1814	Nek7
0.6087	3.978	0.1814	Rps25
1.001	6.817	0.1814	Fhit
-0.5776	5.1	0.1814	Ephx4
-1.591	5.561	0.1814	Igfn1
-0.6053	11.09	0.1814	Tenm2
1.621	1.598	0.1814	Tnfsf13b
1.22	1.858	0.1814	Prr18
0.7193	3.813	0.1814	Mmut
-0.5132	7.61	0.1814	Zmynd8
-1.431	2.865	0.1814	Sertm1
2.243	5.493	0.1814	Mobp
-0.6153	4.906	0.1814	Noct
0.5919	6.172	0.1814	Grb10
-0.4452	5.317	0.1814	Hyou1
-0.559	4.668	0.1814	Ubald1
-0.7691	3.949	0.1814	Morc2b
-1.091	4.967	0.1814	Phf21b
0.4637	4.796	0.1814	Gosr1
-0.7016	7.91	0.1814	Cntn3
-0.8139	3.726	0.1818	Spred3
0.9114	3.465	0.1842	Kcnh2
1.35	2.194	0.1842	Amigo2
-0.831	3.332	0.186	Gm37728
-0.8975	5.554	0.1866	Cck
0.7899	4.263	0.1912	Adgrg1
-0.7684	5.104	0.1912	Rims4
0.8484	3.507	0.1912	Echs1
-0.4044	6.007	0.1912	Neurl1a
-0.7349	7.231	0.1914	Gfod1
1.123	3.645	0.1914	mt-Nd6
2.765	1.576	0.1914	Gm20752
0.6819	3.892	0.192	Tex9
-1.114	2.311	0.1927	Tmc4
1.308	2.191	0.1927	9530051G07Rik
-0.4181	9.423	0.1937	Sorbs2
-0.5254	5.725	0.1937	Nt5dc3
1.306	8.022	0.1949	Luzp2
-0.9292	2.851	0.1949	Pvr
-0.7874	7.091	0.1949	Mlip
-0.5035	7.835	0.1949	Cobl
-0.4141	4.988	0.1949	Cpt1c
0.5877	3.51	0.1953	Pgp
0.9478	1.921	0.1962	Rtl8a
-0.3776	10.73	0.1963	Anks1b
0.7839	3.085	0.197	Mtrf1l
-0.6029	9.381	0.1988	Slc24a2
-0.7395	5.224	0.2049	Per2
-0.3937	5.806	0.2049	Zbtb7a
-0.4615	7.707	0.2049	Cdh11
-0.5157	4.325	0.2049	Prkag1
-0.343	7.227	0.2063	Septin11
-0.7248	6.288	0.2063	Cabp1
0.672	3.904	0.2063	Ampd2
-0.5467	5.451	0.2063	Pxdn
-1.084	1.866	0.2063	Cetn4
-1.182	1.83	0.2063	Gm29282
-0.717	3.409	0.2063	Efcab5
0.4488	6.469	0.2063	Actg1
0.8886	2.575	0.2063	4632415L05Rik
1.791	2.089	0.2081	Phldb2
1.256	1.808	0.2081	Gpr165
-0.6337	5.718	0.2083	Zfp831
-0.6298	4.388	0.2083	Mettl7a1
-0.7123	9.036	0.2083	Tafa2
-0.9698	5.827	0.2083	Synj2
1.944	1.926	0.2083	Ppp1r3c
-0.5784	6.45	0.2083	Mast3
1.814	4.019	0.2083	Aldh1a1
-0.9486	5.53	0.2083	Marchf11
-0.5094	4.718	0.2083	Adam11
0.4477	4.936	0.2083	Npc1
-0.8961	3.237	0.2083	Dapk3
-0.4224	10.61	0.2083	Dab1
-0.4675	9.155	0.2083	Tcf4
0.57	3.394	0.2083	Cox14
-1.285	5.834	0.2083	Itga8
0.4147	5.104	0.2083	Prdx2
-0.3333	8.28	0.2083	Msra
0.4718	6.184	0.2083	Eif5
-0.3719	6.603	0.2083	Hp1bp3
0.6437	3.875	0.2083	Gm43439
0.5714	3.577	0.2083	Zfp467
-0.6557	7.866	0.2083	Sez6l
0.4422	4.821	0.2083	Cops4
1.001	2.002	0.2083	Adgrf2
0.5595	5.238	0.2083	Stat5b
0.8635	3.686	0.2083	Arsg
-0.6699	3.438	0.2083	Man2c1os
0.7091	4.613	0.2083	Usp6nl
0.9401	2.709	0.2083	Trim30a
1.451	2.409	0.2084	Cd59a
-0.6931	6.836	0.2086	Lrrk2
-0.5613	5.035	0.2104	Col4a1
-0.6695	5.156	0.2104	Per1
-0.3905	10.6	0.2104	Kalrn
-0.5095	10.17	0.2104	Grin2a
-0.8608	6.463	0.2104	Egr1
1.067	1.537	0.2104	Dhrs13
-0.548	5.533	0.2118	Cdh22
-0.4967	8.495	0.212	Bsn
0.855	2.793	0.212	Arhgap4
-0.7725	4.619	0.2141	Gm10125
0.3737	5.985	0.2148	Usp11
2.626	1.733	0.215	Dgkk
-1.783	4.914	0.2161	Nr4a3
-0.3332	7.082	0.2161	Dlg4
-0.4734	11.81	0.2163	Csmd1
-0.6027	3.941	0.2164	Stk35
-1.024	2.204	0.2164	Gm2762
0.4979	4.729	0.2164	Wdfy1
-0.5942	7.273	0.2175	Adcy1
-0.7378	6.193	0.2175	Nrp1
0.5198	4.272	0.2175	Eef1b2
0.6692	4.294	0.2175	Phyh
0.394	5.692	0.2182	Sppl2a
-0.5985	7.492	0.2211	Tmem108
1.206	2.328	0.2236	Tmem268
-0.6444	7.059	0.2236	Ankrd33b
1.297	3.322	0.2236	A830019P07Rik
-0.3656	6.836	0.2236	Pcnx2
0.6039	5.532	0.2237	Tbc1d9b
0.6673	3.295	0.2237	Prps2
0.4518	4.367	0.2237	BC031181
0.6193	4.222	0.2237	Hadhb
1.311	3.386	0.2237	Anxa3
-1.425	2.972	0.2237	Mas1
1.009	6.963	0.2237	Tmcc3
-0.5821	4.381	0.2237	Ints7
0.6216	5.133	0.2237	Qser1
-1.047	3.519	0.2237	Decr2
0.9149	2.372	0.2237	Smpdl3a
-0.61	3.882	0.2237	A430033K04Rik
-2.485	2.332	0.2243	ENSMUSG00000121318
-0.3507	7.72	0.2252	Gpatch8
0.7019	3.354	0.2252	Mfsd1
-0.5346	5.598	0.2252	Cdyl2
0.4365	5.948	0.2252	Lamp1
-0.4761	6.549	0.2252	Iqsec3
-0.4531	7.909	0.2252	Shank1
1.22	2.242	0.2252	Cox7b2
-1.032	3.105	0.2252	Tatdn3
-0.5277	6.056	0.2252	Mamld1
-0.3351	5.934	0.2252	Ccdc6
-0.6056	7.606	0.2252	Lingo1
1.222	6.303	0.2252	Penk
-0.4706	6.787	0.2252	Sestd1
-2.289	1.447	0.2252	Eqtn
1.545	1.992	0.2252	Lgals3bp
-0.4516	5.452	0.2252	St8sia1
0.8171	3.376	0.2252	Idh2
-1.204	5.804	0.2252	Nectin1
-0.4784	4.404	0.2256	1600020E01Rik
0.4735	4.164	0.2256	E430024I08Rik
-0.4988	4.196	0.2256	Sdhaf2
0.4656	4.653	0.2256	Stard9
-1.221	6.391	0.2256	ENSMUSG00000095041
-0.3149	9.333	0.2256	Atxn1
0.7744	3.364	0.2256	Lhpp
-0.7967	4.913	0.2271	Chst8
-0.4161	8.076	0.2271	Mmp16
0.5868	3.455	0.2271	Pdzd11
-0.389	7	0.2271	Klhl3
0.9581	3.9	0.2271	Ifitm10
-0.9009	2.982	0.2271	Cys1
2.074	2.956	0.2271	Zic1
0.9627	1.952	0.2271	Gm37621
-0.5217	7.588	0.2271	Cx3cl1
0.8028	2.501	0.2271	Zfp931
-1.24	2.503	0.2271	Gm6225
1.033	2.284	0.2271	Fgf2
0.7197	2.966	0.2271	Mrpl17
0.9639	4.318	0.2271	Tbxas1
-0.5614	4.953	0.2284	Arhgap33
-0.4591	6.508	0.2284	Pip5k1c
-0.7958	7.432	0.2284	Nwd2
0.727	3.207	0.2284	Kdelr2
-0.4835	8.047	0.2284	Apba2
-1.912	2.68	0.2284	Clec18a
-0.4763	4.454	0.2284	Irak1bp1
0.9379	3.55	0.23	Crot
-0.4015	5.623	0.2316	Castor2
0.4338	4.514	0.2322	Rragc
-0.3797	5.519	0.2322	Ythdc2
1.326	2.8	0.2325	Lrrc9
-0.3519	7.614	0.2325	Trerf1
-0.5907	5.091	0.2325	Gpr22
0.709	4.093	0.2325	Sccpdh
0.4173	6.078	0.2325	Tmem106b
0.8418	2.647	0.2325	Slc26a2
0.8505	5.945	0.2325	Peli2
-0.8362	3.11	0.2334	Med8
1.187	2.25	0.2335	Gm1715
-0.3147	6.398	0.2338	Mapk14
-0.4466	7.558	0.2344	Rasgrf2
-0.3863	7.497	0.2344	2210408F21Rik
-0.3278	6.476	0.2344	Actn4
0.5437	5.556	0.2344	Fat1
0.3332	6.067	0.2344	Rab5a
-0.5773	4.375	0.2344	Gm44559
-0.6351	8.103	0.2344	Edil3
-0.8771	5.091	0.2344	Tcerg1l
0.6395	3.075	0.2344	Surf1
-0.4967	9.315	0.2344	Rgs7
0.5445	3.191	0.2365	Rnf181
-0.473	7.248	0.2365	Srcin1
-0.6522	4.546	0.2365	Zfp961
0.501	7.522	0.2365	Fhod3
-0.4342	4.332	0.2365	Cox7a2l
0.8391	6.493	0.2365	Gm33228
0.7461	3.246	0.2365	Abcb8
-0.346	6.679	0.2365	Fbxl16
0.4549	4.234	0.2365	Elob
-1.003	5.621	0.2365	Ntng2
-0.4361	8.869	0.2365	Cacna1a
-0.3521	7.152	0.2365	Arih1
0.3815	4.854	0.2365	Ran
-0.5088	4.104	0.2365	Ppp1r15b
-0.7227	3.689	0.2365	Spag1
-0.4109	7.07	0.2365	Ftx
-0.3725	8.004	0.2365	Rapgef2
-0.3939	8.036	0.2365	Khdrbs2
-0.4294	7.368	0.2365	Pknox2
0.6856	4.581	0.2365	Fgfr1
-0.3925	6.097	0.2365	Cry2
0.4609	4.465	0.2387	Slc25a17
1.769	1.606	0.2413	Tram2
-1.355	1.918	0.2427	Oacyl
0.5557	4.304	0.2427	Zkscan2
-0.7296	3.816	0.2427	Pot1b
-0.9167	2.449	0.2427	E130008D07Rik
-0.4258	8.857	0.2431	Enox1
-0.864	4.044	0.2444	Crispld1
0.5315	4.14	0.2487	Dele1
0.7909	2.583	0.2487	Pigo
0.3446	5.562	0.2495	Hibadh
0.7443	3.419	0.2504	Vat1
-0.4617	8.747	0.2509	Gm19951
0.764	3.533	0.2509	Coa5
0.4542	4.156	0.252	Alg11
0.8608	2.497	0.2521	Gm51425
-2.393	3.037	0.2538	Ccnb1ip1
-0.3807	7.204	0.2539	Gabra1
0.427	4.776	0.254	Mzt1
-0.3493	7.286	0.2542	Ttll11
-0.4425	5.652	0.2544	Gm42669
0.4785	4.12	0.2553	Cep135
-0.4058	6.723	0.2555	Slc44a1
-0.8568	6.975	0.2556	Sgsm1
0.7304	2.658	0.2579	Dck
-0.6403	6.339	0.2583	Igsf21
0.6901	4.817	0.2598	Prxl2a
-0.4038	6.71	0.2598	Elapor1
0.486	5.662	0.2601	Sil1
0.3786	5.368	0.2615	Smad2
0.7892	2.395	0.2618	Med22
-0.3292	6.373	0.2625	Mtf2
-1.245	2.392	0.2625	E130304I02Rik
-0.3225	5.825	0.2625	Tecpr2
-0.952	2.189	0.2638	Iqcc
0.9986	1.99	0.265	Triobp
0.5461	3.355	0.267	Atic
0.4602	4.249	0.267	Akap1
0.7605	2.666	0.267	6430584L05Rik
-0.3522	9.662	0.267	Cacna1e
0.4435	5.118	0.267	Micos10
-0.3294	8.021	0.267	Kmt2a
0.6838	2.682	0.267	Mtrr
1.285	1.679	0.267	Gck
-0.5565	6.574	0.267	Runx2
0.4648	5.401	0.267	Stxbp4
-0.8751	3.255	0.2671	Gm44899
0.4562	5.19	0.2671	Bex3
-0.5637	6.653	0.2671	Igsf9b
-1.006	2.646	0.2671	Chrd
0.5553	3.904	0.2671	Ehd4
-0.8046	3.441	0.2671	Pcdh8
-0.9765	2.393	0.2671	Srp54a
-0.4494	5.898	0.2708	Cpne6
-0.4112	5.087	0.2708	Zc3h18
0.7903	2.666	0.2724	Zbbx
0.5514	4.196	0.2724	Plekha3
1.269	2.365	0.2724	Rhoh
-0.3426	8.733	0.2724	Cyfip2
-0.3972	9.08	0.2725	Ppfia2
0.9627	2.222	0.2725	Poglut3
-1.33	1.761	0.2725	C230034O21Rik
0.5173	4.229	0.2725	Slc25a33
-0.7095	3.835	0.2727	Rbm3
2.513	1.476	0.2727	Odad2
-0.8999	3.783	0.2727	Rps3a1
0.6813	5.64	0.273	ENSMUSG00000121395
-0.5931	4.876	0.2739	B3glct
-0.4419	7.426	0.2741	Sptbn2
0.7461	3.787	0.2741	Lipa
-1.236	1.948	0.2741	Ccdc13
-0.4477	6.177	0.2744	Med14
1.31	2.956	0.2744	Cd83
1.004	3.292	0.2753	Ttyh2
-0.7881	2.963	0.2753	Dusp12
0.9907	3.208	0.2763	Creb5
-0.3635	5.624	0.2763	Socs7
-0.3792	8.194	0.2763	Zdhhc14
-0.3884	7.037	0.2773	Nin
-0.6216	5.231	0.2784	Irs2
-0.4838	6.459	0.2791	Nxpe4
-0.4239	7.744	0.2791	Syt7
0.4166	4.872	0.2814	Pcx
-0.3177	8.442	0.2816	Mbnl2
0.7454	3.409	0.2825	Rhbdd1
1.574	2.446	0.2825	Slc25a18
1.381	3.124	0.2825	Adamts9
1.071	2.438	0.2825	Cyb561a3
-0.8408	3.171	0.2825	Klf10
-0.3994	8.163	0.2825	Rock2
1.444	1.696	0.2839	Slc2a12
0.3862	4.904	0.2839	Zfp512
-0.6581	6.594	0.2839	Sh3rf1
-0.5767	11.8	0.2839	Camk1d
-1.289	2.881	0.2839	Smim43
-0.5467	3.537	0.2842	Unc45a
0.4001	5.251	0.2842	Fyco1
0.3486	6.808	0.2842	Pcca
-1.196	5.976	0.2842	Gm49678
0.7177	3.25	0.2842	Oat
-0.4255	8.632	0.2842	Dscaml1
-0.4572	7.743	0.2842	Bcl11a
-0.3468	7.282	0.2842	Baiap2
0.3544	6.107	0.2842	Ldhb
0.7167	3.505	0.2842	Mid1ip1
-0.4903	4.984	0.2842	Cers1
0.5981	3.553	0.2842	Prelid3b
0.7087	7.824	0.2842	Rbms3
-0.6288	3.495	0.2842	Rell2
0.5822	4.428	0.2842	Atp5j2
-0.3863	4.624	0.2842	Zfp131
0.3865	5.02	0.2842	Ap3s2
-0.3126	7.083	0.2842	Dcaf6
0.2913	9.413	0.2842	Macf1
0.4065	4.839	0.2842	Cul4b
-0.2926	7.023	0.2842	Cdk13
-0.3309	7.432	0.2842	Adcy9
0.4554	4.234	0.2854	Sgcb
1.068	2.037	0.2854	Orai1
1.223	1.764	0.2854	Snx8
0.681	3.379	0.286	Ppil6
0.5793	6.564	0.286	Gab2
-0.719	3.318	0.2865	Wdr66
-0.5791	8.209	0.2865	Cplx2
-0.3825	5.176	0.2865	Numbl
1.409	2.076	0.2865	Nlrp1b
0.9217	3.818	0.2874	Elk3
0.6888	4.387	0.2892	4930488L21Rik
-0.4833	6	0.2898	Vgll4
0.4041	5.129	0.2898	Wls
-0.5711	9.238	0.2907	Tnr
-0.3552	5.648	0.2915	Kifbp
1.128	2.681	0.2919	Iqck
-0.3017	8.454	0.2919	Scn8a
0.7588	2.342	0.2919	Ech1
1.032	4.514	0.2919	Sfmbt2
-0.3146	9.26	0.2919	Lncpint
-0.8008	3.452	0.2919	Mapk11
0.6725	5.614	0.2919	Gm10649
-0.8078	4.597	0.2919	Otof
0.449	4.746	0.2919	Mccc2
-0.5725	3.495	0.2919	B130055M24Rik
-0.5359	5.483	0.2919	Tbc1d1
-0.5615	5.816	0.2919	Agpat4
-0.686	2.653	0.2919	Fcsk
0.6014	2.773	0.2919	Nudt11
0.5509	3.829	0.2919	L2hgdh
0.5883	3.913	0.2919	Optn
-0.3634	8.823	0.2919	Trim9
-0.4217	7.406	0.2919	Arnt2
-0.398	6.816	0.2919	Dmtn
-0.4009	5.986	0.2919	Nuak1
0.396	5.429	0.2919	Nudc
-0.5489	3.139	0.2919	Dlk2
0.4654	5.161	0.2929	Oprm1
1.11	2.736	0.2929	Mro
-1.27	2.381	0.2929	Igfbp4
-2.133	1.965	0.2929	Cbln4
1.108	2.054	0.2929	Fhdc1
-0.9826	2.626	0.2929	Gm21984
-0.6724	3.3	0.2929	Wee1
0.8796	2.719	0.2929	Mtap
0.555	2.889	0.2929	Litaf
-2.138	2.919	0.2929	Gm31816
0.3863	6.586	0.2929	Fmn1
-1.051	1.761	0.2929	9230112J17Rik
0.9446	2.925	0.2929	4930432B10Rik
0.8045	3.373	0.2929	4932441J04Rik
0.7331	2.629	0.2929	Mmab
-0.5353	5.133	0.2929	ENSMUSG00000121141
-1.29	2.671	0.2929	Lamc2
0.7169	2.857	0.2929	Acadvl
-0.3807	6.73	0.2929	Irf2
0.4908	4.781	0.2929	6030443J06Rik
-0.2891	7.524	0.2929	Zfand3
0.398	5.303	0.2929	Trim23
-0.3846	5.811	0.2929	Spata5
-0.4655	8.013	0.2929	Cmip
-0.3769	9.448	0.2929	Ntrk3
0.7703	2.133	0.2929	Rhbdd3
-0.6467	3.055	0.2929	Otub2
-0.4759	6.657	0.2929	Rps6ka2
-0.3796	7.239	0.2929	Kcnip3
-0.8255	3.114	0.2929	Mettl17
0.8463	1.756	0.2929	Neil1
-0.4658	5.94	0.2933	Usp25
0.3099	5.822	0.2933	Ubxn7
-0.4375	8.032	0.2933	Gramd1b
-0.3219	5.943	0.2933	Gm10419
-0.4129	4.522	0.2933	Gm38020
-0.4815	8.247	0.2955	Shank2
-0.8555	2.398	0.2964	Gm42439
0.7918	5.763	0.2969	Sash1
0.8236	2.044	0.2969	Mad2l1
-0.6091	7.848	0.2969	Efna5
-0.3879	5.335	0.2969	Cttn
0.5786	3.735	0.2974	Trim26
-0.2869	7.732	0.2974	Tsc22d1
-0.3995	8.717	0.2975	Csmd2
0.7598	2.471	0.2975	Mapk7
-0.8583	2.653	0.2975	0610040F04Rik
0.8089	2.344	0.2975	Tep1
0.9518	5.002	0.2975	Zfp423
-0.3	6.528	0.2975	Hnrnpul2
0.5974	3.88	0.2975	Mif
-0.8491	3.631	0.2975	Rtn4rl2
-0.696	2.993	0.2975	Gm48099
-0.3705	7.725	0.2975	Add2
-0.5094	4.681	0.2975	Tent4a
-0.5212	5.313	0.2975	Cdk5r2
0.5413	3.654	0.2975	Acvr2b
-0.4761	8.219	0.2975	Fam135b
-1.547	1.605	0.2975	Muc3a
-0.5122	9.097	0.2975	R3hdm1
0.9625	2.447	0.2975	Fcgr2b
0.6457	3.776	0.2975	Polr3h
-0.3133	7.68	0.2975	Dlgap4
1.083	1.702	0.2975	Tmem41a
0.4516	6.611	0.2975	Syndig1
-0.4204	5.449	0.2975	Tmem260
1.153	1.622	0.2975	Mboat1
0.3554	5.255	0.2975	Selenof
1.02	2.177	0.2983	Evi2
-0.6513	7.173	0.2983	Kctd1
0.5553	3.737	0.2983	Get1
-0.4307	4.471	0.2983	Flrt1
-0.398	7.756	0.2983	R3hdm2
0.6662	3.023	0.2983	Pgd
0.4288	4.215	0.2984	Commd8
0.5344	6.685	0.2989	Sv2c
-0.2934	8.573	0.3004	Atp8a1
-0.2725	9.815	0.3004	Prkce
0.952	2.165	0.301	4933404O12Rik
0.2998	6.34	0.301	Hnrnpl
-0.5239	4.54	0.301	Pdia4
-0.3643	5.831	0.301	Fbrsl1
-0.8496	3.497	0.301	Adamts10
1.365	1.908	0.301	Nqo2
0.3466	4.688	0.301	Coq2
0.789	2.985	0.301	Dse
0.3678	5.58	0.301	Fggy
2.788	1.492	0.301	Prrx1
0.3698	6.329	0.301	Enpp5
0.7087	2.666	0.3013	Casp3
1.314	2.454	0.3013	Kcnj16
1.62	4.091	0.3013	Synpo2
-0.5178	4.248	0.3013	Msrb3
0.7532	3.223	0.3013	Bend7
-0.3734	6.24	0.3013	Btbd10
0.6926	2.414	0.3013	Cad
-0.6975	2.569	0.3013	Gm16894
0.5628	3.782	0.3013	Ubl5
0.3958	3.841	0.3013	Zfp955a
-0.5635	4.144	0.3013	Dipk2a
-0.2527	6.803	0.3013	Hycc2
-0.5689	8.642	0.3013	Sv2b
-0.2707	6.822	0.3017	Vps41
-0.3656	6.657	0.3019	Sel1l
0.9464	4.91	0.3019	Btbd11
0.3143	5.158	0.3019	Rpn2
0.6242	6.437	0.3019	Ghr
0.5069	3.271	0.3021	Nifk
-0.2903	7.275	0.3021	Pgbd5
0.4168	5.069	0.3021	Tpgs2
0.9748	2.059	0.3021	Lgals9
0.4956	4.356	0.3021	Slc44a2
0.5489	3.524	0.3021	Cfap46
-0.4055	6.408	0.3021	Cnnm1
-0.373	5.39	0.3021	Exd2
1.154	1.634	0.3021	Eml3
0.5399	3.116	0.3021	Rsl24d1
0.5781	3.274	0.3021	Smim19
0.6103	3.495	0.3021	Yap1
-0.4863	6.558	0.3021	Efr3a
1.141	2.91	0.3021	Ctso
0.4959	7.89	0.3021	Wwox
-0.2934	6.27	0.3021	Mbtd1
1.057	2.148	0.3021	Pygm
1.049	3.504	0.3021	Cd63
0.4229	4.411	0.3021	Ssh1
0.4515	4.962	0.3021	Dpysl3
-0.3265	6.693	0.3021	Mef2d
1.89	3.115	0.3023	A330033J07Rik
-0.6941	4.451	0.3025	Trp53i11
-0.346	7.49	0.3031	Arhgap21
-0.5336	6.72	0.3031	Rnf165
-1.127	4.475	0.3031	Rspo2
0.552	4.022	0.3054	Svip
-0.4178	4.743	0.3055	Klhl15
-0.5801	11.95	0.3055	Ptprd
0.5954	2.683	0.3055	Tmem123
0.7335	3.137	0.3055	Selenon
-0.5053	3.938	0.3065	Cnep1r1
0.3681	6.227	0.3065	Tpi1
-0.29	7.364	0.3065	Thra
-0.3183	8.737	0.3065	Strbp
-0.3503	7.921	0.3065	Sobp
0.855	2.274	0.3065	Arxes2
-1.61	6.885	0.3073	Il1rapl2
1.481	2.533	0.3073	A830008E24Rik
-0.3722	8.337	0.3076	Sh3gl2
-0.5443	4.21	0.3076	Sowaha
-0.5201	3.945	0.3076	Mnt
-0.2905	7.472	0.3076	Ncdn
0.6597	3.759	0.3084	Map3k20
-1.067	3.801	0.3084	Baz1a
0.3716	4.3	0.3084	Ndufv3
0.8689	2.016	0.3084	Pon2
0.5276	3.604	0.3084	Rnf7
-0.263	6.333	0.3088	Agap3
0.3831	5.023	0.3088	Txnrd1
0.379	4.592	0.3093	Zfp788
-1.067	2.028	0.3099	Epop
1.04	3.433	0.3099	Wdfy4
-0.2719	7.898	0.3099	Synj1
0.3468	7.363	0.3099	Focad
-1.123	9.99	0.31	Tafa1
0.4583	3.731	0.31	Gart
-0.47	4.799	0.3105	Prkg2
0.769	3.892	0.3105	Nadk2
0.8854	2.869	0.3105	Zfp395
-0.5349	6.838	0.3105	Tet3
0.4749	4.723	0.3105	Rgmb
-0.8634	2.923	0.3105	Acaa1a
-0.3406	5.012	0.3105	Timm9
0.5415	3.024	0.3105	Caprin2
0.4125	3.724	0.3105	Rdh10
-0.7063	6.28	0.3105	Syt13
-0.5718	2.978	0.3105	Ccdc28b
0.4516	4.734	0.3105	Plpp1
0.6349	2.348	0.3105	Spr
0.6368	3.928	0.3105	Epb41l5
1.024	1.642	0.3105	Catsper3
-0.634	6.003	0.3105	Cds1
0.6222	2.672	0.3105	1110059G10Rik
-1.024	2.317	0.3105	Ltk
1.696	3.719	0.3105	Slc15a2
0.907	2.261	0.3105	Hells
-1.168	1.905	0.3105	Gm11973
1.292	1.891	0.3105	Gm49342
-0.4444	7.993	0.3105	Olfm1
-0.5803	4.456	0.3108	Pom121
0.3244	4.657	0.3108	Sar1b
0.4339	4.334	0.3108	Msh2
0.8958	4.981	0.3108	Slc17a6
-0.7145	3.413	0.3109	Gm11767
1.304	2.85	0.3109	AW551984
0.517	4.205	0.3111	Pcyt1a
-0.542	6.726	0.3111	Smad3
-0.3525	4.424	0.3111	Lpcat4
1.2	3.931	0.3111	Gsap
0.4064	4.229	0.3112	Rpl7
0.8774	5.178	0.3112	Ndn
1.184	2.052	0.3112	Tlr3
0.4168	4.34	0.3112	Nckap5l
0.44	6.457	0.3112	Ivns1abp
0.5899	2.954	0.3112	Micos13
0.3995	3.767	0.3112	Hspa14
-0.4101	5.785	0.3112	Lamc1
0.8764	2.187	0.3112	Mrpl36
1.16	5.51	0.3112	Abca1
0.5404	4.128	0.3112	Edem1
1.472	1.487	0.3112	Trim12a
-1.34	2.117	0.3112	Ccdc61
-0.4857	5.382	0.3112	Kcnc3
0.6972	2.818	0.3112	Lca5l
-0.3403	7.54	0.3112	Wasf1
-0.4897	7.791	0.3112	Cdh10
0.8026	1.716	0.3112	Nipsnap3b
-0.5187	5.849	0.3112	Nectin3
0.8772	2.317	0.3112	Cthrc1
0.3643	6.305	0.3117	Usp46
0.498	3.414	0.3117	Haghl
-0.3805	10.6	0.3117	Grm7
-0.3603	7.074	0.3125	Slc16a7
-0.432	5.17	0.3137	3110082I17Rik
-0.5356	3.896	0.3137	Rbm24
-0.9136	4.279	0.3137	Dnah9
0.6705	2.877	0.3137	4921504A21Rik
-0.6318	3.77	0.3137	Atf4
-0.2931	7.436	0.3137	Ncor2
0.7588	2.518	0.3137	Sh2b2
0.6951	2.734	0.3141	Mrpl14
-1.672	4.315	0.3141	Nr4a2
0.6445	5.458	0.3141	Il6st
-0.4601	4.638	0.3141	Ttpal
0.8165	2.764	0.3141	Gpr153
-0.3007	7.981	0.3141	Ablim1
1.241	5.037	0.3141	Drd2
-0.7897	3.87	0.3141	Tdg
-0.7655	2.496	0.3141	Mrpl27
0.3182	5.349	0.3141	Ctbp1
0.8315	5.741	0.3146	Nckap5
-0.3657	4.646	0.3146	Tbc1d22b
0.5749	5.824	0.3146	Cd81
-0.4308	4.288	0.3146	A630036G19Rik
0.4776	5.776	0.3146	Fam102b
-0.4637	6.442	0.3154	Pip5k1b
0.566	5.416	0.3154	Vcl
1.166	2.235	0.3154	Dbndd1
-1.344	1.627	0.3155	5330416C01Rik
0.4541	4.057	0.3161	Gbe1
0.2762	5.728	0.3164	Hif1a
0.5421	3.963	0.3164	Tprgl
-0.4486	3.759	0.3164	Pank4
-0.336	7.589	0.317	Rasgef1a
-0.4347	5.244	0.317	Ppp1r37
0.7308	5.165	0.317	Arhgap22
-0.4429	10.51	0.317	Dlgap2
-1.056	2.464	0.317	ENSMUSG00000120396
-0.3105	10.16	0.317	Arpp21
0.5409	4.185	0.3179	Minar2
-0.6695	7.421	0.318	Lrfn2
-0.6603	7.939	0.318	Hcn1
0.8584	2.945	0.318	Abcb1b
0.4797	3.942	0.318	Hbp1
1.266	2.448	0.318	2610307P16Rik
0.3238	4.634	0.318	Wdtc1
0.8894	4.266	0.318	Jam2
-0.6868	4.717	0.318	Myo5b
-0.3113	7.871	0.318	Plxna2
-0.7094	4.333	0.318	Syt12
0.3153	5.496	0.318	Galnt1
-0.3477	7.135	0.318	Dlgap3
1.854	1.672	0.3205	Plekho2
-0.2547	8.631	0.3217	Nedd4l
-0.3553	5.795	0.3224	Kif17
-0.27	6.002	0.3224	Sf1
1.143	2.248	0.3224	Rnd2
0.3221	4.948	0.3224	Gas6
0.5637	2.543	0.3224	Trappc2l
-0.4004	5.115	0.3224	Gm12940
0.4929	3.167	0.3224	Vps72
0.4256	6.673	0.3224	Fchsd2
0.3966	4.474	0.3224	Rpl18a
-1.15	4.484	0.3224	Fosl2
1.659	4.339	0.3224	Kcnj10
-0.4107	6.522	0.3225	Slc1a1
-0.2921	7.094	0.3225	Herc3
0.6756	6.78	0.3227	Abat
0.4353	3.967	0.3231	Nphp1
1.091	1.897	0.3236	Tspan15
0.7982	2.387	0.325	Zfp58
-0.2436	9.009	0.325	Nptn
-0.7633	3.383	0.325	Armcx3
-1.255	2.341	0.325	AU023762
-0.4113	6.33	0.3252	Srebf2
-0.271	5.688	0.3259	Smc1a
0.4383	4.681	0.3259	Gk
0.6296	3.612	0.3262	Idh1
1.362	4.426	0.3266	Kcnh8
0.9198	5.299	0.3266	Bmp2k
-1.313	5.355	0.3266	Bdnf
0.2772	5.307	0.3271	Atp5h
-0.3195	4.853	0.3296	Pou6f1
0.5342	3.655	0.3296	Chmp1b
-0.3867	4.295	0.3296	Zfp281
-0.4698	5.689	0.3302	Mmp17
-0.3613	5.872	0.3309	Cacnb1
1.179	1.86	0.3314	Rest
-0.3477	9.468	0.3328	Hivep2
-1.146	2.568	0.3328	Neu2
-0.5695	8.829	0.3328	Chrm3
-0.2998	8.685	0.3328	Setbp1
-0.3166	5.997	0.3328	Crtc1
0.4163	3.481	0.3328	Ehbp1l1
0.4401	4.37	0.3328	Prdx1
0.7252	3.563	0.3328	Elf1
0.522	3.296	0.3328	Psmb3
1.543	4.377	0.3328	Pla2g7
1.254	3.294	0.3328	Slc38a3
-0.5786	7.856	0.3344	Ptprk
0.486	5.364	0.3344	Agpat5
0.7739	2.5	0.3344	Apeh
0.5396	3.999	0.3344	Rab27a
-0.7383	3.814	0.3344	Kctd4
0.3462	5.65	0.3344	Washc2
0.6633	3.522	0.3344	Atp6ap1l
0.5889	5.133	0.3344	Irs1
-0.3231	6.182	0.3344	Arntl
0.4667	3.749	0.3344	Nme2
0.409	5.009	0.3344	Dpysl5
-0.3712	6.355	0.3344	Fbxo34
0.7037	3.095	0.3344	Washc1
-0.2496	7.407	0.3344	Vps13a
0.6011	4.588	0.3344	Agl
-0.4805	5.594	0.3344	Dot1l
0.7361	2.744	0.3344	Fbxo30
-0.2834	6.05	0.3344	Rev1
2.142	3.77	0.3344	Calb2
1.01	8.338	0.3344	Zfp804b
0.6661	3.017	0.3344	Repin1
-0.3263	10.62	0.3344	Grin2b
-0.4222	6.121	0.3347	Synpo
-0.2786	7.074	0.3356	Ppp3cb
-0.4313	6.378	0.3356	Bicdl1
-0.2713	8.603	0.3356	Cdk14
0.4372	4.985	0.3356	Capns1
-0.3084	9.778	0.3356	Gria2
-0.2934	5.959	0.3357	Fbxw4
-0.9512	2.629	0.3357	Creld2
-0.3913	5.204	0.3357	Pip4k2c
-0.9047	5.835	0.336	Sema3a
-1.049	1.792	0.3365	Tmem69
1.473	2.416	0.3365	Inppl1
-0.3085	7.504	0.3365	Ank
0.4634	4.462	0.3365	Paics
0.4037	3.938	0.3365	Ndufc1
-1.205	5.796	0.3365	Pcsk1
0.382	4.043	0.3365	Twf1
0.296	6.033	0.3365	Hspd1
0.6787	2.827	0.3365	Tstd3
-0.9281	2.895	0.3365	Mri1
-0.7788	3.632	0.3365	Tmem198
1.594	3.757	0.3365	Arhgef26
-0.425	4.34	0.3365	Abhd15
-0.8296	2.737	0.3365	Mamdc2
-0.3665	6.375	0.3365	Zfp365
-0.3907	7.419	0.3371	Spred1
0.3438	5.488	0.3371	Rnf145
0.41	5.567	0.3371	Strip2
1.708	2.899	0.3371	Gstm1
-0.7756	2.722	0.3371	Gm47715
0.3006	5.204	0.3371	Mrfap1
0.7635	4.917	0.3371	Mtss2
-0.4378	4.651	0.3371	Fstl1
-0.3519	5.55	0.3371	Ubp1
-0.6101	3.932	0.3371	Gm14532
1.175	2.332	0.3371	Pate2
0.4744	4.216	0.3371	N4bp2
0.426	3.86	0.3371	Gm5577
0.459	4.076	0.3371	Fem1c
-0.3816	6.673	0.338	Kdm7a
0.4102	4.331	0.3382	Ssbp4
-0.3104	5.178	0.3382	Usp19
-0.2511	6.973	0.3382	Sbno1
0.4883	3.182	0.3382	Pnpo
0.5846	3.807	0.3389	Pla2g15
-0.9503	2.281	0.3389	Ror2
0.6907	2.513	0.3389	ENSMUSG00000121485
0.3643	4.505	0.3389	Dcakd
-1.02	1.84	0.3397	Gm9954
-0.5738	4.436	0.3403	Arl5b
-0.286	8.249	0.3403	Tmem132b
0.6348	6.633	0.3403	Ttc28
-1.436	4.623	0.3403	St18
0.776	3.625	0.3403	Osbpl5
-0.3542	6.205	0.3403	Cbx6
-0.7536	3.468	0.3403	Gm28578
0.4728	4.711	0.3403	Map1lc3a
-0.6951	2.291	0.3403	Thap1
-0.2507	7.155	0.3403	Ambra1
-1.737	2.307	0.3404	Gpr161
0.5552	2.591	0.3404	Zbtb14
0.237	6.33	0.3404	Pou2f1
-0.3507	6.265	0.3404	Dagla
0.4874	8.902	0.3404	Mgat4c
-0.6926	3.914	0.3404	Kcnj11
-0.3531	7.827	0.3404	Apba1
1.121	2.231	0.3404	A330093E20Rik
1.329	1.753	0.3404	C3ar1
1.179	1.814	0.3404	Prdm9
-0.5218	3.941	0.3404	Dpysl4
0.4238	7.37	0.3404	Fth1
-0.3594	5.376	0.3404	Diaph1
0.2698	5.866	0.3404	Atad1
0.3973	4.563	0.3404	Dusp22
0.6282	4.261	0.3404	Disc1
-0.2793	8.567	0.3404	Stxbp5l
-1.605	3.287	0.3404	Mag
-0.437	7.319	0.3404	Dgkg
-0.2692	6.415	0.3404	Chchd6
0.2727	5.5	0.3404	Ppm1k
-0.4106	5.177	0.3404	Tcte2
-0.3514	9.005	0.3404	Gria3
0.6228	4.219	0.3404	Afap1
-0.3232	4.745	0.3404	Senp3
-1.041	3.415	0.3404	9630014M24Rik
-0.2863	4.821	0.3404	Smarcb1
0.2986	7.083	0.3404	Itm2c
-1.331	1.494	0.3404	A830009L08Rik
0.5595	3.847	0.3404	Zfp386
0.4738	4.688	0.3404	Lrrc1
0.3923	4.959	0.3404	Sfxn1
-0.368	7.878	0.3404	Kcnj6
-0.6141	4.736	0.3404	Bhlhe40
1.805	1.726	0.3404	Il1a
-0.2755	6.726	0.3404	Smg7
0.3677	3.729	0.3404	1810030O07Rik
-0.5215	3.421	0.3404	Nbn
0.6237	4.664	0.3404	Sncaip
-0.3232	7.662	0.3404	Pitpnm2
0.4031	6.182	0.3404	Ubb
0.9031	1.833	0.3404	4930590J08Rik
0.5794	4.357	0.3404	Wars2
0.6798	3.256	0.3404	Gm20687
0.9713	5.116	0.3408	Sema3c
-0.3448	6.063	0.3408	Chrm1
0.5065	4.354	0.3408	Dram2
-0.742	7.553	0.3408	Atp2b4
-0.5296	3.986	0.3408	Gm43517
-0.3439	4.353	0.3408	Ap1m1
0.4156	4.725	0.3408	Ano10
-0.3503	5.27	0.341	Dusp8
-0.2881	4.823	0.341	Fbxl19
-0.3071	5.524	0.3413	Cstf2
-0.2953	5.049	0.3413	Bri3bp
-0.5379	9.35	0.3413	Car10
-0.2802	8.578	0.3413	Tspan5
0.5475	2.742	0.3414	Zfp442
0.5536	4.131	0.3416	Zfand4
0.3074	5.074	0.3416	Zfp277
0.4211	4.623	0.3416	ENSMUSG00000121307
0.2696	5.05	0.3416	Tsg101
-0.3146	7.665	0.3416	Trank1
1.555	3.134	0.3416	Gcnt1
-0.4249	7.623	0.3416	Epha4
-0.3474	6.003	0.3416	Fam78b
-0.406	4.66	0.3416	Rbm10
-0.3414	7.36	0.3416	Kcnq2
-0.4395	6.852	0.3416	B230209E15Rik
-0.4227	6.797	0.3416	Sez6l2
-1.233	4.979	0.3416	Arc
-0.3322	8.896	0.3416	Sipa1l1
-1.15	2.953	0.3423	Plk5
0.3995	5.214	0.3423	Clcn6
-0.3499	6.612	0.3423	Unc13b
0.505	4.426	0.3423	E230016M11Rik
-0.4465	5.402	0.3423	Tmem151a
0.3549	4.619	0.3423	Tmem241
-0.4301	4.436	0.3423	Cep89
-0.6489	2.169	0.3423	2900009J06Rik
0.672	4.321	0.3423	Slc22a15
0.2943	5.782	0.3423	Atp6ap1
0.6877	3.709	0.3423	Gm2a
1.575	5.254	0.3423	Aldoc
-0.4964	3.624	0.3424	Zbtb17
-1.394	2.05	0.3434	Col5a1
0.4686	3.626	0.3434	Csk
-0.4546	5.322	0.3447	Mn1
-0.2571	8.176	0.345	Gls
-0.2628	8.933	0.345	Dip2c
-0.6213	9.066	0.345	Unc5d
-0.5012	4.595	0.346	Paqr9
0.5236	5.838	0.346	Rnf180
-0.2328	5.894	0.3469	Wbp2
-0.4909	4.169	0.3469	Mapk6
-0.2985	7.226	0.3481	Celf5
-0.2306	6.677	0.3486	Prrc2a
1.089	6.473	0.3486	Kcnip1
0.3915	4.988	0.3486	Ugp2
-0.3489	5.504	0.3486	Prdm10
0.5137	3.612	0.3486	Hectd3
0.3412	4.886	0.3486	Ngly1
-0.3141	6.826	0.3486	Golm2
1.02	6.385	0.3486	Selenop
-0.4755	7.545	0.3486	Prkag2
-0.3363	5.375	0.3486	Patj
1.203	1.779	0.3486	Olig2
-0.5417	3.518	0.3486	Pdgfa
-0.5349	3.222	0.3494	Rabl2
1.109	3.815	0.3496	P2ry13
0.77	3.714	0.3498	Rnf213
0.3164	4.865	0.3501	Msmo1
-0.3782	5.996	0.3512	A830082K12Rik
-0.3444	6.034	0.3512	Dbn1
-0.2672	6.389	0.3527	B3gat1
-0.4743	8.246	0.3527	Frmd5
0.6919	2.357	0.3527	Unc5b
0.5958	2.769	0.3527	Atox1
-0.2291	8.41	0.3527	Aak1
0.4552	5.263	0.3527	Arhgap42
-0.3544	7.055	0.3527	Gsg1l
0.7036	3.666	0.3527	Gstm5
-0.3427	8.787	0.3527	Gabbr2
-0.3416	7.038	0.3536	Myrip
1.222	4.379	0.3547	Fyb
0.4037	6.859	0.355	Camk2g
-0.5843	4.953	0.3555	Camkk1
-0.4033	5.69	0.3557	Inka2
0.3185	5.917	0.3557	Lamp2
1.147	2.787	0.3557	Sox2
0.6581	3.503	0.3557	Ubtd1
-0.337	4.752	0.3557	Mpc2
0.4365	6.553	0.3557	Lrch1
-0.6626	3.133	0.3557	Hectd2os
-0.306	8.527	0.3557	Rgs7bp
-0.4063	4.417	0.3557	Klhdc1
-0.3105	5.844	0.3557	Ercc6
0.8919	4.063	0.3557	Psd2
-0.3791	4.087	0.3557	Spag6l
-0.3414	7.948	0.3557	Ptk2b
0.2865	5.467	0.3557	Lars
-0.4667	4.423	0.3557	Arhgef25
-0.8048	6.262	0.3557	Mpped1
0.3428	4.176	0.3557	Gatad2a
0.7321	4.91	0.3557	Fads1
-0.2927	7.193	0.3557	Susd4
-0.3715	7.682	0.3557	Nrgn
-0.7412	2.676	0.3557	Zfp235
0.6287	3.2	0.3557	Idua
0.5693	4.324	0.3557	Slc16a6
-0.7662	2.284	0.3557	Gm38642 - ENSMUSG00000111219
-0.3211	6.787	0.3557	Prmt8
-0.2902	7.09	0.3557	Dennd5b
-0.2891	5.441	0.3557	Kcnj9
-0.4461	7.518	0.3557	Me3
0.3785	4.123	0.3557	Dennd10
-0.4388	4.284	0.3557	Zfp738
0.2748	6.989	0.3557	Ghitm
0.3897	3.964	0.3557	Acadm
0.3079	6.286	0.3557	Snx12
0.2871	7.865	0.3557	Aplp2
0.7406	7.718	0.3557	Kif5a
-0.4956	6.424	0.3557	Rnf217
1.026	2.325	0.3557	Plaat3
-0.566	3.524	0.3557	Exosc9
-1.282	2.499	0.3558	4933430M04Rik
-0.3842	6.337	0.3559	Ndfip2
0.317	4.77	0.3559	Wsb1
-0.4229	7.376	0.3559	Rap1gap2
-0.3548	5.578	0.3559	Srrt
-0.5812	2.953	0.356	Zkscan6
0.5816	2.427	0.356	Rsph14
-0.4582	6.167	0.356	Plxnc1
-1.35	1.452	0.356	Gm32200
-0.8953	2.047	0.356	Abca17
1.352	3.213	0.356	Ezr
-0.3754	4.203	0.356	Cnpy3
0.6833	6.039	0.356	Gm26691
-0.3175	6.217	0.356	Shank3
-0.3832	4.435	0.356	Kdm6b
0.7846	2.896	0.3563	Naaa
-0.3343	9.153	0.3563	Mef2c
-1.645	1.754	0.3563	Gask1b
0.9883	2.246	0.3563	Gdf11
-0.4242	4.665	0.3563	Cyp51
0.5026	3.467	0.3563	Gng10
0.3249	5.325	0.3563	Abcd3
-0.3152	5.784	0.3563	Banp
0.371	4.873	0.3563	Map1lc3b
-0.542	4.272	0.3563	Gm10033
-0.343	5.749	0.3563	Eipr1
-0.3661	7.417	0.3563	Unc13a
-0.5529	5.673	0.3563	Ccdc88c
0.236	6.498	0.3564	Ctnnb1
-0.5263	8.415	0.3564	Pam
0.5166	3.798	0.3564	Hrh3
1.369	6.258	0.3564	Cntnap4
-0.3204	12.17	0.3571	Celf2
1.487	3.846	0.3571	Prlr
0.5734	3.133	0.3571	Pdcl
-0.8106	5.891	0.3571	St8sia5
0.4398	6.906	0.3572	Chst11
1.131	1.881	0.3577	Eln
0.3162	4.267	0.3577	Nt5m
-0.3229	5.01	0.3577	Ppp1r12c
0.6131	5.192	0.358	Wasf2
1.529	1.694	0.358	Chrdl1
1.293	2.941	0.358	Ctsc
-1.958	1.146	0.358	1700030F04Rik
-0.4184	7.933	0.358	Ppm1h
0.7203	2.23	0.3586	Vasp
-0.3875	4.229	0.3598	Entpd7
-0.573	3.061	0.3598	Rpl29
0.2553	6.825	0.3604	Vwa8
-0.6951	3.824	0.3604	Gm54867
0.6765	2.684	0.3604	Sema4g
0.5483	4.211	0.3604	Cald1
-0.3573	6.606	0.3604	D630045J12Rik
-0.624	3.024	0.3604	Gm17484
-0.2738	6.416	0.361	Shc3
-0.2606	8.39	0.361	Iqsec1
0.7773	3.067	0.361	Gm2885
-0.2515	5.515	0.361	Paxbp1
0.4566	4.02	0.361	Rpl23a
0.7301	5.875	0.3611	Glud1
1.381	6.528	0.3611	Apoe
0.9872	3.524	0.3611	Glis1
0.2673	5.543	0.3611	Vdac2
-0.2234	6.47	0.3611	Ppig
1.442	2.311	0.3611	Mt2
0.9336	7.55	0.3611	Ptprm
-0.4122	6.776	0.3611	Adgrb2
0.3793	3.869	0.3611	Ankrd16
0.2876	5.715	0.3611	Selenot
0.3534	4.341	0.3611	Ermp1
-0.4425	4.085	0.3611	Cfap300
-0.417	4.121	0.3611	Pxylp1
0.6394	3.822	0.3611	Smox
0.7344	2.553	0.3611	Zfp783 - ENSMUSG00000072653
-0.336	4.767	0.3615	Zfp329
0.4506	3.501	0.3615	Scrt1
-0.2235	7.964	0.3615	Ankrd11
1.067	1.85	0.3624	4930581F22Rik
-0.5024	3.184	0.3627	Sgf29
0.9915	1.686	0.3627	Acaa2
0.4387	4.884	0.3629	Klf8
1.511	2.854	0.363	Mlc1
-0.8016	2.389	0.3634	Cav2
0.5588	7.062	0.3634	Pcp4
1.024	2.772	0.3647	Ace
0.998	2.011	0.3647	Tmsb15l
0.6936	2.533	0.3647	Slc25a39
-0.6221	8.244	0.3651	Pdzrn3
0.6975	3.851	0.3651	Gm45341
-0.2414	5.716	0.3651	Otud4
-0.6832	2.246	0.3653	Zfp408
0.796	2.155	0.3653	Anapc13
1.228	3.796	0.3653	Hepacam
-0.3531	5.361	0.3653	Dnajc21
0.3484	4.98	0.3653	Smyd2
-0.4777	4.233	0.3653	ENSMUSG00000120976
0.5596	3	0.3653	Commd6
-0.2805	6.952	0.3659	Slc8a2
0.7076	3.169	0.3659	Gm1604b
0.3003	7.225	0.3659	Itsn1
0.6695	2.147	0.3659	Magohb
-0.3722	6.546	0.3659	Pkig
-0.7856	2.224	0.3659	Acrbp
-1.51	3.119	0.3676	Stac
1.102	2.037	0.3676	Dera
-0.3305	5.179	0.3676	B4galt5
-0.3116	5.456	0.3681	Jade2
-0.7096	2.009	0.3681	Gm9947
0.4013	5.442	0.3683	6330403K07Rik
0.5496	4.095	0.3683	Scp2
-0.5377	7.798	0.3683	Ak5
0.3784	5.183	0.3684	Podxl2
-0.3943	4.274	0.3687	Raver1
-0.2501	5.938	0.3687	Fgfr1op2
-0.4893	5.565	0.3687	Dnajb5
0.3741	5.458	0.3687	Dpy19l4
0.3134	5.224	0.3687	Snn
0.9561	3.281	0.3687	Elovl2
-0.2572	7.357	0.3687	Atp9b
0.4762	3.208	0.3687	Cd276
-0.3202	5.643	0.3687	Cyp46a1
-0.3413	6.131	0.3687	Strn4
0.5323	3.296	0.3687	Dhrs1
0.7007	3.582	0.3687	Ankrd29
0.5316	3.2	0.3687	Slc35f6
0.5442	4.761	0.3687	Rhobtb3
-0.3362	4.033	0.3687	Pum3
-0.4599	9.853	0.3687	Cdh12
-0.2873	4.867	0.3687	Tsn
0.6311	2.605	0.3697	Anapc15
-0.2473	8.475	0.3697	Rasgrf1
0.321	4.685	0.3697	Zbtb37
-0.4881	2.896	0.3697	Zfp629
0.5638	2.965	0.3697	Zfp687
-0.5242	5.415	0.3697	C230057M02Rik
-0.6941	6.301	0.3702	Ust
-0.2389	7.063	0.3705	Lmo7
0.5896	4.655	0.3711	Cd164
0.6307	2.671	0.3711	Glmp
0.3042	6.942	0.3711	Eno2
-0.3487	10.69	0.3711	Lingo2
-0.2512	7.176	0.3711	Chd2
-0.3283	8.03	0.3711	Cap2
0.2987	4.521	0.3711	Stub1
-0.4526	4.199	0.3711	Gp1bb
-0.5569	4.121	0.3711	Sh3pxd2b
0.6344	2.835	0.3711	Tunar
-0.7716	2.884	0.3713	Zfp839
-0.5589	5.425	0.3713	Bcor
0.3664	3.922	0.3713	Qdpr
-0.3436	4.727	0.3713	Dnmt1
0.3654	4.859	0.3713	Swi5
-0.2433	5.717	0.3714	Foxk2
0.8091	2.38	0.3714	Grin2d
-0.2849	5.899	0.3714	Stx6
-0.4168	6.167	0.3714	Slc16a2
0.438	3.826	0.3717	Patz1
1.122	2.581	0.3717	Sall3
-0.4301	3.975	0.3721	Erf
-0.3488	4.776	0.3721	Ptpn23
0.5348	4.675	0.3721	Ftl1
-0.3994	7.894	0.3721	Adgrb1
1.125	6.687	0.3724	Glul
0.6881	4.792	0.3725	Tspan9
-0.5242	4.462	0.3725	Trim66
-0.435	6.043	0.3725	Tanc1
1.315	3.501	0.3735	Myo1f
-0.3928	4.754	0.3746	Matk
-0.5817	3.537	0.3749	Teddm2
-0.316	4.911	0.3754	Brd9
0.4961	4.643	0.3754	Aldh5a1
-0.4371	3.336	0.3754	Ciao1
0.4967	4.817	0.3754	2610316D01Rik
-0.9775	5.025	0.3754	Disp3
1.657	5.113	0.3754	Gja1
-0.6389	3.629	0.3756	0610043K17Rik
-0.5032	3.605	0.3756	Wdr73
0.6089	2.714	0.376	Cib2
-0.3292	7.141	0.3762	Pcdha10
-0.2244	6.924	0.3764	Gigyf2
0.2979	5.349	0.3768	Suclg1
-0.2574	7.736	0.3769	Aopep
-0.2756	6.386	0.3769	8030462N17Rik
1.125	1.448	0.3769	BC035044
-0.855	4.527	0.3769	Dusp6
-0.3258	8.33	0.3769	Rab6b
-0.5	3.188	0.3769	Rcc1l
-0.4374	6.341	0.3769	Hivep1
-0.539	3.88	0.3769	Malt1
-0.3626	5.524	0.3776	Faah
0.4106	4.235	0.3776	Laptm4b
0.9323	2.969	0.3776	Lap3
1.002	1.964	0.3778	Tlr4
0.4622	3.299	0.3778	Taf9b
0.8529	6.749	0.378	Ptprz1
-0.2932	4.957	0.3784	Slc38a6
-0.2584	7.668	0.3788	Crebbp
0.3243	4.116	0.3788	Rer1
0.2912	5.102	0.3788	Fbxo10
0.3802	5.568	0.3788	Rdx
-0.2567	6.467	0.3788	Akap8l
-0.2855	5.455	0.3788	Kifc2
-0.473	5.622	0.3788	Rras2
-0.68	3.092	0.3788	Rps6kb2
-0.5556	8.229	0.3788	Pdzd2
-0.3623	9.507	0.3788	Atp2b2
-0.4897	3.306	0.3788	Lysmd3
-0.2937	7.384	0.3788	Tacc1
0.4941	3.385	0.3788	Lmnb1
0.5238	4.739	0.3795	Tbc1d16
-0.216	7.169	0.3802	Psme4
0.5953	3.095	0.3803	Ganc
-0.3001	4.781	0.3803	Nup35
-0.2237	8.525	0.3815	Unc79
0.6504	7.875	0.3821	Inpp4b
0.3289	4.978	0.3838	Mrpl1
0.6176	4.212	0.3838	Abhd3
-0.2863	5.545	0.3839	Iqgap1
0.5878	2.819	0.3839	Rfx5
-0.3546	7.829	0.3841	Cracdl
-0.7444	2.422	0.3843	Hkdc1
-0.8547	2.337	0.3847	Dmc1
-0.4446	4.424	0.3851	Arl4a
1.135	1.515	0.3851	Inafm1
0.3031	4.389	0.3851	Tmed5
0.5044	3.814	0.3851	Zfp758
0.3395	4.958	0.3851	Hmgn3
-0.3308	5.023	0.3851	Rtn4r
0.3497	4.033	0.3851	Slc30a1
-0.49	3.361	0.3851	Mettl3
0.8325	4.091	0.3851	Cacng5
-0.2399	7.949	0.3851	Pak3
-0.2793	9.403	0.3851	Mapk10
-0.3199	5.736	0.3851	Lrrc4
0.2504	4.905	0.3878	Rbx1
0.8473	9.657	0.3889	Galntl6
0.5084	3.565	0.3889	Zbtb49
0.5265	2.799	0.3889	Pomt1
0.7236	5.888	0.3889	Pard3b
-1.016	2.85	0.3889	Gm15997
-0.3785	4.361	0.3889	Klhl12
-0.2739	5.669	0.3889	Abhd6
0.2963	5.39	0.3889	Dynlt3
0.5384	2.862	0.3889	Oprl1
0.2496	6.676	0.3895	Copg2
-0.4061	8.581	0.3896	Ncald
-0.7579	2.274	0.3896	Lig4
-0.6958	3.294	0.3896	Btg3
0.277	4.655	0.3896	Bscl2
1.058	1.668	0.3896	Susd2
0.2822	9.579	0.3899	Nav2
-0.3055	4.765	0.3899	Zdhhc1
1.141	2.997	0.3899	Bin2
-0.8268	1.957	0.3899	Gm17231
0.7366	7.001	0.3899	Hs3st5
0.9248	2.414	0.3899	Fgd3
-0.8958	1.765	0.3899	Gm12367
-0.3613	5.275	0.3899	Cramp1
0.2651	4.962	0.3899	Ankmy2
-0.2152	9.779	0.3906	Nbea
0.4039	3.274	0.3908	Fbxo36
-0.3055	8.448	0.3908	Cttnbp2
1.26	1.716	0.3913	Pcdh18
-0.342	7.614	0.3913	Sh3rf3
-0.5525	2.453	0.3913	Nabp1
0.8393	3.782	0.3913	Pik3ap1
-0.4124	4.971	0.3913	Acsl5
-0.33	5.258	0.3913	Cxadr
0.4709	3.338	0.3913	Adsl
-0.5054	3.928	0.3913	Ak4
-0.6152	6.497	0.3913	Sidt1
-0.4058	5.05	0.3913	Gramd4
0.6858	4.248	0.3913	Mme
0.492	3.79	0.3913	Aldh2
-0.2322	5.866	0.3913	Ubxn4
0.5754	2.209	0.3913	Slc35b2
0.2403	7.361	0.3913	Wnk1
0.3589	6.999	0.3913	Fnbp1
-0.2729	6.537	0.3913	Pdss2
1.415	2.494	0.3913	Hck
0.3968	3.243	0.3913	9630010A21Rik
0.6037	4.676	0.3915	Mt3
-0.7246	2.288	0.3915	2810455O05Rik
0.885	2.352	0.3915	Pcdhgb4
0.8455	2.626	0.3923	H2bc4
0.3068	4.814	0.3923	Eif4e2
-0.4763	4.965	0.3923	Rnps1
1.085	2.28	0.3923	Cldn10
0.6217	3.774	0.3923	Crlf3
-0.3325	5.212	0.3923	Cpped1
-0.299	7.318	0.3923	Sptbn4
0.3882	4.927	0.3923	Epm2a
-0.2015	7.097	0.3923	Brd4
0.3051	4.427	0.3923	Zc3h3
-0.7748	2.986	0.3924	Abca7
-0.2652	6.325	0.3924	Flnb
0.5741	2.468	0.3924	Mmgt2
0.5406	4.461	0.3924	Yes1
1.266	1.8	0.3929	4930447N08Rik
0.4868	5.378	0.3929	Plekha7
-0.4126	3.765	0.3929	Zfp646
0.4075	3.611	0.3929	Prrc1
-0.3515	4.262	0.3929	Gm48091
0.7594	2.267	0.3929	Pcdhb20
0.736	5.867	0.3929	Cables1
-0.2813	5.642	0.3929	Supt5
-0.5293	3.122	0.3929	Tctn3
0.523	3.269	0.3929	Haus6
0.4834	4.051	0.3929	Adamts16
0.6308	2.927	0.3929	Naga
-0.6151	2.536	0.393	Ercc1
0.3362	5.143	0.393	Amy1
-0.4356	5.038	0.393	Exph5
0.219	7.757	0.393	Bltp1
0.7433	2.505	0.3931	Ppih
2.051	2.39	0.3931	Vipr2
0.4216	4.352	0.3931	Slitrk2
0.2936	5.555	0.3931	Crppa
-0.7808	2.959	0.3931	Htr5a
-0.3786	9.512	0.3937	Prkg1
-0.44	4.167	0.3937	Pdlim7
0.4053	4.249	0.3942	Nubpl
0.6871	2.475	0.3944	Masp1
-0.2427	7.276	0.3949	Elavl3
0.454	3.383	0.3949	Spcs1
-0.4405	6.048	0.3958	Creg2
-0.2708	5.814	0.396	Fbxo41
-0.3421	4.856	0.396	Trim46
-0.3627	7.68	0.396	Ptprn
0.2569	5.067	0.396	Rnf103
-0.6156	2.892	0.3964	Ten1
0.4354	4.502	0.3965	Hunk
0.3227	4.875	0.397	Cuedc1
0.3883	5.236	0.397	Rab21
0.3043	6.29	0.397	Tspan3
0.5765	3.497	0.397	Ssbp1
-0.7277	2.677	0.3971	Calhm2
0.4614	3.957	0.3977	Btf3l4
0.2269	6.039	0.3977	Pafah1b2
0.3001	4.693	0.398	2010315B03Rik
-0.6833	1.754	0.3986	Gm19531
0.7001	4.552	0.3986	Rgs10
0.6875	2.806	0.3986	Lipe
-0.2889	6.906	0.3987	Adcy8
-0.3373	4.762	0.3987	Spns2
-0.7467	3.335	0.3993	Dnah5
1.468	2.023	0.3993	Axl
0.2678	5.133	0.3993	Cept1
0.3174	6.182	0.3993	Bltp2
0.3463	3.84	0.3995	Fuca2
-0.7488	2.548	0.3995	4930578M01Rik
-0.3401	6.532	0.4001	Stim2
0.6531	1.935	0.4001	Gm12359
-0.2619	5.947	0.4001	Tpd52
0.6998	2.125	0.4001	Slc14a2
0.2616	5.52	0.4014	Vps35l
0.6033	3.403	0.4014	Pomgnt2
-0.219	7.037	0.4014	Mark2
-0.6571	6.641	0.4014	Frmd6
0.4347	4.767	0.4014	Pgm1
-0.2092	7.475	0.4014	Rbm25
-0.3139	6.191	0.4014	Nsun2
-0.4256	4.479	0.4014	Gmeb2
1.214	1.587	0.4014	Gm20708
0.5662	2.443	0.4014	Pih1d1
0.8308	6.155	0.4014	Kctd8
-0.3969	3.869	0.4014	Gm17494
-0.303	4.904	0.4014	Snapc1
0.3544	4.73	0.4014	Bbs7
-0.4322	3.415	0.4014	Zfp958
0.2472	5.047	0.4014	Hadha
-0.3424	5.338	0.4014	Arih2
0.3758	5.012	0.4014	Cpne9
-0.3154	6.933	0.4029	Arhgap39
-1.43	3.125	0.4029	Apod
-0.2694	5.688	0.4029	Fmr1
0.6728	3.415	0.4037	F8
-0.8241	2.465	0.4041	Wdhd1
0.5701	2.657	0.4041	Nr6a1os
0.6054	5.233	0.4048	Grk5
0.8986	3.197	0.4048	Ankrd55
-0.8732	4.887	0.4048	Anxa11
-0.3566	4.98	0.4048	Heca
0.2785	5.651	0.4048	Cep290
0.3956	4.447	0.4048	Dctn3
0.7117	4.923	0.4048	Gm45846
0.268	5.203	0.4048	Ppp1r14c
-0.3877	6.933	0.4055	Dgkz
-1.153	3.526	0.4055	Mei1
-0.2492	5.79	0.4055	Senp5
-0.2396	5.37	0.406	Atg16l1
0.338	3.47	0.406	Timm29
1.169	2.376	0.4062	Casp8
0.4154	3.425	0.4062	Sdr39u1
-0.2055	7.647	0.4062	Etnk1
-0.5182	7.904	0.4062	Mapk4
-0.3483	4.566	0.4062	Slc35d1
-0.6822	2.776	0.4065	Inha
0.5792	2.231	0.4067	Cln5
0.232	5.964	0.4067	Stx7
-0.75	2.483	0.4067	Panct2
0.3702	4.589	0.4067	Ap5m1
-0.2148	5.914	0.4067	Gm40841
-0.4779	6.605	0.4067	Raph1
-0.2634	5.937	0.4067	Rsrc2
-0.6419	2.854	0.4067	A230056P14Rik
0.4601	2.922	0.4067	Rab26
-0.1982	6.842	0.4067	Gatad2b
0.2992	4.881	0.4068	Vac14
1.032	2.314	0.4072	Vcam1
-0.2994	8.827	0.4076	Ube2e2
-0.5676	4.736	0.4076	Rasal1
-0.2044	6.573	0.4076	Fnip1
-0.8688	5.617	0.4076	Syt17
-0.3492	5.375	0.4076	Pdxdc1
0.2617	5.153	0.4076	Dld
-0.4567	4.768	0.4076	Kcnj4
-0.2232	7.15	0.4076	Btrc
1.144	3.665	0.4076	Megf10
-0.2409	7.533	0.4076	Oip5os1
-0.6331	3.704	0.4089	Lrfn1
-0.4839	8.391	0.4089	Grm1
-0.2868	5.543	0.4089	Dusp3
0.4222	3.764	0.4089	Pnrc2
0.3308	4.624	0.409	Stx17
-0.3885	6.07	0.409	Tyro3
0.7442	7.28	0.4097	Zfhx3
0.9738	3.307	0.4098	Vwa5a
0.5608	3.241	0.4098	Lacc1
-0.2241	9.13	0.4098	Cdr1os
-2.046	1.252	0.4098	Grp
0.4758	4.426	0.4098	Rplp1
0.6754	3.119	0.4101	Wnt7b
-0.4833	3.283	0.4101	Mrpl38
0.6806	2.1	0.4102	ENSMUSG00000121226
-0.4342	5.545	0.4108	Stx1a
-0.2264	6.02	0.4108	Trpc1
0.3722	3.989	0.4108	Mapkapk5
-0.2463	7.811	0.4111	Acap2
-0.3294	5.25	0.4114	2900026A02Rik
0.5666	2.929	0.4115	1810037I17Rik
0.566	3.655	0.4115	Aldh4a1
0.4812	6.142	0.4118	Prune2
-0.2418	10.14	0.4119	Lrrc7
0.4436	3.687	0.4119	Bpgm
0.2945	5.891	0.4121	Selenow
-0.3611	9.812	0.4124	Rims1
-0.5015	5.556	0.4125	Ar
1.007	2.203	0.4128	Cdc42ep4
0.7999	2.535	0.4128	Prss23
0.6394	2.154	0.4128	Gm31152
-0.7474	5.088	0.4132	Fat4
-0.3158	9.861	0.4139	Ralyl
-0.2475	6.343	0.4139	Map9
-0.3467	6.391	0.4139	Tub
0.3482	4.541	0.4142	Hpcal1
-0.6576	2.846	0.4173	Poc1a
0.2282	5.832	0.4174	Rala
-0.223	6.322	0.4174	Dnaja1
-0.6551	2.456	0.4174	Ercc2
0.3794	4.649	0.4174	Me2
-0.383	3.79	0.4175	Epo
0.7871	2.144	0.4175	Plscr4
0.6274	6.976	0.4176	Pbx3
0.5783	3.09	0.4176	Tubb2b
-0.4058	4.334	0.4176	Med26
1.251	3.101	0.4176	Cd53
0.3625	4.055	0.4176	Ndufa8
0.355	6.683	0.4176	Add3
0.3891	6.364	0.4176	Phactr2
0.8941	3.764	0.4176	Dbi
0.5586	2.227	0.4176	Cdr2
0.2474	5.79	0.4176	Rnf214
-0.6091	2.019	0.4176	Gtf2h4
-0.3569	3.85	0.4176	Panx2
0.3384	7.001	0.4176	Pcdh10
0.2729	5.657	0.4176	Pnma8a
0.2919	5.072	0.4176	Rps8
0.3207	6.873	0.4176	Gm38666
1.175	2.736	0.4176	Rbpms
0.385	6.763	0.418	Gucy1b1
0.8118	1.693	0.418	Fpgs
0.3728	4.071	0.418	Ccdc85c
-0.3475	4.646	0.4183	Ttc9
0.4278	5.178	0.4183	Ypel5
-0.5824	3.926	0.4183	Gm20063
0.3408	4.508	0.4183	Tmem50b
0.7211	3.718	0.4183	Lpl
0.5115	6.873	0.4183	Kif5b
0.2722	4.269	0.4183	Psmd8
0.499	3.676	0.4183	Anapc11
-0.8437	2.044	0.4191	Saxo2
0.4163	3.535	0.4193	Pbx2
0.4262	3.722	0.4193	Ptcd1
-0.3426	4.413	0.4193	Sytl2
-0.2612	6.584	0.4193	Mir124a-1hg
0.9198	2.744	0.4193	Palld
-0.459	3.291	0.4193	Stox1
1.392	3.406	0.4193	Tril
-0.3266	4.876	0.4193	Zfp326
0.7013	5.653	0.4193	Chd7
1.148	1.638	0.4193	Tmem144
-0.4177	5.194	0.4194	Tnks1bp1
-0.3964	4.797	0.4194	Aifm3
0.266	5.824	0.4208	Acbd5
0.4768	2.539	0.4216	Acyp1
0.4282	3.537	0.4216	Pgam5
-0.2521	5.934	0.4216	Slc2a3
0.3499	4.37	0.4216	Rps7
-0.4261	9.143	0.4216	Egfem1
-0.2881	6.804	0.4225	Klf9
0.2557	6.555	0.4225	Rsrc1
0.2738	5.464	0.4227	Fam91a1
0.4178	5.284	0.4231	Slc6a15
0.2723	4.366	0.4231	Ints4
0.2705	5	0.4231	Iars2
0.456	3.665	0.4241	Xpc
0.3207	4.422	0.4241	Arl2bp
0.3849	3.605	0.4241	Limd2
0.5396	5.49	0.4241	Pygb
-0.4772	3.008	0.4241	0610030E20Rik
0.3579	4.449	0.4241	Fau
-0.2667	6.83	0.4241	Smarca4
0.3749	3.708	0.4241	Rplp0
0.3195	3.534	0.4241	Ormdl3
-0.7878	2.222	0.4241	Nalf2
1.457	3.865	0.4241	Mfge8
0.8942	1.463	0.4241	Zfp217
0.5562	3.622	0.4241	Cirbp
-0.4478	3.398	0.4241	Rnf166
-0.7396	2.561	0.4241	Aars2
0.6649	2.155	0.4241	Det1
-0.3164	6.081	0.4241	Klf13
-0.3646	3.301	0.4241	Oxa1l
0.5854	3.956	0.4242	Aldh6a1
-0.547	6.328	0.4246	2610035D17Rik
0.6097	3.028	0.4251	Rgs3
0.6039	2.903	0.4251	Tmem230
0.722	2.112	0.4251	Rtp4
0.3432	6.713	0.4251	Osbpl9
0.2487	5.6	0.4251	Rpgr
-0.5221	8.136	0.4252	Tmem132d
0.3759	4.431	0.4254	Nfatc3
-0.2625	6.019	0.4259	Lclat1
0.2722	5.477	0.4263	Heatr5b
-0.2676	5.202	0.4264	Cfap69
0.3007	5.061	0.4266	4833439L19Rik
0.3066	5.218	0.4266	Gcnt2
0.6358	5.244	0.4266	Adra1a
0.4554	3.722	0.4267	Rfk
-0.3175	4.407	0.4267	Ramac
0.4695	3.737	0.4267	Hsdl1
-0.3338	6.942	0.4274	Miat
0.2761	4.686	0.4274	Rab22a
-0.3365	4.391	0.4274	Hnrnpa0
-0.6143	2.106	0.4274	6330403L08Rik
0.6561	2.442	0.4274	T2
-0.2917	7.394	0.4274	Rps6ka3
-0.6913	4.874	0.4274	Efcab6
0.6028	3.227	0.4274	Rdh5
0.6587	2.172	0.4274	Alas2
-0.9575	2.131	0.4274	Acer2
0.5328	2.528	0.4274	Saysd1
0.4483	4.113	0.4274	Arl14ep
-0.2538	9.384	0.4278	Rbfox3
0.7983	2.497	0.4278	Tor3a
0.3254	3.64	0.4278	Rab4b
-0.3504	5.335	0.4278	Slc39a11
0.6075	4.228	0.4287	Shb
-0.6475	2.477	0.4287	Wrap53
-0.2933	4.903	0.429	Trappc13
1.314	6.288	0.429	Slc1a3
-0.2756	5.656	0.429	Sun1
-0.2067	6.793	0.429	Acin1
-0.37	6.74	0.429	Prkcg
-0.2511	10.31	0.429	Grm5
0.2441	6.293	0.429	Extl3
0.3568	4.765	0.429	Cdk5rap2
0.8883	4.185	0.4294	Lair1
-0.4417	4.758	0.4294	Xbp1
0.4875	3.145	0.4294	Ndufb11
-0.2308	6.687	0.4296	Arhgef7
0.661	3.475	0.43	Asah2
-0.4742	3.418	0.43	Siah2
-0.3141	6.407	0.43	Nrn1
0.5022	3.081	0.43	Gm28403
0.8433	3.789	0.43	Suclg2
-0.3854	5.525	0.4303	Rilpl1
-0.2066	7.694	0.4304	Arf3
1.159	3.759	0.4315	Plcg2
0.4908	3.194	0.4319	Arfrp1
-0.5783	2.213	0.4319	C230013L11Rik
1.282	1.767	0.4319	Prelp
-0.3281	6.637	0.4319	Pdcd4
0.4686	3.27	0.4319	Scly
0.2944	4.491	0.4319	Sdhc
-0.2679	4.763	0.4319	Polr1a
-0.3002	7.794	0.4319	Mical3
-0.3441	7.655	0.4319	Nmnat2
-0.3137	5.148	0.4319	Ptpn2
0.4678	5.939	0.4321	Hap1
0.8425	1.867	0.4323	Lpar6
0.7808	2.905	0.4326	Gzmk
-0.5764	4.489	0.4326	Tamalin
-0.7298	4.894	0.4328	Gm3294
0.5516	2.668	0.4328	Glis2
-0.2594	6.569	0.4328	Gm1043
0.4881	4.863	0.433	Nacc2
0.2543	5.439	0.433	Srbd1
0.2715	5.422	0.4336	Stard7
0.2427	5.993	0.4343	Cnbp
0.524	3.731	0.4349	Rp2
-0.4702	3.234	0.4349	Ldlr
1.213	4.306	0.4349	S1pr1
0.2956	5.084	0.4349	Ssr3
0.3682	3.625	0.4349	Tsen15
-1.133	1.937	0.4351	Gadd45b
-0.6394	2.832	0.4351	Josd2
-0.3317	3.439	0.4351	Tjap1
-0.7665	5.157	0.4351	Arhgap31
0.7999	2.377	0.4351	Mcf2
-0.4382	3.714	0.4351	Herpud1
0.2367	5.109	0.4351	Trappc6b
0.6527	3.881	0.4351	Fjx1
0.3437	4.071	0.4351	Uqcr11
-0.2647	6.881	0.4351	Camkmt
-0.4342	3.221	0.4352	Nudt13
-1.33	3.135	0.4356	Lrrc55
-0.3172	4.459	0.4356	Ipmk
0.5557	2.65	0.4357	Mettl22
-1.026	2.402	0.4359	Egr4
0.5315	2.75	0.4363	Gm28756
0.4841	2.815	0.4363	Nelfe
-0.1854	6.541	0.4367	Gapvd1
-0.237	4.779	0.437	Pex1
0.3062	4.295	0.437	Mybbp1a
0.9618	4.824	0.437	Timp3
-0.2479	6.751	0.4373	Rnf169
-0.4485	2.602	0.4373	BC024063
-0.5938	2.892	0.4373	Rbbp8
-0.5367	4.397	0.4373	Adrb1
-0.8554	5.741	0.4373	Gm2164
0.2671	5.111	0.4373	Wdr44
-0.37	8.943	0.4373	Brinp1
0.4898	3.786	0.4374	Fbxo32
-0.3611	5.102	0.4377	C030017B01Rik
0.4384	2.987	0.4377	Mcrs1
0.7745	7.259	0.4378	Thsd7b
-0.2211	7.054	0.4384	Abcc5
0.2005	6.146	0.4399	Atp5pb
-0.2831	7.239	0.4404	Lmtk2
-0.226	4.957	0.4404	Nup210
-1.533	2.744	0.4406	Sh2d4b
-0.5804	2.968	0.4406	Gpr68
0.2831	4.694	0.4412	Gatb
-0.2745	7.184	0.4412	Osbp2
-1.25	2.345	0.4412	Eps8l1
0.2783	4.42	0.4412	Atp7a
-0.3741	3.369	0.4413	Prpf4
0.2754	5.311	0.4413	Psmb1
-0.2842	6.85	0.4413	Nrd1
0.7514	1.68	0.4413	Stk36
0.2398	7.068	0.4413	Sesn3
-0.3364	4.683	0.4413	Reep2
0.3011	3.906	0.4413	Snrpa
0.4293	4.498	0.4413	Ago4
-0.6195	2.822	0.4413	Mex3b
-0.2391	6.39	0.4413	Map4k5
0.332	4.156	0.4413	Dnajb9
0.2961	4.259	0.4413	Tmed4
-0.5257	2.704	0.4413	4930428E07Rik
0.5602	2.732	0.4413	Sephs2
-0.4045	3.536	0.4413	Nsdhl
-0.8837	3.313	0.4413	4921539H07Rik
0.4181	3.595	0.4413	Degs1
0.3183	4.241	0.4413	Fnta
-0.2687	7.588	0.4413	Syngap1
0.2731	4.463	0.4413	Bcas2
-0.4859	6.595	0.4413	Fam81a
-0.2184	8.869	0.4413	Plxna4
-0.949	1.808	0.4413	Yrdc
0.6411	3.056	0.4413	H2az2
-0.2538	6.057	0.4413	Ttbk1
1.226	6.846	0.4415	Atp1a2
0.3816	4.175	0.4415	Mrps25
0.9102	5.044	0.4416	Myo10
0.3755	5.853	0.4416	Tbc1d8
0.5098	2.961	0.4418	Gm16638
-0.2322	6.54	0.4418	Ttc14
-0.4042	3.295	0.4418	Zfp53
0.4955	4.677	0.4418	Gm50304
1.121	3.234	0.4418	ENSMUSG00000120400
-0.2416	9.523	0.4418	Kcnq3
-0.3439	5.244	0.4419	Slc25a25
0.3059	4.164	0.4419	6030458C11Rik
0.3364	3.442	0.4419	Smyd5
0.4027	2.999	0.4419	Pagr1a
0.4758	8.033	0.4419	Grm3
-0.6972	1.976	0.4419	Gpr135
0.3616	4.286	0.4421	Doc2b
-0.4111	5.107	0.4421	Pola1
-0.9142	1.674	0.4421	1700086O06Rik
0.4281	3.609	0.4421	Rccd1
0.5534	2.294	0.4421	Paxx
0.2846	3.971	0.4425	Macroh2a2
-0.5664	4.203	0.4429	Midn
-0.2935	4.805	0.4429	Selenok
0.5851	1.975	0.4429	Brf2
-0.21	7.851	0.4439	Mllt3
-0.3781	3.361	0.4439	Spata6l
0.7306	2.306	0.4439	Gm21814
-0.2798	4.372	0.4439	Rnf138
-0.7337	2.614	0.4439	AY036118
0.5202	2.667	0.444	Nfkbia
0.694	2.919	0.444	Scn5a
0.4571	3.364	0.444	Mrps14
0.4492	3.483	0.444	Ermard
0.4292	3.207	0.4443	Rab33b
0.5509	7.835	0.4445	Qki
0.5652	4.406	0.4445	Gpld1
0.6905	3.423	0.4445	Mtfr1l
-0.1967	7.468	0.4445	Ubn2
0.4915	2.367	0.4445	ENSMUSG00000121134
-0.3196	6.983	0.4445	Osbpl1a
0.4216	3.63	0.4447	Adpgk
-0.839	2.48	0.4447	Efemp1
0.9372	4.16	0.4455	Csrp1
0.2784	5.718	0.4455	Xiap
-0.4549	5.058	0.446	Gm14636
0.3872	3.506	0.446	Gtf2e1
-0.4392	4.129	0.446	Mettl15
-0.2133	5.614	0.446	Ctcf
0.1917	6.83	0.446	Tbl1x
-0.2675	9.364	0.446	Mir6236
-0.8209	2.556	0.446	Shisa3
-0.2927	12.23	0.4464	Kcnip4
1.203	3.116	0.4476	Vav1
-0.2633	4.567	0.4478	Sptlc1
0.7707	2.058	0.4481	Zfp354b
-0.2334	6.73	0.4488	Ssbp3
-1.25	2.691	0.4488	Tmem232
0.2884	6.086	0.4488	Catspere2
1.357	2.701	0.4488	Kl
0.2323	5.298	0.4488	Ago1
0.3739	4.195	0.4488	Hmgxb4
-0.5962	2.237	0.4488	Snrpg
0.3828	4.505	0.4488	Rpl31
-0.4574	3.727	0.4488	Vps18
0.5216	5.147	0.4488	Gna12
0.3503	5.563	0.4488	Gnai2
0.5457	4.061	0.4488	Oprd1
0.5998	2.308	0.4488	Tmem160
0.1842	6.407	0.4488	Sf3b2
1.076	3.74	0.4488	Cdh23
0.4724	3.839	0.4488	Gm45847
0.324	4.304	0.4488	Chmp2a
-0.4652	4.634	0.4488	Kcnc4
0.3262	3.918	0.4488	Mta2
0.3691	3.495	0.4488	Stard10
0.5566	4.196	0.4488	Tmem255a
0.2424	5.264	0.4488	Klhl22
0.9698	4.659	0.4488	Ccdc141
0.4665	2.757	0.4488	Tmem14c
0.5866	3.381	0.4488	Mrpl41
0.8396	1.701	0.4488	Galnt3
0.3304	3.477	0.4488	Parp2
-0.5716	3.593	0.4493	Gm33524
-2.866	2.894	0.45	Mdfic2
-0.3726	3.72	0.4501	Malsu1
-0.2695	4.907	0.4505	Pigu
-0.3185	7.38	0.4512	Pak1
0.3574	3.873	0.4512	Zkscan8
-0.3454	3.675	0.4512	Prr7
0.3763	3.873	0.4512	Tmem242
-0.4536	3.948	0.4512	Shkbp1
0.5278	2.228	0.4512	Oard1
0.55	2.691	0.4512	Zfp212
0.3491	4.042	0.4512	Jag2
0.4701	3.785	0.4512	Arl4c
-0.3771	4.101	0.4512	Gm5441
-0.5355	3.226	0.4512	Gm13844
0.2738	5.739	0.4512	Asah1
0.3368	4.86	0.4522	Itprid2
0.2082	6.825	0.4526	Capza2
-0.4717	4.185	0.4526	Zfp180
-0.2752	6.43	0.4526	Zc3h12b
0.8123	3.301	0.4526	Plxnb1
0.2033	5.9	0.453	Rufy2
0.3002	4.448	0.453	Rps27a
0.5466	4.554	0.453	Cep128
-0.3067	5.826	0.4531	Rheb
0.7661	2.184	0.4544	Carhsp1
-0.2827	6.992	0.4544	Lrrfip1
0.2397	4.814	0.4544	Psma1
-0.2049	7.743	0.4544	Plcl2
1.117	2.931	0.4544	Adgre1
0.2626	7.592	0.4544	Itm2b
0.6785	2.045	0.4544	Slc13a5
0.3392	3.222	0.4544	Antkmt
0.4038	3.339	0.4544	Fam222a
-0.2762	6.016	0.4544	Kras
0.3843	3.584	0.4544	Kbtbd7
-0.4267	3.122	0.4544	Tmem208
-0.442	4.286	0.4544	Kcnk12
0.7637	3.308	0.4548	Pald1
0.8118	5.431	0.4548	Pcp4l1
0.9142	3.181	0.4548	Rapgef3
0.2443	4.514	0.455	Tdrkh
0.7097	4.865	0.455	Cachd1
-0.2518	5.069	0.455	Slx4ip
0.2492	7.014	0.4551	Slc25a4
0.4426	2.709	0.4551	Nop10
-0.3927	4.381	0.4554	Ino80dos
-0.4597	3.272	0.4554	Gm15494
-0.3061	4.661	0.4554	Minpp1
0.4159	3.651	0.4554	Elmod2
0.484	3.67	0.4554	Rps27
-0.3099	11.62	0.4554	Meg3
-0.2742	5.834	0.4554	Phlpp2
0.5794	5.121	0.4554	Rhoq
0.4977	3.174	0.4554	Itga3
1.138	6.911	0.4554	Gad1
-0.2669	4.714	0.4554	Mob2
-0.5884	5.248	0.4554	Atp6v0c
-0.2638	5.328	0.4554	Mpc1
0.6552	3.247	0.4554	Rps6ka1
-0.3408	4.205	0.4554	Rab36
-0.3186	3.907	0.4554	Ostc
0.301	3.711	0.4559	Ugdh
-0.9532	1.709	0.456	Rtkn2
-0.4061	5.981	0.4562	Ptpre
0.4317	5.29	0.4563	Rcn2
1.023	3.594	0.4584	Bank1
-0.2481	6.188	0.4588	Atcay
0.2921	5.724	0.4588	Mier1
-0.2766	11.61	0.4597	Nrg3
-0.2485	4.932	0.4597	Rnf4
-0.2461	6.611	0.4597	Spen
0.3731	3.444	0.4602	Thumpd2
0.6495	3.529	0.4602	Pde8a
0.6862	2.876	0.4605	Tec
-0.376	3.69	0.4605	Spata2
0.3078	3.826	0.4605	AI597479
0.5787	2.469	0.4605	Nup37
-0.2999	5.217	0.4605	Foxk1
-1.303	2.711	0.4605	Gm40578
-0.36	5.802	0.461	Cacng8
-0.9402	3.233	0.4612	Mal
0.5146	3.052	0.4612	Qpct
0.4328	7.067	0.4617	Gm28905
0.6028	2.025	0.4618	Tmco6
-0.384	5.553	0.4624	Stmn4
0.3488	5.062	0.4628	Fig4
-0.2805	6.074	0.4628	Cpeb1
-0.3786	10.61	0.4628	Dlgap1
0.3195	5.243	0.4628	Laptm4a
-0.6929	5.593	0.4628	Nr4a1
0.6176	4.471	0.4628	0610040J01Rik
0.6945	2.466	0.463	Slc27a2
-0.8735	2.177	0.4631	Skap1
0.7243	6.32	0.4634	Clu
-0.3535	5.109	0.4634	Pak6
-0.3451	4.704	0.4634	Aldh7a1
0.3495	3.429	0.4634	Mkrn2
0.5116	2.824	0.4634	Map3k19
-0.2416	5.892	0.4634	Lnpk
-0.3751	5.332	0.4634	Icam5
0.3395	6.038	0.4634	Phkb
-0.5499	3.821	0.4638	Slc9a5
-0.3146	5.037	0.4638	Gm44560
[truncated: 55,011 more rows]

## Sheet: DE-4_Microglia
logFC	AveExpr	p_val_adj	gene_names
-6.75	6.249	3.532e-11	Atp8a2
2.492	9.736	1.108e-08	Arsb
3.216	5.835	1.108e-08	Nme7
-4.48	3.169	9.225e-08	Gm43821
-5.654	2.512	1.357e-07	Mpp7
6.269	-0.482	5.39e-07	Ang4
2.471	4.703	5.39e-07	Qsox1
1.461	7.63	5.39e-07	Xpr1
-1.365	7.469	1.155e-06	F11r
4.012	2.608	1.919e-06	Cd36
2.15	3.76	2.274e-06	Arhgap27os3
-1.554	4.147	3.156e-06	Zfp862-ps
-1.263	5.043	3.201e-06	Smo
6.276	0.4034	4.236e-06	Adgrg5
-1.895	4.216	4.971e-06	Ang
5.888	2.287	5.063e-06	Gnb4
1.707	5.936	5.345e-06	Tom1l1
1.198	5.202	5.345e-06	Zfp729a
-5.43	-1.663	5.636e-06	Gm19716
1.108	6.786	7.068e-06	Ipcef1
1.331	4.77	7.868e-06	Bzw2
4.654	-1.294	8.859e-06	Rprl3
-2.131	5.885	8.859e-06	Gm45837
3.556	0.8419	1.441e-05	Atp6v0e2
4.497	-1.362	1.441e-05	Gm40864
1.705	3.534	1.795e-05	Slamf8
3.003	6.572	2.032e-05	Nrxn1
-1.668	3.817	2.083e-05	Rasgrf2
4.718	4.768	2.125e-05	Colec12
-1.242	5.409	2.125e-05	Ecscr
5.147	-1.025	2.125e-05	Rpl31-ps21
1.55	3.84	2.221e-05	Rasgrp4
1.637	4.049	2.222e-05	Masp1
-1.592	3.611	2.222e-05	Olfml2b
4.318	-1.456	2.222e-05	Gm5503
-1.665	3.762	2.467e-05	Cep85
-1.937	2.78	2.467e-05	Gm10521
-1.988	2.502	3.451e-05	Trim30c
1.567	4.089	3.583e-05	Cdk5rap1
-3.172	3.353	3.908e-05	Samd4
4.993	-0.7453	4.188e-05	Gm40847
2.134	3.509	4.188e-05	Sh3rf1
1.951	4.086	4.608e-05	Gm12610
4.554	-0.5213	4.63e-05	B230206L02Rik
1.806	4.458	5.411e-05	Gm10138
0.8543	5.736	5.411e-05	Wdfy1
0.8717	7.539	5.411e-05	Rasal2
-4.873	-1.188	5.411e-05	Cldn34c1
4.726	-0.773	5.889e-05	Scml2
4.704	-1.121	6.075e-05	Klk1b22
-1.034	5.095	6.326e-05	Arsk
0.9141	7.967	6.636e-05	Chst11
-3.659	0.7344	6.91e-05	Pde2a
1.343	5.523	7.025e-05	Cmtm8
1.127	7.712	7.214e-05	Atg10
-5.497	-0.6566	7.445e-05	Lyve1
-1.394	3.683	7.639e-05	Acsf2
3.991	-1.23	7.701e-05	Lilra6
1.13	4.919	7.701e-05	Nod1
0.9014	5.807	8.389e-05	Plpp1
-5.581	0.5416	8.389e-05	Zfp125
-1.016	5.786	8.472e-05	Ide
-3.763	-0.2627	8.54e-05	Unc5a
1.364	3.73	8.54e-05	Gm47469
-1.054	4.242	8.567e-05	Rcan3
3.393	-1.067	8.567e-05	Gm48733
0.9527	9.306	9.422e-05	Wwox
1.002	6.626	9.422e-05	Fggy
-3.011	1.079	9.621e-05	C130046K22Rik
0.9355	6.525	9.621e-05	Mapkapk2
-2.357	1.482	0.000103	Zc2hc1a
-1.619	3.995	0.0001038	Abcg3
3.137	1.85	0.0001159	Gm12861
-1.23	4.175	0.0001162	Clcf1
1.189	5.309	0.0001162	Slc25a25
-1.1	5.17	0.0001185	Fam3c
1.433	4.462	0.0001243	Plekhh2
-0.9712	4.926	0.0001272	Zfp467
0.7472	7.896	0.0001272	Lpp
-1.304	3.338	0.0001272	Nudt6
-4.023	0.5955	0.0001272	Fgf2
1.083	6.661	0.0001296	Sgk1
-1.214	3.841	0.0001469	Nipal3
0.7773	7.249	0.0001469	Tspan7
1.568	3.042	0.0001591	Spock1
0.8883	7.504	0.0001664	Slc15a3
1.346	8.081	0.0001706	Ssbp2
-2.676	0.6226	0.0001706	Copz2
6.536	0.8069	0.0001836	Gm49692
-1.696	3.249	0.0001838	Gm26782
0.891	6.514	0.0001838	Evi2
-0.7798	6.91	0.0001895	Kif13a
1.077	5.459	0.0001895	Igsf8
2.228	2.686	0.0002051	AI504432
-1.241	2.842	0.0002138	Sall2
2.251	2.635	0.0002309	Gm15880
0.7272	6.693	0.0002335	Naalad2
4.523	1.19	0.0002377	Gm29536
3.405	1.925	0.0002426	Pcnx2
0.8834	9.307	0.0002557	Klf12
0.8876	4.792	0.0002572	Pdia5
1.803	5.559	0.000281	Ube2e2
-5.049	2.12	0.000281	ENSMUSG00000121318
1.083	4.287	0.000281	Nectin2
0.8794	7.699	0.0002941	Apbb2
1.435	5.206	0.0003026	1700025G04Rik
0.6842	7.304	0.0003081	Clip1
4.658	0.002818	0.0003103	Gm14584
1.298	6.958	0.0003299	Arhgap15
1.296	3.328	0.0003401	Glrx
2.172	1.896	0.0003401	ENSMUSG00000119955
-1.782	4.487	0.0003401	Trps1
-4.07	-0.5753	0.000351	ENSMUSG00000120221
-3.436	0.5909	0.000351	Naip3-ps1
-0.7295	6.894	0.000353	Ggta1
0.9615	5.88	0.000362	Gm49342
3.403	-0.4602	0.000362	Pcna-ps2
0.6543	8.193	0.0003668	Peli2
1.154	4.656	0.000371	Synj2
1.839	2.712	0.0004102	Tuba1c
1.783	5.18	0.0004374	Sfmbt2
1.074	3.893	0.0004374	Acvrl1
-0.7991	5.545	0.0004496	Stard8
2.535	1.363	0.0004533	Zc3hav1l
0.8802	4.825	0.0004667	Mmp2
2.086	2.882	0.0004682	Spry1
-3.727	-0.2306	0.0004752	Ms4a4a
0.8946	4.771	0.0004983	Acaca
0.5715	7.95	0.0005161	Tnfrsf21
1.424	3.573	0.0005278	Zfyve21
0.5515	9.008	0.0005281	Cux1
1.252	5.26	0.0005281	Map3k20
-0.8027	7.935	0.0005281	Stab1
1.202	8.834	0.0005281	Hdac9
0.6348	7.442	0.0005395	Atf6
1.578	3.882	0.0005817	Marcksl1
0.8493	5.59	0.0005817	Tnfsf13b
-1.007	3.379	0.0006272	Nsdhl
-2.078	1.353	0.0006332	Ptpn14
0.9007	4.6	0.0006361	Prelid2
0.831	4.447	0.0006392	Myh10
1.333	3.365	0.0006499	Blm
0.6735	5.273	0.0006515	Txnrd1
-0.9625	3.987	0.0006579	Gm47754
0.857	9.312	0.0006853	Plek
0.8365	4.664	0.0006853	Stk38l
0.9358	5.857	0.0006853	A330023F24Rik
-0.8745	4.304	0.0006853	Sparcl1
2.518	2.746	0.0007207	Unc5cl
1.877	2.605	0.000732	Gm49393
-0.9146	6.957	0.0008192	Slc12a2
5.602	4.163	0.0008638	Cd300lf
0.6361	6.631	0.0008703	Tspan13
1.574	3.748	0.0008789	Mcc
-0.6569	5.612	0.0009104	Tppp
-4.908	2.095	0.000916	F13a1
-2.287	1.717	0.0009184	Stpg1
0.9223	4.004	0.001038	Slc66a1
0.9799	5.019	0.001038	Fhad1
-3.847	-0.5887	0.001038	Gm20559
2.717	0.728	0.001081	Parpbp
-0.9194	4.91	0.001099	Cast
1.026	5.943	0.001139	Sfi1
-4.306	-0.05609	0.001139	Ifi213
-0.7967	5.829	0.001142	Slc1a2
-2.076	0.8085	0.001151	Sec16b
0.6048	7.554	0.001161	Pfkfb3
-0.9583	5.5	0.001161	Ablim1
-0.8811	5.099	0.001163	Nln
1.772	2.516	0.001172	Plppr4
0.534	7.222	0.001173	Setd3
0.722	6	0.00118	Csnk1g3
2.295	1.676	0.001202	Lmna
0.989	5.608	0.001202	Plekho2
0.7245	5.056	0.001252	Spns2
-0.8007	5.066	0.001252	Ms4a6b
1.028	4.136	0.001281	Ctdspl
1.124	2.948	0.001281	Gramd3
0.556	8.839	0.001308	Rtn1
0.6631	7.59	0.001349	Aim2
0.9728	4.468	0.001375	A630089N07Rik
0.599	6.303	0.001414	Azin1
-0.6061	6.248	0.001414	Irf2bp2
-1.499	3.403	0.001414	Ccnb1ip1
-2.449	0.7901	0.001419	Samd9l
1.387	2.295	0.001434	Nbl1
4.16	-0.3774	0.001454	Gm37800
0.6738	5.937	0.001456	Tdrd3
3.882	2.505	0.001456	Rab37
1.497	6.933	0.001457	Il1a
0.7109	5.848	0.001476	Tbc1d1
2.611	2.382	0.001516	Kcp
-0.7142	4.489	0.001516	Coa8
0.736	4.993	0.00152	Ppp1r13b
0.6691	6.175	0.00152	Grk3
0.8015	9.508	0.00153	Cadm1
0.7375	8.595	0.00153	Cables1
0.6633	5.354	0.00153	Cep43
-0.7773	4.891	0.00153	Zfp691
0.4776	6.742	0.001576	Pik3cb
6.002	0.814	0.001576	Actr3-ps
0.7512	5.809	0.001576	Hnrnpdl
0.5623	7.684	0.001581	Lrrc8d
-1.245	3.333	0.001621	Tatdn3
0.8841	4.535	0.001635	Tagln2
-3.13	0.7917	0.001658	Enpp5
1.561	3.561	0.001668	Id2
0.5906	5.47	0.001681	St7
-1.692	1.821	0.001681	Rnase6
1.276	5.827	0.001681	Btg2
0.9383	7.113	0.001713	Wsb1
0.4971	6.661	0.00177	Padi2
0.819	6.857	0.00177	Pea15a
-1.524	1.985	0.001787	Pla2g7
-0.6309	5.163	0.001793	Zfp398
0.6595	6.648	0.001793	Litaf
0.6762	6.236	0.001798	Tbpl1
2.679	0.5375	0.001907	Car13
0.68	7.53	0.001907	Sfmbt1
1.563	4.139	0.001907	Mafk
-0.7701	4.025	0.001907	Dpy19l3
-0.5532	6.21	0.001926	Atp6v0b
0.636	5.632	0.001979	Ccl6
1.688	1.827	0.001998	Trerf1
-1.697	1.392	0.002029	Iqgap2
0.7133	5.804	0.002029	Hspa12a
0.6098	6.497	0.002029	Coro7
-0.9162	3.161	0.002033	Ccdc28b
0.8844	3.74	0.002163	Ezh2
0.6227	8.488	0.002194	Gna12
0.6156	6.405	0.00224	Tmx4
0.6092	6.134	0.002271	Slc16a10
1.017	4.366	0.002274	Srgap3
0.4831	7.944	0.002279	Eml4
0.6483	5.821	0.002288	Rasa4
-0.5129	7.51	0.002307	Abcc3
-0.8353	4.009	0.002314	Dusp12
-0.9821	4.469	0.00233	Hacd4
0.5008	7.538	0.00233	Pacs1
0.7703	4.811	0.00233	Rabgef1
-2.405	2.931	0.00233	Pde10a
-2.062	0.8274	0.002378	Igsf9
1.785	3.232	0.002423	Csrnp1
-0.5036	8.477	0.00243	Slc7a8
0.9325	4.625	0.002435	Cited2
-0.6952	4.401	0.002569	Ro60
0.8662	4.455	0.002596	Hmga2-ps1
-0.7956	3.891	0.002625	Pink1
0.6389	6.101	0.002625	Fam107b
2.11	1.256	0.002671	Il1r2
1.817	2.408	0.002702	Or5v1
-0.4945	5.931	0.002706	B230219D22Rik
0.4922	6.505	0.002869	Rufy3
0.4826	6.154	0.002869	Cyria
0.6321	4.229	0.00289	Pld2
1.258	3.221	0.00289	Haao
-0.7156	6.572	0.002891	Crybb1
0.816	3.286	0.002934	Oprm1
0.6214	6.354	0.002934	Stau2
-0.5616	6.38	0.002981	Abhd15
0.8426	8.649	0.003019	Kcnma1
0.9708	4.138	0.003023	Afap1
-0.5267	5.364	0.003037	Stard3nl
-0.7136	9.16	0.003037	Magi1
-0.6796	8.278	0.003037	Cd84
-1.679	1.517	0.003037	Amer2
0.9462	3.176	0.003086	Rcc1
1.469	2.008	0.00312	Iho1
-0.9246	4.243	0.003121	Tgfbi
0.4857	7.748	0.003177	Tec
-0.5456	6.847	0.003192	Plxdc1
-1.545	4.539	0.003192	Rpl29
0.5677	5.806	0.003192	Rcan1
1.486	5.321	0.0032	Creb5
-0.8682	3.298	0.003269	Dbi
1.431	2.881	0.003272	Ctla2b
-0.6567	4.458	0.003272	Gm46515
0.6865	6.334	0.003317	Usp6nl
-1.012	3	0.003443	Kcnj9
-2.215	0.9916	0.003476	Vav3
0.9344	3.497	0.003508	Gm20721
-0.5491	5.8	0.003508	Exoc3
0.558	6.393	0.003508	Klhl6
-0.8658	5.368	0.00357	Mcur1
-1.042	3.02	0.003607	Gm10069
0.6622	3.985	0.003607	Gsdme
0.6541	5.747	0.003607	Klc1
0.7557	6.309	0.003626	Ahdc1
-1.269	2.342	0.003691	Rps4l
0.5588	5.781	0.003716	Uhrf1bp1
-1.569	1.96	0.003721	Adgre4
1.348	1.568	0.003748	Nsl1
0.6404	4.124	0.003748	2900026A02Rik
0.4818	10.92	0.003748	Plcl1
0.8827	4.925	0.003784	Stxbp4
2.35	-0.3261	0.003802	ENSMUSG00000121487
0.5351	8.068	0.003896	Fus
0.6336	6.086	0.003955	Rnls
1.008	6.392	0.003958	Srgn
-0.5941	5.016	0.004057	Gpd1l
0.5714	4.727	0.004066	Slbp
0.6607	5.027	0.004098	Tasl
1.044	5.489	0.004116	Tagap
0.4779	7.401	0.004123	Acsl4
1.208	2.558	0.004128	Ccr2
1.096	3.144	0.004166	Taf13
-1.959	0.504	0.004166	Slc25a54
1.895	1.102	0.0042	Gm47448
2.01	1.289	0.0042	Art3
-2.053	2.158	0.004215	Gm10874
1.395	1.628	0.004215	Gm36445
0.4799	8.26	0.004215	Gtdc1
-1.253	3.98	0.004215	Gm54867
-1.316	2.591	0.004215	Mdfi
0.981	2.981	0.004215	Nxpe3
0.8343	4.175	0.004287	H2-Ob
1.338	2.913	0.004318	F630206G17Rik
-0.9398	3.173	0.004341	Mboat1
-3.685	1.562	0.004341	Ifi204
0.5243	8.115	0.004341	Kcnk13
0.4552	7.714	0.004341	Elk3
0.4796	8.159	0.004341	Arhgap25
-0.5437	5.916	0.004341	Rab11fip5
0.9811	2.709	0.004392	Zfp458
-0.6885	3.863	0.004392	Pde8a
1.575	3.125	0.004431	Chic1
2.282	2.08	0.004443	Gm29282
0.5801	4.956	0.004443	Cep290
0.9051	7.081	0.004443	Gpr183
0.5794	7.787	0.004456	Ppp1r21
2.823	2.836	0.004456	Cacng8
0.8494	3.835	0.004457	Selenon
0.7559	4.318	0.004457	Slc7a5
-0.6466	6.321	0.004457	Rbfox1
-2.063	0.6651	0.004486	Gm3055
1.276	2.525	0.004499	Ccdc102a
3.519	-0.1906	0.004516	Gm19196
0.6156	6.126	0.004534	Nova1
-2.731	2.212	0.004565	Enpp4
0.5078	5.553	0.004565	Trp53bp2
1.444	2.143	0.004565	Capn1
-0.4825	6.685	0.004647	Tmem50a
-0.4955	6.115	0.004647	Il16
-3.961	-0.6015	0.004672	Gm13274
-2.549	0.3524	0.004684	Gm40916
-0.647	5.175	0.004684	Trim36
2.693	-0.1043	0.004819	ENSMUSG00000120240
-1.4	2.083	0.004878	Slc25a21
1.761	0.5712	0.004878	4933404O12Rik
1.493	3.145	0.004878	Cdkn1a
-4.204	2.559	0.004935	4930481A15Rik
0.5956	4.132	0.004965	Homer1
0.4098	7.062	0.005003	Eif4a2
0.4541	5.528	0.005003	Micos10
-1.817	0.1318	0.005003	Gm46440
-1.748	1.068	0.005018	Tmem150b
-0.6263	5.151	0.005046	Clec4a3
0.3853	7.26	0.005046	Npc1
-1.99	0.1248	0.005046	Btbd11
-0.8916	3.17	0.005066	Slc35d2
0.4391	6.193	0.005164	Ipo9
1.534	1.247	0.005236	Gm50240
0.5544	5.507	0.005273	Focad
-1.858	0.6047	0.00528	Gm42944
0.6003	4.731	0.005281	Naa20
1.187	4.649	0.005305	Errfi1
-0.7746	3.057	0.005305	Mrps33
1.608	1.823	0.005305	Tob1
1.63	2.884	0.005305	Pmaip1
0.5874	7.181	0.005305	Ust
2.848	0.2023	0.005305	Gm11787
0.9831	3.48	0.005363	Nabp1
-0.4271	6.162	0.005387	Cr1l
-0.4588	7.13	0.005395	Btaf1
0.5113	6.344	0.005419	Magi3
0.4158	6.379	0.00545	Clip2
0.9215	3.066	0.005474	Gm41804
5.672	1.494	0.005474	4930519F16Rik
0.431	6.759	0.00548	Atp7a
0.5393	5.871	0.005519	Mad1l1
0.417	7.21	0.00552	Usp12
-0.537	4.951	0.005571	Dse
2.39	0.8871	0.005571	Gm47794
-0.6048	6.786	0.005596	Rab6b
-1.915	1.202	0.005659	Ica1
-0.6905	4.147	0.005706	Ccdc85c
1.305	5.774	0.005713	Zfp36
0.8372	2.905	0.005713	Akap5
-0.6542	3.702	0.005755	Luzp2
0.5912	5.443	0.005879	Zfp827
-0.4216	7.89	0.005879	Rassf2
0.6406	5.513	0.005879	Zfp69
0.9878	3.634	0.005879	Smad6
0.4943	7.769	0.0059	Gcnt1
1.664	0.9376	0.00595	Synpo
-0.5413	5.638	0.005951	Lpin1
-0.5319	8.027	0.00611	P4ha1
0.4318	6.767	0.006112	Acox3
-0.5735	7.052	0.006112	Chsy1
0.5998	7.21	0.006173	Samsn1
1.386	2.552	0.006269	Lrrc8b
0.5045	6.55	0.006269	Il1rl2
4.018	4.561	0.006317	Gm12865
0.5059	11.06	0.006331	Tmcc3
-0.4861	4.867	0.006331	1110002L01Rik
-0.4605	6.054	0.006415	Cysltr1
-0.6592	3.616	0.006524	Mettl3
0.587	4.922	0.006539	Snx8
0.7145	7.147	0.00658	Vps41
0.6829	6.724	0.00658	Rel
-1.427	1.152	0.00678	Cfap126
1.602	1.659	0.006799	Sik1
-0.6224	6.721	0.00687	Iqsec2
0.9131	2.411	0.00687	Dusp10
1.592	0.7428	0.00687	Brip1
1.427	1.76	0.006931	Tnfrsf12a
0.9731	5.009	0.006931	Tgif1
0.6435	4.242	0.007046	Nt5dc3
-0.7456	5.032	0.007103	Siglece
-0.8485	3.366	0.007206	Bphl
-1.997	2.129	0.007213	Ifi209
0.9662	4.396	0.007252	Plk3
-0.7962	3.491	0.007274	Gm26827
-1.205	2.158	0.007295	Psmg4
-0.7384	3.436	0.007326	Flvcr1
0.4509	8.092	0.007379	Snx13
-0.5619	9	0.007379	Maf
-1.913	1.367	0.007411	Gm32633
0.5762	5.246	0.007411	Kcnj2
1.966	0.4827	0.007426	ENSMUSG00000120135
-0.7573	4.399	0.007466	Atp1a2
1.349	0.895	0.007466	Cchcr1
-0.9478	2.329	0.0075	Iqcc
1.046	5.389	0.007658	Junb
-0.6524	4.836	0.007725	Zfp933
-1.496	0.9906	0.007732	Acss2
-1.349	1.592	0.007774	Jph3
0.7432	4.701	0.007774	Cbx4
-1.423	1.143	0.007774	Abhd14b
0.4935	6.131	0.007774	Slc9a1
0.5375	5.409	0.007774	Ano10
-0.7705	5.53	0.007774	Dusp7
-1.517	1.813	0.007774	6430590A07Rik
0.6715	3.997	0.007774	Hmgb2
0.3714	6.387	0.007816	Rab43
-0.4119	6.578	0.007938	Gm12185
-0.5865	4.713	0.007939	Card6
1.946	-0.3329	0.007958	Pira1
-0.4366	5.912	0.007958	Pot1b
1.058	7.464	0.007992	Akt3
1.522	0.7821	0.008002	C030037D09Rik
0.4149	7.149	0.008003	Galnt7
0.6967	3.746	0.008003	Slc25a13
1.572	1.991	0.008003	Klf4
1.778	5.322	0.008011	Nfkbiz
1.648	1.769	0.008263	Gm44574
0.3967	8.53	0.008295	Rab8b
0.8302	2.742	0.008295	Sesn2
0.8873	3.257	0.008295	Txnl4a
0.4704	5.55	0.008316	Sub1
2.335	3.567	0.008316	Ccrl2
-0.4467	6.901	0.008316	Cd47
0.8188	4.389	0.008316	Ets2
-0.4291	7.774	0.008465	Pik3cg
2.646	-0.2121	0.008487	Mir22hg
0.8838	2.511	0.008497	Lyplal1
0.4226	9.418	0.008551	Gnaq
-0.5912	4.091	0.00859	Krba1
1.153	2.282	0.00859	Gm30411
-1.573	3.366	0.008617	Cyb5r1
0.9119	3.284	0.008691	Pvr
-1.14	2.269	0.008792	Gm20045
-1.178	1.809	0.008856	1190007I07Rik
0.5422	6.462	0.008856	Zfp697
-0.5337	5.017	0.008856	Cherp
0.3926	7.49	0.0089	Ubr5
1.268	4.43	0.008901	Rtp4
-1.318	0.8708	0.009088	Mill2
1.482	6.967	0.009088	Cd83
-0.424	5.602	0.009092	Smad5
0.4848	7.455	0.009092	Gspt1
0.5113	4.827	0.009092	Ppp2r1b
1.73	1.209	0.00911	ENSMUSG00000120712
-0.6024	4.429	0.009139	Kdm1b
1.765	3.242	0.009139	Tlcd2
0.5267	6.254	0.009144	Arf4
1.085	1.516	0.009144	Slc6a8
3.277	-0.821	0.009204	Cd5
0.5987	5.544	0.009204	C9orf72
-0.474	5.747	0.009295	Paip1
1.888	2.167	0.009308	Rcan2
0.579	4.259	0.009308	Niban2
0.8789	3.561	0.009308	B4galnt1
-1.719	1.358	0.009308	C030034L19Rik
2.062	0.5653	0.009371	Cfap77
-1.743	0.453	0.009371	Dcdc2b
1.441	0.7598	0.009451	Fndc7
-0.4812	7.577	0.009573	Mafb
-2.212	0.9952	0.009741	Arhgap10
1.315	1.656	0.009771	Gm10762
-0.7703	3.278	0.009807	Tmem37
-0.553	4.017	0.009807	Caml
-0.5214	5.103	0.009807	Rnf167
0.3954	6.708	0.009807	Tifab
0.4538	8.837	0.009838	Zfand3
0.5498	7.563	0.009903	Rhoh
0.3706	8.154	0.01001	Acer3
1.619	0.4721	0.01012	Or10ak7
-4.517	-0.2112	0.01018	Pf4
0.6317	4.958	0.01027	Gtf2ird1
0.3691	7.701	0.01034	Edem1
0.6445	3.724	0.01035	Get3
1.73	1.663	0.01044	ENSMUSG00000120054
-2.604	1.247	0.01058	Aoah
0.9378	8.9	0.01078	Fgf13
-1.815	0.5628	0.0108	Igf1
-2.002	-0.1038	0.01086	Zfp507
-0.9432	2.562	0.01086	Ttc23
-0.7982	2.691	0.01086	Acp1
0.5452	4.25	0.01086	Cfap20
0.4317	8.29	0.01094	Ptpra
2.755	0.5362	0.01094	Mycbpap
-0.631	3.65	0.01094	Zfp748
-1.449	2.957	0.01095	Rnf17
0.4744	5.04	0.01099	Vamp1
0.7749	6.653	0.01101	Zfand5
0.4061	5.707	0.0113	Orai2
0.6035	4.518	0.01132	Rbm3
-0.7845	3.244	0.01132	Ccdc124
0.4154	6.16	0.01132	Mroh1
0.8254	2.951	0.01132	Lamb2
-1.239	1.129	0.01138	Zfp521
-0.6046	4.019	0.01153	Mfn2
0.5665	9.951	0.01154	Rapgef5
1.324	0.7077	0.01157	Dusp8
0.6385	6.209	0.01158	Rad51b
1.519	0.947	0.01163	ENSMUSG00000120188
0.822	4.233	0.01167	Coq10b
0.9267	3.668	0.01167	Megf11
2.71	1.012	0.0117	Kcna3
0.7713	4.11	0.01189	Nfkbib
-0.6899	3.173	0.01193	Ttc32
0.4604	5.85	0.01204	Lat2
0.3782	6.863	0.01209	Zfp609
2.923	0.03775	0.01229	Ahnak2
1.908	0.006992	0.0123	Gm9891
-0.7077	4.564	0.0123	Mapkapk3
0.5845	4.949	0.0123	Jup
-1.639	0.5978	0.01233	Stxbp6
0.8062	3.844	0.01242	Pacsin1
-0.489	6.188	0.0125	Clec5a
2.203	1.352	0.01255	Gm47819
0.3854	7.149	0.01263	Fbxw11
5.361	1.318	0.01263	Pianp
0.3398	7.783	0.01263	Tnfrsf11a
0.3929	6.169	0.01275	Etf1
2.194	0.7497	0.01275	Gm4366
-0.4298	5.891	0.01275	Zkscan3
0.6662	3.385	0.01308	Depdc7
0.6449	6.687	0.01308	Ralgps2
0.9412	3.382	0.01309	Nup210
-1.581	-0.07647	0.01309	Scd1
0.3599	9.556	0.01327	Ppm1h
1.039	2.195	0.01327	Nox1
-2.801	3.965	0.01331	Mrc1
-0.8254	3.05	0.01331	Zmat3
-0.6221	3.221	0.01335	1700030K09Rik
-0.6729	3.487	0.01337	Lrrc39
-0.516	5.193	0.01337	Syf2
0.8529	5.926	0.01337	Alox5
-2.2	0.5113	0.01342	Gm35572
0.4315	6.358	0.01355	Cdc42se2
1.644	2.396	0.01364	Il1r1
-1.516	1.282	0.01364	4930447K03Rik
-1.266	5.439	0.01364	Sh3bgrl3
0.8807	2.88	0.01367	Mdm1
0.7549	4.342	0.01367	Nrep
-0.8057	3.607	0.01367	Ndufb10
0.4172	5.791	0.0137	Fam222b
1.585	1.567	0.0137	Cks2
0.4445	7.275	0.0137	Rbm5
-0.4295	6.761	0.0137	Hp1bp3
0.6033	8.45	0.0137	Cacna1d
1.118	2.708	0.0137	4933433G15Rik
-0.5853	3.489	0.0137	Mon1a
-0.5039	4.586	0.0137	Dnajc19
-1.538	5.459	0.01383	Zfp984
0.6333	5.56	0.01416	Ier5
0.5285	4.805	0.01417	Zfp40
0.4256	6.685	0.01424	Arhgap4
0.3933	8.97	0.01437	Ppp1r9a
2.195	0.09674	0.0144	Tmem51
1.215	2.521	0.01451	Hmgn3
1.198	1.653	0.01463	Zscan30
0.5083	11.97	0.01466	Plxdc2
-1.12	2.498	0.01472	Pstpip2
0.4529	8.603	0.01483	Nek7
-0.7789	3.899	0.01483	Enpp2
1.235	1.705	0.01487	Platr29
0.4294	6.69	0.01488	Pak1
0.9176	2.898	0.01523	Prdm5
-0.4228	4.981	0.01523	Rrm2b
-0.6604	3.142	0.01524	Nup210l
-0.8996	4.529	0.01533	Gm37306
0.4068	6.629	0.01534	Ddx39b
-0.5395	4.481	0.01535	Zadh2
0.4358	5.476	0.01535	Dusp3
0.451	6.104	0.0156	Dcakd
0.6068	5.35	0.0156	Rnf144b
0.5737	5.45	0.0156	Tob2
-0.7086	2.652	0.01561	Ptn
-0.4788	5.494	0.01566	Rspry1
0.9112	2.586	0.01566	Gdpd5
4.058	0.6284	0.01566	Brinp2
0.581	5.65	0.01566	Taf1d
1.835	1.972	0.0157	Rilpl2
-0.6089	3.406	0.01572	Zbtb10
2.569	0.43	0.01573	Pld5
-0.6344	5.267	0.01574	mt-Nd4
-0.3964	6.174	0.01574	9930111J21Rik2
-0.4627	4.751	0.01574	Vps26b
-0.5826	5.488	0.01589	Mras
-0.6006	4.166	0.01595	Cnpy2
1.03	1.192	0.01595	5031434O11Rik
-0.9904	1.605	0.01595	Zfp493
0.5234	5.274	0.01603	Lonrf3
-0.921	3.459	0.01615	Lrig3
0.6012	6.114	0.01615	Usp35
0.5412	3.78	0.01615	Mapre3
-0.4327	5.821	0.01615	Was
1.096	3.521	0.01615	Clic4
0.5415	6.592	0.01625	Soat1
-0.5345	4.428	0.01625	Gabarapl2
-0.4314	4.958	0.01626	Lta4h
0.4068	6.053	0.01628	Zfp516
1.507	1.764	0.01648	ENSMUSG00000120134
0.4297	6.146	0.01651	Mat2a
-1.756	0.2936	0.01651	Cyp46a1
-0.7345	4.07	0.01651	Creld2
-0.5744	5.369	0.01651	Gpr160
-0.4962	5.756	0.01661	Liph
0.4044	8.46	0.01667	Nf1
0.3854	7.251	0.01668	Suclg2
-0.5421	4.193	0.01675	Zfp629
-0.3397	7.71	0.01677	Aftph
1.223	1.447	0.01681	Vstm4
0.3712	6.028	0.01681	Abcb1b
1.558	6.298	0.01694	Rasgef1b
0.4778	4.355	0.01701	Myo1g
-0.6622	3.043	0.01703	Tbrg1
0.7369	3.554	0.01703	Cdc14b
0.5965	6.157	0.01705	Evi2a
-0.5179	5.003	0.01707	Ncoa4
-0.5059	6.959	0.01718	Frrs1
0.462	7.127	0.01718	Sncaip
0.9237	4.279	0.01729	Got1
0.5241	4.427	0.0173	Dlg4
0.4237	8.426	0.01734	Cd86
-0.4273	5.792	0.01734	Ptges3
-1.437	0.2888	0.01734	Numbl
0.3926	8.054	0.01735	Map4
0.6967	4.99	0.01735	Card11
-1.297	2.239	0.0176	Tmigd3
0.4062	6.177	0.01761	Foxo1
0.3846	6.817	0.01763	Hnrnpl
0.8883	6.537	0.0179	Mir142hg
-1.034	1.696	0.01799	9530062K07Rik
-0.751	2.376	0.01802	Scarf2
0.3908	6.988	0.01802	Tmem131l
0.4872	7.857	0.01813	Disc1
-0.7607	3.849	0.01815	Dph5
-0.9887	2.846	0.01815	Clu
1.634	0.7838	0.01815	Edn1
0.8133	5.844	0.01818	Ppp1r10
1.429	1.102	0.01821	ENSMUSG00000120996
1.006	2.547	0.01829	Snhg5
-1.173	5.845	0.01829	Gbp7
0.7738	3.288	0.01832	Phospho1
1.967	0.5751	0.01835	H4c16
0.4369	5.675	0.01838	Nubpl
-1.12	1.107	0.01838	Rpgrip1
1.258	2.492	0.01856	Dgki
-0.5518	4.08	0.01857	Thap2
-0.6622	3.288	0.01857	Bloc1s2
0.4234	5.442	0.01869	A930015D03Rik
0.3636	10.01	0.01869	Gab2
1.595	5.667	0.01869	Rgs1
0.4007	6.072	0.01875	Sergef
0.404	7.899	0.01875	Nptn
-0.5393	3.327	0.01875	Fam117a
0.3263	8.78	0.01875	Sh3kbp1
-0.5287	4.633	0.01875	Gpsm3
-0.4283	5.467	0.01875	Lsamp
0.9526	3.357	0.01875	Slc25a33
2.277	3.68	0.0189	Ccl4
0.513	3.636	0.01907	Ssh3
2.11	1.413	0.01907	Glipr2
0.7465	7.541	0.01907	Ptpro
0.4168	6.529	0.01907	Kras
0.4167	7.42	0.01917	Sdcbp
1.828	1.667	0.01924	1700020N01Rik
-0.4018	5.953	0.0193	Tmem106b
-2.481	2.139	0.0193	Tubb2b
0.391	7.186	0.01944	Osbpl8
-0.5314	5.507	0.01944	Ttr
0.3446	7.185	0.01945	Spop
-0.8881	2.905	0.01945	A430033K04Rik
1.051	1.536	0.01945	4921531C22Rik
-0.8379	2.454	0.01954	Zfp652os
0.5511	4.761	0.01961	Lbh
0.5955	3.514	0.01963	3110009E18Rik
0.4895	8.482	0.01963	Pvt1
0.7699	5.602	0.01993	Dnajb4
0.4758	5.501	0.01994	Dennd2c
2.103	1.54	0.01994	ENSMUSG00000120546
0.6776	3.272	0.02002	Ciapin1
0.4763	8.38	0.02002	Lncpint
0.3743	7.075	0.02039	Ewsr1
0.6477	3.328	0.02039	2310022B05Rik
-1.141	1.801	0.02047	Slc14a1
0.4926	6.354	0.02047	Ank
-0.3679	5.191	0.02047	Fhip2a
1.374	0.8218	0.02047	Pole
0.4011	6.545	0.02047	Ppp1r12b
-1.241	0.8036	0.02047	Fam171b
0.8929	4.479	0.02047	Scarna2
0.7814	3.937	0.02061	Pirb
0.7095	6.177	0.02061	Adamts16
0.8482	2.515	0.02061	Tnfrsf23
-1.35	1.071	0.02061	Ajuba
0.3655	8.096	0.02061	Uvrag
0.3754	6.034	0.02061	Tgm2
0.7651	4.632	0.02064	Nuak2
0.542	5.392	0.02079	Chka
0.4557	5.846	0.02087	Phtf2
1.335	1.491	0.02087	Dusp18
1.612	0.6957	0.02096	4933424G05Rik
0.5262	9.221	0.02097	Ptprm
0.4117	6.703	0.02123	Tfeb
0.5247	7.464	0.02128	Nlrp1b
2.545	2.134	0.0213	Egr2
0.5543	6.462	0.0213	Ksr1
1.301	6.162	0.0213	Neat1
-0.3452	8.808	0.0213	Il6ra
-0.4207	4.481	0.02168	Tmem43
1.085	3.12	0.02168	Gm44686
0.8543	2.423	0.02168	Dnajc12
0.5767	4.887	0.02169	Nsun6
-0.55	5.216	0.02169	4930599N23Rik
-0.4143	6.726	0.02169	Gm33989
0.7461	6.204	0.02179	Npnt
0.3685	7.17	0.02181	Tle4
0.9352	5.434	0.02183	Per1
-0.7516	2.379	0.02183	Rsl1
-0.3774	6.594	0.02183	Sec62
1.377	1.458	0.02183	Gm37334
-0.5552	3.935	0.02183	ENSMUSG00000121141
2.152	3.467	0.02187	Nr4a1
-0.6758	3.54	0.02191	Efnb1
-1.389	4.355	0.02196	Rpph1
-0.473	5.517	0.02196	Zfp658
-0.998	1.463	0.02196	Gm2415
0.3708	5.226	0.02196	Ppp1cc
0.3299	8.385	0.02213	Abi3
-0.4799	4.281	0.02213	Mrps15
0.4099	6.755	0.02213	Fbxw7
-1.502	0.7721	0.02213	Stk39
0.4314	8.126	0.02213	Msi2
1.851	0.1135	0.02213	Frem2
-0.6349	2.935	0.02213	Gnao1
0.4016	5.709	0.02213	4930517O19Rik
0.3632	9.001	0.02218	Btbd9
1.171	0.7123	0.02228	ENSMUSG00000121211
0.3802	9.178	0.02228	Exoc4
-0.6454	8.446	0.02228	Fcgr3
0.5841	6.273	0.02234	Rnf19b
1.2	2.896	0.02258	Cfap43
1.425	1.758	0.02263	Gm37305
0.3485	5.712	0.02263	Fbxl5
-0.4803	4.723	0.02263	Nol7
0.585	6.254	0.02263	Neurl1a
-0.4797	4.784	0.02263	Elmod2
-0.3828	5.246	0.02263	Trappc12
-0.7878	2.082	0.02263	Gpm6a
0.6319	4.666	0.02263	Arl5b
2.614	7.507	0.02263	Cacna1a
2.05	5.513	0.02266	Atf3
-0.2893	7.479	0.02272	Mon2
-1.273	1.311	0.02272	Gm7644
0.309	7.759	0.02276	Clint1
0.3449	6.039	0.02276	Srsf3
-0.5913	3.105	0.02278	Zfp37
-0.905	2.629	0.02278	Gm3164
0.4737	4.857	0.02287	Slc31a1
0.4749	6	0.02287	Dusp16
0.561	4.143	0.02311	Ppox
0.338	8.279	0.02316	Dnmt3a
0.3952	5.719	0.02316	Cyb561a3
0.3221	7.082	0.02316	Elf2
-0.4276	4.992	0.02316	Gm2245
0.4157	6.029	0.02316	Tspan9
0.364	5.95	0.02316	Atp6v0d1
-1.018	2.874	0.02316	Hspa4l
0.8628	2.078	0.02316	Zfp536
-0.7525	3.687	0.02324	Sgcb
-0.5416	5.998	0.02324	Nr1d2
-1.133	3.037	0.02324	Mobp
1.099	3.171	0.02324	Baiap2
-0.4106	4.567	0.02349	Tor4a
-2.201	0.07979	0.02367	Pcp4
1.605	2.051	0.02367	Gla
1.254	1.143	0.02367	Slc43a3
-1.501	3.316	0.0237	Tubb2a
-0.4033	6.8	0.02378	Copa
1.864	0.4701	0.02379	4833445I07Rik
1.059	2.57	0.02379	Gm30198
0.9054	4.329	0.02379	Zc3h12a
0.5132	6.098	0.02402	Ttc7b
0.4469	4.382	0.02409	Arhgap9
-1.121	0.7696	0.0241	ENSMUSG00000121091
-1.13	1.16	0.0241	Dscaml1
0.7346	4.171	0.02413	Anxa4
0.4372	7.315	0.02443	Mrtfa
0.4185	7.036	0.02443	Sat1
0.4492	6.161	0.0245	Vmp1
0.3176	6.356	0.0245	Pi4ka
-0.3603	6.653	0.02452	Slc43a2
0.3853	6.763	0.02462	Klhl7
0.7711	2.434	0.02463	Zgrf1
-0.7273	2.562	0.02476	Ocel1
-0.4007	4.795	0.02476	Zfp866
0.4122	5.865	0.02506	Piezo1
1.08	4.819	0.02519	Ddit3 - ENSMUSG00000025408
0.3482	7.513	0.02521	Rsrc1
1.494	0.6205	0.02532	Zfp457
2.546	3.246	0.02537	Egr1
0.7451	5.131	0.02537	St8sia6
-0.814	3.086	0.02537	Irak3
-0.8007	1.976	0.02537	Mrpl44
-0.3809	7.879	0.02537	Atp2c1
0.3681	6.267	0.02538	Cblb
-0.5299	4.431	0.02538	Uap1
-0.5103	4.868	0.02538	Anapc16
-2.703	-0.2956	0.02543	Gm13241
0.8926	3.184	0.02543	Odc1
-0.3291	6.514	0.02543	Gprasp1
-0.9743	1.671	0.02543	Wwtr1
1.182	3.009	0.02545	Cry1
-1.259	2.796	0.02546	Gm10125
-0.6088	3.899	0.02546	Thra
0.4084	7.846	0.02547	Cd180
-0.3653	6.83	0.02547	Acp2
0.7975	6.355	0.02549	2210408I21Rik
0.5299	4.888	0.02549	Tram2
-0.4817	5.725	0.02549	Tent5a
0.409	5.883	0.02549	Yaf2
-3.816	4.953	0.02549	2610035D17Rik
1.477	0.01764	0.02549	Pard6g
0.576	5.046	0.02549	Pcna
0.3765	6.672	0.02549	Srpk2
0.6392	3.172	0.02549	Fam167b
-0.6503	5.627	0.02549	Rps2
-0.3552	7.324	0.02552	Tm9sf2
1.385	0.6842	0.02558	ENSMUSG00000120408
1.314	1.378	0.02558	A930014D07Rik
-1.402	-0.03455	0.0256	4933433G19Rik
0.3383	6.777	0.02565	Atp6v1c1
0.7865	3.415	0.0261	Phkg1
-0.9603	1.288	0.0261	Gm10392
0.5016	3.93	0.0261	Tspyl2
-0.9713	1.85	0.02614	Srp54a
0.4468	5.783	0.02616	Mast2
0.5685	2.936	0.02622	Xylt2
0.5044	4.965	0.02626	Ctnnbip1
0.4089	4.484	0.02626	Dera
-1.454	0.6813	0.02633	Clec4a1
0.4412	6.276	0.02636	Map3k14
0.7706	5.148	0.02649	Rab20
-0.5165	3.561	0.02671	Zfp760
0.5398	7.221	0.02687	Tspan18
-2.921	0.4167	0.02691	Ms4a7
-0.4321	5.634	0.02691	Pycard
1.243	3.21	0.0271	Map3k19
1.034	3.588	0.02749	Gm37352
0.5424	3.431	0.02792	Tmem18
0.952	1.508	0.02842	Gm10676
-0.308	6.661	0.02842	Krcc1
0.6757	3.284	0.02842	Mms22l
0.8293	2.844	0.02842	Map3k15
2.431	0.9795	0.02842	A430093F15Rik
0.4406	7.123	0.02846	Myo1b
-0.429	4.547	0.02848	Zfp839
0.9238	5.056	0.02854	Cd52
-0.7132	3.479	0.02877	Slc13a3
1.583	2.248	0.02894	Gm14023
-0.3259	7.971	0.02904	Rps6ka1
3.157	2.075	0.02904	Gm44257
0.4134	8.164	0.02907	Abr
0.436	5.579	0.02946	Slc15a4
-0.5963	3.044	0.02955	Panx1
0.501	4.068	0.02955	Mpdu1
1.883	4.102	0.02959	Ppp1r15a
1.974	4.142	0.02959	Prkcq
1.065	1.908	0.0296	Gm41361
-0.4313	5.072	0.0297	Gm12353
-0.3261	5.833	0.0297	Chordc1
-1.149	1.904	0.0297	Postn
-1.146	4.683	0.0297	Dab2
-0.4241	4.569	0.0297	Sdhc
-0.6577	9.137	0.0297	Gm19951
0.7316	5.887	0.0297	Myo1e
0.7769	4.832	0.0297	Ifrd1
0.5814	4.886	0.02983	Pnp
-0.6606	2.55	0.02989	Rsad1
0.5422	6.816	0.02992	Srsf5
0.486	6.35	0.02999	Ccnl1
1.097	3.579	0.03013	2810013P06Rik
-0.5137	8.046	0.03013	Tbc1d9
-0.3174	9.08	0.03013	Cttnbp2nl
0.4889	7.42	0.03013	Chd2
0.4075	6.141	0.03013	Fnbp4
1.345	2.551	0.03013	Gm37876
0.398	9.485	0.03013	Large1
0.3952	8.074	0.03013	Tbc1d16
0.295	7.421	0.03013	Nktr
-0.3843	6.55	0.03013	Stat6
-0.4818	4	0.03013	Mettl4
0.3924	6.875	0.03021	Gls
0.3489	5.555	0.03021	Nxf1
0.4315	6.699	0.03021	Ptbp2
-0.7849	2.247	0.03022	Zfp637
1.249	0.6606	0.03034	Gm20663
0.3132	5.924	0.03038	Sumf1
0.5632	3.457	0.0304	Snrnp35
0.916	1.929	0.03054	Rrad
-0.438	4.879	0.03057	Agl
0.5213	4.083	0.03062	Ints7
-1.77	4.189	0.03077	Ulk4
-1.171	1.06	0.03085	1700086O06Rik
0.5716	5.094	0.031	Ell
1.278	6.73	0.03102	Jun
-0.3286	5.476	0.03102	Zfp518a
0.4155	6.13	0.03102	Ubc
1.867	0.5574	0.0311	ENSMUSG00000121109
0.3779	4.943	0.03112	Sae1
1.715	1.079	0.03112	1700023H06Rik
-1.816	0.7348	0.03112	Mt3
0.6456	4.614	0.03117	Gm12905
-0.9973	1.257	0.03156	Nfasc
0.7605	2.732	0.0316	Usb1
-0.7776	2.807	0.03161	Snrpf
-0.6174	3.317	0.0317	Mfge8
-0.7647	2.296	0.0317	Fgf11
0.3253	6.714	0.03172	Pals2
-0.341	6.639	0.03179	Purb
-0.7472	3.948	0.03194	Eif3k
0.4127	4.309	0.03194	1600020E01Rik
1.341	1.553	0.03194	1700020L13Rik
1.044	5.335	0.03194	Tnfaip3
0.4541	4.82	0.03194	Dipk1a
-0.3578	4.593	0.03206	Cfap97
1.398	3.491	0.03206	Tex14
-0.3869	4.465	0.03228	Ythdc2
-1.082	3.458	0.03228	Gm48099
-1.079	3.476	0.03228	5830444B04Rik
-0.5584	3.518	0.0327	Wdr89
0.3093	6.095	0.0329	Psmd14
-0.346	7.941	0.03292	Phyhd1
-0.9771	1.015	0.03293	Cspg5
0.3358	5.556	0.03306	Rheb
1.391	0.6116	0.03306	A530013C23Rik
0.4027	5.872	0.03306	Slc9a7
2.023	2.758	0.03306	Il1b
0.7842	4.462	0.03307	Epha2
0.2858	8.236	0.03326	Atxn7l1
0.3198	5.881	0.03326	Ap1s2
1.934	4.057	0.03333	Nfkbid
-0.3195	9.519	0.03333	Abca9
-0.5621	3.419	0.03351	Cpe
0.4439	5.778	0.03352	Tifa
-0.5774	3.086	0.03381	Rabif
1.026	1.913	0.03384	4930445E18Rik
0.3119	8.718	0.03395	Chd7
0.3003	6.897	0.03396	Faf1
-0.3839	6.272	0.03397	Pcbp1
1.347	1.711	0.03398	4833438C02Rik
0.488	7.225	0.034	Garnl3
-0.9254	1.729	0.03407	Prdm16
0.3333	7.937	0.03408	Map3k5
0.8134	2.276	0.03408	Ccdc149
-0.5759	5.982	0.03408	mt-Nd5
-1.32	0.4801	0.03408	Gulp1
0.3336	5.662	0.03408	Cln8
-0.4038	7.286	0.03408	St13
0.3809	5.395	0.03408	Srsf7
0.281	7.06	0.03408	Raly
0.5765	4.266	0.03413	Pilra
-0.7249	4.848	0.03424	Ahsa1
0.5842	3.673	0.03424	Taf7
0.9801	1.768	0.03424	Gm29811
0.3663	9.277	0.03474	Slc24a3
0.29	7.685	0.03506	Tcf20
-1.391	0.3244	0.03519	Tead1
-0.6736	2.597	0.03519	Slc24a2
0.2863	9.332	0.03524	Ptprc
2.189	1.003	0.03531	Adamts17
-0.6185	2.484	0.03532	Psme2b
-1.052	9.989	0.03532	Mir6236
-0.4244	4.242	0.03532	Ddx18
-0.3195	6.35	0.03534	Sp1
0.316	6.712	0.03538	Hnrnpd
-0.3771	4.798	0.03538	Slc25a11
-0.4685	3.607	0.03551	Senp8
-0.4962	3.33	0.03563	Gm36279
-0.9562	2.467	0.03563	Mri1
-1.554	4.354	0.03568	S1pr1
1.107	0.9665	0.03572	ENSMUSG00000121251
-0.4835	3.921	0.03596	Rbms2
-0.4931	5.153	0.03604	Slc25a26
-0.4543	4.424	0.03605	Txndc15
1.794	2.449	0.03605	Ier2
0.6474	3.753	0.03605	Ppargc1b
-0.4136	6.697	0.03616	Cep68
-0.3084	7.524	0.03616	Serinc1
0.3234	6.145	0.0363	Pphln1
0.8895	1.971	0.03652	Gm28041
1.185	1.425	0.03652	Als2cl
-1.065	1.014	0.03653	Ephb1
0.3107	5.992	0.03659	Nnt - ENSMUSG00000025453
1.395	0.9847	0.03659	4930486L24Rik
-1.038	1.136	0.0366	Kcnn2
-0.4638	3.698	0.03673	Gm26672
-0.7618	3.493	0.03673	Gbp3
1.108	0.5495	0.03673	ENSMUSG00000121108
0.6855	2.69	0.03673	Sap30
1.461	1.777	0.03673	Gm34455
-0.7968	2.845	0.03673	Gm15952
0.3357	5.266	0.03673	Myadm
-1.021	4.074	0.03673	H2-DMb1
-3.804	-1.156	0.03673	Skint3
0.4296	6.28	0.03675	Hivep1
0.504	5.901	0.03684	Prune2
0.6072	5.391	0.03688	Wdr25
-1.195	1.405	0.03697	Jcad
0.3729	4.787	0.03697	Als2
-0.4738	3.694	0.03697	Zfp961
-0.9088	1.458	0.03698	Zfp78
1.293	0.3194	0.03705	Pnp2
0.4988	5.262	0.03729	Mtmr10
0.4415	5.555	0.0374	Mta3
-0.3464	5.551	0.03744	Ccpg1
-0.4074	4.371	0.03744	Pfdn2
-0.9324	1.815	0.03765	Mycl
0.338	4.867	0.03768	Hmgcl
0.7098	3.311	0.03768	Ptp4a1 - ENSMUSG00000026064
0.3773	8.093	0.03782	Ctsc
2.224	2.114	0.03788	Bcl2a1d
0.4936	6.248	0.03788	Btg1
-0.2667	8.197	0.03793	Zfp652
-0.5974	6.604	0.03794	mt-Co1
2.389	0.1391	0.03811	ENSMUSG00000120692
-0.322	5.86	0.03811	Setd1b
1.331	0.4634	0.03811	Zfp612
-1.136	2.606	0.03811	Klhl12
2.221	0.5646	0.03814	Gm50252
-0.6608	5.416	0.03821	mt-Nd2
0.4082	6.466	0.03821	Smad7
0.388	5.738	0.03849	H3f3a
0.4678	5.447	0.03864	Eepd1
-0.5544	4.789	0.03864	Psmb8
1.044	4.84	0.03871	Bcl6
0.87	1.713	0.03876	ENSMUSG00000120648
-0.7118	2.195	0.03881	Rida
1.218	2.218	0.03883	Plekha4
0.632	2.945	0.03883	Rccd1
0.4544	3.85	0.03892	Abhd5
-0.2757	8.331	0.03895	Gdi2
0.8812	2.923	0.03901	A930024E05Rik
-0.758	1.816	0.03907	Usp53
0.384	9.776	0.03907	Numb
0.9719	3.042	0.03907	Tmem154
0.3923	6.572	0.03907	Impact
0.3458	5.954	0.03907	Slc38a2
0.4151	7.293	0.03919	Tpd52
0.3895	6.045	0.03922	Gm49797
0.3859	6.731	0.03924	Vps13c
-0.557	2.845	0.03933	Ccdc112
0.4199	4.308	0.03933	Cd276
0.3969	5.348	0.03936	Drg1
0.4095	8.062	0.0395	Dgkd
0.8063	1.726	0.0395	4930595D18Rik
0.5173	4.042	0.0395	Rgs3
0.3597	8.317	0.0395	Baz2b
-0.6994	5.309	0.03953	Cep112
0.2882	7.197	0.03962	Elf1
0.3503	5.293	0.03962	Ascc2
0.3537	6.977	0.03962	Arhgef40
-1.245	4.454	0.03965	Sult1a1
1.243	1.548	0.03988	Tmem150c
-0.5019	6.799	0.03988	mt-Cytb
0.2781	7.181	0.03988	Sik3
-1.237	1.344	0.03995	Tmem38a
0.4207	4.678	0.04048	Mmd
-0.5788	3.462	0.04048	Scnm1
1.012	2.526	0.04054	ENSMUSG00000120261
-0.3157	7.636	0.04056	P2ry6
1.503	1.367	0.04056	A630001O12Rik
0.3654	7.437	0.04063	Ube2h
1.145	1.583	0.04063	Ninj2
0.903	2.025	0.04074	Gm16192
0.362	7.281	0.04082	Znrf1
-0.6279	3.615	0.04099	Rbbp8
0.4959	5.132	0.04099	Atosa
-0.3888	4.347	0.0411	Polr1f
1.234	0.9959	0.0411	Kntc1
0.3942	7.65	0.04113	Fnip1
0.7983	1.829	0.04114	Emp2
-0.4845	4.667	0.04128	Rabac1
-0.378	5.223	0.04128	1110004F10Rik
-0.5082	4.631	0.04128	Atp5h
0.3631	7.387	0.04141	Herc1
-0.4329	4.453	0.04172	Cebpzos
0.3513	7.104	0.04172	Snx30
-1.43	6.268	0.04172	Niban1
-0.7224	2.786	0.04173	Phb
0.3679	7.169	0.04174	Lyst
0.7571	2.2	0.04176	Gm14321
0.4528	3.878	0.04191	Cnnm4
-0.5289	4.885	0.04197	Eif3f
-0.3312	4.799	0.042	Ndufa10
-1.07	0.3044	0.04205	Gm26965
-0.4147	4.307	0.04225	Tsen34
0.3366	8.851	0.04247	Arl15
0.5463	3.172	0.04248	Cdk2
1.043	0.8375	0.04253	ENSMUSG00000120045
-0.8069	1.81	0.04261	Snhg20
0.7484	4.434	0.04262	Nrbf2
-1.495	3.655	0.04264	Lilra5
0.669	4.818	0.04264	Smim3
-0.2851	5.872	0.04264	Brip1os
0.4466	5.263	0.04264	Mknk2
-0.6252	2.913	0.04264	6030442K20Rik
-0.481	5.137	0.04271	Hfe
1.306	2.271	0.04273	Gpr162
1.676	2.201	0.04279	Mcm2
0.4698	3.862	0.04286	Fam220a - ENSMUSG00000083012
-0.7333	2.422	0.04305	Mrpl35
-0.5432	3.093	0.04307	Pik3c2b
0.4306	6.824	0.04307	Traf3
0.4785	10.03	0.04307	Snx29
-0.5973	4.004	0.04307	Uqcrb
-0.4958	7.654	0.04307	Fcer1g
-3.374	4.715	0.04309	Ppfia4
1.172	0.5494	0.04309	Rapgefl1
0.3915	4.906	0.04324	Zfp395
1.219	0.821	0.0433	ENSMUSG00000120539
-0.727	3.176	0.0433	Wdr83os
0.3108	8.245	0.0433	Efhd2
-0.4743	3.632	0.04332	Rdh5
0.3939	4.615	0.04339	Cntln
0.458	5.249	0.04339	D130040H23Rik
-0.3592	5.181	0.04339	Jmy
1.214	0.7738	0.04342	Ada
0.5152	3.994	0.04345	Atad2
-0.3576	4.563	0.04345	Rnpepl1
-0.6944	4.586	0.04355	Itsn1
1.531	0.8616	0.04375	Shcbp1l
0.2918	7.245	0.04385	Hipk2
-0.3931	4.556	0.04385	D3Ertd751e
0.6566	2.555	0.04392	Rhoc
-1.045	0.806	0.04397	Cldn12
-0.8741	2.472	0.04408	2610042L04Rik
-0.2829	5.926	0.04408	Twf2
2.411	3.629	0.04416	Ccl3
-0.2837	6.247	0.04417	Sdha
-0.6932	2.163	0.04417	Mir100hg
-0.9994	1.746	0.04417	Msr1
0.3379	5.336	0.04419	Inpp5a
-0.7043	3.326	0.0443	Use1
0.9783	2.593	0.04442	Gm41611
-0.575	3.864	0.04443	Syne1
1.296	0.5754	0.04444	Hspa2
0.4653	8.429	0.04449	Cdh23
0.4215	4.756	0.04449	Tlr1
-0.3402	6.085	0.04449	Iffo1
0.8175	3.758	0.04449	A930007I19Rik
0.5571	3.655	0.04449	Pola2
0.2502	8.094	0.04449	Grb2
0.3943	5.299	0.04449	Smc5
1.399	0.2471	0.04449	Ccdc40
-0.5399	3.547	0.04455	Zfp53
1.107	5.603	0.04472	Lypd6
-0.3942	5.317	0.04472	Cwc15
-0.7271	1.847	0.04472	Septin4
1.105	3.637	0.04479	Serpine1
-0.3586	5.126	0.04481	Cyb5b
-0.3918	5.124	0.04491	Akt2
0.4054	9.339	0.04496	Ttc28
-0.9257	0.9963	0.04496	Slc25a47
-0.2856	5.95	0.04512	Msl1
-0.6735	2.27	0.04524	E130311K13Rik
-0.651	2.637	0.04524	Gja1
-1.517	2.479	0.04536	Treml2
0.3026	8.04	0.04549	Adgre1
1.136	2.609	0.04551	Snhg1
-0.5049	5.346	0.04561	Cct3
0.3728	5.515	0.04561	Napa
0.9987	1.718	0.04574	Bex3
-0.5522	2.911	0.04574	Zfpl1
0.3853	8.713	0.04593	Lims1
-0.2774	6.707	0.04606	Nfix
0.3176	5.802	0.04606	Unk
-0.9614	1.459	0.04606	Map1b
-0.3874	5.365	0.04606	Aup1
1.073	4.049	0.04606	4933421O10Rik
2.414	2.38	0.04606	Gm13391
0.822	2.177	0.04606	Tmem116
0.6053	6.854	0.04606	Eya4
-0.9037	2.391	0.04606	Tmem254
-1.264	0.27	0.04606	Ncald
-0.7004	11.18	0.04623	mt-Rnr1
-0.5449	8.39	0.04623	Itga9
0.296	6.732	0.04623	Memo1
-0.4928	3.506	0.04623	Nek3
0.3699	5.668	0.04623	Ppp1r2
0.2901	7.088	0.04623	Hs2st1
1.034	0.6748	0.04623	1700001K23Rik
0.3934	6.587	0.04623	Clec16a
-0.5939	4.104	0.04623	Rad23a
-0.8239	2.531	0.04627	Mettl1
0.2928	8.996	0.04627	Skap2
0.3056	6.285	0.04631	Rab3gap2
1.01	1.362	0.04631	Snhg15
-0.4592	4.932	0.04631	Mettl7a1
0.3414	5.181	0.04636	Morrbid
0.6218	2.854	0.04641	Cand2
-0.519	2.745	0.04648	Gtpbp3
-0.3516	5.785	0.04663	Cct4
-0.2772	7.604	0.04667	Prrc2a
1.164	2.71	0.04667	ENSMUSG00000120869
0.658	4.448	0.04681	Atp8b1
1.813	1.011	0.04681	B3gnt7
1.295	4.201	0.04685	Gm37168
-0.2999	5.289	0.04687	Vezf1
-1.176	1.285	0.04693	Cav2
1.235	3.34	0.04696	Osm
0.734	2.23	0.04696	Tex30
-0.3919	5.515	0.04697	Ltc4s
-0.4447	3.785	0.04697	Rnf5
0.4355	8.604	0.047	Apba1
0.4257	4.442	0.04717	Glcci1
-0.3053	5.961	0.04743	Bnip3l
1.436	0.5117	0.04743	Itgad
-0.8723	2.793	0.04749	Lgi4
0.4105	5.881	0.04766	Plekhm2
-0.4333	6.957	0.04771	Trpm2
-0.4531	4.579	0.04778	Dynlrb1
0.367	5.677	0.04778	Shb
-0.5783	2.511	0.04778	Ercc1
-0.5653	17.35	0.04778	Rn18s-rs5
0.9166	1.45	0.04778	Cd44
0.3266	8.469	0.04781	Phf14
-0.8781	1.845	0.04787	Klf9
-0.4074	4.48	0.04808	Usp21
0.8897	5.574	0.04811	Bcl2a1b
0.2767	7.696	0.04811	Daglb
1.369	0.2147	0.04811	ENSMUSG00000119947
-0.5973	3.557	0.04827	Gm34408
0.4659	3.372	0.04841	Ccdc157
0.5151	7.09	0.04855	Nlrp1c-ps - ENSMUSG00000092528
2.008	3.692	0.04875	Klf2
0.3982	7.461	0.04876	Prkch
1.256	3.622	0.04884	Gm44710
-0.2942	6.405	0.04885	Tfe3
1.038	0.7054	0.04893	AA465934
-0.2894	6.92	0.04893	Ap1b1
-0.3076	8.299	0.04893	Mylip
0.3175	5.915	0.04901	Dnm1l
0.3851	4.869	0.04902	Eipr1
0.3583	6.062	0.04902	Rbpms
-0.3142	5.466	0.04902	Alkbh5
-0.403	5.425	0.04902	Ndst1
0.3277	7.297	0.04903	Rapgef6
2.299	-0.02639	0.04911	Sh2d1b1
1.09	0.1843	0.04911	Etaa1os
1.195	2.176	0.04911	Mcm5
1.865	0.9179	0.04913	ENSMUSG00000120387
0.4817	3.653	0.04939	Tmem156
-0.4569	3.523	0.0495	Mtif3
-0.299	6.78	0.0495	Rc3h1
-1.664	1.03	0.0495	ENSMUSG00000121092
-0.3883	3.796	0.0495	Ttbk2
0.2699	8.033	0.0495	Tbl1x
-0.5041	3.427	0.0495	Ndufb3
-0.3884	6.158	0.0495	Pacc1
0.6665	3.062	0.0495	Brca2
-0.565	5.352	0.04959	Mrc2
0.5123	4.117	0.04966	Nasp
-0.4067	7.673	0.04966	Pld4
0.8682	6.367	0.04966	ENSMUSG00000120580
1.211	1.704	0.04966	Gm9484
0.6188	3.359	0.04976	Trmt10a
0.3139	5.616	0.04977	Gfpt1
-1.109	1.89	0.04982	Fam107a
-0.361	4.541	0.04982	Deptor
1.359	0.2908	0.04994	Gm28809
0.9031	1.343	0.04994	Catip
-0.4392	4.535	0.05007	Psd3
0.5775	3.04	0.05018	Atad5
-0.352	7.085	0.05018	Sipa1
0.3517	8.35	0.05018	Smad3
-0.773	2.385	0.05018	Gm26910
-0.7454	3.803	0.05025	Ccdc61
-0.8261	3.047	0.05025	Oscp1
0.3026	6.185	0.05025	Sil1
0.4057	4.231	0.05026	Enoph1
-0.4724	4.333	0.05037	Retreg2
0.7001	2.957	0.05046	Cnn2
0.4118	4.177	0.05055	Gm16599
-0.9161	1.01	0.05055	Gm48742
0.3331	4.918	0.05055	N4bp2
-0.4673	3.179	0.05055	Rpap3
0.3915	6.593	0.05057	Tent5c
-0.5277	3.173	0.05058	Snx15
-0.566	3.908	0.05058	Prelid1
-0.3984	3.941	0.05058	Chst12
1.733	0.7455	0.05058	ENSMUSG00000120430
-0.721	2.278	0.0508	Gm20422
0.4306	5.51	0.05096	Tbc1d10a
0.6967	2.358	0.05098	Relt
0.3252	6.804	0.05102	Arhgef11
-0.4339	4.236	0.05117	Srprb
-0.4868	4.082	0.05117	Gm28035
-0.9741	0.8578	0.05117	Gm27010
0.3403	5.251	0.05131	Mospd2
-0.3646	4.943	0.05131	Sptlc1
-0.6263	2.826	0.05143	4931414P19Rik
0.3215	7.763	0.05143	Zfp407
1.25	0.9579	0.05143	Meig1
1.248	0.4681	0.05143	Gm5547
0.7045	4.849	0.05143	Casp4
0.338	13.65	0.05143	Malat1
1.31	4.119	0.05143	Ptchd1
-2.767	4.328	0.05181	Abcc1
1.086	2.091	0.05186	Crppa
-0.509	4.2	0.05191	Eif1b
0.3932	5.141	0.05192	Ppm1f
0.6041	3.295	0.05192	Capg
-0.573	3.235	0.05192	Ntng2
0.2854	6.222	0.05214	Ube2w
-0.4936	4.292	0.05215	Fkbp9
1.343	1.192	0.05215	Cd200r4
0.4686	4.724	0.05215	Clcn6
1.276	0.8268	0.05218	Gm34907
-1.1	0.5974	0.05228	Ndrg1
0.3968	5.085	0.05228	Pde7a
-0.3308	5.196	0.05243	Rora
0.9733	1.748	0.05269	0610009L18Rik
0.4297	4.113	0.05269	Lrrc75a
-0.4526	4.033	0.05281	Snrnp27
1.176	2.639	0.05281	Ube2s
1.587	1.036	0.05281	Ccl2
0.6299	3.507	0.053	Dync2i1
-0.5503	3.078	0.05305	Ptprd
0.3096	6.343	0.05305	Gxylt1
-0.5455	4.098	0.05305	Dhrs7
0.3463	6.305	0.05308	Pkp4
0.5815	2.535	0.05308	Nlrp1c-ps - ENSMUSG00000121474
0.3136	6.968	0.05351	Mapre2
1.345	4.304	0.05351	H2-Q4
0.4747	3.762	0.05351	Syngap1
0.35	7.558	0.05351	Sppl3
0.7329	8.225	0.05355	Arhgap24
-0.8015	7.129	0.05355	Rpl13a
-0.7478	2.402	0.05369	Slamf1
-0.3159	5.611	0.05369	Rbms1
0.381	5.521	0.05369	Mrps9
0.7195	1.951	0.05372	4931428F04Rik
0.3607	5.889	0.05385	Pik3r6
0.3037	7.974	0.05385	Fars2
0.4131	6.054	0.05385	Hnrnpa1
0.2903	5.08	0.05392	Trak2
-1.658	4.518	0.05392	Ccdc192
-0.4442	4.406	0.05392	Mak16
0.3895	4.18	0.054	Bag3
-1.163	1.004	0.054	ENSMUSG00000120859
-0.713	2.937	0.05406	Gm13031
0.424	4.039	0.05408	Lin9
-0.3233	10.28	0.05413	Serinc3
-0.2552	6.246	0.05413	Zbtb7a
0.6807	1.929	0.05413	ENSMUSG00000120924
-1.37	0.3912	0.05424	Cldn11
0.2665	6.704	0.05431	Atxn10
-0.5372	2.64	0.05431	Ino80b
0.8293	3.596	0.05436	Gm20186
0.4639	5.623	0.05462	Nudt4
-0.5592	3.795	0.05475	Gtf3c6
0.4479	3.807	0.05486	Ints2
-1.688	0.7901	0.05501	Siglec1
-1.518	3.18	0.05511	Gm4951
-0.4771	3.821	0.05519	F830045P16Rik
-0.4433	4.342	0.05524	Fam32a
0.4027	4.828	0.05527	Dnajb1
0.9234	0.9987	0.05531	ENSMUSG00000121399
0.6317	4.895	0.05532	Arap2
0.2527	7.742	0.05557	Ppp2r5c
0.5882	3.561	0.05559	Slc16a1
0.3126	8.11	0.05559	Babam2
-0.3098	4.789	0.05559	Insig2
0.7178	5.542	0.05559	Adrb2
-0.3173	5.693	0.05559	Arl8a
-0.9256	0.8211	0.05568	Cxcl17
0.7026	2.551	0.05568	Insig1
-0.3433	4.271	0.05568	Cog1
0.3279	7.819	0.05574	Tcf7l2
0.7777	2.536	0.05574	ENSMUSG00000121168
0.3701	3.868	0.05576	Alg13
-0.2898	5.366	0.05576	Nus1
-0.3358	4.926	0.05599	Vamp8
-0.8812	1.575	0.05604	Marveld2
0.3267	4.997	0.05604	Gm37240
0.3108	7.032	0.05615	Hnrnph1
-0.6248	4.77	0.0562	Acadl
-0.4377	3.486	0.05633	Cox20
0.3634	7.538	0.05633	Smg6
0.3151	5.841	0.05649	Ern1
0.7779	2.492	0.05653	Rab4a
-0.5953	3.049	0.05653	Rpl37rt
-0.266	5.778	0.05667	Cep120
0.3113	8.745	0.05677	Arid1b
-0.4783	3.526	0.05703	Chmp6
-0.6479	2.433	0.05708	Repin1
-0.5487	2.592	0.0572	Zfp414
-0.6343	2.541	0.05722	Plag1
-0.6266	3.218	0.05722	Ears2
0.6862	5.184	0.05723	Nfkbia
-0.353	6.916	0.05723	Tle3
1.002	1.287	0.05733	5730405O15Rik
-0.5349	5.449	0.05752	Selenos
-0.2974	7.036	0.05753	Nars
0.6979	3.717	0.05753	Cd274
-0.4052	5.894	0.05753	Itpripl1
1.048	3.769	0.05763	Igfbp4
0.4901	6.28	0.05765	Nlrp3
-0.3946	4.265	0.05767	Lmo4
-0.3911	3.764	0.05767	Zmat5
-0.5558	3.349	0.05775	Plcb1
-0.5752	3.736	0.05784	Acaa1a
-0.8783	1.217	0.05784	Pigz
-0.6489	2.312	0.05784	Gm16279
0.5767	3.973	0.05784	2610020C07Rik
-0.3217	5.779	0.05795	Rnf44
0.3451	5.646	0.05803	Hhex
0.2981	6.984	0.05808	Pmp22
2.317	3.482	0.05808	ENSMUSG00000121207
-0.5191	4.118	0.05812	Tbcb
-1.131	0.3798	0.0584	Tmem47
0.6993	2.627	0.0585	Fam171a1
-0.7864	3.473	0.05856	Elavl4
0.7626	2.016	0.05913	ENSMUSG00000121178
0.402	8.216	0.05914	Gnas
-0.7277	4.488	0.05917	Gm48614
-0.9612	1.551	0.05919	Gm11368
-0.5927	2.562	0.05933	Proser3
0.3039	9.11	0.05942	Dennd4a
-0.6203	2.561	0.05942	Ift122
0.5457	3.518	0.0595	Mical1
-0.4587	3.089	0.05951	Dnai4
-1.063	1.814	0.05951	Ptgds
-0.314	4.786	0.05951	0610030E20Rik
0.3285	4.327	0.05957	Bcl7a
0.3763	4.655	0.05957	Ap5m1
-4.016	0.3445	0.05957	Cd163
-0.3964	4.531	0.05957	Nop2
-1.311	0.5454	0.05972	Peg3
-0.3864	4.382	0.05997	Dbt
-0.5071	3.496	0.05997	Ramac
0.3571	6.507	0.05999	Slc44a2
-0.5149	3.845	0.06003	Ndufb9
-0.4128	3.614	0.06025	Slc4a4
-0.394	4.561	0.0604	Snrpb2
0.9855	1.828	0.06049	Hells
0.7255	2.59	0.06056	ENSMUSG00000121114
0.3273	5.235	0.06056	Hpf1
-0.6709	2.509	0.06075	Lsm3
-0.4273	3.364	0.06076	Cryba4
0.4847	4.158	0.06096	P2ry10b
-0.2865	6.52	0.06096	Reep5
-0.7061	2.259	0.06096	Gm38843
-0.7624	3.32	0.06096	Raph1
-0.5602	3.417	0.06101	Lamtor2
-0.6981	2.179	0.06101	Ppp1r26
-0.3028	5.991	0.06102	Pttg1ip
0.4751	6.25	0.06115	Fads1
0.7909	2.523	0.06119	A630072M18Rik
0.6529	5.328	0.06119	Arrdc3
-0.3033	5.174	0.06119	Wbp11
0.5559	6.528	0.06134	Arsg
-0.4519	3.983	0.06149	Tnfsfm13
1.146	2.117	0.06155	Pdcd1
1.766	2.859	0.06155	ENSMUSG00000120030
-0.3078	4.998	0.06157	Sympk
-0.3824	9.835	0.06158	Entpd1
-1.393	0.5657	0.06158	Steap3
-1.288	0.2686	0.06158	Gjc3
0.8333	3.054	0.06163	Arl5c
-0.2571	6.502	0.06171	Yy1
-0.8626	1.229	0.06176	Gm31508
0.2537	10.79	0.06176	Macf1
-0.3913	3.981	0.06195	Zfp955b
-0.8179	1.499	0.06203	Gria2
-0.3068	5.375	0.06205	1110019D14Rik
0.8154	6.36	0.06207	Cux2
0.3335	8.837	0.06208	Pitpnc1
2.82	1.063	0.06231	Tamalin
-0.8173	4.091	0.06233	Slamf9
-0.4383	3.444	0.06241	Bsn
-0.5112	3.287	0.06247	Slc25a27
-0.3051	5.759	0.06248	Klhl9
0.5124	3.143	0.06256	Gvin1
-0.3054	4.618	0.06256	Txndc9
-0.3993	5.372	0.06263	Gm38666
-0.2944	8.395	0.06263	Cd33
0.3835	4.123	0.06269	Unc5c
0.2501	8.302	0.06269	Cd53
0.32	8.426	0.06269	Med13l
-0.2869	6.822	0.0628	Sel1l
-0.2978	4.716	0.06282	Tmtc3
-0.4588	4.023	0.06317	Fra10ac1
-0.9773	0.9372	0.06323	Map1a
-0.2538	7.154	0.06333	Comt
-0.4057	9.236	0.06333	Agmo
-0.9306	0.8578	0.06333	Gprc5b
1.179	1.106	0.06353	Prim1
-0.6548	2.305	0.06353	Gm13778
0.5172	4.11	0.06367	Nfkbie
0.2831	5.548	0.06367	Tmem50b
0.3647	4.7	0.06367	Fbxo33
0.7821	1.976	0.06367	6330537M06Rik
-2.197	4.729	0.06369	Kitl
-0.3492	5.713	0.06374	Mllt3
-0.3214	5.171	0.06389	Rest
0.3092	7.206	0.06389	Taf15
-0.8061	0.9481	0.06389	Tek
0.9999	2.508	0.0641	D730003I15Rik
-0.487	3.313	0.06419	4930549G23Rik
0.5275	4.135	0.06419	Topbp1
0.9635	0.922	0.06419	Gm50250
-0.3594	5.029	0.06419	Arhgap26 - ENSMUSG00000036452
-0.4984	6.456	0.0642	Pdia4
-0.8969	8.352	0.06436	Prkce
0.2638	6.004	0.06455	Stk38
-0.5601	3.185	0.06455	Sccpdh
1.468	3.485	0.06455	Gm8091
-0.8026	3.793	0.06457	Bahcc1
0.2629	7.944	0.06479	Skil
0.8193	3.268	0.06479	Mcm6
-0.7762	4.469	0.06479	Mb21d2
1.813	0.5936	0.06479	ENSMUSG00000120101
-0.68	2.81	0.06491	Nt5c
-0.5962	3.556	0.06491	Ndufa2
1.001	1.741	0.06512	Lhfpl4
0.3042	6.86	0.06514	Zc3h7a
0.509	4.175	0.06519	Tiparp
-0.3246	4.561	0.06519	Actr8
0.4722	5.162	0.06519	Ddx60
-0.3115	5.415	0.06533	Pcmtd2
-0.5667	2.801	0.06573	Rex1bd
-0.313	6.403	0.06577	Hsd17b4
0.512	4.222	0.06584	Pyroxd2
-0.4299	4.906	0.06588	Smg9
-1.048	0.8076	0.06595	Poll
-0.6755	2.551	0.06595	Maip1
-0.3889	3.723	0.06595	Zfp619
1.374	0.7632	0.06595	Gm4285
-0.3346	5.198	0.06597	Ddrgk1
0.3318	6.293	0.06638	Vps37b
-0.7593	1.643	0.06642	Zfp85os
0.292	7.321	0.06656	Smurf1
0.3584	6.235	0.06665	Prpf39
-1.381	3.548	0.06669	ENSMUSG00000120076
-0.4423	5.103	0.06669	Emc7
0.8953	1.245	0.06669	Ccnd2
0.2949	6.924	0.06669	Abcg1
0.3247	9.282	0.06669	Smyd3
0.3377	5.365	0.06669	Nfxl1
0.466	3.856	0.06669	Cnr2
0.3962	3.867	0.06669	Kctd5
1.468	0.09978	0.06687	ENSMUSG00000120049
-0.3939	4.469	0.06715	Dhx34
0.4702	4.476	0.06722	ENSMUSG00000120081
-0.6017	2.519	0.06727	Cdkn1c
0.952	3.272	0.06727	D630045J12Rik
0.2773	9.214	0.06729	Fbxl17
0.6439	2.818	0.06729	Gm9320
1.114	0.4995	0.06741	Gm42917
0.6681	2.505	0.06741	Adgb
-0.2584	7.997	0.06741	Tlr7
-0.3543	4.013	0.06751	Zfp617
-0.9518	6.371	0.06751	Rps29
-0.319	7.048	0.06751	Zfp36l2
2.094	1.739	0.06755	Gm5420
1.052	0.6271	0.0677	ENSMUSG00000120036
0.2964	8.394	0.06772	Phf21a
-0.9961	6.725	0.06772	Rps23
-0.8154	5.426	0.06772	Rpl34
-1.306	1.612	0.06772	Ppdpf
2.407	2.821	0.06772	Adamts1
-0.4161	4.788	0.06783	Cstf2t
0.7096	1.744	0.06791	Nfil3
-0.826	1.45	0.06803	Mrpl53
0.5598	2.906	0.06803	Haus7
-1.242	0.297	0.06806	Gm9794
0.3496	8.887	0.06816	Rasgrp3
0.3878	6.604	0.06833	Cep85l
0.2342	7.676	0.06841	Stx7
-0.7483	1.23	0.0685	Tubb4a
2.495	3.779	0.0685	Dusp1
1.004	0.8722	0.06857	2700038G22Rik
-0.7211	1.755	0.06864	Gprasp2
0.5558	6.307	0.06872	Tbc1d4
0.9568	0.9184	0.06885	Neil2
2.279	3.32	0.06899	Gem
-1.136	1.096	0.06919	Rxrg
-1.164	0.5063	0.06924	Gm13270
0.5889	3.019	0.06924	ENSMUSG00000121479
1.925	0.1917	0.06926	Gm38560
-0.4035	5.256	0.06926	2810403D21Rik
-0.2881	5.362	0.06926	Auh
-0.8782	0.91	0.06943	Rps27rt
-0.4898	3.539	0.06947	Ufc1
-0.3358	5.676	0.0695	Dtx3l
0.3334	6.369	0.06957	Dock9
-0.3958	4.31	0.06957	Maf1
0.7891	6.45	0.06957	Bcl2
-0.5094	2.677	0.06957	Borcs6
-0.2515	6.524	0.06957	Lrrc58
0.3546	6.351	0.06981	Lrp12
1.084	0.2857	0.06981	Slc9a5
1.212	0.672	0.06981	Rspo1
-0.307	4.702	0.06999	Brd9
-0.6041	4.468	0.06999	Fyn
0.3498	5.275	0.06999	Pcbd2
0.2839	7.286	0.07008	Ifnar2
0.2767	8.319	0.0701	Extl3
-0.4367	3.014	0.07023	Miip
-0.4281	3.515	0.07024	Serinc5
0.2724	7.517	0.07027	Ubac2
0.3097	7.12	0.07027	Psme4
0.4734	4.251	0.07027	Gm42962
0.6092	2.832	0.07027	Spata7
1.177	1.263	0.07027	Ubxn11
0.3108	8.595	0.07027	Tbc1d22a
0.3164	5.04	0.0706	Arntl
-0.6449	2.805	0.07065	St3gal1
-0.6225	3.236	0.07066	Rell1
0.4752	4.536	0.07066	Lrrc28
1.081	1.817	0.07067	Cage1
-1.379	5.811	0.07067	I830077J02Rik
-0.3116	5.141	0.07067	Exosc10
0.2677	7.97	0.07088	Smarca2
0.4768	6.173	0.071	Atp6v1a
-0.2828	6.228	0.07101	Ppig
2.3	0.4797	0.07138	Gm28707
0.2814	5.441	0.07138	Exoc1
0.5117	5.684	0.07148	Rras2
1.255	3.327	0.07156	ENSMUSG00000120024
0.303	5.425	0.07156	Galnt12
0.4203	3.38	0.07159	Rmc1
-0.4655	3.978	0.07159	Cpox
-0.7742	1.981	0.07159	Rdm1
0.8705	0.8097	0.07159	Gm49396
-0.2749	9.948	0.07159	Vsir
-0.6633	5.928	0.07179	Rpl22
0.7333	1.127	0.07179	Trim13
-0.7459	2.029	0.07179	Gm15608
-0.3861	4.299	0.07179	Rexo2
0.4423	4.815	0.07179	Gm46367
0.2359	8.634	0.07227	Oxr1
0.4887	2.906	0.0725	Cdk5
-0.9614	6.883	0.07256	Rplp1
0.4198	4.164	0.07281	Slc8b1
-0.4001	4.265	0.07294	Scrn3
-0.5465	2.559	0.07301	C1rl
-0.4708	3.618	0.07301	Arf5
-0.4764	3.538	0.07312	Smpd1
0.3084	8.121	0.07312	Rbm25
0.4519	4.578	0.07312	Nars2
0.3066	4.322	0.07329	Szt2
0.3126	6.94	0.07329	Tsc22d2
0.3295	7.797	0.07329	Ints6l
-0.4363	3.568	0.07329	Cbr1
0.3369	5.408	0.07329	Paxbp1
0.3128	5.562	0.07343	Icosl
0.2684	7.194	0.07348	Slc23a2
-0.5476	4.038	0.07375	Cox17
0.2927	5	0.07375	Uba7
-2.08	5.11	0.07375	C5ar2
-1.222	0.3235	0.0741	Glp2r
0.285	4.922	0.0741	Tm7sf3
0.4526	5.728	0.0741	Hivep2
-0.5514	3.333	0.07414	BC065397
-0.3508	6.651	0.07416	Kcnk6
0.2841	9.181	0.07441	Ski
-0.2874	8.635	0.07453	Sipa1l2
-0.7522	1.419	0.07454	Grhpr
0.9818	1.525	0.07454	Sertad1
0.8128	1.462	0.07464	Gm14546
-0.3769	4.823	0.07464	Vps36
0.8776	3.008	0.07464	Gch1
-0.4081	4.347	0.07464	Cnp
0.4066	3.379	0.07481	Hmces
0.3068	5.334	0.07498	Disp1
0.5076	3.115	0.07498	Capn2
0.3437	6.623	0.07518	Rubcnl
-0.3848	4.545	0.07518	Cdc26
0.4148	4.248	0.07518	Lamtor3
0.3612	9.738	0.07518	Prkcb
-0.3906	6.291	0.07518	Lyzl4
-0.9817	0.7153	0.07518	Nrg2
-0.5267	2.98	0.07527	Ccdc32
0.2923	9.346	0.07527	Jmjd1c
1.123	0.345	0.07529	Clec1b
-0.9666	0.6501	0.07529	Cryab
0.396	5.363	0.07529	Asah2
-0.2527	9.556	0.07529	Lpcat2
-0.5065	3.84	0.07529	Prmt5
-1.209	1.028	0.07529	Mmp15
-1.229	1.179	0.07544	Ccr1
0.2918	6.442	0.07544	Htt
0.292	6.166	0.07554	St3gal2
1.065	0.9453	0.07558	Dennd2d
1.057	1.18	0.07558	ENSMUSG00000120322
-0.4968	2.783	0.07558	Borcs8
-0.281	4.927	0.07558	Nectin4
0.4091	4.393	0.07558	Zswim5
-0.4386	4.479	0.07565	Bpnt2
0.5366	2.5	0.07576	Gins1
-0.4435	3.294	0.0758	Abtb1
-0.4357	3.514	0.07592	Zfp319
0.6119	3.627	0.07592	Gpr35
0.2748	9.293	0.07605	Tbxas1
0.3142	4.894	0.07623	Zfp131
-0.3626	4.027	0.07623	Gm20342
-0.3188	6.408	0.07623	Ppp1r18
-0.4081	4.629	0.07654	Gps2
0.5953	2.055	0.07654	Tex9
-0.4749	5.608	0.07656	H2bc6
0.2603	7.766	0.07666	Dyrk1a
0.281	6.507	0.0767	Brwd1
0.9429	0.5965	0.0767	Gm49417
1.006	3.006	0.0769	Optn
-0.5015	3.517	0.0769	Tnfsf12
0.9075	5.93	0.0769	Gcnt2
0.2628	5.832	0.07704	Ccnl2
-0.3087	4.412	0.07704	Jade1
0.2941	8.3	0.07708	Wdfy4
-0.433	4.1	0.07711	Trmt6
-0.3776	3.838	0.07718	Gm46430
1.262	0.2237	0.07736	Gm2479
1.278	5.181	0.07736	Lrguk
-0.3252	4.99	0.07738	Kdelr1
-0.7518	1.936	0.07754	Zfp455
-0.3278	6.733	0.07754	Jade2
0.2842	5.917	0.07755	Ccng2
-0.4655	3.595	0.0776	Msmo1
-0.9599	1.661	0.07763	Rac3
-0.7145	1.651	0.07763	Ocln
-0.4327	4.758	0.07773	Gm7240
0.3119	6.309	0.0778	Cyth1
0.3355	4.379	0.07803	Aifm1
0.7523	1.466	0.07819	Gm37008
-0.4716	4.989	0.07819	Psme2
-0.8494	2.131	0.07841	Rrp9
0.2441	5.942	0.07841	Cep192
-0.3848	3.784	0.07857	Mpc2
0.8205	2.172	0.07859	Hspb3
1.253	1.598	0.07859	2310010J17Rik
0.3272	5.597	0.07878	Rassf8
0.4916	5.689	0.07878	Rnaset2a
1.323	0.5195	0.07878	ENSMUSG00000120147
-0.897	2.118	0.07878	2610005L07Rik - ENSMUSG00000071793
-0.8375	0.5431	0.07878	Gm13421
-0.4606	3.513	0.07878	Zfp709
-0.4725	5.706	0.07878	Tmco1
0.4123	4.578	0.07886	Zdhhc13
1.535	3.812	0.07886	Socs3
0.3949	4.863	0.07906	Sh3bp5
-0.3693	3.676	0.07916	Ptcd2
-0.285	9.152	0.07916	Ivns1abp
0.2422	6.227	0.07972	Ppm1b
0.2362	7.4	0.07973	Snrnp70
-0.2302	6.161	0.07973	Pura
-0.2838	6.316	0.07992	Csad
1.103	0.7454	0.08005	Gm47863
-0.6994	1.611	0.08005	Tle2
0.3072	4.835	0.08032	Ube3b
-0.3028	7.399	0.08039	Nfatc2
-0.5389	3.839	0.08039	Gbp5
0.2688	4.779	0.08049	Dhx32
0.5952	4.651	0.0807	Gm11613
0.2573	6.054	0.08082	Crybg3
0.2784	5.216	0.08089	Ift172
0.2824	7.957	0.08089	Rab31
-0.4646	10.18	0.0811	Selplg
-2.445	-0.2913	0.08114	Map7d3
-0.282	7.299	0.08114	Sft2d2
-0.2885	5.24	0.08114	Psmc3
0.3706	4.963	0.08131	Tpcn2
-0.5441	2.154	0.08131	Zfp791
-0.4038	3.62	0.08131	Trim39
0.3434	4.574	0.08131	Osgep
-0.4324	3.438	0.08135	Zfp87
-0.2846	6.983	0.0816	Spacdr
0.2673	5.881	0.08164	Rragc
-0.2885	4.894	0.08164	Stxbp1
0.2866	7.392	0.08169	Phkb
-0.2306	6.217	0.08178	Rprd2
-0.5996	1.91	0.08183	Nckap1
-0.4823	3.137	0.08183	Klhl42
0.3892	4.905	0.08183	Nxt2
0.3331	5.781	0.08183	Camk2g
-0.3494	4.803	0.08183	Fnta
0.3587	3.887	0.08183	Glce
-0.6873	8.575	0.08224	Hsp90ab1
-0.2349	6.86	0.08226	Pcdhgb2
-0.5033	3.085	0.08227	Tulp3
0.8858	1.983	0.08227	Gm32552
0.6714	5.614	0.08227	Furin
-0.3341	4.453	0.08227	Suclg1
1.004	3.94	0.08227	ENSMUSG00000121395
-0.2854	5.742	0.08234	Ypel3
0.4901	2.666	0.08234	Ehhadh
-0.5789	3.948	0.0824	Eid1
0.2712	7.341	0.08243	Susd6
-0.4177	3.01	0.08243	Mettl2
0.3326	5.639	0.08243	Mtf2
0.4273	4.213	0.08243	Tsen2
0.3247	7.224	0.08243	Smurf2
-0.3186	7.918	0.08245	Ywhah
-0.3233	4.702	0.08253	Rnh1
0.2851	7.587	0.08257	Rai1
-0.3509	4.642	0.08257	Dtd1
0.4788	3.533	0.08259	Zfand2a
0.4587	3.373	0.08271	Pdgfa
-0.3703	3.72	0.08271	Mon1b
-0.809	6.664	0.08273	Fau
-0.5854	2.895	0.08273	Micos13
-0.7649	6.255	0.0828	Rps24
0.5846	8.26	0.08288	Nos1ap
0.3006	6.203	0.08289	Uri1
0.4592	3.651	0.08289	Sv2a
0.8415	1.508	0.08307	Gm50211
-0.8106	1.306	0.08308	Gbp8
0.4495	5.986	0.0831	Anapc15
-0.8643	0.9952	0.08312	Egfr
-0.3716	4.225	0.08315	Cbll1
-0.2746	6.868	0.08315	Il21r
0.7073	2.171	0.08318	F730043M19Rik
0.9891	0.8618	0.08318	Catsper3
-0.2569	6.1	0.08326	Camta2
-0.2843	6.525	0.08329	Ptafr
0.3494	5.721	0.08329	Med14
1	1.393	0.08329	Cytip
-0.395	4.423	0.08334	Ahsa2
0.6531	2.384	0.08341	Cbwd1
0.4004	4.062	0.08342	Vcl
-0.5841	2.879	0.08348	Eif4ebp1
0.3417	6.812	0.08348	Abcc5
-0.2417	5.99	0.0835	Brk1
-0.4198	4.056	0.08359	Zbed5-ps
-0.499	3.554	0.0836	Pdcd5
0.2624	6.642	0.08364	Rngtt
-0.6582	2.389	0.08364	Prnp
0.6703	2.231	0.08365	Ptrhd1
-0.3445	6.687	0.08387	Dnajc3
-0.2389	7.05	0.0839	Akna
0.2881	6.611	0.084	Atxn2
-0.5571	2.662	0.084	Ptprt
-0.8581	1.329	0.084	Nudt2
-0.5712	2.237	0.08403	Snrpd2
-0.4777	3.177	0.0844	Sash1
0.6232	3.266	0.08443	Tnik
0.7002	3.545	0.08458	Erc1
-0.9037	0.6748	0.08491	Gimap5
-0.4024	5.35	0.08492	Itpripl2
1.075	1.584	0.08492	Lilrb4b
0.5545	3.027	0.08511	Siah2
-0.3317	3.989	0.08511	Gnptg
-0.2451	6.5	0.08519	Map7d1
0.8928	2.409	0.0852	Eaf2
0.2353	5.754	0.08525	Mink1
0.2593	8.726	0.08525	Plcg2
-0.2244	7.72	0.08525	Hook3
0.2369	6.28	0.08525	Rcor1
-0.4508	4.83	0.08532	Foxn2
0.3332	5.977	0.08535	Rybp
0.9173	1.622	0.08535	H4c14
-0.5792	4.853	0.08535	Fam217b
2.608	4.25	0.08548	Fos
-0.6886	2.281	0.0855	Atp1b2
0.2741	7.199	0.08555	Stx8
0.2556	6.918	0.08579	Cdyl
0.264	7.906	0.08579	Tet3
0.5519	3.045	0.08581	Cycs
-0.4225	4.353	0.08583	Vps28
-0.3442	3.718	0.08584	Gtpbp8
-0.2664	5.201	0.08585	Dag1
0.3663	4.48	0.08585	Mov10
-0.6891	1.78	0.08608	Aqp4
0.3037	7.176	0.08612	Rps6ka5
1.108	3.042	0.08612	Fgr
-0.6889	1.941	0.08612	Pdzd4
0.2956	9.41	0.08617	Cacnb2
-0.3513	4.31	0.0863	Cgrrf1
0.6349	3.487	0.08631	Gm15964
0.3684	3.423	0.08639	Gvin2
-0.6387	2.17	0.08639	Ahnak
0.7971	2.551	0.08639	Gm39556
-0.4978	3.502	0.08639	Ift20
-0.2999	6.28	0.08639	N4bp2l1
0.424	3.905	0.08639	5330406M23Rik
-0.7338	0.8066	0.08639	Bloc1s1
-0.4126	3.242	0.08651	Mkks
0.3648	4.223	0.08651	Ttpal
0.6539	2.043	0.0867	ENSMUSG00000121189
-0.4109	4.56	0.0867	Atpif1
-0.9486	0.8109	0.08714	Adcy2
-0.6725	1.58	0.08714	Zfp108
0.243	7.057	0.08714	Ascc3
0.7697	1.416	0.08714	ENSMUSG00000120012
-0.4185	5.079	0.08767	Rer1
0.3273	6.901	0.08775	Acvr1
-0.368	3.578	0.08775	B3gat3
-0.2411	5.725	0.08778	Cdc5l
0.2585	10.36	0.08796	Dock2
-0.3877	4.103	0.08796	Zfp64
0.3239	7.757	0.08796	Fmnl2
-0.6425	2.02	0.08796	Rab34
0.5646	4.291	0.08802	Susd1
-0.5409	2.108	0.0884	Nhsl1
0.6658	1.429	0.08911	Bik
-0.6022	1.668	0.08912	Igsf11
0.3636	4.861	0.08912	Cmc1
-0.6263	2.317	0.08912	Coa6
0.8483	1.034	0.08912	Sycp2l
-0.3433	5.734	0.08938	Nhsl2
-0.7568	1.403	0.0895	Cbr3
0.2594	6.383	0.08976	Stk24
0.5833	2.952	0.08978	Hic2
-0.3105	4.404	0.08983	Mier3
-0.7207	1.45	0.08983	Zfp273
0.2553	5.496	0.08983	Iars2
-0.3719	8.196	0.08983	Trem2
0.3875	3.369	0.08989	Rabggtb
0.3571	4.053	0.08989	Mpp1
0.6637	2.021	0.08989	Gm14902
-0.2786	4.943	0.08989	Yipf5
1.196	0.7989	0.08989	Snhg4 - ENSMUSG00000117694
-0.2337	5.966	0.09003	Oip5os1
0.4533	4.383	0.09025	Rnf24
-0.4485	3.233	0.09025	Foxo4
0.2366	6.226	0.09025	Pspc1
-0.2975	5.358	0.09067	Ankrd40
-0.4409	3.935	0.09079	Cd46
0.27	6.504	0.09079	Cyth3
-0.8264	0.8452	0.09079	Dio2
-0.2242	7.991	0.0908	Notch2
-1.641	3.235	0.0908	Akr1e1
-0.3293	4.7	0.09085	Lbr
0.3842	8.085	0.09089	Rin2
0.2367	6.742	0.09093	Kpna3
-0.3785	3.531	0.09093	Slc50a1
-0.4548	4.126	0.09098	Tmtc2
-0.6772	2.547	0.09098	Dbndd2
-0.7364	1.867	0.09098	Abt1
0.4736	4.114	0.09099	Dclk2
-0.8441	6.48	0.0911	Rplp2
2.427	4.291	0.0911	Fosb
0.296	5.671	0.09121	Nin
-0.6517	2.576	0.09121	Cp
-0.5507	2.3	0.09129	Pam16
0.6729	1.771	0.09129	Fancd2
0.84	1.965	0.09129	ENSMUSG00000120371
0.4646	3.335	0.09137	Gm15283
-0.3885	4.258	0.09137	Layn
-0.3281	4.385	0.09137	Slc30a4
-0.5186	2.393	0.09137	Ebf1
0.4019	4.274	0.0914	Serac1
-0.2875	6.257	0.09171	Cebpa
-0.6722	4.412	0.09192	Rpl27
-0.4867	3.607	0.09206	Tsacc
0.3581	5.261	0.09206	B4galt5
0.2892	8.729	0.09206	Foxp1
0.4467	2.933	0.09225	Mtfmt
-0.6619	1.439	0.09225	Zfp954
-0.714	1.608	0.09225	Mex3a
0.8067	3.401	0.09238	Camk2b
-0.6059	2.007	0.09238	Lsm5
[truncated: 55,011 more rows]

## Sheet: DE-5_Microglia
logFC	AveExpr	p_val_adj	gene_names
-7.077	5.926	1.075e-10	Atp8a2
2.505	9.743	3.705e-09	Arsb
3.162	5.818	3.705e-09	Nme7
-4.467	3.205	1.484e-08	Gm43821
-5.518	2.542	2.808e-07	Mpp7
6.149	3.5	5.745e-07	Colec12
-1.803	6.017	1.036e-06	Gm45837
4.991	0.1151	1.305e-06	Ang4
-1.394	7.486	1.305e-06	F11r
2.522	4.688	2.299e-06	Qsox1
-1.985	4.29	4.006e-06	Ang
6.067	2.198	7.441e-06	Gnb4
-1.225	5.588	8.546e-06	Ecscr
-1.784	4.399	9.434e-06	Trps1
1.368	7.62	9.434e-06	Xpr1
2.094	5.006	1.61e-05	Sfmbt2
1.261	7.581	2.574e-05	Atg10
1.469	5.508	2.574e-05	Cmtm8
1.17	6.643	3.403e-05	Ipcef1
-1.498	4.11	3.638e-05	Zfp862-ps
1.004	7.444	4.415e-05	Rasal2
2.267	3.71	5.154e-05	Arhgap27os3
1.142	9.182	7.183e-05	Wwox
6.631	0.8758	7.216e-05	Gm49692
1.357	8.021	7.529e-05	Ssbp2
-1.303	4	9.006e-05	Nipal3
1.274	4.793	9.006e-05	Bzw2
0.8389	7.726	9.006e-05	Lpp
1.045	7.762	9.349e-05	Chst11
-1.636	3.306	9.349e-05	Rasgrf2
-5.217	0.6211	9.627e-05	Zfp125
2.049	3.855	0.0001132	Gm12610
-1.268	4.937	0.0001164	Zfp467
-1.466	3.792	0.0001207	Cep85
1.12	5.227	0.0001294	Zfp729a
-1.175	5.022	0.0001302	Smo
6.206	1.494	0.0001398	Cd36
1.673	5.953	0.0001544	Tom1l1
3.364	0.6819	0.0001589	Parpbp
1.917	3.441	0.0001589	Slamf8
0.8824	8.155	0.0001679	Peli2
-4.473	0.2958	0.0001967	Fgf2
3.228	2.057	0.0002006	Kcp
1.685	3.933	0.0002476	Cdk5rap1
-1.392	3.499	0.0003083	Nudt6
-2.492	2.7	0.0003092	Pde10a
-5.596	2.046	0.0003194	ENSMUSG00000121318
-3.359	0.6304	0.0003194	Zc2hc1a
-1.333	3.988	0.0003248	Abcg3
-0.8185	8.132	0.000349	Cd84
0.7142	8.837	0.000349	Cux1
4.083	1.206	0.000349	Adgrg5
1.206	5.702	0.0003597	Arhgap15
-3.08	1.325	0.000413	Pde2a
-1.404	3.722	0.000413	Acsf2
-3.202	0.6779	0.0004327	Naip3-ps1
3.603	-0.1589	0.000435	Scml2
4.14	0.893	0.0004395	Pcnx2
0.8263	6.298	0.0004395	Stau2
1.112	4.91	0.0004644	Stxbp4
0.8457	5.713	0.0004667	Tdrd3
1.099	6.43	0.0005399	Fggy
-1.279	4.076	0.0005622	Slc4a4
1.701	3.809	0.0005812	Masp1
-1.078	4.311	0.0005902	Tgfbi
-1.688	4.682	0.0005912	Rpl29
-0.6907	5.985	0.000614	B230219D22Rik
0.9348	9.262	0.000614	Klf12
-2.553	1.052	0.000614	C030034L19Rik
-0.9481	5.107	0.0006205	Arsk
1.215	4.876	0.0006402	Nod1
1.383	5.045	0.0006818	1700025G04Rik
1.557	4.105	0.0006877	Plekhh2
1.38	3.859	0.0007214	Rasgrp4
4.449	1.717	0.0007334	Actr3-ps
0.827	5.777	0.0007433	Plpp1
3.376	1.714	0.0007605	Gm12861
-0.9773	5.399	0.0007605	Mcur1
-2.691	0.7189	0.0007605	Igsf9
1.924	5.378	0.0008597	Ube2e2
4.93	4.298	0.0008716	Cd300lf
-0.8576	5.669	0.0008803	Rps2
-0.9954	3.996	0.0008847	Pink1
0.9028	8.555	0.0008847	Cables1
-0.9611	5.092	0.0009323	Fam3c
0.7109	7.254	0.0009367	Tspan7
0.8737	5.691	0.0009708	Wdfy1
0.709	6.236	0.0009708	Mapkapk2
-1.093	4.016	0.0009708	Cadm2
0.9944	5.95	0.001	Sfi1
2.495	1.165	0.001016	Atp6v0e2
0.8397	5.958	0.001063	Gm49342
0.7677	8.363	0.001063	Gna12
0.6536	8.002	0.001063	Kcnk13
-1.576	2.7	0.001069	Mdfi
-1.028	3.644	0.001082	Cryba4
0.7514	6.361	0.00114	Evi2
-1.185	4.78	0.001143	Cast
0.6147	7.432	0.001143	Atf6
-1.072	4.006	0.001143	Rcan3
-1.377	5.543	0.001154	Sh3bgrl3
-0.6723	7.045	0.001154	Zfp36l2
-1.402	4.316	0.001154	Rpph1
0.7625	4.895	0.001154	Pdia5
-1.166	3.073	0.001217	Ccdc28b
-2.64	0.9991	0.001232	Stpg1
-1.795	1.711	0.001256	Tmod2
1.194	8.606	0.001274	Hdac9
-1.078	3.913	0.001306	Ndufb10
-1.789	3.478	0.001316	Cyb5r1
0.8783	5.169	0.001368	Slc25a25
0.9123	9.316	0.00141	Cadm1
-1.335	3.509	0.00141	Ccnb1ip1
1.292	3.588	0.001473	Slc25a13
-1.341	4.133	0.001473	Gm54867
-1.128	3.506	0.001473	Olfml2b
1.454	2.938	0.001511	Spry1
2.843	-0.04828	0.001557	Cfap77
2.578	6.894	0.001557	Nrxn1
0.5785	7.952	0.001557	Tnfrsf21
1.025	5.684	0.001565	A330023F24Rik
-0.6544	6.249	0.001565	Il16
1.435	3.882	0.00157	Mafk
-2.771	0.2736	0.00161	Kcnk1
6.029	0.6898	0.00161	Pianp
0.7808	6.264	0.001631	Ahdc1
-2.337	0.8518	0.001744	Copz2
0.695	7.526	0.001744	Aim2
-0.6673	5.863	0.001744	Ide
1.01	4.141	0.001797	Ctdspl
-2.951	3.045	0.0018	Samd4
3.633	0.3212	0.001833	Gm14584
-1.002	3.599	0.001906	Ptprd
0.6703	8.688	0.001953	Zfand3
1.256	4.154	0.001961	Nectin2
0.6361	7.425	0.001971	Pacs1
2.191	2.123	0.002001	Plppr4
-2.631	0.6473	0.002033	Sec16b
0.6648	5.913	0.002033	Slc16a10
-0.6528	6.664	0.002033	Crybb1
0.7923	6.067	0.002033	Nova1
0.6418	6.016	0.002033	Cyria
-1.317	4.05	0.002033	Cpe
1.021	4.424	0.002033	Errfi1
-0.8854	4.014	0.002036	Eif3k
-1.479	2.027	0.00204	Tmem178b
-0.8933	4.104	0.002118	Zfp617
0.6493	7.36	0.002118	Slc15a3
2.473	2.187	0.002118	Unc5cl
-1.291	3.147	0.002134	Gm26782
-1.163	3.459	0.002143	Tmem37
-1.184	3.696	0.002187	Dbi
-4.214	0.212	0.002187	Ifi204
0.7099	7.181	0.002187	Mrtfa
1.107	7.207	0.002187	Akt3
0.8292	4.588	0.002434	Acaca
0.7374	5.628	0.002434	Tbc1d1
-1.63	3.829	0.002434	Clu
-1.1	3.693	0.002434	Mdga2
-1.065	5.534	0.002434	Rpl34
-0.8395	8.579	0.002439	Fcgr3
0.5179	7.222	0.002467	Clip1
0.9465	4.313	0.002575	Myh10
-1.669	2.705	0.002575	Trim30c
-1.206	3.278	0.002613	Ptn
0.6036	7.998	0.002613	Fus
-1.689	4.514	0.002613	S1pr1
1.642	4.286	0.002617	Gm10138
-0.8578	5.736	0.00265	Dusp7
0.5569	6.171	0.002712	Ipo9
1.095	3.59	0.002735	Ezh2
-1.059	2.995	0.002735	A430033K04Rik
0.6379	5.512	0.002877	Mta3
1.21	6.699	0.002979	Il1a
0.5972	7.159	0.002988	Setd3
1.072	4.118	0.002995	Slc66a1
-1.302	3.031	0.002995	Slc24a2
1.08	4.216	0.003004	Rtp4
-0.6637	5.177	0.003006	Trim36
0.6203	6.707	0.003007	Tspan13
-0.6433	5.51	0.003091	Stard8
-0.8734	4.972	0.003091	Nln
0.7598	9.911	0.003154	Rapgef5
0.6512	6.249	0.003154	Klhl6
0.6226	7.633	0.003327	Tec
-0.6635	5.21	0.003524	Ms4a6b
-1.392	2.464	0.003524	Aqp4
-2.314	0.5579	0.003544	Pcdh17
-0.7878	4.376	0.003544	Dhrs7
-0.9314	4.074	0.003597	Clcf1
-1.441	2.833	0.003614	Ndrg2
0.6221	9.261	0.003614	Gnaq
-1.764	1.542	0.003614	Nrxn2
0.739	7.489	0.003614	Sfmbt1
0.8977	6.02	0.003614	Rnls
-1.883	3.242	0.003733	Aldoc
-1.342	2.37	0.003787	Prdm16
0.9337	7.405	0.003838	Apbb2
-0.7428	5.266	0.003891	Rora
-0.6526	6.322	0.003942	Irf2bp2
-0.887	5.539	0.003943	Ablim1
-1.431	2.092	0.004012	Enah
0.6306	8.036	0.004012	Snx13
0.5665	8.8	0.004085	Rtn1
-1.384	2.566	0.004085	Trim9
-1.023	3.913	0.004085	Txndc17
0.6314	9.158	0.004085	Plek
-1.516	1.827	0.004105	Rac3
0.6171	6.413	0.004264	Usp6nl
0.5836	6.089	0.004293	Slc9a1
2.973	0.1686	0.004293	Il1r2
-1.807	1.277	0.004425	Gm12239
0.6359	7.722	0.004477	Ppp1r21
-0.5836	9.138	0.004503	Maf
4.026	1.639	0.004551	Gm29536
0.7938	4.477	0.004592	Prelid2
0.7851	4.981	0.004615	Atosa
0.6412	7.754	0.004615	Disc1
0.8022	6.512	0.004625	Sgk1
-0.7457	5.714	0.004625	Tent5a
0.5307	10.85	0.004687	Plcl1
-0.7007	5.977	0.004749	mt-Nd5
-1.322	3.741	0.004768	Ptprz1
-0.6418	6.192	0.004768	Atp6v0b
-1.53	1.614	0.00498	Zfp521
-1.158	3.523	0.005232	Ncam1
0.775	4.986	0.005232	Spns2
-0.9198	4.267	0.005232	Rad23a
-0.6279	5.848	0.005277	Exoc3
-1.454	1.832	0.005319	Rnase6
2.119	0.6357	0.005319	Zfp457
-0.7287	5.788	0.005356	Ttr
0.5282	7.891	0.005356	Eml4
0.5659	10.95	0.005356	Tmcc3
-0.571	6.81	0.005356	Tmem50a
-1.302	3.59	0.005356	Gnao1
0.6183	6.425	0.005374	Ppp1r12b
1.115	5.246	0.005376	Map3k20
0.9111	6.178	0.005419	Neurl1a
0.8162	6.961	0.005442	Wsb1
-0.8721	3.705	0.005442	Bnip3
-1.652	2.196	0.005442	Nr1d1
0.6745	7.067	0.005535	Tspan18
-0.7102	5.084	0.0056	Ptpn18
-1.142	2.513	0.005705	Tmeff2
0.518	6.858	0.005732	Faf1
-1.294	4.599	0.005732	Sult1a1
1.012	5.143	0.005732	Zfp36
-0.6083	5.761	0.005739	Tppp
-0.7081	5.545	0.005739	H2bc6
0.5556	8.154	0.005739	Gtdc1
-1.249	2.488	0.005873	Nedd4
2.919	0.7655	0.006068	Zc3hav1l
-0.4926	8.438	0.006144	Slc7a8
-1.72	2.833	0.006144	A230056P14Rik
-0.5179	6.906	0.006204	Ggta1
0.612	6.334	0.006306	Coro7
0.7331	5.272	0.006358	Wdr25
0.7043	6.025	0.006381	Grk3
0.9275	4.489	0.006527	Synj2
-2.584	1.344	0.006625	Ifi209
-1.11	3.378	0.006766	Lrig3
0.5493	5.778	0.006766	Tgm2
0.9111	5.909	0.006794	Alox5
0.467	6.738	0.006794	Arhgap4
-2.25	0.8346	0.006794	Ncan
0.6978	5.672	0.006851	Ern1
-1.754	3.527	0.006943	Gm48099
0.9498	3.766	0.007007	Selenon
0.619	6.383	0.007009	Ksr1
1.979	2.747	0.007214	Gm15880
-0.604	6.448	0.007285	Abhd15
-1.796	1.484	0.00742	Gm2415
-1.157	6.008	0.007526	Gbp7
-1.739	6.583	0.007545	Slc1a2
0.5684	8.394	0.007578	Nf1
0.5	7.076	0.007884	Osbpl8
-0.7521	5.646	0.008034	Selenos
-1.191	2.916	0.008034	Kcnj9
-0.5679	5.437	0.008034	Aup1
-0.9823	4.486	0.008034	Enpp2
0.5366	7.274	0.008058	Acsl4
1.053	3.162	0.008058	Mms22l
0.7005	5.969	0.008124	Csnk1g3
-1.609	1.125	0.008187	Kif21a
-1.403	2.348	0.008272	Gria1
0.4285	7.208	0.008345	Rapgef6
-0.8881	7.042	0.008345	Slc12a2
0.7957	4.798	0.008359	Ppp1r13b
0.7982	6.723	0.008588	Eya4
-0.5867	7.645	0.008606	Mafb
0.5067	7.622	0.008606	Elk3
-1.579	1.376	0.008606	Stxbp6
0.4939	8.06	0.008606	Map4
1.04	3.701	0.008781	Zfyve21
-0.4827	6.075	0.008781	Tmem106b
-1.939	2.022	0.008787	Amer2
-0.652	4.443	0.008795	Zadh2
0.5187	7.047	0.008837	Stx8
-1.961	0.8139	0.008852	Gm7644
0.4442	8.069	0.009252	Acer3
1.063	2.927	0.009483	Nxpe3
0.9226	6.309	0.009483	2210408I21Rik
-1.612	3.732	0.009491	Ulk4
0.6476	5.723	0.009491	Rasa4
0.4439	8.713	0.009491	Sh3kbp1
0.5926	6.055	0.009573	Ttc7b
-1.618	2.068	0.009589	Gm10874
-0.6821	5.337	0.009659	Syf2
-1.652	0.949	0.009686	Cachd1
0.5334	9.779	0.009686	Numb
0.5318	7.79	0.009686	Tcf7l2
0.719	5.373	0.009686	Focad
0.4894	9.376	0.009862	Large1
-0.7393	4.005	0.009862	Eid1
-0.7313	4.933	0.009862	Zfp691
0.5407	7.988	0.009862	Uvrag
0.4753	7.207	0.009862	Smurf1
0.6035	11.88	0.009862	Plxdc2
1.9	2.223	0.009862	Etl4
-0.609	6.778	0.00992	Rab6b
-0.4937	5.836	0.00992	Paip1
-0.5077	6.698	0.009922	Plxdc1
0.5355	7.046	0.009922	Myo1b
-1.232	2.838	0.009922	Prnp
0.5683	5.077	0.009922	D130040H23Rik
0.4461	8.373	0.009924	Abi3
0.5102	7.746	0.009924	Gcnt1
0.6401	6.288	0.009924	Magi3
-0.9157	4.896	0.009924	Pcdh9
-0.9628	2.7	0.01002	St6galnac3
-1.908	1.271	0.01002	Fam20c
-0.7696	3.776	0.01002	Cox7a2
-1.358	2.357	0.01002	Gm38843
-1.498	4.31	0.01002	Ccdc192
1.791	2.499	0.01004	AI504432
0.5844	5.579	0.01007	4930517O19Rik
-1.695	0.5771	0.01007	Cyp2j9
0.4272	6.616	0.01024	Padi2
0.5119	6.551	0.01027	Slc44a2
-0.8765	3.699	0.01031	Ramac
1.341	5.434	0.01031	Lypd6
-0.8949	3.296	0.01031	Tatdn3
1.82	1.98	0.01033	ENSMUSG00000119955
-0.4581	6.604	0.0105	Gm12185
-1.86	1.243	0.0105	1700112D23Rik
-0.8326	3.812	0.0105	Gm47754
-1.011	2.62	0.0106	St18
1.012	3.083	0.0106	Glrx
-0.5913	7.963	0.01064	Stab1
0.4842	6.571	0.01078	Naalad2
0.6412	5.509	0.01082	Ccl6
-1.035	3.097	0.01084	Ttyh1
0.537	6.63	0.01084	Traf3
0.4787	7.084	0.01084	Usp12
-1.728	0.6139	0.01084	Soga3
0.7667	5.598	0.01084	Igsf8
-0.6675	6.909	0.01088	mt-Cytb
-1.48	2.706	0.01093	Htra1
-1.317	1.68	0.01093	Mapk4
-0.7712	5.595	0.01093	mt-Nd2
-1.583	3.471	0.01093	Tubb2a
0.72	6.598	0.01093	Ust
-1.727	0.6943	0.01093	Cttnbp2
1.074	5.228	0.01093	Btg2
0.67	4.77	0.01098	Apex2
0.7349	5.294	0.01101	Zfp827
1.855	1.178	0.01105	Gm47448
-1.842	1.53	0.01105	Dio2
-1.801	5.199	0.01105	Atp1a2
0.5338	6.62	0.01111	Fbxw7
-1.4	2.066	0.01115	Abat
1.868	0.761	0.01115	Timeless
-0.8364	3.772	0.01115	Acaa1a
0.4676	6.675	0.01115	Acox3
0.6746	4.584	0.01126	Snx8
-0.5301	5.391	0.01138	Selenok
0.5358	6.638	0.01138	Tfeb
0.4711	7.411	0.01145	Rsrc1
1.641	2.652	0.01154	Ccr2
-1.58	1.13	0.01154	Phyhipl
-1.44	1.739	0.01154	ENSMUSG00000120205
-0.7455	4.088	0.01154	Ndufa6
-0.905	3.73	0.01154	Lrp1b
0.8921	6.222	0.01154	Bcl2
-0.9601	2.65	0.01154	Dlg2
0.6055	5.561	0.01154	Znrf3
1.437	3.757	0.01158	Mcc
-0.8774	4.67	0.01172	Trpm3
0.5973	5.797	0.01179	Mad1l1
1.108	3.299	0.01181	2810013P06Rik
0.766	7.078	0.01185	Vps41
-0.5552	5.669	0.01186	Lpin1
-0.4845	5.203	0.01187	Jmy
-0.4783	7.959	0.01193	Ywhah
-0.5631	7.968	0.01193	Rgs2
0.5747	7.375	0.01195	Rhoh
0.5073	5.873	0.01195	Hnrnpdl
-0.4702	5.545	0.01195	Pde4b
0.5154	8.119	0.01195	Msi2
0.7345	5.374	0.01201	Tnfsf13b
-1.598	2.44	0.01202	Slc6a1
-1.753	0.8064	0.01205	Tmtc1
0.5013	7.847	0.01209	Fars2
-0.6086	4.36	0.01209	Tcp11l2
0.5983	6.333	0.01226	Hivep1
-1.13	2.668	0.0125	Sox2ot
4.053	4.571	0.0125	Gm12865
-0.9096	2.816	0.0125	Ndufb2
-0.408	8.844	0.0126	Il6ra
-0.4976	7.184	0.01262	Sipa1
-0.7366	3.368	0.01274	Tada2b
0.4618	7.628	0.01285	Tnfrsf11a
0.4844	8.21	0.01289	Dnmt3a
-0.6159	5.285	0.01295	Clec4a3
0.4734	6.379	0.01295	Rufy3
-0.8673	4.255	0.01295	Hacd4
0.4602	6.747	0.01295	Cdyl
-0.442	7.859	0.013	Rassf2
0.5099	8.298	0.01308	Smad3
0.6313	6.965	0.01308	Gpr183
0.491	8.216	0.01308	Wdfy4
2.432	0.6565	0.01308	Kcna3
-1.26	3.462	0.01308	5830444B04Rik
-0.9148	3.737	0.01308	Plcb1
1.536	0.7046	0.01311	Rapgefl1
0.6723	6.27	0.01311	Denn2b
-0.5951	5.07	0.01313	Cox7a2l
0.5529	6.197	0.01313	Evi2a
-1.215	3.091	0.01314	Atp5k
0.4835	6.548	0.01321	Litaf
-0.5107	6.511	0.01328	Ptafr
-1.965	1.612	0.01328	Tril
0.6795	8.431	0.01337	Cdh23
0.4238	6.673	0.01337	Atp7a
-1.026	3.19	0.0134	Mboat1
1.308	2.974	0.01363	Csrnp1
-0.8474	3.467	0.01367	Inka1
0.5063	5.152	0.01367	Txnrd1
0.6309	4.493	0.01367	Dlg3
0.7158	5.569	0.01367	Cdc14a
0.6421	6.815	0.01367	Pea15a
0.5489	4.725	0.01367	Zfp395
-1.22	5.682	0.01367	Plp1
-0.9191	2.413	0.01367	Ncam2
0.4878	7.381	0.01371	Pfkfb3
0.4892	8.512	0.01375	Apba1
-0.6608	7.716	0.01383	Fcer1g
0.4115	7.824	0.01385	Nptn
0.5104	6.461	0.01385	Il1rl2
1.709	2.936	0.01385	Nr4a1
0.5273	5.103	0.01385	Mospd2
-1.152	2.506	0.01403	Timp3
-1.22	3.14	0.01403	Slc6a11
1.817	0.8975	0.01403	Gm50240
0.8617	4.536	0.01403	Scarna2
-0.6062	5.062	0.01409	Gpd1l
-1.407	2.379	0.01409	Tmigd3
0.4346	8.57	0.01409	Nek7
-0.4555	7.044	0.01415	Spacdr
-1.105	2.053	0.01416	Abt1
1.699	3.059	0.01419	Klf2
0.9075	3.442	0.0142	Smad6
-0.6329	4.361	0.01421	Nkain2
0.541	7.53	0.01431	Lrrc8d
0.5366	7.002	0.01433	Sncaip
-0.8177	4.14	0.01435	Ccdc85c
-0.7733	4.781	0.01435	Atp5h
-0.8983	3.767	0.01451	Cdc42ep3
-0.7294	3.631	0.01454	Mon1a
-0.4067	6.673	0.01465	Rc3h1
0.4657	6.722	0.01471	Zfp609
-1.048	2.979	0.01477	Llph
-0.4635	6.991	0.01482	Btaf1
0.4603	7.148	0.01487	Samsn1
-1.297	1.744	0.01496	Grm7
-0.4554	7.555	0.01508	Abcc3
-1.049	2.3	0.01508	2810405F17Rik
-0.8348	2.981	0.01508	Gm45411
-1.217	1.718	0.01508	Lhfp
1.755	2.356	0.01517	Ccdc102a
-1.101	2.322	0.01517	Iqcc
0.6602	5.695	0.01517	Hspa12a
0.3999	9.463	0.01533	Ppm1h
0.4488	7.871	0.01552	Map3k5
0.5832	6.549	0.01552	Clec16a
0.4895	8.948	0.01552	Ppp1r9a
-0.6211	4.259	0.01552	Uap1
-0.6303	4.699	0.01565	Rabac1
-1.264	2.445	0.01584	Car2
-0.5732	5.084	0.01584	Ncoa4
0.6937	6.446	0.0159	Arsg
-0.9953	4.342	0.016	H2-DMb1
-1.031	2.541	0.016	Kcnq3
-1.118	3.296	0.01609	Iqgap1
-0.8525	3.877	0.01609	Acsl3
0.4745	6.133	0.01619	Flnb
-0.4894	5.133	0.01625	Zfp260
-1.033	3.333	0.01625	Prex2
0.8577	3.941	0.01625	Gm16599
0.4834	6.998	0.01625	Rps6ka5
0.6264	3.952	0.01625	Wdr91
-2.389	1.297	0.01634	4930447K03Rik
-0.5544	4.279	0.01641	Polr1f
-0.4704	8.26	0.01644	Trem2
0.9427	3.121	0.01649	Oprm1
0.6501	6.685	0.01651	Ralgps2
-1.354	1.001	0.01654	Abhd14b
-1.08	2.884	0.01664	Zmat3
0.6863	4.567	0.01665	Hmga2-ps1
0.6289	5.467	0.01674	Zfp69
0.3775	7.459	0.01674	Ubr5
-1.114	2.17	0.01679	Ppp2r2b
0.8065	3.731	0.0168	Gm47469
-0.5866	4.878	0.0168	Rbm42
0.4103	8.858	0.0168	Skap2
0.5189	4.916	0.0168	Acvr1b
0.6737	4.857	0.0168	Hrh2
-0.6085	5.255	0.01688	Emc7
0.4336	5.79	0.01688	Cpne1
-0.7218	6.697	0.01692	mt-Co1
-0.6377	4.27	0.01692	Idh3b
-0.7963	11.25	0.01692	mt-Rnr1
0.4477	6.251	0.01693	Clip2
-0.4949	5.866	0.01696	Rab11fip5
0.8531	5.814	0.01704	Gcnt2
1.084	2.564	0.01704	Gm44899
0.4525	7.212	0.01704	Hipk2
-0.801	3.603	0.01704	Rdh11
-0.5117	4.736	0.01704	Brd9
0.5804	5.333	0.01704	Asah2
-0.443	6.848	0.01704	Kif13a
0.6817	4.402	0.01704	Stk38l
-0.9775	2.78	0.01712	Nrcam
-0.9289	2.802	0.01727	Psma8
0.5084	7.098	0.01734	Tle4
-0.8709	3.663	0.01734	Cbr1
-0.9384	7.209	0.01734	Rpl13a
0.5001	5.52	0.01736	Taf1d
0.5681	4.921	0.01736	Tm7sf3
-0.6793	3.39	0.01736	Nsdhl
0.6738	4.375	0.01736	Lrrc28
0.5212	9.604	0.01739	Prkcb
0.4967	6.295	0.01739	Cdc42se2
0.604	7.289	0.01739	Nlrp1b
-0.653	4.392	0.01747	Cnpy2
-0.5818	5.432	0.01749	mt-Nd4
0.6692	5.551	0.01788	Myo1e
-1.53	1.18	0.01788	Zfp660
-0.4661	4.887	0.0179	Arf2
0.5963	4.52	0.01804	Ercc6
-0.8935	2.746	0.01805	Ctnna2
-1.018	2.993	0.01809	Acp1
-1.037	2.574	0.01811	Nfib
0.6001	5.116	0.01818	Nbeal2
0.6536	8.265	0.01818	Cacna1d
0.8349	3.508	0.01818	2410002F23Rik
0.6369	5.053	0.0182	Lonrf3
0.4306	7.139	0.0182	Spop
-3.399	4.825	0.01828	2610035D17Rik
-0.5703	4.73	0.01828	Gps2
-1.757	1.333	0.01828	Foxp4
-1.356	2.314	0.01828	Pla2g7
0.4428	7.08	0.01841	Fbxw11
-0.795	4.3	0.01843	Npas3
1.488	2.019	0.01843	Eaf2
-1.048	8.441	0.01843	Hspa8
-0.643	3.807	0.01843	Rdh5
0.756	4.189	0.01843	Tsen2
-0.8704	3.265	0.01843	Oscp1
0.464	5.77	0.01845	Pik3r6
-0.9395	2.525	0.01864	Sox6
-1.664	0.9491	0.01864	Psd2
0.3727	7.318	0.01864	Npc1
0.4701	7.981	0.01885	Tbc1d16
-0.7062	3.238	0.01885	Mpv17
1.378	1.661	0.01885	Lmna
0.5578	5.166	0.0189	Eepd1
-0.5135	6.227	0.01898	Adipor1
0.6881	5.046	0.01906	Ddx60
-0.8695	2.726	0.01906	Adgrl3
0.4006	8.649	0.0192	Chd7
-1.104	3.731	0.0192	Kirrel3
0.4478	8.043	0.0192	Arhgap25
-1.141	2.316	0.01928	Jazf1
1.035	3.53	0.01929	Nup210
-1.277	2.059	0.01929	Tanc1
-0.3745	7.812	0.01943	Pik3cg
0.4542	7.292	0.01954	Herc1
-0.8331	3.376	0.01971	Gbp3
-0.5183	5.536	0.01971	Snw1
-1.084	3.439	0.01976	Tnfsf12
-0.7084	4.4	0.0198	Grcc10
-0.7142	4.103	0.01988	Uqcrb
2.446	0.9451	0.01989	Hells
-0.9684	2.313	0.0199	Gm20045
-1.251	1.548	0.01992	Snapc2
-0.5942	10.31	0.01992	Selplg
1.116	3.006	0.01992	Tlcd2
0.6203	4.331	0.01992	Ninl
-1.47	1.169	0.01992	S100b
-1.181	2.27	0.01996	Rgs20
2.09	3.469	0.01996	Sh3rf1
0.5898	5.236	0.02003	Rnf144b
0.4604	6.086	0.02006	Pphln1
-0.4825	6.715	0.02011	Iqsec2
1.64	2.139	0.02011	Gm5420
-0.612	4.111	0.02013	Tnfsfm13
0.4574	8.86	0.02038	Btbd9
-0.7753	3.118	0.02038	Ghdc
0.4088	6.329	0.02038	Zfp277
0.5268	8.35	0.02039	Bank1
-0.3944	6.183	0.02045	Cr1l
-0.691	17.4	0.02045	Rn18s-rs5
-0.4362	7.681	0.02079	Mlec
-0.9796	2.874	0.0208	Akip1
-1.438	1.092	0.0208	Cldn11
-1.364	1.584	0.0209	Ntsr2
0.4438	6.691	0.02094	Pak1
-0.955	3.155	0.02095	Slc35d2
-1.762	5.1	0.02099	Sparcl1
0.4712	5.323	0.02104	Paxbp1
-0.7157	5.898	0.02121	Rpl7
0.4989	5.391	0.02131	Drg1
4.683	1.599	0.02131	4930519F16Rik
-0.443	5.278	0.02132	Myo6
1.694	0.605	0.02132	Gm43909
-1.369	1.524	0.02143	Tle2
1.717	4.835	0.02145	Atf3
-1.603	1.243	0.02148	Mlc1
1.511	2.163	0.02148	Cdkn1a
-1.27	1.398	0.02155	Alyref2
-0.9842	3.81	0.02155	Mmp14
-0.6294	4.775	0.02165	Drap1
-0.7832	4.053	0.02165	Tomm6
-0.8265	3.089	0.02169	Rnaseh2c
0.6109	9.961	0.0218	Snx29
-1.537	1.289	0.02183	Ica1
-2.189	2.277	0.02183	Enpp4
0.6963	4.919	0.02183	Mmp2
1.03	3.56	0.02183	Ptchd1
0.437	6.847	0.02184	Dennd1b
-1.093	2.519	0.02202	Ttc23
-0.7711	3.311	0.02209	Mrps18c
0.8967	6.062	0.02213	Tbc1d4
0.4818	9.875	0.02213	Gab2
0.3924	6.919	0.02223	Ascc3
0.4584	5.558	0.02223	Trp53bp2
0.4143	7.806	0.02227	Tet3
-0.7084	3.747	0.02227	Exoc8
-0.5572	5.745	0.02227	Mid1ip1
-0.5685	4.021	0.02227	Thra
0.4708	6.751	0.02227	Zc3h7a
0.5004	8.236	0.02227	Baz2b
-0.851	5.894	0.02227	Rpl6
-1.665	1.763	0.02229	Acsbg1
-0.8587	2.457	0.02237	Cdkn1c
-0.4304	6.654	0.0224	Purb
0.5556	5.764	0.0224	Klc1
1.567	3.351	0.0224	Gm8091
-0.6202	4.291	0.0224	Ythdc2
-0.9635	2.121	0.0224	Epb41l1
-0.6827	3.746	0.0224	B4gat1
1.692	3.245	0.0224	ENSMUSG00000121207
0.9579	4.483	0.02246	A630089N07Rik
1.608	2.032	0.02251	Iho1
3.697	0.7138	0.02256	Brinp2
2.797	2.612	0.02256	Cacng8
-0.6549	4.287	0.02256	Snrnp27
0.5206	5.707	0.02256	Phtf2
-0.6597	4.005	0.02266	Krba1
0.3414	7.736	0.02267	Edem1
-4.233	2.359	0.02268	4930481A15Rik
0.4325	9.077	0.02268	Exoc4
1.374	1.991	0.02268	Egr2
-1.369	3.334	0.02268	Negr1
1.166	2.143	0.02268	Nox1
-0.4099	8.416	0.02268	Cd33
-0.4624	5.388	0.02268	Cwc15
-0.4994	8.034	0.02268	P4ha1
1.313	1.637	0.02268	Gm36445
-1.038	2.652	0.02271	Gm10125
0.9689	2.875	0.02273	Map3k15
-0.9369	2.685	0.02276	Gm3764
0.4379	8.05	0.02276	Abr
-0.4571	6.963	0.02276	Cd47
1.302	3.674	0.02276	Marcksl1
-0.5511	6.862	0.02287	Frrs1
0.499	5.628	0.02324	Nubpl
-1.037	5.873	0.02324	Rps18
0.4241	8.666	0.02324	Lims1
-0.8588	9.188	0.02333	Gm19951
0.4505	5.345	0.02348	Stimate
-1.291	2.957	0.02351	Gm4951
0.3872	8.001	0.02351	Snd1
0.4746	6.602	0.02351	Rel
0.4528	8.329	0.02351	Med13l
-1.48	1.459	0.02356	Meis2
0.6332	5.539	0.02365	Shb
1.438	1.684	0.02369	Klf4
1.319	1.036	0.02382	5031434O11Rik
0.8739	4.344	0.02385	Fhad1
-1.014	5.923	0.02385	Rpl23a
0.8111	3.977	0.02385	2900026A02Rik
-0.9445	3.11	0.02391	Nebl
-0.9695	6.754	0.02391	Fau
1.176	3.921	0.02392	Ppp1r15a
0.4899	7.555	0.02392	Gspt1
-1.894	1.396	0.02392	Fam171b
0.3854	6.599	0.02392	Memo1
-0.4907	4.591	0.02394	Coa8
-0.7505	3.591	0.02419	Mettl3
-0.5466	4.57	0.02419	Sdhc
0.483	9.187	0.02445	Ttc28
0.5762	5.998	0.02447	Srbd1
0.4875	6.104	0.02448	Sil1
0.8845	4.858	0.02456	Junb
0.4822	6.26	0.0246	Dock9
-0.4857	4.787	0.02466	Gpr108
1.195	2.772	0.02466	Baiap2
0.3833	7.741	0.02466	Usp34
-0.7722	4.893	0.02475	Pfdn5
0.4639	6.874	0.02501	Acvr1
0.3885	8.281	0.02501	Phf21a
0.7618	5.216	0.02501	Cep43
0.4294	7.67	0.02502	Zfp407
0.9587	3.343	0.02506	Gm44710
-1.773	1.94	0.02506	Scg3
3.357	2.57	0.02506	Rab37
-1.152	2.291	0.02516	Nwd1
0.6599	5.357	0.0252	St7
-1.003	1.69	0.02526	Ocln
0.3962	8.632	0.02527	Arid1b
-1.385	1.438	0.02533	Adcyap1r1
-0.3936	6.279	0.02537	Mast3
-0.8101	3.106	0.02543	Parp3
0.4034	9.907	0.02569	Apbb1ip
-0.6026	4.785	0.02575	Cd80
-0.9593	4.81	0.02579	Rpl39
-1.219	1.187	0.02579	Ajuba
0.4388	6.73	0.02587	Eefsec
-0.8132	3.369	0.02589	Prorsd1
-0.4412	5.758	0.02589	Pycard
-2.568	0.7851	0.02597	Enpp5
-1.2	2.291	0.02602	Map2
0.7282	4.504	0.02602	Srgap3
1.253	2.463	0.02608	Ctla2b
-0.692	4.306	0.02624	Creld2
-0.9747	6.088	0.02624	Rps12
-1.02	1.871	0.02624	Akap6
-1.409	3.536	0.02624	Ntrk2
-0.5045	5.279	0.02624	Zfp398
0.5505	5.917	0.02657	Usp35
-0.6171	4.161	0.02662	Dusp12
1.434	1.441	0.02662	Nbl1
-0.4778	5.279	0.02681	Ggps1
-1.16	2.001	0.02681	Nfasc
-0.9839	2.53	0.02696	Rorb
0.39	9.071	0.02702	Fbxl17
-0.3875	8.235	0.02708	Mylip
0.5217	8.317	0.02714	Pvt1
0.4584	5.743	0.02728	Rcan1
-0.6941	3.763	0.02728	Spag7
-0.5663	3.998	0.02731	Caml
-0.6169	3.973	0.02736	ENSMUSG00000121141
0.5052	5.238	0.02736	Taf1b
-1.323	1.518	0.02746	Baalc
-0.5347	5.175	0.02752	Psmc1
0.5937	3.784	0.02783	Saysd1
0.5165	8.491	0.02793	Tbc1d22a
0.5242	5.51	0.02793	Fam135a
0.3829	8.053	0.02793	Adgre1
0.3627	7.06	0.02793	Stk3
0.5144	5.693	0.02801	Mast2
-1.386	1.392	0.02811	Gjb6
-1.166	1.458	0.02811	Ptprk
0.3943	7.391	0.02811	Lcor
-0.5201	4.431	0.02811	Mier3
-1.67	0.8176	0.02811	Tafa5
0.5752	4.995	0.02815	Sugct
-0.4933	5.317	0.02852	Stard3nl
-0.7602	2.828	0.02852	Zfp553
-1.332	1.768	0.02852	Mapk10
0.5007	7.982	0.02852	Dgkd
-0.3822	6.013	0.02852	Msl1
-1.17	1.55	0.02863	Tbc1d7
-0.4218	6.756	0.02884	Sec62
2.007	0.7693	0.02886	Myadml2os
-0.3804	6.281	0.02895	Ppig
-0.7881	3.653	0.02895	Anapc13
1.341	2.778	0.02895	ENSMUSG00000120030
-0.518	4.041	0.02905	Bmyc
-0.5848	4.99	0.02927	Tuba1a
0.5132	6.938	0.02927	Nlrp1c-ps - ENSMUSG00000092528
2.13	1.361	0.02964	Lzts1
-1.224	1.237	0.02966	Lrig1
0.6592	5.61	0.02968	Prune2
0.3693	5.792	0.02989	Ccnl2
0.3277	7.641	0.0299	Clint1
0.4302	6.049	0.0299	Slc39a11
-1.443	1.296	0.02995	Zfp493
-1.491	1.869	0.02995	Dclk1
1.32	2.992	0.02999	Spock1
-0.8082	3.012	0.03001	Ebi3
0.597	4.568	0.03008	Cox10
0.7384	4.107	0.03011	Afap1
1.168	3.75	0.03016	Gm37168
-1.37	1.556	0.03038	Ednrb
-0.6503	3.697	0.03038	Ell2
0.4312	6.345	0.0305	Acvr2a
-1.699	1.379	0.03076	Tmem47
0.7015	3.864	0.03076	Nt5dc3
-0.5463	4.281	0.03093	Gatad1
-0.3408	8.145	0.03093	Snx5
0.4005	6.733	0.03093	Atp6v1c1
-0.4933	5.092	0.03093	Idh3g
-0.8295	2.471	0.03097	Bbs12
0.4892	5.196	0.03099	Inpp5a
1.036	3.979	0.03128	4933421O10Rik
-4.05	4.704	0.03128	Ppfia4
-0.375	7.346	0.03134	Sft2d2
-0.5768	5.962	0.03134	Nr1d2
-1.12	1.624	0.03141	Astn1
-0.4049	7.665	0.03141	Prrc2a
0.467	7.455	0.03149	Sppl3
0.8006	3.292	0.03154	Phospho1
-0.6151	9.039	0.03162	Magi1
-1.221	1.357	0.03176	Grid1
0.3956	9.292	0.03177	Cacnb2
-1.296	0.8989	0.03177	Cdr1os
-0.7178	3.799	0.03185	Chst12
-0.3872	6.214	0.03185	Cebpa
-0.4146	6.668	0.03185	Reep5
0.4972	5.532	0.03187	Dennd2c
0.6866	4.049	0.03223	Niban2
-1.354	1.662	0.03226	Mmd2
-0.9972	1.98	0.03226	Pard3
0.3866	8.807	0.03227	Rptor
-1.236	1.69	0.03246	B3galt4
0.4656	5.486	0.03253	Nudt4
-0.9067	2.111	0.03268	Gm20713
0.7186	3.828	0.03268	Acvrl1
1.555	3.053	0.03279	Chic1
1.299	1.993	0.0328	Gm29282
-1.267	1.209	0.0328	Eola1
0.3624	8.673	0.0328	Plcg2
-0.8377	4.102	0.0328	Mrpl52
-0.8978	3.556	0.0328	Ndufa2
-0.9542	6.443	0.0328	Gapdh
-0.5649	5.86	0.0328	Tmco1
-0.8459	4.451	0.0328	Itsn1
0.6359	4.882	0.03301	Gtf2ird1
-0.7638	3.675	0.03307	Efnb1
0.3748	7.037	0.03308	Psme4
-0.4095	5.776	0.03308	Cdc5l
0.3779	8.432	0.03308	Rab8b
0.4095	6.258	0.03321	Azin1
-0.4492	6.669	0.03321	Kcnk6
-0.5525	6.549	0.03326	Pdia4
-0.6856	4.094	0.0333	4833411C07Rik
-0.5384	5.396	0.03331	Ndst1
0.3356	7.466	0.03331	Lrrfip1
0.3649	8.927	0.03335	Retreg1
0.4477	5.919	0.03335	Zfp516
-0.4202	6.373	0.03337	Pcbp1
0.5776	5.284	0.03338	Tbc1d10a
0.3938	5.557	0.03339	Mrps28
-0.5315	4.274	0.03339	Ddx18
0.5037	5.001	0.03339	Pnp
-0.4372	5.871	0.03339	Tox4
-0.5135	4.338	0.03339	Mag
-0.3728	7.249	0.03346	Ywhab
0.3678	10.24	0.03346	Dock2
-0.6584	4.075	0.03346	Ndufa13
-0.7559	2.861	0.03352	Il1rapl1
-0.3437	6.221	0.03358	Paip2
-0.9946	2.843	0.0337	Pfdn6
0.5321	4.674	0.03376	Naa20
1.18	2.311	0.0338	Capn1
0.4206	8.404	0.0339	Phf14
-0.4506	5.687	0.03401	Gm44503
0.7242	7.044	0.03403	Garnl3
-0.886	2.233	0.03407	Apod
-0.5043	5.447	0.03407	Gm38666
-0.6758	3.167	0.03419	Surf1
0.4588	7.547	0.03427	Strn3
0.4002	9.151	0.03429	Tbxas1
0.7528	4.147	0.03433	Anxa4
-0.9675	2.182	0.03435	Dpm3
-0.7329	2.933	0.03435	9630028I04Rik
0.4006	6.377	0.03437	Adgrl2
-0.5072	4.398	0.03443	Ro60
-0.3869	6.427	0.03446	Myl12b
-0.6008	3.841	0.03446	Ino80c
1.927	1.908	0.03446	Or5v1
-0.7772	7.083	0.03458	Rpl21
-0.354	6.772	0.0349	Fez2
-0.4085	7.465	0.0349	Rsrp1
0.5836	5.653	0.0349	Msra
-1.013	4.505	0.0349	Rpl27
-1.348	1.83	0.0349	Igsf11
-0.4893	5.912	0.03494	Ptges3
-0.9077	2.615	0.03494	Psme2b
0.4427	4.808	0.03513	Als2
0.4883	4.444	0.03517	Aifm1
-0.461	4.856	0.03522	Vamp8
-0.5385	4.649	0.03522	Swi5
0.358	6.468	0.03522	Cyth3
0.3904	6.644	0.03526	Pals2
-0.9494	2.502	0.03533	Prxl2a
-0.4952	4.666	0.03533	Txndc15
-0.8907	3.337	0.03533	Arl6ip4
-0.7025	2.73	0.03533	Mrps23
-1.256	1.255	0.03556	Cadm4
-0.4493	7.031	0.03561	Chsy1
-0.5841	3.481	0.03586	B230354K17Rik
-2.039	0.7544	0.03598	9330111N05Rik
0.4451	8.227	0.03598	Lncpint
0.3254	7.606	0.03598	Tcf20
-0.3854	6.184	0.03607	Pacc1
0.3659	6.439	0.03607	Slc10a7
-0.6461	3.401	0.03613	Bphl
-0.4022	6.513	0.03615	Map7d1
0.4387	5.708	0.03615	Mcph1
0.4208	9.182	0.03615	Slc24a3
0.4952	4.663	0.03633	Scarb1
-1.021	1.765	0.03639	Zfp524
0.4707	7.497	0.03639	Fnip1
0.371	6.198	0.03639	Nt5dc1
-0.6164	3.779	0.03639	Pold4
0.4942	4.705	0.03639	Inpp5f
-0.713	2.688	0.03639	Zfp354c
0.4337	6.321	0.03639	Rab27a
0.5739	9.091	0.03648	Ptprm
-0.6658	4.139	0.0367	Cox7b
-0.3737	7.009	0.0367	Tmem59
-0.9511	5.951	0.0367	Rpl37a
-1.296	10.11	0.03699	Mir6236
-0.3284	6.356	0.03699	Sp1
-0.91	5.335	0.03704	Rps20
-0.8408	2.46	0.03725	Spsb3
-0.8366	2.505	0.03748	Uqcc3
1.245	1.047	0.03748	Crip1
-1.01	1.819	0.03763	Astn2
0.4361	7.497	0.03778	Smg6
0.6612	3.593	0.03783	Ddx43
0.4982	5.099	0.03787	Tmem161b
0.624	4.196	0.0381	Serac1
0.4272	10.54	0.03819	Nav3
-0.782	3.428	0.03819	Adgrb3
0.3784	6.124	0.0383	Pspc1
-0.7339	3.498	0.0383	Cdk2ap2
0.4224	6.637	0.03831	Pik3cb
-0.4617	4.57	0.03831	Yipf4
0.4763	7.374	0.03831	Prkch
0.5164	6.56	0.03841	Rngtt
0.3758	9.041	0.03848	Dennd4a
1.73	3.584	0.03849	Ptger3
0.4742	6.03	0.03876	Rnf19b
-0.7481	7.01	0.0389	Rps9
0.3833	6.259	0.03898	Cblb
-0.937	2.135	0.03898	Lsm11
0.3938	6.342	0.03899	Smad7
1.613	0.7206	0.03971	1810019N24Rik
0.6974	6.113	0.03971	Adamts16
0.9816	3.06	0.03971	Haao
1.629	1.061	0.03971	Vstm4
-0.7967	2.933	0.03971	Gadd45gip1
0.3961	6.566	0.03977	Vps8
-1.043	2.327	0.03981	Edil3
0.4531	6.322	0.03981	Map2k4
1.027	3.289	0.03981	Map3k19
-0.8711	5.15	0.03981	Rps10
-0.4886	5.82	0.03981	Gabarap
-0.7999	3.024	0.04002	Erbb4
-0.5136	4.569	0.04002	Prr13
-1.034	6.984	0.04002	Rplp1
0.3567	6.093	0.04009	Hpcal1
0.3862	6.702	0.04009	Kdm2b
-0.8879	2.483	0.04009	Zfp652os
0.4125	6.002	0.04012	Fam107b
-0.4292	10.7	0.04016	Selenop
-1.631	0.8695	0.04032	Ugt8a
0.3551	6.933	0.04032	Ppp2r5e
-0.3871	6.321	0.04036	Csad
-0.3231	7.15	0.04045	Tax1bp1
0.3384	8.916	0.04045	Pik3ap1
-1.285	1.905	0.04048	Amigo1
-0.5825	5.143	0.04048	Rpl18
0.5439	3.867	0.04048	Casp9
-0.5816	4.026	0.04048	Ndufb9
-0.4673	4.931	0.04048	Psmb8
-0.6268	6.512	0.04048	Rpl17
0.3693	6.82	0.04065	Sltm
0.4382	5.278	0.04065	A930015D03Rik
-1.082	1.506	0.04067	Mad2l1
0.383	7.123	0.04067	Slc4a7
0.7592	3.57	0.0408	Pgm2l1
0.7221	3.063	0.0408	Mdm1
0.6978	5.262	0.04082	Eva1a
0.378	7.108	0.04082	Slc7a7
0.426	6.553	0.04082	Soat1
0.3362	7.067	0.04084	Hmbox1
-0.9575	6.531	0.041	Rplp2
0.3931	7.202	0.041	Rps6kc1
-0.4023	5.18	0.041	Trappc12
0.5573	4.299	0.041	Ets2
-0.7583	5.653	0.04109	Stip1
-0.8671	2.215	0.04117	Zfp235
0.4244	8.011	0.04161	Babam2
-1.19	5.56	0.04171	Zfp984
0.3824	8.799	0.04171	Camk2d
0.4641	5.264	0.04178	Firre
-0.4244	5.515	0.0418	Pnrc2
0.6475	8.395	0.04189	Kcnma1
0.6884	5.865	0.04197	Neat1
0.4398	7.724	0.04217	Agps
0.3868	7.677	0.04224	Dyrk1a
-0.5547	4.149	0.04224	Eif1ax
-0.5183	3.975	0.04224	Pwp1
1.083	1.472	0.04233	Gm10676
0.3882	5.289	0.04236	Tex2
0.3608	8.54	0.04241	Oxr1
0.348	6.983	0.04241	Tmem131l
-0.4321	6.56	0.04241	Rassf4
0.3298	6.633	0.0425	Atxn10
0.4589	6.765	0.04251	Pdlim5
0.7257	6.065	0.04257	Npnt
-1.257	2.263	0.04269	Csrp1
0.5401	4.953	0.04274	Rab20
0.3414	7.735	0.04275	Mbd5
0.7858	3.485	0.04285	Erc1
-0.7294	3.336	0.04304	Tlnrd1
-1.34	1.722	0.04304	Mt3
0.4136	6.075	0.04309	Tbpl1
-0.4831	4.153	0.04309	Ptch1
0.492	4.408	0.04309	Dera
-0.8162	4.995	0.04324	H2-DMa
-1.083	6.802	0.04331	Rps23
-0.3235	10.03	0.04331	Vsir
-0.5432	4.95	0.04331	Rnf6
-0.7542	5.765	0.0435	Rpl31
0.3794	7.321	0.04354	Phkb
-0.6446	4.364	0.04354	Chchd2
-1.05	1.932	0.04354	Gm15608
0.4252	5.339	0.04354	Xpo4
-0.3422	7.543	0.04354	Fmnl1
-0.6173	3.492	0.04354	Flvcr1
-0.3849	5.71	0.04357	Gabpa
-0.6126	3.725	0.04369	Arf5
0.3358	7.113	0.04376	Pign
-0.8475	6.175	0.04376	Rps14
0.6303	5.823	0.0438	Rad51b
0.3776	7.996	0.0438	Tcf12
-1.149	1.708	0.0438	Grik2
0.4426	5.682	0.04381	Uhrf1bp1
0.316	7.693	0.04384	Celf1
-1.042	1.476	0.04384	6430590A07Rik
-0.4403	6.115	0.04384	Clec5a
-0.8622	2.761	0.04384	Nqo2
-0.992	1.894	0.04384	Gm16168
-0.3093	6.246	0.0439	Zbtb7a
-0.5034	4.173	0.0439	Cox17
-0.7363	2.81	0.0439	Limch1
-0.8081	4.081	0.04392	Slamf9
0.3458	7.317	0.04392	Spred1
-0.6776	2.837	0.04392	Borcs6
-0.9194	2.111	0.04397	Zfp874a
0.3921	7.882	0.04397	Dip2c
0.3724	6.612	0.04398	Atxn2
0.3215	7.964	0.04401	Smarca2
-0.3608	6.022	0.04423	Oip5os1
-2.276	2.042	0.04445	Gm10521
0.3434	8.185	0.0446	Atxn7l1
-0.8282	2.497	0.0446	Mob3b
-1.388	1.747	0.04474	Srp54a
-0.4939	5.286	0.04474	Rnf167
2.148	4.141	0.04477	Prkcq
-0.983	1.436	0.04479	Gstm1
1.31	4.697	0.04479	Nfkbiz
1.493	5.399	0.04479	Rgs1
-0.8015	2.247	0.04501	Amacr
0.3516	7.507	0.04504	Rai1
0.5946	5.398	0.04521	1700110C19Rik
-1.079	1.813	0.04524	Il6
-0.4753	4.012	0.04524	Slc46a1
-0.7785	2.592	0.04524	Fgf14
-0.3477	6.929	0.04535	Acp2
-0.887	1.818	0.04562	Rgs5
1.253	2.06	0.04564	Gla
0.5094	5.041	0.0457	Pus10
0.3191	6.233	0.04571	Itpk1
0.7987	3.256	0.04571	Pvr
-0.9726	2.614	0.04577	Mrpl35
-0.4416	5.788	0.04577	Herpud1
0.461	5.036	0.04577	Zc3h3
-1.41	5.998	0.04577	Niban1
0.3317	9.648	0.04604	Ly86
0.3434	6.542	0.04604	Impact
-1.174	1.548	0.04607	Pik3ip1
0.3647	7.884	0.04616	St3gal5
-0.5964	3.771	0.04616	Gm11944
-0.4071	4.694	0.04616	Aga
-2.492	4.512	0.04616	Kitl
-0.4137	5.808	0.04616	Atp6v1e1
-0.7592	4.04	0.04616	Peg10
-0.8651	6.68	0.04616	Rpl23
0.3502	7.063	0.04616	Elf2
-0.8192	2.459	0.04616	Lsm5
-0.9712	1.616	0.04616	Tspan32os
-1.034	2.186	0.04622	Fmn2
1.036	2.611	0.0465	Pmaip1
-0.4857	3.988	0.04658	6430548M08Rik
-1.195	1.582	0.04658	Mrpl53
-0.4969	12.33	0.04668	Cst3
-0.4793	3.806	0.04674	B3gat3
0.36	7.692	0.04677	Pik3r5
0.4027	5.906	0.04677	Cep192
-1.406	0.5867	0.04677	Lgi1
-0.3233	9.108	0.04677	Cttnbp2nl
0.5792	8.83	0.04677	Pard3b
0.3303	7.157	0.04677	Susd6
-0.3411	6.735	0.04677	1700017B05Rik
0.6138	4.672	0.04677	Spns3
-0.6211	5.183	0.04677	Itpripl2
0.4175	10.43	0.04692	Pde3b
0.377	7.166	0.04692	Smurf2
-0.6217	3.245	0.04701	Mkks
-0.598	4.439	0.04701	Vps28
-0.7629	5.49	0.04701	Rpl35a
-0.3864	6.929	0.04717	Creg1
-1.701	1.366	0.04721	Tmem38a
-0.5499	3.655	0.04721	Cox20
-0.5471	4.475	0.04727	Gm46515
-0.9908	1.794	0.04727	Kazn
-0.5244	3.673	0.04727	Mplkip
-1.27	2.841	0.0475	Klhl12
-0.4675	6.973	0.04761	Cyba
0.5618	3.478	0.04761	Nfkbil1
-0.5839	6.751	0.04761	Eif1
-0.5617	3.698	0.04786	Glrx2
0.3595	6.652	0.04797	Smad2
-0.5678	3.272	0.04797	Usp30
-0.4451	5.53	0.04817	Rogdi
-1.411	1.119	0.04817	Tek
-0.6808	3.394	0.04817	Use1
-0.7143	3.743	0.04819	Sgcb
-0.8512	6.815	0.04819	Rpl18a
-0.3686	6.675	0.04819	Cep68
0.5614	4.688	0.04819	Zfp40
-0.9605	2.121	0.04819	Ift22
0.7571	3.935	0.04819	Pirb
-1.126	2.144	0.04819	Cdh2
0.417	8.569	0.04819	Pan3
0.8513	3.471	0.04819	D630045J12Rik
0.3746	7.299	0.04819	Rbm5
-0.5511	7.804	0.04819	Pld4
-0.8106	2.286	0.04819	Septin4
0.3955	5.935	0.04819	Rbpms
-1.747	2.578	0.04823	Treml2
1.391	1.594	0.04823	Gm37305
1.041	1.605	0.04823	Zscan30
-0.6879	3.398	0.04854	Serinc5
-0.8444	2.333	0.04854	Anks1b
-0.8997	5.991	0.04854	Rps27
-1.256	1.727	0.04864	Jph3
0.353	7.621	0.04864	Fmnl2
-0.7337	5.972	0.04864	Rpl22
-0.3652	6.57	0.04864	Stat6
0.5238	5.748	0.04864	Eif2ak2
-0.7116	4.212	0.04864	Tmtc2
-0.6266	3.205	0.04864	Tusc2
1.12	1.411	0.04871	Tob1
-0.5154	4.478	0.04873	Mak16
0.4501	5.939	0.04873	Lemd3
0.7891	8.705	0.04876	Fgf13
-1.212	1.866	0.04887	Mrpl34
-0.4394	4.674	0.04893	Sp2
1.329	1.517	0.04894	ENSMUSG00000120134
-0.7899	2.993	0.04894	Aurkaip1
1.231	1.078	0.04894	Gm37466
0.3103	8.011	0.04894	Tbl1x
0.3662	7.763	0.04913	Fgd2
-0.7893	3.679	0.0492	Sec61b
-0.371	6.195	0.0492	9930111J21Rik2
0.2918	9.3	0.0492	Asap1
-0.3276	9.476	0.04924	Kctd12
-0.7394	2.658	0.04924	Wdr45
-0.6204	3.15	0.0493	Tbrg1
1.063	1.667	0.04931	9630010A21Rik
0.3106	7.61	0.04943	Zfp148
-0.755	5.885	0.0495	Lsamp
-0.3148	8.009	0.0498	Rps6ka1
-0.4953	5.023	0.0498	Cherp
-0.9611	1.693	0.0498	Ermn
-0.6261	3.43	0.0498	Gm36279
0.3391	7.046	0.04988	Vps54
-0.4037	4.921	0.05011	Iscu
-0.5539	4.121	0.05028	Syt11
-0.409	5.216	0.0503	Adprh
-1.104	1.341	0.05047	Setmar
-1.022	1.289	0.05047	Ly6g6d
-0.7286	4.775	0.05047	Rpl36
0.3619	6.835	0.05054	Abcg1
0.3918	6.567	0.05054	Ddx39b
0.3435	6.934	0.05073	Nckap5l
-0.7323	2.766	0.05073	Kcnd2
-0.3958	5.375	0.05074	1110004F10Rik
0.5747	3.639	0.05082	Pola2
0.7164	3.702	0.05098	Zfyve28
0.4031	6.332	0.05105	Relch
-0.4421	5.702	0.05119	Eif2s2
-1.382	1.332	0.05127	Ndrg1
0.4445	4.971	0.0515	Jup
0.3634	7.76	0.05158	Rap1a
0.3699	6.678	0.05161	Gls
-0.4469	4.904	0.05161	Vamp3
-0.3374	6.544	0.05161	Hsd17b11
0.3048	7.014	0.05161	Map2k1
-0.4996	5.897	0.05161	Pot1b
-0.7723	2.822	0.05161	Paqr8
0.3368	7.043	0.05161	Arhgef40
0.3532	7.907	0.05161	Rab31
0.3936	11.07	0.05161	Ldlrad4
0.7871	2.808	0.05161	Gramd3
0.4901	5.095	0.05161	Mtmr10
-0.5186	3.43	0.05162	Mul1
-0.9462	2.464	0.05166	S100a13
0.3629	6.237	0.05166	Pi4ka
0.4406	8.731	0.05172	Arl15
0.4956	6.083	0.05188	Uri1
-0.5375	3.907	0.05189	Rwdd1
-0.471	4.033	0.05189	Ndufb5
-0.887	2.26	0.05189	Adgrf5
-0.8837	2.967	0.05189	Ptprt
-0.3981	7.387	0.05191	Aif1
-0.3362	5.85	0.05198	Cep120
-0.4879	5.914	0.05203	Was
-0.8808	2.648	0.05206	Dbndd2
1.035	2.349	0.0521	Nlrp1c-ps - ENSMUSG00000121474
-0.339	8.116	0.0521	Cmtm6
-0.8152	2.035	0.05229	Jrk
0.3547	8.253	0.05229	Ptpra
0.3308	5.782	0.0523	Erp44
0.5818	4.093	0.0523	Gm42962
0.392	7.238	0.05238	Suclg2
-0.7927	2.674	0.05258	Plaat3
-1.028	1.629	0.05265	Plekhb1
0.4028	5.446	0.05277	Rheb
-0.8264	3.876	0.05282	Bahcc1
-0.712	3.563	0.05294	Nlgn1
-0.655	3.55	0.05307	Wdr83os
0.3424	6.218	0.05311	Ppm1b
-0.4338	7.356	0.05311	St13
0.4031	4.924	0.05321	Sec22a
-1.356	2.234	0.05321	Klf9
-0.9545	2.448	0.05323	Daam2
0.3388	6.935	0.05323	Hnrnph1
-0.5766	5.106	0.05329	Fkbp4
0.5454	6.238	0.05356	Fads1
-0.4186	6.585	0.05356	Washc2
0.3855	7.415	0.05356	St3gal3
0.422	6.292	0.05372	Lrp12
-0.6908	3.617	0.05372	Cox5b
-0.6034	6.185	0.05398	Rpl11
-0.5337	4.105	0.05403	Nsmce4a
1.152	0.907	0.0541	5031425F14Rik
0.4186	4.903	0.05423	Ctnnal1
-0.8183	2.582	0.05423	Asrgl1
0.724	4.382	0.05423	Mpv17l
-0.4418	4.71	0.05431	Nol7
-0.9164	2.729	0.05432	St3gal1
0.9682	6.482	0.05432	Cd83
0.5651	6.432	0.05433	Zfp697
-0.6514	3.525	0.0544	Abtb1
0.3582	6.939	0.0548	Exoc6
-0.5607	4.269	0.05481	Pfdn2
-0.3611	5.868	0.05489	Cnpy3
0.4506	7.581	0.0551	Mtmr3
0.8883	2.174	0.0551	Gins1
0.8346	2.501	0.0551	4930557K07Rik
-0.5042	3.605	0.05532	Cipc
0.5326	4.686	0.05532	Rabgef1
1.366	4.958	0.05532	Creb5
-0.5625	4.219	0.05535	Rxylt1
-0.3718	5.541	0.05539	Rbm28
0.2974	6.728	0.05551	Lpgat1
0.5375	4.458	0.05551	Cracr2a
0.3768	6.162	0.05551	Tbc1d8
-0.9335	5.166	0.05551	Rpl36a
0.3317	6.639	0.05555	Umad1
-0.4474	5.292	0.05555	Nagpa
0.4752	5.707	0.05555	Fam222b
-0.436	4.804	0.05555	Cnih4
-1.554	2.751	0.05556	Rnf17
0.5806	4.588	0.05614	Mmd
0.6199	4.26	0.05626	Nrep
-0.4593	4.481	0.05626	Kdm1b
-0.7729	2.908	0.0563	Epas1
1.301	1.965	0.0563	Zfand4
0.5354	5.091	0.05632	B4galt5
-0.4166	4.667	0.05637	Tmtc3
0.5316	7.378	0.05682	Ptpro
0.8041	2.865	0.05696	ENSMUSG00000121479
-1.363	1.493	0.05702	Acss2
-0.3329	8.209	0.05702	Calm2
0.5624	4.969	0.05702	Ctnnbip1
-0.6425	3.452	0.05707	Lamtor2
-0.7956	2.124	0.0571	Ahnak
0.7004	3.678	0.0571	B4galnt1
0.4729	6.196	0.05713	Map2k6
0.8158	2.237	0.05714	Fahd2a
-0.393	6.174	0.05714	Ctsf
-0.9093	2.16	0.05714	Nckap1
-0.8741	1.689	0.05714	Calhm6
-1.489	0.6579	0.05721	Exd1
-0.7637	5.59	0.05732	Rps25
-0.4345	5.009	0.05732	Mettl7a1
-0.673	2.647	0.05734	Rps19bp1
-0.3324	5.92	0.05744	Brip1os
0.7377	4.459	0.05765	Smim3
0.2928	7.824	0.05767	Cdkal1
1.163	1.396	0.05768	Ubxn11
-0.6749	2.843	0.05768	Psph
-0.9256	8.48	0.05768	Fth1
0.5228	4.054	0.05772	Gm20528
-0.6675	2.846	0.05775	Wbp1
0.4607	4.7	0.05776	Sp140
0.5118	5.218	0.05777	Arhgap32
0.405	8.641	0.05777	Map4k4
-1.085	1.22	0.05777	Rgs7
0.3576	7.426	0.05777	Phip
-0.4781	4.998	0.05783	2810004N23Rik
-0.6956	3.447	0.05783	Ndufa3
0.2994	7.805	0.05787	Huwe1
0.7683	2.834	0.05805	Gm4221
-0.8437	1.815	0.0581	Mrpl27
-0.2956	6.634	0.05817	Slc43a2
0.3327	6.19	0.05833	Prpf39
0.4293	4.231	0.05844	Pld2
0.4323	6.041	0.05859	Abhd17c
0.3577	8.26	0.0586	Extl3
0.3878	5.947	0.05881	Gm49797
-0.7324	5.637	0.05893	Cox4i1
0.5984	3.709	0.05895	Syngap1
-0.3843	5.482	0.05906	Alkbh5
-0.7022	2.856	0.0591	Sall2
0.3666	7.322	0.05923	Ube2h
-0.6018	2.991	0.05933	Tpgs1
0.6368	4.523	0.05943	Ddit3 - ENSMUSG00000025408
0.8538	2.772	0.05948	Gm37229
-1.215	3.54	0.05948	ENSMUSG00000120076
-0.6449	3.307	0.05948	Ndufs6
-0.5359	3.667	0.05955	Mtif3
-0.521	4.804	0.05957	Pom121
0.4295	9.17	0.05962	Smyd3
0.3705	7.94	0.05984	Col27a1
-0.856	2.132	0.05984	Pstpip2
0.3775	5.694	0.05984	Med14
0.3864	7.372	0.05984	Arih1
-0.9292	8.602	0.05984	Hsp90ab1
-0.5447	3.901	0.05998	Mrpl42
0.3305	5.832	0.06002	Rnf2
-0.4759	4.087	0.06006	Dpy19l3
0.4379	7.147	0.0602	Cds1
1.005	2.971	0.06025	Ranbp3l
0.3577	5.58	0.06048	Metap1d
-0.5084	3.979	0.06051	Nkapd1
-0.6352	2.92	0.06051	Zfp825
0.3084	7.077	0.06051	Pcmtd1
-0.9242	1.425	0.06061	Gm21984
-0.5978	2.95	0.06062	Mrpl22
-1.284	1.06	0.06062	Pcdh10
-0.459	4.556	0.06062	Zfp839
-2.445	0.3467	0.06062	Gm40916
-0.4832	4.147	0.06062	Creb3
-0.4116	5.991	0.06062	Ubtf
-0.9645	1.943	0.06062	Lrriq3
-0.5218	3.584	0.06062	Lrrc57
1.706	1.313	0.06062	Wdhd1
-0.414	6.469	0.06062	Ik
-0.7091	3.502	0.06063	Cops9
-1.044	5.527	0.06063	Rps21
-0.4903	4.017	0.06063	Ptov1
-0.5539	3.657	0.0608	Slc50a1
-1.24	1.305	0.0608	Gprc5b
-0.4018	5.645	0.0608	Arl8a
-0.7054	3.016	0.0608	Dtna
0.3415	7.645	0.06081	Myo9a
-0.7829	2.496	0.06082	Tmem129
-0.9019	2.053	0.06123	Stmn1
0.5852	4.088	0.06129	Lrrc75a
0.3939	7.32	0.06131	Fnip2
0.5706	3.665	0.06149	Gpn1
0.4185	6.145	0.06149	Ube2w
-1.422	1.018	0.06149	Gm49974
-0.573	5.152	0.06155	Tsc22d3
0.4446	4.653	0.06181	Cep128
0.4033	6.474	0.06183	Brwd1
-0.964	2.424	0.06183	Pex5l
-0.4608	3.659	0.06183	Ciao3
0.4011	6.624	0.06183	Vps13c
0.2652	7.021	0.06189	Myo18a
0.3399	6.684	0.06189	Klhl7
-0.6556	2.839	0.06224	Polr2j
-0.4692	4.493	0.06256	Nup50
-0.453	4.854	0.06261	Tmem9b
0.3272	9.803	0.06267	Ikzf1
-1.047	3.519	0.06284	Mobp
-0.4555	5.378	0.06287	Camk2n1
-0.5933	4.445	0.0629	Plpp3
-0.5726	3.819	0.0629	Dph5
-0.5092	4.403	0.06301	Ahsa2
1.157	2.588	0.06308	Gm49393
-0.6183	5.599	0.06325	Igsf6
-0.3122	6.003	0.06327	Tnfrsf1a
0.3705	6.197	0.0635	Aatf
-0.7131	3.506	0.0635	Gtf3a
0.4613	4.325	0.06351	Sec61a2
0.8307	2.497	0.06351	Dhrs11
-0.5085	3.773	0.06351	Pde8a
-0.5015	9.425	0.06351	Hsp90b1
0.4967	5.936	0.06371	Tiam1
-2.62	2.17	0.0638	Tubb2b
0.5228	4.414	0.0638	Ccdc62
0.3689	6.898	0.0638	Chchd3
-0.6408	4.327	0.0638	Fyn
0.3687	5.261	0.06392	Washc5
0.3902	9.191	0.06393	Lrch1
0.5378	3.952	0.06393	Gsdme
-0.5255	4.624	0.06393	Strap
-0.825	3.697	0.06393	Mfge8
-0.5263	4.629	0.06393	Gpsm3
-0.5243	4.897	0.06393	Anapc16
0.3507	7.284	0.06393	Bcl2l1
1.976	2.184	0.06393	Tnf
-0.3301	8.725	0.06393	Ifngr1
0.3407	6.044	0.06393	Pex14
-1.38	0.8858	0.06395	Cntn2
0.5545	3.551	0.06395	Nup85
-0.5207	5.095	0.06395	Psme2
0.5157	6.043	0.06395	Rab3ip
-2.7	1.956	0.06395	Clgn
0.5828	8.201	0.06395	Nos1ap
-0.4306	5.445	0.06395	Hsbp1
-0.3971	7.119	0.06395	Nars
-0.475	7.723	0.06395	ENSMUSG00000095041
0.35	7.95	0.06399	Peli1
0.3811	6.138	0.0641	Fnbp4
-0.3252	7.926	0.06411	Tlr7
0.3088	7.578	0.06451	Itpkb
-1.217	1.228	0.06453	Gli2
-0.602	9.846	0.06493	B2m
-1.13	1.882	0.06501	Plekhg1
-0.6277	3.041	0.06504	Ndufa1
-0.721	3.028	0.06507	Zfp628
-0.4422	4.788	0.06513	Card6
-0.4334	4.642	0.06513	Snrpb2
0.5565	3.651	0.06513	Ssh3
-0.3904	4.917	0.06519	1110002L01Rik
-1.078	1.459	0.06519	Megf10
-0.3329	5.539	0.06522	Odr4
0.3834	6.77	0.06533	Srsf5
-0.3724	4.836	0.06535	Afdn
-0.5047	4.738	0.06535	Fkbp2
1.396	1.384	0.06537	ENSMUSG00000120313
-0.4345	4.336	0.06539	Brms1l
-0.4359	4.353	0.06539	Arl3
-0.8731	2.462	0.0654	Gm10524
0.6389	4.67	0.0654	Arap2
-0.9246	2.632	0.0654	Slco1c1
0.3881	6.063	0.06541	Mroh1
-0.6036	4.009	0.06541	Prdx2
-0.3681	5.032	0.06541	Frg1
0.2973	8.636	0.06554	Herc2
0.3236	9.521	0.06563	Ankrd44
0.2962	7.293	0.06563	Ifnar2
-1.077	1.455	0.06563	Pkd2l2
-1.324	1.397	0.06563	Cxcl14
-0.779	3.079	0.06563	Mrpl50
-0.7226	2.555	0.06563	Pygl
0.3415	6.022	0.06563	Abcg2
-0.3344	6.435	0.06565	Hsd17b4
0.9784	2.384	0.06565	Lrrc8b
0.3302	6.768	0.06565	Tlk1
-0.6153	3.832	0.06589	Nabp2
0.4488	5.639	0.0662	Tbcd
-0.8549	6.153	0.06652	Rpl37
0.3492	6.998	0.06656	Galnt7
-0.4725	3.708	0.0666	Chmp6
0.3172	6.478	0.06667	Taf3
-0.3997	4.569	0.06673	Rbsn
-0.9222	1.685	0.06673	Ephb1
2.138	3.075	0.06673	Ccl4
-0.5657	4.346	0.06676	Mrc2
-1.138	1.422	0.06676	Sorcs2
0.2923	6.733	0.06676	Exoc5
-0.8614	2.257	0.06696	Kctd12b
-0.3177	5.904	0.06701	Zkscan3
0.3376	6.172	0.06714	Ankrd10
0.3796	4.987	0.06714	Ints6
-0.5171	5.678	0.06714	Ddost
-0.4624	6.012	0.06725	Itpripl1
-1.048	1.506	0.06767	Nnat
-0.6934	5.438	0.06767	Rps13
1.226	1.486	0.06767	Tns4
-1.119	1.377	0.06767	Pcdhga2
-0.463	10.36	0.06769	Tmsb4x
0.2682	9.211	0.06776	Ptprc
0.3498	6.382	0.06776	Htt
0.6154	5.402	0.06776	Dnajb4
-0.5711	3.824	0.06776	0610010K14Rik
-0.7552	3.02	0.06783	Dmd
-1.019	1.211	0.06783	Fam174c
0.4735	6.592	0.06793	Ptbp2
0.3991	5.901	0.06821	Rybp
-0.5879	5.587	0.06832	D130009I18Rik
0.4615	6.612	0.06833	Rubcnl
0.8195	2.836	0.06847	Rccd1
0.6147	4.332	0.06847	4930444A19Rik
0.6519	3.123	0.06854	Gm15283
0.4384	4.134	0.06854	Stk19
0.5906	5.241	0.06855	Per1
-0.4493	4.102	0.06861	Nol8
0.6578	4.015	0.06869	Zc3h12a
0.378	5.328	0.0687	Cdan1
-0.5737	4.15	0.069	Atp5j2
1.467	1.398	0.0691	4930479D17Rik
0.3404	6.651	0.06919	Usp48
-0.9491	1.543	0.06919	Impa2
0.3989	5.606	0.0693	Rab28
0.3343	7.035	0.06942	Ewsr1
-0.3552	4.745	0.06942	Letm1
-0.6972	2.62	0.06942	Rgs6
0.3992	8.843	0.06942	Rasgrp3
-0.6631	5.496	0.06942	Rps17
0.3825	5.149	0.06942	Ppp1cc
-0.773	5.206	0.0695	Rps16
0.5118	7.568	0.0695	Gab1
-0.9349	1.258	0.0695	Zfp85os
-1.141	2.377	0.0695	Acsl6
-0.6899	2.794	0.0695	Gimap1
0.3192	8.215	0.06959	Fto
1.027	1.451	0.06959	Sik1
0.3341	6.256	0.06961	Dtnbp1
-0.5983	3.213	0.06974	Mrps33
-0.4848	3.845	0.06992	Mocs2
-0.9872	1.275	0.06992	Stk39
-0.5795	3.72	0.06992	Lmf2
0.3483	6.339	0.06992	Tmem65
-0.4365	4.159	0.06992	Pnpla2
-0.5141	3.681	0.06992	Agbl3
-0.7797	2.405	0.06996	St6galnac5
0.3567	5.559	0.07006	Lin52
1.006	2.395	0.07006	Hmgn3
-0.6481	3.143	0.07026	Znhit1
0.7019	3.013	0.07031	Prdm5
-1.049	2.861	0.07039	Gm5834
-0.7637	4.029	0.07039	Prmt5
-1.584	1.416	0.07039	Vegfa
-0.3095	6.206	0.07039	Pura
-0.4484	6.081	0.0704	Klf13
-0.4551	4.472	0.0704	Ccdc117
0.3541	9.447	0.07045	Celf2
-0.9436	1.537	0.07045	Gm8093
-0.5577	3.875	0.07048	Rbm15b
0.8174	3.808	0.0705	Notch4
-0.7813	2.403	0.07052	Chchd4
0.3584	5.522	0.07052	Fbh1
1.022	2.135	0.07052	Plekha4
-1.041	1.487	0.0706	Egfr
0.4791	5.852	0.0706	Dusp16
-0.4521	6.513	0.07075	Ppp1r18
-0.2945	6.416	0.07075	Il13ra1
0.3288	5.611	0.07098	Gtf2f2
-1.677	3.554	0.07106	Lilra5
-0.3473	5.27	0.07106	Brd3
3.458	1.574	0.07106	Gm44257
-0.6277	3.2	0.07106	Uqcr10
-0.6894	3.265	0.07109	Sash1
-0.9767	2.156	0.0712	F3
-1.564	5.644	0.0712	Rps3a1
-0.6088	3.054	0.0712	Lyrm2
0.2687	10.74	0.0712	Macf1
0.7161	8.029	0.0712	Arhgap24
-1.015	1.399	0.0712	Timm10
-0.4124	4.704	0.0712	Bcl7b
0.4887	4.296	0.0712	Jam3
-1.698	3.214	0.0712	Dubr
-1.734	2.473	0.07125	Bcan
-0.4121	4.563	0.07125	Nudt9
0.4486	4.89	0.07126	Pde7a
0.8602	3.007	0.07126	Osm
-0.3817	5.861	0.07126	Eng
0.3681	5.297	0.07129	Lclat1
-0.5042	4.184	0.07129	Gnl3l
-0.3587	6.064	0.07151	Cysltr1
-0.2987	9.531	0.07151	Abca9
0.3606	8.615	0.07155	Tmem135
0.2558	7.093	0.07155	Ndfip1
-0.3129	6.68	0.07178	Cebpg
-0.5967	3.423	0.07184	Timm21
0.4175	9.729	0.07194	Plxna4
1.085	3.214	0.07195	Id2
-0.7848	5.608	0.0725	Rps26
-0.4434	5.232	0.07252	Lyl1
-2.042	5.231	0.07255	C5ar2
0.4149	7.297	0.07255	Rffl
-1.201	2.977	0.0726	Fbxl7
-0.3812	6.677	0.0726	Magt1
-0.9741	1.682	0.0726	Ndufaf8
0.2768	9.96	0.0726	Cyrib
0.3217	7.728	0.07272	Setd5
-0.5684	3.202	0.07272	Rsph3b
-0.768	2.34	0.07278	Rad1
0.832	3.174	0.07285	Gpd1
-0.5843	6.046	0.07296	Rbfox1
0.3521	5.111	0.07297	Src
0.3609	5.878	0.07306	Prkdc
0.4361	4.729	0.0735	Rbl1
-0.4525	5.088	0.07382	Mbd3
-0.3819	4.211	0.07382	Nosip
1.563	3.037	0.07402	Itgax
1.448	1.652	0.07425	Gm32552
-0.4002	5.418	0.07425	Tlr9
-1.238	1.665	0.07425	Hepacam
-0.8497	3.561	0.07425	Cetn2
-0.4597	4.634	0.07425	Dynlrb1
0.5246	4.448	0.07425	Epha2
0.3139	6.759	0.07438	Naip2
-0.5515	3.023	0.07445	4921524J17Rik
-0.7655	5.942	0.07445	Rps7
-0.4219	4.609	0.07445	Suclg1
0.4034	5.69	0.07476	Unk
0.3998	6.598	0.07476	Cep85l
-0.3731	6.144	0.07481	Pttg1ip
0.302	7.14	0.07481	Pum1
0.3248	6.302	0.07481	Ehbp1
1.172	1.763	0.07488	Gpr162
1.23	2.044	0.07488	Galnt6
-0.6928	2.806	0.07492	Hspa4l
0.4223	6.012	0.07506	Dcakd
0.5589	3.729	0.07506	5330406M23Rik
0.3328	6.145	0.07508	Foxo1
-0.5878	3.941	0.07518	Tmbim1
-1.045	2.186	0.07518	Tnfsf10
0.3636	8.018	0.07518	Phc2
-0.5424	4.06	0.07521	Uqcrh
-0.5121	4.675	0.07522	Tor4a
0.3222	7.185	0.07522	Nedd4l
-0.4135	4.994	0.07532	Smu1
0.3199	6.567	0.07537	Gm21992
-0.2774	5.957	0.07538	Twf2
-0.7064	2.924	0.07543	Arhgef4
0.6712	2.943	0.07549	Cand2
0.5067	3.684	0.07549	Ubtd2
0.4656	4.283	0.07549	Bcl7a
-0.281	8.408	0.07552	Gdi2
0.4766	5.363	0.07552	Plekho2
0.5123	4.07	0.07552	Ttpal
-0.4881	3.317	0.07552	Haus3
-0.3102	5.629	0.07563	Atxn7l3b
0.3286	5.626	0.07563	Dph6
-0.326	6.494	0.07596	Pbxip1
-0.4497	5.776	0.07596	Atp5pb
0.3369	8.279	0.07599	Cd86
-0.4286	4.561	0.0761	Atp5j
0.3704	6.018	0.0761	Ppfibp2
0.3332	13.61	0.0761	Malat1
-0.2614	7.748	0.0762	Hook3
0.3302	6.831	0.07636	Rabep1
0.436	5.291	0.07642	Chka
-0.3076	7.43	0.07663	Arl6ip1
0.3616	5.945	0.07665	Ralgapa2
2.08	3.057	0.07689	Ccrl2
0.4479	9.427	0.07698	Fhit
-0.421	4.433	0.07719	Deptor
-0.5042	4.664	0.07769	Fam50a
-0.3992	5.412	0.0777	Prkcsh
0.4375	4.587	0.07779	Nup93
0.3161	7.055	0.07779	Lyst
-0.8115	1.798	0.07782	Polr2i
-0.4961	4.575	0.07799	Cox6a1
0.3161	8.15	0.07806	Luc7l2
-0.6187	3.196	0.07806	Coasy
-0.6736	3.485	0.07806	Sf3b4
0.3542	5.407	0.07806	Ano10
0.5631	3.384	0.07807	1700001C19Rik
-0.9032	6.025	0.0781	Rpl41
0.2616	6.539	0.07812	Ogdh
-0.3399	9.962	0.07815	Tmem119
0.44	5.212	0.07819	Bcr
-0.7322	2.109	0.07829	4933424M12Rik
0.643	4.313	0.07829	Pola1
-1.003	1.949	0.07829	Inafm1
0.9797	2.43	0.07831	Ehhadh
-0.9799	1.635	0.07868	Zfp688
-0.9713	1.322	0.07882	9130221H12Rik
-1.585	3.185	0.07882	Atp1b2
-0.7664	2.458	0.07904	Ptprb
-0.7081	5.185	0.07904	Rpl30
0.3329	6.046	0.07932	Vmp1
0.426	4.612	0.07962	Dipk1a
-0.9513	1.996	0.07962	Cers4
-0.7169	2.381	0.07962	Sf3b5
-0.7678	2.219	0.07963	Gm11084
-0.3821	4.459	0.0798	Chpt1
-0.3334	5.886	0.07981	Bcap31
-1.247	1.432	0.07984	Ppdpf
0.3869	5.732	0.07985	Slc9a7
-0.5226	4.422	0.07991	Ubxn1
0.2635	7.033	0.08015	Asxl2
-0.8442	2.559	0.08015	Mrc1
-0.3667	4.39	0.08015	Ccdc174
-0.5945	2.981	0.08015	Gm14325
-0.4792	3.502	0.08015	Pigh
0.343	6.519	0.08015	Tbk1
-0.6586	6.276	0.08015	Rpl10
-1.113	1.586	0.08017	Gpld1
-0.3638	4.386	0.08017	Retreg2
0.3507	7.186	0.08017	Aopep
-0.9571	1.663	0.08028	Hbb-bs
-0.2892	6.851	0.0803	Hp1bp3
0.7903	3.698	0.08061	Tfdp1
-0.6257	2.83	0.08068	Gm17344
0.7253	4.152	0.08068	Pyroxd2
-0.948	2.336	0.08071	Rps4l
0.3479	5.65	0.08071	Rhbdd1
0.7611	3.066	0.08071	Megf11
0.3467	8.052	0.08071	Exoc6b
-0.279	7.091	0.08071	Plekho1
-0.7142	4.855	0.08071	Zfp933
-0.9328	2.043	0.08071	Atp2b2
0.2828	7.857	0.08071	Dock1
-0.8191	1.941	0.08071	ENSMUSG00000119991
-0.4421	4.351	0.0808	Cep104
-0.3404	6.883	0.08082	Sting1
-0.2906	5.742	0.08087	Ctc1
-0.6021	2.615	0.0809	Plxna1
-0.9869	1.126	0.0809	Gm26621
0.5787	3.301	0.0809	Tpst1
-0.3138	6.265	0.08092	N4bp2l1
-1.078	2.442	0.08093	Gpm6a
0.4251	5.15	0.08095	Nfxl1
0.3144	6.171	0.08095	Nbas
-0.41	4.66	0.08095	Zfp263
0.3004	7.229	0.08095	Mark3
0.2923	7.062	0.08095	Lrch3
0.3145	6.532	0.08114	Stat5b
0.5796	3.491	0.08114	Apmap
-0.3351	5.24	0.08114	4930599N23Rik
1.237	0.8913	0.08122	5930403N24Rik
-0.7407	2.176	0.08132	Zc4h2
-0.5886	2.932	0.08132	Arl11
-0.3953	4.755	0.08132	Txndc9
0.4215	8.317	0.08133	Rnf180
0.2437	9.529	0.08134	Abhd12
-0.6066	5.606	0.08134	Rpl24
0.3841	11.07	0.08134	Maml3
-0.4037	5.047	0.08138	Dnttip2
0.7858	2.862	0.08161	Rcc1
-0.6871	5.739	0.08161	Kxd1
-0.6838	3.36	0.08176	Eif1ad
-0.9672	1.382	0.08176	Dpyd
0.8217	2.863	0.08177	Cd74
0.2983	8.209	0.08189	Stag1
-0.4082	4.717	0.08189	Agpat5
0.9596	2.154	0.08189	Akap5
0.3211	5.288	0.0819	Rev1
-0.2615	6.8	0.08201	Pcdhgb2
-1.029	3.399	0.08201	Sdc4
0.4548	6.404	0.08207	3110082I17Rik
0.2885	6.048	0.08207	Zcchc24
-0.6139	2.667	0.08211	Asb1
0.4052	6.159	0.08214	Ank
0.5599	4.123	0.08215	Ncoa7
-0.2796	7.341	0.08215	Bach1
0.3089	7.432	0.08215	Ubac2
0.817	2.555	0.08215	4933433G15Rik
-0.5874	3.936	0.08215	Cuta
-0.6872	6.33	0.08215	Rpl14
-0.329	6.982	0.08221	Tle3
0.3991	7.114	0.08221	Rgl1
0.5042	4.77	0.08242	Adk
-0.7546	2.58	0.08242	Mien1
0.5582	3.296	0.08269	Setdb2
-0.5893	5.077	0.08269	Rpl35
-0.3123	5.775	0.08272	Rab11b
1.136	1.367	0.08272	Glipr2
-0.4423	4.488	0.08282	Lrrc25
-0.9258	6.496	0.08282	Rps29
0.3488	7.226	0.08306	Znrf1
0.4	7.488	0.08331	Cryl1
0.6755	3.214	0.08331	Shfl
0.469	4.474	0.08333	Ankmy2
-0.8476	1.632	0.0835	Gm11368
-0.3968	5.435	0.0835	Ctbp2
-1.19	2.046	0.08357	Psmg4
0.2801	7.178	0.08363	Tnks
-0.429	5.162	0.08367	Gm21988
0.3632	7.701	0.0837	Cd180
1.01	2.94	0.08419	Gm44686
1.194	2.694	0.08432	Adamts1
-0.444	4.389	0.08438	Dhx34
-0.583	3.499	0.08446	Apex1
-0.352	6.711	0.08446	Gm33989
-0.8758	1.587	0.08446	Fut9
-1.021	1.161	0.08446	Cav2
-0.6457	3.371	0.08458	Per3
0.3599	6.154	0.08475	Nsf
0.6673	4.842	0.08475	Cd52
0.6682	3.116	0.08492	Ildr1
-0.6927	2.249	0.08497	Rce1
0.3527	4.751	0.08507	Dhx32
0.3198	6.861	0.08507	Ogt
-0.7346	4.983	0.08507	Ntm
0.7712	3.085	0.08507	Vxn
-0.3427	9.819	0.08507	Entpd1
0.2888	7.704	0.08517	Pkig
0.3411	8.729	0.08527	Pitpnc1
-0.9556	1.6	0.08589	Gins3
0.4599	3.891	0.08589	Usp50
1.406	5.301	0.08589	Rasgef1b
0.5602	5.26	0.08589	Tagap
-0.2469	6.736	0.08589	Krcc1
-0.5585	3.122	0.08589	Ttc32
0.4196	6.856	0.08589	Rassf3
0.3882	4.572	0.08589	Wdtc1
0.3193	6.29	0.08596	Ctps2
0.5348	5.732	0.08596	Ppp1r10
0.363	4.722	0.08608	Mrpl1
0.3624	6.067	0.08608	Map3k14
-0.2666	11.48	0.08608	Cx3cr1
0.3838	7.633	0.08608	Vrk2
0.3292	6.21	0.08641	Kdm4c
0.2889	9.295	0.08641	Prex1
0.8331	4.195	0.08641	Dclk2
-0.6323	3.265	0.08643	Ppp1r14b
0.3023	8.081	0.08643	Rbm25
0.292	7.771	0.08645	Mapk14
1.451	1.255	0.08648	Ier3
-0.2585	7.527	0.08653	Serinc1
-0.5733	4.784	0.08657	Myl6
-0.5273	12.11	0.08702	mt-Rnr2
-0.6047	2.329	0.08703	Sspn
0.3331	6.342	0.08711	Cwc27
0.3565	6.057	0.08711	Wdr20
-0.3846	4.252	0.08737	Layn
-0.5076	3.294	0.08748	Snx16
0.3678	6.159	0.08759	Pkp4
0.2633	8.011	0.08764	Ankrd17
-0.858	2.421	0.08814	Gpc6
0.2805	11.43	0.08834	Slc8a1
0.2644	6.331	0.08834	Rab3gap2
0.3133	6.291	0.08847	Ppp2r2a
0.2877	7.433	0.08855	Supt3
-0.5751	5.811	0.08868	Manf
0.4444	4.786	0.08868	Tpcn2
-0.9996	1.671	0.08868	Csgalnact1
0.3243	7.471	0.08875	Rbm47
-0.5512	3.23	0.08876	Lrrc4c
0.3242	5.465	0.08877	Iars2
1.107	1.997	0.0891	P2rx1
0.3462	6.592	0.0891	Srpk2
-0.3745	7.077	0.0891	Serbp1
0.3221	6.504	0.0891	Clcn5
-0.78	2.805	0.08915	Mrpl51
-0.6199	3.223	0.08915	Mea1
-0.6145	2.427	0.08915	Lrrc51
0.3123	9.305	0.08915	Jmjd1c
0.357	7.153	0.08915	Map2k5
0.5114	3.595	0.08935	Slc16a3
-0.566	3.633	0.08953	Ift20
-0.4941	3.583	0.08956	Plxna4os1
0.319	6.438	0.08958	Pon3
-0.8439	1.748	0.08958	Tenm3
-0.584	3.092	0.08958	Gm12940
-0.8695	5.624	0.08958	Rps15
-0.6552	2.081	0.08958	Them4
-0.3033	5.69	0.08962	Cnot8
0.9926	1.793	0.08988	6030443J06Rik
-0.5885	2.76	0.0899	Rfxank
-0.5236	3.512	0.09037	Scnm1
-0.668	5.678	0.09045	Rps15a
0.4285	4.366	0.09065	Mlh3
-0.6736	2.713	0.09083	Cyb5d1
0.2693	8.545	0.09099	Asph
-0.4988	3.773	0.09099	Ebp
0.346	5.108	0.09113	Gnpat
-0.6221	4.691	0.09156	Cox8a
0.3095	5.728	0.09156	Tcerg1
0.2574	7.369	0.09156	Nktr
0.8491	3.355	0.09156	Tex14
-1.778	1.844	0.09156	Adssl1
-0.8697	1.659	0.09167	1700086O06Rik
0.9628	1.7	0.0917	Tubb6
0.2889	6.594	0.09182	Ube3c
-0.7893	1.793	0.09198	Mrpl23
-0.484	4.177	0.09198	Slc5a3
-0.4489	3.586	0.09208	Mrpl10
0.2642	9.911	0.09235	Maml2
1.741	2.172	0.09235	Egr1
-0.341	4.887	0.09235	Sike1
-0.5717	3.334	0.09235	Eif6
-0.4444	4.506	0.09235	Cnih1
0.3221	6.725	0.09235	Atad2b
0.2543	6.951	0.09235	Etnk1
0.2517	7.035	0.09235	Raly
-0.2613	8.275	0.09235	Rhob
0.8231	4.039	0.09235	Susd1
0.2726	8.377	0.09235	Myo1f
-0.8033	1.846	0.09239	9530026P05Rik
0.2823	9.151	0.09251	Ski
-0.7052	2.754	0.09256	Zfta
-0.5129	3.355	0.09296	Bag5
-0.4765	4.741	0.09297	Psmd6
0.2801	6.316	0.09298	Slc38a1
0.2765	8.635	0.09325	Fam172a
0.6105	5.389	0.09325	Sgip1
-0.5233	3.552	0.09325	Phospho2
-0.6693	2.506	0.09325	Thap11
0.8988	3.237	0.09325	2010013B24Rik
-0.556	3.212	0.0933	Zfp37
-0.5778	2.953	0.0933	Psmb5
-0.3731	5.411	0.0933	Rpl7l1
-0.4158	4.306	0.0933	Lmo4
-1.003	1.413	0.0933	Arhgef26
-0.4073	4.867	0.0935	Tsnax
-0.3857	4.307	0.09391	Pygo2
1.218	3.947	0.09391	Nfkbid
-1.024	1.391	0.09405	Ddt
0.2786	6.195	0.09405	Arhgap35
-0.3735	4.896	0.09408	Rnf187
-0.4668	4.435	0.09412	Fkbp3
-0.8482	2.122	0.09429	Sorbs2
0.3427	6.562	0.0943	Ston2
-0.8601	1.13	0.09451	Itga10
0.3946	7.37	0.09451	Chd2
0.4337	5.01	0.09459	Zfp810
-0.373	5.135	0.09473	Pomp
-0.853	3.186	0.09483	Nab2
0.9473	2.673	0.09484	Ly6m
0.5377	4.82	0.09498	Tram2
0.9054	1.936	0.09504	Hspa1a
-1.011	1.952	0.09504	Uaca
-0.5295	3.551	0.09504	Dnajb2
0.3521	4.785	0.09504	Utp20
-0.7113	4.919	0.09526	Rpl38
0.5427	3.391	0.0953	Gm20721
0.476	5.571	0.0953	Coro1c
0.3088	9.166	0.0953	Fgfr2
-0.4192	4.362	0.0953	Gpx4
-0.3365	4.762	0.0953	Nfu1
0.3423	7.946	0.0953	Sh3pxd2a
-0.3134	5.772	0.09546	Chordc1
1.241	2.004	0.09551	Il1r1
-0.5801	3.019	0.09571	B3galt1
0.3111	8.82	0.09576	Mgat5
-0.3467	5.486	0.09579	Slc39a10
-0.7229	6.753	0.09579	Rps3
-1.081	1.241	0.09589	Map1b
-0.8714	1.352	0.09589	Kcnrg
-0.4406	5.496	0.09589	Cct7
0.6624	2.5	0.09589	Rptoros
-2.136	2.964	0.0959	Ston1
0.6803	2.765	0.09595	Snhg1
0.2977	6.744	0.09602	Dagla
-0.5424	3.408	0.09603	Nudt7
-0.3485	5.613	0.09606	Tnfaip8l2
-0.319	5.598	0.09633	Rab18
0.5235	4.138	0.09656	2610020C07Rik
-0.6216	2.636	0.0968	Faap20
0.3589	5.441	0.0968	Tsc1
-0.4299	4.608	0.09706	Vps4a
-0.3044	5.608	0.09743	Abcf1
-0.4256	4.08	0.09743	Mgme1
-0.6002	5.204	0.09743	Gpr160
0.3951	5.573	0.09755	Cmas
-0.2415	7.486	0.09757	Hmgb1
-0.663	2.618	0.09757	Pcdh7
-0.8152	1.552	0.09757	Adcy2
-0.5523	4.38	0.09765	Engase
-0.2326	7.695	0.0978	Aftph
0.2828	6.766	0.0978	Mgrn1
0.3997	4.904	0.09799	Vamp1
0.2523	8.525	0.09805	Fnbp1
0.3158	6.433	0.09827	Commd10
-0.5731	3.103	0.09827	Clpp
-0.3989	8.64	0.09827	Trf
0.2947	5.332	0.09857	Dnajc18
0.2785	11.16	0.09865	Dock4
-0.4453	3.401	0.09865	Pxmp4
0.4007	6.516	0.09865	Plcb2
-0.4681	3.81	0.09866	Cfap36
-1.127	1.532	0.09866	Mtss2
0.2432	7.083	0.09871	Slc6a6
1.273	2.449	0.09871	Gm37876
0.3916	6.466	0.09886	Zfand5
0.5707	3.628	0.09886	Pgap1
[truncated: 55,011 more rows]

## Sheet: DE-6_Fibroblast
logFC	AveExpr	p_val_adj	gene_names
-2.21	7.211	1.002e-05	Hyou1
-3.478	5.574	1.002e-05	Creld2
-2.433	7.622	1.002e-05	Manf
-2.077	7.428	1.37e-05	Pdia4
-2.473	10.13	2.456e-05	Hspa5
-1.691	9.332	4.569e-05	Calr
-1.774	10.14	7.176e-05	Hsp90b1
-1.733	7.555	7.215e-05	Pdia6
-2.857	4.89	0.0001026	Sdf2l1
-1.355	7.04	0.0001376	Ide
-1.797	6.626	0.0001812	Dnajb9
-1.287	6.748	0.0004111	Serp1
-1.316	6.659	0.0004657	Dnajb11
-1.644	6.823	0.0004703	Selenos
-1.732	5.213	0.0004703	Rpl29
-1.245	9.062	0.0006547	Dnajc3
-1.603	5.202	0.001758	Atp8a2
-0.9916	7.476	0.002049	Sel1l
-1.281	5.588	0.002049	Sec23b
-1.17	9.601	0.002223	Pdia3
4.36	3.7	0.002421	Iqgap2
-1.017	8.33	0.002647	Serpinh1
4.288	2.082	0.002647	Pianp
5.449	3.628	0.002698	Gm40847
-2.129	4.025	0.003065	Copz2
-1.155	6.652	0.003065	Xbp1
-1.225	7.027	0.003223	Magt1
-2.506	3.141	0.004779	Mettl1
1.471	7.253	0.005823	Maml3
-1.073	6.854	0.005823	Rps18
4.187	4.179	0.005995	Prune2
-1.41	4.416	0.005995	A430033K04Rik
-1.399	5.503	0.005995	Nucb2
-1.392	4.869	0.006276	6430548M08Rik
1.549	5.203	0.01108	Tmem18
-1.438	4.742	0.01165	Rpl36al
-0.9443	7.866	0.01254	Pals2
-1.03	7.93	0.01323	Atp2a2
-0.9827	5.382	0.01323	Mydgf
0.9998	6.004	0.01578	Sypl
2.725	3.845	0.01694	Ntn4
1.549	5.848	0.01694	Nrp2
-0.742	7.943	0.01867	Ubr4
-0.8004	7.596	0.01867	Spcs2
-0.7229	7.183	0.01921	Rplp2
-0.9705	7.18	0.02083	Rpn1
-0.7794	6.88	0.02291	Selenok
-0.9775	5.938	0.02431	Edem1
-0.7723	9.18	0.0252	Canx
-1.15	5.769	0.02671	Sec61b
1.142	6.357	0.03001	Mid1
-1.031	4.825	0.03001	Ndufb2
-1.998	3.576	0.03108	Atp6v0e2
0.9709	7.692	0.03323	Gm5860
-0.8184	6.417	0.03323	Btaf1
0.9372	6.175	0.03323	Glrb
1.311	7.583	0.03323	Ntrk3
-0.7133	6.834	0.03429	Ssr3
-1.038	4.869	0.03768	Rbm42
-0.8821	5.485	0.0377	Txndc11
-1.76	4.098	0.0377	Rpph1
-0.7181	6.106	0.04038	Alg2
1.841	5.364	0.04038	Met
-0.9066	6.789	0.04091	Hmgcs1
0.8319	6.742	0.04091	Xpr1
-1.4	4.663	0.04091	Camk2n1
1.115	5.308	0.04091	Fggy
-0.816	8.027	0.04091	mt-Nd1
1.215	5.865	0.04091	Zfp536
-1.169	5.57	0.0413	Cyp51
-0.9674	13.75	0.0413	mt-Rnr1
-0.7455	6.638	0.0413	Nars
-0.7994	5.409	0.0413	Eif3j1
-1.347	4.526	0.0413	Cys1
-0.6549	7.883	0.0413	Myl6
-3.127	2.677	0.0413	Rab6b
1.227	5.155	0.0413	Qsox1
-0.7178	6.674	0.04229	Prpf4b
-1.001	6.664	0.04246	Plac9
1.048	6.384	0.04246	Gabbr1
0.8793	6.082	0.04251	Ankrd50
-0.7196	8.707	0.04251	Rrbp1
0.6162	9.69	0.04251	Auts2
-0.6958	6.537	0.04251	Mphosph8
-0.8575	7.805	0.04251	mt-Nd2
-0.7597	6.351	0.04251	Tuba1b
-0.7131	6.77	0.04314	Ik
-0.6757	7.99	0.04314	Flna
-0.8678	8.668	0.04438	mt-Co1
-1.224	3.978	0.04446	Ormdl2
2.107	3.475	0.04446	Gch1
0.6145	7.411	0.04592	Clmp
1.429	5.549	0.04592	Agmo
-0.6474	8.328	0.04593	Hdlbp
2.507	5.219	0.04876	Tnfsf10
-0.6437	7.326	0.04893	Uso1
-0.871	4.816	0.05111	Rab7b
1.102	5.247	0.05111	Man1c1
-0.6588	8.359	0.05235	Hsp90aa1
-0.6806	6.31	0.05235	Hdgf
-0.8956	5.983	0.05235	Eif1a
-0.6809	7.233	0.05235	Rpl18a
-1.331	3.968	0.05252	Fdps
-0.8108	5.411	0.05308	Akap17b
-0.8802	5.612	0.05793	Tbrg1
-1.146	4.124	0.05892	Nans
2.062	5.905	0.05892	Tpd52
-0.6792	6.35	0.05892	Lman2
-0.7624	6.562	0.05892	Fam3c
1.008	5.184	0.05909	Wnk4
-0.7378	5.708	0.05909	Ufm1
-0.8102	5.561	0.05909	Fkbp2
-0.7762	6.164	0.05975	Gas5
-1.052	4.476	0.05975	Use1
-0.6728	7.17	0.05975	Rps9
0.9918	5.599	0.0602	Pacs1
0.8199	6.574	0.06054	Zfp423
0.5954	7.095	0.06054	Arhgap10
-0.7824	5.973	0.06097	Cox7b
-0.969	4.786	0.06097	Krtcap2
-1.123	4.468	0.0614	Slc35b1
1.986	4.111	0.0614	Ddx60
-0.7904	5.267	0.0625	Ppp1r15b
-0.6936	6.197	0.06266	Cds2
-0.765	7.825	0.06351	P4hb
-0.9583	7.795	0.06359	mt-Nd5
-0.7228	6.07	0.06359	Rpl36
-0.9169	5.606	0.06367	Ssr2
-0.8236	9.564	0.06367	mt-Cytb
-0.6139	6.446	0.06425	H13
-0.8531	6.215	0.06553	Rps13
-0.8594	4.995	0.06703	Gm10964
-0.7923	5.611	0.06786	Stx12
-0.7749	5.358	0.06786	Rint1
-1.041	4.134	0.06786	Armcx3
-0.9557	4.365	0.06786	Unc45a
0.6761	6.072	0.06786	Dzip1
-1.162	4.548	0.06786	Tmem258
-0.6902	6.324	0.06786	Maco1
-1.13	5.582	0.06786	Hspa13
1.198	4.387	0.06786	Map3k20
-0.7166	5.913	0.06786	Spcs3
0.8516	6.671	0.06786	Aox1
-0.5796	7.747	0.07031	Eif3a
-0.7213	5.782	0.07031	Rabl6
1.068	4.582	0.07031	Rab3il1
-1.006	5.738	0.07187	Ostc
-1.101	4.956	0.07491	Syvn1
-0.8326	5.073	0.07491	Ssr4
-0.922	4.962	0.07674	Tmem50b
-0.5918	6.387	0.07674	Ptges3
1.222	5.621	0.07674	Nav1
0.9799	5.046	0.07674	Ptprf
-0.7469	6.517	0.07674	Tubb4b
-0.8866	6.258	0.07674	Uggt1
-1.718	3.832	0.07674	Clec11a
-0.8529	4.502	0.07881	Mkks
0.8251	7.256	0.07996	Ldlrad4
-1.057	4.127	0.0802	Zfyve21
-0.7016	6.325	0.08042	Rpl7a
-0.7543	5.402	0.08133	Steap3
-0.7194	6.787	0.08181	Rpl24
-0.8084	4.798	0.08181	Prr13
3.293	4.097	0.08325	Msln
-0.6805	6.083	0.08449	Rpl38
-0.7121	5.888	0.08607	Tmem248
-1.1	4.256	0.08824	Sec11c
-0.871	5.024	0.08824	Lrrc59
-0.8469	4.558	0.08858	Csnk2b
1.539	4.226	0.08858	Podxl
-1.702	6.266	0.08911	Herpud1
-0.7158	5.626	0.08911	Elob
0.7784	7.479	0.08911	Ube2e2
-1.746	3.592	0.09072	Cacna1g
2.004	3.304	0.0912	Mmp15
-0.7184	5.918	0.09123	Rpl34
-2.295	4.315	0.09131	Dbp
-0.6226	5.852	0.09154	Eef1d
-1.682	4.005	0.09207	Tuba4a
-0.6024	7.426	0.09314	Cast
-1.039	4.366	0.09332	Atp5g1
-0.6121	6.904	0.0936	Cox4i1
1.084	5.085	0.09718	Trerf1
0.6521	7.623	0.09718	Fus
0.6953	8.463	0.09718	Lama2
-0.5766	6.263	0.09718	Pnn
-0.5593	7.467	0.09718	Mia3
-1.087	4.729	0.09718	Cdk2ap2
0.7041	6.655	0.09718	Cpd
-0.7087	8.852	0.09795	Hspa8
0.6958	9.52	0.1007	Rfk
-0.8819	5.294	0.101	Nrxn2
0.8139	7.554	0.1036	Smyd3
-0.7517	5.213	0.1038	Tspyl2
-0.7415	6.566	0.1038	Soat1
2.24	5.286	0.106	Stxbp6
2.096	3.662	0.1061	Edil3
-0.4829	8.404	0.1061	Golgb1
1.233	4.277	0.1061	Rhbdd1
-0.5617	6.904	0.1061	Gorasp2
0.8539	6.058	0.1061	Ppt1
1.592	3.779	0.1061	Marcksl1
-0.6557	6.028	0.1061	Txnl1
0.8647	6.025	0.1061	Cdo1
0.6809	5.398	0.1061	Ttc23
-0.6344	5.622	0.1061	Rpl10a
2.038	3.449	0.1062	Prkar2b
-0.9016	4.951	0.1062	Fam133b
1.712	3.421	0.1062	Cbr3
-0.5571	6.151	0.1062	Rabac1
-0.6916	5.614	0.1064	Cope
-0.5826	7.567	0.1064	Rpl13
0.8248	5.173	0.1067	Manba
1.115	4.12	0.1067	Map3k14
0.5867	6.73	0.1068	Lrba
-0.7959	5.438	0.1076	Nolc1
0.52	7.125	0.1078	Rnf13
-0.8056	5.782	0.1078	Pcna
-0.5816	6.885	0.1086	Rpl23a
0.7566	6.792	0.1086	Mob3b
0.6818	6.6	0.1086	Extl3
-0.5416	7.084	0.1094	S100a10
-1.221	4.958	0.1108	Phlda1
0.9641	4.798	0.1126	Lynx1
-0.6083	8.03	0.1126	Hipk1
0.5542	8.611	0.1134	Il6st
0.8715	5.339	0.1141	Scube1
1.806	5.558	0.1143	Adamts12
-0.7297	5.607	0.1179	Fam76a
-0.5987	5.753	0.1189	Ddrgk1
1.294	4.088	0.1191	Cd59a
-0.6006	5.965	0.1223	Rpl35a
0.9605	7.282	0.1225	Eda
-0.8313	4.727	0.1251	Ndufa11
0.702	6.574	0.1266	Atp8a1
0.6653	5.998	0.1266	Map2k5
-0.6681	6.94	0.1266	Rpsa
-0.7637	14.26	0.1297	mt-Rnr2
1.59	4.141	0.1299	Gm49342
-0.6418	5.525	0.1299	Emd
-0.593	5.978	0.1299	Cct7
1.114	4.392	0.1306	E2f3
-0.605	5.59	0.1315	Cebpz
0.7468	6.09	0.1325	Adgra2
-0.5225	7.01	0.1325	Ipo7
-0.7411	6.368	0.1335	Tuba1a
0.8054	5.406	0.1335	Rbpms
-0.5314	6.803	0.1335	Saraf
-0.6548	5.389	0.1343	Tomm6
-0.6939	10.38	0.1343	Clic4
1.653	4.798	0.1343	Nfkbiz
-0.8745	5.031	0.1343	Rbm15b
-0.9658	4.985	0.1343	Ift20
-0.7459	5.677	0.1343	Higd1a
-1.463	3.311	0.1343	Ephb6
-0.5237	6.374	0.1343	Nemf
0.8891	5.239	0.1343	Cdan1
-0.64	5.498	0.1343	Dad1
-0.6445	7.079	0.1348	Rpl37a
0.777	6.89	0.1348	Irs1
-0.571	7.523	0.1358	Rpl21
0.7192	7.213	0.1358	Pam
0.65	8.036	0.1358	Wwox
-0.5987	5.608	0.1358	Usp19
1.194	4.732	0.1358	Col6a3
-0.7398	4.823	0.1358	Mfrp
-0.576	6.052	0.1383	Cdc5l
1.118	6.042	0.1383	Hs6st2
0.7448	6.045	0.1383	Ucp2
0.5323	9.484	0.1383	Slc47a1
1.398	4.667	0.1388	Myo1e
0.5908	6.807	0.1388	Tmem64
-0.8615	4.198	0.1388	Mis12
0.9344	5.334	0.1388	Dsg2
-0.4835	8.088	0.1426	Eif1
-0.6982	5.115	0.1426	Nsun2
-0.8815	3.85	0.1426	Ddt
-0.7354	6.351	0.1451	Angpt1
0.7552	6.139	0.1452	Clmn
-1.318	4.251	0.146	Tango6
-0.6189	5.708	0.146	Rsl1d1
-0.7663	5.03	0.146	Dhcr24
-0.4982	7.568	0.146	Map7d1
-0.6449	8.058	0.1467	Rpl13a
-0.564	6.795	0.148	Rpl11
-0.475	7.32	0.1481	Arhgdia
0.6594	6.847	0.1481	Pard3b
0.5207	7.892	0.1481	Atxn1
-0.5315	6.123	0.1481	Alx4
0.6032	7.168	0.1491	Pcca
0.5278	6.544	0.1491	St6gal1
-0.664	5.547	0.1491	Zc2hc1a
0.6466	7.037	0.1491	Atrnl1
0.4762	6.786	0.1491	Hnrnpl
-1.117	4.295	0.1493	Gadd45b
0.5053	7.405	0.1493	Itpr2
0.5202	7.489	0.1493	Igf1r
-0.946	4.068	0.1493	Utp3
-0.6284	5.984	0.1493	Scfd1
-0.999	6.962	0.1493	Klf4
-0.5428	7.489	0.1493	Golga4
0.7359	6.169	0.1493	Bmp7
-0.494	7.518	0.1539	Arl6ip1
-0.5174	6.919	0.1542	Gabarap
1.223	4.406	0.156	Slc16a6
1.213	6.033	0.156	Enpp1
-0.6875	5.28	0.1563	Uqcr10
-0.7693	4.858	0.1563	Pdcd5
-0.6359	5.696	0.1563	Irf2bp2
-0.7043	5.082	0.1571	Hint1
-0.8884	4.123	0.1571	Rbmxl1
1.046	5.517	0.1571	Col11a1
0.7952	5.008	0.1571	Nme7
0.7107	7.218	0.1571	Dennd4a
-0.7664	6.4	0.1571	Ptgis
0.7978	6.948	0.1571	Plat
0.5323	8.55	0.1571	9530026P05Rik
-0.4918	7.373	0.1571	Mlec
0.8235	6.42	0.1571	Trp53i11
-0.8408	4.201	0.1578	Mak16
-0.589	6.956	0.1611	Rps27
-0.5265	7.557	0.1611	Gapdh
-0.5363	5.933	0.1611	G3bp1
1.592	4.765	0.1611	Stau2
-0.5774	5.616	0.1614	Cebpg
0.6733	6.261	0.1616	Oxr1
1.534	4.15	0.1616	Map2k6
0.7813	4.823	0.1616	Rbmx
0.6619	5.725	0.1616	Herc3
-0.8611	5.634	0.162	Cox5a
-0.8232	4.487	0.162	Pum3
1.362	3.614	0.162	Mindy4
0.7418	5.119	0.1625	Traf3
0.9013	4.846	0.1627	Ppard
0.8428	8.489	0.1641	Islr
1.073	5.095	0.166	Junb
-0.8847	5.593	0.166	S1pr1
0.675	5.905	0.1664	Snx12
-0.4827	7.506	0.167	Baz1b
0.7523	5.091	0.167	Camk1
-0.7406	4.63	0.167	Ufc1
-0.5013	6.087	0.1674	Zbtb7a
-0.5977	5.2	0.1675	Anapc11
-0.4967	7.474	0.1675	Sec63
-0.6625	5.679	0.1675	Exoc3
-0.6561	6.088	0.1675	Cdk11b
-0.8102	4.191	0.1675	Gps2
-0.5949	5.018	0.1689	Slc30a5
0.5357	8.04	0.1698	Scara3
-0.6379	5.798	0.1698	Slc33a1
-0.6188	7.038	0.1715	Fau
-0.6988	6.592	0.1721	Fzd4
-0.4817	7.146	0.1721	Rpl10
0.6436	5.664	0.1721	Ifitm10
-0.6998	5.106	0.1725	Scyl1
-0.5405	6.602	0.1725	H2-D1
0.9295	4.408	0.1726	Spindoc
-0.4945	6.879	0.1726	Rpl32
1.196	3.796	0.1726	Mospd1
-0.4739	6.422	0.1726	Luc7l3
-0.4646	7.384	0.1726	Hnrnpa3
-0.8696	3.928	0.1726	C2cd2l
-0.5569	5.328	0.1726	Ndufb9
-0.5682	5.337	0.1726	Ssu72
0.9064	7.369	0.1726	Hdac9
-0.7876	4.65	0.173	Mtf1
-0.8128	4.815	0.173	Krr1
-0.686	5.149	0.1732	Vps4a
-0.5805	6.107	0.1743	Rps19
-0.6957	5.326	0.1743	Uba5
-1.089	3.88	0.1743	Dtymk
-0.7194	5.094	0.1743	Tubgcp5
0.5783	7.926	0.1743	Tshz2
0.5767	5.794	0.1753	Cers2
0.6991	4.811	0.1761	Bcap29
1.062	5.543	0.1786	Rapgef5
1.185	4.579	0.1786	Itga11
-0.7353	5.385	0.1786	3425401B19Rik
-0.7806	4.127	0.1794	Mrpl21
-0.8402	4.78	0.1796	Atp5mpl
0.7786	6.05	0.1796	Tns1
0.4584	6.75	0.1798	Dip2b
0.6583	6.495	0.1798	Egflam
-0.4411	7.61	0.1798	Thoc2
-0.8303	4.839	0.1798	Wnt5a
0.9862	4.539	0.1798	Celsr1
1.619	4.84	0.1819	Mxd1
-0.5595	7.215	0.1819	Tubb5
-0.8202	4.466	0.1848	Cluh
0.7991	6.139	0.1854	Glcci1
-0.8282	3.793	0.1865	Lrrc4
-0.6231	5.205	0.1865	Rpl27
0.8347	5.135	0.1868	Emp2
0.7177	5.842	0.1876	Eif2ak2
-0.4739	7.755	0.1876	Lima1
-0.4388	7.076	0.1876	Sec61a1
-0.653	5.198	0.1876	Ndufa7
-0.4853	6.623	0.1904	Arf2
-0.6331	6.462	0.1905	Fasn
-0.5277	6.812	0.1914	Rps26
0.5808	6.404	0.1921	Scaper
-0.476	7.487	0.1935	Prrc2a
-0.4509	6.987	0.1951	Rpl26
0.7776	4.615	0.1951	Ankrd33b
0.6895	5.564	0.1961	Epb41l5
0.7014	5.35	0.1975	Fbxo32
0.5184	6.594	0.1975	Dock11
-0.5272	6.262	0.1975	Atp5h
-0.5888	5.55	0.1975	Cox7a2
0.8253	5.819	0.1975	Runx2
1.444	3.88	0.1975	Asah2
-0.4043	7.397	0.1975	Rab1a
0.5736	5.765	0.1975	Map4k3
-0.7844	5.087	0.198	Tubb2a
-0.9566	4.383	0.198	Tuba1c
0.664	6.116	0.198	Lama4
1.056	4.145	0.1981	Evi5l
-0.4423	7.54	0.1983	Top1
-0.5733	7.366	0.1983	Oat
0.7232	5.211	0.1983	Lrig2
-0.6342	4.847	0.1983	Ilf2
0.5772	6.901	0.1985	Sesn3
0.6389	5.263	0.1985	Antxr2
-0.755	4.386	0.199	Cd2bp2
0.5155	5.551	0.2001	Btrc
-0.4904	7.766	0.2001	Rpl41
0.817	5.254	0.2001	Zfp827
-0.8395	4.539	0.2001	Cdk5rap3
-0.5945	6.691	0.201	Rps7
-0.627	5.895	0.2019	Rpl36a
0.8483	5.027	0.2051	Fhl2
-0.5464	7.465	0.2052	Ecrg4
-0.6567	5.205	0.2052	Gng5
-0.4535	6.221	0.2052	Eif2s2
1.114	3.904	0.2052	Trmt9b
0.5716	6.075	0.2052	Nt5c3
-0.4729	7.485	0.2052	Rpl23
-0.6652	4.77	0.2052	Preb
-0.7688	3.947	0.2052	Mrpl54
0.5763	5.912	0.2052	Slc44a2
-0.6003	4.995	0.2052	Atf4
-0.5488	6.88	0.2054	Rps12
-0.4678	6.934	0.2057	Tns2
-1.063	5.009	0.2057	Mdk
1.309	3.96	0.2057	Terf1
-1.871	6.407	0.2057	Igfbp2
-1.648	5.194	0.2057	Unc13c
0.5244	7.649	0.207	Phf21a
0.809	5.637	0.2078	Spock2
0.5209	5.784	0.2078	Map3k7
1.45	3.351	0.2081	Vsig10
-0.4161	7.477	0.2081	Tmed10
-0.9329	4.266	0.2085	Atf5
-0.5676	6.668	0.2085	Stt3a
-1.129	6.458	0.21	Aldh1a1
-0.5572	5.85	0.21	Tmed5
-0.7766	4.369	0.21	Stk35
0.6363	6.115	0.21	Atosa
-0.6161	5.663	0.21	Prxl2c
-0.7532	5.227	0.21	Rab5if
0.7053	6	0.21	Enox2
-0.5816	5.192	0.21	Dnajb2
-0.6543	5.632	0.21	Rps10
-0.6838	4.555	0.2103	Gm45837
-0.6257	5.37	0.2103	Gm12185
-0.5901	4.955	0.2103	B4galt5
-0.7824	3.773	0.2103	Wdr12
-0.8395	4.214	0.2108	Ddx19a
0.5214	5.445	0.2113	Fam20b
-0.5526	5.615	0.2113	Copz1
-0.4499	7.05	0.2113	Rpl8
0.8707	6.316	0.2117	Kank4
-1.043	6.592	0.2117	Rps2
-0.7378	5.346	0.2118	Cry2
0.591	8.418	0.2125	Plxna2
0.6717	6.699	0.2125	Etv6
0.4375	6.566	0.2125	Hnrnpr
0.6077	5.049	0.2126	Socs7
0.5589	8.154	0.2126	Ttc28
0.4447	6.82	0.2128	Kif13b
-0.4901	5.899	0.2128	Sumo1
0.8789	4.209	0.2133	Serpinb1a
-0.596	5.263	0.2133	Romo1
-0.4813	8.638	0.2133	Ftl1
-0.6555	5.687	0.2133	Srp14
-0.743	4.186	0.2133	Dapk3
0.5221	7.802	0.2133	Tcf7l2
-0.4204	7.707	0.2133	Srpr
-0.8326	4.876	0.2139	Mif
-0.7671	4.277	0.2139	Ubl4a
-0.541	5.597	0.2139	Pa2g4
0.7738	5.395	0.2139	Jam2
1.167	3.917	0.2139	Adck1
-0.5312	5.792	0.2139	Mgat2
-0.4584	6.704	0.2139	Otud1
-0.7595	4.26	0.2139	Gm49322
-0.7095	5.485	0.2139	Uap1
0.7916	4.63	0.2139	Crat
0.7008	5.499	0.2139	Armh3
-0.7762	4.434	0.2139	Fam50a
-0.8394	4.551	0.2139	Slc24a4
-1.702	4.783	0.2139	Flrt3
-0.6029	8.5	0.2139	Npr3
-0.462	7.518	0.2139	Arcn1
0.6746	6.471	0.2143	Rgmb
-0.4865	6.93	0.2143	Jund
-0.4721	6.706	0.2143	Morf4l2
-0.6201	6.333	0.2143	Rpl12
-0.425	9.263	0.2143	Cst3
0.4725	7.416	0.2154	Svil
0.5917	5.958	0.2154	Atxn7
-0.4973	6.315	0.2154	Cryab
-0.5074	6.067	0.2154	Rps25
0.6814	5.207	0.2155	Wdr6
-0.4163	7.165	0.2157	Stt3b
0.4126	7.774	0.2161	Plcb4
0.5827	5.378	0.2162	Gpr107
0.7572	4.834	0.2188	Sox4
-0.538	5.324	0.2188	Fkbp4
0.8061	4.37	0.2188	Pqlc3
0.4834	6.826	0.2188	Aopep
-0.8532	4.641	0.2188	Ndufs7
-0.5876	5.377	0.2188	Bicd2
0.6656	5.196	0.2188	Osbpl1a
0.5752	5.259	0.2188	Tia1
0.917	4.519	0.2206	Krt80
-1.065	6.405	0.2206	Tef
0.5569	5.597	0.2218	Ocrl
-0.7008	4.298	0.2223	Zfp9
-0.7095	5.424	0.2228	Erp29
0.5466	6.833	0.2236	Rin2
0.7077	5.176	0.2252	Txndc16
-0.469	6.405	0.2256	Gfpt1
1.01	4.653	0.2259	Gpc1
0.7525	4.627	0.2259	Zdhhc6
1.014	4.418	0.2263	Zfp729a
-0.5103	5.236	0.2263	Cnih4
-0.4128	7.645	0.2263	Rps4x
0.5128	6.684	0.2264	Mbtps1
-0.5004	6.624	0.2264	Rps11
-0.446	7.363	0.2264	Rps23
-0.6037	4.989	0.2264	Ndufb7
-0.5224	6.001	0.2272	Ufl1
0.5467	6.664	0.2272	Prickle1
0.6782	4.488	0.2272	Yipf1
-0.4465	6.272	0.2272	Rps20
-0.5057	6.933	0.2272	Rpl31
-0.6017	5.016	0.2273	Gtpbp4
-0.489	8.916	0.2281	Nudt4
-0.5558	4.865	0.2281	Kctd10
-0.6823	4.783	0.2282	Auh
0.8079	4.665	0.2282	Apba1
1.036	4.093	0.2289	Fmnl3
-0.6652	5.383	0.2289	Rwdd1
1.209	3.765	0.2304	Cdc14b
-0.4823	5.814	0.2306	Derl1
0.5237	7.8	0.2315	Gab2
-0.7811	3.954	0.2315	Champ1
-0.6227	4.585	0.2315	Dgcr8
-0.7086	4.963	0.2315	Tbcb
-0.5067	5.655	0.2317	Osbp
-0.5166	5.673	0.2317	Wbp11
0.6884	5.524	0.2317	Myo1d
1.231	5.978	0.2317	Ccdc171
0.4237	6.97	0.2317	Mark3
-0.4659	6.869	0.2317	Eprs
0.5195	5.459	0.2317	Armc8
0.3958	7.383	0.2317	Zcchc24
1.317	4.34	0.2317	Gm10649
0.7032	7.28	0.2317	Sobp
0.4867	5.5	0.2317	Spopl
-0.4915	6.066	0.2317	Phldb1
0.5554	6.909	0.2317	Ubr3
-0.7846	4.363	0.232	Gpt2
-0.8654	4.371	0.232	Rnps1
-0.5612	4.658	0.232	Dhx32
0.5742	5.009	0.232	Got2
-0.687	4.433	0.232	Gnl3
-1.174	4.79	0.232	A930015D03Rik
-0.5108	7.228	0.232	Rps3
-0.7332	3.945	0.232	Zbtb21
-0.5133	7.152	0.2325	Shc1
-0.4086	7.101	0.2326	Hp1bp3
-0.6433	4.739	0.2339	Jpt2
-0.6704	4.078	0.2339	Secisbp2
-1.016	3.733	0.2339	Shank1
0.969	6.317	0.235	4930594M22Rik
0.6887	5.438	0.235	Casd1
1.078	3.911	0.235	Tfrc
-0.4737	5.152	0.2354	Rbm8a
-0.4943	6.464	0.2354	Sbds
0.8045	4.602	0.2354	Rnf43
-0.5115	6.406	0.2354	Set
0.5387	8.115	0.2354	Flrt2
-0.5726	5.006	0.2354	Cetn2
0.8734	4.253	0.236	Lama5
-0.7781	4.297	0.236	Ndufab1
1.491	4.937	0.236	Gas7
-0.523	6.218	0.236	Srp72
-0.5939	5.311	0.2362	Tmem214
-0.4273	6.784	0.2363	Ralbp1
0.4826	6.593	0.2364	Rgl1
0.5932	9.337	0.2365	Mir99ahg
-0.4721	6.661	0.2365	Tram1
-0.5828	4.7	0.2365	Tmem39a
0.7729	5.644	0.2365	Fyn
-0.6059	5.378	0.2365	Ppil4
-0.5538	6.783	0.2369	Klf6
-0.4327	7.137	0.2373	Rps5
0.4412	6.876	0.2375	Lgr4
-0.6299	4.948	0.2375	Rars
0.9649	3.832	0.2376	Wdfy1
0.54	5.281	0.2383	Lypla1
-0.5175	5.672	0.2412	Spcs1
-0.9192	4.324	0.2413	Cebpb
-1.392	6.029	0.2413	Kitl
1.015	4.021	0.2422	Tmem63a
-0.4023	7.139	0.2422	Hnrnpm
-0.5208	6.06	0.2422	Pde4dip
-0.4092	7.158	0.2431	Rab6a
-0.5018	5.637	0.2431	Sec22b
0.7245	5.863	0.2431	Asap2
-0.5708	5.055	0.2431	Tsen34
-0.6753	5.602	0.2445	Bms1
1.402	5.872	0.2453	Atf3
-0.8883	3.829	0.2456	Trim39
0.4946	5.916	0.2459	Herc4
-0.6645	5.965	0.2459	Osr1
-0.413	6.236	0.2478	Sec16a
1.043	4.515	0.2478	Zfp467
-0.3991	8.242	0.2478	Ptma
-0.4521	7.994	0.2478	Nfe2l2
-0.4363	6.298	0.2478	Ddx50
0.6389	5.566	0.2478	Gm16070
-1.288	4.778	0.2478	Per3
0.3912	7.809	0.248	Zfand3
0.8191	5.315	0.2504	Ccdc141
-0.566	5.079	0.2504	Cdc42se1
0.4848	5.241	0.2504	Vkorc1l1
0.5614	5.156	0.2515	Mtmr2
0.7028	5.302	0.2515	Prpf39
0.7945	4.841	0.2525	Stard9
-0.4496	7.035	0.2525	Ubxn4
-0.6364	4.69	0.2525	N6amt1
-0.7159	5.558	0.2525	Acpp
-0.4515	6.861	0.2525	Sub1
1.119	3.647	0.2528	Nsun6
-0.5577	6.4	0.2529	Cltb
-0.6885	4.706	0.2529	Rnf181
0.4027	7.417	0.2529	Sdc4
-0.37	8.455	0.2529	Ncl
-0.7637	4.2	0.2529	Bpnt1
0.439	7.222	0.2529	Dock7
1.048	4.018	0.2529	Acss3
0.5398	5.983	0.2529	Focad
0.4624	8.032	0.2529	Fbxl17
-0.5328	5.081	0.2529	Sf3a3
-0.7374	4.655	0.2529	4732440D04Rik
0.443	7.111	0.2531	Rabgap1l
-0.9359	3.717	0.2531	Snrpf
0.7412	6.261	0.2531	Ctxn3
2.515	4.902	0.2533	Pcdh11x
0.4079	8.091	0.2533	Ctnnb1
0.3953	8.873	0.2533	Mrc2
-0.9022	3.533	0.2542	Nlrp5-ps - ENSMUSG00000041596
0.5911	5.14	0.2542	Slc9a1
-0.6845	4.657	0.2542	Bud31
-0.7459	4.167	0.2542	Dmpk
-0.7533	4.015	0.2542	Gm10076
-1.69	6.1	0.2542	Rps3a1
0.5712	7.769	0.2542	Arhgap20
-0.6138	6.938	0.2542	Tecr
-0.6738	4.697	0.2542	Imp3
-0.759	4.952	0.2542	Pebp1
0.6861	5.293	0.2542	Tmtc4
0.6563	5.042	0.2542	Tmem51
-0.4345	6.053	0.2552	Serf2
-0.6391	4.595	0.2553	Uxs1
-0.6794	4.623	0.256	Surf1
0.6253	5.242	0.2565	Bmp1
-0.5532	4.908	0.2571	Prpf19
-0.9244	3.648	0.2574	Ipo4
1.726	3.301	0.2582	C130023A14Rik
0.4747	5.539	0.2582	Pabpn1
-0.4938	5.121	0.2587	Dgkz
-0.8668	3.845	0.2599	E2f6
-0.5787	4.953	0.2604	2210016F16Rik
0.8507	7.662	0.2604	Hmcn1
-0.798	3.877	0.2612	Gtf3c2
0.9234	4.247	0.2612	Fbxo34
-0.3562	8.375	0.2612	Son
-0.6934	7.028	0.2612	Nr1d2
-0.4545	5.247	0.2612	Atp5g3
-0.7029	5.155	0.2617	Tmem256
-0.4428	6.661	0.2632	Far1
-0.8726	3.871	0.2635	Mrps12
-0.4417	7.403	0.2635	Sult1a1
0.726	4.248	0.2635	Ints6l
0.7554	4.368	0.2642	Birc3
0.4592	7.334	0.2642	Sbf2
0.7049	4.214	0.2642	Manbal
-0.5409	5.061	0.2642	Git1
-0.4045	6.255	0.2642	Cep170
0.6015	6.518	0.2642	Ldlrad3
-0.6009	4.619	0.2642	Taf4
0.6355	9.337	0.2642	Apod
-0.7488	5.387	0.2642	Celf4
-1.279	3.753	0.2642	Matn2
-0.4775	5.733	0.2642	Srrt
0.601	5.107	0.2642	Tle1
0.4625	6.282	0.2642	Tanc1
0.9207	7.518	0.2647	Fhit
-0.4187	6.163	0.2658	Gm21988
0.5309	5.258	0.2665	Emc1
0.85	4.488	0.2665	Dtx3
0.7046	4.22	0.2671	Dnah7b
0.9163	7.779	0.2672	Pcsk5
0.373	7.236	0.2672	Tnrc6c
-0.4454	5.505	0.2672	Rexo2
0.64	5.761	0.2672	Ets1
0.4488	5.924	0.2672	Prkdc
-0.4365	7.553	0.2672	Atp13a3
0.5575	5.446	0.2672	Sfmbt1
0.5414	5.304	0.2672	Cwc27
0.4784	5.163	0.2672	Ola1
1.141	6.191	0.2672	Adgrg6
-0.5288	6.05	0.2672	Brd1
0.5055	5.547	0.2672	Pdss2
0.7871	4.567	0.2672	Snx10
-0.5472	4.746	0.2672	Pak1ip1
-1.135	4.711	0.2672	Lum
1.648	3.467	0.2672	Cdh4
0.7468	4.003	0.2672	B4galt4
1.112	4.224	0.2672	Zc3h6
0.6367	7.684	0.2672	Reps2
0.5523	6.144	0.2672	Parp8
0.4668	6.552	0.2672	Ankrd28
0.9211	4.441	0.2672	Orc5
-0.5901	5.583	0.2672	Cdv3
0.5858	5.865	0.2672	Ankrd44
-0.4959	5.914	0.2672	Tmed9
-0.456	7.055	0.2672	Ckap4
-0.4856	5.753	0.2672	Sem1
-0.7936	4.122	0.2672	Edem2
0.4054	7.601	0.2675	Tgfbr1
-0.7429	4.482	0.2675	Sqle
-0.5123	5.006	0.2675	Mrpl48
0.4202	6.377	0.2675	Hexa
-0.8069	3.807	0.2675	Creld1
-0.6398	4.606	0.2675	Ttc1
-0.5038	7.503	0.2675	Ehd3
0.4769	6.916	0.2675	Ncoa1
-0.4411	6.726	0.2687	Gm44503
0.947	3.875	0.2687	Litaf
-0.9564	3.777	0.2687	Mphosph10
0.3542	9.2	0.2687	Nfib
-0.4183	7.352	0.2687	Rplp0
0.5752	5.503	0.2687	Xrcc4
0.5904	5.322	0.269	Ppip5k2
-0.4499	5.207	0.269	Atp6v0b
1.252	4.159	0.269	Rnls
-0.5333	4.982	0.269	Dda1
-0.5508	5.544	0.269	Prpf6
-0.4118	9.052	0.269	Slc7a2
1.145	3.466	0.269	Uhrf1bp1
0.4535	5.795	0.269	Mvb12b
0.5567	4.85	0.269	Prepl
-0.4783	5.598	0.269	Nenf
0.5578	5.626	0.269	Sgms2
-0.5127	5.344	0.269	Mcfd2
-0.7234	4.249	0.269	Cldn12
0.6619	4.48	0.2698	Fbxl12
0.7076	4.545	0.2698	Bscl2
0.4614	7.122	0.2698	Smg6
-0.5141	5.065	0.2698	Sympk
0.6966	5.571	0.2698	Tmeff1
1.171	5.474	0.2698	Enpp2
0.4155	6.722	0.2699	Dyrk1a
0.7489	5.809	0.2699	Kcnb1
-0.6271	4.346	0.2699	Kri1
-0.3602	7.402	0.27	Nktr
1.204	3.848	0.27	Angptl7
-0.4825	6.176	0.27	Thsd7a
-0.4312	6.561	0.2701	Kxd1
-0.5631	8.14	0.2702	Esyt2
-0.4329	5.679	0.271	Ndufa13
0.6204	5.036	0.271	Hsf2
0.8781	5.108	0.271	Atg10
0.5461	7.332	0.2718	Pik3r3
0.4762	6.172	0.2718	Wars2
-0.4645	5.789	0.2718	Uqcrb
0.5399	5.595	0.2718	Pspc1
-0.5821	5.758	0.2727	Sf3a1
1.07	4.234	0.2727	Gucy1a2
0.6866	5.871	0.2727	Gm37240
0.532	5.693	0.2727	Hs2st1
-0.5979	4.956	0.2727	Ubfd1
-0.4142	6.648	0.2727	Eif4a1
-0.5363	4.645	0.2727	Naa60
0.8321	4.34	0.2727	Vamp3
0.4488	5.946	0.2727	Ube2g1
0.8181	5.351	0.2727	Pik3r1
1.184	5.305	0.2727	Camkmt
0.8469	3.984	0.2736	Kctd3
1.171	4.51	0.2751	Nt5dc2
-0.655	5.636	0.2751	Coq10b
-0.4219	6.008	0.2758	Ccdc127
0.4274	6.325	0.2769	Nsmce2
0.7097	4.463	0.2769	Gm45062
-0.423	5.958	0.2769	Dctn1
-0.4669	5.175	0.2769	Papss1
-0.4395	6.056	0.2769	Mtmr6
-0.351	7.314	0.2769	Copa
0.4595	6.32	0.2769	Ewsr1
0.9997	4.176	0.2769	Sugct
-0.6156	6.006	0.2769	Bcam
-0.537	4.541	0.2769	Impdh2
-0.4126	6.372	0.2778	Ap3d1
-0.4	8.02	0.2794	Eif4g1
1.225	3.564	0.2794	Septin4
-0.5321	4.856	0.2794	Me2
-0.4571	10.9	0.28	Ccn3
0.8131	4.201	0.28	Nfatc1
0.3608	6.775	0.2807	Wapl
-0.513	4.642	0.2816	Gart
-0.4825	6.234	0.2819	Gclc
0.4336	7.17	0.2819	Fam172a
0.5742	5.246	0.2819	Fzd6
0.419	5.589	0.2819	Fbxl5
0.4541	6.866	0.2819	Mdfic
-0.5387	5.655	0.2819	Edf1
-0.3913	6.003	0.2819	Atp6v0e
-0.384	6.112	0.2819	Larp4
-0.6646	4.069	0.2819	Jam3
0.362	6.934	0.2819	Dock9
0.5679	4.649	0.2819	Igbp1
0.5312	6.513	0.2819	Gm5089 - ENSMUSG00000115263
0.4944	5.756	0.2819	Zfp618
0.6642	5.264	0.2819	Ptpn3
-0.5183	6.79	0.2819	Rpl19
1.048	4.939	0.2819	Sema3e
0.9995	3.362	0.2824	Ube2s
0.5561	4.793	0.2824	Otulin
-0.5391	5.568	0.2824	Uqcrq
-0.6138	5.551	0.2824	Ranbp1
0.7025	6.271	0.2824	Slc20a2
0.4823	5.424	0.2833	Sav1
0.6699	6.447	0.2833	Col4a1
0.3607	9.201	0.2833	Ptp4a2
0.7756	4.713	0.2833	Cmtm4
-0.5993	4.753	0.2833	Cnpy3
0.6478	5.828	0.2833	Rfx3
0.5259	5.415	0.2833	Rcor3
-0.785	3.822	0.2833	Tomm40
0.6975	7.221	0.2833	Arl15
-0.7672	3.798	0.2833	Mthfd1l
-0.5325	6.149	0.2834	Rps16
0.3796	6.356	0.2835	Arhgap18
-0.5612	4.736	0.2858	Trp53inp2
-0.5476	4.517	0.2864	Sys1
0.4056	7.108	0.2875	Ccnd3
0.4962	5.38	0.2883	Anxa11
0.4412	5.937	0.2884	Erap1
-0.5693	5.111	0.2884	Fam174b
0.5348	5.777	0.2884	Anks1
0.7232	4.087	0.2888	Hibch
0.436	7.07	0.2889	Gdpd5
0.7483	4.546	0.2889	Smim19
-0.7517	3.918	0.2889	Tspan4
0.4903	9.03	0.2889	Klf12
-0.5692	4.783	0.2889	Bag5
0.4165	7.282	0.2889	Ehbp1
-0.5697	4.613	0.2889	Ptdss2
0.6286	5.255	0.2889	Bckdhb
-0.6884	3.856	0.2891	Rrnad1
-0.4064	5.436	0.2894	Akap8
1.708	4.131	0.2894	Ccdc192
0.9572	5.296	0.2894	Skap2
0.965	6.797	0.2894	Rtl4
0.8012	4.948	0.2894	Tbc1d22a
0.5109	5.274	0.2896	Usp40
-0.4338	6.511	0.2899	Cox6c
-0.6897	4.014	0.2899	Polr2e
0.4807	5.394	0.2899	Fbxo38
1.451	3.995	0.2899	9330185C12Rik
0.368	7.104	0.2899	Plekha6
0.8677	4.757	0.291	Naa16
0.6646	5.695	0.2919	Rnf141
0.6486	5.569	0.2919	Dop1b
-0.5156	5.464	0.292	Sec11a
0.6055	6.246	0.2927	Rnf213
-0.4407	5.633	0.2935	Nr2f1
0.7957	4.448	0.2935	Tmem29
0.4332	8.02	0.294	Srgap2
0.9012	3.825	0.294	Ccng2
0.729	4.828	0.294	Gria3
0.6183	5.476	0.294	Glo1
0.5299	6.426	0.294	Bicd1
0.9318	3.739	0.2943	Smyd4
0.5756	5.031	0.2948	Ptgfrn
-0.6246	4.746	0.2959	Ndufa5
0.5682	5.705	0.2965	Tpp1
-0.724	4.851	0.2965	Epb41
-0.3811	6.609	0.2969	Ggnbp2
0.9079	4.144	0.2969	Cirbp
-0.3568	8.023	0.2977	Cdc42
0.6011	4.595	0.2977	Atg4c
-0.4593	7.897	0.2977	Aebp1
-0.3404	7.896	0.2979	Tln1
0.8082	3.916	0.2979	Acad8
0.4919	5.109	0.2979	Bsdc1
0.5284	6.247	0.2979	Eml4
0.4772	5.882	0.2979	Peli2
-0.4801	5.083	0.2979	Ndufa3
1.089	8.305	0.2979	Col23a1
-0.5081	5.504	0.2979	Selenom
-0.5778	4.574	0.2979	Uqcc2
0.632	5.196	0.2979	Dmxl2
-0.3885	6.584	0.2981	Rpn2
0.7509	4.274	0.2984	Gm16759
0.3878	6.148	0.2984	Hnrnpdl
-0.3937	8.817	0.2984	Fstl1
-0.5021	6.19	0.2985	Ddost
-0.5788	4.904	0.2985	Armc1
-0.4383	9.543	0.2991	Hsp90ab1
0.4651	5.566	0.2993	Cbfa2t2
0.65	8.059	0.3001	Bmp5
0.4584	6.434	0.3001	Carmil1
0.336	6.641	0.3001	Vps13d
0.4901	5.924	0.3001	Rnf169
0.4165	8.457	0.3001	Abca9
0.6381	8.698	0.3011	Galnt13
0.4231	6.74	0.3022	Zfp462
0.6312	5.594	0.3022	Atp6ap2
-0.5957	4.508	0.3028	Trappc12
0.4086	6.839	0.3028	Trappc9
-0.377	6.155	0.3028	Tcea1
-0.354	7.297	0.3028	Acin1
-0.4354	8.347	0.3028	Ckb
0.7408	5.207	0.3028	Fnip2
0.7022	4.159	0.3028	Pycard
-0.6774	4.714	0.3028	Abcc1
-0.3721	7.121	0.3028	Nucb1
1.269	4.168	0.3028	Gucy2c
-0.3931	7.63	0.3028	Creb3l2
1.013	4.365	0.3032	Pik3c2b
-0.3599	7.393	0.3032	Hnrnpc
-0.4937	5.605	0.3032	Nus1
-0.6212	4.001	0.3032	0610043K17Rik
-0.7372	4.112	0.3032	Pmvk
0.883	3.803	0.3032	Tmem159
0.6083	4.773	0.3032	Kiz
0.5543	10.08	0.3032	Bnc2
-0.4776	5.015	0.3032	Psmc4
-0.4165	7.295	0.3033	Rpl14
0.4309	9.69	0.304	Slit2
-0.761	7.002	0.3046	Klf2
-0.4406	6.134	0.3046	Mesd
-0.498	5.523	0.3047	Dnajc25
0.7777	4.421	0.3047	Actn2
1.124	4.435	0.3058	Cacnb2
0.5941	6.261	0.3058	Robo2
-0.6194	8.403	0.306	Apoe
0.4101	6.138	0.306	Irf2
0.4371	6.262	0.306	Ezh1
-0.4253	5.919	0.306	Samd4b
0.4084	6.322	0.306	Sidt2
0.5044	7.173	0.306	Slc16a9
0.8715	5.115	0.306	Vegfc
0.6219	6.166	0.306	Mcc
-0.7817	4.177	0.306	Dpagt1
-0.4967	5.083	0.3062	Ntan1
0.5392	4.55	0.3075	Trim23
0.9817	4.461	0.3075	Mthfs
-0.526	5.535	0.3084	Snrpb
0.9645	3.514	0.3084	Zbtb2
0.4146	7.362	0.309	Cask
1.005	3.861	0.309	Eml1
-0.3918	5.867	0.3091	Slc39a7
0.5521	5.402	0.3091	Map2k1
0.4819	5.95	0.3091	Eri3
0.8341	4.401	0.3091	Tor3a
-0.5819	5.781	0.3099	Hspg2
0.6703	4.75	0.3099	Galnt10
-0.4323	6.375	0.3099	Rps6
-0.4361	6.906	0.3102	Os9
0.4835	5.911	0.3113	Zfp516
0.4635	6.844	0.3114	Ep400
-0.4708	5.371	0.3132	Drap1
-0.6671	4.943	0.3136	Nab2
-0.4883	5.076	0.314	Gm31763
0.6082	5.976	0.314	Ppm1l
0.3648	6.579	0.3143	Stk3
0.8046	4.211	0.3144	Cep128
0.9242	5.702	0.3144	Plekhg1
0.861	3.749	0.3144	Sqor
-0.4958	5.44	0.3147	Dusp3
0.4993	5.493	0.316	Abca2
1.338	3.332	0.316	Trim5
0.4928	5.587	0.3175	Ano10
1.115	5.772	0.3178	Dnajc5b
0.541	5.786	0.3178	Slc4a2
0.448	4.968	0.3178	Selenon
0.4303	6.465	0.3178	Clasp1
-0.4759	5.106	0.3181	Gosr2
0.7384	4.505	0.3181	Evc
-0.4935	5.219	0.3184	Psmb2
-0.5737	4.253	0.3186	Cdc26
-0.3931	7.748	0.3186	Rps8
0.8247	4.29	0.3186	Usp13
-0.434	5.629	0.3186	Cox6b1
0.5808	5.825	0.3186	Tmem119
-0.4529	6.855	0.3186	Ywhah
-0.5163	5.816	0.3188	Per1
0.5254	5.036	0.3188	Dusp16
-0.381	6.838	0.3189	Rap1gds1
0.5806	5.529	0.3193	Sh3rf3
-0.7078	4.126	0.3193	Gsdme
-1.023	5.35	0.3193	Per2
-0.5392	4.378	0.3193	Prmt5
-0.5458	4.534	0.3193	Ndufb3
-0.4512	5.576	0.3193	Brd3
0.6495	4.819	0.3193	Socs5
0.4494	6.996	0.3193	D630045J12Rik
-0.3753	6.367	0.3193	Rpl7
-0.4228	5.784	0.3193	Cct5
-0.6091	4.632	0.3204	1810055G02Rik
-0.5096	5.634	0.3205	Tnfrsf1a
-0.3521	7.403	0.3205	Ssr1
-0.4155	7.896	0.3208	Aldoa - ENSMUSG00000030695
-0.4781	6.887	0.3208	Rpl37
-0.3914	6.044	0.321	Anp32b
-0.4534	5.973	0.321	Eif3b
0.4726	6.75	0.321	Ptpn14
0.4906	5.799	0.321	Dym
-0.4881	4.706	0.3218	Ppid
0.5654	5.28	0.3218	Trim12a
0.3197	6.68	0.3218	Cd164
-0.6486	4.362	0.3218	Mien1
0.4175	6.207	0.3218	Kdm7a
-0.5144	5.154	0.3218	Dhx40
-0.4787	4.995	0.3218	Golph3l
-0.5002	4.375	0.3218	Mnt
0.3771	6.507	0.3219	Zmym4
-0.8659	4.043	0.322	Cmya5
0.499	5.901	0.322	Invs
0.5104	5.182	0.322	Usp45
0.4325	5.877	0.322	Gm21992
-0.4551	5.527	0.3226	Txn1
-1.278	4.64	0.3226	Adcy2
-0.4591	6.214	0.3226	Hspb1
0.9539	3.772	0.3226	Cd248
-0.7974	3.667	0.3226	Erich1
1.026	6.102	0.3226	Prmt8
-0.4327	5.347	0.3226	Pxk
0.6495	4.314	0.3226	Cdkl2
0.6317	4.983	0.3226	Isoc1
0.897	4.766	0.3226	Disp1
0.4823	6.516	0.3226	Dennd6a
0.7859	5.738	0.3226	Tln2
0.3858	5.583	0.3229	Srsf4
-0.4526	6.62	0.323	Rps21
-1.081	4.149	0.3234	Pappa
-0.5488	4.393	0.3234	Sh3gl1
0.768	3.824	0.3239	Gtpbp8
0.539	5.289	0.3239	Uggt2
-0.4304	6.633	0.3239	Rps15
-0.4052	5.868	0.3245	Rab8a
-0.5492	4.656	0.3247	Tm4sf1
-0.5594	5.02	0.3247	Eif3g
-0.5532	4.517	0.3247	Yars
-0.9565	7.016	0.3248	Hlf
0.8533	3.771	0.3253	Oxa1l
-0.373	6.145	0.3253	Pdap1
-0.6809	4.113	0.3254	Scand1
0.3407	6.451	0.3254	Nr2c2
-0.6286	3.963	0.3255	Dnaja4
0.4139	8.292	0.3262	Lhfp
0.4302	5.361	0.3262	Ctps2
-0.3934	6.418	0.327	Atp6v1e1
0.7968	4.388	0.3273	Mov10
0.4073	5.642	0.3273	Ccdc91
-0.5893	4.335	0.3289	Bahd1
0.6887	4.288	0.3289	Ppp1cc
-0.405	6.16	0.3289	Hif1a
0.8229	3.855	0.3289	Eng
0.7479	4.49	0.3301	Klf10
0.7364	4.467	0.3301	Hadh
0.7951	4.207	0.3301	Tap2
0.7068	4.64	0.3301	Depdc5
-0.5387	4.249	0.3301	Pias3
0.6022	4.77	0.332	Inpp5f
0.373	6.476	0.3324	Abca3
0.3744	6.398	0.3325	Mgat3
-0.3295	6.682	0.3325	Erp44
-0.6194	3.782	0.333	Gm48099
0.5941	6.673	0.3339	Lrrc8d
0.3671	7.094	0.334	Myo6
0.6268	5.143	0.334	Cdk17
0.3801	9.169	0.334	Trabd2b
0.8607	6.543	0.334	Rnf220
-0.4853	4.92	0.334	Erf
-0.3653	7.974	0.334	Sec62
0.6546	5.107	0.3348	Zbtb37
-0.4762	4.791	0.3348	Nudt9
0.5022	4.892	0.3348	Odf2
-0.5965	3.91	0.3348	Dcps
0.6675	4.218	0.3348	Mr1
-0.6234	4.094	0.3349	G2e3
-0.5477	4.641	0.3349	Mdc1
1.085	3.572	0.3349	Mgmt
0.4695	6.265	0.3349	Mrtfa
0.486	5.014	0.3349	Nhlrc2
-0.6611	4.363	0.3349	Lyar
0.7819	4.993	0.3352	Dpp4
-0.3671	6.792	0.3352	Rps29
-0.4275	5.529	0.3352	Txlna
-0.5154	4.765	0.336	Ttf1
0.3989	6.653	0.336	Kif13a
-0.3188	7.035	0.336	Naca
0.6857	4.239	0.336	Slc30a1
0.6515	4.245	0.336	Gm49267
-0.3113	9.152	0.3367	Lrrc58
0.7643	4.29	0.3368	Ier2
0.5298	4.928	0.3368	Tapt1
0.7084	4.747	0.3368	Sec61a2
-0.4753	6.638	0.3368	Azin1
0.4809	5.516	0.3375	Ppp1r21
-0.3898	5.918	0.3375	Tcp1
-0.3013	7.359	0.3375	Cert1
0.3653	6.342	0.3375	Arnt
-0.5785	4.549	0.3375	Atp8b2
0.8713	3.777	0.3375	Ipo13
0.7213	4.27	0.3379	Ino80dos
0.8171	3.726	0.3379	Pold3
-0.489	5.178	0.3379	Cep295
-0.4014	5.076	0.3379	Dap3
-0.4593	5.556	0.3379	Spty2d1
-0.5191	5.341	0.3379	Adpgk
0.7275	4.055	0.3379	Gm10033
1.149	3.304	0.339	Socs3
0.682	5.569	0.339	Wfdc1
-0.4052	6.49	0.339	Txndc5
-0.5692	4.346	0.3396	Bet1l
0.4238	6.08	0.3396	Elf2
0.5227	7.194	0.3398	Chst11
0.3612	7.156	0.3399	Foxo3
0.5068	6.015	0.3399	Asxl1
-0.3185	7.888	0.3399	Ywhab
0.5873	5.64	0.3399	Mitf
0.4484	8.258	0.3399	Tbx15
0.4872	5.566	0.3399	Slc39a10
-0.4891	5.883	0.3399	Ddx21
-0.3399	7.27	0.3399	Ybx3
-0.44	6.444	0.3399	Rps15a
0.3354	7.033	0.3399	Acadsb
0.7315	4.671	0.3399	Ttll5
-0.3558	7.211	0.3401	Bclaf1
0.5458	5.306	0.3404	Rhobtb1
0.4169	7.042	0.3404	Itgb5
0.6976	3.94	0.3405	Pdk1
0.6797	5.068	0.3411	Gramd3
0.7157	4.099	0.3411	4933431E20Rik
0.5274	5.097	0.3411	Ldah
0.895	3.73	0.3411	Fut10
0.5157	4.936	0.3411	Tpk1
-0.4469	5.396	0.3421	Psmc5
0.3917	8.135	0.3421	Nhsl2
-0.3841	5.617	0.3421	Dbi
-0.4376	6.15	0.3421	Mras
0.7051	4.626	0.3421	Fgf1
0.47	6.53	0.3421	Umad1
0.4403	6.483	0.3421	Fzd1
0.3698	6.246	0.3421	Cpeb4
0.7529	3.848	0.3422	Taf9b
-0.3767	5.41	0.3422	Ibtk
-0.451	5.382	0.3422	Eno1
-0.396	5.712	0.3424	Nudc
0.4243	5.832	0.3424	Pigk
-0.3299	7.059	0.3424	Sec31a
0.9998	3.868	0.3424	Carmn
-0.4263	5.225	0.3429	Nol7
0.7082	4.848	0.3437	Dock6
0.6424	4.214	0.3442	P2rx4
0.6877	4.901	0.3444	Copg2
1.25	4.266	0.3449	Adgrf5
-0.7041	3.859	0.3449	Fam136a
0.6165	5.053	0.3449	Vsx1
0.5681	4.799	0.3454	Zfp362
-0.6765	3.805	0.3461	Snrpd1
0.7713	4.786	0.3461	Cntrl
-0.3707	5.874	0.3461	Ankrd40
-0.5195	4.921	0.3466	Eif3k
0.4601	6.873	0.3471	Zfp521
-0.5924	4.062	0.3471	Bbs2
-0.3314	9.053	0.3471	Fxyd5
0.5358	4.792	0.3471	Abhd4
0.5859	4.417	0.3474	Ttc21b
0.5416	4.394	0.3482	Sfi1
-0.3436	6.854	0.3483	Slc25a3
-0.3324	7.332	0.3483	Scaf11
0.5438	5.444	0.3483	Pde6d
0.3256	6.424	0.3483	Thra
-0.4193	5.538	0.3483	Taok2
0.3116	7.353	0.3483	Senp6
0.5867	6.173	0.3492	Atg4a
0.4248	7.066	0.3492	Dse
0.6539	4.125	0.3492	Etfrf1
-0.3486	6.337	0.3492	Npm1
0.6903	4.406	0.3492	Lrrk2
0.9424	3.966	0.3492	Nfatc4
-0.3872	6.36	0.3492	Cic
-0.4356	5.451	0.3499	Rpl30
1.035	5.207	0.3501	Dnm3
1.119	5.29	0.3501	Plcl2
-0.4625	5.05	0.3501	Aars
0.352	7.536	0.3501	Diaph2
0.9562	4.174	0.3501	Ppp1r9a
-0.4138	6.589	0.3507	Rack1
1.174	3.4	0.3507	Ube2l6
-0.6465	3.932	0.3507	Tex10
0.4794	5.194	0.3507	Snapc3
0.3913	5.881	0.3507	Arhgap12
0.4163	6.369	0.3507	Ctdspl
0.4034	5.895	0.3507	Arhgef6
0.6942	8.766	0.3507	Prkg1
-0.6997	3.65	0.3507	1810014B01Rik - ENSMUSG00000121489
-0.6234	3.773	0.3507	Ccdc71
-0.503	4.402	0.3513	Zfp410
0.6323	4.557	0.3527	Cttnbp2nl
0.3579	6.339	0.3527	Pros1
-0.366	6.292	0.3527	Tardbp
-0.6133	3.976	0.3527	Polr3d
-0.3344	7.84	0.3534	Atp5b
-0.3788	7.05	0.3546	Cd2ap
-0.4959	6.928	0.3551	Palmd
0.7671	4.758	0.3551	Spata6
0.687	5.163	0.3551	St3gal3
0.8176	3.887	0.3551	Traf5
0.5163	5.119	0.3576	Paqr5
-0.7484	4.732	0.3576	Creb3
-0.4132	6.18	0.3576	Prpf38b
-1.741	5.954	0.3576	Or5m3b
0.7855	4.611	0.3576	Wnt9a
-0.6408	3.79	0.3576	Myd88
0.5999	4.547	0.3577	Slc4a7
0.5085	7.892	0.3577	Plxdc2
0.9705	4.705	0.3577	Adamts17
-0.6276	4.191	0.3577	Naa38
0.3458	6.65	0.3577	Fer
-0.3062	7.29	0.3578	Actn4
-0.4116	6.034	0.3578	Hsph1
0.3949	6.589	0.3578	Babam2
-0.3944	5.652	0.3578	Ncbp2
0.5595	4.742	0.3578	L1td1
-0.3972	6.355	0.3578	Rpl28
0.5584	4.916	0.3578	Tab3
0.3456	8.528	0.3578	Fbln1
0.4088	5.507	0.3578	Abcc5
-0.5837	4.363	0.3581	Guk1
-0.3169	6.891	0.3583	Ap2b1
-0.3873	7.024	0.3583	Purb
0.3079	6.693	0.3583	Sacm1l
-0.4761	4.736	0.3583	Zfp507
0.3871	6.465	0.3583	Six1
-0.4645	5.116	0.359	Eif3l
0.5909	5.906	0.359	Ptpru
0.4852	5.214	0.359	Hmgn3
0.8521	3.594	0.359	Apool
-0.3421	7.331	0.359	Cfl1
0.5274	4.429	0.359	Gm20713
0.4095	5.403	0.359	Cstf3
0.3814	6.297	0.359	Lhfpl2
0.5148	5.752	0.359	Klhl24
-0.4289	5.44	0.359	Lbr
-0.6512	4.279	0.359	Obsl1
0.5198	5.712	0.359	Ptpn4
0.5024	5.035	0.3591	Ephb4
0.4167	5.019	0.3604	Tcp11l1
-0.3524	6.695	0.3608	Rpl22
0.5371	4.361	0.3608	Rpgrip1l
1.511	5.822	0.3608	Kcnmb2
1.209	3.928	0.3608	Sema6a
-0.4739	4.481	0.3608	Mmadhc
0.4541	5.258	0.3608	Tbc1d19
-0.3526	7.179	0.3615	Myl12a
0.9288	3.97	0.3623	Ptgr1
0.4454	10.86	0.3623	Foxp1
0.8938	4.248	0.3623	Ier3
0.4957	8.117	0.3623	Ror1
0.4289	6.096	0.3626	Atad2b
-0.4805	5.046	0.3629	Sh3bgrl2
0.4044	7.26	0.3637	Tmem245
0.829	3.828	0.3651	Gm37376
0.7313	4.506	0.3651	Ttbk2
0.3621	6.04	0.3651	Ankfy1
0.4212	7.931	0.3651	Large1
-0.4644	5.122	0.3651	Tgs1
0.6555	4.202	0.3658	Cep63
-0.5533	4.483	0.3659	Cycs
0.5249	5.741	0.3659	Stard8
0.7969	3.623	0.3659	Lrrc8b
-0.3956	5.061	0.3659	Pi4k2a
0.4131	5.42	0.3659	Cfap36
0.5246	4.515	0.3659	Nipa1
0.871	4.504	0.3659	Naalad2
-0.4079	7.341	0.3659	Hnrnpab
-0.7335	4.027	0.3659	Nnat
-0.5493	3.977	0.3659	Churc1
0.3763	5.996	0.366	Ppm1b
0.5695	5.373	0.3664	Lrrc49
0.6247	4.657	0.3664	Vrk2
0.3527	7.311	0.3669	Gpatch8
0.5275	5.158	0.3678	Cept1
-0.6159	4.536	0.3702	Commd8
0.4949	4.931	0.3706	Pigt
0.4086	7.443	0.3707	Ppp1r12a
0.3284	7.082	0.3707	Tnpo1
-0.3063	8.337	0.3707	Tpr
-0.4448	5.434	0.3711	Cox7a2l
0.548	4.868	0.3712	Tbc1d32
0.3116	6.705	0.3713	Ramp2
2.052	6.867	0.3713	Mgat4c
0.5938	4.944	0.3713	Foxd2os
0.7211	4.749	0.3713	Glt28d2
-0.3173	6.664	0.3715	Tor1aip1
-0.3374	7.623	0.3715	Tcf25
-0.4472	6.388	0.3715	Slc25a5
0.4216	5.739	0.3715	Pign
0.3573	5.807	0.3715	Myo18a
0.6839	3.883	0.3715	Mpv17l
-0.3535	6.012	0.3717	Ube2l3
0.4322	5.905	0.3718	Naaa
-0.3764	6.217	0.3718	Psma7
0.5746	4.927	0.3719	Sgpl1
0.3486	6.381	0.372	Zfp609
-0.9561	7.773	0.372	Plcb1
-0.3124	7.318	0.3721	Vcp
0.5072	5.647	0.3721	Zfp704
-0.4466	6.583	0.3721	Nupr1
-0.491	5.222	0.3722	Foxk2
-0.6346	3.951	0.3722	Hic1
-0.6033	4.081	0.3722	Stx2
0.5527	4.601	0.3722	Rbm18
-0.6482	5.042	0.3735	Mgst1
-0.5242	4.904	0.3737	Lpin1
0.5127	6.29	0.3737	Rab30
-0.3126	8.116	0.3743	Ranbp2
0.5803	5.732	0.3746	Ttc7b
0.5815	4.584	0.3748	Retreg2
-0.4539	4.982	0.3748	Rbm10
-0.3571	6.952	0.3748	Rps24
-0.3905	5.277	0.3749	Nqo2
-0.6565	7.894	0.3752	Cavin2
-0.5491	3.972	0.376	Glrx5
0.3439	6.573	0.376	Rsu1
0.4589	5.359	0.376	Card14
-0.6108	4.169	0.3763	Mcoln1
-0.7436	3.883	0.3767	Coro2b
0.3524	5.799	0.3767	Smad5
0.9291	5.223	0.3771	Col4a6
-0.4045	6.487	0.3771	Surf4
-0.2609	8.315	0.3774	Rpl4
0.3984	7.695	0.3776	Arhgap29
-0.4301	5.74	0.3777	Amotl2
-0.315	6.402	0.3777	Lats1
0.3291	7.211	0.3778	Magi3
-0.6091	3.887	0.3778	Pprc1
-0.719	4.309	0.3778	Bub3
-0.3704	5.755	0.3784	Hsbp1
0.327	8.133	0.3784	Tcf12
0.454	4.81	0.3784	Mta1
-0.4106	5.179	0.3785	Thoc7
0.8306	3.98	0.3785	Galc
0.4286	6.843	0.3785	Fam168a
0.3843	6.48	0.3785	Kif16b
0.4988	4.789	0.3785	Heatr5a
0.8607	4.588	0.3785	Cyp7b1
-0.3473	6.315	0.3785	Cox6a1
-0.5641	4.121	0.3785	C1qbp
-0.8289	4.023	0.3785	Psmb5
-0.3515	8.554	0.3785	Lmo4
-0.3959	5.219	0.3785	Ndufb10
0.3428	7.032	0.3785	Btbd9
0.6384	9.443	0.3794	Gja1
0.3858	6.028	0.3799	Rnf115
0.2972	7.268	0.3806	Slc41a1
-0.3551	5.604	0.3806	Chmp2b
-0.3121	6.551	0.3809	Map3k2
-0.5347	4.293	0.381	Dnpep
0.3757	5.53	0.3811	Ccnt2
-0.3752	5.977	0.3822	Rpl35
0.3744	7.292	0.3825	Zeb1
-0.3579	6.637	0.3831	Dnaja1
-0.5816	4.699	0.3831	Atp5e
0.3958	5.814	0.3831	Pon3
0.4202	5.765	0.3831	Taf3
1.066	4.118	0.3831	Wdr13
0.8445	3.45	0.3831	Ifi35
-0.5506	4.875	0.3831	Derl2
0.4178	6.697	0.3831	Ablim1
0.4205	4.79	0.3833	Uqcc1
0.4716	5.201	0.3833	Parp12
-0.3078	6.818	0.3834	Tmem106b
-0.5114	4.556	0.3838	Ing3
-0.4142	5.044	0.384	Anapc13
-0.2833	7.788	0.3844	Msn
0.6214	4.399	0.3844	Icam1
-0.3359	6.402	0.3844	Copg1
-0.3776	5.947	0.3844	Swi5
0.7738	4.685	0.3844	1110019D14Rik
-0.7704	6.49	0.3844	Fam107a
0.8694	3.724	0.3844	Gm37754
-0.442	5.39	0.3844	Nab1
-0.6768	4.122	0.3844	Rhou
2.375	3.472	0.3844	4933406I18Rik
0.7714	5.224	0.3844	2700054A10Rik
0.3147	7.446	0.3844	Tmem135
-0.4954	4.579	0.3844	Vps28
0.6032	4.105	0.3844	Gm20721
0.4236	7.304	0.3844	Prkn
0.7654	5.617	0.3844	Fli1
0.5558	5.342	0.3845	Fap
0.5166	5.661	0.3852	Akap7
0.3616	10.33	0.3853	Fbxl7
-0.3825	6.518	0.3853	Rpl6
0.5533	8.23	0.3853	Dlg2
0.4156	5.788	0.3863	Gna12
0.4007	7.086	0.3863	Marchf6
0.5518	4.557	0.3863	Gpr156
0.4337	8.538	0.3863	Magi2
-0.4762	4.823	0.3863	Ndufa1
0.5789	5.178	0.3863	Herc6
-0.3611	7.113	0.3863	Eif5a
0.4738	5.758	0.3863	Agrn
-0.3534	5.61	0.3863	Cdk16
-0.5082	5.511	0.3863	Atp5d
0.3988	6.529	0.3863	Bbx
-0.4053	5.525	0.3863	Tm2d2
-0.4661	6.019	0.3863	Deptor
1.01	4.019	0.3863	Trim2
-0.3732	6.653	0.3863	Vps35
0.415	5.293	0.3863	D130009I18Rik
-0.4056	5.352	0.3865	Ndufb1
0.6296	4.781	0.3865	Pld3
0.4634	6.05	0.3865	Dgcr2
-0.3335	6.159	0.3865	Mob1a
-0.4162	5.032	0.3873	Cep170b
-0.36	5.461	0.3874	Hnrnpf
-0.3808	5.625	0.3874	Leprotl1
0.3799	8.849	0.3876	Exoc4
0.37	6.098	0.3876	Usp3
0.8938	3.401	0.3876	Ctnnbip1
0.3795	6.664	0.3876	Gli3
0.3829	7.239	0.3876	Jcad
0.5166	4.692	0.3876	Pnma8b
0.8566	3.442	0.3876	Gm20342
-0.5326	4.151	0.3876	Alg11
1.04	3.818	0.3876	Stmn1
-0.6193	4.264	0.3882	Vasn
-0.4369	5.881	0.3883	Cwc15
0.4643	6.596	0.3888	Mcu
0.5274	7.628	0.3895	Tfcp2l1
-0.406	7.884	0.3897	Rplp1
0.6502	5.905	0.3897	Shroom4
0.8046	4.491	0.3898	Arhgap24
-0.4329	5.598	0.3898	Msl1
-2.26	3.006	0.3906	Lzts1
-0.3286	6.938	0.3906	Kcnj2
-0.2922	6.54	0.3906	Mia2
0.4435	5.299	0.3906	Sp4
-0.4696	4.789	0.3906	Gtf2f1
0.3574	7.783	0.3911	Psd3
-0.567	4.179	0.3911	Timm13
0.3785	5.613	0.3915	Cc2d2a
0.6012	4.792	0.3915	Ccdc136
-0.3469	6.147	0.3924	Eef1g
0.5743	4.517	0.3931	Ctso
-0.3104	9.641	0.3934	Gnas
-0.4017	5.435	0.3942	Fis1
0.3744	7.218	0.3942	Foxd1
0.6379	4.824	0.3942	Ttc7
0.5786	6.197	0.3942	Pdzd2
-0.4657	4.558	0.3944	Slc25a44
-0.7325	4.232	0.3953	Slfn8
0.3901	7.634	0.3953	Robo1
0.4635	5.476	0.3953	Chst15
-0.5153	4.683	0.3954	Slc35a5
-0.5973	4.952	0.3957	9930111J21Rik2
0.4352	6.012	0.396	Lyst
0.3834	5.356	0.3968	Decr1
-0.4841	4.422	0.3972	Ikzf5
0.3448	8.39	0.3976	Tgfbr3
-0.4675	4.375	0.3979	Arpc5l
-0.5161	4.259	0.3979	Hpf1
0.3272	6.89	0.3979	Tpcn1
0.9127	3.719	0.3979	Zfp810
0.3946	6.611	0.3985	Ccdc88a
-0.2836	7.637	0.3986	St13
-0.3983	4.955	0.3987	Ncoa7
0.547	4.585	0.3988	Prdm11
0.6733	4.284	0.3994	Mavs
0.4305	8.235	0.3996	Prkag2
-0.445	4.816	0.3997	Prelid1
-0.3219	5.687	0.3997	Cetn3
-0.3499	10.94	0.3997	Ahnak
0.5434	4.237	0.4005	Mbtps2
-0.3437	6.985	0.4009	Pgm5
-0.3308	5.96	0.4009	Krcc1
-0.5836	4.379	0.4009	Akt1s1
-0.2643	8.239	0.4009	Bgn
0.4061	5.206	0.4009	Plaat3
-0.4332	4.953	0.4009	Txndc9
-0.7975	3.879	0.4009	Polr3f
-0.4758	4.326	0.4009	Maf1
-0.6226	4.355	0.4009	Ebp
-0.2508	7.358	0.4009	Kat6a
-0.4379	4.542	0.4009	Ccdc66
-0.4425	5.004	0.4009	Rnf168
0.2908	7.386	0.4009	Bcas3
0.4599	8.086	0.4009	Sgcd
0.6277	4.145	0.401	Ipp
0.9993	4.633	0.401	Pik3ap1
0.5747	4.531	0.4022	Abhd18
-0.3677	5.763	0.403	Smad2
0.372	7.203	0.403	Bbs9
-0.6224	4.038	0.4036	Sdr39u1
-0.2773	8.892	0.4036	Sptan1
-0.298	6.025	0.4037	Fam168b
-0.3573	5.524	0.4037	Iws1
0.5199	5.292	0.4037	Sipa1l3
0.3021	7.958	0.4039	Fut8
0.6467	4.612	0.404	Stx6
0.5009	7.225	0.404	Ptprm
-0.6519	4.778	0.4041	Mtmr4
-0.4341	4.767	0.4041	Pcgf5
0.462	6.203	0.4051	Pip4k2a
-0.3494	6.105	0.4052	1110004F10Rik
0.7704	4.06	0.4053	Gpatch2l
-0.3634	5.977	0.4054	Polr2b
-0.4896	5.015	0.4057	Fbxo9
0.402	5.105	0.4057	Glod4
1.038	4.207	0.4057	Plcg2
0.6144	4.324	0.4057	Rnf144a
-0.4878	4.444	0.4063	Adrm1
0.3745	7.182	0.4063	Stard13
0.404	6.647	0.4073	2210408F21Rik
-0.6387	4.628	0.4074	Pgk1
-0.4408	5.277	0.4086	Midn
0.5808	4.924	0.4086	Asap3
0.4396	5.228	0.4092	Tmem263
-0.2505	7.471	0.4098	Zfr
-0.5038	4.545	0.4098	Htatip2
-0.3736	6.747	0.4098	Rps27a
-0.5572	4.685	0.4098	Papss2
0.403	5.97	0.4098	Gls
1.086	7.125	0.4098	Colec12
0.3277	6.024	0.4098	Apex2
-0.2793	7.747	0.4102	Ankrd11
0.5121	4.808	0.4104	Chst12
0.7525	3.825	0.4104	Gstz1
-0.3219	5.765	0.411	Grsf1
-0.2922	6.884	0.411	Dync1i2
-0.3944	5.099	0.4117	Chpf
-0.5766	4.241	0.4119	Fh1
-0.3546	5.862	0.4121	Supt5
0.6302	4.142	0.4122	Casp12
-0.4467	4.736	0.4122	Adarb1
-0.778	3.59	0.4122	Cd80
0.8885	4.448	0.4122	Tcte2
0.6136	3.991	0.4123	Ufsp2
0.5949	5.35	0.4126	Mylip
-0.328	5.72	0.4126	Psma2
-0.4126	5.016	0.413	Uck2
0.4883	4.481	0.4134	Lrrcc1
0.3691	6.187	0.4137	Strn
0.6314	4.785	0.4138	Mpzl1
-0.5113	4.718	0.4141	ENSMUSG00000121141
-0.3434	5.395	0.4142	Scaf1
-0.3194	8.554	0.4147	Tgoln1
-0.5697	5.192	0.4148	Snrpd3
-0.5434	7.204	0.4156	Mt1
0.8345	3.917	0.4158	Rttn
0.4394	7.45	0.4163	Mark1
0.4693	5.511	0.4163	Fam219a
-0.5977	4.067	0.4163	Atf6b
-0.5117	4.28	0.4165	Chd1l
-0.3548	5.729	0.4167	Gna11
1.094	3.591	0.4167	Cdk6
-0.3642	6.04	0.4167	Arl4a
0.4505	4.988	0.4167	Spast
0.4134	6.191	0.4167	Inpp4a
0.694	4.742	0.4167	Tec
-0.4194	5.01	0.4167	Gm17035
1.368	3.551	0.4167	Fat2
0.3128	6.184	0.4167	Phc2
-0.3652	5.857	0.4167	Ctsa
0.3181	7.339	0.4167	Mbd5
-0.3139	6.301	0.4167	Smap2
-0.4472	5.76	0.4167	Rpl39
-0.4823	4.365	0.4167	Mtrf1l
0.316	8.226	0.4167	Gnaq
-0.309	6.418	0.4167	Selenow
-0.5912	3.952	0.4167	Dpm3
0.3317	5.823	0.4167	Grn
0.3602	6.152	0.4167	Cryl1
-0.494	5.011	0.4174	Srp19
-0.5421	4.22	0.4174	Pelp1
0.3812	8.506	0.4174	Gulp1
-0.4687	4.851	0.4177	Cfap97
0.2848	10.61	0.4177	Zbtb20
0.4067	6.377	0.4182	AW554918
0.6939	4.199	0.4186	Mvp
0.4199	5.493	0.4186	Prkcd
0.6023	3.771	0.4186	Cmc1
-0.5867	4.657	0.4186	Stk40
-0.3779	4.785	0.4186	P4ha2
0.462	4.641	0.4187	Slc31a1
0.6182	3.673	0.4187	Cep70
-0.4251	5.285	0.4191	Hexim1
0.6336	4.114	0.4203	Adgra3
2.474	4.174	0.4203	Slco1a4
-0.5833	4.085	0.4204	2410006H16Rik
-0.6066	4.085	0.4204	Ccdc137
0.4193	5.469	0.4204	Asb3
0.6435	4.172	0.4209	Tmem151a
-0.3547	5.337	0.421	Eif2ak3
0.5305	4.298	0.4215	Dph6
0.4099	4.654	0.4215	2610008E11Rik
0.5323	7.46	0.4215	Pde4d
0.3271	6.711	0.4215	Fnbp1
0.5425	4.088	0.4217	Ralb
-0.3661	5.507	0.4231	Atg3
0.4408	5.319	0.4231	Nectin3
0.4748	4.982	0.4231	Ndufs2
-0.3824	6.285	0.4231	Stip1
-0.5183	4.08	0.4231	Slc27a4
-0.4678	4.497	0.4231	Cox20
-0.3502	6.019	0.4231	Ubl3
0.2907	9.37	0.4234	Celf2
-0.666	4.05	0.4234	Tirap
-0.458	4.899	0.4234	Pdcl
-0.3152	7.086	0.4234	Hmgn1
0.5735	4.261	0.4234	Ercc6
0.5018	4.249	0.4234	Ap5m1
0.4661	6.586	0.4234	Cog5
1.399	3.421	0.4234	Vcam1
-0.3885	5.596	0.4234	Esf1
0.3732	7.184	0.4234	Rhoq
0.4046	5.863	0.4234	Pibf1
0.4857	4.196	0.4234	Armc9
-0.3329	5.454	0.4234	Mat2b
0.3508	6.14	0.4234	Osbpl8
0.4181	4.814	0.4234	Gm7072
-0.4653	4.701	0.4234	Ctbp2
0.249	8.1	0.4241	Lrp6
-0.4771	4.798	0.4242	Hmgn2
0.4142	5.27	0.4242	Usp6nl
-0.3337	6.424	0.4242	Dhx15
-0.3194	5.422	0.4242	Zkscan3
-0.2927	6.312	0.4242	Fkbp3
-0.3909	4.738	0.4258	Psmd13
-0.4904	4.388	0.4272	Atp6v0c
0.3156	8.007	0.4276	Fto
-0.3116	5.945	0.4276	Ehd1
0.2938	6.293	0.4279	Asah1
0.6414	4.241	0.4279	Gtf2f2
0.5744	4.094	0.4279	ENSMUSG00000121477
0.3672	6.41	0.4279	Rb1
-0.3728	5.239	0.4279	Sdhc
0.9945	3.562	0.4288	Dera
-0.3708	5.047	0.4288	Mocs2
0.3186	7.549	0.4288	Klf5
0.3925	5.652	0.4288	Lmbrd2
-0.4405	4.558	0.4288	Bcl7c
-0.4319	5.4	0.4288	Rps28
-0.5294	4.362	0.4288	Rad17
0.4944	4.257	0.4288	Tk2
1.122	4.014	0.4288	Kif5c
-1.033	4.76	0.4288	Cd44
0.5997	4.351	0.4288	Nphp3
1.063	5.08	0.4288	Rims2
0.309	8.096	0.4292	Pid1
1.726	4.97	0.4292	Pde3b
0.6505	4.099	0.4302	Sbno2
-0.4713	4.327	0.4302	Mrpl51
0.8392	3.872	0.4303	CJ186046Rik
0.7915	3.648	0.4304	Gipc2
-0.6336	4.462	0.4308	Ndufb6
0.8719	3.975	0.4309	Zfp788
2.709	3.856	0.4309	Arntl
-0.6464	3.716	0.4309	Kctd5
-1.714	4.687	0.4314	Galnt18
-0.4216	4.888	0.4315	Dele1
0.3194	6.716	0.433	Tmcc1
-0.2999	7.843	0.433	Ezr
0.2602	6.92	0.433	Rabgap1
0.4748	5.48	0.433	Fam135a
0.3902	5.141	0.433	Firre
0.3109	6.842	0.433	Nfkb1
-0.6353	4.444	0.4334	Dnajc6
0.5865	4.166	0.4336	Dcun1d2
0.3453	5.502	0.4338	Adam17
0.8498	3.853	0.4342	4921524J17Rik
-0.3765	4.889	0.4345	Metap1
0.3437	6.137	0.4345	Elp4
0.3289	6.893	0.4345	Phf14
0.3537	5.525	0.4345	Cul4a
-0.3263	5.408	0.4355	Tbca
-0.4572	4.549	0.4355	Mark4
-0.3769	5.381	0.4359	Amot
0.3077	8.352	0.436	Rbfox2
0.5446	4.106	0.4365	Evl
0.5867	4.778	0.4365	Raet1e
0.3208	6.192	0.4365	Tfdp2
0.7677	4.289	0.4366	Tgfb1
0.3867	5.441	0.4366	Trp53bp1
0.6626	3.891	0.4366	Tmem30b
-0.4542	4.831	0.4366	Vps11
0.5574	5.006	0.4366	Rcbtb2
0.4732	5.913	0.4366	Tmem176a
-0.5142	4.835	0.4366	Dnajc9
0.3026	5.849	0.4366	Agtpbp1
1.909	4.06	0.4366	C1qa
0.4255	5.351	0.4366	Mfn1
-0.3956	5.054	0.4366	Uqcrh
0.7197	3.54	0.4366	Slc22a18
-0.4531	5.083	0.4366	Mrpl42
-0.5668	4.022	0.4366	Nek6
-0.5436	3.867	0.4366	Acaa1a
0.5526	5.014	0.4366	Ppp3cc
-0.4568	4.831	0.4366	Tmtc3
0.289	6.265	0.4366	Clip4
-0.4087	4.989	0.4366	Rps27l
0.9743	3.728	0.4366	A730020M07Rik
0.5398	4.01	0.4366	Fam43a
-0.5961	3.921	0.4366	Nfxl1
-0.3865	5.096	0.4366	Dlst
-0.5793	3.86	0.4366	Slx4
-0.3555	4.981	0.4366	Trim28
0.7844	4.642	0.4374	Gm9801
0.7396	4.158	0.4374	Uchl5
0.5058	6.201	0.4374	Cyrib
-0.2442	8.519	0.4374	Prrc2c
0.4	5.56	0.4374	Rngtt
-0.3437	5.215	0.4376	Fundc2
-0.3736	5.945	0.4379	Pcyt1a
0.4279	5.519	0.438	Cyth1
-0.3189	5.537	0.4383	Cstf2
0.4816	5.128	0.4386	Limk2
-0.3371	6.764	0.4386	Crebrf
-0.4642	4.598	0.4387	Timm8b
0.7084	7.148	0.4389	Ednra
-0.5772	4.263	0.4402	Usp36
-0.3863	5.622	0.4407	Csnk1g2
-0.4135	4.641	0.4407	Alkbh8
0.7351	7.599	0.4413	Col8a1
0.9623	3.853	0.4413	Gng2
0.5206	4.959	0.4418	Serinc5
-0.3257	6.853	0.4427	Ppia
0.3758	6.915	0.4429	Rreb1
-0.4864	4.328	0.4432	Dph3
0.369	4.958	0.4453	Spg7
0.3764	6.707	0.4456	Lpgat1
-0.6502	4.344	0.4456	Gmppa
-0.3748	5.136	0.4456	Mmgt2
-0.5	4.217	0.4456	Tecpr2
-0.3128	6.288	0.4456	Myo1c
0.5815	4.196	0.4456	Zfp606
0.4713	4.897	0.4456	Dcaf11
0.7153	4.344	0.4456	Pced1b
0.363	5.639	0.4456	Lix1l
0.7559	7.466	0.4456	Mmp16
-0.2869	7.584	0.4458	mt-Nd4
-0.4608	4.226	0.4472	2310011J03Rik
0.5982	4.249	0.4472	Exoc6
-0.4991	3.994	0.4472	Dzip1l
0.4256	7.149	0.4473	Spats2l
0.4087	5.167	0.4474	Gm20696
0.492	5.255	0.4474	Cbfb
-0.3349	6.34	0.4474	U2surp
-0.2709	7.595	0.4474	Cbx5
0.6958	5.015	0.4477	Rigi
0.5632	3.995	0.4478	Gzf1
-0.474	4.258	0.4482	Atxn7l3
0.8213	8.143	0.449	Pde7b
0.5139	7.045	0.449	Slc9b2
0.4066	5.967	0.4501	Marchf3
-0.4611	4.699	0.4504	Hdac3
-0.4399	4.763	0.4504	2310022B05Rik
0.3553	5.609	0.4506	Pea15a
0.6944	3.954	0.4506	Nup155
0.5533	4.25	0.4506	Timmdc1
0.6245	3.727	0.4512	Ccdc125
-0.506	4.006	0.4512	Abracl
-0.3718	4.855	0.4514	Pdp1
-0.5317	3.92	0.4514	Yif1a
-0.3749	5.122	0.4514	Itpripl2
1.245	4.249	0.4514	Pvt1
-0.4181	5.327	0.4514	Ndufa2
0.3302	5.486	0.4514	Rnf214
-0.3099	5.707	0.4514	Qrich1
-0.329	5.381	0.4514	Cse1l
-0.5339	4.761	0.4514	Ccdc34
-0.3606	6.043	0.4514	Csrp1
0.4249	5.91	0.4518	Plxnc1
0.6128	4.161	0.4527	Bend6
-0.4122	4.595	0.4527	Bcat2
0.2878	7.825	0.453	Nme2
0.4176	6.066	0.4531	Hipk2
0.3923	5.279	0.4538	Fech
0.3305	8.048	0.4538	Antxr1
2.276	4.605	0.4538	Flt1
0.3569	5.606	0.4538	Rab31
0.4165	5.05	0.4538	Eif2ak4
-0.4584	4.408	0.4542	Tmem115
0.4448	4.357	0.4545	Pofut1
-0.3629	5.276	0.4546	Brap
-0.3491	5.224	0.4546	Srp9
0.2744	9.91	0.4546	Lrp1
0.6128	5.32	0.4554	Retreg1
-0.4021	6.56	0.4567	Xdh
-0.3716	7.398	0.4567	Tpm4
-0.5415	4.092	0.4567	Vars
-0.4148	4.686	0.4577	Tomm7
0.2942	6.32	0.4595	Ccni
0.7148	3.753	0.4601	Ces2g
0.4052	6.329	0.4602	Smarca1
0.9445	3.404	0.4603	Ccdc148
0.4702	4.154	0.4603	Entr1
-0.4854	4.002	0.4605	Scnm1
-0.4127	5.205	0.4605	Gpr108
0.6232	4.668	0.4605	Galnt7
-0.3484	5.974	0.4605	Ubxn2a
-0.5016	4.275	0.4605	Cwc25
-0.4855	4.134	0.4605	Capn15
0.6149	3.653	0.4623	Rpf1
-0.2411	8.018	0.4623	Septin7
-0.4135	4.473	0.4626	Dbt
0.8615	4.088	0.4627	Tram2
-0.2939	5.949	0.4627	Psmc3
-0.3582	5.105	0.4627	Zfp62
0.2955	7.344	0.4628	Abca1
-0.441	4.866	0.4629	Msl3
0.3583	5.899	0.4637	Cdk19
-0.3938	4.877	0.4637	Psmb3
0.6231	4.579	0.4637	Col5a1
-0.5181	4.044	0.4637	Actl6a
-0.2787	6.345	0.4637	Zc3h7a
0.4813	4.482	0.4637	Gpd1l
0.6946	3.837	0.4644	Kdm2b
0.2777	8.054	0.465	Baz2b
-0.4393	4.475	0.4651	Gpatch1
-0.4497	6.554	0.4651	Zhx3
0.269	7.577	0.4651	Tbl1x
-0.3139	5.964	0.4651	S100a11
-0.5048	3.996	0.4651	0610030E20Rik
-0.4259	4.841	0.4651	Keap1
-0.7436	4.337	0.4651	Ahnak2
0.4469	4.601	0.4651	Man2a2
1.154	5.82	0.4651	Slc47a2
0.6361	3.612	0.4651	Mthfd2l
0.3079	6.188	0.4651	Rbm33
-0.3355	5.658	0.4651	Tfg
0.6564	4.262	0.4663	Mxra7
0.6344	3.841	0.4663	Cyb5r1
0.6508	4.558	0.4663	Mcph1
-0.3388	5.884	0.4663	Chchd2
0.2971	6.983	0.4666	Pld1
-0.4799	4.054	0.4667	Rhog
-0.4643	4.203	0.4667	Eif2b5
0.3858	6.089	0.4667	Pnrc1
0.3229	5.862	0.4672	Tmem87a
-0.5406	3.95	0.4687	Leng1
-0.3987	5.437	0.4689	Sec23ip
-0.4456	4.204	0.4694	Sumo2
0.4294	5.2	0.4694	Sfxn2
-0.4828	4.649	0.4694	Mcm4
0.5483	5.048	0.4694	Dusp10
0.449	4.288	0.4694	Selenoi
0.407	4.758	0.4694	Rab35
0.3371	5.597	0.4694	Orc4
0.4141	7.178	0.4696	Dlc1
0.5073	4.537	0.4705	Dcakd
0.5068	4.644	0.4705	Slc22a15
0.2888	7.689	0.4715	Ston1
-0.3204	5.223	0.4715	Nxf1
0.3786	6.336	0.4715	Fhip1a
0.7759	4.442	0.4715	Zfp438
0.5452	3.99	0.4718	Gm11266
-0.321	5.743	0.4718	Sod1
-0.3998	5.053	0.4718	Ndufc1
-0.3839	4.979	0.4718	H2aj
0.4518	5.405	0.4718	A4galt
-0.3278	6.654	0.4721	Pfn1
0.3691	4.813	0.4722	Nadk2
-0.543	4.007	0.4728	Lss
0.3187	7.096	0.4731	Pls3
0.3398	5.792	0.4731	Glce
-0.3877	5.699	0.4732	Ddx1
-0.7413	3.68	0.4735	Ccnd1
0.3606	6.402	0.4738	Cdkal1
-0.4724	4.079	0.4738	Tbccd1
0.3687	5.015	0.4738	Rnft1
-0.3258	17.76	0.4742	Rn18s-rs5
0.4476	4.249	0.4742	2810403D21Rik
0.4034	5.969	0.4742	Plcb3
0.4499	5.432	0.4742	Garem1
-0.4022	4.939	0.4742	Bccip
0.3292	6.003	0.4742	Abat
0.2488	8.346	0.4742	Ptms
0.4155	4.926	0.4744	Carhsp1
-0.3223	5.426	0.4744	Otud6b
-0.3019	5.712	0.4744	Nacc2
0.5205	5.741	0.4744	Peak1
0.3459	5.271	0.4744	Extl2
0.3779	5.053	0.4746	Pfkfb2
-0.3534	5.152	0.4749	B3glct
-0.2984	7.144	0.4752	Mon2
-0.284	6.978	0.4752	Ppp2ca
-0.311	6.112	0.4752	Bcl9l
0.5448	4.422	0.4752	5730455P16Rik
-0.5439	4.133	0.4752	Arsa
0.5894	3.875	0.4752	Ifngr2
0.4038	7.185	0.4752	Nalcn
-0.4246	4.627	0.4752	Ccdc71l
-0.3131	6.206	0.4752	Ndufa4
-0.4381	4.262	0.4752	Katna1
0.2459	7.309	0.4752	Tapbp
0.2861	7.535	0.4752	Tcf20
0.2652	7.516	0.4752	Clstn1
-0.489	4.948	0.4752	Gm10134
-0.2768	6.599	0.4752	Etf1
-0.3427	5.742	0.4752	Hdac1
-0.4586	4.676	0.4752	Tsr2
-0.4287	4.429	0.4752	Mrps24
0.6643	11.4	0.4758	Igfbp5
0.5144	4.412	0.4762	Kif21a
0.3548	8.184	0.4762	Zbtb7c
-0.7267	4.292	0.4762	Prkg2
0.5376	4.932	0.4762	Adcy6
0.4203	5.277	0.4762	Sucla2
-0.4617	3.995	0.4762	Asb8
0.5327	4.272	0.4764	Casp8
-0.355	4.84	0.4766	Smndc1
0.3456	4.941	0.4766	Brwd3
-0.5338	3.987	0.4766	Phf5a
0.3246	9.719	0.4766	Cped1
-0.3103	6.99	0.4766	Smarca5
-0.6019	4.11	0.4775	Fgf2
-0.5428	4.04	0.4778	Pfdn2
0.3762	5.471	0.4778	Dnajb12
0.4372	4.835	0.4783	Dlg3
0.6028	4.063	0.479	Zdhhc15
0.3406	6.788	0.479	Dcaf6
-0.3658	5.245	0.479	Vti1b
-0.4773	4.171	0.479	Plekhh3
0.4775	4.393	0.479	Ganc
-0.3962	5.531	0.479	Ecm2
-0.9983	6.039	0.479	Coch
0.5532	5.31	0.479	Reps1
-0.5105	3.881	0.479	Phkg2
0.3814	5.466	0.479	Hsd17b4
0.5201	4.047	0.479	Eef2k
0.3768	5.611	0.4792	Pclo
-0.5148	5.042	0.4797	Zfp110
0.7763	3.726	0.4811	Rab27a
-0.5597	3.928	0.4811	Ddx49
-0.3212	5.153	0.4813	Srebf1
-0.3391	5.907	0.4813	Sf3b3
-0.3033	6.099	0.4815	Zfp36l2
0.4622	4.92	0.4818	Wdr44
-0.4362	5.447	0.4824	Tnfaip1
0.3222	5.607	0.4827	Atm
0.4245	5.013	0.4828	Aifm3
-0.3417	5.8	0.4828	Pkig
-0.3566	4.969	0.4829	Smim7
-0.2419	6.824	0.4829	Copb1
0.3789	5.406	0.483	Mdn1
0.23	8.216	0.483	Mef2a
0.3169	5.392	0.4832	Slc25a17
0.3384	13.74	0.4832	Malat1
-0.2356	7.576	0.4832	Zfp106
0.5425	4.107	0.4842	Pot1a
-0.4599	5.269	0.4846	Med27
0.3351	5.848	0.4846	Avl9
0.2871	5.908	0.4846	Ubxn7
-0.3279	5.263	0.4846	8030462N17Rik
-0.3739	4.841	0.4846	Stk25
0.4496	4.744	0.4846	Ulk1
-0.2968	6.319	0.4846	Atn1
-0.3251	5.075	0.4846	Gid4
0.6031	4.167	0.4846	Hacd1
0.3388	7.424	0.4849	Htra3
0.3776	5.007	0.4851	Mapk8ip3
0.5571	3.689	0.4851	Mettl21a
-0.5035	4.047	0.4851	Pacsin3
-0.3995	4.844	0.4851	Cyc1
0.3612	7.076	0.4851	Tbc1d5
[truncated: 55,011 more rows]

## Sheet: DE-7_Microglia
logFC	AveExpr	p_val_adj	gene_names
-7.028	6.116	4.753e-12	Atp8a2
2.249	9.703	2.531e-09	Arsb
1.468	9.036	8.219e-07	Wwox
-4.521	2.963	1.81e-05	Gm43821
-1.372	7.488	1.81e-05	F11r
-5.576	2.843	3.993e-05	Mpp7
-2.518	4.5	6.291e-05	Rpl29
3.242	5.821	7.407e-05	Nme7
-3.971	3.74	0.0001726	Samd4
-1.391	7.843	0.0002025	Stab1
1.321	7.636	0.0002025	Xpr1
-1.534	5.622	0.0003026	Sh3bgrl3
-2.119	4.384	0.0003578	Ang
0.9094	7.994	0.0004271	Peli2
-2.206	5.82	0.0004444	Gm45837
0.8614	9.442	0.0004444	Cadm1
-2.294	4.491	0.0004444	Ptprb
-1.168	7.07	0.0004871	Rpl13a
2.696	4.944	0.0005945	Qsox1
1.63	7.152	0.0005945	Srgn
-5.587	5.312	0.0007586	Mrc1
1.863	7.488	0.0007586	Neat1
1.081	8.15	0.0008204	Ssbp2
1.141	6.784	0.0009334	Ipcef1
-2.799	4.354	0.0009334	Ahnak
-1.501	5.452	0.0009334	Ecscr
-1.036	6.347	0.0009984	Crybb1
-3.513	4.998	0.0009984	2610035D17Rik
0.9492	9.141	0.001069	Klf12
1.306	7.045	0.001134	Mapre2
-1.299	5.801	0.001251	Ide
4.124	5.263	0.001255	Colec12
0.8826	7.993	0.001259	Chst11
0.9729	8.897	0.001259	Fgf13
-1.912	4.764	0.001277	Sult1a1
1.049	7.776	0.001277	Pfkfb3
-1.142	5.994	0.001277	Nhsl2
-1.021	6.606	0.001277	Iqsec2
0.5902	11.09	0.001368	Tmcc3
-2.199	4.878	0.001447	Slco1a4
1.414	5.849	0.001469	Tom1l1
-1.546	5.284	0.001833	Ms4a6b
-1.424	5.547	0.001853	Ablim1
-1.262	6.795	0.001853	Rpl23
0.6052	11.83	0.002024	Plxdc2
-2.131	4.193	0.002358	Nebl
1.137	7.525	0.002358	Gpr183
-0.6985	8.958	0.002358	Maf
0.816	8.601	0.002464	Rab8b
-2.186	3.932	0.00262	Cp
-1.372	6.005	0.002679	Gbp7
0.6108	10.78	0.002679	Plcl1
0.8034	7.623	0.002729	Atg10
-1.878	4.13	0.002857	Zfp862-ps
1.176	6.161	0.003164	Dcakd
0.9602	7.712	0.00317	Rhoh
1.704	7.21	0.003215	Sgk1
0.7861	8.542	0.003225	Kcnma1
-1.333	5.137	0.003333	Arsk
-1.89	4.716	0.003359	Plcb1
0.9134	8.074	0.003387	Slc15a3
0.6084	9.411	0.00368	Large1
-1.479	4.723	0.003725	Tgfbi
2.927	4.354	0.003851	Sfmbt2
0.4723	13.77	0.003913	Malat1
0.7571	9.075	0.004091	Dennd4a
0.712	7.905	0.004106	Tnfrsf21
0.8632	8.066	0.004152	Kcnk13
-1.142	11.19	0.004399	mt-Rnr1
-0.7193	6.828	0.005035	Kif13a
0.6057	9.418	0.005243	Cacnb2
1.06	9.682	0.005368	Plek
-1.16	5.167	0.006002	Mrc2
0.5895	8.712	0.00606	Arl15
1.788	5.108	0.006214	Fhad1
0.7463	7.574	0.006221	Rasal2
-1.702	4.732	0.007231	S1pr1
-2.338	3.979	0.007994	Fn1
-1.058	5.738	0.008232	Rpl31
-0.859	6.038	0.008977	Gabarap
0.9984	6.714	0.008977	Ust
-1.563	4.537	0.008977	Mrps15
1.13	7.537	0.008977	Akt3
0.9371	7.199	0.008977	Hnrnph1
0.8266	8.623	0.008977	Cd86
0.779	7.51	0.008977	Sdcbp
0.7108	8.684	0.008977	Rtn1
-1.156	5.647	0.008977	Rps17
-1.21	5.767	0.009056	Cox4i1
0.5727	8.79	0.009056	Ccr5
-1.833	5.836	0.009174	Sptbn1
0.5634	8.336	0.009306	Efhd2
1.732	6.219	0.009306	Dnajb4
-0.5911	8.376	0.009306	Gdi2
-0.8673	6.911	0.009306	Rpl21
1.264	6.433	0.0101	Azin1
1.01	6.132	0.0101	Gm49342
2.438	4.594	0.0101	Gm10138
-1.13	5.105	0.0101	1110002L01Rik
0.7869	7.483	0.01011	Sat1
1.566	6.027	0.01013	Rad51b
-1.308	5.049	0.01032	Fam3c
0.512	9.312	0.01032	Gnaq
0.5763	8.107	0.01032	Tbc1d16
-1.191	6.323	0.01032	Rps29
0.7652	7.499	0.01032	Samsn1
-0.7728	6.311	0.01032	Il15
-0.9529	6.609	0.01036	Rps23
0.9647	6.701	0.01053	Nlrp3
1.151	7.326	0.01053	Btg2
-0.8171	5.925	0.01079	Il16
1.434	6.913	0.0113	Mapkapk2
-1.584	3.829	0.01146	Dcbld2
-0.7483	7.262	0.01158	Abcc3
-1.15	4.712	0.01158	Vash1
1.022	7.237	0.01168	Mir142hg
1.606	5.846	0.01194	Slc25a25
-1.139	5.547	0.01238	mt-Nd2
-0.6794	6.776	0.01261	Ostf1
-0.8544	7.046	0.01275	Pdia6
0.901	6.764	0.01319	Smad7
1.029	6.53	0.01369	Tra2b
2.838	6.732	0.0143	Fos
1.018	6.968	0.01445	Evi2
2.39	4.849	0.01445	Socs3
0.5282	8.618	0.01471	Lims1
-0.7765	8.758	0.01486	Fth1
-1.586	4.476	0.01504	Mb21d2
-1.02	6.801	0.01504	Rplp1
2.402	3.746	0.01504	Gm12610
-0.9811	6.792	0.01504	Rpl18a
0.6636	7.677	0.01504	Aim2
0.6211	8.151	0.01504	Fus
-0.5205	10.58	0.01504	Selenop
-1.202	5.018	0.01504	Hip1
-0.9279	8.432	0.01504	Prkce
1.21	5.762	0.0154	B3gnt2
-1.228	5.922	0.01567	Rpl23a
-0.6512	9.964	0.01619	B2m
1.718	5.04	0.01635	Nrbf2
0.9685	6.107	0.01635	Abcb1b
-2.158	5.213	0.01635	Flt1
0.592	7.983	0.01635	Peli1
-0.6703	6.762	0.01668	Ggta1
1.995	6.978	0.01671	Rasgef1b
-0.8505	6.097	0.01707	Oip5os1
-0.9636	5.959	0.01717	Rps27
-0.5232	8.372	0.0178	Slc7a8
-0.4229	9.459	0.01791	Lpcat2
-1.237	4.706	0.01793	Rpl36
1.253	6.134	0.01827	Fggy
1.204	5.864	0.01831	Taf1d
1.215	6.532	0.0189	Ppp1r10
-1.819	5.715	0.0189	Rps3a1
0.7115	7.865	0.0189	Lrrc8d
0.8348	6.543	0.0189	Tspan13
-0.6223	7.709	0.0189	P2rx7
-0.5847	7.496	0.0189	Pak2
0.8718	7.406	0.0189	Chd2
-0.8866	6.547	0.01913	Gas6
-1.125	4.984	0.01934	Actn1
-0.4312	10.23	0.01976	Itm2b
-0.8083	12	0.0198	mt-Rnr2
0.4733	11.07	0.0198	Maml3
0.7271	7.496	0.02001	Clip1
-2.154	5.216	0.02001	C5ar2
-1.733	4.309	0.02001	Clcf1
-2.009	5.448	0.02001	Kitl
1.006	6.481	0.02001	Vmp1
1.613	5.114	0.02001	Ets2
0.8214	6.144	0.02001	Hnrnpdl
0.4883	9.736	0.02001	Plxna4
-0.4809	9.404	0.02042	Abca9
-1.069	4.975	0.02052	Psd3
-1.068	6.006	0.0212	Rpl11
-0.9988	6.396	0.0212	Rpl13
-1.307	4.076	0.0212	Atat1
1.244	6.902	0.0212	Klf6
-0.9227	5.315	0.0212	Zfp398
-0.5051	7.695	0.02125	Aftph
1.171	6.482	0.02126	Mat2a
-0.8432	6.043	0.02168	Ikzf2
0.8329	6.841	0.02179	Tent5c
0.9562	6.741	0.02179	Btg1
-0.5996	6.752	0.02212	Yy1
0.8947	6.764	0.02241	Rab43
-0.6172	7.368	0.02255	Tm9sf2
0.5629	8.386	0.02255	Cables1
-1.211	4.804	0.02255	Atp1a2
0.6812	7.424	0.02255	Nlrp1b
1.497	5.492	0.02255	Cbx4
1.863	5.763	0.02255	Ube2e2
0.9865	6.496	0.02257	Bcl2a1b
1.265	5.393	0.02269	Tagln2
0.7165	6.646	0.02269	Naalad2
1.049	8.86	0.02269	Hdac9
-0.8272	5.514	0.02269	Dusp7
-0.7491	6.364	0.02269	Pdzd8
-0.6873	6.706	0.02291	mt-Cytb
-0.6417	6.85	0.02341	Ap1b1
1.138	5.431	0.02343	Mrps6
0.6136	8.268	0.02392	Arhgap25
-1.082	5.456	0.02417	Plp1
-0.8388	6.985	0.02417	Rps4x
1.563	4.111	0.02496	Cdk5rap1
-0.9181	5.026	0.02496	Gm2245
-0.5391	10.13	0.02502	Selplg
0.6676	6.938	0.02525	Usp12
-0.771	5.802	0.02529	Rps2
0.452	8.392	0.02671	Gna12
-1.081	5.545	0.02675	Kxd1
-0.975	5.128	0.02699	Ntm
-0.9511	5.532	0.02739	Rpl35a
-0.8476	5.568	0.02739	Lpin1
0.7716	7.297	0.0274	Tspan7
-0.9195	5.21	0.02838	Cast
-1.041	4.924	0.02838	Smo
-0.6737	6.798	0.02849	Tmem50a
-1.291	4.492	0.02849	H2-DMb1
0.9433	7.029	0.02849	Pea15a
0.69	7.111	0.02876	Srsf5
-0.8892	6.722	0.02876	Fau
-0.6802	5.979	0.02922	Tsga10
0.6255	8.017	0.02949	Ddx3x
-0.9264	5.759	0.02949	Mllt3
-1.07	5.119	0.02949	Eif3d
0.7262	6.765	0.02969	Zc3h7a
-0.8166	5.457	0.03025	Zfp518a
-1.644	4.988	0.03027	Itsn1
1.78	5.726	0.03076	Cited2
-1.026	4.976	0.03076	Afdn
1.322	6.159	0.03096	Tagap
1.574	4.558	0.031	Gm44710
0.3393	11.02	0.031	Ldlrad4
-1.559	4.07	0.031	Ms4a6c
0.7409	7.689	0.031	Apbb2
0.5678	7.917	0.03137	Nptn
0.732	6.327	0.03137	Padi2
-0.7177	6.185	0.03137	Cr1l
-0.9626	5.235	0.0315	Nolc1
0.6179	7.664	0.0315	Zfp36l1
-0.7895	5.968	0.03235	Nr1d2
1.158	6.131	0.03245	Arrdc3
-0.6426	6.787	0.03288	Washc2
-1.183	4.802	0.03288	Meis1
-1.011	4.788	0.03288	Sdhc
-0.7508	5.611	0.03295	Rbm28
-0.6694	6.626	0.03295	Rab6b
-0.6119	8.402	0.03306	Cd84
-0.7597	5.623	0.03339	Arl5a
1.068	6.086	0.03339	2210408I21Rik
-0.7202	6.103	0.03341	Bltp2
0.3738	10.08	0.03455	Gab2
-1.106	4.699	0.03471	Tpm1
0.3784	9.533	0.03482	Ptprc
1.392	5.449	0.03482	Rabgef1
-0.3966	8.239	0.03486	Lcp2
1.308	5.669	0.03495	Chka
-1.038	4.922	0.03495	Atpif1
-1.675	4.443	0.03511	Ccdc192
0.7426	6.411	0.03517	Ahdc1
-1.155	4.142	0.0359	Zfp790
-0.8749	5.871	0.0359	Rpl12
0.4054	9.137	0.0359	Tbxas1
-1.488	4.764	0.03619	Rpph1
-1.055	5.927	0.03657	Rbfox1
-0.5657	6.845	0.03657	Rc3h1
0.4109	9.015	0.03657	Skap2
-0.532	12.09	0.03657	Cst3
0.4727	9.815	0.03657	Snx29
0.8181	8.526	0.03657	Lncpint
-0.9955	5.915	0.03657	Rpl41
0.4514	8.662	0.03657	Chd7
1.084	6.259	0.03657	Fam107b
0.451	8.843	0.03657	Zfand3
-0.5106	8.357	0.03657	Fcgr3
0.8173	5.902	0.03684	Tmem64
1.063	5.982	0.03694	Csnk1g3
-1.618	5.476	0.03728	Zfp984
-1.182	4.775	0.03767	Fyn
0.9296	7.287	0.0379	Rel
-0.6302	6.071	0.03799	Zdhhc5
-0.4533	7.633	0.03819	Taok1
-0.8852	5.546	0.03838	Rps20
-1.203	4.203	0.03966	Luzp2
1.95	3.958	0.04067	Rasgrp4
0.8921	5.914	0.04067	Srsf7
-0.7669	6.236	0.04084	Il10rb
-0.8244	5.008	0.04106	Prpsap1
0.8432	6.2	0.04129	Magi3
-0.5279	7.343	0.04131	Tpr
2.227	6.803	0.04131	Nrxn1
-0.6783	6.662	0.04158	Nav1
0.7227	6.283	0.04158	Trp53
1.064	6.054	0.04158	Ier5
-0.6807	6.07	0.04158	Notch1
2.327	6.659	0.04173	Nfkbiz
1.572	5.754	0.0419	Ddit3 - ENSMUSG00000025408
0.5211	7.971	0.04289	Map4
0.4484	8.817	0.04298	Pard3b
1.22	6.192	0.04338	Gcnt2
-0.9819	6.42	0.04338	Tpt1
-0.5119	7.362	0.04345	Tnfrsf1b
-0.4941	7.683	0.04347	Pld4
1.435	4.679	0.04347	Rbm3
0.6512	6.739	0.04347	Acox3
-0.6208	6.447	0.04358	Irf2bp2
1.244	5.439	0.04418	Igsf8
0.5612	7.169	0.04421	Setd3
1.905	4.196	0.04459	Nasp
0.4888	9.231	0.04459	Smyd3
-1.471	5.686	0.04459	PTPRG
-0.8545	5.737	0.04459	mt-Nd5
0.4124	9.177	0.04462	Basp1
1.23	5.004	0.04469	Cd52
-0.4639	7.858	0.04507	Sort1
0.6801	6.402	0.04521	Pcf11
-0.9431	5.101	0.04549	Pygb
0.4861	8.476	0.04549	Ctsc
-0.9484	4.949	0.04549	Pcdh9
0.4875	7.765	0.04557	Gcnt1
-0.8182	6.782	0.04634	Slc12a2
-0.7474	5.357	0.04669	Slc35a5
-0.926	5.524	0.04669	Rpl34
1.742	5.77	0.04669	Bcl6
0.4086	8.408	0.04697	Myo1f
-0.7579	5.47	0.04698	Prkcsh
-0.9337	5.317	0.04698	Rps16
2.157	4.524	0.04698	Tiparp
0.4286	8.348	0.04698	Ptpra
1.772	4.991	0.04698	Mafk
-0.9969	5.693	0.04698	Rps18
-0.7472	6.074	0.04754	Rps27a
-0.9003	4.733	0.04808	Tmub2
1.255	4.402	0.04868	Arhgap27os3
-0.5269	6.814	0.04871	Ociad1
0.5539	7.659	0.04913	Fnip1
0.4061	8.126	0.04955	Dnmt3a
0.5063	7.485	0.04955	Eif4a2
0.4109	7.903	0.04955	Rtn3
1.223	6.528	0.04955	Plekho2
-0.7188	6.708	0.04955	Gapdh
-0.5147	6.825	0.04955	Sel1l
-0.6937	5.401	0.04955	Uba2
-1.048	5.103	0.04982	Rps10
-0.7008	6.637	0.04992	Rps3
-0.687	5.939	0.04992	Irgm2
1.31	5.851	0.04992	Sub1
0.468	8.462	0.04992	Cd53
0.381	12.06	0.04992	Nav2
-1.237	4.751	0.04998	Syne1
-0.6056	6.387	0.0505	Fgfr1op2
1.055	5.403	0.05071	Lrguk
-0.8603	5.99	0.05071	Pxk
1.275	7.205	0.05071	Zfand5
-0.6895	6.384	0.05071	Nfe2l1
-1.16	4.322	0.05071	Trpm3
1.244	6.935	0.05083	Tmx4
-0.7354	7.215	0.05128	Bsg
-0.6907	17.34	0.05143	Rn18s-rs5
0.4943	8.546	0.05143	Apba1
1.312	5.318	0.05167	Cmtm8
0.5568	6.903	0.0518	Rsu1
0.3753	9.756	0.05218	Rapgef5
1.039	5.503	0.05218	Plk3
-1.136	5.049	0.05218	Rpl36a
-0.5759	6.754	0.05241	Purb
0.7292	6.796	0.05241	Atp7a
0.6177	7.3	0.05241	Atf6
1.185	5.063	0.05254	Zfp729a
-0.424	9.429	0.05259	Cfh
0.6815	6.915	0.05301	Garnl3
-0.6551	5.667	0.05301	Smad5
2.753	5.037	0.05313	Ppp1r15a
-0.9187	4.859	0.05313	Pom121
-0.4798	7.714	0.05375	Mafb
1.761	5.417	0.05375	Tgif1
1.729	7.584	0.05376	Il1a
-0.4788	7.667	0.05387	Kmt2d
-0.5521	6.617	0.05425	Ckb
-0.6357	5.674	0.05428	Tcea1
0.3297	9.48	0.05436	Abhd12
-0.5544	6.679	0.05476	Xpo7
1.323	4.466	0.05535	Srpk1
0.9175	5.864	0.05535	Tiam1
-0.3494	10.3	0.05576	Serinc3
-0.6144	5.866	0.05576	Gcn1
-0.615	6.511	0.05576	Ppig
-0.9931	4.623	0.05582	Eif3g
-0.9708	6.032	0.05598	mt-Nd1
0.6748	7.118	0.05633	Gls
1.25	5.785	0.0566	Rab20
0.8737	5.955	0.05676	Lpar6
4.989	4.687	0.05676	Cd300lf
0.8076	6.36	0.05676	Evi2a
0.8563	6.017	0.057	Grk3
0.4445	8.192	0.05763	Gtdc1
-0.587	8.543	0.05763	Trf
0.9893	5.465	0.05893	Mtmr10
-0.8091	5.53	0.05895	Stard3nl
-7.389	3.325	0.05945	F13a1
1.273	5.573	0.05995	Casp4
-0.8007	5.347	0.06026	Rest
0.8723	8.191	0.06075	Arhgap24
-1.135	5.542	0.06075	Rps15
0.4928	9.404	0.06088	Fhit
0.5217	7.422	0.06114	Rassf3
0.5521	6.866	0.06114	Zfp609
-0.6792	6.083	0.06139	Cysltr1
-0.767	6.028	0.06163	Rps12
0.7675	5.928	0.06163	Nova1
-0.4352	7.771	0.06163	Atp2c1
-0.8202	5.277	0.06163	mt-Nd4
0.8003	5.465	0.06163	Myadm
1.881	7.19	0.06163	Atf3
0.6483	7.743	0.06204	Irak2
-0.9229	4.747	0.06205	Gpalpp1
0.8592	5.75	0.06237	Uhrf1bp1
[truncated: 56,592 more rows]

## Sheet: DE-8_Oligodendrocyte
logFC	AveExpr	p_val_adj	gene_names
[truncated: 57,010 more rows]

[truncated: 18 more sheets: DE-9_Oligodendrocyte, DE-10_Pericyte, DE-11_Astrocyte, DE-12_Endothelia, DE-13_Ependymal_cell, DE-14_Ependymal_cell, DE-15_Choroid_plexus, DE-16_Immune, DE-17_Endothelia, DE-18_Endothelia, DE-19_Endothelia, DE-20_Oligodendrocytes, DE-21_OPCs, DE-22_Choroid_plexus, DE-23_Unknown, DE-24_Microglia, DE-25_Astrocyte, DE-26_Immature_neuron]
