# Supplementary material for: P2RX7 regulates tauopathy progression via tau and mitochondria loading in extracellular vesicles
Source: Research Square preprint supplement (doi:10.21203/rs.3.rs-6771517/v1), 2025-06-23
Supplement: Supplementary file 1 [file 49c11177e92c3083e64308af.pdf]

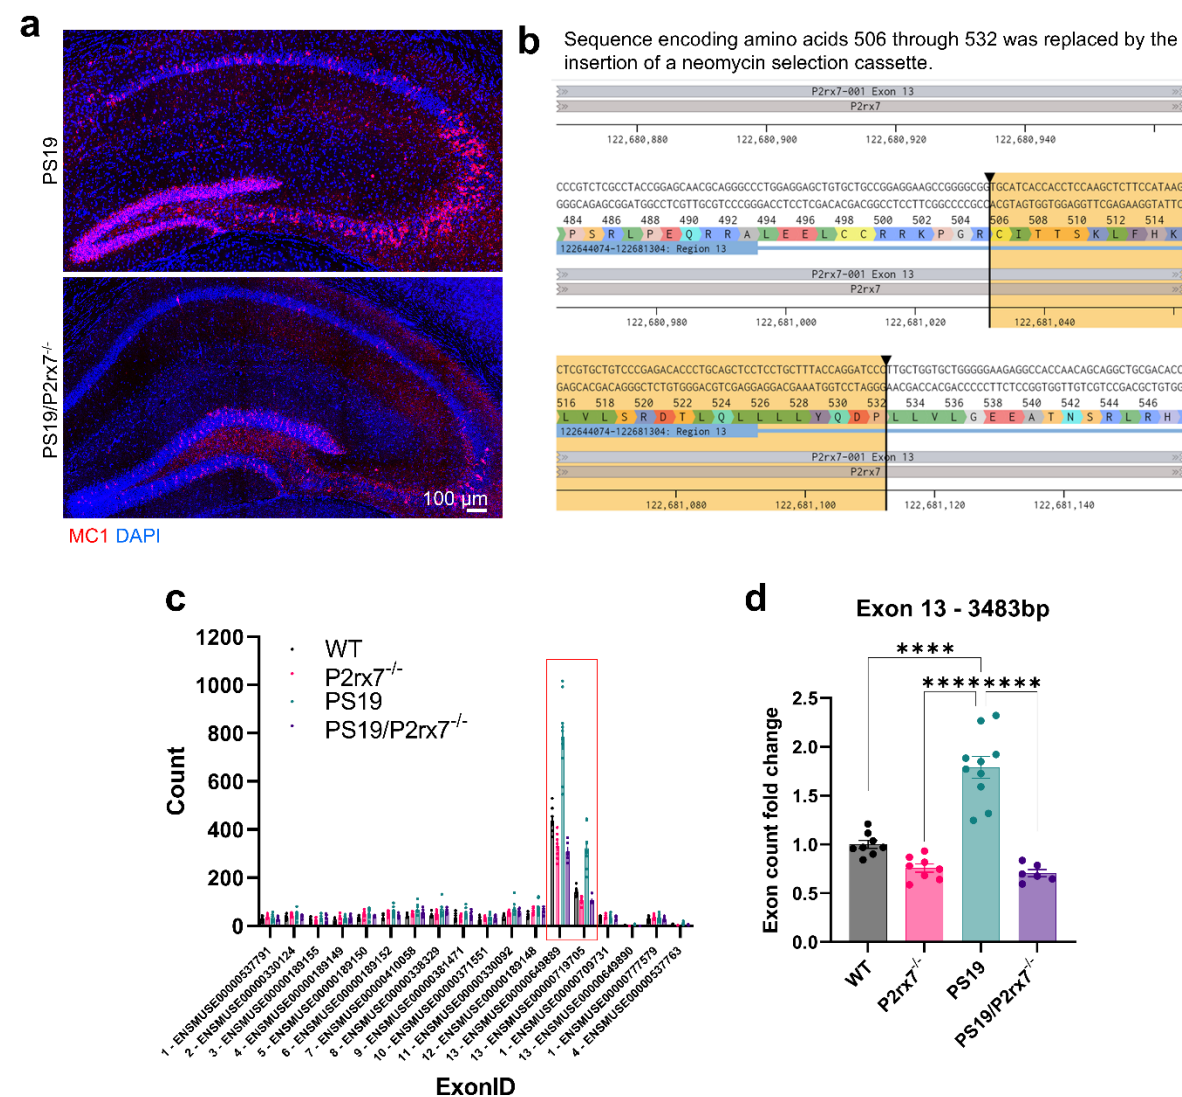

**Extended Data Fig. 1: *P2rx7* deficiency regulation of misfolded tau accumulation and *P2rx7* transcripts in hippocampus of 9.5-month-old PS19 mice.** **a**, Representative confocal images of misfolded tau (MC1 antibody) staining in hippocampus from PS19 and PS19/*P2rx7*<sup>-/-</sup> mice. **b**, Sequence encoding amino acids 506 through 532 was replaced by the insertion of a neomycin selection cassette in *P2rx7*<sup>-/-</sup> mice created by Pfizer. **c**, *P2rx7* exon transcripts count in hippocampus from 9.5-month-old mice ( $n=8$

WT mice,  $n=8$  P2rx7<sup>-/-</sup> mice,  $n=10$  PS19 mice,  $n=6$  PS19/P2rx7<sup>-/-</sup>). **d**, Expression levels of *P2rx7* exon 13 transcripts ( $n=8$  WT mice,  $n=8$  P2rx7<sup>-/-</sup> mice,  $n=10$  PS19 mice,  $n=6$  PS19/P2rx7<sup>-/-</sup> mice). All the bar graphs are represented by mean  $\pm$  SEM; \*\*\*\* $P < 0.0001$  by one-way ANOVA with Holm–Šidák post hoc analysis.



**Extended Data Fig. 2: Bulk RNA-seq of PS19 mouse hippocampus. a-b,** Gene set enrichment analysis (GSEA) of top pathways regulated in bulk RNA-seq of hippocampus from PS19 versus WT (a) and PS19/P2rx7<sup>-/-</sup> versus PS19 (b) mice (*n*= 10 PS19 mice, *n*= 6 PS19/P2rx7<sup>-/-</sup> mice). **c,** Heatmap comparing the gene expression levels from module MEblue among the groups. PS19 and PS19/P2rx7<sup>-/-</sup> mice groups are highlighted with dashed lines (*n*= 8 WT mice, *n*= 8 P2rx7<sup>-/-</sup> mice, *n*= 10 PS19 mice and *n*= 6 PS19/P2rx7<sup>-/-</sup> mice). **d,** Heatmap displaying the expression level of genes associated with extracellular vesicles/extracellular exosome and exosome biogenesis gene ontology (GO) pathways (*n*= 8 WT mice, *n*= 8 P2rx7<sup>-/-</sup> mice, *n*= 10 PS19 mice, *n*= 6 PS19/P2rx7<sup>-/-</sup> mice).

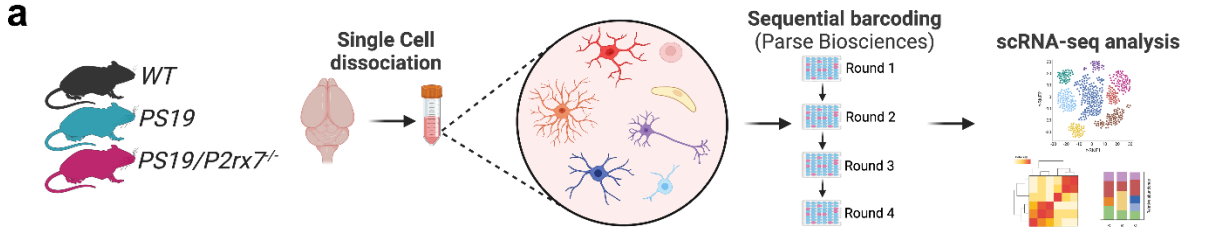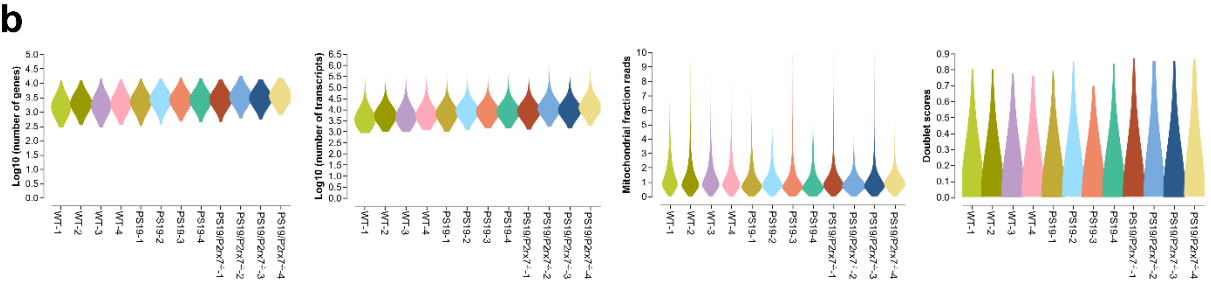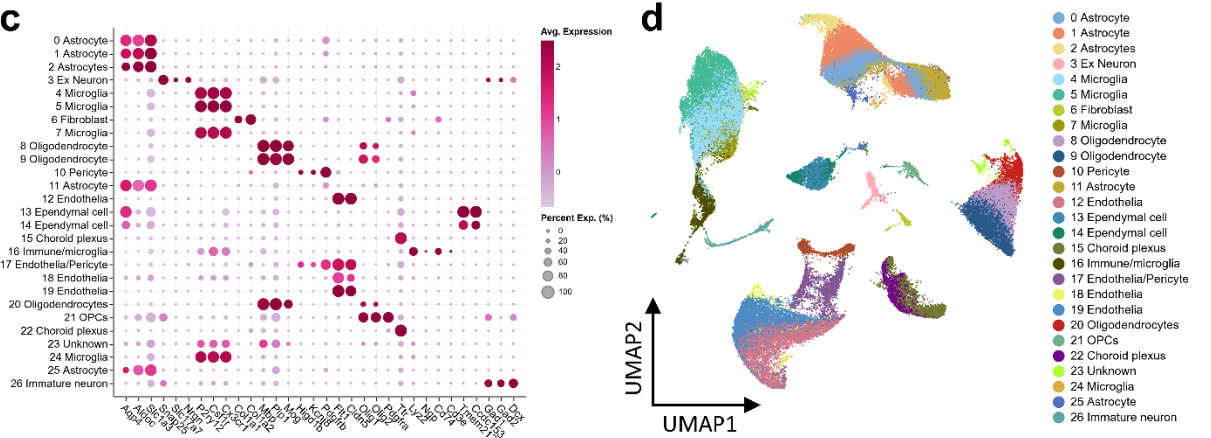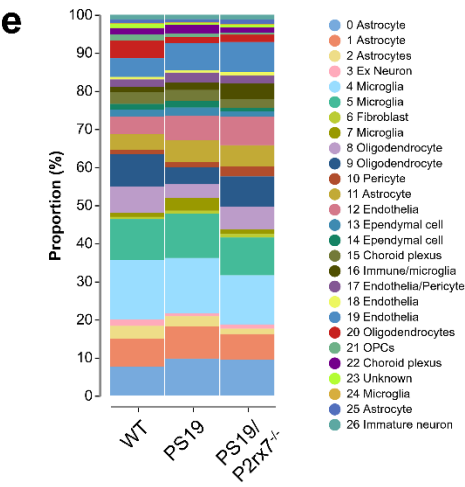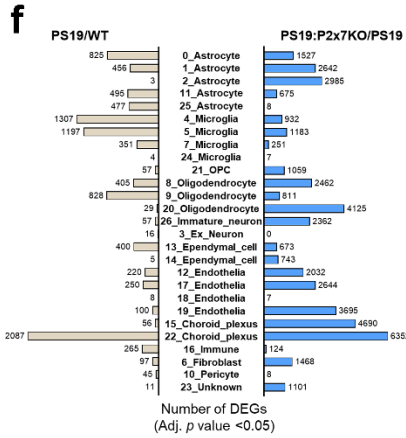

**Extended Data Fig. 3: scRNA-seq of PS19 mouse brain cells.** **a**, Schematic design for scRNA-seq analysis of hippocampus from 9.5-month-old mice ( $n= 4$  mice per group). **b**, Quality control measures in scRNA-seq analysis of mouse brain cells showing the number of genes, transcripts, mitochondrial fraction reads and doublets scores per each sample ( $n= 4$  mice per group). **c**, Dot-plot depicting normalized average expression of selected genes used for cell identity annotation for each of 27 identified cell clusters. **d**, UMAP representation of 27 clusters identified in scRNA-seq analysis of 89,795 cells from brain cortex from WT, PS19 and PS19/P2rx7<sup>-/-</sup> mice. **e**, Stacked barplot showing the cell cluster compositions from WT, PS19 and PS19/P2rx7<sup>-/-</sup> mouse brains. Cluster annotation indicated by colors shown in c. **f**, Number of differentially expressed genes per cell cluster in PS19 versus WT and PS19/P2rx7<sup>-/-</sup> versus PS19 mice ( $n= 4$  per group,  $P < 0.05$ ).

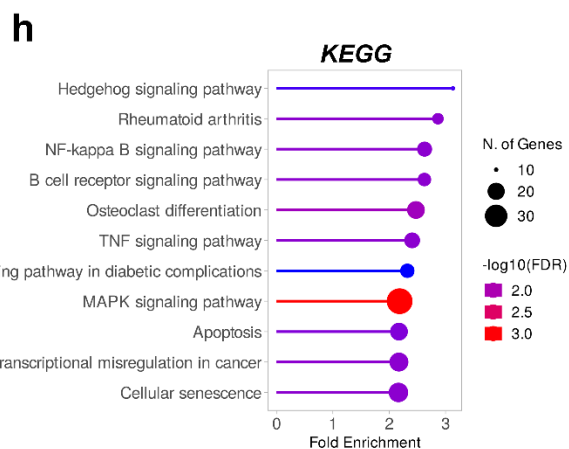

**Extended Data Fig. 4: scRNA-seq reveals distinct effects of *P2rx7* deficiency on glial populations in PS19 mouse brain.** **a**, UMAP representation of scRNA-seq analysis of 89,795 cells from brain cortex from WT, PS19 and PS19/*P2rx7*<sup>-/-</sup> mice grouped by major cell type. **b**, Stacked bar plot showing the cell-type compositions from WT, PS19 and PS19/*P2rx7*<sup>-/-</sup> mouse brains. **c**, Dot-plot showing normalized average expression levels of *P2rx7* gene in different cell types. **d**, Volcano plot showing differentially expressed genes in all microglia cells from PS19 versus WT mice ( $n = 4$  mice per group,  $P < 0.05$ ). **e**, Top enriched GO annotations of differentially expressed genes upregulated in microglia from PS19 vs WT mice ( $n = 4$  mice per group,  $P < 0.05$ ). **f**, Venn diagram showing differentially expressed genes regulated by *P2rx7* deletion in PS19 mice overlapped among glial cells ( $P < 0.05$  and  $\log_2FC > \pm 0.25$ ). **g**, Top enriched GO biological process (BP) annotations of 242 differentially expressed genes commonly regulated by *P2rx7* deletion in glial cells from PS19 mice. **h**, String gene network of commonly regulated genes by *P2rx7* deletion in glial cells from PS19 mice filtered by interaction confidence.

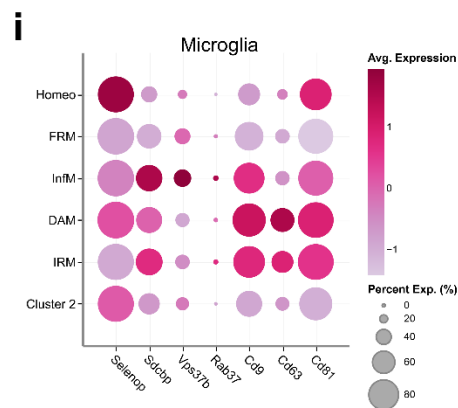

**Extended Data Fig. 5: Sub clustering of microglia and immune cells in scRNA-seq.**

**a**, UMAP plots representation of 26,801 microglia and immune cells distributed in 18 subclusters ( $n=4$  mice per group). **b**, Stacked barplot showing the compositions of microglia and immune cells subcluster in WT, PS19 and PS19/P2rx7<sup>-/-</sup>. **c**, Dot-plot depicting normalized average expression of selected genes used for cell identity annotation and filtering immune cells clusters. **d**, Dot-plot showing normalized average expression of selected genes used for microglia state annotation in filtered microglia cell population. **e**, Top enriched GO annotations of differentially expressed genes enriched in microglia FRM in comparison with all other microglia clusters. **f**, Volcano plot showing DEGs regulated in InfM cluster from PS19/P2rx7<sup>-/-</sup> mice. **g**, Ingenuity pathway analysis (IPA) of biological process annotations downregulated in FRM cluster from PS19/P2rx7<sup>-/-</sup> mice. **h**, Gene interaction network and master regulators in FRM cluster from PS19/P2rx7<sup>-/-</sup> mice predicted by IPA. **i**, Dot-plot showing normalized average expression of selected genes associated with EV secretion in different microglia states from scRNA-seq data.

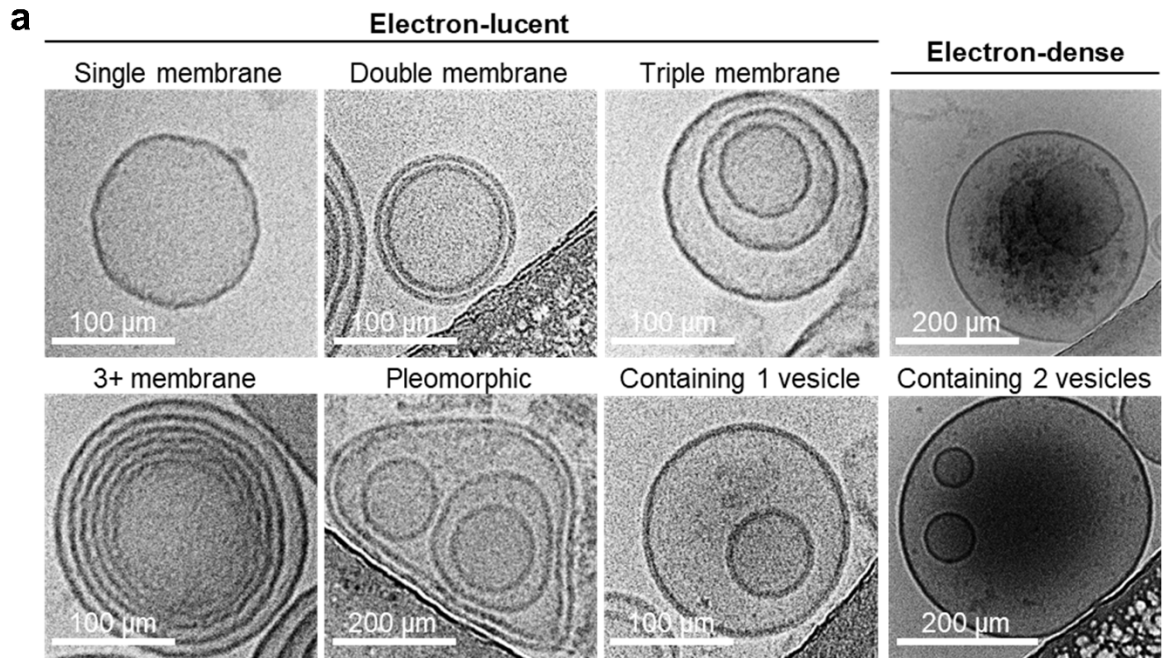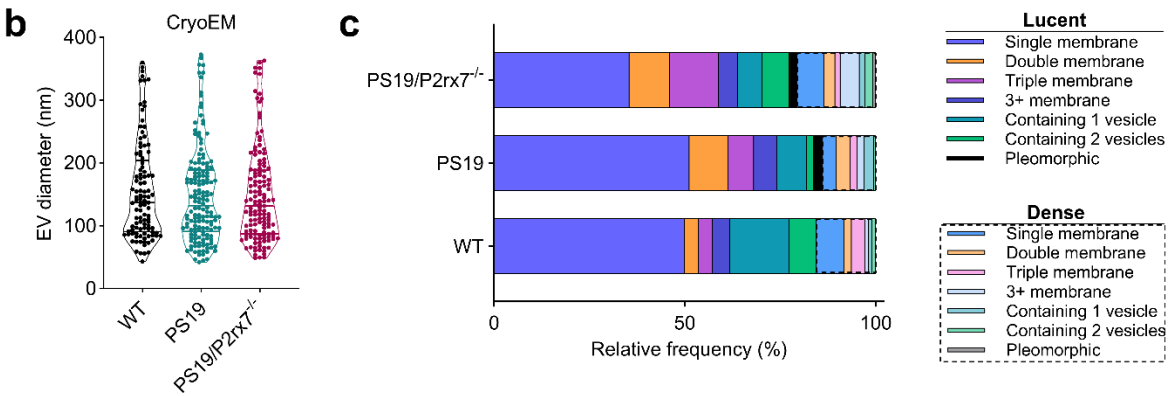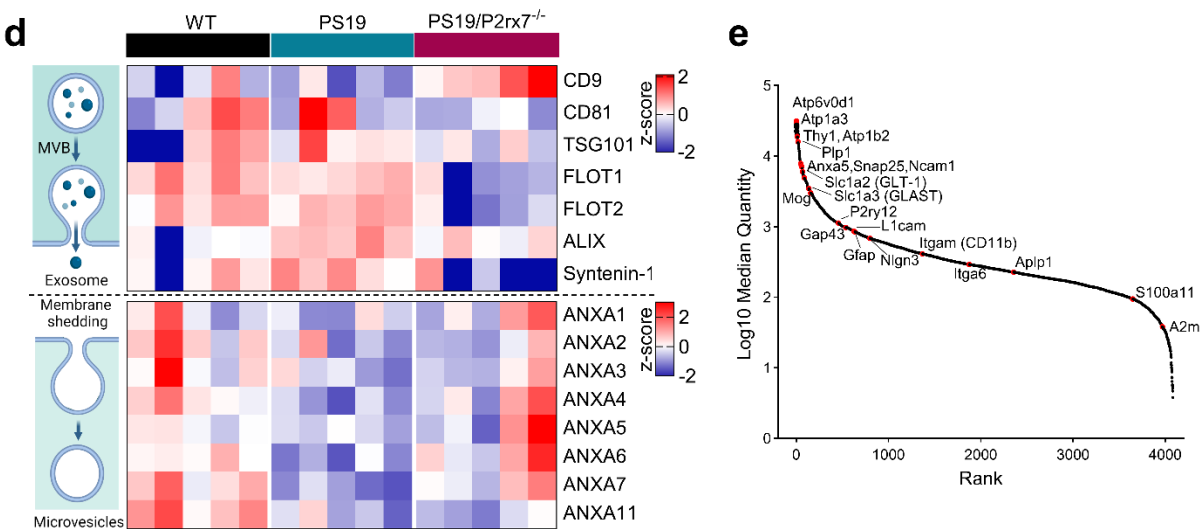

**Extended Data Fig. 6: DIA mass spectrometry and cryo-EM analysis of mouse BDEVs.** **a-c**, Cryo-EM analysis of size (**a,b**), morphology and electron density (**a,c**) of BDEVs isolated from 9.5-month-old mouse brain ( $n= 3$  mice per group; total BDEVs analyzed  $n= 105$  WT, 156 PS19 and 135 PS19/P2rx7<sup>-/-</sup>). **d**, Heatmap showing the expression level of exosome and microvesicles proteins in BDEVs ( $n= 5$  mice per group). **e**, Protein rank displaying selected cell-type specific proteins found in BDEVs ( $n= 5$  mice per group).

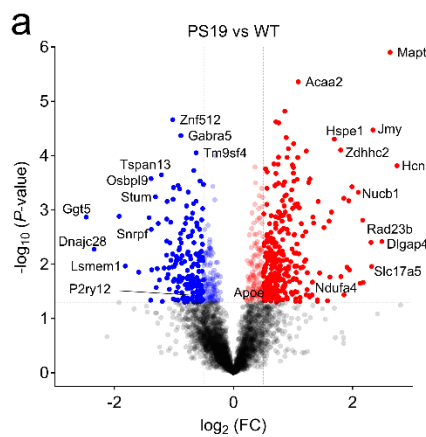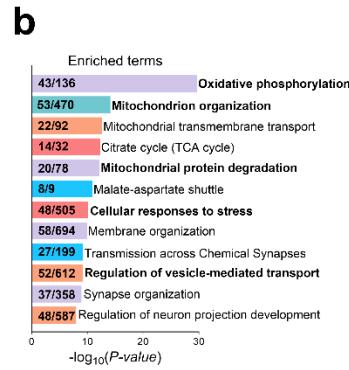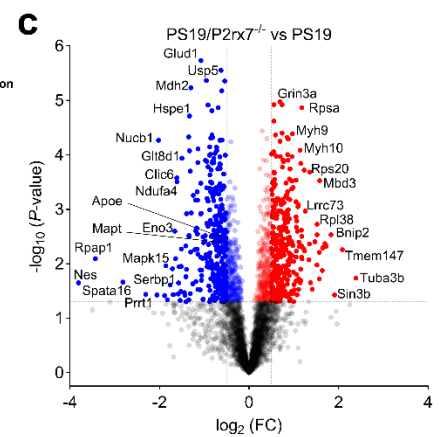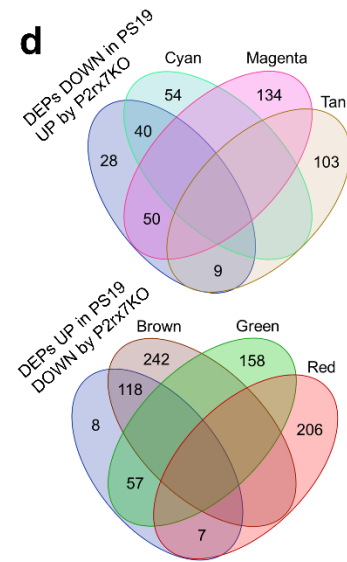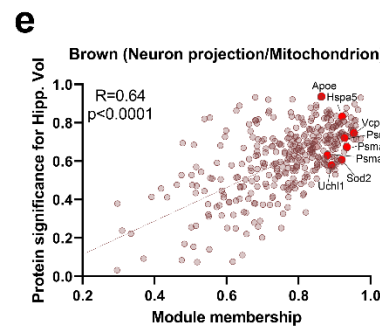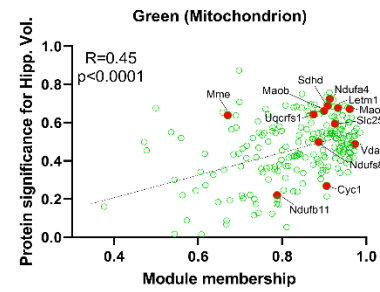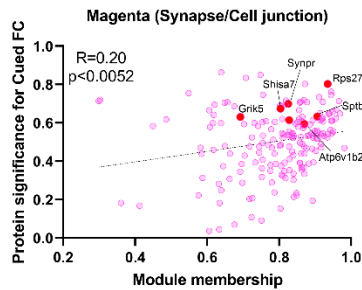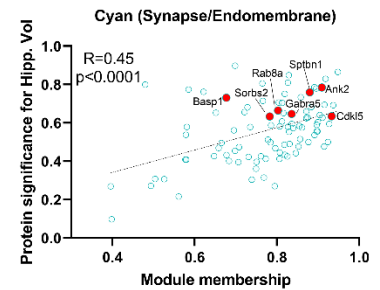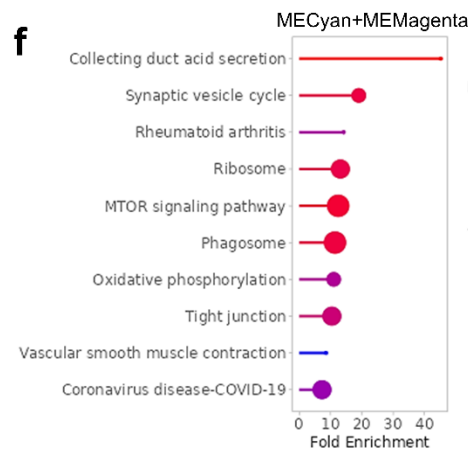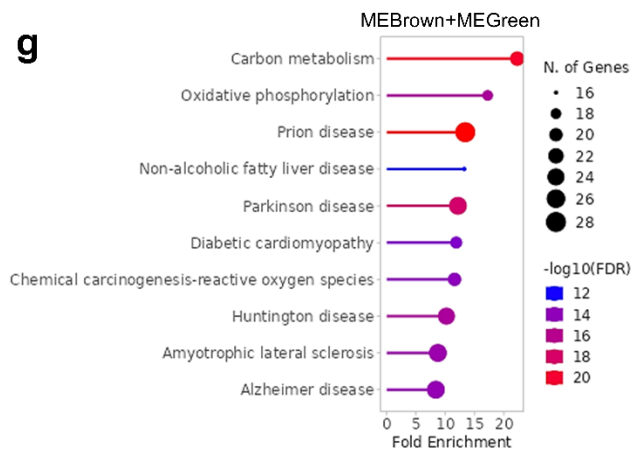

**Extended Data Fig. 7: Brain-EV proteomics and co-expression network analysis shows the key molecular signature associated with disease amelioration in *P2rx7*-deficient PS19 mice.** **a**, Volcano plot of DIA mass spectrometry showing differentially expressed protein (DEPs) in BDEVs from PS19 versus WT mice ( $n=5$  mice per group,  $P < 0.05$ ). **b**, Enriched pathway terms of DEPs upregulated in PS19 versus WT mice comparison. **c**, Volcano plot showing DEPs in BDEVs from PS19/*P2rx7*<sup>-/-</sup> versus PS19 mice ( $n=5$  mice per group,  $P < 0.05$ ). **d**, Venn diagram showing the protein modules overlap with DEPs regulated in PS19 mice by *P2rx7*KO. **e**, Correlation analysis of protein significance and modular enrichment with disease phenotype. Main proteins regulated by *P2rx7* deficiency were highlighted in red. **f,g**, GO-KEGG analysis of the main overlapped modules from **d**.

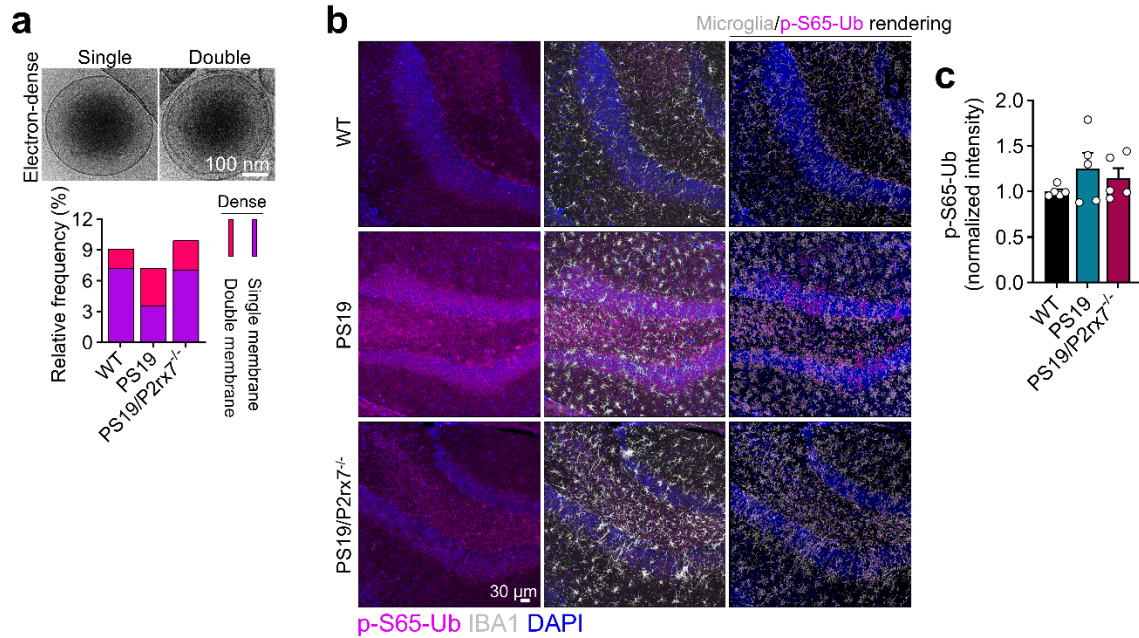

**Extended Data Fig. 8: *P2rx7* deficiency effects on mitochondrial-derived electron-dense vesicles and mitophagy in PS19 mice.** **a**, Cryo-EM analysis of percentage of single and double membrane electron-dense vesicles from total BDEVs population ( $n=3$  mice per group; total BDEVs analyzed  $n= 110$  WT,  $n= 166$  PS19 and  $n= 141$  PS19/P2rx7<sup>-/-</sup>). **b**, Representative confocal images and 3D rendering of microglial IBA1 and p-S65-Ub staining in DG hippocampus area. **c**, Total p-S65-Ub intensity measures using Imaris ( $n= 5$  WT mice,  $n= 5$  PS19 mice,  $n= 5$  PS19/P2rx7<sup>-/-</sup> mice; one-way ANOVA with Holm–Šidák post hoc analysis). All the bar graphs are represented by mean  $\pm$  SEM; \*\* $P < 0.01$ .

## **Supplementary information**

**Supplementary Fig. 1.** Uncropped images for immunoblots associated with Fig. 7 c.

**Supplementary Fig. 2.** Figure exemplifying the gating strategy for mouse microglia fluorescence-activated cell sorting.

**Supplementary Table 1.** Hippocampus bulk RNA-seq.

**Supplementary Table 2.** scRNA-seq of brain cell clusters PS19 vs WT mice.

**Supplementary Table 3.** scRNA-seq of brain cell clusters PS19\_P2rx7KO vs PS19 mice.

**Supplementary Table 4.** scRNA-seq of glial cells common DEGs PS19\_P2rx7KO vs PS19 mice.

**Supplementary Table 5.** scRNA-seq of microglia PS19 vs WT mice.

**Supplementary Table 6.** scRNA-seq of microglia subclusters (main genes) vs all other clusters.

**Supplementary Table 7.** scRNA-seq of microglia subclusters PS19\_P2rx7KO vs PS19 mice.

**Supplementary Table 8.** Brain-EV proteomics.

**Supplementary Table 9.** RNA-seq of sorted microglia from EV-injected mice.
