# Supplementary material for: P2RX7 regulates tauopathy progression via tau and mitochondria loading in extracellular vesicles
Source: Research Square preprint supplement (doi:10.21203/rs.3.rs-6771517/v1), 2025-06-23
Supplement: Supplementary file 2 [file 51d571cce6bd7c8863515435.xlsx]

## Sheet: Glia_common DEGs
scRNA-seq. Commom DEGs in glial cells from PS19/P2rx7KO vs PS19 mice, related to Extended Data Fig. 4f-h
	Astrocyte			Microglia			Oligodendrocyte
gene_names	logFC	AveExpr	p_val_adj	logFC	AveExpr	p_val_adj	logFC	AveExpr	p_val_adj
1110019D14Rik	0.2605	6.611	0.03768	0.5444	5.62	0.01425	0.4888	4.524	0.00778
4833420G17Rik	1.709	4.83	0.0003557	0.6954	5.591	0.001772	0.9936	4.526	0.0004824
4930405A10Rik	1.021	0.6442	0.04088	1.243	2.286	0.01874	1.26	0.1833	0.009477
4930481A15Rik	4.073	1.58	0.03271	4.501	2.639	0.01203	3.919	0.7011	0.00843
4930519F16Rik	-5.269	1.196	0.005288	-5.568	1.572	0.008365	-2.184	-0.1221	0.001861
6430590A07Rik	1.791	3.091	0.007668	1.019	1.652	0.01994	2.284	2.247	0.007696
9330185C12Rik	-1.5	1.964	0.007755	-1.665	3.009	0.01899	-1.256	2.378	0.005151
9430091E24Rik	-0.2899	4.188	0.03807	0.5216	3.44	0.01387	0.4283	3.325	0.04558
Abcg3	2.855	-0.4283	0.02513	1.674	4.202	0.01166	3.87	-0.6932	0.004539
Acaa1a	0.6892	4.021	0.02697	0.6304	3.831	0.01508	0.6598	4.534	0.009181
Actr3-ps	-4.223	-1.005	0.02766	-6.179	0.9143	0.0047	-5.238	0.8448	0.002585
Adamts1	-0.9191	4.012	0.009242	-2.47	2.939	0.03302	-0.4584	5.897	0.04779
Adgrg1	-0.5973	7.478	0.01581	-0.3477	7.79	0.03611	1.673	3.947	0.003124
Aff1	0.4832	7.53	0.03347	0.2976	7.478	0.0449	0.3343	6.013	0.01627
Aldoc	-0.8093	9.307	0.03406	0.9904	2.632	0.0109	-1.14	4.259	0.01524
Arid4a	0.2366	6.77	0.02789	0.3363	7.73	0.04263	0.2895	6.33	0.02085
Arl1	-0.3661	4.055	0.03406	-0.417	5.126	0.01211	-0.4631	4.741	0.00573
Arl6ip1	-0.5293	6.645	0.02177	-0.4462	7.165	0.0213	-0.4915	7.272	0.008943
Atp1a2	-0.4241	11.82	0.03009	0.9333	4.765	0.00457	-0.6029	5.365	0.008817
Atp1b2	-0.5363	9.951	0.0448	1.102	2.856	0.004127	-0.6385	3.832	0.0115
Atp6v1f	-0.633	2.898	0.02889	-0.6852	4.188	0.02261	-0.7324	4.503	0.01335
Atp8a2	2.833	4.752	0.009662	7.27	6.369	1.511e-09	3.571	4.835	0.0005698
Banp	0.7353	5.638	0.02138	0.5655	6.478	0.00941	0.9394	5.147	0.002496
BC031181	-0.5074	3.666	0.02446	-0.682	3.988	0.01406	-0.6992	5.135	0.002017
Bmyc	-0.8553	3.16	0.01053	-0.7023	3.507	0.01749	-0.5419	3.718	0.01064
Brd7	0.2212	5.612	0.04329	0.2753	6.24	0.02462	-0.2585	6.023	0.02504
Brd9	0.4128	4.707	0.01261	0.3731	4.801	0.01474	0.2922	4.673	0.0466
Brinp2	-0.6268	6.191	0.01518	-4.517	0.6262	0.02039	-2.611	1.483	0.0009474
Btaf1	0.7404	6.475	0.0003557	0.467	7.235	0.003304	0.5264	6.512	0.002585
Bzw2	-0.2732	5.107	0.04083	-1.06	5.062	0.0007738	-0.7754	4.869	0.004675
C130046K22Rik	4.958	-0.5274	0.003933	2.501	1.085	0.008721	5.045	-0.9541	0.0002585
Cadm4	-0.4288	6.642	0.01518	0.6274	1.226	0.04462	-0.4747	7.702	0.003553
Calm1	-0.6387	7.081	0.00621	-0.5298	7.248	0.04734	-0.6058	8.481	0.002496
Cast	2.007	2.207	0.004362	0.8796	4.896	0.003195	2.849	1.37	0.005776
Ccdc192	3.516	1.074	0.01532	1.973	4.764	0.001418	1.702	1.776	0.01251
Ccdc28b	0.7079	3.903	0.005963	0.8663	3.275	0.007715	0.4908	3.325	0.0356
Cd302	-0.3821	4.574	0.02583	-0.4862	5.079	0.01625	1.862	0.5718	0.03165
Cd36	-3.565	0.06559	0.01518	-5.62	1.905	0.0001224	-2.8	0.9157	0.008292
Cep112	0.8448	5.577	0.009292	1.12	5.568	0.01747	1.475	4.253	0.007493
Cep120	0.5275	5.458	0.004362	0.2877	5.949	0.01863	-0.2054	6.458	0.02914
Cfap77	-3.497	1.163	0.009242	-1.559	0.821	0.01874	-2.636	0.968	0.02449
Chm	0.2342	5.899	0.03064	0.2769	5.999	0.02899	0.3556	6.142	0.006912
Chmp1b	-0.3932	3.504	0.0283	-0.3976	5.03	0.0449	-0.6494	5.496	0.0005777
Clasrp	0.3477	5.162	0.04171	0.3339	5.085	0.04714	0.4177	6.324	0.01856
Cldn34c1	5.574	0.8688	0.0002055	6.025	-1.292	6.631e-05	5.867	1.844	2.849e-05
Cldnd1	-0.5496	4.662	0.01174	-0.5068	5.145	0.01033	-0.429	6.785	0.007256
Cop1	0.388	6.694	0.01298	0.3394	7.164	0.03601	0.4092	6.759	0.003436
Cst3	-0.7553	9.565	0.02656	-0.8483	11.69	0.008503	1.815	7.094	0.007355
Ctbp1	-0.2763	4.679	0.02754	-0.3598	5.511	0.03393	-0.3686	6.415	0.01092
Cwc15	-0.4074	4.589	0.01283	-0.4025	5.065	0.02788	-0.6534	6.145	0.002496
Cyc1	-0.7165	4.341	0.00619	-0.5742	3.635	0.02319	-0.7002	4.227	0.003711
Cycs	-0.6901	3.414	0.01646	-0.8375	2.99	0.01037	-0.5203	3.346	0.02085
D2hgdh	0.6561	3.338	0.02025	0.7016	3.769	0.03043	0.5077	2.91	0.04423
Dcaf6	0.2404	6.84	0.03604	0.2918	5.823	0.03726	0.2789	6.573	0.04491
Dgka	0.3019	4.354	0.03768	0.4367	4.339	0.02456	1.154	1.912	0.003618
Dhx57	0.2115	5.654	0.04389	0.3215	6.013	0.01524	0.2837	4.97	0.02314
Dhx9	0.3134	5.859	0.01969	0.3667	7.283	0.02585	-0.2683	6.799	0.02408
Dnajb9	-0.4736	5.233	0.02704	-0.4927	5.114	0.03244	-0.4102	4.696	0.02762
Dusp12	1.046	3.468	0.003933	0.9658	4.335	0.002572	0.7508	3.438	0.009524
Ebpl	-0.6353	3.555	0.01439	-0.5565	3.095	0.02518	-0.7584	3.693	0.005164
Eif1b	-0.49	3.764	0.0364	-0.4325	3.939	0.0381	-0.5191	4.376	0.006678
Eif4g2	-0.3051	7.409	0.03008	-0.3747	8.385	0.03175	-0.482	8.817	0.002583
Emc3	-0.5687	5.672	0.01646	-0.3042	5.262	0.03921	-0.3125	5.274	0.04609
Enpp5	-0.5861	5.299	0.01801	2.363	0.771	0.01838	-0.5909	6.827	0.002963
ENSMUSG00000120201	-2.073	-0.3953	0.02854	-3.539	-0.7736	0.03364	-2.8	0.00129	0.03637
ENSMUSG00000121318	4.276	1.646	0.01287	5.186	2.152	0.005718	5.392	1.212	0.007264
Esco1	0.2458	6.547	0.03968	0.3342	5.987	0.04926	0.373	5.28	0.01134
F11r	2.257	2.645	0.03453	1.024	7.449	0.006744	3.811	2.418	0.02437
Fam193a	0.3117	7.795	0.01532	0.2762	7.797	0.03208	0.36	7.201	0.007291
Fkrp	-0.4906	2.449	0.01802	-0.5166	3.496	0.0134	-0.5889	3.032	0.007773
Gabarapl1	-0.5489	4.784	0.0225	-0.3153	3.924	0.0426	-0.588	6.224	0.002458
Galk2	0.4502	4.722	0.03959	0.3591	6.35	0.01847	0.5634	4.211	0.01519
Get3	-0.666	3.54	0.0238	-0.6723	3.876	0.01956	-0.5314	4.072	0.007321
Glul	-0.522	10.37	0.0411	-0.4316	8.859	0.04041	-0.6738	10.95	0.004241
Gm10125	0.7609	5.919	0.02602	1.456	3.041	0.01252	1.428	0.2595	0.03959
Gm14584	-4.188	-0.9368	0.004862	-4.155	0.283	0.003154	-3.618	0.4726	0.01652
Gm15564	-1.034	8.24	0.01745	-0.9196	9.197	0.04245	-1.123	8.866	0.002578
Gm21988	-0.6616	3.235	0.03073	-0.6279	4.659	0.01531	-0.811	5.402	0.002624
Gm26782	0.8052	3.458	0.005119	1.495	3.299	0.002263	1.385	2.337	0.01281
Gm31508	0.9622	2.586	0.02208	0.9375	1.479	0.04657	1.816	1.199	0.01442
Gm3375	-4.14	-1.823	0.01402	-3.418	-1.657	0.009202	-2.849	-0.6443	0.009316
Gm40466	0.7491	3.104	0.02265	0.7324	3.437	0.01838	0.9433	2.331	0.004788
Gm46440	0.7708	2.221	0.03315	1.139	0.02246	0.01889	0.9064	1.364	0.02796
Gm47283	-4.162	3.559	0.009551	-4.895	4.252	0.004492	-4.686	3.703	0.003408
Gm47754	2.764	-0.7846	0.02518	0.9	4.032	0.003085	3.915	-1.242	0.001062
Gm49064	-0.9296	1.141	0.02369	-1.626	-0.3381	0.03768	-0.927	0.7597	0.01647
Gm7240	1.139	2.605	0.005968	0.3956	4.836	0.03453	2.602	1.076	0.001912
Gnai2	-0.3699	6.81	0.03261	-0.4173	8.349	0.007771	-0.3037	7.591	0.02348
Gnas	-0.2531	7.355	0.04747	-0.5344	8.243	0.04462	-0.5471	7.474	0.004616
Gnb2	-0.4256	4.609	0.04962	-0.4691	5.803	0.03143	-0.4621	5.685	0.03096
Gon4l	0.2349	5.402	0.04117	0.2409	5.764	0.04215	0.3188	4.917	0.04567
Gpr160	1.972	0.5858	0.04674	0.4831	5.363	0.0422	2.171	1.158	0.04123
Gpr37l1	-0.7548	8.856	0.01706	0.9485	1.544	0.02911	-0.871	2.122	0.02492
Gpx4	-0.4381	3.995	0.03072	-0.519	3.989	0.0304	-0.6313	5.92	0.0209
Grcc10	-0.4472	2.752	0.0286	-0.6278	3.742	0.006877	-0.5994	3.32	0.04288
H2az1	-0.6359	2.132	0.04522	-0.8305	3.99	0.01211	-0.6901	3.308	0.01015
Hexim1	-0.4361	3.887	0.03171	-0.6141	4.049	0.003085	-0.3618	3.867	0.0421
Higd2a	-0.6275	2.563	0.01763	-0.5313	3.49	0.01422	-0.6294	3.555	0.01566
Hnrnph2	-0.3368	4.18	0.03218	-0.564	5.056	0.008418	-0.4825	5.514	0.005288
Hspa2	-0.7653	4.473	0.01439	-1.047	0.8573	0.04461	-0.7923	3.832	0.007395
Hspa8	-0.6086	6.937	0.009937	-0.8481	7.794	0.004975	-0.8334	8.766	0.0008366
Ide	0.6103	6.784	0.00621	0.8341	5.901	0.001702	0.3348	6.212	0.01404
Igsf8	-0.5072	8.183	0.02121	-0.9909	5.58	0.008893	-0.3245	5.935	0.04661
Inf2	0.3445	4.893	0.02645	1.292	0.319	0.03976	-0.6084	7.717	0.0004824
Iqsec2	0.5694	6.471	0.02592	0.9431	7.012	0.001179	0.9864	4.474	0.001394
Irf2bp1	-0.6564	2.981	0.01061	-0.5667	3.81	0.0422	-0.8593	3.894	0.001363
Irf2bp2	-0.2716	4.312	0.02951	-0.2917	5.958	0.02928	-0.3253	5.754	0.00652
Jun	-0.5473	4.633	0.009292	-1.809	6.729	0.01075	-0.8618	6.615	0.0004658
Kansl1l	0.4422	7.607	0.01838	0.4969	7.308	0.004396	0.3473	6.869	0.01255
Kctd12	1.42	5.566	0.01225	-0.2893	9.313	0.03456	3.704	3.986	0.003124
Kdelr1	-0.5596	4.947	0.01141	-0.3358	4.805	0.04897	-0.4377	4.421	0.01231
Lars2	-1.117	11.98	0.009205	-0.9863	12.91	0.01428	-1.138	12.6	0.0007196
Lfng	-0.361	6.915	0.04554	-0.8512	4.947	0.001702	1.098	0.8121	0.03628
Lims1	0.2898	7.513	0.03836	-0.4544	8.812	0.01422	0.3372	7.043	0.01381
Lrch3	0.3551	7.419	0.01004	0.2681	7.433	0.04351	0.3001	7.41	0.006678
Lrmda	1.164	9.37	0.009937	1.364	11.31	0.03046	0.9752	9.031	0.002644
M6pr	-0.3526	5.108	0.02778	-0.3936	6.621	0.01874	-0.3699	6.288	0.003428
Mageh1	-0.6814	4.264	0.03634	-1.057	1.277	0.02497	-0.8406	2.943	0.001924
Manf	-0.5384	4.544	0.01402	-0.685	5.323	0.01561	-0.6846	4.721	0.001855
Map10	-0.7279	1.901	0.01623	-0.8746	1.612	0.04071	-1.077	2.529	0.003582
Map1lc3b	-0.4204	4.81	0.02874	-0.3104	5.086	0.03334	-0.5404	6.22	0.001344
Mbtd1	0.3136	6.797	0.0169	0.5798	6.965	0.002565	0.3663	6.389	0.02069
Mfap3l	-0.464	7.98	0.03145	0.7086	2.909	0.009843	-0.6712	3.479	0.0093
Mid1ip1	-0.461	6.29	0.02075	-0.6656	5.304	0.002377	-0.5998	7.199	0.002763
Mlf2	-0.4825	5.174	0.02301	-0.5652	5.066	0.00663	-0.4999	6.237	0.002877
Mon1a	0.5196	3.738	0.009937	0.9139	3.789	0.0007361	0.5623	3.649	0.0119
Mpp7	1.55	3.739	0.01225	4.918	2.431	0.000478	3.709	2.233	0.001924
Mrc2	2.081	2.013	0.04999	1.808	5.753	0.01052	3.289	1.638	0.02339
Mri1	0.8726	2.858	0.03271	0.975	2.78	0.02362	0.6195	1.847	0.02671
Mtfr1l	-0.3311	4.105	0.04788	-0.3254	4.755	0.03059	-0.3825	4.422	0.01563
Nckipsd	0.3262	3.615	0.0399	0.3652	4.273	0.04714	0.465	2.702	0.02908
Ndufa4	-0.6335	4.542	0.009937	-0.6908	3.737	0.03384	-0.7151	4.756	0.007478
Ndufb11	-0.7391	3.004	0.02119	-0.5467	2.609	0.0338	-0.8279	4.053	0.002676
Ndufs8	-0.7279	3.253	0.03266	-0.5003	3.578	0.04652	-0.553	3.952	0.01933
Nme7	-1.137	6.723	0.004862	-3.138	6	6.944e-05	-3.183	5.115	0.0002285
Nnt - ENSMUSG00000025453	0.2822	5.984	0.01754	0.2606	6.377	0.03726	1.054	4.547	0.001569
Nudt6	0.8601	2.846	0.01061	1.109	3.422	0.006949	1.2	2.589	0.004641
Nxt2	-0.3298	3.714	0.02816	-0.5744	4.873	0.0094	-0.3889	5.567	0.006097
Oat	-0.6685	4.949	0.01735	-0.545	3.377	0.04897	-0.7789	3.832	0.008442
P4hb	-0.4447	5.703	0.02417	-0.5182	6.684	0.04668	-0.3323	6.286	0.02128
Pals2	0.3315	8.44	0.03768	-0.3501	6.785	0.03892	1.181	3.123	0.007919
Pcbp1	-0.4502	4.907	0.02754	-0.448	6.005	0.03936	-0.4725	6.184	0.004717
Pcna-ps2	-1.928	-1.565	0.01361	-4.455	-0.9059	0.000442	-4.631	0.1042	0.0004198
Pcyox1l	-0.605	2.846	0.02487	-0.697	2.54	0.0182	-0.4346	2.894	0.03807
Pdha1	-0.4853	6.018	0.01061	-0.4675	4.853	0.01874	-0.4112	5.855	0.01404
Pea15a	-0.3306	6.432	0.0448	-0.714	6.991	0.02978	-1.08	8.339	0.004223
Pgrmc1	-0.4824	4.156	0.0102	-0.4084	4.718	0.01239	-0.5058	5.162	0.006488
Phka2	0.3591	4.968	0.0373	0.2938	6.653	0.02644	0.2957	5.433	0.01664
Pithd1	-0.4814	3.068	0.02075	-0.4408	3.491	0.04884	-0.5124	4.922	0.01019
Pot1b	0.7043	5.734	0.005968	0.6105	6.109	0.004761	0.5002	5.458	0.00252
Ppia	-0.533	4.925	0.03846	-0.8327	5.394	0.02014	-0.917	6.301	0.002552
Ppib	-0.5382	4.907	0.02407	-0.4969	5.362	0.04761	-0.2714	5.078	0.04021
Ppp1r11	-0.2925	3.343	0.04874	-0.4928	4.471	0.02606	-0.5951	3.991	0.01015
Ppp1r13b	0.6738	4.286	0.01174	-0.3846	5.249	0.02392	1.979	5.367	0.00778
Pqbp1	-0.4346	3.432	0.03954	-0.6235	4.117	0.009807	-0.5736	4.372	0.005107
Prnp	-0.6703	8.973	0.00808	0.7835	2.624	0.01803	-0.4298	8.428	0.00921
Rab1b	-0.3514	4.283	0.02652	-0.3466	4.913	0.04083	-0.4275	5.097	0.004472
Rab6b	1.804	4.668	0.01061	0.7981	7.025	0.005851	0.8991	6.324	0.005077
Rabac1	-0.6702	3.714	0.02379	-0.4337	4.275	0.04131	-0.6695	5.056	0.005483
Rasgrf2	1.591	0.5645	0.0182	1.739	3.813	0.001702	1.914	0.8485	0.01251
Rbbp8	0.5763	2.856	0.01429	0.5989	3.702	0.02622	1.229	1.5	0.009315
Rcn2	-0.4939	6.781	0.01361	-0.4478	4.969	0.01387	-0.3872	4.731	0.01524
Reep5	-0.2831	5.827	0.0399	-0.4078	6.327	0.01542	-0.2526	7.461	0.03669
Rfesd	-0.5273	3.096	0.03048	-0.5468	2.834	0.04302	-0.5548	3.386	0.02028
Rgs2	1.405	3.52	0.01955	-0.6459	7.73	0.03726	1.477	3.435	0.04313
Rida	-0.3165	5.009	0.03152	0.666	2.36	0.03456	-0.6781	4.105	0.00652
Rn18s-rs5	-0.6359	16.1	0.01013	-0.6038	16.84	0.02406	-0.6668	16.81	0.002996
Rnf113a2	-0.6297	2.021	0.02829	-0.7938	1.724	0.01944	-0.854	3.171	0.003134
Rnf17	2.142	0.6512	0.01419	1.624	3.096	0.001009	2.467	0.1377	0.00112
Rraga	-0.6406	3.789	0.02515	-0.5518	3.632	0.01269	-0.7366	4.908	0.002472
Rsl1	1.011	0.972	0.01735	0.6914	2.522	0.01618	1.309	0.5167	0.009266
Rttn	0.2641	5.009	0.04571	0.4895	5.295	0.01203	0.3435	5.288	0.01819
Saraf	-0.6045	5.8	0.009937	-0.4925	6.254	0.007715	-0.4388	6.085	0.01467
Scg3	-0.5576	8.746	0.02331	1.07	1.695	0.01821	-0.4459	4.839	0.02062
Scml2	-1.183	1.728	0.00621	-3.931	-0.2378	0.000478	-2.321	2.155	0.0003561
Sec24a	0.2536	5.871	0.04168	0.3707	5.613	0.02133	0.3219	5.341	0.0454
Selenof	-0.2948	5.784	0.04706	-0.4078	6.33	0.01946	-0.5376	6.384	0.00539
Selenok	-0.5797	4.842	0.01057	-0.4825	5.147	0.04517	-0.5629	6.323	0.006627
Selenon	-0.6893	4.373	0.004505	-0.9814	3.816	0.00139	-0.7348	3.908	0.001101
Selenop	-0.6208	8.726	0.04788	-0.5153	10.31	0.008951	-0.5935	9.508	0.004523
Selenos	-0.7728	5.152	0.004362	-0.4702	5.079	0.04324	-0.526	5.424	0.01623
Selenot	-0.2046	5.645	0.04341	-0.3472	6.298	0.0317	-0.3033	6.878	0.02488
Serinc1	-0.5075	7.695	0.02103	-0.3044	7.351	0.04806	-0.3476	8.253	0.0268
Sf3b5	-0.873	0.8798	0.03464	-0.8361	1.764	0.01874	-0.9482	2.536	0.003695
Sfmbt2	-0.8904	4.329	0.01127	-1.867	5.221	0.0004167	-2.821	3.053	0.001509
Shq1	0.8468	2.34	0.02801	0.425	4.473	0.03044	0.3963	3.667	0.03436
Skp1	-0.5119	5.832	0.02138	-0.4789	5.723	0.006485	-0.7155	6.912	0.002963
Slc10a7	0.3622	6.982	0.04967	0.2584	6.893	0.03384	0.2805	6.435	0.03487
Slc25a4	-0.8122	6.577	0.005592	-0.3948	4.744	0.03143	-0.7183	6.931	0.001134
Smg9	0.6191	3.467	0.03271	0.48	5.045	0.04806	0.4995	3.926	0.03233
Smim15	-0.4592	3.786	0.03128	-0.3702	4.585	0.04152	-0.3651	5.568	0.01931
Snapin	-0.3689	4.311	0.03587	-0.3346	4.541	0.04075	-0.3273	5.834	0.01282
Sod1	-0.5166	4.601	0.02983	-0.8233	4.013	0.003228	-0.5448	4.513	0.01068
Sparcl1	-0.4384	11.31	0.02869	1.025	4.714	0.04083	-0.8488	5.472	0.007321
Spcs2	-0.4014	5.478	0.01627	-0.4823	6.456	0.03215	-0.319	5.982	0.02762
Spopl	0.3084	5.739	0.01969	0.359	6.493	0.02014	0.3064	5.588	0.02795
Stpg1	2.43	-0.4742	0.0102	2.483	1.523	0.00065	2.321	0.4719	0.001363
Syf2	-0.4545	4.177	0.03347	-0.4177	4.883	0.03324	-0.6433	5.849	0.002469
Taf1a	0.2988	3.59	0.03115	0.6366	3.518	0.006485	0.377	3.389	0.02436
Tatdn3	0.8815	4.08	0.004204	1.453	3.66	0.0004633	1.001	3.369	0.002868
Tbc1d9	1.647	4.098	0.03704	0.7225	8.184	0.04989	3.714	3.04	0.01246
Tecpr2	0.3632	5.643	0.01838	0.5371	4.803	0.003932	0.6697	6.653	0.0009424
Tlr3	-0.3246	6.26	0.04734	-0.277	5.779	0.03822	1.811	1.171	0.01629
Tm2d2	-0.7206	3.737	0.008372	-0.4263	3.832	0.04378	-0.4286	4.556	0.034
Tmco1	-0.6627	5.2	0.007986	-0.397	5.402	0.01922	-0.4605	4.999	0.02362
Tmed10	-0.3117	6.371	0.0282	-0.3478	6.969	0.04695	-0.2954	6.897	0.01236
Tmem115	-0.7976	3.804	0.006748	-0.3728	3.203	0.04294	-0.4573	3.451	0.015
Tmem132a	-0.5218	3.147	0.02106	-0.5291	1.731	0.04613	-0.8583	2.704	0.002608
Tmem229a	-0.4725	6.024	0.01357	1.148	0.7762	0.04652	-0.6087	7.515	0.001533
Tmem30a	-0.2955	6.065	0.01381	-0.2725	6.659	0.03817	-0.4512	7.641	0.004611
Tmem59	-0.5933	6.572	0.008758	-0.2513	6.804	0.03273	-0.4125	6.902	0.007559
Tmem60	-0.6422	3.099	0.02295	-0.778	2.926	0.0151	-0.8244	3.672	0.001581
Tmx2	-0.6439	5.171	0.01032	-0.5379	3.929	0.01939	-0.3637	4.838	0.01549
Trak1	0.2314	8.201	0.02711	0.6987	7.033	0.007849	0.9738	4.409	0.007321
Trappc2l	-0.522	1.421	0.04062	-0.621	2.721	0.03506	-1.088	3.097	0.001344
Trim5	1.113	1.975	0.0273	0.3981	4.738	0.03157	2.371	0.3126	0.028
Trmt1l	0.2332	5.269	0.04571	0.2675	5.807	0.04647	0.5953	4.811	0.004875
Trmt6	0.6253	3.525	0.009242	0.4508	4.237	0.03701	0.3339	4.405	0.0443
Tspan3	-0.7787	6.978	0.004362	-0.4833	5.308	0.01838	-0.6351	6.528	0.003972
Ttc13	0.281	5.361	0.03266	0.285	6.167	0.03456	0.5865	4.735	0.003323
Tuba1a	-0.6047	4.672	0.03872	-0.8784	4.524	0.003034	-0.8346	8.242	0.0008366
Tubb4b	-0.57	4.601	0.03541	-0.6273	3.034	0.01781	-0.8632	4.837	0.001225
Txnrd1	-0.3913	4.726	0.01952	-0.5933	5.379	0.003784	-0.476	5.053	0.004359
Ubb	-0.74	4.734	0.02138	-0.86	5.736	0.01905	-0.918	6.496	0.00162
Ubc	-2.09	4.934	0.001453	-1.63	5.687	0.0001442	-1.253	6.311	0.0003112
Ubiad1	-0.7995	3.454	0.005592	-0.8661	2.568	0.01838	-0.7546	2.436	0.01853
Ubl5	-0.4637	2.719	0.04506	-0.4486	3.818	0.04065	-0.4898	4.167	0.01029
Ulk4	1.657	3.5	0.009417	2.112	4.419	0.008858	1.255	3.099	0.002585
Xbp1	-0.5353	4.129	0.01532	-0.5453	5.871	0.01508	-0.738	4.766	0.002733
Xpr1	-0.354	8.625	0.03427	-1.293	7.83	0.0001277	-1.657	6.752	3.51e-05
Zbed4	0.3697	3.819	0.03064	0.4163	3.978	0.04065	0.4589	3.364	0.04113
Zc3hav1l	-1.379	1.453	0.006722	-2.311	1.442	0.002847	-2.932	0.7965	0.0007121
Zfp125	4.533	-0.5506	0.01015	5.05	0.3438	0.002949	4.56	-0.3724	0.002264
Zfp386	-0.3523	4.631	0.0373	-0.4701	3.797	0.023	-0.4677	4.176	0.007548
Zfp457	-0.7565	2.461	0.02948	-1.357	0.8957	0.01062	-1.936	1.157	0.002585
Zfp458	-0.4619	3.753	0.03782	-0.9003	2.878	0.01887	-0.7335	3.708	0.00766
Zfp706	-0.3739	4.616	0.0307	-0.4593	6.048	0.01002	-0.592	6.949	0.0007121
Zfp729a	-1.454	4.91	0.00959	-1.205	5.314	0.01561	-0.842	4.99	0.01043
Zfp808	0.3498	4.716	0.04698	0.535	4.593	0.005638	1.232	2.237	0.01864
Zfp951	1.264	2.964	0.01439	0.6868	5.765	0.004301	1.643	2.582	0.005083
Zkscan3	0.3516	6.25	0.0278	0.2953	5.986	0.01952	0.2621	5.274	0.04045
Zup1	0.2525	6.201	0.03979	0.3103	7.252	0.01561	0.6034	5.335	0.001533
