# Supplementary material for: P2RX7 regulates tauopathy progression via tau and mitochondria loading in extracellular vesicles
Source: Research Square preprint supplement (doi:10.21203/rs.3.rs-6771517/v1), 2025-06-23
Supplement: Supplementary file 3 [file 5e6df4c2f1c80d506c7eaa48.xlsx]

## Sheet: Brain-EV prot_DEP
Brain-EV proteomics analysis
		WT					PS19					PS19/P2rx7-/-					Mean			Log2 Fold change			P-value (two-tailed Student’s t test)			Log 10 Fold Change			Number of identified samples
PG.Genes	PG.ProteinDescriptions	WT_1	WT_2	WT_3	WT_4	WT_5	PS19_1	PS19_2	PS19_3	PS19_4	PS19_5	PS19/P2rx7KO_1	PS19/P2rx7KO_2	PS19/P2rx7KO_3	PS19/P2rx7KO_4	PS19/P2rx7KO_5	WT	PS19	PS19/P2rx7KO	(PS19/WT)	(PS19:P2rx7KO/WT)	(PS19:P2rx7KO/PS19)	(PS19/WT)	(PS19:P2rx7KO/WT)	(PS19:P2rx7KO/PS19)	(PS19/WT)	(PS19:P2rx7KO/WT)	(PS19:P2rx7KO/PS19)	WT	PS19	PS19/P2rx7KO
Mapt	Microtubule-associated protein tau	9.17741	9.91037	9.40244	9.85118	9.57977	12.3067	11.9173	12.603	12.4345	11.8115	10.8588	11.1345	10.9237	11.4604	11.8121	9.58423	12.2146	11.2379	2.63037	1.65368	-0.976695	1.25164e-06	7.88761e-05	0.0030717	5.90252	4.10305	2.51262	5	5	5
Acaa2	3-ketoacyl-CoA thiolase, mitochondrial	8.50417		8.27295	8.40354	8.27729	9.31644	9.30195	9.61216	9.49586	9.55051	8.96634	8.95273	8.77442	8.74077	8.82717	8.36449	9.45538	8.85229	1.09089	0.487796	-0.603098	4.38813e-06	0.000245425	5.35952e-05	5.35772	3.61008	4.27087	4	5	5
Dpysl3	Dihydropyrimidinase-related protein 3	10.9583	10.7972	10.737	11.0482	10.9262	11.7503	11.9953	11.8387	11.6087	11.5947	10.9919	10.7858	10.741	10.7207	10.9873	10.8934	11.7575	10.8453	0.864143	-0.0480421	-0.912185	1.52216e-05	0.574233	1.21932e-05	4.81754	0.240912	4.91388	5	5	5
Znf512	Zinc finger protein 512	7.80065	8.21228	7.96112	8.04219	8.00216	6.88966		7.13627	7.10145	6.81652	7.59816	7.68603	7.62435	7.39262	6.97551	8.00368	6.98598	7.45533	-1.0177	-0.548346	0.469359	2.1764e-05	0.00551006	0.0233129	4.66226	2.25884	1.6324	5	4	5
Asrgl1	Isoaspartyl peptidase/L-asparaginase	8.44106	8.60445	8.35523	8.67762	8.35798	9.18271	9.03807	9.23844	9.34602	9.2077	9.00834	8.8926	8.82949	8.80948	9.05701	8.48727	9.20259	8.91938	0.715321	0.432118	-0.283203	2.40148e-05	0.000746678	0.00360847	4.61952	3.12687	2.44268	5	5	5
Gad2	Glutamate decarboxylase 2	7.28561	7.27235	7.14301	7.13635	7.29439	7.8559	7.82367	8.06451	7.93625	8.26662	7.87047	7.94753	7.6219	7.88022	8.20722	7.22634	7.98939	7.90547	0.763053	0.679127	-0.0839262	2.49421e-05	0.000140014	0.516396	4.60307	3.85383	0.287017	5	5	5
Jmy	Junction-mediating and -regulatory protein	7.05824		7.40865	7.54431	7.1897	9.15449		9.61366	9.79848	10.0199	8.37332	9.55682	7.90207	9.63643	9.9252	7.30023	9.64664	9.07877	2.34641	1.77854	-0.567869	3.38697e-05	0.00610801	0.272936	4.47019	2.2141	0.563938	4	4	5
Gabra5	Gamma-aminobutyric acid receptor subunit alpha-5	9.86516	9.89023	9.66384	9.98096	9.80935	9.15711	8.59191	9.059	8.97195	9.01577	9.32809	9.57717	9.79232	9.30012	9.51512	9.84191	8.95915	9.50256	-0.882762	-0.339343	0.543419	4.29309e-05	0.0114468	0.00335949	4.36723	1.94132	2.47373	5	5	5
Aco2	Aconitate hydratase, mitochondrial	9.6739	10.0579	9.85034	9.86838	9.71423	10.4494	10.8217	10.9368	10.5805	10.814	9.77092	10.0762	9.83395	9.88766	9.91938	9.83295	10.7205	9.89761	0.887526	0.0646668	-0.82286	4.64273e-05	0.468023	4.3522e-05	4.33323	0.329733	4.36129	5	5	5
Hspe1	10 kDa heat shock protein, mitochondrial	7.9064	7.09599	7.41759	8.0631	7.66398	8.95022	9.09367	9.41422	9.61085	9.5489	8.17872	7.84442	7.85317	7.93763	8.16033	7.62941	9.32357	7.99486	1.69416	0.365444	-1.32872	4.95764e-05	0.0870188	1.93263e-05	4.30472	1.06039	4.71385	5	5	5
Zzef1	Zinc finger ZZ-type and EF-hand domain-containing protein 1	10.4932		10.3142	10.4784	10.0622	11.3885		11.2993	11.3534	11.3538	10.8126	10.2627	10.6134	10.1574	10.171	10.337	11.3488	10.4034	1.01175	0.0663884	-0.945364	6.02008e-05	0.712767	0.000402923	4.2204	0.147052	3.39478	4	4	5
Pkm	Pyruvate kinase PKM	10.3829	10.7509	10.3628	10.7619	10.3079	11.1903	11.6339	11.4293	11.5367	11.4041	10.4887	10.4154	10.358	10.6262	11.0324	10.5133	11.4389	10.5841	0.925571	0.0708399	-0.854732	7.44681e-05	0.663377	0.000313673	4.12803	0.17824	3.50352	5	5	5
Zdhhc2	Palmitoyltransferase ZDHHC2	5.22887		5.68989	5.11568		7.33709	7.11941	7.35007	7.15819	6.76815	6.86852	7.39232	6.49663			5.34481	7.14658	6.91916	1.80177	1.57435	-0.227422	7.87079e-05	0.00738264	0.372501	4.10398	2.13179	0.428872	3	5	3
Mdh2	Malate dehydrogenase, mitochondrial	8.94277	9.21269	8.90828	9.56794	9.04099	10.263	10.6092	10.6156	9.99821	10.313	9.13865	9.01674	8.93553	9.0812	9.15758	9.13453	10.3598	9.06594	1.22525	-0.068594	-1.29384	8.24104e-05	0.604612	5.86032e-06	4.08402	0.218523	5.23208	5	5	5
Tm9sf4	Transmembrane 9 superfamily member 4	10.9948	11.0409	10.7744	10.6101	10.7842	10.2323	10.2166	10.1369	10.3362	10.1595	10.2822	10.3936	10.4558	10.6298	10.8708	10.8409	10.2163	10.5264	-0.624556	-0.314441	0.310115	8.87717e-05	0.0414963	0.0212639	4.05173	1.38199	1.67236	5	5	5
Adcy6	Adenylate cyclase type 6	7.59306		7.63518	7.57915	7.73235	7.30765	7.40338	7.35976	7.30943	7.29644	7.33763	7.38866	7.09396	7.44948	7.3655	7.63494	7.33533	7.32705	-0.299602	-0.307887	-0.0082852	0.000101003	0.00475531	0.900771	3.99567	2.32282	0.0453855	4	5	5
Aldoa	Fructose-bisphosphate aldolase A	10.3016	10.6336	10.379	10.6931	10.427	10.9819	11.3652	11.396	11.3145	11.1662	10.3822	10.3242	10.1227	10.2941	10.7143	10.4869	11.2448	10.3675	0.757894	-0.119371	-0.877264	0.000107097	0.359219	0.000101771	3.97022	0.44464	3.99238	5	5	5
Acat1	Acetyl-CoA acetyltransferase, mitochondrial	8.17253	7.95929	8.28873	8.14477	8.35703	8.82001	9.03063	9.44698	8.94575	9.19121	8.19207	8.57046	8.26301	7.92821	7.79794	8.18447	9.08692	8.15034	0.902449	-0.0341318	-0.936581	0.000107416	0.827121	0.000638051	3.96893	0.0824311	3.19514	5	5	5
Pcca	Propionyl-CoA carboxylase alpha chain, mitochondrial	6.8564		6.85477	6.56276	7.0692	7.64622	7.904	8.22182	7.86353	7.94617	7.24646	7.39944	7.17316	7.18383	7.25514	6.83578	7.91635	7.2516	1.08057	0.41582	-0.664745	0.000108694	0.00475539	0.000169021	3.9638	2.32281	3.77206	4	5	5
Oxct1	Succinyl-CoA:3-ketoacid coenzyme A transferase 1, mitochondrial	8.37901	8.6438	8.7379	8.91302	8.67702	9.25867	9.55399	9.35292	9.29834	9.30343	8.86517	9.14908	8.5785	9.01905	8.59219	8.67015	9.35347	8.8408	0.683321	0.170648	-0.512673	0.000142273	0.265899	0.00343909	3.84688	0.575283	2.46356	5	5	5
Sparcl1	SPARC-like protein 1	6.31315	6.00045	6.3769	6.28533	6.41105	6.84877	7.25072	7.09021	7.1327	6.81677	6.27907	6.14993	6.31459	6.57668	6.48785	6.27738	7.02783	6.36162	0.750458	0.0842476	-0.66621	0.000144568	0.446836	0.000372187	3.83993	0.349852	3.42924	5	5	5
Calr	Calreticulin	7.51091	7.86531	7.24949	7.41723	7.46042	8.23502	8.69902	8.77053	8.46079	8.28833	7.50111	7.40522	7.41557	7.78486	7.94618	7.50067	8.49074	7.61059	0.990064	0.109915	-0.880149	0.000149039	0.479816	0.000415566	3.8267	0.318925	3.38136	5	5	5
Hcn3	Potassium/sodium hyperpolarization-activated cyclic nucleotide-gated channel 3	6.10532		6.25879			8.73085	8.72567	9.29625	9.33289	8.57364	9.11004	8.9282	8.31387			6.18205	8.93186	8.78404	2.74981	2.60199	-0.147822	0.000153652	0.00375613	0.610685	3.81346	2.42526	0.214183	2	5	3
Gnao1	Guanine nucleotide-binding protein G(o) subunit alpha	13.4343	13.4811	13.6179	13.7	13.4619	13.8271	13.9159	13.9183	13.9435	13.9175	13.7263	13.8067	13.8465	14.1748	13.9734	13.539	13.9045	13.9055	0.365424	0.366491	0.00106631	0.000160819	0.00442116	0.98979	3.79366	2.35446	0.00445699	5	5	5
Map6	Microtubule-associated protein 6	7.62142	8.00237	7.83194	8.42777	7.86283	8.71089	8.87599	9.05425	9.06465	9.08043	8.1312	7.85749	7.94014	8.03738	8.07031	7.94927	8.95724	8.0073	1.00797	0.0580362	-0.949939	0.000166195	0.695039	4.30227e-06	3.77938	0.157991	5.3663	5	5	5
Cetn2	Centrin-2	6.40431		6.36171	6.2713	6.0721	6.82341	6.86797	6.74553	6.91122	6.74319	6.53651	6.67545	6.63068	6.11727	7.04628	6.27736	6.81826	6.60124	0.540909	0.323883	-0.217026	0.000175355	0.11627	0.192417	3.75608	0.934532	0.715756	4	5	5
Ddx6	Probable ATP-dependent RNA helicase DDX6	9.17576	9.38541	9.10064	8.93906	9.22516	8.59819	8.68557	8.27369	8.42171	8.52065	9.04029	9.40278	9.09839	9.1371	9.32094	9.1652	8.49996	9.1999	-0.665244	0.0346939	0.699938	0.000187678	0.739473	0.000107629	3.72659	0.131077	3.96807	5	5	5
Prex2	Phosphatidylinositol 3,4,5-trisphosphate-dependent Rac exchanger 2 protein	5.28652	5.52311	5.24146	5.38349		5.85		6.00736	5.90168	5.94971	5.50642	5.65786	5.41884	5.70456	5.81415	5.35865	5.92719	5.62037	0.568543	0.261719	-0.306824	0.000199189	0.0306741	0.00877565	3.70073	1.51323	2.05672	4	4	5
Cfl1	Cofilin-1	9.98849	10.0163	10.2634	10.6768	10.0421	10.9076	11.1883	11.177	11.4565	11.3059	10.4392	10.7731	10.243	10.7411	11.3217	10.1974	11.2071	10.7036	1.00965	0.50617	-0.503481	0.000209077	0.0539012	0.038916	3.67969	1.2684	1.40987	5	5	5
Suclg2	Succinate--CoA ligase [GDP-forming] subunit beta, mitochondrial	5.60166		6.0214	5.73379	5.60144	6.34884	6.37031	6.54944	6.42408	6.5859	5.78759	6.16636	5.07028	5.93024	6.1545	5.73957	6.45571	5.82179	0.71614	0.0822224	-0.633917	0.000212346	0.745822	0.0153403	3.67296	0.127365	1.81417	4	5	5
Tspan13	Tetraspanin-13	9.34038	9.83701	9.37692	9.44924	9.48543	8.72979	8.64223	7.91874	7.96329	8.19923	9.23071	8.77653	8.81468	8.70744	8.25796	9.4978	8.29066	8.75746	-1.20714	-0.740333	0.466808	0.000225302	0.00321024	0.0759777	3.64723	2.49346	1.11931	5	5	5
Osbpl9	Oxysterol-binding protein-related protein 9	8.53105		9.25328	8.98015	9.37977	7.86611	7.94555	7.43663	7.58096	7.43845	7.9279	8.00522	7.50195	7.66092	7.75659	9.03606	7.65354	7.77051	-1.38252	-1.26555	0.116974	0.000264966	0.000330675	0.428358	3.57681	3.4806	0.368193	4	5	5
Sod2	Superoxide dismutase [Mn], mitochondrial	7.37043		7.30227	7.87173	7.45553	8.48139	9.20581	8.95405	8.51533	8.77018	7.56915	7.93455	7.55703	7.58727	7.61136	7.49999	8.78535	7.65187	1.28536	0.151883	-1.13348	0.000269043	0.308504	7.79964e-05	3.57018	0.51074	4.10793	4	5	5
P4hb	Protein disulfide-isomerase	6.89435		6.87968	6.87465	7.02016	7.63332	8.20468	7.96799	8.38442	7.75802	7.11862	7.41815	7.1279	7.50608	7.77669	6.91721	7.98969	7.38949	1.07248	0.472276	-0.600202	0.00027516	0.0132964	0.0120028	3.56041	1.87626	1.92072	4	5	5
Lrrc57	Leucine-rich repeat-containing protein 57	9.64884	9.87513	9.75157	9.75894	10.0886	9.40794	9.35634	9.11599	9.20508	9.25239	9.77425	10.0277	9.72624	9.50164	9.36905	9.82461	9.26755	9.67977	-0.557059	-0.144832	0.412227	0.000293367	0.319974	0.0111189	3.53259	0.494885	1.95394	5	5	5
Ldhb	L-lactate dehydrogenase B chain	11.105	10.7632	11.0399	11.681	11.1035	12.0456	12.4452	12.1373	12.0505	12.094	11.3623	11.1641	11.3134	11.2476	11.6871	11.1385	12.1545	11.3549	1.016	0.216404	-0.7996	0.000295547	0.249417	0.000128735	3.52937	0.603075	3.8903	5	5	5
Eno1	Alpha-enolase	9.68285	10.0219	9.75328	10.3761	9.80056	10.6051	11.0149	10.7606	10.8155	10.7445	9.99826	9.79332	9.80356	9.96587	10.3371	9.92693	10.7881	9.97963	0.861181	0.0526945	-0.808486	0.000304731	0.750003	0.000137255	3.51608	0.124937	3.86247	5	5	5
Nudc	Nuclear migration protein nudC	6.42671		6.09648	6.66993	5.76897	7.4052	7.28573	7.71596	7.61155	7.50574	6.75295	6.98796	6.24489	6.73435	7.6886	6.24052	7.50484	6.88175	1.26431	0.641228	-0.623086	0.000312945	0.0831985	0.0356581	3.50453	1.07988	1.44784	4	5	5
Syt1	Synaptotagmin-1	13.1189	13.3245	13.2753	13.1454	13.208	13.4839	13.5185	13.5236	13.6716	13.727	13.5097	13.8047	13.3974	13.604	13.6608	13.2144	13.5849	13.5953	0.370484	0.380877	0.0103935	0.000317191	0.00130766	0.904461	3.49868	2.88351	0.04361	5	5	5
Dpysl2	Dihydropyrimidinase-related protein 2	11.6362	11.6281	11.7021	12.235	11.7003	12.4388	12.738	12.5496	12.5135	12.4597	11.9286	11.8491	11.57	12.1184	12.4125	11.7804	12.5399	11.9757	0.759561	0.195353	-0.564208	0.000321159	0.312597	0.00555538	3.49328	0.505016	2.25529	5	5	5
Cpne6	Copine-6	11.246	11.6295	11.338	11.3572	11.4501	10.9819	10.836	10.8472	10.7836	11.0712	11.2898	11.2159	11.1765	11.0459	11.8362	11.4042	10.904	11.3129	-0.50018	-0.0913126	0.408867	0.000338262	0.563024	0.0236264	3.47075	0.249473	1.6266	5	5	5
Spock2	Testican-2	8.1702		8.07962	7.92765	8.12379	8.53856	9.0608	8.70502	8.90706	8.75983	8.22436	8.30092	8.01672	8.4685	8.67176	8.07532	8.79425	8.33645	0.718936	0.261136	-0.4578	0.00034048	0.0922345	0.0122363	3.46791	1.03511	1.91235	4	5	5
Apeh	Acylamino-acid-releasing enzyme	6.95136		7.01023	7.34504		7.99487	7.7361	7.94323	8.06028	7.95089	7.58831	7.51929	7.13494	7.4135	7.91422	7.10221	7.93707	7.51405	0.834864	0.41184	-0.423024	0.000350772	0.0742681	0.0152454	3.45498	1.1292	1.81686	3	5	5
Pitpnm3	Membrane-associated phosphatidylinositol transfer protein 3	8.94822	8.92051	8.48869	8.42025	8.77327	8.18184	7.82004	7.73581	7.5006	7.66544	8.44488	8.4338	8.35141	8.18947	8.23916	8.71019	7.78075	8.33174	-0.929442	-0.378446	0.550996	0.000356664	0.0137938	0.00218098	3.44774	1.86032	2.66135	5	5	5
Hspa8	Heat shock cognate 71 kDa protein	11.2039	11.7667	11.3534	11.5737	11.2795	11.965	12.2474	12.1416	12.2617	12.048	11.4994	11.583	11.2649	11.7888	12.1603	11.4355	12.1327	11.6593	0.697266	0.223842	-0.473424	0.000358972	0.255557	0.0188121	3.44494	0.592512	1.72556	5	5	5
Sptbn2	Spectrin beta chain	8.74088	8.78281	8.90478	8.7714	8.86146	8.43333	8.36168	8.37834	8.61772	8.54998	9.11322	9.19644	9.02536	8.87132	9.09688	8.81226	8.46821	9.06064	-0.344053	0.248381	0.592434	0.000366756	0.00410917	4.31068e-05	3.43562	2.38625	4.36545	5	5	5
Sdf4	45 kDa calcium-binding protein	5.3758		5.24723	5.52743	4.44959	6.67831	6.78905	7.25354	7.82791	7.16209	5.61656	5.39891	6.10369	5.86965		5.15001	7.14218	5.7472	1.99217	0.59719	-1.39498	0.000374119	0.0808969	0.0012021	3.42699	1.09207	2.92006	4	5	4
Chrm1	Muscarinic acetylcholine receptor M1	9.65416	10.5989	9.84092	10.0305	9.75369	9.08181	8.97703	8.86982	9.02544	8.89364	9.61382	9.4548	9.40217	9.46339	9.2255	9.97563	8.96955	9.43194	-1.00608	-0.543689	0.46239	0.000387463	0.0160984	0.00024659	3.41177	1.79322	3.60802	5	5	5
Rtn4	Reticulon-4	9.909	9.9432	9.94027	9.90624	9.68571	10.1903	10.5833	10.3413	10.3449	10.2811	9.84712	10.1658	10.0269	10.4752	10.6991	9.87688	10.3482	10.2428	0.471311	0.365945	-0.105367	0.000400671	0.0526017	0.545078	3.39721	1.279	0.263541	5	5	5
Cadm4	Cell adhesion molecule 4	10.3408	10.6802	10.3689	10.7718	10.5441	11.1307	11.1099	11.2665	11.02	10.996	10.3235	10.104	10.3107	10.6853	10.3103	10.5412	11.1047	10.3468	0.563476	-0.194406	-0.757882	0.000401077	0.162307	9.39141e-05	3.39677	0.789664	4.02727	5	5	5
Pitpnm2	Membrane-associated phosphatidylinositol transfer protein 2	9.70314	10.065	9.27792	9.30039	9.63797	8.76473	8.83586	8.49869	8.7129	8.66041	9.28012	9.4545	9.35667	8.95609	9.11887	9.59689	8.69452	9.23325	-0.902369	-0.363634	0.538735	0.000411871	0.0648831	0.000902093	3.38524	1.18787	3.04475	5	5	5
Slc25a1	Tricarboxylate transport protein, mitochondrial	7.80022	7.63239	7.36393	6.95984	7.41443	8.07407	8.58602	8.59651	8.40385	8.41697	7.52757	8.32102	7.72452	8.01148	8.0985	7.43416	8.41548	7.93662	0.981322	0.502456	-0.478865	0.000428084	0.0358415	0.0219653	3.36847	1.44561	1.65826	5	5	5
Pitpnc1	Cytoplasmic phosphatidylinositol transfer protein 1	9.10823	9.30793	8.9691	9.01587	9.24373	8.67578	8.4722	8.48818	8.0127	8.20278	9.25965	8.82008	8.91273	8.113	8.10239	9.12897	8.37033	8.64157	-0.758644	-0.487402	0.271243	0.000468102	0.0756541	0.323786	3.32966	1.12117	0.489742	5	5	5
Nucb1	Nucleobindin-1	7.33913	9.03242	7.3539	7.34791	7.7663	9.47324	9.63953	9.91873	10.5011	9.80478	7.47193	7.68031	7.48148	8.17426	8.42153	7.76793	9.86747	7.8459	2.09954	0.0779702	-2.02157	0.000472505	0.842064	5.3952e-05	3.32559	0.0746547	4.26799	5	5	5
Tex264	Testis-expressed protein 264 homolog	6.81618		6.88549	6.74208	6.54948	7.22781	7.52318	7.76032	7.84205	7.83057	7.4037	7.59935	8.08356	8.34127	8.65857	6.74831	7.63679	8.01729	0.888481	1.26898	0.380503	0.000528162	0.00221274	0.180752	3.27723	2.65507	0.742918	4	5	5
Cst3	Cystatin-C	7.8084		7.60445	7.65389	7.70673	7.9772	8.30758	8.0714	8.15677	8.12681	7.76552	7.89828	7.87887	7.96677	8.05753	7.69337	8.12795	7.91339	0.434585	0.220029	-0.214556	0.000548024	0.0133944	0.0184783	3.2612	1.87308	1.73334	4	5	5
Pcyox1	Prenylcysteine oxidase 1	9.67402	9.89068	9.40046	9.39029	9.55624	10.0028	10.6002	10.7505	10.486	10.3992	9.6377	10.0538	10.1963	10.6032	10.8088	9.58234	10.4477	10.26	0.865378	0.677622	-0.187756	0.000557726	0.0173237	0.459831	3.25358	1.76136	0.337402	5	5	5
Stum	Protein stum homolog	11.547	12.2323	11.1818	11.5473	11.7278	10.8385	10.0506	10.6121	9.99295	10.1962	11.1774	10.4541	11.0678	10.5328	10.0021	11.6472	10.3381	10.6469	-1.30918	-1.0004	0.308782	0.000573244	0.0065812	0.287968	3.24166	2.1817	0.540655	5	5	5
Vcp	Transitional endoplasmic reticulum ATPase	9.76503	10.0702	9.78941	9.75333	9.88712	10.2522	10.4257	10.2614	10.5749	10.2159	9.76957	10.0299	9.71202	9.83227	9.96211	9.85302	10.346	9.86117	0.49301	0.00814535	-0.484865	0.000585225	0.92489	0.000652387	3.23268	0.0339097	3.18549	5	5	5
Prps2	Ribose-phosphate pyrophosphokinase 2			5.92155	5.53728		7.50107	7.36214	7.27817	7.94799	7.83835	6.97349	7.89012	7.70064	7.61773	7.57658	5.72941	7.58554	7.55171	1.85613	1.8223	-0.0338315	0.00060805	0.00122712	0.87167	3.21606	2.91111	0.0596478	2	5	5
Depdc5	GATOR complex protein DEPDC5	9.63606	9.44556	9.42054	8.99759	9.09798	8.87277	8.0788	8.27857	8.14655	8.16572	9.19447	9.31375	9.08699	9.10925	9.05704	9.31955	8.30848	9.1523	-1.01106	-0.167245	0.843819	0.000635842	0.223999	0.000538666	3.19665	0.649753	3.26868	5	5	5
Entpd6	Ectonucleoside triphosphate diphosphohydrolase 6	8.24495	8.34685	7.96825	7.73292	7.79997	9.14319	8.73464	8.60737	9.27382	9.19044	8.43045	8.0162	8.15384	8.83557	9.45598	8.01859	8.98989	8.57841	0.971304	0.55982	-0.411485	0.000644953	0.0867575	0.197035	3.19047	1.06169	0.705457	5	5	5
Ncald	Neurocalcin-delta	10.9307	11.0052	10.8832	10.9567	10.8373	10.4895	10.7165	10.5014	10.7131	10.6416	10.875	11.1984	11.0412	11.3397	11.3284	10.9226	10.6124	11.1565	-0.310195	0.233916	0.544111	0.000651225	0.0366096	0.000683661	3.18627	1.43641	3.16516	5	5	5
Gna14	Guanine nucleotide-binding protein subunit alpha-14	9.00177	8.27463	9.00872	9.11045	9.18164	9.77777	10.0612	10.0233	9.81217	9.70535	9.6188	9.67506	9.42683	9.99417	10.0922	8.91544	9.87596	9.76142	0.960518	0.845973	-0.114545	0.00065176	0.00329703	0.442591	3.18591	2.48188	0.353998	5	5	5
Stip1	Stress-induced-phosphoprotein 1	8.19185	8.94734	8.25986	8.6957	8.47656	9.25721	9.41105	9.243	9.553	9.22273	8.53315	8.56117	8.27871	8.63513	9.05531	8.51426	9.3374	8.6127	0.823138	0.0984332	-0.724705	0.000674404	0.614916	0.000883438	3.17108	0.211185	3.05382	5	5	5
Ipo9	Importin-9	5.65156		5.06035	5.53755	5.06607	7.40721	6.35566	6.999	7.74373	7.82324	6.70735	6.35099	6.43286	5.54846	5.85518	5.32888	7.26577	6.17897	1.93688	0.850084	-1.0868	0.000678135	0.0171534	0.0129751	3.16868	1.76565	1.88689	4	5	5
Pitpna	Phosphatidylinositol transfer protein alpha isoform	10.3503	10.6217	10.2573	10.2424	10.6744	9.64168	10.0485	9.6965	9.87948	9.75831	10.372	10.8781	10.6303	10.1065	10.2694	10.4292	9.80488	10.4513	-0.624355	0.0220237	0.646379	0.00069324	0.896715	0.00307274	3.15912	0.0473457	2.51247	5	5	5
Tmem87b	Transmembrane protein 87B	9.47226	9.59789	8.83578	8.82065	8.97451	8.44616	8.1702	7.97055	7.82749	7.73647	8.42568	7.8028	8.08431	7.88057	8.08347	9.14022	8.03017	8.05537	-1.11005	-1.08485	0.025194	0.00069746	0.000566492	0.883702	3.15648	3.24681	0.0536943	5	5	5
Man1c1	alpha-1,2-Mannosidase	5.16479		5.11361	4.77981	5.1629	5.85326	6.35852	6.86235	7.00652	6.32646	5.05697	4.79987	5.00006	5.4536	5.67388	5.05528	6.48142	5.19688	1.42614	0.141597	-1.28454	0.000699439	0.498486	0.00116554	3.15525	0.302347	2.93347	4	5	5
Rps14	Small ribosomal subunit protein uS11	11.4723	11.8325	11.9509	12.0787	11.6582	11.0626	10.9341	11.13	11.3564	11.161	11.619	11.629	11.5696	11.9557	12.2892	11.7985	11.1288	11.8125	-0.669689	0.0139912	0.68368	0.000764112	0.937955	0.00215164	3.11684	0.0278181	2.66723	5	5	5
Marchf5	E3 ubiquitin-protein ligase MARCHF5	5.75209		6.43943	6.09957	6.58969	7.04623	7.28197	7.53602	7.19693	7.42715	6.8055	7.23989	7.30911	7.0005	7.1708	6.22019	7.29766	7.10516	1.07747	0.884963	-0.192504	0.000773442	0.00257118	0.161819	3.11157	2.58987	0.790971	4	5	5
Ttyh2	Protein tweety homolog 2	7.32252		7.15659	7.20052	7.20503	7.49899	7.62508	7.62834	7.72133	7.44467	7.54777	7.76027	7.51581	7.81727	7.95204	7.22117	7.58368	7.71863	0.362517	0.497468	0.13495	0.000783141	0.00149229	0.198632	3.10616	2.82615	0.701951	4	5	5
Cadm2	Cell adhesion molecule 2	10.1199	10.1894	10.0777	10.4312	10.4223	10.6372	10.9043	10.9549	10.9488	10.6108	10.1977	10.2893	10.3052	10.6467	10.5855	10.2481	10.8112	10.4049	0.563118	0.156798	-0.40632	0.000789238	0.214218	0.00858467	3.10279	0.669143	2.06628	5	5	5
Manea	Glycoprotein endo-alpha-1,2-mannosidase	8.21657		7.98264	7.61792	7.78183	8.66011	9.01985	8.93235	9.37628	8.70612	7.75326	7.87155	7.90271	8.2627	8.32978	7.89974	8.93894	8.024	1.0392	0.12426	-0.914942	0.000792499	0.494402	0.000710991	3.101	0.30592	3.14814	4	5	5
Yif1a	Protein YIF1A	7.07469	7.22008	6.90539	6.97664	6.85228	6.02373			6.45999	6.18304	6.30818	6.77878	6.57174	7.79195	8.29645	7.00582	6.22226	7.14942	-0.783561	0.143603	0.927164	0.000847141	0.720093	0.122967	3.07204	0.142612	0.910212	5	3	5
Nsdhl	Sterol-4-alpha-carboxylate 3-dehydrogenase, decarboxylating	7.4631		7.95454	7.97102	7.96166	8.60373	9.01313	8.77977	8.46644	8.59264	8.15775	8.3178	8.67807	8.72994	8.92818	7.83758	8.69114	8.56235	0.853562	0.724768	-0.128794	0.000850046	0.0073167	0.470476	3.07056	2.13568	0.327462	4	5	5
Cspg5	Chondroitin sulfate proteoglycan 5	7.37534	7.25441	7.39968	7.71156	7.6223	8.06342	8.81203	8.98342	8.65512	8.11713	8.41484	7.68073	8.4172	8.69124	9.07998	7.47266	8.52622	8.4568	1.05357	0.984142	-0.0694266	0.00085379	0.00377123	0.819717	3.06865	2.42352	0.0863362	5	5	5
Rhob	Rho-related GTP-binding protein RhoB	9.05583	9.40804	9.39328	9.4489	9.22643	9.57593	9.86404	9.90914	9.84042	9.7613	9.461	9.64885	9.17803	10.0182	10.0593	9.3065	9.79017	9.67307	0.483671	0.366576	-0.117095	0.000871624	0.0794738	0.527231	3.05967	1.09978	0.277999	5	5	5
Man2a1	Alpha-mannosidase 2	6.6285		5.99535	5.83776	6.36184	7.20705	7.25445	6.99277	7.63594	7.48433	6.56379	6.44358	6.35059	6.93095	6.93172	6.20586	7.31491	6.64413	1.10904	0.438261	-0.670781	0.000911171	0.0743923	0.00368446	3.0404	1.12847	2.43363	4	5	5
Hspd1	60 kDa heat shock protein, mitochondrial	8.44477	9.3689	8.39417	8.52568	8.66834	9.39343	9.74779	9.87571	9.63136	9.73599	8.97729	9.03008	8.60003	8.51732	8.5359	8.68037	9.67686	8.73213	0.996483	0.0517527	-0.944731	0.000939457	0.812019	0.000132213	3.02712	0.090434	3.87873	5	5	5
Acta1	Actin, alpha skeletal muscle	9.65581	9.55476	9.76222	9.49422	9.29905	10.0232	9.98554	10.0618	9.91644	9.90854	10.1136	9.98741	10.3965	9.14309	9.03871	9.55321	9.97911	9.73587	0.425902	0.182654	-0.243248	0.000941378	0.536761	0.399971	3.02624	0.270219	0.397971	5	5	5
Sez6l	Seizure 6-like protein	10.1552	10.1989	9.68365	10.0095	9.94866	9.40198	9.44901	9.63879	9.51979	9.41504	9.69125	9.12534	9.65168	10.0275	10.2436	9.99919	9.48492	9.74788	-0.514267	-0.25131	0.262957	0.000945065	0.267779	0.214815	3.02454	0.572223	0.667935	5	5	5
Tpi1	Triosephosphate isomerase	9.85722	10.0633	9.99793	10.5943	9.95914	10.6151	11.1086	10.7843	10.8402	10.9231	10.2892	10.2657	10.1043	10.4767	10.754	10.0944	10.8543	10.378	0.759892	0.283581	-0.476311	0.00108475	0.134786	0.00852283	2.96467	0.870355	2.06942	5	5	5
Nap1l5	Nucleosome assembly protein 1-like 5	4.75577		5.49759	5.84064	5.5297	6.9254	7.08357	7.09198	7.73194	6.43778	5.88065	6.18073	5.7159	6.52085	7.10583	5.40593	7.05413	6.28079	1.64821	0.874865	-0.773342	0.00110032	0.0393456	0.0435328	2.95848	1.4051	1.36118	4	5	5
Tmem14c	Transmembrane protein 14C	5.93857		6.36826	6.13819	6.30749	6.61411	7.36779	7.0465	7.11055	7.1663	6.9609	7.52909	7.32312	8.09194	8.41952	6.18813	7.06105	7.66492	0.87292	1.47679	0.603866	0.00110112	0.00204756	0.0714258	2.95816	2.68876	1.14614	4	5	5
Acat2	Acetyl-CoA acetyltransferase, cytosolic	7.30004	7.11887	6.87983	7.47534	7.00547	7.92803	7.69241	7.67157	8.27528	8.08309	7.88048	7.63719	7.77291	7.44773	7.98194	7.15591	7.93008	7.74405	0.774166	0.588138	-0.186027	0.00111895	0.00313216	0.245743	2.95119	2.50416	0.609518	5	5	5
Cntnap1	Contactin-associated protein 1	11.5038	11.4733	11.4375	11.5297	11.6202	11.8189	11.9734	11.8988	11.7725	11.6528	11.5773	11.4673	11.6915	11.8571	11.8841	11.5129	11.8233	11.6955	0.310375	0.182564	-0.127811	0.00113949	0.0657818	0.223544	2.94329	1.18189	0.650637	5	5	5
Snd1	Staphylococcal nuclease domain-containing protein 1	9.36952	9.69072	9.16692	8.92554	9.1779	8.6936	8.45752	8.47613	8.5508	8.72718	8.70268	9.19691	8.92416	8.25898	8.46924	9.26612	8.58105	8.71039	-0.685074	-0.555728	0.129346	0.00114575	0.0285355	0.478546	2.94091	1.54461	0.320076	5	5	5
Stim1	Stromal interaction molecule 1	9.20109	8.98283	8.99418	8.79495	9.1719	9.29601	9.49922	9.63935	9.73624	9.53437	9.21528	9.32916	9.45981	9.7236	9.94875	9.02899	9.54104	9.53532	0.512048	0.506331	-0.00571751	0.00118293	0.0105393	0.971058	2.92704	1.97719	0.012755	5	5	5
Abat	4-aminobutyrate aminotransferase, mitochondrial	7.38966	8.1482	7.32349	7.48235	7.37393	8.21555	8.6678	8.4424	8.32981	8.27346	7.59747	7.68918	7.53145	7.68337	7.94661	7.54353	8.3858	7.68962	0.842278	0.146091	-0.696187	0.00123644	0.411965	0.000181508	2.90783	0.38514	3.74111	5	5	5
Seh1l	Nucleoporin SEH1	6.27843		6.6654	6.65363	6.41025		7.28792	7.11723	7.00021	7.14336	7.09706	7.30301	7.17477	6.70636	7.2992	6.50193	7.13718	7.11608	0.635255	0.614155	-0.0211007	0.00128143	0.00454634	0.879908	2.8923	2.34234	0.0555625	4	4	5
Gpi	Glucose-6-phosphate isomerase	8.81393	9.39891	8.87766	9.49443	8.85383	9.64396	10.126	9.80968	9.95759	9.99389	9.20191	9.28731	9.26033	9.52036	10.0732	9.08775	9.90623	9.46862	0.818476	0.380874	-0.437602	0.00129394	0.118945	0.0416548	2.88808	0.924652	1.38033	5	5	5
Eef1akmt4-Ece2	EEF1AKMT4-ECE2 readthrough transcript protein	5.19217		5.04281	5.19801	5.47465	5.97734	5.59549	6.18089	6.25633	6.08168	5.24953	5.65214	5.58484	6.15113	6.51707	5.22691	6.01835	5.83094	0.791435	0.604026	-0.187409	0.00129847	0.0574582	0.478561	2.88657	1.24065	0.320062	4	5	5
Syn1	Synapsin-1	8.8481	9.48373	9.22474	9.57569	9.07218	9.65775	10.4708	10.1464	10.2412	10.3421	9.20932	9.43963	9.27191	9.19176	9.47306	9.24089	10.1716	9.31714	0.930745	0.076247	-0.854498	0.00130181	0.614201	0.000479083	2.88545	0.21169	3.31959	5	5	5
Ighm	Immunoglobulin heavy constant mu	8.47344	8.53268	8.07705	7.59683	8.32096	5.84029	6.84298	7.00175	5.09034	6.63956	6.75734	7.47729	5.55146	6.92763	6.73279	8.20019	6.28298	6.6893	-1.91721	-1.51089	0.406317	0.00130917	0.00289696	0.419283	2.883	2.53806	0.377493	5	5	5
Tomm20	Mitochondrial import receptor subunit TOM20 homolog	7.94848		8.18448	7.78106	8.19684	8.45194	8.85742	8.93356	8.57749	8.86182	8.46509	8.97092	8.64217	8.87263	9.06349	8.02772	8.73644	8.80286	0.708729	0.775144	0.0664152	0.0013383	0.00142061	0.65755	2.87345	2.84753	0.182071	4	5	5
Ggt5	Glutathione hydrolase 5 proenzyme	7.06354		7.07569	6.62842	6.62039	4.77205				3.97565				5.29526	5.64119	6.84701	4.37385	5.46823	-2.47316	-1.37878	1.09438	0.00135235	0.00330814	0.127874	2.86891	2.48042	0.893217	4	2	2
Mpc2	Mitochondrial pyruvate carrier 2	8.38036	7.77492	8.27771	7.75697	8.63436	8.87617	10.0158	9.97466	9.25668	9.38303	8.57986	9.18094	8.95813	8.82798	8.81947	8.16486	9.50128	8.87327	1.33641	0.70841	-0.628002	0.0013586	0.00737596	0.0305021	2.86691	2.13218	1.51567	5	5	5
Arf4	ADP-ribosylation factor 4	11.2852	11.9167	11.0289	10.6998	11.1423	10.5477	9.95092	9.69615	9.25863	9.53737	10.3367	9.92761	9.87559	8.81816	8.41564	11.2146	9.79816	9.47475	-1.4164	-1.73981	-0.323408	0.00139367	0.00307816	0.468741	2.85584	2.51171	0.329068	5	5	5
Fundc2	FUN14 domain-containing protein 2	7.3303		7.64153	7.32373	7.73582	7.98811	8.43545	8.53053	8.08716	8.288	7.59918	8.02984	7.76651	8.10017	8.06107	7.50784	8.26585	7.91135	0.758006	0.403509	-0.354497	0.00139959	0.0269785	0.0363661	2.854	1.56898	1.4393	4	5	5
Endod1	Endonuclease domain-containing 1 protein	11.4647	11.3404	11.756	11.496	11.4218	11.8539	11.7659	11.934	12.0766	12.0849	11.6292	11.62	11.6713	11.9357	11.7227	11.4958	11.9431	11.7158	0.447291	0.219991	-0.2273	0.0014044	0.041906	0.0281618	2.85251	1.37772	1.55034	5	5	5
Cct6a	T-complex protein 1 subunit zeta	8.6872	9.10796	8.69048	8.69844	8.78075	9.12281	9.34494	9.23208	9.28734	9.14494	8.62218	9.06008	8.69358	8.62809	9.02752	8.79296	9.22642	8.80629	0.433459	0.0133254	-0.420134	0.00140874	0.918909	0.00426776	2.85117	0.0367274	2.3698	5	5	5
Erc2	ERC protein 2	7.9134	8.55637	7.8956	8.21257	8.06303	7.29255	7.1674	7.78168	7.21083	7.24842	8.04255	7.62024	7.67892	7.55594	7.22236	8.12819	7.34018	7.624	-0.788018	-0.504191	0.283827	0.00141887	0.0224771	0.138869	2.84806	1.64826	0.857394	5	5	5
Atp6v1g2	V-type proton ATPase subunit G 2	11.996	12.5576	12.2152	11.9295	11.8042	11.6481	11.2993	11.362	11.2755	11.3985	11.949	11.4486	11.5884	11.7895	11.9086	12.1005	11.3967	11.7368	-0.70384	-0.36367	0.34017	0.00143983	0.0563857	0.019213	2.84169	1.24883	1.7164	5	5	5
Osbpl2	Oxysterol-binding protein-related protein 2	8.03717	7.61915	8.21938	8.37377	8.78271	7.1616	7.52341	7.00918	7.08234	6.66118	6.95971	6.69114	6.36239			8.20644	7.08754	6.67108	-1.1189	-1.53536	-0.416464	0.00147521	0.00167956	0.111817	2.83115	2.7748	0.951492	5	5	3
Rabggta	Geranylgeranyl transferase type-2 subunit alpha	6.78694		7.19875	7.48528	7.0424	7.72353	7.8595	8.17772	8.32702	8.30383	7.77687	7.9474	7.56886	7.52997	7.34933	7.12834	8.07832	7.63448	0.949976	0.506139	-0.443837	0.00149647	0.0227058	0.0240545	2.82493	1.64386	1.6188	4	5	5
Mdh1	Malate dehydrogenase, cytoplasmic	9.55007	9.75676	9.67389	10.5019	9.70586	10.5872	11.1918	10.7668	10.6939	10.6699	9.98621	9.71849	9.65703	9.88828	10.4916	9.83769	10.7819	9.94832	0.944233	0.110626	-0.833607	0.00150615	0.636159	0.00181616	2.82213	0.196434	2.74085	5	5	5
Hnrnpu	Heterogeneous nuclear ribonucleoprotein U	10.5032	10.589	10.492	10.0473	10.6695	9.9885	9.84013	9.95676	9.99584	9.86144	10.2271	10.6069	10.1484	9.68337	9.93024	10.4602	9.92853	10.1192	-0.531655	-0.340986	0.190669	0.00152492	0.107885	0.261103	2.81675	0.96704	0.583187	5	5	5
Ampd3	AMP deaminase 3	7.29338		7.58052	7.39866	7.42353	7.92661	7.64215	7.84369	7.93536	7.78457	7.83709	7.94089	7.76516	7.9938	8.12004	7.42402	7.82647	7.9314	0.402451	0.507373	0.104922	0.0015363	0.000651436	0.235817	2.81352	3.18613	0.627424	4	5	5
Cfap45	Cilia- and flagella-associated protein 45		4.26981	4.65339			6.25934	6.99347		6.84676	6.43558	6.49003	6.51983	6.52796		4.84196	4.4616	6.63379	6.09495	2.17219	1.63335	-0.538843	0.00155363	0.0625042	0.277922	2.80865	1.20409	0.556077	2	4	4
Gnptg	N-acetylglucosamine-1-phosphotransferase subunit gamma	5.11685		5.08793			6.68236	7.31234	6.51207	6.60598	6.44688	4.6485	6.2819		6.51834	7.75139	5.10239	6.71193	6.30003	1.60954	1.19765	-0.411892	0.00160704	0.278871	0.50571	2.79397	0.554596	0.296098	2	5	4
Rtn3	Reticulon-3	10.1797	9.40856	10.1246	9.737	9.86081	10.3805	11.0177	10.7569	10.6893	10.5587	10.1239	10.6209	10.5338	11.0349	11.0943	9.86214	10.6806	10.6816	0.81849	0.819431	0.000941705	0.00161234	0.00674833	0.99648	2.79254	2.1708	0.00153148	5	5	5
Snx27	Sorting nexin-27	9.24093	9.40684	9.92753	9.71934	10.3336	8.74535	8.4594	9.0023	8.81301	8.3476	8.55874	8.66544	8.53502	8.17077	10.0564	9.72565	8.67353	8.79728	-1.05212	-0.928373	0.123742	0.00168322	0.0398371	0.730481	2.77386	1.39971	0.136391	5	5	5
Sema4a	Semaphorin-4A	7.3126	7.46054	7.02269	7.27956	7.23757	7.6278	7.66923	7.655	7.54152	7.55717	7.48405	7.20368	7.48148	7.81792	7.64952	7.26259	7.61014	7.52733	0.347553	0.264738	-0.0828146	0.00172381	0.0655438	0.453936	2.76351	1.18347	0.343005	5	5	5
Sec14l1	SEC14-like protein 1	6.99918		6.93731	6.742	6.97495	6.68475	6.2932	6.11356	6.20814	6.19562	6.97366	7.32845	6.93268	6.81648	7.35284	6.91336	6.29905	7.08082	-0.614305	0.167464	0.781769	0.00172858	0.25187	0.000758971	2.76231	0.598824	3.11977	4	5	5
Ppp5c	Serine/threonine-protein phosphatase 5	7.14505		7.15609	7.57963	7.17931	7.771	8.33836	7.82603	7.98803	7.96702	7.50908	7.81646	7.53499	7.80167	8.3701	7.26502	7.97809	7.80646	0.713066	0.541441	-0.171625	0.00174109	0.0294006	0.377857	2.75918	1.53164	0.422672	4	5	5
Atp5mg	ATP synthase subunit g, mitochondrial	10.4741	10.2796	9.73951	9.43465	10.2233	10.7836	11.5153	11.9817	10.9637	11.6419	10.3096	10.9575	10.4167	10.714	10.2052	10.0302	11.3772	10.5206	1.34701	0.490392	-0.856623	0.00175136	0.0718487	0.0111245	2.75663	1.14358	1.95372	5	5	5
Dnpep	Aspartyl aminopeptidase	7.65271		7.47986	7.81398	7.61346	8.09006	8.38743	8.00406	8.09378	8.0336	7.68722	7.77665	7.51104	7.79772	7.96107	7.64	8.12178	7.74674	0.481783	0.106739	-0.375043	0.00176593	0.334909	0.00581246	2.75303	0.475074	2.23564	4	5	5
Prkg1	cGMP-dependent protein kinase 1	8.23286		8.27773	8.36407	7.55796	6.25679	7.14351	6.61756	7.10185	7.11066	8.10667	7.88744	7.59651	7.62649	8.25864	8.10815	6.84608	7.89515	-1.26208	-0.213007	1.04907	0.00177179	0.364569	0.00138321	2.75159	0.438221	2.85911	4	5	5
Rpsa	Small ribosomal subunit protein uS2	10.1999	10.8896	10.2169	10.159	9.92769	9.39017	9.39859	9.31143	9.65034	9.6234	10.3601	10.9867	10.5632	10.5867	10.7691	10.2786	9.47479	10.6531	-0.803823	0.374526	1.17835	0.00177831	0.0880786	1.36655e-05	2.74999	1.05513	4.86437	5	5	5
Sfxn3	Sideroflexin-3	10.848	10.9926	10.6863	10.1192	10.9471	11.3617	12.1314	12.3607	11.4722	11.9819	10.8506	11.4493	10.8917	11.4689	11.2248	10.7186	11.8616	11.1771	1.14292	0.458414	-0.684504	0.00178832	0.0573272	0.018839	2.74756	1.24164	1.72494	5	5	5
Hdgf	Hepatoma-derived growth factor	6.89008		6.85126	6.87847		7.54209	7.23326	7.3807	7.74621	7.50381	7.38929	7.55961	7.29675	7.69	8.15122	6.87327	7.48121	7.61737	0.607945	0.744106	0.136162	0.00179232	0.00980873	0.452423	2.74658	2.00839	0.344455	3	5	5
Pfdn5	Prefoldin subunit 5	7.09694		7.64046	7.67763	7.15352	8.05865	8.15465	7.92723	8.17349	8.21345	7.67624	7.79331	7.38799	7.64318	8.03612	7.39214	8.1055	7.70737	0.713358	0.315234	-0.398125	0.00190877	0.125171	0.00944574	2.71925	0.902496	2.02476	4	5	5
Gria3	Glutamate receptor 3	9.64209	9.84021	9.66279	9.8115	9.8925	9.1761	9.52347	9.4258	9.46407	9.13044	9.39335	9.49943	9.72954	9.93534	9.64625	9.76982	9.34398	9.64078	-0.425843	-0.129037	0.296806	0.00192082	0.258818	0.0424147	2.71651	0.587005	1.37248	5	5	5
Golt1b	Vesicle transport protein GOT1B	8.93678	8.52831	8.86854	8.4484	8.80619	8.06216	8.36457	8.20336	8.12695	7.79124	8.31625	8.68761	8.49648	8.98906	9.42374	8.71764	8.10966	8.78263	-0.607985	0.0649854	0.67297	0.00199544	0.773056	0.0145646	2.69996	0.111789	1.8367	5	5	5
Eml5	Echinoderm microtubule-associated protein-like 5	11.5031	11.0689	10.5029	10.2431	10.3585	12.6717	11.4201	12.0156	12.445	12.7319	13.8418	13.2154	13.9917	10.2308	10.2958	10.7353	12.2569	12.3151	1.52157	1.57982	0.0582548	0.00211838	0.110598	0.948972	2.674	0.956255	0.0227466	5	5	5
Got1	Aspartate aminotransferase, cytoplasmic	10.1623	10.4241	10.1129	10.8757	10.3368	11.0971	11.7451	11.2088	11.0887	10.9969	10.2279	9.79881	9.91896	10.1491	10.3492	10.3824	11.2273	10.0888	0.84495	-0.293571	-1.13852	0.00218305	0.120805	0.000138538	2.66094	0.917915	3.85843	5	5	5
Cadm3	Cell adhesion molecule 3	9.56965	10.3365	9.94221	10.1787	10.0486	10.4132	10.6236	10.9539	10.8455	10.7947	10.1572	10.0304	10.297	10.1539	9.76697	10.0151	10.7262	10.0811	0.71104	0.0659613	-0.645079	0.00218414	0.685718	0.00110663	2.66072	0.163855	2.956	5	5	5
Atl3	Atlastin-3	7.13948		7.32641	7.13629	7.06654	7.49899	7.40005	7.45394	7.60913	7.40806	7.3028	7.55761	7.64898	8.02879	8.10759	7.16718	7.47403	7.72915	0.306853	0.561973	0.255119	0.0022087	0.0156339	0.138122	2.65586	1.80593	0.859738	4	5	5
Anxa7	Annexin A7	9.79511	10.1787	9.52577	9.71249	9.90259	9.23733	9.49223	9.30727	9.15558	9.08691	9.59802	9.53128	9.36936	9.83047	10.0701	9.82294	9.25586	9.67985	-0.567075	-0.143084	0.423991	0.00227587	0.406907	0.0168925	2.64285	0.390505	1.77231	5	5	5
Cyb5r1	NADH-cytochrome b5 reductase 1	9.77009	9.07215	9.50378	8.82429	9.47882	9.98942	10.1683	10.5651	9.99784	10.4398	9.60245	10.0219	9.68785	9.85579	9.61837	9.32983	10.2321	9.75728	0.90227	0.427452	-0.474818	0.00227995	0.0511668	0.00995301	2.64207	1.29101	2.00205	5	5	5
Snrpf	Small nuclear ribonucleoprotein F	6.89082	7.74781	6.94447	6.83439	6.75038	6.0104	5.86373	4.66301	6.03948	5.69917	6.74244	7.07661	6.66832	6.5899	6.1949	7.03357	5.65516	6.65443	-1.37841	-0.37914	0.999275	0.00228401	0.138171	0.00905798	2.6413	0.859582	2.04297	5	5	5
Tbc1d10a	TBC1 domain family member 10A	7.50565		7.43909	7.25871	7.2507	6.80279			6.9502	6.89413	6.84493	6.94473	7.13509	6.73502	6.69451	7.36354	6.88237	6.87086	-0.481166	-0.492683	-0.0115167	0.00228764	0.00235997	0.920157	2.64061	2.62709	0.0361379	4	3	5
Calm1;Calm2;Calm3	Calmodulin-1;Calmodulin-2;Calmodulin-3	11.0823	11.6093	10.8874	11.1318	11.4839	10.5394	10.0616	10.5535	10.7546	10.0981	9.70027	10.1271	10.0897	10.2536	9.8603	11.2389	10.4014	10.0062	-0.837494	-1.23272	-0.395231	0.00234793	7.58985e-05	0.0476431	2.62931	4.11977	1.322	5	5	5
Ppa1	Inorganic pyrophosphatase	7.39841		7.2985	7.74834	7.42093	8.50788	8.61351	8.28265	8.06459	7.89782	7.25594	6.41679	6.8377	6.29699	7.89227	7.46654	8.27329	6.93994	0.806746	-0.526607	-1.33335	0.00236311	0.167431	0.00318765	2.62652	0.776164	2.49653	4	5	5
Fam98a	Protein FAM98A	6.92191		7.29793	7.13047	7.05706	6.53976	6.57926	6.01851	6.65313	6.29935	7.01164	7.75138	7.50505	6.85148	7.27443	7.10184	6.418	7.27879	-0.683843	0.17695	0.860793	0.00247727	0.398343	0.00258577	2.60603	0.399743	2.58741	4	5	5
Slc25a27	Solute carrier family 25, member 27	6.19221	7.65252	6.79312	6.55741	7.2546	7.81941	8.32179	8.38791	7.88475	8.11499	7.25365	7.53988	7.21529	7.4151	7.3981	6.88997	8.10577	7.3644	1.2158	0.474431	-0.741368	0.00251984	0.109648	0.000402856	2.59863	0.960001	3.39485	5	5	5
Ndufs5	NADH dehydrogenase [ubiquinone] iron-sulfur protein 5	10.7816	10.633	10.6601	10.1172	10.7516	10.9547	11.5512	11.6893	11.1736	11.4608	10.6905	11.1674	10.9901	10.6645	10.8195	10.5887	11.3659	10.8664	0.777212	0.277675	-0.499536	0.00254377	0.108609	0.0156374	2.59452	0.964134	1.80584	5	5	5
Pdxk	Pyridoxal kinase	7.83742		7.87829	8.41495	7.76638	8.44233	8.65226	8.63933	8.66033	8.64307	8.2322	8.21937	8.21838	8.30737	8.55221	7.97426	8.60746	8.3059	0.633204	0.331645	-0.301559	0.00259946	0.061717	0.00413939	2.58512	1.2096	2.38306	4	5	5
Gnb2	Guanine nucleotide-binding protein G(I)/G(S)/G(T) subunit beta-2	13.4622	13.0807	13.5605	13.5156	13.6412	13.8116	13.9564	13.9752	13.9108	13.8218	13.6471	13.5109	13.6095	13.7954	13.8661	13.4521	13.8952	13.6858	0.443116	0.23376	-0.209356	0.0026145	0.0799762	0.020313	2.58261	1.09704	1.69223	5	5	5
Myl12b	Myosin regulatory light chain 12B	11.7579	12.4609	11.6021	11.5535	11.4354	11.2367	10.8096	10.906	10.775	10.6608	11.7082	11.0252	11.5064	11.6124	11.6148	11.762	10.8776	11.4934	-0.884352	-0.268578	0.615774	0.00270799	0.254784	0.00424377	2.56735	0.593828	2.37225	5	5	5
Ndufc2	NADH dehydrogenase [ubiquinone] 1 subunit C2	9.14705	8.44955	9.1798	8.58104	9.22274	9.32473	10.0267	9.93848	9.78972	10.1019	9.22245	9.93295	9.61119	9.83703	9.99037	8.91604	9.83632	9.7188	0.920285	0.802763	-0.117521	0.00271542	0.00599008	0.566438	2.56616	2.22257	0.246848	5	5	5
Pc	Pyruvate carboxylase, mitochondrial	7.84973	8.23315	7.7678	7.41615	7.8073	8.43321	8.36896	8.48388	8.29524	8.341	7.60074	7.90737	7.36263	7.36542	7.43389	7.81483	8.38446	7.53401	0.569629	-0.280819	-0.850447	0.00281024	0.128561	4.94804e-05	2.55126	0.890892	4.30557	5	5	5
Hspa5	Endoplasmic reticulum chaperone BiP	7.99831	8.77769	7.9259	7.82945	8.18326	8.73423	9.40463	9.43931	9.50987	8.76138	8.03071	8.01261	8.11079	8.42215	8.56239	8.14292	9.16988	8.22773	1.02696	0.0848064	-0.942154	0.00282008	0.686253	0.00181601	2.54974	0.163516	2.74088	5	5	5
Rps15	Small ribosomal subunit protein uS19	7.99498	7.91245	7.96415	8.06759	7.88592	8.30175	8.0535	8.51662	8.3123	8.4229	8.31294	8.68558	8.25157	8.39904	8.51806	7.96502	8.32141	8.43344	0.356398	0.468422	0.112024	0.00282501	0.000510536	0.336569	2.54898	3.29197	0.472926	5	5	5
Septin2	Septin-2	7.58347	7.69574	7.82628	7.60789	7.77949	8.20194	8.11344	7.79621	8.2208	8.06288	7.69733	8.03428	7.6871	7.77105	8.03745	7.69857	8.07905	7.84544	0.380481	0.146869	-0.233612	0.00283348	0.149198	0.0663047	2.54768	0.826236	1.17846	5	5	5
Smap1	Stromal membrane-associated protein 1	7.47215	7.64039	7.79006	7.62001	7.71189	7.88706	7.91631	7.81585	7.92481	8.03227	7.69812	8.12563	7.87664	7.5623	7.79785	7.6469	7.91526	7.81211	0.268361	0.165208	-0.103153	0.00287477	0.16526	0.335317	2.5414	0.781832	0.474544	5	5	5
Slc25a5	ADP/ATP translocase 2	12.3661	11.9243	12.0837	11.52	12.2233	12.5813	13.5337	13.4701	12.7595	12.8801	12.0578	12.6124	12.231	12.4488	12.3429	12.0235	13.045	12.3386	1.02146	0.315071	-0.706394	0.00288606	0.106882	0.0109898	2.53969	0.971095	1.95901	5	5	5
Smpd2	Sphingomyelin phosphodiesterase 2	7.13388		6.87177	6.53228	6.66528	7.20274	7.35902	7.40211	7.51265	7.395	7.13729	7.73231	7.58176	8.16588	8.69839	6.8008	7.3743	7.86313	0.573501	1.06233	0.488824	0.00291292	0.0132477	0.10827	2.53567	1.87786	0.96549	4	5	5
Rps6ka5	Ribosomal protein S6 kinase alpha-5	7.55034		7.45427	7.26863	7.50407	7.98628	8.13257	7.63303	8.09641	8.21381	8.12067	8.619	8.34136	7.50192	8.31516	7.44433	8.01242	8.17962	0.568096	0.735294	0.167199	0.00293803	0.0121274	0.454996	2.53194	1.91623	0.341992	4	5	5
Trappc2l	Trafficking protein particle complex subunit 2-like protein	8.23571		8.25066	7.89021	8.48044	7.85479	7.61379	7.38259	7.4027	7.25424	7.89524	7.67514	7.53984	7.23147	6.96267	8.21425	7.50162	7.46087	-0.712632	-0.753383	-0.0407509	0.00299522	0.00994582	0.840061	2.52357	2.00236	0.0756891	4	5	5
Timm9	Mitochondrial import inner membrane translocase subunit Tim9	7.19307	6.99316	6.8726	6.42628	7.57191	7.57108	8.17963	8.78565	7.95581	8.38627	7.42752	7.58862	6.94672	7.10397	6.92134	7.0114	8.17569	7.19764	1.16429	0.186232	-0.978053	0.00301066	0.442545	0.00384325	2.52134	0.354042	2.4153	5	5	5
Naa15	N-alpha-acetyltransferase 15, NatA auxiliary subunit	9.42083		9.07361	8.91688	9.31787	8.56207	8.87835	8.55932	8.62969	8.60283	8.81542	9.50569	8.80595	8.63887	8.43413	9.1823	8.64645	8.84001	-0.535846	-0.342284	0.193561	0.00306635	0.176748	0.337753	2.51338	0.752647	0.4714	4	5	5
Lrpap1	Alpha-2-macroglobulin receptor-associated protein	8.08262	7.80167	7.94497	8.03902	7.7118	8.14133	8.38056	8.81821	8.66449	8.42884	7.75608	7.92154	8.16591	8.37284	8.65008	7.91602	8.48669	8.17329	0.570671	0.257275	-0.313396	0.00310639	0.176749	0.151196	2.50774	0.752643	0.820459	5	5	5
Ncam1	Neural cell adhesion molecule 1	12.3471	12.2728	12.5928	12.892	12.4738	12.9358	12.8909	13.1594	12.9989	13.0774	12.8993	12.4126	12.7783	12.7579	12.5938	12.5157	13.0125	12.6884	0.496806	0.17271	-0.324096	0.00310644	0.245111	0.0103348	2.50774	0.610638	1.9857	5	5	5
Clvs1	Clavesin-1	9.88207	10.483	9.88333	9.60656	9.70292	9.41292	8.86694	8.98547	9.24498	9.25408	9.83676	10.0896	9.97653	9.3018	9.25315	9.91158	9.15288	9.69158	-0.758698	-0.220001	0.538697	0.0031065	0.3693	0.0274204	2.50773	0.43262	1.56193	5	5	5
Sccpdh	Saccharopine dehydrogenase-like oxidoreductase	11.2124	11.2515	10.8639	10.633	11.1388	11.5932	11.7483	11.9277	11.3425	11.6293	11.1842	11.1501	11.0154	11.3132	11.4032	11.0199	11.6482	11.2132	0.628297	0.193301	-0.434995	0.00331802	0.192446	0.00596285	2.47912	0.715691	2.22455	5	5	5
Slc25a13	Electrogenic aspartate/glutamate antiporter SLC25A13, mitochondrial	7.05872		7.02462	6.49828	6.44442	7.29427	7.51519	7.52016	7.33556	7.46214	6.83522	7.38074	6.86458	6.65413	6.80569	6.75651	7.42546	6.90807	0.668954	0.151562	-0.517392	0.00342993	0.476909	0.00444736	2.46471	0.321564	2.3519	4	5	5
Pds5b	Sister chromatid cohesion protein PDS5 homolog B	7.0458	7.72398	6.97488	6.59199	6.84127	6.32669	5.73695	6.13251	6.16907	6.34375	6.50323	6.79514	6.65715	6.06385	6.53404	7.03559	6.14179	6.51068	-0.893793	-0.524905	0.368889	0.00345249	0.0481451	0.0554124	2.46187	1.31745	1.25639	5	5	5
Vat1l	Synaptic vesicle membrane protein VAT-1 homolog-like	7.18817		6.80988	6.96336	7.10264	7.59065	8.07962	7.62949	7.41822	7.54146	7.08974	7.20923	7.16072	7.37732	7.61323	7.01601	7.65189	7.29005	0.635873	0.274034	-0.361839	0.0034633	0.0708306	0.0387507	2.46051	1.14978	1.41172	4	5	5
Atp6v1a	V-type proton ATPase catalytic subunit A	13.9146	14.2606	14.2427	13.9651	13.8873	13.765	13.4974	13.5977	13.6627	13.773	14.1484	13.8966	14.1115	14.3556	14.4378	14.054	13.6592	14.19	-0.394871	0.135949	0.53082	0.00354418	0.311114	0.00122843	2.45048	0.50708	2.91065	5	5	5
Aifm1	Apoptosis-inducing factor 1, mitochondrial	7.06096		6.79888	6.31257	6.78093	7.37137	7.49964	8.03633	7.43601	7.49181	6.43553	6.86695	6.54014	6.63296	6.51291	6.73834	7.56703	6.5977	0.828694	-0.140637	-0.969331	0.00355007	0.410325	0.000126425	2.44976	0.386872	3.89817	4	5	5
Reep5	Receptor expression-enhancing protein 5	8.34226	8.52893	8.56501	7.9416	8.27544	8.66729	8.77835	8.98705	9.1332	8.87258	8.42041	8.63572	8.30764	8.69369	8.91087	8.33065	8.88769	8.59367	0.557044	0.263017	-0.294028	0.00372086	0.125583	0.0583951	2.42936	0.901069	1.23362	5	5	5
Itpka	Inositol-trisphosphate 3-kinase A	10.4369	11.3395	10.3037	9.90616	10.3253	9.30145	9.35687	8.84533	9.69821	9.52266	9.71183	10.2929	9.99195	9.49947	9.57301	10.4623	9.3449	9.81384	-1.11743	-0.648493	0.468935	0.00374503	0.0483087	0.0510318	2.42654	1.31597	1.29216	5	5	5
Dlgap4	Disks large-associated protein 4	5.3542		6.41535	3.88135		7.92612	7.55603	7.82043	7.70587	7.54664	7.90102	7.91955	7.78885			5.21696	7.71102	7.8698	2.49405	2.65284	0.158787	0.0038035	0.022654	0.174038	2.41982	1.64486	0.759355	3	5	3
Bcap29	B-cell receptor-associated protein 29	7.96368		7.93979	7.72171	7.72988	8.04338	8.32329	8.18755	8.42682	8.19897	8.19252	8.12835	8.17167	8.62622	8.85682	7.83877	8.236	8.39512	0.397236	0.556352	0.159116	0.00381703	0.015776	0.349813	2.41827	1.802	0.456164	4	5	5
Ugt8	2-hydroxyacylsphingosine 1-beta-galactosyltransferase	6.71041		6.52601	6.66074	6.98707	7.30187	7.64142	7.33801	7.53475	6.99746	6.89242	7.1721	7.2398	7.25963	7.3169	6.72106	7.3627	7.17617	0.641643	0.455111	-0.186533	0.00387757	0.00677312	0.19982	2.41144	2.16921	0.699362	4	5	5
Dctn2	Dynactin subunit 2	8.10882	8.6912	8.08547	8.57641	8.06885	8.8546	8.97529	8.8066	8.97182	8.76545	8.3217	8.10192	7.97266	8.2715	8.62778	8.30615	8.87475	8.25911	0.568601	-0.0470384	-0.61564	0.00388567	0.79481	0.000850061	2.41053	0.0997366	3.07055	5	5	5
Mag	Myelin-associated glycoprotein	10.2088	10.1279	10.067	10.5779	10.1751	10.8419	10.9824	10.4726	11.0749	10.6389	10.1812	10.5552	10.3357	11.0225	11.0725	10.2314	10.8021	10.6334	0.570773	0.40206	-0.168713	0.00389523	0.0800021	0.446233	2.40947	1.0969	0.350438	5	5	5
Diras2	GTP-binding protein Di-Ras2	10.3545	10.8013	10.5454	10.2921	10.4638	10.139	10.1604	10.0451	9.94257	10.181	10.2815	10.4446	10.3012	9.99879	9.34733	10.4914	10.0936	10.0747	-0.397788	-0.416744	-0.018956	0.00393257	0.0884747	0.927047	2.40532	1.05318	0.0328984	5	5	5
Rad23b	UV excision repair protein RAD23 homolog B	4.21851		4.89397	6.03109	4.84478	6.59429	7.10502	7.00174	8.81099	7.03533	5.69223	6.08564	5.09337	5.93182	7.20695	4.99708	7.30947	6.002	2.31239	1.00492	-1.30747	0.00397234	0.0909929	0.0355379	2.40095	1.04099	1.44931	4	5	5
Efhd2	EF-hand domain-containing protein D2	7.44906		7.38341	7.85508	7.70298	7.99699	8.30269	8.24343	8.71383	8.19767	7.74749	7.74767	7.73615	8.03586	7.98995	7.59763	8.29092	7.85142	0.693291	0.253793	-0.439498	0.00398163	0.0770007	0.0115966	2.39994	1.11351	1.93567	4	5	5
Ppp1ca	Serine/threonine-protein phosphatase PP1-alpha catalytic subunit	9.02413	8.98249	9.22542	8.7754	9.04653	8.71187	7.88382	8.14088	8.45666	8.55582	8.68069	8.65855	8.67555	8.27098	8.48253	9.0108	8.34981	8.55366	-0.660983	-0.457134	0.203849	0.00401787	0.00277508	0.262771	2.396	2.55672	0.580422	5	5	5
Ehd2	EH domain-containing protein 2	8.08802	8.26519	7.36496	7.37596	7.351	7.04005	6.84855	6.003	6.5458	6.68439	6.98119	7.3791	7.30113	7.12837	7.47417	7.68902	6.62436	7.25279	-1.06467	-0.436232	0.628435	0.00403174	0.0822864	0.0127747	2.39451	1.08467	1.89365	5	5	5
Cpsf7	Cleavage and polyadenylation specificity factor subunit 7	8.25554	7.51235	7.76043	7.69446	8.05118	7.2988	6.51979	6.58636	7.30647	7.18171	7.58273	7.96375	7.51984	7.59042	7.26539	7.85479	6.97863	7.58443	-0.876163	-0.270367	0.605795	0.00403186	0.157435	0.019527	2.39449	0.802897	1.70936	5	5	5
Clic6	Chloride intracellular channel protein 6	6.88726	6.47361	7.10839	6.81862	7.27929	7.58149	7.29115	7.49117	7.89908	7.87237	5.71716	6.44978	5.25132	6.45708	6.20589	6.91344	7.62705	6.01625	0.713616	-0.897189	-1.61081	0.00405376	0.0106694	0.000266218	2.39214	1.97186	3.57476	5	5	5
Eif2s3x	Eukaryotic translation initiation factor 2 subunit 3, X-linked	7.45576	7.26728	7.77339	7.5632	7.64015	7.84021	7.92639	7.82372	7.96718	7.93386	7.55364	7.87032	7.6705	7.49887	7.80794	7.53996	7.89827	7.68025	0.358314	0.140295	-0.218019	0.00407154	0.243191	0.0215396	2.39024	0.614053	1.66676	5	5	5
Ranbp1	Ran-specific GTPase-activating protein	6.78209		6.95564	7.30417	7.22906	7.3765	7.87171	7.60996	7.90097	7.83279	7.21775	7.29824	7.15203	7.44716	7.89045	7.06774	7.71839	7.40113	0.650648	0.333388	-0.31726	0.00407347	0.112119	0.0911905	2.39003	0.950323	1.04005	4	5	5
Pafah1b1	Platelet-activating factor acetylhydrolase IB subunit beta	8.35563	8.23865	8.39067	8.88165	8.53329	9.01759	9.25256	8.89995	8.98315	8.8477	8.7447	8.46621	8.40785	8.55969	8.92796	8.47998	9.00019	8.62128	0.520213	0.141307	-0.378907	0.00412007	0.362643	0.0125964	2.3851	0.44052	1.89975	5	5	5
Cpe	Carboxypeptidase E	8.31208	8.67784	8.46355	8.26292	8.30593	8.66573	8.78198	8.65163	8.91355	8.95922	8.5307	8.68355	8.31027	9.06349	9.47325	8.40446	8.79442	8.81225	0.389962	0.407788	0.0178264	0.00423787	0.10038	0.93602	2.37285	0.998351	0.0287148	5	5	5
Uqcr11	Cytochrome b-c1 complex subunit 10	9.12178		8.81399	8.38256	8.95891	9.32898	10.299	10.2587	9.56997	9.98964	9.24124	9.67396	9.00761	9.44903	9.16836	8.81931	9.88925	9.30804	1.06994	0.488732	-0.581207	0.00427409	0.0378994	0.031545	2.36916	1.42137	1.50107	4	5	5
Ank2	Ankyrin-2	10.3562	11.0002	10.5087	10.2959	10.5607	10.0264	10.0233	9.86483	10.1202	10.0939	10.3836	10.7616	10.5034	10.2461	10.354	10.5443	10.0257	10.4497	-0.51862	-0.0946223	0.423998	0.00427571	0.550744	0.00262307	2.36899	0.25905	2.58119	5	5	5
Amph	Amphiphysin	9.29617	9.81673	9.51727	9.73578	9.72148	9.78804	10.311	10.1641	10.2667	10.1499	9.60591	9.95614	9.66851	9.54902	9.8929	9.61749	10.136	9.7345	0.51847	0.117009	-0.40146	0.00433818	0.37282	0.0111559	2.36269	0.4285	1.95249	5	5	5
Psma7	Proteasome subunit alpha type-7	8.05122	7.91633	7.8336	8.1001	8.34364	8.68118	9.38104	8.64682	8.61993	8.47783	8.0035	8.00197	7.71438	8.11306	8.3166	8.04897	8.76136	8.0299	0.712388	-0.0190735	-0.731461	0.00436039	0.887896	0.00437851	2.36047	0.0516381	2.35867	5	5	5
	Uncharacterized protein C2orf72 homolog	8.65126		8.72557	8.50879	8.61213	8.96509	8.97192	9.24528	8.95081	8.81363	8.73979			8.17517	8.3393	8.62444	8.98934	8.41809	0.364906	-0.206351	-0.571258	0.00457397	0.227689	0.0100303	2.33971	0.642658	1.99869	4	5	3
Lpcat1	Lysophosphatidylcholine acyltransferase 1	8.72688	8.89717	8.72071	8.36799	8.33702	9.00376	8.91792	9.23604	9.33393	9.15454	8.90247	9.03845	9.29592	9.6313	9.92018	8.60995	9.12924	9.35766	0.519285	0.747709	0.228424	0.00458829	0.00884286	0.291575	2.33835	2.05341	0.53525	5	5	5
Rps27l	Small ribosomal subunit protein eS27-like	9.93452	10.0937	10.0187	9.82048	9.72042	9.4946	9.2412	9.73826	9.55789	9.53213	10.1589	10.2524	10.2021	10.2162	10.6017	9.91756	9.51282	10.2862	-0.404741	0.368685	0.773426	0.00464743	0.00778281	0.000133251	2.33279	2.10886	3.87533	5	5	5
Letm1	Mitochondrial proton/calcium exchanger protein	8.64867	8.64235	8.22143	7.93824	8.5073	8.85677	9.22844	9.49738	8.91002	8.98123	8.33675	8.48396	8.22786	8.4383	8.28386	8.3916	9.09477	8.35415	0.703171	-0.0374496	-0.740621	0.00474504	0.803051	0.000416101	2.32376	0.0952568	3.3808	5	5	5
Uchl1	Ubiquitin carboxyl-terminal hydrolase isozyme L1	10.2727	9.81783	10.576	10.8596	10.6472	10.9735	11.4517	11.3539	11.0953	11.1639	10.7669	10.8865	10.7002	10.7002	10.8449	10.4347	11.2077	10.7797	0.772992	0.345032	-0.42796	0.00482041	0.0984111	0.00193324	2.31692	1.00696	2.71371	5	5	5
Mfsd10	Major facilitator superfamily domain-containing protein 10	7.01401		6.79698	6.93934	6.78613	7.00986	7.54981	7.53769	7.73204	7.56229	7.49982	7.53227	8.00913	8.22516	8.76069	6.88411	7.47834	8.00541	0.594223	1.1213	0.527076	0.00493648	0.00429245	0.081297	2.30658	2.36729	1.08993	4	5	5
Csnk1g3	Casein kinase I isoform gamma-3	8.01959		8.33685	8.33485	8.23256	8.50618	8.4695	8.48312	8.64333	8.56152	8.36521	8.69218	8.5498	8.54349	8.81913	8.23096	8.53273	8.59396	0.301766	0.362998	0.0612322	0.00495047	0.0124379	0.481162	2.30535	1.90525	0.317709	4	5	5
Rab22a	Ras-related protein Rab-22A	6.60987		6.96363	7.08582	6.7857	7.43436	7.43664	7.11102	7.42888	7.261	7.54495	7.69251	7.71462	7.45817	7.51018	6.86126	7.33438	7.58408	0.473122	0.722829	0.249706	0.00500006	0.000279344	0.0164396	2.30103	3.55386	1.78411	4	5	5
Bles03	UPF0696 protein C11orf68 homolog	8.16465		8.13693	7.88863	8.21773	7.84415	7.39451	6.87914	6.82667	7.05656	7.58887	7.55622	7.26512	7.75573	7.23626	8.10198	7.20021	7.48044	-0.901773	-0.621541	0.280232	0.00500971	0.00201914	0.226493	2.30019	2.69483	0.644946	4	5	5
Tbc1d10b	TBC1 domain family member 10B	9.72943	9.94576	9.63722	9.74654	9.73426	9.30126	9.63729	9.08433	9.43795	9.3539	9.91583	9.97479	9.97619	9.84678	9.95791	9.75864	9.36295	9.9343	-0.395698	0.175657	0.571355	0.00503568	0.0141812	0.000283415	2.29794	1.84829	3.54758	5	5	5
Myl6	Myosin light polypeptide 6	10.2412	10.6078	10.4367	10.2202	10.1524	9.94521	10.0786	9.70729	10.0164	9.90688	10.7327	10.2331	10.6395	10.8533	11.1795	10.3317	9.93086	10.7277	-0.400811	0.395984	0.796795	0.00507493	0.0534718	0.0013638	2.29457	1.27188	2.86525	5	5	5
Csnk2a1	Casein kinase II subunit alpha	8.05137	8.06352	8.20459	8.24933	8.2032	8.24441	8.75137	8.45217	8.82548	8.67378	8.51969	8.76601	8.68631	8.81943	9.10217	8.1544	8.58944	8.77872	0.435037	0.624319	0.189281	0.00510775	0.000315069	0.222211	2.29177	3.50159	0.653235	5	5	5
Anxa6	Annexin A6	10.9977	11.0277	10.9811	11.2542	10.9626	10.5665	10.7304	10.4696	10.9553	10.6112	11.1339	10.8939	10.7965	11.2936	11.7711	11.0447	10.6666	11.1778	-0.378059	0.133112	0.511171	0.00513372	0.481541	0.0283276	2.28957	0.317366	1.54779	5	5	5
Cpne4	Copine-4	9.17645	9.49696	9.06624	9.03827	8.95448	8.86982	8.63078	8.73989	8.75935	8.7884	8.9263	9.02473	9.03759	8.94853	9.58054	9.14648	8.75765	9.10354	-0.388831	-0.0429439	0.345887	0.00518846	0.786982	0.0262589	2.28496	0.104035	1.58072	5	5	5
Gde1	Glycerophosphodiester phosphodiesterase 1	8.63282	8.41452	8.20335	8.18139	8.40523	8.61063	8.90406	8.95015	8.79992	8.62548	8.43429	8.42324	8.59991	8.86919	8.98515	8.36746	8.77805	8.66236	0.410587	0.294896	-0.115691	0.00520056	0.0693049	0.411962	2.28395	1.15924	0.385143	5	5	5
Slc25a11	Mitochondrial 2-oxoglutarate/malate carrier protein	10.5525	10.7542	10.1353	9.74015	10.5301	10.9513	11.8875	11.5974	10.9322	11.2657	10.6366	10.964	10.5688	10.7667	10.6527	10.3424	11.3268	10.7178	0.984366	0.375307	-0.609059	0.00524313	0.0887153	0.0152085	2.28041	1.052	1.81791	5	5	5
Dnajc28	DnaJ homolog subfamily C member 28	5.66287	7.21958	5.16212		6.88902	4.00198	4.96885	4.18864	2.88524	3.42927	3.91918	3.5607	3.68812	5.56287		6.2334	3.8948	4.18272	-2.3386	-2.05068	0.287923	0.00530417	0.0229733	0.630279	2.27538	1.63878	0.200467	4	5	4
Mal2	Protein MAL2	13.1435	13.9734	13.0103	12.7854	13.1511	12.7632	12.1972	12.4077	12.1435	11.9987	12.7227	10.822	11.8762	11.9668	10.6458	13.2127	12.3021	11.6067	-0.910671	-1.60604	-0.695364	0.00541335	0.00616924	0.12719	2.26653	2.20977	0.895547	5	5	5
Idh3g	Isocitrate dehydrogenase [NAD] subunit gamma 1, mitochondrial	9.81835	9.66905	9.65365	9.36607	9.63642	9.83894	9.91816	10.0248	10.2479	10.294	9.88666	10.1999	9.81776	9.43685	9.59675	9.62871	10.0647	9.78759	0.436041	0.158886	-0.277155	0.00545723	0.319128	0.117821	2.26303	0.496035	0.928778	5	5	5
Canx	Calnexin	12.3409	12.4956	12.5595	12.3058	12.1655	12.5364	12.682	12.9024	13.0973	13.0103	12.5636	12.7563	13.1011	13.5671	13.919	12.3735	12.8457	13.1814	0.472226	0.807966	0.335741	0.00549757	0.0147053	0.25182	2.25983	1.83252	0.59891	5	5	5
Gria2	Glutamate receptor 2	11.5782	11.8658	11.4596	11.5108	11.5304	11.0469	11.0985	11.2756	11.4275	11.2438	11.403	11.3981	11.8879	12.0034	12.0109	11.589	11.2185	11.7407	-0.370491	0.151711	0.522202	0.00556455	0.364526	0.0101078	2.25457	0.438272	1.99535	5	5	5
Scrn1	Secernin-1	8.18391	8.89189	8.27679	8.90031	8.27472	9.00337	9.32747	9.07131	9.15663	9.14092	8.65855	8.52463	8.44515	8.50688	8.95582	8.50552	9.13994	8.61821	0.63442	0.112682	-0.521737	0.00563836	0.558332	0.00117378	2.24885	0.253107	2.93041	5	5	5
Fam234b	Protein FAM234B	10.8822	10.8952	10.4	10.5466	10.627	10.4129	10.3239	10.2585	10.0642	10.1591	10.4507	10.406	10.5523	10.6743	10.7548	10.6702	10.2437	10.5676	-0.426464	-0.102586	0.323879	0.00572878	0.404867	0.00689345	2.24194	0.392687	2.16156	5	5	5
Pccb	Propionyl-CoA carboxylase beta chain, mitochondrial	7.3649	7.55057	6.637	6.54247	6.70159	7.63915	7.75881	8.07908	7.71761	7.72575	7.28122	7.43698	6.98411	7.09591	7.54919	6.9593	7.78408	7.26948	0.824773	0.310177	-0.514596	0.00573674	0.217936	0.00406619	2.24133	0.661671	2.39081	5	5	5
Sptbn1	Spectrin beta chain, non-erythrocytic 1	9.84378	10.5724	9.91146	9.78021	9.95203	9.49057	9.47701	9.46508	9.47444	9.48557	9.66485	9.95781	9.78596	9.54755	9.71113	10.012	9.47853	9.73346	-0.533449	-0.278522	0.254927	0.00583061	0.117006	0.00575972	2.23429	0.931792	2.2396	5	5	5
Ostc	Oligosaccharyltransferase complex subunit OSTC	7.42105		6.92003	6.9754	7.07037	7.34038	7.84343	8.01294	8.30457	7.96408	7.7703	8.14493	8.1675	8.43504	8.8085	7.09671	7.89308	8.26525	0.796368	1.16854	0.372173	0.00589592	0.00107528	0.149493	2.22945	2.96848	0.825381	4	5	5
Fads2	Acyl-CoA 6-desaturase	7.6496		7.39771	7.15647	7.12292	7.59676	8.02091	8.10909	8.38251	8.39188	8.03985	8.1118	8.17521	9.03697	9.6348	7.33168	8.10023	8.59973	0.76855	1.26805	0.499498	0.00590427	0.0115688	0.188849	2.22883	1.93671	0.723886	4	5	5
Ftl1;Ftl2	Ferritin light chain 1;Ferritin light chain 2	7.42604		7.22562	7.538	7.21681	7.71872	8.16667	7.74188	7.83051	7.67567	7.43372	7.54191	7.24414	7.66468	8.10059	7.35162	7.82669	7.59701	0.475073	0.245393	-0.22968	0.0059477	0.207918	0.210634	2.22565	0.682108	0.676472	4	5	5
Thoc2	THO complex subunit 2	7.7858	8.59213	7.98306	7.83376	8.36517	7.45809	7.72653	6.90992	7.34002	7.31476	7.12742	6.9633	6.62764	6.72058	8.05604	8.11198	7.34987	7.099	-0.762116	-1.01299	-0.250869	0.0059484	0.00963093	0.407755	2.2256	2.01633	0.389601	5	5	5
Pgm1	Phosphoglucomutase-1	7.0092	6.50865	6.22385	6.72223	6.33684	7.18904	7.51013	7.12282	7.04553	7.01409	6.40413	6.25678	6.28273	6.3432	6.54442	6.56016	7.17632	6.36625	0.616164	-0.193904	-0.810068	0.00594915	0.230398	4.80116e-05	2.22555	0.637521	4.31865	5	5	5
Ndufa13	NADH dehydrogenase [ubiquinone] 1 alpha subcomplex subunit 13	10.2841	9.8919	9.97054	9.47965	10.0342	10.3787	10.4706	10.9954	10.3736	10.7163	10.0398	10.4977	10.2606	10.1063	9.93104	9.93208	10.5869	10.1671	0.654838	0.23502	-0.419818	0.006086	0.188963	0.0266233	2.21567	0.723623	1.57474	5	5	5
Rhot2	Mitochondrial Rho GTPase 2	6.74459		6.5483	6.40951	6.53668	6.83553	7.41298	7.58944	7.30292	6.96223	6.66369	6.8212	6.81498	6.59331		6.55977	7.22062	6.7233	0.66085	0.163526	-0.497324	0.00608672	0.117023	0.0205211	2.21562	0.93173	1.6878	4	5	4
Trappc3	Trafficking protein particle complex subunit 3	9.80423	9.77089	9.56398	9.48356	9.56279	9.5785	9.0879	8.97049	9.20357	9.04228	9.58007	9.50562	9.31944	8.95226	8.99766	9.63709	9.17655	9.27101	-0.460539	-0.36608	0.0944598	0.00609785	0.0337339	0.587845	2.21482	1.47193	0.230737	5	5	5
Hsd17b11	Estradiol 17-beta-dehydrogenase 11	9.7474	9.79483	9.41583	9.0902	9.29217	10.0568	10.12	10.1446	9.95508	9.80188	9.34987	9.5834	9.58782	9.71223	9.95815	9.46809	10.0157	9.63829	0.547591	0.170206	-0.377385	0.0061073	0.337936	0.0122804	2.21415	0.471166	1.91079	5	5	5
Cd82	CD82 antigen	10.6827	10.5258	10.5463	11.1966	10.811	10.461	10.1792	10.3174	9.98188	10.012	11.0751	10.565	10.8317	9.90828	10.3068	10.7525	10.1903	10.5374	-0.562222	-0.215099	0.347123	0.00612653	0.39093	0.15739	2.21279	0.407901	0.803022	5	5	5
Rpl11	Large ribosomal subunit protein uL5	10.2006	10.4557	10.5401	10.5886	9.94019	9.90318	9.98848	9.80591	9.8553	9.86545	10.1083	10.7228	10.1256	10.5386	11.0254	10.345	9.88366	10.5041	-0.461374	0.159113	0.620487	0.00614334	0.478247	0.00843616	2.2116	0.320348	2.07386	5	5	5
Dnajc13	DnaJ heat shock protein family (Hsp40) member C13	9.35049	9.73611	9.29816	9.18779	9.19333	9.13396	8.93433	8.82891	8.91934	8.83833	9.36416	9.28925	9.23904	9.33075	9.63836	9.35318	8.93097	9.37231	-0.422203	0.0191373	0.44134	0.00619869	0.879667	0.00109037	2.2077	0.0556819	2.96243	5	5	5
Plch2	1-phosphatidylinositol 4,5-bisphosphate phosphodiesterase eta-2	9.85855	10.0713	9.78803	9.64288	9.83653	9.59216	9.33613	9.39224	9.49077	9.6746	9.89569	9.96989	9.57584	9.44195	9.98217	9.83946	9.49718	9.77311	-0.342285	-0.0663574	0.275927	0.00620921	0.625268	0.0618701	2.20696	0.203934	1.20852	5	5	5
Grk5	G protein-coupled receptor kinase 5			7.17462	6.5096	6.55009		8.05539	7.50055	7.80614	7.70784		7.83086	7.66384	7.24074	7.43439	6.74477	7.76748	7.54246	1.02271	0.797686	-0.225023	0.00623405	0.0197645	0.241468	2.20523	1.70411	0.617141	3	4	4
Alcam	CD166 antigen	10.0483	10.615	10.0705	10.2823	10.3042	10.7067	10.5679	10.8577	10.8467	10.5618	10.2611	9.97238	10.0203	10.4006	10.4057	10.2641	10.7082	10.212	0.444104	-0.052038	-0.496142	0.00624881	0.7152	0.00223482	2.2042	0.145573	2.65076	5	5	5
Slc25a3	Solute carrier family 25 member 3	10.6571	11.2159	10.3867	10.0284	10.8501	11.1898	12.2633	12.0956	11.4406	11.4608	10.4452	10.7811	10.4765	10.792	10.5857	10.6276	11.69	10.6161	1.06241	-0.0115418	-1.07395	0.00626556	0.958435	0.00121332	2.20304	0.0184376	2.91602	5	5	5
Afg3l2	AFG3-like protein 2	8.68818		8.47676	7.96767	8.67375	9.02529	9.49239	9.66705	8.94845	9.24183	8.58553	8.67948	8.5829	8.57449	9.19196	8.45159	9.275	8.72287	0.823414	0.271281	-0.552133	0.00628489	0.217197	0.0157112	2.2017	0.663146	1.80379	4	5	5
Adck1	AarF domain-containing protein kinase 1	8.97272		8.61853	8.49418		9.26048	9.22333	9.57494	9.15369	9.21865	9.21001	9.06908	9.34373			8.69514	9.28622	9.20761	0.591072	0.512461	-0.0786115	0.00633251	0.0352494	0.51847	2.19842	1.45285	0.285276	3	5	3
Cplx1	Complexin-1	6.2378	5.76946	6.80796	7.2296	6.51979	7.2862	7.20285	8.11803	7.62314	7.83202	7.69422	7.54851	7.60202	7.08886	7.49925	6.51292	7.61245	7.48657	1.09953	0.973652	-0.125876	0.00642262	0.00679409	0.545856	2.19229	2.16787	0.262922	5	5	5
Atp6v1g1	V-type proton ATPase subunit G 1	11.7083	11.5788	12.0788	11.8883	11.4926	11.5551	11.1081	11.293	11.2035	11.194	11.5248	11.1608	11.2591	11.6715	11.9208	11.7494	11.2707	11.5074	-0.478619	-0.24197	0.236649	0.00643609	0.201411	0.172107	2.19138	0.695916	0.7642	5	5	5
Ddx17	Probable ATP-dependent RNA helicase DDX17	9.3993	10.0816	9.28148	8.98542	9.32314	8.87049	8.3537	8.43374	8.85408	8.71654	9.02324	9.44902	8.90605	8.57241	8.8569	9.41419	8.64571	8.96152	-0.768481	-0.452669	0.315812	0.00645642	0.085115	0.114528	2.19001	1.06999	0.941087	5	5	5
Mgst1	Microsomal glutathione S-transferase 1	8.02932	7.73421	7.42739	6.96467	7.30702	8.28835	8.15621	8.30239	8.08042	8.07889	7.69502	7.83668	8.2392	7.97148	8.12666	7.49252	8.18125	7.97381	0.68873	0.481288	-0.207442	0.00647433	0.0482472	0.0935903	2.18881	1.31653	1.02877	5	5	5
Arrb2	Beta-arrestin-2	7.98755	7.60138	7.72337	7.66319	7.5964	7.57221	6.65674	6.8664	7.1176	7.21953	7.67596	7.94226	7.53998	7.74238	7.57109	7.71438	7.0865	7.69433	-0.627881	-0.0200425	0.607838	0.00649123	0.848784	0.00765947	2.18767	0.0712028	2.1158	5	5	5
Sdhb	Succinate dehydrogenase [ubiquinone] iron-sulfur subunit, mitochondrial	11.3304	10.9679	10.9682	10.5015	11.1455	11.4406	11.9518	12.3396	11.4153	11.7857	10.9561	11.2437	10.9401	11.0606	10.8614	10.9827	11.7866	11.0124	0.803909	0.0297019	-0.774207	0.00649171	0.850635	0.00297279	2.18764	0.0702569	2.52684	5	5	5
Calb2	Calretinin	8.46087		7.98254	8.29561	8.22118	9.19884	9.66815	9.07474	8.66589	8.77422	8.30093	7.75898	7.82503	7.84688	8.33571	8.24005	9.07637	8.01351	0.836318	-0.226546	-1.06286	0.00649701	0.216656	0.00118784	2.18729	0.664229	2.92524	4	5	5
Blvrb	Flavin reductase (NADPH)	6.84285	7.00574	6.96589	6.90088	6.39481	5.3152			5.82768	6.26975	6.62297	6.22522	6.35428	6.09974	5.69312	6.82203	5.80421	6.19907	-1.01782	-0.622966	0.394858	0.00649971	0.0109036	0.218045	2.18711	1.96243	0.661453	5	3	5
Ndufa5	NADH dehydrogenase [ubiquinone] 1 alpha subcomplex subunit 5	9.26802	8.30246	9.00897	8.55935	9.00753	9.2007	9.5759	9.68297	9.55436	9.73116	8.96909	9.47943	9.10048	9.29011	9.18893	8.82927	9.54902	9.20561	0.719753	0.376338	-0.343415	0.0065486	0.0889997	0.026906	2.18385	1.05061	1.57015	5	5	5
Strada	STE20-related kinase adapter protein alpha	7.0326		6.72389	6.9247	6.77056	7.11906		7.16089	7.34963	7.35932	6.99965	7.70642	7.33615	7.19639	7.49509	6.86294	7.24723	7.34674	0.384284	0.483798	0.0995132	0.00663534	0.0150165	0.52336	2.17814	1.82343	0.2812	4	4	5
Nsfl1c	NSFL1 cofactor p47	6.54633		6.56014	6.80112	6.91854	7.173	7.45267	7.24197	7.73599	7.01923	6.64557	6.62257	6.38503	6.67534	6.93818	6.70653	7.32457	6.65334	0.618039	-0.0531966	-0.671235	0.00664273	0.69057	0.002256	2.17765	0.160792	2.64666	4	5	5
Mccc2	Methylcrotonoyl-CoA carboxylase beta chain, mitochondrial	7.18123	7.82118	7.08894	6.78198	7.42572	7.94671	7.98613	8.26061	7.83116	7.77997	7.17068	7.42159	6.958	6.85103	7.1897	7.25981	7.96091	7.1182	0.701104	-0.14161	-0.842714	0.00669727	0.499883	0.000190054	2.1741	0.301132	3.72112	5	5	5
Grik5	Glutamate receptor ionotropic, kainate 5	7.70766		7.329	7.49181	7.40431	7.1876	6.87285	7.22002	7.16462	7.00083	7.66197	7.29844	7.77347	7.5014	7.59037	7.4832	7.08918	7.56513	-0.394014	0.081932	0.475946	0.00674624	0.502571	0.00179521	2.17094	0.298802	2.74588	4	5	5
Atl1	Atlastin-1	8.93491	8.94138	8.88692	8.59766	8.69589	8.96287	9.04395	9.22595	9.30792	9.29354	8.93001	9.17693	9.27204	9.60376	9.72857	8.81135	9.16685	9.34226	0.355496	0.530912	0.175416	0.00679687	0.0108099	0.306583	2.16769	1.96618	0.513452	5	5	5
Armc6	Armadillo repeat-containing protein 6	7.69494	7.43015	7.58093	7.68893	7.49346	7.42472	6.87371	6.96546	7.24542	7.28537	7.36399	7.71746	7.1375	6.71712	7.37175	7.57768	7.15894	7.26156	-0.418743	-0.316116	0.102627	0.00680106	0.104758	0.611731	2.16742	0.979812	0.213439	5	5	5
Hba	Hemoglobin subunit alpha	8.36283	9.51761	8.64091	8.82416	9.83875	8.24219	7.94814	7.85743	7.42398	8.10779	8.43589	8.63486	7.24221	8.69335	8.40384	9.03685	7.91591	8.28203	-1.12094	-0.75482	0.366123	0.00680599	0.0846808	0.25744	2.16711	1.07222	0.589324	5	5	5
Ppa2	Inorganic pyrophosphatase 2, mitochondrial	6.25741		6.43681	6.55739	6.30173	6.73124	6.71324	6.95115	7.22274	7.37768	6.80925	7.52127	7.15095	7.0108	7.40078	6.38834	6.99921	7.17861	0.610875	0.790274	0.179399	0.00682605	0.00155512	0.359498	2.16583	2.80824	0.444304	4	5	5
Idh1	Isocitrate dehydrogenase [NADP] cytoplasmic	7.01612	6.70202	7.39257	7.91783	7.5425	7.93565	8.3834	7.91221	8.34547	8.19793	7.88792	7.88138	7.74017	7.86537	8.47278	7.31421	8.15493	7.96953	0.840724	0.655319	-0.185405	0.00686291	0.0289783	0.287046	2.16349	1.53793	0.542048	5	5	5
Pycr3	Pyrroline-5-carboxylate reductase 3	6.8458		7.25555	7.37993	7.44981	7.52062	7.92598	7.78274	7.93848	7.75773	7.15143	7.76456	6.71192	7.37538	7.80407	7.23277	7.78511	7.36147	0.552334	0.128698	-0.423635	0.00694219	0.634503	0.0862616	2.1585	0.197566	1.06418	4	5	5
Atp6v1e1	V-type proton ATPase subunit E 1	12.1643	12.1514	12.4714	12.1645	12.2273	12.1323	11.6477	11.928	11.7535	11.8809	12.1911	11.8551	11.9539	12.2003	12.1517	12.2358	11.8684	12.0704	-0.367315	-0.165366	0.201948	0.00697612	0.111392	0.0984011	2.15639	0.953147	1.007	5	5	5
Cc2d1a	Coiled-coil and C2 domain-containing protein 1A	8.15631	9.16321	8.1557	8.03543	8.0036	7.24292	7.2693	7.31792	7.70734	7.66401	8.276	8.24794	8.26688	8.18446	8.03613	8.30285	7.4403	8.20228	-0.862551	-0.100569	0.761982	0.00699499	0.662308	0.000124964	2.15521	0.17894	3.90321	5	5	5
Tspan31	Tetraspanin-31	7.76484	8.17112	7.94831	8.05633	7.77664	7.63177	7.58921	6.843	7.24995	7.45487	7.39051	7.59828	7.2834	8.23837	8.12213	7.94345	7.35376	7.72654	-0.589688	-0.216911	0.372777	0.00706075	0.328357	0.160052	2.15115	0.483653	0.795739	5	5	5
Slco3a1	Solute carrier organic anion transporter family member 3A1	7.98517	8.89245	8.23963	8.55435	7.98619	7.65415	7.52035	7.29914	7.91699	7.65009	7.66333	7.73341	7.93897	8.38888	8.37389	8.33156	7.60814	8.0197	-0.723417	-0.311864	0.411552	0.00713662	0.218183	0.0560791	2.14651	0.66118	1.2512	5	5	5
Acsl6	Long-chain-fatty-acid--CoA ligase 6	11.545	11.333	11.5151	11.2455	11.3803	11.5026	11.8431	11.7696	11.9355	11.6508	11.3007	11.5275	11.6924	11.9647	12.2639	11.4038	11.7403	11.7498	0.336558	0.346055	0.00949636	0.0072101	0.0865632	0.960157	2.14206	1.06267	0.0176579	5	5	5
Ttc3	E3 ubiquitin-protein ligase TTC3	6.24798		6.12922	6.31666	6.53571	6.71316		6.67971	6.85406	7.14051	7.01918	7.8097	7.65566	7.26481	8.15231	6.30739	6.84686	7.58033	0.539468	1.27294	0.733471	0.007217	0.00108791	0.0200399	2.14164	2.96341	1.6981	4	4	5
Hs2st1	Heparan sulfate 2-O-sulfotransferase 1	9.98467	10.5675	9.28446	9.2965	9.65166	8.92371	9.1075	8.80285	8.77716	8.40088	8.96693	8.88057	9.18918	9.32621	9.52864	9.75696	8.80242	9.17831	-0.954543	-0.578657	0.375886	0.00722824	0.062635	0.0527738	2.14097	1.20318	1.27758	5	5	5
Myh10	Myosin-10	11.5269	11.6533	11.9752	11.8297	11.399	10.9854	11.1184	11.1358	11.4432	11.3413	12.4146	11.8869	12.3406	12.3832	12.7143	11.6768	11.2048	12.3479	-0.472025	0.671099	1.14312	0.0072295	0.00399363	8.26687e-05	2.14089	2.39863	4.08266	5	5	5
L1cam	Neural cell adhesion molecule L1	9.19828	9.75185	9.30794	9.56472	9.46256	9.62728	9.86071	9.93503	9.99213	9.96278	9.71276	9.49105	9.79703	9.82995	9.78511	9.45707	9.87559	9.72318	0.418516	0.26611	-0.152406	0.00725609	0.0486745	0.128096	2.1393	1.3127	0.892463	5	5	5
Prdx5	Peroxiredoxin-5, mitochondrial	9.98223	10.8822	9.95887	10.3308	10.2032	10.6742	10.8816	11.1084	10.9265	11.02	10.2557	10.2775	10.4409	10.0047	9.77282	10.2715	10.9221	10.1503	0.650683	-0.121156	-0.771838	0.00745342	0.57028	0.000522937	2.12764	0.243912	3.28155	5	5	5
Gpr180	Integral membrane protein GPR180	7.76713	8.22477	7.42419	7.60888	7.61097	7.31567	7.03291	7.15982	7.22679	7.3127	7.57244	7.97813	8.0195	8.1294	8.09947	7.72719	7.20958	7.95979	-0.51761	0.2326	0.75021	0.00747202	0.205829	0.000168662	2.12656	0.686493	3.77298	5	5	5
Aldh1l1	Cytosolic 10-formyltetrahydrofolate dehydrogenase	8.01271	8.70227	7.96017	8.02153	7.96071	8.69498	8.95405	8.40307	8.7892	8.80929	8.10449	8.24461	7.90816	8.2102	8.37255	8.13148	8.73012	8.168	0.598638	0.0365229	-0.562115	0.00785124	0.828349	0.00159205	2.10506	0.0817868	2.79804	5	5	5
Osbp	Oxysterol-binding protein 1	8.62176	9.7074	8.80446	8.74985	8.5507	7.9697	7.93448	7.54258	8.39131	8.15937	8.90081	9.3478	9.12203	8.76416	9.11641	8.88683	7.99949	9.05024	-0.887346	0.163407	1.05075	0.00791165	0.50272	0.000292382	2.10173	0.298673	3.53405	5	5	5
Pgk1	Phosphoglycerate kinase 1	8.03006	8.82319	8.13056	8.80141	8.12598	8.88789	9.41757	9.00365	9.1521	8.96005	8.20304	8.49678	8.06516	8.5904	9.24459	8.38224	9.08425	8.51999	0.702012	0.137755	-0.564256	0.00794478	0.624041	0.0366048	2.09992	0.204787	1.43646	5	5	5
Osbpl10	Oxysterol-binding protein-related protein 10	7.09853	7.07415	6.96972	6.44096	6.83626	6.43634	5.59439	6.03236	6.26986	6.50761	6.60133	7.56769	6.88254	6.39297	6.64814	6.88392	6.16811	6.81853	-0.71581	-0.0653891	0.65042	0.00799729	0.788456	0.0376903	2.09706	0.103223	1.42377	5	5	5
Gpm6a	Neuronal membrane glycoprotein M6-a	12.9364	12.0811	12.8467	13.067	13.1481	13.4067	13.6722	13.5024	13.6436	13.3643	13.0937	13.1632	13.1912	13.6528	13.6169	12.8159	13.5178	13.3436	0.701945	0.527717	-0.174228	0.00808485	0.0474333	0.232803	2.09233	1.32392	0.633011	5	5	5
Man2a2	Alpha-mannosidase 2x	7.37553	7.45768	6.98591	6.67979	7.22431	7.58668	8.02365	7.62052	8.09494	7.575	6.90433	7.17459	7.04091	7.5593	7.50625	7.14465	7.78016	7.23708	0.635511	0.09243	-0.543081	0.0081716	0.641116	0.0135059	2.08769	0.193063	1.86948	5	5	5
Myh9	Myosin-9	9.36877	9.87968	9.70541	9.52137	9.18109	8.96251	8.96844	8.94059	9.29541	9.06013	9.97441	9.77269	9.95396	9.99016	10.3857	9.53126	9.04542	10.0154	-0.485848	0.48413	0.969978	0.00818443	0.0157541	4.08636e-05	2.08701	1.80261	4.38866	5	5	5
Cisd1	CDGSH iron-sulfur domain-containing protein 1	9.75727	10.1466	9.41319	8.95169	9.67917	9.9633	10.5727	10.8634	10.2805	10.7546	9.70158	10.2689	9.74388	10.1477	10.3245	9.58958	10.4869	10.0373	0.89729	0.44773	-0.449559	0.00819642	0.0965561	0.0650213	2.08638	1.01522	1.18694	5	5	5
Slc25a32	Mitochondrial folate transporter/carrier	6.39317		6.18574	5.78262	5.4751	6.57426	6.61922	6.76382	6.5858	7.0791	6.89832	7.48571	7.11921	7.2786	7.32476	5.95916	6.72444	7.22132	0.765283	1.26216	0.496881	0.00822249	0.000579441	0.00687779	2.085	3.23699	2.16255	4	5	5
Mrps34	Small ribosomal subunit protein mS34			5.78741	5.1392			6.92689	6.75684	6.52897	6.49741	6.06362	6.47256	5.86263		5.9668	5.46331	6.67753	6.0914	1.21422	0.628094	-0.586127	0.00828658	0.0898496	0.0128562	2.08162	1.04648	1.89089	2	4	4
Clcc1	Chloride channel CLIC-like protein 1	7.91948		7.94179	7.77719	7.81383	8.15204	7.98995	8.45319	8.19801	8.18028	8.18767	8.10662	8.42062	8.57738	8.61489	7.86307	8.19469	8.38144	0.331622	0.518364	0.186742	0.00841834	0.0035924	0.177059	2.07477	2.44462	0.751883	4	5	5
Asph	Aspartyl/asparaginyl beta-hydroxylase	3.96488	4.81373	3.94549	3.46747	3.77198	3.66828	2.89287	2.97896	2.74319	2.4355	2.4198	2.1478	2.66456	3.28215	3.14748	3.99271	2.94376	2.73236	-1.04895	-1.26035	-0.211403	0.00845921	0.00359592	0.494644	2.07267	2.44419	0.305708	5	5	5
Anxa11	Annexin A11	9.83673	10.1422	9.41966	9.65656	9.89926	9.2965	9.57739	9.10066	9.21901	8.89569	9.18105	9.09428	8.97552	9.28124	9.40832	9.79088	9.21785	9.18808	-0.573026	-0.602792	-0.0297669	0.00846965	0.00283928	0.830938	2.07213	2.54679	0.0804314	5	5	5
Hnrnpc	Heterogeneous nuclear ribonucleoproteins C1/C2	7.67897	7.99659	7.586	7.19443	7.63125	6.60317	6.6336	5.97137	7.48597	6.66531	7.34309	7.91367	7.45602	7.38307	7.75211	7.61745	6.67189	7.56959	-0.945563	-0.0478555	0.897708	0.00847543	0.785534	0.00963432	2.07184	0.104835	2.01618	5	5	5
Kcnn2	Small conductance calcium-activated potassium channel protein 2	6.70184		6.52512	6.59261	6.60888	6.71755	6.93642	6.79112	6.97888	6.78265	6.60259	6.97668	6.77727	7.45687	7.73863	6.60711	6.84132	7.11041	0.23421	0.503297	0.269087	0.00852365	0.0769295	0.252148	2.06937	1.11391	0.598344	4	5	5
Uqcrfs1	Cytochrome b-c1 complex subunit Rieske, mitochondrial	10.639	10.8212	10.7572	10.2799	10.9878	10.9213	12.0433	11.9771	11.3258	11.4075	10.2298	10.8535	10.3976	10.6056	10.9912	10.697	11.535	10.6155	0.837973	-0.0814785	-0.919451	0.00853728	0.669158	0.0067059	2.06868	0.174472	2.17354	5	5	5
Shisa7	Protein shisa-7	7.13821	8.34749	7.20397	7.19855	7.3643	6.61677	6.22957	6.07677	6.95832	6.60314	7.23256	7.09076	7.21981	7.52731	7.25977	7.4505	6.49691	7.26604	-0.953589	-0.184459	0.76913	0.00858481	0.461219	0.00204891	2.06627	0.336093	2.68848	5	5	5
Glce	D-glucuronyl C5-epimerase	8.02223		7.56323	7.35723	7.80226	8.21894	8.42111	8.16549	8.49688	8.02128	7.25772	7.39139	7.37825	7.90176	8.29919	7.68624	8.26474	7.64566	0.578503	-0.0405734	-0.619076	0.00861517	0.879111	0.0207466	2.06474	0.0559564	1.68305	4	5	5
Nsun2	RNA cytosine C(5)-methyltransferase NSUN2	6.82987		7.03583	7.1979	7.29068			6.62149	6.5887	6.52923	6.76351	6.76705	6.83189	6.76301	7.30908	7.08857	6.57981	6.88691	-0.508765	-0.201663	0.307102	0.00864155	0.219982	0.0756115	2.06341	0.657614	1.12141	4	3	5
Timm10	Mitochondrial import inner membrane translocase subunit Tim10	8.06029	8.16186	7.98443	7.63839	8.61855	8.33781	8.86803	9.35841	8.80943	9.06693	8.31148	8.49531	8.19825	8.25057	8.13889	8.09271	8.88812	8.2789	0.795415	0.186195	-0.60922	0.00869371	0.30421	0.00918754	2.0608	0.516826	2.0368	5	5	5
Timm22	Mitochondrial import inner membrane translocase subunit Tim22	7.94357	8.23771	7.94133	7.27236	8.11255	8.58852	8.49566	8.87523	8.3345	8.47518	8.61914	8.76661	8.31622	8.26174	7.97303	7.9015	8.55382	8.38735	0.652316	0.485845	-0.16647	0.00881656	0.0560378	0.345767	2.0547	1.25152	0.461217	5	5	5
Epdr1	Mammalian ependymin-related protein 1	6.00731		6.17849	6.63197	6.50736	6.66332	8.34475	7.59771	7.68122	7.34445	6.60469	6.37084	6.6277	6.85054	6.93096	6.33128	7.52629	6.67694	1.19501	0.345663	-0.849346	0.0088925	0.0804715	0.0188	2.05098	1.09436	1.72584	4	5	5
Slc7a5	Large neutral amino acids transporter small subunit 1	10.6354	11.3809	10.6807	10.9651	10.7654	10.4259	10.1612	9.34129	10.3841	10.019	10.3095	10.0794	10.0262	10.4997	9.80703	10.8855	10.0663	10.1444	-0.81922	-0.741162	0.0780581	0.00889435	0.00347625	0.742439	2.05089	2.45889	0.129339	5	5	5
Mboat7	Lysophospholipid acyltransferase 7	6.92913	6.72443	6.79875	6.67338	6.69414	7.15526	7.18551	6.90771	7.19819	6.86026	7.00507	7.08174	7.19532	7.31392	7.9017	6.76397	7.06139	7.29955	0.29742	0.535585	0.238165	0.00891916	0.0121125	0.211407	2.04968	1.91677	0.674881	5	5	5
Vkorc1	Vitamin K epoxide reductase complex subunit 1	9.27591	9.58579	9.21093	9.06775	8.98952	9.68196	9.42191	9.9598	9.64885	9.71542	9.28027	9.16332	9.50223	9.93443	9.86892	9.22598	9.68559	9.54984	0.459609	0.323856	-0.135753	0.00901797	0.118746	0.463207	2.04489	0.925381	0.334224	5	5	5
Uqcr10	Cytochrome b-c1 complex subunit 9	10.8685	9.66631	10.7845	10.3747	10.5897	10.7091	11.6529	11.5437	11.4989	11.7064	11.027	11.7668	11.5525	11.6716	11.6134	10.4567	11.4222	11.5263	0.965477	1.06954	0.10406	0.00902095	0.00277423	0.654015	2.04475	2.55686	0.184412	5	5	5
Phb2	Prohibitin-2	11.2582	10.949	11.0698	10.55	11.4094	11.2568	11.85	12.1528	11.639	11.9816	11.3145	11.9154	11.5112	11.599	11.6088	11.0473	11.776	11.5898	0.728766	0.542512	-0.186254	0.00916279	0.0151736	0.337442	2.03797	1.81891	0.471801	5	5	5
Serinc3	Serine incorporator 3	8.80865	8.85833	8.55485	8.77687	8.52742	8.4186	8.44701	8.3637	8.57978	8.37813	8.59672	8.8214	8.57503	9.19712	9.48032	8.70522	8.43744	8.93412	-0.267782	0.228893	0.496675	0.00919036	0.261061	0.0250803	2.03667	0.583257	1.60067	5	5	5
Slc24a3	Sodium/potassium/calcium exchanger 3	8.34996		8.10819	8.18823	8.07287	7.98865		7.77317	7.88391	7.92225	8.06852	8.03362	8.31142	8.78178	8.79021	8.17981	7.89199	8.39711	-0.287819	0.217295	0.505114	0.00931423	0.303445	0.0339797	2.03085	0.51792	1.46878	4	4	5
Trim28	Transcription intermediary factor 1-beta	9.0155	9.3645	8.8669	8.87225	8.99793	8.69572	8.78451	8.38884	8.6731	8.66513	9.15279	9.5382	9.08402	9.31508	9.74548	9.02342	8.64146	9.36711	-0.381956	0.343696	0.725653	0.00943343	0.0543488	0.000825897	2.02533	1.26481	3.08307	5	5	5
Tmem87a	Transmembrane protein 87A	8.79214	9.15301	8.57926	8.7314	8.51281	8.35805	8.44987	7.94934	8.36366	8.24958	8.69179	8.69357	8.8005	8.50195	8.81082	8.75372	8.2741	8.69972	-0.479624	-0.0539989	0.425625	0.00959315	0.676715	0.00335744	2.01804	0.169594	2.47399	5	5	5
Hapln2	Hyaluro and proteoglycan link protein 2	10.3603	10.2854	9.37866	10.09	9.17396	9.16365	9.21139	8.85112	8.8819	8.83422	10.1925	9.29847	9.21046	9.40269	8.74127	9.85767	8.98846	9.36908	-0.869215	-0.488593	0.380622	0.00960915	0.186751	0.164561	2.01731	0.728738	0.783674	5	5	5
Lrig1	Leucine-rich repeats and immunoglobulin-like domains protein 1	5.96878		6.65742	6.71738	6.40262	6.93869		7.10428	7.21818	7.21025	7.06143	7.1627	7.13381	7.47631	7.47508	6.43655	7.11785	7.26187	0.6813	0.825315	0.144015	0.00963776	0.00254848	0.253808	2.01602	2.59372	0.595495	4	4	5
Kcnj16	Inward rectifier potassium channel 16	7.57567		7.77457	7.68442	7.82912	7.91177	8.17979	7.91688	7.95337	7.94049	8.04816	7.54966	7.6808	8.32298	8.71726	7.71594	7.98046	8.06377	0.264513	0.347828	0.083315	0.00970194	0.200494	0.71311	2.01314	0.697898	0.146843	4	5	5
Gnas	Guanine nucleotide-binding protein G(s) subunit alpha isoforms XLas	10.9115	11.1836	11.0085	11.0534	10.8161	11.1871	11.2565	11.153	11.4967	11.4164	11.162	11.4727	11.3939	11.6582	11.9938	10.9946	11.3019	11.5361	0.307334	0.541538	0.234204	0.00982196	0.0075647	0.167877	2.0078	2.12121	0.775009	5	5	5
Prrt2	Proline-rich transmembrane protein 2	10.6267	11.7751	10.4247	10.8032	10.5914	9.93013	10.1962	9.25796	10.0095	9.96867	10.2874	10.638	10.8077	11.4226	11.0973	10.8442	9.87249	10.8506	-0.97173	0.00636367	0.978094	0.00987797	0.984065	0.00462479	2.00533	0.00697618	2.33491	5	5	5
Anxa4	Annexin A4	9.33747	9.87188	9.21557	9.09219	8.98701	8.89657	8.57587	8.27581	8.92451	8.52399	8.86339	9.18152	8.50148	9.57757	10.0797	9.30083	8.63935	9.24073	-0.661478	-0.0600989	0.601379	0.00988565	0.853511	0.0804038	2.00499	0.0687907	1.09472	5	5	5
Myo5c	Myosin VC	6.84514		7.41958	6.93867	6.96553	7.32732	7.87054	7.43434	7.7347	7.61748	7.64757	7.99132	7.97523	8.20696	8.53937	7.04223	7.59688	8.07209	0.554645	1.02986	0.475213	0.0100289	0.00137586	0.0276702	1.99875	2.86143	1.55799	4	5	5
Mtrex	Exosome RNA helicase MTR4	5.45829		5.81014	5.25139	5.49962	4.83811		4.62582	5.20007	4.90971	4.57259	5.20868	4.90316	5.09062		5.50486	4.89343	4.94376	-0.611433	-0.561099	0.0503346	0.0101497	0.0208693	0.792066	1.99355	1.68049	0.101239	4	4	4
Sgta	Small glutamine-rich tetratricopeptide repeat-containing protein alpha	7.30655	6.56545	7.45098	7.69599	7.51976	7.88757	8.0394	7.91281	7.9909	8.00744	7.65802	7.77871	7.33559	7.86303	8.05878	7.30774	7.96762	7.73882	0.65988	0.43108	-0.228801	0.0103364	0.0974613	0.101143	1.98563	1.01117	0.995063	5	5	5
Nup205	Nucleoporin 205	7.27485		7.32229	7.14114	7.20038	6.95843	7.03319	6.45249	6.88459	6.65371	6.99258	7.32461	7.17549	6.16371	6.47992	7.23466	6.79648	6.82726	-0.438184	-0.407403	0.0307815	0.0103959	0.147899	0.902516	1.98314	0.830034	0.0445451	4	5	5
Hsd17b12	Very-long-chain 3-oxoacyl-CoA reductase	8.60437	8.2243	8.58935	8.38429	8.41316	8.52231	9.06967	8.77744	8.99528	8.82537	8.47566	8.82419	8.82499	9.66471	9.98312	8.44309	8.83801	9.15453	0.39492	0.71144	0.31652	0.0104056	0.0416913	0.323135	1.98273	1.37995	0.490616	5	5	5
Chchd6	MICOS complex subunit Mic25	8.12763	8.04248	7.74388	7.59433	8.23012	8.23712	8.49255	9.15612	8.42041	8.74174	7.85946	8.01799	7.79318	7.96815	7.85973	7.94769	8.60959	7.8997	0.661901	-0.0479892	-0.70989	0.0104405	0.714596	0.00251263	1.98128	0.145939	2.59987	5	5	5
Gria1	Glutamate receptor 1	10.4841	11.1751	10.4632	10.4269	10.5721	10.1212	10.2567	10.224	10.0714	9.96953	10.0873	9.79827	10.1996	10.3598	10.1609	10.6243	10.1286	10.1212	-0.495749	-0.503107	-0.00735871	0.0104711	0.0169509	0.946302	1.98001	1.77081	0.0239701	5	5	5
Cops2	COP9 signalosome complex subunit 2	6.87805		6.90385	7.06631	7.15413	7.22773	7.48233	7.1303	7.36417	7.36034	6.88641	7.55928	6.98066	7.08213	7.76054	7.00058	7.31297	7.2538	0.31239	0.253218	-0.059172	0.0104786	0.252503	0.753583	1.9797	0.597734	0.122869	4	5	5
Nceh1	Neutral cholesterol ester hydrolase 1	9.71758	10.0666	9.71224	9.55942	9.43095	9.71577	10.3877	10.5097	10.6349	10.4503	9.73678	10.2258	10.2638	10.8909	11.0423	9.69737	10.3397	10.4319	0.642311	0.734532	0.0922218	0.0104805	0.0227547	0.756878	1.97962	1.64293	0.120974	5	5	5
Letmd1	LETM1 domain-containing protein 1	8.51092	8.52838	7.97384	7.57401	8.0391	8.70085	8.62545	9.14758	8.63373	8.96598	8.46811	9.07997	8.77128	8.67255	8.90693	8.12525	8.81472	8.77977	0.689468	0.654519	-0.0349494	0.0104843	0.0134858	0.817644	1.97946	1.87012	0.0874357	5	5	5
Myl6b	Myosin light chain 6B	8.26816	8.77991	8.51976	8.29517	8.17158	8.06994	7.90657	7.9118	8.12521	8.06008	8.99301	8.16073	8.60107	8.87554	9.00477	8.40692	8.01472	8.72703	-0.392196	0.320108	0.712305	0.010492	0.135896	0.00257836	1.97914	0.866795	2.58866	5	5	5
Hs6st2	Heparan-sulfate 6-O-sulfotransferase 2	6.03186		6.14255	6.07713	5.96203	6.21937	6.75216	6.45529	6.71893	6.30453	6.09033	6.30869	6.0494	6.34283	6.92052	6.05339	6.49006	6.34235	0.436664	0.288961	-0.147703	0.0105026	0.151779	0.457105	1.9787	0.818789	0.339984	4	5	5
F3	Tissue factor	7.01784		7.35956	7.07772	7.42251	7.46028	7.85145	7.72861	7.88404	7.48946	7.29598	7.65562	7.66515	8.10086	7.83189	7.21941	7.68277	7.7099	0.463358	0.49049	0.0271315	0.0105964	0.0252219	0.86827	1.97484	1.59822	0.0613454	4	5	5
Pebp1	Phosphatidylethanolamine-binding protein 1	9.30868	9.54009	9.49031	10.3671	9.44318	10.1256	10.9715	10.3166	10.3868	10.285	9.90887	9.54478	9.61796	9.61051	10.2947	9.62988	10.4171	9.79537	0.787221	0.165499	-0.621722	0.0106665	0.500371	0.0149698	1.97198	0.300708	1.82478	5	5	5
Tspan2	Tetraspanin-2	11.4885	12.2918	11.9044	12.4536	12.1642	11.6065	11.4067	11.2789	11.5104	11.5497	12.1476	12.3667	12.0794	12.5164	12.5187	12.0605	11.4705	12.3258	-0.590035	0.265258	0.855293	0.0107813	0.20468	4.80826e-05	1.96733	0.688925	4.31801	5	5	5
Pgam1	Phosphoglycerate mutase 1	9.05963	8.93825	9.97374	10.3382	9.45438	9.95295	10.6106	10.643	10.9886	10.8951	9.97311	10.3571	10.047	10.1235	10.6639	9.55283	10.618	10.2329	1.0652	0.680099	-0.385098	0.0108306	0.050008	0.118851	1.96535	1.30096	0.924998	5	5	5
Lsmem1	Leucine-rich single-pass membrane protein 1	4.5385	5.35292	5.24714	5.88249	4.13937	3.66913			3.52938	2.45242	3.49589	2.93569	4.16762	5.13218	4.45279	5.03208	3.21698	4.03683	-1.81511	-0.995249	0.819857	0.0108527	0.0768739	0.207068	1.96446	1.11422	0.683887	5	3	5
Coq5	2-methoxy-6-polyprenyl-1,4-benzoquinol methylase, mitochondrial	7.85451		7.58157	7.35672	7.78056	8.55853		8.46934	7.93819	8.20878	8.12073	8.34973	8.0267	8.09758	7.88936	7.64334	8.29371	8.09682	0.65037	0.453481	-0.196889	0.0108891	0.0100602	0.228957	1.96301	1.99739	0.640246	4	4	5
Eipr1	EARP and GARP complex-interacting protein 1	7.87947	8.02708	8.08894	7.91657	7.87391	8.22994	8.05129	8.26081	8.6239	8.61139	8.44425	8.80158	8.33286	8.26939	8.70371	7.9572	8.35546	8.51036	0.398267	0.553161	0.154894	0.0108915	0.00116666	0.342324	1.96291	2.93306	0.465563	5	5	5
Nme1	Nucleoside diphosphate kinase A	7.91671	6.46262	7.55074	8.0655	7.79233	8.62762	8.787	8.16504	8.85784	8.48717	8.20895	8.40435	8.26824	8.41767	9.14547	7.55758	8.58494	8.48894	1.02735	0.931355	-0.0959986	0.0109369	0.0231662	0.65818	1.96111	1.63515	0.181656	5	5	5
Slc17a5	Sialin			3.93986	3.02761	4.8146	6.51985	7.64189	5.71498	5.85903	5.5051	5.54311	6.58243	6.0126	6.46828	7.01785	3.92735	6.24817	6.32486	2.32082	2.3975	0.0766877	0.0109781	0.00317662	0.872446	1.95947	2.49803	0.0592616	3	5	5
Pcdh9	Protocadherin 9	8.25935	9.41934	7.75126	7.90278	8.28524	7.5156	7.30198	7.48952	7.19407	7.14651	7.20024	6.76918	7.1414	6.9157	7.80733	8.32359	7.32953	7.16677	-0.99406	-1.15682	-0.162764	0.0109908	0.00965531	0.423845	1.95897	2.01523	0.372793	5	5	5
Gdap1	Ganglioside-induced differentiation-associated protein 1	8.64509	9.41973	8.51524	7.9086	8.75499	9.31494	9.48908	10.0697	9.2882	9.72894	8.90666	9.24299	9.01084	8.82275	8.61499	8.64873	9.57818	8.91965	0.929451	0.270918	-0.658533	0.0110363	0.333623	0.00623141	1.95718	0.476743	2.20541	5	5	5
Sfxn5	Sideroflexin-5	10.4871	10.5551	10.3395	9.79949	10.1737	10.5732	10.9321	10.9894	10.9389	10.5939	10.0165	10.4148	10.2485	10.4143	10.7311	10.271	10.8055	10.365	0.534531	0.0940709	-0.440461	0.0111432	0.612663	0.0179197	1.95299	0.212778	1.74667	5	5	5
P2ry12	P2Y purinoceptor 12	10.148	11.0898	10.1605	10.2997	10.3483	9.53743	10.1187	8.65466	9	9.64979	10.5359	10.8718	10.8138	9.8585	9.3638	10.4093	9.39212	10.2887	-1.01714	-0.120514	0.896626	0.0111706	0.732946	0.0501994	1.95193	0.134928	1.2993	5	5	5
Vcan	Versican core protein	10.5032	10.9397	9.90828	10.3681	9.93451	9.87759	9.71554	9.68132	9.56511	9.33415	10.4228	9.40039	9.59939	9.68113	9.24304	10.3308	9.63474	9.66934	-0.696034	-0.66144	0.0345944	0.0111795	0.0455906	0.880263	1.95158	1.34112	0.0553875	5	5	5
Pam	Peptidyl-glycine alpha-amidating monooxygenase	7.89227	8.03077	7.65174	7.48133	7.59958	8.35066	8.19736	7.94804	7.9969	8.20828	7.91328	7.40566	7.32961	7.93108	7.99493	7.73114	8.14025	7.71491	0.409111	-0.0162257	-0.425337	0.0112117	0.928281	0.0296067	1.95033	0.0323205	1.52861	5	5	5
Sdhc	Succinate dehydrogenase cytochrome b560 subunit, mitochondrial	7.20594	8.10606	6.78239	6.31684	6.87293	7.45272	8.33251	8.48238	8.37477	8.47938	7.5701	8.15353	8.02144	8.13339	7.95609	7.05683	8.22435	7.96691	1.16752	0.910079	-0.257441	0.0112657	0.0206441	0.279355	1.94824	1.6852	0.553844	5	5	5
Rabep1	Rab GTPase-binding effector protein 1			4.11703	3.50331			5.55603		6.11381	5.49047		4.30127		5.37341		3.81017	5.7201	4.83734	1.90993	1.02717	-0.88276	0.011409	0.238221	0.159557	1.94275	0.62302	0.797083	2	3	2
Hbb-bs	Beta-globin	11.2115	11.5231	11.0663	11.2509	12.3854	10.9658	10.6193	10.4359	9.57762	10.4749	10.8022	10.9961	10.011	10.8267	10.0302	11.4875	10.4147	10.5332	-1.07274	-0.954222	0.118514	0.0115509	0.0169201	0.714073	1.93738	1.7716	0.146257	5	5	5
Slc30a5	Proton-coupled zinc antiporter SLC30A5	8.30999	8.97235	7.45375	7.40158	7.85976	7.22888	7.3386	6.78401	6.72897	6.50062	7.16815	7.11551	7.26387	7.24651	8.29822	7.99949	6.91622	7.41845	-1.08327	-0.581032	0.502239	0.011665	0.152423	0.102382	1.93311	0.816948	0.989775	5	5	5
Suclg1	Succinate--CoA ligase [ADP/GDP-forming] subunit alpha, mitochondrial	9.20287	9.90848	9.36896	9.25461	9.12522	9.59381	9.92722	10.0224	9.88912	10.1182	9.28143	9.44563	9.01082	8.62035	8.8108	9.37203	9.91015	9.03381	0.538116	-0.338224	-0.87634	0.0116745	0.138132	0.00102327	1.93276	0.859705	2.99001	5	5	5
Tfam	Transcription factor A, mitochondrial	5.38254	5.56036	6.77388	5.98909	6.84036	7.37853	7.3438	7.72611	6.6912	7.06079	6.47368	5.84165	6.4874	4.9116	4.2948	6.10925	7.24009	5.60183	1.13084	-0.50742	-1.63826	0.0116807	0.365944	0.00809952	1.93253	0.436585	2.09154	5	5	5
Gapdh	Glyceraldehyde-3-phosphate dehydrogenase	11.0359	11.6541	11.5091	11.7093	11.4647	11.5067	12.6343	12.1589	12.3968	12.3126	11.552	11.8364	11.5895	11.6059	12.0694	11.4746	12.2019	11.7306	0.727244	0.256023	-0.471221	0.0117582	0.135018	0.0587983	1.92966	0.869608	1.23064	5	5	5
Syngr3	Synaptogyrin-3	15.1826	16.2615	15.1213	14.5864	15.1423	14.5475	14.7421	13.8483	13.5504	13.7926	14.999	14.6054	14.9348	14.5395	14.4004	15.2588	14.0962	14.6958	-1.16264	-0.562983	0.599658	0.0117975	0.0946558	0.0492604	1.92821	1.02385	1.3075	5	5	5
Ncam2	Neural cell adhesion molecule 2	9.16311	10.0764	9.28638	9.50021	9.48279	9.87872	10.0702	10.0957	10.1038	9.98879	9.48101	9.49096	9.59227	9.77524	9.67744	9.50179	10.0274	9.60339	0.525648	0.1016	-0.424048	0.0119437	0.558655	0.000310411	1.92286	0.252856	3.50806	5	5	5
Trim33	E3 ubiquitin-protein ligase TRIM33	7.61888	8.9961	6.98181	7.0153	7.25827	6.57795	6.40339	5.8422	6.4758	6.1795	7.0393	7.45502	7.05974	6.58104	7.10143	7.57407	6.29577	7.04731	-1.2783	-0.526766	0.751539	0.0120313	0.222601	0.00432817	1.91969	0.652473	2.3637	5	5	5
Dlst	Dihydrolipoyllysine-residue succinyltransferase component of 2-oxoglutarate dehydrogenase complex, mitochondrial	9.09709	9.39108	8.89461	8.2058	9.51811	9.74604	10.1599	10.2594	9.51417	9.77831	9.42523	9.29806	9.32999	8.55758	8.17459	9.02134	9.89156	8.95709	0.870219	-0.0642465	-0.934466	0.0121051	0.854977	0.0113022	1.91703	0.0680455	1.94684	5	5	5
P4htm	Transmembrane prolyl 4-hydroxylase			5.81358	5.86568	6.11667		7.4135	6.58395	6.82816	6.60791	6.3229	6.27789	6.68798	6.70217	7.30322	5.93198	6.85838	6.65883	0.926402	0.726854	-0.199548	0.0121605	0.0289371	0.481862	1.91505	1.53855	0.317078	3	4	5
Cntfr	Ciliary neurotrophic factor receptor subunit alpha	9.01972	8.38578	9.27286	9.37989	8.82962	9.26548	9.72577	9.75274	9.75448	9.60462	9.63988	9.7824	10.1354	10.1291	10.2464	8.97757	9.62062	9.98663	0.643045	1.00905	0.366007	0.0121695	0.00140754	0.039647	1.91473	2.85154	1.40179	5	5	5
Mtco1	Cytochrome c oxidase subunit 1	7.22431		7.50106	6.9232	7.29603	7.63195	8.61709	7.61379	8.19957	8.07368	8.322	8.93253	8.96066	8.30589	8.4293	7.23615	8.02721	8.59008	0.791061	1.35392	0.562862	0.0126229	0.00023858	0.0461371	1.89884	3.62237	1.33595	4	5	5
Ube2l3	Ubiquitin-conjugating enzyme E2 L3	7.60966		7.75286	7.75681	7.61939	7.84976	8.21091	7.8224	8.2593	8.08188	8.02789	8.46078	8.0303	7.74981	8.17501	7.68468	8.04485	8.08876	0.360169	0.404078	0.0439082	0.0126309	0.0207542	0.772312	1.89857	1.68289	0.112207	4	5	5
Tm2d2	TM2 domain-containing protein 2	9.24207	11.0913	8.93316	8.97385	9.17592	8.21595	8.51637	8.21995	7.84361	7.76505	8.67542	8.3507	8.55817	8.65996	8.65776	9.48327	8.11219	8.5804	-1.37108	-0.902868	0.468217	0.0126737	0.0591982	0.0144196	1.8971	1.22769	1.84105	5	5	5
Smc6	Structural maintece of chromosomes protein 6			4.94793	5.43332		7.13757		7.94309	6.65157	6.82661	6.95698				5.55488	5.19062	7.13971	6.25593	1.94908	1.0653	-0.883782	0.0127195	0.287517	0.21907	1.89553	0.541336	0.659416	2	4	2
Atp6v1d	V-type proton ATPase subunit D	12.2615	12.615	12.5266	12.3154	12.2456	12.1019	12.3072	11.9108	11.9644	12.063	12.3628	12.4496	12.4076	12.7852	12.8884	12.3928	12.0694	12.5787	-0.323387	0.185899	0.509286	0.0128759	0.193703	0.00397511	1.89022	0.712863	2.40065	5	5	5
Agl	Glycogen debranching enzyme	8.55		8.17726	8.00992	8.11607	9.06037	8.61763	8.43371	8.87357	8.71972	8.29172	8.8253	8.17642	8.6856	9.05008	8.21331	8.741	8.60582	0.527688	0.39251	-0.135178	0.0129266	0.106808	0.508906	1.88852	0.971398	0.293363	4	5	5
Zfpl1	Zinc finger protein-like 1	7.77323		8.25631	7.93945	8.23307	7.07929	7.32334	6.75277	7.87472	7.36877	7.86849	8.66487	8.64036	9.06298	9.77521	8.05051	7.27978	8.80238	-0.770734	0.751869	1.5226	0.0130532	0.0797628	0.00294716	1.88428	1.0982	2.5306	4	5	5
Qsox2	Sulfhydryl oxidase 2	7.31765	6.84917	7.04791	6.7382	7.25389	7.47293	7.42174	7.47905	7.85925	7.29699	6.65599	6.83557	6.67665	7.23265	7.52082	7.04137	7.50599	6.98434	0.464624	-0.0570309	-0.521655	0.0130577	0.785923	0.027447	1.88413	0.10462	1.56151	5	5	5
Map4k4	Mitogen-activated protein kinase kinase kinase kinase 4	7.33159		7.69189	7.62072	7.76497	7.27586	6.62495	7.03962	7.25382	7.19266	7.82319	7.73981	7.83132	8.06861	8.07475	7.60229	7.07738	7.90754	-0.524911	0.305241	0.830151	0.0134608	0.031928	0.000329178	1.87093	1.49583	3.48257	4	5	5
Shmt2	Serine hydroxymethyltransferase, mitochondrial	5.58545	5.89664	6.52178	5.60769	6.19407	6.92053	6.94789	6.2342	6.44747	7.11749	7.28715	7.81063	7.20032	7.19506	6.76721	5.96113	6.73351	7.25207	0.772388	1.29095	0.51856	0.0134864	0.000741147	0.0592282	1.87011	3.1301	1.22747	5	5	5
Atcay	Caytaxin	8.88994	8.87291	9.54263	9.38099	9.41729	8.32158	8.69531	8.44126	8.77415	8.97882	9.84253	10.1405	9.69083	9.15521	9.64842	9.22076	8.64222	9.69549	-0.578532	0.474732	1.05326	0.0136191	0.0569132	0.000730177	1.86585	1.24479	3.13657	5	5	5
Alg1	Chitobiosyldiphosphodolichol beta-mannosyltransferase	7.59088		7.66365	7.35529	7.38328	7.64625	7.78161	8.19351	8.29979	8.1817	7.68124	8.00806	8.08197	8.53894	8.99817	7.49827	8.02057	8.26167	0.522297	0.7634	0.241102	0.0139711	0.0249744	0.386163	1.85477	1.60251	0.413229	4	5	5
Atad3	ATPase family AAA domain-containing protein 3	8.59464		8.58897	8.33895	8.7015	8.6508	9.19616	9.31566	8.91016	9.23908	8.66014	8.94972	8.65862	8.88446	8.94729	8.55602	9.06237	8.82005	0.506357	0.264032	-0.242326	0.0139825	0.0351036	0.122786	1.85442	1.45465	0.910852	4	5	5
Acp1	Low molecular weight phosphotyrosine protein phosphatase	8.57365		8.27116	8.30621	8.24576	8.76381	8.78487	8.66808	8.4257	8.71342	8.42291	7.76382	8.21574	7.54925	7.46893	8.3492	8.67118	7.88413	0.321981	-0.465066	-0.787047	0.0140361	0.0746758	0.00407196	1.85275	1.12682	2.3902	4	5	5
Abhd4	(Lyso)-N-acylphosphatidylethanolamine lipase	10.7603	11.3994	10.2423	9.43877	10.7482	9.99685	9.5568	8.9648	8.0789	8.04265	8.97884	9.39952	9.26707	8.29852	9.54201	10.5178	8.928	9.09719	-1.58978	-1.42059	0.169189	0.014103	0.00689422	0.715506	1.85069	2.16151	0.145387	5	5	5
Acaa1b;Acaa1a	3-ketoacyl-CoA thiolase B, peroxisomal;3-ketoacyl-CoA thiolase A, peroxisomal	4.83617		5.10282	4.7834		5.94721		6.40285	6.17506	5.32603	5.17942	5.74159	5.68779	5.70521	6.00615	4.90746	5.96279	5.66403	1.05533	0.756568	-0.298757	0.0142217	0.00779148	0.278178	1.84705	2.10838	0.555677	3	4	5
Ubl4a	Ubiquitin-like protein 4A	3.83118		4.48146	4.96199	3.90803	5.3417	4.78779	5.32938	6.37391	5.86206	4.68394	5.15659	5.14095	5.13788	5.53181	4.29566	5.53897	5.13024	1.2433	0.834572	-0.408732	0.0142886	0.0200118	0.211311	1.84501	1.69871	0.675077	4	5	5
Reep1	Receptor expression-enhancing protein 1	6.47476		6.36555	5.92507	6.10209	6.84335	6.41957	7.70127	7.4106	7.1571	6.82788	6.55389	6.92333	6.81614	7.46935	6.21687	7.10638	6.91812	0.889508	0.70125	-0.188258	0.0143729	0.0106661	0.503544	1.84245	1.972	0.297962	4	5	5
Cdkl5	Cyclin-dependent kinase-like 5	8.46263	8.64294	8.45573	8.15763	8.36899	8.30884	7.77553	7.853	8.09915	8.11535	8.50494	8.75599	8.39185	8.14628	8.27938	8.41758	8.03037	8.41569	-0.387209	-0.00189316	0.385316	0.0144545	0.988766	0.026255	1.84	0.0049065	1.58079	5	5	5
Retreg2	Reticulophagy regulator 2			7.09355	6.72129	6.44229		8.37726	7.34549	8.79698	8.28854	8.37803	9.01122	8.62097	9.2521	10.0813	6.75237	8.20207	9.06873	1.44969	2.31636	0.866663	0.0144826	0.00143422	0.0832278	1.83915	2.84338	1.07973	3	4	5
Tpt1	Translationally-controlled tumor protein	6.75987	7.38001	7.33831	7.61648	7.30436	7.58974	8.01045	7.84225	7.86409	7.6121	7.27944	7.43336	7.25518	7.21226	7.62128	7.2798	7.78372	7.36031	0.503921	0.0805016	-0.423419	0.0145127	0.627998	0.00484545	1.83825	0.202042	2.31467	5	5	5
Slc25a12	Electrogenic aspartate/glutamate antiporter SLC25A12, mitochondrial	11.8638	11.7644	11.4053	10.9138	11.7562	11.8824	12.5863	12.4992	11.9491	12.2794	11.5547	12.0027	11.5608	11.7798	11.752	11.5407	12.2393	11.73	0.698576	0.189285	-0.509292	0.014587	0.356624	0.0145424	1.83603	0.44779	1.83736	5	5	5
Ppt1	Palmitoyl-protein thioesterase 1	8.7398	8.89182	8.79155	8.81846	8.88549	8.36905	8.16328	8.52782	8.76212	8.63253	8.45456	8.68291	8.59349	8.52765	8.80722	8.82542	8.49096	8.61317	-0.334462	-0.212256	0.122206	0.0147988	0.0139965	0.341863	1.82977	1.85398	0.466148	5	5	5
Ppp3ca	Protein phosphatase 3 catalytic subunit alpha	8.23434	8.99486	8.42625	8.44901	8.63317	8.77808	9.05041	9.00758	9.1409	8.94995	8.22632	8.88534	8.04801	8.82554	8.74974	8.54752	8.98538	8.54699	0.43786	-0.000534351	-0.438394	0.015019	0.998068	0.0420643	1.82336	0.000839953	1.37609	5	5	5
Kctd12	BTB/POZ domain-containing protein KCTD12	10.9517	11.5889	11.034	10.9684	10.9409	10.7806	10.8582	10.5976	10.4654	10.2851	10.1582	10.1291	10.0027	9.68392	10.2034	11.0968	10.5974	10.0355	-0.499408	-1.0613	-0.561894	0.0150302	0.00013537	0.00391108	1.82304	3.86848	2.4077	5	5	5
Pigt	GPI transamidase component PIG-T	9.20471	8.43975	8.97335	8.95227	8.86012	9.03042	9.46956	9.37048	9.50594	9.37968	9.28264	9.53177	9.7606	10.3226	10.6557	8.88604	9.35122	9.91066	0.465178	1.02462	0.55944	0.015057	0.00674201	0.0695618	1.82226	2.17121	1.15763	5	5	5
Ndufa8	NADH dehydrogenase [ubiquinone] 1 alpha subcomplex subunit 8	10.7258	10.3582	10.6227	10.0078	10.713	10.66	11.0717	11.5976	11.0223	11.2225	10.6392	10.9695	10.6519	10.6829	10.5552	10.4855	11.1148	10.6997	0.629311	0.21423	-0.415081	0.0151062	0.20092	0.0383236	1.82084	0.696976	1.41653	5	5	5
Tmem198	Transmembrane protein 198	4.58593		4.45281	5.0978	4.56444	4.96521	5.84243	5.32943	5.64059	5.13733	4.75899	5.58483	4.96574	5.94324	5.81009	4.67525	5.383	5.41258	0.707754	0.737332	0.0295786	0.0151778	0.0405117	0.91957	1.81879	1.39242	0.0364154	4	5	5
Arf5	ADP-ribosylation factor 5	9.7594	11.0617	9.22495	9.26796	9.56515	8.8353	9.07699	8.45291	8.5462	8.49409	9.01143	9.03056	9.08334	8.29597	8.79693	9.77584	8.6811	8.84365	-1.09475	-0.932197	0.162549	0.0153787	0.0344166	0.412909	1.81308	1.46323	0.384146	5	5	5
Npepps	Puromycin-sensitive aminopeptidase	8.47059	7.18517	8.24292	8.72944	8.37864	9.04714	9.35606	8.86527	9.14114	8.89994	8.62626	8.46493	8.3164	8.50375	9.13207	8.20135	9.06191	8.60868	0.86056	0.407329	-0.453231	0.0154291	0.212568	0.0256502	1.81166	0.672503	1.59091	5	5	5
Pfdn1	Prefoldin subunit 1	7.55066		7.32101	7.49029	7.45789	8.69807	8.68261	7.88162	8.13612	7.67191	7.35522	7.21707	7.053		7.17858	7.45496	8.21407	7.20097	0.759105	-0.25399	-1.0131	0.0157341	0.0182093	0.00410212	1.80316	1.73971	2.38699	4	5	4
Dpy19l1	Probable C-mannosyltransferase DPY19L1	6.96696	7.43064	7.42888	7.16358	7.12071	7.42991	7.54595	7.4611	7.93456	7.87268	7.63116	8.1379	8.11754	8.9008	9.17697	7.22215	7.64884	8.39288	0.426685	1.17072	0.744036	0.0157394	0.00424929	0.0388972	1.80301	2.37168	1.41008	5	5	5
Phyhip	Phytanoyl-CoA hydroxylase-interacting protein	9.79719	9.9912	9.64333	9.52418	9.81453	9.50515	9.60188	9.45412	9.43887	9.47733	9.64543	9.58036	9.42044	9.11318	9.40165	9.75408	9.49547	9.43221	-0.258617	-0.321872	-0.0632553	0.0157508	0.0296782	0.531273	1.8027	1.52756	0.274682	5	5	5
Mme	Neprilysin	7.29287		6.2162	6.55371		7.76138	7.79234	7.57133	7.49917	7.25154	7.56528	6.95421	7.17161	6.80506	7.32622	6.68759	7.57515	7.16448	0.887557	0.476882	-0.410676	0.015793	0.154908	0.0386735	1.80154	0.809927	1.41259	3	5	5
Ilvbl	2-hydroxyacyl-CoA lyase 2	8.50905	8.46758	8.53115	8.15769	8.22263	8.63677	8.46301	8.71185	8.86466	8.83729	8.53641	8.7002	8.90283	9.07512	9.36148	8.37762	8.70272	8.91521	0.325095	0.537586	0.212491	0.0158752	0.0111208	0.224387	1.79928	1.95386	0.649002	5	5	5
Hpca	Neuron-specific calcium-binding protein hippocalcin	11.3096	11.5648	11.4888	11.6447	11.2622	11.0535	11.3372	11.0242	11.2409	11.1871	11.3549	11.6923	11.5777	11.6757	11.7513	11.454	11.1686	11.6104	-0.285465	0.156353	0.441818	0.0158991	0.160755	0.00125495	1.79863	0.793834	2.90137	5	5	5
Cfap20	Cilia- and flagella-associated protein 20	8.33357	8.31765	7.82596	7.6663	7.96526	7.66924	7.61547	7.04817		6.9836	7.4286	7.73197	7.43376	7.45852	7.5183	8.02175	7.32912	7.51423	-0.692628	-0.507518	0.18511	0.0159906	0.00790607	0.317583	1.79613	2.10204	0.498142	5	4	5
Ano8	Anoctamin-8	7.79058	6.8615	8.03977	7.91579	7.92021	8.09343	8.64553	8.39136	8.64634	8.37039	7.87905	8.12995	8.27837	8.83159	8.71193	7.70557	8.42941	8.36618	0.723839	0.660606	-0.063233	0.0160417	0.0455008	0.766691	1.79475	1.34198	0.115379	5	5	5
Rps7	Small ribosomal subunit protein eS7	9.20497	9.36929	9.29128	9.16774	9.53552	9.35331	9.69465	9.66759	9.78187	9.56522	9.40618	9.82199	9.51276	9.52163	9.34845	9.31376	9.61253	9.5222	0.298767	0.208441	-0.0903259	0.0161846	0.0818359	0.434889	1.7909	1.08706	0.361622	5	5	5
Psmb7	Proteasome subunit beta type-7	7.35911	7.59476	7.4966	7.71514	7.58176	7.70304	7.69191	7.88796	8.24031	8.04038	7.99711	8.11105	7.58804	8.09696	8.3617	7.54947	7.91272	8.03097	0.363245	0.481496	0.118251	0.0161899	0.00855329	0.490047	1.79075	2.06787	0.309762	5	5	5
Cox6b1	Cytochrome c oxidase subunit 6B1	12.4869	12.4108	12.0634	11.3203	12.1486	12.5788	12.7557	13.3279	12.5883	12.9759	12.166	12.4829	11.9573	12.3082	12.5579	12.086	12.8453	12.2945	0.759331	0.208483	-0.550847	0.0161907	0.398365	0.014604	1.79073	0.399719	1.83553	5	5	5
Pnpla6	Patatin-like phospholipase domain-containing protein 6	7.02299		6.80459	6.85774	6.78262	6.97999	7.17781	7.14052	7.50111	7.22407	7.14214	7.26412	7.27481	7.81729	8.13728	6.86699	7.2047	7.52713	0.337714	0.660141	0.322427	0.016193	0.0210624	0.163052	1.79067	1.67649	0.787675	4	5	5
Gda	Guanine deaminase	8.87793	9.86344	8.89402	9.48598	9.20432	9.72493	10.5629	9.95489	9.91556	9.7925	9.27655	9.45267	9.25822	9.39705	9.73522	9.26514	9.99015	9.42394	0.725014	0.158803	-0.56621	0.0162193	0.462167	0.0109993	1.78997	0.335201	1.95863	5	5	5
Ankrd29	Ankyrin repeat domain 29	8.66752	8.12099	8.42222	8.06399	8.05308	8.06515	7.67495	7.41758	7.85391	7.85543	7.96445	7.99513	7.7759	7.88466	8.22249	8.26556	7.77341	7.96853	-0.492153	-0.29703	0.195123	0.016293	0.069508	0.175118	1.788	1.15797	0.756669	5	5	5
Mccc1	Methylcrotonoyl-CoA carboxylase subunit alpha, mitochondrial	6.79511		6.88704	6.55952	7.5312	7.73817	7.71247	7.66656	7.5242	7.29292	6.77314	7.0957	6.72745	6.57025	6.71434	6.94322	7.58686	6.77618	0.643648	-0.167039	-0.810686	0.0163666	0.446962	0.000140871	1.78604	0.34973	3.85118	4	5	5
Fam131b	Protein FAM131B	5.16379		5.71446	6.24272	5.69971	6.00751	6.7389	6.37005	7.0858	6.92984	5.88306	5.94134	6.02445	6.80423	7.48074	5.70517	6.62642	6.42676	0.921249	0.721593	-0.199656	0.0165859	0.116619	0.602391	1.78026	0.93323	0.220122	4	5	5
Sbno1;Sbno2	Protein strawberry notch homolog 1;Protein strawberry notch homolog 2	6.84093	7.75785	6.94366	6.61798	7.14387	6.55597	5.45368	5.77253	6.55743	6.44459	6.06586	6.11829	5.6934	5.07489		7.06086	6.15684	5.73811	-0.904016	-1.32275	-0.418732	0.0166343	0.00339469	0.2506	1.779	2.4692	0.601019	5	5	4
Gtf2ird1	General transcription factor II-I repeat domain-containing protein 1	9.00045		8.23254	8.71845	8.67996	8.25936	8.38845	7.57514	7.71298	7.6133	8.96222	7.88263	9.33271	7.62964	7.62472	8.65785	7.90985	8.28638	-0.748004	-0.371467	0.376537	0.016773	0.417034	0.372204	1.77539	0.379829	0.429219	4	5	5
Prkar2b	cAMP-dependent protein kinase type II-beta regulatory subunit	7.98523	8.7516	8.18574	8.33111	8.29976	8.44472	8.79549	8.77611	9.13329	8.96326	8.32563	8.73317	8.41501	8.48188	8.71441	8.31069	8.82257	8.53402	0.511885	0.223332	-0.288553	0.0168174	0.174413	0.0739854	1.77424	0.758422	1.13085	5	5	5
Maob	Amine oxidase [flavin-containing] B	10.9639	11.0519	10.564	10.3348	10.888	11.0856	11.3854	11.5658	11.1918	11.0608	10.5153	10.7957	10.5782	10.6381	10.5289	10.7605	11.2579	10.6112	0.497377	-0.149269	-0.646646	0.0168281	0.329956	0.000339773	1.77397	0.481544	3.46881	5	5	5
Ociad2	OCIA domain-containing protein 2	7.89889	8.09032	7.43435	7.18008	7.67861	7.92753	8.51996	8.57118	8.09914	8.22105	7.62156	8.10397	7.78723	8.13279	8.04142	7.65645	8.26777	7.93739	0.611319	0.280941	-0.330378	0.0168531	0.177714	0.0703196	1.77332	0.750279	1.15292	5	5	5
Camkv	CaM kinase-like vesicle-associated protein	10.8428	11.0023	10.8604	10.9591	11.0091	10.4947	10.759	10.6884	10.8361	10.8223	10.9336	11.1033	10.9178	10.9455	11.1018	10.9347	10.7201	11.0004	-0.214645	0.0656552	0.2803	0.0168816	0.264282	0.00571365	1.77259	0.577933	2.24309	5	5	5
Serbp1	SERPINE1 mRNA-binding protein 1	5.59752	5.40123	5.7612	5.76037	6.82689	6.5756	7.72857	7.31408	9.72866	7.02613	5.71082	5.76378	4.88902	6.66652	6.55948	5.86944	7.67461	5.91793	1.80517	0.0484833	-1.75668	0.0169236	0.908359	0.0245162	1.77151	0.0417425	1.61055	5	5	5
Ndufs3	NADH dehydrogenase [ubiquinone] iron-sulfur protein 3, mitochondrial	10.5492	10.8438	10.5554	9.9832	10.681	10.631	11.2552	11.4715	11.0527	11.2428	10.591	11.0815	10.8245	10.7681	10.6609	10.5225	11.1306	10.7852	0.608111	0.262666	-0.345445	0.0170331	0.156351	0.069263	1.76871	0.8059	1.1595	5	5	5
Rap1a	Ras-related protein Rap-1A	9.76267	9.81734	9.82087	10.041	9.63525	10.0633	9.97424	9.9442	10.1934	10.0898	10.3979	10.1689	10.3906	10.1895	10.5593	9.81543	10.053	10.3413	0.237551	0.525826	0.288276	0.0170664	0.000673446	0.00958346	1.76786	3.1717	2.01848	5	5	5
Rasgrp1	RAS guanyl-releasing protein 1	7.31135		7.23981	7.14668	7.84823	7.54179	8.28135	8.4016	8.20997	7.94667	8.43661	8.03881	8.66087	7.91211	8.44081	7.38652	8.07628	8.29784	0.68976	0.911328	0.221568	0.0171266	0.00338751	0.315314	1.76633	2.47012	0.501257	4	5	5
Lrrc3b	Leucine-rich repeat-containing protein 3B	9.02296		8.31724	7.76357	7.08768	8.97085		9.4633	10.0784	10.1592	10.011	10.2607	10.2576	10.0442	10.1277	8.04786	9.66794	10.1402	1.62007	2.09238	0.472307	0.0172513	0.000719352	0.10363	1.76318	3.14306	0.984513	4	4	5
Arel1	Apoptosis-resistant E3 ubiquitin protein ligase 1	7.00907		6.96457	6.76107	7.12088	7.33085	7.5333	7.27248	7.3634	7.04485	7.29121	7.46101	7.4673	7.65704	7.97449	6.9639	7.30898	7.57021	0.345078	0.606312	0.261233	0.0173087	0.00453779	0.10054	1.76174	2.34316	0.997663	4	5	5
Rab5c	Ras-related protein Rab-5C	10.1287	10.3435	10.1043	9.91706	10.0446	10.0377	9.65582	9.86671	9.78727	9.79513	10.2408	10.2082	9.98767	9.90077	9.95508	10.1076	9.82853	10.0585	-0.27911	-0.0491356	0.229974	0.0173339	0.630096	0.0390264	1.7611	0.200593	1.40864	5	5	5
Matr3	Matrin-3	10.0992	11.3258	10.1469	9.90765	10.2717	9.51654	9.76442	9.48755	9.58016	9.58546	9.78056	10.0915	9.81897	9.49703	9.37506	10.3503	9.58682	9.71263	-0.763433	-0.637629	0.125804	0.0173561	0.0528964	0.379777	1.76055	1.27657	0.420471	5	5	5
Ywhab	14-3-3 protein beta/alpha	11.5827	11.2214	11.5847	11.7011	11.7109	11.8446	11.8734	11.72	11.9659	11.8508	11.2074	11.4345	10.9767	11.0383	11.3526	11.5602	11.8509	11.2019	0.290768	-0.35827	-0.649039	0.0173849	0.021002	0.000146025	1.75983	1.67774	3.83557	5	5	5
Glt8d1	Glycosyltransferase 8 domain-containing protein 1	6.214		6.032	5.6195	6.5063	6.49166	7.25219	6.65394	7.01197	6.60453	5.18539	5.1482	5.33718	5.90521	4.96635	6.09295	6.80286	5.30847	0.70991	-0.784481	-1.49439	0.0173958	0.0148274	0.000115809	1.75956	1.82893	3.93626	4	5	5
Nudt21	Cleavage and polyadenylation specificity factor subunit 5	9.05244	8.54023	8.79317	8.75362	8.76147	8.20765	8.77279	8.0924	8.4397	8.22052	8.69834	9.05875	8.5654	8.64223	9.04754	8.78018	8.34661	8.80245	-0.433572	0.0222664	0.455838	0.0175706	0.870764	0.0211995	1.75521	0.0600996	1.67367	5	5	5
Vamp3	Vesicle-associated membrane protein 3	8.91187	9.58926	9.72555	9.558	9.20581	10.0809	9.48361	10.7242	10.4998	10.0706	10.2862	9.97389	10.0825	10.0251	9.87176	9.3981	10.1718	10.0479	0.773733	0.649801	-0.123931	0.01758	0.00416029	0.594543	1.75498	2.38088	0.225817	5	5	5
Psma1	Proteasome subunit alpha type-1	9.10575		9.28136	9.44732	9.71684	9.61905	10.7729	10.0016	10.3254	10.0202	9.39755	9.47293	9.06688	9.61043	9.78947	9.38782	10.1479	9.46745	0.760039	0.0796343	-0.680405	0.0176134	0.66791	0.0170828	1.75416	0.175282	1.76744	4	5	5
Pcbp2	Poly(rC)-binding protein 2	10.4149	10.8905	10.6029	10.3464	10.1865	9.91217	9.42773	9.56665	10.3023	10.1595	9.7922	9.76307	9.53583	9.68174	9.22377	10.4882	9.87365	9.59932	-0.614587	-0.888916	-0.274329	0.0176393	0.000521825	0.201159	1.75352	3.28248	0.696461	5	5	5
Atp6v1c1	V-type proton ATPase subunit C 1	12.2361	12.6504	12.3813	12.1751	12.1702	12.2091	12.0759	11.8815	11.7712	11.9086	12.2995	12.1924	12.289	12.4957	12.6467	12.3226	11.9692	12.3847	-0.353363	0.0620656	0.415429	0.017834	0.624705	0.00615468	1.74875	0.204325	2.21079	5	5	5
Sestd1	SEC14 domain and spectrin repeat-containing protein 1	6.28254	6.41765	6.09372	5.85588	6.79072	6.13459		5.15713	5.0913	5.38117	5.46627	5.93794	5.26335	5.67988	5.35553	6.2881	5.44105	5.5406	-0.847056	-0.747507	0.0995489	0.0179796	0.00549714	0.703671	1.74522	2.25986	0.15263	5	4	5
Crbn	Protein cereblon	7.82775	9.3752	8.36187	8.07533	7.43163	7.57776	7.19221	7.24977	7.01972	6.4592	7.02657	7.1991	7.19344	6.93926	6.90812	8.21436	7.09973	7.0533	-1.11463	-1.16106	-0.0464337	0.0180167	0.00832133	0.816761	1.74433	2.07981	0.0879048	5	5	5
Cox4i1	Cytochrome c oxidase subunit 4 isoform 1, mitochondrial	12.4616	11.8749	12.2425	11.5801	12.333	12.4452	13.1577	13.101	12.4237	12.7025	12.257	12.5687	12.1602	12.4381	12.4095	12.0984	12.766	12.3667	0.667623	0.268275	-0.399349	0.0180927	0.168732	0.0488612	1.7425	0.772802	1.31104	5	5	5
Tmem47	Transmembrane protein 47	9.37691	9.60561	9.39131	9.8922	9.75323	9.06755	9.49713	8.27046	9.09016	8.67596	8.80515	8.99581	9.23751	9.25524	9.7802	9.60385	8.92025	9.21478	-0.683598	-0.38907	0.294529	0.0181726	0.0776924	0.298403	1.74058	1.10962	0.525196	5	5	5
Rps11	Small ribosomal subunit protein uS17	10.3576	10.1909	10.5264	10.4058	10.5038	10.4342	10.8094	10.7079	10.7556	10.6006	10.3226	10.7802	10.582	10.6813	10.7376	10.3969	10.6615	10.6207	0.264628	0.223835	-0.0407932	0.0183216	0.0581863	0.708317	1.73704	1.23518	0.149773	5	5	5
Eef1d	Elongation factor 1-delta	5.92284		7.11588	7.60548	7.35728	8.0322	7.86582	8.01092	8.17189	8.00146	7.52716	7.37295	7.43582	7.34443	7.37455	7.00037	8.01646	7.41098	1.01609	0.410608	-0.605479	0.0183272	0.252846	6.64423e-06	1.7369	0.597144	5.17756	4	5	5
Chd5	Chromodomain-helicase-DNA-binding protein 5	7.84973		7.75014	7.50659	7.55906	7.3478		6.81022		6.51176	7.29276	6.97602	6.94714	6.78951		7.66638	6.88993	7.00136	-0.776452	-0.665023	0.111429	0.0184364	0.00241736	0.661538	1.73432	2.61666	0.179445	4	3	4
Tmem41a	Transmembrane protein 41A			5.8803	6.27939		6.5738	6.89167	6.49659	6.74658	6.5203	6.48378	6.50122	7.09431	7.36038	7.85971	6.07984	6.64579	7.05988	0.565945	0.980036	0.414091	0.0184555	0.0819826	0.167589	1.73387	1.08628	0.775755	2	5	5
Arhgap1	Rho GTPase-activating protein 1	9.18268	9.99081	9.07923	8.52779	9.12327	8.54382	8.59765	8.51384	8.42337	8.27398	8.42627	8.83028	8.61676	8.07434	8.32834	9.18076	8.47053	8.4552	-0.710224	-0.725556	-0.015332	0.0184675	0.0263198	0.915602	1.73359	1.57972	0.0382931	5	5	5
Gltp	Glycolipid transfer protein	8.5065	9.66099	8.3179	8.52726	8.33404	7.97018	7.94432	7.10045	8.109	7.66924	8.6276	8.3661	8.44736	8.48392	9.01623	8.66934	7.75864	8.58824	-0.910697	-0.0810918	0.829605	0.0184942	0.776897	0.00458613	1.73296	0.109636	2.33855	5	5	5
Plxna2	Plexin-A2	6.38424	6.93134	6.38463	6.39226	6.4514	6.72216	6.78509	7.01431	7.05302	6.81098	6.59293	6.79185	6.93127	7.00512	7.02218	6.50878	6.87711	6.86867	0.368336	0.359894	-0.00844139	0.0185819	0.0269216	0.937061	1.73091	1.5699	0.0282323	5	5	5
Syncrip	Heterogeneous nuclear ribonucleoprotein Q	7.67442	8.08515	7.73423	7.50013	7.82364	7.46035	7.63569	7.41518	7.24799	7.09768	7.84821	7.78253	7.48852	7.22654	7.40041	7.76351	7.37138	7.54924	-0.392134	-0.214271	0.177863	0.0186226	0.194971	0.266584	1.72996	0.710031	0.574166	5	5	5
Septin6	Septin-6	6.55046	7.7145	6.44884	6.60391	6.50144	7.36994	7.58492	7.60744	7.43698	7.40811	6.52175	6.71758	6.11216	6.61643	6.88093	6.76383	7.48148	6.56977	0.717648	-0.19406	-0.911708	0.0186261	0.495255	0.000165277	1.72988	0.305171	3.78179	5	5	5
Dnajb4	DnaJ homolog subfamily B member 4	7.56343		7.37053	7.15259	7.76897	7.34715	6.88126	6.98196	6.85867	6.86766	7.44164	7.18159	7.17532	7.0209	6.76668	7.46388	6.98734	7.11723	-0.476542	-0.346653	0.12989	0.018634	0.0818895	0.394387	1.72969	1.08677	0.404077	4	5	5
Opa1	Dynamin-like 120 kDa protein, mitochondrial	9.10489	9.75126	8.99775	8.66974	9.18968	9.32535	9.86735	10.0583	9.71043	9.94699	9.39883	9.80016	9.52197	9.52894	9.55831	9.14266	9.78169	9.56164	0.639027	0.418978	-0.220049	0.0186355	0.0561224	0.163135	1.72966	1.25086	0.787452	5	5	5
Atp6v1h	V-type proton ATPase subunit H	12.4519	12.9892	12.8912	12.6707	12.5411	12.4125	12.2682	12.2003	12.4411	12.5064	12.8757	12.8176	12.9152	13.1549	13.5027	12.7088	12.3657	13.0532	-0.343131	0.344423	0.687555	0.0186431	0.0664151	0.00109496	1.72948	1.17773	2.9606	5	5	5
Serinc1	Serine incorporator 1	10.5805	11.2016	10.1851	10.796	10.4114	10.2745	10.3101	9.74422	9.83036	9.95456	10.5733	10.5512	10.7565	11.0718	10.9499	10.6349	10.0227	10.7805	-0.612197	0.145593	0.757789	0.0187251	0.490533	0.00116671	1.72758	0.309332	2.93304	5	5	5
Rps27	Small ribosomal subunit protein eS27	8.97663	9.24336	9.25449	9.14168	8.88357	8.45526	8.13853	8.80443	8.99418	8.68288	9.39265	9.43031	9.5193	9.44237	9.84781	9.09994	8.61506	9.52649	-0.484888	0.426546	0.911434	0.0187868	0.00489167	0.000662876	1.72615	2.31054	3.17857	5	5	5
Gnai2	Guanine nucleotide-binding protein G(i) subunit alpha-2	10.3066	10.2515	10.6533	10.9233	10.4753	10.7735	10.8418	10.8813	11.0084	11.077	10.8209	10.8664	10.7495	11.1134	11.2702	10.522	10.9164	10.9641	0.394395	0.442083	0.0476884	0.0188972	0.0225569	0.683079	1.7236	1.64672	0.165529	5	5	5
Stmn1	Stathmin	7.18482	7.41388	7.78869	8.47999	7.25597	8.2285	8.28619	8.17615	8.80379	8.50261	8.1466	7.65929	7.62521	8.1683	9.02491	7.62467	8.39944	8.12486	0.774777	0.500195	-0.274583	0.0189952	0.187666	0.352108	1.72136	0.726615	0.453324	5	5	5
Glud1	Glutamate dehydrogenase 1, mitochondrial	8.689	10.3578	8.55233	8.48527	8.64462	9.77043	10.0466	10.208	10.0113	9.98724	8.86838	8.95522	8.7838	8.95492	9.10054	8.94581	10.0047	8.93257	1.05891	-0.0132339	-1.07214	0.0190542	0.971471	1.85852e-06	1.72001	0.0125702	5.73083	5	5	5
Kif3b	Kinesin-like protein KIF3B	9.35051	10.7882	9.37752	9.11396	9.29901	8.95699	8.16599	8.49083	8.89508	8.47841	8.62419	8.45136	8.51328	8.8304	8.34584	9.58585	8.59746	8.55301	-0.988385	-1.03283	-0.0444473	0.0190565	0.011232	0.798362	1.71996	1.94954	0.0978	5	5	5
Cryl1	Lambda-crystallin homolog	5.87283	6.15497	5.67408	6.00157	5.16479	6.23115	6.08741	6.33334	6.43333	6.63662	5.69091	6.32438	5.7848	6.16287	6.6618	5.77365	6.34437	6.12495	0.570721	0.351302	-0.219418	0.01907	0.19293	0.306155	1.71965	0.714601	0.514059	5	5	5
Ndufa12	NADH dehydrogenase [ubiquinone] 1 alpha subcomplex subunit 12	10.5592	9.25551	10.2855	9.71916	10.4161	10.5099	11.0374	11.3094	10.5847	10.9673	10.3715	10.8768	10.6157	10.6106	10.3661	10.0471	10.8818	10.5681	0.834663	0.521046	-0.313617	0.0191926	0.0815061	0.112683	1.71687	1.08881	0.948142	5	5	5
Slc8a2	Sodium/calcium exchanger 2	10.9598	11.4868	10.9296	11.2417	11.1428	10.6664	10.695	10.8096	11.0391	10.7842	11.0351	10.8483	11.2631	11.309	11.2069	11.1521	10.7989	11.1325	-0.353271	-0.0196569	0.333614	0.0193332	0.885656	0.0144841	1.7137	0.0527349	1.83911	5	5	5
Pepd	Xaa-Pro dipeptidase	6.79748		6.75178	7.40136	7.4315	7.59411	8.83472	7.48091	8.41975	8.13449	6.95664	7.17699	7.21756	6.95852	7.36574	7.09553	8.0928	7.13509	0.997265	0.0395589	-0.957707	0.0193697	0.837639	0.00687332	1.71288	0.0769429	2.16283	4	5	5
Rps15a	Small ribosomal subunit protein uS8	10.4141	11.0546	10.1753	10.1363	10.4797	10.1194	10.0893	9.87422	9.55953	9.31202	10.1085	9.28861	9.69396	9.31635	10.2708	10.452	9.79091	9.73566	-0.661084	-0.71633	-0.0552459	0.0194265	0.024565	0.833218	1.71161	1.60968	0.0792412	5	5	5
Ca4	Carbonic anhydrase 4	9.59316	9.3329	10.1102	10.0961	9.576	9.63862	8.59242	9.10923	8.9357	9.09352	9.6748	9.53301	9.71427	9.47409	9.18754	9.74168	9.0739	9.51674	-0.667783	-0.224937	0.442846	0.0194362	0.248251	0.0510175	1.71139	0.605109	1.29228	5	5	5
Sema4f	Semaphorin-4F	8.12468	8.3758	7.88375	7.94413	7.94027	8.36002	8.23723	8.30479	8.39689	8.34114	8.25668	8.2287	8.13805	8.40236	8.59475	8.05372	8.32802	8.32411	0.274291	0.270384	-0.00390757	0.0194842	0.0550197	0.964194	1.71032	1.25948	0.0158355	5	5	5
Arhgap32	Rho GTPase-activating protein 32	9.39986	11.0624	8.96559	8.87259	9.41826	8.65944	8.69652	8.20074	7.98902	7.96507	9.12019	8.6187	8.74006	8.54096	8.47878	9.54374	8.30216	8.69974	-1.24158	-0.843997	0.397581	0.0194905	0.0743813	0.076381	1.71018	1.12854	1.11701	5	5	5
Ddx5	Probable ATP-dependent RNA helicase DDX5	8.18519	8.85073	8.20668	7.99233	8.20958	8.03325	7.95291	7.63989	7.76056	7.54237	7.91734	8.00554	7.75276	7.52579	7.77493	8.2889	7.78579	7.79527	-0.503109	-0.493634	0.00947571	0.019585	0.018527	0.940653	1.70808	1.73219	0.0265705	5	5	5
Atp5pd	ATP synthase subunit d, mitochondrial	11.157	10.6009	10.8727	10.2581	10.9844	10.9357	11.4982	12.0442	11.2679	11.6943	10.9013	11.6802	11.1098	11.3257	11.2367	10.7746	11.4881	11.2507	0.713451	0.476114	-0.237337	0.0195911	0.0475366	0.327894	1.70794	1.32297	0.484266	5	5	5
Sdha	Succinate dehydrogenase [ubiquinone] flavoprotein subunit, mitochondrial	10.2714	10.826	10.207	9.63798	10.2703	10.3876	11.0629	11.5457	10.9023	11.2089	10.2129	10.6315	10.3412	10.4914	10.129	10.2425	11.0215	10.3612	0.778955	0.118672	-0.660283	0.0196923	0.586054	0.0141661	1.7057	0.232062	1.84875	5	5	5
Fnta	Protein farnesyltransferase/geranylgeranyltransferase type-1 subunit alpha	6.32026		6.37287	6.29747	5.81357		6.77415	6.45274	6.78931	7.0733	6.07394	6.52804	6.17486	6.53559	6.64321	6.20104	6.77238	6.39113	0.571333	0.190083	-0.38125	0.0199569	0.30246	0.0585224	1.69991	0.519332	1.23268	4	4	5
Cyc1	Cytochrome c1, heme protein, mitochondrial	11.4664	11.005	11.3377	10.5673	11.4435	11.4636	11.9821	12.3585	11.5086	11.9456	11.4241	11.6994	11.4118	11.2075	10.8618	11.164	11.8517	11.3209	0.687725	0.156975	-0.53075	0.02018	0.495548	0.0397912	1.69508	0.304914	1.40021	5	5	5
Ctbp1	C-terminal-binding protein 1	9.5085	10.4924	9.34286	8.7139	9.6842	8.85028	8.92996	8.67791	8.41515	8.46685	9.06821	8.58433	8.53177	8.23974	8.00203	9.54838	8.66803	8.48522	-0.880347	-1.06316	-0.182814	0.0202076	0.013843	0.401585	1.69449	1.85877	0.396223	5	5	5
Inpp4b	Type II inositol 3,4-bisphosphate 4-phosphatase	5.72232		5.91215	5.98874	5.87471	5.60425	5.55982	4.96351	5.41275	5.62341	5.21369	5.90249	5.69055	5.91568	6.04004	5.87448	5.43275	5.75249	-0.441732	-0.121987	0.319745	0.0203034	0.502633	0.132386	1.69243	0.298749	0.878156	4	5	5
Chkb	Choline/ethanolamine kinase	5.95137		6.05087	5.69901		6.2029		6.17941	6.21299	6.37234	5.63806	6.78964	6.36	6.17369		5.90042	6.24191	6.24035	0.341493	0.339928	-0.00156527	0.0203307	0.302193	0.995062	1.69185	0.519716	0.00214982	3	4	4
Arl3	ADP-ribosylation factor-like protein 3	8.54604	8.70544	8.22219	8.21974	8.52291	8.37469	8.05256	7.9468	7.38919	7.58275	7.94908	7.57108	7.82963	6.73656	6.85619	8.44326	7.8692	7.38851	-0.574067	-1.05476	-0.48069	0.0203671	0.00431022	0.153442	1.69107	2.3655	0.814055	5	5	5
Ypel5	Protein yippee-like 5	7.82818	8.80982	7.472	7.05344	7.49959	7.39247	6.31718	6.44627	6.67484	6.793	7.28011	7.3246	6.97388	6.14276	5.89804	7.7326	6.72475	6.72388	-1.00785	-1.00873	-0.000876203	0.0205189	0.0425458	0.998064	1.68785	1.37114	0.000841822	5	5	5
Anpep	Aminopeptidase N	10.4818	11.4326	10.5415	10.3444	10.1303	10.2216	9.85041	9.64863	9.69998	9.9746	10.2754	9.97813	9.77802	9.96585	10.1496	10.5861	9.87904	10.0294	-0.707068	-0.556724	0.150344	0.0206083	0.0480547	0.293238	1.68596	1.31826	0.53278	5	5	5
Ptn	Pleiotrophin	8.83347	10.2611	9.12926	8.84934	8.80678	8.31035	7.8394	8.60806	8.5372	8.10632	7.37717	7.74958	7.53808	7.44855	7.62768	9.17598	8.28027	7.54821	-0.895717	-1.62777	-0.732054	0.0206132	0.000449845	0.00154089	1.68585	3.34694	2.81223	5	5	5
Hnrnpk	Heterogeneous nuclear ribonucleoprotein K	9.69036	9.50749	9.51712	9.27306	9.70243	9.06783	9.18228	8.80389	9.45684	9.26349	8.9099	9.61633	9.3172	8.51598	8.90529	9.53809	9.15487	9.05294	-0.383226	-0.485153	-0.101927	0.0207917	0.0454008	0.652883	1.68211	1.34294	0.185164	5	5	5
Rdx	Radixin	11.3946	11.0087	11.2835	11.3211	11.3296	11.605	11.6246	11.3971	11.6404	11.3632	11.2477	11.2921	11.082	11.2069	11.5326	11.2675	11.5261	11.2722	0.258559	0.00473557	-0.253823	0.0208031	0.963329	0.0285685	1.68187	0.0162252	1.54411	5	5	5
Cend1	Cell cycle exit and neuronal differentiation protein 1	10.0646	10.8229	10.0195	9.01951	9.95842	10.7567	10.599	11.3582	10.6295	11.2564	10.2449	10.4167	10.2116	10.2211	10.0119	9.977	10.92	10.2213	0.942962	0.244256	-0.698706	0.020883	0.429685	0.00380326	1.68021	0.36685	2.41984	5	5	5
Rcan1	Calcipressin-1	9.0029	9.11003	8.49657	8.21226	8.64841	8.58372	7.99945	8.04611	7.91988	8.00238	8.28911	8.26316	8.15048	8.03412	8.45061	8.69403	8.11031	8.2375	-0.583725	-0.456537	0.127188	0.0209807	0.0339884	0.386747	1.67818	1.46867	0.412573	5	5	5
Ptp4a1	Protein tyrosine phosphatase type IVA 1	7.50734	9.12351	7.71388	7.75688	7.60523	7.27075	6.5963	6.9229	7.19812	7.10602	7.52712	7.71345	7.80696	7.70368	7.92728	7.94137	7.01882	7.7357	-0.922549	-0.205668	0.716881	0.0210296	0.520303	0.000806259	1.67717	0.283744	3.09353	5	5	5
Dab2ip	Disabled homolog 2-interacting protein	7.6999	8.8103	7.56716	7.69441	7.70555	7.24662	7.20151	6.96497	7.25498	7.38127	7.59094	7.76442	7.90742	7.19561	7.29821	7.89546	7.20987	7.55132	-0.685593	-0.344143	0.34145	0.0212711	0.233151	0.0538594	1.67221	0.632363	1.26874	5	5	5
Ubqln2	Ubiquilin-2	6.21566		6.24524	5.5514		7.78084	8.1654	7.37059	6.64229	6.70182	6.68857		6.39796	7.16138	7.13154	6.0041	7.33219	6.84486	1.32809	0.840764	-0.487325	0.0213869	0.0333084	0.233889	1.66985	1.47745	0.63099	3	5	4
Eif3b	Eukaryotic translation initiation factor 3 subunit B	8.62352	8.37907	8.72255	8.45033	8.50793	8.30115	8.30168	8.11654	8.39857	8.41244	8.22414	8.60646	8.21107	7.67898	8.00134	8.53668	8.30608	8.1444	-0.230606	-0.392281	-0.161676	0.021516	0.0435218	0.344162	1.66724	1.36129	0.463237	5	5	5
Ap3m1	AP-3 complex subunit mu-1	8.18468	8.45549	7.82704	7.37455	7.36902	7.42516	6.95839	6.9442	7.1999	7.31725	7.73179	8.3817	8.077	7.96608	8.46868	7.84216	7.16898	8.12505	-0.673179	0.282894	0.956073	0.0216412	0.299829	0.000420581	1.66472	0.523127	3.37615	5	5	5
Cryab	Alpha-crystallin B chain	9.53905	9.80938	9.84516	10.4052	9.80153	10.5253	10.194	10.5871	10.9386	10.0969	10.588	10.3187	10.0796	10.8886	11.7608	9.88007	10.4684	10.7271	0.588296	0.84706	0.258764	0.0217057	0.0310679	0.452919	1.66343	1.50769	0.343979	5	5	5
Got2	Aspartate aminotransferase, mitochondrial	8.81934	9.89534	8.64743	9.01422	8.74972	9.52321	10.033	9.93061	9.55871	9.61408	8.76899	8.80716	8.69788	9.10749	9.23434	9.02521	9.73191	8.92317	0.706706	-0.102036	-0.808742	0.0217104	0.692368	0.000590661	1.66333	0.159663	3.22866	5	5	5
Sh3bgrl2	SH3 domain-binding glutamic acid-rich-like protein 2			4.79336	4.48299	2.90293		5.79136	5.42384	7.01977	6.7127	5.70025	6.81691	6.61816	6.20209	6.80808	4.05976	6.23692	6.4291	2.17716	2.36934	0.192184	0.0217226	0.00364267	0.653287	1.66309	2.43858	0.184896	3	4	5
Abhd14b	Putative protein-lysine deacylase ABHD14B			3.77665	3.94315	3.67818		5.08726	4.08054	5.30478	5.18258		5.53576	4.76481	4.19702	5.85712	3.79933	4.91379	5.08868	1.11446	1.28935	0.174887	0.0217883	0.0348684	0.722063	1.66178	1.45757	0.141425	3	4	4
Lrfn5	Leucine-rich repeat and fibronectin type-III domain-containing protein 5	6.49938		6.14143	6.4468	6.60753	7.00612	6.44105	6.93753	7.07443	6.92906	6.76215	6.46321	6.5537	6.55791	6.07955	6.42378	6.87764	6.4833	0.453855	0.0595188	-0.394336	0.0218481	0.711545	0.037837	1.66059	0.147798	1.42208	4	5	5
Mtmr3	Myotubularin-related protein 3	5.69624		5.73576	5.46864	5.85648	6.23786	6.79362	5.7351	6.25681	6.53809	5.32082	6.90877	6.824	7.09498	8.12318	5.68928	6.31229	6.85435	0.623016	1.16507	0.542057	0.0220224	0.0575851	0.293434	1.65713	1.23969	0.532489	4	5	5
Eef1b	Elongation factor 1-beta	7.83822		8.01768	8.28416	8.26724	8.32963	9.10102	8.5017	8.71131	8.47786	7.85393	7.68388	7.93684	7.72395	8.00065	8.10182	8.62431	7.83985	0.522484	-0.261973	-0.784457	0.0220867	0.0589742	0.000692879	1.65587	1.22934	3.15934	4	5	5
Slc25a22	Mitochondrial glutamate carrier 1	9.31118	9.5017	8.91565	8.27636	9.32024	9.62682	10.3761	10.4914	9.39706	9.76825	9.24374	9.4087	8.87859	8.69335	8.2646	9.06503	9.93193	8.8978	0.866901	-0.167231	-1.03413	0.0221571	0.59091	0.00800883	1.65449	0.228479	2.09643	5	5	5
Vmp1	Vacuole membrane protein 1	8.71705	8.53583	8.67961	8.61518	8.90613	9.02613	9.62695	9.0903	9.09631	8.77126	8.75427	8.67367	8.88528	8.97395	9.42124	8.69076	9.12219	8.94168	0.431432	0.250923	-0.180509	0.0222484	0.120861	0.372403	1.6527	0.917712	0.428986	5	5	5
H2-L	H-2 class I histocompatibility antigen, L-D alpha chain	5.79551		6.13688	5.99357	6.49806	6.54123	7.17657	6.54666	6.64551	6.46889	6.30566	6.42662	6.25299	6.69476	8.38444	6.10601	6.67577	6.81289	0.569765	0.706889	0.137124	0.0223985	0.177998	0.752604	1.64978	0.749586	0.123434	4	5	5
Sec23a	Protein transport protein Sec23A	9.28161	9.28793	9.10503	8.66753	8.99274	8.97474	8.48852	8.26089	8.5954	8.69859	8.58792	9.01043	8.61879	8.12489	8.46628	9.06697	8.60363	8.56166	-0.463336	-0.505306	-0.0419699	0.0224049	0.0243799	0.826	1.64966	1.61297	0.0830201	5	5	5
Scd2;Scd1;Scd4;Scd3	Stearoyl-CoA desaturase 2;Acyl-CoA desaturase 1;Stearoyl-CoA desaturase 4;Acyl-CoA desaturase 3	4.65554		2.37053	3.10967	2.51533	4.86183		5.72832		5.28438	4.82818	4.90095	4.91636	5.3927	5.381	3.16277	5.29151	5.08384	2.12874	1.92107	-0.207673	0.0224311	0.00519199	0.432593	1.64915	2.28467	0.36392	4	3	5
Eif5	Eukaryotic translation initiation factor 5	7.46916		7.6636	7.7047	7.98771	7.97531	8.21195	7.84103	8.21312	8.10312	7.65023	7.74247	7.67285	7.43771	7.2115	7.70629	8.06891	7.54295	0.362616	-0.163341	-0.525957	0.022433	0.296628	0.00244188	1.64911	0.527788	2.61228	4	5	5
Rnf13	E3 ubiquitin-protein ligase RNF13	8.71899		8.39444	8.75691	8.33081	8.3571	8.15954	8.32635	8.14747	8.18525	8.07706	8.15992	8.06048	8.57773	8.4589	8.55029	8.23514	8.26681	-0.315149	-0.283475	0.031674	0.0227259	0.107542	0.789254	1.64348	0.968423	0.102783	4	5	5
Abhd3	Phospholipase ABHD3	8.34548	8.30763	8.16008	7.82319	8.16537	8.30717	8.7315	8.6381	8.49186	8.35432	8.2592	8.16397	8.50351	8.94511	9.42308	8.16035	8.50459	8.65897	0.344242	0.498627	0.154385	0.0229327	0.0826504	0.550246	1.63954	1.08275	0.259443	5	5	5
Hpcal1	Hippocalcin-like protein 1	9.96063	9.87883	10.2241	10.0327	10.0113	9.72927	10.0163	9.55338	9.71845	9.77173	10.0102	9.89368	9.87049	9.83476	10.0945	10.0215	9.75783	9.94074	-0.263675	-0.0807647	0.18291	0.0229501	0.312303	0.0736163	1.63922	0.505424	1.13303	5	5	5
Nrn1	Neuritin	8.99584	9.52468	9.2831	9.58336	8.88098	8.81205	8.51593	8.77318	8.99941	8.90484	9.64187	9.27405	10.0655	9.91139	9.38405	9.25359	8.80108	9.65537	-0.452512	0.401778	0.854289	0.0230382	0.0858014	0.00106078	1.63755	1.06651	2.97438	5	5	5
Tm9sf2	Transmembrane 9 superfamily member 2	9.6367	9.00949	9.34209	9.28096	9.411	8.80018	9.20176	8.76834	9.1483	8.84427	8.80531	9.09687	9.17101	9.26733	9.69094	9.33605	8.95257	9.20629	-0.383478	-0.129757	0.253721	0.0231829	0.481623	0.175211	1.63483	0.317293	0.756438	5	5	5
Sppl3	Signal peptide peptidase-like 3	8.22253	7.9933	7.51049	7.39562	7.22061	7.48125	6.63286	6.96127	6.97658	7.03607	7.55281	7.56055	7.69435	7.68678	8.19719	7.66851	7.0176	7.73833	-0.650905	0.0698247	0.72073	0.0231915	0.762093	0.00395059	1.63467	0.117992	2.40334	5	5	5
Notch2	Neurogenic locus notch homolog protein 2	7.664	8.70482	7.72484	7.67221	7.90289	7.50725	6.48277	7.10978	7.49921	7.25835	7.02089	6.84223	6.68458	7.04564	6.79117	7.93375	7.17147	6.8769	-0.76228	-1.05685	-0.294569	0.023327	0.000986161	0.179152	1.63214	3.00605	0.746778	5	5	5
Rab8a	Ras-related protein Rab-8A	9.87829		9.99012	9.86749	9.45704	9.72245	9.28414	9.35125	9.33403	9.29413	9.73608	9.87478	9.87935	9.82209	9.79368	9.79824	9.3972	9.8212	-0.401035	0.0229614	0.423997	0.0233475	0.836472	0.00118897	1.63176	0.0775488	2.92483	4	5	5
Hspa12a	Heat shock 70 kDa protein 12A	11.1737	11.5939	11.0379	10.756	11.0444	10.8484	10.6835	10.492	10.6967	10.7957	10.9767	11.0106	10.7936	10.2053	10.3301	11.1212	10.7033	10.6633	-0.417918	-0.457923	-0.0400045	0.0233673	0.066338	0.827494	1.63139	1.17824	0.0822351	5	5	5
Tcf25	Ribosome quality control complex subunit TCF25	7.61448	8.38812	7.37695	7.29817	7.75051	7.40288	7.11562	6.51057	6.98562	7.05552	7.2865	7.46277	7.32634	6.55864	6.84046	7.68565	7.01404	7.09494	-0.671603	-0.590702	0.0809015	0.0238565	0.0509445	0.726275	1.62239	1.2929	0.138899	5	5	5
Rps21	Small ribosomal subunit protein eS21	9.04716	10.3828	9.33634	9.29985	9.0988	8.50842	8.58069	8.45021	9.23647	8.35482	8.95571	9.05789	8.97878	9.09229	9.061	9.43298	8.62612	9.02913	-0.80686	-0.403849	0.403011	0.0238618	0.138312	0.035155	1.6223	0.859141	1.45401	5	5	5
Grpel1	GrpE protein homolog 1, mitochondrial	6.77017		6.38015	6.29602	6.93256	7.26493	7.29556	7.48538	6.7382	7.03311	6.22676	6.02049	6.29441	5.78541	5.27178	6.59473	7.16344	5.91977	0.568711	-0.674956	-1.24367	0.023878	0.0300718	0.000554443	1.622	1.52184	3.25614	4	5	5
Sv2b	Synaptic vesicle glycoprotein 2B	12.1196	12.4993	12.2651	12.0159	12.1987	11.8825	12.1018	11.6025	11.9976	11.8966	12.2531	12.5119	12.2617	12.4627	12.5908	12.2197	11.8962	12.416	-0.323526	0.196291	0.519817	0.0239883	0.101063	0.0012978	1.62	0.995407	2.88679	5	5	5
Rab3c	Ras-related protein Rab-3C	9.47009	10.249	9.16224	8.97201	9.0934	8.95271	8.53671	8.3706	8.84574	8.73443	8.96873	8.62802	8.6147	8.20946	8.1278	9.38935	8.68804	8.50974	-0.701306	-0.879605	-0.178299	0.0241989	0.0130048	0.366013	1.6162	1.8859	0.436503	5	5	5
Snrnp200	U5 small nuclear ribonucleoprotein 200 kDa helicase	7.59627	7.85104	7.25591	6.73225	7.24772	6.83873	6.68976	6.74848	6.953	6.76862	6.66057	7.34597	6.95551	6.88484	7.23505	7.33664	6.79972	7.01639	-0.536922	-0.32025	0.216672	0.0243651	0.193092	0.137488	1.61323	0.714237	0.861735	5	5	5
Man1a2	Mannosyl-oligosaccharide 1,2-alpha-mannosidase IB	8.18286	8.33559	8.0077	7.77594	8.19538	8.1992	8.59128	8.43694	8.85873	8.42107	7.99215	8.18387	8.17906	8.62096	9.164	8.09949	8.50144	8.42801	0.40195	0.328513	-0.0734365	0.0244905	0.194319	0.765067	1.611	0.711485	0.1163	5	5	5
Tpst2	Protein-tyrosine sulfotransferase 2	5.23044		4.98417	4.49481	5.39421	5.47621	5.72036	5.62131	6.73161	5.92648	4.54134	5.15851	4.67321	5.70553	6.75986	5.02591	5.8952	5.36769	0.869289	0.341782	-0.527506	0.0245425	0.507294	0.285196	1.61008	0.29474	0.544856	4	5	5
Mff	Mitochondrial fission factor	6.34777		6.87813	6.60945	6.96476	6.70478	7.86414	7.66166	7.34645	7.61978	7.17374	7.45837	7.0682	7.58601	7.68121	6.70003	7.43936	7.39351	0.739332	0.693478	-0.0458541	0.0245883	0.00652955	0.8491	1.60927	2.18512	0.0710412	4	5	5
Rgs7bp	Regulator of G-protein signaling 7-binding protein	7.33878		7.26528	7.54888	7.10576	7.72898	7.74543	7.5572	8.36561	7.71477	7.34327	7.2742	6.89769	7.09874	7.3972	7.31467	7.8224	7.20222	0.507722	-0.112456	-0.620178	0.0246349	0.419989	0.00593663	1.60845	0.376762	2.22646	4	5	5
Ptrh2	Peptidyl-tRNA hydrolase 2, mitochondrial	6.7155	6.85378	6.95156	6.67116	6.58591	6.88023	7.14457	7.0014	7.82212	7.70582	7.48048	7.67763	7.77562	8.09949	8.86866	6.75558	7.31083	7.98038	0.555251	1.2248	0.669546	0.0248282	0.00126203	0.0623086	1.60505	2.89893	1.20545	5	5	5
Prrt3	Proline-rich transmembrane protein 3	8.6464	9.50222	8.1976	8.65861	8.65794	8.23812	8.39972	8.04474	7.89209	7.79907	8.73246	8.36038	8.46429	8.75981	8.26235	8.73255	8.07475	8.51586	-0.657807	-0.216695	0.441112	0.0248363	0.381388	0.0177705	1.60491	0.418633	1.7503	5	5	5
Basp1	Brain acid soluble protein 1	14.4267	14.3317	14.662	14.995	14.3019	14.1485	13.3919	13.9691	14.1939	14.2294	15.0288	14.5133	15.0093	14.3811	14.0106	14.5435	13.9866	14.5886	-0.556883	0.0451901	0.602073	0.0248477	0.851219	0.0417073	1.60471	0.0699588	1.37979	5	5	5
Iqgap2	Ras GTPase-activating-like protein IQGAP2	7.67919	8.04028	7.41067	7.29941	7.39876	7.24447	7.01721	6.72854	7.21578	7.28848	6.99679	7.27388	6.96337	7.01965	7.12693	7.56566	7.0989	7.07612	-0.466767	-0.489538	-0.0227717	0.0250006	0.00994674	0.851794	1.60205	2.00232	0.0696653	5	5	5
Lmf2	Lipase maturation factor 2	5.34389		5.00078	5.16763	4.5206	5.29344	5.85957	5.33592	5.65272	5.83823	5.92074	6.19548	6.33496	7.26846	7.82981	5.00822	5.59597	6.70989	0.587749	1.70166	1.11391	0.0250613	0.0059422	0.0189105	1.601	2.22605	1.7233	4	5	5
Fndc10	Fibronectin type III domain-containing protein 10	8.38404	9.20034	8.36355	8.31178	8.38726	8.17942	8.15189	8.1247	7.70931	7.79836	7.88423	7.36172	7.8875	7.35411	6.65393	8.52939	7.99274	7.4283	-0.536657	-1.10109	-0.564436	0.0250875	0.00454821	0.0519443	1.60054	2.34216	1.28446	5	5	5
Gad1	Glutamate decarboxylase 1	7.39357	7.87182	7.27629	7.4895	7.53974	7.88171	7.87673	8.10292	7.66442	7.75423	7.58129	7.5164	7.38988	7.31616	7.20512	7.51418	7.856	7.40177	0.341821	-0.112412	-0.454233	0.0251318	0.379271	0.00191122	1.59978	0.42105	2.71869	5	5	5
Psmd6	26S proteasome non-ATPase regulatory subunit 6	9.51913	10.0749	9.50272	9.15988	9.52248	9.18825	9.19969	8.8086	9.20958	9.10303	9.28635	9.6845	9.36664	8.74155	9.19264	9.55582	9.10183	9.25434	-0.453986	-0.30148	0.152507	0.0251606	0.19236	0.396668	1.59928	0.715884	0.401573	5	5	5
Septin4	Septin-4	6.91023	6.86059	7.04297	7.09019	6.65674	7.25263	7.02545	7.0449	7.49571	7.422	7.38548	7.36354	7.04947	7.40223	7.86166	6.91215	7.24814	7.41247	0.335993	0.500328	0.164335	0.025164	0.010498	0.337606	1.59922	1.97889	0.471589	5	5	5
Trappc1	Trafficking protein particle complex subunit 1	8.0719	8.27765	8.22021	7.83422	7.81889	7.91163	7.4731	7.48452	7.77775	7.79162	8.16462	8.20015	7.85408	7.98966	8.16722	8.04457	7.68772	8.07514	-0.356852	0.0305699	0.387422	0.0251725	0.7989	0.00804727	1.59907	0.0975074	2.09435	5	5	5
Adamts10	A disintegrin and metalloproteinase with thrombospondin motifs 10	10.8606	10.8356	10.3792	10.1459	11.3191	10.3835	10.2467	10.0848	9.72561	9.80569	9.73056	9.20148	9.60886	9.21292	8.59363	10.7081	10.0493	9.26949	-0.658815	-1.43858	-0.779766	0.025304	0.00100173	0.0106612	1.59681	2.99925	1.97219	5	5	5
Atp5me	ATP synthase subunit e, mitochondrial	12.3063	11.886	11.7272	11.151	12.3595	12.4605	12.9415	13.4439	12.1987	12.6024	11.8944	12.1241	11.5619	11.2693	10.774	11.886	12.7294	11.5248	0.843396	-0.36122	-1.20462	0.0253609	0.296503	0.00553569	1.59584	0.527971	2.25683	5	5	5
Tgm2	Protein-glutamine gamma-glutamyltransferase 2	8.41517	8.74616	8.20085	7.73408	8.07329	7.95118	7.87552	7.20445	7.56451	7.63425	7.63755	7.89563	7.5141	7.24393	7.96472	8.23391	7.64598	7.65119	-0.587925	-0.582721	0.00520443	0.0253741	0.0260644	0.97834	1.59561	1.58395	0.00951022	5	5	5
Cacnb3	Voltage-dependent L-type calcium channel subunit beta-3	8.88323	10.0239	9.07267	8.97375	9.092	8.49527	8.67339	8.86739	8.5827	8.35118	8.85031	8.56954	8.96974	8.50565	8.25257	9.20911	8.59398	8.62956	-0.615122	-0.579544	0.0355778	0.0254309	0.0443629	0.823294	1.59464	1.35298	0.0844452	5	5	5
Xpnpep1	Xaa-Pro aminopeptidase 1	6.00936		6.82824	6.92775	6.42415	7.11428	7.11361	7.01796	7.09928	7.0221	6.7768	6.77609	6.52537	6.85563	6.82097	6.54738	7.07345	6.75097	0.526068	0.203594	-0.322474	0.0254403	0.332968	0.000849631	1.59448	0.477597	3.07077	4	5	5
Dhrs7	Dehydrogenase/reductase SDR family member 7			5.65145	5.11987	5.76042		6.62426	5.99941	6.14149	6.17449	5.99557	5.9512	6.14064	6.35337	6.95356	5.51058	6.23491	6.27887	0.72433	0.768285	0.0439546	0.0254916	0.034982	0.859171	1.5936	1.45615	0.0659204	3	4	5
Gpd2	Glycerol-3-phosphate dehydrogenase, mitochondrial	9.74035	10.1276	9.41965	9.09379	9.8766	9.82664	10.6999	10.824	10.1863	10.2252	9.61141	9.80111	9.51745	9.64985	9.61114	9.65159	10.3524	9.63819	0.700821	-0.0133987	-0.71422	0.0256546	0.944373	0.00522804	1.59084	0.0248564	2.28166	5	5	5
Serpinh1	Serpin H1	6.37037		7.17475	6.99172	6.96891	7.33601	7.57972	7.44182	7.16943	7.28664	7.11259	7.43813	6.9938	7.28045	7.41995	6.87644	7.36272	7.24899	0.486285	0.372546	-0.113739	0.0259514	0.0802129	0.335966	1.58584	1.09576	0.473705	4	5	5
Cenpv	Centromere protein V	9.11127	9.33224	8.97944	8.68059	8.86706	8.27578	8.46538	8.57531	8.61751	8.93484	9.18418	9.75073	9.24386	9.04484	9.782	8.99412	8.57376	9.40112	-0.420357	0.407003	0.82736	0.0260027	0.0625846	0.0022086	1.58498	1.20353	2.65588	5	5	5
Ttc9b	Tetratricopeptide repeat protein 9B	7.1643		7.13254	6.8386	7.19803	6.89475	6.59761	6.62663	6.66212	6.99886	7.17573	8.02606	7.04939	7.9544	8.33476	7.08337	6.756	7.70807	-0.327372	0.624699	0.952072	0.0260854	0.0719813	0.00700621	1.5836	1.14278	2.15452	4	5	5
Grn	Progranulin	6.88817	6.47706	7.20113	7.39967	7.72641	7.58402	7.69799	8.043	7.88393	7.62677	7.30477	6.98648	7.26265	7.25682	7.71828	7.13849	7.76714	7.3058	0.628657	0.167315	-0.461342	0.0261109	0.512887	0.013234	1.58318	0.289979	1.87831	5	5	5
F11r	Junctional adhesion molecule A	7.86604	8.93023	7.98623	8.21453	8.17906	7.95405	7.59275	7.50428	7.6244	7.76399	7.7449	8.01937	8.00757	7.88633	8.19592	8.23522	7.68789	7.97082	-0.547323	-0.2644	0.282924	0.0261487	0.22205	0.0313926	1.58255	0.653549	1.50317	5	5	5
Timm50	Mitochondrial import inner membrane translocase subunit TIM50	7.29907	7.84719	7.23905	6.77098	7.38338	7.55883	8.06741	7.96371	7.82823	7.74509	7.37168	7.73314	7.45607	7.46909	7.40683	7.30793	7.83265	7.48736	0.52472	0.179426	-0.345295	0.0262703	0.356062	0.0130946	1.58053	0.448475	1.88291	5	5	5
Wdr91	WD repeat-containing protein 91	8.45756	9.56915	8.02568	7.84402	8.2014	8.01849	7.11041	7.31266	7.42257	7.59777	7.97505	7.77082	7.69003	7.37449	7.01308	8.41956	7.49238	7.5647	-0.927183	-0.854866	0.072317	0.0263441	0.0395935	0.759041	1.57932	1.40238	0.119735	5	5	5
Snrpb;Snrpn	Small nuclear ribonucleoprotein-associated protein B;Small nuclear ribonucleoprotein-associated protein N	9.1867		9.06298	8.75694	9.22274	8.72793	8.92973	8.71545	8.75769	8.57099	8.95354	8.87458	8.58351	8.26987	8.14012	9.05734	8.74036	8.56432	-0.31698	-0.493014	-0.176034	0.0266918	0.0465398	0.331663	1.57362	1.33218	0.479303	4	5	5
Tmcc1	Transmembrane and coiled-coil domains protein 1	8.66468	9.54945	8.62925	8.47033	8.74914	8.34861	8.30767	8.43266	8.19821	8.06648	8.11685	7.72941	8.00769	8.21037	8.08041	8.81257	8.27073	8.02895	-0.541844	-0.783625	-0.241781	0.0267075	0.00527956	0.0476455	1.57337	2.2774	1.32198	5	5	5
Grik3	Glutamate receptor ionotropic, kainate 3	8.88971	8.56248	8.7163	8.99738	8.94833	9.07082	9.0339	9.09707	9.18998	8.94207	8.97677	9.22899	9.4114	9.41597	9.80393	8.82284	9.06677	9.36741	0.243928	0.544569	0.300641	0.0268415	0.00861168	0.0660404	1.57119	2.06491	1.18019	5	5	5
Plppr2	Phospholipid phosphatase-related protein type 2	9.27906	10.9637	8.4492	8.59678	8.78997	8.33183	7.47921	7.99395	7.8515	7.94639	8.2608	7.89669	8.3242	8.31889	7.43563	9.21574	7.92057	8.04724	-1.29517	-1.1685	0.126668	0.0268774	0.0442575	0.580529	1.57061	1.35401	0.236176	5	5	5
Ndufb4	NADH dehydrogenase [ubiquinone] 1 beta subcomplex subunit 4	11.2701	9.85389	11.1498	10.4251	11.2082	11.2281	11.7925	12.0256	11.3576	11.7522	10.9482	11.5828	11.0755	11.1156	10.8123	10.7814	11.6312	11.1069	0.849814	0.325474	-0.52434	0.0269637	0.319825	0.0284929	1.56922	0.495088	1.54526	5	5	5
Sdhd	Succinate dehydrogenase [ubiquinone] cytochrome b small subunit, mitochondrial	8.43246		8.06626	7.75189	8.30857	8.39913	8.91658	8.74464	8.4845	8.52289	8.13401	8.3488	7.92639	8.36938	8.43513	8.13979	8.61355	8.24274	0.473753	0.102949	-0.370804	0.0270708	0.562479	0.023959	1.5675	0.249894	1.62053	4	5	5
Vps13d	Vacuolar protein sorting 13D	8.29143		8.5647	8.38692	8.52254	8.24231	8.40865	8.06745	7.95426	8.02027	8.27164	8.3678	8.21365	8.38928	8.31055	8.4414	8.13859	8.31058	-0.30281	-0.130815	0.171996	0.0271252	0.0876607	0.0882659	1.56663	1.0572	1.05421	4	5	5
Tomm40	Mitochondrial import receptor subunit TOM40 homolog	8.34565	8.7312	7.93346	7.41707	8.20162	8.45863	9.53039	9.42019	8.60842	8.77478	8.07324	8.40463	8.22985	8.24309	8.25107	8.1258	8.95848	8.24038	0.832682	0.114577	-0.718106	0.0271947	0.624763	0.0124429	1.56552	0.204285	1.90508	5	5	5
Ace	Angiotensin-converting enzyme	11.3175	11.3895	10.3474	10.3063	10.7987	10.3256	10.2459	9.64042	10.1512	10.2701	8.48935	9.55005	8.4151	9.49871	8.94275	10.8319	10.1266	8.97919	-0.705245	-1.85269	-1.14744	0.0273096	0.000529495	0.00284808	1.56369	3.27614	2.54545	5	5	5
Gne	Bifunctional UDP-N-acetylglucosamine 2-epimerase/N-acetylmannosamine kinase	5.93213		6.29653	6.15843	5.65921	6.31332		6.37482	6.60008	6.57822	6.34292	6.85087	6.2227	6.3813	6.53744	6.01157	6.46661	6.46704	0.455038	0.455471	0.000433256	0.0273322	0.0341118	0.997585	1.56333	1.4671	0.0010499	4	4	5
Synpr	Synaptoporin	11.3501	10.2799	11.5502	11.1642	11.2443	10.5369	9.79467	10.312	10.4867	10.7745	10.9414	11.759	11.3295	11.3875	11.8261	11.1177	10.381	11.4487	-0.736747	0.330971	1.06772	0.0274925	0.257695	0.00163731	1.56079	0.588894	2.78587	5	5	5
Tecpr1	Tectonin beta-propeller repeat-containing protein 1	8.40036	9.78113	8.40712	8.34352	8.52483	8.09713	7.96639	7.91799	7.87453	7.8773	8.42704	8.3712	8.44056	8.0865	8.44355	8.69139	7.94667	8.35377	-0.744721	-0.337622	0.407099	0.0276005	0.26604	0.00090997	1.55908	0.575053	3.04097	5	5	5
Dzip3	E3 ubiquitin-protein ligase DZIP3	5.31379	5.44152	5.51238	5.74502	6.12086	5.87801		6.15945	6.19418	6.21961	6.06591	6.44896	6.33596	6.36299	6.71863	5.62672	6.11281	6.38649	0.486095	0.759772	0.273677	0.0276676	0.00260569	0.0874208	1.55803	2.58408	1.05839	5	4	5
Srcin1	SRC kinase signaling inhibitor 1	7.34668	7.20218	7.41428	7.77157	7.68871	7.61018	8.16502	7.82379	8.04541	7.74749	7.9836	7.77752	7.77969	8.06366	8.17869	7.48469	7.87838	7.95663	0.39369	0.471947	0.0782573	0.0276918	0.00746234	0.557504	1.55765	2.12713	0.253752	5	5	5
Chchd3	MICOS complex subunit Mic19	8.24483	8.71229	8.01735	7.74402	8.29392	8.25405	8.88505	9.57504	8.80393	9.07423	8.22579	8.49599	8.45793	8.52143	8.40965	8.20248	8.91846	8.42216	0.715981	0.219678	-0.496302	0.0278483	0.229326	0.0539015	1.5552	0.639548	1.2684	5	5	5
Fads3	Fatty acid desaturase 3	6.79509		6.62233	6.40494	6.92146	6.62412	6.16515	6.31093	5.96723	6.19127	6.59695		6.11333	6.73963	6.62759	6.68595	6.25174	6.51938	-0.434214	-0.166578	0.267636	0.0280458	0.386235	0.16571	1.55213	0.413149	0.780652	4	5	4
Tppp3	Tubulin polymerization-promoting protein family member 3	7.99336	7.85382	7.92101	8.2966	7.98059	8.70834	8.7425	8.30437	8.3406	8.02253	8.11378	7.53097	7.56222	7.45677	7.78344	8.00908	8.42367	7.68944	0.41459	-0.319641	-0.734231	0.0281327	0.0536882	0.00355539	1.55079	1.27012	2.44911	5	5	5
Clcn5	H(+)/Cl(-) exchange transporter 5	5.49887		5.23582	5.68994	5.51756	6.13775	6.18141	6.03138	5.45917	5.9413	6.07154	5.97387	5.8546	6.14548	6.82596	5.48555	5.9502	6.17429	0.464655	0.688743	0.224088	0.0282064	0.0133934	0.325372	1.54965	1.87311	0.48762	4	5	5
Rab3a	Ras-related protein Rab-3A	9.8625	10.4175	9.98067	9.74995	9.73972	9.67069	9.62186	9.5171	9.64033	9.59681	9.38092	9.50817	9.17428	9.17632	9.43546	9.95006	9.60936	9.33503	-0.340704	-0.615034	-0.274329	0.0282271	0.00253111	0.00558379	1.54933	2.59669	2.25307	5	5	5
Llgl1	Lethal(2) giant larvae protein homolog 1	7.42865	7.24517	7.6679	7.77141	7.59391	7.68167	8.11001	7.74364	7.99402	7.81319	8.05219	8.06448	7.94816	7.7294	8.12927	7.54141	7.86851	7.9847	0.327098	0.443293	0.116195	0.0282837	0.0051481	0.306157	1.54846	2.28835	0.514056	5	5	5
Gfod1	Glucose-fructose oxidoreductase domain-containing protein 1	9.1872	8.26468	8.45992	8.17035	8.59468	8.21392	8.34858	7.68129	7.38434	7.17085	8.19951	7.5772	7.55295	6.89787	7.20148	8.53537	7.7598	7.4858	-0.775569	-1.04956	-0.273996	0.0283608	0.00584465	0.410984	1.54728	2.23324	0.386175	5	5	5
Psmd12	26S proteasome non-ATPase regulatory subunit 12	8.83992	9.5277	8.73852	8.35166	8.76668	8.47765	8.40321	8.06926	8.30062	8.26483	8.41198	8.70693	8.483	7.92229	8.24131	8.8449	8.30311	8.3531	-0.541785	-0.491797	0.049988	0.0283698	0.066241	0.744847	1.54714	1.17887	0.127933	5	5	5
Mapk1	Mitogen-activated protein kinase 1	9.73297	10.3917	9.55993	9.43402	9.71258	9.31555	9.51717	9.10391	9.21501	9.29337	9.46392	9.79916	9.51361	9.1484	9.8003	9.76623	9.289	9.54508	-0.47723	-0.221155	0.256075	0.0285124	0.312713	0.102962	1.54497	0.504854	0.987323	5	5	5
Atp1b3	Sodium/potassium-transporting ATPase subunit beta-3	11.2794	11.0627	11.1174	11.2866	11.2633	11.4269	11.7645	11.4691	11.3415	11.2821	11.2772	11.0211	11.2735	11.4676	11.3863	11.2019	11.4568	11.2851	0.254947	0.0832531	-0.171694	0.0285564	0.374696	0.165316	1.5443	0.426321	0.781685	5	5	5
Psd3	PH and SEC7 domain-containing protein 3	7.11664	7.51597	7.24041	7.2913	7.36802	7.27061	7.8567	7.56583	7.75618	7.69242	7.50437	7.71653	7.50278	7.61117	7.81063	7.30647	7.62835	7.62909	0.321878	0.322625	0.000747026	0.0287919	0.00699522	0.99509	1.54073	2.1552	0.00213765	5	5	5
Smurf1	E3 ubiquitin-protein ligase SMURF1	11.9525	11.2311	12.0201	11.6034	12.1497	11.4372	11.6168	10.7583	9.91306	9.85578	12.0417	11.2476	11.1503	10.2706		11.7914	10.7162	11.1776	-1.07515	-0.613827	0.461322	0.028926	0.141185	0.408995	1.53871	0.850212	0.388282	5	5	4
Myo18a	Unconventional myosin-XVIIIa	8.73304	9.35905	8.96794	8.86718	8.70288	8.53794	8.48512	8.52853	8.75851	8.62296	9.46891	9.04652	9.35672	9.17056	9.36117	8.92602	8.58661	9.28078	-0.339408	0.354757	0.694165	0.0289992	0.0354648	5.62033e-05	1.53761	1.4502	4.25024	5	5	5
Snrpe	Small nuclear ribonucleoprotein E	7.81349		7.78669	7.4612	7.92892	7.26339	7.66134	6.78242	7.37854	6.94579	7.58537	7.67374	7.41946	7.26701	6.9182	7.74757	7.2063	7.37276	-0.541278	-0.374818	0.16646	0.0290361	0.0694847	0.441015	1.53706	1.15811	0.355546	4	5	5
Camkk2	Calcium/calmodulin-dependent protein kinase kinase 2	7.82571		8.01791	8.27077	8.50187	8.31828	8.86825	8.77072	8.66877	8.48768	8.64645	8.41666	8.64044	8.07041	8.21937	8.15407	8.62274	8.39867	0.468676	0.2446	-0.224076	0.0290497	0.223186	0.175815	1.53686	0.651333	0.754945	4	5	5
Ndufa6	NADH dehydrogenase [ubiquinone] 1 alpha subcomplex subunit 6	10.3466	9.4391	9.91323	9.28466	10.0746	10.1865	10.904	11.0254	10.1071	10.4347	9.72084	10.3316	10.0441	9.91255	10.0548	9.81163	10.5315	10.0128	0.719918	0.201163	-0.518755	0.0291428	0.390442	0.0394465	1.53547	0.408443	1.40399	5	5	5
Hspb1	Heat shock protein beta-1	6.8544		7.26952	7.03593	7.49516	7.83692	8.14119	7.40108	8.33256	7.43528	7.27813	7.27035	6.9236	7.38147	7.46754	7.16375	7.82941	7.26422	0.665653	0.100464	-0.565189	0.0291803	0.552978	0.0260591	1.53491	0.257292	1.58404	4	5	5
Ddc	Aromatic-L-amino-acid decarboxylase			4.62892	5.16192				5.92014	6.51341	5.96827	6.20836	6.42796	5.4475	5.97535	6.48184	4.89542	6.13394	6.1082	1.23853	1.21279	-0.0257415	0.029507	0.016926	0.931324	1.53007	1.77145	0.0308991	2	3	5
Uqcrc2	Cytochrome b-c1 complex subunit 2, mitochondrial	12.2022	12.3571	11.9779	11.4203	12.1211	12.1612	12.6253	12.8438	12.3854	12.7484	12.0875	12.6023	12.2202	12.3934	12.2715	12.0157	12.5528	12.315	0.537117	0.299267	-0.237849	0.0297191	0.140598	0.155826	1.52696	0.852021	0.807361	5	5	5
Vbp1	Prefoldin subunit 3	6.9309		7.48778	7.65832	7.63753	8.27233	8.15026	8.16536	7.62408	7.75745	7.82049	6.87351	7.09092	6.65215	7.21569	7.42864	7.9939	7.13055	0.565263	-0.298083	-0.863346	0.0297535	0.304784	0.00626467	1.52646	0.516008	2.2031	4	5	5
Tns1;Tns3;Tns2	Tensin-1;Tensin-3;Tensin-2	8.33839		8.17008	8.02607	8.06333	8.13805	7.86587	7.37605	7.41813	7.57944	8.05611	7.65523	7.71131	7.52429	7.30256	8.14947	7.67551	7.6499	-0.473959	-0.499567	-0.0256082	0.0299861	0.0137536	0.896012	1.52308	1.86158	0.0476862	4	5	5
Myl3	Myosin light chain 3	9.62762	9.81717	9.8284	9.65387	9.5898	9.37228	9.69505	9.04413	9.52612	9.29396	10.1534	9.60041	10.0965	10.1443	9.96002	9.70337	9.38631	9.99093	-0.317064	0.287559	0.604623	0.0301089	0.03683	0.00390772	1.5213	1.4338	2.40808	5	5	5
Hk1	Hexokinase-1	10.4641	11.1504	10.0566	9.67529	10.6514	10.7147	11.5475	11.7091	10.834	11.4041	10.9289	11.1602	10.8688	11.201	11.1755	10.3996	11.2419	11.0669	0.842309	0.667316	-0.174993	0.030308	0.0342055	0.428095	1.51844	1.4659	0.36846	5	5	5
Uqcrq	Cytochrome b-c1 complex subunit 8	8.85441	8.87348	8.79136	8.25872	8.84227	8.82765	9.22811	9.49354	8.94697	9.3968	8.49411	9.23467	8.48098	8.80851	8.7341	8.72405	9.17861	8.75047	0.454563	0.0264245	-0.428139	0.0304841	0.887161	0.0517125	1.51593	0.0519977	1.2864	5	5	5
Tubb6	Tubulin beta-6 chain	13.137	12.9591	13.1162	12.5441	12.6715	13.1991	13.1546	13.0665	13.4565	13.6244	13.5975	13.9653	13.4596	13.2581	13.3862	12.8856	13.3002	13.5333	0.414662	0.647788	0.233126	0.0305134	0.0051559	0.182129	1.51551	2.2877	0.739621	5	5	5
Hspa9	Stress-70 protein, mitochondrial	8.02749	9.31431	8.00248	7.79923	8.08088	8.6777	9.0832	9.30064	8.93429	9.01969	8.17444	8.37288	8.15057	8.10375	8.28676	8.24488	9.0031	8.21768	0.758224	-0.0271978	-0.785422	0.0308739	0.923922	0.000116207	1.51041	0.0343645	3.93477	5	5	5
Rheb	GTP-binding protein Rheb	9.57809	10.1564	9.36573	9.24033	9.31166	9.23712	8.76155	8.65471	9.14458	9.17782	9.40997	9.72836	9.27773	9.19024	9.55983	9.53045	8.99516	9.43323	-0.535293	-0.0972211	0.438072	0.0308868	0.62693	0.0213872	1.51023	0.202781	1.66985	5	5	5
Sorcs2	VPS10 domain-containing receptor SorCS2	10.2852	10.4722	9.97217	10.1145	10.2116	10.0336	10.0715	10.0097	9.81351	9.77173	10.0086	9.74424	9.92292	10.428	10.7428	10.2111	9.94002	10.1693	-0.271113	-0.0418159	0.229297	0.0309975	0.839923	0.266886	1.50867	0.0757605	0.573674	5	5	5
Yars1	Tyrosine--tRNA ligase, cytoplasmic	5.65651		6.39614	6.69614	6.22464	6.52426	6.81089	6.84345	7.26266	6.92971	6.18053	6.44838	6.18973	6.35574	7.00279	6.24336	6.8742	6.43543	0.630839	0.192079	-0.438761	0.0310147	0.479059	0.0513834	1.50843	0.319611	1.28918	4	5	5
Abcf1	ATP-binding cassette sub-family F member 1	7.61343	7.82882	7.98756	8.05098	8.19555	8.14119	8.41661	8.09417	8.57787	8.2093	8.30327	8.49315	8.32327	7.88974	7.93592	7.93527	8.28783	8.18907	0.352563	0.253801	-0.0987626	0.031082	0.138551	0.525642	1.50749	0.85839	0.27931	5	5	5
Znf365	Protein ZNF365	6.24702		6.25995	6.63403			7.68794	6.91706	7.34708	6.76717	7.24792	7.22895	7.1759	7.45241	7.86937	6.38033	7.17981	7.39491	0.799478	1.01457	0.215094	0.0312448	0.00194313	0.388368	1.50522	2.7115	0.410757	3	4	5
Cadm1	Cell adhesion molecule 1	8.30435	9.36713	8.74886	9.11787	9.04166	9.02676	9.31621	9.90346	10.0387	9.68949	8.65853	8.1822	8.53005	8.64763	8.20426	8.91597	9.59493	8.44453	0.678954	-0.47144	-1.15039	0.0316113	0.0551097	0.000680541	1.50016	1.25877	3.16715	5	5	5
Jakmip2	Janus kinase and microtubule interacting protein 2	9.14144	9.67669	9.03865	8.66288	9.07941	8.6765	8.82259	7.84928	8.55957	8.63416	9.17096	9.42042	9.16206	9.10578	9.19883	9.11981	8.50842	9.21161	-0.611391	0.091797	0.703188	0.0317055	0.606547	0.00433055	1.49887	0.217135	2.36346	5	5	5
Sf3a3	Splicing factor 3A subunit 3	7.30021		7.27151	7.0407	6.99805	6.95293	6.73031	6.44081	7.07095	6.63912	7.14709	6.8972	6.75766	6.52953	6.79937	7.15262	6.76682	6.82617	-0.385793	-0.326448	0.0593459	0.0317379	0.0434214	0.703487	1.49842	1.3623	0.152744	4	5	5
Hnrnpd	Heterogeneous nuclear ribonucleoprotein D0	7.41208	7.67362	7.86513	7.46736	7.61763	7.20056	6.50222	6.92681	7.43738	7.44224	7.75279	8.43306	8.09114	7.16832	7.47355	7.60717	7.10184	7.78377	-0.505325	0.176607	0.681932	0.0317508	0.476974	0.0434627	1.49825	0.321505	1.36188	5	5	5
Pde9a	High affinity cGMP-specific 3',5'-cyclic phosphodiesterase 9A			6.16117	6.46738		6.76769	6.70071	6.60351	6.75098	6.49214	6.07603	6.60303	6.42559	6.91375	7.12188	6.31428	6.66301	6.62805	0.348727	0.313777	-0.03495	0.0318428	0.367995	0.858891	1.49699	0.434158	0.066062	2	5	5
Dpy19l3	Probable C-mannosyltransferase DPY19L3	7.66391		7.63281	7.4963	7.77863	7.61877	8.07008	8.07418	8.08838	7.88884	7.97823	8.16825	8.3527	8.80881	9.4815	7.64291	7.94805	8.5579	0.30514	0.914984	0.609845	0.0319126	0.0211058	0.0637248	1.49604	1.6756	1.19569	4	5	5
Sorbs2	Sorbin and SH3 domain-containing protein 2	8.00891	7.82249	8.2015	7.97635	8.09561	7.77052	7.06704	7.65844	7.90305	7.67138	8.7447	8.53265	8.71292	8.21373	8.18333	8.02097	7.61409	8.47747	-0.406884	0.456494	0.863377	0.0319266	0.00969817	0.00171003	1.49585	2.01331	2.767	5	5	5
Lmbrd2	G-protein coupled receptor-associated protein LMBRD2	7.15078	7.91645	7.07079	7.08393	7.14792	6.8463	7.08722	6.72174	6.73257	6.68282	7.1175	6.871	7.12365	7.09295	7.05101	7.27397	6.81413	7.05122	-0.459843	-0.222753	0.23709	0.0319933	0.221706	0.0262298	1.49494	0.654223	1.5812	5	5	5
Tuft1	Tuftelin			7.32468	7.28277	7.90842		8.82779		8.76828	8.04486						7.50529	8.54697	#DIV/0!	1.04169	#DIV/0!	#DIV/0!	0.0320192	#DIV/0!	#DIV/0!	1.49459	#DIV/0!	#DIV/0!	3	3	0
Ndufs6	NADH dehydrogenase [ubiquinone] iron-sulfur protein 6, mitochondrial	10.1785	9.30598	10.1403	9.57932	10.0018	9.91415	10.3118	11.0296	10.5515	10.6547	10.05	10.3632	10.2093	10.05	10.2993	9.84117	10.4924	10.1944	0.651196	0.353209	-0.297987	0.0323759	0.088834	0.166553	1.48978	1.05142	0.778447	5	5	5
Tmem161b	Transmembrane protein 161B	7.44308		6.94751	6.86865		7.8834		7.87708	7.69377	7.35534	7.57603	7.40083	7.70412	7.36713	7.04834	7.08641	7.7024	7.41929	0.615982	0.332878	-0.283105	0.0324706	0.143434	0.132458	1.48851	0.843348	0.877922	3	4	5
Ephb2	Ephrin type-B receptor 2	6.88989	7.31079	6.96918	7.03682	6.96401	7.29639	7.21891	7.08239	7.41381	7.36595	7.2178	6.8849	7.01563	7.47257	7.08712	7.03414	7.27549	7.1356	0.241349	0.101464	-0.139885	0.0325086	0.436086	0.261506	1.488	0.360428	0.582518	5	5	5
Camk2b	Calcium/calmodulin-dependent protein kinase type II subunit beta	10.2098	10.6516	10.2019	10.3803	10.6337	10.0491	9.87767	10.2917	10.0825	10.2113	10.5956	10.45	10.4292	10.2339	10.1847	10.4155	10.1025	10.3787	-0.313013	-0.0367832	0.27623	0.0325271	0.773692	0.0285491	1.48775	0.111432	1.54441	5	5	5
Selenoi	Ethanolaminephosphotransferase 1	9.66948	9.3478	8.69093	8.67765	8.9358	9.31622	8.08118	7.69634	7.90781	7.55308	7.85428	7.92916	7.55612	8.26916	8.12436	9.06433	8.11093	7.94662	-0.953408	-1.11772	-0.164308	0.0325882	0.00122363	0.639197	1.48694	2.91235	0.194366	5	5	5
Kif1b	Kinesin-like protein KIF1B			5.36695	5.06675				6.01776	6.6773	6.15411	5.78292	6.8206	6.69247	6.32436	6.63732	5.21685	6.28305	6.45154	1.0662	1.23468	0.168481	0.0326008	0.0120789	0.580121	1.48677	1.91797	0.236482	2	3	5
Dhodh	Dihydroorotate dehydrogenase (quinone), mitochondrial	5.76897	6.61695	5.7753	5.25695	5.75344	6.17134	6.62009	6.97809	6.21792	6.58984	5.86745	6.48479	6.07259	6.16191	6.06438	5.83432	6.51546	6.13022	0.681133	0.295902	-0.385231	0.0327866	0.254784	0.0635737	1.4843	0.593828	1.19672	5	5	5
Nptn	Neuroplastin	13.5719	13.7827	13.7149	14.0266	13.9383	13.5178	13.5921	13.6349	13.6672	13.5121	13.4059	13.5599	13.6491	13.9003	13.7677	13.8069	13.5848	13.6566	-0.22206	-0.150326	0.0717332	0.0329621	0.234839	0.449934	1.48198	0.629231	0.346851	5	5	5
Abhd12	Lysophosphatidylserine lipase ABHD12	10.7599	11.0194	10.7522	10.5572	10.6518	10.6291	11.2726	11.2671	11.4182	11.1703	10.6172	11.1203	11.2618	11.6212	11.7864	10.7481	11.1514	11.2814	0.403342	0.533277	0.129935	0.0330382	0.0407433	0.611726	1.48098	1.38994	0.213443	5	5	5
Nme2	Nucleoside diphosphate kinase B	9.0758	7.41143	9.06234	9.56494	9.09498	9.77601	10.1602	9.7286	9.70955	9.71683	9.34279	9.29774	9.37609	9.37204	9.95455	8.8419	9.81823	9.46864	0.976337	0.626746	-0.349592	0.0330997	0.146332	0.0477051	1.48018	0.83466	1.32144	5	5	5
Iars2	Isoleucine--tRNA ligase, mitochondrial	7.04719		6.75868	6.47978	6.9862	6.88635	7.30927	7.25962	7.33056	7.23152	6.59152	7.64454	6.8675	7.14355	7.07174	6.81796	7.20346	7.06377	0.3855	0.245806	-0.139695	0.0332103	0.315444	0.487571	1.47873	0.501078	0.311962	4	5	5
Stard7	StAR-related lipid transfer protein 7, mitochondrial	8.20541	8.57453	8.1558	7.64939	7.93841	7.77448	7.07056	7.4318	7.51613	7.96105	7.85255	8.77802	8.05048	7.53337	8.04545	8.10471	7.5508	8.05197	-0.553903	-0.0527333	0.50117	0.0333954	0.841566	0.0849239	1.47631	0.074912	1.07097	5	5	5
Arfrp1	ADP-ribosylation factor-related protein 1	5.90843		4.8608	5.14294	5.05933	4.9917		4.29954	4.23256	3.98225	4.53848	4.66032	4.5919	4.50908	4.97801	5.24287	4.37651	4.65556	-0.866361	-0.587313	0.279048	0.0334022	0.0339211	0.230931	1.47623	1.46953	0.636519	4	4	5
Cltc	Clathrin heavy chain 1	12.2031	12.8762	12.9832	12.1577	12.9454	12.3306	12.0919	11.8544	12.0402	12.2426	12.8095	13.356	12.6271	11.9952	12.1729	12.6331	12.1119	12.5921	-0.521168	-0.0409557	0.480213	0.0334793	0.89632	0.0964635	1.47522	0.047537	1.01564	5	5	5
Iqsec2	IQ motif and SEC7 domain-containing protein 2	8.47102	9.74262	8.40153	8.30591	8.66758	8.08474	8.15455	8.02297	7.93833	7.98433	8.28101	8.39289	8.4375	8.1045	8.19023	8.71773	8.03699	8.28123	-0.680747	-0.436506	0.244242	0.0335492	0.14482	0.00982076	1.47432	0.83917	2.00786	5	5	5
Hdac11	Histone deacetylase 11	9.86429	9.91394	9.74968	9.74292	9.78638	9.9749	9.96937	9.94442	9.79746	10.007	10.0921	9.8742	9.98503	9.86285	9.97243	9.81144	9.93862	9.95732	0.127179	0.145875	0.0186962	0.0336014	0.0261522	0.745425	1.47364	1.58249	0.127596	5	5	5
Prkag2	5'-AMP-activated protein kinase subunit gamma-2	9.62533	8.87751	8.70709	8.42602	8.84252	8.7078	8.56529	7.86016	7.954	8.02014	8.62609	7.95673	8.40384	7.22991	8.61605	8.89569	8.22148	8.16652	-0.674217	-0.729169	-0.054952	0.033734	0.058326	0.865969	1.47193	1.23414	0.0624978	5	5	5
Fam174a	Membrane protein FAM174A	7.69221	8.27235	7.71398	7.94383	7.23557	7.25632	7.06436	6.34509	7.42454	7.41383	7.40574	7.23145	6.99952	6.57938	6.67343	7.77159	7.10083	6.9779	-0.670762	-0.793684	-0.122922	0.0338288	0.00907804	0.64246	1.47071	2.04201	0.192154	5	5	5
Usp47	Ubiquitin carboxyl-terminal hydrolase 47	6.39082		6.64884	6.32736	6.31027			6.70149	7.88511	7.28332	6.67621	6.35381	6.97055			6.41932	7.28997	6.66686	0.870648	0.247533	-0.623115	0.0339245	0.217596	0.181163	1.46949	0.662349	0.741931	4	3	3
Fam171a2	Protein FAM171A2	7.261	7.2509	6.50516	6.65315	7.20735	7.61649	7.74416	7.33896	7.44856	7.17858	7.31412	7.17121	7.31192	7.5714	7.49647	6.97551	7.46535	7.37302	0.489838	0.397508	-0.0923299	0.0339287	0.0568011	0.473669	1.46943	1.24564	0.324525	5	5	5
Rab5b	Ras-related protein Rab-5B	9.9546	10.2122	9.79161	9.61041	10.0112	9.7698	9.36905	9.65628	9.68728	9.51985	9.94001	9.95822	9.71641	9.65474	9.86248	9.916	9.60045	9.82637	-0.315553	-0.089635	0.225917	0.0342294	0.470656	0.0410478	1.4656	0.327296	1.38671	5	5	5
Eno2	Gamma-enolase	8.74287	9.94771	8.73109	9.55329	8.60618	9.69355	9.56918	9.96826	9.94289	9.97198	9.18282	8.75262	8.90739	9.2646	9.49841	9.11623	9.82917	9.12117	0.712943	0.0049414	-0.708001	0.0344163	0.987185	0.00190476	1.46324	0.00560149	2.72016	5	5	5
Akr1a1	Aldo-keto reductase family 1 member A1	7.40033		7.66827	7.96738	7.57275	7.72488	8.27911	8.02625	8.53989	8.11793	7.75257	7.65638	7.22716	7.0725	7.96972	7.65218	8.13761	7.53566	0.485431	-0.116516	-0.601947	0.0344499	0.607119	0.0232173	1.46281	0.216726	1.63419	4	5	5
M6pr	Cation-dependent mannose-6-phosphate receptor	10.1263	10.2404	9.69057	9.87676	9.98765	9.69764	9.93333	9.70819	9.44706	9.40279	9.92429	9.74099	9.91242	9.66532	9.90657	9.98433	9.6378	9.82992	-0.346527	-0.154413	0.192114	0.0344938	0.196476	0.12022	1.46226	0.70669	0.920025	5	5	5
Pcsk2	Neuroendocrine convertase 2	7.60006	7.91743	7.58596	7.34216	7.70862	7.86508	8.24587	7.78358	7.86511	7.95619	7.97383	7.70442	7.76076	8.08073	8.05635	7.63085	7.94316	7.91522	0.312319	0.284373	-0.0279463	0.0350648	0.0468737	0.808356	1.45513	1.32907	0.0923974	5	5	5
Ndufb10	NADH dehydrogenase [ubiquinone] 1 beta subcomplex subunit 10	11.7285	11.697	11.7271	10.9902	11.7099	11.6123	11.9302	12.4123	12.1798	12.2916	11.3019	12.0647	11.5651	11.7331	11.8007	11.5705	12.0852	11.6931	0.514702	0.122552	-0.392151	0.0352648	0.542499	0.0737042	1.45266	0.265601	1.13251	5	5	5
Alpl	Alkaline phosphatase, tissue-nonspecific isozyme	9.22021	10.1585	9.3547	9.12023	9.07688	8.99067	8.82164	8.32543	8.85579	8.98483	8.97278	8.97898	8.56884	8.95913	9.09015	9.3861	8.79567	8.91398	-0.590427	-0.472122	0.118305	0.0353418	0.0623192	0.457372	1.45171	1.20538	0.339731	5	5	5
RtcA	RNA 3'-terminal phosphate cyclase	8.7113	9.1885	8.45371	8.21774	8.82167	8.30259	8.44569	7.98267	8.26738	8.04753	8.2043	8.48648	8.22266	8.03689	8.66189	8.67858	8.20917	8.32245	-0.469415	-0.356138	0.113277	0.0354064	0.111316	0.442444	1.45092	0.953443	0.354142	5	5	5
Pvalb	Parvalbumin alpha	5.32183		6.75666	7.19941	6.52449	7.31786	7.7693	7.03889	7.67614	7.41011	7.26514	6.43236	6.70825	6.97128	7.31874	6.4506	7.44246	6.93916	0.991863	0.488559	-0.503303	0.0357515	0.262046	0.0452867	1.44671	0.581623	1.34403	4	5	5
Ckb	Creatine kinase B-type	12.4022	12.7464	12.7139	12.8352	12.074	13.09	12.7733	12.8148	13.1295	12.9487	12.4906	12.2388	12.2306	12.2299	13.0306	12.5543	12.9512	12.4441	0.396926	-0.110215	-0.507141	0.0358423	0.612503	0.0177258	1.4456	0.212892	1.75139	5	5	5
Psmb5	Proteasome subunit beta type-5	8.28308	7.80779	8.295	8.62035	8.9549	8.85574	9.82651	9.03534	8.8726	8.78448	8.28602	8.42976	7.97519	8.57665	9.06167	8.39222	9.07493	8.46586	0.682711	0.0736339	-0.609077	0.0359731	0.785835	0.049111	1.44402	0.104668	1.30882	5	5	5
Ppib	Peptidyl-prolyl cis-trans isomerase B	8.04508		7.7461	7.53325	7.6167	7.93108	8.36864	8.17595	8.0787	7.90581	7.77695	7.65586	7.79811	7.95721	7.91214	7.73528	8.09204	7.82005	0.356751	0.0847665	-0.271984	0.0359801	0.486896	0.026506	1.44394	0.312564	1.57666	4	5	5
Micu1	Calcium uptake protein 1, mitochondrial	6.80036		6.92405	6.03154	6.59523	6.95281	7.4093	7.48377	6.82922	7.17171	6.7237	6.78004	5.74583	6.91482	6.61228	6.58779	7.16936	6.55533	0.581568	-0.0324618	-0.61403	0.0361554	0.914857	0.0357027	1.44183	0.0386467	1.4473	4	5	5
Prdx3	Thioredoxin-dependent peroxide reductase, mitochondrial	7.11077		6.53304	6.22965	7.1889	7.48442	8.00706	7.73643	7.09724	7.14864	6.78414	7.09165	6.69264	6.61983	6.67858	6.76559	7.49476	6.77337	0.729168	0.00778002	-0.721388	0.0362466	0.973257	0.00560686	1.44073	0.0117727	2.25128	4	5	5
Dipk1b	Divergent protein kinase domain 1B	8.93198	9.27184	8.80336	8.61254	8.72089	8.59622	8.681	8.47274	8.60154	8.47686	8.49368	8.42289	8.43561	9.04976	9.36663	8.86812	8.56567	8.75371	-0.30245	-0.11441	0.18804	0.0363498	0.622682	0.367013	1.4395	0.205733	0.435319	5	5	5
Ywhag	14-3-3 protein gamma	10.5476	11.1417	10.6436	10.8745	10.4771	11.0241	10.9289	11.1727	11.117	11.0524	10.6116	10.6749	10.2141	10.4923	10.8846	10.7369	11.059	10.5755	0.32211	-0.161414	-0.483524	0.0363519	0.354299	0.00345769	1.43947	0.45063	2.46121	5	5	5
Atl2	Atlastin-2	7.07342		7.31286	6.80863	6.85621	7.25713	7.24497	7.30255	7.84809	7.5606	7.29412	7.82994	7.6875	7.79274	8.40619	7.01278	7.44267	7.8021	0.429885	0.789319	0.359434	0.0363871	0.0101646	0.130173	1.43905	1.99291	0.88548	4	5	5
Rapgef5	Rap guanine nucleotide exchange factor 5	7.63961		7.05972	6.96983	7.26575	6.99084	7.00375	6.38317	6.69297	6.19098	6.67421	6.88836	6.59834	6.24448	6.54238	7.23373	6.65234	6.58955	-0.581385	-0.644173	-0.0627884	0.0365426	0.0081373	0.752939	1.4372	2.08952	0.12324	4	5	5
Stx17	Syntaxin-17	4.0106		3.81356	4.20872	4.07538	4.0628	4.83948	4.31171	5.22399	5.0055	5.20617	5.92975	6.2465	6.41527	7.02009	4.02706	4.6887	6.16355	0.661631	2.13649	1.47486	0.0365858	0.000451968	0.00394837	1.43669	3.34489	2.40358	4	5	5
Get4	Golgi to ER traffic protein 4 homolog	7.26169		7.20012	6.78767	7.29993	6.95243	7.014	6.61584	6.52913	6.51943	6.64859	6.97012	6.57207	6.5715	6.49814	7.13735	6.72616	6.65208	-0.411188	-0.48527	-0.0740818	0.0366066	0.0105379	0.598658	1.43644	1.97725	0.222821	4	5	5
Cyb5a	Cytochrome b5	7.43975		7.04603	6.79425	7.3257	7.5173	7.3861	7.74929	7.63372	7.3996	7.2729	7.01795	7.23891	7.33292	7.58495	7.15143	7.5372	7.28953	0.385766	0.138096	-0.247671	0.0366436	0.427353	0.0624916	1.436	0.369213	1.20418	4	5	5
Pck2;Pck1	Phosphoenolpyruvate carboxykinase [GTP], mitochondrial;Phosphoenolpyruvate carboxykinase, cytosolic [GTP]			3.67642	2.5922	4.18744		6.01875	4.0359	5.67035	5.64585	4.70003	6.17175	4.33998	3.50557	5.05031	3.48535	5.34271	4.75353	1.85736	1.26818	-0.589184	0.0366599	0.110231	0.381564	1.43581	0.957697	0.418433	3	4	5
Ppp1r1b	Protein phosphatase 1 regulatory subunit 1B			6.18859	7.03415	7.17323	7.36432		8.78541	8.01122	7.91403	6.96204	6.85613	6.39808	7.01154	7.59508	6.79865	8.01875	6.96457	1.22009	0.165918	-1.05418	0.0367447	0.642856	0.0165067	1.43481	0.191886	1.78234	3	4	5
Cd22	B-cell receptor CD22	5.18151		3.83033	4.54822		5.81484		5.54826	6.16092		5.02	5.48918	5.50003	6.23002	7.13887	4.52002	5.84134	5.87562	1.32132	1.3556	0.0342837	0.0368576	0.0549669	0.948645	1.43347	1.2599	0.0228963	3	3	5
Ndufb8	NADH dehydrogenase [ubiquinone] 1 beta subcomplex subunit 8, mitochondrial	10.2768	9.23749	10.0495	9.49556	9.96352	10.1823	10.3145	10.5541	10.0855	10.5407	9.95474	10.4143	10.0133	10.1348	10.5113	9.80456	10.3354	10.2057	0.530864	0.401129	-0.129735	0.0369274	0.105598	0.395853	1.43265	0.976346	0.402466	5	5	5
Epb41l4b	Band 4.1-like protein 4B	5.9681		5.9909	6.09962	6.40995		7.13258	6.30331	6.65606	6.53346	5.87258	6.49098	5.94076	5.91293	6.97651	6.11714	6.65635	6.23875	0.53921	0.121609	-0.417601	0.037204	0.655634	0.192338	1.42941	0.183339	0.715935	4	4	5
Stk3;Stk4	Serine/threonine-protein kinase 3;Serine/threonine-protein kinase 4	5.84702		5.55691	5.31387	5.90969	5.79551	6.8124	6.14808	6.40777	6.06239	5.75185	6.37496	5.97949	6.31766		5.65687	6.24523	6.10599	0.588356	0.449117	-0.13924	0.037491	0.0671687	0.570548	1.42607	1.17283	0.243707	4	5	4
Atad1	Outer mitochondrial transmembrane helix translocase	8.15877		8.19496	8.22404	8.62388	8.48659	8.98864	8.92113	8.80278	8.39952	8.00047	7.9776	8.02561	7.89621	7.56135	8.30041	8.71973	7.89225	0.419323	-0.408161	-0.827484	0.0377117	0.0199419	0.000459532	1.42352	1.70023	3.33768	4	5	5
Psma6	Proteasome subunit alpha type-6	8.6354	9.16732	8.53973	8.78191	9.2059	9.17595	10.1196	9.25195	9.29578	9.25665	8.86515	8.8087	8.70536	8.92969	9.16742	8.86605	9.41999	8.89527	0.55394	0.0292139	-0.524727	0.0377136	0.856982	0.0258638	1.4235	0.0670281	1.58731	5	5	5
Cox6c	Cytochrome c oxidase subunit 6C	11.1055	9.91704	11.0892	10.4864	11.0457	10.9596	11.3776	11.7882	11.3081	11.5913	11.1626	11.3114	11.1777	11.1568	11.1387	10.7288	11.4049	11.1894	0.676181	0.460661	-0.21552	0.037775	0.0861884	0.170426	1.4228	1.06455	0.768463	5	5	5
Grhpr	Glyoxylate reductase/hydroxypyruvate reductase	7.22428		7.10878	7.80135	7.58774	7.66355	7.92535	7.72317	7.98629	7.85417	7.93759	7.66536	7.69704	7.88182	8.41398	7.43054	7.83051	7.91916	0.399969	0.488621	0.088652	0.0378815	0.0505775	0.563767	1.42157	1.29604	0.2489	4	5	5
Sec23ip	SEC23-interacting protein			7.76989	7.44098	7.63865		8.77771	7.88892	8.33977	8.12233	8.33714	8.69849	8.23811	8.147	8.25141	7.61651	8.28218	8.33443	0.665672	0.717921	0.0522497	0.0379204	0.00263311	0.799957	1.42113	2.57953	0.0969332	3	4	5
Gnptab	N-acetylglucosamine-1-phosphotransferase subunits alpha/beta	7.639		7.1306	7.2084	7.2225	7.05509	6.79173	6.98306	7.17567	6.70111	7.3	6.72363	7.09655	6.99871	7.54492	7.30012	6.94133	7.13276	-0.358792	-0.167361	0.191431	0.0380444	0.399935	0.275173	1.41971	0.39801	0.560394	4	5	5
Syngap1	Ras/Rap GTPase-activating protein SynGAP	9.10003	9.65189	8.8537	9.0625	9.06728	8.66231	8.74555	8.74925	8.91828	8.89864	9.20622	9.21278	9.25696	9.09052	9.15445	9.14708	8.79481	9.18419	-0.352274	0.0371041	0.389379	0.0383276	0.792709	0.000128989	1.41649	0.100886	3.88945	5	5	5
Crmp1	Dihydropyrimidinase-related protein 1	10.3069	11.2115	10.2783	10.575	10.3703	10.935	11.3117	11.151	10.8472	10.901	10.3437	10.449	10.2666	10.2059	10.2754	10.5484	11.0292	10.3081	0.480767	-0.240274	-0.721041	0.038583	0.215321	7.28132e-05	1.4136	0.666913	4.13779	5	5	5
Galk1	Galactokinase	7.9581	7.6439	7.56651	7.61657	7.35789	8.137	7.83717	7.72369	7.88894	8.08263	7.66514	8.16687	7.60243	7.77996	8.46744	7.62859	7.93389	7.93637	0.305292	0.307773	0.00248044	0.0385857	0.146049	0.989469	1.41357	0.835503	0.00459773	5	5	5
Ndufa4	Cytochrome c oxidase subunit NDUFA4	9.52598	11.351	9.14356	8.69607	9.77378	10.3032	11.5527	11.5347	10.6954	10.7654	9.15008	9.49592	9.096	9.53189	9.54992	9.69809	10.9703	9.36476	1.27219	-0.333323	-1.60551	0.038623	0.491553	0.000312966	1.41315	0.30843	3.5045	5	5	5
Robo1	Roundabout homolog 1	5.61031		6.38732	6.48841	5.88709	6.21714	6.84208	6.59687	6.96164	6.86024	6.63555	6.4335	6.54937	6.65384	6.67553	6.09328	6.69559	6.58956	0.602313	0.496279	-0.106034	0.0388002	0.0343901	0.473583	1.41117	1.46357	0.324604	4	5	5
Gsr	Glutathione reductase, mitochondrial	6.38001		6.45802	6.89861	6.76223	7.34763	6.62915	7.15336	7.05408	7.54271	6.7459	6.81267	6.43401	7.31113	7.18527	6.62472	7.14539	6.8978	0.520669	0.273078	-0.247591	0.0388424	0.232953	0.294101	1.41069	0.632731	0.531504	4	5	5
Clvs2	Clavesin-2	7.25292	8.31632	7.53695	7.14296	7.54973	7.19969	6.84578	6.75661	7.19641	7.04001	7.51111	7.447	7.37208	6.67743	6.78635	7.55978	7.0077	7.15879	-0.552076	-0.40098	0.151095	0.0390465	0.176602	0.467798	1.40842	0.753004	0.329942	5	5	5
Stx16	Syntaxin-16	8.08553	8.75105	7.53636	8.13607	7.97716	7.67166	7.93033	7.2804	7.39139	7.41369	7.84186	7.48117	7.59229	7.82293	8.11661	8.09723	7.53749	7.77097	-0.559739	-0.326263	0.233477	0.0391557	0.182898	0.184975	1.40721	0.737792	0.732887	5	5	5
Aimp1	Aminoacyl tRNA synthase complex-interacting multifunctional protein 1	7.33239		7.55026	7.37035	7.23943	7.95712	7.38474	7.73866	8.47147	7.9459	7.43706	8.14626	7.40753	7.15311	7.49672	7.37311	7.89958	7.52814	0.52647	0.155026	-0.371444	0.03932	0.454891	0.163159	1.40539	0.342092	0.787388	4	5	5
Kras	GTPase KRas	7.91739		8.29877	8.23597	7.99665	8.44224	8.24768	8.25761	8.7408	8.54944	8.62779	8.68334	8.66051	8.5775	8.91123	8.11219	8.44755	8.69207	0.335361	0.57988	0.244519	0.0393752	0.000830225	0.0556153	1.40478	3.0808	1.25481	4	5	5
Cacnb4	Voltage-dependent L-type calcium channel subunit beta-4	8.27502	8.85151	7.93443	8.05426	8.24327	7.77807	7.93311	7.97686	7.93188	7.67711	8.11998	8.12079	8.17393	8.48697	8.37069	8.2717	7.8594	8.25448	-0.412293	-0.017222	0.395071	0.0393953	0.923749	0.00287034	1.40456	0.0344458	2.54207	5	5	5
Hnrnpa0	Heterogeneous nuclear ribonucleoprotein A0	7.94552	7.6869	7.7606	7.65158	7.74813	7.50133	7.83673	7.45586	7.2994	7.43679	8.1206	8.10225	8.01083	7.60197	7.83831	7.75855	7.50602	7.93479	-0.252526	0.176244	0.428769	0.0394217	0.146366	0.0116778	1.40426	0.83456	1.93264	5	5	5
Ccz1	Vacuolar fusion protein CCZ1 homolog	7.77008	8.08124	7.39817	7.27448	7.55733	7.41046	7.32231	7.15846	7.21889	7.06947	7.34713	7.53038	7.31619	7.21424	7.53195	7.61626	7.23592	7.38798	-0.380342	-0.22828	0.152061	0.0395632	0.18113	0.117119	1.40271	0.742011	0.931372	5	5	5
Cul9	Cullin-9	10.9813	11.0436	10.858	10.6621	11.0126	10.5498	10.5476	10.2791	10.898	10.7427	10.805	11.1453	11.1128	10.8159	11.3155	10.9115	10.6034	11.0389	-0.308091	0.127408	0.435499	0.0396384	0.32508	0.0164862	1.40188	0.48801	1.78288	5	5	5
Impdh1	Inosine-5'-monophosphate dehydrogenase 1			4.09397	2.75782			4.77032	4.46959	4.75933	4.83637	5.25191	5.47031	4.9596	4.21421	4.75521	3.4259	4.7089	4.93025	1.283	1.50435	0.221345	0.0397613	0.0311409	0.415827	1.40054	1.50667	0.381087	2	4	5
Ywhaz	14-3-3 protein zeta/delta	11.0451	11.7264	11.4229	11.9084	11.4402	11.6521	12.0758	11.7908	12.1419	12.0126	11.1841	11.5844	11.1473	11.4835	11.9925	11.5086	11.9346	11.4783	0.426045	-0.0302521	-0.456298	0.0397844	0.890479	0.0342709	1.40029	0.0503765	1.46507	5	5	5
Tex10	Testis-expressed protein 10	7.0908		6.48936	6.44837	6.92243	5.64956	6.93686	5.73906	5.76154	5.42411	6.03398	6.06275	5.96457	6.57237	7.18056	6.73774	5.90223	6.36285	-0.835515	-0.374895	0.46062	0.0399615	0.247501	0.227071	1.39836	0.606423	0.643839	4	5	5
Mmut	Methylmalonyl-CoA mutase, mitochondrial	6.49507		6.38241	6.12887	6.25339	6.78878	6.29417	6.58687	6.69796	6.81647	6.16819	6.81787	6.12485	7.14151		6.31493	6.63685	6.5631	0.321916	0.248168	-0.0737482	0.0399764	0.379879	0.771292	1.3982	0.420355	0.112781	4	5	4
Sptan1	Spectrin alpha chain, non-erythrocytic 1	9.43524	10.2029	9.58355	9.47464	9.66555	9.22912	9.34621	9.31291	9.39887	9.34246	9.52094	9.69727	9.56405	9.38885	9.59	9.67238	9.32592	9.55222	-0.346468	-0.120161	0.226307	0.0400032	0.438807	0.00426678	1.39791	0.357726	2.3699	5	5	5
Ndufs8	NADH dehydrogenase [ubiquinone] iron-sulfur protein 8, mitochondrial	10.3357	10.1967	10.2283	9.60758	10.4289	10.3187	10.9502	11.0687	10.361	10.6456	9.81193	10.3395	9.8008	9.98314	9.94376	10.1594	10.6688	9.97582	0.5094	-0.183616	-0.693016	0.0405327	0.321988	0.00487275	1.39219	0.49216	2.31223	5	5	5
Alg10b	Putative Dol-P-Glc:Glc(2)Man(9)GlcNAc(2)-PP-Dol alpha-1,2-glucosyltransferase	5.69855		6.91173	7.18195	6.49934	8.6698	7.84622	6.90927	7.84822	7.19616	6.29484	7.80871	7.82703	8.36041	9.16528	6.57289	7.69393	7.89125	1.12104	1.31836	0.197321	0.0407667	0.0650714	0.73354	1.38969	1.18661	0.134576	4	5	5
Apoe	Apolipoprotein E	8.8677	9.48148	8.66858	8.63877	8.83205	9.36364	9.19949	9.52562	9.43038	9.07338	8.6337	8.65532	8.44601	8.73131	9.11987	8.89771	9.3185	8.71724	0.420786	-0.180474	-0.60126	0.0408822	0.366897	0.00237643	1.38847	0.435455	2.62407	5	5	5
Cpsf3	Cleavage and polyadenylation specificity factor subunit 3	6.42171		6.51718	6.60692	7.50399	6.89729	7.90747	8.41769	7.54565	7.52623	6.87335	7.28787	6.82579		6.92554	6.76245	7.65887	6.97814	0.896418	0.215688	-0.68073	0.0409309	0.456885	0.0562422	1.38795	0.340193	1.24994	4	5	4
Plscr3	Phospholipid scramblase 3	9.47502	9.90697	9.31574	9.73304	9.56656	8.97465	9.66766	9.07819	9.20093	9.16512	9.74556	9.6142	9.46233	10.2224	9.65275	9.59946	9.21731	9.73946	-0.382153	0.139995	0.522148	0.0410247	0.420143	0.0178186	1.38695	0.376603	1.74913	5	5	5
Myo1c	Unconventional myosin-Ic	7.70875	7.95844	7.42808	7.15527	7.36465	7.4433	7.0696	6.86245	7.11047	7.08027	7.46427	7.49905	7.2983	7.33637	7.56476	7.52304	7.11322	7.43255	-0.409818	-0.090487	0.319331	0.0411211	0.560314	0.0167992	1.38594	0.251568	1.77471	5	5	5
Gprc5b	G-protein coupled receptor family C group 5 member B	5.22439		5.11233	5.5185		5.61943		5.88263	6.66	6.04235	5.811	5.88404	5.45819	6.04363	7.05119	5.28507	6.0511	6.04961	0.76603	0.764538	-0.00149223	0.0411507	0.0831579	0.996814	1.38562	1.0801	0.00138596	3	4	5
Stom	Stomatin	8.62722	8.98561	8.0457	7.89399	8.00093	8.24921	7.61535	7.56645	7.52175	7.51869	7.83605	7.84027	7.69705	7.74199	8.13559	8.31069	7.69429	7.85019	-0.616405	-0.460504	0.155901	0.0411852	0.0748844	0.356631	1.38526	1.12561	0.44778	5	5	5
Abi2	Abl interactor 2	8.95399	9.08398	9.29642	9.22281	9.14447	9.17551	9.27363	9.37343	9.36211	9.5384	9.22836	9.32549	9.03937	9.22819	9.22903	9.14033	9.34462	9.21009	0.20428	0.0697506	-0.13453	0.0412381	0.379705	0.115049	1.3847	0.420554	0.939115	5	5	5
Apod	Apolipoprotein D	8.72408	9.34388	8.08942	8.17878	8.11039	8.30974	7.69617	7.73546	7.8456	7.41199	8.0294	8.22561	8.2588	8.13368	8.38548	8.48931	7.79979	8.20659	-0.689516	-0.282715	0.406801	0.0413214	0.292152	0.032879	1.38382	0.534391	1.48308	5	5	5
Alg5	Dolichyl-phosphate beta-glucosyltransferase	8.45687		7.97594	7.78891	7.8384	8.42965	8.242	8.42396	8.38308	8.33691	7.80737	8.11005	8.17701	8.81758	9.23563	8.01503	8.36312	8.42953	0.348091	0.414499	0.0664078	0.0413391	0.241481	0.806597	1.38364	0.617117	0.0933435	4	5	5
Synj2bp	Synaptojanin-2-binding protein	6.81016		7.11613	6.39431	6.72284	6.60148	7.45489	8.04753	7.9125	8.28944	7.28842	7.80767	7.41999	7.74422	7.35056	6.76086	7.66117	7.52217	0.900312	0.761314	-0.138998	0.0417266	0.00360889	0.671744	1.37959	2.44263	0.172796	4	5	5
Dpp4	Dipeptidyl peptidase 4	9.44952	10.8023	9.3757	9.15367	9.22844	8.93244	9.11837	8.62428	8.61147	8.85988	9.20638	9.02141	8.86459	9.0665	9.37007	9.60192	8.82929	9.10579	-0.772632	-0.496131	0.276501	0.0419128	0.155531	0.0639825	1.37765	0.808183	1.19394	5	5	5
Ecpas	Proteasome adapter and scaffold protein ECM29	7.06079	7.69452	7.00586	6.80307	7.0909	6.92861	6.62621	6.66413	6.73915	6.78012	7.07849	7.33147	6.99186	6.70345	6.87842	7.13103	6.74764	6.99674	-0.383385	-0.134293	0.249091	0.0419967	0.482815	0.0661302	1.37679	0.316219	1.1796	5	5	5
Rapgef4	Rap guanine nucleotide exchange factor 4	8.16922	8.48989	7.72055	7.7039	8.2071	7.7965	7.92673	7.4728	7.35935	7.48652	7.48028	7.52965	7.35056	7.11823	7.14852	8.05813	7.60838	7.32545	-0.449751	-0.732683	-0.282932	0.0420325	0.00288871	0.0718828	1.37641	2.5393	1.14338	5	5	5
Immt	MICOS complex subunit Mic60	10.8291	11.743	10.537	10.3491	10.9133	11.0866	11.5495	12.1448	11.4545	11.7017	10.9407	11.1649	10.841	11.042	11.0191	10.8743	11.5874	11.0015	0.713095	0.127244	-0.585852	0.0420735	0.618348	0.0117835	1.37599	0.208767	1.92872	5	5	5
Cndp2	Cytosolic non-specific dipeptidase	7.42913		7.02815	7.23711	7.29518	7.49852	7.51747	7.45492	7.50689	7.31283	7.2398	7.04562	7.08322	7.24166	7.72911	7.24739	7.45812	7.26788	0.210735	0.0204915	-0.190243	0.042086	0.899536	0.17474	1.37586	0.0459815	0.757607	4	5	5
Ap3s2	AP-3 complex subunit sigma-2	8.00249		7.74833	7.41813	7.81151	7.63092	7.09842	7.33916	7.4782	7.3681	7.21477	8.0749	7.83489	7.8367	8.09	7.74512	7.38296	7.81025	-0.362157	0.0651363	0.427294	0.0420988	0.764762	0.0462471	1.37573	0.116474	1.33492	4	5	5
Sncb	Beta-synuclein	8.9907	8.67965	8.53411	9.86186	9.03628	9.95848	9.22299	10.0502	9.76697	9.45468	8.83113	8.44956	8.552	8.95743	9.59232	9.02052	9.69067	8.87649	0.670148	-0.144032	-0.81418	0.0423303	0.650224	0.012498	1.37335	0.186937	1.90316	5	5	5
Pgam5	Serine/threonine-protein phosphatase PGAM5, mitochondrial	7.22225		7.38949	6.87254	7.47026	7.27743	8.247	8.06885	7.72717	7.65017	8.29891	8.02537	7.98633	7.79809	7.80366	7.23864	7.79412	7.98247	0.555487	0.743835	0.188348	0.0425075	0.00204157	0.35639	1.37153	2.69004	0.448075	4	5	5
Slc30a3	Probable proton-coupled zinc antiporter SLC30A3	9.62054	11.0289	9.52822	9.37793	10.0179	9.06464	9.8001	8.86682	8.81377	8.77443	9.41264	9.59651	9.49933	9.40689	9.32751	9.9147	9.06395	9.44858	-0.850751	-0.466126	0.384625	0.0428616	0.160705	0.0855158	1.36793	0.79397	1.06795	5	5	5
Dctn4	Dynactin subunit 4	7.74687	8.06724	7.80519	8.05977	7.78188	8.41111	7.86467	8.08881	8.24083	8.24794	7.90227	8.2111	7.8601	8.025	8.02096	7.89219	8.17067	8.00389	0.278482	0.111698	-0.166784	0.0429786	0.265701	0.169262	1.36675	0.575607	0.77144	5	5	5
Vps26b	Vacuolar protein sorting-associated protein 26B	9.40216	10.1703	9.17437	9.10771	9.46306	9.27529	8.97964	8.85411	8.80215	8.93138	9.31055	9.23511	9.33595	8.55678	8.65158	9.46353	8.96852	9.01799	-0.495013	-0.445534	0.0494789	0.0430942	0.117997	0.80047	1.36558	0.92813	0.0966547	5	5	5
Gnai1	Guanine nucleotide-binding protein G(i) subunit alpha-1	12.5695	12.6362	12.8399	12.9863	12.9674	12.9701	13.4936	13.0726	13.0567	12.9632	12.8093	12.9009	12.7062	13.0033	12.9272	12.7998	13.1113	12.8694	0.311403	0.069532	-0.241871	0.0431762	0.50316	0.0603371	1.36476	0.298294	1.21942	5	5	5
Agap2	Arf-GAP with GTPase, ANK repeat and PH domain-containing protein 2	7.55643	8.63237	7.76681	7.78436	8.04301	7.59731	7.82365	7.37127	7.1152	6.99913	8.00176	7.68795	7.54572	6.71876	7.08516	7.9566	7.38131	7.40787	-0.575283	-0.548727	0.0265558	0.0431849	0.0981614	0.924848	1.36467	1.00806	0.0339296	5	5	5
Slc20a2	Sodium-dependent phosphate transporter 2	6.3021	5.49186	7.6852	5.7815	6.56946	7.27278	8.03464	7.70663	7.28138	6.76899	6.7037		6.03997	6.90032		6.36602	7.41288	6.548	1.04686	0.181971	-0.864888	0.0434036	0.748247	0.0456174	1.36247	0.125955	1.34087	5	5	3
Cdh18	Cadherin 18	6.48548		6.56065	6.55341		6.74755		7.05032		6.73189	6.97951	6.72547	6.9385	6.8789		6.53318	6.84325	6.88059	0.31007	0.347411	0.0373409	0.0434521	0.00394942	0.745617	1.36199	2.40347	0.127484	3	3	4
Tkt	Transketolase	8.3689	7.1771	8.83855	9.4186	8.65201	9.10583	9.49718	9.43616	9.52108	9.41878	8.97192	8.90504	8.66474	8.96148	9.70219	8.49103	9.39581	9.04108	0.904776	0.550044	-0.354731	0.0436941	0.216241	0.0985746	1.35958	0.665063	1.00623	5	5	5
Trappc13	Trafficking protein particle complex subunit 13	8.46072	10.0675	8.23372	7.72806	8.32732	7.88499	7.05929	7.42045	7.69595	7.71548	8.04445	8.67068	8.06954	8.1258	8.30216	8.56347	7.55523	8.24253	-1.00824	-0.320945	0.687297	0.0437234	0.45904	0.00599362	1.35929	0.33815	2.22231	5	5	5
Oplah	5-oxoprolinase	7.41159		7.72391	7.34993	7.95955	8.5845	8.84988	8.0952		7.77071	7.5274					7.61124	8.32507	7.5274	0.713827	-0.0838422	-0.797669	0.0438643	#DIV/0!	#DIV/0!	1.35789	#DIV/0!	#DIV/0!	4	4	1
Sass6	Spindle assembly abnormal protein 6 homolog	7.08817		7.49519	7.45153	7.21796	6.97141		6.62966	6.93211	7.19005	7.49579	8.41087	8.15041	7.85522	7.51591	7.31321	6.93081	7.88564	-0.382406	0.572426	0.954832	0.0439459	0.034851	0.00392049	1.35708	1.45778	2.40666	4	4	5
Wdr82	WD repeat-containing protein 82	4.48737		4.61823	4.79396	4.71375	4.95278				5.53103		5.21415	4.8409	5.45432	5.64346	4.65333	5.2419	5.28821	0.588574	0.63488	0.0463053	0.0440313	0.0140027	0.889969	1.35624	1.85379	0.0506249	4	2	4
Atg4c	Cysteine protease ATG4C	5.76854		6.02194	5.87244	5.85563	5.6078	5.08999	4.75115	5.62385	5.6935	5.43916	5.83695	5.2704	5.60043	5.41872	5.87964	5.35326	5.51313	-0.52638	-0.366507	0.159873	0.0441944	0.0175953	0.465722	1.35463	1.7546	0.331874	4	5	5
Cul2	Cullin-2	6.37945	7.53805	6.35748	6.46022	5.95394	6.02645	5.69701	5.34765	6.16665	5.86701	5.87236	6.84504	6.21912	6.29026	6.41601	6.53783	5.82095	6.32856	-0.716872	-0.209271	0.507601	0.0442597	0.516421	0.0435881	1.35399	0.286996	1.36063	5	5	5
Rph3a	Rabphilin-3A	7.15472	7.35657	7.51744	7.78861	7.38735	7.6812	7.66727	7.60553	8.40704	8.04567	7.70512	7.81505	7.83767	8.10437	8.28832	7.44094	7.88134	7.95011	0.440406	0.509167	0.0687611	0.0444408	0.00931855	0.721688	1.35222	2.03065	0.141651	5	5	5
Mtnd4	NADH-ubiquinone oxidoreductase chain 4	8.75497		8.16453	7.51018	8.18363	8.40999	9.47949	8.97478	8.76282	8.78886	8.71822	9.21549	8.93714	8.85918	8.75549	8.15333	8.88319	8.8971	0.729861	0.743777	0.0139157	0.0445342	0.0189325	0.945121	1.35131	1.72279	0.0245126	4	5	5
Cacnb1	Voltage-dependent L-type calcium channel subunit beta-1	9.82789	10.7335	9.62338	9.83685	9.85927	9.45128	9.6999	9.56018	9.47639	9.13906	9.53946	9.2885	9.66658	9.50036	9.35114	9.97618	9.46536	9.46921	-0.510815	-0.506968	0.00384674	0.0447746	0.0388844	0.974025	1.34897	1.41022	0.01143	5	5	5
Hnrnpll	Heterogeneous nuclear ribonucleoprotein L-like	7.61252	8.63773	7.4502	7.24645	7.44213	7.27778	7.11364	7.05785	6.85733	7.04189	7.05331	7.37213	7.20748	6.7084	6.59536	7.67781	7.0697	6.98734	-0.608108	-0.690471	-0.0823637	0.0448436	0.0429861	0.624459	1.3483	1.36667	0.204496	5	5	5
Mt1	Metallothionein-1	6.99082	6.88126	6.52102	6.61158	6.23025	6.06531	5.79997	6.21641	6.45499	6.49028	5.73304	6.24539	5.77075	6.25305	6.45112	6.64699	6.20539	6.09067	-0.441595	-0.556316	-0.114721	0.0448988	0.0222448	0.566892	1.34777	1.65277	0.2465	5	5	5
Hagh	Hydroxyacylglutathione hydrolase, mitochondrial	5.27354		6.55726	6.82528	6.25688	7.01136	6.5243	7.12583	7.28027	7.33488	6.86603	6.93157	6.79309	6.7877	7.15772	6.22824	7.05533	6.90722	0.827088	0.678981	-0.148107	0.0450854	0.0628691	0.380806	1.34596	1.20156	0.419296	4	5	5
Coro2b	Coronin-2B	9.70794	9.69679	9.55538	9.3708	9.78468	9.3397	9.47596	9.3462	9.57404	9.3517	9.47959	9.74573	9.47713	9.18109	9.42084	9.62312	9.41752	9.46088	-0.205599	-0.162241	0.0433575	0.0451664	0.1991	0.679782	1.34518	0.70093	0.16763	5	5	5
Rims1	Regulating synaptic membrane exocytosis protein 1	7.10776	7.59193	7.27065	7.20121	7.597	7.09727	6.98114	7.26281	7.09314	6.9848	7.3575	6.93256	7.03687	7.37997	7.28341	7.35371	7.08383	7.19806	-0.269878	-0.155649	0.114229	0.0452151	0.284869	0.302543	1.34472	0.545354	0.519213	5	5	5
Wipi2	WD repeat domain phosphoinositide-interacting protein 2	8.88115	9.30111	8.4663	7.78083	8.84916	8.1242	8.68328	7.49277	7.20893	6.88949	7.52677	8.29438	6.74283	8.14464	8.78278	8.65571	7.67973	7.89828	-0.975979	-0.757432	0.218547	0.0452502	0.119595	0.659302	1.34438	0.922285	0.180916	5	5	5
Adpgk	ADP-dependent glucokinase			5.99925	5.85865			6.60865	6.41776	7.23771	6.5916		6.23388	6.55824	6.60461	6.65444	5.92895	6.71393	6.51279	0.784979	0.583843	-0.201136	0.0453073	0.0172295	0.360917	1.34383	1.76373	0.442592	2	4	4
Flnb	Filamin-B	5.10247		4.3299	4.37618	4.57655	5.78312	5.74829	5.67182	7.88814	4.95417	5.09363	5.03542	5.0446	4.03524	3.70204	4.59627	6.00911	4.58219	1.41283	-0.0140874	-1.42692	0.0453299	0.970699	0.0382239	1.34361	0.0129154	1.41767	4	5	5
Cmtr1	Cap-specific mRNA (nucleoside-2'-O-)-methyltransferase 1	7.70498	10.4355	7.61205	7.44688	7.54415	7.21463	6.56063	6.54016	6.56378	6.91468	6.94505	6.50781	6.21187	6.25541	6.52524	8.1487	6.75878	6.48908	-1.38993	-1.65963	-0.2697	0.0458616	0.0223958	0.186882	1.33855	1.64983	0.728433	5	5	5
Usp9y	ubiquitinyl hydrolase 1	9.06252	10.1842	8.76427	8.75499	8.65887	8.91515	8.09372	7.29401	7.96468	8.51592	8.76418	9.33335	8.78774	8.94948	9.25077	9.08497	8.1567	9.0171	-0.928271	-0.0678629	0.860409	0.045882	0.830275	0.0200075	1.33836	0.0807781	1.69881	5	5	5
Dagla	Diacylglycerol lipase-alpha	9.14962	9.72712	9.18064	9.38706	9.30193	8.79817	9.04911	9.08038	9.29409	8.97998	8.98458	9.2235	9.37224	9.62199	9.63485	9.34928	9.04035	9.36743	-0.308928	0.0181557	0.327084	0.0460543	0.912988	0.0566879	1.33673	0.0395351	1.24651	5	5	5
Slc25a4	ADP/ATP translocase 1	12.4396	12.5117	11.8973	11.424	12.3812	12.5099	13.6066	13.3609	12.3366	12.6576	11.7821	12.2769	11.659	12.0246	12.1043	12.1308	12.8943	11.9694	0.763546	-0.16139	-0.924937	0.0461073	0.511635	0.00947294	1.33623	0.29104	2.02352	5	5	5
Tmem151b	Transmembrane protein 151B	8.20034		8.0277	7.94825	8.01527	8.24252	8.03727	8.42763	8.24717	8.35637	8.51647	8.14816	8.81174	8.37407	8.0758	8.04789	8.26219	8.38525	0.214304	0.33736	0.123056	0.0461565	0.0694257	0.430121	1.33577	1.15848	0.36641	4	5	5
Cpt1a	Carnitine O-palmitoyltransferase 1, liver isoform	9.3751	9.13614	9.11163	8.90237	9.21741	9.33544	9.3966	9.69491	9.57207	9.16234	8.86133	9.5195	9.24574	9.64646	10.0069	9.14853	9.43227	9.45598	0.283741	0.30745	0.0237097	0.0462876	0.176412	0.914405	1.33453	0.753473	0.0388614	5	5	5
Adap1	ArfGAP with dual PH domains 1	7.47675		7.34132	6.92273	6.89409	7.83532	7.23948	7.41114	7.94948	7.78468	7.51009	8.13301	7.67116	7.35057	7.52018	7.15872	7.64402	7.637	0.485301	0.47828	-0.00702093	0.0463814	0.0476585	0.971518	1.33366	1.32186	0.012549	4	5	5
Igsf8	Immunoglobulin superfamily member 8	11.4829	11.4958	11.6375	11.8588	11.775	11.6364	11.9964	12.0309	11.8876	11.8938	11.733	11.6543	11.6989	12.0331	11.8841	11.65	11.889	11.8007	0.239028	0.150676	-0.0883519	0.0465556	0.178178	0.394526	1.33203	0.749145	0.403924	5	5	5
Eif3c	Eukaryotic translation initiation factor 3 subunit C	10.1249	10.2759	9.91338	9.5703	9.91492	9.85556	9.48862	9.48379	9.64869	9.70378	9.53255	9.86114	9.45406	8.99035	9.16209	9.95988	9.63609	9.40004	-0.323791	-0.559843	-0.236052	0.0469555	0.0196102	0.194369	1.32831	1.70752	0.711373	5	5	5
Atp6v1b2	V-type proton ATPase subunit B, brain isoform	13.5657	13.6759	14.0219	13.6566	13.5204	13.224	13.5178	13.3181	13.5099	13.5729	13.892	13.7792	13.818	14.1513	14.1809	13.6881	13.4285	13.9643	-0.259553	0.276198	0.53575	0.0470945	0.0536333	0.00109077	1.32703	1.27057	2.96227	5	5	5
Cdc27	Cell division cycle protein 27 homolog	5.84919		5.11875	5.82792	6.0602	6.1386		6.35134	6.22986	6.22657	6.33633	6.50161	6.16379	5.80333	6.21864	5.71402	6.23659	6.20474	0.522577	0.490725	-0.0318522	0.0471312	0.0637204	0.822626	1.32669	1.19572	0.0847977	4	4	5
Fkrp	Ribitol 5-phosphate transferase FKRP	8.69822	9.54656	7.96717	7.56057	8.29169	7.77659	7.54689	7.33185	7.73569	7.59083	7.69889	7.53228	7.80565	7.13553	7.07094	8.41284	7.59637	7.44866	-0.816472	-0.964188	-0.147715	0.0472681	0.0314719	0.403953	1.32543	1.50208	0.393669	5	5	5
Cox6a1	Cytochrome c oxidase subunit 6A1, mitochondrial			8.31629	9.05638	8.59591	9.67387	10.9422	9.44905	11.7073	9.41761	8.50995	9.51193	8.79375	9.26137	11.7552	8.6562	10.238	9.56643	1.58181	0.910237	-0.671569	0.0472965	0.2886	0.388911	1.32517	0.539704	0.41015	3	5	5
Romo1	Reactive oxygen species modulator 1	6.00808		5.98698	5.44573	5.65759	5.97075	5.90958	6.7382	6.31804	6.62272	4.82159	5.7234	5.12421	5.90035	5.37618	5.7746	6.31186	5.38914	0.537261	-0.385451	-0.922713	0.0473107	0.169815	0.00709756	1.32504	0.770024	2.14889	4	5	5
Cav1	Caveolin-1	9.64339	8.66097	9.61474	9.27623	8.90228	9.00528	8.40912	8.46777	8.63787	8.91996	9.45427	9.37355	9.37464	8.41773	8.9292	9.21952	8.688	9.10988	-0.531522	-0.109646	0.421876	0.0476724	0.701386	0.103296	1.32173	0.154043	0.985916	5	5	5
Ndufa1	NADH dehydrogenase [ubiquinone] 1 alpha subcomplex subunit 1	9.14599	8.36615	9.1914	8.68212	9.38838	9.04731	9.87533	10.116	9.25771	9.63991	8.78761	9.27584	8.77986	8.88592	8.88205	8.95481	9.58724	8.92226	0.632436	-0.0325517	-0.664988	0.0477648	0.879688	0.0150978	1.32089	0.0556714	1.82109	5	5	5
Eif3h	Eukaryotic translation initiation factor 3 subunit H	8.38782	8.50252	8.1361	7.77475	8.32282	8.01405	7.99703	7.65496	7.88702	7.90801	7.67712	8.20866	7.66413	7.19979	7.36089	8.2248	7.89221	7.62212	-0.332587	-0.602682	-0.270095	0.0478653	0.0227969	0.180516	1.31998	1.64212	0.743485	5	5	5
Copa	Coatomer subunit alpha	10.2112	10.8524	10.09	10.0559	10.1767	9.80837	10.195	9.82464	9.87498	9.73508	10.2173	10.3193	10.2601	10.0963	10.5007	10.2773	9.88762	10.2788	-0.389641	0.00149981	0.391141	0.0478753	0.99279	0.00554922	1.31989	0.00314262	2.25577	5	5	5
Rab3gap1	Rab3 GTPase-activating protein catalytic subunit	8.1218	8.89943	7.98607	7.85183	8.17707	7.99393	7.68676	7.72175	7.67059	7.72956	7.93771	7.99676	7.74056	7.51832	7.66581	8.20724	7.76052	7.77183	-0.446721	-0.435408	0.0113138	0.0479079	0.0633744	0.917691	1.31959	1.19809	0.0373036	5	5	5
Naxe	NAD(P)H-hydrate epimerase				6.44117	5.17487		6.87527	6.83808	7.67327	7.49188	7.43351	6.82228	7.03146	7.25594	7.95513	5.80802	7.21962	7.29966	1.41161	1.49164	0.0800392	0.0483137	0.0239679	0.789355	1.31593	1.62037	0.102727	2	4	5
Gpr107	Protein GPR107	7.34798	8.08012	7.04451	7.03312	6.87492	6.95954	6.88322	6.41861	6.82312	6.48906	7.02225	7.27719	7.23721	6.96981	7.55039	7.27613	6.71471	7.21137	-0.561418	-0.0647585	0.496659	0.0483697	0.793008	0.0108423	1.31543	0.100722	1.96488	5	5	5
Osbp2	Oxysterol-binding protein 2	7.63049	8.21798	7.42195	7.1672	7.42566	7.14484	6.45681	6.80771	7.46356	7.12595	7.48716	7.97997	7.70801	7.68282	8.05458	7.57266	6.99977	7.78251	-0.572882	0.209853	0.782734	0.0483936	0.336952	0.00445026	1.31521	0.472432	2.35161	5	5	5
Eif4h	Eukaryotic translation initiation factor 4H	6.52394		7.20664	7.67238	7.10541	7.85619	7.6769	7.8851	9.52164	7.91855	8.09068	7.26537	7.75773	7.24711	7.87537	7.12709	8.17168	7.64725	1.04459	0.520161	-0.524425	0.0484354	0.107357	0.20432	1.31484	0.96917	0.689688	4	5	5
Dnajb1	DnaJ homolog subfamily B member 1	7.74348	10.1965	7.69707	7.45489	7.98535	7.33845	6.69856	7.07808	7.02882	6.97047	7.24056	7.19091	7.07989	6.90018	6.35586	8.21546	7.02288	6.95348	-1.19258	-1.26198	-0.0693984	0.0484706	0.0436503	0.724996	1.31452	1.36001	0.139664	5	5	5
Fyn	Tyrosine-protein kinase Fyn			5.51355	5.19	4.64623		5.77837	5.62563	6.94648	6.58309	6.30227	7.25602	6.41851	6.31464	7.01101	5.11659	6.23339	6.66049	1.1168	1.5439	0.427098	0.048728	0.00302832	0.271461	1.31222	2.5188	0.566292	3	4	5
Farsb	Phenylalanine--tRNA ligase beta subunit	8.00444	9.18343	7.67168	7.21158	7.76638	7.28237	7.27825	7.15949	7.22312	7.02873	7.1065	7.85316	7.17618	7.29347	7.93657	7.9675	7.19439	7.47318	-0.773111	-0.494328	0.278783	0.0490201	0.222483	0.162948	1.30963	0.652704	0.787952	5	5	5
Prpf8	Pre-mRNA-processing-splicing factor 8	6.94038	7.47752	6.57121	6.36778	6.82723	6.2241	6.43792	6.20616	6.62666	6.32632	6.66866	7.0285	6.9128	6.75652	7.40644	6.83682	6.36423	6.95458	-0.472591	0.11776	0.590351	0.0491672	0.620232	0.00439468	1.30832	0.207446	2.35707	5	5	5
Rpl23	Large ribosomal subunit protein uL14	10.2374	10.688	10.3945	10.4564	10.1967	10.0637	9.72486	10.1462	10.2892	10.2225	10.5085	11.1919	10.6873	10.8577	11.4422	10.3946	10.0893	10.9375	-0.305328	0.542923	0.848251	0.0493705	0.0215088	0.00250585	1.30653	1.66738	2.60104	5	5	5
Rab39b	Ras-related protein Rab-39B	8.6417	8.99575	8.28465	8.34829	8.69045	8.54179	8.15697	8.25445	8.19547	8.04252	8.13624	8.25665	8.17916	7.93496	8.39101	8.59217	8.23824	8.1796	-0.353929	-0.412565	-0.0586363	0.0494366	0.0240309	0.615219	1.30595	1.61923	0.21097	5	5	5
Rasgef1a	RasGEF domain family, member 1A	6.98082	8.47218	7.09426	7.39211	7.18056	6.83817	6.39102	6.73565	6.9386	6.88984	7.56489	7.49201	7.67578	7.50411	7.87773	7.42398	6.75866	7.62291	-0.665328	0.198921	0.864249	0.0495041	0.497414	9.91228e-05	1.30536	0.303282	4.00383	5	5	5
Ndufa10	NADH dehydrogenase [ubiquinone] 1 alpha subcomplex subunit 10, mitochondrial	9.7905	10.6365	9.76204	9.22018	9.94524	9.832	10.9957	11.0031	10.4922	10.6445	9.79434	10.5036	10.1909	10.141	10.3575	9.87089	10.5935	10.1975	0.722613	0.326578	-0.396036	0.0496246	0.239127	0.145657	1.3043	0.621372	0.836667	5	5	5
Wdr6	WD repeat-containing protein 6	8.12676		8.22996	7.97814	8.21718	8.85914	8.17377	8.24684	8.57814	8.77809	8.5625	8.65233	8.47348	8.28401	8.50706	8.13801	8.5272	8.49588	0.389187	0.357867	-0.03132	0.0496416	0.00421507	0.840461	1.30415	2.37519	0.0754824	4	5	5
Lyn	Tyrosine-protein kinase Lyn	8.43292	9.47588	8.68773	8.42453	8.52526	8.76961	8.14816	7.81809	7.83498	7.89564	7.75484	7.84018	7.94389	7.54471	7.76057	8.70926	8.0933	7.76884	-0.615967	-0.940428	-0.324461	0.0496474	0.00194938	0.127471	1.3041	2.7101	0.894589	5	5	5
Kiaa2013	Uncharacterized protein KIAA2013	9.38077	10.6637	9.04545	8.76388	9.08704	8.591	8.25365	8.35004	8.88967	8.76746	8.85651	8.89259	8.94966	9.30726	10.0291	9.38817	8.57036	9.20704	-0.81781	-0.181138	0.636672	0.0499866	0.662635	0.0351149	1.30115	0.178726	1.45451	5	5	5
Ndst1	Bifunctional heparan sulfate N-deacetylase/N-sulfotransferase 1	7.86929	8.79105	7.43306	7.3497	7.68745	7.16825	7.33963	6.92499	7.4906	6.99167	6.92907	7.22544	7.23042	7.76884	8.09257	7.82611	7.18303	7.44927	-0.643083	-0.376842	0.266241	0.0500454	0.290602	0.290581	1.30064	0.536702	0.536733	5	5	5
B3galnt1	UDP-GalNAc:beta-1,3-N-acetylgalactosaminyltransferase 1	8.70496	8.46379	8.01176	8.01687	8.42453	8.21859	8.11697	7.86985	7.76797	7.73583	7.94739	7.90639	8.02664	8.01883	8.47808	8.32438	7.94184	8.07547	-0.382539	-0.248912	0.133627	0.0502187	0.18173	0.371124	1.29913	0.740574	0.430481	5	5	5
Fxyd1	Phospholemman	14.1381	15.5793	13.678	13.8226	13.6971	13.9664	12.868	12.6439	13.2602	13.3023	12.8701	13.2293	12.8898	13.5465	13.0456	14.183	13.2082	13.1163	-0.974875	-1.06677	-0.0918915	0.0504726	0.0229288	0.731312	1.29694	1.63962	0.135898	5	5	5
Myod1	Myoblast determination protein 1	5.41719	8.24684	7.47188	7.30374	5.5404	5.24135	3.04564	3.89886	6.46984	5.7118	5.3743	4.04536	5.7543	5.7994	5.28491	6.79601	4.8735	5.25165	-1.92251	-1.54436	0.378153	0.0504765	0.0435658	0.601953	1.29691	1.36085	0.220437	5	5	5
Rasgrp2	RAS guanyl-releasing protein 2	7.27511		6.94779	7.10988	7.40227	7.40255	7.54254	7.30778	7.85429	7.43411	7.76276	7.92891	7.82698	7.57492	8.21327	7.18376	7.50825	7.86137	0.324494	0.67761	0.353116	0.0506146	0.00250522	0.036964	1.29572	2.60115	1.43222	4	5	5
Aldh5a1	Succinate-semialdehyde dehydrogenase, mitochondrial	8.55645	9.54901	8.23934	8.22755	8.55858	9.20687	9.31205	9.66181	8.93046	9.12341	8.34778	8.66585	8.27116	8.35833	8.44028	8.62618	9.24692	8.41668	0.620737	-0.209505	-0.830241	0.0508576	0.428388	0.000330237	1.29364	0.368162	3.48117	5	5	5
Camk1	Calcium/calmodulin-dependent protein kinase type 1	9.15258	9.43895	8.9174	8.69947	8.76198	8.9217	8.5666	8.31772	8.62004	8.63442	8.80669	9.08845	8.72252	8.27343	8.57926	8.99408	8.6121	8.69407	-0.381984	-0.30001	0.0819736	0.0509752	0.154662	0.63262	1.29264	0.810616	0.198857	5	5	5
Cdk18	Cyclin-dependent kinase 18	6.05543		6.29155	6.10651	6.30694	6.56259	6.97134	6.05289	6.86845	6.75398	7.27434	7.75231	7.13586	7.0401	7.31548	6.1901	6.64185	7.30362	0.451745	1.11351	0.661768	0.0510699	0.000145135	0.0115752	1.29183	3.83823	1.93647	4	5	5
Por	NADPH--cytochrome P450 reductase	10.9289	11.0572	10.8147	10.438	10.663	10.9004	11.115	11.1078	11.1264	10.985	10.6612	10.6864	10.9075	11.3876	11.6895	10.7804	11.0469	11.0664	0.26654	0.286049	0.0195085	0.0512204	0.248427	0.927578	1.29056	0.604801	0.0326497	5	5	5
Map2k7	Dual specificity mitogen-activated protein kinase kinase 7	9.10266	10.7598	8.64467	8.50675	8.93811	8.48412	8.36402	8.12097	8.09775	8.15286	8.68069	8.67363	8.6594	8.55314	8.95347	9.1904	8.24394	8.70407	-0.946461	-0.486338	0.460123	0.0512693	0.27129	0.00189689	1.29014	0.566567	2.72196	5	5	5
Unc93b1	Protein unc-93 homolog B1	5.70887	6.42774	5.93749	6.08645		6.42008	7.1068	6.44478	6.4423	6.27313	6.5522	6.57854	6.82188	6.9604	7.20985	6.04014	6.53742	6.82457	0.497283	0.784437	0.287154	0.0512829	0.00467401	0.170472	1.29003	2.33031	0.768348	4	5	5
Fam20b	Glycosaminoglycan xylosylkinase	9.59065	9.9489	9.2526	9.11594	9.64493	9.14481	9.1932	9.09084	9.33188	8.95747	9.07159	9.02019	9.17238	9.46457	10.0274	9.5106	9.14364	9.35124	-0.366965	-0.159369	0.207596	0.0513782	0.521214	0.319534	1.28922	0.282984	0.495482	5	5	5
Alb	Albumin	7.69763	7.94699	7.96126	7.9023	8.49342	8.36744	8.47228	8.7693	7.93774	8.78886	7.75505	7.75213	7.08529	8.6329	8.43078	8.00032	8.46712	7.93123	0.466802	-0.0690877	-0.535889	0.051566	0.826884	0.129059	1.28764	0.0825554	0.889212	5	5	5
Lin7b	Protein lin-7 homolog B	7.66914		7.70249	8.16662	8.3017	8.19853	8.89763	8.29417	8.48472	8.27582	8.10551	8.02093	8.30995	8.21683	8.35965	7.95999	8.43017	8.20257	0.470185	0.242587	-0.227597	0.051815	0.168978	0.14457	1.28554	0.772171	0.839922	4	5	5
Ncs1	Neuronal calcium sensor 1	9.61415	10.2756	9.64774	9.69525	9.81166	9.62214	9.43183	9.55716	9.51354	9.48675	9.76764	9.83055	9.73483	9.74716	9.7352	9.80888	9.52228	9.76307	-0.286601	-0.0458093	0.240791	0.0518788	0.718569	0.00018033	1.28501	0.143531	3.74393	5	5	5
Tm9sf3	Transmembrane 9 superfamily member 3	10.3026	10.1944	9.89472	9.72931	10.078	9.69711	9.94042	9.67626	9.89648	9.48915	9.79181	9.87922	10.1151	10.2738	10.8322	10.0398	9.73989	10.1784	-0.299909	0.138641	0.438549	0.0518822	0.529814	0.0613329	1.28498	0.275877	1.21231	5	5	5
Hectd3	E3 ubiquitin-protein ligase HECTD3	6.53641		6.22488	5.92296	6.4985	6.44203	6.87457	6.45038	6.9613	6.8101	6.55487	7.16111	6.89301	6.4083	6.7714	6.29569	6.70768	6.75774	0.411988	0.462048	0.0500599	0.0518939	0.0490572	0.776994	1.28488	1.3093	0.109583	4	5	5
Erp29	Endoplasmic reticulum resident protein 29	7.24142		6.81194	6.68377	7.43574	8.22289	8.08672	7.2805								7.04322	7.86337	#DIV/0!	0.82015	#DIV/0!	#DIV/0!	0.0520081	#DIV/0!	#DIV/0!	1.28393	#DIV/0!	#DIV/0!	4	3	0
Hnrnpr	Heterogeneous nuclear ribonucleoprotein R	9.66722	10.9661	9.626	9.1765	9.73765	9.18698	9.25857	8.73436	9.40406	8.90365	9.30172	9.98506	9.42902	8.95423	9.42333	9.83469	9.09752	9.41867	-0.737168	-0.41602	0.321148	0.0521145	0.258989	0.157398	1.28304	0.586719	0.803	5	5	5
Ptk2b	Protein-tyrosine kinase 2-beta	8.62888	9.0371	8.39488	8.09863	8.7925	8.38459	8.32628	8.02921	8.02661	8.16108	8.14283	8.38531	8.2384	7.547	7.87163	8.5904	8.18555	8.03703	-0.404847	-0.553365	-0.148519	0.0522292	0.035668	0.396715	1.28209	1.44772	0.401521	5	5	5
Prkca	Protein kinase C alpha type	10.8742	11.3757	10.7193	10.5178	10.7252	10.5632	10.5601	10.463	10.5098	10.4433	10.6373	10.815	10.5025	10.5776	10.8072	10.8424	10.5079	10.6679	-0.334569	-0.174536	0.160033	0.0522966	0.300485	0.0436676	1.28153	0.522177	1.35984	5	5	5
Add1	Alpha-adducin	8.42988	9.5546	8.43385	8.15725	8.36212	7.94028	7.79567	8.03911	8.0309	8.21423	7.94385	9.22333	8.10902	8.03365	8.40459	8.58754	8.00404	8.34289	-0.583502	-0.244652	0.33885	0.0523072	0.491928	0.200888	1.28144	0.308099	0.697046	5	5	5
Rab5a	Ras-related protein Rab-5A	10.0317	10.8281	10.0599	9.90337	10.0482	9.85703	9.85122	9.81265	9.76219	9.65305	10.0338	9.99401	9.75601	9.72832	9.9441	10.1743	9.78723	9.89126	-0.387029	-0.282999	0.104029	0.0524082	0.14911	0.192314	1.2806	0.826494	0.71599	5	5	5
Prkar1b	cAMP-dependent protein kinase type I-beta regulatory subunit	8.08256	9.38033	7.52463	7.3792	7.86388	7.61358	7.04863	6.78154	7.46422	6.86547	7.20898	7.50207	6.69769	6.82025	7.76347	8.04612	7.15469	7.19849	-0.891433	-0.84763	0.0438034	0.0525148	0.0716472	0.870099	1.27972	1.1448	0.0604311	5	5	5
Lamtor1	Ragulator complex protein LAMTOR1	5.42015		6.19168	6.63078	5.79138	6.52843	6.23781	6.66909	7.65066	7.31717	5.84032	7.01971	6.50665	7.23183	8.59963	6.0085	6.88063	7.03963	0.872134	1.03113	0.158996	0.052622	0.111996	0.77066	1.27883	0.950798	0.113137	4	5	5
Rpl9-ps6;Rpl9	60S ribosomal protein L9;Large ribosomal subunit protein uL6	8.47611	9.50853	8.40065	8.28923	8.29822	7.9267	7.70157	7.99369	8.3003	8.1755	8.72045	8.89632	8.72016	8.99396	9.28749	8.59455	8.01955	8.92368	-0.575	0.329127	0.904127	0.0527668	0.230933	0.000278407	1.27764	0.636514	3.55532	5	5	5
Ddx3x	ATP-dependent RNA helicase DDX3X	9.98979	10.6448	9.86028	9.63083	10.0297	9.76222	9.63809	9.26264	9.69437	9.64429	9.54634	9.97331	9.54469	9.33916	9.65808	10.0311	9.60032	9.61232	-0.430768	-0.418773	0.0119956	0.0528843	0.06729	0.931743	1.27667	1.17205	0.0307038	5	5	5
Kdm4b	Lysine-specific demethylase 4B	9.28143		9.51018	8.96016	8.28281	9.20306	9.72771	9.48953	10.1362	10.3071	9.83654	8.52598	9.48651	9.25079	7.64006	9.00864	9.77272	8.94797	0.764076	-0.0606699	-0.824746	0.0529786	0.907142	0.0981915	1.2759	0.0423245	1.00793	4	5	5
Glra2;Glra3	Glycine receptor subunit alpha-2;Glycine receptor subunit alpha-3	6.78271	7.39763	6.45486	6.72346	6.32969	6.93771	7.33533	7.09766	7.30852	7.27333	7.44235	7.13976	7.48688	7.79058	8.14227	6.73767	7.19051	7.60037	0.452841	0.862696	0.409856	0.0531933	0.00893438	0.0589933	1.27414	2.04894	1.2292	5	5	5
Ndufa11	NADH dehydrogenase [ubiquinone] 1 alpha subcomplex subunit 11	8.49887	8.97787	8.02221	7.5027	7.84354	8.22757	8.84782	9.16312	8.97195	9.1403	8.13591	8.9431	8.57729	8.72708	8.79278	8.16904	8.87015	8.63523	0.701115	0.466193	-0.234922	0.0533426	0.15007	0.315659	1.27293	0.823707	0.500782	5	5	5
Ajm1	Apical junction component 1 homolog	7.00521		6.0499	6.11582	6.34701	5.63195		5.57685	6.16663	5.68119	6.13436	7.16379	7.15916	7.48646	8.45862	6.37948	5.76415	7.28048	-0.61533	0.900992	1.51632	0.0536653	0.0930524	0.0105993	1.27031	1.03127	1.97472	4	4	5
Gramd1b	Protein Aster-B	7.56785	7.63988	7.3851	7.3502	7.11853	7.20117	7.20081	6.95691	7.35619	7.05727	7.37325	7.76641	7.72516	7.89197	8.42283	7.41231	7.15447	7.83592	-0.257841	0.423612	0.681453	0.0537424	0.0595582	0.00589755	1.26968	1.22506	2.22933	5	5	5
Nwd2	NACHT and WD repeat domain-containing protein 2	8.98375	9.94358	8.41191	8.5295	8.79105	8.36498	8.61651	8.10217	8.14923	8.17525	8.7427	8.80497	9.10364	8.90278	8.58108	8.93196	8.28163	8.82703	-0.650329	-0.104924	0.545405	0.0538608	0.722649	0.00282643	1.26873	0.141073	2.54876	5	5	5
Rps3	Small ribosomal subunit protein uS3	11.736	12.1277	12.3489	12.3329	11.9473	11.6903	11.9728	11.7049	11.7515	11.9072	12.3079	12.4217	12.3419	12.085	12.1533	12.0986	11.8054	12.262	-0.293216	0.163389	0.456604	0.0539212	0.251751	0.0006286	1.26824	0.599028	3.20163	5	5	5
Mpzl1	Myelin protein zero-like protein 1	6.23229			5.77133		6.71336		7.02723		6.55646	6.09389	6.54266	6.14438	6.57305		6.00181	6.76568	6.33849	0.763872	0.336684	-0.427189	0.0540557	0.229033	0.0743288	1.26716	0.640102	1.12884	2	3	4
Timm13	Mitochondrial import inner membrane translocase subunit Tim13	7.6093	7.68558	7.51022	7.15649	7.75469	7.87771	7.78807	8.21075	7.88231	7.59196	7.45279	7.87823	7.3413	7.24753	7.53858	7.54325	7.87016	7.49169	0.326905	-0.0515697	-0.378474	0.0541488	0.741329	0.0334251	1.26641	0.129989	1.47593	5	5	5
Npc1	NPC intracellular cholesterol transporter 1	8.88666	9.10621	8.27244	8.62768	8.6156	8.52613	8.45356	8.41256	8.14672	8.15583	8.4549	8.55511	8.35847	8.87639	9.16208	8.70172	8.33896	8.68139	-0.36276	-0.0203271	0.342433	0.0544182	0.92323	0.075919	1.26426	0.0346899	1.11965	5	5	5
Bltp3a	UHRF1 (ICBP90) binding protein 1	8.25849	9.53143	8.1809	7.84708	8.11094	7.84703	7.43949	7.48247	7.90354	7.77306	8.19352	8.07481	8.2727	8.06058	7.99604	8.38577	7.68912	8.11953	-0.696651	-0.266235	0.430416	0.0546709	0.398983	0.00400072	1.26224	0.399046	2.39786	5	5	5
Arf2	ADP-ribosylation factor 2	10.698	9.32567	10.4752	10.0036	10.6257	9.64588	9.4416	9.98764	9.46529	9.49852	9.53995	10.0795	9.59331	8.88524	8.50959	10.2256	9.60779	9.32153	-0.617835	-0.904096	-0.286261	0.0547095	0.0435259	0.361691	1.26194	1.36125	0.441663	5	5	5
Plxna1	Plexin-A1	8.9734	9.39986	8.98775	8.97056	9.25433	9.31447	9.53617	9.37505	9.33102	9.19971	8.98847	8.94072	8.96347	9.14333	8.9353	9.11718	9.35128	8.99426	0.234104	-0.122921	-0.357025	0.0548406	0.239581	0.000685074	1.2609	0.620548	3.16426	5	5	5
Pllp	Plasmolipin	9.65271	10.3142	10.3604	10.2897	9.94584	9.28559	10.2051	9.16429	9.78088	9.54112	7.59866	10.6852	6.59432	10.7864	10.5579	10.1126	9.59539	9.24449	-0.517162	-0.868064	-0.350903	0.0551992	0.364195	0.710163	1.25807	0.438666	0.148642	5	5	5
Eftud2	116 kDa U5 small nuclear ribonucleoprotein component	8.02433	8.88921	7.807	7.66042	7.96208	7.21254	7.58771	7.55491	7.77175	7.60132	7.79874	8.34063	8.19969	7.74311	8.05918	8.06861	7.54565	8.02827	-0.522962	-0.0403373	0.482625	0.0553075	0.872421	0.0109322	1.25722	0.0592739	1.96129	5	5	5
Ctbp2	C-terminal-binding protein 2	9.95795	11.1788	9.95229	9.17094	9.96326	9.25135	9.23908	9.15498	9.5831	9.29596	9.36551	9.66993	8.72566	9.10816	8.92218	10.0446	9.30489	9.15829	-0.739751	-0.886356	-0.146606	0.0553437	0.0400746	0.442073	1.25693	1.39713	0.354506	5	5	5
Anapc7	Anaphase-promoting complex subunit 7	6.65758	7.08708	6.63142	6.39671	6.61056	6.35545	5.63375	6.00317	6.50282	6.56509	6.49582	6.9498	6.58228	6.65348	6.88846	6.67667	6.21205	6.71397	-0.464613	0.0373021	0.501916	0.0555346	0.80062	0.033096	1.25544	0.0965736	1.48022	5	5	5
Skt	Sickle tail protein	7.55914		7.43925	7.71824	8.0002	7.83251		8.27304	8.08725	7.97304	8.6138	8.17658	8.49462	8.44503	7.84313	7.67921	8.04146	8.31463	0.362253	0.635424	0.27317	0.0556096	0.0121091	0.165522	1.25485	1.91689	0.781143	4	4	5
Add2	Beta-adducin	8.44346	9.37982	8.1945	7.96451	8.50308	8.11994	8.13838	7.96669	7.62886	7.69474	7.98504	8.02944	7.83947	7.68047	7.66587	8.49707	7.90972	7.84006	-0.58735	-0.657016	-0.0696662	0.0559242	0.0312632	0.606353	1.2524	1.50497	0.217275	5	5	5
Rab3d	Ras-related protein Rab-3D	11.1404	12.3974	10.5533	10.525	10.9433	10.5146	10.5689	10.3191	10.1602	9.99139	10.4209	10.3457	9.85204	10.1852	11.5341	11.1119	10.3108	10.4676	-0.801054	-0.644306	0.156748	0.0559338	0.185223	0.619848	1.25233	0.732305	0.207715	5	5	5
Carhsp1	Calcium-regulated heat stable protein 1	6.38799		6.20778	6.48067	6.22916	6.28604	6.56404	6.85803	7.14008	6.75052	6.99747	6.90195	7.18094	7.01771	7.57121	6.3264	6.71974	7.13385	0.393341	0.807455	0.414114	0.0560709	0.000869302	0.0561218	1.25126	3.06083	1.25087	4	5	5
Rab3b	Ras-related protein Rab-3B	8.66746	10.6992	8.78491	8.57803	8.76364	8.47327	8.02872	8.23547	8.11452	8.06931	8.35455	8.35664	8.14704	7.98417	8.23542	9.09865	8.18426	8.21556	-0.914391	-0.883083	0.0313076	0.0561544	0.0622929	0.775991	1.25062	1.20556	0.110144	5	5	5
Tmem62	Transmembrane protein 62			5.28273	5.31718	4.77275		5.36792	6.0795	7.07962	6.35975		6.85846	6.53172	7.09577	7.4832	5.12422	6.2217	6.99229	1.09748	1.86807	0.77059	0.0564267	0.00112569	0.107028	1.24852	2.94858	0.970503	3	4	4
Colec12	Collectin-12			5.35855	3.99451					7.33808	7.63256	5.94858	8.38581	7.78618	7.55228	7.89336	4.67653	7.48532	7.51324	2.80879	2.83672	0.0279227	0.0565262	0.0150495	0.969609	1.24775	1.82248	0.0134032	2	2	5
Snx4	Sorting nexin-4	6.95061		7.17664	7.61447	8.10226	7.68583	8.65443	8.11667	8.6121		7.27898		8.79032			7.46099	8.26726	8.03465	0.806263	0.573651	-0.232612	0.0566141	0.392971	0.707155	1.24708	0.405639	0.150486	4	4	2
Guk1	Guanylate kinase	7.59763		7.60014	7.41075	7.48651	7.71732	7.50003	7.99542	7.7065	7.93424	8.01644	7.82695	7.91849	7.36118	7.50409	7.52376	7.7707	7.72543	0.246944	0.201674	-0.0452706	0.0568714	0.214398	0.775602	1.24511	0.66878	0.110361	4	5	5
Slc35b2	Adenosine 3'-phospho 5'-phosphosulfate transporter 1	8.28548	8.76968	8.53502	8.40603	9.11311	7.79782	8.94453	7.99	7.17876	6.83129	6.94033	6.91498	6.81355	6.86642	7.66816	8.62186	7.74848	7.04069	-0.873382	-1.58117	-0.707791	0.0569288	8.1917e-05	0.112777	1.24467	4.08663	0.94778	5	5	5
Vps35	Vacuolar protein sorting-associated protein 35	10.672	11.6771	10.4539	10.2568	10.5306	10.3598	10.201	9.85546	10.1587	10.109	10.3483	10.5746	10.4261	10.2434	10.4782	10.7181	10.1368	10.4141	-0.581298	-0.303973	0.277325	0.0573745	0.267849	0.0235963	1.24128	0.572111	1.62716	5	5	5
Gng13	Guanine nucleotide-binding protein G(I)/G(S)/G(O) subunit gamma-13			6.09313	5.32997	4.52121		6.23447		6.99657	6.71431	6.99966	7.14665	7.4415	6.80655	7.72663	5.31477	6.64845	7.2242	1.33368	1.90943	0.575746	0.0576567	0.00294353	0.077962	1.23915	2.53113	1.10812	3	3	5
Vps26a	Vacuolar protein sorting-associated protein 26A	9.20334	9.669	8.85563	8.5546	8.8695	8.8889	8.63856	8.2687	8.41726	8.53995	8.84928	8.97131	8.6663	8.25607	8.39159	9.03041	8.55067	8.62691	-0.47974	-0.403502	0.0762376	0.057829	0.121152	0.666803	1.23785	0.91667	0.176002	5	5	5
Ptprn2	Receptor-type tyrosine-protein phosphatase N2	10.5327	10.489	10.2008	10.0673	10.2161	10.6081	10.5295	10.3434	10.5212	10.6621	10.5261	10.5575	10.2747	10.7656	11.0639	10.3012	10.5328	10.6376	0.231672	0.336386	0.104714	0.0578577	0.0681331	0.483898	1.23764	1.16664	0.315246	5	5	5
Snrpd1	Small nuclear ribonucleoprotein Sm D1	8.95871		8.50118	8.68896	8.88391	8.39466	8.78876	8.28562	8.34784	7.91502	8.27261	8.13056	8.35759	7.79277	8.0393	8.75819	8.34638	8.11857	-0.411811	-0.639624	-0.227814	0.0579863	0.00294477	0.218193	1.23667	2.53095	0.66116	4	5	5
Pdxp	Chronophin	7.03311		7.84815	8.09052	7.95697	8.33706	8.78337	8.24868	8.09863	8.075	7.87977	8.11233	7.68741	7.83123	8.35768	7.73219	8.30855	7.97368	0.576357	0.241495	-0.334862	0.0581242	0.363106	0.090638	1.23564	0.439966	1.04269	4	5	5
Srrm1	Serine/arginine repetitive matrix protein 1			5.24713	4.80129	4.47731	5.90601		5.25437	5.39456	5.31909	5.55705	6.04804	5.53076	4.98601	5.52106	4.84191	5.46851	5.52858	0.626598	0.686674	0.0600759	0.0584316	0.0479353	0.802305	1.23335	1.31934	0.0956607	3	4	5
Lrtm2	Leucine-rich repeat and transmembrane domain-containing protein 2	8.06172		7.57607	7.7263	7.69779	8.06145	7.87073	7.96926	8.37006	8.04335	7.49237	8.27027	8.03846	8.39414	8.67163	7.76547	8.06297	8.17337	0.2975	0.407902	0.110402	0.0585602	0.137046	0.622275	1.2324	0.863135	0.206018	4	5	5
Ece1	Endothelin-converting enzyme 1	7.57665	6.43269	7.31585	7.21612	7.21861	7.48042	7.64431	7.61029	7.61732	7.53967	7.35008	7.4871	7.34605	7.73177	8.00218	7.15198	7.5784	7.58344	0.42642	0.431454	0.00503435	0.0589571	0.096532	0.969943	1.22946	1.01533	0.0132538	5	5	5
Dnm1l	Dynamin-1-like protein	10.7305	11.0444	10.5277	10.0501	10.5056	10.4309	9.99115	9.75427	10.2447	10.2352	10.006	10.3804	9.87158	9.34129	9.60068	10.5717	10.1312	9.83999	-0.440422	-0.731684	-0.291262	0.0590813	0.0159031	0.207396	1.22855	1.79852	0.683199	5	5	5
Psmb1	Proteasome subunit beta type-1	8.01377		8.33629	8.47691	9.03255	8.94417	9.95919	9.23168	8.85717	8.78555	8.43175	8.2141	8.13753	8.62715	8.51478	8.46488	9.15555	8.38506	0.690675	-0.0798119	-0.770487	0.0591233	0.719877	0.0108608	1.22824	0.142742	1.96414	4	5	5
Ppp1r9b	Neurabin-2	7.96157	8.09872	8.77146	8.2493	8.27291	8.36919	7.64062	7.60123	7.7608	7.84047	8.23899	7.4049	7.49351	7.39923	7.3783	8.27079	7.84246	7.58299	-0.428331	-0.687805	-0.259474	0.0591637	0.01255	0.262972	1.22794	1.90136	0.58009	5	5	5
Nipsnap1	Protein NipSnap homolog 1	9.39546	9.68229	9.42726	9.02356	9.40729	9.73503	9.53837	9.71553	9.49989	9.73609	9.57991	9.82017	9.41358	9.30219	9.28296	9.38717	9.64498	9.47976	0.257811	0.0925879	-0.165223	0.0591903	0.54164	0.181055	1.22775	0.266289	0.74219	5	5	5
Prkcz	Protein kinase C zeta type	9.48372	11.6894	9.12403	8.30254	10.0609	8.85242	9.30926	7.98215	7.73412	7.48789	8.74823	8.17904	8.28571	7.45752	7.50327	9.73212	8.27317	8.03475	-1.45895	-1.69736	-0.238415	0.0592185	0.0250826	0.590022	1.22754	1.60063	0.229132	5	5	5
Maip1	m-AAA protease-interacting protein 1, mitochondrial	6.78048		6.71779	6.04524	6.86254	6.83546	7.22742	7.64396	6.87412	7.0616	7.17289		6.41284			6.60151	7.12851	6.79287	0.526999	0.191351	-0.335648	0.0592314	0.628148	0.338617	1.22745	0.201938	0.470292	4	5	2
Cpne3	Copine-3	9.19555	10.2237	9.20055	9.17365	9.07904	9.03709	8.54355	8.87731	8.94913	8.93984	9.04983	9.38112	9.13421	9.63335	10.3395	9.37451	8.86938	9.50761	-0.505121	0.133102	0.638223	0.059233	0.683719	0.0323324	1.22744	0.165122	1.49036	5	5	5
Ptprz1	Receptor-type tyrosine-protein phosphatase zeta	9.09933	9.46982	9.04175	9.40834	9.2187	9.20944	9.53686	9.94094	9.56267	9.55859	9.32072	9.01465	9.41101	9.18568	8.95802	9.24759	9.5617	9.17801	0.314113	-0.069572	-0.383685	0.0593012	0.579449	0.0291225	1.22694	0.236985	1.53577	5	5	5
Eef1a2	Elongation factor 1-alpha 2	11.8239	12.3288	12.0025	11.6226	11.7023	11.506	11.5583	11.3189	11.7634	11.706	11.3637	12.3317	11.684	11.4992	11.7718	11.896	11.5705	11.7301	-0.32549	-0.165948	0.159542	0.0593536	0.449058	0.410929	1.22655	0.347697	0.386233	5	5	5
Ogfrl1	Opioid growth factor receptor-like protein 1	7.31222		7.4847	7.14965	7.33189	7.28417	7.76846	7.54305	7.89633	7.59749	7.35151	8.02618	7.47457	7.2349	7.43571	7.31961	7.6179	7.50457	0.298286	0.184958	-0.113328	0.0593938	0.302796	0.528401	1.22626	0.51885	0.277036	4	5	5
Uqcrh	Cytochrome b-c1 complex subunit 6, mitochondrial	9.77302	10.081	9.8398	9.08979	9.69991	9.96642	9.70897	10.6999	10.2456	10.5785	9.62594	9.81158	9.67935	9.0917	9.31729	9.6967	10.2399	9.50517	0.543176	-0.191529	-0.734705	0.0595018	0.389781	0.0118672	1.22547	0.409179	1.92565	5	5	5
Tmem168	Transmembrane protein 168	7.41644		6.92991	6.90417	7.00411	7.07835	6.79812	6.32131	6.59594	6.25834	6.48138	6.91924	6.57597	6.62988	7.11161	7.06366	6.61041	6.74362	-0.453246	-0.320042	0.133203	0.0595162	0.1011	0.507674	1.22536	0.99525	0.294415	4	5	5
Map1a	Microtubule-associated protein 1A	8.48448	9.41939	8.71136	9.01534	8.69294	9.14138	9.13212	9.18567	9.42269	9.33255	8.80241	8.72982	8.51998	8.75288	9.14664	8.8647	9.24288	8.79034	0.378184	-0.0743558	-0.452539	0.0595358	0.707891	0.00464675	1.22522	0.150033	2.33285	5	5	5
Zdhhc5	Palmitoyltransferase ZDHHC5	7.11261	7.93596	7.01949	7.00628	7.16516	6.85251	6.8582	6.98104	6.74164	6.84747	7.51567	7.32755	7.68692	7.8197	7.6247	7.2479	6.85617	7.59491	-0.391726	0.34701	0.738737	0.0596085	0.110255	4.00038e-05	1.22469	0.957601	4.3979	5	5	5
Gdi1	Rab GDP dissociation inhibitor alpha	8.2062	9.15575	8.25971	9.03134	8.36617	9.00755	9.47571	8.9974	8.98624	9.00258	8.70845	8.23047	8.3577	8.42853	9.11314	8.60383	9.09389	8.56766	0.49006	-0.0361759	-0.526236	0.0600625	0.891288	0.021142	1.2214	0.0499817	1.67485	5	5	5
Etfa	Electron transfer flavoprotein subunit alpha, mitochondrial	7.58652	8.78209	7.31399	7.43031	7.62964	8.24529	8.36333	8.33464	8.31395	8.38542	7.8354	8.09443	7.95294	7.48371	7.3837	7.74851	8.32853	7.75004	0.580015	0.00152571	-0.578489	0.0604656	0.996035	0.00309707	1.21849	0.00172559	2.50905	5	5	5
Rida	2-iminobutanoate/2-iminopropanoate deaminase	7.08218		7.34177	7.71552	7.47821	8.18743	8.47386	8.03233	7.83126	7.30135	7.17909	7.4568	7.22341	7.19735	7.91255	7.40442	7.96525	7.39384	0.560823	-0.0105846	-0.571407	0.0607072	0.958414	0.0449216	1.21676	0.0184467	1.34754	4	5	5
Cops5	COP9 signalosome complex subunit 5	7.35295		7.14559	7.2291	7.20555	7.45158	7.3707	7.45337	7.19527	7.48532	7.0587	7.41177	6.3382	6.98244	6.51051	7.2333	7.39125	6.86033	0.157951	-0.372972	-0.530923	0.0608895	0.1389	0.0296866	1.21546	0.857298	1.52744	4	5	5
Cnih2	Protein cornichon homolog 2	8.4275	9.79232	8.03201	8.30968	8.36155	7.80657	8.46565	7.49183	7.73225	7.5654	8.03142	7.87017	8.34818	8.26643	8.30542	8.58461	7.81234	8.16432	-0.772271	-0.420288	0.351983	0.0609052	0.228976	0.109658	1.21535	0.640211	0.959961	5	5	5
Ctps2;Ctps1	CTP synthase 2;CTP synthase 1	8.04375		7.56157	7.79647	8.08189	8.14106		8.11918	8.41523	8.11022	7.91881	8.10696	7.98468	7.95604	8.06808	7.87092	8.19642	8.00691	0.325502	0.135992	-0.18951	0.0609462	0.269648	0.040612	1.21505	0.569203	1.39135	4	4	5
Nos1ap	Carboxyl-terminal PDZ ligand of neuronal nitric oxide synthase protein	6.51172		7.41029	7.37212	7.44333	6.73658	6.3417	6.64646	6.90248	6.78984	7.33941	7.70874	7.41231	7.63584	7.91579	7.18436	6.68341	7.60242	-0.500953	0.418057	0.919009	0.0611099	0.111749	0.000182386	1.21389	0.951756	3.73901	4	5	5
Hdhd2	Haloacid dehalogenase-like hydrolase domain-containing protein 2	6.40862		7.02673	7.59909	6.75711	7.11654	7.55446	7.44505	7.86774	7.6828	7.51665	7.38828	7.20792	7.76623	8.31631	6.94789	7.53332	7.63908	0.585432	0.691192	0.10576	0.0611132	0.0610816	0.657389	1.21387	1.21409	0.182178	4	5	5
Rbm14	RNA-binding protein 14	6.90293		6.99328	6.55861	7.31767	6.69908	6.63205	6.70084	6.26699	6.58266	7.36698	7.38768	6.80516	7.13724	7.03321	6.94312	6.57632	7.14605	-0.366798	0.202934	0.569732	0.0611664	0.307313	0.00294063	1.21349	0.512418	2.53156	4	5	5
Hadha	Trifunctional enzyme subunit alpha, mitochondrial	8.63144	8.92251	8.34315	8.03758	8.51402	8.81928	8.79502	8.96258	8.79687	8.73069	8.38342	8.84788	8.61484	8.31594	8.60103	8.48974	8.82089	8.55262	0.331149	0.0628798	-0.268269	0.0612796	0.728541	0.0300034	1.21268	0.137546	1.52283	5	5	5
Tmem9	Proton-transporting V-type ATPase complex assembly regulator TMEM9	5.37122		6.20136	5.9634	5.59554	6.34479	7.24915	5.94663	6.34059	6.30801	6.74801	6.47537	6.66232	7.19263	7.61462	5.78288	6.43784	6.93859	0.654958	1.15571	0.500756	0.0613381	0.00481511	0.132063	1.21227	2.31739	0.879218	4	5	5
Pde10a	cAMP and cAMP-inhibited cGMP 3',5'-cyclic phosphodiesterase 10A	10.427	11.1859	10.2177	10.5623	10.6545	10.9251	11.1562	11.23	11.032	10.7179	11.0764	10.6913	10.9209	11.0795	11.4019	10.6095	11.0123	11.034	0.402784	0.424514	0.0217302	0.0613676	0.0655641	0.886137	1.21206	1.18333	0.052499	5	5	5
Tmem59	Transmembrane protein 59	7.62325		6.91723	7.1526	6.88844	7.12484	6.35038	6.51638	6.6284	6.76455	7.18661	7.10834	7.21314	7.22058	7.16879	7.14538	6.67691	7.17949	-0.468468	0.0341142	0.502582	0.0614171	0.82768	0.00528814	1.21171	0.0821374	2.2767	4	5	5
Ubb;Ubc	Polyubiquitin-B;Polyubiquitin-C	12.316	12.2415	12.1864	12.2471	12.3231	12.5978	13.023	12.4971	13.7267	12.2724	11.9123	12.5562	11.7096	12.8189	13.0242	12.2628	12.8234	12.4043	0.560614	0.141454	-0.41916	0.0614216	0.596511	0.280284	1.21168	0.224382	0.552402	5	5	5
Hhatl	Protein-cysteine N-palmitoyltransferase HHAT-like protein	9.45987	7.52375	8.58517	8.42378	8.3689	8.75264	9.58388	9.31509	9.22252	9.14402	9.06677	9.14335	9.32519	9.90763	10.4332	8.47229	9.20363	9.57522	0.731338	1.10293	0.371592	0.0615178	0.0256884	0.240558	1.211	1.59026	0.61878	5	5	5
Cldn11	Claudin-11	8.8688	7.78602	8.5866	9.07796	9.07281	9.28752	9.6413	9.35605	8.94361	9.08182	9.09766	9.2851	9.26992	9.30034	9.70148	8.67844	9.26206	9.3309	0.583625	0.652464	0.0688385	0.0615821	0.036543	0.670371	1.21055	1.4372	0.173685	5	5	5
Septin5	Septin-5	9.55561	10.179	9.39724	9.53834	9.62783	9.91244	9.96533	10.0487	9.96136	9.90434	9.54258	9.7478	9.51797	9.69046	9.72461	9.65961	9.95842	9.64469	0.298815	-0.0149238	-0.313739	0.0615884	0.919626	0.000412364	1.2105	0.0363889	3.38472	5	5	5
Uxs1	UDP-glucuronic acid decarboxylase 1	8.52986	9.55443	8.21405	8.10033	8.39313	7.93164	7.98445	7.84876	8.22538	7.90232	8.05179	8.42889	8.42791	8.51504	9.0071	8.55836	7.97851	8.48615	-0.579852	-0.0722156	0.507637	0.0622852	0.816632	0.015778	1.20561	0.0879737	1.80195	5	5	5
Tmem35a	Novel acetylcholine receptor chaperone	9.21342	8.91672	8.85201	8.75227	9.01096	9.17898	9.52533	9.15787	9.28461	8.93672	9.00061	8.88273	9.46549	9.2149	9.3581	8.94907	9.2167	9.18437	0.267628	0.235291	-0.0323372	0.0624502	0.116603	0.82862	1.20447	0.933291	0.0816445	5	5	5
Krt23	Keratin, type I cytoskeletal 23			7.25914	6.74805	7.6382		8.83282		8.07795	7.80983			7.53995			7.21513	8.2402	7.53995	1.02507	0.324826	-0.700245	0.0626229	#DIV/0!	#DIV/0!	1.20327	#DIV/0!	#DIV/0!	3	3	1
Chl1	Neural cell adhesion molecule L1-like protein	7.5574	8.27148	7.4379	7.41967	7.58899	7.97893	8.00554	8.00733	7.9234	8.08632	7.66513	7.53475	7.67465	7.6536	7.4415	7.65509	8.0003	7.59393	0.345214	-0.0611638	-0.406378	0.0626712	0.718973	5.75182e-05	1.20293	0.143287	4.24019	5	5	5
Grm2	Metabotropic glutamate receptor 2	12.0602	12.6052	12.3704	12.521	12.4916	11.9732	12.2352	12.3013	12.2303	12.1028	12.3535	12.3019	12.5064	12.7751	12.4788	12.4097	12.1686	12.4831	-0.241128	0.0734388	0.314567	0.0628415	0.575432	0.0143134	1.20175	0.240006	1.84426	5	5	5
Cntnap2	Contactin-associated protein-like 2	8.95006	9.01695	8.93776	9.26059	9.03759	9.04395	9.19284	9.3148	9.31934	9.16865	9.18691	9.17733	9.2828	9.52117	9.38941	9.04059	9.20792	9.31152	0.167325	0.270932	0.103608	0.0629782	0.0145197	0.245794	1.20081	1.83804	0.60943	5	5	5
Mios	GATOR complex protein MIOS	8.28455	8.17241	8.15386	8.03804	8.10601	7.95172	8.26872	7.8128	7.90811	7.75575	8.12598	7.83673	7.96165	7.88661	8.20485	8.15097	7.93942	8.00316	-0.211556	-0.147809	0.0637463	0.0631006	0.106185	0.590067	1.19997	0.973935	0.229098	5	5	5
Prdx4	Peroxiredoxin-4	7.28076		6.5049	6.28306	6.85596	6.96278	7.37708	7.32183	7.34319	7.02789	6.66761	7.21768	6.7801	7.21774	7.38963	6.73117	7.20655	7.05455	0.475384	0.323382	-0.152002	0.0631165	0.234245	0.383228	1.19986	0.630329	0.416543	4	5	5
Uqcrc1	Cytochrome b-c1 complex subunit 1, mitochondrial	12.7712	13.3158	12.7991	12.0831	12.775	12.6872	13.4949	13.6442	13.2719	13.4077	12.7564	13.1816	12.7791	12.8831	12.9893	12.7488	13.3012	12.9179	0.55233	0.169048	-0.383282	0.063193	0.445966	0.0688208	1.19933	0.350699	1.16228	5	5	5
Prdx2	Peroxiredoxin-2	9.38933	10.5627	9.58924	9.71884	9.73226	9.78796	10.7782	10.3914	10.4009	10.3807	9.27802	10.1601	9.13586	10.1066	10.7102	9.79848	10.3478	9.87817	0.549338	0.0796855	-0.469652	0.0641688	0.82871	0.198088	1.19268	0.0815972	0.703142	5	5	5
Slc12a9	Solute carrier family 12 member 9	9.05908	8.95957	7.99904	8.1801	9.2442	8.59877	8.28089	7.95078	7.70006	7.42051	8.03716	7.6078	7.78952	7.69473	8.51813	8.6884	7.9902	7.92947	-0.698193	-0.758927	-0.0607334	0.0642532	0.0348719	0.824288	1.19211	1.45752	0.083921	5	5	5
Frmpd4	FERM and PDZ domain-containing protein 4			4.68795	4.48545	3.26378				6.03039	5.64986	5.88246	6.61262	5.77429	6.15947	6.75469	4.14572	5.84013	6.23671	1.6944	2.09098	0.39658	0.064341	0.00237436	0.296464	1.19151	2.62445	0.528028	3	2	5
Psmd2	26S proteasome non-ATPase regulatory subunit 2	9.60349	10.0098	9.53514	9.07473	9.38841	9.28205	9.17267	8.89331	9.27862	9.18737	9.25057	9.68979	9.41983	8.85892	9.1329	9.52232	9.16281	9.2704	-0.359517	-0.251922	0.107595	0.0646207	0.256367	0.510338	1.18963	0.591138	0.292142	5	5	5
Nop58	Nucleolar protein 58			4.29073	3.23115	3.77794		4.42308	4.46139	4.47524	4.21606	4.18141	5.46317	5.06126	4.7964	5.31258	3.76661	4.39394	4.96296	0.627335	1.19636	0.569021	0.0646782	0.0188338	0.0660891	1.18924	1.72506	1.17987	3	4	5
Grm5	Metabotropic glutamate receptor 5	10.027	10.6762	9.94063	10.4246	10.2576	9.81389	10.1581	9.96677	9.98412	9.8238	10.0385	9.6909	10.074	10.2731	10.3593	10.2652	9.94933	10.0871	-0.315882	-0.178066	0.137815	0.0647505	0.343152	0.326242	1.18876	0.464514	0.486461	5	5	5
Cp	Ceruloplasmin	8.68312	8.85899	8.68513	8.54059	8.26179	8.55591	8.28634	8.1134	8.32764	8.4216	8.45333	8.32145	8.14773	8.36141	8.67231	8.60592	8.34098	8.39125	-0.264947	-0.214676	0.0502711	0.0647969	0.141735	0.668309	1.18845	0.848524	0.175023	5	5	5
Pitpnm1	Membrane-associated phosphatidylinositol transfer protein 1	8.32442	7.91814	8.20722	8.14227	8.48734	8.05183	8.08802	7.67781	7.97914	8.00375	8.29478	8.58033	8.42204	7.84581	8.09895	8.21588	7.96011	8.24838	-0.255768	0.0325053	0.288274	0.0650261	0.843255	0.085954	1.18691	0.0740412	1.06573	5	5	5
Crip2	Cysteine-rich protein 2	6.6134		6.67297	7.04151	6.671	7.30004	6.58353	7.33055	7.20515	7.36729	6.45365	6.0318	5.90993	5.87535	6.15397	6.74972	7.15731	6.08494	0.407592	-0.664782	-1.07237	0.0652578	0.00267584	0.000332285	1.18537	2.57254	3.47849	4	5	5
Uckl1	Uridine-cytidine kinase-like 1			6.46413	6.36633	6.30161		7.40754	6.646	6.81839	6.66258	6.57347	7.16914	6.81518	6.42758	6.40929	6.37736	6.88363	6.67893	0.506271	0.301576	-0.204695	0.0654748	0.169272	0.393892	1.18393	0.771415	0.404623	3	4	5
S100b	Protein S100-B			6.18937	5.63119	5.79464		7.39763	5.96296	7.58222	6.80185	6.57273	6.81219	6.59318	6.06711	7.43199	5.87173	6.93617	6.69544	1.06443	0.823706	-0.240729	0.0656502	0.0414176	0.572452	1.18276	1.38282	0.242261	3	4	5
Syngr1	Synaptogyrin-1	13.9932	15.9834	13.8414	13.6561	13.9748	13.6236	14.0459	12.9528	12.6353	12.8252	13.4551	13.3467	13.4762	13.1737	12.4855	14.2898	13.2166	13.1874	-1.0732	-1.10233	-0.0291316	0.0656843	0.0453395	0.930365	1.18254	1.34352	0.0313466	5	5	5
Slc13a3	Na(+)/dicarboxylate cotransporter 3	7.70564	8.13953	7.5363	7.53446	7.01477	7.35932	6.56549	7.09875	7.39564	7.01392	7.12025	7.40232	7.24789	7.85924	8.41504	7.58614	7.08662	7.60895	-0.499517	0.0228083	0.522326	0.0656998	0.940877	0.099385	1.18244	0.0264672	1.00268	5	5	5
Spns1	Protein spinster homolog 1	8.98599	9.35555	8.17662	8.34241	8.02925	8.31438	7.87811	7.84573	8.07823	7.91539	8.43971	8.58526	8.54602	8.72776	8.88982	8.57796	8.00637	8.63772	-0.571594	0.0597534	0.631348	0.0657227	0.827636	0.000640027	1.18228	0.0821608	3.1938	5	5	5
Reck	Reversion-inducing cysteine-rich protein with Kazal motifs	7.3769	8.28102	7.33589	7.26933	7.13581	7.29112	6.95935	6.80768	7.04707	6.95663	7.28607	7.06297	7.05676	6.85934	7.35439	7.47979	7.01237	7.12391	-0.467421	-0.355885	0.111535	0.0657328	0.148987	0.376958	1.18222	0.82685	0.423708	5	5	5
Cops6	COP9 signalosome complex subunit 6	7.01627		7.38729	7.51909	7.75125	7.60696	7.75524	7.68984	7.80779	7.76566	7.23242	7.87705	7.46745	7.53945	7.80785	7.41847	7.7251	7.58484	0.306622	0.16637	-0.140252	0.0657968	0.409158	0.285059	1.1818	0.388109	0.545065	4	5	5
Dmwd	Dystrophia myotonica WD repeat-containing protein	7.83781	8.55841	7.71727	7.55713	7.78558	7.38629	7.48819	7.15518	7.59804	7.71896	7.98166	7.9166	7.86829	7.79143	7.98845	7.89124	7.46933	7.90929	-0.421908	0.0180462	0.439955	0.0659526	0.9214	0.00271046	1.18077	0.0355518	2.56696	5	5	5
Nmt1	Glycylpeptide N-tetradecanoyltransferase 1	6.46049		6.26136	5.7079	6.24813	6.07535	6.82648	6.63006	6.85831	7.15981	6.11112	7.1899	6.72517	6.96061	7.19054	6.16947	6.71	6.83547	0.540528	0.665994	0.125466	0.0659835	0.0418513	0.6538	1.18056	1.37829	0.184555	4	5	5
Pof1b	Protein POF1B			9.07407		7.74997		9.76441		10.2049	9.76086			9.83431	9.58916	10.1762	8.41202	9.91006	9.86655	1.49804	1.45453	-0.0435042	0.0660589	0.0742464	0.856224	1.18007	1.12932	0.0674125	2	3	3
Atp5pb	ATP synthase F(0) complex subunit B1, mitochondrial	11.3116	11.9518	11.1885	10.6384	11.3121	11.258	12.1076	12.3713	11.671	12.0163	11.2583	12.1758	11.6099	11.8767	11.9577	11.2805	11.8848	11.7757	0.604364	0.495184	-0.10918	0.0661512	0.0953277	0.672741	1.17946	1.02078	0.172152	5	5	5
Abr	Active breakpoint cluster region-related protein	8.93031	10.0276	8.71947	8.43769	8.86601	8.72703	8.51931	8.34685	8.14496	8.10825	8.24376	8.26836	7.96583	7.53234	7.42027	8.99622	8.36928	7.88611	-0.626945	-1.11011	-0.483168	0.066447	0.00896825	0.0514357	1.17752	2.04729	1.28874	5	5	5
Slc9a1	Sodium/hydrogen exchanger 1	7.66667		8.04847	7.96545	7.71997	7.75907	8.33499	8.13466	8.6375	8.40483	8.20664	8.45007	8.55915	8.68325	9.05249	7.85014	8.25421	8.59032	0.404072	0.740184	0.336113	0.0665086	0.00426095	0.136678	1.17712	2.37049	0.864302	4	5	5
Sin3b	Paired amphipathic helix protein Sin3b	9.44659	7.85534	8.80515	9.41553	8.60748	8.10909	4.45113	6.79401	8.31037	8.12631	8.76161	8.89474	8.4286	9.6809	9.59398	8.82602	7.15818	9.07197	-1.66784	0.245947	1.91378	0.0665975	0.536981	0.0375236	1.17654	0.270041	1.4257	5	5	5
Abcg2	Broad substrate specificity ATP-binding cassette transporter ABCG2	10.4649	11.7816	10.3984	10.6586	10.4851	10.2888	10.5597	10.0726	9.95337	9.8484	10.0922	10.1469	10.0264	10.5545	10.1968	10.7577	10.1446	10.2033	-0.613127	-0.554362	0.0587646	0.0666377	0.0789746	0.717858	1.17628	1.10251	0.143962	5	5	5
Taok2	Serine/threonine-protein kinase TAO2	8.23082		8.41267	8.49399	8.38574	8.50059	8.46184	8.48143	8.86522	8.86081	8.90388	9.06456	9.09905	9.49076	9.52255	8.3808	8.63398	9.21616	0.253173	0.835357	0.582185	0.0667309	0.000773121	0.00553273	1.17567	3.11175	2.25706	4	5	5
Cnot1	CCR4-NOT transcription complex subunit 1	6.75865	8.97475	7.37464	7.00999	7.54589	6.74456	6.32815	6.44518	6.97691	6.87236	7.10871	7.96124	7.28208	6.7512	7.30291	7.53278	6.67343	7.28123	-0.859351	-0.251556	0.607794	0.0667866	0.577304	0.0309587	1.17531	0.238595	1.50922	5	5	5
Hbb-b2	Hemoglobin subunit beta-2			5.978	5.60337				6.21189	6.2411	6.14134	6.07929	5.99669				5.79068	6.19811	6.03799	0.407427	0.247305	-0.160121	0.0670403	0.326291	0.047053	1.17366	0.486394	1.32741	2	3	2
Cs	Citrate synthase, mitochondrial	10.3064	8.82652	9.82391	9.67797	10.1659	10.3318	10.7639	10.6256	10.0863	10.0986	9.83624	9.72585	9.67417	9.23144	9.54884	9.76015	10.3813	9.60331	0.621103	-0.156843	-0.777946	0.0671059	0.589908	0.001936	1.17324	0.229216	2.71309	5	5	5
Gm10318;Gm3233	Predicted gene 10318;Predicted gene 3233	3.00837	4.20316		2.12781	3.47353	2.61977	2.0628	2.3082	2.20269	2.50837	2.82778		2.19657	2.38995	0.598403	3.20322	2.34037	2.00317	-0.862851	-1.20004	-0.337193	0.0671071	0.115477	0.470785	1.17323	0.937505	0.327177	4	5	4
Syt12	Synaptotagmin-12	8.79016	10.2615	8.83624	8.11976	8.86946	8.58701	8.31657	8.1312	8.06314	7.84486	8.34495	8.39455	7.95794	7.84741	7.90943	8.97542	8.18856	8.09086	-0.786864	-0.884564	-0.0977002	0.0671497	0.0432014	0.581587	1.17296	1.3645	0.235385	5	5	5
Tmem145	Transmembrane protein 145	7.92662	9.38744	7.91715	8.04434	7.84819	7.63877	6.88477	7.28094	7.7894	7.87764	8.33064	7.96231	8.51619	8.07692	7.97205	8.22475	7.4943	8.17162	-0.730444	-0.0531244	0.677319	0.0671679	0.869006	0.0130403	1.17284	0.0609772	1.88471	5	5	5
Kcnj6;Kcnj5	G protein-activated inward rectifier potassium channel 2;G protein-activated inward rectifier potassium channel 4	9.56511		10.2109	10.0688	10.4193	9.66911	9.31847	9.97587	9.59524	9.6176	9.95253	9.83249	9.79362	10.1904	10.0629	10.066	9.63526	9.96638	-0.43075	-0.0996318	0.331119	0.0671719	0.597191	0.0321105	1.17281	0.223887	1.49335	4	5	5
Pygl	Glycogen phosphorylase, liver form	7.57056		7.45207	7.30206	7.46105	7.34954	6.80115	7.08617	7.36167	7.24908	7.54855	7.90117	7.56678	7.505	7.55531	7.44644	7.16952	7.61536	-0.276914	0.168924	0.445838	0.0672424	0.119061	0.00795651	1.17236	0.92423	2.09928	4	5	5
Ppia	Peptidyl-prolyl cis-trans isomerase A	9.96901	11.1475	10.2254	10.7283	10.4557	10.6818	11.3839	10.9134	11.1011	10.9274	10.4554	10.2335	10.1631	10.4485	10.9675	10.5052	11.0015	10.4536	0.496338	-0.0515939	-0.547932	0.0674252	0.840237	0.0171553	1.17118	0.0755983	1.7656	5	5	5
Slc41a3	Solute carrier family 41 member 3	6.75002	5.4612	6.75235	6.36224	6.04538	7.03405	6.85746	6.91661	6.64389	6.61574	6.88819	7.02686	6.77493	7.36985	7.99042	6.27424	6.81355	7.21005	0.539312	0.935813	0.396501	0.0677519	0.0210605	0.12787	1.16908	1.67653	0.893232	5	5	5
Dipk2a	Divergent protein kinase domain 2A	6.90992	7.3444	7.02728	6.69487	6.6724	6.66148	6.59786	6.41671	6.82576	6.67221	6.63457	6.92148	6.87827	7.06613	7.48464	6.92977	6.6348	6.99702	-0.294969	0.0672446	0.362214	0.067842	0.728009	0.047781	1.1685	0.137863	1.32075	5	5	5
Snca	Alpha-synuclein	7.53185	8.7204	7.67862	8.64548	7.54127	8.14541	8.77033	8.58258	8.95096	8.9176	8.28266	8.16593	8.09178	8.73585	9.11826	8.02352	8.67338	8.4789	0.649854	0.455373	-0.19448	0.0679727	0.209495	0.449068	1.16767	0.678827	0.347688	5	5	5
Rer1	Protein RER1	9.60142	10.6153	9.25802	9.20997	8.9588	8.82955	9.0001	8.52746	9.0814	8.98002	9.34007	9.72608	9.92864	10.4572	11.1753	9.52871	8.88371	10.1254	-0.644996	0.596742	1.24174	0.0683825	0.203452	0.00580491	1.16506	0.691538	2.2362	5	5	5
Hspa4	Heat shock 70 kDa protein 4	9.29577	10.3734	9.31819	9.63553	9.53826	9.95308	10.2665	10.0843	10.0822	9.93027	9.45198	9.30868	9.27521	9.34186	9.49529	9.63224	10.0633	9.37461	0.431025	-0.25763	-0.688655	0.0688602	0.235266	1.36489e-05	1.16203	0.628441	4.8649	5	5	5
Rtcb	RNA-splicing ligase RtcB homolog	9.00065	10.0198	8.9623	8.79976	9.03617	8.69787	8.94556	8.64485	8.60065	8.52023	8.79468	8.72983	8.67498	8.20489	8.42858	9.16374	8.68183	8.56659	-0.481903	-0.597142	-0.115239	0.0688799	0.0399994	0.405303	1.16191	1.39795	0.39222	5	5	5
Mapre2	Microtubule-associated protein RP/EB family member 2	8.82359	8.46362	9.09219	9.08379	8.99008	8.5157	8.55596	8.53115	8.71187	8.78389	8.98169	9.11644	8.71013	8.31489	8.53364	8.89065	8.61971	8.73136	-0.270938	-0.159295	0.111643	0.0689101	0.418818	0.492562	1.16172	0.377975	0.307539	5	5	5
Fam120c	Constitutive coactivator of PPAR-gamma-like protein 2	7.7276	8.82043	7.35538	7.18509	7.45934	7.25454	7.16247	6.86869	7.09193	7.03866	7.24867	7.96309	7.74757	7.6064	7.98782	7.70957	7.08326	7.71071	-0.626311	0.00114003	0.627451	0.0690768	0.997255	0.0030654	1.16067	0.0011937	2.51351	5	5	5
Jph1	Junctophilin-1	5.46265	5.79107	5.95145	6.47643	5.75822	5.40701		4.96139	5.73532	5.42876	6.32627	5.71695	5.8168	6.04608	6.28577	5.88796	5.38312	6.03837	-0.504844	0.150408	0.655252	0.0691611	0.487441	0.0125341	1.16014	0.312078	1.90191	5	4	5
Cyp4f15	Cytochrome P450 CYP4F15	6.58996		7.0932	6.83222	6.91179	7.0452	7.45301	7.09441	6.96559	7.13856	7.20153	7.18698	7.25404	7.6302	7.99809	6.85679	7.13935	7.45417	0.28256	0.597373	0.314813	0.0692213	0.0210528	0.116854	1.15976	1.67669	0.932358	4	5	5
Mark3	MAP/microtubule affinity-regulating kinase 3	6.46003	8.02338	6.64059	6.44367	6.65271	6.11443	6.61608	6.01282	6.10442	6.03646	6.23168	6.66661	6.39721	6.09713	6.27669	6.84408	6.17684	6.33386	-0.667234	-0.510213	0.157022	0.0692848	0.141884	0.317129	1.15936	0.848065	0.498764	5	5	5
Psmd7	26S proteasome non-ATPase regulatory subunit 7	9.17726	9.86372	8.90124	8.60003	8.99066	8.77761	8.57786	8.51942	8.73913	8.6525	8.9766	9.13932	8.87012	8.16404	8.4676	9.10658	8.65331	8.72354	-0.453275	-0.383045	0.07023	0.0695549	0.20313	0.713884	1.15767	0.692225	0.146373	5	5	5
Egfr	Epidermal growth factor receptor	8.64831	7.30511	8.82091	8.90115	8.34798	9.1372	8.72755	9.11089	9.02937	9.1773	9.11026	8.93584	9.10834	9.65717	9.89824	8.40469	9.03646	9.34197	0.63177	0.937276	0.305506	0.0696987	0.0262152	0.168171	1.15678	1.58145	0.77425	5	5	5
Cct2	T-complex protein 1 subunit beta	8.94087	9.60126	8.94691	8.99871	9.16188	9.25152	9.52967	9.3273	9.5962	9.40547	8.94936	9.31425	8.95281	8.8014	9.15795	9.12993	9.42203	9.03516	0.292106	-0.0947721	-0.386878	0.0697849	0.554188	0.00787946	1.15624	0.256343	2.1035	5	5	5
Atp5mk	ATP synthase membrane subunit K, mitochondrial	9.63095	9.61837	9.03899	8.57717	9.39809	9.45428	9.99429	10.3229	9.35637	9.95038	9.19167	9.97544	9.42075	9.98934	9.96337	9.25272	9.81565	9.70812	0.562936	0.4554	-0.107536	0.0698544	0.11946	0.674024	1.15581	0.922779	0.171325	5	5	5
Set	Protein SET	6.1891		6.60143	6.54206	7.11143	7.24198	7.85193	6.8597	7.33719	6.7401	6.43256	6.04645	6.17351	6.17742	6.70944	6.611	7.20618	6.30787	0.595176	-0.303131	-0.898307	0.0698872	0.199867	0.00444922	1.1556	0.699259	2.35172	4	5	5
Tubgcp2	Gamma-tubulin complex component 2	5.95169		6.49671	6.58043	6.37347		7.09245	6.29019	7.32474	7.01202	6.96998	7.69155	7.57574	6.91042	7.02561	6.35057	6.92985	7.23466	0.579276	0.884088	0.304812	0.0701216	0.00550584	0.297743	1.15415	2.25918	0.526159	4	4	5
Camk2a	Calcium/calmodulin-dependent protein kinase type II subunit alpha	12.9173	13.7785	12.7062	13.0679	13.2323	12.366	12.609	12.9967	12.7991	12.7446	13.0844	13.2261	13.0982	12.9954	13.0311	13.1404	12.7031	13.087	-0.43734	-0.0533867	0.383953	0.0704143	0.781114	0.00895768	1.15234	0.107286	2.0478	5	5	5
Uqcrb	Cytochrome b-c1 complex subunit 7	10.013	10.4809	9.90351	9.29072	9.99881	10.1163	10.4684	10.7282	10.1877	10.4788	9.86623	10.1638	10.0291	9.93282	9.7643	9.93739	10.3959	9.95124	0.458502	0.0138427	-0.444659	0.0706932	0.947107	0.00906725	1.15062	0.0236008	2.04252	5	5	5
Cmtm4	CKLF-like MARVEL transmembrane domain-containing protein 4	8.80005	10.7849	8.80389	8.74365	9.10146	8.36633	8.86172	8.41473	8.26632	8.0337	8.53858	8.32963	8.56656	8.88872	8.88998	9.24678	8.38856	8.64269	-0.858221	-0.604088	0.254133	0.0710037	0.173654	0.181219	1.14872	0.760315	0.741796	5	5	5
Atp5po	ATP synthase subunit O, mitochondrial	11.1344	11.2221	10.5006	10.0548	11.0929	11.0053	11.8546	11.7903	11.0217	11.3493	10.7045	11.3537	10.6601	10.7989	10.7666	10.801	11.4042	10.8568	0.603268	0.0557748	-0.547493	0.0710306	0.834851	0.038557	1.14855	0.0783912	1.4139	5	5	5
Praf2	PRA1 family protein 2	8.28983	8.02902	7.71133	7.59192	7.86178	8.38101	8.29078	8.43335	8.06236	7.9338	7.58403	7.6445	7.59545	8.15924	7.91005	7.89678	8.22026	7.77865	0.323483	-0.118124	-0.441607	0.0711153	0.4973	0.0171965	1.14804	0.303381	1.76456	5	5	5
Ptprg	protein-tyrosine-phosphatase;Receptor-type tyrosine-protein phosphatase gamma	7.56527		7.82903	8.04865	7.50592	7.25049	6.87335	7.28106	7.61605	7.62396	7.9887	7.93967	8.05094	8.37281	8.5395	7.73722	7.32898	8.17832	-0.408236	0.441108	0.849344	0.0711655	0.0381685	0.00161235	1.14773	1.4183	2.79254	4	5	5
Scarb2	Lysosome membrane protein 2	10.081	10.7193	9.21799	9.73067	9.92429	9.52022	9.73049	9.42656	9.09159	9.00575	9.06858	9.03982	8.91419	9.40524	9.90944	9.93465	9.35492	9.26745	-0.579724	-0.66719	-0.0874666	0.0713748	0.0590064	0.70755	1.14646	1.2291	0.150243	5	5	5
Uprt	Uracil phosphoribosyltransferase homolog	7.02477	8.49573	7.01601	7.09565	6.94412	7.00819	6.65147	6.41201	6.34097	6.828	7.15891	7.18007	6.84957	6.56022	6.50558	7.31526	6.64813	6.85087	-0.667128	-0.464384	0.202743	0.0715684	0.195373	0.316159	1.14528	0.709135	0.500095	5	5	5
Kcnt2	Potassium channel, subfamily T, member 2	7.08002	8.56786	6.95347	7.51525	7.30228	6.67394	7.10624	6.64016	7.04975	6.80587	7.13064	7.32122	7.56518	8.16629	7.8082	7.48377	6.85519	7.5983	-0.628582	0.11453	0.743112	0.0717002	0.74514	0.0068428	1.14448	0.127762	2.16477	5	5	5
Ccdc47	PAT complex subunit CCDC47	8.39194	8.6239	8.10318	8.09927	8.38235	8.26878	8.90836	8.8757	8.81271	8.43055	8.19027	8.37346	8.45222	8.71007	8.71599	8.32013	8.65922	8.4884	0.339091	0.168273	-0.170817	0.0717295	0.269029	0.329598	1.1443	0.5702	0.482016	5	5	5
Klhl26	Kelch-like protein 26	6.41993	7.85764	6.11367	6.17895	6.2164	5.93625	5.42752	5.71459	5.97733	6.10205	6.09938	7.1903	6.5841	7.22791	7.96727	6.55732	5.83155	7.01379	-0.725773	0.456473	1.18225	0.0717377	0.346892	0.00814495	1.14425	0.459805	2.08911	5	5	5
Arf3;Arf1	ADP-ribosylation factor 3;ADP-ribosylation factor 1	11.4325	12.4861	10.9266	11.001	11.1766	10.8903	11.2673	10.2195	10.6458	10.5428	10.9136	11.5014	11.1566	10.7048	11.3985	11.4046	10.7131	11.135	-0.691416	-0.269602	0.421814	0.072129	0.424405	0.103445	1.14189	0.372219	0.98529	5	5	5
Emc10	ER membrane protein complex subunit 10	5.9757		5.87078	5.76349	5.43847	5.77148	5.94972	6.27432	6.83214	6.50642	6.06599	6.43547	6.58614	7.49513	8.16701	5.76211	6.26682	6.94995	0.504706	1.18784	0.683131	0.0721678	0.0328129	0.149917	1.14166	1.48396	0.824149	4	5	5
Bmpr2	Bone morphogenetic protein receptor type-2	7.59465	8.29751	8.03187	8.03475	8.32672	8.25419	8.62122	8.37906	8.38277	8.20191	8.09361	8.11439	8.11328	8.04021	7.96643	8.0571	8.36783	8.06558	0.310732	0.00848374	-0.302248	0.0721809	0.951226	0.00462765	1.14158	0.0217162	2.33464	5	5	5
Hnrnpul2	Heterogeneous nuclear ribonucleoprotein U-like protein 2	7.77135		7.60108	7.19769	7.78471	7.29475	7.26215	6.74534	7.5401	7.06441	7.5711	7.57734	7.43812	7.24744	7.37767	7.58871	7.18135	7.44234	-0.407356	-0.146372	0.260984	0.0721829	0.328256	0.11256	1.14157	0.483787	0.948614	4	5	5
Daam2	Disheveled-associated activator of morphogenesis 2	7.70664		7.52834	7.54856	7.64321	7.63544	7.39325	7.33074	7.52785	7.33209	7.67839	7.92721	7.71754	7.81508	7.81814	7.60669	7.44388	7.79127	-0.162815	0.184582	0.347397	0.0725768	0.0198692	0.0015537	1.1392	1.70182	2.80863	4	5	5
Pcyt2	Ethanolamine-phosphate cytidylyltransferase	8.19661	7.37253	8.09636	7.93741	8.20705	8.35018	8.10435	8.39499	8.32519	8.31513	7.99275	8.50826	7.98537	8.15001	8.47392	7.96199	8.29797	8.22206	0.335975	0.260069	-0.0759068	0.0733361	0.213447	0.558856	1.13468	0.670711	0.2527	5	5	5
Sec14l4	SEC14-like protein 4			5.47971		5.7141	4.81744			4.06192	4.94222	4.65919	5.02238	3.82322		6.02568	5.5969	4.60719	4.88262	-0.989708	-0.714286	0.275422	0.0733543	0.357923	0.658602	1.13457	0.446211	0.181377	2	3	4
Tmem43	Transmembrane protein 43	9.59827	9.78407	9.69025	9.51501	9.84107	9.71018	10.377	9.93517	9.88481	9.83886	9.56598	9.71565	9.88315	10.2884	10.7348	9.68573	9.9492	10.0376	0.263463	0.351873	0.0884096	0.0733987	0.148686	0.722565	1.13431	0.827731	0.141123	5	5	5
Actn1	Alpha-actinin-1	8.37574	9.30948	8.33377	7.83129	8.55354	8.16396	7.98601	7.71905	7.98472	7.98009	7.94505	8.75216	8.31435	7.88756	7.94038	8.48076	7.96677	8.1679	-0.513998	-0.312863	0.201135	0.0735943	0.313096	0.294836	1.13316	0.504322	0.530419	5	5	5
Fam234a	Protein FAM234A	8.51869	10.3693	8.59688	8.7181	8.78512	8.54526	8.13367	8.34374	8.18772	8.12474	8.11794	8.27244	8.1912	8.2374	8.07238	8.99762	8.26703	8.17827	-0.730591	-0.819346	-0.0887551	0.0736758	0.046361	0.342879	1.13267	1.33385	0.464859	5	5	5
Nlrx1	NLR family member X1			6.47432		6.37593			6.97749		6.7463			7.13003	6.64134		6.42513	6.86189	6.88568	0.436765	0.460554	0.0237897	0.0737032	0.205894	0.937888	1.13251	0.686356	0.0278489	2	2	2
Pip5k1a	Phosphatidylinositol 4-phosphate 5-kinase type-1 alpha	7.12493	7.78373	6.92204	6.77655	7.06075	6.56953	7.14907	6.4619	6.81553	6.40049	6.38163	7.1348	6.74879	6.73126	7.01347	7.1336	6.6793	6.80199	-0.454298	-0.331612	0.122687	0.0738301	0.164705	0.534968	1.13177	0.783292	0.271672	5	5	5
Ndufs7	NADH dehydrogenase [ubiquinone] iron-sulfur protein 7, mitochondrial	10.5458	10.4039	10.102	9.51037	10.3943	10.5058	11.107	10.9597	10.3267	10.5008	9.84391	10.2218	9.8688	10.0854	9.87801	10.1913	10.68	9.97958	0.48873	-0.211699	-0.700429	0.0739715	0.319194	0.00303524	1.13094	0.495945	2.51781	5	5	5
Tmem130	Transmembrane protein 130	6.47765		5.91234	6.16963	5.63441	5.57478	5.25331	5.01327	5.96813	5.78584	6.181	6.46264	6.3276	6.79409	7.41879	6.04851	5.51906	6.63682	-0.529445	0.588314	1.11776	0.0741594	0.0868198	0.00402495	1.12983	1.06138	2.39524	4	5	5
Nsg1	Neuronal vesicle trafficking-associated protein 1	7.18966	7.88317	7.06275	7.21265		6.84323		6.38712		6.98567	7.18102	6.69592	6.96624	6.91898	7.08357	7.33706	6.73867	6.96915	-0.598383	-0.367911	0.230472	0.074271	0.0902799	0.227455	1.12918	1.04441	0.643105	4	3	5
Golm2	Protein GOLM2	9.25798	9.3386	8.95622	8.81939	8.99737	8.51354	8.5295	8.56993	9.23279	8.80824	8.961	8.70627	9.19969	8.98976	9.44225	9.07391	8.7308	9.05979	-0.343113	-0.0141191	0.328993	0.0744557	0.930619	0.111568	1.1281	0.0312282	0.952459	5	5	5
Kcnj4	Inward rectifier potassium channel 4	7.65971	9.01555	7.33235	7.65505	7.69196	7.32671	7.29823	7.37418	7.37209	6.6773	7.46981	7.6134	7.80333	8.02413	8.13074	7.87092	7.2097	7.80828	-0.661219	-0.0626439	0.598576	0.0745733	0.848897	0.0110022	1.12742	0.0711449	1.95852	5	5	5
Sptlc2	Serine palmitoyltransferase 2	6.43388		6.25404	6.19447	6.31571	6.45323	6.53648	6.9114	6.43626	6.38182	6.5625	6.66122	6.59986	7.44911	7.61588	6.29953	6.54384	6.97772	0.24431	0.678189	0.433879	0.0749965	0.0365607	0.117799	1.12496	1.43699	0.928859	4	5	5
Pradc1	Protease-associated domain-containing protein 1			5.68787	5.7209	5.32801		5.55826	6.53842	6.81523	6.43624	6.12414	6.79224	6.80479	7.23584	7.40121	5.57893	6.33704	6.87165	0.758114	1.29272	0.534607	0.0750796	0.00583364	0.166822	1.12448	2.23406	0.777747	3	4	5
Ndufab1	Acyl carrier protein, mitochondrial	7.27358		6.24374	5.47055	6.67996	7.21801	7.41701	6.64081	7.38647	7.28153	6.97864	7.22903	7.12535	6.98647	7.7665	6.41696	7.18876	7.2172	0.771806	0.800238	0.0284319	0.0754194	0.0683168	0.891892	1.12252	1.16547	0.0496878	4	5	5
C2cd4c	C2 calcium-dependent domain-containing protein 4C	8.86153	10.4746	8.84159	8.98637	8.814	8.62375	8.36249	8.44854	8.39906	8.77292	9.44859	9.16629	9.15503	8.73027	8.7486	9.19562	8.52135	9.04976	-0.674266	-0.145859	0.528407	0.0754824	0.687146	0.00998788	1.12215	0.162951	2.00053	5	5	5
Psip1	PC4 and SFRS1-interacting protein	7.30465		7.084	6.44854	6.53686	6.83856	7.35847	7.33029	7.58828	7.64437	7.33583	7.21663	7.00308	6.91715	7.33848	6.84351	7.35199	7.16223	0.508482	0.318723	-0.189759	0.075624	0.168498	0.287606	1.12134	0.773405	0.541201	4	5	5
Fth1	Ferritin heavy chain	9.76964	8.52663	9.76145	10.6161	9.5001	10.2586	10.364	10.2935	10.52	10.1969	10.4754	10.4585	10.1954	10.6516	11.5165	9.63479	10.3266	10.6595	0.691827	1.02469	0.332861	0.0759114	0.0349774	0.190933	1.11969	1.45621	0.719119	5	5	5
Bcam	Basal cell adhesion molecule	9.43024	9.91163	9.26394	9.31389	9.20969	9.29969	9.18535	8.99899	9.08812	9.16793	9.06306	8.92564	8.93695	8.89366	8.97403	9.42588	9.14801	8.95867	-0.277864	-0.467211	-0.189347	0.0760013	0.00706579	0.0115442	1.11918	2.15084	1.93764	5	5	5
Ust	Uronyl 2-sulfotransferase	7.70997		7.57735	7.29967	7.34197	7.28438	7.26067	6.75235	7.42184	7.05553	6.92406	7.4751	7.11799	7.43602	8.3367	7.48224	7.15495	7.45797	-0.327286	-0.0242641	0.303022	0.076058	0.935148	0.29223	1.11885	0.0291198	0.534276	4	5	5
Rfc3	Replication factor C subunit 3	5.75333	7.03609	5.61986	5.50588	5.62088	5.53564	5.06116	4.74567	5.59473	5.28768	5.73229	6.17428	5.79703	5.90116	6.31103	5.90721	5.24498	5.98316	-0.662234	0.0759499	0.738184	0.0761156	0.810194	0.00496486	1.11853	0.091411	2.30409	5	5	5
Snx30	Sorting nexin-30	11.5322	13.3796	11.855	11.6822	13.185	11.6895	12.2544	11.5168	9.27279	9.67784	10.7147	8.584	9.98042			12.3268	10.8823	9.75971	-1.44455	-2.5671	-1.12255	0.0764392	0.0102609	0.263604	1.11668	1.98881	0.579049	5	5	3
Scai	Protein SCAI	8.59162	9.35447	8.25455	8.02199	8.55665	8.12553	8.22374	7.86674	8.09306	8.10461	8.19542	8.43697	8.30505	8.14905	8.10142	8.55585	8.08274	8.23758	-0.473115	-0.318274	0.154842	0.0765735	0.209398	0.102818	1.11592	0.679028	0.987929	5	5	5
Ndfip1	NEDD4 family-interacting protein 1	8.82993	10.2725	8.60101	8.65028	9.35015	8.46507	9.10066	8.33509	8.13682	7.85106	8.03485	8.47365	8.22383	8.84623	9.12264	9.14077	8.37774	8.54024	-0.763031	-0.600531	0.1625	0.0766422	0.14374	0.588214	1.11553	0.842422	0.230465	5	5	5
Ttyh1	Protein tweety homolog 1	9.81949	9.57451	9.86491	10.1728	10.0868	9.95569	10.1311	10.2228	10.8686	10.2417	10.3142	10.0395	10.3093	10.5731	10.8398	9.9037	10.284	10.4152	0.380283	0.511475	0.131192	0.0767577	0.0177034	0.541423	1.11488	1.75194	0.266463	5	5	5
Trappc4	Trafficking protein particle complex subunit 4	8.98464	9.32562	8.61944	8.50563	9.00643	8.96512	8.72269	8.29018	8.00598	7.9084	8.44821	8.37372	8.34376	7.98528	8.15313	8.88835	8.37847	8.26082	-0.509878	-0.627531	-0.117654	0.077013	0.00604716	0.608139	1.11344	2.21845	0.215997	5	5	5
Wdr5	WD repeat-containing protein 5	3.27859		3.17235	3.63035		1.93208		2.52277	2.69114	3.25486	3.41587	4.14401	3.47139	3.94155	3.88967	3.36043	2.60021	3.7725	-0.760219	0.412066	1.17229	0.0770229	0.101917	0.00471975	1.11338	0.991755	2.32608	3	4	5
Syt2	Synaptotagmin-2	10.0496	10.5277	10.3335	9.89811	10.0962	10.3576	10.7118	10.2534	10.5091	10.4472	9.92837	10.0027	10.0576	10.3416	10.2359	10.181	10.4558	10.1132	0.274795	-0.0678117	-0.342606	0.0770241	0.629026	0.0134783	1.11337	0.201332	1.87036	5	5	5
Podxl	Podocalyxin	8.36672	8.78991	8.36925	8.23294	8.23973	8.4829	7.50371	8.14569	7.70836	8.12025	8.34661	8.05745	8.00131	7.45381	7.22282	8.39971	7.99218	7.8164	-0.407528	-0.583312	-0.175783	0.0770933	0.0353714	0.53315	1.11298	1.45135	0.273151	5	5	5
Abca2	ATP-binding cassette sub-family A member 2	10.0454	10.4204	9.6671	9.80254	9.76409	9.62441	9.79162	9.58884	9.64687	9.63066	9.81586	9.74466	9.80967	9.95796	10.2527	9.93991	9.65648	9.91617	-0.283428	-0.0237409	0.259687	0.0771627	0.88787	0.0287469	1.11259	0.0516507	1.54141	5	5	5
Cd200	OX-2 membrane glycoprotein	10.9659	11.3889	10.753	10.8073	10.9578	11.368	11.2338	11.0693	11.1513	11.3017	11.1032	10.8688	10.8719	11.3798	11.2053	10.9746	11.2248	11.0858	0.250228	0.111214	-0.139014	0.0773868	0.476291	0.248885	1.11133	0.322128	0.604001	5	5	5
Abhd17c	Alpha/beta hydrolase domain-containing protein 17C	8.47774		8.22434	8.61124	9.1403	8.33627	8.40936	8.31887	7.61103	7.81411	8.03202	7.27932	7.42066	7.51364	6.9082	8.61341	8.09793	7.43077	-0.515481	-1.18264	-0.667158	0.077582	0.00306834	0.0254037	1.11024	2.5131	1.5951	4	5	5
Adam11	Disintegrin and metalloproteinase domain-containing protein 11	8.69341	8.98772	8.72056	8.9394	8.75122	8.37825	8.80206	8.68217	8.72857	8.50729	8.743	8.41299	8.71258	8.54521	8.43965	8.81846	8.61967	8.57069	-0.198793	-0.247777	-0.0489833	0.0775915	0.026105	0.647309	1.11019	1.58328	0.188888	5	5	5
Myh14	Myosin-14	8.95849	9.88813	9.35044	9.05917	8.95316	8.9854	8.822	8.52215	9.05522	8.80595	9.63531	9.22715	9.20828	9.56106	9.97638	9.24188	8.83815	9.52163	-0.403735	0.279755	0.683489	0.0776725	0.253226	0.00380396	1.10973	0.596491	2.41976	5	5	5
Ppp2r2c	Serine/threonine-protein phosphatase 2A 55 kDa regulatory subunit B gamma isoform	6.19773		5.79069	6.32397	5.86677		6.5243	6.01417	7.59399	7.28545	6.49956	8.16299	7.67182	7.25522	8.45896	6.04479	6.85448	7.60971	0.809686	1.56492	0.755235	0.0779505	0.00639533	0.176995	1.10818	2.19414	0.75204	4	4	5
Slc22a21;Slc22a5	Solute carrier family 22 member 21;Organic cation/carnitine transporter 2	8.21748	8.67402	7.93385	7.90847	7.43278	7.94037	7.04634	6.84871	7.83516	7.51108	7.59064	7.62315	7.658	7.93063	7.89452	8.03332	7.43633	7.73939	-0.596985	-0.293927	0.303058	0.0780451	0.210751	0.216246	1.10765	0.67623	0.665052	5	5	5
Niban2	Protein Niban 2	6.82637		7.36968	7.42507	7.60223	6.72975	7.44865	6.51718	6.77613	6.60944	6.9885	7.60946	6.79964	6.84609	7.14881	7.30584	6.81623	7.0785	-0.489605	-0.227337	0.262268	0.0781711	0.338756	0.267367	1.10695	0.470113	0.572893	4	5	5
Ddah1	N(G),N(G)-dimethylarginine dimethylaminohydrolase 1	6.96875	7.83282	7.34142	7.93388	7.61297	8.22446	8.35717	7.81828	8.06012	7.53472	7.30151	7.26833	7.13343	7.54087	7.88034	7.53797	7.99895	7.4249	0.460982	-0.113071	-0.574052	0.0782257	0.6193	0.0194957	1.10665	0.208099	1.71006	5	5	5
Hacd3	Very-long-chain (3R)-3-hydroxyacyl-CoA dehydratase 3	9.32426	9.33508	9.21174	8.97326	8.99018	9.19123	9.69521	9.42928	9.41367	9.27822	8.99944	9.36883	9.36362	10.2106	10.2609	9.16691	9.40152	9.64066	0.234615	0.473757	0.239141	0.0783228	0.110592	0.395325	1.10611	0.956276	0.403046	5	5	5
Actr1a	Alpha-centractin	7.03735	7.78466	7.37198	7.43831	7.34197	7.56648	7.96271	7.6317	7.66324	7.56363	7.34107	7.65686	7.73281	7.11705	7.34595	7.39485	7.67755	7.43875	0.282697	0.0438964	-0.238801	0.0787394	0.796234	0.114931	1.10381	0.0989594	0.939564	5	5	5
Kcnc3	Potassium voltage-gated channel subfamily C member 3	9.9235	10.4854	9.49943	9.33497	10.1045	9.69672	9.84315	9.20337	8.77726	8.57502	8.68769	8.39221	8.7638	8.70808	8.67878	9.86957	9.2191	8.64611	-0.650465	-1.22346	-0.572991	0.0788984	0.000493913	0.0557337	1.10293	3.30635	1.25388	5	5	5
Tenm1	Teneurin-1	6.8244		7.11988	7.48222	7.14426	7.47712	7.28	7.38265	7.58795	7.35035	7.46537	7.33446	7.61967	7.54936	7.82624	7.14269	7.41562	7.55902	0.272928	0.416331	0.143403	0.0789234	0.0277078	0.181048	1.10279	1.5574	0.742207	4	5	5
Inpp5j	Phosphatidylinositol 4,5-bisphosphate 5-phosphatase A	8.13361	8.45179	8.32151	8.11857	7.80905	7.98711	8.06614	7.85928	7.95046	7.74417	7.95519	8.61865	8.16173	8.04297	8.49786	8.16691	7.92143	8.25528	-0.245475	0.0883718	0.333846	0.0791333	0.615241	0.0450995	1.10164	0.210955	1.34583	5	5	5
Ociad1	OCIA domain-containing protein 1	8.11518	8.78285	8.04593	7.65835	8.06092	8.25463	8.4891	8.85983	8.47567	8.68035	8.14485	8.42685	8.37765	7.80644	7.2754	8.13265	8.55192	8.00624	0.419269	-0.12641	-0.545679	0.0792684	0.663724	0.0498105	1.1009	0.178013	1.30268	5	5	5
Mpc1	Mitochondrial pyruvate carrier 1	10.5835	12.2423	10.2734	9.77087	11.1832	9.90798	10.4198	10.3283	9.24044	9.0676	9.06055	9.37219	9.15167	9.12632	8.68622	10.8106	9.79281	9.07939	-1.01782	-1.73124	-0.713425	0.0794097	0.00428456	0.0434028	1.10013	2.36809	1.36248	5	5	5
Hpcal4	Hippocalcin-like protein 4	11.736	12.9554	11.775	11.8798	11.7714	11.709	11.5398	11.2646	11.4852	11.6455	11.9931	12.2432	12.0925	12.0943	11.9723	12.0235	11.5288	12.0791	-0.494697	0.0555414	0.550238	0.0796372	0.822131	0.000297362	1.09888	0.0850591	3.52671	5	5	5
Wrn	Bifunctional 3'-5' exonuclease/ATP-dependent helicase WRN	10.8491	13.4477	11.3674	11.4418	12.5308	11.7456	11.1024	11.1452	9.53009	9.66758	10.6397	8.87307	9.6521	10.1282	9.43933	11.9274	10.6382	9.74648	-1.28917	-2.18087	-0.8917	0.079714	0.00443168	0.132775	1.09847	2.35343	0.876882	5	5	5
Rpl32	Large ribosomal subunit protein eL32	9.09725	7.67775	9.12651	8.819	8.99055	9.05251	9.29791	9.43908	9.40388	9.32498	9.20557	9.42121	9.27019	9.07448	9.14129	8.74221	9.30367	9.22255	0.561458	0.480338	-0.0811202	0.0797361	0.122205	0.394429	1.09835	0.912912	0.404031	5	5	5
Cep152	Centrosomal protein of 152 kDa	12.6668	14.2701	12.0787	12.1222	13.5327	11.7836	13.4285	11.412	10.6312	10.8956	11.3996	10.0271	11.3251	11.0803	10.0378	12.9341	11.6302	10.774	-1.30391	-2.16009	-0.85618	0.0797437	0.00333828	0.17824	1.0983	2.47648	0.748994	5	5	5
Hs6st1	Heparan-sulfate 6-O-sulfotransferase 1	6.93696		6.75009	6.7275	6.46121	6.68059	7.29313	7.00412	7.11751	6.96239	6.72103	7.09934	7.04107	7.42146	7.44893	6.71894	7.01155	7.14637	0.292609	0.427426	0.134817	0.0797588	0.0446079	0.445255	1.09822	1.35059	0.351391	4	5	5
Nrgn	Neurogranin	7.75618	7.90924	8.00474	9.00246	7.61682	8.35476	9.22935	8.2145	8.77105	8.76315	7.92275	8.27106	8.03508	8.04429	8.04499	8.05789	8.66656	8.06363	0.608676	0.0057474	-0.602929	0.0797645	0.982342	0.0123134	1.09819	0.00773724	1.90962	5	5	5
Kif3a	Kinesin-like protein KIF3A	7.82154	8.50398	7.60527	7.44064	7.58936	7.40604	7.82153	6.85627	7.32243	7.04792	7.28822	7.43602	7.20077	7.07958	6.97959	7.79216	7.29084	7.19683	-0.501316	-0.595321	-0.0940049	0.0799556	0.0194153	0.621483	1.09715	1.71186	0.206571	5	5	5
Psme1	Proteasome activator complex subunit 1			5.70602	5.58435	5.52969		6.82044	5.94342	6.14941	5.83418	5.26439	6.40014	5.48865	5.33279	6.26589	5.60669	6.18686	5.75037	0.580175	0.143685	-0.43649	0.0803172	0.673267	0.234746	1.09519	0.171812	0.629401	3	4	5
Pak2	Serine/threonine-protein kinase PAK 2	7.84934	7.84267	7.32145	6.97787	7.19541	7.48204	7.16252	6.52074	6.80133	6.79327	7.18552	7.03195	6.56851	6.65945	6.78185	7.43735	6.95198	6.84546	-0.485369	-0.591893	-0.106523	0.080339	0.0225928	0.61414	1.09507	1.64603	0.211733	5	5	5
Il6st	Interleukin-6 receptor subunit beta	6.81265	7.14036	6.66926	6.47299	6.70249	7.21993	7.11702	6.99997	6.88649	6.86523	6.82498	6.91224	6.94758	7.04016	7.14837	6.75955	7.01773	6.97467	0.258177	0.215117	-0.0430607	0.0803738	0.118572	0.635761	1.09489	0.926017	0.196706	5	5	5
Rab4a	Ras-related protein Rab-4A	6.68817		6.6478	6.38338	6.52979	6.37445	6.44368	6.46996	6.42215	6.45736	6.33401	6.74469	6.66508	6.37943	6.96629	6.56229	6.43352	6.6179	-0.128767	0.0556124	0.18438	0.0804436	0.715288	0.159573	1.09451	0.145519	0.79704	4	5	5
Tpbg	Trophoblast glycoprotein	8.32154	9.32044	8.20043	8.40375	8.38593	7.8803	8.0267	8.14856	8.32595	8.10523	8.11293	7.80605	8.03764	8.16806	8.36527	8.52642	8.09735	8.09799	-0.429072	-0.428431	0.000640723	0.0805207	0.0888252	0.995755	1.09409	1.05146	0.00184765	5	5	5
Prpf6	Pre-mRNA-processing factor 6	8.28097	10.3526	8.24938	8.09787	8.45974	7.62877	7.25209	7.87128	8.22529	7.95607	8.33239	8.82323	8.82834	8.63659	8.66393	8.68811	7.7867	8.6569	-0.901404	-0.0312084	0.870196	0.0806843	0.943878	0.00165432	1.09321	0.025084	2.78138	5	5	5
Vdac3	Voltage-dependent anion-selective channel protein 3	10.1339	10.6158	9.64788	9.17435	9.83477	10.0513	10.782	10.7613	10.1682	10.4657	9.851	10.3087	9.90521	10.2618	10.4896	9.88133	10.4457	10.1633	0.564353	0.281941	-0.282413	0.0815215	0.327391	0.182099	1.08873	0.484933	0.739692	5	5	5
Pex5l	PEX5-related protein	8.33343	7.97894	7.94354	8.08008	8.14411	7.83813	8.24822	7.5591	7.84295	7.45189	7.91654	8.12321	7.71244	8.14462	8.46193	8.09602	7.78806	8.07175	-0.307964	-0.0242743	0.283689	0.0816685	0.869467	0.166842	1.08795	0.0607467	0.777694	5	5	5
Necab2	N-terminal EF-hand calcium-binding protein 2			5.84888	6.48709	6.96029	6.89387	7.94119	6.80319	7.45957	6.94534	6.8239	7.16216	6.61168	6.88922		6.43209	7.20863	6.87174	0.776547	0.439658	-0.336889	0.0817081	0.203978	0.243177	1.08773	0.690417	0.614078	3	5	4
Hmga1	High mobility group protein HMG-I/HMG-Y	4.23177		3.29733	2.1099	4.37892	3.97904	5.53875	5.26524	9.66516	5.19032	4.41252	5.05377	4.14412	4.28754	4.18703	3.50448	5.9277	4.41699	2.42322	0.912514	-1.51071	0.0819985	0.108541	0.164073	1.08619	0.964408	0.784964	4	5	5
Prkcg	Protein kinase C gamma type	12.2153	12.2039	12.4051	12.3823	12.3521	11.828	12.0787	11.9574	12.1841	12.4209	12.6118	12.8204	12.7191	12.8942	13.1826	12.3118	12.0938	12.8456	-0.21795	0.53385	0.7518	0.0822694	0.000988834	0.000668671	1.08476	3.00488	3.17479	5	5	5
Unc80	Protein unc-80 homolog	6.84845	7.94601	6.37778	6.73871	7.05563	6.43557	6.54575	6.5551	6.50235	6.27736	6.63569	6.72676	6.95424	6.86095	7.42509	6.99332	6.46323	6.92055	-0.530091	-0.0727693	0.457322	0.0825867	0.81209	0.0142554	1.08309	0.0903956	1.84602	5	5	5
Pacsin1	Protein kinase C and casein kinase substrate in neurons protein 1	9.75696	10.4327	9.88045	9.95024	9.94374	10.086	10.4152	10.1154	10.3194	10.3423	9.54597	9.60039	9.45	9.57721	9.88649	9.99281	10.2557	9.61201	0.262857	-0.380801	-0.643658	0.0826654	0.0236492	0.000177288	1.08268	1.62618	3.75132	5	5	5
Galnt17	Polypeptide N-acetylgalactosaminyltransferase 17	9.6865	10.3159	9.2704	9.2229	9.63154	9.22146	9.36921	9.21165	9.28277	9.01496	8.91695	8.87058	8.94135	9.08943	9.47059	9.62545	9.22001	9.05778	-0.405439	-0.567668	-0.162229	0.0827925	0.0353626	0.227553	1.08201	1.45146	0.642917	5	5	5
Slc39a14	Metal cation symporter ZIP14			6.21879	5.99144	5.78678		6.20701	6.53194	7.23459	6.45229	5.55304	6.86316	6.60947	7.11269	7.54205	5.99901	6.60646	6.73608	0.607452	0.737074	0.129622	0.0830075	0.155439	0.769116	1.08088	0.80844	0.114008	3	4	5
Aqp4	Aquaporin-4	11.2042	12.6309	10.9489	10.987	11.4824	11.166	11.1808	10.7641	10.2743	10.052	10.512	9.77439	10.1679	9.76867	9.5537	11.4507	10.6874	9.95534	-0.763251	-1.49535	-0.732097	0.0831439	0.00289615	0.0336916	1.08017	2.53818	1.47248	5	5	5
Atp11c	Phospholipid-transporting ATPase 11C	8.72563	9.46733	8.3041	8.33331	8.54945	8.4295	8.27317	8.08586	8.2118	8.20912	7.79463	7.90927	7.73761	8.25614	7.95562	8.67597	8.24189	7.93065	-0.434076	-0.745313	-0.311237	0.0832727	0.0120114	0.0189269	1.0795	1.9204	1.72292	5	5	5
Pdha1	Pyruvate dehydrogenase E1 component subunit alpha, somatic form, mitochondrial	8.489	9.54002	8.15922	8.05742	8.77347	8.91229	9.59846	9.49461	8.9433	9.05791	8.5046	8.74161	8.5529	8.22557	8.42571	8.60383	9.20131	8.49008	0.597488	-0.11375	-0.711238	0.0835984	0.694124	0.0027392	1.0778	0.158563	2.56238	5	5	5
Vsir	V-type immunoglobulin domain-containing suppressor of T-cell activation	8.09488		8.00485	7.8454	8.118	8.28176	9.03661	8.58363	8.31799	7.97036	7.5665	7.92918	7.82491	8.04535		8.01578	8.43807	7.84148	0.422287	-0.174299	-0.596586	0.08369	0.194547	0.0308541	1.07733	0.710974	1.51069	4	5	4
Clu	Clusterin	8.80523	9.35575	8.64358	8.7793	8.60201	9.12829	8.9316	9.24596	9.40404	9.03722	9.03335	8.72806	8.87061	9.13739	9.30542	8.83717	9.14942	9.01497	0.312249	0.177794	-0.134455	0.0838953	0.322603	0.330909	1.07626	0.491331	0.480291	5	5	5
Src	Proto-oncogene tyrosine-protein kinase Src	8.46727	7.98234	7.8853	8.15645	8.06865	8.54262	8.53881	8.12601	8.39884	8.23161	8.09226	8.22686	7.93523	7.94986	8.3843	8.112	8.36758	8.1177	0.255578	0.0056998	-0.249879	0.0841263	0.966369	0.0688253	1.07507	0.0148569	1.16225	5	5	5
Gmpr2	GMP reductase 2	6.2091		5.20556	5.72091	5.24628	5.5711	6.17792	6.06513	6.68144	6.49336	5.98222	6.50378	6.15711	6.55838	7.47868	5.59546	6.19779	6.53603	0.602328	0.940571	0.338243	0.084488	0.0344708	0.324072	1.0732	1.46255	0.489359	4	5	5
Mx2	Interferon-induced GTP-binding protein Mx2	5.65514			5.01005	4.79085	6.79812		5.90463				5.16197				5.15201	6.35138	5.16197	1.19936	0.00996042	-1.1894	0.0847044	#DIV/0!	#DIV/0!	1.07209	#DIV/0!	#DIV/0!	3	2	1
Jagn1	Protein jagunal homolog 1	8.11949	8.39381	8.14689	8.05218	7.68019	8.15547	8.46274	8.21975	8.54537	8.34831	8.10478	8.40848	8.47722	9.32234	9.52807	8.07851	8.34633	8.76818	0.267816	0.689666	0.42185	0.0847306	0.0507498	0.179435	1.07196	1.29457	0.746092	5	5	5
Alg9	Alpha-1,2-mannosyltransferase ALG9	6.83772	7.22802	7.16602	7.0553	6.94662	6.89822	8.00915	7.33866	7.61575	7.30927	7.84065	7.77813	7.72657	7.82047	9.15037	7.04674	7.43421	8.06324	0.387476	1.0165	0.629025	0.0847893	0.00688293	0.0919855	1.07166	2.16223	1.03628	5	5	5
Maoa	Amine oxidase [flavin-containing] A	9.90103	10.6669	9.70084	9.28921	9.68423	10.1231	10.5626	10.5505	10.1769	10.2454	9.72539	9.97487	9.67991	9.88457	9.98112	9.84845	10.3317	9.84917	0.483241	0.000722363	-0.482519	0.0850788	0.997631	0.00269886	1.07018	0.0010299	2.56882	5	5	5
Tubb2a	Tubulin beta-2A chain	14.5575	13.6843	14.6773	14.3324	14.2523	14.6719	14.3275	14.6031	15.0391	14.9792	14.8899	15.1666	14.6589	14.6109	14.929	14.3007	14.7242	14.8511	0.423433	0.550321	0.126888	0.0851747	0.0245238	0.462487	1.06969	1.61041	0.3349	5	5	5
Anapc4	Anaphase-promoting complex subunit 4	7.38572		7.01068	7.57185	7.45275	7.98869		7.3379	7.75483	7.87716	7.98951	8.64519	8.10101	7.97738	8.04926	7.35525	7.73965	8.15247	0.384396	0.797221	0.412826	0.0852903	0.00281586	0.0652634	1.0691	2.55039	1.18533	4	4	5
Pcdha4;Pcdha8;Pcdha7;Pcdha6;Pcdha5;Pcdha3;Pcdha2;Pcdha12;Pcdha11;Pcdha1	Protocadherin alpha-4;Protocadherin alpha 8;Protocadherin alpha-7;Pcdha6 protein;Protocadherin alpha 5;Protocadherin alpha 3;Protocadherin alpha 2;Protocadherin alpha 12;Protocadherin alpha 11;Protocadherin alpha 1	8.79736	9.67024	8.56955	8.9197	8.59683	8.64257	8.13065	8.46326	8.6209	8.5288	8.62591	8.79105	8.66506	9.1049	9.33044	8.91074	8.47724	8.90347	-0.433501	-0.00726494	0.426236	0.0853019	0.976814	0.0319554	1.06904	0.010188	1.49546	5	5	5
Vdac1	Voltage-dependent anion-selective channel protein 1	13.3567	13.6032	12.8186	12.2898	13.0459	13.1937	13.7796	13.991	13.263	13.5596	12.9832	13.3068	13.0683	13.1668	12.9613	13.0228	13.5574	13.0973	0.534523	0.0744411	-0.460082	0.085368	0.759996	0.0229515	1.0687	0.119189	1.63919	5	5	5
Fhl1	Four and a half LIM domains protein 1	8.4798	10.3149	8.43577	8.37144	8.0395	7.87992	7.80397	7.87907	8.11808	7.96179	8.12288	8.41249	8.0844	8.21911	8.30055	8.72828	7.92857	8.22789	-0.799709	-0.500388	0.299321	0.0854296	0.255433	0.00574199	1.06839	0.592724	2.24094	5	5	5
Chek1	Serine/threonine-protein kinase Chk1	8.19271		8.63632	8.52472	8.397	8.47421	7.50407	7.70355	8.15681	8.18683	8.42664	8.69691	8.30504	8.25954	8.14956	8.43769	8.00509	8.36754	-0.432592	-0.070147	0.362445	0.0854484	0.619517	0.106242	1.0683	0.207947	0.973703	4	5	5
Rap1gap2	Rap1 GTPase-activating protein 2	9.39638	10.3217	9.40675	9.08457	9.40005	9.37852	9.04128	8.81046	8.88959	9.20287	9.13647	9.16019	9.11881	8.15755	8.06465	9.52189	9.06454	8.72754	-0.457349	-0.794357	-0.337008	0.0855718	0.0415466	0.251277	1.06767	1.38146	0.599847	5	5	5
Ehd1	EH domain-containing protein 1	9.58144	10.6312	9.37178	9.15842	9.57927	9.27464	9.38632	8.87053	9.08182	9.07745	9.17124	9.48538	9.15771	8.89389	9.33623	9.66443	9.13815	9.20889	-0.526278	-0.45554	0.0707381	0.0863131	0.133275	0.609686	1.06392	0.875251	0.214894	5	5	5
Tmem259	Membralin	7.9631		7.76417	7.68282	7.71283	7.78799	8.20907	7.98447	8.04875	7.86674	7.94353	8.01969	8.47886	8.76647	8.96697	7.78073	7.97941	8.43511	0.198676	0.654376	0.4557	0.0865565	0.0269605	0.0658274	1.0627	1.56927	1.18159	4	5	5
Ubr3	E3 ubiquitin-protein ligase UBR3	3.45209	4.36651	3.85716	4.18891	4.22526	3.6385				3.05593	3.39566	3.84758	3.52908	3.87255	4.53603	4.01798	3.34722	3.83618	-0.670767	-0.181805	0.488961	0.086582	0.49914	0.237539	1.06257	0.301778	0.624265	5	2	5
Ache	Acetylcholinesterase	8.23443	9.31669	7.88158	7.93307	8.38535	9.10031	8.97503	9.16519	8.83406	8.47408	8.06083	7.89485	7.96535	8.25868	8.29602	8.35022	8.90973	8.09514	0.559511	-0.255078	-0.814589	0.0867655	0.373936	0.000523782	1.06165	0.427202	3.28085	5	5	5
Rab12	Ras-related protein Rab-12	8.56866	9.75281	8.22539	7.97636	8.43682	8.26942	8.08088	7.9396	7.69941	7.8237	8.13541	8.01894	7.84019	7.35961	7.50402	8.59201	7.9626	7.77163	-0.629406	-0.820375	-0.190969	0.086936	0.0427702	0.315737	1.0608	1.36886	0.500674	5	5	5
Stx4	Syntaxin-4	6.98479		6.93418	7.14705	7.05537	7.35195	7.64277	6.97107	7.73042	7.13605	7.17846	7.02113	7.083	7.26767	7.29076	7.03035	7.36645	7.16821	0.336103	0.137857	-0.198246	0.086971	0.0951198	0.233092	1.06063	1.02173	0.632472	4	5	5
Abcd2	ATP-binding cassette sub-family D member 2			7.1364	6.51438	6.60843		7.38993	7.10393	7.20199	6.96166	7.09007	7.25585	7.25738	7.72616	8.01989	6.75307	7.16438	7.46987	0.411308	0.716801	0.305494	0.0872282	0.0384489	0.193145	1.05934	1.41512	0.714116	3	4	5
Tmem106b	Transmembrane protein 106B	8.94835	10.0018	8.18462	8.62855	8.76298	8.48229	8.6135	8.07072	8.19811	8.02011	8.26724	8.17229	8.17231	8.30259	8.94995	8.90526	8.27695	8.37288	-0.628313	-0.532383	0.09593	0.0878827	0.151112	0.621898	1.0561	0.820702	0.206281	5	5	5
Gna11	Guanine nucleotide-binding protein subunit alpha-11	10.4165	11.172	10.2645	10.324	10.3784	10.7973	11.058	10.8816	10.9207	10.6495	10.6324	10.6182	10.5984	10.8349	11.1939	10.5111	10.8614	10.7756	0.350368	0.264497	-0.0858712	0.0880187	0.226306	0.532628	1.05543	0.645304	0.273576	5	5	5
Usp12	Ubiquitin carboxyl-terminal hydrolase 12	6.72314	8.16127	6.41302	6.31608	6.56895	6.42354	6.21081	5.99197	6.17432	6.0083	6.70705	6.6257	6.82025	6.42062	6.81429	6.83649	6.16179	6.67758	-0.674701	-0.15891	0.515791	0.0880194	0.658516	0.00137672	1.05542	0.181433	2.86116	5	5	5
Elmo2	Engulfment and cell motility protein 2	8.11353	9.70087	8.10083	8.05191	8.43276	7.82614	8.15925	7.90451	7.50943	7.80099	7.9187	7.96025	7.78413	7.32598	7.7063	8.47998	7.84007	7.73907	-0.639914	-0.740909	-0.100995	0.0880492	0.0563537	0.52937	1.05527	1.24908	0.276241	5	5	5
Os9	Protein OS-9	8.68772		7.63356	7.6152	8.42244	8.96783	9.88533	9.5601	8.36895	8.12787	7.97385	7.16958	7.82838	6.90701		8.08973	8.98202	7.46971	0.892288	-0.620023	-1.51231	0.0881091	0.149695	0.011166	1.05498	0.824792	1.9521	4	5	4
Vps50	Syndetin	7.62087	8.22366	7.4475	7.3257	7.4214	7.39908	7.21418	7.07774	7.36446	7.32027	7.44809	7.78208	7.4941	7.24024	7.44439	7.60783	7.27515	7.48178	-0.332681	-0.126047	0.206634	0.0882101	0.510717	0.0838925	1.05448	0.29182	1.07628	5	5	5
Gsk3b	Glycogen synthase kinase-3 beta	9.21268	9.16663	8.85838	8.5308	9.06573	8.9228	8.94068	8.45899	8.4064	8.36849	8.61604	8.64894	8.55071	8.12951	8.45768	8.96685	8.61948	8.48057	-0.34737	-0.48627	-0.1389	0.0883739	0.014339	0.407399	1.05368	1.84348	0.38998	5	5	5
Prune2	Protein prune homolog 2	8.91978	11.0691	9.0182	8.66987	8.83783	8.44256	8.88203	8.31874	7.91805	8.38732	8.87864	8.4423	8.60219	7.23489	7.40453	9.30295	8.38974	8.11251	-0.91321	-1.19044	-0.277226	0.0884999	0.0644661	0.470542	1.05306	1.19067	0.327402	5	5	5
Dkc1	H/ACA ribonucleoprotein complex subunit DKC1			7.72749	7.49749	7.20185		7.94746	7.74073	9.18117	8.39311			7.54038			7.47561	8.31562	7.54038	0.840004	0.064772	-0.775232	0.0887625	#DIV/0!	#DIV/0!	1.05177	#DIV/0!	#DIV/0!	3	4	1
Eif4a3	Eukaryotic initiation factor 4A-III	9.55542	9.95784	9.30614	9.08783	9.54983	9.12016	9.49127	9.02668	9.1771	8.99432	9.04392	9.32892	9.16997	8.99375	9.29252	9.49141	9.16191	9.16582	-0.329506	-0.325595	0.00391045	0.0888356	0.0756584	0.972624	1.05141	1.12114	0.0120552	5	5	5
Wdr48	WD repeat-containing protein 48	9.59441	10.0888	9.47598	9.14988	9.49786	9.3748	9.25015	9.14703	9.23947	9.28555	9.54477	9.6003	9.51175	9.38223	9.57797	9.56139	9.2594	9.52341	-0.301988	-0.037982	0.264006	0.0890057	0.814254	0.00109832	1.05058	0.0892401	2.95927	5	5	5
Lrrc75a	Leucine-rich repeat-containing protein 75A	7.19967		7.88004	7.88982	7.74003			7.92443	8.32775	8.14456	8.33522	8.77567	8.54435	8.43507	9.11764	7.67739	8.13225	8.64159	0.454858	0.964201	0.509343	0.0890884	0.00274309	0.0473988	1.05018	2.56176	1.32423	4	3	5
Ndufb9	NADH dehydrogenase [ubiquinone] 1 beta subcomplex subunit 9	10.2584	11.2468	10.2151	9.56073	10.2244	10.638	11.0398	11.1641	10.6098	10.8685	10.3308	10.7364	10.3923	10.3471	10.6585	10.3011	10.864	10.493	0.562932	0.191912	-0.37102	0.0891576	0.516845	0.0275818	1.04984	0.28664	1.55938	5	5	5
Tpm3-rs7	Tropomyosin 3, related sequence 7	7.50029		7.97919	7.68229	7.4211	8.09432	7.67352	7.90006	8.70101	8.05154	8.47635	7.93705	8.37536	7.94663	8.01182	7.64572	8.08409	8.14944	0.438373	0.503723	0.0653502	0.0891658	0.0207853	0.75899	1.0498	1.68224	0.119764	4	5	5
Dcaf7	DDB1- and CUL4-associated factor 7	7.43624		6.98375	6.76607	6.92771	7.46529	7.30248	7.01842	7.83418	7.45231	7.41082	7.63763	7.40457	7.2251	7.85408	7.02844	7.41454	7.50644	0.386093	0.477997	0.0919035	0.0893504	0.0302088	0.60603	1.0489	1.51987	0.217506	4	5	5
Nono	Non-POU domain-containing octamer-binding protein	8.13313	8.12884	8.34709	7.86844	8.25836	7.67907	8.3683	7.37228	7.93865	7.49854	7.79995	8.58288	7.92529	7.52376	7.73333	8.14717	7.77137	7.91305	-0.375807	-0.23413	0.141677	0.0895085	0.268681	0.589651	1.04814	0.570763	0.229405	5	5	5
Rac2	Ras-related C3 botulinum toxin substrate 2	6.45277		6.16898	6.04583	5.6752	7.47365	5.79538	6.66252	7.22119	6.78119	7.06005	6.90098	6.52223	6.99164	8.02091	6.08569	6.78678	7.09916	0.701092	1.01347	0.312378	0.0895216	0.0147733	0.435298	1.04807	1.83052	0.361213	4	5	5
Anxa5	Annexin A5	13.0634	13.0724	12.9549	12.8357	12.9751	12.8912	12.8419	12.984	12.8807	12.7403	12.8127	12.9471	12.5811	13.3391	13.8142	12.9803	12.8676	13.0988	-0.112696	0.118528	0.231225	0.0896013	0.606783	0.325258	1.04769	0.216967	0.487772	5	5	5
Slc12a4	Solute carrier family 12 member 4	9.31175	9.56323	9.0347	8.92265	9.15354	9.21789	9.12876	8.77806	8.5888	8.60681	8.87203	8.62802	8.80597	9.11887	9.67866	9.19717	8.86406	9.02071	-0.333111	-0.176464	0.156647	0.0896317	0.433454	0.505416	1.04754	0.363057	0.296351	5	5	5
Gdpd1	Lysophospholipase D GDPD1	9.26897	9.60685	8.97196	8.82167	8.94362	9.47512	9.73418	9.56457	9.21217	9.2747	8.95404	9.01569	9.21156	9.69078	9.85373	9.12261	9.45215	9.34516	0.329535	0.222545	-0.10699	0.0897053	0.361732	0.61562	1.04718	0.441613	0.210687	5	5	5
Kcnq2	Potassium voltage-gated channel subfamily KQT member 2	8.41081	9.58517	8.29004	8.49129	8.42444	7.99618	8.10722	8.10347	8.23648	8.37391	8.47145	8.4934	8.67946	8.98068	8.87365	8.64035	8.16345	8.69973	-0.4769	0.0593763	0.536277	0.0897345	0.824398	0.00209986	1.04704	0.083863	2.67781	5	5	5
Rras	Ras-related protein R-Ras	7.27704	8.62038	7.21124	7.34258	7.31644	7.17389	7.16623	6.87584	6.92158	6.98351	6.92502	6.83201	6.86366	6.84287	7.01345	7.55354	7.02421	6.8954	-0.529327	-0.658133	-0.128805	0.0901514	0.040566	0.105068	1.04503	1.39184	0.97853	5	5	5
Ndufs1	NADH-ubiquinone oxidoreductase 75 kDa subunit, mitochondrial	12.2204	12.4383	11.9041	11.2898	12.1423	12.2042	12.7615	12.9123	12.1421	12.3754	11.8029	12.1495	11.9247	11.761	11.7901	11.999	12.4791	11.8856	0.480105	-0.113359	-0.593465	0.0901748	0.603058	0.00789731	1.04492	0.219641	2.10252	5	5	5
Atp6v0a1	V-type proton ATPase 116 kDa subunit a 1	13.2074	13.4861	13.6407	13.3685	13.5286	13.1341	13.221	13.0775	13.4496	13.3685	13.7036	13.7986	13.7801	14.2807	14.2493	13.4462	13.2502	13.9625	-0.196084	0.516228	0.712312	0.0902072	0.00737389	0.00107462	1.04476	2.1323	2.96874	5	5	5
Kctd4	BTB/POZ domain-containing protein KCTD4	8.84772	9.52005	8.66767	8.73662	8.83637	8.46938	8.82125	8.35389	8.57933	8.70668	8.94484	8.83793	8.83508	8.62315	9.21247	8.92168	8.5861	8.89069	-0.33558	-0.03099	0.30459	0.0902358	0.868134	0.0429797	1.04462	0.0614132	1.36674	5	5	5
Nedd4l	E3 ubiquitin-protein ligase NEDD4-like	8.22195	9.61446	7.93326	7.83282	8.23795	7.80307	8.01662	7.72834	7.64149	7.4118	7.90085	7.9073	7.73086	7.89312	8.01757	8.36809	7.72027	7.88994	-0.647822	-0.478146	0.169676	0.090318	0.17915	0.158558	1.04423	0.746782	0.799813	5	5	5
Ruvbl2	RuvB-like 2	9.94036	10.5704	9.59245	9.16968	9.71267	9.72239	9.16768	9.0804	9.24108	9.31287	9.41577	9.42144	9.36142	9.03576	9.36336	9.79711	9.30488	9.31955	-0.492227	-0.477562	0.0146654	0.0905342	0.0832173	0.914641	1.04319	1.07979	0.0387492	5	5	5
Txndc5	Thioredoxin domain-containing protein 5	6.03367		6.83368	6.55479	7.12779	7.71789	7.9202	7.45038	6.73379	6.75025	6.03843	5.87993	6.14585	6.08361	7.14095	6.63748	7.3145	6.25776	0.677022	-0.379727	-1.05675	0.0906776	0.283701	0.0131214	1.0425	0.547139	1.88202	4	5	5
Man1b1	Endoplasmic reticulum mannosyl-oligosaccharide 1,2-alpha-mannosidase	6.76578		7.11058	7.06964	7.25395	7.58648	8.1402	7.25267	7.31836	7.1343	6.9656	6.99868	7.42637	7.71486	8.29184	7.04999	7.4864	7.47947	0.436417	0.429485	-0.00693245	0.0907378	0.186758	0.98241	1.04221	0.728721	0.00770742	4	5	5
Hnrnpa3	Heterogeneous nuclear ribonucleoprotein A3	9.04733	10.039	9.2122	8.84654	9.11446	8.60484	8.73387	8.63037	9.23266	8.79865	9.17257	9.62722	9.24549	8.89051	9.07853	9.25191	8.80008	9.20287	-0.451833	-0.0490449	0.402788	0.0907551	0.842509	0.0418813	1.04213	0.0744257	1.37798	5	5	5
Ndufv2	NADH dehydrogenase [ubiquinone] flavoprotein 2, mitochondrial	10.9956	10.9588	10.744	9.96991	10.6514	10.7942	11.1136	11.4753	10.8964	11.1476	10.7113	10.9388	10.8554	10.6486	10.4161	10.6639	11.0854	10.714	0.421486	0.0500952	-0.371391	0.0909185	0.813988	0.0368351	1.04135	0.089382	1.43374	5	5	5
Ago2	Protein argonaute-2	7.97592	8.61208	7.98858	7.67122	8.20516	7.62782	7.98918	7.54861	7.93398	7.62939	7.76623	8.23392	7.88	8.02821	8.32876	8.09059	7.7458	8.04742	-0.344794	-0.0431673	0.301627	0.0912228	0.824035	0.0607333	1.0399	0.0840546	1.21657	5	5	5
Coro2a	Coronin-2A	10.03	11.107	9.5374	9.44665	10.0309	9.63705	9.72736	9.34583	9.18189	9.24355	9.72786	9.27986	9.13243	9.14548	8.94772	10.0304	9.42713	9.24667	-0.603264	-0.78373	-0.180466	0.091332	0.0414966	0.320198	1.03938	1.38199	0.494581	5	5	5
Sco2	Protein SCO2 homolog, mitochondrial	7.31985		6.77158			7.28568	7.93351	7.90699		7.57606	7.17969					7.04571	7.67556	7.17969	0.629847	0.133979	-0.495868	0.0913945	#DIV/0!	#DIV/0!	1.03908	#DIV/0!	#DIV/0!	2	4	1
Gna13	Guanine nucleotide-binding protein subunit alpha-13	9.64113	10.3361	9.78275	9.88415	9.82276	10.2313	10.0058	10.1021	10.2636	10.0828	9.92746	9.87817	9.91486	10.3102	10.4675	9.89338	10.1371	10.0996	0.243747	0.206261	-0.0374861	0.0914917	0.256361	0.78065	1.03862	0.591149	0.107543	5	5	5
Gstm1	Glutathione S-transferase Mu 1	7.75638	8.8928	7.82781	8.49057	7.78561	8.49878	8.7899	8.52926	8.69075	8.51798	8.04074	7.97102	7.79526	8.01824	8.48373	8.15064	8.60533	8.0618	0.454699	-0.0888395	-0.543539	0.0915601	0.738302	0.00276616	1.03829	0.131766	2.55812	5	5	5
Ugcg	Ceramide glucosyltransferase	9.02859	9.54097	8.54345	8.49866	8.87043	8.50477	8.77947	8.44829	8.46957	8.3326	8.30918	8.52559	8.35407	8.54466	8.9847	8.89642	8.50694	8.54364	-0.389479	-0.352776	0.0367024	0.0915915	0.153683	0.800633	1.03814	0.813374	0.0965664	5	5	5
Cul1	Cullin-1	6.53234	6.58886	6.65011	6.59035	6.66547	6.53555	6.87639	6.60966	6.89135	6.90467	6.73596	7.14687	6.76236	6.78926	6.95885	6.60543	6.76352	6.87866	0.158098	0.273233	0.115134	0.0915949	0.00982657	0.328539	1.03813	2.0076	0.483414	5	5	5
Mcur1	Mitochondrial calcium uniporter regulator 1			4.00598	4.0893	4.50976	5.234		5.66343	4.56534	4.41472	4.91815		4.87484			4.20168	4.96937	4.8965	0.76769	0.694813	-0.0728771	0.0921503	0.0412053	0.875948	1.0355	1.38505	0.0575215	3	4	2
Dnajb5	DnaJ homolog subfamily B member 5	7.95653	9.37942	7.50048	7.438	7.78891	7.3156	7.17807	7.47438	7.39399	7.27825	7.66501	8.03244	7.79612	8.09913	8.37626	8.01267	7.32806	7.99379	-0.684607	-0.0188755	0.665731	0.092278	0.96114	0.00107494	1.0349	0.0172131	2.96862	5	5	5
Sema7a	Semaphorin-7A	8.25723	9.27835	8.50838	8.64454	8.23962	8.20771	8.21165	8.21193	8.39147	8.00339	8.36415	8.37551	8.64781	8.71302	8.6706	8.58562	8.20523	8.55422	-0.380394	-0.0314055	0.348988	0.0923776	0.881473	0.00729109	1.03443	0.054791	2.13721	5	5	5
Aaas	Aladin	7.44274		7.23924	7.05397	7.13031	7.32855	7.71099	7.43768	7.34753	7.33604	7.13889	7.42136	7.17124	7.66265	7.86998	7.21656	7.43216	7.45282	0.215592	0.23626	0.0206676	0.092388	0.221621	0.899409	1.03438	0.65439	0.046043	4	5	5
Prpsap2	Phosphoribosyl pyrophosphate synthase-associated protein 2	8.1722		8.20728	8.38988	8.53154	8.85987	8.92903	8.8036	8.3724	8.29088	8.10633	8.02196	7.85538	7.87365	7.98939	8.32523	8.65116	7.96934	0.325929	-0.355885	-0.681814	0.0924779	0.00574179	0.00127525	1.03396	2.24095	2.89441	4	5	5
Stx8	Syntaxin-8	8.91682		8.78375	9.08977	8.76517	8.78142	7.79745	8.82415	8.36476	8.5297	8.52803	8.06644	7.93836	8.54539	8.35534	8.88888	8.4595	8.28671	-0.42938	-0.602164	-0.172784	0.0925348	0.00575527	0.459417	1.03369	2.23993	0.337793	4	5	5
Entpd1	Ectonucleoside triphosphate diphosphohydrolase 1	8.62804	10.0734	9.03644	9.2397	9.09262	9.16377	8.58238	8.81329	8.5345	8.34344	8.77905	8.67012	8.49751	8.27693	8.47194	9.21404	8.68748	8.53911	-0.526565	-0.674929	-0.148364	0.0929119	0.0283888	0.39511	1.03193	1.54685	0.403282	5	5	5
Sec11c	Signal peptidase complex catalytic subunit SEC11C	7.16552	7.13906	6.96141	6.89502	6.9084	7.02749	7.50859	7.07237	7.21222	7.21936	6.9733	7.04452	7.2948	7.57851	7.53681	7.01388	7.20801	7.28559	0.194123	0.271706	0.0775831	0.0935592	0.0812561	0.617498	1.02891	1.09014	0.209365	5	5	5
Camk2d	Calcium/calmodulin-dependent protein kinase type II subunit delta	11.2821	11.8193	10.9147	11.0262	11.4744	11.0134	11.0809	11.0655	10.8822	10.8804	11.1797	11.14	10.9143	10.7812	10.7934	11.3033	10.9845	10.9617	-0.318857	-0.341605	-0.0227485	0.0935926	0.0981555	0.816749	1.02876	1.00809	0.0879112	5	5	5
Ldha	L-lactate dehydrogenase A chain	10.5239	11.9221	10.5373	11.0429	10.5633	11.2286	11.9268	11.4632	11.4466	11.3275	10.6871	10.8491	10.6567	11.0367	11.545	10.9179	11.4785	10.9549	0.560625	0.0369877	-0.523637	0.0936612	0.909242	0.0318548	1.02844	0.0413207	1.49682	5	5	5
Scfd1	Sec1 family domain-containing protein 1	7.06641		6.92958	6.36194	6.67117	6.68939	6.38091	6.20116	6.57447	6.28749	6.27563	7.00711	6.5815	5.88019	6.44207	6.75727	6.42668	6.4373	-0.330589	-0.319973	0.0106164	0.0936627	0.241092	0.960079	1.02843	0.617818	0.0176929	4	5	5
Ahcy	Adenosylhomocysteinase	8.44881	9.43732	8.32618	8.69017	8.59316	8.90438	9.36759	9.02349	9.18892	9.01564	8.68957	8.52511	8.51663	8.63507	8.98892	8.69913	9.1	8.67106	0.400877	-0.0280644	-0.428942	0.0937233	0.898342	0.00664166	1.02815	0.0465584	2.17772	5	5	5
Sec24c	Sec24 related gene family, member C (S. cerevisiae)	8.6205	9.0788	8.57914	7.96141	8.0993	8.2722	7.63988	7.63957	8.10269	8.31433	8.05421	8.4729	7.94594	7.31325	7.56043	8.46783	7.99374	7.86935	-0.474094	-0.598482	-0.124388	0.0938422	0.0679568	0.632431	1.0276	1.16777	0.198987	5	5	5
Trap1	Heat shock protein 75 kDa, mitochondrial	10.7801	11.1001	11.0816	10.9246	11.0782	10.8969	11.1135	10.6485	9.7292	9.69329	10.8895	10.2421	10.141	9.27538	9.0484	10.9929	10.4163	9.91929	-0.576633	-1.07363	-0.496998	0.0939945	0.0138918	0.3006	1.0269	1.85724	0.522011	5	5	5
Lpgat1	Acyl-CoA:lysophosphatidylglycerol acyltransferase 1	7.41538	7.53529	7.21408	6.95198	6.70904	7.37596	7.19203	7.52769	7.86443	7.67223	7.55758	7.85662	8.15201	8.61891	9.03583	7.16515	7.52647	8.24419	0.361318	1.07903	0.717717	0.0943839	0.00756204	0.0377665	1.0251	2.12136	1.42289	5	5	5
Ssr4	Translocon-associated protein subunit delta	8.98653	9.18344	8.60048	8.72842	8.73834	8.75947	9.22038	9.2661	9.27611	9.06915	8.93318	9.50933	9.36207	10.0459	10.3685	8.84744	9.11824	9.6438	0.2708	0.796357	0.525557	0.0944324	0.019906	0.0892384	1.02488	1.70102	1.04945	5	5	5
Dad1	Dolichyl-diphosphooligosaccharide--protein glycosyltransferase subunit DAD1	9.5294	10.1727	8.81064	8.90272	9.18637	8.9042	9.14788	8.82931	8.66091	8.49222	8.96863	8.70964	9.39815	9.07284	9.00949	9.32036	8.8069	9.03175	-0.513454	-0.288607	0.224847	0.0947485	0.317612	0.189089	1.02343	0.498103	0.723334	5	5	5
Tmed7	Transmembrane p24 trafficking protein 7	10.1277	9.65896	9.64565	9.78447	10.0796	9.3316	9.66629	9.29927	9.98916	9.45845	9.59417	9.86067	9.8247	10.5632	11.1502	9.85928	9.54896	10.1986	-0.310324	0.339302	0.649626	0.0949383	0.299365	0.0730161	1.02256	0.523799	1.13658	5	5	5
Mtco2	Cytochrome c oxidase subunit 2	11.513	11.4143	11.0407	10.4939	11.3094	11.5435	12.1315	12.1682	11.0848	11.4628	11.001	11.4529	11.183	11.0696	10.8749	11.1543	11.6782	11.1163	0.523898	-0.0379976	-0.561896	0.0949549	0.859237	0.0400635	1.02248	0.0658871	1.39725	5	5	5
Atp1a3	Sodium/potassium-transporting ATPase subunit alpha-3	14.5742	14.1119	14.7817	14.892	14.8394	14.6511	14.9774	15.142	15.058	14.9331	14.5088	14.7611	14.62	15.4346	15.4209	14.6398	14.9523	14.9491	0.312444	0.309226	-0.0032183	0.0951261	0.242786	0.988487	1.0217	0.614777	0.00502902	5	5	5
Dbi	Acyl-CoA-binding protein	7.8576		8.08711	9.07516	7.69172	8.42829	8.58286	8.6803	9.35834	9.04842	8.84017	8.13438	8.3859	8.65666	9.43316	8.1779	8.81964	8.69005	0.641742	0.512154	-0.129587	0.0952049	0.208805	0.653815	1.02134	0.680259	0.184545	4	5	5
Rnf185	E3 ubiquitin-protein ligase RNF185	7.59226		7.44758	7.31159	7.88821	7.87605		7.85865	8.06179	7.63762	7.48065	7.5419	7.78175	8.35008	8.27576	7.55991	7.85853	7.88603	0.29862	0.326115	0.0274957	0.0953018	0.204221	0.903951	1.0209	0.6899	0.0438553	4	4	5
Fcgrt	IgG receptor FcRn large subunit p51	7.38964		7.1249	6.80472	7.22852	6.99706	7.1312	6.65724	6.72894	6.34867	7.02489	6.81919	6.45875	6.73834	6.95975	7.13694	6.77262	6.80018	-0.364321	-0.33676	0.0275611	0.095501	0.0679977	0.874433	1.01999	1.16751	0.0582733	4	5	5
Ptges2	Prostaglandin E synthase 2	7.14677		7.27406	7.16923	7.35335	7.39302	7.71264	7.95796	7.21094	7.40777	7.20806	7.61193	7.00822	6.60476	6.85202	7.23585	7.53647	7.057	0.300617	-0.17885	-0.479467	0.095653	0.395471	0.0570309	1.0193	0.402885	1.24389	4	5	5
Porcn	Protein-serine O-palmitoleoyltransferase porcupine	9.74883	9.26958	9.15622	9.43123	9.12416	9.32301	9.40297	8.86081	8.39852	8.5938	9.38707	8.96408	10.1151	9.05409	9.31663	9.346	8.91582	9.3674	-0.430181	0.0213916	0.451572	0.0956847	0.929031	0.149065	1.01916	0.0319698	0.826625	5	5	5
Atraid	All-trans retinoic acid-induced differentiation factor	8.70978	9.71117	8.44541	8.51066	8.55397	8.18677	8.42957	8.48729	8.29328	8.25093	7.87643	8.5639	8.29502	8.57406	8.27128	8.7862	8.32957	8.31614	-0.456628	-0.470061	-0.0134331	0.0957512	0.116936	0.925394	1.01886	0.932052	0.0336731	5	5	5
Dgke	Diacylglycerol kinase epsilon	8.24253	8.50184	8.14132	8.00128	8.01664	8.18947	8.6201	8.40173	8.43069	8.34641	8.28104	8.19028	8.4829	8.94862	9.15239	8.18072	8.39768	8.61105	0.216957	0.430325	0.213368	0.0957526	0.0739295	0.318854	1.01885	1.13118	0.496408	5	5	5
Impa1	Inositol monophosphatase 1	8.44572	9.04749	8.76474	8.79336	8.78355	8.8841	8.99963	8.83962	9.01445	9.106	8.82374	9.113	8.74906	8.90668	9.08193	8.76697	8.96876	8.93488	0.201788	0.167912	-0.033877	0.0957947	0.196398	0.702821	1.01866	0.706862	0.153155	5	5	5
Stard3nl	STARD3 N-terminal-like protein	8.8433	9.94118	7.98957	8.79153	8.10064	7.92302	8.51376	6.61353		7.82145	7.66524	7.91417	8.17542	7.86738	7.64165	8.73324	7.71794	7.85277	-1.01531	-0.880473	0.134833	0.0958232	0.0409037	0.724088	1.01853	1.38824	0.140209	5	4	5
Abhd13	Protein ABHD13	8.70741	9.93621	7.99102	7.74447	8.77375	8.11354	8.36957	7.63414	7.73092	7.27398	7.76936	7.65131	8.20445	7.9817	8.34947	8.63057	7.82443	7.99126	-0.806143	-0.639316	0.166827	0.0960144	0.152181	0.490774	1.01766	0.817641	0.309119	5	5	5
Abcc9	ATP-binding cassette sub-family C member 9	5.82345		5.57814	4.70836			7.63682		6.33039	6.02988		6.76039	6.35113	4.29886		5.36998	6.66569	5.80346	1.29571	0.433478	-0.862233	0.0962074	0.630386	0.395763	1.01679	0.200394	0.402564	3	3	3
Ddx39b	Spliceosome RNA helicase Ddx39b	8.27864	9.21912	8.41552	7.97815	8.41159	7.83022	8.062	7.87984	8.30002	8.13283	7.84695	8.68128	8.19362	7.28855	7.48239	8.4606	8.04098	7.89856	-0.41962	-0.562048	-0.142428	0.0962913	0.120543	0.604246	1.01641	0.918859	0.218786	5	5	5
Atp2a3	Sarcoplasmic/endoplasmic reticulum calcium ATPase 3	11.06	13.1516	10.3816	10.1557	10.2087	8.93802	10.6904	9.97237	9.20183	10.0765	10.5596	9.90809	11.1618	10.7477	11.1283	10.9915	9.77582	10.7011	-1.2157	-0.290422	0.92528	0.0967007	0.64581	0.0450875	1.01457	0.189895	1.34594	5	5	5
Atp5f1b	ATP synthase subunit beta, mitochondrial	12.3236	12.4466	12.1685	11.5743	12.5342	12.1034	12.8793	13.2734	12.4666	12.7723	12.1724	12.8718	12.3935	12.308	12.0377	12.2095	12.699	12.3567	0.489542	0.147216	-0.342326	0.0969363	0.525679	0.196636	1.01351	0.279279	0.706337	5	5	5
Mpst	3-mercaptopyruvate sulfurtransferase	7.29304		7.18605	7.01644	7.51144	7.47392	7.74147	7.17874	7.58077	7.64987	7.3612	7.87091	7.56083	7.24188	7.32483	7.25174	7.52495	7.47193	0.27321	0.220188	-0.0530222	0.0971594	0.203173	0.730558	1.01252	0.692134	0.136345	4	5	5
Pcdh1	Protocadherin 1	8.94917	10.24	8.98613	8.99804	9.27424	8.7576	8.49698	9.04193	8.63216	9.01922	8.67196	8.72835	8.83697	8.62152	8.58204	9.28952	8.78958	8.68817	-0.499941	-0.601348	-0.101407	0.0978963	0.0419316	0.406184	1.00923	1.37746	0.391278	5	5	5
Txndc15	Thioredoxin domain-containing protein 15	6.72089	5.65876	6.36892	6.40239	6.2294	6.24882	6.79734	6.67131	6.92085	6.68701	6.7128	6.92965	7.47431	7.89833	8.0707	6.27607	6.66507	7.41716	0.388997	1.14109	0.752091	0.0979093	0.00690983	0.0308151	1.00918	2.16053	1.51124	5	5	5
Mmp17	Matrix metalloproteinase-17			7.25719	7.25945	6.82134		7.94381	7.35871	8.41261	7.36614		7.37614	7.72712	7.5406		7.11266	7.77032	7.54795	0.65766	0.435295	-0.222365	0.0985464	0.0702381	0.508551	1.00636	1.15343	0.293666	3	4	3
Drg1	Developmentally-regulated GTP-binding protein 1	6.5072		6.43074	6.15048	6.35805	6.33279	6.02104	5.93424	6.36568	5.8398	6.30636	7.26621	6.71281	6.2973	7.14349	6.36162	6.09871	6.74524	-0.262904	0.383619	0.646523	0.0987007	0.153764	0.02246	1.00568	0.813145	1.64859	4	5	5
Slc6a3	Sodium-dependent dopamine transporter	9.77946	8.76503	9.84731	10.0428	10.0398	10.1928	10.0129	10.1515	10.9343	9.95363	10.3127	10.3435	10.6484	11.2295	11.3879	9.69489	10.249	10.7844	0.554134	1.08952	0.535383	0.0987346	0.0102862	0.0969892	1.00553	1.98774	1.01328	5	5	5
Eif4e	Eukaryotic translation initiation factor 4E	9.54438	10.7157	9.36116	8.84532	9.35955	9.2086	8.87475	8.65259	8.96428	9.09546	8.766	9.41916	8.93811	8.56747	9.20638	9.56521	8.95914	8.97943	-0.606077	-0.585787	0.0202906	0.0988895	0.128468	0.912742	1.00485	0.891205	0.039652	5	5	5
Pikfyve	1-phosphatidylinositol 3-phosphate 5-kinase	7.81566	9.61774	8.12089	8.13416	8.19922	7.76173	7.47089	7.63412	7.99752	7.93175	8.3848	8.53504	8.66899	8.41323	8.61528	8.37753	7.7592	8.52347	-0.618333	0.145934	0.764268	0.09901	0.662295	0.000126476	1.00432	0.178948	3.89799	5	5	5
Ehd3	EH domain-containing protein 3	10.4333	11.3837	10.71	10.5297	10.7068	10.4399	10.3772	10.2549	10.5546	10.5092	10.4432	10.8493	10.4111	10.5824	10.8117	10.7527	10.4272	10.6196	-0.32555	-0.133154	0.192397	0.0991015	0.502573	0.104567	1.00392	0.298801	0.980604	5	5	5
Tuba8	Tubulin alpha-8 chain	8.39134	10.1767	8.49262	8.00225	8.31222	8.12137	7.89598	7.89242	7.98075	7.87641	7.95377	7.99104	7.90011	7.30123	7.88077	8.67502	7.95339	7.80538	-0.72163	-0.869636	-0.148006	0.0991882	0.0639747	0.306512	1.00354	1.19399	0.513553	5	5	5
Agap3	Arf-GAP with GTPase, ANK repeat and PH domain-containing protein 3	6.69175	7.89701	6.65797	6.90817	6.94185	6.37044	7.0314	6.40228	6.31899	6.53865	6.59587	6.81814	6.5975	6.73925	6.82438	7.01935	6.53235	6.71503	-0.486999	-0.304323	0.182676	0.0992264	0.226249	0.226567	1.00337	0.645414	0.644803	5	5	5
Dgkg	Diacylglycerol kinase gamma	8.10973	9.01103	7.84674	7.68219	7.94594	7.94884	7.8571	7.41686	7.35807	7.58026	7.90239	7.55751	7.50617	7.30685	8.07809	8.11913	7.63223	7.6702	-0.486899	-0.448924	0.0379754	0.099434	0.137793	0.840463	1.00247	0.860772	0.0754816	5	5	5
Abce1	ATP-binding cassette sub-family E member 1	8.41382	9.52594	8.39884	8.31116	8.35162	8.24825	7.92186	8.05762	8.33322	8.17587	8.42963	8.61137	8.31442	8.32286	8.32066	8.60028	8.14736	8.39979	-0.452911	-0.20049	0.252421	0.0994721	0.425957	0.0253927	1.0023	0.370634	1.59529	5	5	5
B3GNT2	N-acetyllactosaminide beta-1,3-N-acetylglucosaminyltransferase 2			6.36989	5.77535					7.20477	6.89662		7.29154	7.30237	7.14455	8.04181	6.07262	7.05069	7.44507	0.978074	1.37245	0.394374	0.0999333	0.0178309	0.282112	1.00029	1.74883	0.549579	2	2	4
Rpl15	Large ribosomal subunit protein eL15	9.83054	10.0969	9.88788	9.61993	9.772	9.86214	9.88359	10.1616	10.2964	10.0589	10.2722	10.5775	10.2979	9.84069	10.1548	9.84145	10.0525	10.2286	0.21109	0.387169	0.176079	0.0999621	0.0263273	0.259289	1.00016	1.57959	0.586216	5	5	5
Kcna6	Potassium voltage-gated channel subfamily A member 6	9.00383	11.4928	8.99186	9.27874	8.74601	8.6759	8.35422	8.62001	8.50906	8.6317	9.03125	8.84563	9.45821	8.98305	8.59461	9.50264	8.55818	8.98255	-0.944467	-0.520094	0.424373	0.100021	0.34997	0.0238044	0.999908	0.455969	1.62334	5	5	5
Lman1	Protein ERGIC-53	7.88997	10.3218	7.52479	7.08505	7.51238	8.95233	9.39415	9.11682	9.29384	9.00148	7.45033	7.7203	7.72196	8.39045	8.50188	8.0668	9.15173	7.95698	1.08492	-0.109823	-1.19475	0.100338	0.862439	0.000681143	0.998537	0.0642716	3.16676	5	5	5
Tra2a	Transformer-2 protein homolog alpha	7.18227		6.9344	6.95301	6.81185				6.74919	6.69303	6.47401	7.56757	6.70888	6.94491	7.50814	6.97038	6.72111	7.0407	-0.24927	0.0703226	0.319593	0.10047	0.790345	0.41821	0.997964	0.102183	0.378606	4	2	5
Kiaa0513	Uncharacterized protein KIAA0513	8.43552	10.1512	8.4294	8.02972	8.55148	8.20524	8.05309	7.98981	7.96811	7.93057	8.32813	8.51359	8.13832	7.76673	7.98251	8.71945	8.02937	8.14586	-0.690089	-0.573599	0.11649	0.100553	0.18054	0.425795	0.997604	0.743427	0.370799	5	5	5
Slc8a3	Sodium/calcium exchanger 3	8.32751		7.70425	7.79234	7.47476	7.60928	7.37969	7.25046	7.46877	7.69409	7.72967	7.38208	7.63901	7.62634	7.78397	7.82471	7.48046	7.63221	-0.344256	-0.1925	0.151756	0.100719	0.312192	0.18647	0.996887	0.505578	0.729391	4	5	5
Mon1a	Vacuolar fusion protein MON1 homolog A	8.78661	10.5853	8.52209	8.173	8.82962	8.18592	8.5635	8.11807	8.16916	7.83751	8.20377	8.42664	8.20841	8.01542	8.63097	8.97931	8.17483	8.29704	-0.804484	-0.682271	0.122212	0.100868	0.152406	0.458465	0.996246	0.816997	0.338693	5	5	5
Tubgcp3	Gamma-tubulin complex component 3	6.24993		7.00783	6.77082	6.99743	6.89211	7.36369	6.73559	7.65556	7.73111	7.58827	8.45503	8.14523	7.55999	8.29957	6.7565	7.27561	8.00962	0.519111	1.25312	0.734005	0.101012	0.001958	0.0271029	0.995626	2.70819	1.56698	4	5	5
Eif3f	Eukaryotic translation initiation factor 3 subunit F	8.74485	9.67557	8.23974	7.86871	8.3516	8.32604	8.00976	7.75392	7.86203	7.93719	7.84507	8.1937	7.76396	7.19977	7.70181	8.57609	7.97779	7.74086	-0.598307	-0.835232	-0.236926	0.101259	0.0428345	0.240445	0.994565	1.36821	0.618984	5	5	5
Cyp2d22	Cytochrome P450	8.952	9.59866	8.83938	8.52555	8.79237	9.02757	9.33006	9.41775	9.41302	9.29941	8.93849	9.01823	9.05978	9.32115	9.50341	8.94159	9.29756	9.16821	0.355971	0.22662	-0.129351	0.101262	0.306381	0.339594	0.994554	0.513738	0.46904	5	5	5
Sptb	Spectrin beta chain, erythrocytic	7.24268	9.25778	7.18376	7.04515	7.31432	6.99498	6.45677	6.72637	7.09174	6.80641	6.92612	7.29706	7.11499	6.92349	6.96431	7.60874	6.81525	7.0452	-0.793485	-0.563543	0.229941	0.101641	0.217338	0.119955	0.99293	0.662864	0.920983	5	5	5
Epb41l3	Band 4.1-like protein 3	10.5593	11.1603	10.7057	10.6461	10.5765	10.7734	11.0283	10.8597	11.0603	11.1063	10.6792	10.8398	10.7243	10.973	10.984	10.7296	10.9656	10.8401	0.236013	0.110483	-0.12553	0.101845	0.410107	0.19617	0.992062	0.387103	0.707368	5	5	5
Ehd4	EH domain-containing protein 4	8.49896	9.73628	8.33176	8.06569	8.50234	8.31545	8.28532	7.68511	8.05647	7.91819	8.0759	8.16905	7.9387	7.68855	8.00116	8.62701	8.05211	7.97467	-0.574897	-0.652334	-0.0774362	0.102198	0.0611932	0.602596	0.990557	1.2133	0.219974	5	5	5
Csnk2a2	Casein kinase II subunit alpha'	7.51635	8.28134	7.69149	7.75308	7.70759	7.79611	8.44693	7.98072	8.1911	8.09175	7.90777	8.10091	8.03822	8.19295	8.3736	7.78997	8.10132	8.12269	0.311352	0.332721	0.0213688	0.102229	0.0586381	0.876889	0.990424	1.23182	0.0570552	5	5	5
Psmd1	26S proteasome non-ATPase regulatory subunit 1	9.32418	9.93481	9.18296	8.66044	9.18876	8.90926	8.97688	8.6479	8.93074	8.87454	9.00647	9.3866	9.14383	8.26868	8.72202	9.25823	8.86786	8.90552	-0.390365	-0.352709	0.0376565	0.102356	0.243239	0.855667	0.989886	0.613967	0.0676953	5	5	5
Actr10	Actin-related protein 10	7.47691		7.65956	7.88316	7.97377	7.50831	7.79554	7.52267	7.14333	7.22176	7.57637	7.46672	7.2602	6.93619	7.45765	7.74835	7.43832	7.33943	-0.310028	-0.408923	-0.0988954	0.102516	0.0391205	0.559898	0.989208	1.4076	0.251891	4	5	5
Pdcd6ip	Programmed cell death 6-interacting protein	8.0947	6.57081	7.99513	8.04783	8.03029	8.2438	8.27994	8.23598	8.47475	8.25073	8.01298	8.27671	8.0604	7.98409	8.19498	7.74775	8.29704	8.10583	0.549289	0.358081	-0.191208	0.102625	0.266737	0.0287441	0.988746	0.573917	1.54145	5	5	5
Fxyd7	FXYD domain-containing ion transport regulator 7	10.7469	11.6637	10.985	11.2988	11.418	11.2158	11.4848	11.7351	11.5836	12.1428	11.4927	11.615	11.1373	12.1732	11.3249	11.2225	11.6324	11.5486	0.409892	0.326129	-0.0837634	0.102691	0.208777	0.728514	0.988469	0.680317	0.137562	5	5	5
Sf3b3	Splicing factor 3B subunit 3	9.26993	10.264	8.75488	8.59946	9.00706	8.85252	8.71267	8.41309	8.63092	8.48166	8.6651	8.92753	8.60318	8.39149	8.70758	9.17906	8.61817	8.65897	-0.560893	-0.520089	0.0408045	0.102812	0.128258	0.736323	0.987956	0.891917	0.132932	5	5	5
Srd5a3	Polyprenol reductase			3.91253	2.15236				4.74327	4.43642	4.55237	3.86602	4.84825	4.96019	5.48343	7.21444	3.03244	4.57735	5.27447	1.54491	2.24202	0.697113	0.103135	0.0820771	0.381044	0.986595	1.08578	0.419025	2	3	5
Strn3	Striatin-3	9.40354	10.1621	9.32893	8.9207	9.77541	9.21977	9.65981	8.68097	8.82677	8.42488	8.67741	8.40595	8.61606	7.39079	7.92044	9.51813	8.96244	8.20213	-0.555689	-1.316	-0.760308	0.103182	0.00345004	0.0475842	0.986396	2.46218	1.32254	5	5	5
Akt3	RAC-gamma serine/threonine-protein kinase	7.86536		7.6429	7.0703	7.67781	7.0056	6.77873	6.84975	7.51311	7.48899	7.23025	8.16381	7.73617	7.6483	8.12396	7.56409	7.12723	7.7805	-0.436857	0.216404	0.653261	0.10331	0.408087	0.0228069	0.985857	0.389247	1.64193	4	5	5
Slc25a25	Mitochondrial adenyl nucleotide antiporter SLC25A25	7.67116	8.76263	7.20227	6.92041	7.45997	8.01578	8.49067	8.5497	8.03343	8.03542	7.37807	7.63808	7.46083	7.49901	7.51807	7.60329	8.225	7.49881	0.621714	-0.104476	-0.726191	0.10339	0.751507	0.000471084	0.985522	0.124067	3.3269	5	5	5
S100a13	Protein S100-A13	9.15983	11.1854	8.89845	9.38482	9.4339	9.08229	9.0361	8.82007	8.69319	8.63047	9.29262	8.91242	8.66289	8.74827	8.50906	9.61248	8.85242	8.82505	-0.76006	-0.787433	-0.0273735	0.103991	0.101776	0.869477	0.983003	0.992355	0.0607417	5	5	5
Rack1	Small ribosomal subunit protein RACK1	9.21444	9.44731	8.86385	8.66409	8.88822	8.6329	9.20469	8.4515	8.56451	8.35951	8.77058	8.66705	8.71574	8.48608	8.60447	9.01558	8.64262	8.64878	-0.372958	-0.366798	0.00615954	0.104075	0.0379947	0.969477	0.982655	1.42028	0.0134625	5	5	5
Pacc1	Proton-activated chloride channel	8.44072		8.22631	8.311	8.18856	8.54655	8.60438	8.31455	8.39164	8.35428	8.48544	8.5431	8.48113	8.49931	8.92515	8.29165	8.44228	8.58683	0.150632	0.295178	0.144545	0.104141	0.0296957	0.195326	0.982379	1.52731	0.70924	4	5	5
Rps28	Small ribosomal subunit protein eS28	7.85402	9.6791	7.7123	7.64159	8.0589	7.0818	7.76883	7.15753	7.95435	7.11988	7.66222	7.53657	7.71653	7.13155	7.65559	8.18918	7.41648	7.54049	-0.772703	-0.648689	0.124014	0.104273	0.138185	0.576332	0.981827	0.85954	0.239327	5	5	5
Atp1a4	Sodium/potassium-transporting ATPase subunit alpha-4	14.6885	16.6822	14.2923	14.3732	14.976	14.4328	14.54	14.2384	13.8839	13.6085	14.0519	13.1813	13.7809	13.965	13.4686	15.0025	14.1407	13.6896	-0.861754	-1.3129	-0.451145	0.104294	0.0225911	0.0937927	0.981742	1.64606	1.02783	5	5	5
Ryr2	Ryanodine receptor 2	11.0006	11.4272	10.9178	10.7558	10.785	10.6682	10.8183	10.7261	10.8438	10.6733	10.7141	10.8295	11.0947	11.3103	11.4971	10.9773	10.746	11.0891	-0.231341	0.111846	0.343187	0.104388	0.570774	0.0514336	0.981348	0.243536	1.28875	5	5	5
Arpc1b	Actin-related protein 2/3 complex subunit 1B	6.90916		6.47634	6.36463	6.78028	6.89243	7.01406	6.76241	6.91582	6.74712	6.54704	6.97443	6.89218	6.69388	7.40843	6.6326	6.86637	6.90319	0.233765	0.270587	0.0368228	0.104493	0.219267	0.818295	0.980912	0.659027	0.0870898	4	5	5
Sez6	Seizure protein 6	7.81985	7.31796	7.64719	7.93393	7.83283	7.72913	7.77493	8.06947	8.38326	8.06293	8.18588	8.30926	8.3731	8.81563	8.9775	7.71035	8.00394	8.53227	0.293589	0.821918	0.528329	0.10458	0.00239054	0.0261482	0.980551	2.6215	1.58256	5	5	5
Lrrc7	Leucine-rich repeat-containing protein 7	7.63628	9.25673	6.80154	7.21702	7.21298	7.107	6.70828	7.03163	6.82036	6.35349	6.74668	6.51072	6.75803	6.90589	6.52019	7.62491	6.80415	6.6883	-0.820759	-0.936609	-0.11585	0.104998	0.0636867	0.47213	0.978821	1.19595	0.325938	5	5	5
Odr4	Protein odr-4 homolog	7.34818	8.56212	7.36856	7.25635	7.32142	7.26587	7.12424	7.00321	7.03063	7.12388	7.4276	7.60089	7.54713	7.56774	7.38027	7.57133	7.10957	7.50473	-0.461761	-0.0666033	0.395157	0.10501	0.798278	0.00023445	0.978768	0.0978457	3.62995	5	5	5
Fxyd6	FXYD domain-containing ion transport regulator 6	8.39292	9.33456	9.09325	9.98552	9.4219	8.33866	9.26373	8.63256	8.63076	8.62095	7.63938	7.92006	7.97106	9.35073	8.67104	9.24563	8.69733	8.31045	-0.548302	-0.935178	-0.386877	0.105066	0.0493886	0.295931	0.97854	1.30637	0.528809	5	5	5
Psen1	Presenilin-1	8.32774	10.3771	8.52032	8.23618	8.697	8.33402	7.67675	8.27398	8.06647	8.05305	8.23963	7.92573	8.25565	8.07666	7.77821	8.83167	8.08086	8.05518	-0.750817	-0.776498	-0.0256811	0.105121	0.091487	0.865905	0.97831	1.03864	0.06253	5	5	5
H1-3	Histone H1.3	9.19132	10.6106	8.90651	8.64116	8.80327	9.72594	9.49615	9.92446	11.2196	10.037	9.12072	9.59448	9.09569	9.17735	9.55659	9.23058	10.0806	9.30897	0.850047	0.0783851	-0.771662	0.10521	0.838796	0.0417945	0.977944	0.0763438	1.37888	5	5	5
Epha7	Ephrin type-A receptor 7	7.82944	8.37653	7.59627	7.72135	7.83622	7.6947	7.74025	7.62396	7.47584	7.52408	7.73591	7.44416	7.8064	7.71967	7.83716	7.87196	7.61177	7.70866	-0.260195	-0.163302	0.0968929	0.105268	0.309632	0.290516	0.977702	0.509155	0.53683	5	5	5
Cox7a2l	Cytochrome c oxidase subunit 7A-related protein, mitochondrial	7.50199		7.06058		7.67374	8.04975	8.37286	8.2477		7.37664	8.80825					7.4121	8.01174	8.80825	0.599634	1.39614	0.79651	0.105395	#DIV/0!	#DIV/0!	0.977179	#DIV/0!	#DIV/0!	3	4	1
Smpd1	Sphingomyelin phosphodiesterase	7.29003	8.80982	7.11596	7.45261	7.2891	6.64851	7.00191	6.27956	7.75153	6.6579	6.48538	7.31754	6.36817	7.6022	7.42345	7.5915	6.86788	7.03935	-0.723623	-0.552156	0.171466	0.105669	0.205518	0.643054	0.97605	0.68715	0.191752	5	5	5
Cyrib	CYFIP-related Rac1 interactor B	7.65279	8.74833	7.5413	7.52498	7.8024	7.46002	7.65701	7.27729	7.26593	7.4229	7.19431	7.68276	7.249	7.10204	7.2515	7.85396	7.41663	7.29592	-0.437333	-0.55804	-0.120707	0.105743	0.0561658	0.355898	0.975749	1.25053	0.448674	5	5	5
Lancl1	Glutathione S-transferase LANCL1	9.13576	10.4595	9.14745	9.05087	9.33692	8.89313	9.24055	8.75117	8.90449	8.83161	9.14996	9.32995	9.0569	8.95088	9.07162	9.42609	8.92419	9.11186	-0.501903	-0.314234	0.18767	0.106006	0.278042	0.111006	0.974668	0.55589	0.954653	5	5	5
Hnrnpm	Heterogeneous nuclear ribonucleoprotein M	8.34305	9.99086	8.35911	8.1197	8.60077	8.06474	8.05017	7.75523	8.40428	7.93374	8.25345	8.20174	8.2449	7.742	7.11204	8.6827	8.04163	7.91083	-0.641068	-0.771872	-0.130804	0.106218	0.0912356	0.608728	0.973801	1.03984	0.215577	5	5	5
Gpr155	G protein-coupled receptor 155	8.42993	9.80609	7.97561	8.28282	8.06706	7.83825	8.15409	7.71086	8.00515	7.73546	8.90341	8.57507	9.13046	9.01218	8.63184	8.5123	7.88876	8.85059	-0.623541	0.338287	0.961828	0.107115	0.362138	0.000107548	0.970151	0.441126	3.9684	5	5	5
Tmem205	Transmembrane protein 205	8.76142	8.42628	8.2377	8.14698	8.24138	8.62682	8.5417	8.49303	8.65447	8.52925	8.49057	8.25473	8.52377	9.00049	8.99642	8.36275	8.56905	8.6532	0.2063	0.290443	0.0841431	0.107217	0.153945	0.593839	0.969738	0.812634	0.226331	5	5	5
Sri	Sorcin	8.27522	10.4308	7.95419	7.985	8.45992	7.92647	8.19625	7.78638	7.26669	7.48697	7.81167	7.22878	7.39614	7.45726	7.97542	8.62103	7.73255	7.57385	-0.888474	-1.04717	-0.158699	0.107389	0.0616984	0.479311	0.969041	1.20973	0.319383	5	5	5
Psmd11	26S proteasome non-ATPase regulatory subunit 11	9.54415	10.4365	9.48037	9.03084	9.38522	9.26024	9.03876	8.87929	9.23817	9.24404	9.39897	9.88557	9.44689	8.69974	9.08736	9.57542	9.1321	9.30371	-0.443315	-0.27171	0.171605	0.107551	0.399422	0.440108	0.968387	0.398568	0.35644	5	5	5
Arhgef2	Rho guanine nucleotide exchange factor 2	9.90731	11.3169	9.73054	9.74409	10.047	9.60692	9.62889	9.50435	9.75589	9.52312	9.75419	9.91158	9.94474	9.80158	9.95524	10.1492	9.60383	9.87347	-0.545346	-0.275711	0.269635	0.107601	0.385515	0.00208432	0.968183	0.413959	2.68104	5	5	5
Ptma	Prothymosin alpha	7.50846	7.87688	7.73554	8.43692	7.42172	8.40423	7.62763	8.38382	9.72887	8.32199	8.18151	7.69646	7.89758	7.84178	8.08131	7.7959	8.49331	7.93973	0.697407	0.143828	-0.553579	0.107879	0.490623	0.154166	0.967063	0.309252	0.812011	5	5	5
Fndc3a	Fibronectin type-III domain-containing protein 3A	7.67514	7.07376		6.84973	7.8566	7.76751		8.21701		7.89317	7.63154	7.34955	7.90324	7.72902	7.99811	7.36381	7.95923	7.72229	0.595425	0.358485	-0.23694	0.108089	0.188984	0.235601	0.96622	0.723576	0.627824	4	3	5
Mbp	Myelin basic protein	12.2916	11.7255	12.6092	12.8489	12.5665	12.6175	12.9761	12.6772	12.8423	12.7582	12.9659	12.8948	12.5552	12.7214	13.0059	12.4083	12.7743	12.8286	0.365939	0.420322	0.0543825	0.108152	0.0800758	0.618518	0.965965	1.0965	0.208648	5	5	5
Vangl2	Vang-like protein 2	7.69479		6.77136	6.97711	6.40364	7.75853	7.07629	7.29419	7.67563	7.56644	7.5723	7.70257	7.56703	8.25886	8.08873	6.96173	7.47422	7.8379	0.512489	0.876171	0.363682	0.108251	0.018707	0.0921368	0.96557	1.72799	1.03557	4	5	5
Map2k1	Dual specificity mitogen-activated protein kinase kinase 1	11.4982	11.5141	11.5442	11.1295	11.6133	11.1739	11.2481	10.897	11.4485	11.3753	11.1662	11.8546	11.3547	10.9075	11.3775	11.4598	11.2286	11.3321	-0.231261	-0.127738	0.103524	0.10832	0.491387	0.586238	0.965293	0.308577	0.231926	5	5	5
Gabarapl1	Gamma-aminobutyric acid receptor-associated protein-like 1	8.06541		8.02596	8.16614	8.26296		8.95684	8.14699	8.66308	8.2358	7.8342	8.17814	7.98962	8.36613	8.82858	8.13012	8.50068	8.23933	0.370561	0.109217	-0.261344	0.108386	0.603469	0.342129	0.965026	0.219345	0.46581	4	4	5
Stard10	START domain-containing protein 10	7.15169	7.93844	6.99307	6.73833	6.69049	7.21574	6.48022	6.37029	6.19529	6.6737	6.91101	7.21219	6.76663	6.73639	7.03413	7.1024	6.58705	6.93207	-0.515357	-0.170335	0.345022	0.108701	0.501357	0.116655	0.963766	0.299853	0.933096	5	5	5
Rps13	Small ribosomal subunit protein uS15	9.82825	10.1887	9.95079	10.1097	9.94158	9.75755	9.90487	10.0621	9.72427	9.75282	9.96004	9.99086	9.87783	10.3085	10.5483	10.0038	9.84033	10.1371	-0.163481	0.133309	0.29679	0.10888	0.374229	0.069027	0.963051	0.426863	1.16098	5	5	5
Srsf10	Serine/arginine-rich splicing factor 10	7.30352		7.60348	7.16649	7.45026	7.51763			8.27865	7.66058	7.70861	8.32002	7.29778	7.50321	8.01977	7.38094	7.81895	7.76988	0.438015	0.388941	-0.0490745	0.108996	0.123751	0.874041	0.962588	0.90745	0.058468	4	3	5
Extl1	Exostosin-like 1	6.59826		6.50385	6.45634	6.54974	5.79255	6.17881	5.85435	6.62321	6.46687	6.77959	6.65162	6.74703	6.78538	7.45808	6.52705	6.18316	6.88434	-0.343892	0.357292	0.701184	0.109046	0.0697534	0.0125348	0.962389	1.15643	1.90188	4	5	5
Tecr	Very-long-chain enoyl-CoA reductase	10.9995	11.1375	10.6854	10.6205	10.6016	11.0059	11.6119	10.9281	11.0366	10.969	10.9894	10.9356	11.4201	11.2971	11.5689	10.8089	11.1103	11.2422	0.301408	0.433314	0.131906	0.109111	0.0295448	0.475331	0.962132	1.52952	0.323004	5	5	5
Fam8a1	Family with sequence similarity 8, member A1	5.59729		4.62958	4.85586	4.02438	5.50426	6.50985	5.47658	4.90583	5.29282	5.6782	5.8044	6.06703	6.49537	6.50794	4.77678	5.53787	6.11059	0.76109	1.33381	0.572719	0.109166	0.00619852	0.107539	0.961912	2.20771	0.968433	4	5	5
Gosr1	Golgi SNAP receptor complex member 1	10.2598	9.86736	8.92701	8.65735	8.82644	9.03961	8.58442	8.31274	8.88264	8.64044	9.15178	9.68575	9.9817	10.0531	10.0599	9.30759	8.69197	9.78645	-0.615622	0.478857	1.09448	0.109232	0.222081	0.000901825	0.961651	0.653488	3.04488	5	5	5
Pdk2	[Pyruvate dehydrogenase (acetyl-transferring)] kinase isozyme 2, mitochondrial	6.97618		7.63851	7.49528	7.78783	7.52279	7.98533	7.78871	8.14553	7.73494	8.02079	7.91852	7.78984	7.35599	7.77335	7.47445	7.83546	7.7717	0.361012	0.297251	-0.0637618	0.109238	0.183355	0.69307	0.961626	0.736707	0.159223	4	5	5
Ppp6c	Serine/threonine-protein phosphatase 6 catalytic subunit	7.4399		7.23289	7.14933	7.003	7.57831	7.10628	7.34216	7.70505	7.76671	7.72321	7.84934	7.48336	7.71221	7.96464	7.20628	7.4997	7.74655	0.293418	0.540271	0.246853	0.109645	0.00296051	0.130136	0.960012	2.52863	0.885603	4	5	5
Trpc6;Trpc7	Short transient receptor potential channel 6;Short transient receptor potential channel 7	6.22462		5.51517	6.22018	5.69087	5.83683	4.99177	5.8758	4.28754	5.18539	5.23245	4.1625	4.89339	4.22974		5.91271	5.23547	4.62952	-0.677241	-1.28319	-0.60595	0.109999	0.00679704	0.177651	0.958612	2.16768	0.750433	4	5	4
Lrp1	Prolow-density lipoprotein receptor-related protein 1	12.4189	12.6242	12.1773	12.3432	12.2536	12.0689	12.0881	12.2897	12.3011	12.2459	12.2095	12.0028	12.2035	12.567	12.763	12.3634	12.1988	12.3492	-0.164694	-0.0142634	0.15043	0.11031	0.930168	0.33466	0.957384	0.0314386	0.475396	5	5	5
Gpx4	Phospholipid hydroperoxide glutathione peroxidase	9.85089	9.95813	9.60467	9.59383	9.57287	9.98429	9.84212	9.65413	10.0097	10.0555	9.88411	9.96946	9.78601	10.1057	10.2601	9.71608	9.90914	10.0011	0.193063	0.284998	0.0919349	0.110368	0.0379631	0.430865	0.957159	1.42064	0.365659	5	5	5
Thop1	Thimet oligopeptidase	7.2536		7.41015	7.53352	7.63696	7.66573	8.00456	7.62671	7.53717	7.55805	7.22599	7.41642	7.26907	7.04469	7.83691	7.45856	7.67844	7.35862	0.219885	-0.0999423	-0.319827	0.110507	0.570213	0.0777008	0.956609	0.243963	1.10957	4	5	5
Stxbp1	Syntaxin-binding protein 1	14.1415	14.2421	14.2723	14.1643	14.1527	13.7006	13.9803	13.8824	14.3618	14.0448	13.7951	14.3086	14.1696	14.5413	14.4351	14.1946	13.994	14.2499	-0.200624	0.0553497	0.255974	0.110707	0.68655	0.168754	0.955826	0.163328	0.772746	5	5	5
Glmn	Glomulin	5.27264		5.05399	5.16253	4.79799	4.87545	5.84857	5.18989	5.89751	6.11621	4.69672	5.88435	4.94944	5.61047	5.98432	5.07179	5.58553	5.42506	0.513738	0.35327	-0.160468	0.110766	0.283454	0.657099	0.955594	0.547517	0.182369	4	5	5
Rasd2	GTP-binding protein Rhes	6.75436		7.29597	7.08669		7.44143			7.88401	7.27821	7.27607	7.87875	7.72807	7.60379	8.0427	7.04567	7.53455	7.70588	0.488878	0.660204	0.171326	0.111358	0.0193346	0.462158	0.95328	1.71367	0.335209	3	3	5
Anxa2	Annexin A2	11.2461	12.0417	11.2176	10.7141	11.2359	10.7967	11.5	10.3556	10.7256	10.4636	10.6559	10.6297	10.515	10.8775	11.3439	11.2911	10.7683	10.8044	-0.522821	-0.486692	0.0361289	0.111406	0.0968254	0.887954	0.953093	1.01401	0.0516095	5	5	5
Cdc16	Cell division cycle protein 16 homolog	6.98693		7.10129	7.00894	7.52546	7.64917	8.07926	7.22699	7.37011	7.33134	7.48345	7.72373	7.50725	6.74701	7.18608	7.15565	7.53137	7.3295	0.375719	0.17385	-0.201869	0.111458	0.457437	0.402556	0.952889	0.339669	0.395173	4	5	5
Neu3	Sialidase-3	6.00271		6.12778	6.2802	7.11773	7.31873		6.87355	6.52944	7.05259	6.63629	7.23548	6.73179	6.69579	7.22644	6.38211	6.94358	6.90516	0.561472	0.523055	-0.0384168	0.111654	0.0921019	0.860188	0.952127	1.03573	0.0654065	4	4	5
Rpl8	Large ribosomal subunit protein uL2	9.4765	8.8827	9.65946	9.33867	9.49695	9.54682	9.45313	9.61794	10.0459	9.67755	9.64847	9.91211	9.4677	9.32054	9.58767	9.37086	9.66826	9.5873	0.297407	0.216441	-0.0809659	0.11229	0.225948	0.583137	0.949659	0.645991	0.23423	5	5	5
Cdh6	Cadherin-6	6.30316	7.59685	6.27202	6.59758	6.53318	6.23319	5.88181	6.53334	6.13127	6.17026	6.21214	6.51787	6.41533	6.59938	6.58851	6.66056	6.18997	6.46664	-0.470584	-0.193913	0.27667	0.112537	0.465055	0.0605193	0.948704	0.332496	1.21811	5	5	5
Aldh1a1	Aldehyde dehydrogenase 1A1	7.58103	8.33289	7.39646	7.30299	7.52265	7.95596	8.38992	7.8692	8.1553	7.70686	7.21008	7.24946	6.97511	7.36852	7.61389	7.6272	8.01545	7.28341	0.388244	-0.34379	-0.732034	0.112608	0.141313	0.0016681	0.948429	0.849818	2.77778	5	5	5
Snx10	Sorting nexin-10	7.1183	7.61941	6.85287	6.42306	6.27701	6.80984	5.94369	6.39361	6.13006	6.48004	7.10016	7.13425	6.81131	6.8092	7.02269	6.85813	6.35145	6.97552	-0.50668	0.117394	0.624074	0.112708	0.653964	0.00528579	0.948047	0.184446	2.27689	5	5	5
Slc6a2	Sodium-dependent noradrenaline transporter	7.75727		8.13002	8.25019	7.91636	7.85435	8.47097	8.26856	8.5621	8.49799	7.80698	8.36493	8.20937	8.44793	8.05624	8.01346	8.33079	8.17709	0.317334	0.16363	-0.153704	0.112751	0.344835	0.398202	0.947878	0.462389	0.399896	4	5	5
Ogdh	2-oxoglutarate dehydrogenase complex component E1	9.47493	10.4014	9.41145	8.9537	9.4303	9.78706	10.0406	10.0897	9.91742	9.99362	9.32769	9.71985	9.3231	9.1092	9.20101	9.53435	9.96569	9.33617	0.431345	-0.198178	-0.629524	0.112934	0.465167	0.000657173	0.947176	0.332391	3.18232	5	5	5
Lrrc8b	Volume-regulated anion channel subunit LRRC8B	7.93583	9.20151	7.53439	7.84459	7.97858	7.54094	7.68647	7.54318	7.64934	7.50836	7.80321	7.75965	7.78037	8.25583	8.53851	8.09898	7.58566	8.02751	-0.513318	-0.0714645	0.441854	0.113033	0.832398	0.0254788	0.946793	0.0796688	1.59382	5	5	5
Tpm2	Tropomyosin beta chain			6.53241	6.13777	5.99816		7.66514	6.56723	8.84182	6.70268	6.19791	6.52933	6.64557	6.68215	7.13246	6.22278	7.44422	6.63748	1.22144	0.414706	-0.806732	0.113158	0.124082	0.145424	0.946314	0.906293	0.837365	3	4	5
Tgfbr1	TGF-beta receptor type-1	8.51773	8.51694	8.22662	8.59299	8.7835	8.66755	8.48896	8.13265	7.75058	7.51743	8.73728	7.45929	7.9772	7.53636		8.52756	8.11143	7.92753	-0.416121	-0.600023	-0.183902	0.113348	0.0667651	0.620867	0.945587	1.17545	0.207001	5	5	4
Zdhhc20	Palmitoyltransferase ZDHHC20	7.16025		7.28414	7.46447	6.83408	6.89184		6.27983		6.98749	7.12138	7.24512	6.93555	7.63635	7.66809	7.18573	6.71972	7.3213	-0.466013	0.135564	0.601577	0.113359	0.520807	0.0535534	0.945542	0.283323	1.27121	4	3	5
Kcnc2	Potassium voltage-gated channel subfamily C member 2	7.9258	8.21099	7.81228	8.32795	7.57982	8.11148	8.38659	8.05757	8.28711	8.34605	8.68731	9.06731	9.47181	9.5421	9.36839	7.97137	8.23776	9.22738	0.266392	1.25602	0.989625	0.113648	0.000305015	0.000401622	0.94444	3.51568	3.39618	5	5	5
Gabbr1	Gamma-aminobutyric acid type B receptor subunit 1	9.47881	9.52751	9.35266	9.57446	9.53032	9.4224	9.77338	9.64192	9.6601	9.57826	9.7829	9.49753	9.78877	10.0744	9.99872	9.49275	9.61521	9.82845	0.12246	0.335703	0.213242	0.114146	0.0142566	0.103198	0.942539	1.84598	0.98633	5	5	5
H2ac20;Hist2h2aa2	Histone H2A type 2-C;Histone H2A type 2-A	9.90494	9.48365	10.0396	9.60523	10.3014	9.8854	10.539	10.4441	12.4908	10.2305	10.5256	10.5384	10.5433	10.1475	10.4614	9.86698	10.718	10.4432	0.850979	0.57625	-0.274729	0.114455	0.00834796	0.569631	0.941365	2.07842	0.244407	5	5	5
Tardbp	TAR DNA-binding protein 43	8.53338	9.5883	8.57246	8.25004	9.0006	8.09438	8.9704	8.01721	8.19957	8.06985	8.07372	8.36137	7.92781	8.19895	8.2596	8.78896	8.27028	8.16429	-0.518671	-0.624666	-0.105994	0.114624	0.0341434	0.597527	0.940724	1.46669	0.223643	5	5	5
Khdrbs1	KH domain-containing, RNA-binding, signal transduction-associated protein 1	8.05942	9.05323	7.83791	7.23755	7.74156	7.30579	7.5792	7.03791	7.72613	7.44067	7.1421	8.01759	6.79778	7.57492	7.86805	7.98593	7.41794	7.48009	-0.567993	-0.505847	0.0621466	0.115077	0.214439	0.81402	0.939013	0.668696	0.089365	5	5	5
Decr1	2,4-dienoyl-CoA reductase [(3E)-enoyl-CoA-producing], mitochondrial	6.73106		7.01293	6.00236	7.29734	7.38675	7.32515	7.71317	7.27715	6.77897	6.61552	7.19202	6.67202	6.35569	6.73582	6.76092	7.29624	6.71421	0.535317	-0.0467079	-0.582025	0.115162	0.876038	0.020667	0.93869	0.0574771	1.68472	4	5	5
Slc12a7	Solute carrier family 12 member 7	10.0654	10.2039	10.121	9.74358	9.96849	9.14079	10.2875	8.83012	9.73788	9.74508	9.46942	10.4284	10.2129	10.8696	11.6722	10.0205	9.54828	10.5305	-0.472187	0.510038	0.982225	0.115201	0.208548	0.0582827	0.938542	0.680795	1.23446	5	5	5
Ncdn	Neurochondrin	11.1394	10.7038	10.7822	10.5318	11.1296	10.5166	10.9687	10.1634	10.4643	10.6123	10.5258	10.8935	10.6135	10.2922	10.6719	10.8574	10.5451	10.5994	-0.312302	-0.257984	0.054318	0.115492	0.134642	0.746902	0.937447	0.87082	0.126736	5	5	5
Fam98b	Protein FAM98B	8.09461	9.516	8.02158	7.73605	8.01548	7.66627	7.69598	7.724	7.75345	7.75297	7.55183	8.09925	7.68587	7.45765	7.56754	8.27674	7.71853	7.67243	-0.558211	-0.604315	-0.0461033	0.11555	0.109178	0.696385	0.937228	0.961866	0.157151	5	5	5
Fam162a	Protein FAM162A			7.73012	8.63936	8.18296	8.64541	8.10125	9.22468	8.94803	8.92268	8.28638	8.14672	7.70052	7.72345		8.18415	8.76841	7.96427	0.584262	-0.219884	-0.804145	0.115836	0.469698	0.015297	0.936157	0.328181	1.81539	3	5	4
Vamp2	Vesicle-associated membrane protein 2	10.4995	10.9789	10.7858	10.8196	11.0643	10.8242	10.5576	10.7922	10.4132	10.3712	10.2396	10.1443	10.0625	10.6949	10.2536	10.8296	10.5917	10.279	-0.237935	-0.550639	-0.312705	0.115894	0.00552905	0.0620091	0.935938	2.25735	1.20754	5	5	5
Gulp1	PTB domain-containing engulfment adapter protein 1	6.40897		6.34436	5.96028	6.5477	6.16903		6.00871		5.67854	6.29081	6.25177	6.14504	5.98288		6.31533	5.95209	6.16762	-0.363233	-0.147701	0.215532	0.116538	0.34255	0.19917	0.933532	0.465276	0.700777	4	3	4
Pip4k2b	Phosphatidylinositol 5-phosphate 4-kinase type-2 beta	12.8694	13.573	12.8438	12.6296	12.9523	12.5884	12.6538	12.6781	12.7444	12.7751	12.6941	12.73	12.4522	12.3403	12.4879	12.9736	12.6879	12.5409	-0.285713	-0.432737	-0.147024	0.116648	0.0389599	0.108036	0.933122	1.40938	0.96643	5	5	5
Ap2m1	AP-2 complex subunit mu	10.6751	11.2089	10.8976	10.4041	10.726	10.8343	11.2783	10.9395	11.1111	11.0962	10.5966	11.1908	10.7285	10.9428	11.0222	10.7823	11.0519	10.8962	0.269524	0.113841	-0.155683	0.116666	0.521144	0.266327	0.933057	0.283043	0.574584	5	5	5
Enpp5	Ectonucleotide pyrophosphatase/phosphodiesterase family member 5	6.32579		6.45029	6.4551	6.57397	6.69655	7.00428	6.20628	6.95581	6.96022	6.72717	6.95214	7.0345	7.22911	7.21813	6.45129	6.76463	7.03221	0.313338	0.580919	0.267581	0.117467	0.00143506	0.167489	0.930085	2.84313	0.776015	4	5	5
Trappc6b	Trafficking protein particle complex subunit 6B	7.92438	8.52237	7.91933	7.65791	7.93673	8.03922	7.83215	7.41784	7.53849	7.52886	7.88275	7.97214	7.70497	7.43633	7.53981	7.99215	7.67131	7.7072	-0.320832	-0.284945	0.0358872	0.117532	0.140907	0.819998	0.929844	0.851069	0.086187	5	5	5
Tpcn1	Two pore calcium channel protein 1	8.14253	9.79597	7.82239	8.06894	7.98765	7.97664	7.92075	7.60241	7.55286	7.46681	7.63698	7.84698	7.80718	8.34501	8.52485	8.36349	7.70389	8.0322	-0.6596	-0.331296	0.328304	0.117738	0.431777	0.137687	0.929085	0.364741	0.861108	5	5	5
Extl3	Exostosin-like 3	8.79862	9.49987	8.5996	8.36899	8.81916	8.2893	8.4934	8.31804	8.81512	8.29397	8.42201	8.67023	8.67526	8.88084	9.25747	8.81725	8.44196	8.78116	-0.375284	-0.0360859	0.339198	0.117776	0.881732	0.0840918	0.928944	0.0546633	1.07525	5	5	5
Cct4	T-complex protein 1 subunit delta	8.64356	9.39839	8.62964	8.66717	8.8394	9.0908	9.26104	9.16505	9.03941	8.97116	8.47101	8.70657	8.34297	8.25462	8.51115	8.83563	9.10549	8.45726	0.26986	-0.378365	-0.648226	0.117968	0.0508968	0.000108647	0.928238	1.29331	3.96398	5	5	5
Trappc14	Trafficking protein particle complex subunit 14	7.81792	8.57358	7.19492	6.96411	7.46273	7.20834	7.43904	6.6704	7.06404	6.91934	7.08503	7.54106	7.0343	7.00873	7.455	7.60265	7.06023	7.22483	-0.542419	-0.377827	0.164592	0.118106	0.247913	0.36705	0.927729	0.605701	0.435275	5	5	5
Cab39	Calcium-binding protein 39	7.41333	7.23843	7.29688	7.20465	7.42129	7.40796	7.59455	7.23656	7.58795	7.44359	7.48059	7.9625	7.63266	7.38409	7.71297	7.31492	7.45412	7.63456	0.139202	0.319644	0.180442	0.118228	0.0192574	0.170638	0.927278	1.7154	0.767923	5	5	5
Abhd16a	Phosphatidylserine lipase ABHD16A	10.1665	10.6592	10.2833	9.92481	10.05	10.2245	10.5275	10.5115	10.5356	10.499	10.2111	10.4281	10.7547	10.981	11.2912	10.2168	10.4596	10.7332	0.242867	0.516458	0.273591	0.118407	0.0546591	0.210804	0.926621	1.26234	0.676121	5	5	5
Myo5a	Unconventional myosin-Va	11.4252	12.0196	11.4153	11.1497	11.3707	11.2257	11.1773	11.1276	11.3135	11.2411	11.7449	11.7097	11.7169	11.7058	11.9978	11.4761	11.217	11.775	-0.259086	0.298894	0.55798	0.118413	0.0904566	2.4019e-05	0.926601	1.04356	4.61944	5	5	5
Marcks	Myristoylated alanine-rich C-kinase substrate	8.87302	9.76272	9.52767	10.0727	9.08669	10.2027	9.71087	9.46275	10.0424	10.2023	9.29779	9.3585	9.25468	9.3081	9.36075	9.46456	9.9242	9.31596	0.459638	-0.148597	-0.608235	0.118579	0.517467	0.00333086	0.925992	0.286118	2.47744	5	5	5
Spr	Sepiapterin reductase	9.48107	10.0001	9.22505	8.65303	8.89645	9.09179	8.82222	8.37927	8.74684	8.9219	8.78436	9.22302	8.68085	8.27281	8.83897	9.25114	8.7924	8.76	-0.458739	-0.491143	-0.0324044	0.118667	0.11699	0.870822	0.92567	0.931852	0.0600708	5	5	5
Smarca5	SWI/SNF-related matrix-associated actin-dependent regulator of chromatin subfamily A member 5	9.80211	10.9353	9.36941	9.21671	9.6157	9.38491	9.46129	9.09313	9.16298	9.09929	9.31044	9.36964	9.20229	8.91558	9.09603	9.78784	9.24032	9.1788	-0.547519	-0.609042	-0.0615226	0.118813	0.0888138	0.595495	0.925134	1.05152	0.225122	5	5	5
Fgfr1	Fibroblast growth factor receptor 1	6.39209		6.4953	6.12195	5.63069	6.87989	5.6945	7.02003	7.75848	7.16199	6.88154	6.67999	6.60805	7.00576	7.34352	6.16001	6.90298	6.90377	0.742972	0.743765	0.000793533	0.118942	0.0131028	0.998303	0.924665	1.88264	0.000737676	4	5	5
Ankfy1	Rabankyrin-5	8.24831	9.43669	8.18617	7.91156	8.44728	8.0531	8.1609	7.84108	7.806	8.00912	7.8759	8.49193	8.00467	7.76684	7.68612	8.446	7.97404	7.96509	-0.471962	-0.480908	-0.00894607	0.119024	0.145417	0.955937	0.924366	0.837386	0.0195708	5	5	5
Gmppb	Mannose-1-phosphate guanyltransferase beta	6.3419	6.9658	6.40196	6.46421	6.48248	6.09876	6.39926	6.37077	6.2794	6.41147	6.58701	6.91036	6.81637	6.3246	6.591	6.53127	6.31193	6.64587	-0.219338	0.114597	0.333934	0.119031	0.470128	0.0217607	0.924341	0.327784	1.66233	5	5	5
Stx1a	Syntaxin-1A	11.4684	11.845	11.9104	12.0606	11.9165	11.2737	11.627	11.5159	11.8963	11.6515	11.6859	11.8384	12.1131	12.2905	11.9855	11.8402	11.5929	11.9827	-0.247305	0.142457	0.389762	0.119272	0.353414	0.0282071	0.923462	0.451716	1.54964	5	5	5
Hmox2	Heme oxygenase 2	7.69807		7.29588	7.14256	7.31294	7.662	7.48634	7.42016	7.94232	7.59516	7.50241	7.97627	7.60748	8.18927	8.62664	7.36236	7.6212	7.98041	0.258834	0.618051	0.359217	0.119707	0.0446494	0.145578	0.92188	1.35018	0.836903	4	5	5
Aldh3a2	Aldehyde dehydrogenase family 3 member A2	9.89615	10.3824	9.80703	9.4988	9.67593	9.93783	10.0447	10.2258	10.2721	10.1791	9.77376	10.0102	10.0886	10.6248	10.8536	9.85206	10.1319	10.2702	0.279851	0.418131	0.13828	0.119943	0.133523	0.530341	0.921024	0.874443	0.275445	5	5	5
Pip4k2c	Phosphatidylinositol 5-phosphate 4-kinase type-2 gamma	9.72104	10.5137	10.0643	10.0426	10.2028	9.3889	10.0121	9.92796	9.87988	9.86867	9.59239	10.1322	9.8252	9.65958	9.8671	10.1089	9.81551	9.81529	-0.293386	-0.293608	-0.000221998	0.120366	0.102294	0.998812	0.919496	0.99015	0.000516458	5	5	5
Cd44	CD44 antigen	8.22386	7.9582	8.64156	8.33814	8.34873	8.90583	8.24989	8.79398	8.76819	8.30938	8.40765	7.75237	7.82139	8.63764	8.59461	8.3021	8.60545	8.24273	0.303355	-0.0593696	-0.362724	0.120443	0.794102	0.15907	0.919217	0.100124	0.798413	5	5	5
Abraxas2	BRISC complex subunit Abraxas 2	8.00293	9.08748	7.92288	7.75476	8.12888	7.99106	7.51103	7.21895	7.75637	8.0014	7.98609	8.35718	7.87342	7.84107	8.11944	8.17939	7.69576	8.03544	-0.483622	-0.143947	0.339675	0.120573	0.585184	0.0904341	0.918751	0.232708	1.04367	5	5	5
Cxadr	Coxsackievirus and adenovirus receptor homolog	8.64837	9.56802	8.75593	8.57285	8.6719	8.67934	8.42505	8.54824	8.3326	8.55723	8.76311	8.50032	8.85026	8.60161	8.58197	8.84342	8.50849	8.65946	-0.334925	-0.183961	0.150964	0.120771	0.371504	0.122486	0.918036	0.430036	0.911912	5	5	5
Vps53	Vacuolar protein sorting-associated protein 53 homolog	9.61943	10.5623	9.20827	8.99948	9.71767	9.38886	9.40463	8.95529	8.88865	8.92083	8.89945	8.82208	8.72583	8.43003	8.25174	9.62143	9.11165	8.62583	-0.509779	-0.995603	-0.485824	0.120837	0.00989908	0.0209766	0.917799	2.00441	1.67826	5	5	5
Homer1	Homer protein homolog 1	6.31837		6.67738	7.06802	6.45781	6.90641	6.41871	7.30881	7.47835	7.3578	6.75965	7.30925	7.1683	7.02602	7.07974	6.6304	7.09401	7.06859	0.463619	0.438196	-0.0254226	0.121241	0.0422827	0.908562	0.916349	1.37384	0.0416453	4	5	5
Trappc2	Trafficking protein particle complex subunit 2	7.37984		7.76639	7.66042	8.06235	7.68035	7.41103	7.24855	7.6043	7.1888	7.61432	7.0823	7.44901	7.02243	7.28273	7.71725	7.42661	7.29016	-0.290646	-0.427092	-0.136447	0.121369	0.0459794	0.379156	0.915891	1.33744	0.421182	4	5	5
Inpp5a	Inositol polyphosphate-5-phosphatase A	8.83646	9.49387	9.0753	8.93358	9.09784	9.47601	9.55532	9.31191	9.27082	9.05411	9.02329	8.96194	8.89276	9.0944	9.29794	9.08741	9.33363	9.05407	0.246222	-0.0333448	-0.279567	0.121464	0.806986	0.0364866	0.915552	0.0931339	1.43787	5	5	5
Pla2g6	85/88 kDa calcium-independent phospholipase A2	7.15297	8.59056	6.8999	6.085	7.11179			6.06113		5.73376	4.91665	5.87866	5.29717	6.83452	6.20985	7.16804	5.89745	5.82737	-1.2706	-1.34068	-0.0700774	0.12163	0.0343865	0.907074	0.914959	1.46361	0.0423574	5	2	5
Try10	Trypsin 10	9.37535	9.82333	8.85593	8.12086	9.14049	9.27619	10.5355	9.42177	10.1494	9.26006	9.06368	9.0002	9.31774	9.335	10.5494	9.06319	9.72857	9.45321	0.665383	0.390018	-0.275365	0.121885	0.358319	0.492883	0.91405	0.44573	0.307256	5	5	5
Fau	Ubiquitin-like FUBI-ribosomal protein eS30 fusion protein	10.5624	10.2201	10.7663	10.2948	10.3877	10.4786	10.2679	11.038	11.336	11.0098	10.3349	11.2215	9.68297	10.812	11.1287	10.4462	10.8261	10.636	0.379842	0.189775	-0.190067	0.121921	0.545634	0.597184	0.913922	0.263098	0.223892	5	5	5
Bckdhb	2-oxoisovalerate dehydrogenase subunit beta, mitochondrial	7.98262		7.32971	6.91328	7.08032	8.38364	7.30236	7.4361	8.05446	8.36921	7.86863	8.41656	7.98903	8.15993	7.47396	7.32648	7.90915	7.98162	0.582669	0.655136	0.072467	0.122428	0.0470509	0.800659	0.91212	1.32743	0.0965524	4	5	5
Sucla2	Succinate--CoA ligase [ADP-forming] subunit beta, mitochondrial	8.91565	9.70749	8.82187	8.88246	8.95278	9.34405	9.58933	9.53912	9.0923	9.32579	8.85946	8.8929	8.43883	8.15322	7.97776	9.05605	9.37812	8.46443	0.322069	-0.591616	-0.913685	0.122504	0.0430709	0.00204281	0.911849	1.36582	2.68977	5	5	5
Cacng2	Voltage-dependent calcium channel gamma-2 subunit	9.2718	10.9462	9.1557	9.14287	9.70555	9.87519	10.8244	10.5374	10.1987	10.0742	10.0417					9.64442	10.302	10.0417	0.657546	0.397253	-0.260293	0.122507	#DIV/0!	#DIV/0!	0.911838	#DIV/0!	#DIV/0!	5	5	1
Lonp2	Lon protease homolog 2, peroxisomal	6.19084			5.94681				5.88485	5.26596	5.37663	5.75993	6.18787	6.50008	6.7412	7.2365	6.06882	5.50915	6.48512	-0.559674	0.416297	0.975971	0.12255	0.369606	0.0352524	0.911686	0.432261	1.45281	2	3	5
Psmd8	26S proteasome non-ATPase regulatory subunit 8	8.6468	8.45255	8.728	8.21848	8.69961	8.43708	8.52446	8.07935	8.39214	8.24638	8.4487	8.93446	8.7039	8.02547	8.52859	8.54909	8.33588	8.52822	-0.213207	-0.0208668	0.19234	0.122858	0.90986	0.290563	0.910598	0.0410253	0.53676	5	5	5
Caly	Neuron-specific vesicular protein calcyon	6.20822		6.36513	6.66318	6.5722	6.05075	6.95079	7.03617	7.40217	7.41214	6.79394	6.76852	6.61952	7.22038	7.69494	6.45219	6.9704	7.01946	0.518218	0.567275	0.0490578	0.122897	0.0501152	0.880631	0.910459	1.30003	0.0552062	4	5	5
B3gat3	Galactosylgalactosylxylosylprotein 3-beta-glucuronosyltransferase 3	9.94653	10.4457	9.53614	9.29364	9.58306	9.2705	9.5726	9.21181	9.65389	9.17043	9.26467	9.53928	9.3729	9.87067	10.0979	9.76102	9.37584	9.62909	-0.385173	-0.13193	0.253243	0.123288	0.617301	0.207148	0.90908	0.209503	0.683719	5	5	5
S100a11	Protein S100-A11	6.39754		6.49497	5.83336	6.89115	6.74488	7.18928	6.91195	7.46234	6.29787	4.86354	6.42127	5.6555		6.64388	6.40426	6.92126	5.89605	0.517008	-0.508211	-1.02522	0.123358	0.310792	0.044678	0.908834	0.50753	1.34991	4	5	4
Pdhb	Pyruvate dehydrogenase E1 component subunit beta, mitochondrial	7.71653	9.26628	7.29229	7.03886	7.657	8.4353	8.76401	9.12946	8.12601	8.21689	7.47134	7.3387	7.06878	7.22942	7.01881	7.79419	8.53434	7.22541	0.740142	-0.568786	-1.30893	0.123533	0.190005	0.000199239	0.908216	0.721235	3.70063	5	5	5
Golim4	Golgi integral membrane protein 4	7.42727		7.44247	6.87272	7.03786	6.68743	6.03809	6.74335	7.30164	6.89938	6.88391	7.45631	7.17854	7.50991	8.46171	7.19508	6.73398	7.49808	-0.461101	0.302997	0.764098	0.123581	0.38364	0.0520565	0.908047	0.416076	1.28352	4	5	5
Npr2	Atrial natriuretic peptide receptor 2	6.63669		6.76067	6.74032	6.93507	7.00933	7.39973	6.72867	7.11628	6.8373	6.47514	6.67544	6.51366	6.63943	7.34459	6.76819	7.01826	6.72965	0.250074	-0.0385347	-0.288609	0.123663	0.842981	0.180149	0.907761	0.0741821	0.744368	4	5	5
Pcdh17	Protocadherin 17	5.95574		5.16673	5.30751	7.48005	7.29031	7.67757	6.84012	6.52511	6.31144	6.11705		6.22927	6.03149		5.97751	6.92891	6.12594	0.951402	0.148429	-0.802974	0.123937	0.82263	0.0535492	0.906801	0.0847955	1.27125	4	5	3
Eif3a	Eukaryotic translation initiation factor 3 subunit A	8.84176	9.36513	8.65588	8.34455	8.65778	8.63325	8.47871	8.31336	8.50731	8.41846	8.37898	8.73256	8.40379	8.01917	8.16746	8.77302	8.47022	8.34039	-0.302804	-0.432628	-0.129824	0.124099	0.0701951	0.353654	0.906231	1.15369	0.451422	5	5	5
Gemin5	Gem-associated protein 5	7.84284		7.50553	7.28327	7.60843	7.54677	7.2799	7.39749	7.18163	7.31594	7.55148	7.79701	7.53699	6.99876	6.90801	7.56002	7.34435	7.35845	-0.215672	-0.20157	0.0141025	0.124167	0.390836	0.94043	0.905992	0.408006	0.0266734	4	5	5
Igf2r	Cation-independent mannose-6-phosphate receptor	9.35832	10.1919	9.15352	9.2444	9.45826	9.07271	9.30316	9.1118	9.17356	9.12224	9.23849	9.22185	9.23331	9.29432	9.52642	9.48129	9.15669	9.30288	-0.324592	-0.178408	0.146184	0.124635	0.383778	0.0697173	0.90436	0.41592	1.15666	5	5	5
Glrb	Glycine receptor subunit beta	7.64486		8.43162	8.48523	9.12229	8.85385	8.86022	9.00977	9.00966	8.7425	8.48195	8.93995	8.62218	8.8058	8.98511	8.421	8.8952	8.767	0.474197	0.345999	-0.128198	0.1248	0.266868	0.26966	0.903784	0.573704	0.569183	4	5	5
Brk1	Protein BRICK1	7.07665		7.85564	7.62419	7.8188	7.49037	8.42811	8.01068	8.08414	7.97804	7.43809	7.77637	7.36261	7.29279	7.37965	7.59382	7.99827	7.4499	0.404447	-0.143917	-0.548365	0.124983	0.461733	0.0129918	0.903148	0.335609	1.88633	4	5	5
Nrp1	Neuropilin-1	7.93059	8.37962	7.79575	7.90909	7.86999	7.87757	7.61751	7.88468	7.81055	7.70653	7.61694	7.08891	7.49947	7.50232	7.43646	7.97701	7.77937	7.42882	-0.197643	-0.548191	-0.350548	0.12515	0.00391795	0.00958207	0.902569	2.40694	2.01854	5	5	5
RO60	RNA-binding protein Ro60	5.74117		7.05066	7.10582	7.32743	7.18434	7.84877	7.12381	7.54984	7.36715	6.99122	7.33657	6.94267	6.93326	7.22527	6.80627	7.41478	7.0858	0.608512	0.279532	-0.32898	0.125378	0.424516	0.0668358	0.90178	0.372106	1.17499	4	5	5
St3gal4	CMP-N-acetylneuraminate-beta-galactosamide-alpha-2,3-sialyltransferase 4	6.81325		6.22802	5.55055	5.64967	5.90332	5.58994	5.33109	5.59375	5.4651	5.97125	5.27813	5.79622	5.57731	5.31606	6.06037	5.57664	5.5878	-0.483732	-0.472578	0.0111545	0.125568	0.157115	0.947556	0.901121	0.803781	0.0233952	4	5	5
Flii	Protein flightless-1 homolog	8.26927	8.51535	8.0379	7.74395	8.09918	8.15767	7.99342	7.75986	7.74743	7.66321	8.01037	7.46193	7.60916	7.18306	7.72694	8.13313	7.86432	7.59829	-0.26881	-0.534836	-0.266026	0.125577	0.0214425	0.145801	0.90109	1.66872	0.83624	5	5	5
Mtmr1	Myotubularin-related protein 1	8.62046	8.75705	8.44512	8.35545	8.52102	8.50128	8.23178	8.14538	8.53412	8.40655	8.42671	8.70589	8.30464	8.0655	8.23917	8.53982	8.36382	8.34838	-0.175999	-0.191437	-0.0154378	0.125643	0.171451	0.909025	0.900863	0.765861	0.0414244	5	5	5
Rufy2	RUN and FYVE domain-containing protein 2	8.56962	9.43929	8.33718	8.16729	8.17454	8.14031	8.04335	8.5823	7.55849	7.89194	8.42931	8.70218	8.19614	7.72998	7.84374	8.53758	8.04328	8.18027	-0.494306	-0.357314	0.136991	0.126594	0.264542	0.592579	0.897587	0.577506	0.227254	5	5	5
Rpl36a	Large ribosomal subunit protein eL42	9.42984	10.7962	9.42832	9.23102	9.70454	9.25842	9.25834	9.51134	8.98348	9.07005	9.18763	9.33906	9.2331	8.92236	8.79317	9.71798	9.21632	9.09506	-0.501659	-0.622918	-0.121259	0.12674	0.0699081	0.40128	0.897086	1.15547	0.396553	5	5	5
Braf	Serine/threonine-protein kinase B-raf	9.18247	9.78248	8.81581	8.6698	9.09444	8.97198	8.8944	8.6997	8.59379	8.63048	8.91923	8.9693	8.82634	8.56999	8.78327	9.109	8.75807	8.81363	-0.350929	-0.295374	0.0555558	0.126939	0.186039	0.599768	0.896406	0.730396	0.222017	5	5	5
Elavl4	ELAV-like protein 4	8.70687	10.4275	7.99493	8.00939	8.74993	8.30358	8.30695	8.0533	7.83506	7.28283	7.72663	7.87116	7.48648			8.77772	7.95634	7.69476	-0.82138	-1.08297	-0.261589	0.126954	0.11948	0.363586	0.896354	0.922704	0.439393	5	5	3
Pomgnt1	Protein O-linked-mannose beta-1,2-N-acetylglucosaminyltransferase 1	7.21725		7.28416	6.87171	7.21882	6.72355	7.32403	6.66706	6.95487	6.47017	6.65981	6.65218	6.89689	6.83274	7.10933	7.14798	6.82793	6.83019	-0.320049	-0.317794	0.00225503	0.127038	0.0399274	0.98967	0.896065	1.39873	0.00450944	4	5	5
Gsk3a	Glycogen synthase kinase-3 alpha	8.20743	9.49284	7.69104	7.2553	8.44283	7.55677	8.03291	7.43628	7.38096	7.25599	7.33458	7.6086	7.33631	6.90282	6.97357	8.21789	7.53258	7.23118	-0.685306	-0.986713	-0.301406	0.127043	0.0393442	0.145338	0.896048	1.40512	0.837622	5	5	5
Sidt1	SID1 transmembrane family member 1	10.0836	11.2919	9.4903	9.52158	9.78607	9.88146	9.53448	9.38972	9.03687	9.26577	9.47252	9.50458	9.55563	9.62074	9.81175	10.0347	9.42166	9.59304	-0.613036	-0.441656	0.171381	0.127628	0.226885	0.295969	0.894053	0.644195	0.528753	5	5	5
Ndufs2	NADH dehydrogenase [ubiquinone] iron-sulfur protein 2, mitochondrial	10.3099	10.7234	10.0568	9.42334	10.2668	10.2183	10.8677	10.9565	10.3074	10.6255	9.89294	10.499	10.1751	10.1072	10.101	10.156	10.5951	10.1551	0.439047	-0.000995225	-0.440042	0.127701	0.996714	0.0373616	0.893806	0.00142953	1.42757	5	5	5
Cse1l	Exportin-2	8.58866	9.63609	8.30155	8.25473	8.62484	8.72936	8.25506	7.95813	7.96313	8.04462	7.99168	8.53513	7.86443	7.58624	7.95692	8.68118	8.19006	7.98688	-0.491115	-0.694296	-0.203181	0.127741	0.0457417	0.365833	0.89367	1.33969	0.436717	5	5	5
Hapln1	Hyaluro and proteoglycan link protein 1	10.3508	10.8035	10.2665	10.5087	10.1119	10.2248	10.1835	10.2513	10.313	9.88908	10.5448	10.1077	10.3057	10.069	10.0574	10.4083	10.1723	10.2169	-0.235954	-0.191363	0.044592	0.128143	0.238889	0.717863	0.892304	0.621804	0.143958	5	5	5
Arih1	E3 ubiquitin-protein ligase ARIH1	8.12369	8.01598	7.77559	7.58906	8.30486	7.73716	7.7256	7.91643	7.70641	7.53253	7.7789	7.62928	7.59213	7.09738	7.28136	7.96183	7.72363	7.47581	-0.238209	-0.486026	-0.247816	0.128355	0.0255452	0.111557	0.891587	1.59269	0.952504	5	5	5
Actbl2	Beta-actin-like protein 2	13.8942	15.7721	12.915	12.7699	13.9467	13.1306	13.7643	12.7561	12.3954	12.0705	12.7871	11.9551	12.7621	11.9179	11.6443	13.8596	12.8234	12.2133	-1.03618	-1.64625	-0.610076	0.128657	0.0227685	0.144251	0.890567	1.64266	0.840881	5	5	5
Vps33b	Vacuolar protein sorting-associated protein 33B	7.91257	8.58031	7.57255	7.34938	7.5748	7.54181	7.41242	7.16367	7.43919	7.52175	7.56502	7.99915	7.47917	7.57532	8.15684	7.79792	7.41577	7.7551	-0.382155	-0.0428204	0.339334	0.128785	0.87042	0.0549613	0.890135	0.0602711	1.25994	5	5	5
Ndufv1	NADH dehydrogenase [ubiquinone] flavoprotein 1, mitochondrial	11.3451	11.4267	11.0851	10.4228	11.1933	11.0342	11.5866	11.8301	11.3365	11.5691	11.0251	11.3718	11.2798	11.0667	11.1297	11.0946	11.4713	11.1746	0.376693	0.0800222	-0.296671	0.12971	0.684335	0.0824117	0.887026	0.164731	1.08401	5	5	5
Kcnj3	G protein-activated inward rectifier potassium channel 1	9.855	10.1872	9.76168	10.0105	9.87177	9.36629	10.0224	9.7749	9.81585	9.57542	9.63821	9.85406	10.1302	10.2664	10.1229	9.93722	9.71098	10.0024	-0.226237	0.0651367	0.291374	0.12976	0.642553	0.103895	0.886859	0.192091	0.983405	5	5	5
Mtnd1	NADH-ubiquinone oxidoreductase chain 1	8.39735		7.93603	7.87677	8.41213	8.71538	10.5541	9.37602	8.21116	8.27531	8.41982	7.1043	8.58414	6.81942		8.15557	9.02639	7.73192	0.870817	-0.423649	-1.29447	0.130911	0.404231	0.0796294	0.883025	0.39337	1.09893	4	5	4
RTRAF	RNA transcription, translation and transport factor protein	6.14911		5.95563	5.78358	5.88152	6.22262	6.60473	5.81899	6.2943	6.13197	6.14948	6.54546	6.01476	5.69068	6.63037	5.94246	6.21452	6.20615	0.272064	0.26369	-0.00837404	0.131021	0.245266	0.969855	0.882661	0.610363	0.0132934	4	5	5
Dhx15	ATP-dependent RNA helicase DHX15	7.65559	9.35396	7.61406	7.11284	7.39568	7.33366	7.13739	6.88706	7.23931	7.16411	7.09413	7.70226	6.991	6.69692	7.38406	7.82643	7.15231	7.17367	-0.674121	-0.652753	0.0213677	0.131123	0.167233	0.911996	0.882323	0.776678	0.0400071	5	5	5
Kcnj13	Inward rectifier potassium channel 13	8.87578	9.58646	7.79358	7.7087	8.52915	8.29302	8.10142	7.13716	7.99294	7.54948	5.76582	7.36172	4.86993	7.13854	5.39406	8.49873	7.81481	6.10601	-0.683927	-2.39272	-1.70879	0.13173	0.00408135	0.0124137	0.880314	2.3892	1.9061	5	5	5
Mpp1	55 kDa erythrocyte membrane protein	7.40072		7.08581	7.23898	7.12312	7.26753	7.60702	7.18503	7.50053	7.40991	7.30848	7.44502	7.0381	7.09785	7.20581	7.21216	7.394	7.21905	0.181849	0.00689539	-0.174953	0.131831	0.948775	0.136371	0.879982	0.0228367	0.865277	4	5	5
Ndfip2	NEDD4 family-interacting protein 2 (Fragment)	6.41736	7.65121	6.50775	6.51668	6.42461	6.28406	6.25519	6.3305	6.34561	6.30403	6.61767	6.8371	7.22426	7.71269	7.6803	6.70352	6.30388	7.21441	-0.399643	0.510886	0.910528	0.132128	0.153095	0.00326955	0.879004	0.815038	2.48551	5	5	5
Csnk2b	Casein kinase II subunit beta	9.55612	9.71921	9.50116	9.65864	9.72698	9.71227	9.84548	9.73564	9.72638	9.62213	9.30712	9.17436	9.12073	9.21018	9.11996	9.63242	9.72838	9.18647	0.0959589	-0.445949	-0.541908	0.132182	4.91376e-05	4.4084e-06	0.878828	4.30859	5.35572	5	5	5
Wdr13	WD repeat-containing protein 13	5.90162		5.57516	5.65307		7.13722		6.42527	5.70513	6.17839	6.09501	6.47618	5.78191	5.74013	6.31579	5.70995	6.3615	6.08181	0.651554	0.371856	-0.279699	0.132468	0.120417	0.395766	0.87789	0.919314	0.402561	3	4	5
Pcbp1	Poly(rC)-binding protein 1	8.99765	9.19322	8.77893	8.90768	8.78201	9.19947	9.11361	9.02046	8.96345	9.09139	8.77987	8.85841	8.57794	8.46098	8.63787	8.9319	9.07768	8.66301	0.145778	-0.268887	-0.414666	0.13269	0.0333257	0.000950762	0.877162	1.47722	3.02193	5	5	5
Folr1	Folate receptor alpha	10.1813	9.35121	9.92568	9.71279	9.89436	9.70495	8.81395	8.71832	9.66421	9.84611	7.17989	9.17838	6.94339	9.33381	7.38684	9.81308	9.34951	8.00446	-0.463569	-1.80861	-1.34504	0.132858	0.00957547	0.0458697	0.876614	2.01884	1.33847	5	5	5
Ndufaf6	NADH dehydrogenase (ubiquinone) complex I, assembly factor 6	7.48894		7.40433	7.30682	7.40575	7.69219	7.37705	7.38667	8.21487	7.88895	8.11228	8.61691	8.51951	8.43351	8.43966	7.40146	7.71194	8.42437	0.310484	1.02291	0.712431	0.133047	2.04164e-05	0.00416133	0.875995	4.69002	2.38077	4	5	5
Ckmt1	Creatine kinase U-type, mitochondrial	9.43286	11.0624	9.27968	9.04017	9.61014	9.78735	10.4704	11.2335	10.3137	10.2007	9.57196	9.75676	9.56424	9.44241	9.72893	9.68506	10.4011	9.61286	0.716074	-0.0721979	-0.788272	0.133087	0.846692	0.0120155	0.875863	0.0722746	1.92026	5	5	5
Map4k3	Mitogen-activated protein kinase kinase kinase kinase 3	6.73231	8.58531	7.91513	7.89187	8.34669	7.1955	8.03568	7.1979	6.96129	6.9316	7.46029	7.68755	7.54889	6.91938	7.96536	7.89426	7.2644	7.51629	-0.629868	-0.377969	0.2519	0.133136	0.327251	0.36863	0.875704	0.485119	0.43341	5	5	5
Sorcs3	VPS10 domain-containing receptor SorCS3	8.46705	8.92504	8.16108	8.24384	8.44511	8.28113	8.44926	8.21589	7.98649	7.95908	8.04757	7.89553	8.05372	8.4616	8.57512	8.44842	8.17837	8.20671	-0.270053	-0.241714	0.0283386	0.133211	0.231875	0.864409	0.87546	0.634746	0.0632807	5	5	5
Hycc2	Hyccin 2	9.66373	10.877	9.42335	9.2228	9.88058	9.51098	9.15811	9.34533	9.31119	9.29577	9.35017	9.3831	9.24803	9.28403	9.52422	9.81348	9.32427	9.35791	-0.48921	-0.455576	0.0336338	0.134118	0.157296	0.661914	0.872512	0.803283	0.179198	5	5	5
Elp1	Elongator complex protein 1	9.5643	10.3872	9.10606	8.97569	9.4985	9.29086	9.11386	9.00933	9.04139	8.96273	9.24382	9.35788	9.09958	8.91894	9.15203	9.50634	9.08363	9.15445	-0.422708	-0.351887	0.0708205	0.134186	0.209369	0.469012	0.872294	0.679088	0.328816	5	5	5
Trappc12	Trafficking protein particle complex subunit 12	8.30119	10.0588	8.19552	8.13843	8.22185	8.13035	8.34487	7.635	7.9303	7.56396	8.22843	7.97478	7.81445	8.20637	7.94921	8.58316	7.9209	8.03465	-0.662268	-0.548515	0.113752	0.134708	0.185111	0.515547	0.870606	0.732568	0.287732	5	5	5
Bin1	Myc box-dependent-interacting protein 1	8.80015	9.11075	8.87513	9.94264	8.91509	9.43458	9.70555	9.29976	9.64471	9.41455	9.86818	9.45309	9.43725	9.6237	10.0862	9.12875	9.49983	9.69369	0.371077	0.564937	0.19386	0.134844	0.0495067	0.221672	0.870167	1.30534	0.654289	5	5	5
Dock4	Dedicator of cytokinesis protein 4	8.54428	9.8436	8.21629	8.30843	8.52199	8.21984	8.31127	8.10275	8.13761	8.1854	8.39814	8.43474	8.33164	8.32508	8.48449	8.68692	8.19137	8.39481	-0.495543	-0.292101	0.203442	0.134914	0.354747	0.00256462	0.869944	0.450081	2.59098	5	5	5
Slc7a11	Cystine/glutamate transporter	8.71031	10.2128	8.5777	8.77	8.77536	8.92896	8.49451	8.34545	8.36887	8.17831	8.55095	8.22146	8.35989	8.56801	8.8188	9.00923	8.46322	8.50382	-0.546011	-0.505408	0.040603	0.135033	0.152376	0.808939	0.869559	0.817084	0.0920843	5	5	5
Dlat	Dihydrolipoyllysine-residue acetyltransferase component of pyruvate dehydrogenase complex, mitochondrial	10.9738	11.6545	10.7991	10.6304	11.0163	11.318	11.1735	11.4529	11.2532	11.3765	10.7904	11.3669	10.8918	10.6965	10.9241	11.0148	11.3148	10.9339	0.300017	-0.0808758	-0.380893	0.135114	0.708533	0.0159435	0.8693	0.14964	1.79742	5	5	5
Dhx9	ATP-dependent RNA helicase A	8.32499	10.4267	8.17837	7.74047	8.40732	7.95515	7.8555	7.67026	7.88806	7.81666	7.96853	8.46023	8.19912	7.56163	7.59835	8.61557	7.83713	7.95757	-0.77844	-0.657993	0.120447	0.135952	0.22302	0.520374	0.866614	0.651657	0.283684	5	5	5
Mtch1	Mitochondrial carrier homolog 1	8.21206	9.29947	7.6086	7.11891	7.98719	8.34226	9.05419	8.8825	8.53339	8.59703	8.00609	8.23165	8.15939	8.24787	8.37018	8.04525	8.68187	8.20304	0.636627	0.157792	-0.478834	0.137501	0.680274	0.00925566	0.861694	0.167316	2.03359	5	5	5
Pdia3	Protein disulfide-isomerase A3	7.57175	8.80503	7.46167	7.30161	7.33795	7.9731	8.04377	8.45841	8.44756	8.03853	7.54259	7.47322	7.62709	8.12129	8.48394	7.6956	8.19227	7.84962	0.496672	0.154021	-0.34265	0.137702	0.664833	0.162356	0.86106	0.177287	0.789533	5	5	5
Kbtbd11	Kelch repeat and BTB domain-containing protein 11	9.1023	9.73669	8.73542	8.57048	9.11807	8.93291	8.87714	8.64592	8.51865	8.45851	8.82744	8.51472	8.63861	8.34488	8.66905	9.05259	8.68663	8.59894	-0.365966	-0.453652	-0.0876864	0.138028	0.0695142	0.500683	0.860033	1.15793	0.300437	5	5	5
Atp11a	Phospholipid-transporting ATPase IH	8.51839	8.64011	8.66542	8.80955	9.04659	8.65057	7.92222	8.31875	8.75486	8.59207	8.42872	8.50588	8.19512	8.51683	8.48706	8.73601	8.4477	8.42672	-0.288318	-0.309292	-0.0209735	0.138065	0.0213852	0.899794	0.859917	1.66989	0.0458569	5	5	5
Grin1	Glutamate receptor ionotropic, NMDA 1	11.1231	11.8782	10.8601	10.9308	11.2982	10.7555	11.101	11.0459	10.8927	10.6334	10.9217	10.8654	11.1018	11.1465	11.1696	11.2181	10.8857	11.041	-0.332379	-0.177087	0.155292	0.138178	0.383666	0.184819	0.859562	0.416046	0.733255	5	5	5
Hsdl1	Inactive hydroxysteroid dehydrogenase-like protein 1	8.31396	9.40682	7.90798	7.44894	8.14937	8.57739	9.24687	9.22248	8.43134	8.75537	8.19435	8.52224	8.3927	8.49998	8.11141	8.24542	8.84669	8.34414	0.601275	0.0987207	-0.502554	0.138187	0.775806	0.0268144	0.859534	0.110247	1.57163	5	5	5
Pde1b	Dual specificity calcium/calmodulin-dependent 3',5'-cyclic nucleotide phosphodiesterase 1B	8.98891	9.44783	8.94871	8.85396	9.01431	9.21007	9.44102	9.0284	9.41266	9.2128	9.04584	9.28301	8.97691	8.69812	9.96367	9.05074	9.26099	9.19351	0.210248	0.142767	-0.0674805	0.138424	0.564248	0.77374	0.858787	0.24853	0.111405	5	5	5
Ogdhl	oxoglutarate dehydrogenase (succinyl-transferring)	7.98476	9.07017	7.78084	7.45398	8.04512	8.39186	8.76174	8.63182	8.43936	8.41764	7.96313	8.25923	7.78488	7.66763	7.75014	8.06698	8.52848	7.885	0.461509	-0.181972	-0.643482	0.138705	0.549085	0.00099752	0.857909	0.260361	3.00108	5	5	5
Pik3c2a	Phosphatidylinositol 4-phosphate 3-kinase C2 domain-containing subunit alpha	10.5682	10.4375	9.67208	9.48178	10.3066	10.7235	11.3537	10.6164	10.0891	10.2301	10.2086	9.84747	10.0028	9.51829	9.43125	10.0932	10.6025	9.80169	0.509276	-0.291555	-0.800832	0.139071	0.297076	0.0165789	0.856764	0.527132	1.78045	5	5	5
Megf9	Multiple epidermal growth factor-like domains protein 9	6.90589	7.65425	6.71732	6.90212	6.87145	6.52361	6.46514	6.85059	6.83863	6.8475	6.82919	6.20939	6.70799	6.53687	6.75512	7.0102	6.70509	6.60771	-0.30511	-0.402493	-0.0973829	0.139623	0.0769607	0.507599	0.855042	1.11373	0.294479	5	5	5
Fbxl20	F-box/LRR-repeat protein 20	7.60145	8.17999	7.53325	7.57246	7.60054	7.97419	7.70033	8.00723	8.12254	7.84215	7.31879	7.64399	7.38362	7.59879	7.51471	7.69754	7.92929	7.49198	0.231747	-0.20556	-0.437307	0.139691	0.16957	0.00179858	0.854833	0.770652	2.74507	5	5	5
Grb2	Growth factor receptor-bound protein 2	7.04619		6.99919	6.97775	6.95239	7.04112	6.95864	7.08907	7.53763	7.5056	7.36847	7.56239	7.49942	7.64164	7.89587	6.99388	7.22641	7.59356	0.232534	0.59968	0.367146	0.140432	0.00058019	0.0407484	0.852534	3.23643	1.38989	4	5	5
B4galt7	Beta-1,4-galactosyltransferase 7	8.40236		7.45598	7.55269	7.26767	7.37294	7.32896	6.93918	7.56258	7.00346	7.16752	7.05349	7.18536	7.11491	8.02902	7.66967	7.24142	7.31006	-0.42825	-0.359616	0.0686341	0.140641	0.271891	0.758765	0.851889	0.565605	0.119893	4	5	5
Glo1	Lactoylglutathione lyase	8.93533		8.13959	8.83484	8.53215	8.52012	9.47713	8.86901	9.24119	8.96186	8.59241	8.15772	8.40274	8.22966	8.31266	8.61048	9.01386	8.33904	0.403383	-0.271442	-0.674825	0.140679	0.172858	0.00562168	0.851769	0.762311	2.25013	4	5	5
Dld	Dihydrolipoyl dehydrogenase, mitochondrial	7.84617	9.42672	7.63525	7.52292	7.75666	8.16305	8.88537	8.88222	8.62228	8.70527	8.10889	8.40099	8.01255	7.84424	8.2069	8.03755	8.65164	8.11472	0.614093	0.0771703	-0.536923	0.140741	0.837288	0.0106019	0.851579	0.0771252	1.97462	5	5	5
Faf2	FAS-associated factor 2	6.66086	7.31681	6.89534	6.64913	6.73776	6.73779	7.33906	7.06485	7.24138	7.20328	6.86306	7.33517	7.40019	7.73061	8.10495	6.85198	7.11727	7.48679	0.26529	0.634814	0.369524	0.140971	0.0304182	0.150433	0.85087	1.51687	0.822656	5	5	5
Vps13a	Intermembrane lipid transfer protein VPS13A	7.80461		7.48898	7.52829	7.66557	7.63023	8.19117	7.7117	7.9272	7.73151	7.67392	7.91081	7.97858	7.76343	7.67901	7.62186	7.83836	7.80115	0.216499	0.179286	-0.0372129	0.141047	0.0984532	0.760844	0.850635	1.00677	0.118704	4	5	5
Pithd1	PITH domain-containing protein 1	6.48545		5.75854	6.61784	6.79759	7.25005	6.80994	6.75539			6.26425					6.41485	6.93846	6.26425	0.523604	-0.150609	-0.674213	0.141185	#DIV/0!	#DIV/0!	0.850213	#DIV/0!	#DIV/0!	4	3	1
Gpd1l	Glycerol-3-phosphate dehydrogenase 1-like protein	8.95759	9.9513	8.98596	8.76478	8.98317	8.93007	8.75472	8.6211	8.75974	8.81786	8.67446	9.00894	8.62022	8.53818	8.8746	9.12856	8.7767	8.74328	-0.351862	-0.385281	-0.0334189	0.141409	0.127941	0.746805	0.849522	0.892989	0.126793	5	5	5
Alkbh1	Nucleic acid dioxygenase ALKBH1	7.92103		8.17028	8.16762		8.02084		8.41518	8.72608	8.48407	8.18161	8.20207	8.30751	8.05087	7.86367	8.08631	8.41155	8.12115	0.325235	0.0348374	-0.290398	0.141475	0.778112	0.102876	0.84932	0.108958	0.987685	3	4	5
Samhd1	Deoxynucleoside triphosphate triphosphohydrolase SAMHD1	8.97026		8.26512	8.18499	9.04807	8.6166		8.1767	7.88775	7.81692	8.08085		7.74795			8.61711	8.12449	7.9144	-0.492618	-0.702709	-0.210091	0.141501	0.119745	0.509969	0.84924	0.921742	0.292457	4	4	2
Lmtk3	Serine/threonine-protein kinase LMTK3	8.94579	10.8587	8.90141	8.96477	9.20541	8.81745	8.91583	8.88976	8.49621	8.6318	8.79253	8.02187	8.45761	8.36895	8.39949	9.37521	8.75021	8.40809	-0.625001	-0.967123	-0.342122	0.141536	0.0397277	0.0481176	0.849133	1.40091	1.3177	5	5	5
Tmem121b	Transmembrane protein 121B	10.8858		9.27214	9.51431	9.5503	9.20925	9.73563	8.97488	9.25787	8.81327	9.31938	9.57016	10.0604	9.77169	10.0083	9.80565	9.19818	9.74598	-0.607472	-0.0596646	0.547807	0.1416	0.872002	0.0304683	0.848936	0.0594824	1.51615	4	5	5
Emc6	ER membrane protein complex subunit 6	9.89374	11.2362	9.29783	9.05143	9.63989	9.22931	9.5994	9.62584	8.46787	8.40894	9.54911	7.85423	9.33101	8.46217	7.83698	9.82382	9.06627	8.6067	-0.757548	-1.21712	-0.459571	0.141788	0.0488322	0.334553	0.84836	1.31129	0.475535	5	5	5
Kif2a	Kinesin-like protein KIF2A	10.0586	11.4266	10.0133	9.77995	10.1084	9.86495	9.76794	9.59083	9.8262	9.90905	10.0415	10.1734	9.99834	9.72601	9.72905	10.2774	9.79179	9.93366	-0.485571	-0.343702	0.141869	0.141813	0.293901	0.212695	0.848285	0.531798	0.672242	5	5	5
Spata2l	Spermatogenesis-associated protein 2-like protein	7.38979	9.1861	6.88163	6.57576	7.36136	6.94356	6.5201	6.51535	6.91995	6.73304	7.07399	7.71567	6.93582	6.9708	7.33285	7.47893	6.7264	7.20583	-0.752528	-0.273098	0.47943	0.142464	0.581863	0.0237985	0.846295	0.23518	1.62345	5	5	5
Dnm3	Dynamin-3	11.049	11.0898	10.9171	10.6927	10.9509	11.1863	11.0608	10.9097	11.1837	11.0587	10.6801	10.959	10.637	10.582	10.982	10.9399	11.0798	10.768	0.139925	-0.171868	-0.311793	0.142499	0.15374	0.0132209	0.846187	0.813213	1.87874	5	5	5
Mapk10	Mitogen-activated protein kinase 10	9.70249	9.70615	9.49213	9.27588	9.309	9.57506	8.88257	9.04962	9.3576	9.36756	9.48114	9.8908	9.55164	9.30236	9.49764	9.49713	9.24648	9.54472	-0.250647	0.0475863	0.298233	0.143022	0.730215	0.0934695	0.844596	0.136549	1.02933	5	5	5
Ptges3	Prostaglandin E synthase 3	7.99631		8.26844	8.31719	7.96479	8.19571	8.43985	8.17313	8.43185	8.2865	8.03308	8.21104	7.79077	8.07982	8.27671	8.13669	8.30541	8.07828	0.168724	-0.0584018	-0.227126	0.143442	0.653122	0.0554434	0.843324	0.185006	1.25615	4	5	5
Klc1	Kinesin light chain 1	7.40869	7.20516	7.10177	7.18717	7.36754	7.3006	7.94173	7.57535	7.48936	7.15084	7.37608	6.94101	7.38406	7.14879	7.41403	7.25407	7.49158	7.25279	0.237511	-0.00127121	-0.238782	0.143559	0.990897	0.180119	0.84297	0.00397133	0.744441	5	5	5
Rock1	Rho-associated protein kinase 1	9.45889	11.4487	10.0055	9.54628	10.7988	9.45428		9.76543		8.73282	8.95063	8.43883	8.58252	7.68772		10.2516	9.31751	8.41492	-0.934137	-1.83672	-0.902586	0.144055	0.00731869	0.0762777	0.841473	2.13557	1.1176	5	3	4
Dynlrb1	Dynein light chain roadblock-type 1	8.43239	8.79242	8.23243	8.21818	8.24721	8.68222	8.85565	8.16643	8.94757	8.67614	8.64942	8.51841	8.02623	8.1059	8.3847	8.38453	8.6656	8.33693	0.281077	-0.0475951	-0.328672	0.144309	0.775609	0.105278	0.840706	0.110357	0.977661	5	5	5
Slc1a2	Excitatory amino acid transporter 2	12.472	13.4787	12.5375	12.642	12.7023	12.4307	12.3138	12.5548	12.6802	12.2453	12.4679	12.5286	12.5469	13.1365	13.2736	12.7665	12.445	12.7907	-0.321506	0.0242152	0.345722	0.144552	0.925253	0.103811	0.839975	0.0337395	0.983757	5	5	5
Atp6v1b1	V-type proton ATPase subunit B, kidney isoform	8.28887	10.3842	9.08022	8.38944		8.45038		8.04526	7.87164	8.41034	8.87469	8.96945	8.98571	9.32287	10.6185	9.03569	8.1944	9.35424	-0.84128	0.318559	1.15984	0.145359	0.588384	0.0204295	0.837558	0.230339	1.68974	4	4	5
Prkcsh	Glucosidase 2 subunit beta	6.62848		8.49139	8.6348	8.72866	8.86121	8.98597	8.96331	8.61965	8.8194	8.69814	8.56952	8.60527	8.77016	8.83911	8.12083	8.8499	8.69644	0.729074	0.575611	-0.153462	0.145529	0.234668	0.0994231	0.837052	0.629546	1.00251	4	5	5
Csk	Tyrosine-protein kinase CSK	7.4209		8.17715	7.88556	7.79024	7.91024	8.46785	8.02259	8.13643	7.99485	8.05313	8.4311	8.23036	7.72164	8.35565	7.81846	8.10639	8.15837	0.287928	0.339912	0.0519838	0.145743	0.13039	0.753078	0.836412	0.884756	0.12316	4	5	5
Myo1b	Unconventional myosin-Ib	7.33469	8.07435	7.30334	7.13328	7.36887	7.39837	6.94318	7.03864	7.20437	7.17664	7.70852	7.54384	7.466	7.39295	7.60858	7.44291	7.15224	7.54398	-0.290667	0.101072	0.391739	0.146031	0.5729	0.0033352	0.835554	0.241921	2.47688	5	5	5
Mapk3	Mitogen-activated protein kinase 3	9.21727	10.4026	9.18437	9.13621	9.09707	8.90489	9.09816	8.75974	9.13152	9.05975	9.12513	9.51222	8.99743	8.95955	9.41645	9.40751	8.99081	9.20216	-0.416701	-0.205359	0.211342	0.146503	0.474099	0.146571	0.834152	0.324131	0.833952	5	5	5
Chmp4b	Charged multivesicular body protein 4b	11.3469	11.7903	11.4776	11.9246	11.6274	11.3993	11.3523	11.5965	11.3776	11.5245	11.5907	11.3663	11.4885	11.9495	11.9213	11.6334	11.4501	11.6633	-0.183294	0.0299039	0.213198	0.14672	0.852999	0.12878	0.83351	0.0690513	0.890151	5	5	5
Kiaa0319	Dyslexia-associated protein KIAA0319 homolog	6.9942	8.68256	6.71628	6.66325	7.18767	6.54306	7.0499	6.34945	6.76056	6.38329	6.91947	6.59177	6.69504	6.75255	7.67624	7.2488	6.61725	6.92701	-0.631542	-0.321782	0.309761	0.146804	0.464409	0.222653	0.833262	0.333099	0.652371	5	5	5
Agpat5	1-acyl-sn-glycerol-3-phosphate acyltransferase epsilon	8.59312	9.63488	8.48328	8.29665	8.54697	8.82147	9.28931	9.33044	9.1896	8.97487	8.59421	8.77376	8.85463	8.96411	9.21167	8.71098	9.12114	8.87968	0.410162	0.168698	-0.241464	0.147125	0.531133	0.125582	0.832315	0.274797	0.901073	5	5	5
Pgrmc2	Membrane-associated progesterone receptor component 2	10.1896	11.8356	9.98287	9.86489	9.93039	9.97042	9.58225	9.87432	9.76138	9.55715	9.52775	9.37597	9.60849	10.362	10.2642	10.3607	9.7491	9.82769	-0.611575	-0.532991	0.0785836	0.147409	0.244254	0.72743	0.831475	0.612158	0.138209	5	5	5
Eif3e	Eukaryotic translation initiation factor 3 subunit E	8.28824	9.72568	8.43249	8.02026	8.22579	7.93919	8.08006	7.87792	8.06556	8.24065	7.97098	8.79408	8.45245	7.80681	7.89251	8.53849	8.04068	8.18337	-0.497814	-0.355123	0.142691	0.147577	0.350553	0.494755	0.83098	0.455246	0.305609	5	5	5
Lypla2	Acyl-protein thioesterase 2	8.30602		8.01688	8.00055	8.36204	8.69612	8.68957	8.13774	8.23103	8.3651	8.39075	8.45358	8.15479	7.63085	7.80345	8.17137	8.42391	8.08668	0.252538	-0.0846905	-0.337229	0.147757	0.685854	0.127537	0.830452	0.163769	0.894365	4	5	5
Dynll1	Dynein light chain 1, cytoplasmic	9.79505	10.1208	9.85753	9.77799	9.94537	9.84425	9.8006	9.83428	9.65626	9.79124	9.98033	9.86186	9.65903	9.70063	10.1589	9.89935	9.78533	9.87216	-0.114019	-0.0271873	0.0868315	0.147817	0.813044	0.400999	0.830275	0.089886	0.396857	5	5	5
Ppp2cb	Serine/threonine-protein phosphatase 2A catalytic subunit beta isoform	7.91976	8.93954	7.99543	8.02344	9.03412	8.23838	8.07636	8.09332	7.56538	7.7068	7.62939	7.37898	7.50059	7.0717	7.47607	8.38246	7.93605	7.41135	-0.446407	-0.971111	-0.524704	0.147887	0.00635158	0.0106617	0.830069	2.19712	1.97217	5	5	5
Ranbp9	Ran-binding protein 9	9.58588	10.6177	9.4547	9.17287	9.78464	9.66672	9.34259	9.06105	9.28071	9.13562	9.17473	9.28232	8.97913	8.44411	8.53097	9.72315	9.29734	8.88225	-0.425814	-0.840898	-0.415084	0.1485	0.0222102	0.0703392	0.828273	1.65345	1.1528	5	5	5
Cyb5b	Cytochrome b5 type B	9.87057	9.70841	9.79247	9.29475	9.52873	9.73234	9.39659	10.1247	10.2287	10.3275	9.6849	10.0183	9.95269	10.3265	10.9051	9.63898	9.96197	10.1775	0.32299	0.538511	0.215521	0.148543	0.0493536	0.450142	0.828147	1.30668	0.346651	5	5	5
Ahnak	AHNAK nucleoprotein (desmoyokin)	6.77082		6.21709	6.19611	6.71564	6.83761	6.83185	6.72077	7.77468	6.50501	6.38034	6.2192	6.06373	6.00524	6.5359	6.47492	6.93398	6.24088	0.45907	-0.234034	-0.693103	0.14878	0.226045	0.0201791	0.827455	0.645806	1.6951	4	5	5
Atp2c1	Calcium-transporting ATPase type 2C member 1	9.19906	10.3659	9.02732	8.98229	8.89113	8.97532	8.71181	8.70976	8.97887	8.85988	8.98863	9.07542	8.98506	9.16592	9.44234	9.29315	8.84713	9.13148	-0.446018	-0.161672	0.284346	0.148907	0.586876	0.0250874	0.827084	0.231454	1.60054	5	5	5
Clec2l	C-type lectin domain family 2 member L	9.11529	8.37874	9.37527	9.37969	9.47662	9.32215	9.78663	9.47978	9.50397	9.36208	9.36374	9.29767	9.37956	9.57679	9.4797	9.14512	9.49092	9.41949	0.3458	0.27437	-0.07143	0.149163	0.220892	0.473927	0.82634	0.65582	0.324288	5	5	5
Cpne1	Copine-1	9.73401	11.1449	9.70601	9.72786	10.0244	9.67784	9.69322	9.55315	9.65131	9.54907	9.77257	9.951	9.5761	10.1517	10.7587	10.0674	9.62492	10.042	-0.442522	-0.0254221	0.4171	0.149317	0.942623	0.0766281	0.82589	0.0256621	1.11561	5	5	5
Unc79	Protein unc-79 homolog	7.83118	9.4303	7.24365	7.53969	7.55501	7.61276	7.08938	7.02676	7.36882	7.29141	7.53847	7.56956	7.94938	7.85912	7.93116	7.91997	7.27783	7.76954	-0.642141	-0.150427	0.491714	0.149472	0.715972	0.00727624	0.82544	0.145104	2.13809	5	5	5
Ube2v1	Ubiquitin-conjugating enzyme E2 variant 1	9.1902	10.9971	9.44859	8.95457	9.44096	8.99351	9.04675	8.89159	9.15199	9.06235	8.47001	9.39095	8.73008	8.43325	8.68471	9.60629	9.02924	8.7418	-0.57705	-0.86449	-0.28744	0.14961	0.0619568	0.144147	0.82504	1.20791	0.841195	5	5	5
Naa30	N-alpha-acetyltransferase 30	9.40739	10.4533	9.30412	9.8006	9.33499	10.0966	8.52706	9.47461	7.78789	8.81474	10.0853	9.29722	9.65502	8.39503		9.66008	8.94018	9.35814	-0.719898	-0.301935	0.417963	0.149726	0.47535	0.471187	0.824702	0.322986	0.326806	5	5	4
Kcna4	Potassium voltage-gated channel subfamily A member 4	8.0821	8.78413	8.41519	8.74641	8.28788	8.2649	8.68917	8.86913	9.09898	8.96629	8.99327	9.18574	9.36179	9.48087	9.65157	8.46314	8.77769	9.33465	0.314552	0.871506	0.556954	0.149742	0.00113673	0.0165029	0.824657	2.94434	1.78244	5	5	5
Ptpn9	Tyrosine-protein phosphatase non-receptor type 9	8.83773	9.78841	8.53369	8.32392	8.60952	8.44391	8.59801	8.32521	8.33869	8.30197	8.71012	8.94042	8.63792	8.64016	8.84587	8.81865	8.40156	8.7549	-0.417098	-0.0637569	0.353341	0.149757	0.814466	0.00242765	0.824613	0.0891273	2.61481	5	5	5
Trappc10	Trafficking protein particle complex subunit 10	8.22679	9.3707	7.75471	7.51115	7.75185	8.08895	7.44039	7.33064	7.44862	7.44151	7.87795	7.84397	7.49678	7.32739	7.48955	8.12304	7.55002	7.60713	-0.573016	-0.515912	0.0571045	0.149833	0.178619	0.751358	0.824391	0.748073	0.124153	5	5	5
Phb1	Prohibitin 1	10.9165	11.2694	10.5197	9.95383	10.7614	10.8521	11.0368	11.6658	10.7801	11.2456	10.5876	10.9793	10.4868	10.7839	10.6552	10.6841	11.1161	10.6986	0.431921	0.0144342	-0.417487	0.14987	0.952605	0.0496408	0.824286	0.0210872	1.30416	5	5	5
Cpa4	Carboxypeptidase A4	8.40363		7.81106	7.53267	7.59423	8.07559	10.3834		8.3662							7.8354	8.94173	#DIV/0!	1.10633	#DIV/0!	#DIV/0!	0.150011	#DIV/0!	#DIV/0!	0.823876	#DIV/0!	#DIV/0!	4	3	0
Sbf1	Myotubularin-related protein 5	8.67561	9.21893	8.55063	8.38169	8.62265	8.53552	8.40005	8.33093	8.5011	8.51573	8.59409	8.70459	8.41438	8.16179	8.35397	8.6899	8.45667	8.44576	-0.233236	-0.244139	-0.0109034	0.150222	0.188911	0.917831	0.823266	0.723743	0.0372375	5	5	5
Mtmr9	Myotubularin-related protein 9	7.35278		7.3085	7.31469	8.26446	7.69066		6.81484	6.80069	6.80962	7.33483	7.51418	6.95122	6.60774	7.28081	7.56011	7.02895	7.13776	-0.531153	-0.422347	0.108806	0.150451	0.168927	0.694731	0.822606	0.772301	0.158184	4	4	5
Trim46	Tripartite motif-containing protein 46	8.79143	10.9359	8.57323	8.39683	9.05184	8.45497	8.53926	8.37856	8.40669	8.30267	8.66135	8.73141	8.78656	8.37998	8.36406	9.14984	8.41643	8.58467	-0.733412	-0.56517	0.168242	0.150633	0.261965	0.122419	0.822081	0.581756	0.91215	5	5	5
Bud31	Protein BUD31 homolog	7.06841	8.83913	7.63331	7.37286	7.14508	8.14482	5.86792	6.89884	6.31592	6.85983	7.10328	7.106	7.26027	7.06403	6.80032	7.61176	6.81747	7.06678	-0.794292	-0.54498	0.249312	0.150833	0.138056	0.540052	0.821502	0.859944	0.267564	5	5	5
Ank3	Ankyrin-3	7.75268	8.61141	7.69716	7.59192	7.72631	7.59568	7.52035	7.38985	7.69012	7.64872	7.83866	8.08681	7.89229	7.97239	8.05239	7.87589	7.56894	7.96851	-0.30695	0.0926124	0.399563	0.150967	0.64193	0.000479736	0.821119	0.192512	3.319	5	5	5
Ebp	3-beta-hydroxysteroid-Delta(8),Delta(7)-isomerase	6.97088		7.12313	7.11958	6.61617	6.90778	7.44537	7.03267	7.27178	7.4087	7.33549	7.51845	7.77187	8.07693	8.89389	6.95744	7.21326	7.91932	0.255818	0.961883	0.706065	0.151021	0.0218013	0.0426329	0.820962	1.66152	1.37026	4	5	5
Lars1	Leucine--tRNA ligase, cytoplasmic	7.92201	8.96425	7.69962	7.65819	7.83203	7.94943	7.42563	7.55786	7.578	7.5175	7.62367	7.55583	7.4844	6.88172	7.27271	8.01522	7.60568	7.36367	-0.409537	-0.651555	-0.242018	0.151109	0.0462467	0.172154	0.820709	1.33492	0.764084	5	5	5
Hnrnpl	Heterogeneous nuclear ribonucleoprotein L	7.3314	7.57025	7.50873	6.95935	7.59115	7.10986	7.31066	6.94696	7.39888	7.0533	7.33786	7.82082	7.30853	6.81105	7.23288	7.39217	7.16393	7.30223	-0.228243	-0.0899446	0.138299	0.151694	0.663326	0.466776	0.819031	0.178273	0.330891	5	5	5
Rpl24	Large ribosomal subunit protein eL24	9.0982	9.15309	9.01643	8.82426	9.35083	8.88745	9.18845	9.06032	8.34911	8.52678	8.97873	8.85916	8.7316	8.4123	8.90977	9.08856	8.80242	8.77831	-0.28614	-0.31025	-0.0241103	0.151766	0.0465925	0.900944	0.818827	1.33168	0.0453021	5	5	5
Paics	Bifunctional phosphoribosylaminoimidazole carboxylase/phosphoribosylaminoimidazole succinocarboxamide synthetase	8.31403	7.77633	7.8974	8.19868	8.29607	8.37083	9.18847	8.35987	8.21929	8.09577	8.14184	8.06588	7.87537	7.74829	8.01141	8.0965	8.44684	7.96856	0.350342	-0.127944	-0.478287	0.151806	0.354036	0.0475569	0.818711	0.450952	1.32279	5	5	5
Gdap2	Ganglioside-induced differentiation-associated protein 2	7.59648	8.91281	7.34304	7.52311	7.63445	7.39872	7.6179	6.85614	7.31825	7.37436	7.50882	7.66758	7.54783	7.76839	7.7509	7.80198	7.31307	7.64871	-0.488906	-0.153273	0.335633	0.151866	0.607836	0.0383895	0.81854	0.216214	1.41579	5	5	5
Blvra	Biliverdin reductase A	7.3191	8.60539	7.61904	7.1298	7.46318	7.34436	7.63877	6.88099	7.0189	6.91745	6.71495	6.94369	6.42161	5.93352	6.43063	7.6273	7.16009	6.48888	-0.467209	-1.13842	-0.671212	0.15247	0.0061031	0.0167969	0.816816	2.21445	1.77477	5	5	5
Cant1	Soluble calcium-activated nucleotidase 1	8.10168		7.77758	7.36081	7.67333	7.80792	7.29554	7.11975	7.59226	7.26352	7.80353	7.58313	7.44584	7.86677	7.79833	7.72835	7.4158	7.69952	-0.312553	-0.0288291	0.283724	0.152586	0.863486	0.0910887	0.816484	0.0637446	1.04054	4	5	5
Atrnl1	Attractin-like protein 1	6.90974	7.20346	6.65321	6.85228	6.89048	6.95411	6.99241	7.16756	7.2947	6.97341	7.17177	7.14091	7.4731	7.68773	7.74994	6.90183	7.07644	7.44469	0.174604	0.542857	0.368253	0.152595	0.00782769	0.0327679	0.816459	2.10637	1.48455	5	5	5
FAM120A	Constitutive coactivator of PPAR-gamma-like protein 1	8.00908	9.4597	8.15774	7.92741	8.16805	7.85496	7.96179	7.82191	8.01093	7.8184	8.00503	8.31355	8.22785	7.98095	8.18161	8.3444	7.8936	8.1418	-0.450797	-0.202598	0.248198	0.152624	0.504248	0.0110093	0.816376	0.297356	1.95824	5	5	5
Dpm1	Dolichol-phosphate mannosyltransferase subunit 1	7.74993	8.86048	7.53669	7.42914	7.65414	8.231	8.52472	8.46891	8.15285	8.03128	7.54033	7.6348	7.61008	8.25234	8.53963	7.84608	8.28175	7.91544	0.435673	0.0693583	-0.366315	0.152758	0.838143	0.1386	0.815995	0.0766819	0.858237	5	5	5
Rab13	Ras-related protein Rab-13	9.07618	9.24359	9.6111	9.63076	9.60027	9.28117	9.42786	9.10126	9.11997	9.2136	8.92481	9.6301	8.40136	9.44391	8.58077	9.43238	9.22877	8.99619	-0.203606	-0.436188	-0.232581	0.153079	0.13732	0.371009	0.815084	0.862267	0.430615	5	5	5
Dkk3	Dickkopf-related protein 3	5.78688		5.91166	6.0824	6.0269	6.16513	5.77352	6.22959	6.24867	6.40294	6.51359	5.70775	6.02632	5.78929	5.70933	5.95196	6.16397	5.94925	0.212006	-0.00270897	-0.214715	0.153263	0.988563	0.280045	0.814562	0.0049955	0.552772	4	5	5
Mark2	Serine/threonine-protein kinase MARK2	7.31417	8.75261	7.42346	7.35329	7.5687	7.13201	7.3123	7.03368	7.39499	7.33577	7.70701	7.98935	7.67778	7.43766	7.7012	7.68245	7.24175	7.7026	-0.440698	0.020154	0.460852	0.153445	0.945323	0.00317404	0.814047	0.02442	2.49839	5	5	5
Glyr1	Cytokine-like nuclear factor N-PAC			6.61683	6.47938					6.70493	6.70006	7.05654	6.96819	6.86864	6.54248	6.983	6.54811	6.7025	6.88377	0.154394	0.335665	0.181271	0.153865	0.0835034	0.284609	0.812862	1.0783	0.545751	2	2	5
Ap1m1	AP-1 complex subunit mu-1	7.71138		7.50386	7.19791	7.55212	7.72748	7.77817	7.50019	7.65979	7.65581	7.28843	8.09737	7.67176	7.50415	7.75016	7.49132	7.66429	7.66237	0.172973	0.171057	-0.00191666	0.154162	0.371918	0.989595	0.812023	0.429553	0.00454269	4	5	5
Trappc11	Trafficking protein particle complex subunit 11	8.16947	8.44849	8.1098	7.80847	7.96085	8.20669	7.85018	7.63246	7.86273	7.82871	8.07807	8.13714	7.94711	7.79024	8.03296	8.09942	7.87616	7.99711	-0.223261	-0.102312	0.120949	0.154169	0.430292	0.305828	0.812004	0.366237	0.514523	5	5	5
Aimp2	Aminoacyl tRNA synthase complex-interacting multifunctional protein 2	7.60136	7.85446	7.47315	7.24441	7.30954	7.39607	6.99533	6.98954	7.57259	7.28804	7.38819	7.72853	7.43956	7.24866	7.49165	7.49658	7.24831	7.45932	-0.248268	-0.0372648	0.211003	0.154182	0.788678	0.165764	0.811966	0.1031	0.78051	5	5	5
Tmx4	Thioredoxin-related transmembrane protein 4	8.27422	8.32879	7.60405	7.22713	8.08191	8.61584	8.91054	8.6055	7.87582	7.86916	7.27178	7.49922	7.3412	7.67207	7.96718	7.90322	8.37537	7.55029	0.472156	-0.352929	-0.825084	0.154197	0.18921	0.0101278	0.811925	0.723055	1.99448	5	5	5
Jam2	Junctional adhesion molecule B	8.10121	9.67601	7.981	7.88495	8.1824	8.28003	7.70625	7.90985	7.59421	7.51391	7.88573	7.41097	8.02059	7.40129	7.43815	8.36512	7.80085	7.63135	-0.564269	-0.73377	-0.169501	0.154465	0.0741496	0.401012	0.81117	1.12989	0.396843	5	5	5
Agpat4	1-acyl-sn-glycerol-3-phosphate acyltransferase delta	8.19402	8.68816	7.98707	7.81647	7.84491	8.26021	8.42425	8.38561	8.3476	8.38912	8.07211	8.40389	8.44451	8.81649	9.05012	8.10612	8.36136	8.55742	0.255231	0.4513	0.196069	0.155044	0.0898356	0.289463	0.809545	1.04655	0.538406	5	5	5
Ppp1r9a	Neurabin I	7.84931	9.83532	8.5801	8.05714	8.15397	8.30789	7.8845	7.61871	7.96043	7.7711	7.89545	7.77509	7.52234	7.52237	7.50666	8.49517	7.90853	7.64438	-0.586642	-0.850784	-0.264142	0.155178	0.0478636	0.0967986	0.809168	1.31999	1.01413	5	5	5
Cand1	Cullin-associated NEDD8-dissociated protein 1	8.7776	9.36756	8.80698	8.61002	8.88516	9.06916	9.32345	8.98032	9.00534	9.18807	8.62924	9.41531	8.96392	8.78699	9.162	8.88946	9.11327	8.99149	0.223805	0.102028	-0.121777	0.155337	0.602534	0.446873	0.808724	0.220019	0.349816	5	5	5
Ddx1	ATP-dependent RNA helicase DDX1	8.56089	9.87697	8.54396	8.24392	8.57086	8.30468	8.31245	8.31741	8.3168	8.30308	8.225	8.64703	8.38312	8.0756	8.483	8.75932	8.31089	8.36275	-0.448435	-0.39657	0.0518643	0.155563	0.226595	0.615693	0.808093	0.644749	0.210636	5	5	5
Use1	Vesicle transport protein USE1	7.23042	7.76563	6.83789	6.55554	7.00869	6.95774	6.62578	6.95483	6.53455	6.56549	6.80465	6.16001	6.51398	6.92757	7.23765	7.07963	6.72768	6.72877	-0.351956	-0.350862	0.00109423	0.155936	0.236782	0.995901	0.807054	0.625651	0.00178396	5	5	5
Pon2	Serum paraoxonase/arylesterase 2	7.7722	7.66539	7.0936	6.8534	7.3591	7.59864	7.87695	7.70034	7.66696	7.38302	7.41993	7.46942	7.63071	7.94796	8.42873	7.34874	7.64518	7.77935	0.29644	0.430611	0.134171	0.15639	0.128112	0.52756	0.805791	0.892409	0.277728	5	5	5
Negr1	Neuronal growth regulator 1	11.6824	11.9192	11.8936	12.3546	11.8892	11.6744	12.2218	11.6082	11.4606	11.2119	11.8894	11.2027	11.6325	11.7278	11.7906	11.9478	11.6354	11.6486	-0.312444	-0.299212	0.0132321	0.156649	0.102423	0.950088	0.805072	0.989602	0.0222359	5	5	5
Hnrnpab	Heterogeneous nuclear ribonucleoprotein A/B			5.99142	5.82569	6.23134		6.46706	5.9807	7.31671	6.57272	7.14808	6.94632	7.03225	6.03913	7.35004	6.01615	6.5843	6.90316	0.568149	0.887013	0.318865	0.156759	0.0300972	0.396507	0.804768	1.52147	0.40175	3	4	5
Inpp5f	Phosphatidylinositide phosphatase SAC2	8.63892		8.60057	8.57392	9.24853	8.75508	8.94782	8.16564	7.56628	7.47727	7.58024	6.89411	7.11675	6.39914		8.76548	8.18242	6.99756	-0.583066	-1.76792	-1.18486	0.15691	0.000949863	0.0214792	0.804349	3.02234	1.66798	4	5	4
Septin7	Septin-7	8.86986	9.88913	9.08951	9.08578	8.96637	9.2573	9.6174	9.50344	9.50354	9.51355	9.0361	9.37991	9.03277	9.2689	9.44292	9.18013	9.47905	9.23212	0.298916	0.0519911	-0.246925	0.156922	0.802372	0.0450126	0.804317	0.0956244	1.34667	5	5	5
Pfn2	Profilin-2	9.46446	10.3968	9.52753	9.73275	9.44732	9.96159	9.98445	10.0165	9.88557	10.1536	9.45349	9.70733	9.37746	9.40836	9.41675	9.71378	10.0003	9.47268	0.286565	-0.241102	-0.527667	0.156998	0.23549	0.000101907	0.804106	0.628027	3.9918	5	5	5
Gstp1	Glutathione S-transferase P 1	8.83829	8.83478	9.21137	9.86361	9.32279	9.50391	9.6943	9.42224	9.55659	9.42381	9.54	9.55535	9.44331	9.44545	9.91975	9.21417	9.52017	9.58077	0.306004	0.366607	0.0606037	0.157391	0.117426	0.566192	0.803021	0.930235	0.247036	5	5	5
Gabrg1	Gamma-aminobutyric acid receptor subunit gamma-1	8.28441		7.68305	8.01421	8.32649	8.32007	9.11464	8.48097	8.155	8.19288	8.167	8.09822	8.07994	8.45014	8.33175	8.07704	8.45271	8.22541	0.375673	0.14837	-0.227303	0.157644	0.366225	0.263747	0.802322	0.436252	0.578813	4	5	5
Gstm5	Glutathione S-transferase Mu 5	10.4447	10.978	10.2792	10.2196	10.5363	10.2476	10.5199	9.83544	10.3267	10.1644	9.92011	10.509	10.0989	9.89397	10.373	10.4916	10.2188	10.159	-0.272736	-0.332584	-0.059848	0.157865	0.104306	0.728045	0.801714	0.981692	0.137842	5	5	5
Mycbp2	E3 ubiquitin-protein ligase MYCBP2	7.53278	8.19132	7.24226	7.17644	7.44567	7.26824	7.33246	7.08415	7.18871	7.27174	7.46286	7.41377	7.44641	7.51457	7.50794	7.51769	7.22906	7.46911	-0.288634	-0.0485829	0.240051	0.158319	0.7957	0.000900746	0.800468	0.0992507	3.0454	5	5	5
Pfdn4	Prefoldin subunit 4	6.07817		6.76422	6.76062	6.57488	6.90286	6.57164	6.56909	7.185	7.09822	6.92404	6.86748	6.64712	7.06419	7.50564	6.54447	6.86536	7.00169	0.320886	0.45722	0.136333	0.159126	0.0713292	0.498457	0.79826	1.14673	0.302372	4	5	5
Erlec1	Endoplasmic reticulum lectin 1	7.1921	6.64987	6.61108	6.83785	6.71255	6.66293	6.94866	7.17341	7.34574	7.07951	7.00463	7.23519	7.60165	7.74769	8.09049	6.80069	7.04205	7.53593	0.24136	0.73524	0.49388	0.159523	0.00974672	0.0574738	0.797177	2.01114	1.24053	5	5	5
Hmgcl	Hydroxymethylglutaryl-CoA lyase, mitochondrial	7.3126		7.05293	6.62674	7.05163	6.64221	6.79086	6.93766	6.91296	6.63492	6.31748	6.81289	6.53503	7.40852	7.23709	7.01097	6.78372	6.8622	-0.227251	-0.148776	0.0784756	0.159702	0.591164	0.72504	0.796689	0.228292	0.139638	4	5	5
Idh3a	Isocitrate dehydrogenase [NAD] subunit alpha, mitochondrial	9.81513	10.212	9.78093	9.30003	9.82949	10.0612	9.9829	10.0487	9.86909	10.1593	9.53878	10.1842	9.70606	9.1847	9.1896	9.78752	10.0242	9.56066	0.236693	-0.226854	-0.463547	0.15974	0.363744	0.0420204	0.796587	0.439204	1.37654	5	5	5
Gk	Glycerol kinase	9.0719	9.22058	8.68742	8.28172	8.74751	8.91641	9.10678	9.3568	8.92867	9.10977	8.65225	9.02034	8.85738	8.9004	9.02119	8.80182	9.08369	8.89031	0.281862	0.0884867	-0.193375	0.160097	0.63063	0.10226	0.795617	0.200225	0.990296	5	5	5
Ppp2r2d	Serine/threonine-protein phosphatase 2A 55 kDa regulatory subunit B delta isoform	8.96855	9.53817	8.69062	8.25099	8.90991	8.96288	8.53727	8.02559	8.41695	8.4255	8.23049	8.34271	8.2803	7.99669	7.99732	8.87165	8.47364	8.1695	-0.398009	-0.702147	-0.304138	0.160302	0.0131107	0.105374	0.79506	1.88237	0.977265	5	5	5
Clta	Clathrin light chain A	9.23966	10.8698	9.49107	8.97104	9.62401	9.24213	8.92342	9.00847	9.3284	9.09676	9.63451	9.98113	9.16241	8.98375	9.22293	9.63911	9.11984	9.39695	-0.519275	-0.242165	0.27711	0.160377	0.535356	0.193917	0.794859	0.271358	0.712385	5	5	5
Abcg4	ATP-binding cassette subfamily G member 4	5.93501		5.473	6.0174	5.71735	6.04278	6.27872	5.57716	6.28648	6.18544	6.31126	6.49126	6.61015	6.93704	7.33035	5.78569	6.07412	6.73601	0.288428	0.950319	0.661891	0.160659	0.00446833	0.0180261	0.794095	2.34985	1.7441	4	5	5
Slc16a1	Monocarboxylate transporter 1	9.39529	10.9222	9.18062	9.32734	9.32733	9.30464	9.47693	8.65482	9.07868	8.88588	9.03796	9.02606	9.15853	9.22285	9.3371	9.63055	9.08019	9.1565	-0.550362	-0.474052	0.0763101	0.160824	0.188789	0.640496	0.79365	0.724024	0.193484	5	5	5
Gnl1	Guanine nucleotide-binding protein-like 1	9.38849	10.3128	9.21199	8.90339	9.21024	9.243	8.72113	8.66639	9.12532	9.19163	9.03415	9.50556	9.08121	8.66824	8.89712	9.40539	8.98949	9.03726	-0.415898	-0.368137	0.0477611	0.161178	0.21964	0.801739	0.792694	0.658289	0.095967	5	5	5
Ndufa9	NADH dehydrogenase [ubiquinone] 1 alpha subcomplex subunit 9, mitochondrial	9.88915	10.8379	9.75719	9.07511	9.73202	9.81461	10.8899	10.5553	10.1967	10.4211	9.79953	10.3988	10.1635	10.1961	10.2357	9.85828	10.3755	10.1587	0.517254	0.300467	-0.216787	0.161258	0.345142	0.320935	0.79248	0.462003	0.493583	5	5	5
Srp72	Signal recognition particle subunit SRP72	7.09182	8.30306	6.75569	6.43758	6.88661	6.81333	6.47141	6.47109	6.66798	6.52781	6.33774	6.91522	6.49477	6.45222	6.77842	7.09495	6.59032	6.59567	-0.504627	-0.499276	0.00535029	0.161326	0.177725	0.96734	0.792295	0.750251	0.0144208	5	5	5
Cdc42	Cell division control protein 42 homolog	11.1586	11.5098	11.1868	11.1084	11.3072	10.9583	11.1617	11.1058	11.2499	11.131	11.1826	11.4051	11.2473	11.5732	11.909	11.2541	11.1213	11.4634	-0.132802	0.2093	0.342102	0.161398	0.197106	0.0389064	0.792103	0.7053	1.40998	5	5	5
Slc22a6	Solute carrier family 22 member 6	7.61459		7.4513	7.32409	7.95689	8.06661	9.35157			7.62269				7.13892	6.86989	7.58672	8.34695	7.00441	0.760236	-0.582309	-1.34255	0.161524	0.0581405	0.141518	0.791762	1.23552	0.849189	4	3	2
Mms19	MMS19 nucleotide excision repair protein homolog	8.29373	9.10117	7.77846	7.50798	7.97497	8.03665	7.6509	7.70432	7.58214	7.4314	7.74403	7.89575	7.66461	7.13527	7.67644	8.13126	7.68108	7.62322	-0.450181	-0.508044	-0.0578629	0.161628	0.132106	0.731809	0.791483	0.879077	0.135602	5	5	5
Acta2	Actin, aortic smooth muscle	10.9513	11.0728	10.9506	10.4885	11.0738	11.6474	10.9405	11.1898	10.9696	11.0824	11.7581	11.1907	11.606	10.9099	10.1112	10.9074	11.1659	11.1152	0.25852	0.207822	-0.0506984	0.16196	0.523828	0.877771	0.790591	0.280811	0.0566187	5	5	5
Myof	Myoferlin	8.10358	8.69918	7.77665	7.49394	7.58085	7.80825	7.50349	7.38935	7.55005	7.63385	7.52568	7.59398	7.35817	7.5446	7.67226	7.93084	7.577	7.53894	-0.353842	-0.391904	-0.0380613	0.162042	0.119486	0.673693	0.790373	0.922682	0.171538	5	5	5
Plekhb1	Pleckstrin homology domain-containing family B member 1	8.31987	9.23841	8.32497	8.71567	8.18562	8.47564	7.838	8.01474	8.44445	8.25549	8.566	8.76052	8.41933	8.92587	9.14452	8.55691	8.20566	8.76325	-0.351243	0.206341	0.557584	0.162321	0.397643	0.0139285	0.789626	0.400507	1.85609	5	5	5
Ggt1	Glutathione hydrolase 1 proenzyme	9.35931	9.74781	9.01213	9.17996	9.06814	9.44452	8.52309	8.90672	9.05804	8.90543	9.26975	9.2116	8.92489	8.67117	8.79325	9.27347	8.96756	8.97413	-0.305912	-0.299338	0.00657324	0.162869	0.128132	0.973053	0.788161	0.892341	0.0118634	5	5	5
Lrfn1	Leucine-rich repeat and fibronectin type III domain-containing protein 1	8.1413	9.00156	8.06596	8.05903	8.1649	8.46939	8.47638	8.62958	8.66131	8.61258	8.23572	8.2491	8.3662	8.43312	8.6418	8.28655	8.56985	8.38519	0.283298	0.0986358	-0.184662	0.163034	0.625821	0.0597458	0.787722	0.20355	1.22369	5	5	5
Rnf11	RING finger protein 11	9.43284		9.59029	9.11391	9.17715	9.2105	8.50749	9.17403	9.02803	9.27802	9.06267	8.99514	8.88062	10.1085	9.81272	9.32855	9.03962	9.37193	-0.288933	0.0433776	0.33231	0.163463	0.887674	0.274266	0.78658	0.0517466	0.561828	4	5	5
Zmynd10	Zinc finger MYND domain-containing protein 10	8.65464		7.87326	7.8831	8.42496	8.47091	8.4814	9.08512			8.19858	7.83722	7.8464	7.87231	7.42218	8.20899	8.67914	7.83534	0.470155	-0.373653	-0.843808	0.163626	0.136589	0.00884941	0.786147	0.864584	2.05309	4	3	5
Idh3b	Isocitrate dehydrogenase [NAD] subunit, mitochondrial	10.217	10.9479	10.0406	9.83116	10.1467	10.5047	10.4745	10.4773	10.489	10.7431	10.2258	10.6012	10.249	9.97505	10.1667	10.2367	10.5377	10.2436	0.301042	0.00686681	-0.294175	0.163645	0.97529	0.0325074	0.786096	0.0108661	1.48802	5	5	5
Metap2	Methionine aminopeptidase 2	7.24195	10.4603	8.17393	7.25735	8.26591	7.35458	7.58647	7.94426	6.77449	6.95821	7.51276	7.06207	7.4915	6.7029	6.87313	8.27988	7.3236	7.12847	-0.956281	-1.15141	-0.195129	0.163726	0.0953466	0.484954	0.785883	1.02069	0.314299	5	5	5
Ubac1	Ubiquitin-associated domain-containing protein 1			6.18272	6.16258	6.39568	6.61355	7.60765	6.62345		6.33533	6.66277	6.921	6.6529	6.63714	7.2111	6.247	6.795	6.81698	0.548002	0.569989	0.0219873	0.16378	0.0114141	0.93869	0.78574	1.94256	0.0274779	3	4	5
Snx2	Sorting nexin-2	7.37072	6.24463	7.49427	7.20919	7.32303	7.55537	7.27855	7.3911	7.70112	7.53069	7.33813	7.84866	7.46291	7.14863	7.62282	7.12837	7.49137	7.48423	0.362999	0.355863	-0.00713626	0.164086	0.200988	0.960568	0.784928	0.696829	0.0174721	5	5	5
Sorl1	Sortilin-related receptor	10.8695	11.3063	10.7143	10.7517	10.8772	10.4763	10.8872	10.6829	10.8131	10.6898	10.6654	10.7563	10.7382	10.9659	11.2265	10.9038	10.7099	10.8705	-0.193948	-0.0333506	0.160598	0.164142	0.826051	0.230488	0.784781	0.0829929	0.637351	5	5	5
Cd9	CD9 antigen	8.07308		8.16601	8.94583	7.89276	7.77326	8.43632	7.35698	7.93074	7.60048	8.38071	8.5989	8.65598	9.17653	9.58806	8.26942	7.81956	8.88004	-0.449861	0.610618	1.06048	0.164403	0.10005	0.00586457	0.784091	0.999785	2.23176	4	5	5
Hmgb1	High mobility group protein B1	9.32248	9.78895	9.50689	9.3687	9.71757	9.04415	9.48291	9.19435	9.70255	9.08176	8.71953	8.93087	8.81078	8.72372	9.01686	9.54092	9.30115	8.84035	-0.239773	-0.700565	-0.460792	0.164476	0.000209244	0.010737	0.783897	3.67935	1.96912	5	5	5
Atp5f1a	ATP synthase subunit alpha, mitochondrial	12.9496	12.7699	12.4859	12.0018	13.0385	12.5807	13.3347	13.5627	12.8	12.9466	12.2358	13.0264	12.3963	12.4966	12.4616	12.6492	13.045	12.5233	0.395787	-0.125822	-0.521609	0.164676	0.599359	0.047396	0.78337	0.222313	1.32426	5	5	5
Dlg4	Disks large homolog 4	8.05503	8.02793	7.83882	7.85442	8.09426	7.58327	7.84663	7.76443	8.09946	7.82334	7.80774	8.18111	7.86727	8.0468	8.11422	7.97409	7.82343	8.00343	-0.150666	0.0293374	0.180003	0.164986	0.75063	0.139287	0.782553	0.124574	0.856089	5	5	5
Acap2	Arf-GAP with coiled-coil, ANK repeat and PH domain-containing protein 2	7.90259	9.40045	7.49155	7.36137	7.76878	7.47719	7.97652	7.09086	7.16244	7.14477	7.55615	7.66038	7.14555	7.23054	7.43975	7.98495	7.37036	7.40647	-0.614594	-0.578475	0.0361189	0.165316	0.165682	0.855545	0.781684	0.780724	0.0677569	5	5	5
Ak1	Adenylate kinase isoenzyme 1	9.94805	10.2675	10.0943	10.1149	9.87118	10.1149	10.1382	10.1167	10.2964	10.223	9.97543	10.0878	9.76752	9.83564	10.101	10.0592	10.1778	9.95347	0.118642	-0.105724	-0.224366	0.165389	0.302638	0.0178605	0.781493	0.519076	1.74811	5	5	5
Tomm34	Mitochondrial import receptor subunit TOM34	7.25603		7.46387	7.48635	7.4249	7.50633		7.80543	7.68121	7.34938	7.4515	7.56682	7.56754	7.61614	7.20438	7.40779	7.58559	7.48128	0.177798	0.0734886	-0.10431	0.165458	0.468667	0.419432	0.781312	0.329136	0.377339	4	4	5
Pon3	Serum paraoxonase/lactonase 3	6.66074	6.76885	6.5295	6.03296		6.67992			8.3115	6.82366	7.05344	7.26025	6.94754	6.95594	7.31041	6.49801	7.27169	7.10552	0.773678	0.607503	-0.166175	0.165647	0.00827682	0.688032	0.780817	2.08214	0.162391	4	3	5
Sipa1l1	Signal-induced proliferation-associated 1-like protein 1	8.0591	9.73035	7.78787	7.58472	8.19907	7.83962	7.73402	7.46074	7.82116	7.55585	7.80724	8.41321	8.0824	7.5834	8.14814	8.27222	7.68228	8.00688	-0.589944	-0.265344	0.3246	0.165951	0.531572	0.079311	0.780019	0.274438	1.10067	5	5	5
Cox5a	Cytochrome c oxidase subunit 5A, mitochondrial	10.2082	10.3827	9.91456	9.26735	9.97636	10.179	11.1454	10.4064	9.81863	10.3977	9.92133	10.1469	9.8848	10.0278	10.0705	9.94983	10.3895	10.0103	0.439621	0.0604328	-0.379188	0.165968	0.765673	0.126432	0.779975	0.115956	0.898144	5	5	5
Cnksr2	Connector enhancer of kinase suppressor of ras 2	8.1446	9.66551	8.05024	8.15995	8.38748	7.99044	7.93751	7.95046	8.12299	8.09423	8.40237	8.54186	8.33137	8.4465	8.39233	8.48156	8.01912	8.42289	-0.462433	-0.058671	0.403762	0.166094	0.851363	5.05677e-05	0.779646	0.0698852	4.29613	5	5	5
Anxa3	Annexin A3	9.12337	10.2266	9.08152	8.87771	9.30695	9.27577	8.94556	9.03372	8.75549	8.6084	8.94853	8.85536	8.83318	9.16554	9.5302	9.32323	8.92379	9.06656	-0.399438	-0.256663	0.142775	0.166493	0.368536	0.434385	0.778604	0.433521	0.362125	5	5	5
Eno3	Beta-enolase	9.74927	10.6493	9.68267	9.91622	10.4683	10.3607	11.784	10.845	10.1919	10.0835	9.83924	8.95677	8.91871	8.73377	8.5461	10.0932	10.653	8.99892	0.559857	-1.09424	-1.6541	0.166542	0.00612179	0.0025362	0.778475	2.21312	2.59582	5	5	5
Usp19	Ubiquitin carboxyl-terminal hydrolase 19	6.53182	7.65897	6.28631	6.1268	6.56565	6.32561	6.46728	6.1192	6.15938	5.94242	6.34899	6.51147	6.40064	6.26336	6.57279	6.63391	6.20278	6.41945	-0.431132	-0.214459	0.216673	0.16659	0.456918	0.0744788	0.77835	0.340162	1.12797	5	5	5
Ngef	Ephexin-1	9.03773	9.63657	8.89689	8.93003	9.00331	8.86517	8.91566	8.71052	9.08435	8.78524	9.10944	9.39491	9.24048	9.04836	9.27701	9.10091	8.87219	9.21404	-0.228718	0.113133	0.341851	0.166619	0.470915	0.00477129	0.778275	0.327057	2.32136	5	5	5
Pip5k1c	Phosphatidylinositol 4-phosphate 5-kinase type-1 gamma	9.92354	10.4707	9.5128	9.40574	9.76652	9.50274	9.8449	9.30354	9.50701	9.31112	9.57316	9.8508	9.48006	9.41616	9.7924	9.81586	9.49386	9.62251	-0.322	-0.193348	0.128652	0.166675	0.375537	0.352272	0.77813	0.425347	0.453121	5	5	5
Trappc9	Trafficking protein particle complex subunit 9	8.57225	9.37909	8.46111	8.24574	8.4687	8.59515	8.37424	8.08591	8.24602	8.1956	8.43492	8.50075	8.15851	8.05622	8.36858	8.62538	8.29938	8.3038	-0.325994	-0.321583	0.00441153	0.166773	0.169908	0.971907	0.777874	0.769785	0.0123751	5	5	5
Cops7a	COP9 signalosome complex subunit 7a	7.44981	7.73835	7.48006	7.55602	7.23288	7.9282	7.16632	7.82854	7.87894	7.92863	7.35557	8.32103	7.12297	7.56316	7.77342	7.49142	7.74613	7.62723	0.254702	0.135803	-0.118898	0.166781	0.554358	0.648625	0.777854	0.25621	0.188006	5	5	5
Vsnl1	Visinin-like protein 1	11.809	12.3715	11.8642	11.8586	11.81	11.9137	11.7813	11.5833	11.7384	11.7836	11.9033	12.2163	11.9808	12.2085	12.2621	11.9427	11.7601	12.1142	-0.1826	0.171554	0.354154	0.167157	0.22224	0.00416548	0.776875	0.653177	2.38033	5	5	5
Sec61b	Protein transport protein Sec61 subunit beta	8.94502	9.7493	8.71361	8.62845	8.95131	8.63479	8.94364	8.70619	8.74544	8.15226	8.53561	8.47084	8.71451	8.6704	8.51294	8.99754	8.63646	8.58086	-0.361077	-0.416681	-0.055605	0.167634	0.0752603	0.700971	0.775637	1.12343	0.1543	5	5	5
St13	Hsc70-interacting protein	7.68062		6.56838	7.01824	7.7628	8.56874	8.95684	8.018	7.43102	6.98926	7.07357		6.13107			7.25751	7.99277	6.60232	0.735264	-0.655188	-1.39045	0.167714	0.271663	0.0858181	0.775431	0.56597	1.06642	4	5	2
Cdk17	Cyclin-dependent kinase 17	7.72832	8.83504	7.52309	7.5002	7.53372	7.69674	7.42299	7.25949	7.31778	7.40102	7.80899	7.97072	7.55272	7.63339	7.83104	7.82408	7.4196	7.75937	-0.404472	-0.0647049	0.339767	0.168056	0.814363	0.0124166	0.774547	0.0891818	1.906	5	5	5
Hspa12b	Heat shock 70 kDa protein 12B	8.48942	9.46938	7.7658	7.70281	8.11483	7.87073	8.04031	7.82655	7.72789	7.56054	7.98932	7.86276	7.71523	7.44168	7.92196	8.30845	7.8052	7.78619	-0.503246	-0.522261	-0.0190149	0.168095	0.159571	0.883348	0.774446	0.797045	0.0538682	5	5	5
Gpm6b	Neuronal membrane glycoprotein M6-b	11.4753	12.0997	11.4183	11.784	11.6503	11.629	11.6534	11.3327	11.4806	11.193	11.395	11.4269	11.5674	11.775	11.6602	11.6855	11.4577	11.5649	-0.227767	-0.120623	0.107144	0.16822	0.418088	0.370451	0.774123	0.378733	0.431269	5	5	5
Smad2;Smad3	Mothers against decapentaplegic homolog 2;Mothers against decapentaplegic homolog 3	7.49505		7.4132	7.2738	7.58047	7.36865	7.35894	7.14468	7.44122	7.26367	7.48129	7.22496	7.38846	7.16203	7.51953	7.44063	7.31543	7.35526	-0.125199	-0.0853754	0.0398238	0.168658	0.412522	0.658565	0.772993	0.384553	0.181401	4	5	5
Dlgap1	Disks large-associated protein 1	7.92915	9.05995	7.64606	7.99363	7.76545	7.72122	7.57758	7.80838	7.63883	7.71315	7.81462	7.97981	8.10695	8.40209	8.24184	8.07885	7.69183	8.10906	-0.387017	0.0302148	0.417232	0.16872	0.914429	0.00503627	0.772833	0.03885	2.29789	5	5	5
Jam3	Junctional adhesion molecule C	8.07809	9.87321	7.73579	8.09898	8.40157	7.88361	7.81169	7.6088	8.07962	7.91792	8.43621	7.63432	8.25478	8.29641	8.85274	8.43753	7.86033	8.29489	-0.577199	-0.142633	0.434565	0.169095	0.744278	0.0729219	0.771869	0.128265	1.13714	5	5	5
Eif2s1	Eukaryotic translation initiation factor 2 subunit 1	7.18784	8.58659	7.74433	7.28663	7.25554	7.06715	6.82329	6.94622	7.52542	7.45289	6.92559	7.40188	7.09396	7.05821	7.55014	7.61219	7.16299	7.20596	-0.449196	-0.40623	0.0429653	0.169191	0.194989	0.818544	0.771622	0.70999	0.0869581	5	5	5
Uqcc2	Ubiquinol-cytochrome-c reductase complex assembly factor 2	7.91519		7.63398	7.68013	7.86259	7.62345	7.36398	7.86932	7.50815	7.64166	8.07966	8.11488	7.67841	7.56584	7.72146	7.77297	7.60131	7.83205	-0.171659	0.0590779	0.230737	0.169235	0.685362	0.135736	0.771511	0.16408	0.867304	4	5	5
Map2	Microtubule-associated protein 2	9.27835	10.7292	9.52988	9.68714	9.69045	9.98648	10.1253	10.3081	10.1311	10.2917	9.58217	9.89499	9.47015	9.52593	9.42745	9.78301	10.1685	9.58014	0.385515	-0.202871	-0.588386	0.169368	0.460444	0.000423083	0.771169	0.336823	3.37357	5	5	5
Comtd1	Catechol O-methyltransferase domain-containing protein 1	7.73273	9.17789	7.41058	6.90975	7.60835	8.2351	8.43749	8.54341	8.10253	8.44866	7.49187	7.80677	7.36976	7.65402	7.31376	7.76786	8.35344	7.52724	0.585577	-0.240623	-0.8262	0.169501	0.554566	0.00013745	0.770827	0.256047	3.86186	5	5	5
Bsg	Basigin	11.878	12.5047	11.9954	12.0875	12.011	11.966	11.5918	12.0028	12.0584	11.8294	11.7086	11.5941	11.9776	11.8773	12.0526	12.0953	11.8897	11.8421	-0.205652	-0.253261	-0.0476086	0.169699	0.101641	0.699306	0.770321	0.992931	0.155333	5	5	5
Tmem109	Transmembrane protein 109	7.21188		5.92271	5.84937	7.5102	7.17081	8.27397	7.27592		7.00066	6.23974	6.66525	6.82857			6.62354	7.43034	6.57785	0.806801	-0.0456882	-0.852489	0.169814	0.934648	0.0693318	0.770027	0.0293518	1.15907	4	4	3
Sec23b	Protein transport protein Sec23B	8.2122	9.65222	7.88118	7.25667	7.41617	7.36658	7.50221	7.04391	7.81841	7.32933	6.8652	7.83739	7.39287	7.49506	7.56869	8.08369	7.41209	7.43184	-0.671603	-0.651847	0.0197562	0.169896	0.190653	0.925015	0.769818	0.719756	0.0338511	5	5	5
Psmd3	26S proteasome non-ATPase regulatory subunit 3	9.45106	10.7966	9.54185	9.00859	9.51132	9.15516	9.24565	8.97181	9.34834	9.28235	9.3175	9.77892	9.38078	8.86031	9.22837	9.66188	9.20066	9.31317	-0.461216	-0.348704	0.112512	0.170989	0.326838	0.504588	0.767033	0.485668	0.297063	5	5	5
Asic2	Acid-sensing ion channel 2	8.37359	9.21223	8.09152	8.22863	8.32378	8.4887	8.07838	8.16074	7.92711	7.88429	8.31	7.87675	8.21093	7.86498	7.9297	8.44595	8.10785	8.03847	-0.338107	-0.40748	-0.0693732	0.171143	0.0987199	0.638123	0.766641	1.0056	0.195095	5	5	5
Ppp1cc	Serine/threonine-protein phosphatase PP1-gamma catalytic subunit	7.66784	9.39455	7.93064	7.55026	7.54616	7.72024	7.27227	7.33219	7.49711	7.56117	7.33803	8.02088	7.34709	7.80176	8.12089	8.01789	7.4766	7.72573	-0.541293	-0.292161	0.249132	0.171394	0.472914	0.211259	0.766003	0.325218	0.675185	5	5	5
Ina	Alpha-internexin	8.51689	9.82366	8.36341	8.14032	8.7866	8.31307	8.32302	8.41475	8.32414	7.9785	8.74409	8.51208	8.62988	9.2233	8.85651	8.72618	8.27069	8.79317	-0.455481	0.0669988	0.52248	0.171607	0.838452	0.00652843	0.765464	0.0765216	2.18519	5	5	5
Eif3d	Eukaryotic translation initiation factor 3 subunit D	7.02345		7.0212	6.6896	7.15188	7.25093	7.82727	6.98078	7.57195	6.88891	6.89375	6.59856	6.6231	6.64695	6.85018	6.97153	7.30397	6.72251	0.332435	-0.249027	-0.581462	0.171887	0.06085	0.0145749	0.764757	1.21574	1.83639	4	5	5
Igdcc4	Immunoglobulin superfamily DCC subclass member 4	5.56575			4.37511	5.93744	6.06785	5.82002	6.5983								5.29277	6.16206	#DIV/0!	0.869292	#DIV/0!	#DIV/0!	0.172558	#DIV/0!	#DIV/0!	0.763064	#DIV/0!	#DIV/0!	3	3	0
Cd34	Hematopoietic progenitor cell antigen CD34	6.52674		7.19899	7.37152	7.15455	6.6672	7.83419	7.64776	7.98543	7.51192	7.19405	7.34231	7.14969	7.54061	7.5511	7.06295	7.5293	7.35555	0.466349	0.292601	-0.173748	0.172814	0.163889	0.498218	0.76242	0.785451	0.30258	4	5	5
Arpc3	Actin-related protein 2/3 complex subunit 3	8.15468	8.52765	8.29465	8.32967	8.14515	8.0003	8.15919	8.09089	8.32362	8.21434	8.28257	8.12265	8.2638	8.00839	7.98272	8.29036	8.15767	8.13203	-0.132694	-0.158333	-0.0256398	0.17301	0.129033	0.76519	0.761929	0.8893	0.11623	5	5	5
Rhof	Rho-related GTP-binding protein RhoF	8.49136	9.81632	8.0937	8.01719	8.2743	8.24112	8.44167	7.81388	7.71915	7.78866	8.14258	8.05076	7.81325	8.10924	7.79909	8.53857	8.0009	7.98298	-0.537678	-0.555589	-0.0179114	0.173193	0.138715	0.91429	0.76147	0.857876	0.038916	5	5	5
Eif3k	Eukaryotic translation initiation factor 3 subunit K	7.32202	7.90995	7.14706	6.58448	6.98912	7.06997	7.0557	6.3412	6.83374	6.74867	6.58781	7.00665	6.73698	6.55769	6.90726	7.19053	6.80986	6.75928	-0.380671	-0.431248	-0.0505772	0.173265	0.102994	0.758571	0.761289	0.987188	0.120004	5	5	5
Rab6b	Ras-related protein Rab-6B	9.81353	11.1226	9.88975	9.71158	9.79193	9.98292	9.43066	9.42198	9.67732	9.68721	9.49126	9.59252	9.46213	9.18563	9.09745	10.0659	9.64002	9.3658	-0.425858	-0.700077	-0.274219	0.173465	0.0380671	0.0863146	0.760788	1.41945	1.06392	5	5	5
Ugt1a5;Ugt1a8;Ugt1a6b;Ugt2b17;Ugt1a2;Ugt2b36;Ugt1a9;Ugt1a1;Ugt1a6;Ugt1a7;Ugt2b35;Ugt2b37;Ugt2b38	UDP-glucuronosyltransferase;UDP-glucuronosyltransferase;UDP-glucuronosyltransferase;UDP-glucuronosyltransferase 2B17;UDP-glucuronosyltransferase 1-2;UDP-glucuronosyltransferase;UDP-glucuronosyltransferase 1A9;UDP-glucuronosyltransferase 1A1;UDP-glucuronosyltransferase 1-6;UDP-glucuronosyltransferase 1A7;UDP-glucuronosyltransferase;UDP-glucuronosyltransferase;UDP glucuronosyltransferase 2 family, …	4.80544		4.23973	3.61257	4.04664	4.35348		5.08523	4.82673	4.34106	4.31966	4.8061	4.11317	4.69917	5.28586	4.17609	4.65163	4.64479	0.475532	0.468697	-0.00683521	0.173569	0.182741	0.981303	0.760529	0.738165	0.00819683	4	4	5
Cldn10	Claudin-10	7.88546	9.39763	8.08697	8.10004	7.96097	7.8492	8.18659	7.16757	8.00524	7.76223	7.96238	7.74106	8.04262	8.07618	7.91221	8.28622	7.79416	7.94689	-0.492051	-0.339327	0.152724	0.173686	0.270797	0.426562	0.760235	0.567356	0.370018	5	5	5
Psma4	Proteasome subunit alpha type-4	7.1347		7.1026	7.12479	7.77473	7.5359	8.24585	7.39165	7.44951	7.52514	7.12042	7.43107	7.22154	7.74703	7.67765	7.28421	7.62961	7.43954	0.345405	0.155334	-0.190072	0.173849	0.462725	0.366663	0.759829	0.334677	0.435733	4	5	5
Syvn1	E3 ubiquitin-protein ligase synoviolin	7.72014	7.26596	7.32955	7.3434	7.18102	7.14284	8.16397	7.62359	7.70376	7.60061	7.45474	7.79494	7.98943	8.38446	8.47968	7.36801	7.64696	8.02065	0.278942	0.652635	0.373693	0.173974	0.0146761	0.172202	0.759516	1.83339	0.763962	5	5	5
Dnaja4	DnaJ homolog subfamily A member 4	8.39662	9.86711	8.46796	8.2139	8.4052	8.23631	8.15288	8.07747	8.3549	8.24946	8.61943	8.88533	8.68891	8.57517	9.12287	8.67016	8.21421	8.77834	-0.455953	0.108184	0.564137	0.174344	0.743009	0.000977717	0.758594	0.129006	3.00979	5	5	5
Lsamp	Limbic system-associated membrane protein	12.2251	12.6262	12.6953	13.0575	12.3946	12.6057	12.9878	12.8672	12.8736	12.8192	12.9792	12.6995	12.8328	13.0877	12.6575	12.5997	12.8307	12.8513	0.230937	0.2516	0.0206632	0.174564	0.162531	0.845854	0.758046	0.789064	0.0727047	5	5	5
Pik3r4	Phosphoinositide 3-kinase regulatory subunit 4	9.17056	10.6097	8.90445	8.62506	8.91147	9.01481	8.6872	8.51158	8.66751	8.64553	8.96247	8.94022	8.91969	8.75813	9.00932	9.24424	8.70533	8.91796	-0.538911	-0.326275	0.212636	0.174679	0.384497	0.0526416	0.757758	0.415107	1.27867	5	5	5
Slc9a6	Sodium/hydrogen exchanger 6	10.4755	10.8384	9.85205	10.0894	9.99856	10.3151	10.1046	9.87201	9.63473	9.68406	10.2227	10.0915	10.4187	10.5592	10.8697	10.2508	9.92209	10.4324	-0.328668	0.1816	0.510268	0.174702	0.442841	0.0257245	0.757703	0.353752	1.58965	5	5	5
Ube2n	Ubiquitin-conjugating enzyme E2 N	9.47446	11.4006	9.11929	9.0915	9.42305	9.30552	9.26436	8.90502	8.88212	8.85366	8.51217	8.93351	8.60975	8.12874	8.46718	9.70178	9.04214	8.53027	-0.659642	-1.17151	-0.511865	0.17484	0.0316343	0.013908	0.75736	1.49984	1.85673	5	5	5
Kcnab2	Voltage-gated potassium channel subunit beta-2	10.9605	11.352	10.8788	10.956	11.0832	10.6818	11.0843	10.8745	11.0099	10.7374	10.8646	11.0329	11.0579	11.4355	11.4563	11.0461	10.8776	11.1694	-0.168479	0.12335	0.291828	0.175224	0.417006	0.0715906	0.756406	0.379858	1.14514	5	5	5
Stub1	E3 ubiquitin-protein ligase CHIP	8.60487	9.59721	8.50693	8.41063	8.66337	8.65944	8.29058	8.42241	8.40131	8.34842	8.57649	8.35074	8.51212	8.40117	8.37989	8.7566	8.42443	8.44408	-0.332165	-0.312517	0.0196473	0.175686	0.190998	0.80318	0.755264	0.718972	0.0951869	5	5	5
Cnnm3	Metal transporter CNNM3	8.6064	9.59423	8.29013	8.35346	8.68463	8.66493	8.35811	8.28698	8.17911	8.17965	8.34988	7.75489	7.9618	7.82732	8.00019	8.70577	8.33376	7.97882	-0.372013	-0.726952	-0.35494	0.176079	0.0217276	0.0314328	0.754293	1.66299	1.50262	5	5	5
Ak5	Adenylate kinase isoenzyme 5	6.55781	8.45923	6.54526	6.60624	6.75529	6.49687	6.43513	6.40228	6.4576	6.37932	6.74663	6.96336	6.42617	6.36239	6.74591	6.98477	6.43424	6.64889	-0.550528	-0.335874	0.214653	0.176207	0.410702	0.0954671	0.753976	0.386473	1.02015	5	5	5
Rpl31	Large ribosomal subunit protein eL31	9.29789	10.1369	9.28437	9.06153	9.53453	9.03834	9.25733	9.41661	9.11014	9.01604	9.42246	9.27708	9.41268	9.14392	8.90189	9.46304	9.16769	9.23161	-0.295351	-0.231437	0.0639142	0.176211	0.298687	0.616324	0.753966	0.524784	0.210191	5	5	5
Pls3	Plastin-3	8.0233	8.1654	7.78511	7.85044	8.03002	8.05902	8.20714	7.9112	8.53098	8.07248	8.04533	7.98071	7.78445	7.76614	8.55384	7.97085	8.15617	8.02609	0.18531	0.0552389	-0.130071	0.176577	0.735838	0.483359	0.753065	0.133218	0.31573	5	5	5
Hprt1	Hypoxanthine-guanine phosphoribosyltransferase	7.72681	8.56497	7.43535	7.5966	7.86888	8.37472	8.78306	8.11437	7.82073	8.00346	7.55522	7.65478	7.49161	7.58003	7.90648	7.83852	8.21927	7.63762	0.380746	-0.200899	-0.581645	0.176699	0.362642	0.0126892	0.752766	0.440522	1.89656	5	5	5
Gba1	Lysosomal acid glucosylceramidase	9.18955	9.30698	8.28971	8.71507	8.75383	8.65538	8.76617	8.60004	8.3072	8.45046	8.62718	8.49851	8.64866	8.7609	8.8532	8.85103	8.55585	8.67769	-0.295176	-0.173338	0.121837	0.176892	0.393441	0.260248	0.752292	0.40512	0.584612	5	5	5
Ykt6	Synaptobrevin homolog YKT6	9.84785	11.2516	9.86568	9.91049	10.0909	9.7568	10.047	9.67298	9.77747	9.66363	9.65063	9.83478	9.87701	10.0717	10.1129	10.1933	9.78357	9.9094	-0.409738	-0.283917	0.125821	0.177274	0.341794	0.282106	0.751356	0.466236	0.549587	5	5	5
Tamm41	Phosphatidate cytidylyltransferase, mitochondrial	5.69299		6.66848	6.32072	6.51937	6.06294	6.71568	6.84238	6.82254	7.10187	6.82501	7.12903	6.89661	6.86806	6.23951	6.30039	6.70908	6.79164	0.408693	0.491253	0.0825594	0.177377	0.0924615	0.726583	0.751104	1.03404	0.138715	4	5	5
Usp34	Ubiquitin carboxyl-terminal hydrolase 34	7.5876	8.45491	6.48484	6.47465	7.05784	6.58887	7.15852	6.48869	6.36388	6.51872	6.51784	6.78005	6.66672	6.70398	6.93208	7.21197	6.62373	6.72014	-0.588233	-0.491832	0.0964015	0.17755	0.230689	0.549681	0.75068	0.636974	0.25989	5	5	5
Enpep	Glutamyl aminopeptidase	8.52227	9.80262	8.65616	8.74472	8.62038	8.85686	8.51893	8.30811	8.41096	8.3629	8.73205	8.32807	8.36961	8.05904	8.34009	8.86923	8.49155	8.36577	-0.377677	-0.503457	-0.125779	0.177571	0.0881315	0.411354	0.750628	1.05487	0.385785	5	5	5
Fut8	Alpha-(1,6)-fucosyltransferase	8.91135	10.5864	8.77855	8.38726	8.75721	8.42998	8.6068	8.37821	8.76773	8.3279	8.31414	8.58277	8.51787	9.04405	9.58646	9.08415	8.50212	8.80906	-0.582029	-0.275095	0.306934	0.177876	0.556185	0.240647	0.749883	0.25478	0.618619	5	5	5
Trim9	E3 ubiquitin-protein ligase TRIM9	8.30362	9.18789	8.30298	8.3194	8.70054	8.15713	8.4411	8.21585	8.44174	8.19517	8.21338	8.3341	8.29722	8.40291	8.52533	8.56289	8.2902	8.35459	-0.27269	-0.208301	0.0643889	0.177898	0.284243	0.452762	0.749828	0.54631	0.34413	5	5	5
Adprh	ADP-ribosylhydrolase ARH1	8.73334	10.2107	8.29961	8.07036	8.59924	8.41796	8.28134	7.887	8.282	8.19886	8.11987	8.71662	8.17096	7.84579	8.49334	8.78264	8.21343	8.26932	-0.569211	-0.513325	0.0558856	0.178148	0.240443	0.758979	0.74922	0.618988	0.11977	5	5	5
Farsa	Phenylalanine--tRNA ligase alpha subunit	7.83727	9.62651	8.00876	7.39116	7.80577	7.35952	7.82391	7.39944	7.60582	7.56459	7.32855	8.10818	7.65083	7.34264	7.95788	8.13389	7.55066	7.67762	-0.583239	-0.456278	0.126961	0.178513	0.306483	0.496726	0.74833	0.513594	0.303883	5	5	5
Brcc3	Lys-63-specific deubiquitinase BRCC36	6.31176		6.57116	6.13548	6.6014	6.56493	8.09167	6.93616	6.69359	6.3964	6.51898	6.75907	6.1955	6.29924	6.36886	6.40495	6.93655	6.42833	0.5316	0.0233813	-0.508218	0.178938	0.878721	0.148034	0.747299	0.0561489	0.829639	4	5	5
Vamp7	Vesicle-associated membrane protein 7	8.09917	9.43275	7.86537	7.98363	8.08011	7.92145	7.98971	7.85121	7.64452	7.88919	8.22221	7.92837	8.10838	8.00862	8.3203	8.29221	7.85921	8.11758	-0.432994	-0.174632	0.258362	0.179003	0.572348	0.0224599	0.747139	0.24234	1.64859	5	5	5
Usp46	Ubiquitin carboxyl-terminal hydrolase 46	8.28583	9.43923	7.82945	7.6953	7.9862	7.95046	7.89013	7.39327	7.87832	7.69658	8.03857	8.29222	8.17387	7.98022	8.10459	8.2472	7.76175	8.11789	-0.485448	-0.129307	0.356141	0.17925	0.695377	0.0147555	0.746542	0.15778	1.83105	5	5	5
Snrpd3	Small nuclear ribonucleoprotein Sm D3	8.43443	10.4694	8.43503	8.10371	8.95723	8.04455	9.02824	8.02095	8.0492	7.77745	8.04338	8.19048	8.15018	7.45935	7.00048	8.87997	8.18408	7.76877	-0.695887	-1.11119	-0.415306	0.179398	0.0494609	0.228323	0.746183	1.30574	0.641451	5	5	5
Aup1	Lipid droplet-regulating VLDL assembly factor AUP1	5.93316		5.52857	5.40259	6.09819	6.1364	6.35409	5.83369	5.82491	5.93054	5.84021	5.67131	6.14791	6.45156	5.7944	5.74063	6.01592	5.98108	0.275297	0.24045	-0.0348466	0.179479	0.301842	0.846289	0.745986	0.52022	0.0724812	4	5	5
Hmgb2	High mobility group protein B2	4.08914			1.20175	0.376272	5.67464	3.21932	3.60263	1.69623	4.36903	4.34164	2.18764	4.13964		1.69124	1.88905	3.71237	3.09004	1.82332	1.20098	-0.622332	0.179496	0.374932	0.533367	0.745946	0.426047	0.272974	3	5	4
Dpp6	Dipeptidyl aminopeptidase-like protein 6	12.8502	12.7925	13.1017	13.154	13.0878	13.031	13.1071	13.1137	13.1822	13.1185	13.1938	13.1157	13.2459	13.492	13.44	12.9973	13.1105	13.2975	0.113242	0.30023	0.186987	0.179863	0.019369	0.0396971	0.745058	1.71289	1.40124	5	5	5
Als2	Alsin	7.79455		7.63695	7.21691	7.42707	7.32651	6.91794	6.64417	7.49324	7.53505	7.57909	7.52568	7.35748	7.53282	7.58536	7.51887	7.18338	7.51609	-0.33549	-0.00278766	0.332702	0.180396	0.982109	0.0989877	0.743772	0.00784048	1.00442	4	5	5
Slc7a14	Probable cationic amino acid transporter	8.77964	9.19543	8.40875	8.4218	8.567	8.476	8.81104	8.12163	8.22447	8.35336	8.9427	8.70065	8.65869	8.4794	8.65375	8.67452	8.3973	8.68704	-0.277221	0.0125167	0.289738	0.180399	0.941098	0.0733894	0.743766	0.0263651	1.13437	5	5	5
Cnnm2	Metal transporter CNNM2	9.72574	10.9233	9.37661	9.61166	9.52049	9.44655	9.38287	9.42329	9.46616	9.38988	9.09331	9.1395	9.28595	9.37299	9.09949	9.83156	9.42175	9.19825	-0.409813	-0.633311	-0.223499	0.180498	0.056575	0.00490882	0.743526	1.24738	2.30902	5	5	5
Tuba1c	Tubulin alpha-1C chain	13.8632	13.9797	13.9721	13.4336	13.6593	13.826	14.177	13.7371	14.1031	14.0482	13.9874	14.4222	13.945	13.9355	14.2495	13.7816	13.9783	14.1079	0.196695	0.32632	0.129624	0.180557	0.0516563	0.343097	0.743386	1.28688	0.464583	5	5	5
Chmp5	Charged multivesicular body protein 5	5.89139		5.86571	6.39858	5.92157			5.83551	7.29798	6.72728	5.88245	6.28925	5.73996	7.46139	6.88142	6.01931	6.62026	6.45089	0.600947	0.431582	-0.169365	0.180634	0.294266	0.759684	0.743201	0.53126	0.119367	4	3	5
Fkbp1b	Peptidyl-prolyl cis-trans isomerase FKBP1B	10.1343	10.8709	8.39171	8.5615	9.74593	9.3546	9.0017	9.09542	8.15399	8.20266	7.4775		7.75349	7.40191	7.79775	9.54087	8.76167	7.60766	-0.779194	-1.9332	-1.15401	0.180655	0.00908824	0.00544041	0.74315	2.04152	2.26437	5	5	4
Ergic2	Endoplasmic reticulum-Golgi intermediate compartment protein 2	7.80077		7.01453	7.31553	7.33388	7.24054	7.80317	7.62634	8.21946	7.64289	7.45926	8.28445	7.94379	8.5284	9.1658	7.36618	7.70648	8.27634	0.340305	0.910163	0.569859	0.180957	0.0369397	0.119143	0.742424	1.43251	0.923933	4	5	5
Adcy9	Adenylate cyclase type 9	9.48723	10.8672	9.30227	9.37134	9.7564	9.22951	9.60169	9.31034	9.27948	9.18526	9.39641	9.25384	9.56588	9.36765	9.00183	9.75689	9.32126	9.31712	-0.435633	-0.43977	-0.00413726	0.181064	0.184603	0.973038	0.742168	0.733761	0.0118702	5	5	5
Kif21b	Kinesin-like protein KIF21B			6.69335	6.07005	6.38422	7.37109		7.1659	6.15984	6.99991	6.86587	7.04717	6.89635	6.41562	5.84719	6.38254	6.92419	6.61444	0.541646	0.231901	-0.309745	0.181083	0.495993	0.393578	0.742123	0.304524	0.404969	3	4	5
Ywhaq	14-3-3 protein theta	9.14984	10.2608	9.57217	10.0092	9.53828	9.83562	10.2577	9.95591	10.0358	9.95601	9.71399	9.7982	9.52003	9.64767	10.1376	9.70605	10.0082	9.76349	0.302158	0.0574425	-0.244716	0.181654	0.800942	0.0867955	0.740756	0.0963989	1.0615	5	5	5
Fbxo6	F-box only protein 6	7.00901	8.82229	6.91502	7.25288	7.10235	6.94163	6.96955	6.88801	6.82699	6.87653	7.00668	6.89315	6.83821	7.2378	7.05605	7.42031	6.90054	7.00638	-0.519764	-0.41393	0.105834	0.182187	0.285522	0.190899	0.739484	0.544361	0.719197	5	5	5
Fis1	Mitochondrial fission 1 protein	7.39078	8.64692	7.6221	7.75922	7.3714	8.00083	7.86824	8.08688	8.3585	8.31219	7.9595	8.29943	8.04032	8.10944	8.26158	7.75808	8.12533	8.13405	0.367243	0.375971	0.00872747	0.1824	0.15969	0.940386	0.738974	0.796721	0.026694	5	5	5
Upf2	Regulator of nonsense transcripts 2	8.13618	9.17387	8.79752	8.94162	9.28674	8.66326	8.61144	8.48237	8.46136	8.61678	8.6912	8.47255	8.43373	8.11217	8.1038	8.86719	8.56704	8.36269	-0.300144	-0.504497	-0.204353	0.182792	0.0607226	0.12634	0.738043	1.21665	0.898458	5	5	5
Lrfn4	Leucine-rich repeat and fibronectin type-III domain-containing protein 4	8.11211		7.61496	7.74916	8.23348	8.78604	8.21246	8.50071	7.7774							7.92743	8.31915	#DIV/0!	0.391721	#DIV/0!	#DIV/0!	0.183047	#DIV/0!	#DIV/0!	0.737438	#DIV/0!	#DIV/0!	4	4	0
Actg1	Actin, cytoplasmic 2	13.4885	13.2276	13.2903	13.0446	13.536	13.655	12.0784	13.3261	12.8184	12.5929	13.115	12.423	12.9217	12.1878	11.8962	13.3174	12.8942	12.5087	-0.423239	-0.808643	-0.385404	0.183222	0.0104841	0.311985	0.737023	1.97947	0.505866	5	5	5
Impdh2	Inosine-5'-monophosphate dehydrogenase 2	6.19623	7.866	6.54361	6.55891	6.43488	6.93486	7.41269	6.90189	7.52636	7.14848	7.24536	7.37836	7.14683	6.97174	7.13923	6.71993	7.18486	7.17631	0.464929	0.45638	-0.00854876	0.183403	0.168317	0.953403	0.736594	0.773873	0.0207233	5	5	5
Trappc5	Trafficking protein particle complex subunit 5	7.77157	8.81702	7.72957	7.41486	7.75776	7.86501	7.75596	7.16771	7.25137	7.44799	7.6995	7.92466	7.68826	7.61619	7.52049	7.89816	7.49761	7.68982	-0.400547	-0.208334	0.192213	0.183758	0.425503	0.242052	0.735755	0.371097	0.616092	5	5	5
[truncated: 2,618 more rows]

## Sheet: Brain-EV prot_Comm and unique
Brain-EV proteins identified in at least 3 samples, related to Fig. 7g
Unique			Commom
WT	PS19	PS19/P2rx7KO	WT and PS19	WT and PS19/P2rx7KO	PS19 and PS19/P2rx7KO
[truncated: 66 more rows]

## Sheet: Brain-EV prot_Rank
Rank of brain-EV proteins identified by DIA mass spectometry, related to Extended Data Fig. 6e
[truncated: 4,085 more rows]

[truncated: 3 more sheets: Brain-EV prot_WGCNA, Brain-EV prot_GO_WGCNA, Brain-EV prot_mtProt]
