# Supplementary material for: P2RX7 regulates tauopathy progression via tau and mitochondria loading in extracellular vesicles
Source: Research Square preprint supplement (doi:10.21203/rs.3.rs-6771517/v1), 2025-06-23
Supplement: Supplementary file 4 [file 676fa42fe233dd7273e3044c.xlsx]

## Sheet: MG_PS19_P2rx7KO-EV vs PS19-EV
Sorted microglia RNA-seq - PS19/P2rx7KO-EV vs PS19-EV injection
feature	symbol	gene_title	logFC	meta.q
ENSMUSG00000034390	Cmip	c-Maf inducing protein	-0.8827	0.0289922
ENSMUSG00000028270	Gbp2	guanylate binding protein 2	-0.8725	0.0463131
ENSMUSG00000033355	Rtp4	receptor transporter protein 4	-0.8694	0.0399446
ENSMUSG00000070390	Nlrp1b	NLR family, pyrin domain containing 1B	-0.7928	0.017182
ENSMUSG00000070327	Rnf213	ring finger protein 213	-0.6263	0.0292461
ENSMUSG00000035686	Thrsp	thyroid hormone responsive	-0.6191	0.0311554
ENSMUSG00000049086	Bmyc	brain expressed myelocytomatosis oncogene	-0.5345	0.0067526
ENSMUSG00000037742	Eef1a1	eukaryotic translation elongation factor 1 alpha 1	-0.5278	0.0006324
ENSMUSG00000049734	Trex1	three prime repair exonuclease 1	-0.5221	0.0017468
ENSMUSG00000030246	Ldhb	lactate dehydrogenase B	-0.4611	0.001822
ENSMUSG00000002768	Mea1	male enhanced antigen 1	-0.4606	0.0420549
ENSMUSG00000034868	Myl12b	myosin, light chain 12B, regulatory	-0.4593	0.0039127
ENSMUSG00000025646	Atrip	ATR interacting protein	-0.4566	0.0030116
ENSMUSG00000062382	Ftl1-ps2	ferritin light polypeptide, pseudogene 2	-0.4566	0.0306693
ENSMUSG00000030844	Rgs10	regulator of G-protein signalling 10	-0.4487	0.027738
ENSMUSG00000022283	Pabpc1	poly(A) binding protein, cytoplasmic 1	-0.448	0.0072914
ENSMUSG00000024696	Lpxn	leupaxin	-0.4411	0.0051991
ENSMUSG00000045730	Adrb2	adrenergic receptor, beta 2	-0.4371	0.003203
ENSMUSG00000018707	Dync1h1	dynein cytoplasmic 1 heavy chain 1	-0.4232	0.0230197
ENSMUSG00000001123	Lgals9	lectin, galactose binding, soluble 9	-0.4005	0.0015864
ENSMUSG00000031851	Ntpcr	nucleoside-triphosphatase, cancer-related	-0.4003	0.0039127
ENSMUSG00000057666	Gapdh	glyceraldehyde-3-phosphate dehydrogenase	-0.3987	0.0295787
ENSMUSG00000030220	Arhgdib	Rho, GDP dissociation inhibitor beta	-0.3889	0.010111
ENSMUSG00000040385	Ppp1ca	protein phosphatase 1 catalytic subunit alpha	-0.386	0.0065514
ENSMUSG00000028745	Capzb	capping actin protein of muscle Z-line subunit bet...	-0.384	0.0076626
ENSMUSG00000098112	Bin2	bridging integrator 2	-0.3833	0.001331
ENSMUSG00000042106	Inka1	inka box actin regulator 1	-0.38	0.0445268
ENSMUSG00000035202	Lars2	leucyl-tRNA synthetase, mitochondrial	-0.3756	0.0233493
ENSMUSG00000039682	Lap3	leucine aminopeptidase 3	-0.3752	0.0154361
ENSMUSG00000024338	Psmb8	proteasome (prosome, macropain) subunit, beta type...	-0.3735	0.0121726
ENSMUSG00000013707	Tnfaip8l2	tumor necrosis factor, alpha-induced protein 8-lik...	-0.3683	0.0269559
ENSMUSG00000004667	Polr2e	polymerase (RNA) II (DNA directed) polypeptide E	-0.3682	0.0319234
ENSMUSG00000024835	Coro1b	coronin, actin binding protein 1B	-0.3621	0.0058904
ENSMUSG00000028692	Akr1a1	aldo-keto reductase family 1, member A1	-0.3604	0.0039127
ENSMUSG00000006782	Cnp	2',3'-cyclic nucleotide 3' phosphodiesterase	-0.3575	0.0181448
ENSMUSG00000023277	Twf2	twinfilin actin binding protein 2	-0.3489	0.010867
ENSMUSG00000034994	Eef2	eukaryotic translation elongation factor 2	-0.3398	0.0015105
ENSMUSG00000033940	Brk1	BRICK1, SCAR/WAVE actin-nucleating complex subunit	-0.3351	0.0147481
ENSMUSG00000001741	Il16	interleukin 16	-0.3336	0.0412683
ENSMUSG00000079110	Capn3	calpain 3	-0.3333	0.001822
ENSMUSG00000021218	Gdi2	GDP dissociation inhibitor 2	-0.3179	0.0043817
ENSMUSG00000021486	Prelid1	PRELI domain containing 1	-0.3132	0.0374726
ENSMUSG00000002102	Psmc3	proteasome (prosome, macropain) 26S subunit, ATPas...	-0.3097	0.0493051
ENSMUSG00000049625	Tifab	TRAF-interacting protein with forkhead-associated ...	-0.3093	0.0216928
ENSMUSG00000038607	Gng10	guanine nucleotide binding protein (G protein), ga...	-0.3091	0.0420549
ENSMUSG00000018008	Cyth4	cytohesin 4	-0.3007	0.0186347
ENSMUSG00000006304	Arpc2	actin related protein 2/3 complex, subunit 2	-0.2984	0.0397378
ENSMUSG00000032300	1700017B05Rik	RIKEN cDNA 1700017B05 gene	-0.2981	0.0249835
ENSMUSG00000027540	Ptpn1	protein tyrosine phosphatase, non-receptor type 1	-0.2976	0.0340707
ENSMUSG00000033220	Rac2	Rac family small GTPase 2	-0.2929	0.0256
ENSMUSG00000003283	Hck	hemopoietic cell kinase	-0.2906	0.0170396
ENSMUSG00000075595	Zfp652	zinc finger protein 652	-0.2896	0.0160375
ENSMUSG00000024663	Rab3il1	RAB3A interacting protein (rabin3)-like 1	-0.2894	0.0162485
ENSMUSG00000018381	Abi3	ABI family member 3	-0.2774	0.0277132
ENSMUSG00000030272	Camk1	calcium/calmodulin-dependent protein kinase I	-0.2773	0.0300718
ENSMUSG00000029622	Arpc1b	actin related protein 2/3 complex, subunit 1B	-0.2674	0.0432028
ENSMUSG00000030057	Cnbp	cellular nucleic acid binding protein	-0.257	0.0157926
ENSMUSG00000029484	Anxa3	annexin A3	-0.2509	0.0157295
ENSMUSG00000073982	Rhog	ras homolog family member G	-0.2502	0.039933
ENSMUSG00000000346	Dazap2	DAZ associated protein 2	-0.2496	0.0383491
ENSMUSG00000028599	Tnfrsf1b	tumor necrosis factor receptor superfamily, member...	0.1474	0.0455159
ENSMUSG00000032440	Tgfbr2	transforming growth factor, beta receptor II	0.1475	0.0277231
ENSMUSG00000010095	Slc3a2	solute carrier family 3 (activators of dibasic and...	0.1614	0.0336241
ENSMUSG00000040462	Os9	amplified in osteosarcoma	0.1703	0.0266257
ENSMUSG00000040354	Mars1	methionine-tRNA synthetase 1	0.197	0.035519
ENSMUSG00000030058	Copg1	coatomer protein complex, subunit gamma 1	0.1981	0.0457415
ENSMUSG00000031532	Saraf	store-operated calcium entry-associated regulatory...	0.2062	0.0163222
ENSMUSG00000052384	Nrros	negative regulator of reactive oxygen species	0.2122	0.0233908
ENSMUSG00000038023	Atp6v0a2	ATPase, H+ transporting, lysosomal V0 subunit A2	0.2124	0.0160753
ENSMUSG00000023942	Slc29a1	solute carrier family 29 (nucleoside transporters)...	0.2145	0.0394121
ENSMUSG00000024758	Rtn3	reticulon 3	0.2207	0.0348114
ENSMUSG00000032434	Cmtm6	CKLF-like MARVEL transmembrane domain containing 6	0.2224	0.0087636
ENSMUSG00000020092	Pald1	phosphatase domain containing, paladin 1	0.2224	0.0357926
ENSMUSG00000022901	Cd86	CD86 antigen	0.2284	0.0026048
ENSMUSG00000005142	Man2b1	mannosidase 2, alpha B1	0.2294	0.0317058
ENSMUSG00000039206	Daglb	diacylglycerol lipase, beta	0.2303	0.0275316
ENSMUSG00000036275	9530068E07Rik	RIKEN cDNA 9530068E07 gene	0.2306	0.013507
ENSMUSG00000019055	Plod1	procollagen-lysine, 2-oxoglutarate 5-dioxygenase 1	0.2333	0.0057615
ENSMUSG00000034659	Tmem109	transmembrane protein 109	0.239	0.0207929
ENSMUSG00000054693	Adam10	a disintegrin and metallopeptidase domain 10	0.2419	0.0337514
ENSMUSG00000032042	Srpra	signal recognition particle receptor alpha	0.247	0.0238302
ENSMUSG00000036943	Rab8b	RAB8B, member RAS oncogene family	0.2478	0.042806
ENSMUSG00000052593	Adam17	a disintegrin and metallopeptidase domain 17	0.249	0.0189703
ENSMUSG00000021484	Lman2	lectin, mannose-binding 2	0.2499	0.0009969
ENSMUSG00000040747	Cd53	CD53 antigen	0.2533	0.0031172
ENSMUSG00000027405	Nop56	NOP56 ribonucleoprotein	0.2633	0.0400657
ENSMUSG00000020346	Mgat1	mannoside acetylglucosaminyltransferase 1	0.2634	0.017942
ENSMUSG00000031903	Pla2g15	phospholipase A2, group XV	0.2671	0.0122002
ENSMUSG00000065954	Tacc1	transforming, acidic coiled-coil containing protei...	0.2671	0.0308236
ENSMUSG00000028657	Ppt1	palmitoyl-protein thioesterase 1	0.2677	0.0054347
ENSMUSG00000022892	App	amyloid beta precursor protein	0.2708	0.0315156
ENSMUSG00000033777	Tlr13	toll-like receptor 13	0.2721	0.0233029
ENSMUSG00000021687	Scamp1	secretory carrier membrane protein 1	0.2796	0.0497515
ENSMUSG00000020399	Havcr2	hepatitis A virus cellular receptor 2	0.282	0.0350375
ENSMUSG00000032116	Stt3a	STT3, subunit of the oligosaccharyltransferase com...	0.2826	0.0103963
ENSMUSG00000039621	Prex1	phosphatidylinositol-3,4,5-trisphosphate-dependent...	0.287	0.0468003
ENSMUSG00000026627	Pacc1	proton activated chloride channel 1	0.2884	0.0412683
ENSMUSG00000000290	Itgb2	integrin beta 2	0.2905	0.001795
ENSMUSG00000019810	Fuca2	fucosidase, alpha-L- 2, plasma	0.2921	0.0287382
ENSMUSG00000024621	Csf1r	colony stimulating factor 1 receptor	0.2922	0.0217572
ENSMUSG00000026600	Soat1	sterol O-acyltransferase 1	0.2924	0.0177449
ENSMUSG00000033629	Hacd3	3-hydroxyacyl-CoA dehydratase 3	0.293	0.0143598
ENSMUSG00000019877	Serinc1	serine incorporator 1	0.297	0.0132932
ENSMUSG00000003458	Ncstn	nicastrin	0.2971	0.016093
ENSMUSG00000022912	Pros1	protein S (alpha)	0.2985	0.0199547
ENSMUSG00000030894	Tpp1	tripeptidyl peptidase I	0.3047	0.0028018
ENSMUSG00000027828	Ssr3	signal sequence receptor, gamma	0.3055	0.0257604
ENSMUSG00000030748	Il4ra	interleukin 4 receptor, alpha	0.3081	0.0305737
ENSMUSG00000001424	Snd1	staphylococcal nuclease and tudor domain containin...	0.3087	0.0057615
ENSMUSG00000041891	Lman1	lectin, mannose-binding, 1	0.3087	0.0076007
ENSMUSG00000056429	Tgoln1	trans-golgi network protein	0.3097	0.0054121
ENSMUSG00000034160	Ogt	O-linked N-acetylglucosamine (GlcNAc) transferase ...	0.3118	0.0328794
ENSMUSG00000036362	P2ry13	purinergic receptor P2Y, G-protein coupled 13	0.316	0.0122771
ENSMUSG00000026657	Frmd4a	FERM domain containing 4A	0.3167	0.0212273
ENSMUSG00000070738	Dgkd	diacylglycerol kinase, delta	0.3172	0.0317122
ENSMUSG00000052336	Cx3cr1	C-X3-C motif chemokine receptor 1	0.3188	0.0074737
ENSMUSG00000020590	Snx13	sorting nexin 13	0.3218	0.0360108
ENSMUSG00000031129	Slc9a9	solute carrier family 9 (sodium/hydrogen exchanger...	0.3225	0.0370417
ENSMUSG00000068040	Tm9sf4	transmembrane 9 superfamily member 4	0.3253	0.0126703
ENSMUSG00000020964	Sel1l	sel-1 suppressor of lin-12-like (C. elegans)	0.3311	0.0034189
ENSMUSG00000055782	Abcd2	ATP-binding cassette, sub-family D member 2	0.3332	0.0440422
ENSMUSG00000049076	Acap2	ArfGAP with coiled-coil, ankyrin repeat and PH dom...	0.3344	0.0476345
ENSMUSG00000005514	Por	cytochrome p450 oxidoreductase	0.338	0.0406475
ENSMUSG00000089911	Mfsd14a	major facilitator superfamily domain containing 14...	0.3396	0.0100216
ENSMUSG00000021477	Ctsl	cathepsin L	0.3399	0.006408
ENSMUSG00000031007	Atp6ap2	ATPase, H+ transporting, lysosomal accessory prote...	0.3439	0.0112713
ENSMUSG00000071650	Ganab	alpha glucosidase 2 alpha neutral subunit	0.3459	0.0074383
ENSMUSG00000036636	Clcn7	chloride channel, voltage-sensitive 7	0.3552	0.0115165
ENSMUSG00000029998	Pcyox1	prenylcysteine oxidase 1	0.3576	0.0092218
ENSMUSG00000024566	Atp9b	ATPase, class II, type 9B	0.3601	0.0205557
ENSMUSG00000014355	Anapc1	anaphase promoting complex subunit 1	0.3614	0.0498017
ENSMUSG00000025873	Faf2	Fas associated factor family member 2	0.3618	0.0099375
ENSMUSG00000073725	Lmbrd1	LMBR1 domain containing 1	0.3631	0.017182
ENSMUSG00000005949	Ctns	cystinosis, nephropathic	0.3654	0.036476
ENSMUSG00000027111	Itga6	integrin alpha 6	0.3679	0.0094573
ENSMUSG00000029767	Calu	calumenin	0.37	0.0103963
ENSMUSG00000051212	Gpr183	G protein-coupled receptor 183	0.3726	0.0288024
ENSMUSG00000019087	Atp6ap1	ATPase, H+ transporting, lysosomal accessory prote...	0.3737	0.0027178
ENSMUSG00000031826	Usp10	ubiquitin specific peptidase 10	0.3749	0.0153869
ENSMUSG00000023030	Slc11a2	solute carrier family 11 (proton-coupled divalent ...	0.3774	0.0157893
ENSMUSG00000021756	Il6st	interleukin 6 signal transducer	0.3795	0.0263715
ENSMUSG00000078622	Ccdc47	coiled-coil domain containing 47	0.3815	0.0249793
ENSMUSG00000019302	Atp6v0a1	ATPase, H+ transporting, lysosomal V0 subunit A1	0.3847	0.0036065
ENSMUSG00000046805	Mpeg1	macrophage expressed gene 1	0.3874	0.011506
ENSMUSG00000037470	Uggt1	UDP-glucose glycoprotein glucosyltransferase 1	0.3889	0.0042942
ENSMUSG00000007613	Tgfbr1	transforming growth factor, beta receptor I	0.3978	0.0094674
ENSMUSG00000019818	Cd164	CD164 antigen	0.3996	0.001522
ENSMUSG00000030786	Itgam	integrin alpha M	0.4019	0.0092683
ENSMUSG00000054604	Cggbp1	CGG triplet repeat binding protein 1	0.4064	0.028366
ENSMUSG00000037902	Sirpa	signal-regulatory protein alpha	0.407	0.0198205
ENSMUSG00000027775	Mfsd1	major facilitator superfamily domain containing 1	0.4096	0.0016096
ENSMUSG00000079227	Ccr5	C-C motif chemokine receptor 5	0.4096	0.0090605
ENSMUSG00000064370	CYTB	cytochrome b	0.4109	0.0277385
ENSMUSG00000026395	Ptprc	protein tyrosine phosphatase receptor type C	0.416	0.0283013
ENSMUSG00000033792	Atp7a	ATPase, Cu++ transporting, alpha polypeptide	0.4181	0.0090945
ENSMUSG00000020100	Slc29a3	solute carrier family 29 (nucleoside transporters)...	0.4181	0.010844
ENSMUSG00000019295	Tmem129	transmembrane protein 129	0.4207	0.0280121
ENSMUSG00000013662	Atad1	ATPase family, AAA domain containing 1	0.421	0.0222414
ENSMUSG00000049130	C5ar1	complement component 5a receptor 1	0.4222	0.0061806
ENSMUSG00000008763	Man1a2	mannosidase, alpha, class 1A, member 2	0.436	0.0422478
ENSMUSG00000029346	Srrd	SRR1 domain containing	0.437	0.0319938
ENSMUSG00000033540	Idua	iduronidase, alpha-L	0.4392	0.01019
ENSMUSG00000064341	ND1	NADH dehydrogenase subunit 1	0.4399	0.0325392
ENSMUSG00000028232	Tmem68	transmembrane protein 68	0.4401	0.042381
ENSMUSG00000042506	Usp22	ubiquitin specific peptidase 22	0.4434	0.0344115
ENSMUSG00000035953	Pip4p1	phosphatidylinositol-4,5-bisphosphate 4-phosphatas...	0.4487	0.0467677
ENSMUSG00000031996	Aplp2	amyloid beta precursor-like protein 2	0.4526	0.0025822
ENSMUSG00000025203	Scd2	stearoyl-Coenzyme A desaturase 2	0.4539	0.0194787
ENSMUSG00000026321	Tnfrsf11a	tumor necrosis factor receptor superfamily, member...	0.456	0.0316258
ENSMUSG00000039982	Dtx4	deltex 4, E3 ubiquitin ligase	0.4573	0.001795
ENSMUSG00000045092	S1pr1	sphingosine-1-phosphate receptor 1	0.4577	0.0255415
ENSMUSG00000005506	Celf1	CUGBP, Elav-like family member 1	0.458	0.0228255
ENSMUSG00000057193	Slc44a2	solute carrier family 44, member 2	0.4615	0.0027178
ENSMUSG00000047694	Yipf6	Yip1 domain family, member 6	0.4627	0.027197
ENSMUSG00000052085	Dock8	dedicator of cytokinesis 8	0.465	0.0105552
ENSMUSG00000004880	Lbr	lamin B receptor	0.4715	0.005158
ENSMUSG00000078515	Ddi2	DNA-damage inducible protein 2	0.475	0.0334047
ENSMUSG00000098650	Commd1b	COMM domain containing 1B	0.4753	0.0182898
ENSMUSG00000053460	Ggcx	gamma-glutamyl carboxylase	0.4756	0.0141348
ENSMUSG00000033713	Foxn3	forkhead box N3	0.478	0.0226226
ENSMUSG00000041797	Abca9	ATP-binding cassette, sub-family A member 9	0.4804	0.0180695
ENSMUSG00000028467	Gba2	glucosidase beta 2	0.4836	0.0075721
ENSMUSG00000022952	Runx1	runt related transcription factor 1	0.4865	0.0246014
ENSMUSG00000029569	Tmem168	transmembrane protein 168	0.4871	0.0036552
ENSMUSG00000030256	Bhlhe41	basic helix-loop-helix family, member e41	0.4873	0.016876
ENSMUSG00000020689	Itgb3	integrin beta 3	0.4918	0.0334766
ENSMUSG00000020366	Mapk9	mitogen-activated protein kinase 9	0.492	0.0310619
ENSMUSG00000033454	Zbtb1	zinc finger and BTB domain containing 1	0.4963	0.0117563
ENSMUSG00000019873	Reep3	receptor accessory protein 3	0.4977	0.0122062
ENSMUSG00000038633	Degs1	delta 4-desaturase, sphingolipid 1	0.5019	0.0029041
ENSMUSG00000040818	Dennd6a	DENN domain containing 6A	0.5059	0.0451468
ENSMUSG00000020097	Sgpl1	sphingosine phosphate lyase 1	0.5078	0.0019199
ENSMUSG00000103749	Pcdhgb5	protocadherin gamma subfamily B, 5	0.5201	0.0443337
ENSMUSG00000024431	Nr3c1	nuclear receptor subfamily 3, group C, member 1	0.5214	0.0005456
ENSMUSG00000102440	Pcdhga9	protocadherin gamma subfamily A, 9	0.526	0.0436724
ENSMUSG00000103793	Pcdhga6	protocadherin gamma subfamily A, 6	0.5282	0.0443401
ENSMUSG00000018379	Srsf1	serine and arginine-rich splicing factor 1	0.5291	0.0316727
ENSMUSG00000033278	Ptprm	protein tyrosine phosphatase receptor type M	0.5292	0.0420549
ENSMUSG00000032220	Myo1e	myosin IE	0.5304	0.0464049
ENSMUSG00000103037	Pcdhgb1	protocadherin gamma subfamily B, 1	0.5324	0.0398154
ENSMUSG00000022125	Cln5	ceroid-lipofuscinosis, neuronal 5	0.5326	0.0140687
ENSMUSG00000028645	Slc2a1	solute carrier family 2 (facilitated glucose trans...	0.5326	0.0200009
ENSMUSG00000030557	Mef2a	myocyte enhancer factor 2A	0.5369	0.0156731
ENSMUSG00000020271	Fbxw11	F-box and WD-40 domain protein 11	0.5385	0.0233496
ENSMUSG00000103677	Pcdhga4	protocadherin gamma subfamily A, 4	0.5408	0.039
ENSMUSG00000042410	Agps	alkylglycerone phosphate synthase	0.5411	0.0164628
ENSMUSG00000022462	Slc38a2	solute carrier family 38, member 2	0.5415	0.0043464
ENSMUSG00000032902	Slc16a1	solute carrier family 16 (monocarboxylic acid tran...	0.5531	0.040476
ENSMUSG00000102748	Pcdhgb2	protocadherin gamma subfamily B, 2	0.554	0.0094858
ENSMUSG00000031555	Adam9	ADAM metallopeptidase domain 9	0.5582	0.0210954
ENSMUSG00000104063	Pcdhgb7	protocadherin gamma subfamily B, 7	0.5582	0.0301001
ENSMUSG00000032570	Atp2c1	ATPase, Ca++-sequestering	0.561	0.0430734
ENSMUSG00000022895	Ets2	E26 avian leukemia oncogene 2, 3' domain	0.5621	0.0378891
ENSMUSG00000031902	Nfatc3	nuclear factor of activated T cells, cytoplasmic, ...	0.5646	0.0423624
ENSMUSG00000001052	Sec24b	SEC24 homolog B, COPII coat complex component	0.5684	0.0075416
ENSMUSG00000037685	Atp8a1	ATPase phospholipid transporting 8A1	0.569	0.0286918
ENSMUSG00000035093	Secisbp2l	SECIS binding protein 2-like	0.5695	0.0075721
ENSMUSG00000036989	Trim3	tripartite motif-containing 3	0.5724	0.0388683
ENSMUSG00000014599	Csf1	colony stimulating factor 1 (macrophage)	0.5786	0.0225395
ENSMUSG00000025986	Slc39a10	solute carrier family 39 (zinc transporter), membe...	0.5806	0.0256283
ENSMUSG00000103567	Pcdhga5	protocadherin gamma subfamily A, 5	0.5876	0.0181835
ENSMUSG00000029208	Guf1	GUF1 homolog, GTPase	0.5914	0.0366192
ENSMUSG00000043740	Trem6l	triggering receptor expressed on myeloid cells-lik...	0.5915	0.0091279
ENSMUSG00000018481	Appbp2	amyloid beta precursor protein binding protein 2	0.592	0.0015395
ENSMUSG00000042082	Arsb	arylsulfatase B	0.5929	0.0133073
ENSMUSG00000032324	Tspan3	tetraspanin 3	0.5962	0.0142547
ENSMUSG00000020741	Cluh	clustered mitochondria homolog	0.6031	0.0018566
ENSMUSG00000033499	Larp4b	La ribonucleoprotein 4B	0.6072	0.0105372
ENSMUSG00000042323	Pbrm1	polybromo 1	0.6074	0.0042942
ENSMUSG00000031885	Cbfb	core binding factor beta	0.6096	0.0319938
ENSMUSG00000034667	Xpot	exportin, tRNA (nuclear export receptor for tRNAs)	0.6189	0.0229243
ENSMUSG00000042207	Kdm5b	lysine demethylase 5B	0.6201	0.0468003
ENSMUSG00000026365	Cfh	complement component factor h	0.6206	0.0047331
ENSMUSG00000020894	Vamp2	vesicle-associated membrane protein 2	0.6267	0.0123528
ENSMUSG00000030055	Rab43	RAB43, member RAS oncogene family	0.629	0.0087804
ENSMUSG00000078517	Emc1	ER membrane protein complex subunit 1	0.6307	0.0053961
ENSMUSG00000035954	Dock4	dedicator of cytokinesis 4	0.6379	0.0192184
ENSMUSG00000003382	Etv3	ets variant 3	0.6419	0.0077166
ENSMUSG00000005698	Ctcf	CCCTC-binding factor	0.6423	0.0328895
ENSMUSG00000048490	Nrip1	nuclear receptor interacting protein 1	0.6463	0.0042247
ENSMUSG00000021012	Zc3h14	zinc finger CCCH type containing 14	0.6465	0.0462447
ENSMUSG00000020359	Phykpl	5-phosphohydroxy-L-lysine phospholyase	0.6497	0.0029458
ENSMUSG00000025854	Fam20c	FAM20C, golgi associated secretory pathway kinase	0.6586	0.0021342
ENSMUSG00000027957	Slc35a3	solute carrier family 35 (UDP-N-acetylglucosamine ...	0.6614	0.0392702
ENSMUSG00000027109	Sp3	trans-acting transcription factor 3	0.6682	0.0084824
ENSMUSG00000031709	Tbc1d9	TBC1 domain family, member 9	0.6688	0.0285497
ENSMUSG00000021257	Angel1	angel homolog 1	0.6694	0.0105972
ENSMUSG00000037514	Pank2	pantothenate kinase 2	0.6705	0.0445268
ENSMUSG00000034908	Sidt2	SID1 transmembrane family, member 2	0.6742	0.023741
ENSMUSG00000074746	Pdzd8	PDZ domain containing 8	0.6762	0.0250565
ENSMUSG00000062762	Ei24	etoposide induced 2.4 mRNA	0.6764	0.0259464
ENSMUSG00000072501	Phf20l1	PHD finger protein 20-like 1	0.6793	0.0206086
ENSMUSG00000001761	Smo	smoothened, frizzled class receptor	0.6827	0.0116466
ENSMUSG00000029640	Usp12	ubiquitin specific peptidase 12	0.6843	0.0356951
ENSMUSG00000024855	Pacs1	phosphofurin acidic cluster sorting protein 1	0.6866	0.0400627
ENSMUSG00000025786	Zdhhc3	zinc finger, DHHC domain containing 3	0.6877	0.0353846
ENSMUSG00000043683	Fem1a	fem 1 homolog a	0.6891	0.0300341
ENSMUSG00000021000	Mia2	MIA SH3 domain ER export factor 2	0.6918	0.0034952
ENSMUSG00000037242	Clic4	chloride intracellular channel 4	0.6939	0.0278071
ENSMUSG00000078676	Casc3	exon junction complex subunit	0.6949	0.0328152
ENSMUSG00000025423	Pias2	protein inhibitor of activated STAT 2	0.7017	0.0211914
ENSMUSG00000025809	Itgb1	integrin beta 1 (fibronectin receptor beta)	0.7086	0.0099897
ENSMUSG00000014470	Rnf166	ring finger protein 166	0.7112	0.0471378
ENSMUSG00000040128	Pnrc1	proline-rich nuclear receptor coactivator 1	0.7113	0.0361396
ENSMUSG00000023307	Marchf5	membrane associated ring-CH-type finger 5	0.714	0.0170377
ENSMUSG00000031703	Itfg1	integrin alpha FG-GAP repeat containing 1	0.7149	0.0180428
ENSMUSG00000044700	Tmem201	transmembrane protein 201	0.7229	0.0330283
ENSMUSG00000032059	Alg9	ALG9 alpha-1,2-mannosyltransferase	0.7255	0.0473837
ENSMUSG00000003154	Foxj2	forkhead box J2	0.726	0.0034952
ENSMUSG00000024201	Kdm4b	lysine (K)-specific demethylase 4B	0.7284	0.0364374
ENSMUSG00000035469	Rcbtb1	regulator of chromosome condensation (RCC1) and BT...	0.7316	0.0395589
ENSMUSG00000031392	Irak1	interleukin-1 receptor-associated kinase 1	0.734	0.0498949
ENSMUSG00000000131	Xpo6	exportin 6	0.745	0.0312708
ENSMUSG00000026739	Bmi1	Bmi1 polycomb ring finger oncogene	0.7478	0.0296691
ENSMUSG00000021959	Lats2	large tumor suppressor 2	0.7528	0.0020362
ENSMUSG00000026819	Slc25a25	solute carrier family 25 (mitochondrial carrier, p...	0.7572	0.0102964
ENSMUSG00000034354	Mtmr3	myotubularin related protein 3	0.7595	0.0041102
ENSMUSG00000058886	Deaf1	DEAF1, transcription factor	0.7597	0.0436119
ENSMUSG00000027087	Itgav	integrin alpha V	0.7675	0.0009545
ENSMUSG00000032913	Lrig2	leucine-rich repeats and immunoglobulin-like domai...	0.7732	0.0050888
ENSMUSG00000028284	Map3k7	mitogen-activated protein kinase kinase kinase 7	0.7775	0.0437803
ENSMUSG00000045767	B230219D22Rik	RIKEN cDNA B230219D22 gene	0.782	0.0233386
ENSMUSG00000024213	Nudt3	nudix hydrolase 3	0.7837	0.0082449
ENSMUSG00000034807	Colgalt1	collagen beta(1-O)galactosyltransferase 1	0.7848	0.0083667
ENSMUSG00000042608	Stk40	serine/threonine kinase 40	0.7869	0.0378808
ENSMUSG00000022812	Gsk3b	glycogen synthase kinase 3 beta	0.787	0.0056484
ENSMUSG00000042364	Snx18	sorting nexin 18	0.7888	0.0455138
ENSMUSG00000015189	Casd1	CAS1 domain containing 1	0.7904	0.0074737
ENSMUSG00000036478	Btg1	BTG anti-proliferation factor 1	0.7954	0.0143399
ENSMUSG00000039942	Ptger4	prostaglandin E receptor 4 (subtype EP4)	0.7986	0.0146077
ENSMUSG00000020282	Rhbdf1	rhomboid 5 homolog 1	0.8	0.0165464
ENSMUSG00000030835	Nomo1	nodal modulator 1	0.8009	0.0111268
ENSMUSG00000032462	Pik3cb	phosphatidylinositol-4,5-bisphosphate 3-kinase cat...	0.8016	0.0053905
ENSMUSG00000038072	Galnt11	polypeptide N-acetylgalactosaminyltransferase 11	0.805	0.0192855
ENSMUSG00000025907	Rb1cc1	RB1-inducible coiled-coil 1	0.8112	0.0026576
ENSMUSG00000020773	Trim47	tripartite motif-containing 47	0.8121	0.040648
ENSMUSG00000020817	Rabep1	rabaptin, RAB GTPase binding effector protein 1	0.8122	0.0075721
ENSMUSG00000041740	Rnf10	ring finger protein 10	0.813	0.0214319
ENSMUSG00000027367	Stard7	StAR related lipid transfer domain containing 7	0.8209	0.0061291
ENSMUSG00000037905	Bri3bp	Bri3 binding protein	0.8327	0.0137931
ENSMUSG00000033161	Atp1a1	ATPase, Na+/K+ transporting, alpha 1 polypeptide	0.8345	0.0311905
ENSMUSG00000026426	Arl8a	ADP-ribosylation factor-like 8A	0.8582	0.0276451
ENSMUSG00000035311	Gnptab	N-acetylglucosamine-1-phosphate transferase, alpha...	0.8596	0.003051
ENSMUSG00000032437	Stt3b	STT3, subunit of the oligosaccharyltransferase com...	0.868	0.044101
ENSMUSG00000029221	Slc30a9	solute carrier family 30 (zinc transporter), membe...	0.8703	0.001533
ENSMUSG00000007570	Fance	Fanconi anemia, complementation group E	0.8869	0.0341155
ENSMUSG00000033166	Dis3	DIS3 homolog, exosome endoribonuclease and 3'-5' e...	0.8879	0.0418753
ENSMUSG00000014771	Pdcd2	programmed cell death 2	0.8906	0.0392131
ENSMUSG00000032624	Eml4	echinoderm microtubule associated protein like 4	0.8912	0.0014354
ENSMUSG00000017417	Plxdc1	plexin domain containing 1	0.8912	0.0463396
ENSMUSG00000029033	Acap3	ArfGAP with coiled-coil, ankyrin repeat and PH dom...	0.8935	0.010673
ENSMUSG00000026821	Ralgds	ral guanine nucleotide dissociation stimulator	0.8989	0.0329398
ENSMUSG00000049339	Retreg2	reticulophagy regulator family member 2	0.9023	0.0053441
ENSMUSG00000063358	Mapk1	mitogen-activated protein kinase 1	0.9026	0.0051413
ENSMUSG00000060181	Slc35e3	solute carrier family 35, member E3	0.9054	0.0181835
ENSMUSG00000034487	Poglut3	protein O-glucosyltransferase 3	0.9093	0.0165682
ENSMUSG00000040102	Klhl42	kelch-like 42	0.91	0.0179458
ENSMUSG00000031065	Cdk16	cyclin dependent kinase 16	0.9133	0.003051
ENSMUSG00000040151	Hs2st1	heparan sulfate 2-O-sulfotransferase 1	0.9135	0.0153948
ENSMUSG00000029229	Chic2	cysteine-rich hydrophobic domain 2	0.9155	0.0266257
ENSMUSG00000026499	Acbd3	acyl-Coenzyme A binding domain containing 3	0.9191	0.0056723
ENSMUSG00000035891	Cerk	ceramide kinase	0.9249	0.0086233
ENSMUSG00000032849	Abcc4	ATP-binding cassette, sub-family C member 4	0.9269	0.0195447
ENSMUSG00000011831	Evi5	ecotropic viral integration site 5	0.9273	0.0030702
ENSMUSG00000039662	Icmt	isoprenylcysteine carboxyl methyltransferase	0.9289	0.0016557
ENSMUSG00000074238	Ap1ar	adaptor-related protein complex 1 associated regul...	0.9297	0.0317122
ENSMUSG00000061979	Rcc1l	reculator of chromosome condensation 1 like	0.9311	0.0115859
ENSMUSG00000024601	Isoc1	isochorismatase domain containing 1	0.9321	0.01847
ENSMUSG00000006526	Stimate	STIM activating enhancer	0.9324	0.003973
ENSMUSG00000002897	Il17ra	interleukin 17 receptor A	0.9373	0.0393937
ENSMUSG00000035529	Prdm4	PR domain containing 4	0.9417	0.0059595
ENSMUSG00000039244	Ints15	integrator complex subunit 15	0.9441	0.0064565
ENSMUSG00000027829	Ccnl1	cyclin L1	0.9442	0.0016096
ENSMUSG00000015214	Mtmr1	myotubularin related protein 1	0.948	0.0040897
ENSMUSG00000062203	Gspt1	G1 to S phase transition 1	0.9487	0.007437
ENSMUSG00000031681	Smad1	SMAD family member 1	0.955	0.0143949
ENSMUSG00000038697	Taf5l	TATA-box binding protein associated factor 5 like	0.9559	0.0037004
ENSMUSG00000043664	Tmem221	transmembrane protein 221	0.9605	0.0412683
ENSMUSG00000034761	Map4k5	mitogen-activated protein kinase kinase kinase kin...	0.9646	0.0089474
ENSMUSG00000047959	Kcna3	potassium voltage-gated channel, shaker-related su...	0.965	0.0280602
ENSMUSG00000024527	Afg3l2	AFG3-like AAA ATPase 2	0.9689	0.0135827
ENSMUSG00000019961	Tmpo	thymopoietin	0.9724	0.0045128
ENSMUSG00000041408	Wapl	WAPL cohesin release factor	0.9726	0.0006668
ENSMUSG00000031862	Atp13a1	ATPase type 13A1	0.9731	0.0455138
ENSMUSG00000039630	Hnrnpu	heterogeneous nuclear ribonucleoprotein U	0.9736	0.0286088
ENSMUSG00000022742	Cpox	coproporphyrinogen oxidase	0.9745	0.0418753
ENSMUSG00000003135	Cnot11	CCR4-NOT transcription complex, subunit 11	0.9799	0.0239996
ENSMUSG00000040234	Tm7sf3	transmembrane 7 superfamily member 3	0.9835	0.0037074
ENSMUSG00000049940	Pgrmc2	progesterone receptor membrane component 2	0.9849	0.0085004
ENSMUSG00000026082	Rev1	REV1, DNA directed polymerase	0.9894	0.001795
ENSMUSG00000039703	Nploc4	NPL4 homolog, ubiquitin recognition factor	0.9897	0.0190111
ENSMUSG00000038822	Hace1	HECT domain and ankyrin repeat containing, E3 ubiq...	0.9916	0.0195447
ENSMUSG00000030265	Kras	Kirsten rat sarcoma viral oncogene homolog	0.9957	0.010553
ENSMUSG00000050912	Tmem123	transmembrane protein 123	0.9976	0.047173
ENSMUSG00000024896	Minpp1	multiple inositol polyphosphate histidine phosphat...	1.002	0.0420442
ENSMUSG00000025050	Pcgf6	polycomb group ring finger 6	1.003	0.0280786
ENSMUSG00000036339	Tmem260	transmembrane protein 260	1.006	0.0033262
ENSMUSG00000095567	Noc2l	NOC2 like nucleolar associated transcriptional rep...	1.009	0.0116642
ENSMUSG00000020361	Hspa4	heat shock protein 4	1.017	0.0434005
ENSMUSG00000005973	Rcn1	reticulocalbin 1	1.023	0.0111406
ENSMUSG00000026064	Ptp4a1	protein tyrosine phosphatase 4a1	1.025	0.0010591
ENSMUSG00000022498	Txndc11	thioredoxin domain containing 11	1.03	0.0051337
ENSMUSG00000001918	Slc1a5	solute carrier family 1 (neutral amino acid transp...	1.033	0.0487344
ENSMUSG00000017776	Crk	v-crk avian sarcoma virus CT10 oncogene homolog	1.036	0.0109227
ENSMUSG00000041846	Ppp4r3a	protein phosphatase 4 regulatory subunit 3A	1.042	0.0061291
ENSMUSG00000021133	Susd6	sushi domain containing 6	1.046	0.0080307
ENSMUSG00000039952	Dag1	dystroglycan 1	1.049	0.0018814
ENSMUSG00000020520	Galnt10	polypeptide N-acetylgalactosaminyltransferase 10	1.051	0.0056397
ENSMUSG00000030704	Rab6a	RAB6A, member RAS oncogene family	1.051	0.0344311
ENSMUSG00000061130	Ppm1b	protein phosphatase 1B, magnesium dependent, beta ...	1.055	0.0077035
ENSMUSG00000061718	Ppp1r1b	protein phosphatase 1, regulatory inhibitor subuni...	1.055	0.0326803
ENSMUSG00000029501	Ankle2	ankyrin repeat and LEM domain containing 2	1.057	0.0081362
ENSMUSG00000071253	Slc25a16	solute carrier family 25 (mitochondrial carrier, G...	1.058	0.0304993
ENSMUSG00000028700	Pomgnt1	protein O-linked mannose beta 1,2-N-acetylglucosam...	1.062	0.0092195
ENSMUSG00000044030	Irf2bp1	interferon regulatory factor 2 binding protein 1	1.066	0.0316038
ENSMUSG00000025858	Get4	golgi to ER traffic protein 4	1.066	0.0357224
ENSMUSG00000078619	Smarcd2	SWI/SNF related, matrix associated, actin dependen...	1.071	0.0451958
ENSMUSG00000021973	Micu2	mitochondrial calcium uptake 2	1.072	0.0179324
ENSMUSG00000029178	Klf3	Kruppel-like transcription factor 3 (basic)	1.074	0.0108414
ENSMUSG00000039725	Trp53rka	transformation related protein 53 regulating kinas...	1.08	0.0452147
ENSMUSG00000066595	Flvcr1	feline leukemia virus subgroup C cellular receptor...	1.081	0.0126829
ENSMUSG00000031823	Zdhhc7	zinc finger, DHHC domain containing 7	1.082	0.0332465
ENSMUSG00000031934	Panx1	pannexin 1	1.083	0.0170955
ENSMUSG00000049686	Orai1	ORAI calcium release-activated calcium modulator 1	1.084	0.0284982
ENSMUSG00000019861	Gopc	golgi associated PDZ and coiled-coil motif contain...	1.085	0.0089933
ENSMUSG00000030282	Cmas	cytidine monophospho-N-acetylneuraminic acid synth...	1.086	0.0297532
ENSMUSG00000031352	Hccs	holocytochrome c synthetase	1.09	0.0047437
ENSMUSG00000052681	Rap1b	RAS related protein 1b	1.095	0.0138392
ENSMUSG00000027677	Ttc14	tetratricopeptide repeat domain 14	1.101	0.0027178
ENSMUSG00000053094	Tmem248	transmembrane protein 248	1.104	0.0029906
ENSMUSG00000021629	Slc30a5	solute carrier family 30 (zinc transporter), membe...	1.109	0.0238559
ENSMUSG00000051650	B3gnt2	UDP-GlcNAc:betaGal beta-1,3-N-acetylglucosaminyltr...	1.111	0.0049404
ENSMUSG00000021326	Trim27	tripartite motif-containing 27	1.119	0.0135338
ENSMUSG00000021171	Esyt2	extended synaptotagmin-like protein 2	1.12	0.0021644
ENSMUSG00000039774	Galnt12	polypeptide N-acetylgalactosaminyltransferase 12	1.127	0.0220688
ENSMUSG00000030505	Prmt3	protein arginine N-methyltransferase 3	1.13	0.0059514
ENSMUSG00000046985	Tapt1	transmembrane anterior posterior transformation 1	1.13	0.0069706
ENSMUSG00000021054	Sgpp1	sphingosine-1-phosphate phosphatase 1	1.133	0.0135179
ENSMUSG00000021681	Aggf1	angiogenic factor with G patch and FHA domains 1	1.134	0.0100015
ENSMUSG00000029598	Plbd2	phospholipase B domain containing 2	1.135	0.0361168
ENSMUSG00000004591	Pkn2	protein kinase N2	1.141	0.0024846
ENSMUSG00000034707	Gns	glucosamine (N-acetyl)-6-sulfatase	1.141	0.0054577
ENSMUSG00000046229	Scand1	SCAN domain-containing 1	1.141	0.0198942
ENSMUSG00000025236	Adpgk	ADP-dependent glucokinase	1.142	0.0406618
ENSMUSG00000029390	Tmed2	transmembrane p24 trafficking protein 2	1.144	0.0195973
ENSMUSG00000032320	Rcn2	reticulocalbin 2	1.144	0.04922
ENSMUSG00000020482	Ccdc117	coiled-coil domain containing 117	1.153	0.0286654
ENSMUSG00000021200	Asb2	ankyrin repeat and SOCS box-containing 2	1.154	0.015214
ENSMUSG00000038212	Mfsd14b	major facilitator superfamily domain containing 14...	1.155	0.0119982
ENSMUSG00000046410	Kcnk6	potassium inwardly-rectifying channel, subfamily K...	1.159	0.0058329
ENSMUSG00000004455	Ppp1cc	protein phosphatase 1 catalytic subunit gamma	1.16	0.0077035
ENSMUSG00000019189	Rnf145	ring finger protein 145	1.162	0.0077035
ENSMUSG00000017831	Rab5a	RAB5A, member RAS oncogene family	1.163	0.0366245
ENSMUSG00000036087	Slain2	SLAIN motif family, member 2	1.165	0.0019106
ENSMUSG00000022200	Golph3	golgi phosphoprotein 3	1.173	0.0023122
ENSMUSG00000001157	Gmcl1	germ cell-less, spermatogenesis associated 1	1.18	0.0295787
ENSMUSG00000049999	Ppp1r3d	protein phosphatase 1, regulatory subunit 3D	1.193	0.0360145
ENSMUSG00000056708	Ier5	immediate early response 5	1.197	0.0211405
ENSMUSG00000027860	Vangl1	VANGL planar cell polarity 1	1.2	0.0261958
ENSMUSG00000042854	Trp53rkb	transformation related protein 53 regulating kinas...	1.203	0.0483914
ENSMUSG00000032370	Lactb	lactamase, beta	1.205	0.0176151
ENSMUSG00000020134	Peli1	pellino 1	1.21	0.0060152
ENSMUSG00000035828	Pim3	proviral integration site 3	1.21	0.0142455
ENSMUSG00000030104	Edem1	ER degradation enhancer, mannosidase alpha-like 1	1.213	0.0013564
ENSMUSG00000040918	Slc19a2	solute carrier family 19 (thiamine transporter), m...	1.214	0.0113314
ENSMUSG00000022175	Lrp10	low-density lipoprotein receptor-related protein 1...	1.218	0.0086233
ENSMUSG00000040396	Abhd13	abhydrolase domain containing 13	1.222	0.010844
ENSMUSG00000028756	Pink1	PTEN induced putative kinase 1	1.223	0.030969
ENSMUSG00000006169	Clint1	clathrin interactor 1	1.225	0.0045904
ENSMUSG00000029416	Slc15a4	solute carrier family 15, member 4	1.23	0.0070787
ENSMUSG00000052253	Zfp622	zinc finger protein 622	1.23	0.0098667
ENSMUSG00000003746	Man1a	mannosidase 1, alpha	1.231	0.0065268
ENSMUSG00000090213	Peds1	plasmanylethanolamine desaturase 1	1.239	0.0026576
ENSMUSG00000024091	Vapa	vesicle-associated membrane protein, associated pr...	1.243	0.0430922
ENSMUSG00000029772	Ahcyl2	S-adenosylhomocysteine hydrolase-like 2	1.247	0.0004395
ENSMUSG00000022792	Yars2	tyrosyl-tRNA synthetase 2 (mitochondrial)	1.247	0.0025116
ENSMUSG00000031671	Setd6	SET domain containing 6	1.247	0.016809
ENSMUSG00000047187	Rab2a	RAB2A, member RAS oncogene family	1.256	0.0320117
ENSMUSG00000050796	B3galt6	UDP-Gal:betaGal beta 1,3-galactosyltransferase, po...	1.259	0.0054828
ENSMUSG00000021400	Wrnip1	Werner helicase interacting protein 1	1.263	0.0145753
ENSMUSG00000043019	Edem3	ER degradation enhancer, mannosidase alpha-like 3	1.273	0.0006964
ENSMUSG00000020358	Hnrnpab	heterogeneous nuclear ribonucleoprotein A/B	1.276	0.008175
ENSMUSG00000036327	Qsox2	quiescin Q6 sulfhydryl oxidase 2	1.291	0.0124417
ENSMUSG00000028560	Usp1	ubiquitin specific peptidase 1	1.292	0.0011132
ENSMUSG00000040659	Efhd2	EF hand domain containing 2	1.295	0.0077166
ENSMUSG00000005312	Ubqln1	ubiquilin 1	1.296	0.011115
ENSMUSG00000036955	Kifbp	kinesin family binding protein	1.296	0.0272919
ENSMUSG00000025016	Tm9sf3	transmembrane 9 superfamily member 3	1.305	0.0024846
ENSMUSG00000053175	Bcl3	B cell leukemia/lymphoma 3	1.306	0.0067094
ENSMUSG00000032997	Chpf	chondroitin polymerizing factor	1.313	0.0165705
ENSMUSG00000024790	Sac3d1	SAC3 domain containing 1	1.315	0.0074737
ENSMUSG00000027637	Rab5if	RAB5 interacting factor	1.328	0.0430216
ENSMUSG00000026437	Cdk18	cyclin dependent kinase 18	1.329	0.0080642
ENSMUSG00000031438	Rnf128	ring finger protein 128	1.34	0.0302245
ENSMUSG00000038991	Txndc5	thioredoxin domain containing 5	1.343	0.0118626
ENSMUSG00000032431	Crtap	cartilage associated protein	1.346	0.0081284
ENSMUSG00000034789	Rab24	RAB24, member RAS oncogene family	1.353	0.0320117
ENSMUSG00000021102	Glrx5	glutaredoxin 5	1.362	0.0355495
ENSMUSG00000040010	Slc7a5	solute carrier family 7 (cationic amino acid trans...	1.366	0.0016028
ENSMUSG00000006651	Aplp1	amyloid beta precursor like protein 1	1.368	0.043251
ENSMUSG00000020038	Cry1	cryptochrome circadian regulator 1	1.376	0.0124159
ENSMUSG00000039323	Igfbp2	insulin-like growth factor binding protein 2	1.377	0.0323957
ENSMUSG00000071076	Jund	jun D proto-oncogene	1.4	0.0430839
ENSMUSG00000002393	Nr2f6	nuclear receptor subfamily 2, group F, member 6	1.41	0.0135212
ENSMUSG00000037643	Prkci	protein kinase C, iota	1.42	0.0014218
ENSMUSG00000036615	Rfxap	regulatory factor X-associated protein	1.455	0.0446675
ENSMUSG00000024978	Gpam	glycerol-3-phosphate acyltransferase, mitochondria...	1.458	0.0012173
ENSMUSG00000061808	Ttr	transthyretin	1.46	0.0201899
ENSMUSG00000050930	Map10	microtubule-associated protein 10	1.481	0.0281716
ENSMUSG00000038594	Cep85l	centrosomal protein 85-like	1.503	0.0027949
ENSMUSG00000043445	Pgp	phosphoglycolate phosphatase	1.51	0.023741
ENSMUSG00000019158	Tmem160	transmembrane protein 160	1.523	0.0418753
ENSMUSG00000061024	Rrs1	ribosome biogenesis regulator 1	1.567	0.0095529
ENSMUSG00000022949	Clic6	chloride intracellular channel 6	1.829	0.0039504
ENSMUSG00000022425	Enpp2	ectonucleotide pyrophosphatase/phosphodiesterase 2	1.912	0.008677
ENSMUSG00000058488	Kl	klotho	1.931	0.0058187
ENSMUSG00000036622	Atp13a2	ATPase type 13A2	0.8722	0.0500909
ENSMUSG00000025579	Gaa	glucosidase, alpha, acid	0.2358	0.0505297
ENSMUSG00000025158	Rfng	RFNG O-fucosylpeptide 3-beta-N-acetylglucosaminylt...	1.135	0.0506138
ENSMUSG00000039357	Fut11	fucosyltransferase 11	1.436	0.0507029
ENSMUSG00000102222	Pcdhga10	protocadherin gamma subfamily A, 10	0.5299	0.0507852
ENSMUSG00000021427	Ssr1	signal sequence receptor, alpha	0.24	0.0507852
ENSMUSG00000022365	Derl1	Der1-like domain family, member 1	0.1681	0.0507852
ENSMUSG00000095432	Zfp748	zinc finger protein 748	0.5358	0.0508915
ENSMUSG00000030870	Ubfd1	ubiquitin family domain containing 1	0.6558	0.0510055
ENSMUSG00000032373	Car12	carbonic anhydrase 12	1.52	0.0512425
ENSMUSG00000032485	Scap	SREBF chaperone	0.4804	0.0512425
ENSMUSG00000001440	Kpnb1	karyopherin subunit beta 1	-0.4617	0.0512425
ENSMUSG00000041695	Kcnj2	potassium inwardly-rectifying channel, subfamily J...	0.7265	0.0515176
ENSMUSG00000039497	Dse	dermatan sulfate epimerase	0.4469	0.0521685
ENSMUSG00000097411	B430218F22Rik	RIKEN cDNA B430218F22 gene	1.348	0.0522537
ENSMUSG00000040331	Nsmce4a	NSE4 homolog A, SMC5-SMC6 complex component	1.164	0.052591
ENSMUSG00000046791	Riox1	ribosomal oxygenase 1	1.157	0.052591
ENSMUSG00000103585	Pcdhgb4	protocadherin gamma subfamily B, 4	0.4576	0.0529912
ENSMUSG00000031824	6430548M08Rik	RIKEN cDNA 6430548M08 gene	0.774	0.0531249
ENSMUSG00000103897	Pcdhga8	protocadherin gamma subfamily A, 8	0.4941	0.0531249
ENSMUSG00000032328	Tmem30a	transmembrane protein 30A	0.2943	0.053674
ENSMUSG00000027636	Sla2	Src-like-adaptor 2	1.226	0.0539266
ENSMUSG00000039308	Ndst2	N-deacetylase/N-sulfotransferase (heparan glucosam...	0.5677	0.0539266
ENSMUSG00000040028	Elavl1	ELAV like RNA binding protein 1	0.8421	0.053993
ENSMUSG00000104346	Pcdhga3	protocadherin gamma subfamily A, 3	0.5177	0.0542318
ENSMUSG00000060708	Bloc1s4	biogenesis of lysosomal organelles complex-1, subu...	1.346	0.0543471
ENSMUSG00000027514	Zbp1	Z-DNA binding protein 1	-0.8814	0.0545504
ENSMUSG00000022037	Clu	clusterin	1.038	0.0546057
ENSMUSG00000026970	Rbms1	RNA binding motif, single stranded interacting pro...	0.7545	0.0546709
ENSMUSG00000007880	Arid1a	AT-rich interaction domain 1A	-0.4127	0.0547394
ENSMUSG00000029004	Kmt2e	lysine (K)-specific methyltransferase 2E	-0.3534	0.0547394
ENSMUSG00000048920	Fkrp	fukutin related protein	0.7569	0.0548251
ENSMUSG00000029174	Tbc1d1	TBC1 domain family, member 1	0.455	0.0548251
ENSMUSG00000032555	Topbp1	topoisomerase (DNA) II binding protein 1	0.6537	0.0550902
ENSMUSG00000021670	Hmgcr	3-hydroxy-3-methylglutaryl-Coenzyme A reductase	0.4881	0.0553428
ENSMUSG00000102742	Pcdhga11	protocadherin gamma subfamily A, 11	0.5109	0.0556719
ENSMUSG00000031451	Gas6	growth arrest specific 6	0.9338	0.0562233
ENSMUSG00000038418	Egr1	early growth response 1	0.8946	0.0562233
ENSMUSG00000036438	Calm2	calmodulin 2	-0.2595	0.0562233
ENSMUSG00000034854	Mfsd12	major facilitator superfamily domain containing 12	0.7458	0.0563156
ENSMUSG00000080058	Gm11175	predicted gene 11175	1.478	0.056647
ENSMUSG00000019777	Hdac2	histone deacetylase 2	1.115	0.056647
ENSMUSG00000028207	Asph	aspartate-beta-hydroxylase	0.2784	0.0569901
ENSMUSG00000022199	Slc22a17	solute carrier family 22 (organic cation transport...	0.6799	0.0570597
ENSMUSG00000031609	Sap30	sin3 associated polypeptide	1.152	0.0570639
ENSMUSG00000033285	Wdr3	WD repeat domain 3	0.329	0.0571966
ENSMUSG00000040451	Sgms1	sphingomyelin synthase 1	0.4906	0.0572835
ENSMUSG00000046027	Stard5	StAR related lipid transfer domain containing 5	-0.3466	0.0572835
ENSMUSG00000029616	Erp29	endoplasmic reticulum protein 29	-0.2603	0.0572835
ENSMUSG00000020253	Ppm1m	protein phosphatase 1M	0.7313	0.0585526
ENSMUSG00000022507	Hapstr1	HUWE1 associated protein modifying stress response...	0.6662	0.0585874
ENSMUSG00000025199	Chuk	conserved helix-loop-helix ubiquitous kinase	0.5203	0.0586693
ENSMUSG00000032285	Dnaja4	DnaJ heat shock protein family (Hsp40) member A4	0.9695	0.0590821
ENSMUSG00000021731	Mrps30	mitochondrial ribosomal protein S30	1.302	0.0591633
ENSMUSG00000060671	Atp8b2	ATPase, class I, type 8B, member 2	0.7482	0.0598557
ENSMUSG00000006442	Srm	spermidine synthase	1.09	0.0601827
ENSMUSG00000012126	Ubxn11	UBX domain protein 11	-0.3881	0.0602073
ENSMUSG00000048970	C1galt1c1	C1GALT1-specific chaperone 1	0.3718	0.0602073
ENSMUSG00000031483	Erlin2	ER lipid raft associated 2	0.2594	0.0602459
ENSMUSG00000061132	Blnk	B cell linker	-0.3189	0.0603473
ENSMUSG00000048429	Timm29	translocase of inner mitochondrial membrane 29	0.9851	0.0605757
ENSMUSG00000024661	Fth1	ferritin heavy polypeptide 1	-0.428	0.0606811
ENSMUSG00000067274	Rplp0	ribosomal protein lateral stalk subunit P0	-0.325	0.0606811
ENSMUSG00000027562	Car2	carbonic anhydrase 2	1.273	0.0606832
ENSMUSG00000031207	Msn	moesin	0.1611	0.0607927
ENSMUSG00000040990	Sh3kbp1	SH3-domain kinase binding protein 1	0.451	0.0610313
ENSMUSG00000046756	Mrps7	mitchondrial ribosomal protein S7	-0.437	0.0610528
ENSMUSG00000009293	Ube2g2	ubiquitin-conjugating enzyme E2G 2	-0.3609	0.0610841
ENSMUSG00000033732	Sf3b3	splicing factor 3b, subunit 3	0.2174	0.0610841
ENSMUSG00000021639	Gtf2h2	general transcription factor II H, polypeptide 2	-0.2915	0.0611921
ENSMUSG00000022841	Ap2m1	adaptor-related protein complex 2, mu 1 subunit	-0.2799	0.0611921
ENSMUSG00000032035	Ets1	E26 avian leukemia oncogene 1, 5' domain	0.3161	0.0612646
ENSMUSG00000001227	Sema6b	sema domain, transmembrane domain (TM), and cytopl...	1.047	0.0613078
ENSMUSG00000047379	B4gat1	beta-1,4-glucuronyltransferase 1	0.323	0.0614535
ENSMUSG00000025544	Tm9sf2	transmembrane 9 superfamily member 2	0.4215	0.0616687
ENSMUSG00000001436	Slc19a1	solute carrier family 19 (folate transporter), mem...	0.3438	0.0617152
ENSMUSG00000022150	Dab2	disabled 2, mitogen-responsive phosphoprotein	0.4353	0.0620743
ENSMUSG00000022094	Slc39a14	solute carrier family 39 (zinc transporter), membe...	0.4247	0.0623199
ENSMUSG00000008429	Herpud2	HERPUD family member 2	1.001	0.0625107
ENSMUSG00000045672	Col27a1	collagen, type XXVII, alpha 1	-0.5948	0.0630805
ENSMUSG00000102543	Pcdhgc5	protocadherin gamma subfamily C, 5	0.5116	0.06312
ENSMUSG00000028478	Clta	clathrin light chain A	-0.3269	0.063514
ENSMUSG00000000838	Fmr1	fragile X messenger ribonucleoprotein 1	0.6637	0.0636751
ENSMUSG00000019943	Atp2b1	ATPase, Ca++ transporting, plasma membrane 1	0.2976	0.0636751
ENSMUSG00000032698	Lmo2	LIM domain only 2	0.697	0.0636801
ENSMUSG00000017830	Dhx58	DExH-box helicase 58	-0.5584	0.0638629
ENSMUSG00000046711	Hmga1	high mobility group AT-hook 1	0.5557	0.0638629
ENSMUSG00000024397	Aif1	allograft inflammatory factor 1	-0.4415	0.0641492
ENSMUSG00000016534	Lamp2	lysosomal-associated membrane protein 2	0.175	0.0642816
ENSMUSG00000023068	Nus1	NUS1 dehydrodolichyl diphosphate synthase subunit	0.5782	0.0643109
ENSMUSG00000036501	Fam13b	family with sequence similarity 13, member B	0.5724	0.0644089
ENSMUSG00000015002	Efr3a	EFR3 homolog A	0.4095	0.0644089
ENSMUSG00000048755	Mcat	malonyl CoA:ACP acyltransferase (mitochondrial)	0.9238	0.0648576
ENSMUSG00000018446	C1qbp	complement component 1, q subcomponent binding pro...	1.165	0.0649063
ENSMUSG00000044197	Gpr146	G protein-coupled receptor 146	0.5646	0.0653324
ENSMUSG00000033769	Exoc6b	exocyst complex component 6B	0.4175	0.0653754
ENSMUSG00000053819	Camk2d	calcium/calmodulin-dependent protein kinase II, de...	0.6138	0.0654437
ENSMUSG00000034459	Ifit1	interferon-induced protein with tetratricopeptide ...	-0.7531	0.0657651
ENSMUSG00000022051	Bnip3l	BCL2/adenovirus E1B interacting protein 3-like	-0.3685	0.066581
ENSMUSG00000034189	Hsdl1	hydroxysteroid dehydrogenase like 1	0.2738	0.066581
ENSMUSG00000056749	Nfil3	nuclear factor, interleukin 3, regulated	0.9393	0.0667452
ENSMUSG00000021969	Zdhhc20	zinc finger, DHHC domain containing 20	0.2904	0.0667452
ENSMUSG00000017781	Pitpna	phosphatidylinositol transfer protein, alpha	0.9364	0.0668879
ENSMUSG00000022184	Fbxo4	F-box protein 4	0.7979	0.0676288
ENSMUSG00000038412	Higd1a	HIG1 domain family, member 1A	0.5285	0.0677044
ENSMUSG00000020869	Lrrc59	leucine rich repeat containing 59	0.8591	0.0678241
ENSMUSG00000063605	Ccdc102a	coiled-coil domain containing 102A	0.9337	0.0679321
ENSMUSG00000037300	Ttc13	tetratricopeptide repeat domain 13	0.8208	0.0680247
ENSMUSG00000023036	Pcdhgc4	protocadherin gamma subfamily C, 4	0.477	0.0683032
ENSMUSG00000018920	Cxcl16	C-X-C motif chemokine ligand 16	-0.44	0.0687193
ENSMUSG00000068290	Ddrgk1	DDRGK domain containing 1	-0.3533	0.0691341
ENSMUSG00000002325	Irf9	interferon regulatory factor 9	-0.3401	0.0692353
ENSMUSG00000029162	Khk	ketohexokinase	-0.4581	0.0692884
ENSMUSG00000029468	P2rx7	purinergic receptor P2X, ligand-gated ion channel,...	0.2334	0.0693869
ENSMUSG00000004296	Il12b	interleukin 12b	-1.43	0.0695771
ENSMUSG00000063550	Nup98	nucleoporin 98	0.539	0.0697896
ENSMUSG00000039208	Metrnl	meteorin, glial cell differentiation regulator-lik...	1.064	0.0699476
ENSMUSG00000002365	Snx9	sorting nexin 9	0.8386	0.0699476
ENSMUSG00000028982	Slc25a33	solute carrier family 25, member 33	1.043	0.0699997
ENSMUSG00000039068	Zzz3	zinc finger, ZZ domain containing 3	0.4976	0.0699997
ENSMUSG00000028416	Bag1	BCL2-associated athanogene 1	1.203	0.0702662
ENSMUSG00000041702	Btbd7	BTB domain containing 7	0.8585	0.0703941
ENSMUSG00000031467	Agpat5	1-acylglycerol-3-phosphate O-acyltransferase 5	0.4222	0.0703941
ENSMUSG00000102918	Pcdhgc3	protocadherin gamma subfamily C, 3	0.5198	0.0705385
ENSMUSG00000024054	Smchd1	SMC hinge domain containing 1	0.4865	0.0706564
ENSMUSG00000030737	Slco2b1	solute carrier organic anion transporter family, m...	0.1262	0.071079
ENSMUSG00000028948	Nol9	nucleolar protein 9	0.6375	0.0713396
ENSMUSG00000032288	Imp3	IMP3, U3 small nucleolar ribonucleoprotein	0.7904	0.0714321
ENSMUSG00000035478	Mbd3	methyl-CpG binding domain protein 3	0.6797	0.0714321
ENSMUSG00000040829	Zmynd15	zinc finger, MYND-type containing 15	-0.4566	0.0714648
ENSMUSG00000027999	Pla2g12a	phospholipase A2, group XIIA	1.132	0.0721698
ENSMUSG00000026820	Ptges2	prostaglandin E synthase 2	1.281	0.0723156
ENSMUSG00000049969	Plekhf2	pleckstrin homology domain containing, family F (w...	0.9204	0.0726584
ENSMUSG00000028646	Rragc	Ras-related GTP binding C	0.6042	0.0726584
ENSMUSG00000020681	Ace	angiotensin I converting enzyme	1.227	0.0729704
ENSMUSG00000022043	Trim35	tripartite motif-containing 35	0.2907	0.0729704
ENSMUSG00000041762	Gpr155	G protein-coupled receptor 155	0.2786	0.0729704
ENSMUSG00000096764	Slc12a6	solute carrier family 12, member 6	0.3784	0.0732344
ENSMUSG00000057469	E2f6	E2F transcription factor 6	1.114	0.073826
ENSMUSG00000024614	Tmx3	thioredoxin-related transmembrane protein 3	0.4393	0.074093
ENSMUSG00000021451	Sema4d	sema domain, immunoglobulin domain (Ig), transmemb...	0.2568	0.0741292
ENSMUSG00000045975	C2cd2	C2 calcium-dependent domain containing 2	0.7605	0.074214
ENSMUSG00000023915	Tnfrsf21	tumor necrosis factor receptor superfamily, member...	0.8434	0.0745655
ENSMUSG00000024885	Aldh3b1	aldehyde dehydrogenase 3 family, member B1	-0.4085	0.0749121
ENSMUSG00000038280	Ostm1	osteopetrosis associated transmembrane protein 1	0.3977	0.0749121
ENSMUSG00000037824	Tspan14	tetraspanin 14	0.1704	0.0754911
ENSMUSG00000103332	Pcdhga2	protocadherin gamma subfamily A, 2	0.4748	0.0756459
ENSMUSG00000035242	Oaz1	ornithine decarboxylase antizyme 1	-0.3	0.0756459
ENSMUSG00000026480	Ncf2	neutrophil cytosolic factor 2	-0.2706	0.0756459
ENSMUSG00000097061	9330151L19Rik	RIKEN cDNA 9330151L19 gene	1.044	0.0757926
ENSMUSG00000027163	Commd9	COMM domain containing 9	-0.4106	0.0758251
ENSMUSG00000006301	Tmbim1	transmembrane BAX inhibitor motif containing 1	0.2478	0.0758251
ENSMUSG00000042997	Nhlrc3	NHL repeat containing 3	0.3836	0.0760516
ENSMUSG00000037373	Ctbp1	C-terminal binding protein 1	0.843	0.076577
ENSMUSG00000070291	Ddx43	DEAD box helicase 43	0.9457	0.0766343
ENSMUSG00000031918	Mtmr2	myotubularin related protein 2	0.5685	0.0766458
ENSMUSG00000037260	Hgsnat	heparan-alpha-glucosaminide N-acetyltransferase	0.9389	0.0773735
ENSMUSG00000025730	Rab40c	Rab40C, member RAS oncogene family	0.4986	0.0776968
ENSMUSG00000035713	Usp35	ubiquitin specific peptidase 35	-0.6641	0.0783952
ENSMUSG00000066568	Lsm14a	LSM14A mRNA processing body assembly factor	0.6737	0.0784931
ENSMUSG00000029030	Tprg1l	transformation related protein 63 regulated 1 like	1.18	0.0787354
ENSMUSG00000027660	Skil	SKI-like	0.3468	0.0787722
ENSMUSG00000022671	Mzt2	mitotic spindle organizing protein 2	-0.4999	0.078884
ENSMUSG00000033228	Scaf11	SR-related CTD-associated factor 11	0.4399	0.0791152
ENSMUSG00000025410	Dctn2	dynactin 2	-0.2968	0.0791152
ENSMUSG00000037419	Endod1	endonuclease domain containing 1	0.6426	0.0791302
ENSMUSG00000037405	Icam1	intercellular adhesion molecule 1	0.1936	0.07929
ENSMUSG00000022180	Slc7a8	solute carrier family 7 (cationic amino acid trans...	0.2328	0.0794486
ENSMUSG00000063656	Gm10135	predicted gene 10135	1.058	0.0796083
ENSMUSG00000024308	Tapbp	TAP binding protein	0.12	0.0801636
ENSMUSG00000060279	Ap2a1	adaptor-related protein complex 2, alpha 1 subunit	0.3995	0.0801678
ENSMUSG00000029234	Tmem165	transmembrane protein 165	1.092	0.0807709
ENSMUSG00000032122	Slc37a2	solute carrier family 37 (glycerol-3-phosphate tra...	0.2262	0.0820644
ENSMUSG00000025044	Msr1	macrophage scavenger receptor 1	0.5252	0.0824241
ENSMUSG00000023004	Tuba1b	tubulin, alpha 1B	-0.2714	0.0824241
ENSMUSG00000052934	Fbxo31	F-box protein 31	0.7916	0.0824614
ENSMUSG00000021993	Mipep	mitochondrial intermediate peptidase	0.8342	0.0827122
ENSMUSG00000059851	Kmt5c	lysine methyltransferase 5C	-0.5248	0.0831429
ENSMUSG00000031210	Gpr165	G protein-coupled receptor 165	0.7515	0.0833316
ENSMUSG00000074361	C5ar2	complement component 5a receptor 2	0.408	0.0833316
ENSMUSG00000021831	Ero1a	endoplasmic reticulum oxidoreductase 1 alpha	0.7142	0.0834008
ENSMUSG00000051185	Fam174a	family with sequence similarity 174, member A	0.7934	0.0834422
ENSMUSG00000059923	Grb2	growth factor receptor bound protein 2	0.87	0.083923
ENSMUSG00000018899	Irf1	interferon regulatory factor 1	-0.3519	0.0840945
ENSMUSG00000028431	Elp1	elongator complex protein 1	0.4305	0.0841676
ENSMUSG00000020859	Spag9	sperm associated antigen 9	0.4666	0.084309
ENSMUSG00000031993	Snx19	sorting nexin 19	0.3152	0.084309
ENSMUSG00000035172	Plekhh3	pleckstrin homology domain containing, family H (w...	1.362	0.0844262
ENSMUSG00000026360	Rgs2	regulator of G-protein signaling 2	-0.3572	0.0844262
ENSMUSG00000063065	Mapk3	mitogen-activated protein kinase 3	-0.3447	0.0844262
ENSMUSG00000001783	Rtcb	RNA 2',3'-cyclic phosphate and 5'-OH ligase	-0.2624	0.0844262
ENSMUSG00000037664	Cdkn1c	cyclin dependent kinase inhibitor 1C	1.097	0.0849929
ENSMUSG00000027184	Caprin1	cell cycle associated protein 1	0.2114	0.0849929
ENSMUSG00000028333	Anp32b	acidic nuclear phosphoprotein 32 family member B	0.6913	0.0854982
ENSMUSG00000021948	Prkcd	protein kinase C, delta	-0.2603	0.0860244
ENSMUSG00000059811	Atl2	atlastin GTPase 2	0.513	0.0866667
ENSMUSG00000032199	Polr2m	polymerase (RNA) II (DNA directed) polypeptide M	1.045	0.0867194
ENSMUSG00000000149	Gna12	guanine nucleotide binding protein, alpha 12	-0.4356	0.0870985
ENSMUSG00000027082	Tfpi	tissue factor pathway inhibitor	0.4045	0.0870985
ENSMUSG00000103144	Pcdhga1	protocadherin gamma subfamily A, 1	0.4676	0.0872701
ENSMUSG00000033697	Arhgap39	Rho GTPase activating protein 39	0.4299	0.0883647
ENSMUSG00000025437	Usp33	ubiquitin specific peptidase 33	0.3088	0.0890453
ENSMUSG00000025702	Marchf8	membrane associated ring-CH-type finger 8	0.6311	0.0901783
ENSMUSG00000026390	Marco	macrophage receptor with collagenous structure	-1.278	0.0904355
ENSMUSG00000074213	Gm10642	predicted gene 10642	1.125	0.0904355
ENSMUSG00000003235	Eif2b5	eukaryotic translation initiation factor 2B, subun...	0.7931	0.0905671
ENSMUSG00000019969	Psen1	presenilin 1	0.1478	0.0910435
ENSMUSG00000058301	Upf1	UPF1 RNA helicase and ATPase	0.8687	0.0910813
ENSMUSG00000023094	Msrb2	methionine sulfoxide reductase B2	-0.3893	0.0914111
ENSMUSG00000030105	Arl8b	ADP-ribosylation factor-like 8B	0.2719	0.0914111
ENSMUSG00000048707	Tprn	taperin	0.8031	0.0915442
ENSMUSG00000092232	Gm20521	predicted gene 20521	0.648	0.0915442
ENSMUSG00000037341	Slc9a7	solute carrier family 9 (sodium/hydrogen exchanger...	0.6433	0.0915442
ENSMUSG00000062210	Tnfaip8	tumor necrosis factor, alpha-induced protein 8	-0.3099	0.0915442
ENSMUSG00000022540	Rogdi	rogdi homolog	-0.3009	0.0915442
ENSMUSG00000028980	H6pd	hexose-6-phosphate dehydrogenase (glucose 1-dehydr...	0.5788	0.0917046
ENSMUSG00000030101	Sumf1	sulfatase modifying factor 1	0.8336	0.0919013
ENSMUSG00000002396	Ocel1	occludin/ELL domain containing 1	0.8248	0.0919013
ENSMUSG00000041629	Vcf1	VCP nuclear cofactor family member 1	0.7212	0.0921924
ENSMUSG00000031584	Gsr	glutathione reductase	0.8842	0.0922035
ENSMUSG00000024120	Lrpprc	leucine-rich PPR-motif containing	0.622	0.0922754
ENSMUSG00000017765	Slc12a4	solute carrier family 12, member 4	0.4377	0.0923035
ENSMUSG00000001751	Naglu	alpha-N-acetylglucosaminidase (Sanfilippo disease ...	0.847	0.0923213
ENSMUSG00000022534	Mefv	Mediterranean fever	-1.378	0.0928355
ENSMUSG00000096351	Samd11	sterile alpha motif domain containing 11	0.5251	0.0928777
ENSMUSG00000071715	Ncf4	neutrophil cytosolic factor 4	-0.3146	0.092965
ENSMUSG00000033767	Tmem131l	transmembrane 131 like	0.3515	0.0932526
ENSMUSG00000034792	Gna15	guanine nucleotide binding protein, alpha 15	-0.3287	0.0933046
ENSMUSG00000022194	Pabpn1	poly(A) binding protein, nuclear 1	0.6032	0.093378
ENSMUSG00000020780	Srp68	signal recognition particle 68	-0.3325	0.093378
ENSMUSG00000026271	Gpr35	G protein-coupled receptor 35	0.3195	0.0936322
ENSMUSG00000023078	Cxcl13	C-X-C motif chemokine ligand 13	-2.013	0.0942202
ENSMUSG00000021288	Klc1	kinesin light chain 1	0.4916	0.0942864
ENSMUSG00000058013	Septin11	septin 11	0.4594	0.0946245
ENSMUSG00000024818	Slc25a45	solute carrier family 25, member 45	-0.2787	0.0946245
ENSMUSG00000029570	Lfng	LFNG O-fucosylpeptide 3-beta-N-acetylglucosaminylt...	0.7869	0.0946544
ENSMUSG00000047388	Atmin	ATM interactor	0.4776	0.0948949
ENSMUSG00000004207	Psap	prosaposin	0.2487	0.0952186
ENSMUSG00000045374	Wdr81	WD repeat domain 81	-0.4244	0.0962396
ENSMUSG00000028790	Khdrbs1	KH domain containing, RNA binding, signal transduc...	0.7709	0.096497
ENSMUSG00000028639	Ybx1	Y box protein 1	0.5677	0.096497
ENSMUSG00000020376	Rnf130	ring finger protein 130	0.85	0.0973457
ENSMUSG00000028669	Pithd1	PITH (C-terminal proteasome-interacting domain of ...	0.9601	0.0977705
ENSMUSG00000066036	Ubr4	ubiquitin protein ligase E3 component n-recognin 4	-0.4691	0.0979103
ENSMUSG00000024190	Dusp1	dual specificity phosphatase 1	1.208	0.0983115
ENSMUSG00000013663	Pten	phosphatase and tensin homolog	0.3641	0.0985662
ENSMUSG00000022131	Gpr180	G protein-coupled receptor 180	0.8725	0.0988281
ENSMUSG00000026142	Rhbdd1	rhomboid domain containing 1	0.3535	0.0988686
ENSMUSG00000024953	Prdx5	peroxiredoxin 5	-0.376	0.0990356
ENSMUSG00000016559	H3f3b	H3.3 histone B	0.2299	0.0990473
ENSMUSG00000036606	Plxnb2	plexin B2	0.1964	0.0997209
ENSMUSG00000058388	Phtf1	putative homeodomain transcription factor 1	0.6851	0.0997903
ENSMUSG00000035770	Dync1li2	dynein, cytoplasmic 1 light intermediate chain 2	0.3689	0.0997903
ENSMUSG00000103472	Pcdhga7	protocadherin gamma subfamily A, 7	0.4606	0.0999419
ENSMUSG00000064367	ND5	NADH dehydrogenase subunit 5	0.3298	0.0999419
ENSMUSG00000029465	Arpc3	actin related protein 2/3 complex, subunit 3	-0.3077	0.0999419
ENSMUSG00000031497	Tnfsf13b	tumor necrosis factor (ligand) superfamily, member...	-0.5249	0.10001
ENSMUSG00000032050	Rdx	radixin	0.4007	0.100161
ENSMUSG00000020234	Tektip1	tektin bundle interacting protein 1	0.6217	0.100203
ENSMUSG00000020538	Srebf1	sterol regulatory element binding transcription fa...	0.3228	0.100759
ENSMUSG00000000567	Sox9	SRY (sex determining region Y)-box 9	1.027	0.10118
ENSMUSG00000020231	Dip2a	disco interacting protein 2 homolog A	0.8911	0.10118
ENSMUSG00000043940	Wdfy3	WD repeat and FYVE domain containing 3	0.305	0.10118
ENSMUSG00000003039	Fam32a	family with sequence similarity 32, member A	-0.3338	0.10173
ENSMUSG00000037965	Zc3h7a	zinc finger CCCH type containing 7 A	0.2012	0.103237
ENSMUSG00000030096	Slc6a6	solute carrier family 6 (neurotransmitter transpor...	0.3483	0.103587
ENSMUSG00000068923	Syt11	synaptotagmin XI	0.41	0.103921
ENSMUSG00000001348	Acp5	acid phosphatase 5, tartrate resistant	-1.073	0.104132
ENSMUSG00000103088	Pcdhgb6	protocadherin gamma subfamily B, 6	0.46	0.104132
ENSMUSG00000030708	Dnajb13	DnaJ heat shock protein family (Hsp40) member B13	-0.715	0.104419
ENSMUSG00000033790	Tubgcp5	tubulin, gamma complex component 5	0.2419	0.104419
ENSMUSG00000069833	Ahnak	AHNAK nucleoprotein	-0.9919	0.10514
ENSMUSG00000030824	Nucb1	nucleobindin 1	0.1246	0.105209
ENSMUSG00000024725	Ostf1	osteoclast stimulating factor 1	-0.2828	0.105606
ENSMUSG00000078317	F8a	factor 8-associated gene A	0.9017	0.105784
ENSMUSG00000018287	Spag7	sperm associated antigen 7	-0.3576	0.107087
ENSMUSG00000040483	Xaf1	XIAP associated factor 1	-0.6948	0.107278
ENSMUSG00000033949	Trim36	tripartite motif-containing 36	0.6908	0.107536
ENSMUSG00000000957	Mmp14	matrix metallopeptidase 14 (membrane-inserted)	0.6554	0.107913
ENSMUSG00000009035	Tmem184b	transmembrane protein 184b	0.2084	0.10898
ENSMUSG00000024644	Cndp2	CNDP dipeptidase 2	-0.2455	0.109308
ENSMUSG00000027519	Rab22a	RAB22A, member RAS oncogene family	0.6513	0.109854
ENSMUSG00000029153	Ociad2	OCIA domain containing 2	0.8288	0.109916
ENSMUSG00000039005	Tlr4	toll-like receptor 4	0.2511	0.109941
ENSMUSG00000039899	Fgl2	fibrinogen-like protein 2	0.4078	0.109998
ENSMUSG00000041827	Oasl1	2'-5' oligoadenylate synthetase-like 1	-0.771	0.110604
ENSMUSG00000042015	Wdr41	WD repeat domain 41	0.4324	0.110695
ENSMUSG00000028557	Rnf11	ring finger protein 11	0.8917	0.111099
ENSMUSG00000020257	Wdr82	WD repeat domain containing 82	0.4522	0.111099
ENSMUSG00000000738	Spg7	SPG7, paraplegin matrix AAA peptidase subunit	0.6565	0.111301
ENSMUSG00000102428	Pcdhga12	protocadherin gamma subfamily A, 12	0.4074	0.112063
ENSMUSG00000028330	Ncbp1	nuclear cap binding protein subunit 1	0.3473	0.112063
ENSMUSG00000028797	Tmem234	transmembrane protein 234	-0.2988	0.112063
ENSMUSG00000059089	Fcgr4	Fc receptor, IgG, low affinity IV	0.2692	0.112063
ENSMUSG00000073481	Mtarc2	mitochondrial amidoxime reducing component 2	0.9351	0.112506
ENSMUSG00000006289	Osgep	O-sialoglycoprotein endopeptidase	-0.3291	0.112952
ENSMUSG00000053907	Mat2a	methionine adenosyltransferase 2A	0.2833	0.113963
ENSMUSG00000047030	Spata2	spermatogenesis associated 2	0.41	0.114008
ENSMUSG00000029781	Fkbp9	FK506 binding protein 9	0.3769	0.114008
ENSMUSG00000039987	Phtf2	putative homeodomain transcription factor 2	0.5418	0.114225
ENSMUSG00000054640	Slc8a1	solute carrier family 8 (sodium/calcium exchanger)...	0.6146	0.11443
ENSMUSG00000021871	Gm49342	predicted gene, 49342	-0.2912	0.11443
ENSMUSG00000078970	Dnaaf10	dynein axonemal assembly factor 10	0.3443	0.11539
ENSMUSG00000020515	Cnot8	CCR4-NOT transcription complex, subunit 8	-0.2966	0.11539
ENSMUSG00000031954	Cfdp1	craniofacial development protein 1	-0.5239	0.115817
ENSMUSG00000029036	Atad3a	ATPase family, AAA domain containing 3A	0.3069	0.115817
ENSMUSG00000030469	Zfp719	zinc finger protein 719	0.4318	0.116228
ENSMUSG00000021945	Zmym2	zinc finger, MYM-type 2	0.376	0.116404
ENSMUSG00000030091	Nup210	nucleoporin 210	0.6126	0.116567
ENSMUSG00000057531	Dtnbp1	dystrobrevin binding protein 1	0.5537	0.116988
ENSMUSG00000096606	Tpbgl	trophoblast glycoprotein-like	0.8997	0.117129
ENSMUSG00000020189	Osbpl8	oxysterol binding protein-like 8	0.6347	0.117373
ENSMUSG00000074622	Mafb	MAF bZIP transcription factor B	0.7418	0.11745
ENSMUSG00000040774	Cept1	choline/ethanolaminephosphotransferase 1	0.2278	0.117515
ENSMUSG00000026579	F5	coagulation factor V	1.399	0.117695
ENSMUSG00000030374	Strn4	striatin, calmodulin binding protein 4	0.5923	0.117695
ENSMUSG00000043998	Mgat2	mannoside acetylglucosaminyltransferase 2	0.8364	0.117967
ENSMUSG00000021608	Lpcat1	lysophosphatidylcholine acyltransferase 1	0.5245	0.117967
ENSMUSG00000032932	Hspa13	heat shock protein 70 family, member 13	0.3832	0.118626
ENSMUSG00000038037	Socs1	suppressor of cytokine signaling 1	1.243	0.119314
ENSMUSG00000041058	Wwp1	WW domain containing E3 ubiquitin protein ligase 1	0.7354	0.119314
ENSMUSG00000034120	Srsf2	serine and arginine-rich splicing factor 2	0.4823	0.119436
ENSMUSG00000020653	Klf11	Kruppel-like transcription factor 11	0.983	0.119813
ENSMUSG00000027177	Hipk3	homeodomain interacting protein kinase 3	0.6235	0.119813
ENSMUSG00000037266	Rsrp1	arginine/serine rich protein 1	0.9404	0.119894
ENSMUSG00000005374	Tbl2	transducin (beta)-like 2	0.3547	0.119997
ENSMUSG00000021583	Erap1	endoplasmic reticulum aminopeptidase 1	0.3419	0.119997
ENSMUSG00000027340	Slc23a2	solute carrier family 23 (nucleobase transporters)...	0.2937	0.119997
ENSMUSG00000039523	Cep104	centrosomal protein 104	0.454	0.120145
ENSMUSG00000026740	Dnajc1	DnaJ heat shock protein family (Hsp40) member C1	0.4045	0.120249
ENSMUSG00000005161	Prdx2	peroxiredoxin 2	-0.3624	0.121445
ENSMUSG00000010358	Ifi35	interferon-induced protein 35	-0.3327	0.121748
ENSMUSG00000046324	Ermp1	endoplasmic reticulum metallopeptidase 1	0.7174	0.12191
ENSMUSG00000026482	Rgl1	ral guanine nucleotide dissociation stimulator,-li...	0.5157	0.12191
ENSMUSG00000022752	Tomm70a	translocase of outer mitochondrial membrane 70A	0.848	0.122114
ENSMUSG00000042208	Sanbr	SANT and BTB domain regulator of CSR	0.8629	0.122561
ENSMUSG00000066306	Numa1	nuclear mitotic apparatus protein 1	-0.342	0.122561
ENSMUSG00000053253	Ndfip2	Nedd4 family interacting protein 2	0.2744	0.122561
ENSMUSG00000028923	Necap2	NECAP endocytosis associated 2	-0.2382	0.122561
ENSMUSG00000025647	Shisa5	shisa family member 5	0.1199	0.122877
ENSMUSG00000070003	Ssbp4	single stranded DNA binding protein 4	0.9535	0.123355
ENSMUSG00000052142	Rasal3	RAS protein activator like 3	0.8321	0.123355
ENSMUSG00000020476	Dbnl	drebrin-like	-0.2602	0.123378
ENSMUSG00000019849	Prep	prolyl endopeptidase	0.5819	0.123583
ENSMUSG00000046110	Serinc4	serine incorporator 4	-0.3833	0.126487
ENSMUSG00000031696	Vps35	VPS35 retromer complex component	0.1496	0.126536
ENSMUSG00000043300	B3galnt1	UDP-GalNAc:betaGlcNAc beta 1,3-galactosaminyltrans...	0.3853	0.127552
ENSMUSG00000019471	Cdc37	cell division cycle 37	-0.283	0.128004
ENSMUSG00000040043	Rbms2	RNA binding motif, single stranded interacting pro...	-0.7315	0.128183
ENSMUSG00000021893	Capn7	calpain 7	0.5629	0.128386
ENSMUSG00000030421	Uri1	URI1, prefoldin-like chaperone	0.7018	0.12901
ENSMUSG00000046062	Ppp1r15b	protein phosphatase 1, regulatory subunit 15B	0.3189	0.12901
ENSMUSG00000036905	C1qb	complement component 1, q subcomponent, beta polyp...	-0.212	0.129332
ENSMUSG00000053119	Chmp3	charged multivesicular body protein 3	-0.3519	0.130016
ENSMUSG00000002984	Tomm40	translocase of outer mitochondrial membrane 40	0.9138	0.130271
ENSMUSG00000020238	Ncln	nicalin	0.4625	0.130271
ENSMUSG00000034855	Cxcl10	C-X-C motif chemokine ligand 10	-0.9146	0.131453
ENSMUSG00000021374	Nup153	nucleoporin 153	0.407	0.131549
ENSMUSG00000027425	Kat14	lysine acetyltransferase 14	0.4032	0.131639
ENSMUSG00000021286	Zfyve21	zinc finger, FYVE domain containing 21	-0.4258	0.131929
ENSMUSG00000024817	Uhrf2	ubiquitin-like, containing PHD and RING finger dom...	0.4215	0.1322
ENSMUSG00000048450	Msx1	msh homeobox 1	1.309	0.133311
ENSMUSG00000029263	Pigg	phosphatidylinositol glycan anchor biosynthesis, c...	0.5198	0.133347
ENSMUSG00000046402	Rbp1	retinol binding protein 1, cellular	1.297	0.133665
ENSMUSG00000030082	Sec61a1	SEC61 translocon subunit alpha 1	0.1921	0.133709
ENSMUSG00000022378	Cyrib	CYFIP related Rac1 interactor B	0.7675	0.133924
ENSMUSG00000005299	Letm1	leucine zipper-EF-hand containing transmembrane pr...	0.6401	0.133984
ENSMUSG00000007833	Aldh16a1	aldehyde dehydrogenase 16 family, member A1	-0.3844	0.133987
ENSMUSG00000035227	Spcs2	signal peptidase complex subunit 2 homolog (S. cer...	0.1398	0.134114
ENSMUSG00000029106	Add1	adducin 1	0.2421	0.134706
ENSMUSG00000025534	Gusb	glucuronidase, beta	0.1449	0.134706
ENSMUSG00000004451	Ralb	v-ral simian leukemia viral oncogene B	-0.2541	0.135889
ENSMUSG00000032412	Atp1b3	ATPase, Na+/K+ transporting, beta 3 polypeptide	0.191	0.135889
ENSMUSG00000015090	Ptgds	prostaglandin D2 synthase (brain)	1.038	0.135944
ENSMUSG00000027199	Gatm	glycine amidinotransferase (L-arginine:glycine ami...	-0.4027	0.136076
ENSMUSG00000022983	Scaf4	SR-related CTD-associated factor 4	0.643	0.136627
ENSMUSG00000074228	Gm10645	predicted gene 10645	0.8892	0.137313
ENSMUSG00000030059	Tmf1	TATA element modulatory factor 1	0.5447	0.138211
ENSMUSG00000022305	Lrp12	low density lipoprotein-related protein 12	0.4613	0.138418
ENSMUSG00000033916	Chmp2a	charged multivesicular body protein 2A	-0.3523	0.138418
ENSMUSG00000031613	Hpgd	hydroxyprostaglandin dehydrogenase 15 (NAD)	-0.2802	0.138418
ENSMUSG00000097221	1810049J17Rik	RIKEN cDNA 1810049J17 gene	1.06	0.138476
ENSMUSG00000033953	Ppp3r1	protein phosphatase 3, regulatory subunit B, alpha...	0.6741	0.138904
ENSMUSG00000043439	Epop	elongin BC and polycomb repressive complex 2 assoc...	1.199	0.139619
ENSMUSG00000019132	BC005537	cDNA sequence BC005537	-0.4851	0.140384
ENSMUSG00000026131	Dst	dystonin	-0.4433	0.140437
ENSMUSG00000024259	Slc25a46	solute carrier family 25, member 46	0.3034	0.140437
ENSMUSG00000004631	Sgce	sarcoglycan, epsilon	0.2484	0.140437
ENSMUSG00000036285	Noa1	nitric oxide associated 1	0.7408	0.140829
ENSMUSG00000023143	Nagpa	N-acetylglucosamine-1-phosphodiester alpha-N-acety...	0.7548	0.141739
ENSMUSG00000024339	Tap2	transporter 2, ATP-binding cassette, sub-family B ...	0.2167	0.142114
ENSMUSG00000032402	Smad3	SMAD family member 3	0.3183	0.142331
ENSMUSG00000020865	Abcc3	ATP-binding cassette, sub-family C member 3	0.2646	0.142331
ENSMUSG00000052684	Jun	jun proto-oncogene	0.8569	0.14323
ENSMUSG00000019802	Sec63	SEC63 homolog, protein translocation regulator	0.4731	0.143324
ENSMUSG00000040552	C3ar1	complement component 3a receptor 1	0.2308	0.143979
ENSMUSG00000035914	Cd276	CD276 antigen	0.6186	0.144194
ENSMUSG00000047777	Phf13	PHD finger protein 13	0.6933	0.144248
ENSMUSG00000023075	Akirin1	akirin 1	0.8907	0.145115
ENSMUSG00000025223	Ldb1	LIM domain binding 1	0.5424	0.145181
ENSMUSG00000026159	Agfg1	ArfGAP with FG repeats 1	0.6772	0.145185
ENSMUSG00000026548	Slamf9	SLAM family member 9	-0.3722	0.145229
ENSMUSG00000022404	Slc25a17	solute carrier family 25 (mitochondrial carrier, p...	0.2864	0.145229
ENSMUSG00000035704	Alg8	ALG8 alpha-1,3-glucosyltransferase	0.2227	0.145229
ENSMUSG00000042197	Zfp451	zinc finger protein 451	0.3104	0.145242
ENSMUSG00000021466	Ptch1	patched 1	0.8821	0.145279
ENSMUSG00000037720	Tmem33	transmembrane protein 33	0.2602	0.145279
ENSMUSG00000004270	Lpcat3	lysophosphatidylcholine acyltransferase 3	0.1685	0.145279
ENSMUSG00000025810	Nrp1	neuropilin 1	0.2488	0.145551
ENSMUSG00000020167	Tcf3	transcription factor 3	0.7182	0.14596
ENSMUSG00000022136	Dnajc3	DnaJ heat shock protein family (Hsp40) member C3	0.5492	0.146411
ENSMUSG00000039988	Ankrd13c	ankyrin repeat domain 13c	0.8363	0.146475
ENSMUSG00000028060	Khdc4	KH domain containing 4, pre-mRNA splicing factor	0.3509	0.147731
ENSMUSG00000023106	Denr	density-regulated protein	-0.3304	0.147731
ENSMUSG00000020585	Laptm4a	lysosomal-associated protein transmembrane 4A	0.1323	0.147731
ENSMUSG00000040016	Ptger3	prostaglandin E receptor 3 (subtype EP3)	1.012	0.148828
ENSMUSG00000024914	Drap1	DR1 associated protein 1	0.5148	0.148828
ENSMUSG00000024856	Cdk2ap2	cyclin dependent kinase 2 associated protein 2	-0.3359	0.148828
ENSMUSG00000027502	Rtf2	replication termination factor 2	-0.2741	0.148828
ENSMUSG00000029614	Rpl6	ribosomal protein L6	-0.3298	0.14928
ENSMUSG00000041515	Irf8	interferon regulatory factor 8	-0.2124	0.149418
ENSMUSG00000033933	Vhl	von Hippel-Lindau tumor suppressor	-0.3306	0.149573
ENSMUSG00000023025	Larp4	La ribonucleoprotein 4	0.3224	0.149584
ENSMUSG00000027198	Ext2	exostosin glycosyltransferase 2	0.5411	0.149956
ENSMUSG00000024072	Yipf4	Yip1 domain family, member 4	0.9485	0.150144
ENSMUSG00000064138	Arb2a	ARB2 cotranscriptional regulator A	0.6654	0.150203
ENSMUSG00000024477	Pggt1b	protein geranylgeranyltransferase type I, beta sub...	0.4724	0.150203
ENSMUSG00000078671	Chd2	chromodomain helicase DNA binding protein 2	-0.4521	0.150203
ENSMUSG00000035151	Elmod2	ELMO/CED-12 domain containing 2	0.3799	0.150203
ENSMUSG00000030047	Arhgap25	Rho GTPase activating protein 25	-0.2334	0.150958
ENSMUSG00000032594	Ip6k1	inositol hexaphosphate kinase 1	0.3647	0.151216
ENSMUSG00000039105	Atp6v1g1	ATPase, H+ transporting, lysosomal V1 subunit G1	-0.288	0.151216
ENSMUSG00000023951	Vegfa	vascular endothelial growth factor A	0.9452	0.151634
ENSMUSG00000026458	Ppfia4	protein tyrosine phosphatase, receptor type, f pol...	-0.2005	0.151634
ENSMUSG00000097100	9230104M06Rik	RIKEN cDNA 9230104M06 gene	0.9671	0.15196
ENSMUSG00000002055	Spag5	sperm associated antigen 5	1.222	0.152468
ENSMUSG00000035692	Isg15	ISG15 ubiquitin-like modifier	-0.7519	0.152468
ENSMUSG00000052812	Atad2b	ATPase family, AAA domain containing 2B	0.8407	0.152741
ENSMUSG00000066324	Bpnt2	3'(2'), 5'-bisphosphate nucleotidase 2	0.64	0.153201
ENSMUSG00000079547	H2-DMb1	histocompatibility 2, class II, locus Mb1	-0.2854	0.153201
ENSMUSG00000028629	Exo5	exonuclease 5	-0.698	0.153326
ENSMUSG00000070493	Chchd2	coiled-coil-helix-coiled-coil-helix domain contain...	-0.3149	0.153873
ENSMUSG00000073422	Hsd17b8	hydroxysteroid 17-beta dehydrogenase 8	0.9542	0.154052
ENSMUSG00000052406	Rexo4	REX4, 3'-5' exonuclease	-0.3426	0.154474
ENSMUSG00000031447	Lamp1	lysosomal-associated membrane protein 1	0.8272	0.154493
ENSMUSG00000027806	Tsc22d2	TSC22 domain family, member 2	0.6321	0.154568
ENSMUSG00000021892	Sh3bp5	SH3-domain binding protein 5 (BTK-associated)	0.4961	0.154568
ENSMUSG00000037400	Atp11b	ATPase, class VI, type 11B	0.4381	0.154568
ENSMUSG00000020978	Klhdc2	kelch domain containing 2	0.7228	0.154786
ENSMUSG00000035354	Uvrag	UV radiation resistance associated gene	0.4888	0.155122
ENSMUSG00000026504	Sdccag8	serologically defined colon cancer antigen 8	-0.4323	0.155916
ENSMUSG00000040383	Aqr	aquarius	0.3088	0.155916
ENSMUSG00000056220	Pla2g4a	phospholipase A2, group IVA (cytosolic, calcium-de...	0.2236	0.155916
ENSMUSG00000038349	Plcl1	phospholipase C-like 1	0.7106	0.156743
ENSMUSG00000020009	Ifngr1	interferon gamma receptor 1	0.1488	0.156964
ENSMUSG00000015478	Rnf5	ring finger protein 5	-0.3647	0.157743
ENSMUSG00000030083	Abtb1	ankyrin repeat and BTB domain containing 1	-0.4162	0.158001
ENSMUSG00000021794	Glud1	glutamate dehydrogenase 1	0.5008	0.158298
ENSMUSG00000036840	Siah1a	siah E3 ubiquitin protein ligase 1A	0.9374	0.158783
ENSMUSG00000049354	Dcaf7	DDB1 and CUL4 associated factor 7	0.3506	0.158783
ENSMUSG00000073542	Cep76	centrosomal protein 76	0.8789	0.158794
ENSMUSG00000037548	H2-DMb2	histocompatibility 2, class II, locus Mb2	-0.6491	0.158794
ENSMUSG00000008859	Rala	v-ral simian leukemia viral oncogene A (ras relate...	0.7506	0.159811
ENSMUSG00000022516	Nudt16l1	nudix hydrolase 16 like 1	-0.3169	0.160491
ENSMUSG00000028899	Taf12	TATA-box binding protein associated factor 12	-0.4543	0.160612
ENSMUSG00000024158	Hagh	hydroxyacyl glutathione hydrolase	-0.3831	0.161702
ENSMUSG00000024359	Hspa9	heat shock protein 9	0.1771	0.161702
ENSMUSG00000023992	Trem2	triggering receptor expressed on myeloid cells 2	-0.217	0.162188
ENSMUSG00000041341	Atg2b	autophagy related 2B	0.5332	0.162314
ENSMUSG00000022601	Zbtb11	zinc finger and BTB domain containing 11	0.4295	0.162314
ENSMUSG00000055762	Eef1d	eukaryotic translation elongation factor 1 delta	-0.3047	0.162314
ENSMUSG00000020611	Gna13	guanine nucleotide binding protein, alpha 13	0.1633	0.162314
ENSMUSG00000024069	Slc30a6	solute carrier family 30 (zinc transporter), membe...	0.3865	0.162523
ENSMUSG00000020133	2310011J03Rik	RIKEN cDNA 2310011J03 gene	-0.3731	0.163284
ENSMUSG00000030707	Coro1a	coronin, actin binding protein 1A	-0.2135	0.163479
ENSMUSG00000062593	Lilrb4a	leukocyte immunoglobulin-like receptor, subfamily ...	0.4747	0.164324
ENSMUSG00000024381	Bin1	bridging integrator 1	-0.3156	0.164454
ENSMUSG00000001829	Clpb	ClpB caseinolytic peptidase B	0.3408	0.164598
ENSMUSG00000026848	Tor1b	torsin family 1, member B	0.2425	0.164686
ENSMUSG00000040848	Sft2d2	SFT2 domain containing 2	0.2312	0.164906
ENSMUSG00000028850	Gpatch3	G patch domain containing 3	0.7074	0.165957
ENSMUSG00000021339	Mrs2	MRS2 magnesium transporter	1.125	0.165967
ENSMUSG00000020142	Slc1a4	solute carrier family 1 (glutamate/neutral amino a...	0.6629	0.165967
ENSMUSG00000029068	Ccnl2	cyclin L2	0.217	0.165967
ENSMUSG00000025759	Mfsd8	major facilitator superfamily domain containing 8	0.5143	0.166016
ENSMUSG00000056116	H2-T22	histocompatibility 2, T region locus 22	-0.5247	0.166309
ENSMUSG00000046675	Lyset	lysosomal enzyme trafficking factor	0.5618	0.166342
ENSMUSG00000020087	Tysnd1	trypsin domain containing 1	0.9419	0.16645
ENSMUSG00000048170	Mcmbp	minichromosome maintenance complex binding protein	0.6794	0.167259
ENSMUSG00000031093	Dock11	dedicator of cytokinesis 11	0.3621	0.167259
ENSMUSG00000045268	Zfp691	zinc finger protein 691	-0.8656	0.167501
ENSMUSG00000026317	Cln8	CLN8 transmembrane ER and ERGIC protein	0.1651	0.167501
ENSMUSG00000030591	Psmd8	proteasome (prosome, macropain) 26S subunit, non-A...	-0.2729	0.167608
ENSMUSG00000026641	Usf1	upstream transcription factor 1	-0.3048	0.16796
ENSMUSG00000033705	Stard9	StAR related lipid transfer domain containing 9	-0.5268	0.167988
ENSMUSG00000036197	Gxylt1	glucoside xylosyltransferase 1	0.5248	0.167988
ENSMUSG00000036534	Slc38a7	solute carrier family 38, member 7	0.2452	0.167988
ENSMUSG00000054716	Zfp771	zinc finger protein 771	1.105	0.168171
ENSMUSG00000037197	Rbm17	RNA binding motif protein 17	0.69	0.168926
ENSMUSG00000020474	Polm	polymerase (DNA directed), mu	-0.6561	0.169015
ENSMUSG00000032504	Pdcd6ip	programmed cell death 6 interacting protein	0.3985	0.169015
ENSMUSG00000071203	Naip5	NLR family, apoptosis inhibitory protein 5	-0.4322	0.169121
ENSMUSG00000030590	Fam98c	family with sequence similarity 98, member C	0.7096	0.1692
ENSMUSG00000052776	Oas1a	2'-5' oligoadenylate synthetase 1A	-0.6456	0.170012
ENSMUSG00000051439	Cd14	CD14 antigen	0.2683	0.170012
ENSMUSG00000071537	Klrg2	killer cell lectin-like receptor subfamily G, memb...	0.9663	0.170359
ENSMUSG00000002104	Rapsn	receptor-associated protein of the synapse	-0.6989	0.170359
ENSMUSG00000031029	Eif3f	eukaryotic translation initiation factor 3, subuni...	0.4781	0.170359
ENSMUSG00000040715	Rsc1a1	regulatory solute carrier protein, family 1, membe...	0.4683	0.170359
ENSMUSG00000031360	Ctps2	cytidine 5'-triphosphate synthase 2	-0.3693	0.170359
ENSMUSG00000053898	Ech1	enoyl coenzyme A hydratase 1, peroxisomal	-0.278	0.170359
ENSMUSG00000026864	Hspa5	heat shock protein 5	0.2717	0.170359
ENSMUSG00000000743	Chmp1a	charged multivesicular body protein 1A	-0.2546	0.170359
ENSMUSG00000029686	Cul1	cullin 1	0.1519	0.170359
ENSMUSG00000003153	Slc2a3	solute carrier family 2 (facilitated glucose trans...	0.522	0.170584
ENSMUSG00000027162	Lin7c	lin-7 homolog C, crumbs cell polarity complex comp...	0.3536	0.170867
ENSMUSG00000023043	Krt18	keratin 18	1.402	0.170992
ENSMUSG00000039148	Sart1	squamous cell carcinoma antigen recognized by T ce...	0.6575	0.171064
ENSMUSG00000056091	St3gal5	ST3 beta-galactoside alpha-2,3-sialyltransferase 5	0.7213	0.171574
ENSMUSG00000029452	Tmem116	transmembrane protein 116	-0.4007	0.171589
ENSMUSG00000027570	Col9a3	collagen, type IX, alpha 3	1.082	0.171712
ENSMUSG00000027893	Ahcyl1	S-adenosylhomocysteine hydrolase-like 1	0.5946	0.171712
ENSMUSG00000029578	Wipi2	WD repeat domain, phosphoinositide interacting 2	0.5027	0.171712
ENSMUSG00000021916	Glt8d1	glycosyltransferase 8 domain containing 1	0.4515	0.171712
ENSMUSG00000037344	Slc12a9	solute carrier family 12 (potassium/chloride trans...	0.2389	0.171712
ENSMUSG00000030745	Il21r	interleukin 21 receptor	0.1465	0.171761
ENSMUSG00000024349	Sting1	stimulator of interferon response cGAMP interactor...	0.1731	0.172021
ENSMUSG00000027593	Raly	hnRNP-associated with lethal yellow	0.699	0.172461
ENSMUSG00000032350	Gclc	glutamate-cysteine ligase, catalytic subunit	0.6794	0.172518
ENSMUSG00000091649	Phf11b	PHD finger protein 11B	-0.5546	0.172518
ENSMUSG00000041992	Rapgef5	Rap guanine nucleotide exchange factor (GEF) 5	0.5501	0.172518
ENSMUSG00000024847	Aip	aryl-hydrocarbon receptor-interacting protein	-0.3307	0.172518
ENSMUSG00000059323	Tonsl	tonsoku-like, DNA repair protein	-0.2475	0.172518
ENSMUSG00000039262	Prrc2b	proline-rich coiled-coil 2B	-0.6625	0.172753
ENSMUSG00000010054	Tusc2	tumor suppressor 2, mitochondrial calcium regulato...	0.8684	0.173458
ENSMUSG00000040339	Eeig2	EEIG family member 2	-0.4569	0.173464
ENSMUSG00000034708	Grn	granulin	0.1463	0.174014
ENSMUSG00000074211	Sdhaf1	succinate dehydrogenase complex assembly factor 1	0.8754	0.174649
ENSMUSG00000056536	Pign	phosphatidylinositol glycan anchor biosynthesis, c...	0.3041	0.174774
ENSMUSG00000049422	Chchd10	coiled-coil-helix-coiled-coil-helix domain contain...	1.055	0.174878
ENSMUSG00000005268	Prlr	prolactin receptor	1.414	0.174992
ENSMUSG00000034744	Nagk	N-acetylglucosamine kinase	-0.4394	0.174992
ENSMUSG00000022682	Rrn3	RRN3 RNA polymerase I transcription factor homolog...	0.3386	0.174992
ENSMUSG00000025969	Nrp2	neuropilin 2	0.3301	0.174992
ENSMUSG00000043716	Rpl7	ribosomal protein L7	-0.3172	0.174992
ENSMUSG00000056121	Fez2	fasciculation and elongation protein zeta 2	-0.2423	0.174992
ENSMUSG00000027784	Ppm1l	protein phosphatase 1 (formerly 2C)-like	0.5124	0.175824
ENSMUSG00000040272	Accs	1-aminocyclopropane-1-carboxylate synthase (inacti...	-0.4482	0.176415
ENSMUSG00000043207	Zmpste24	zinc metallopeptidase, STE24	0.2376	0.176415
ENSMUSG00000030889	Vwa3a	von Willebrand factor A domain containing 3A	0.7218	0.177145
ENSMUSG00000062488	Ifit3b	interferon-induced protein with tetratricopeptide ...	-0.8877	0.177198
ENSMUSG00000026856	Dolpp1	dolichyl pyrophosphate phosphatase 1	0.2469	0.177198
ENSMUSG00000056310	Tyw1	tRNA-yW synthesizing protein 1 homolog (S. cerevis...	0.2652	0.177718
ENSMUSG00000047230	Cldn2	claudin 2	0.8299	0.178681
ENSMUSG00000037370	Enpp1	ectonucleotide pyrophosphatase/phosphodiesterase 1	0.5436	0.178681
ENSMUSG00000026510	Trp53bp2	transformation related protein 53 binding protein ...	0.4376	0.178681
ENSMUSG00000022781	Pak2	p21 (RAC1) activated kinase 2	0.2539	0.178681
ENSMUSG00000020671	Rab10	RAB10, member RAS oncogene family	0.5049	0.17874
ENSMUSG00000019494	Cops6	COP9 signalosome subunit 6	-0.2818	0.179026
ENSMUSG00000025078	Nhlrc2	NHL repeat containing 2	0.4908	0.179567
ENSMUSG00000045165	AI467606	expressed sequence AI467606	0.2452	0.179567
ENSMUSG00000023147	Get1	guided entry of tail-anchored proteins factor 1	0.2978	0.179614
ENSMUSG00000074896	Ifit3	interferon-induced protein with tetratricopeptide ...	-0.8882	0.179923
ENSMUSG00000019188	H13	histocompatibility 13	0.633	0.179923
ENSMUSG00000027613	Eif6	eukaryotic translation initiation factor 6	-0.2696	0.180078
ENSMUSG00000029777	Gars1	glycyl-tRNA synthetase 1	0.6603	0.180142
ENSMUSG00000029096	Htra3	HtrA serine peptidase 3	0.6529	0.181454
ENSMUSG00000027303	Ptpra	protein tyrosine phosphatase receptor type A	0.7577	0.181492
ENSMUSG00000037085	Trmt12	tRNA methyltransferase 12	-0.4534	0.181906
ENSMUSG00000001794	Capns1	calpain, small subunit 1	-0.4466	0.182017
ENSMUSG00000038622	Med30	mediator complex subunit 30	0.7067	0.182092
ENSMUSG00000029458	Brap	BRCA1 associated protein	0.6286	0.182092
ENSMUSG00000027655	Dhx35	DEAH-box helicase 35	-0.5487	0.182092
ENSMUSG00000035356	Nfkbiz	nuclear factor of kappa light polypeptide gene enh...	0.4822	0.182092
ENSMUSG00000027011	Ube2e3	ubiquitin-conjugating enzyme E2E 3	0.4662	0.182092
ENSMUSG00000021395	Spin1	spindlin 1	0.4034	0.182092
ENSMUSG00000005621	Zfp592	zinc finger protein 592	0.4001	0.182092
ENSMUSG00000064210	Ano6	anoctamin 6	0.2695	0.182092
ENSMUSG00000018567	Gabarap	gamma-aminobutyric acid receptor associated protei...	-0.2617	0.182092
ENSMUSG00000000605	Clcn4	chloride channel, voltage-sensitive 4	0.1358	0.182092
ENSMUSG00000037348	Paqr7	progestin and adipoQ receptor family member VII	0.2061	0.18322
ENSMUSG00000022426	Josd1	Josephin domain containing 1	0.6464	0.183348
ENSMUSG00000025742	Prps2	phosphoribosyl pyrophosphate synthetase 2	0.3043	0.183489
ENSMUSG00000019210	Atp6v1e1	ATPase, H+ transporting, lysosomal V1 subunit E1	-0.2855	0.183489
ENSMUSG00000020261	Slc36a1	solute carrier family 36 (proton/amino acid sympor...	-0.4958	0.183523
ENSMUSG00000030516	Tjp1	tight junction protein 1	0.3669	0.183523
ENSMUSG00000019659	Ccdc12	coiled-coil domain containing 12	-0.3354	0.183523
ENSMUSG00000048027	Rgmb	repulsive guidance molecule family member B	0.5465	0.183715
ENSMUSG00000034168	Irf2bpl	interferon regulatory factor 2 binding protein-lik...	0.4269	0.183715
ENSMUSG00000030034	Ino80b	INO80 complex subunit B	0.7912	0.184202
ENSMUSG00000027195	Hsd17b12	hydroxysteroid (17-beta) dehydrogenase 12	0.2442	0.184706
ENSMUSG00000025473	Adam8	a disintegrin and metallopeptidase domain 8	0.5077	0.185063
ENSMUSG00000017466	Timp2	tissue inhibitor of metalloproteinase 2	0.87	0.185476
ENSMUSG00000024142	Mlst8	MTOR associated protein, LST8 homolog (S. cerevisi...	0.4356	0.185767
ENSMUSG00000079197	Psme2	proteasome (prosome, macropain) activator subunit ...	-0.3103	0.185767
ENSMUSG00000045482	Trrap	transformation/transcription domain-associated pro...	-0.4309	0.186371
ENSMUSG00000036748	Cuedc2	CUE domain containing 2	-0.2814	0.186371
ENSMUSG00000034361	Cpne2	copine II	0.9483	0.18667
ENSMUSG00000027782	Kpna4	karyopherin subunit alpha 4	0.4608	0.18667
ENSMUSG00000031897	Psmb10	proteasome (prosome, macropain) subunit, beta type...	-0.3055	0.186787
ENSMUSG00000025220	Oga	O-GlcNAcase	0.3073	0.187076
ENSMUSG00000021550	Qng1	Q-nucleotide N-glycosylase 1	0.8377	0.188053
ENSMUSG00000045287	Rtn4rl1	reticulon 4 receptor-like 1	0.5499	0.188053
ENSMUSG00000038759	Nup205	nucleoporin 205	0.558	0.189306
ENSMUSG00000004707	Ly9	lymphocyte antigen 9	0.3549	0.189443
ENSMUSG00000015747	Vps45	vacuolar protein sorting 45	-0.4826	0.189529
ENSMUSG00000028439	Fam219a	family with sequence similarity 219, member A	0.6136	0.189613
ENSMUSG00000032867	Fbxw8	F-box and WD-40 domain protein 8	0.5401	0.189613
ENSMUSG00000062234	Gak	cyclin G associated kinase	0.1796	0.189613
ENSMUSG00000039428	Tmem135	transmembrane protein 135	0.1796	0.190618
ENSMUSG00000047044	D030056L22Rik	RIKEN cDNA D030056L22 gene	0.7504	0.191534
ENSMUSG00000030814	Bcl7c	B cell CLL/lymphoma 7C	0.7745	0.191817
ENSMUSG00000003545	Fosb	FBJ osteosarcoma oncogene B	-0.663	0.192107
ENSMUSG00000040859	Bsdc1	BSD domain containing 1	-0.4503	0.192173
ENSMUSG00000026895	Ndufa8	NADH:ubiquinone oxidoreductase subunit A8	-0.335	0.192173
ENSMUSG00000036620	Mgat4b	mannoside acetylglucosaminyltransferase 4, isoenzy...	0.5019	0.193242
ENSMUSG00000026121	Sema4c	sema domain, immunoglobulin domain (Ig), transmemb...	0.3302	0.193242
ENSMUSG00000022831	Hcls1	hematopoietic cell specific Lyn substrate 1	-0.2703	0.193242
ENSMUSG00000028976	Slc2a5	solute carrier family 2 (facilitated glucose trans...	0.2236	0.193242
ENSMUSG00000020368	Canx	calnexin	0.09135	0.195579
ENSMUSG00000042628	Zfyve1	zinc finger, FYVE domain containing 1	-0.5783	0.195833
ENSMUSG00000089739	Gm20431	predicted gene 20431	0.2924	0.195925
ENSMUSG00000033055	Ankrd54	ankyrin repeat domain 54	0.7286	0.196146
ENSMUSG00000022855	Senp2	SUMO/sentrin specific peptidase 2	0.3901	0.1963
ENSMUSG00000042594	Sh2b3	SH2B adaptor protein 3	0.605	0.196543
ENSMUSG00000005823	Gpr108	G protein-coupled receptor 108	0.1607	0.196787
ENSMUSG00000027194	Ttc17	tetratricopeptide repeat domain 17	0.3148	0.196796
ENSMUSG00000028672	Hmgcl	3-hydroxy-3-methylglutaryl-Coenzyme A lyase	-0.2798	0.196796
ENSMUSG00000020708	Psmc5	protease (prosome, macropain) 26S subunit, ATPase ...	-0.2563	0.196796
ENSMUSG00000002803	Btbd6	BTB domain containing 6	0.7715	0.197171
ENSMUSG00000044533	Rps2	ribosomal protein S2	-0.2674	0.197258
ENSMUSG00000020544	Cox11	cytochrome c oxidase assembly protein 11, copper c...	0.7223	0.197847
ENSMUSG00000025871	4833439L19Rik	RIKEN cDNA 4833439L19 gene	-0.2334	0.198052
ENSMUSG00000030062	Rpn1	ribophorin I	0.1565	0.198052
ENSMUSG00000003363	Pld3	phospholipase D family member 3	0.2214	0.198082
ENSMUSG00000070697	Utp3	UTP3 small subunit processome component	-0.3486	0.198145
ENSMUSG00000015766	Eps8	epidermal growth factor receptor pathway substrate...	0.5213	0.198481
ENSMUSG00000032244	Fem1b	fem 1 homolog b	0.4027	0.198481
ENSMUSG00000027291	Vps39	VPS39 HOPS complex subunit	-0.3163	0.198481
ENSMUSG00000030979	Uros	uroporphyrinogen III synthase	-0.4575	0.198744
ENSMUSG00000034893	Cog3	component of oligomeric golgi complex 3	0.3609	0.198745
ENSMUSG00000015839	Nfe2l2	nuclear factor, erythroid derived 2, like 2	-0.2185	0.199368
ENSMUSG00000029587	Zfp12	zinc finger protein 12	0.4712	0.199998
ENSMUSG00000028793	Rnf19b	ring finger protein 19B	0.3968	0.199998
ENSMUSG00000040997	Abhd4	abhydrolase domain containing 4	-0.2911	0.199998
ENSMUSG00000014778	Fhod1	formin homology 2 domain containing 1	-0.5498	0.200201
ENSMUSG00000020640	Itsn2	intersectin 2	0.4631	0.200228
ENSMUSG00000056851	Pcbp2	poly(rC) binding protein 2	-0.3989	0.200228
ENSMUSG00000072235	Tuba1a	tubulin, alpha 1A	-0.2441	0.200228
ENSMUSG00000004846	Plod3	procollagen-lysine, 2-oxoglutarate 5-dioxygenase 3	0.1563	0.200874
ENSMUSG00000053687	Dpep2	dipeptidase 2	-0.7519	0.200877
ENSMUSG00000090164	BC035044	cDNA sequence BC035044	-0.313	0.201099
ENSMUSG00000026927	Entr1	endosome associated trafficking regulator 1	0.494	0.201293
ENSMUSG00000032497	Lrrfip2	leucine rich repeat (in FLII) interacting protein ...	0.5194	0.201438
ENSMUSG00000026728	Vim	vimentin	-0.5919	0.202045
ENSMUSG00000061273	Mmgt1	membrane magnesium transporter 1	0.3999	0.202703
ENSMUSG00000021848	Otx2	orthodenticle homeobox 2	1.106	0.202883
ENSMUSG00000024927	Rela	v-rel reticuloendotheliosis viral oncogene homolog...	-0.2819	0.202883
ENSMUSG00000029413	Naaa	N-acylethanolamine acid amidase	0.2403	0.203434
ENSMUSG00000034064	Poglut1	protein O-glucosyltransferase 1	0.2905	0.203771
ENSMUSG00000031786	Drc7	dynein regulatory complex subunit 7	1.17	0.204457
ENSMUSG00000061028	Clasrp	CLK4-associating serine/arginine rich protein	0.7647	0.204457
ENSMUSG00000038705	Gmeb2	glucocorticoid modulatory element binding protein ...	0.6644	0.204732
ENSMUSG00000058454	Dhcr7	7-dehydrocholesterol reductase	0.3915	0.204732
ENSMUSG00000060600	Eno3	enolase 3, beta muscle	-0.5338	0.205029
ENSMUSG00000034714	Ttyh2	tweety family member 2	0.7463	0.205223
ENSMUSG00000073434	Wdr90	WD repeat domain 90	0.6769	0.205223
ENSMUSG00000024965	Fermt3	fermitin family member 3	-0.1699	0.205511
ENSMUSG00000027875	Hmgcs2	3-hydroxy-3-methylglutaryl-Coenzyme A synthase 2	0.9502	0.205803
ENSMUSG00000026880	Stom	stomatin	0.5189	0.205803
ENSMUSG00000011179	Odc1	ornithine decarboxylase, structural 1	0.4658	0.205803
ENSMUSG00000028245	Nsmaf	neutral sphingomyelinase (N-SMase) activation asso...	0.4118	0.205803
ENSMUSG00000057421	Las1l	LAS1-like (S. cerevisiae)	0.3078	0.205803
ENSMUSG00000015568	Lpl	lipoprotein lipase	0.6259	0.206042
ENSMUSG00000060512	0610040J01Rik	RIKEN cDNA 0610040J01 gene	-0.209	0.206248
ENSMUSG00000084950	Gm5577	predicted gene 5577	-0.3221	0.206586
ENSMUSG00000033701	Acbd6	acyl-Coenzyme A binding domain containing 6	0.6546	0.206603
ENSMUSG00000034201	Gas2l1	growth arrest-specific 2 like 1	0.8934	0.206642
ENSMUSG00000024095	Hnrnpll	heterogeneous nuclear ribonucleoprotein L-like	0.4331	0.20671
ENSMUSG00000021650	Ptcd2	pentatricopeptide repeat domain 2	-0.4075	0.20709
ENSMUSG00000022553	Maf1	MAF1 homolog, negative regulator of RNA polymerase...	-0.2607	0.207833
ENSMUSG00000029538	Srsf9	serine and arginine-rich splicing factor 9	0.7158	0.207866
ENSMUSG00000021595	Nsun2	NOL1/NOP2/Sun domain family member 2	0.5513	0.208282
ENSMUSG00000029312	Klhl8	kelch-like 8	0.8443	0.208331
ENSMUSG00000034292	Traf3ip1	TRAF3 interacting protein 1	1.046	0.208513
ENSMUSG00000025823	Pdia4	protein disulfide isomerase associated 4	0.1873	0.208552
ENSMUSG00000043391	2510009E07Rik	RIKEN cDNA 2510009E07 gene	0.7604	0.208566
ENSMUSG00000004610	Etfb	electron transferring flavoprotein, beta polypepti...	-0.3344	0.209078
ENSMUSG00000046207	Pik3r6	phosphoinositide-3-kinase regulatory subunit 5	0.2191	0.209078
ENSMUSG00000031983	2310022B05Rik	RIKEN cDNA 2310022B05 gene	0.8401	0.209791
ENSMUSG00000021870	Slmap	sarcolemma associated protein	0.3353	0.209791
ENSMUSG00000036918	Ttc7	tetratricopeptide repeat domain 7	0.3351	0.209791
ENSMUSG00000046223	Plaur	plasminogen activator, urokinase receptor	0.3143	0.209791
ENSMUSG00000024300	Myo1f	myosin IF	-0.1904	0.209791
ENSMUSG00000020440	Arf5	ADP-ribosylation factor 5	0.4661	0.209835
ENSMUSG00000010936	Vac14	Vac14 homolog (S. cerevisiae)	0.51	0.210536
ENSMUSG00000002103	Acp2	acid phosphatase 2, lysosomal	0.114	0.211054
ENSMUSG00000028334	Nans	N-acetylneuraminic acid synthase (sialic acid synt...	-0.3777	0.211678
ENSMUSG00000026029	Casp8	caspase 8	-0.2276	0.211678
ENSMUSG00000041879	Ipo9	importin 9	0.1744	0.211678
ENSMUSG00000023286	Ube2j2	ubiquitin-conjugating enzyme E2J 2	0.6916	0.211804
ENSMUSG00000021408	Ripk1	receptor (TNFRSF)-interacting serine-threonine kin...	0.5795	0.212198
ENSMUSG00000028413	B4galt1	UDP-Gal:betaGlcNAc beta 1,4- galactosyltransferase...	0.4442	0.212198
ENSMUSG00000001827	Folr1	folate receptor alpha	0.9519	0.212769
ENSMUSG00000021051	Ppp2r5e	protein phosphatase 2, regulatory subunit B', epsi...	0.6135	0.212769
ENSMUSG00000070031	Sp140	Sp140 nuclear body protein	-0.5225	0.212769
ENSMUSG00000032344	Cgas	cyclic GMP-AMP synthase	0.3766	0.212769
ENSMUSG00000032382	Snx1	sorting nexin 1	-0.2486	0.212769
ENSMUSG00000025465	Echs1	enoyl Coenzyme A hydratase, short chain, 1, mitoch...	-0.3348	0.21289
ENSMUSG00000026867	Gapvd1	GTPase activating protein and VPS9 domains 1	0.1745	0.213627
ENSMUSG00000047036	Zfp445	zinc finger protein 445	0.4252	0.214194
ENSMUSG00000056941	Commd7	COMM domain containing 7	-0.2833	0.214194
ENSMUSG00000028961	Pgd	phosphogluconate dehydrogenase	0.1498	0.214194
ENSMUSG00000056394	Lig1	ligase I, DNA, ATP-dependent	-0.6569	0.214881
ENSMUSG00000024750	Zfand5	zinc finger, AN1-type domain 5	0.4001	0.215038
ENSMUSG00000035161	Ints6	integrator complex subunit 6	0.3977	0.215038
ENSMUSG00000004568	Arhgef18	Rho/Rac guanine nucleotide exchange factor 18	0.3689	0.215181
ENSMUSG00000026502	Desi2	desumoylating isopeptidase 2	0.557	0.215384
ENSMUSG00000035268	Pkig	protein kinase inhibitor, gamma	-0.3197	0.215905
ENSMUSG00000024970	Spindoc	spindlin interactor and repressor of chromatin bin...	0.6485	0.217821
ENSMUSG00000006932	Ctnnb1	catenin beta 1	0.2885	0.217821
ENSMUSG00000015937	Macroh2a1	macroH2A.1 histone	0.5748	0.218238
ENSMUSG00000022756	Slc7a4	solute carrier family 7 (cationic amino acid trans...	0.7988	0.218651
ENSMUSG00000040907	Atp1a3	ATPase, Na+/K+ transporting, alpha 3 polypeptide	0.4027	0.218651
ENSMUSG00000063849	Ppcdc	phosphopantothenoylcysteine decarboxylase	-0.2412	0.21878
ENSMUSG00000002504	Nherf2	NHERF family PDZ scaffold protein 2	0.9699	0.219068
ENSMUSG00000028911	Srsf4	serine and arginine-rich splicing factor 4	0.337	0.219068
ENSMUSG00000066278	Vps37b	vacuolar protein sorting 37B	0.2582	0.219068
ENSMUSG00000031546	Gins4	GINS complex subunit 4	-0.4556	0.219733
ENSMUSG00000033809	Alg3	ALG3 alpha-1,3- mannosyltransferase	0.2311	0.219825
ENSMUSG00000020553	Pctp	phosphatidylcholine transfer protein	-0.4545	0.220097
ENSMUSG00000032998	Foxj3	forkhead box J3	0.4351	0.220097
ENSMUSG00000044231	Nhlrc1	NHL repeat containing 1	0.8661	0.220311
ENSMUSG00000053411	Cbx7	chromobox 7	0.5059	0.220311
ENSMUSG00000057596	Trim30d	tripartite motif-containing 30D	-0.491	0.220311
ENSMUSG00000034243	Golgb1	golgin B1	-0.4042	0.220311
ENSMUSG00000031232	Magt1	magnesium transporter 1	0.2044	0.220311
ENSMUSG00000008318	Relt	RELT tumor necrosis factor receptor	0.3939	0.220624
ENSMUSG00000011158	Brf1	BRF1, RNA polymerase III transcription initiation ...	0.5502	0.220714
ENSMUSG00000032381	Ciao2a	cytosolic iron-sulfur assembly component 2A	-0.3081	0.220993
ENSMUSG00000046152	Fut10	fucosyltransferase 10	0.4406	0.221088
ENSMUSG00000042642	Flad1	flavin adenine dinucleotide synthetase 1	-0.3404	0.221088
ENSMUSG00000040751	Lat2	linker for activation of T cells family, member 2	-0.2663	0.221088
ENSMUSG00000026663	Atf6	activating transcription factor 6	0.2632	0.221088
ENSMUSG00000027763	Mbnl1	muscleblind like splicing regulator 1	0.158	0.221088
ENSMUSG00000050188	Lsm10	U7 snRNP-specific Sm-like protein LSM10	-0.4076	0.221328
ENSMUSG00000020594	Pum2	pumilio RNA-binding family member 2	-0.5506	0.222202
ENSMUSG00000026311	Asb1	ankyrin repeat and SOCS box-containing 1	0.5741	0.223235
ENSMUSG00000038623	Tm6sf1	transmembrane 6 superfamily member 1	0.4797	0.223312
ENSMUSG00000041491	Cep78	centrosomal protein 78	0.6993	0.223579
ENSMUSG00000057219	Armc7	armadillo repeat containing 7	-0.3503	0.223889
ENSMUSG00000040351	Ankib1	ankyrin repeat and IBR domain containing 1	0.6552	0.225073
ENSMUSG00000032239	Rp9	retinitis pigmentosa 9 (human)	0.6284	0.225073
ENSMUSG00000030342	Cd9	CD9 antigen	0.1808	0.225073
ENSMUSG00000006494	Pdk1	pyruvate dehydrogenase kinase, isoenzyme 1	0.3418	0.225822
ENSMUSG00000032586	Traip	TRAF-interacting protein	-1.086	0.225891
ENSMUSG00000027602	Map1lc3a	microtubule-associated protein 1 light chain 3 alp...	0.5579	0.225891
ENSMUSG00000019578	Ubxn6	UBX domain protein 6	-0.3805	0.225891
ENSMUSG00000058586	Serhl	serine hydrolase-like	-0.3137	0.225891
ENSMUSG00000029649	Pomp	proteasome maturation protein	-0.3065	0.225891
ENSMUSG00000055371	Stam2	signal transducing adaptor molecule (SH3 domain an...	0.2562	0.226217
ENSMUSG00000027404	Snrpb	small nuclear ribonucleoprotein B	-0.2187	0.226217
ENSMUSG00000031751	Amfr	autocrine motility factor receptor	0.411	0.226455
ENSMUSG00000003166	Dgcr2	DiGeorge syndrome critical region gene 2	0.2874	0.226455
ENSMUSG00000029534	St7	suppression of tumorigenicity 7	0.7592	0.226531
ENSMUSG00000034158	Lrrc58	leucine rich repeat containing 58	0.3403	0.226531
ENSMUSG00000002871	Tpra1	transmembrane protein, adipocyte asscociated 1	-0.2857	0.226531
ENSMUSG00000000555	Itga5	integrin alpha 5 (fibronectin receptor alpha)	0.2368	0.226531
ENSMUSG00000028851	Nudc	nudC nuclear distribution protein	-0.2964	0.22666
ENSMUSG00000032688	Malt1	MALT1 paracaspase	0.533	0.226781
ENSMUSG00000037119	Fam91a1	family with sequence similarity 91, member A1	0.2649	0.226781
ENSMUSG00000031785	Adgrg1	adhesion G protein-coupled receptor G1	0.1294	0.227131
ENSMUSG00000025034	Trim8	tripartite motif-containing 8	0.357	0.227189
ENSMUSG00000037058	Paip2	polyadenylate-binding protein-interacting protein ...	-0.2891	0.228109
ENSMUSG00000050192	Eif5a2	eukaryotic translation initiation factor 5A2	0.8477	0.228369
ENSMUSG00000020573	Pik3cg	phosphatidylinositol-4,5-bisphosphate 3-kinase cat...	0.1846	0.228369
ENSMUSG00000051853	Arf3	ADP-ribosylation factor 3	0.4116	0.228655
ENSMUSG00000004319	Clcn3	chloride channel, voltage-sensitive 3	0.2746	0.228655
ENSMUSG00000052155	Acvr2a	activin receptor IIA	0.6062	0.228724
ENSMUSG00000039047	Pigk	phosphatidylinositol glycan anchor biosynthesis, c...	0.2259	0.228724
ENSMUSG00000032002	Dcun1d5	defective in cullin neddylation 1 domain containin...	0.814	0.229602
ENSMUSG00000018286	Psmb6	proteasome (prosome, macropain) subunit, beta type...	-0.2331	0.229758
ENSMUSG00000033096	Apmap	adipocyte plasma membrane associated protein	0.2644	0.229952
ENSMUSG00000024063	Lbh	limb-bud and heart	-0.6199	0.230034
ENSMUSG00000038323	1700066M21Rik	RIKEN cDNA 1700066M21 gene	0.6908	0.230509
ENSMUSG00000021733	Slc4a7	solute carrier family 4, sodium bicarbonate cotran...	0.4122	0.230509
ENSMUSG00000073598	Smim33	small integral membrane protein 33	-0.3684	0.230509
ENSMUSG00000001999	Blvra	biliverdin reductase A	-0.3562	0.230509
ENSMUSG00000044876	Zfp444	zinc finger protein 444	0.7472	0.230618
ENSMUSG00000034118	Tpst1	protein-tyrosine sulfotransferase 1	0.5904	0.230618
ENSMUSG00000031154	Otud5	OTU domain containing 5	0.557	0.230657
ENSMUSG00000026875	Traf1	TNF receptor-associated factor 1	-0.9966	0.231033
ENSMUSG00000060992	Copz1	coatomer protein complex, subunit zeta 1	-0.2421	0.231033
ENSMUSG00000030166	Rad52	RAD52 homolog, DNA repair protein	-0.6571	0.231072
ENSMUSG00000004096	Cwc15	CWC15 spliceosome-associated protein	-0.3807	0.231072
ENSMUSG00000022893	Adamts1	ADAM metallopeptidase with thrombospondin type 1 m...	0.8705	0.231097
ENSMUSG00000031527	Eri1	exoribonuclease 1	0.5588	0.231287
ENSMUSG00000040620	Dhx33	DEAH-box helicase 33	0.3271	0.231764
ENSMUSG00000041958	Pigs	phosphatidylinositol glycan anchor biosynthesis, c...	0.1756	0.231764
ENSMUSG00000006931	P3h4	prolyl 3-hydroxylase family member 4 (non-enzymati...	0.8999	0.232156
ENSMUSG00000002320	Tm9sf1	transmembrane 9 superfamily member 1	0.1532	0.232156
ENSMUSG00000026879	Gsn	gelsolin	-0.5649	0.23301
ENSMUSG00000057738	Sptan1	spectrin alpha, non-erythrocytic 1	-0.4475	0.23301
ENSMUSG00000029310	Nudt9	nudix hydrolase 9	0.4062	0.23301
ENSMUSG00000085111	Ascl4	achaete-scute family bHLH transcription factor 4	-0.415	0.233112
ENSMUSG00000025366	Esyt1	extended synaptotagmin-like protein 1	0.2005	0.233205
ENSMUSG00000055435	Maf	MAF bZIP transcription factor	-0.3486	0.234157
ENSMUSG00000063015	Ccni	cyclin I	0.526	0.234231
ENSMUSG00000032046	Abhd12	abhydrolase domain containing 12	0.6556	0.234274
ENSMUSG00000035944	Ttc38	tetratricopeptide repeat domain 38	-0.6618	0.234609
ENSMUSG00000035021	Baz1a	bromodomain adjacent to zinc finger domain 1A	0.4143	0.234609
ENSMUSG00000028041	Adam15	ADAM metallopeptidase domain 15	0.2146	0.234609
ENSMUSG00000041057	Wdr43	WD repeat domain 43	0.2223	0.235076
ENSMUSG00000068566	Myadm	myeloid-associated differentiation marker	0.1848	0.235076
ENSMUSG00000037573	Tob1	transducer of ErbB-2.1	0.9761	0.235139
ENSMUSG00000004951	Hspb1	heat shock protein 1	0.6665	0.235277
ENSMUSG00000021109	Hif1a	hypoxia inducible factor 1, alpha subunit	0.328	0.235277
ENSMUSG00000006299	Aamp	angio-associated migratory protein	-0.201	0.235729
ENSMUSG00000025607	Copg2	coatomer protein complex, subunit gamma 2	0.3741	0.235774
ENSMUSG00000028680	Plk3	polo like kinase 3	0.6211	0.237322
ENSMUSG00000042684	Npl	N-acetylneuraminate pyruvate lyase	-0.2744	0.237473
ENSMUSG00000027947	Il6ra	interleukin 6 receptor, alpha	0.5762	0.238046
ENSMUSG00000024013	Fgd2	FYVE, RhoGEF and PH domain containing 2	-0.1899	0.238125
ENSMUSG00000040105	Plpp6	phospholipid phosphatase 6	0.8917	0.238248
ENSMUSG00000010751	Tnfrsf22	tumor necrosis factor receptor superfamily, member...	0.6516	0.238248
ENSMUSG00000022663	Atg3	autophagy related 3	0.6019	0.238538
ENSMUSG00000022807	Osbpl11	oxysterol binding protein-like 11	0.5988	0.238538
ENSMUSG00000042874	D930007J09Rik	RIKEN cDNA D930007J09 gene	0.8728	0.23905
ENSMUSG00000070034	Sp110	Sp110 nuclear body protein	-0.3059	0.239097
ENSMUSG00000015804	Med28	mediator complex subunit 28	-0.3455	0.240341
ENSMUSG00000031517	Gpm6a	glycoprotein m6a	1.182	0.240606
ENSMUSG00000071723	Gspt2	G1 to S phase transition 2	0.9439	0.241565
ENSMUSG00000045095	Magi1	membrane associated guanylate kinase, WW and PDZ d...	0.639	0.241565
ENSMUSG00000042599	Kdm7a	lysine (K)-specific demethylase 7A	0.3929	0.241565
ENSMUSG00000066975	Cryba4	crystallin, beta A4	-0.4099	0.241934
ENSMUSG00000030515	Tars3	threonyl-tRNA synthetase 3	0.8889	0.242395
ENSMUSG00000043157	Arl11	ADP-ribosylation factor-like 11	-0.4182	0.242395
ENSMUSG00000036513	Commd2	COMM domain containing 2	-0.3934	0.242395
ENSMUSG00000064363	ND4	NADH dehydrogenase subunit 4	0.2402	0.242583
ENSMUSG00000035027	Map2k2	mitogen-activated protein kinase kinase 2	0.639	0.242684
ENSMUSG00000029426	Scarb2	scavenger receptor class B, member 2	0.1862	0.243197
ENSMUSG00000029405	G3bp2	G3BP stress granule assembly factor 2	0.1418	0.244051
ENSMUSG00000062591	Tubb4a	tubulin, beta 4A class IVA	0.7746	0.244316
ENSMUSG00000028556	Dock7	dedicator of cytokinesis 7	0.4078	0.244316
ENSMUSG00000052102	Gnpda1	glucosamine-6-phosphate deaminase 1	-0.2943	0.244316
ENSMUSG00000021911	Parg	poly (ADP-ribose) glycohydrolase	0.4424	0.244369
ENSMUSG00000036570	Fxyd1	FXYD domain-containing ion transport regulator 1	0.806	0.245927
ENSMUSG00000035493	Tgfbi	transforming growth factor, beta induced	-0.3958	0.245927
ENSMUSG00000072620	Slfn2	schlafen 2	-0.3771	0.24605
ENSMUSG00000020432	Tcn2	transcobalamin 2	0.1518	0.246119
ENSMUSG00000026219	Trip12	thyroid hormone receptor interactor 12	-0.3721	0.247229
ENSMUSG00000052459	Atp6v1a	ATPase, H+ transporting, lysosomal V1 subunit A	0.1923	0.247498
ENSMUSG00000038059	Smim3	small integral membrane protein 3	-0.3487	0.247656
ENSMUSG00000019590	Cyb561	cytochrome b-561	0.9945	0.248694
ENSMUSG00000021072	Tmx1	thioredoxin-related transmembrane protein 1	0.2056	0.248694
ENSMUSG00000021701	Plk2	polo like kinase 2	0.5076	0.249106
ENSMUSG00000064284	Cdpf1	cysteine rich, DPF motif domain containing 1	-0.4972	0.249161
ENSMUSG00000015542	Nat9	N-acetyltransferase 9 (GCN5-related, putative)	-0.4115	0.249161
ENSMUSG00000047539	Fbxo28	F-box protein 28	0.6011	0.249651
ENSMUSG00000032399	Rpl4	ribosomal protein L4	-0.2183	0.24993
ENSMUSG00000028138	Adh5	alcohol dehydrogenase 5 (class III), chi polypepti...	-0.294	0.250187
ENSMUSG00000052512	Nav2	neuron navigator 2	0.3208	0.25024
ENSMUSG00000036395	Glb1l2	galactosidase, beta 1-like 2	0.9207	0.251446
ENSMUSG00000057667	Bloc1s3	biogenesis of lysosomal organelles complex-1, subu...	1.028	0.252136
ENSMUSG00000018415	Gid4	GID complex subunit 4, VID24 homolog	0.4856	0.252136
ENSMUSG00000031328	Flna	filamin, alpha	0.237	0.252136
ENSMUSG00000037499	Nenf	neuron derived neurotrophic factor	0.6657	0.252148
ENSMUSG00000049401	Ogfr	opioid growth factor receptor	-0.3075	0.25238
ENSMUSG00000016984	Etaa1	Ewing tumor-associated antigen 1	0.652	0.252456
ENSMUSG00000046861	Hectd3	HECT domain E3 ubiquitin protein ligase 3	0.5605	0.252837
ENSMUSG00000030805	Stx4a	syntaxin 4A (placental)	-0.3757	0.253079
ENSMUSG00000057388	Mrpl18	mitochondrial ribosomal protein L18	-0.3721	0.253087
ENSMUSG00000028578	Caap1	caspase activity and apoptosis inhibitor 1	0.8856	0.253118
ENSMUSG00000026679	Enkur	enkurin, TRPC channel interacting protein	-0.714	0.253118
ENSMUSG00000029419	Ajm1	apical junction component 1	0.5784	0.253118
ENSMUSG00000026803	Ttf1	transcription termination factor, RNA polymerase I	-0.4398	0.253118
ENSMUSG00000030407	Qpctl	glutaminyl-peptide cyclotransferase-like	0.3754	0.253118
ENSMUSG00000024290	Rock1	Rho-associated coiled-coil containing protein kina...	0.3754	0.253118
ENSMUSG00000037661	Gpr160	G protein-coupled receptor 160	-0.3606	0.253118
ENSMUSG00000028447	Dctn3	dynactin 3	-0.3501	0.253118
ENSMUSG00000028843	Sh3bgrl3	SH3 domain binding glutamic acid-rich protein-like...	-0.2969	0.253118
ENSMUSG00000050708	Ftl1	ferritin light polypeptide 1	-0.2587	0.253118
ENSMUSG00000038843	Gcnt1	glucosaminyl (N-acetyl) transferase 1, core 2	0.2107	0.253118
ENSMUSG00000015869	Prpsap1	phosphoribosyl pyrophosphate synthetase-associated...	0.6697	0.253653
ENSMUSG00000043323	Fbrsl1	fibrosin-like 1	0.6206	0.254917
ENSMUSG00000022216	Psme1	proteasome (prosome, macropain) activator subunit ...	-0.2774	0.254917
ENSMUSG00000016763	Scube1	signal peptide, CUB domain, EGF-like 1	0.8974	0.255404
ENSMUSG00000025049	Taf5	TATA-box binding protein associated factor 5	0.7398	0.255404
ENSMUSG00000070407	Hs3st3b1	heparan sulfate (glucosamine) 3-O-sulfotransferase...	0.7333	0.255404
ENSMUSG00000038888	Ctu1	cytosolic thiouridylase subunit 1	0.5576	0.255404
ENSMUSG00000028826	Maco1	macoilin 1	0.5356	0.255404
ENSMUSG00000032740	Ccdc88a	coiled coil domain containing 88A	0.4788	0.255404
ENSMUSG00000035007	Rundc1	RUN domain containing 1	0.474	0.255404
ENSMUSG00000024401	Tnf	tumor necrosis factor	0.3587	0.255404
ENSMUSG00000007721	Ccdc124	coiled-coil domain containing 124	-0.3419	0.255404
ENSMUSG00000031604	Msmo1	methylsterol monoxygenase 1	0.3247	0.255404
ENSMUSG00000026254	Eif4e2	eukaryotic translation initiation factor 4E member...	-0.3	0.255404
ENSMUSG00000027889	Ampd2	adenosine monophosphate deaminase 2	0.2284	0.255404
ENSMUSG00000003316	Glg1	golgi apparatus protein 1	0.4546	0.255452
ENSMUSG00000014361	Mertk	MER proto-oncogene tyrosine kinase	0.1777	0.255867
ENSMUSG00000027130	Slc12a6	solute carrier family 12, member 6	0.2253	0.256213
ENSMUSG00000024659	Anxa1	annexin A1	-0.8411	0.256222
ENSMUSG00000029771	Irf5	interferon regulatory factor 5	-0.1635	0.256222
ENSMUSG00000021669	Cert1	ceramide transporter 1	0.5037	0.257042
ENSMUSG00000043252	Tmem64	transmembrane protein 64	0.5614	0.257287
ENSMUSG00000029250	Polr2b	polymerase (RNA) II (DNA directed) polypeptide B	0.2388	0.257287
ENSMUSG00000000278	Scpep1	serine carboxypeptidase 1	0.1543	0.257383
ENSMUSG00000020010	Vnn3	vanin 3	-0.6909	0.257506
ENSMUSG00000008200	Fnbp4	formin binding protein 4	0.328	0.257506
ENSMUSG00000031586	Rbpms	RNA binding protein gene with multiple splicing	0.7408	0.258453
ENSMUSG00000020715	Ern1	endoplasmic reticulum to nucleus signalling 1	0.6199	0.258453
ENSMUSG00000022014	Epsti1	epithelial stromal interaction 1	-0.5056	0.258453
ENSMUSG00000064181	Rab3ip	RAB3A interacting protein	0.4271	0.258453
ENSMUSG00000042328	Hps4	HPS4, biogenesis of lysosomal organelles complex 3...	-0.2234	0.258453
ENSMUSG00000031749	St3gal2	ST3 beta-galactoside alpha-2,3-sialyltransferase 2	0.4571	0.258487
ENSMUSG00000056216	Cebpg	CCAAT/enhancer binding protein gamma	0.3876	0.258487
ENSMUSG00000000902	Smarcb1	SWI/SNF related, matrix associated, actin dependen...	-0.292	0.258545
ENSMUSG00000059263	Usp47	ubiquitin specific peptidase 47	0.2588	0.258545
ENSMUSG00000022710	Usp7	ubiquitin specific peptidase 7	-0.5083	0.258556
ENSMUSG00000052456	Get3	guided entry of tail-anchored proteins factor 3, A...	-0.4422	0.258556
ENSMUSG00000032501	Trib1	tribbles pseudokinase 1	0.317	0.258556
ENSMUSG00000037933	Bicd2	BICD cargo adaptor 2	0.2595	0.258556
ENSMUSG00000021910	Nisch	nischarin	0.1945	0.258556
ENSMUSG00000022561	Gpaa1	GPI anchor attachment protein 1	0.1334	0.258556
ENSMUSG00000032403	2300009A05Rik	RIKEN cDNA 2300009A05 gene	0.9192	0.258601
ENSMUSG00000030275	Etnk1	ethanolamine kinase 1	0.3822	0.258601
ENSMUSG00000069662	Marcks	myristoylated alanine rich protein kinase C substr...	-0.3358	0.258601
ENSMUSG00000027937	Jtb	jumping translocation breakpoint	-0.3173	0.258601
ENSMUSG00000030760	Acer3	alkaline ceramidase 3	0.2356	0.258601
ENSMUSG00000029428	Stx2	syntaxin 2	0.2456	0.258994
ENSMUSG00000016637	Ift27	intraflagellar transport 27	-0.6428	0.259043
ENSMUSG00000049600	Zbtb45	zinc finger and BTB domain containing 45	0.5495	0.259043
ENSMUSG00000091102	5830462I19Rik	RIKEN cDNA 5830462I19 gene	0.4945	0.259043
ENSMUSG00000090124	Ugt1a7c	UDP glucuronosyltransferase 1 family, polypeptide ...	0.2421	0.259043
ENSMUSG00000006699	Cdc42	cell division cycle 42	-0.1729	0.260117
ENSMUSG00000040481	Bptf	bromodomain PHD finger transcription factor	-0.5088	0.260333
ENSMUSG00000040147	Maob	monoamine oxidase B	0.976	0.260391
ENSMUSG00000021357	Exoc2	exocyst complex component 2	0.2458	0.260391
ENSMUSG00000040940	Arhgef1	Rho guanine nucleotide exchange factor 1	0.2337	0.260391
ENSMUSG00000020737	Jpt1	Jupiter microtubule associated homolog 1	-0.2216	0.260391
ENSMUSG00000022884	Eif4a2	eukaryotic translation initiation factor 4A2	0.1835	0.260391
ENSMUSG00000016256	Ctsz	cathepsin Z	-0.1835	0.260527
ENSMUSG00000003134	Tbc1d8	TBC1 domain family, member 8	0.5093	0.260698
ENSMUSG00000050043	Tmx2	thioredoxin-related transmembrane protein 2	0.1801	0.262047
ENSMUSG00000025580	Eif4a3	eukaryotic translation initiation factor 4A3	-0.2304	0.262156
ENSMUSG00000037580	Gch1	GTP cyclohydrolase 1	0.561	0.264497
ENSMUSG00000068264	Ap5s1	adaptor-related protein 5 complex, sigma 1 subunit	-0.4584	0.264904
ENSMUSG00000028889	Yrdc	yrdC domain containing (E.coli)	0.8539	0.264983
ENSMUSG00000064127	Med14	mediator complex subunit 14	0.6237	0.264983
ENSMUSG00000020170	Frs2	fibroblast growth factor receptor substrate 2	0.5084	0.264983
ENSMUSG00000024382	Ercc3	excision repair cross-complementing rodent repair ...	-0.4841	0.264983
ENSMUSG00000029233	Srd5a3	steroid 5 alpha-reductase 3	0.4112	0.264983
ENSMUSG00000020409	Slu7	SLU7 splicing factor homolog (S. cerevisiae)	-0.3148	0.264983
ENSMUSG00000027366	Sppl2a	signal peptide peptidase like 2A	0.2194	0.264983
ENSMUSG00000029417	Cxcl9	C-X-C motif chemokine ligand 9	-0.7186	0.265159
ENSMUSG00000039236	Isg20	interferon-stimulated protein	-0.6994	0.265159
ENSMUSG00000003423	Pih1d1	PIH1 domain containing 1	-0.3503	0.265159
ENSMUSG00000045983	Eif4g1	eukaryotic translation initiation factor 4, gamma ...	0.1716	0.265159
ENSMUSG00000030560	Ctsc	cathepsin C	0.1308	0.265159
ENSMUSG00000004562	Arhgef40	Rho guanine nucleotide exchange factor 40	-0.2662	0.265193
ENSMUSG00000093701	Gm21970	predicted gene 21970	-0.2385	0.265591
ENSMUSG00000027995	Tlr2	toll-like receptor 2	0.1439	0.266036
ENSMUSG00000026904	Slc4a10	solute carrier family 4, sodium bicarbonate cotran...	1.191	0.267322
ENSMUSG00000017009	Sdc4	syndecan 4	0.3687	0.26753
ENSMUSG00000026972	Arrdc1	arrestin domain containing 1	-0.2498	0.268039
ENSMUSG00000032246	Calml4	calmodulin-like 4	0.9191	0.268284
ENSMUSG00000042042	Csgalnact2	chondroitin sulfate N-acetylgalactosaminyltransfer...	0.5554	0.268284
ENSMUSG00000022905	Kpna1	karyopherin subunit alpha 1	0.2345	0.268284
ENSMUSG00000024507	Hsd17b4	hydroxysteroid (17-beta) dehydrogenase 4	-0.231	0.268649
ENSMUSG00000003233	Dvl3	dishevelled segment polarity protein 3	0.5945	0.269155
ENSMUSG00000034653	Ythdc2	YTH domain containing 2	0.7019	0.269551
ENSMUSG00000039844	Rapgef1	Rap guanine nucleotide exchange factor (GEF) 1	-0.4969	0.269551
ENSMUSG00000025878	Uimc1	ubiquitin interaction motif containing 1	-0.3584	0.269551
ENSMUSG00000059890	Ube4a	ubiquitination factor E4A	0.3353	0.269551
ENSMUSG00000021124	Vti1b	vesicle transport through interaction with t-SNARE...	-0.3115	0.269551
ENSMUSG00000039852	Rere	arginine glutamic acid dipeptide (RE) repeats	-0.4796	0.269635
ENSMUSG00000047714	Ppp1r2	protein phosphatase 1, regulatory inhibitor subuni...	0.4013	0.269699
ENSMUSG00000004996	Mri1	methylthioribose-1-phosphate isomerase 1	0.6288	0.269984
ENSMUSG00000068959	Zfp619	zinc finger protein 619	0.6364	0.271004
ENSMUSG00000029780	Nt5c3	5'-nucleotidase, cytosolic III	0.4411	0.271315
ENSMUSG00000032637	Atxn2l	ataxin 2-like	0.2725	0.271315
ENSMUSG00000021638	Ocln	occludin	0.7285	0.271646
ENSMUSG00000029536	Gatc	glutamyl-tRNA amidotransferase subunit C	-0.3174	0.271646
ENSMUSG00000044583	Tlr7	toll-like receptor 7	0.2442	0.271646
ENSMUSG00000021771	Vdac2	voltage-dependent anion channel 2	-0.2228	0.271646
ENSMUSG00000010097	Nxf1	nuclear RNA export factor 1	0.1058	0.271646
ENSMUSG00000020483	Dynll2	dynein light chain LC8-type 2	0.5431	0.272496
ENSMUSG00000004567	Mcoln1	mucolipin 1	0.5365	0.272514
ENSMUSG00000037349	Nudt22	nudix hydrolase 22	-0.4318	0.272894
ENSMUSG00000045636	Mtus1	mitochondrial tumor suppressor 1	-0.1941	0.272894
ENSMUSG00000026675	Hsd17b7	hydroxysteroid (17-beta) dehydrogenase 7	0.6035	0.273651
ENSMUSG00000024425	Ndfip1	Nedd4 family interacting protein 1	0.638	0.273972
ENSMUSG00000014932	Yes1	YES proto-oncogene 1, Src family tyrosine kinase	0.4897	0.274473
ENSMUSG00000032217	Rnf111	ring finger 111	0.3951	0.2745
ENSMUSG00000049553	Polr1a	polymerase (RNA) I polypeptide A	0.2843	0.275058
ENSMUSG00000040463	Mybbp1a	MYB binding protein (P160) 1a	0.1748	0.275146
ENSMUSG00000037236	Matr3	matrin 3	0.1737	0.275368
ENSMUSG00000029147	Ppm1g	protein phosphatase 1G (formerly 2C), magnesium-de...	0.3887	0.275402
ENSMUSG00000023805	Synj2	synaptojanin 2	-0.4293	0.275999
ENSMUSG00000043336	Filip1l	filamin A interacting protein 1-like	0.5702	0.277109
ENSMUSG00000079436	Kcnj13	potassium inwardly-rectifying channel, subfamily J...	1.026	0.277501
ENSMUSG00000029415	Sdad1	SDA1 domain containing 1	0.2804	0.277501
ENSMUSG00000026966	Ssna1	SS nuclear autoantigen 1	-0.3361	0.278355
ENSMUSG00000002524	Puf60	poly-U binding splicing factor 60	-0.2159	0.278427
ENSMUSG00000043885	Slc36a4	solute carrier family 36 (proton/amino acid sympor...	0.4307	0.279253
ENSMUSG00000024180	Pgap6	post-glycosylphosphatidylinositol attachment to pr...	0.8466	0.279321
ENSMUSG00000069763	Tmem100	transmembrane protein 100	-0.3168	0.279321
ENSMUSG00000034663	Bmp2k	BMP2 inducible kinase	0.3111	0.279526
ENSMUSG00000019796	Lrp11	low density lipoprotein receptor-related protein 1...	0.9371	0.279557
ENSMUSG00000010277	Bltp2	bridge-like lipid transfer protein family member 2	0.2098	0.279557
ENSMUSG00000020448	Rnf185	ring finger protein 185	-0.3278	0.279844
ENSMUSG00000040713	Creg1	cellular repressor of E1A-stimulated genes 1	0.09571	0.28048
ENSMUSG00000087260	Lamtor5	late endosomal/lysosomal adaptor, MAPK and MTOR ac...	-0.3413	0.281278
ENSMUSG00000023104	Rfc2	replication factor C (activator 1) 2	-0.2948	0.281621
ENSMUSG00000019470	Xab2	XPA binding protein 2	-0.2375	0.281621
ENSMUSG00000041308	Sntb2	syntrophin, basic 2	0.8668	0.28302
ENSMUSG00000041921	Metap1d	methionyl aminopeptidase type 1D (mitochondrial)	0.2732	0.283288
ENSMUSG00000001270	Ckb	creatine kinase, brain	-0.2377	0.283288
ENSMUSG00000004356	Utp20	UTP20 small subunit processome component	0.4372	0.283906
ENSMUSG00000040560	Wdr7	WD repeat domain 7	0.3497	0.283906
ENSMUSG00000060733	Ipmk	inositol polyphosphate multikinase	0.5997	0.284029
ENSMUSG00000027175	Tcp11l1	t-complex 11 like 1	0.5451	0.284029
ENSMUSG00000015087	Rabl6	RAB, member RAS oncogene family-like 6	0.2936	0.284029
ENSMUSG00000044807	Zfp354c	zinc finger protein 354C	0.6973	0.284093
ENSMUSG00000024772	Ehd1	EH-domain containing 1	-0.4256	0.284093
ENSMUSG00000040327	Cul9	cullin 9	-0.4342	0.284608
ENSMUSG00000062908	Acadm	acyl-Coenzyme A dehydrogenase, medium chain	-0.2977	0.28519
ENSMUSG00000042167	Tent2	terminal nucleotidyltransferase 2	0.4973	0.285456
ENSMUSG00000038388	Pals2	protein associated with LIN7 2, MAGUK family membe...	0.6752	0.285505
ENSMUSG00000040374	Pex2	peroxisomal biogenesis factor 2	-0.2578	0.285591
ENSMUSG00000036775	Decr2	2-4-dienoyl-Coenzyme A reductase 2, peroxisomal	-0.4882	0.286204
ENSMUSG00000093456	Gm20662	predicted gene 20662	0.4472	0.286204
ENSMUSG00000078490	Cfap74	cilia and flagella associated protein 74	-0.3456	0.286204
ENSMUSG00000023977	Ubr2	ubiquitin protein ligase E3 component n-recognin 2	0.3345	0.286546
ENSMUSG00000032126	Hmbs	hydroxymethylbilane synthase	-0.31	0.287077
ENSMUSG00000017756	Slc12a7	solute carrier family 12, member 7	0.2822	0.287077
ENSMUSG00000019774	Mtrf1l	mitochondrial translational release factor 1-like	0.6886	0.287131
ENSMUSG00000033253	Szt2	SZT2 subunit of KICSTOR complex	-0.5972	0.287359
ENSMUSG00000030612	Mrpl46	mitochondrial ribosomal protein L46	-0.3871	0.287762
ENSMUSG00000026656	Fcgr2b	Fc receptor, IgG, low affinity IIb	0.09906	0.287762
ENSMUSG00000079442	St6galnac4	ST6 (alpha-N-acetyl-neuraminyl-2,3-beta-galactosyl...	-0.207	0.287773
ENSMUSG00000029561	Oasl2	2'-5' oligoadenylate synthetase-like 2	-0.8085	0.287939
ENSMUSG00000003549	Ercc1	excision repair cross-complementing rodent repair ...	-0.422	0.287939
ENSMUSG00000022992	Kansl2	KAT8 regulatory NSL complex subunit 2	0.4251	0.288378
ENSMUSG00000010110	Stx5a	syntaxin 5A	-0.2848	0.288917
ENSMUSG00000038615	Nfe2l1	nuclear factor, erythroid derived 2,-like 1	0.2073	0.288917
ENSMUSG00000056076	Eif3b	eukaryotic translation initiation factor 3, subuni...	0.5987	0.289856
ENSMUSG00000025326	Ube3a	ubiquitin protein ligase E3A	0.3909	0.290218
ENSMUSG00000035042	Ccl5	C-C motif chemokine ligand 5	-1.389	0.290587
ENSMUSG00000042595	Fam199x	family with sequence similarity 199, X-linked	0.5079	0.290713
ENSMUSG00000025283	Sat1	spermidine/spermine N1-acetyl transferase 1	-0.2491	0.290713
ENSMUSG00000015733	Capza2	capping actin protein of muscle Z-line subunit alp...	-0.1769	0.291472
ENSMUSG00000030751	Psma1	proteasome subunit alpha 1	-0.2447	0.292293
ENSMUSG00000070923	Klhl9	kelch-like 9	0.3054	0.293203
ENSMUSG00000054626	Xlr	X-linked lymphocyte-regulated	-0.4307	0.293473
ENSMUSG00000018433	Nol11	nucleolar protein 11	0.2554	0.293691
ENSMUSG00000037104	Socs5	suppressor of cytokine signaling 5	0.607	0.294019
ENSMUSG00000015165	Hnrnpl	heterogeneous nuclear ribonucleoprotein L	0.3053	0.294049
ENSMUSG00000003402	Prkcsh	protein kinase C substrate 80K-H	0.1642	0.294049
ENSMUSG00000021203	Otub2	OTU domain, ubiquitin aldehyde binding 2	0.6881	0.296019
ENSMUSG00000032571	Pik3r4	phosphoinositide-3-kinase regulatory subunit 4	0.2511	0.296019
ENSMUSG00000005034	Prkacb	protein kinase, cAMP dependent, catalytic, beta	0.2601	0.29784
ENSMUSG00000031266	Gla	galactosidase, alpha	0.5022	0.297899
ENSMUSG00000027650	Tti1	TELO2 interacting protein 1	0.2691	0.297899
ENSMUSG00000023452	Pisd	phosphatidylserine decarboxylase	0.1749	0.297899
ENSMUSG00000053559	Smagp	small cell adhesion glycoprotein	0.5341	0.298302
ENSMUSG00000019857	Asf1a	anti-silencing function 1A histone chaperone	0.5241	0.298508
ENSMUSG00000052369	Tmem106c	transmembrane protein 106C	-0.3612	0.298508
ENSMUSG00000026110	Mgat4a	mannoside acetylglucosaminyltransferase 4, isoenzy...	0.2505	0.298508
ENSMUSG00000026958	Dpp7	dipeptidylpeptidase 7	0.1818	0.298508
ENSMUSG00000045312	Lhfpl2	lipoma HMGIC fusion partner-like 2	0.1125	0.298508
ENSMUSG00000038235	F11r	F11 receptor	0.05795	0.298508
ENSMUSG00000028649	Macf1	microtubule-actin crosslinking factor 1	-0.3048	0.299721
ENSMUSG00000038910	Plcl2	phospholipase C-like 2	0.2857	0.299991
ENSMUSG00000032182	Yipf2	Yip1 domain family, member 2	-0.4411	0.300067
ENSMUSG00000047213	Ythdf3	YTH N6-methyladenosine RNA binding protein 3	0.2516	0.300067
ENSMUSG00000092305	Prps1l1	phosphoribosyl pyrophosphate synthetase 1-like 1	-1.211	0.30034
ENSMUSG00000030087	Klf15	Kruppel-like transcription factor 15	0.5922	0.300975
ENSMUSG00000037211	Spry1	sprouty RTK signaling antagonist 1	-0.504	0.301055
ENSMUSG00000020495	Smg8	SMG8 nonsense mediated mRNA decay factor	0.3212	0.30147
ENSMUSG00000037656	Slc20a2	solute carrier family 20, member 2	0.6585	0.301709
ENSMUSG00000053950	Adnp2	ADNP homeobox 2	0.3895	0.301926
ENSMUSG00000047875	Gpr157	G protein-coupled receptor 157	0.383	0.301926
ENSMUSG00000006418	Rnf114	ring finger protein 114	-0.2174	0.301926
ENSMUSG00000058355	Abce1	ATP-binding cassette, sub-family E member 1	0.1991	0.301926
ENSMUSG00000092470	Gm20518	predicted gene 20518	0.3029	0.301963
ENSMUSG00000024483	Ankhd1	ankyrin repeat and KH domain containing 1	0.2515	0.30208
ENSMUSG00000038116	Phf20	PHD finger protein 20	-0.3598	0.302294
ENSMUSG00000021282	Eif5	eukaryotic translation initiation factor 5	0.2906	0.302438
ENSMUSG00000034462	Pkd2	polycystin 2, transient receptor potential cation ...	0.5597	0.302554
ENSMUSG00000004902	Slc25a18	solute carrier family 25 (mitochondrial carrier), ...	0.343	0.303073
ENSMUSG00000022899	Slc15a2	solute carrier family 15 (H+/peptide transporter),...	0.909	0.30317
ENSMUSG00000042246	Tmc7	transmembrane channel-like gene family 7	0.437	0.30317
ENSMUSG00000024960	Plcb3	phospholipase C, beta 3	0.3988	0.30317
ENSMUSG00000026618	Iars2	isoleucine-tRNA synthetase 2, mitochondrial	0.3002	0.30317
ENSMUSG00000019054	Fis1	fission, mitochondrial 1	-0.2881	0.303737
ENSMUSG00000068267	Cenpb	centromere protein B	-0.774	0.303789
ENSMUSG00000038650	Rnh1	ribonuclease/angiogenin inhibitor 1	-0.227	0.304038
ENSMUSG00000041231	Ublcp1	ubiquitin-like domain containing CTD phosphatase 1	-0.4037	0.304084
ENSMUSG00000030486	Zfp108	zinc finger protein 108	-0.835	0.304614
ENSMUSG00000038811	Gngt2	guanine nucleotide binding protein (G protein), ga...	-0.2401	0.304649
ENSMUSG00000036469	Marchf1	membrane associated ring-CH-type finger 1	0.1556	0.304649
ENSMUSG00000063193	Cd300lb	CD300 molecule like family member B	0.5159	0.304943
ENSMUSG00000002265	Peg3	paternally expressed 3	0.7651	0.3053
ENSMUSG00000020193	Zpbp	zona pellucida binding protein	0.4547	0.3053
ENSMUSG00000063019	Manbal	mannosidase, beta A, lysosomal-like	-0.3958	0.3053
ENSMUSG00000057329	Bcl2	B cell leukemia/lymphoma 2	0.5628	0.305316
ENSMUSG00000025076	Casp7	caspase 7	-0.6144	0.305577
ENSMUSG00000003662	Ciao1	cytosolic iron-sulfur protein assembly 1	-0.331	0.305577
ENSMUSG00000022514	Il1rap	interleukin 1 receptor accessory protein	0.4671	0.306778
ENSMUSG00000030007	Cct7	chaperonin containing TCP1 subunit 7	-0.2715	0.307104
ENSMUSG00000032988	Slc16a8	solute carrier family 16 (monocarboxylic acid tran...	0.7774	0.307155
ENSMUSG00000027834	Serpini1	serine (or cysteine) peptidase inhibitor, clade I,...	0.6627	0.307155
ENSMUSG00000042182	Bend6	BEN domain containing 6	-0.5383	0.307395
ENSMUSG00000021024	Psma6	proteasome subunit alpha 6	-0.2472	0.309271
ENSMUSG00000028830	AU040320	expressed sequence AU040320	0.1808	0.310866
ENSMUSG00000043702	Pde12	phosphodiesterase 12	0.3582	0.311414
ENSMUSG00000073684	Faap20	Fanconi anemia core complex associated protein 20	-0.3571	0.311414
ENSMUSG00000027628	Aar2	AAR2 splicing factor homolog	-0.3025	0.311414
ENSMUSG00000020114	Cand1	cullin associated and neddylation disassociated 1	0.2747	0.312848
ENSMUSG00000027035	Cers6	ceramide synthase 6	0.3697	0.313846
ENSMUSG00000030199	Etv6	ets variant 6	0.2032	0.315399
ENSMUSG00000029167	Ppargc1a	peroxisome proliferative activated receptor, gamma...	1.021	0.315794
ENSMUSG00000025885	Myo5b	myosin VB	0.9214	0.315794
ENSMUSG00000031776	Arl2bp	ADP-ribosylation factor-like 2 binding protein	0.5504	0.315794
ENSMUSG00000020709	Adap2	ArfGAP with dual PH domains 2	-0.2684	0.315794
ENSMUSG00000030447	Cyfip1	cytoplasmic FMR1 interacting protein 1	0.1036	0.316239
ENSMUSG00000003437	Paf1	Paf1, RNA polymerase II complex component	-0.2855	0.316615
ENSMUSG00000001211	Agpat3	1-acylglycerol-3-phosphate O-acyltransferase 3	0.2637	0.316615
ENSMUSG00000006024	Napa	N-ethylmaleimide sensitive fusion protein attachme...	-0.2047	0.317215
ENSMUSG00000048701	Ccdc6	coiled-coil domain containing 6	-0.6852	0.317257
ENSMUSG00000019254	Ppp1r12c	protein phosphatase 1, regulatory subunit 12C	-0.4776	0.317603
ENSMUSG00000002342	Tmem161a	transmembrane protein 161A	0.2254	0.317758
ENSMUSG00000051223	Bzw1	basic leucine zipper and W2 domains 1	0.1208	0.317787
ENSMUSG00000039989	Cbx4	chromobox 4	0.6293	0.318463
ENSMUSG00000038685	Rtel1	regulator of telomere elongation helicase 1	0.5217	0.318515
ENSMUSG00000026701	Prdx6	peroxiredoxin 6	-0.3929	0.318515
ENSMUSG00000018171	Vmp1	vacuole membrane protein 1	0.1557	0.319118
ENSMUSG00000034602	Mon2	MON2 homolog, regulator of endosome to Golgi traff...	-0.4798	0.319903
ENSMUSG00000064267	Hvcn1	hydrogen voltage-gated channel 1	-0.185	0.320104
ENSMUSG00000032553	Srprb	signal recognition particle receptor, B subunit	0.1588	0.320183
ENSMUSG00000076431	Sox4	SRY (sex determining region Y)-box 4	0.8898	0.320366
ENSMUSG00000026896	Ifih1	interferon induced with helicase C domain 1	-0.5704	0.320394
ENSMUSG00000068284	Usf3	upstream transcription factor family member 3	-0.7158	0.320825
ENSMUSG00000022124	Fbxl3	F-box and leucine-rich repeat protein 3	0.3559	0.321389
ENSMUSG00000024908	Ppp6r3	protein phosphatase 6, regulatory subunit 3	0.2045	0.321841
ENSMUSG00000028917	Plekhm2	pleckstrin homology domain containing, family M (w...	-0.5171	0.321962
ENSMUSG00000033382	Trappc8	trafficking protein particle complex 8	0.4518	0.322013
ENSMUSG00000031788	Kifc3	kinesin family member C3	0.6099	0.322222
ENSMUSG00000051329	Nup160	nucleoporin 160	0.3159	0.322352
ENSMUSG00000024969	Mark2	MAP/microtubule affinity regulating kinase 2	0.2927	0.322352
ENSMUSG00000046844	Vat1l	vesicle amine transport protein 1 like	1.24	0.323149
ENSMUSG00000051586	Mical3	microtubule associated monooxygenase, calponin and...	-0.764	0.323149
ENSMUSG00000078185	Chml	choroideremia-like	0.71	0.323361
ENSMUSG00000021610	Clptm1l	CLPTM1-like	0.4766	0.323657
ENSMUSG00000059326	Csf2ra	colony stimulating factor 2 receptor, alpha, low-a...	0.3691	0.323718
ENSMUSG00000004788	Eif2b2	eukaryotic translation initiation factor 2B, subun...	-0.3287	0.32459
ENSMUSG00000038812	Trmt112	tRNA methyltransferase 11-2	-0.3195	0.324825
ENSMUSG00000025132	Arhgdia	Rho GDP dissociation inhibitor alpha	-0.1465	0.324969
ENSMUSG00000022210	Dhrs4	dehydrogenase/reductase 4	-0.4925	0.326701
ENSMUSG00000033444	Specc1l	sperm antigen with calponin homology and coiled-co...	0.386	0.326701
ENSMUSG00000009647	Mcu	mitochondrial calcium uniporter	0.6068	0.32723
ENSMUSG00000039450	Dcxr	dicarbonyl L-xylulose reductase	-0.3697	0.328755
ENSMUSG00000025337	Sbds	SBDS ribosome maturation factor	-0.3196	0.328755
ENSMUSG00000020528	Prpsap2	phosphoribosyl pyrophosphate synthetase-associated...	-0.3167	0.328755
ENSMUSG00000041560	Nop53	NOP53 ribosome biogenesis factor	-0.2807	0.328755
ENSMUSG00000016921	Srsf6	serine and arginine-rich splicing factor 6	0.4063	0.329479
ENSMUSG00000023932	Cdc5l	cell division cycle 5-like	-0.3179	0.329479
ENSMUSG00000029672	Fam3c	FAM3 metabolism regulating signaling molecule C	0.2563	0.32974
ENSMUSG00000022837	Iqcb1	IQ calmodulin-binding motif containing 1	-0.642	0.330103
ENSMUSG00000025375	Aatk	apoptosis-associated tyrosine kinase	0.6384	0.33115
ENSMUSG00000078931	Pdf	peptide deformylase (mitochondrial)	0.393	0.331153
ENSMUSG00000042719	Naa25	N(alpha)-acetyltransferase 25, NatB auxiliary subu...	0.2124	0.331153
ENSMUSG00000022214	Dcaf11	DDB1 and CUL4 associated factor 11	-0.2678	0.331293
ENSMUSG00000060032	H2aj	H2J.A histone	0.5407	0.331763
ENSMUSG00000039910	Cited2	Cbp/p300-interacting transactivator, with Glu/Asp-...	0.61	0.331913
ENSMUSG00000030680	Pagr1a	PAXIP1 associated glutamate rich protein 1A	-0.3198	0.331913
ENSMUSG00000023852	Chd1	chromodomain helicase DNA binding protein 1	0.5069	0.333063
ENSMUSG00000053897	Slc39a8	solute carrier family 39 (metal ion transporter), ...	0.3239	0.333308
ENSMUSG00000062963	Ufc1	ubiquitin-fold modifier conjugating enzyme 1	-0.3939	0.333732
ENSMUSG00000022346	Myc	myelocytomatosis oncogene	0.1855	0.333732
ENSMUSG00000027884	Clcc1	chloride channel CLIC-like 1	0.1695	0.333732
ENSMUSG00000040209	Zfp704	zinc finger protein 704	-0.9083	0.334297
ENSMUSG00000006281	Tep1	telomerase associated protein 1	-0.3527	0.334946
ENSMUSG00000029802	Abcg2	ATP binding cassette subfamily G member 2 (Junior ...	0.2733	0.334946
ENSMUSG00000022828	Gtf2e1	general transcription factor II E, polypeptide 1 (...	0.3535	0.335138
ENSMUSG00000025316	Banp	BTG3 associated nuclear protein	-0.3729	0.335176
ENSMUSG00000048578	Mlec	malectin	0.1961	0.33665
ENSMUSG00000044948	Cfap43	cilia and flagella associated protein 43	0.3421	0.33668
ENSMUSG00000054079	Utp18	UTP18 small subunit processome component	0.4302	0.336894
ENSMUSG00000040820	Hlcs	holocarboxylase synthetase (biotin- [propriony-Coe...	0.8695	0.336921
ENSMUSG00000035399	Oser1	oxidative stress responsive serine rich 1	-0.3528	0.336921
ENSMUSG00000054263	Lifr	LIF receptor alpha	0.2682	0.336921
ENSMUSG00000028329	Xpa	xeroderma pigmentosum, complementation group A	0.5075	0.337291
ENSMUSG00000020400	Tnip1	TNFAIP3 interacting protein 1	-0.4955	0.337402
ENSMUSG00000031156	Slc35a2	solute carrier family 35 (UDP-galactose transporte...	0.2639	0.337907
ENSMUSG00000020496	Rnf187	ring finger protein 187	0.6994	0.33845
ENSMUSG00000016918	Sulf1	sulfatase 1	0.8609	0.338852
ENSMUSG00000003032	Klf4	Kruppel-like transcription factor 4 (gut)	-0.5792	0.338852
ENSMUSG00000001419	Mef2d	myocyte enhancer factor 2D	0.2898	0.338852
ENSMUSG00000033124	Atg9a	autophagy related 9A	0.2797	0.338852
ENSMUSG00000021273	Fdft1	farnesyl diphosphate farnesyl transferase 1	0.2478	0.338852
ENSMUSG00000056999	Ide	insulin degrading enzyme	0.2271	0.338852
ENSMUSG00000037958	Nsrp1	nuclear speckle regulatory protein 1	-0.3764	0.338989
ENSMUSG00000027472	Pdrg1	p53 and DNA damage regulated 1	-0.3017	0.339408
ENSMUSG00000032020	Ubash3b	ubiquitin associated and SH3 domain containing, B	0.1755	0.339762
ENSMUSG00000009549	Srp14	signal recognition particle 14	-0.3003	0.340154
ENSMUSG00000040296	Rigi	RNA sensor RIG-I	-0.4106	0.34031
ENSMUSG00000057637	Prdm2	PR domain containing 2, with ZNF domain	-0.496	0.340823
ENSMUSG00000009555	Cdk9	cyclin dependent kinase 9	0.3883	0.340851
ENSMUSG00000041135	Ripk2	receptor (TNFRSF)-interacting serine-threonine kin...	0.3621	0.340851
ENSMUSG00000035967	Ints6l	integrator complex subunit 6 like	0.2008	0.340851
ENSMUSG00000090035	Galnt4	polypeptide N-acetylgalactosaminyltransferase 4	0.2479	0.341752
ENSMUSG00000054720	Lrrc8c	leucine rich repeat containing 8 family, member C	0.7861	0.341988
ENSMUSG00000038335	Tsr1	TSR1 20S rRNA accumulation	0.2921	0.343007
ENSMUSG00000006731	B4galnt1	beta-1,4-N-acetyl-galactosaminyl transferase 1	0.216	0.343224
ENSMUSG00000038481	Cdk19	cyclin dependent kinase 19	0.3217	0.343841
ENSMUSG00000040270	Bach2	BTB and CNC homology, basic leucine zipper transcr...	-0.4139	0.344609
ENSMUSG00000018906	P4ha2	procollagen-proline, 2-oxoglutarate 4-dioxygenase ...	0.6795	0.34496
ENSMUSG00000037921	Ddx60	DExD/H box helicase 60	-0.6591	0.34496
ENSMUSG00000024048	Myl12a	myosin, light chain 12A, regulatory, non-sarcomeri...	-0.2369	0.34496
ENSMUSG00000004730	Adgre1	adhesion G protein-coupled receptor E1	0.1043	0.345634
ENSMUSG00000032030	Cul5	cullin 5	0.3481	0.345885
ENSMUSG00000029925	Tbxas1	thromboxane A synthase 1, platelet	0.1502	0.346994
ENSMUSG00000046879	Irgm1	immunity-related GTPase family M member 1	-0.3021	0.347767
ENSMUSG00000030921	Trim30a	tripartite motif-containing 30A	-0.2898	0.347767
ENSMUSG00000080268	Brms1	breast cancer metastasis-suppressor 1	-0.2785	0.347767
ENSMUSG00000018927	Ccl6	C-C motif chemokine ligand 6	0.2614	0.347767
ENSMUSG00000037369	Kdm6a	lysine (K)-specific demethylase 6A	0.4113	0.348565
ENSMUSG00000040811	Eml2	echinoderm microtubule associated protein like 2	0.9689	0.34938
ENSMUSG00000025921	Rdh10	retinol dehydrogenase 10 (all-trans)	0.5549	0.34938
ENSMUSG00000063362	Alg11	ALG11 alpha-1,2-mannosyltransferase	0.3388	0.34938
ENSMUSG00000029472	Anapc5	anaphase-promoting complex subunit 5	-0.2	0.34938
ENSMUSG00000073489	Ifi204	interferon activated gene 204	-0.5157	0.349755
ENSMUSG00000005625	Psmd4	proteasome (prosome, macropain) 26S subunit, non-A...	-0.2225	0.350932
ENSMUSG00000024130	Abca3	ATP-binding cassette, sub-family A member 3	0.2768	0.35135
ENSMUSG00000029467	Atp2a2	ATPase, Ca++ transporting, cardiac muscle, slow tw...	0.27	0.35135
ENSMUSG00000035561	Aldh1b1	aldehyde dehydrogenase 1 family, member B1	-0.9008	0.35148
ENSMUSG00000028683	Eif2b3	eukaryotic translation initiation factor 2B, subun...	-0.3532	0.351839
ENSMUSG00000027185	Nat10	N-acetyltransferase 10	0.2285	0.351839
ENSMUSG00000025855	Prkar1b	protein kinase, cAMP dependent regulatory, type I ...	-0.459	0.351964
ENSMUSG00000018796	Acsl1	acyl-CoA synthetase long-chain family member 1	0.2654	0.352568
ENSMUSG00000066442	Mthfs	5, 10-methenyltetrahydrofolate synthetase	-0.4077	0.352628
ENSMUSG00000028546	Elavl4	ELAV like RNA binding protein 4	-0.8926	0.352707
ENSMUSG00000044811	Cd300c2	CD300C molecule 2	-0.246	0.35371
ENSMUSG00000022555	Dgat1	diacylglycerol O-acyltransferase 1	0.2684	0.353711
ENSMUSG00000024687	Osbp	oxysterol binding protein	-0.5426	0.353961
ENSMUSG00000025147	Mob2	MOB kinase activator 2	-0.3827	0.353961
ENSMUSG00000038056	Kmt2c	lysine (K)-specific methyltransferase 2C	-0.3295	0.355025
ENSMUSG00000045248	Med26	mediator complex subunit 26	0.4014	0.355573
ENSMUSG00000033417	Cacul1	CDK2 associated, cullin domain 1	0.3972	0.356392
ENSMUSG00000096953	Gm26571	predicted gene, 26571	0.8886	0.356413
ENSMUSG00000026536	Ifi211	interferon activated gene 211	-0.7428	0.356413
ENSMUSG00000025262	Fam120c	family with sequence similarity 120, member C	0.7113	0.356413
ENSMUSG00000035890	Rnf126	ring finger protein 126	0.5809	0.356413
ENSMUSG00000019927	Ube2d1	ubiquitin-conjugating enzyme E2D 1	0.4049	0.356413
ENSMUSG00000033216	Eefsec	eukaryotic elongation factor, selenocysteine-tRNA-...	-0.2897	0.356413
ENSMUSG00000028484	Psip1	PC4 and SFRS1 interacting protein 1	0.7014	0.35651
ENSMUSG00000022797	Tfrc	transferrin receptor	0.3185	0.357221
ENSMUSG00000002658	Gtf2f1	general transcription factor IIF, polypeptide 1	-0.2515	0.357221
ENSMUSG00000025162	Csnk1d	casein kinase 1, delta	0.2117	0.358596
ENSMUSG00000028675	Pnrc2	proline-rich nuclear receptor coactivator 2	-0.2835	0.358728
ENSMUSG00000061731	Ext1	exostosin glycosyltransferase 1	-0.7069	0.358745
ENSMUSG00000040123	Zmym5	zinc finger, MYM-type 5	-0.4169	0.358745
ENSMUSG00000041548	Hspb8	heat shock protein 8	1.042	0.359419
ENSMUSG00000099908	Gm28539	predicted gene 28539	-0.6079	0.359419
ENSMUSG00000002983	Relb	avian reticuloendotheliosis viral (v-rel) oncogene...	0.4566	0.359419
ENSMUSG00000047434	Xxylt1	xyloside xylosyltransferase 1	0.6341	0.35959
ENSMUSG00000017428	Psmd11	proteasome (prosome, macropain) 26S subunit, non-A...	-0.2298	0.360501
ENSMUSG00000032612	Usp4	ubiquitin specific peptidase 4 (proto-oncogene)	0.1198	0.360501
ENSMUSG00000026181	Ppm1f	protein phosphatase 1F (PP2C domain containing)	0.236	0.360641
ENSMUSG00000056342	Usp34	ubiquitin specific peptidase 34	-0.359	0.361809
ENSMUSG00000029617	Ccz1	CCZ1 vacuolar protein trafficking and biogenesis a...	-0.2998	0.362573
ENSMUSG00000009291	Pttg1ip	pituitary tumor-transforming 1 interacting protein	0.08361	0.362573
ENSMUSG00000001175	Calm1	calmodulin 1	-0.2706	0.36263
ENSMUSG00000064345	ND2	NADH dehydrogenase subunit 2	0.285	0.363
ENSMUSG00000026817	Ak1	adenylate kinase 1	-0.3503	0.363238
ENSMUSG00000087006	Gm13889	predicted gene 13889	1.064	0.363716
ENSMUSG00000040850	Psme4	proteasome (prosome, macropain) activator subunit ...	-0.5265	0.363716
ENSMUSG00000026153	Fam135a	family with sequence similarity 135, member A	0.5068	0.363716
ENSMUSG00000045752	Tssc4	tumor-suppressing subchromosomal transferable frag...	-0.3115	0.363716
ENSMUSG00000038371	Sbf2	SET binding factor 2	0.2353	0.363716
ENSMUSG00000029385	Ccng2	cyclin G2	0.3229	0.363747
ENSMUSG00000006058	Snf8	SNF8, ESCRT-II complex subunit, homolog (S. cerevi...	-0.3769	0.363904
ENSMUSG00000026637	Traf5	TNF receptor-associated factor 5	-0.3413	0.363937
ENSMUSG00000005958	Ephb3	Eph receptor B3	0.6455	0.364337
ENSMUSG00000024081	Cebpz	CCAAT/enhancer binding protein zeta	-0.2352	0.364497
ENSMUSG00000036992	Nxt1	NTF2-related export protein 1	-0.4023	0.36464
ENSMUSG00000075419	Dolk	dolichol kinase	0.2467	0.36464
ENSMUSG00000003849	Nqo1	NAD(P)H dehydrogenase, quinone 1	0.7968	0.364732
ENSMUSG00000035572	Dcaf10	DDB1 and CUL4 associated factor 10	0.5539	0.364732
ENSMUSG00000047649	Polr1g	RNA polymerase I subunit G	-0.4049	0.364732
ENSMUSG00000024181	Mrpl28	mitochondrial ribosomal protein L28	-0.3063	0.364732
ENSMUSG00000027030	Stk39	serine/threonine kinase 39	0.9861	0.364929
ENSMUSG00000033998	Kcnk1	potassium channel, subfamily K, member 1	0.8787	0.364929
ENSMUSG00000002957	Ap2a2	adaptor-related protein complex 2, alpha 2 subunit	0.255	0.364929
ENSMUSG00000014773	Dll1	delta like canonical Notch ligand 1	0.7513	0.365799
ENSMUSG00000019806	Aig1	androgen-induced 1	0.4105	0.365799
ENSMUSG00000031974	Abcb10	ATP-binding cassette, sub-family B member 10	0.3729	0.365799
ENSMUSG00000073139	Tmem185a	transmembrane protein 185A	0.2608	0.365799
ENSMUSG00000031834	Pik3r2	phosphoinositide-3-kinase regulatory subunit 2	0.1946	0.365799
ENSMUSG00000034022	Cpsf1	cleavage and polyadenylation specific factor 1	0.1483	0.365799
ENSMUSG00000030088	Aldh1l1	aldehyde dehydrogenase 1 family, member L1	0.7914	0.365807
ENSMUSG00000017715	Pgs1	phosphatidylglycerophosphate synthase 1	0.3978	0.365862
ENSMUSG00000041707	Tmem273	transmembrane protein 273	-0.28	0.365862
ENSMUSG00000030757	Zkscan2	zinc finger with KRAB and SCAN domains 2	0.7296	0.365883
ENSMUSG00000043487	Acot6	acyl-CoA thioesterase 6	0.6665	0.365956
ENSMUSG00000078202	Nrarp	Notch-regulated ankyrin repeat protein	0.55	0.366268
ENSMUSG00000033004	Mycbp2	MYC binding protein 2, E3 ubiquitin protein ligase	-0.3742	0.366731
ENSMUSG00000079427	Mthfsl	5, 10-methenyltetrahydrofolate synthetase-like	-0.4415	0.366946
ENSMUSG00000032215	Rsl24d1	ribosomal L24 domain containing 1	-0.3396	0.366964
ENSMUSG00000026249	Serpine2	serine (or cysteine) peptidase inhibitor, clade E,...	0.1206	0.366964
ENSMUSG00000024248	Cox7a2l	cytochrome c oxidase subunit 7A2 like	-0.35	0.367471
ENSMUSG00000014195	Dnajc7	DnaJ heat shock protein family (Hsp40) member C7	-0.2076	0.367471
ENSMUSG00000027878	Notch2	notch 2	0.2987	0.367627
ENSMUSG00000030235	Slco1c1	solute carrier organic anion transporter family, m...	0.8773	0.367707
ENSMUSG00000090840	Tex54	testis expressed 54	-0.5114	0.368004
ENSMUSG00000068859	Sp9	trans-acting transcription factor 9	-0.4706	0.368004
ENSMUSG00000026946	Nmi	N-myc (and STAT) interactor	-0.4064	0.368004
ENSMUSG00000029075	Tnfrsf4	tumor necrosis factor receptor superfamily, member...	-0.3444	0.368004
ENSMUSG00000036948	Trappc14	trafficking protein particle complex 14	0.2798	0.368004
ENSMUSG00000017679	Ttpal	tocopherol (alpha) transfer protein-like	0.2331	0.368004
ENSMUSG00000039263	Npepl1	aminopeptidase-like 1	0.3046	0.36862
ENSMUSG00000000530	Acvrl1	activin A receptor, type II-like 1	0.2356	0.36862
ENSMUSG00000062310	Glrp1	glutamine repeat protein 1	-0.6252	0.369645
ENSMUSG00000003863	Ppfia3	protein tyrosine phosphatase, receptor type, f pol...	-0.5259	0.369679
ENSMUSG00000031220	Awat2	acyl-CoA wax alcohol acyltransferase 2	-0.6309	0.369877
ENSMUSG00000059891	Tsks	testis-specific serine kinase substrate	-0.6217	0.369877
ENSMUSG00000043017	Ptgir	prostaglandin I receptor (IP)	-0.5502	0.369877
ENSMUSG00000063953	Amd2	S-adenosylmethionine decarboxylase 2	-0.2527	0.369877
ENSMUSG00000051457	Spn	sialophorin	-0.2514	0.369877
ENSMUSG00000035847	Ids	iduronate 2-sulfatase	0.2218	0.369877
ENSMUSG00000018326	Ywhab	tyrosine 3-monooxygenase/tryptophan 5-monooxygenas...	0.2576	0.370241
ENSMUSG00000004040	Stat3	signal transducer and activator of transcription 3	0.09563	0.370241
ENSMUSG00000051498	Tlr6	toll-like receptor 6	0.3013	0.3703
ENSMUSG00000027956	Tmem144	transmembrane protein 144	0.2782	0.3703
ENSMUSG00000021134	Srsf5	serine and arginine-rich splicing factor 5	0.1353	0.3703
ENSMUSG00000058925	Ccdc192	coiled-coil domain containing 192	-0.238	0.370352
ENSMUSG00000004815	Dgkq	diacylglycerol kinase, theta	0.2436	0.370438
ENSMUSG00000091811	Inafm1	InaF motif containing 1	0.7711	0.370519
ENSMUSG00000026248	Mrpl44	mitochondrial ribosomal protein L44	-0.4013	0.370661
ENSMUSG00000008999	Bmp7	bone morphogenetic protein 7	0.9132	0.371421
ENSMUSG00000046093	Hpcal4	hippocalcin-like 4	-0.6972	0.371421
ENSMUSG00000055235	Wdr86	WD repeat domain 86	0.5245	0.371421
ENSMUSG00000035824	Tk2	thymidine kinase 2, mitochondrial	-0.26	0.372166
ENSMUSG00000027452	Acss1	acyl-CoA synthetase short-chain family member 1	0.1758	0.372166
ENSMUSG00000039217	Il18	interleukin 18	-0.4175	0.372435
ENSMUSG00000041168	Lonp1	lon peptidase 1, mitochondrial	0.5139	0.372495
ENSMUSG00000047141	Zfp654	zinc finger protein 654	0.4616	0.373011
ENSMUSG00000039461	Tcta	T cell leukemia translocation altered gene	-0.3999	0.373011
ENSMUSG00000031778	Cx3cl1	C-X3-C motif chemokine ligand 1	0.9081	0.373312
ENSMUSG00000056174	Col8a2	collagen, type VIII, alpha 2	0.787	0.373721
ENSMUSG00000044098	Rsbn1	rosbin, round spermatid basic protein 1	0.3472	0.373721
ENSMUSG00000002833	Hdgfl2	HDGF like 2	-0.258	0.373721
ENSMUSG00000026080	Chst10	carbohydrate sulfotransferase 10	0.7132	0.373962
ENSMUSG00000030534	Vps33b	vacuolar protein sorting 33B	0.2554	0.373962
ENSMUSG00000016481	Cr1l	complement C3b/C4b receptor 1 like	0.1826	0.373962
ENSMUSG00000026433	Rab29	RAB29, member RAS oncogene family	-0.4228	0.374525
ENSMUSG00000020522	Mfap3	microfibrillar-associated protein 3	0.113	0.374525
ENSMUSG00000017299	Dnttip1	deoxynucleotidyltransferase, terminal, interacting...	0.5913	0.374753
ENSMUSG00000040389	Wdr47	WD repeat domain 47	0.4383	0.376354
ENSMUSG00000035125	Gcfc2	GC-rich sequence DNA binding factor 2	0.6054	0.376683
ENSMUSG00000018661	Cog1	component of oligomeric golgi complex 1	0.4257	0.376683
ENSMUSG00000013523	Bcas1	brain enriched myelin associated protein 1	-0.5583	0.377312
ENSMUSG00000089824	Rbm12	RNA binding motif protein 12	0.282	0.377312
ENSMUSG00000048756	Foxo3	forkhead box O3	-0.633	0.378288
ENSMUSG00000036980	Taf6	TATA-box binding protein associated factor 6	-0.2763	0.378288
ENSMUSG00000027522	Stx16	syntaxin 16	-0.3944	0.378793
ENSMUSG00000048930	Tada3	transcriptional adaptor 3	-0.3376	0.37958
ENSMUSG00000047671	Dynlt4	dynein light chain Tctex-type 4	-0.4802	0.379868
ENSMUSG00000026193	Fn1	fibronectin 1	-0.5783	0.38042
ENSMUSG00000009214	Mymk	myomaker, myoblast fusion factor	-0.4975	0.381997
ENSMUSG00000021983	Atp8a2	ATPase, aminophospholipid transporter-like, class ...	0.1856	0.383935
ENSMUSG00000035559	Mpv17l2	MPV17 mitochondrial membrane protein-like 2	0.5896	0.38405
ENSMUSG00000022052	Ppp2r2a	protein phosphatase 2, regulatory subunit B, alpha	0.3073	0.384868
ENSMUSG00000055850	Rnf181	ring finger protein 181	-0.3061	0.384868
ENSMUSG00000038416	Cdc16	CDC16 cell division cycle 16	0.2454	0.384868
ENSMUSG00000024498	Tcerg1	transcription elongation regulator 1 (CA150)	0.2347	0.384868
ENSMUSG00000033159	Cnppd1	cyclin Pas1/PHO80 domain containing 1	0.1426	0.384868
ENSMUSG00000026930	Gpsm1	G-protein signalling modulator 1 (AGS3-like, C. el...	0.2842	0.385641
ENSMUSG00000028163	Nfkb1	nuclear factor of kappa light polypeptide gene enh...	-0.2593	0.387107
ENSMUSG00000049382	Krt8	keratin 8	0.7947	0.3873
ENSMUSG00000016946	Kctd5	potassium channel tetramerisation domain containin...	0.4456	0.387933
ENSMUSG00000028461	Ccdc107	coiled-coil domain containing 107	-0.3618	0.388653
ENSMUSG00000028884	Rpa2	replication protein A2	-0.3638	0.3904
ENSMUSG00000087370	Tmem170b	transmembrane protein 170B	0.2527	0.3904
ENSMUSG00000032067	Pts	6-pyruvoyl-tetrahydropterin synthase	-0.3475	0.390987
ENSMUSG00000071655	Ubxn1	UBX domain protein 1	-0.3004	0.391846
ENSMUSG00000039254	Pomt1	protein-O-mannosyltransferase 1	0.2352	0.391846
ENSMUSG00000036733	Rbm42	RNA binding motif protein 42	-0.2248	0.391846
ENSMUSG00000030744	Rps3	ribosomal protein S3	-0.2037	0.391992
ENSMUSG00000020088	Sar1a	secretion associated Ras related GTPase 1A	0.1356	0.391992
ENSMUSG00000021843	Ktn1	kinectin 1	0.2006	0.392321
ENSMUSG00000038605	Samd10	sterile alpha motif domain containing 10	0.6251	0.392593
ENSMUSG00000004054	Map3k11	mitogen-activated protein kinase kinase kinase 11	0.3955	0.392593
ENSMUSG00000036461	Elf1	E74 like ETS transcription factor 1	0.1803	0.393165
ENSMUSG00000020628	Trappc12	trafficking protein particle complex 12	0.1897	0.393641
ENSMUSG00000023048	Prr13	proline rich 13	-0.3451	0.393747
ENSMUSG00000006288	Ttc5	tetratricopeptide repeat domain 5	-0.2704	0.393976
ENSMUSG00000027381	Bcl2l11	BCL2 like 11	0.3276	0.394002
ENSMUSG00000065990	Aurkaip1	aurora kinase A interacting protein 1	-0.3135	0.3942
ENSMUSG00000002992	Apoc2	apolipoprotein C2	-0.7171	0.394785
ENSMUSG00000054545	Ugt1a6a	UDP glucuronosyltransferase 1 family, polypeptide ...	0.2197	0.394785
ENSMUSG00000041570	Camsap2	calmodulin regulated spectrin-associated protein f...	0.4873	0.39501
ENSMUSG00000032487	Ptgs2	prostaglandin-endoperoxide synthase 2	0.5988	0.395265
ENSMUSG00000042472	Zfp410	zinc finger protein 410	-0.2984	0.395698
ENSMUSG00000029217	Tec	tec protein tyrosine kinase	-0.2642	0.395698
ENSMUSG00000002949	Timm44	translocase of inner mitochondrial membrane 44	-0.3005	0.396559
ENSMUSG00000006390	Elovl1	ELOVL fatty acid elongase 1	0.1485	0.396559
ENSMUSG00000041849	Card6	caspase recruitment domain family, member 6	-0.4042	0.396711
ENSMUSG00000022105	Rb1	RB transcriptional corepressor 1	-0.2551	0.396711
ENSMUSG00000031802	Phxr4	per-hexamer repeat gene 4	-0.7827	0.396829
ENSMUSG00000101892	9130401M01Rik	RIKEN cDNA 9130401M01 gene	-0.4282	0.397275
ENSMUSG00000029625	Cpsf4	cleavage and polyadenylation specific factor 4	-0.3416	0.397275
ENSMUSG00000024493	Lars1	leucyl-tRNA synthetase 1	0.1532	0.397275
ENSMUSG00000041642	Kif21b	kinesin family member 21B	-0.3262	0.397499
ENSMUSG00000030352	Tspan9	tetraspanin 9	0.3316	0.397781
ENSMUSG00000091191	Gm17334	predicted gene, 17334	-0.4947	0.397898
ENSMUSG00000000326	Comt	catechol-O-methyltransferase	-0.2154	0.397898
ENSMUSG00000063904	Dpp3	dipeptidylpeptidase 3	0.1429	0.397898
ENSMUSG00000004633	Chn2	chimerin 2	0.2703	0.39802
ENSMUSG00000066232	Ipo7	importin 7	0.4346	0.398658
ENSMUSG00000032194	Kank2	KN motif and ankyrin repeat domains 2	0.6922	0.399356
ENSMUSG00000022702	Hira	histone cell cycle regulator	-0.929	0.400212
ENSMUSG00000060227	Golm2	golgi membrane protein 2	0.7925	0.400212
ENSMUSG00000020638	Cmpk2	cytidine/uridine monophosphate kinase 2	-0.6795	0.400212
ENSMUSG00000027569	Mrgbp	MRG/MORF4L binding protein	-0.3605	0.400212
ENSMUSG00000062580	Timm17a	translocase of inner mitochondrial membrane 17a	-0.3025	0.400212
ENSMUSG00000026810	Dpm2	dolichyl-phosphate mannosyltransferase subunit 2, ...	-0.2992	0.400212
ENSMUSG00000042726	Trafd1	TRAF type zinc finger domain containing 1	-0.2399	0.400212
ENSMUSG00000090171	Ugt1a2	UDP glucuronosyltransferase 1 family, polypeptide ...	0.221	0.400212
ENSMUSG00000001415	Smg5	SMG5 nonsense mediated mRNA decay factor	0.1915	0.400212
ENSMUSG00000030956	Fam53b	family with sequence similarity 53, member B	0.1736	0.400212
ENSMUSG00000024646	Cyb5a	cytochrome b5 type A (microsomal)	-0.2659	0.400975
ENSMUSG00000015806	Qdpr	quinoid dihydropteridine reductase	-0.3056	0.401784
ENSMUSG00000006641	Slc5a6	solute carrier family 5 (sodium-dependent vitamin ...	0.2739	0.402112
ENSMUSG00000037949	Ano10	anoctamin 10	0.2383	0.402331
ENSMUSG00000028173	Wls	wntless WNT ligand secretion mediator	0.1459	0.40326
ENSMUSG00000020623	Map2k6	mitogen-activated protein kinase kinase 6	-0.6654	0.403267
ENSMUSG00000024589	Nedd4l	neural precursor cell expressed, developmentally d...	0.5358	0.403424
ENSMUSG00000050010	Shisa3	shisa family member 3	0.383	0.403424
ENSMUSG00000079165	Sap25	sin3 associated polypeptide	-0.2919	0.403424
ENSMUSG00000021003	Galc	galactosylceramidase	0.3311	0.404243
ENSMUSG00000038965	Ube2l3	ubiquitin-conjugating enzyme E2L 3	-0.2353	0.404436
ENSMUSG00000027333	Smox	spermine oxidase	-0.1764	0.404741
ENSMUSG00000030662	Ipo5	importin 5	0.2225	0.404932
ENSMUSG00000027207	Galk2	galactokinase 2	-0.368	0.404934
ENSMUSG00000026842	Abl1	c-abl oncogene 1, non-receptor tyrosine kinase	-0.2334	0.404934
ENSMUSG00000005510	Ndufs3	NADH:ubiquinone oxidoreductase core subunit S3	-0.2988	0.406044
ENSMUSG00000044768	Macir	macrophage immunometabolism regulator	0.216	0.406404
ENSMUSG00000057236	Rbbp4	retinoblastoma binding protein 4, chromatin remode...	-0.1943	0.406404
ENSMUSG00000018012	Rac3	Rac family small GTPase 3	0.6704	0.407018
ENSMUSG00000031618	Nr3c2	nuclear receptor subfamily 3, group C, member 2	-0.6555	0.407018
ENSMUSG00000093803	Ppp2r3d	protein phosphatase 2 (formerly 2A), regulatory su...	0.3916	0.407018
ENSMUSG00000029504	Ddx51	DEAD box helicase 51	0.3791	0.40737
ENSMUSG00000027455	Nsfl1c	NSFL1 (p97) cofactor (p47)	-0.2447	0.408739
ENSMUSG00000037253	Mex3c	mex3 RNA binding family member C	0.5353	0.40975
ENSMUSG00000024622	Hmgxb3	HMG box domain containing 3	0.2104	0.409873
ENSMUSG00000026712	Mrc1	mannose receptor, C type 1	0.3766	0.411176
ENSMUSG00000020705	Ddx42	DEAD box helicase 42	0.1631	0.411176
ENSMUSG00000021684	Pde8b	phosphodiesterase 8B	-0.5089	0.4113
ENSMUSG00000022711	Pmm2	phosphomannomutase 2	-0.2662	0.4113
ENSMUSG00000015714	Cers2	ceramide synthase 2	0.07323	0.411557
ENSMUSG00000040565	Btaf1	B-TFIID TATA-box binding protein associated factor...	0.3316	0.411993
ENSMUSG00000056671	Prelid2	PRELI domain containing 2	-0.7629	0.412042
ENSMUSG00000041775	Mapk1ip1	mitogen-activated protein kinase 1 interacting pro...	-0.4373	0.413545
ENSMUSG00000022848	Slc49a4	solute carrier family 49 member 4	0.8081	0.413571
ENSMUSG00000053012	Krcc1	lysine-rich coiled-coil 1	-0.284	0.414867
ENSMUSG00000020273	Papolg	poly(A) polymerase gamma	0.3498	0.415728
ENSMUSG00000072966	Gprasp2	G protein-coupled receptor associated sorting prot...	0.4929	0.415874
ENSMUSG00000038346	Zfp384	zinc finger protein 384	0.2149	0.415962
ENSMUSG00000005803	Sqor	sulfide quinone oxidoreductase	-0.2695	0.415994
ENSMUSG00000061244	Exoc5	exocyst complex component 5	0.3185	0.417269
ENSMUSG00000029782	Tmem209	transmembrane protein 209	0.2102	0.417368
ENSMUSG00000024383	Map3k2	mitogen-activated protein kinase kinase kinase 2	0.4182	0.417391
ENSMUSG00000056069	Otulinl	OTU deubiquitinase with linear linkage specificity...	0.3491	0.417391
ENSMUSG00000036986	Pml	promyelocytic leukemia	-0.3897	0.417521
ENSMUSG00000029169	Dhx15	DEAH-box helicase 15	0.1839	0.417623
ENSMUSG00000012017	Scarf2	scavenger receptor class F, member 2	0.8651	0.417713
ENSMUSG00000101645	Gm28635	predicted gene 28635	0.1996	0.41898
ENSMUSG00000036928	Stag3	STAG3 cohesin complex component	0.5516	0.42
ENSMUSG00000031916	Cog8	component of oligomeric golgi complex 8	0.3776	0.42
ENSMUSG00000036352	Ubac1	ubiquitin associated domain containing 1	0.3664	0.42
ENSMUSG00000025104	Hdgfl3	HDGF like 3	0.3212	0.42
ENSMUSG00000024082	Ndufaf7	NADH:ubiquinone oxidoreductase complex assembly fa...	-0.3063	0.42
ENSMUSG00000023861	Mpc1	mitochondrial pyruvate carrier 1	-0.2908	0.42
ENSMUSG00000090175	Ugt1a9	UDP glucuronosyltransferase 1 family, polypeptide ...	0.2177	0.42
ENSMUSG00000089675	Ugt1a8	UDP glucuronosyltransferase 1 family, polypeptide ...	0.2177	0.42
ENSMUSG00000002458	Rgs19	regulator of G-protein signaling 19	-0.1855	0.42
ENSMUSG00000029404	Arl6ip4	ADP-ribosylation factor-like 6 interacting protein...	-0.3617	0.420168
ENSMUSG00000033446	Lpar6	lysophosphatidic acid receptor 6	-0.2067	0.420374
ENSMUSG00000075272	Ift70a2	intraflagellar transport 70A2	-0.8845	0.42099
ENSMUSG00000034853	Acot11	acyl-CoA thioesterase 11	0.7269	0.42208
ENSMUSG00000019907	Ppp1r12a	protein phosphatase 1, regulatory subunit 12A	-0.467	0.42208
ENSMUSG00000023009	Nckap5l	NCK-associated protein 5-like	-0.3413	0.42208
ENSMUSG00000028454	Pigo	phosphatidylinositol glycan anchor biosynthesis, c...	0.3243	0.42208
ENSMUSG00000026170	Cyp27a1	cytochrome P450, family 27, subfamily a, polypepti...	-0.2831	0.42208
ENSMUSG00000027881	Prpf38b	PRP38 pre-mRNA processing factor 38 (yeast) domain...	0.2309	0.42208
ENSMUSG00000090165	Ugt1a10	UDP glycosyltransferase 1 family, polypeptide A10	0.2176	0.42208
ENSMUSG00000089943	Ugt1a5	UDP glucuronosyltransferase 1 family, polypeptide ...	0.2176	0.42208
ENSMUSG00000089960	Ugt1a1	UDP glucuronosyltransferase 1 family, polypeptide ...	0.2149	0.42208
ENSMUSG00000026519	Tmem63a	transmembrane protein 63a	0.0863	0.42208
ENSMUSG00000036743	Psma8	proteasome subunit alpha 8	0.694	0.423002
ENSMUSG00000018398	Septin8	septin 8	0.4253	0.423002
ENSMUSG00000034850	Tmem127	transmembrane protein 127	0.2725	0.423152
ENSMUSG00000024565	Sall3	spalt like transcription factor 3	-0.3389	0.423863
ENSMUSG00000038793	Lefty1	left right determination factor 1	-0.5455	0.424231
ENSMUSG00000026922	Agpat2	1-acylglycerol-3-phosphate O-acyltransferase 2	0.4374	0.424231
ENSMUSG00000090145	Ugt1a6b	UDP glucuronosyltransferase 1 family, polypeptide ...	0.2165	0.42451
ENSMUSG00000048779	P2ry6	pyrimidinergic receptor P2Y, G-protein coupled, 6	-0.164	0.425617
ENSMUSG00000031782	Coq9	coenzyme Q9	-0.3041	0.425648
ENSMUSG00000073125	Xlr3b	X-linked lymphocyte-regulated 3B	-0.9888	0.425692
ENSMUSG00000028603	Scp2	sterol carrier protein 2, liver	-0.2642	0.425816
ENSMUSG00000073599	Ecscr	endothelial cell surface expressed chemotaxis and ...	-0.2565	0.425914
ENSMUSG00000028085	Gatb	glutamyl-tRNA amidotransferase subunit B	-0.377	0.426202
ENSMUSG00000032333	Stoml1	stomatin-like 1	-0.3386	0.426202
ENSMUSG00000024959	Bad	BCL2-associated agonist of cell death	-0.3374	0.426202
ENSMUSG00000003581	Rnf215	ring finger protein 215	0.3019	0.426202
ENSMUSG00000041685	Fcho2	FCH domain only 2	0.1964	0.426202
ENSMUSG00000031021	Tmem9b	TMEM9 domain family, member B	0.1581	0.426202
ENSMUSG00000030095	Tmem43	transmembrane protein 43	0.1265	0.426202
ENSMUSG00000003814	Calr	calreticulin	0.08904	0.426202
[truncated: 15,092 more rows]

## Sheet: MG_PS19-EV vs Saline
Sorted microglia RNA-seq - PS19-EV vs saline injection
feature	symbol	gene_title	logFC	meta.q
ENSMUSG00000026390	Marco	macrophage receptor with collagenous structure	4.496	0.0004392
ENSMUSG00000035042	Ccl5	C-C motif chemokine ligand 5	4.125	0.0013659
ENSMUSG00000040026	Saa3	serum amyloid A 3	4.025	0.0067489
ENSMUSG00000023078	Cxcl13	C-X-C motif chemokine ligand 13	3.208	0.0234795
ENSMUSG00000032484	Ngp	neutrophilic granule protein	-2.919	0.0190305
ENSMUSG00000022126	Acod1	aconitate decarboxylase 1	2.857	0.0015587
ENSMUSG00000032496	Ltf	lactotransferrin	-2.214	0.0581011
ENSMUSG00000021322	Aoah	acyloxyacyl hydrolase	2.105	0.0004407
ENSMUSG00000004296	Il12b	interleukin 12b	2.105	0.013134
ENSMUSG00000020889	Nr1d1	nuclear receptor subfamily 1, group D, member 1	-1.995	0.0100498
ENSMUSG00000022899	Slc15a2	solute carrier family 15 (H+/peptide transporter),...	-1.883	0.0050443
ENSMUSG00000000204	Slfn4	schlafen 4	1.879	0.0442388
ENSMUSG00000027322	Siglec1	sialic acid binding Ig-like lectin 1, sialoadhesin	1.767	0.0835242
ENSMUSG00000041827	Oasl1	2'-5' oligoadenylate synthetase-like 1	1.724	0.0004392
ENSMUSG00000078763	Slfn1	schlafen 1	1.592	0.0290087
ENSMUSG00000021775	Nr1d2	nuclear receptor subfamily 1, group D, member 2	-1.575	0.01576
ENSMUSG00000090272	Mndal	myeloid nuclear differentiation antigen like	1.567	0.0277751
ENSMUSG00000038357	Camp	cathelicidin antimicrobial peptide	-1.558	0.0641903
ENSMUSG00000079017	Ifi27l2a	interferon, alpha-inducible protein 27 like 2A	1.546	0.0099274
ENSMUSG00000020108	Ddit4	DNA-damage-inducible transcript 4	-1.532	0.14241
ENSMUSG00000025498	Irf7	interferon regulatory factor 7	1.478	0.0049256
ENSMUSG00000031779	Ccl22	C-C motif chemokine ligand 22	1.458	0.106595
ENSMUSG00000025492	Ifitm3	interferon induced transmembrane protein 3	1.456	0.002539
ENSMUSG00000029561	Oasl2	2'-5' oligoadenylate synthetase-like 2	1.43	0.0134251
ENSMUSG00000024164	C3	complement component 3	1.417	0.0983651
ENSMUSG00000061808	Ttr	transthyretin	1.397	0.0983651
ENSMUSG00000026536	Ifi211	interferon activated gene 211	1.389	0.0197705
ENSMUSG00000024675	Ms4a4c	membrane-spanning 4-domains, subfamily A, member 4...	1.376	0.0258186
ENSMUSG00000038179	Slamf7	SLAM family member 7	1.371	0.0025394
ENSMUSG00000044703	Phf11a	PHD finger protein 11A	1.368	0.0225867
ENSMUSG00000038156	Spon1	spondin 1, (f-spondin) extracellular matrix protei...	1.354	0.0697621
ENSMUSG00000032690	Oas2	2'-5' oligoadenylate synthetase 2	1.354	0.0561912
ENSMUSG00000022586	Ly6i	lymphocyte antigen 6 family member I	1.347	0.103547
ENSMUSG00000035692	Isg15	ISG15 ubiquitin-like modifier	1.345	0.0012817
ENSMUSG00000027514	Zbp1	Z-DNA binding protein 1	1.334	0.0042589
ENSMUSG00000050370	Ch25h	cholesterol 25-hydroxylase	1.321	0.020815
ENSMUSG00000037849	Ifi206	interferon activated gene 206	1.306	0.014653
ENSMUSG00000001348	Acp5	acid phosphatase 5, tartrate resistant	1.292	0.0580118
ENSMUSG00000073125	Xlr3b	X-linked lymphocyte-regulated 3B	1.282	0.152713
ENSMUSG00000021198	Unc79	unc-79 homolog	-1.268	0.310085
ENSMUSG00000020592	Sdc1	syndecan 1	-1.259	0.085764
ENSMUSG00000029321	Slc10a6	solute carrier family 10 (sodium/bile acid cotrans...	-1.258	0.41358
ENSMUSG00000042349	Ikbke	inhibitor of kappaB kinase epsilon	1.252	0.0285126
ENSMUSG00000022504	Ciita	class II transactivator	1.23	0.0998031
ENSMUSG00000002992	Apoc2	apolipoprotein C2	1.2	0.0433165
ENSMUSG00000045551	Fpr1	formyl peptide receptor 1	1.179	0.135114
ENSMUSG00000024672	Ms4a7	membrane-spanning 4-domains, subfamily A, member 7	1.172	0.0197052
ENSMUSG00000034459	Ifit1	interferon-induced protein with tetratricopeptide ...	1.172	0.0036856
ENSMUSG00000056054	S100a8	S100 calcium binding protein A8 (calgranulin A)	-1.17	0.294216
ENSMUSG00000028527	Ak4	adenylate kinase 4	1.168	0.226544
ENSMUSG00000014773	Dll1	delta like canonical Notch ligand 1	-1.152	0.119297
ENSMUSG00000039765	Cc2d2a	coiled-coil and C2 domain containing 2A	-1.148	0.123599
ENSMUSG00000028756	Pink1	PTEN induced putative kinase 1	-1.137	0.0619358
ENSMUSG00000029322	Plac8	placenta-specific 8	1.112	0.367142
ENSMUSG00000026315	Serpinb8	serine (or cysteine) peptidase inhibitor, clade B,...	1.108	0.282744
ENSMUSG00000022584	Ly6c2	lymphocyte antigen 6 family memberC2	1.101	0.575288
ENSMUSG00000015340	Cybb	cytochrome b-245, beta polypeptide	1.095	0.0012831
ENSMUSG00000054203	Ifi205	interferon activated gene 205	1.088	0.276891
ENSMUSG00000052776	Oas1a	2'-5' oligoadenylate synthetase 1A	1.088	0.0062972
ENSMUSG00000020641	Rsad2	radical S-adenosyl methionine domain containing 2	1.084	0.0119844
ENSMUSG00000030107	Usp18	ubiquitin specific peptidase 18	1.072	0.0188973
ENSMUSG00000066861	Oas1g	2'-5' oligoadenylate synthetase 1G	1.067	0.160744
ENSMUSG00000033355	Rtp4	receptor transporter protein 4	1.061	0.0093273
ENSMUSG00000061577	Adgrg5	adhesion G protein-coupled receptor G5	1.06	0.175257
ENSMUSG00000026875	Traf1	TNF receptor-associated factor 1	1.056	0.0964051
ENSMUSG00000034855	Cxcl10	C-X-C motif chemokine ligand 10	1.056	0.0871921
ENSMUSG00000092511	Gm20547	predicted gene 20547	1.055	0.260007
ENSMUSG00000090231	Cfb	complement factor B	1.054	0.292413
ENSMUSG00000002012	Pnck	pregnancy upregulated non-ubiquitously expressed C...	-1.052	0.137519
ENSMUSG00000024772	Ehd1	EH-domain containing 1	1.052	0.001647
ENSMUSG00000020125	Elane	elastase, neutrophil expressed	-1.046	0.918262
ENSMUSG00000047592	Nxpe5	neurexophilin and PC-esterase domain family, membe...	1.039	0.318738
ENSMUSG00000017652	Cd40	CD40 antigen	1.036	0.1483
ENSMUSG00000022385	Gtse1	G two S phase expressed protein 1	1.035	0.353491
ENSMUSG00000069515	Lyz1	lysozyme 1	1.028	0.437276
ENSMUSG00000059336	Slc14a1	solute carrier family 14 (urea transporter), membe...	-1.023	0.44849
ENSMUSG00000032327	Stra6	stimulated by retinoic acid gene 6	1.021	0.142585
ENSMUSG00000029030	Tprg1l	transformation related protein 63 regulated 1 like	-1.02	0.14114
ENSMUSG00000056498	Tmem154	transmembrane protein 154	-1.017	0.0219755
ENSMUSG00000057667	Bloc1s3	biogenesis of lysosomal organelles complex-1, subu...	-1.01	0.215291
ENSMUSG00000022425	Enpp2	ectonucleotide pyrophosphatase/phosphodiesterase 2	1.01	0.314264
ENSMUSG00000035504	Reep6	receptor accessory protein 6	1.007	0.441352
ENSMUSG00000056071	S100a9	S100 calcium binding protein A9 (calgranulin B)	-0.9974	0.493164
ENSMUSG00000020638	Cmpk2	cytidine/uridine monophosphate kinase 2	0.9973	0.0502693
ENSMUSG00000024222	Fkbp5	FK506 binding protein 5	-0.993	0.100772
ENSMUSG00000040811	Eml2	echinoderm microtubule associated protein like 2	-0.9911	0.34191
ENSMUSG00000030235	Slco1c1	solute carrier organic anion transporter family, m...	0.9911	0.327063
ENSMUSG00000038658	Ric1	RAB6A GEF complex partner 1	-0.9893	0.222436
ENSMUSG00000036615	Rfxap	regulatory factor X-associated protein	-0.9861	0.315387
ENSMUSG00000047735	Samd9l	sterile alpha motif domain containing 9-like	0.9802	0.020815
ENSMUSG00000039997	Ifi203	interferon activated gene 203	0.9788	0.292406
ENSMUSG00000078920	Ifi47	interferon gamma inducible protein 47	0.9774	0.127539
ENSMUSG00000028560	Usp1	ubiquitin specific peptidase 1	-0.9738	0.0198395
ENSMUSG00000071076	Jund	jun D proto-oncogene	-0.9716	0.169737
ENSMUSG00000080058	Gm11175	predicted gene 11175	-0.9652	0.240892
ENSMUSG00000066687	Zbtb16	zinc finger and BTB domain containing 16	-0.9649	0.0853634
ENSMUSG00000030787	Lyve1	lymphatic vessel endothelial hyaluronan receptor 1	0.9642	0.351639
ENSMUSG00000002108	Nr1h3	nuclear receptor subfamily 1, group H, member 3	0.9628	0.103547
ENSMUSG00000021054	Sgpp1	sphingosine-1-phosphate phosphatase 1	-0.9621	0.0469905
ENSMUSG00000049103	Ccr2	C-C motif chemokine receptor 2	0.9596	0.158125
ENSMUSG00000050737	Ptges	prostaglandin E synthase	0.9568	0.318738
ENSMUSG00000030790	Adm	adrenomedullin	0.9535	0.78974
ENSMUSG00000052212	Cd177	CD177 antigen	-0.9504	0.278113
ENSMUSG00000022265	Ank	progressive ankylosis	-0.948	0.043764
ENSMUSG00000002504	Nherf2	NHERF family PDZ scaffold protein 2	-0.9441	0.285198
ENSMUSG00000066894	Vsig10	V-set and immunoglobulin domain containing 10	-0.9419	0.373445
ENSMUSG00000025049	Taf5	TATA-box binding protein associated factor 5	-0.9397	0.161276
ENSMUSG00000076431	Sox4	SRY (sex determining region Y)-box 4	-0.9375	0.191688
ENSMUSG00000027303	Ptpra	protein tyrosine phosphatase receptor type A	-0.9333	0.0701972
ENSMUSG00000044317	Gpr4	G protein-coupled receptor 4	0.9324	0.442171
ENSMUSG00000046985	Tapt1	transmembrane anterior posterior transformation 1	-0.9241	0.0189263
ENSMUSG00000078921	Tgtp2	T cell specific GTPase 2	0.92	0.181217
ENSMUSG00000017466	Timp2	tissue inhibitor of metalloproteinase 2	-0.9196	0.113128
ENSMUSG00000046295	Ankle1	ankyrin repeat and LEM domain containing 1	-0.9183	0.613699
ENSMUSG00000051969	Tlr11	toll-like receptor 11	-0.9182	0.136726
ENSMUSG00000074213	Gm10642	predicted gene 10642	-0.9162	0.175257
ENSMUSG00000028982	Slc25a33	solute carrier family 25, member 33	-0.915	0.193621
ENSMUSG00000055866	Per2	period circadian clock 2	0.9131	0.403994
ENSMUSG00000035373	Ccl7	C-C motif chemokine ligand 7	0.9119	0.0181935
ENSMUSG00000074896	Ifit3	interferon-induced protein with tetratricopeptide ...	0.9117	0.105772
ENSMUSG00000018341	Il12rb2	interleukin 12 receptor, beta 2	-0.9111	0.43656
ENSMUSG00000027999	Pla2g12a	phospholipase A2, group XIIA	-0.9092	0.247179
ENSMUSG00000020978	Klhdc2	kelch domain containing 2	-0.9091	0.0251868
ENSMUSG00000073491	Ifi213	interferon activated gene 213	0.908	0.227104
ENSMUSG00000022792	Yars2	tyrosyl-tRNA synthetase 2 (mitochondrial)	-0.9061	0.0553298
ENSMUSG00000029417	Cxcl9	C-X-C motif chemokine ligand 9	0.9037	0.235216
ENSMUSG00000038065	Mturn	maturin, neural progenitor differentiation regulat...	-0.9023	0.396607
ENSMUSG00000031431	Tsc22d3	TSC22 domain family, member 3	-0.899	0.0452684
ENSMUSG00000025150	Cbr2	carbonyl reductase 2	0.8946	0.130491
ENSMUSG00000020473	Aebp1	AE binding protein 1	0.8935	0.138076
ENSMUSG00000008429	Herpud2	HERPUD family member 2	-0.8928	0.102851
ENSMUSG00000028270	Gbp2	guanylate binding protein 2	0.8924	0.0161752
ENSMUSG00000029234	Tmem165	transmembrane protein 165	-0.8917	0.132645
ENSMUSG00000045838	Ccdc9b	coiled-coil domain containing 9B	-0.8888	0.53584
ENSMUSG00000053931	Cnn3	calponin 3, acidic	0.8855	0.497134
ENSMUSG00000072620	Slfn2	schlafen 2	0.8855	0.0015966
ENSMUSG00000002393	Nr2f6	nuclear receptor subfamily 2, group F, member 6	-0.884	0.192528
ENSMUSG00000039013	Siglecf	sialic acid binding Ig-like lectin F	-0.8836	0.0793335
ENSMUSG00000035172	Plekhh3	pleckstrin homology domain containing, family H (w...	-0.8829	0.27356
ENSMUSG00000069045	Ddx3y	DEAD box helicase 3, Y-linked	0.8807	0.749305
ENSMUSG00000020310	Madcam1	mucosal vascular addressin cell adhesion molecule ...	0.8761	0.504178
ENSMUSG00000022848	Slc49a4	solute carrier family 49 member 4	-0.8729	0.28556
ENSMUSG00000040331	Nsmce4a	NSE4 homolog A, SMC5-SMC6 complex component	-0.8729	0.136327
ENSMUSG00000034707	Gns	glucosamine (N-acetyl)-6-sulfatase	-0.871	0.0247758
ENSMUSG00000076441	Ass1	argininosuccinate synthetase 1	0.8704	0.510755
ENSMUSG00000095028	Sirpb1b	signal-regulatory protein beta 1B	0.8702	0.520064
ENSMUSG00000026669	Mcm10	minichromosome maintenance 10 replication initiati...	-0.8696	0.410798
ENSMUSG00000022037	Clu	clusterin	0.8693	0.414832
ENSMUSG00000066684	Pilrb1	paired immunoglobin-like type 2 receptor beta 1	0.8687	0.0878297
ENSMUSG00000036955	Kifbp	kinesin family binding protein	-0.8679	0.210972
ENSMUSG00000024610	Cd74	CD74 antigen (invariant polypeptide of major histo...	0.8678	0.118173
ENSMUSG00000061718	Ppp1r1b	protein phosphatase 1, regulatory inhibitor subuni...	0.8647	0.406553
ENSMUSG00000069206	Zfp874a	zinc finger protein 874a	-0.8646	0.0843646
ENSMUSG00000030282	Cmas	cytidine monophospho-N-acetylneuraminic acid synth...	-0.8642	0.0988431
ENSMUSG00000027239	Mdk	midkine	0.8635	0.39877
ENSMUSG00000069273	H3c6	H3 clustered histone 6	-0.861	0.151782
ENSMUSG00000029416	Slc15a4	solute carrier family 15, member 4	-0.8569	0.0480485
ENSMUSG00000021171	Esyt2	extended synaptotagmin-like protein 2	-0.8564	0.050141
ENSMUSG00000020010	Vnn3	vanin 3	0.8527	0.227104
ENSMUSG00000062488	Ifit3b	interferon-induced protein with tetratricopeptide ...	0.8519	0.112489
ENSMUSG00000036949	Slc39a12	solute carrier family 39 (zinc transporter), membe...	-0.8503	0.0921268
ENSMUSG00000068220	Lgals1	lectin, galactose binding, soluble 1	0.8501	0.0795105
ENSMUSG00000031523	Dlc1	deleted in liver cancer 1	-0.8482	0.288804
ENSMUSG00000028931	Kcnab2	potassium voltage-gated channel, shaker-related su...	0.8466	0.389419
ENSMUSG00000050270	Tmem220	transmembrane protein 220	-0.8457	0.488657
ENSMUSG00000069049	Eif2s3y	eukaryotic translation initiation factor 2, subuni...	0.8449	0.786991
ENSMUSG00000040809	Chil3	chitinase-like 3	-0.8448	0.542223
ENSMUSG00000051497	Kcnj16	potassium inwardly-rectifying channel, subfamily J...	-0.8392	0.485347
ENSMUSG00000014852	Adamts13	ADAM metallopeptidase with thrombospondin type 1 m...	-0.8371	0.531101
ENSMUSG00000037643	Prkci	protein kinase C, iota	-0.8362	0.0886435
ENSMUSG00000039357	Fut11	fucosyltransferase 11	-0.8349	0.477874
ENSMUSG00000034614	Pik3ip1	phosphoinositide-3-kinase interacting protein 1	-0.8333	0.27467
ENSMUSG00000003882	Il7r	interleukin 7 receptor	-0.8324	0.106744
ENSMUSG00000074677	Sirpb1c	signal-regulatory protein beta 1C	0.8272	0.369182
ENSMUSG00000027670	Ocstamp	osteoclast stimulatory transmembrane protein	-0.8249	0.245589
ENSMUSG00000021681	Aggf1	angiogenic factor with G patch and FHA domains 1	-0.8247	0.067229
ENSMUSG00000060227	Golm2	golgi membrane protein 2	-0.8243	0.404743
ENSMUSG00000027075	Slc43a1	solute carrier family 43, member 1	-0.8238	0.606928
ENSMUSG00000002228	Ppm1j	protein phosphatase 1J	-0.8233	0.574722
ENSMUSG00000050930	Map10	microtubule-associated protein 10	-0.8205	0.441352
ENSMUSG00000040016	Ptger3	prostaglandin E receptor 3 (subtype EP3)	-0.8201	0.406907
ENSMUSG00000000365	Rnf17	ring finger protein 17	-0.8179	0.473387
ENSMUSG00000047246	H2bc6	H2B clustered histone 6	-0.8177	0.0787687
ENSMUSG00000056708	Ier5	immediate early response 5	-0.8175	0.106733
ENSMUSG00000058385	H2bc8	H2B clustered histone 8	-0.8172	0.0142887
ENSMUSG00000024190	Dusp1	dual specificity phosphatase 1	-0.816	0.409892
ENSMUSG00000016283	H2-M2	histocompatibility 2, M region locus 2	0.815	0.444657
ENSMUSG00000019189	Rnf145	ring finger protein 145	-0.8137	0.068727
ENSMUSG00000026080	Chst10	carbohydrate sulfotransferase 10	-0.8126	0.290764
ENSMUSG00000054716	Zfp771	zinc finger protein 771	-0.8091	0.410798
ENSMUSG00000024978	Gpam	glycerol-3-phosphate acyltransferase, mitochondria...	-0.809	0.0787687
ENSMUSG00000026981	Il1rn	interleukin 1 receptor antagonist	0.8068	0.212495
ENSMUSG00000060586	H2-Eb1	histocompatibility 2, class II antigen E beta	0.8046	0.245209
ENSMUSG00000013523	Bcas1	brain enriched myelin associated protein 1	0.8042	0.344912
ENSMUSG00000073490	Ifi207	interferon activated gene 207	0.8032	0.0092203
ENSMUSG00000029229	Chic2	cysteine-rich hydrophobic domain 2	-0.8021	0.067244
ENSMUSG00000022519	Srl	sarcalumenin	-0.802	0.134304
ENSMUSG00000040234	Tm7sf3	transmembrane 7 superfamily member 3	-0.8019	0.0131811
ENSMUSG00000066677	Ifi208	interferon activated gene 208	0.799	0.699793
ENSMUSG00000039109	F13a1	coagulation factor XIII, A1 subunit	0.7982	0.144037
ENSMUSG00000008845	Cd163	CD163 antigen	0.7979	0.198446
ENSMUSG00000045328	Cenpe	centromere protein E	0.7964	0.553405
ENSMUSG00000060708	Bloc1s4	biogenesis of lysosomal organelles complex-1, subu...	-0.796	0.376803
ENSMUSG00000053063	Clec12a	C-type lectin domain family 12, member a	0.7919	0.240781
ENSMUSG00000001157	Gmcl1	germ cell-less, spermatogenesis associated 1	-0.7885	0.24782
ENSMUSG00000021339	Mrs2	MRS2 magnesium transporter	-0.7875	0.489786
ENSMUSG00000046006	Gapt	Grb2-binding adaptor, transmembrane	0.7859	0.502805
ENSMUSG00000073910	Mob3b	MOB kinase activator 3B	0.7852	0.631747
ENSMUSG00000040152	Thbs1	thrombospondin 1	-0.7851	0.309252
ENSMUSG00000091811	Inafm1	InaF motif containing 1	-0.7841	0.352916
ENSMUSG00000034761	Map4k5	mitogen-activated protein kinase kinase kinase kin...	-0.7817	0.0469905
ENSMUSG00000079414	Gm11110	predicted gene 11110	0.7803	0.727287
ENSMUSG00000040105	Plpp6	phospholipid phosphatase 6	-0.7789	0.34055
ENSMUSG00000060678	H4c3	H4 clustered histone 3	-0.776	0.227615
ENSMUSG00000046591	Ticrr	TOPBP1-interacting checkpoint and replication regu...	0.7758	0.644062
ENSMUSG00000061482	H4c4	H4 clustered histone 4	-0.7755	0.52077
ENSMUSG00000040659	Efhd2	EF hand domain containing 2	-0.7722	0.0872303
ENSMUSG00000097100	9230104M06Rik	RIKEN cDNA 9230104M06 gene	-0.7716	0.312942
ENSMUSG00000031447	Lamp1	lysosomal-associated membrane protein 1	-0.7687	0.170958
ENSMUSG00000049939	Lrrc4	leucine rich repeat containing 4	0.7677	0.664295
ENSMUSG00000036594	H2-Aa	histocompatibility 2, class II antigen A, alpha	0.7676	0.343536
ENSMUSG00000049037	Clec4a1	C-type lectin domain family 4, member a1	0.7664	0.282384
ENSMUSG00000037944	Ccr7	C-C motif chemokine receptor 7	0.7664	0.428656
ENSMUSG00000009185	Ccl8	C-C motif chemokine ligand 8	0.765	0.507623
ENSMUSG00000016552	Foxred2	FAD-dependent oxidoreductase domain containing 2	0.7634	0.730826
ENSMUSG00000012017	Scarf2	scavenger receptor class F, member 2	-0.7628	0.548459
ENSMUSG00000048429	Timm29	translocase of inner mitochondrial membrane 29	-0.7627	0.154188
ENSMUSG00000046245	Pilra	paired immunoglobin-like type 2 receptor alpha	0.7613	0.0015966
ENSMUSG00000035529	Prdm4	PR domain containing 4	-0.7607	0.0484389
ENSMUSG00000030309	Caprin2	caprin family member 2	-0.7606	0.542223
ENSMUSG00000025016	Tm9sf3	transmembrane 9 superfamily member 3	-0.7601	0.040188
ENSMUSG00000043445	Pgp	phosphoglycolate phosphatase	-0.7597	0.403526
ENSMUSG00000024661	Fth1	ferritin heavy polypeptide 1	0.7565	0.0012391
ENSMUSG00000028037	Ifi44	interferon-induced protein 44	0.7555	0.331904
ENSMUSG00000042050	Dync2i1	dynein 2 intermediate chain 1	0.7553	0.205769
ENSMUSG00000036278	Macrod1	mono-ADP ribosylhydrolase 1	-0.7547	0.573321
ENSMUSG00000063656	Gm10135	predicted gene 10135	-0.7539	0.387059
ENSMUSG00000047539	Fbxo28	F-box protein 28	-0.7539	0.0769873
ENSMUSG00000030268	Bcat1	branched chain aminotransferase 1, cytosolic	-0.7532	0.447535
ENSMUSG00000031304	Il2rg	interleukin 2 receptor, gamma chain	0.7528	0.0012831
ENSMUSG00000029304	Spp1	secreted phosphoprotein 1	-0.7527	0.567003
ENSMUSG00000048170	Mcmbp	minichromosome maintenance complex binding protein	-0.7519	0.105772
ENSMUSG00000024066	Xdh	xanthine dehydrogenase	0.7519	0.0054229
ENSMUSG00000036087	Slain2	SLAIN motif family, member 2	-0.7514	0.0132557
ENSMUSG00000037443	Cep85	centrosomal protein 85	-0.7513	0.0082303
ENSMUSG00000026222	Sp100	nuclear antigen Sp100	0.7508	0.0110516
ENSMUSG00000041481	Serpina3g	serine (or cysteine) peptidase inhibitor, clade A,...	0.7503	0.555131
ENSMUSG00000035000	Dpp4	dipeptidylpeptidase 4	0.7499	0.553405
ENSMUSG00000100210	H3c7	H3 clustered histone 7	-0.7486	0.813108
ENSMUSG00000079419	Ms4a6c	membrane-spanning 4-domains, subfamily A, member 6...	0.7482	0.0037727
ENSMUSG00000034430	Zxdc	ZXD family zinc finger C	-0.7478	0.274757
ENSMUSG00000040396	Abhd13	abhydrolase domain containing 13	-0.7475	0.0964184
ENSMUSG00000072294	Klf12	Kruppel-like transcription factor 12	-0.7464	0.148963
ENSMUSG00000001542	Ell2	elongation factor for RNA polymerase II 2	0.7451	0.0359008
ENSMUSG00000074228	Gm10645	predicted gene 10645	-0.7438	0.367712
ENSMUSG00000054474	Thnsl2	threonine synthase-like 2 (bacterial)	-0.743	0.312449
ENSMUSG00000021102	Glrx5	glutaredoxin 5	-0.7428	0.383733
ENSMUSG00000001930	Vwf	Von Willebrand factor	-0.742	0.607008
ENSMUSG00000073421	H2-Ab1	histocompatibility 2, class II antigen A, beta 1	0.7415	0.320149
ENSMUSG00000022900	Ildr1	immunoglobulin-like domain containing receptor 1	-0.7395	0.154852
ENSMUSG00000029309	Sparcl1	SPARC-like 1	0.739	0.575288
ENSMUSG00000020482	Ccdc117	coiled-coil domain containing 117	-0.7388	0.206183
ENSMUSG00000027860	Vangl1	VANGL planar cell polarity 1	-0.7386	0.314427
ENSMUSG00000095788	Sirpb1a	signal-regulatory protein beta 1A	0.7386	0.542745
ENSMUSG00000023456	Tpi1	triosephosphate isomerase 1	0.738	0.0036416
ENSMUSG00000025907	Rb1cc1	RB1-inducible coiled-coil 1	-0.7365	0.0107525
ENSMUSG00000048758	Rpl29	ribosomal protein L29	0.7364	0.0002008
ENSMUSG00000022378	Cyrib	CYFIP related Rac1 interactor B	-0.7349	0.134249
ENSMUSG00000096606	Tpbgl	trophoblast glycoprotein-like	-0.7341	0.22665
ENSMUSG00000032531	Amotl2	angiomotin-like 2	0.7337	0.727287
ENSMUSG00000015468	Notch4	notch 4	-0.7328	0.318738
ENSMUSG00000026589	Sec16b	SEC16 homolog B, endoplasmic reticulum export fact...	-0.7326	0.188717
ENSMUSG00000035352	Ccl12	C-C motif chemokine ligand 12	0.7312	0.0036534
ENSMUSG00000001128	Cfp	complement factor properdin	0.731	0.430741
ENSMUSG00000061130	Ppm1b	protein phosphatase 1B, magnesium dependent, beta ...	-0.7306	0.079406
ENSMUSG00000028654	Mycl	v-myc avian myelocytomatosis viral oncogene lung c...	-0.7298	0.166404
ENSMUSG00000047434	Xxylt1	xyloside xylosyltransferase 1	-0.729	0.270974
ENSMUSG00000029534	St7	suppression of tumorigenicity 7	-0.7285	0.348108
ENSMUSG00000021591	Glrx	glutaredoxin	0.7268	0.0024892
ENSMUSG00000023944	Hsp90ab1	heat shock protein 90 alpha (cytosolic), class B m...	0.7258	0.0248246
ENSMUSG00000005312	Ubqln1	ubiquilin 1	-0.7256	0.181046
ENSMUSG00000039529	Atp8b1	ATPase, class I, type 8B, member 1	-0.7251	0.658953
ENSMUSG00000021973	Micu2	mitochondrial calcium uptake 2	-0.7234	0.133473
ENSMUSG00000045362	Tnfrsf26	tumor necrosis factor receptor superfamily, member...	-0.7232	0.727287
ENSMUSG00000046791	Riox1	ribosomal oxygenase 1	-0.7218	0.310216
ENSMUSG00000027555	Car13	carbonic anhydrase 13	0.7217	0.331904
ENSMUSG00000011831	Evi5	ecotropic viral integration site 5	-0.7215	0.0470193
ENSMUSG00000029376	Mthfd2l	methylenetetrahydrofolate dehydrogenase (NADP+ dep...	-0.7205	0.611225
ENSMUSG00000037185	Krt80	keratin 80	0.7203	0.565149
ENSMUSG00000024601	Isoc1	isochorismatase domain containing 1	-0.7203	0.128811
ENSMUSG00000031584	Gsr	glutathione reductase	-0.7195	0.170496
ENSMUSG00000019861	Gopc	golgi associated PDZ and coiled-coil motif contain...	-0.7186	0.105772
ENSMUSG00000020399	Havcr2	hepatitis A virus cellular receptor 2	-0.7184	0.000308
ENSMUSG00000017831	Rab5a	RAB5A, member RAS oncogene family	-0.7178	0.274149
ENSMUSG00000020134	Peli1	pellino 1	-0.7174	0.120337
ENSMUSG00000053687	Dpep2	dipeptidase 2	0.7173	0.242224
ENSMUSG00000017002	Slpi	secretory leukocyte peptidase inhibitor	-0.7173	0.529062
ENSMUSG00000031823	Zdhhc7	zinc finger, DHHC domain containing 7	-0.7172	0.232828
ENSMUSG00000048490	Nrip1	nuclear receptor interacting protein 1	-0.717	0.0017592
ENSMUSG00000046774	8030474K03Rik	RIKEN cDNA 8030474K03 gene	-0.7169	0.850587
ENSMUSG00000038697	Taf5l	TATA-box binding protein associated factor 5 like	-0.7169	0.0194746
ENSMUSG00000050350	Gpr18	G protein-coupled receptor 18	0.7167	0.819419
ENSMUSG00000037568	Vash2	vasohibin 2	-0.7164	0.607008
ENSMUSG00000050103	Agmo	alkylglycerol monooxygenase	-0.7162	0.007213
ENSMUSG00000037553	Zdhhc18	zinc finger, DHHC domain containing 18	0.7148	0.327063
ENSMUSG00000006342	Susd2	sushi domain containing 2	0.7146	0.850026
ENSMUSG00000015090	Ptgds	prostaglandin D2 synthase (brain)	0.7145	0.753405
ENSMUSG00000036840	Siah1a	siah E3 ubiquitin protein ligase 1A	-0.7139	0.330977
ENSMUSG00000096953	Gm26571	predicted gene, 26571	-0.7133	0.430046
ENSMUSG00000035891	Cerk	ceramide kinase	-0.7118	0.0380228
ENSMUSG00000034807	Colgalt1	collagen beta(1-O)galactosyltransferase 1	-0.7111	0.012698
ENSMUSG00000022200	Golph3	golgi phosphoprotein 3	-0.7097	0.0424077
ENSMUSG00000026193	Fn1	fibronectin 1	0.7093	0.267031
ENSMUSG00000070427	Il18bp	interleukin 18 binding protein	0.7086	0.394094
ENSMUSG00000049871	Nlrc3	NLR family, CARD domain containing 3	0.7071	0.727287
ENSMUSG00000020091	Eif4ebp2	eukaryotic translation initiation factor 4E bindin...	-0.7065	0.600676
ENSMUSG00000087006	Gm13889	predicted gene 13889	-0.706	0.612844
ENSMUSG00000060131	Atp8b4	ATPase, class I, type 8B, member 4	0.7038	0.580983
ENSMUSG00000036022	Pabir2	PABIR family member 2	-0.703	0.295175
ENSMUSG00000001131	Timp1	tissue inhibitor of metalloproteinase 1	-0.7026	0.611072
ENSMUSG00000028578	Caap1	caspase activity and apoptosis inhibitor 1	-0.7026	0.542664
ENSMUSG00000029379	Cxcl3	C-X-C motif chemokine ligand 3	-0.7026	0.481795
ENSMUSG00000052656	Rnf103	ring finger protein 103	-0.7018	0.197641
ENSMUSG00000063358	Mapk1	mitogen-activated protein kinase 1	-0.7017	0.0160977
ENSMUSG00000047945	Marcksl1	MARCKS-like 1	0.7016	0.10698
ENSMUSG00000019359	Gdpd2	glycerophosphodiester phosphodiesterase domain con...	0.7003	0.33696
ENSMUSG00000049686	Orai1	ORAI calcium release-activated calcium modulator 1	-0.6991	0.17848
ENSMUSG00000031827	Cotl1	coactosin like F-actin binding protein 1	0.6989	0.0619358
ENSMUSG00000030187	Klra2	killer cell lectin-like receptor, subfamily A, mem...	0.6983	0.725544
ENSMUSG00000023830	Igf2r	insulin-like growth factor 2 receptor	0.6983	0.585068
ENSMUSG00000029178	Klf3	Kruppel-like transcription factor 3 (basic)	-0.6969	0.0987847
ENSMUSG00000028464	Tpm2	tropomyosin 2, beta	0.6968	0.749723
ENSMUSG00000030104	Edem1	ER degradation enhancer, mannosidase alpha-like 1	-0.6963	0.018788
ENSMUSG00000052681	Rap1b	RAS related protein 1b	-0.6938	0.115875
ENSMUSG00000015189	Casd1	CAS1 domain containing 1	-0.6931	0.0206361
ENSMUSG00000018920	Cxcl16	C-X-C motif chemokine ligand 16	0.6922	0.0028752
ENSMUSG00000040483	Xaf1	XIAP associated factor 1	0.691	0.0637126
ENSMUSG00000022102	Dok2	docking protein 2	0.6904	0.103652
ENSMUSG00000097411	B430218F22Rik	RIKEN cDNA B430218F22 gene	-0.6892	0.465886
ENSMUSG00000034789	Rab24	RAB24, member RAS oncogene family	-0.6892	0.419417
ENSMUSG00000035828	Pim3	proviral integration site 3	-0.6885	0.27307
ENSMUSG00000031138	F9	coagulation factor IX	-0.6879	0.223002
ENSMUSG00000043019	Edem3	ER degradation enhancer, mannosidase alpha-like 3	-0.6873	0.0596719
ENSMUSG00000052253	Zfp622	zinc finger protein 622	-0.6868	0.228915
ENSMUSG00000028108	Ecm1	extracellular matrix protein 1	0.6859	0.290764
ENSMUSG00000020282	Rhbdf1	rhomboid 5 homolog 1	-0.6857	0.0503066
ENSMUSG00000030255	Sspn	sarcospan	-0.6852	0.748334
ENSMUSG00000039236	Isg20	interferon-stimulated protein	0.6849	0.189628
ENSMUSG00000021638	Ocln	occludin	-0.6841	0.396501
ENSMUSG00000000386	Mx1	MX dynamin-like GTPase 1	0.6841	0.183118
ENSMUSG00000028284	Map3k7	mitogen-activated protein kinase kinase kinase 7	-0.684	0.0963236
ENSMUSG00000051378	Kif18b	kinesin family member 18B	0.6838	0.76708
ENSMUSG00000041324	Inhba	inhibin beta-A	-0.683	0.49252
ENSMUSG00000039725	Trp53rka	transformation related protein 53 regulating kinas...	-0.6829	0.310227
ENSMUSG00000024084	Qpct	glutaminyl-peptide cyclotransferase (glutaminyl cy...	-0.6816	0.552434
ENSMUSG00000056116	H2-T22	histocompatibility 2, T region locus 22	0.6793	0.016326
ENSMUSG00000028557	Rnf11	ring finger protein 11	-0.679	0.236268
ENSMUSG00000059923	Grb2	growth factor receptor bound protein 2	-0.6781	0.194675
ENSMUSG00000045932	Ifit2	interferon-induced protein with tetratricopeptide ...	0.6778	0.079406
ENSMUSG00000073489	Ifi204	interferon activated gene 204	0.6777	0.0439781
ENSMUSG00000029843	Slc13a4	solute carrier family 13 (sodium/sulfate symporter...	0.6774	0.550437
ENSMUSG00000042364	Snx18	sorting nexin 18	-0.677	0.0849388
ENSMUSG00000052812	Atad2b	ATPase family, AAA domain containing 2B	-0.6765	0.424001
ENSMUSG00000034714	Ttyh2	tweety family member 2	-0.6762	0.289203
ENSMUSG00000032517	Mobp	myelin-associated oligodendrocytic basic protein	0.6761	0.535111
ENSMUSG00000052934	Fbxo31	F-box protein 31	-0.6761	0.173553
ENSMUSG00000091649	Phf11b	PHD finger protein 11B	0.6761	0.0189061
ENSMUSG00000040616	Tmem51	transmembrane protein 51	0.6756	0.663802
ENSMUSG00000016918	Sulf1	sulfatase 1	0.6748	0.612844
ENSMUSG00000068129	Cst7	cystatin F (leukocystatin)	0.6747	0.0377909
ENSMUSG00000020460	Rps27a	ribosomal protein S27A	0.6747	0.0058457
ENSMUSG00000020653	Klf11	Kruppel-like transcription factor 11	-0.6746	0.443112
ENSMUSG00000051037	Zfp455	zinc finger protein 455	-0.6746	0.261946
ENSMUSG00000026739	Bmi1	Bmi1 polycomb ring finger oncogene	-0.6742	0.0503066
ENSMUSG00000029312	Klhl8	kelch-like 8	-0.6737	0.419056
ENSMUSG00000006169	Clint1	clathrin interactor 1	-0.6736	0.133343
ENSMUSG00000026835	Fcnb	ficolin B	-0.6716	0.964329
ENSMUSG00000053094	Tmem248	transmembrane protein 248	-0.6713	0.0411443
ENSMUSG00000051627	H1f4	H1.4 linker histone, cluster member	-0.6693	0.227104
ENSMUSG00000049339	Retreg2	reticulophagy regulator family member 2	-0.669	0.0267067
ENSMUSG00000020857	Nme2	NME/NM23 nucleoside diphosphate kinase 2	0.6683	0.0008359
ENSMUSG00000022175	Lrp10	low-density lipoprotein receptor-related protein 1...	-0.6681	0.169404
ENSMUSG00000020021	Fgd6	FYVE, RhoGEF and PH domain containing 6	-0.6678	0.573487
ENSMUSG00000057897	Camk2b	calcium/calmodulin-dependent protein kinase II, be...	-0.6677	0.586552
ENSMUSG00000046410	Kcnk6	potassium inwardly-rectifying channel, subfamily K...	-0.6672	0.122275
ENSMUSG00000021594	Srd5a1	steroid 5 alpha-reductase 1	-0.6665	0.613371
ENSMUSG00000053411	Cbx7	chromobox 7	-0.6663	0.116549
ENSMUSG00000028980	H6pd	hexose-6-phosphate dehydrogenase (glucose 1-dehydr...	-0.6658	0.0434102
ENSMUSG00000028700	Pomgnt1	protein O-linked mannose beta 1,2-N-acetylglucosam...	-0.6652	0.107135
ENSMUSG00000031065	Cdk16	cyclin dependent kinase 16	-0.665	0.0490289
ENSMUSG00000074622	Mafb	MAF bZIP transcription factor B	-0.6649	0.198466
ENSMUSG00000042594	Sh2b3	SH2B adaptor protein 3	-0.6648	0.134702
ENSMUSG00000041408	Wapl	WAPL cohesin release factor	-0.6647	0.0054313
ENSMUSG00000060181	Slc35e3	solute carrier family 35, member E3	-0.6644	0.16618
ENSMUSG00000040351	Ankib1	ankyrin repeat and IBR domain containing 1	-0.6625	0.291792
ENSMUSG00000042745	Id1	inhibitor of DNA binding 1, HLH protein	0.6619	0.542223
ENSMUSG00000040899	Ccr6	C-C motif chemokine receptor 6	-0.6613	0.718602
ENSMUSG00000031438	Rnf128	ring finger protein 128	-0.6591	0.51126
ENSMUSG00000016496	Cd274	CD274 antigen	0.659	0.0136136
ENSMUSG00000055102	Zfp819	zinc finger protein 819	-0.6587	0.607008
ENSMUSG00000026873	Phf19	PHD finger protein 19	0.6582	0.932956
ENSMUSG00000032068	Plet1	placenta expressed transcript 1	-0.6581	0.766237
ENSMUSG00000026820	Ptges2	prostaglandin E synthase 2	-0.658	0.592747
ENSMUSG00000024091	Vapa	vesicle-associated membrane protein, associated pr...	-0.6562	0.453127
ENSMUSG00000017390	Aldoc	aldolase C, fructose-bisphosphate	0.6555	0.564519
ENSMUSG00000046718	Bst2	bone marrow stromal cell antigen 2	0.6541	0.002329
ENSMUSG00000014496	Ankrd28	ankyrin repeat domain 28	-0.654	0.609949
ENSMUSG00000028793	Rnf19b	ring finger protein 19B	-0.6535	0.0069642
ENSMUSG00000006930	Hap1	huntingtin-associated protein 1	0.6534	0.678043
ENSMUSG00000026478	Lamc1	laminin, gamma 1	-0.6531	0.673664
ENSMUSG00000033307	Mif	macrophage migration inhibitory factor (glycosylat...	0.6523	0.0006019
ENSMUSG00000031749	St3gal2	ST3 beta-galactoside alpha-2,3-sialyltransferase 2	-0.6507	0.0372214
ENSMUSG00000040128	Pnrc1	proline-rich nuclear receptor coactivator 1	-0.6504	0.0562045
ENSMUSG00000039683	Sdk1	sidekick cell adhesion molecule 1	-0.6502	0.262502
ENSMUSG00000059994	Fcrl1	Fc receptor-like 1	-0.6502	0.0067148
ENSMUSG00000009350	Mpo	myeloperoxidase	-0.6502	0.955967
ENSMUSG00000074238	Ap1ar	adaptor-related protein complex 1 associated regul...	-0.6494	0.233231
ENSMUSG00000026104	Stat1	signal transducer and activator of transcription 1	0.6494	0.0085157
ENSMUSG00000068267	Cenpb	centromere protein B	0.649	0.517087
ENSMUSG00000024529	Lox	lysyl oxidase	0.6483	0.902237
ENSMUSG00000097061	9330151L19Rik	RIKEN cDNA 9330151L19 gene	-0.6476	0.568689
ENSMUSG00000075010	AW112010	expressed sequence AW112010	0.647	0.129214
ENSMUSG00000000682	Cd52	CD52 antigen	0.6456	0.0163472
ENSMUSG00000038605	Samd10	sterile alpha motif domain containing 10	-0.6455	0.487167
ENSMUSG00000021959	Lats2	large tumor suppressor 2	-0.6444	0.0143808
ENSMUSG00000021400	Wrnip1	Werner helicase interacting protein 1	-0.644	0.392824
ENSMUSG00000042429	Adora1	adenosine A1 receptor	0.6433	0.610743
ENSMUSG00000003418	St8sia6	ST8 alpha-N-acetyl-neuraminide alpha-2,8-sialyltra...	-0.6432	0.648055
ENSMUSG00000021731	Mrps30	mitochondrial ribosomal protein S30	-0.6425	0.542261
ENSMUSG00000050947	Amigo1	adhesion molecule with Ig like domain 1	-0.6406	0.725544
ENSMUSG00000090213	Peds1	plasmanylethanolamine desaturase 1	-0.6403	0.0840345
ENSMUSG00000048728	Zfp454	zinc finger protein 454	0.6402	0.833213
ENSMUSG00000020358	Hnrnpab	heterogeneous nuclear ribonucleoprotein A/B	-0.6401	0.214442
ENSMUSG00000089901	Gm8113	predicted gene 8113	-0.6397	0.746384
ENSMUSG00000042873	Lhfpl4	lipoma HMGIC fusion partner-like protein 4	-0.6386	0.794596
ENSMUSG00000045065	9930022D16Rik	RIKEN cDNA 9930022D16 gene	0.6379	0.611072
ENSMUSG00000074093	Svip	small VCP/p97-interacting protein	-0.6368	0.629791
ENSMUSG00000031709	Tbc1d9	TBC1 domain family, member 9	-0.6363	0.0878297
ENSMUSG00000028184	Adgrl2	adhesion G protein-coupled receptor L2	-0.6362	0.3674
ENSMUSG00000019254	Ppp1r12c	protein phosphatase 1, regulatory subunit 12C	0.6358	0.0489726
ENSMUSG00000062232	Rapgef2	Rap guanine nucleotide exchange factor (GEF) 2	-0.6349	0.255903
ENSMUSG00000029772	Ahcyl2	S-adenosylhomocysteine hydrolase-like 2	-0.634	0.064223
ENSMUSG00000019838	Slc16a10	solute carrier family 16 (monocarboxylic acid tran...	0.6335	0.553405
ENSMUSG00000075602	Ly6a	lymphocyte antigen 6 family member A	0.6333	0.291792
ENSMUSG00000016763	Scube1	signal peptide, CUB domain, EGF-like 1	-0.6332	0.606928
ENSMUSG00000011179	Odc1	ornithine decarboxylase, structural 1	-0.6327	0.0439781
ENSMUSG00000021636	Marveld2	MARVEL (membrane-associating) domain containing 2	-0.6319	0.382337
ENSMUSG00000021057	Akap5	A kinase anchor protein 5	-0.6309	0.76327
ENSMUSG00000099689	Zfp383	zinc finger protein 383	-0.6306	0.650597
ENSMUSG00000040829	Zmynd15	zinc finger, MYND-type containing 15	0.6303	0.0015966
ENSMUSG00000029208	Guf1	GUF1 homolog, GTPase	-0.6294	0.0302933
ENSMUSG00000006526	Stimate	STIM activating enhancer	-0.6292	0.0874435
ENSMUSG00000037583	Nr0b2	nuclear receptor subfamily 0, group B, member 2	0.6281	0.611072
ENSMUSG00000057666	Gapdh	glyceraldehyde-3-phosphate dehydrogenase	0.6278	0.0009456
ENSMUSG00000019158	Tmem160	transmembrane protein 160	-0.6278	0.724468
ENSMUSG00000031681	Smad1	SMAD family member 1	-0.6274	0.136327
ENSMUSG00000070291	Ddx43	DEAD box helicase 43	-0.6267	0.398657
ENSMUSG00000032294	Pkm	pyruvate kinase, muscle	0.6262	0.0042075
ENSMUSG00000034235	Usp54	ubiquitin specific peptidase 54	-0.6258	0.487167
ENSMUSG00000025588	Nat1	N-acetyl transferase 1	-0.6253	0.730701
ENSMUSG00000020534	Shmt1	serine hydroxymethyltransferase 1 (soluble)	0.6252	0.1601
ENSMUSG00000016984	Etaa1	Ewing tumor-associated antigen 1	-0.6247	0.307426
ENSMUSG00000031934	Panx1	pannexin 1	-0.6246	0.350578
ENSMUSG00000034610	Tut4	terminal uridylyl transferase 4	-0.6244	0.157399
ENSMUSG00000027562	Car2	carbonic anhydrase 2	0.6244	0.631747
ENSMUSG00000066682	Pilrb2	paired immunoglobin-like type 2 receptor beta 2	0.6243	0.58259
ENSMUSG00000027454	Gins1	GINS complex subunit 1	0.6243	0.282109
ENSMUSG00000054072	Iigp1	interferon inducible GTPase 1	0.6242	0.534075
ENSMUSG00000079164	Tlr5	toll-like receptor 5	-0.6238	0.266304
ENSMUSG00000030265	Kras	Kirsten rat sarcoma viral oncogene homolog	-0.6238	0.215291
ENSMUSG00000041538	H2-Ob	histocompatibility 2, O region beta locus	-0.6237	0.0053405
ENSMUSG00000054855	Rnd1	Rho family GTPase 1	0.6237	0.849271
ENSMUSG00000027398	Il1b	interleukin 1 beta	0.6233	0.1017
ENSMUSG00000010461	Eya4	EYA transcriptional coactivator and phosphatase 4	-0.6229	0.228732
ENSMUSG00000032370	Lactb	lactamase, beta	-0.6228	0.349237
ENSMUSG00000060733	Ipmk	inositol polyphosphate multikinase	-0.6225	0.227626
ENSMUSG00000020333	Acsl6	acyl-CoA synthetase long-chain family member 6	0.6223	0.460045
ENSMUSG00000064138	Arb2a	ARB2 cotranscriptional regulator A	-0.6217	0.170987
ENSMUSG00000037373	Ctbp1	C-terminal binding protein 1	-0.6217	0.191688
ENSMUSG00000024726	Carnmt1	carnosine N-methyltransferase 1	-0.6213	0.885846
ENSMUSG00000059363	Fxn	frataxin	0.6211	0.53268
ENSMUSG00000090093	Gm14399	predicted gene 14399	-0.6208	0.746384
ENSMUSG00000030830	Itgal	integrin alpha L	0.6207	0.460896
ENSMUSG00000042529	Kcnj12	potassium inwardly-rectifying channel, subfamily J...	-0.6206	0.719731
ENSMUSG00000078202	Nrarp	Notch-regulated ankyrin repeat protein	-0.6204	0.444657
ENSMUSG00000019796	Lrp11	low density lipoprotein receptor-related protein 1...	-0.6197	0.697067
ENSMUSG00000046280	She	src homology 2 domain-containing transforming prot...	-0.6194	0.49252
ENSMUSG00000024790	Sac3d1	SAC3 domain containing 1	-0.619	0.390774
ENSMUSG00000061731	Ext1	exostosin glycosyltransferase 1	0.6188	0.469052
ENSMUSG00000036743	Psma8	proteasome subunit alpha 8	-0.6172	0.490018
ENSMUSG00000032849	Abcc4	ATP-binding cassette, sub-family C member 4	-0.617	0.221777
ENSMUSG00000038729	Pakap	paralemmin A kinase anchor protein	0.6169	0.748334
ENSMUSG00000061477	Rps7	ribosomal protein S7	0.6164	0.0171889
ENSMUSG00000030117	Gdf3	growth differentiation factor 3	0.6162	0.842804
ENSMUSG00000089945	Pakap	paralemmin A kinase anchor protein	0.6158	0.748334
ENSMUSG00000041754	Trem3	triggering receptor expressed on myeloid cells 3	0.615	0.748899
ENSMUSG00000036564	Ndrg4	N-myc downstream regulated gene 4	-0.6145	0.673509
ENSMUSG00000022197	Pdzd2	PDZ domain containing 2	-0.6143	0.444657
ENSMUSG00000020085	Aifm2	apoptosis-inducing factor, mitochondrion-associate...	-0.6135	0.730701
ENSMUSG00000038388	Pals2	protein associated with LIN7 2, MAGUK family membe...	-0.6127	0.460092
ENSMUSG00000099398	Ms4a14	membrane-spanning 4-domains, subfamily A, member 1...	0.6127	0.539089
ENSMUSG00000039774	Galnt12	polypeptide N-acetylgalactosaminyltransferase 12	-0.6126	0.297046
ENSMUSG00000026435	Slc45a3	solute carrier family 45, member 3	-0.6124	0.746384
ENSMUSG00000020520	Galnt10	polypeptide N-acetylgalactosaminyltransferase 10	-0.6122	0.109062
ENSMUSG00000054404	Slfn5	schlafen 5	0.6121	0.709593
ENSMUSG00000073409	H2-Q6	histocompatibility 2, Q region locus 6	0.6116	0.426361
ENSMUSG00000022358	Fbxo32	F-box protein 32	-0.6115	0.205294
ENSMUSG00000004455	Ppp1cc	protein phosphatase 1 catalytic subunit gamma	-0.6113	0.209819
ENSMUSG00000021495	Fam193b	family with sequence similarity 193, member B	0.6106	0.0480967
ENSMUSG00000002732	Fkbp7	FK506 binding protein 7	-0.6103	0.3278
ENSMUSG00000004267	Eno2	enolase 2, gamma neuronal	0.61	0.71249
ENSMUSG00000023809	Rps6ka2	ribosomal protein S6 kinase, polypeptide 2	-0.6099	0.607008
ENSMUSG00000028669	Pithd1	PITH (C-terminal proteasome-interacting domain of ...	-0.6097	0.389245
ENSMUSG00000035385	Ccl2	C-C motif chemokine ligand 2	0.6094	0.0161541
ENSMUSG00000040721	Zfhx2	zinc finger homeobox 2	0.6094	0.744459
ENSMUSG00000037514	Pank2	pantothenate kinase 2	-0.6086	0.0910627
ENSMUSG00000031780	Ccl17	C-C motif chemokine ligand 17	0.6079	0.758644
ENSMUSG00000048450	Msx1	msh homeobox 1	0.6078	0.451268
ENSMUSG00000004591	Pkn2	protein kinase N2	-0.6078	0.148597
ENSMUSG00000038060	Dlec1	deleted in lung and esophageal cancer 1	-0.6077	0.943096
ENSMUSG00000072941	Sod3	superoxide dismutase 3, extracellular	0.6075	0.93334
ENSMUSG00000071644	Eef1g	eukaryotic translation elongation factor 1 gamma	0.6069	0.0004442
ENSMUSG00000027580	Helz2	helicase with zinc finger 2, transcriptional coact...	0.6063	0.636931
ENSMUSG00000047187	Rab2a	RAB2A, member RAS oncogene family	-0.6054	0.496297
ENSMUSG00000025858	Get4	golgi to ER traffic protein 4	-0.6053	0.350551
ENSMUSG00000097221	1810049J17Rik	RIKEN cDNA 1810049J17 gene	-0.6044	0.611072
ENSMUSG00000045502	Hcar2	hydroxycarboxylic acid receptor 2	0.6043	0.150794
ENSMUSG00000038582	Pptc7	PTC7 protein phosphatase homolog	-0.6041	0.227104
ENSMUSG00000028989	Angptl7	angiopoietin-like 7	-0.604	0.295175
ENSMUSG00000038594	Cep85l	centrosomal protein 85-like	-0.6038	0.669413
ENSMUSG00000023067	Cdkn1a	cyclin dependent kinase inhibitor 1A	0.6038	0.013557
ENSMUSG00000028517	Plpp3	phospholipid phosphatase 3	-0.6037	0.669413
ENSMUSG00000050796	B3galt6	UDP-Gal:betaGal beta 1,3-galactosyltransferase, po...	-0.6033	0.336321
ENSMUSG00000022389	Tef	thyrotroph embryonic factor	-0.603	0.156331
ENSMUSG00000002289	Angptl4	angiopoietin-like 4	0.6028	1
ENSMUSG00000040147	Maob	monoamine oxidase B	0.6021	0.611225
ENSMUSG00000026014	Raph1	Ras association (RalGDS/AF-6) and pleckstrin homol...	0.6012	0.819419
ENSMUSG00000027533	Fabp5	fatty acid binding protein 5, epidermal	0.601	0.556222
ENSMUSG00000069833	Ahnak	AHNAK nucleoprotein	0.6004	0.403762
ENSMUSG00000091971	Hspa1a	heat shock protein 1A	0.6004	0.651622
ENSMUSG00000024897	Apba1	amyloid beta precursor protein binding family A me...	-0.5994	0.706835
ENSMUSG00000029538	Srsf9	serine and arginine-rich splicing factor 9	-0.5988	0.316873
ENSMUSG00000021846	Peli2	pellino 2	-0.5976	0.321185
ENSMUSG00000024679	Ms4a6d	membrane-spanning 4-domains, subfamily A, member 6...	0.597	0.0016555
ENSMUSG00000047419	Cmya5	cardiomyopathy associated 5	-0.5967	0.5026
ENSMUSG00000046417	Lrrc75a	leucine rich repeat containing 75A	-0.5965	0.273614
ENSMUSG00000069272	H2ac8	H2A clustered histone 8	-0.5964	0.674412
ENSMUSG00000078619	Smarcd2	SWI/SNF related, matrix associated, actin dependen...	-0.5963	0.402614
ENSMUSG00000061024	Rrs1	ribosome biogenesis regulator 1	-0.5961	0.483378
ENSMUSG00000078866	Zfp970	zinc finger protein 970	-0.596	0.444657
ENSMUSG00000063689	H2ac21	H2A clustered histone 21	-0.5954	0.712774
ENSMUSG00000035900	Gramd4	GRAM domain containing 4	-0.5951	0.439628
ENSMUSG00000054321	Taf4b	TATA-box binding protein associated factor 4b	-0.5949	0.601467
ENSMUSG00000041308	Sntb2	syntrophin, basic 2	-0.5948	0.697486
ENSMUSG00000071103	Cfap96	cilia and flagella associated protein 96	-0.5942	0.448933
ENSMUSG00000040312	Cchcr1	coiled-coil alpha-helical rod protein 1	0.5933	0.39798
ENSMUSG00000003352	Cacnb3	calcium channel, voltage-dependent, beta 3 subunit	0.5927	0.647837
ENSMUSG00000032375	Aph1b	aph1 homolog B, gamma secretase subunit	-0.5923	0.820572
ENSMUSG00000025158	Rfng	RFNG O-fucosylpeptide 3-beta-N-acetylglucosaminylt...	-0.5922	0.469526
ENSMUSG00000034071	Zfp551	zinc finger protein 551	0.5917	0.725544
ENSMUSG00000071723	Gspt2	G1 to S phase transition 2	-0.5914	0.605601
ENSMUSG00000005611	Irag1	inositol 1,4,5-triphosphate receptor associated 1	0.5884	0.748334
ENSMUSG00000032285	Dnaja4	DnaJ heat shock protein family (Hsp40) member A4	-0.5878	0.491727
ENSMUSG00000027602	Map1lc3a	microtubule-associated protein 1 light chain 3 alp...	-0.5865	0.205088
ENSMUSG00000026426	Arl8a	ADP-ribosylation factor-like 8A	-0.5854	0.23866
ENSMUSG00000031586	Rbpms	RNA binding protein gene with multiple splicing	-0.5852	0.485347
ENSMUSG00000030087	Klf15	Kruppel-like transcription factor 15	-0.5852	0.331011
ENSMUSG00000028484	Psip1	PC4 and SFRS1 interacting protein 1	-0.5851	0.532331
ENSMUSG00000022357	Klhl38	kelch-like 38	-0.585	0.419056
ENSMUSG00000026158	Ogfrl1	opioid growth factor receptor-like 1	-0.5845	0.101699
ENSMUSG00000036339	Tmem260	transmembrane protein 260	-0.5833	0.142233
ENSMUSG00000027829	Ccnl1	cyclin L1	-0.5813	0.0162675
ENSMUSG00000091736	Yy2	Yy2 transcription factor	-0.5812	0.541194
ENSMUSG00000070643	Sox13	SRY (sex determining region Y)-box 13	-0.58	0.746384
ENSMUSG00000073676	Hspe1	heat shock protein 1 (chaperonin 10)	0.58	0.0372214
ENSMUSG00000042854	Trp53rkb	transformation related protein 53 regulating kinas...	-0.5799	0.705203
ENSMUSG00000045817	Zfp36l2	zinc finger protein 36, C3H type-like 2	-0.5795	0.0997608
ENSMUSG00000025185	Loxl4	lysyl oxidase-like 4	-0.5793	0.727287
ENSMUSG00000029648	Flt1	FMS-like tyrosine kinase 1	-0.5793	0.721193
ENSMUSG00000041809	Efhc1	EF-hand domain (C-terminal) containing 1	-0.5781	0.97495
ENSMUSG00000025103	Btbd1	BTB domain containing 1	-0.5781	0.403762
ENSMUSG00000028617	Lrrc42	leucine rich repeat containing 42	0.578	0.702549
ENSMUSG00000044030	Irf2bp1	interferon regulatory factor 2 binding protein 1	-0.5777	0.364364
ENSMUSG00000003135	Cnot11	CCR4-NOT transcription complex, subunit 11	-0.5777	0.423397
ENSMUSG00000032661	Oas3	2'-5' oligoadenylate synthetase 3	0.5775	0.679885
ENSMUSG00000020788	Atp2a3	ATPase, Ca++ transporting, ubiquitous	-0.5771	0.27521
ENSMUSG00000070436	Serpinh1	serine (or cysteine) peptidase inhibitor, clade H,...	0.5766	0.534355
ENSMUSG00000052477	Sp140l2	Sp140 nuclear body protein like 2	0.5766	0.86816
ENSMUSG00000007655	Cav1	caveolin 1, caveolae protein	-0.5765	0.850587
ENSMUSG00000060550	H2-Q7	histocompatibility 2, Q region locus 7	0.576	0.481054
ENSMUSG00000003746	Man1a	mannosidase 1, alpha	-0.5759	0.274509
ENSMUSG00000002007	Srpk3	serine/arginine-rich protein specific kinase 3	-0.5757	0.0146322
ENSMUSG00000001175	Calm1	calmodulin 1	0.5757	0.0027991
ENSMUSG00000006356	Crip2	cysteine rich protein 2	0.5756	0.905166
ENSMUSG00000002076	Hsf2bp	heat shock transcription factor 2 binding protein	-0.5756	0.61838
ENSMUSG00000026399	Cd55	CD55 molecule, decay accelerating factor for compl...	0.5752	0.754335
ENSMUSG00000028937	Acot7	acyl-CoA thioesterase 7	0.5752	0.344912
ENSMUSG00000023272	Creld2	cysteine-rich with EGF-like domains 2	0.575	0.135334
ENSMUSG00000027367	Stard7	StAR related lipid transfer domain containing 7	-0.575	0.0517768
ENSMUSG00000017830	Dhx58	DExH-box helicase 58	0.5742	0.0197052
ENSMUSG00000092609	Gm20481	predicted gene 20481	0.5739	0.653669
ENSMUSG00000031951	Tmem231	transmembrane protein 231	-0.5726	0.542223
ENSMUSG00000002885	Adgre5	adhesion G protein-coupled receptor E5	0.5721	0.268384
ENSMUSG00000003484	Cyp4f18	cytochrome P450, family 4, subfamily f, polypeptid...	0.5706	0.0878297
ENSMUSG00000078439	Smim24	small integral membrane protein 24	0.5705	1
ENSMUSG00000053318	Slamf8	SLAM family member 8	0.5701	0.0313424
ENSMUSG00000047604	Frat2	frequently rearranged in advanced T cell lymphomas...	-0.57	0.729511
ENSMUSG00000074802	Gas2l3	growth arrest-specific 2 like 3	0.57	0.570891
ENSMUSG00000058756	Thra	thyroid hormone receptor alpha	-0.5698	0.673692
ENSMUSG00000019027	Dnah1	dynein, axonemal, heavy chain 1	0.5692	0.545046
ENSMUSG00000091418	Gm3164	predicted gene 3164	-0.5684	0.608276
ENSMUSG00000049521	Cdc42ep1	CDC42 effector protein 1	-0.5681	0.526066
ENSMUSG00000022763	Aifm3	apoptosis-inducing factor, mitochondrion-associate...	0.5677	0.748334
ENSMUSG00000039616	Mocos	molybdenum cofactor sulfurase	0.5671	0.76191
ENSMUSG00000031671	Setd6	SET domain containing 6	-0.5664	0.520064
ENSMUSG00000034009	Rxfp1	relaxin/insulin-like family peptide receptor 1	-0.5663	0.718913
ENSMUSG00000040711	Sh3pxd2b	SH3 and PX domains 2B	0.5662	0.920055
ENSMUSG00000043068	Fam89a	family with sequence similarity 89, member A	-0.566	0.677694
ENSMUSG00000060591	Ifitm2	interferon induced transmembrane protein 2	0.5659	0.332643
ENSMUSG00000022220	Adcy4	adenylate cyclase 4	0.5657	0.850026
ENSMUSG00000039994	Timeless	timeless circadian clock 1	0.5655	0.227104
ENSMUSG00000022034	Esco2	establishment of sister chromatid cohesion N-acety...	-0.5654	0.746384
ENSMUSG00000003955	Fam162a	family with sequence similarity 162, member A	0.5653	0.113859
ENSMUSG00000087141	Plcxd2	phosphatidylinositol-specific phospholipase C, X d...	0.5651	0.757831
ENSMUSG00000030149	Klrk1	killer cell lectin-like receptor subfamily K, memb...	0.5651	0.727287
ENSMUSG00000038463	Olfml2b	olfactomedin-like 2B	-0.565	0.125985
ENSMUSG00000021701	Plk2	polo like kinase 2	0.5649	0.577013
ENSMUSG00000019590	Cyb561	cytochrome b-561	0.5644	0.819419
ENSMUSG00000002409	Dyrk1b	dual-specificity tyrosine phosphorylation regulate...	-0.5642	0.756794
ENSMUSG00000038552	Fndc4	fibronectin type III domain containing 4	-0.564	0.840401
ENSMUSG00000067274	Rplp0	ribosomal protein lateral stalk subunit P0	0.5634	0.0009088
ENSMUSG00000068457	Uty	ubiquitously transcribed tetratricopeptide repeat ...	0.5632	0.819419
ENSMUSG00000091228	Nme1nme2	NME/NM23 nucleoside diphosphate kinase 1 and 2 rea...	0.5629	0.0007472
ENSMUSG00000020773	Trim47	tripartite motif-containing 47	-0.5627	0.201364
ENSMUSG00000069792	Wfdc17	WAP four-disulfide core domain 17	0.5622	0.68391
ENSMUSG00000029419	Ajm1	apical junction component 1	-0.5618	0.396849
ENSMUSG00000031506	Ptpn7	protein tyrosine phosphatase, non-receptor type 7	0.5616	0.665583
ENSMUSG00000034292	Traf3ip1	TRAF3 interacting protein 1	-0.5615	0.702549
ENSMUSG00000052305	Hbb-b1	hemoglobin, beta adult major chain	-0.5614	1
ENSMUSG00000049723	Mmp12	matrix metallopeptidase 12	-0.5611	0.819419
ENSMUSG00000032575	Manf	mesencephalic astrocyte-derived neurotrophic facto...	0.5611	0.0089274
ENSMUSG00000026879	Gsn	gelsolin	0.561	0.236268
ENSMUSG00000056673	Kdm5d	lysine demethylase 5D	0.5609	0.819419
ENSMUSG00000035469	Rcbtb1	regulator of chromosome condensation (RCC1) and BT...	-0.5606	0.182474
ENSMUSG00000030103	Bhlhe40	basic helix-loop-helix family, member e40	0.5606	0.477022
ENSMUSG00000031352	Hccs	holocytochrome c synthetase	-0.5604	0.230892
ENSMUSG00000026821	Ralgds	ral guanine nucleotide dissociation stimulator	-0.5604	0.414197
ENSMUSG00000040010	Slc7a5	solute carrier family 7 (cationic amino acid trans...	-0.5603	0.119719
ENSMUSG00000050138	Kcnk12	potassium channel, subfamily K, member 12	-0.56	0.727287
ENSMUSG00000069516	Lyz2	lysozyme 2	0.5598	0.251462
ENSMUSG00000030498	Gas2	growth arrest specific 2	-0.5594	0.607008
ENSMUSG00000028889	Yrdc	yrdC domain containing (E.coli)	-0.5583	0.696959
ENSMUSG00000029221	Slc30a9	solute carrier family 30 (zinc transporter), membe...	-0.5582	0.038793
ENSMUSG00000090877	Hspa1b	heat shock protein 1B	0.5581	0.775678
ENSMUSG00000034853	Acot11	acyl-CoA thioesterase 11	-0.5575	0.731396
ENSMUSG00000033540	Idua	iduronidase, alpha-L	-0.5573	0.002599
ENSMUSG00000017417	Plxdc1	plexin domain containing 1	-0.5572	0.312603
ENSMUSG00000030699	Tbx6	T-box 6	-0.557	0.75825
ENSMUSG00000098274	Rpl24	ribosomal protein L24	0.5564	0.138062
ENSMUSG00000034487	Poglut3	protein O-glucosyltransferase 3	-0.5564	0.265049
ENSMUSG00000073591	Pcdhb22	protocadherin beta 22	-0.5563	0.755741
ENSMUSG00000022742	Cpox	coproporphyrinogen oxidase	-0.5559	0.409289
ENSMUSG00000028051	Hcn3	hyperpolarization-activated, cyclic nucleotide-gat...	-0.5554	0.97495
ENSMUSG00000031751	Amfr	autocrine motility factor receptor	-0.5552	0.0483589
ENSMUSG00000005973	Rcn1	reticulocalbin 1	-0.5549	0.37648
ENSMUSG00000048327	Ckap2l	cytoskeleton associated protein 2-like	0.5548	0.720898
ENSMUSG00000044502	Bod1	biorientation of chromosomes in cell division 1	-0.5548	0.573321
ENSMUSG00000005958	Ephb3	Eph receptor B3	-0.5547	0.571115
ENSMUSG00000039989	Cbx4	chromobox 4	-0.5545	0.504178
ENSMUSG00000042265	Trem1	triggering receptor expressed on myeloid cells 1	-0.5542	0.606586
ENSMUSG00000060402	Chst8	carbohydrate sulfotransferase 8	-0.554	0.222436
ENSMUSG00000043263	Ifi209	interferon activated gene 209	0.554	0.344651
ENSMUSG00000027669	Gnb4	guanine nucleotide binding protein (G protein), be...	0.5538	0.333711
ENSMUSG00000025409	Mbd6	methyl-CpG binding domain protein 6	0.5537	0.641293
ENSMUSG00000078716	Tmem8b	transmembrane protein 8B	-0.5528	0.667343
ENSMUSG00000048027	Rgmb	repulsive guidance molecule family member B	-0.5527	0.200648
ENSMUSG00000052565	H1f3	H1.3 linker histone, cluster member	-0.5521	0.784331
ENSMUSG00000014771	Pdcd2	programmed cell death 2	-0.5519	0.372502
ENSMUSG00000091405	H4c14	H4 clustered histone 14	-0.5512	0.37833
ENSMUSG00000025794	Rpl14	ribosomal protein L14	0.5511	0.0043748
ENSMUSG00000039410	Prdm16	PR domain containing 16	0.5509	0.589795
ENSMUSG00000036273	Lrrk2	leucine-rich repeat kinase 2	0.5504	0.53268
ENSMUSG00000079415	Cntf	ciliary neurotrophic factor	0.55	0.932956
ENSMUSG00000050677	Ccdc96	coiled-coil domain containing 96	0.5499	0.940864
ENSMUSG00000034557	Zfyve9	zinc finger, FYVE domain containing 9	-0.5496	0.746384
ENSMUSG00000061540	Orm2	orosomucoid 2	-0.549	0.759315
ENSMUSG00000036560	Lgi4	leucine-rich repeat LGI family, member 4	0.5488	0.376999
ENSMUSG00000074657	Kif5a	kinesin family member 5A	0.5485	0.76327
ENSMUSG00000048905	Bnip5	BCL2 interacting protein 5	-0.5484	0.727904
ENSMUSG00000062070	Pgk1	phosphoglycerate kinase 1	0.5478	0.0249472
ENSMUSG00000047880	Cxcr5	C-X-C motif chemokine receptor 5	0.5468	0.759728
ENSMUSG00000017167	Cntnap1	contactin associated protein-like 1	-0.5467	0.840435
ENSMUSG00000022351	Sqle	squalene epoxidase	0.5465	0.593634
ENSMUSG00000028211	Trp53inp1	transformation related protein 53 inducible nuclea...	-0.5464	0.392594
ENSMUSG00000070331	Qrich2	glutamine rich 2	-0.5459	0.886824
ENSMUSG00000028416	Bag1	BCL2-associated athanogene 1	-0.5457	0.578376
ENSMUSG00000043300	B3galnt1	UDP-GalNAc:betaGlcNAc beta 1,3-galactosaminyltrans...	-0.5451	0.0198395
ENSMUSG00000022184	Fbxo4	F-box protein 4	-0.5445	0.341399
ENSMUSG00000006576	Slc4a3	solute carrier family 4 (anion exchanger), member ...	0.5433	0.957813
ENSMUSG00000017776	Crk	v-crk avian sarcoma virus CT10 oncogene homolog	-0.5433	0.225088
ENSMUSG00000036197	Gxylt1	glucoside xylosyltransferase 1	-0.5432	0.172032
ENSMUSG00000031983	2310022B05Rik	RIKEN cDNA 2310022B05 gene	-0.5432	0.619866
ENSMUSG00000024397	Aif1	allograft inflammatory factor 1	0.5431	0.0114467
ENSMUSG00000094796	Tcstv4	Tcstv family member 4	0.5426	0.730397
ENSMUSG00000034908	Sidt2	SID1 transmembrane family, member 2	-0.5425	0.0887379
ENSMUSG00000021629	Slc30a5	solute carrier family 30 (zinc transporter), membe...	-0.5425	0.45305
ENSMUSG00000024530	Prelid3a	PRELI domain containing 3A	0.5419	0.746384
ENSMUSG00000029614	Rpl6	ribosomal protein L6	0.5419	0.0004392
ENSMUSG00000063696	Gm8730	ribosomal protein, large, P0 pseudogene	0.5416	0.350578
ENSMUSG00000026896	Ifih1	interferon induced with helicase C domain 1	0.5415	0.282744
ENSMUSG00000025262	Fam120c	family with sequence similarity 120, member C	-0.5411	0.70044
ENSMUSG00000063229	Ldha	lactate dehydrogenase A	0.5411	0.0066725
ENSMUSG00000036158	Prickle1	prickle planar cell polarity protein 1	-0.54	0.890307
ENSMUSG00000035298	Klhl35	kelch-like 35	-0.5399	0.759315
ENSMUSG00000021130	Galnt16	polypeptide N-acetylgalactosaminyltransferase 16	-0.5399	0.803208
ENSMUSG00000018012	Rac3	Rac family small GTPase 3	-0.5387	0.601116
ENSMUSG00000027011	Ube2e3	ubiquitin-conjugating enzyme E2E 3	-0.5381	0.106744
ENSMUSG00000057841	Rpl32	ribosomal protein L32	0.5377	0.0064998
ENSMUSG00000020496	Rnf187	ring finger protein 187	-0.5374	0.468612
ENSMUSG00000025423	Pias2	protein inhibitor of activated STAT 2	-0.5369	0.17774
ENSMUSG00000022812	Gsk3b	glycogen synthase kinase 3 beta	-0.5367	0.156495
ENSMUSG00000029814	Igf2bp3	insulin-like growth factor 2 mRNA binding protein ...	-0.5366	0.813108
ENSMUSG00000033255	Gm5134	predicted gene 5134	-0.5364	0.656604
ENSMUSG00000021614	Vcan	versican	-0.5364	0.750965
ENSMUSG00000042246	Tmc7	transmembrane channel-like gene family 7	-0.5363	0.219157
ENSMUSG00000022124	Fbxl3	F-box and leucine-rich repeat protein 3	-0.5362	0.0680506
ENSMUSG00000026064	Ptp4a1	protein tyrosine phosphatase 4a1	-0.5362	0.291792
ENSMUSG00000030782	Tgfb1i1	transforming growth factor beta 1 induced transcri...	0.5362	0.748334
ENSMUSG00000035745	Grin3b	glutamate receptor, ionotropic, NMDA3B	0.5357	0.703937
ENSMUSG00000052155	Acvr2a	activin receptor IIA	-0.5356	0.409289
ENSMUSG00000049734	Trex1	three prime repair exonuclease 1	0.5356	0.0009088
ENSMUSG00000039783	Kmo	kynurenine 3-monooxygenase	0.5355	1
ENSMUSG00000040820	Hlcs	holocarboxylase synthetase (biotin- [propriony-Coe...	-0.5353	0.727495
ENSMUSG00000026630	Batf3	basic leucine zipper transcription factor, ATF-lik...	0.5353	0.204061
ENSMUSG00000024079	Eif2ak2	eukaryotic translation initiation factor 2-alpha k...	0.5347	0.174641
ENSMUSG00000040658	Dnph1	2'-deoxynucleoside 5'-phosphate N-hydrolase 1	0.5346	0.731396
ENSMUSG00000063450	Syne2	spectrin repeat containing, nuclear envelope 2	-0.5343	0.636931
ENSMUSG00000049985	Ankrd55	ankyrin repeat domain 55	0.5341	0.819419
ENSMUSG00000024589	Nedd4l	neural precursor cell expressed, developmentally d...	-0.5338	0.501195
ENSMUSG00000038894	Irs2	insulin receptor substrate 2	-0.5337	0.496108
ENSMUSG00000006931	P3h4	prolyl 3-hydroxylase family member 4 (non-enzymati...	-0.5337	0.746522
ENSMUSG00000021326	Trim27	tripartite motif-containing 27	-0.5332	0.341034
ENSMUSG00000033170	Card10	caspase recruitment domain family, member 10	0.5329	0.86816
ENSMUSG00000062328	Rpl17	ribosomal protein L17	0.5328	0.10708
ENSMUSG00000030393	Zik1	zinc finger protein interacting with K protein 1	-0.5318	0.629791
ENSMUSG00000022474	Pmm1	phosphomannomutase 1	0.5317	0.341845
ENSMUSG00000026159	Agfg1	ArfGAP with FG repeats 1	-0.5314	0.318738
ENSMUSG00000002068	Ccne1	cyclin E1	-0.531	0.668457
ENSMUSG00000036181	H1f2	H1.2 linker histone, cluster member	-0.531	0.141307
ENSMUSG00000028957	Per3	period circadian clock 3	-0.5307	0.535111
ENSMUSG00000028069	Gpatch4	G patch domain containing 4	0.5303	0.103055
ENSMUSG00000020267	Hint1	histidine triad nucleotide binding protein 1	0.5302	0.0205362
ENSMUSG00000030930	Chst15	carbohydrate sulfotransferase 15	-0.5293	0.167256
ENSMUSG00000071653	1810009A15Rik	RIKEN cDNA 1810009A15 gene	0.5292	0.0348192
ENSMUSG00000036622	Atp13a2	ATPase type 13A2	-0.5291	0.376803
ENSMUSG00000039244	Ints15	integrator complex subunit 15	-0.5283	0.286857
ENSMUSG00000037161	Mgarp	mitochondria localized glutamic acid rich protein	0.528	0.849289
ENSMUSG00000047959	Kcna3	potassium voltage-gated channel, shaker-related su...	-0.528	0.465927
ENSMUSG00000033965	Slc16a2	solute carrier family 16 (monocarboxylic acid tran...	0.5278	0.336957
ENSMUSG00000022489	Pde1b	phosphodiesterase 1B, Ca2+-calmodulin dependent	0.5277	0.188717
ENSMUSG00000030752	Kdm8	lysine (K)-specific demethylase 8	0.5271	0.650153
ENSMUSG00000032290	Ptpn9	protein tyrosine phosphatase, non-receptor type 9	-0.5271	0.641214
ENSMUSG00000056501	Cebpb	CCAAT/enhancer binding protein beta	-0.527	0.794596
ENSMUSG00000056290	Ms4a4b	membrane-spanning 4-domains, subfamily A, member 4...	0.5268	1
ENSMUSG00000051727	Kctd14	potassium channel tetramerisation domain containin...	0.5265	0.541339
ENSMUSG00000026082	Rev1	REV1, DNA directed polymerase	-0.5262	0.257679
ENSMUSG00000024730	Ms4a8a	membrane-spanning 4-domains, subfamily A, member 8...	0.5255	0.759315
ENSMUSG00000047409	Ctdspl	CTD small phosphatase like	0.5254	1
ENSMUSG00000022272	Myo10	myosin X	0.5254	0.879299
ENSMUSG00000038349	Plcl1	phospholipase C-like 1	-0.5241	0.515426
ENSMUSG00000025650	Col7a1	collagen, type VII, alpha 1	-0.5241	0.607008
ENSMUSG00000009013	Dynll1	dynein light chain LC8-type 1	0.5237	0.0146764
ENSMUSG00000023982	Guca1a	guanylate cyclase activator 1a (retina)	0.5237	0.669413
ENSMUSG00000027677	Ttc14	tetratricopeptide repeat domain 14	-0.5236	0.196979
ENSMUSG00000045071	E130308A19Rik	RIKEN cDNA E130308A19 gene	-0.5236	0.746384
ENSMUSG00000047675	Rps8	ribosomal protein S8	0.5234	0.002379
ENSMUSG00000019774	Mtrf1l	mitochondrial translational release factor 1-like	-0.5234	0.553405
ENSMUSG00000043415	Otud1	OTU domain containing 1	-0.523	0.491418
ENSMUSG00000030677	Kif22	kinesin family member 22	0.5227	0.78533
ENSMUSG00000036833	Pnpla7	patatin-like phospholipase domain containing 7	-0.5227	0.0096588
ENSMUSG00000024695	Zfp91	zinc finger protein 91	0.5221	0.364636
ENSMUSG00000089809	A930011G23Rik	RIKEN cDNA A930011G23 gene	0.5221	0.819419
ENSMUSG00000031553	Adam3	ADAM metallopeptidase domain 3	-0.5215	0.658953
ENSMUSG00000038212	Mfsd14b	major facilitator superfamily domain containing 14...	-0.5214	0.384605
ENSMUSG00000000202	Btbd17	BTB domain containing 17	-0.5209	0.530768
ENSMUSG00000001025	S100a6	S100 calcium binding protein A6 (calcyclin)	0.5208	0.860413
ENSMUSG00000025764	Jade1	jade family PHD finger 1	-0.5206	0.415102
ENSMUSG00000022218	Tgm1	transglutaminase 1, K polypeptide	0.5204	0.718913
ENSMUSG00000025161	Slc16a3	solute carrier family 16 (monocarboxylic acid tran...	0.5202	0.0940903
ENSMUSG00000051185	Fam174a	family with sequence similarity 174, member A	-0.5198	0.384605
ENSMUSG00000027784	Ppm1l	protein phosphatase 1 (formerly 2C)-like	-0.5197	0.212877
ENSMUSG00000037104	Socs5	suppressor of cytokine signaling 5	-0.5191	0.481795
ENSMUSG00000025509	Pnpla2	patatin-like phospholipase domain containing 2	-0.5191	0.030286
ENSMUSG00000030421	Uri1	URI1, prefoldin-like chaperone	-0.5186	0.513194
ENSMUSG00000063524	Eno1	enolase 1, alpha non-neuron	0.5184	0.0051903
ENSMUSG00000102752	Gm7694	predicted gene 7694	-0.5184	0.554852
ENSMUSG00000034738	Nostrin	nitric oxide synthase trafficker	0.5181	0.861869
ENSMUSG00000023885	Thbs2	thrombospondin 2	-0.5181	0.718913
ENSMUSG00000001847	Rac1	Rac family small GTPase 1	-0.5181	0.412032
ENSMUSG00000040084	Bub1b	BUB1B, mitotic checkpoint serine/threonine kinase	0.5176	0.695658
ENSMUSG00000028124	Gclm	glutamate-cysteine ligase, modifier subunit	-0.5175	0.645326
ENSMUSG00000030695	Aldoa	aldolase A, fructose-bisphosphate	0.5173	0.0020751
ENSMUSG00000073755	5730409E04Rik	RIKEN cDNA 5730409E04Rik gene	0.5173	0.621894
ENSMUSG00000019768	Esr1	estrogen receptor 1 (alpha)	-0.5172	0.683747
ENSMUSG00000006057	Atp5mc1	ATP synthase membrane subunit c locus 1	0.5171	0.003741
ENSMUSG00000057191	AB124611	cDNA sequence AB124611	0.5165	0.318009
ENSMUSG00000038685	Rtel1	regulator of telomere elongation helicase 1	-0.5162	0.289203
ENSMUSG00000064105	Cnnm2	cyclin M2	-0.5161	0.552434
ENSMUSG00000045875	Adra1a	adrenergic receptor, alpha 1a	-0.5159	0.93334
ENSMUSG00000005732	Ranbp1	RAN binding protein 1	0.5158	0.0056623
ENSMUSG00000078185	Chml	choroideremia-like	-0.5149	0.669413
ENSMUSG00000002803	Btbd6	BTB domain containing 6	-0.5149	0.601819
ENSMUSG00000019558	Slc6a8	solute carrier family 6 (neurotransmitter transpor...	0.5147	0.922595
ENSMUSG00000032624	Eml4	echinoderm microtubule associated protein like 4	-0.5146	0.0245852
ENSMUSG00000025223	Ldb1	LIM domain binding 1	-0.5145	0.167256
ENSMUSG00000042208	Sanbr	SANT and BTB domain regulator of CSR	-0.5141	0.656776
ENSMUSG00000001827	Folr1	folate receptor alpha	0.514	1
ENSMUSG00000038900	Rpl12	ribosomal protein L12	0.5139	0.0187565
ENSMUSG00000026778	Prkcq	protein kinase C, theta	-0.5139	0.76327
ENSMUSG00000052146	Rps10	ribosomal protein S10	0.5137	0.0972779
ENSMUSG00000075256	Cerkl	ceramide kinase-like	0.5137	0.932956
ENSMUSG00000095193	Gm20939	predicted gene, 20939	-0.5137	0.706835
ENSMUSG00000002835	Chaf1a	chromatin assembly factor 1, subunit A	-0.5133	0.607008
ENSMUSG00000041702	Btbd7	BTB domain containing 7	-0.5133	0.567486
ENSMUSG00000050335	Lgals3	lectin, galactose binding, soluble 3	0.5132	0.404329
ENSMUSG00000031362	Xlr4c	X-linked lymphocyte-regulated 4C	0.5131	0.932956
ENSMUSG00000024697	Gna14	guanine nucleotide binding protein, alpha 14	-0.5127	0.531101
ENSMUSG00000021794	Glud1	glutamate dehydrogenase 1	-0.5124	0.163464
ENSMUSG00000034120	Srsf2	serine and arginine-rich splicing factor 2	-0.5122	0.080958
ENSMUSG00000021565	Slc6a19	solute carrier family 6 (neurotransmitter transpor...	-0.5117	0.964329
ENSMUSG00000027893	Ahcyl1	S-adenosylhomocysteine hydrolase-like 1	-0.5113	0.291792
ENSMUSG00000017404	Rpl19	ribosomal protein L19	0.5112	0.0006356
ENSMUSG00000048264	Dip2c	disco interacting protein 2 homolog C	-0.5109	0.748334
ENSMUSG00000071866	Ppia	peptidylprolyl isomerase A	0.5104	0.0034234
ENSMUSG00000004558	Ndrg2	N-myc downstream regulated gene 2	0.5104	0.697486
ENSMUSG00000030769	Slc5a11	solute carrier family 5 (sodium/glucose cotranspor...	0.5102	0.819419
ENSMUSG00000051228	Nyx	nyctalopin	0.5102	0.93334
ENSMUSG00000022769	Sdf2l1	stromal cell-derived factor 2-like 1	0.5102	0.0247463
ENSMUSG00000020961	Ston2	stonin 2	0.5099	0.576236
ENSMUSG00000043439	Epop	elongin BC and polycomb repressive complex 2 assoc...	-0.5098	0.850587
ENSMUSG00000014470	Rnf166	ring finger protein 166	-0.5095	0.244809
ENSMUSG00000059273	Zc3h4	zinc finger CCCH-type containing 4	0.5094	0.402203
ENSMUSG00000006818	Sod2	superoxide dismutase 2, mitochondrial	0.5089	0.0197705
ENSMUSG00000027806	Tsc22d2	TSC22 domain family, member 2	-0.5088	0.392769
ENSMUSG00000033382	Trappc8	trafficking protein particle complex 8	-0.5081	0.235173
ENSMUSG00000003154	Foxj2	forkhead box J2	-0.508	0.0683123
ENSMUSG00000029530	Ccr9	C-C motif chemokine receptor 9	0.5074	0.849289
ENSMUSG00000078676	Casc3	exon junction complex subunit	-0.5073	0.178013
ENSMUSG00000039232	Stx11	syntaxin 11	0.5073	1
ENSMUSG00000045095	Magi1	membrane associated guanylate kinase, WW and PDZ d...	-0.5071	0.542223
ENSMUSG00000027078	Ube2l6	ubiquitin-conjugating enzyme E2L 6	0.5066	0.0763364
ENSMUSG00000079659	Tmem243	transmembrane protein 243, mitochondrial	-0.5063	0.718913
ENSMUSG00000027552	E2f5	E2F transcription factor 5	-0.5063	0.589795
ENSMUSG00000028412	Slc44a1	solute carrier family 44, member 1	-0.5062	0.809243
ENSMUSG00000040563	Plppr2	phospholipid phosphatase related 2	-0.5061	0.525454
ENSMUSG00000002477	Snrpd1	small nuclear ribonucleoprotein D1	0.506	0.231306
ENSMUSG00000031647	Mfap3l	microfibrillar-associated protein 3-like	-0.506	0.886824
ENSMUSG00000027570	Col9a3	collagen, type IX, alpha 3	0.5051	0.845626
ENSMUSG00000026471	Mr1	major histocompatibility complex, class I-related	-0.5041	0.167171
ENSMUSG00000026712	Mrc1	mannose receptor, C type 1	0.5041	0.619866
ENSMUSG00000010517	Faf1	Fas-associated factor 1	-0.5037	0.519166
ENSMUSG00000027959	Sass6	SAS-6 centriolar assembly protein	0.5033	0.656776
ENSMUSG00000052942	Glis3	GLIS family zinc finger 3	-0.5032	0.573321
ENSMUSG00000046959	Slc26a1	solute carrier family 26 (sulfate transporter), me...	-0.5031	0.356988
ENSMUSG00000020105	Lrig3	leucine-rich repeats and immunoglobulin-like domai...	-0.5028	0.701188
ENSMUSG00000032586	Traip	TRAF-interacting protein	0.5028	0.819419
ENSMUSG00000014778	Fhod1	formin homology 2 domain containing 1	0.5025	0.199201
ENSMUSG00000028936	Rpl22	ribosomal protein L22	0.5024	0.350148
ENSMUSG00000020359	Phykpl	5-phosphohydroxy-L-lysine phospholyase	-0.5024	0.023347
ENSMUSG00000022855	Senp2	SUMO/sentrin specific peptidase 2	-0.5017	0.067061
ENSMUSG00000072966	Gprasp2	G protein-coupled receptor associated sorting prot...	-0.5017	0.573321
ENSMUSG00000020349	Ppp2ca	protein phosphatase 2 (formerly 2A), catalytic sub...	-0.5012	0.423921
ENSMUSG00000037331	Larp1	La ribonucleoprotein 1, translational regulator	0.5009	0.0430949
ENSMUSG00000039662	Icmt	isoprenylcysteine carboxyl methyltransferase	-0.5007	0.215452
ENSMUSG00000007570	Fance	Fanconi anemia, complementation group E	-0.5006	0.376803
ENSMUSG00000034957	Cebpa	CCAAT/enhancer binding protein alpha	-0.5002	0.305825
ENSMUSG00000029657	Hsph1	heat shock 105kDa/110kDa protein 1	0.4998	0.279605
ENSMUSG00000058488	Kl	klotho	0.4995	0.861869
ENSMUSG00000052684	Jun	jun proto-oncogene	-0.4994	0.616557
ENSMUSG00000040028	Elavl1	ELAV like RNA binding protein 1	-0.4993	0.331673
ENSMUSG00000026358	Rgs1	regulator of G-protein signaling 1	-0.4992	0.273229
ENSMUSG00000002870	Mcm2	minichromosome maintenance complex component 2	0.498	0.444657
ENSMUSG00000045284	Dcaf12l1	DDB1 and CUL4 associated factor 12-like 1	0.4979	0.93334
ENSMUSG00000013663	Pten	phosphatase and tensin homolog	-0.4976	0.0161243
ENSMUSG00000025290	Rps24	ribosomal protein S24	0.4973	0.251325
ENSMUSG00000071311	Gpr31b	G protein-coupled receptor 31, D17Leh66b region	0.4973	1
ENSMUSG00000021367	Edn1	endothelin 1	0.4965	0.753405
ENSMUSG00000037224	Zfyve28	zinc finger, FYVE domain containing 28	-0.4962	0.671172
ENSMUSG00000101389	Ms4a4a	membrane-spanning 4-domains, subfamily A, member 4...	0.496	0.497245
ENSMUSG00000027160	Ccdc34	coiled-coil domain containing 34	0.4959	0.758787
ENSMUSG00000018293	Pfn1	profilin 1	0.4957	0.0292049
ENSMUSG00000020932	Gfap	glial fibrillary acidic protein	0.4955	0.932956
ENSMUSG00000030739	Myh14	myosin, heavy polypeptide 14	0.4954	0.748334
ENSMUSG00000018068	Ints2	integrator complex subunit 2	0.4951	0.26972
ENSMUSG00000027637	Rab5if	RAB5 interacting factor	-0.4949	0.77337
ENSMUSG00000078922	Tgtp1	T cell specific GTPase 1	0.4949	0.850026
ENSMUSG00000034427	Myo15b	myosin XVB	-0.4949	0.840435
ENSMUSG00000039988	Ankrd13c	ankyrin repeat domain 13c	-0.4948	0.724912
ENSMUSG00000025207	Sema4g	sema domain, immunoglobulin domain (Ig), transmemb...	0.4946	0.819419
ENSMUSG00000032265	Tent5a	terminal nucleotidyltransferase 5A	-0.4942	0.0396274
ENSMUSG00000038578	Susd1	sushi domain containing 1	-0.4941	0.720845
ENSMUSG00000027993	Trim2	tripartite motif-containing 2	-0.4938	0.182474
ENSMUSG00000031703	Itfg1	integrin alpha FG-GAP repeat containing 1	-0.4938	0.122342
ENSMUSG00000027200	Sema6d	sema domain, transmembrane domain (TM), and cytopl...	-0.4938	0.834324
ENSMUSG00000026499	Acbd3	acyl-Coenzyme A binding domain containing 3	-0.4936	0.166404
ENSMUSG00000003068	Stk11	serine/threonine kinase 11	0.4934	0.318304
ENSMUSG00000046574	Prr12	proline rich 12	0.4933	0.730701
ENSMUSG00000038037	Socs1	suppressor of cytokine signaling 1	-0.4931	0.879432
ENSMUSG00000030432	Rpl28	ribosomal protein L28	0.4931	0.299398
ENSMUSG00000050592	Fam78a	family with sequence similarity 78, member A	0.4931	0.339406
ENSMUSG00000001249	Hpn	hepsin	0.493	0.292495
ENSMUSG00000030156	Cd69	CD69 antigen	0.4927	0.840435
ENSMUSG00000032431	Crtap	cartilage associated protein	-0.4925	0.446325
ENSMUSG00000001020	S100a4	S100 calcium binding protein A4	0.4924	0.860413
ENSMUSG00000057092	Fxyd3	FXYD domain-containing ion transport regulator 3	0.4923	0.645326
ENSMUSG00000079197	Psme2	proteasome (prosome, macropain) activator subunit ...	0.4919	0.0040515
ENSMUSG00000005107	Slc2a9	solute carrier family 2 (facilitated glucose trans...	0.4917	0.758118
ENSMUSG00000057738	Sptan1	spectrin alpha, non-erythrocytic 1	0.4916	0.10708
ENSMUSG00000008496	Pou2f2	POU domain, class 2, transcription factor 2	0.4912	0.0044892
ENSMUSG00000048621	Gm6377	predicted gene 6377	0.4905	0.819419
ENSMUSG00000045968	Teddm2	transmembrane epididymal family member 2	-0.4903	0.0092743
ENSMUSG00000063457	Rps15	ribosomal protein S15	0.4902	0.0265777
ENSMUSG00000021900	Btd	biotinidase	-0.4902	0.0746684
ENSMUSG00000006464	Bbs1	Bardet-Biedl syndrome 1	-0.4902	0.64116
ENSMUSG00000030671	Pde3b	phosphodiesterase 3B, cGMP-inhibited	-0.4902	0.0229139
ENSMUSG00000058388	Phtf1	putative homeodomain transcription factor 1	-0.49	0.424006
ENSMUSG00000047040	Prr15l	proline rich 15-like	-0.4899	0.840435
ENSMUSG00000050035	Fhl4	four and a half LIM domains 4	0.4896	1
ENSMUSG00000025646	Atrip	ATR interacting protein	0.4895	0.0008823
ENSMUSG00000030214	Plbd1	phospholipase B domain containing 1	0.4893	0.776447
ENSMUSG00000079168	Cd209g	CD209g antigen	0.4892	1
ENSMUSG00000029501	Ankle2	ankyrin repeat and LEM domain containing 2	-0.4888	0.305634
ENSMUSG00000047146	Tet1	tet methylcytosine dioxygenase 1	-0.4887	0.730826
ENSMUSG00000030653	Pde2a	phosphodiesterase 2A, cGMP-stimulated	-0.4879	0.250597
ENSMUSG00000064127	Med14	mediator complex subunit 14	-0.4874	0.616818
ENSMUSG00000025477	Inpp5a	inositol polyphosphate-5-phosphatase A	-0.487	0.784331
ENSMUSG00000040459	Arglu1	arginine and glutamate rich 1	0.4869	0.672824
ENSMUSG00000041870	Ankrd13a	ankyrin repeat domain 13a	-0.4868	0.3022
ENSMUSG00000021870	Slmap	sarcolemma associated protein	-0.4868	0.0469905
ENSMUSG00000028851	Nudc	nudC nuclear distribution protein	0.4866	0.0037788
ENSMUSG00000062585	Cnr2	cannabinoid receptor 2	-0.4865	0.0718097
ENSMUSG00000032595	Cdhr4	cadherin-related family member 4	-0.4863	0.89097
ENSMUSG00000040212	Emp3	epithelial membrane protein 3	0.4855	0.169525
ENSMUSG00000030172	Erc1	ELKS/RAB6-interacting/CAST family member 1	0.4853	0.655124
ENSMUSG00000023960	Enpp5	ectonucleotide pyrophosphatase/phosphodiesterase 5	-0.4852	0.663802
ENSMUSG00000038777	Sema6c	sema domain, transmembrane domain (TM), and cytopl...	-0.4852	0.605601
ENSMUSG00000063787	Chchd1	coiled-coil-helix-coiled-coil-helix domain contain...	0.4851	0.339406
ENSMUSG00000032718	Mansc1	MANSC domain containing 1	-0.485	1
ENSMUSG00000021000	Mia2	MIA SH3 domain ER export factor 2	-0.4847	0.0197705
ENSMUSG00000090171	Ugt1a2	UDP glucuronosyltransferase 1 family, polypeptide ...	-0.4844	0.0144652
ENSMUSG00000047746	Fbxo40	F-box protein 40	-0.4843	0.719229
ENSMUSG00000050578	Mmp13	matrix metallopeptidase 13	0.4841	0.850587
ENSMUSG00000027087	Itgav	integrin alpha V	-0.484	0.0702721
ENSMUSG00000044562	Rasip1	Ras interacting protein 1	0.484	0.819419
ENSMUSG00000103906	Tigd5	tigger transposable element derived 5	-0.484	0.727801
ENSMUSG00000014932	Yes1	YES proto-oncogene 1, Src family tyrosine kinase	-0.484	0.339406
ENSMUSG00000036825	Ssx2ip	SSX family member 2 interacting protein	-0.4837	0.7548
ENSMUSG00000031995	St14	suppression of tumorigenicity 14 (colon carcinoma)	-0.483	0.223002
ENSMUSG00000020892	Aloxe3	arachidonate lipoxygenase 3	-0.4826	0.943096
ENSMUSG00000066568	Lsm14a	LSM14A mRNA processing body assembly factor	-0.4824	0.310043
ENSMUSG00000073700	Klhl21	kelch-like 21	-0.4821	0.557226
ENSMUSG00000027313	Chac1	ChaC, cation transport regulator 1	0.4815	0.78533
ENSMUSG00000057322	Rpl38	ribosomal protein L38	0.4813	0.700589
ENSMUSG00000062040	Zfp27	zinc finger protein 27	-0.4812	0.530768
ENSMUSG00000028610	Dmrtb1	DMRT-like family B with proline-rich C-terminal, 1	0.4808	1
ENSMUSG00000029718	Pcolce	procollagen C-endopeptidase enhancer protein	0.4805	0.920055
ENSMUSG00000020089	Ppa1	pyrophosphatase (inorganic) 1	0.4805	0.151782
ENSMUSG00000009647	Mcu	mitochondrial calcium uniporter	-0.4804	0.646212
ENSMUSG00000020376	Rnf130	ring finger protein 130	-0.4802	0.502305
ENSMUSG00000004609	Cd33	CD33 molecule	-0.4801	0.0072458
ENSMUSG00000003970	Rpl8	ribosomal protein L8	0.4801	0.0002933
ENSMUSG00000036781	Rps27l	ribosomal protein S27-like	0.48	0.150085
ENSMUSG00000047867	Gimap6	GTPase, IMAP family member 6	-0.4798	0.0665162
ENSMUSG00000051499	Zfp786	zinc finger protein 786	0.4793	1
ENSMUSG00000090165	Ugt1a10	UDP glycosyltransferase 1 family, polypeptide A10	-0.4791	0.0150548
ENSMUSG00000089943	Ugt1a5	UDP glucuronosyltransferase 1 family, polypeptide ...	-0.4791	0.0150548
ENSMUSG00000059291	Rpl11	ribosomal protein L11	0.4791	0.107909
ENSMUSG00000034663	Bmp2k	BMP2 inducible kinase	-0.4789	0.0467772
ENSMUSG00000003228	Grk5	G protein-coupled receptor kinase 5	-0.4788	1
ENSMUSG00000090175	Ugt1a9	UDP glucuronosyltransferase 1 family, polypeptide ...	-0.4788	0.0150548
ENSMUSG00000089675	Ugt1a8	UDP glucuronosyltransferase 1 family, polypeptide ...	-0.4788	0.0150548
ENSMUSG00000034917	Tjp3	tight junction protein 3	0.4782	0.896765
ENSMUSG00000025104	Hdgfl3	HDGF like 3	-0.4782	0.223002
ENSMUSG00000045092	S1pr1	sphingosine-1-phosphate receptor 1	-0.478	0.0212271
ENSMUSG00000089960	Ugt1a1	UDP glucuronosyltransferase 1 family, polypeptide ...	-0.4779	0.0151672
ENSMUSG00000020087	Tysnd1	trypsin domain containing 1	-0.4777	0.673886
ENSMUSG00000074129	Rpl13a	ribosomal protein L13A	0.4774	0.004301
ENSMUSG00000020372	Rack1	receptor for activated C kinase 1	0.4771	0.0019186
ENSMUSG00000018500	Adora2b	adenosine A2b receptor	-0.4771	0.907134
ENSMUSG00000021066	Atl1	atlastin GTPase 1	-0.4771	0.858465
ENSMUSG00000024393	Prrc2a	proline-rich coiled-coil 2A	0.4769	0.580983
ENSMUSG00000090145	Ugt1a6b	UDP glucuronosyltransferase 1 family, polypeptide ...	-0.4767	0.0156616
ENSMUSG00000042734	Ttc9	tetratricopeptide repeat domain 9	-0.4766	0.788908
ENSMUSG00000037337	Map4k1	mitogen-activated protein kinase kinase kinase kin...	0.4766	0.805889
ENSMUSG00000000838	Fmr1	fragile X messenger ribonucleoprotein 1	-0.4761	0.329326
ENSMUSG00000029390	Tmed2	transmembrane p24 trafficking protein 2	-0.476	0.508887
ENSMUSG00000039089	L3mbtl3	L3MBTL3 histone methyl-lysine binding protein	0.4759	0.805889
ENSMUSG00000079362	Gm43302	predicted gene 43302	0.4759	0.840435
ENSMUSG00000046229	Scand1	SCAN domain-containing 1	-0.4758	0.709593
ENSMUSG00000075225	Ccdc162	coiled-coil domain containing 162	-0.4758	0.610651
ENSMUSG00000024072	Yipf4	Yip1 domain family, member 4	-0.4757	0.819419
ENSMUSG00000028677	Rnf220	ring finger protein 220	-0.4753	0.221726
ENSMUSG00000026365	Cfh	complement component factor h	-0.4751	0.0142466
ENSMUSG00000022091	Sorbs3	sorbin and SH3 domain containing 3	0.4751	0.819419
ENSMUSG00000055137	Sugct	succinyl-CoA glutarate-CoA transferase	-0.4749	0.759315
ENSMUSG00000030302	Atp2b2	ATPase, Ca++ transporting, plasma membrane 2	-0.4748	0.794596
ENSMUSG00000029458	Brap	BRCA1 associated protein	-0.4748	0.462497
ENSMUSG00000060938	Rpl26	ribosomal protein L26	0.4745	0.0377704
ENSMUSG00000032217	Rnf111	ring finger 111	-0.4745	0.175257
ENSMUSG00000092260	Zfp963	zinc finger protein 963	-0.4743	0.423949
ENSMUSG00000020057	Dram1	DNA-damage regulated autophagy modulator 1	0.4742	0.819419
ENSMUSG00000040033	Stat2	signal transducer and activator of transcription 2	0.4741	0.0401512
ENSMUSG00000024527	Afg3l2	AFG3-like AAA ATPase 2	-0.4741	0.298694
ENSMUSG00000028776	Tinagl1	tubulointerstitial nephritis antigen-like 1	-0.4735	0.607008
ENSMUSG00000041846	Ppp4r3a	protein phosphatase 4 regulatory subunit 3A	-0.4734	0.26486
ENSMUSG00000002908	Kcnn1	potassium intermediate/small conductance calcium-a...	0.4732	1
ENSMUSG00000028718	Stil	Scl/Tal1 interrupting locus	0.4729	1
ENSMUSG00000017692	Rhbdl3	rhomboid like 3	-0.4728	0.748334
ENSMUSG00000049470	Aff4	AF4/FMR2 family, member 4	-0.4727	0.240781
ENSMUSG00000020811	Wscd1	WSC domain containing 1	-0.4727	0.570891
ENSMUSG00000049517	Rps23	ribosomal protein S23	0.4727	0.07391
ENSMUSG00000096740	Lbhd1	LBH domain containing 1	0.4727	0.062649
ENSMUSG00000072623	Zfp9	zinc finger protein 9	0.4725	0.748334
ENSMUSG00000062101	Zfp119b	zinc finger protein 119b	-0.4721	0.466988
ENSMUSG00000074794	Arrdc3	arrestin domain containing 3	-0.472	0.0331292
ENSMUSG00000054545	Ugt1a6a	UDP glucuronosyltransferase 1 family, polypeptide ...	-0.4719	0.0150715
ENSMUSG00000018459	Slc13a3	solute carrier family 13 (sodium-dependent dicarbo...	0.4718	0.327063
ENSMUSG00000038623	Tm6sf1	transmembrane 6 superfamily member 1	-0.4718	0.364297
ENSMUSG00000039629	Strip2	striatin interacting protein 2	0.4718	1
ENSMUSG00000035678	Tnfsf9	tumor necrosis factor (ligand) superfamily, member...	0.4718	0.561563
ENSMUSG00000042410	Agps	alkylglycerone phosphate synthase	-0.4718	0.0661453
ENSMUSG00000048920	Fkrp	fukutin related protein	-0.4716	0.421537
ENSMUSG00000036986	Pml	promyelocytic leukemia	0.4715	0.151782
ENSMUSG00000035713	Usp35	ubiquitin specific peptidase 35	0.4711	0.232408
ENSMUSG00000048806	Ifnb1	interferon beta 1, fibroblast	0.4708	0.93334
ENSMUSG00000020253	Ppm1m	protein phosphatase 1M	-0.4708	0.30658
ENSMUSG00000026728	Vim	vimentin	0.4707	0.426776
ENSMUSG00000024011	Pi16	peptidase inhibitor 16	-0.4705	0.918418
ENSMUSG00000041695	Kcnj2	potassium inwardly-rectifying channel, subfamily J...	-0.4702	0.33411
ENSMUSG00000020532	Acaca	acetyl-Coenzyme A carboxylase alpha	0.4702	0.827295
ENSMUSG00000025044	Msr1	macrophage scavenger receptor 1	0.4701	0.354407
ENSMUSG00000027199	Gatm	glycine amidinotransferase (L-arginine:glycine ami...	0.47	0.0270557
ENSMUSG00000006333	Rps9	ribosomal protein S9	0.4699	0.0059633
ENSMUSG00000033880	Lgals3bp	lectin, galactoside-binding, soluble, 3 binding pr...	0.4698	0.0442388
ENSMUSG00000015656	Hspa8	heat shock protein 8	0.4696	0.0203424
ENSMUSG00000021676	Iqgap2	IQ motif containing GTPase activating protein 2	0.4693	0.819419
ENSMUSG00000029722	Agfg2	ArfGAP with FG repeats 2	0.4689	0.332643
ENSMUSG00000024208	Uqcc2	ubiquinol-cytochrome c reductase complex assembly ...	0.4688	0.372778
ENSMUSG00000032860	P2ry2	purinergic receptor P2Y, G-protein coupled 2	0.4688	0.679432
ENSMUSG00000037601	Nme1	NME/NM23 nucleoside diphosphate kinase 1	0.4683	0.0018644
ENSMUSG00000028495	Rps6	ribosomal protein S6	0.4683	0.0177657
ENSMUSG00000002100	Mybpc3	myosin binding protein C, cardiac	0.4682	0.860633
ENSMUSG00000061544	Zfp229	zinc finger protein 229	-0.4681	0.723585
ENSMUSG00000037577	Ephx3	epoxide hydrolase 3	-0.4679	0.964329
ENSMUSG00000046908	Ltb4r1	leukotriene B4 receptor 1	-0.4676	0.807233
ENSMUSG00000006307	Kmt2b	lysine (K)-specific methyltransferase 2B	0.4676	0.34191
ENSMUSG00000060002	Chpt1	choline phosphotransferase 1	-0.4672	0.727287
ENSMUSG00000021047	Nova1	NOVA alternative splicing regulator 1	-0.4672	0.809243
ENSMUSG00000068011	Mkrn2os	makorin, ring finger protein 2, opposite strand	-0.467	0.759315
ENSMUSG00000059401	Mamld1	mastermind-like domain containing 1	-0.4669	0.881011
ENSMUSG00000003865	Gys1	glycogen synthase 1, muscle	0.4664	0.607008
ENSMUSG00000026986	Hnmt	histamine N-methyltransferase	-0.4663	0.108347
ENSMUSG00000011382	Dhdh	dihydrodiol dehydrogenase	0.4663	0.718994
ENSMUSG00000025795	Rassf3	Ras association (RalGDS/AF-6) domain family member...	-0.4661	0.656232
ENSMUSG00000063564	Col23a1	collagen, type XXIII, alpha 1	-0.4661	0.759315
ENSMUSG00000000791	Il12rb1	interleukin 12 receptor, beta 1	-0.466	0.527747
ENSMUSG00000020048	Hsp90b1	heat shock protein 90, beta (Grp94), member 1	0.4658	0.0035954
ENSMUSG00000057863	Rpl36	ribosomal protein L36	0.4657	0.4427
ENSMUSG00000042498	Radx	RPA1 related single stranded DNA binding protein, ...	-0.4646	0.809243
ENSMUSG00000021476	Habp4	hyaluronic acid binding protein 4	-0.4643	0.69361
ENSMUSG00000041571	Selenow	selenoprotein W	0.4642	0.23149
ENSMUSG00000028152	Tspan5	tetraspanin 5	-0.4641	0.720647
ENSMUSG00000061751	Kalrn	kalirin, RhoGEF kinase	0.4639	0.727287
ENSMUSG00000030020	Prickle2	prickle planar cell polarity protein 2	-0.4638	0.93334
ENSMUSG00000032518	Rpsa	ribosomal protein SA	0.4638	0.0005606
ENSMUSG00000060639	H4c9	H4 clustered histone 9	-0.4637	0.734227
ENSMUSG00000043487	Acot6	acyl-CoA thioesterase 6	-0.4636	0.605601
ENSMUSG00000021200	Asb2	ankyrin repeat and SOCS box-containing 2	-0.4636	0.45985
ENSMUSG00000031210	Gpr165	G protein-coupled receptor 165	-0.4635	0.510918
ENSMUSG00000049436	Upk1b	uroplakin 1B	-0.4635	0.0997608
ENSMUSG00000048661	Lemd3	LEM domain containing 3	-0.4635	0.645326
ENSMUSG00000041120	Nbl1	NBL1, DAN family BMP antagonist	-0.4634	0.825125
ENSMUSG00000036894	Rap2b	RAP2B, member of RAS oncogene family	0.4634	0.647837
ENSMUSG00000057193	Slc44a2	solute carrier family 44, member 2	-0.4631	0.0017777
ENSMUSG00000041552	Ptchd1	patched domain containing 1	-0.463	0.718602
ENSMUSG00000030428	Ttyh1	tweety family member 1	0.4627	1
ENSMUSG00000038042	Ptpdc1	protein tyrosine phosphatase domain containing 1	-0.4627	0.843903
ENSMUSG00000028234	Rps20	ribosomal protein S20	0.4626	0.31382
ENSMUSG00000062190	Lancl2	LanC (bacterial lantibiotic synthetase component C...	0.4626	0.841157
ENSMUSG00000035295	Wdr38	WD repeat domain 38	0.4624	0.350265
ENSMUSG00000024905	Tesmin	testis expressed metallothionein like	-0.4624	0.746384
ENSMUSG00000022376	Adcy8	adenylate cyclase 8	-0.4622	0.887352
ENSMUSG00000024220	Zfp523	zinc finger protein 523	-0.462	0.266304
ENSMUSG00000049775	Tmsb4x	thymosin, beta 4, X chromosome	0.4619	0.0464343
ENSMUSG00000056531	Ccdc18	coiled-coil domain containing 18	0.4618	0.819419
ENSMUSG00000031494	Cd209a	CD209a antigen	-0.4618	0.807338
ENSMUSG00000034354	Mtmr3	myotubularin related protein 3	-0.4617	0.0878297
ENSMUSG00000062997	Rpl35	ribosomal protein L35	0.4616	0.280228
ENSMUSG00000010064	Slc38a3	solute carrier family 38, member 3	0.4615	0.748334
ENSMUSG00000039699	Batf2	basic leucine zipper transcription factor, ATF-lik...	0.4613	0.679885
ENSMUSG00000097129	4930507D05Rik	RIKEN cDNA 4930507D05 gene	0.4613	0.854157
ENSMUSG00000031530	Dusp4	dual specificity phosphatase 4	-0.4611	0.33444
ENSMUSG00000038072	Galnt11	polypeptide N-acetylgalactosaminyltransferase 11	-0.4611	0.339778
ENSMUSG00000095098	Ccdc85b	coiled-coil domain containing 85B	0.461	0.657945
ENSMUSG00000041570	Camsap2	calmodulin regulated spectrin-associated protein f...	-0.461	0.540952
ENSMUSG00000027636	Sla2	Src-like-adaptor 2	-0.4609	0.787544
ENSMUSG00000063234	Gpr84	G protein-coupled receptor 84	0.4608	0.0028179
ENSMUSG00000035640	Cbarp	calcium channel, voltage-dependent, beta subunit a...	0.4608	1
ENSMUSG00000051985	Igfn1	immunoglobulin-like and fibronectin type III domai...	0.4608	0.93334
ENSMUSG00000038267	Slc22a23	solute carrier family 22, member 23	-0.4607	0.746384
ENSMUSG00000024301	Kifc5b	kinesin family member C5B	-0.4607	1
ENSMUSG00000041992	Rapgef5	Rap guanine nucleotide exchange factor (GEF) 5	-0.4604	0.335009
ENSMUSG00000007613	Tgfbr1	transforming growth factor, beta receptor I	-0.4603	0.0039414
ENSMUSG00000062859	Tcp11	t-complex protein 11	-0.4603	0.850797
ENSMUSG00000050666	Vstm4	V-set and transmembrane domain containing 4	-0.4603	1
ENSMUSG00000028459	Cd72	CD72 antigen	0.4602	0.335834
ENSMUSG00000032350	Gclc	glutamate-cysteine ligase, catalytic subunit	-0.4599	0.432081
ENSMUSG00000015342	Xk	X-linked Kx blood group	-0.4598	0.850587
ENSMUSG00000021993	Mipep	mitochondrial intermediate peptidase	-0.4597	0.585068
ENSMUSG00000015850	Adamtsl4	ADAMTS-like 4	0.4596	0.864744
ENSMUSG00000026180	Cxcr2	C-X-C motif chemokine receptor 2	-0.4592	0.964329
ENSMUSG00000038991	Txndc5	thioredoxin domain containing 5	-0.4586	0.559029
ENSMUSG00000050299	Gm9843	predicted gene 9843	0.4585	0.669413
ENSMUSG00000044026	Slc35g1	solute carrier family 35, member G1	-0.4581	0.918262
ENSMUSG00000071669	Snx29	sorting nexin 29	-0.458	0.028063
ENSMUSG00000045064	Zc2hc1c	zinc finger, C2HC-type containing 1C	0.4577	0.611072
ENSMUSG00000044424	Gm9493	40S ribosomal protein S7 pseudogene	0.4576	0.799464
ENSMUSG00000020024	Cep83	centrosomal protein 83	0.4576	0.611072
ENSMUSG00000049401	Ogfr	opioid growth factor receptor	0.4574	0.0063858
ENSMUSG00000038530	Rgs4	regulator of G-protein signaling 4	0.4572	0.748334
ENSMUSG00000042444	Mindy2	MINDY lysine 48 deubiquitinase 2	-0.4571	0.232495
ENSMUSG00000062203	Gspt1	G1 to S phase transition 1	-0.4571	0.245989
ENSMUSG00000035283	Adrb1	adrenergic receptor, beta 1	-0.4568	0.973504
ENSMUSG00000022422	Dscc1	DNA replication and sister chromatid cohesion 1	0.4565	0.757831
ENSMUSG00000031562	Dctd	dCMP deaminase	0.4563	0.607008
ENSMUSG00000040952	Rps19	ribosomal protein S19	0.4563	0.0070591
ENSMUSG00000028862	Map3k6	mitogen-activated protein kinase kinase kinase 6	-0.4561	0.834324
ENSMUSG00000013155	Enkd1	enkurin domain containing 1	0.4557	0.76327
ENSMUSG00000019132	BC005537	cDNA sequence BC005537	0.4557	0.128756
ENSMUSG00000096010	H4c16	H4 histone 16	-0.4553	0.184324
ENSMUSG00000017446	C1qtnf1	C1q and tumor necrosis factor related protein 1	0.4553	0.93334
ENSMUSG00000038473	Nos1ap	nitric oxide synthase 1 (neuronal) adaptor protein	-0.4552	0.641214
ENSMUSG00000039760	Il22ra2	interleukin 22 receptor, alpha 2	-0.4552	1
ENSMUSG00000024953	Prdx5	peroxiredoxin 5	0.455	0.011725
ENSMUSG00000010406	Mrpl52	mitochondrial ribosomal protein L52	0.4549	0.425651
ENSMUSG00000079436	Kcnj13	potassium inwardly-rectifying channel, subfamily J...	0.4545	0.984179
ENSMUSG00000038352	Arl5c	ADP-ribosylation factor-like 5C	0.4544	0.156495
ENSMUSG00000046707	Csnk2a2	casein kinase 2, alpha prime polypeptide	0.4543	0.819419
ENSMUSG00000024286	Ccny	cyclin Y	-0.4543	0.683743
ENSMUSG00000017639	Rab11fip4	RAB11 family interacting protein 4 (class II)	-0.4543	1
ENSMUSG00000029385	Ccng2	cyclin G2	-0.4542	0.191024
ENSMUSG00000095567	Noc2l	NOC2 like nucleolar associated transcriptional rep...	-0.4542	0.357564
ENSMUSG00000026544	Dusp23	dual specificity phosphatase 23	0.4541	0.73099
ENSMUSG00000074519	Zfp971	zinc finger protein 971	-0.454	1
ENSMUSG00000038126	Mphosph9	M-phase phosphoprotein 9	0.4538	0.831253
ENSMUSG00000029283	Cdc7	cell division cycle 7	0.4536	0.574698
ENSMUSG00000059040	Eno1b	enolase 1B, retrotransposed	0.4535	0.273614
ENSMUSG00000030605	Mfge8	milk fat globule EGF and factor V/VIII domain cont...	-0.4535	0.177792
ENSMUSG00000054027	Nt5dc3	5'-nucleotidase domain containing 3	0.4534	1
ENSMUSG00000075553	Gm5464	predicted gene 5464	-0.4532	1
ENSMUSG00000021123	Rdh12	retinol dehydrogenase 12	-0.4532	0.903867
ENSMUSG00000040322	Slc25a24	solute carrier family 25 (mitochondrial carrier, p...	0.4532	1
ENSMUSG00000039157	Eeig1	estrogen-induced osteoclastogenesis regulator 1	-0.4532	0.709593
ENSMUSG00000028468	Rgp1	RAB6A GEF compex partner 1	0.4531	0.648055
ENSMUSG00000020954	Strn3	striatin, calmodulin binding protein 3	-0.453	0.329326
ENSMUSG00000025422	Agap2	ArfGAP with GTPase domain, ankyrin repeat and PH d...	-0.4529	0.84048
ENSMUSG00000020277	Pfkl	phosphofructokinase, liver, B-type	0.4525	0.0008323
ENSMUSG00000001663	Gstt1	glutathione S-transferase, theta 1	0.4525	0.93334
ENSMUSG00000036478	Btg1	BTG anti-proliferation factor 1	-0.4525	0.198006
ENSMUSG00000090394	4930523C07Rik	RIKEN cDNA 4930523C07 gene	0.4524	0.727287
ENSMUSG00000027246	Ell3	elongation factor RNA polymerase II-like 3	0.4516	1
ENSMUSG00000036067	Slc2a6	solute carrier family 2 (facilitated glucose trans...	0.4513	0.515426
ENSMUSG00000022534	Mefv	Mediterranean fever	0.4513	0.916177
ENSMUSG00000024909	Efemp2	epidermal growth factor-containing fibulin-like ex...	0.4512	0.221726
ENSMUSG00000027849	Syt6	synaptotagmin VI	0.4512	0.819419
ENSMUSG00000047388	Atmin	ATM interactor	-0.4511	0.141307
ENSMUSG00000052911	Lamb2	laminin, beta 2	-0.4511	0.463603
ENSMUSG00000043807	Ly6g5b	lymphocyte antigen 6 family member G5B	0.4509	0.932956
ENSMUSG00000020029	Nudt4	nudix hydrolase 4	-0.4508	0.575974
ENSMUSG00000028381	Ugcg	UDP-glucose ceramide glucosyltransferase	-0.4505	0.607008
ENSMUSG00000043535	Setx	senataxin	0.4505	0.63067
ENSMUSG00000020894	Vamp2	vesicle-associated membrane protein 2	-0.4504	0.198446
ENSMUSG00000019841	Rev3l	REV3 like, DNA directed polymerase zeta catalytic ...	-0.4503	0.678043
ENSMUSG00000029623	Pdap1	PDGFA associated protein 1	0.4502	0.611072
ENSMUSG00000006538	Ihh	Indian hedgehog	-0.45	0.93334
ENSMUSG00000072501	Phf20l1	PHD finger protein 20-like 1	-0.4499	0.257679
ENSMUSG00000012819	Cdh23	cadherin related 23 (otocadherin)	-0.4499	0.0829074
ENSMUSG00000014226	Cacybp	calcyclin binding protein	0.4498	0.184324
ENSMUSG00000020034	Tcp11l2	t-complex 11 (mouse) like 2	-0.4497	0.0319898
ENSMUSG00000004460	Dnajb11	DnaJ heat shock protein family (Hsp40) member B11	0.4496	0.0035376
ENSMUSG00000034538	Zfp418	zinc finger protein 418	-0.4496	0.692097
ENSMUSG00000020841	Cpd	carboxypeptidase D	0.4495	0.332643
ENSMUSG00000051650	B3gnt2	UDP-GlcNAc:betaGal beta-1,3-N-acetylglucosaminyltr...	-0.4493	0.343653
ENSMUSG00000006567	Atp7b	ATPase, Cu++ transporting, beta polypeptide	-0.4493	0.719731
ENSMUSG00000030342	Cd9	CD9 antigen	-0.4492	0.0074516
ENSMUSG00000000901	Mmp11	matrix metallopeptidase 11	-0.4492	0.820826
ENSMUSG00000019843	Fyn	Fyn proto-oncogene	-0.4492	0.76327
ENSMUSG00000073705	Cenps	centromere protein S	0.4491	0.851487
ENSMUSG00000000740	Rpl13	ribosomal protein L13	0.4488	0.0044683
ENSMUSG00000037563	Rps16	ribosomal protein S16	0.4485	0.235216
ENSMUSG00000072673	Gm10392	predicted gene 10392	-0.4484	0.702833
ENSMUSG00000057637	Prdm2	PR domain containing 2, with ZNF domain	0.4482	0.319291
ENSMUSG00000034652	Cd300a	CD300A molecule	-0.4482	0.0051903
ENSMUSG00000054967	Zfp647	zinc finger protein 647	-0.448	0.775267
ENSMUSG00000030007	Cct7	chaperonin containing TCP1 subunit 7	0.4475	0.0085181
ENSMUSG00000003429	Rps11	ribosomal protein S11	0.4474	0.0022617
ENSMUSG00000001095	Slc13a2	solute carrier family 13 (sodium-dependent dicarbo...	-0.4473	0.746384
ENSMUSG00000037253	Mex3c	mex3 RNA binding family member C	-0.4467	0.62635
ENSMUSG00000003949	Hlf	hepatic leukemia factor	-0.4466	1
ENSMUSG00000074743	Thbd	thrombomodulin	0.4464	1
ENSMUSG00000022686	B3gnt5	UDP-GlcNAc:betaGal beta-1,3-N-acetylglucosaminyltr...	-0.4463	0.746522
ENSMUSG00000027994	Mcub	mitochondrial calcium uniporter dominant negative ...	0.446	1
ENSMUSG00000033739	Fkbpl	FK506 binding protein-like	0.4457	0.819419
ENSMUSG00000074151	Nlrc5	NLR family, CARD domain containing 5	0.4457	0.514409
ENSMUSG00000029101	Rgs12	regulator of G-protein signaling 12	-0.4456	0.753405
ENSMUSG00000024135	Srbd1	S1 RNA binding domain 1	0.4456	0.532641
ENSMUSG00000030249	Abcc9	ATP-binding cassette, sub-family C member 9	-0.4455	0.746522
ENSMUSG00000024620	Pdgfrb	platelet derived growth factor receptor, beta poly...	-0.4453	0.746384
ENSMUSG00000031849	Comp	cartilage oligomeric matrix protein	0.445	0.549937
ENSMUSG00000019320	Noxo1	NADPH oxidase organizer 1	-0.445	0.64059
ENSMUSG00000028329	Xpa	xeroderma pigmentosum, complementation group A	-0.4449	0.553405
ENSMUSG00000024970	Spindoc	spindlin interactor and repressor of chromatin bin...	-0.4448	0.607008
ENSMUSG00000032867	Fbxw8	F-box and WD-40 domain protein 8	-0.4448	0.42219
ENSMUSG00000031239	Itm2a	integral membrane protein 2A	0.4444	0.93334
ENSMUSG00000032322	Pstpip1	proline-serine-threonine phosphatase-interacting p...	0.4441	0.490592
ENSMUSG00000078317	F8a	factor 8-associated gene A	-0.444	0.697486
ENSMUSG00000023055	Calcoco1	calcium binding and coiled coil domain 1	-0.4438	0.156495
ENSMUSG00000032715	Trib3	tribbles pseudokinase 3	0.4438	0.719731
ENSMUSG00000040043	Rbms2	RNA binding motif, single stranded interacting pro...	0.4438	0.510755
ENSMUSG00000068855	H2ac20	H2A clustered histone 20	-0.4437	1
ENSMUSG00000047379	B4gat1	beta-1,4-glucuronyltransferase 1	-0.4434	0.0050254
ENSMUSG00000025815	Dhtkd1	dehydrogenase E1 and transketolase domain containi...	-0.4433	0.856458
ENSMUSG00000032400	Zwilch	zwilch kinetochore protein	0.4433	1
ENSMUSG00000026893	Gca	grancalcin	-0.4433	0.77563
ENSMUSG00000018547	Pip4k2b	phosphatidylinositol-5-phosphate 4-kinase, type II...	0.4431	0.913482
ENSMUSG00000054065	Pkp3	plakophilin 3	0.4424	0.734537
ENSMUSG00000038535	Zfp280d	zinc finger protein 280D	-0.4423	0.318738
ENSMUSG00000021830	Txndc16	thioredoxin domain containing 16	-0.4422	0.0889078
ENSMUSG00000007721	Ccdc124	coiled-coil domain containing 124	0.4422	0.0313424
ENSMUSG00000071072	Ptges3	prostaglandin E synthase 3	0.442	0.183247
ENSMUSG00000029816	Gpnmb	glycoprotein (transmembrane) nmb	0.4419	1
ENSMUSG00000040824	Snrpd2	small nuclear ribonucleoprotein D2	0.4416	0.547428
ENSMUSG00000019777	Hdac2	histone deacetylase 2	-0.4415	0.771203
ENSMUSG00000040528	Milr1	mast cell immunoglobulin like receptor 1	0.4415	0.15144
ENSMUSG00000062683	Atp5mc2	ATP synthase membrane subunit c locus 2	0.441	0.557226
ENSMUSG00000035109	Shc4	SHC (Src homology 2 domain containing) family, mem...	0.441	0.644062
ENSMUSG00000041453	Rpl21	ribosomal protein L21	0.4409	0.0307714
ENSMUSG00000007892	Rplp1	ribosomal protein lateral stalk subunit P1	0.4408	0.129421
ENSMUSG00000024049	Myom1	myomesin 1	-0.4404	0.739877
ENSMUSG00000090124	Ugt1a7c	UDP glucuronosyltransferase 1 family, polypeptide ...	-0.4404	0.0197463
ENSMUSG00000095789	Nupr2	nuclear protein transcriptional regulator 2	-0.4403	1
ENSMUSG00000024608	Rps14	ribosomal protein S14	0.4402	0.0043546
ENSMUSG00000022452	Smdt1	single-pass membrane protein with aspartate rich t...	0.4401	0.0760576
ENSMUSG00000032320	Rcn2	reticulocalbin 2	-0.44	0.73855
ENSMUSG00000019851	Perp	PERP, TP53 apoptosis effector	-0.4395	0.943096
ENSMUSG00000008384	Sertad1	SERTA domain containing 1	0.4394	0.199416
ENSMUSG00000000384	Tbrg4	transforming growth factor beta regulated gene 4	0.4393	0.570891
ENSMUSG00000004552	Ctse	cathepsin E	-0.4391	0.76327
ENSMUSG00000042082	Arsb	arylsulfatase B	-0.4387	0.0484991
ENSMUSG00000030098	Grip2	glutamate receptor interacting protein 2	-0.4387	1
ENSMUSG00000021493	Pdlim7	PDZ and LIM domain 7	0.4386	0.81423
ENSMUSG00000037742	Eef1a1	eukaryotic translation elongation factor 1 alpha 1	0.4383	0.0008823
ENSMUSG00000041220	Elovl6	ELOVL fatty acid elongase 6	-0.4382	0.943096
ENSMUSG00000020525	Ppm1d	protein phosphatase 1D magnesium-dependent, delta ...	-0.4379	0.76123
ENSMUSG00000002250	Ppard	peroxisome proliferator activator receptor delta	0.4379	0.620422
ENSMUSG00000040945	Rcc2	regulator of chromosome condensation 2	0.4377	0.424006
ENSMUSG00000040035	Disp2	dispatched RND transporter family member 2	0.4376	0.93334
ENSMUSG00000034265	Zdhhc14	zinc finger, DHHC domain containing 14	-0.4375	0.731212
ENSMUSG00000040963	Asgr2	asialoglycoprotein receptor 2	0.4374	1
ENSMUSG00000048012	Zfp473	zinc finger protein 473	-0.4372	0.822751
ENSMUSG00000026627	Pacc1	proton activated chloride channel 1	-0.4367	0.0046084
ENSMUSG00000048216	Gpr85	G protein-coupled receptor 85	0.4365	0.93334
ENSMUSG00000020439	Smtn	smoothelin	0.4363	0.862362
ENSMUSG00000031016	Wee1	WEE 1 homolog 1 (S. pombe)	-0.4362	1
ENSMUSG00000058056	Palld	palladin, cytoskeletal associated protein	0.4361	1
ENSMUSG00000044117	Bmerb1	bMERB domain containing 1	-0.436	0.746384
ENSMUSG00000030189	Ybx3	Y box protein 3	0.436	1
ENSMUSG00000040734	Ppp1r13l	protein phosphatase 1, regulatory subunit 13 like	0.4357	1
ENSMUSG00000038517	Tbkbp1	TBK1 binding protein 1	0.4356	0.744459
ENSMUSG00000032278	Paqr5	progestin and adipoQ receptor family member V	0.4356	0.93334
ENSMUSG00000020097	Sgpl1	sphingosine phosphate lyase 1	-0.4356	0.0028717
ENSMUSG00000078812	Eif5a	eukaryotic translation initiation factor 5A	0.4355	0.0083757
ENSMUSG00000028245	Nsmaf	neutral sphingomyelinase (N-SMase) activation asso...	-0.4352	0.232495
ENSMUSG00000036057	Ptpn23	protein tyrosine phosphatase, non-receptor type 23	0.4351	0.562032
ENSMUSG00000023009	Nckap5l	NCK-associated protein 5-like	0.4349	0.09412
ENSMUSG00000020883	Fbxl20	F-box and leucine-rich repeat protein 20	-0.4348	0.388333
ENSMUSG00000040451	Sgms1	sphingomyelin synthase 1	-0.4347	0.13916
ENSMUSG00000053175	Bcl3	B cell leukemia/lymphoma 3	-0.4345	0.616557
ENSMUSG00000052137	Rbm12b2	RNA binding motif protein 12 B2	0.4344	0.759315
ENSMUSG00000059479	B3gnt8	UDP-GlcNAc:betaGal beta-1,3-N-acetylglucosaminyltr...	0.4343	0.973741
ENSMUSG00000038252	Ncapd2	non-SMC condensin I complex, subunit D2	0.4343	0.603124
ENSMUSG00000003617	Cp	ceruloplasmin	0.4341	0.318738
ENSMUSG00000056091	St3gal5	ST3 beta-galactoside alpha-2,3-sialyltransferase 5	-0.434	0.648127
ENSMUSG00000028799	Zfp362	zinc finger protein 362	-0.4338	0.732043
ENSMUSG00000024843	Chka	choline kinase alpha	-0.4336	0.318738
ENSMUSG00000025257	Ribc1	RIB43A domain with coiled-coils 1	0.4335	0.893316
ENSMUSG00000022498	Txndc11	thioredoxin domain containing 11	-0.4335	0.315387
ENSMUSG00000054612	Mgmt	O-6-methylguanine-DNA methyltransferase	0.4334	0.746522
ENSMUSG00000047215	Rpl9	ribosomal protein L9	0.4334	0.0405756
ENSMUSG00000078193	Rpl35rt	ribosomal protein L35, retrotransposed	0.4333	0.787112
ENSMUSG00000060962	Dmkn	dermokine	-0.4327	0.527747
ENSMUSG00000003541	Ier3	immediate early response 3	0.4326	0.150021
ENSMUSG00000030867	Plk1	polo like kinase 1	0.4323	1
ENSMUSG00000074064	Mlycd	malonyl-CoA decarboxylase	-0.4323	0.670138
ENSMUSG00000033152	Podxl2	podocalyxin-like 2	-0.4321	1
ENSMUSG00000034842	Art3	ADP-ribosyltransferase 3	0.432	1
ENSMUSG00000024966	Stip1	stress-induced phosphoprotein 1	0.4318	0.0587651
ENSMUSG00000021822	Plau	plasminogen activator, urokinase	-0.4317	0.930669
ENSMUSG00000057143	Trim12c	tripartite motif-containing 12C	0.4317	0.746074
ENSMUSG00000029209	Gnpda2	glucosamine-6-phosphate deaminase 2	-0.4316	0.135284
ENSMUSG00000037992	Rara	retinoic acid receptor, alpha	-0.4314	0.826241
ENSMUSG00000038370	Pcp4l1	Purkinje cell protein 4-like 1	0.4312	0.849083
ENSMUSG00000010721	Lmbr1	limb region 1	-0.4309	0.746384
ENSMUSG00000024299	Adamts10	ADAM metallopeptidase with thrombospondin type 1 m...	-0.4309	0.312449
ENSMUSG00000035572	Dcaf10	DDB1 and CUL4 associated factor 10	-0.4308	0.663116
ENSMUSG00000006435	Neurl1a	neuralized E3 ubiquitin protein ligase 1A	-0.4307	0.270981
ENSMUSG00000024309	Pfdn6	prefoldin subunit 6	0.4306	0.220286
ENSMUSG00000048458	Inka2	inka box actin regulator 2	0.4306	1
ENSMUSG00000057914	Cacnb2	calcium channel, voltage-dependent, beta 2 subunit	-0.4305	0.529062
ENSMUSG00000022191	Drosha	drosha, ribonuclease type III	0.4303	0.274908
ENSMUSG00000022123	Scel	sciellin	0.4302	1
ENSMUSG00000031609	Sap30	sin3 associated polypeptide	-0.4299	0.785744
ENSMUSG00000033429	Mcee	methylmalonyl CoA epimerase	0.4298	0.647633
ENSMUSG00000021690	Jmy	junction-mediating and regulatory protein	-0.4296	0.948857
ENSMUSG00000005949	Ctns	cystinosis, nephropathic	-0.4296	0.0136508
ENSMUSG00000040883	Tmem205	transmembrane protein 205	0.4294	0.819419
ENSMUSG00000044566	Cage1	cancer antigen 1	-0.4293	0.813108
ENSMUSG00000029254	Stap1	signal transducing adaptor family member 1	0.429	1
ENSMUSG00000041417	Pik3r1	phosphoinositide-3-kinase regulatory subunit 1	-0.429	0.0874435
ENSMUSG00000025480	Syce1	synaptonemal complex central element protein 1	-0.429	0.92142
ENSMUSG00000009687	Fxyd5	FXYD domain-containing ion transport regulator 5	0.4289	0.412409
ENSMUSG00000019889	Ptprk	protein tyrosine phosphatase receptor type K	0.4288	0.93334
ENSMUSG00000020486	Septin4	septin 4	-0.4287	0.777001
ENSMUSG00000033475	Tomm6	translocase of outer mitochondrial membrane 6	0.4286	0.268461
ENSMUSG00000028044	Cks1b	CDC28 protein kinase 1b	0.4283	0.669413
ENSMUSG00000028081	Rps3a1	ribosomal protein S3A1	0.4281	0.0161428
ENSMUSG00000053101	Gpr141	G protein-coupled receptor 141	0.4279	1
ENSMUSG00000021265	Slc25a29	solute carrier family 25 (mitochondrial carrier, p...	-0.4278	0.727287
ENSMUSG00000001666	Ddt	D-dopachrome tautomerase	0.4277	0.799499
ENSMUSG00000035179	Saxo4	stabilizer of axonemal microtubules 4	0.4277	0.93334
ENSMUSG00000033863	Klf9	Kruppel-like transcription factor 9	-0.4277	0.921988
ENSMUSG00000032913	Lrig2	leucine-rich repeats and immunoglobulin-like domai...	-0.4275	0.261811
ENSMUSG00000032308	Ulk3	unc-51-like kinase 3	-0.4273	0.0844965
ENSMUSG00000037260	Hgsnat	heparan-alpha-glucosaminide N-acetyltransferase	-0.4273	0.702782
ENSMUSG00000035202	Lars2	leucyl-tRNA synthetase, mitochondrial	0.4271	0.0019303
ENSMUSG00000037573	Tob1	transducer of ErbB-2.1	-0.4271	0.877077
ENSMUSG00000031885	Cbfb	core binding factor beta	-0.427	0.274219
ENSMUSG00000040296	Rigi	RNA sensor RIG-I	0.4269	0.218089
ENSMUSG00000026028	Trak2	trafficking protein, kinesin binding 2	0.4268	0.618034
ENSMUSG00000045004	Spata21	spermatogenesis associated 21	-0.4267	0.605601
ENSMUSG00000079444	Gm21981	predicted gene 21981	0.4266	0.283682
ENSMUSG00000045826	Ptprcap	protein tyrosine phosphatase receptor type C polyp...	0.4262	1
ENSMUSG00000022199	Slc22a17	solute carrier family 22 (organic cation transport...	-0.4261	0.393486
ENSMUSG00000050493	Fam167b	family with sequence similarity 167, member B	0.4258	0.409118
ENSMUSG00000001056	Nhp2	NHP2 ribonucleoprotein	0.4258	0.0499531
ENSMUSG00000026192	Atic	5-aminoimidazole-4-carboxamide ribonucleotide form...	0.4258	0.5026
ENSMUSG00000092544	Gm20422	predicted gene 20422	-0.4257	0.574698
ENSMUSG00000043252	Tmem64	transmembrane protein 64	-0.4254	0.533609
ENSMUSG00000022426	Josd1	Josephin domain containing 1	-0.4254	0.542223
ENSMUSG00000033904	Ccp110	centriolar coiled coil protein 110	-0.4252	0.703244
ENSMUSG00000050148	Ubqln2	ubiquilin 2	-0.4251	0.840401
ENSMUSG00000072774	Zfp951	zinc finger protein 951	-0.4249	0.477666
ENSMUSG00000013562	4833413E03Rik	RIKEN cDNA 4833413E03 gene	0.4247	1
ENSMUSG00000057596	Trim30d	tripartite motif-containing 30D	0.4245	0.252595
ENSMUSG00000028496	Mllt3	myeloid/lymphoid or mixed-lineage leukemia; transl...	0.4243	0.945284
ENSMUSG00000038351	Sgsm2	small G protein signaling modulator 2	-0.4242	0.76327
ENSMUSG00000003873	Bax	BCL2-associated X protein	0.4242	0.0137706
ENSMUSG00000004668	Abca13	ATP-binding cassette, sub-family A member 13	-0.4239	0.845319
ENSMUSG00000038539	Atf5	activating transcription factor 5	0.4238	0.820615
ENSMUSG00000051427	Ccdc157	coiled-coil domain containing 157	-0.4238	0.62635
ENSMUSG00000073422	Hsd17b8	hydroxysteroid 17-beta dehydrogenase 8	-0.4236	0.819419
ENSMUSG00000022602	Arc	activity regulated cytoskeletal-associated protein	0.4235	0.902355
ENSMUSG00000020212	Mdm1	MDM1 nuclear protein	0.4235	0.754528
ENSMUSG00000060579	Fhit	fragile histidine triad gene	-0.423	0.819419
ENSMUSG00000034422	Parp14	poly (ADP-ribose) polymerase family, member 14	0.4228	0.553405
ENSMUSG00000031906	Smpd3	sphingomyelin phosphodiesterase 3, neutral	0.4226	0.999243
ENSMUSG00000001473	Tubb6	tubulin, beta 6 class V	0.4226	0.101136
ENSMUSG00000020014	Cfap54	cilia and flagella associated protein 54	0.4224	0.93334
ENSMUSG00000050822	Slc29a4	solute carrier family 29 (nucleoside transporters)...	0.4224	0.748334
ENSMUSG00000004798	Ulk2	unc-51 like kinase 2	-0.422	0.135284
ENSMUSG00000023345	Poc1a	POC1 centriolar protein A	0.422	0.753405
ENSMUSG00000069270	H2ac6	H2A clustered histone 6	-0.422	1
ENSMUSG00000059070	Rpl18	ribosomal protein L18	0.4219	0.0050254
ENSMUSG00000031482	Slc25a15	solute carrier family 25 (mitochondrial carrier or...	0.4218	0.571115
ENSMUSG00000050107	Haspin	histone H3 associated protein kinase	0.4216	0.665609
ENSMUSG00000019970	Sgk1	serum/glucocorticoid regulated kinase 1	-0.4215	0.0803682
ENSMUSG00000043336	Filip1l	filamin A interacting protein 1-like	-0.4214	0.633265
ENSMUSG00000035355	Kcnh4	potassium voltage-gated channel, subfamily H (eag-...	-0.4213	1
ENSMUSG00000022283	Pabpc1	poly(A) binding protein, cytoplasmic 1	0.421	0.0030884
ENSMUSG00000027463	Slc52a3	solute carrier protein family 52, member 3	-0.4208	0.93334
ENSMUSG00000044229	Nxpe4	neurexophilin and PC-esterase domain family, membe...	0.4206	1
ENSMUSG00000012405	Rpl15	ribosomal protein L15	0.4206	0.101699
ENSMUSG00000028443	Nudt2	nudix hydrolase 2	0.4202	0.799499
ENSMUSG00000001053	N4bp3	NEDD4 binding protein 3	0.4202	0.902237
ENSMUSG00000042699	Dhx9	DExH-box helicase 9	-0.4199	0.622859
ENSMUSG00000102252	Snrpn	small nuclear ribonucleoprotein N	-0.4198	1
ENSMUSG00000049960	Mrps16	mitochondrial ribosomal protein S16	0.4197	0.378966
ENSMUSG00000031517	Gpm6a	glycoprotein m6a	0.4196	0.76327
ENSMUSG00000062794	Zfp599	zinc finger protein 599	0.4195	1
ENSMUSG00000070691	Runx3	runt related transcription factor 3	0.4194	1
ENSMUSG00000056201	Cfl1	cofilin 1, non-muscle	0.4193	0.0014381
ENSMUSG00000032238	Rora	RAR-related orphan receptor alpha	-0.4192	0.826241
ENSMUSG00000022148	Fyb1	FYN binding protein 1	0.419	0.0135301
ENSMUSG00000036782	Klhl13	kelch-like 13	-0.4188	0.825125
ENSMUSG00000041203	Trir	telomerase RNA component interacting RNase	0.4186	0.110414
ENSMUSG00000044533	Rps2	ribosomal protein S2	0.4183	0.0007216
ENSMUSG00000094638	Gm21972	predicted gene 21972	0.4182	0.803145
ENSMUSG00000035868	Zfp983	zinc finger protein 983	-0.4182	0.574722
ENSMUSG00000002580	Mien1	migration and invasion enhancer 1	0.4181	0.151782
ENSMUSG00000092305	Prps1l1	phosphoribosyl pyrophosphate synthetase 1-like 1	0.418	0.945284
ENSMUSG00000012848	Rps5	ribosomal protein S5	0.418	0.0094017
ENSMUSG00000037788	Vopp1	vesicular, overexpressed in cancer, prosurvival pr...	-0.4179	0.93334
ENSMUSG00000024750	Zfand5	zinc finger, AN1-type domain 5	-0.4179	0.232495
ENSMUSG00000049760	Micos13	mitochondrial contact site and cristae organizing ...	0.4178	0.295411
ENSMUSG00000030505	Prmt3	protein arginine N-methyltransferase 3	-0.4177	0.507623
ENSMUSG00000063316	Rpl27	ribosomal protein L27	0.4175	0.318738
ENSMUSG00000028137	Celf3	CUGBP, Elav-like family member 3	-0.4175	0.850587
ENSMUSG00000002365	Snx9	sorting nexin 9	-0.4174	0.576061
ENSMUSG00000050721	Plekho2	pleckstrin homology domain containing, family O me...	0.4171	0.0045511
ENSMUSG00000043633	Fam221b	family with sequence similarity 221, member B	0.4169	0.845594
ENSMUSG00000016487	Ppfibp1	PTPRF interacting protein, binding protein 1 (lipr...	-0.4169	0.717929
ENSMUSG00000032002	Dcun1d5	defective in cullin neddylation 1 domain containin...	-0.4169	0.819419
ENSMUSG00000025759	Mfsd8	major facilitator superfamily domain containing 8	-0.4168	0.404108
ENSMUSG00000031320	Rps4x	ribosomal protein S4, X-linked	0.4166	0.0147694
ENSMUSG00000049940	Pgrmc2	progesterone receptor membrane component 2	-0.4165	0.62635
ENSMUSG00000033762	Recql4	RecQ protein-like 4	0.4165	0.932956
ENSMUSG00000079435	Rpl36a	ribosomal protein L36A	0.4164	0.748334
ENSMUSG00000023755	Rhebl1	Ras homolog enriched in brain like 1	-0.4164	0.891858
ENSMUSG00000009575	Cbx5	chromobox 5	0.4163	0.480733
ENSMUSG00000093938	Evi2b	ecotropic viral integration site 2b	0.4162	0.276304
ENSMUSG00000024472	Dcp2	decapping mRNA 2	0.4162	0.799499
ENSMUSG00000020604	Arsg	arylsulfatase G	-0.4161	0.138062
ENSMUSG00000050526	Mgat4f	MGAT4 family, member F	0.4161	0.539089
ENSMUSG00000005824	Tnfsf14	tumor necrosis factor (ligand) superfamily, member...	-0.4161	1
ENSMUSG00000056749	Nfil3	nuclear factor, interleukin 3, regulated	-0.416	0.739088
ENSMUSG00000030725	Lipt2	lipoyl(octanoyl) transferase 2 (putative)	-0.4158	0.978979
ENSMUSG00000030256	Bhlhe41	basic helix-loop-helix family, member e41	-0.4152	0.0878297
ENSMUSG00000010830	Kdelr3	KDEL (Lys-Asp-Glu-Leu) endoplasmic reticulum prote...	-0.4151	0.919115
ENSMUSG00000007836	Hnrnpa0	heterogeneous nuclear ribonucleoprotein A0	0.4149	0.819419
ENSMUSG00000004631	Sgce	sarcoglycan, epsilon	-0.4148	0.0047614
ENSMUSG00000048732	Klhl11	kelch-like 11	-0.4147	0.879298
ENSMUSG00000031803	B3gnt3	UDP-GlcNAc:betaGal beta-1,3-N-acetylglucosaminyltr...	-0.4145	1
ENSMUSG00000089844	Sp140l1	Sp140 nuclear body protein like 1	0.4139	0.93334
ENSMUSG00000062901	Klhl24	kelch-like 24	-0.4139	0.227104
ENSMUSG00000027863	Cd2	CD2 antigen	0.4138	0.748334
ENSMUSG00000024665	Fads2	fatty acid desaturase 2	0.4137	0.76327
ENSMUSG00000072663	Spef2	sperm flagellar 2	-0.4136	0.727287
ENSMUSG00000020988	L2hgdh	L-2-hydroxyglutarate dehydrogenase	-0.4136	0.697486
ENSMUSG00000025730	Rab40c	Rab40C, member RAS oncogene family	-0.4133	0.251325
ENSMUSG00000026764	Kif5c	kinesin family member 5C	-0.4133	0.93334
ENSMUSG00000072915	Gm12258	predicted gene 12258	-0.4133	0.809603
ENSMUSG00000047676	Rpsa-ps10	ribosomal protein SA, pseudogene 10	0.4132	0.771203
ENSMUSG00000020859	Spag9	sperm associated antigen 9	-0.4132	0.219106
ENSMUSG00000046798	Cldn12	claudin 12	-0.4131	0.744459
ENSMUSG00000031392	Irak1	interleukin-1 receptor-associated kinase 1	-0.4129	0.391502
ENSMUSG00000002897	Il17ra	interleukin 17 receptor A	-0.4126	0.586552
ENSMUSG00000037295	Ldlrap1	low density lipoprotein receptor adaptor protein 1	0.4124	0.210912
ENSMUSG00000055839	Elob	elongin B	0.4124	0.339778
ENSMUSG00000066595	Flvcr1	feline leukemia virus subgroup C cellular receptor...	-0.4123	0.657945
ENSMUSG00000073563	Csnk1g3	casein kinase 1, gamma 3	-0.4123	0.849289
ENSMUSG00000028334	Nans	N-acetylneuraminic acid synthase (sialic acid synt...	0.4123	0.0713145
ENSMUSG00000035509	Fbxl21	F-box and leucine-rich repeat protein 21	0.4121	1
ENSMUSG00000024213	Nudt3	nudix hydrolase 3	-0.4121	0.403762
ENSMUSG00000040818	Dennd6a	DENN domain containing 6A	-0.412	0.188717
ENSMUSG00000024597	Slc12a2	solute carrier family 12, member 2	-0.4119	0.514434
ENSMUSG00000025176	Hoga1	4-hydroxy-2-oxoglutarate aldolase 1	-0.4117	1
ENSMUSG00000020640	Itsn2	intersectin 2	-0.4116	0.302309
ENSMUSG00000090137	Uba52	ubiquitin A-52 residue ribosomal protein fusion pr...	0.4115	0.299369
ENSMUSG00000068923	Syt11	synaptotagmin XI	-0.4115	0.138062
ENSMUSG00000025993	Slc40a1	solute carrier family 40 (iron-regulated transport...	-0.4111	0.0295883
ENSMUSG00000048878	Hexim1	hexamethylene bis-acetamide inducible 1	0.4109	0.606928
ENSMUSG00000038005	Hpf1	histone PARylation factor 1	0.4108	0.31382
ENSMUSG00000030592	Ryr1	ryanodine receptor 1, skeletal muscle	-0.4107	0.93334
ENSMUSG00000071415	Rpl23	ribosomal protein L23	0.4104	0.311534
ENSMUSG00000003233	Dvl3	dishevelled segment polarity protein 3	-0.4103	0.675053
ENSMUSG00000047030	Spata2	spermatogenesis associated 2	-0.4102	0.143986
ENSMUSG00000057113	Npm1	nucleophosmin 1	0.4101	0.0112272
ENSMUSG00000028291	Akirin2	akirin 2	-0.4101	0.69361
ENSMUSG00000000303	Cdh1	cadherin 1	-0.4101	0.93334
ENSMUSG00000099032	Tcf24	transcription factor 24	-0.4098	0.93334
ENSMUSG00000040415	Dtx3	deltex 3, E3 ubiquitin ligase	-0.4097	0.0599769
ENSMUSG00000024283	Wac	WW domain containing adaptor with coiled-coil	-0.4097	0.13915
ENSMUSG00000042797	Aqp11	aquaporin 11	-0.4096	0.746384
ENSMUSG00000030041	M1ap	meiosis 1 associated protein	0.4095	0.899817
ENSMUSG00000009248	Ascl2	achaete-scute family bHLH transcription factor 2	0.4095	0.841856
ENSMUSG00000029054	Gabrd	gamma-aminobutyric acid (GABA) A receptor, subunit...	0.4094	0.932956
ENSMUSG00000022092	Ppp3cc	protein phosphatase 3, catalytic subunit, gamma is...	-0.409	1
ENSMUSG00000039068	Zzz3	zinc finger, ZZ domain containing 3	-0.4088	0.222177
ENSMUSG00000037921	Ddx60	DExD/H box helicase 60	0.4083	0.778543
ENSMUSG00000056851	Pcbp2	poly(rC) binding protein 2	0.4083	0.110466
ENSMUSG00000041132	N4bp2l1	NEDD4 binding protein 2-like 1	-0.4081	0.0715862
ENSMUSG00000043592	Unc5cl	unc-5 family C-terminal like	-0.4081	1
ENSMUSG00000056216	Cebpg	CCAAT/enhancer binding protein gamma	-0.4081	0.327063
ENSMUSG00000034880	Mrpl34	mitochondrial ribosomal protein L34	0.4079	0.58259
ENSMUSG00000062115	Rai1	retinoic acid induced 1	0.4078	0.653322
ENSMUSG00000017716	Birc5	baculoviral IAP repeat-containing 5	0.4078	1
ENSMUSG00000027238	Frmd5	FERM domain containing 5	-0.4076	0.964329
ENSMUSG00000033998	Kcnk1	potassium channel, subfamily K, member 1	0.4076	0.93334
ENSMUSG00000035232	Pdk3	pyruvate dehydrogenase kinase, isoenzyme 3	0.4075	0.309525
ENSMUSG00000053317	Sec61b	SEC61 translocon subunit beta	0.4075	0.317037
ENSMUSG00000058833	Rex1bd	required for excision 1-B domain containing	0.4074	0.322204
ENSMUSG00000019873	Reep3	receptor accessory protein 3	-0.4074	0.0768019
ENSMUSG00000062444	Ap3b2	adaptor-related protein complex 3, beta 2 subunit	0.4074	0.93334
ENSMUSG00000073096	Lrrc61	leucine rich repeat containing 61	-0.4074	0.33411
ENSMUSG00000022885	St6gal1	beta galactoside alpha 2,6 sialyltransferase 1	-0.4071	0.101699
ENSMUSG00000087408	Gdf1	growth differentiation factor 1	-0.407	1
ENSMUSG00000074361	C5ar2	complement component 5a receptor 2	-0.407	0.108347
ENSMUSG00000041143	Tmco4	transmembrane and coiled-coil domains 4	-0.4069	0.444657
ENSMUSG00000028542	Slc6a9	solute carrier family 6 (neurotransmitter transpor...	-0.4069	0.879432
ENSMUSG00000011158	Brf1	BRF1, RNA polymerase III transcription initiation ...	-0.4068	0.527747
ENSMUSG00000029319	Coq2	coenzyme Q2 4-hydroxybenzoate polyprenyltransferas...	-0.4067	0.585068
ENSMUSG00000037664	Cdkn1c	cyclin dependent kinase inhibitor 1C	-0.4065	0.841856
ENSMUSG00000003153	Slc2a3	solute carrier family 2 (facilitated glucose trans...	-0.4065	0.332643
ENSMUSG00000026162	Nhej1	non-homologous end joining factor 1	-0.4065	0.888387
ENSMUSG00000031246	Sh3bgrl	SH3-binding domain glutamic acid-rich protein like	0.4063	0.619866
ENSMUSG00000030089	Slc41a3	solute carrier family 41, member 3	-0.4063	0.344002
ENSMUSG00000059288	Cdyl	chromodomain protein, Y chromosome-like	-0.4062	0.891858
ENSMUSG00000078768	Zfp566	zinc finger protein 566	-0.4062	0.618034
ENSMUSG00000025001	Hells	helicase, lymphoid specific	0.406	1
ENSMUSG00000022508	Bcl6	B cell leukemia/lymphoma 6	0.4059	0.394094
ENSMUSG00000026073	Il1r2	interleukin 1 receptor, type II	-0.4058	0.816459
ENSMUSG00000033099	Nol12	nucleolar protein 12	0.4056	0.216011
ENSMUSG00000051339	2900026A02Rik	RIKEN cDNA 2900026A02 gene	-0.4054	0.77563
ENSMUSG00000027381	Bcl2l11	BCL2 like 11	-0.4053	0.29199
ENSMUSG00000037681	Esyt3	extended synaptotagmin-like protein 3	-0.4052	0.746522
ENSMUSG00000025573	6030468B19Rik	RIKEN cDNA 6030468B19 gene	-0.4049	0.778671
ENSMUSG00000050668	Gpatch11	G patch domain containing 11	0.4049	0.507623
ENSMUSG00000027399	Il1a	interleukin 1 alpha	0.4045	0.133134
ENSMUSG00000015659	Serac1	serine active site containing 1	-0.4042	0.718161
ENSMUSG00000049676	Catsperg1	cation channel sperm associated auxiliary subunit ...	-0.4041	0.826241
ENSMUSG00000035234	Abraxas1	BRCA1 A complex subunit	-0.4039	0.49252
ENSMUSG00000036620	Mgat4b	mannoside acetylglucosaminyltransferase 4, isoenzy...	-0.4037	0.384292
ENSMUSG00000039239	Tgfb2	transforming growth factor, beta 2	0.4037	0.93334
ENSMUSG00000038437	Mllt6	myeloid/lymphoid or mixed-lineage leukemia; transl...	0.4037	0.86816
ENSMUSG00000025213	Kazald1	Kazal-type serine peptidase inhibitor domain 1	-0.4035	0.759315
ENSMUSG00000029832	Nfe2l3	nuclear factor, erythroid derived 2, like 3	-0.4034	0.746384
ENSMUSG00000030539	Sema4b	sema domain, immunoglobulin domain (Ig), transmemb...	-0.403	0.80243
ENSMUSG00000028943	Espn	espin	-0.4027	1
ENSMUSG00000029291	Rufy3	RUN and FYVE domain containing 3	-0.4027	0.851487
ENSMUSG00000038094	Atp13a4	ATPase type 13A4	0.4023	0.93334
ENSMUSG00000030283	St8sia1	ST8 alpha-N-acetyl-neuraminide alpha-2,8-sialyltra...	-0.4022	1
ENSMUSG00000026646	Suv39h2	suppressor of variegation 3-9 2	-0.402	0.918262
ENSMUSG00000024844	Banf1	BAF nuclear assembly factor 1	0.402	0.0704286
ENSMUSG00000027843	Ptpn22	protein tyrosine phosphatase, non-receptor type 22...	-0.402	0.882369
ENSMUSG00000079507	H2-Q1	histocompatibility 2, Q region locus 1	0.4019	0.975645
ENSMUSG00000048154	Kmt2d	lysine (K)-specific methyltransferase 2D	0.4018	0.283919
ENSMUSG00000018481	Appbp2	amyloid beta precursor protein binding protein 2	-0.4018	0.100733
ENSMUSG00000048503	Tlcd5	TLC domain containing 5	-0.4017	1
ENSMUSG00000028785	Hpca	hippocalcin	-0.4017	0.526066
ENSMUSG00000023883	Phf10	PHD finger protein 10	-0.4014	0.447165
ENSMUSG00000020715	Ern1	endoplasmic reticulum to nucleus signalling 1	-0.4013	0.728658
ENSMUSG00000050708	Ftl1	ferritin light polypeptide 1	0.4011	0.0107533
ENSMUSG00000019810	Fuca2	fucosidase, alpha-L- 2, plasma	-0.401	0.006416
ENSMUSG00000040229	Gpr34	G protein-coupled receptor 34	-0.4009	0.0249679
ENSMUSG00000025034	Trim8	tripartite motif-containing 8	-0.4009	0.141824
ENSMUSG00000023348	Trip6	thyroid hormone receptor interactor 6	0.4009	0.541194
ENSMUSG00000047759	Hs3st3a1	heparan sulfate (glucosamine) 3-O-sulfotransferase...	-0.4009	0.93334
ENSMUSG00000025586	Cpeb1	cytoplasmic polyadenylation element binding protei...	0.4008	1
ENSMUSG00000015214	Mtmr1	myotubularin related protein 1	-0.4007	0.619866
ENSMUSG00000022014	Epsti1	epithelial stromal interaction 1	0.4006	0.414197
ENSMUSG00000049950	Rpp38	ribonuclease P/MRP 38 subunit	0.4003	0.548168
ENSMUSG00000030134	Rasgef1a	RasGEF domain family, member 1A	-0.4	0.93334
ENSMUSG00000063362	Alg11	ALG11 alpha-1,2-mannosyltransferase	-0.3998	0.312476
ENSMUSG00000037995	Igsf9	immunoglobulin superfamily, member 9	0.3997	0.804499
ENSMUSG00000042678	Myo15a	myosin XVA	-0.3997	0.918262
ENSMUSG00000020335	Zfp354b	zinc finger protein 354B	0.3996	0.989612
ENSMUSG00000021281	Tnfaip2	tumor necrosis factor, alpha-induced protein 2	-0.3994	0.549944
ENSMUSG00000028029	Aimp1	aminoacyl tRNA synthetase complex-interacting mult...	0.3994	0.447234
ENSMUSG00000030704	Rab6a	RAB6A, member RAS oncogene family	-0.3994	0.71832
ENSMUSG00000034947	Tmem106a	transmembrane protein 106A	0.3994	0.0131811
ENSMUSG00000057789	Bak1	BCL2-antagonist/killer 1	0.3994	1
ENSMUSG00000022758	P2rx6	purinergic receptor P2X, ligand-gated ion channel,...	-0.3993	0.97495
ENSMUSG00000020022	Ndufa12	NADH:ubiquinone oxidoreductase subunit A12	0.3992	0.266466
ENSMUSG00000026219	Trip12	thyroid hormone receptor interactor 12	0.3992	0.109391
ENSMUSG00000031390	Avpr2	arginine vasopressin receptor 2	0.3987	0.139639
ENSMUSG00000038342	Mlxip	MLX interacting protein	-0.3984	0.511204
ENSMUSG00000030770	Parva	parvin, alpha	0.3983	0.93334
ENSMUSG00000098387	Pet117	PET117 homolog	-0.3982	0.886824
ENSMUSG00000018548	Trim37	tripartite motif-containing 37	-0.3981	0.553876
ENSMUSG00000032207	Lipc	lipase, hepatic	-0.398	0.850587
ENSMUSG00000028609	Magoh	mago homolog, exon junction complex core component	0.398	0.603124
ENSMUSG00000024118	Tedc2	tubulin epsilon and delta complex 2	0.398	0.811348
ENSMUSG00000091537	Tma7	translational machinery associated 7	0.3979	0.398788
ENSMUSG00000031078	Cttn	cortactin	0.3979	0.617027
ENSMUSG00000021342	Prl	prolactin	0.3978	0.964329
ENSMUSG00000044982	Sft2d3	SFT2 domain containing 3	-0.3976	1
ENSMUSG00000024486	Hbegf	heparin-binding EGF-like growth factor	-0.3976	1
ENSMUSG00000039824	Myl6b	myosin, light polypeptide 6B	-0.3976	1
ENSMUSG00000000686	Abhd15	abhydrolase domain containing 15	-0.3974	0.782794
ENSMUSG00000016756	Cmah	cytidine monophospho-N-acetylneuraminic acid hydro...	0.3973	1
ENSMUSG00000022099	Dmtn	dematin actin binding protein	-0.3972	0.748334
ENSMUSG00000036777	Anln	anillin, actin binding protein	-0.3971	1
ENSMUSG00000044548	Dact1	dishevelled-binding antagonist of beta-catenin 1	-0.397	0.746384
ENSMUSG00000006715	Gmnn	geminin	0.397	0.74905
ENSMUSG00000026604	Ptpn14	protein tyrosine phosphatase, non-receptor type 14	0.397	0.736512
ENSMUSG00000022756	Slc7a4	solute carrier family 7 (cationic amino acid trans...	-0.3969	0.855702
ENSMUSG00000024887	Asah2	N-acylsphingosine amidohydrolase 2	0.3969	1
ENSMUSG00000047766	Lrrc49	leucine rich repeat containing 49	-0.3968	0.918453
ENSMUSG00000040957	Cables1	CDK5 and Abl enzyme substrate 1	-0.3967	0.510918
ENSMUSG00000034871	Fam151a	family with sequence simliarity 151, member A	-0.3966	1
ENSMUSG00000036086	Zranb3	zinc finger, RAN-binding domain containing 3	0.3966	0.825125
ENSMUSG00000058886	Deaf1	DEAF1, transcription factor	-0.3965	0.547428
ENSMUSG00000028950	Tas1r1	taste receptor, type 1, member 1	0.3965	0.748334
ENSMUSG00000063458	Lrmda	leucine rich melanocyte differentiation associated	0.3964	0.709593
ENSMUSG00000016526	Dyrk3	dual-specificity tyrosine phosphorylation regulate...	-0.3963	0.746522
ENSMUSG00000024371	C2	complement C2	0.3961	0.819419
ENSMUSG00000071516	H2ac13	H2A clustered histone 13	-0.3961	0.746384
ENSMUSG00000045094	Arhgef37	Rho guanine nucleotide exchange factor 37	0.3961	0.93334
ENSMUSG00000078651	Aoc2	amine oxidase copper containing 2	0.3961	1
ENSMUSG00000025558	Dock9	dedicator of cytokinesis 9	-0.3961	0.554354
ENSMUSG00000035105	Egln3	egl-9 family hypoxia-inducible factor 3	0.3961	0.973741
ENSMUSG00000031529	Tnks	tankyrase, TRF1-interacting ankyrin-related ADP-ri...	-0.396	0.767761
ENSMUSG00000029439	Sfswap	splicing factor SWAP	0.3959	0.292406
ENSMUSG00000005681	Apoa2	apolipoprotein A-II	0.3957	0.611072
ENSMUSG00000068245	Phf11d	PHD finger protein 11D	0.3956	0.261874
ENSMUSG00000046364	Rpl27a	ribosomal protein L27A	0.3956	0.520064
ENSMUSG00000032399	Rpl4	ribosomal protein L4	0.3955	0.0022197
ENSMUSG00000031381	Piga	phosphatidylinositol glycan anchor biosynthesis, c...	0.3955	0.76327
ENSMUSG00000071478	H2ac7	H2A clustered histone 7	-0.3955	0.444657
ENSMUSG00000004567	Mcoln1	mucolipin 1	-0.3954	0.684055
ENSMUSG00000008153	Clstn3	calsyntenin 3	-0.3954	0.964329
ENSMUSG00000038807	Rap1gap2	RAP1 GTPase activating protein 2	-0.3952	0.674571
ENSMUSG00000017550	Atad5	ATPase family, AAA domain containing 5	0.3952	0.674571
ENSMUSG00000016194	Hsd11b1	hydroxysteroid 11-beta dehydrogenase 1	-0.3951	0.964329
ENSMUSG00000030200	Bcl2l14	BCL2 like 14	0.3949	0.76327
ENSMUSG00000069306	H4c17	H4 clustered histone 17	-0.3948	1
ENSMUSG00000039672	Kcne2	potassium voltage-gated channel, Isk-related subfa...	0.3948	0.76327
ENSMUSG00000035365	Parpbp	PARP1 binding protein	0.3948	0.748334
ENSMUSG00000073758	Sh3d21	SH3 domain containing 21	-0.3948	1
ENSMUSG00000058163	Gm5431	predicted gene 5431	-0.3946	0.819419
ENSMUSG00000057469	E2f6	E2F transcription factor 6	-0.3946	0.842195
ENSMUSG00000040877	Wdr25	WD repeat domain 25	-0.3946	0.727893
ENSMUSG00000042042	Csgalnact2	chondroitin sulfate N-acetylgalactosaminyltransfer...	-0.3942	0.664015
ENSMUSG00000025271	Pfkfb1	6-phosphofructo-2-kinase/fructose-2,6-biphosphatas...	-0.3942	1
ENSMUSG00000025362	Rps26	ribosomal protein S26	0.3941	0.722543
ENSMUSG00000048279	Sacs	sacsin	0.3941	1
ENSMUSG00000015702	Anxa9	annexin A9	0.3941	0.844938
ENSMUSG00000001763	Tspan33	tetraspanin 33	-0.3938	0.748334
ENSMUSG00000001751	Naglu	alpha-N-acetylglucosaminidase (Sanfilippo disease ...	-0.3938	0.75246
ENSMUSG00000041801	Phlda3	pleckstrin homology like domain, family A, member ...	0.3938	0.932956
ENSMUSG00000027583	Zbtb46	zinc finger and BTB domain containing 46	-0.3938	0.933185
ENSMUSG00000033055	Ankrd54	ankyrin repeat domain 54	-0.3937	0.740402
ENSMUSG00000059005	Hnrnpa3	heterogeneous nuclear ribonucleoprotein A3	0.3936	0.253613
ENSMUSG00000027253	Lrp4	low density lipoprotein receptor-related protein 4	0.3933	0.902237
ENSMUSG00000042817	Flt3	FMS-like tyrosine kinase 3	0.3932	0.886824
ENSMUSG00000001911	Nfix	nuclear factor I/X	0.3931	0.678471
ENSMUSG00000025375	Aatk	apoptosis-associated tyrosine kinase	-0.3931	0.81444
ENSMUSG00000022797	Tfrc	transferrin receptor	0.393	0.409475
ENSMUSG00000024085	Man2a1	mannosidase 2, alpha 1	-0.3929	0.746384
ENSMUSG00000021221	Dpf3	double PHD fingers 3	-0.3928	0.93334
ENSMUSG00000051747	Ttn	titin	0.3928	0.541339
ENSMUSG00000027108	Ola1	Obg-like ATPase 1	0.3926	0.596191
ENSMUSG00000001901	Kcnh6	potassium voltage-gated channel, subfamily H (eag-...	-0.3925	0.841856
ENSMUSG00000035284	Vps13c	vacuolar protein sorting 13C	0.3925	0.670787
ENSMUSG00000020116	Pno1	partner of NOB1 homolog	0.3924	0.27472
ENSMUSG00000028478	Clta	clathrin light chain A	0.3923	0.0060935
ENSMUSG00000041797	Abca9	ATP-binding cassette, sub-family A member 9	-0.3923	0.0433847
ENSMUSG00000002985	Apoe	apolipoprotein E	0.3921	0.103387
ENSMUSG00000037922	Bank1	B cell scaffold protein with ankyrin repeats 1	-0.392	0.138076
ENSMUSG00000030352	Tspan9	tetraspanin 9	-0.3919	0.339406
ENSMUSG00000052085	Dock8	dedicator of cytokinesis 8	-0.3919	0.0425655
ENSMUSG00000042743	Sgtb	small glutamine-rich tetratricopeptide repeat (TPR...	-0.3918	1
ENSMUSG00000022246	Rai14	retinoic acid induced 14	0.3917	0.718913
ENSMUSG00000028463	Car9	carbonic anhydrase 9	-0.3915	0.917846
ENSMUSG00000026274	Pask	PAS domain containing serine/threonine kinase	0.3915	1
ENSMUSG00000035992	Fnip1	folliculin interacting protein 1	-0.3914	0.434212
ENSMUSG00000052142	Rasal3	RAS protein activator like 3	-0.3914	0.714976
ENSMUSG00000021606	Ndufs6	NADH:ubiquinone oxidoreductase core subunit S6	0.3914	0.525481
ENSMUSG00000091086	Rpl6l	ribosomal protein L6-like	0.3913	0.999243
ENSMUSG00000033499	Larp4b	La ribonucleoprotein 4B	-0.3913	0.232495
ENSMUSG00000063972	Nr6a1	nuclear receptor subfamily 6, group A, member 1	0.3912	1
ENSMUSG00000021892	Sh3bp5	SH3-domain binding protein 5 (BTK-associated)	-0.391	0.42346
ENSMUSG00000017485	Top2b	topoisomerase (DNA) II beta	-0.391	0.519361
ENSMUSG00000038990	Cables2	CDK5 and Abl enzyme substrate 2	-0.3909	0.706835
ENSMUSG00000047342	Zfp286	zinc finger protein 286	-0.3908	0.743222
ENSMUSG00000019818	Cd164	CD164 antigen	-0.3907	0.0010382
ENSMUSG00000029651	Mtus2	microtubule associated tumor suppressor candidate ...	-0.3907	0.885846
ENSMUSG00000028312	Smc2	structural maintenance of chromosomes 2	0.3906	0.653322
ENSMUSG00000025938	Slco5a1	solute carrier organic anion transporter family, m...	0.3906	1
ENSMUSG00000021051	Ppp2r5e	protein phosphatase 2, regulatory subunit B', epsi...	-0.3903	0.734047
ENSMUSG00000024659	Anxa1	annexin A1	0.3903	0.973741
ENSMUSG00000030793	Pycard	PYD and CARD domain containing	0.3903	0.002679
ENSMUSG00000050410	Tcf19	transcription factor 19	0.3902	0.822245
ENSMUSG00000025364	Pa2g4	proliferation-associated 2G4	0.39	0.30763
ENSMUSG00000022237	Ankrd33b	ankyrin repeat domain 33B	0.3899	0.940864
ENSMUSG00000058558	Rpl5	ribosomal protein L5	0.3898	0.03384
ENSMUSG00000038705	Gmeb2	glucocorticoid modulatory element binding protein ...	-0.3898	0.656232
ENSMUSG00000020717	Pecam1	platelet/endothelial cell adhesion molecule 1	-0.3897	0.642003
ENSMUSG00000079298	Klrb1b	killer cell lectin-like receptor subfamily B membe...	0.3897	0.93334
ENSMUSG00000026384	Ptpn4	protein tyrosine phosphatase, non-receptor type 4	0.3896	1
ENSMUSG00000062007	Hsh2d	hematopoietic SH2 domain containing	0.3896	0.93334
ENSMUSG00000023965	Fbxl17	F-box and leucine-rich repeat protein 17	0.3894	0.871076
ENSMUSG00000053835	H2-T24	histocompatibility 2, T region locus 24	0.3894	0.540992
ENSMUSG00000023307	Marchf5	membrane associated ring-CH-type finger 5	-0.3892	0.37938
ENSMUSG00000049176	Frmpd4	FERM and PDZ domain containing 4	-0.3892	0.97495
ENSMUSG00000021144	Mta1	metastasis associated 1	0.3891	0.875818
ENSMUSG00000066232	Ipo7	importin 7	-0.3891	0.531836
ENSMUSG00000001995	Sipa1l2	signal-induced proliferation-associated 1 like 2	-0.389	0.101136
ENSMUSG00000034675	Dbn1	drebrin 1	-0.3889	0.746384
ENSMUSG00000018906	P4ha2	procollagen-proline, 2-oxoglutarate 4-dioxygenase ...	0.3888	0.99855
ENSMUSG00000034156	Tspoap1	TSPO associated protein 1	0.3887	0.748334
ENSMUSG00000030921	Trim30a	tripartite motif-containing 30A	0.3887	0.0506076
ENSMUSG00000045273	Cenph	centromere protein H	0.3887	1
ENSMUSG00000091996	Smim35	small integral membrane protein 35	-0.3886	0.767454
ENSMUSG00000047242	Taf9b	TATA-box binding protein associated factor 9B	-0.3886	0.825125
ENSMUSG00000005267	Zfp287	zinc finger protein 287	-0.3885	0.728658
ENSMUSG00000071451	Psmg4	proteasome (prosome, macropain) assembly chaperone...	0.3885	0.899693
ENSMUSG00000027907	S100a11	S100 calcium binding protein A11	0.3884	0.877077
ENSMUSG00000078429	Ctdsp2	CTD small phosphatase 2	-0.3883	0.497134
ENSMUSG00000072972	Adam4	a disintegrin and metallopeptidase domain 4	0.3881	0.734227
ENSMUSG00000048772	Tmem53	transmembrane protein 53	-0.3881	1
ENSMUSG00000038418	Egr1	early growth response 1	-0.388	0.657386
ENSMUSG00000028643	Svbp	small vasohibin binding protein	0.388	0.441534
ENSMUSG00000037902	Sirpa	signal-regulatory protein alpha	-0.388	0.024784
ENSMUSG00000034390	Cmip	c-Maf inducing protein	0.3879	0.596191
ENSMUSG00000037306	Man1c1	mannosidase, alpha, class 1C, member 1	-0.3874	0.0790201
ENSMUSG00000024855	Pacs1	phosphofurin acidic cluster sorting protein 1	-0.3873	0.513982
ENSMUSG00000046516	Cox17	cytochrome c oxidase assembly protein 17, copper c...	0.3873	0.619866
ENSMUSG00000004359	Spic	Spi-C transcription factor (Spi-1/PU.1 related)	0.3872	0.93334
ENSMUSG00000021453	Gadd45g	growth arrest and DNA-damage-inducible 45 gamma	0.387	0.160992
ENSMUSG00000071253	Slc25a16	solute carrier family 25 (mitochondrial carrier, G...	-0.3869	0.718602
ENSMUSG00000042759	Apobr	apolipoprotein B receptor	-0.3868	0.490592
ENSMUSG00000042742	Bmt2	base methyltransferase of 25S rRNA 2	-0.3867	0.919115
ENSMUSG00000063954	H2ac19	H2A clustered histone 19	-0.3864	0.62635
ENSMUSG00000058174	Gm5148	predicted gene 5148	0.3863	1
ENSMUSG00000026796	Niban2	niban apoptosis regulator 2	0.3863	0.650153
ENSMUSG00000027834	Serpini1	serine (or cysteine) peptidase inhibitor, clade I,...	-0.3863	0.93334
ENSMUSG00000042423	Fbrs	fibrosin	0.3862	0.603124
ENSMUSG00000042770	Hebp1	heme binding protein 1	0.3861	0.840435
ENSMUSG00000043556	Fbxl7	F-box and leucine-rich repeat protein 7	-0.3861	0.93334
ENSMUSG00000059248	Septin9	septin 9	0.386	0.665818
ENSMUSG00000039943	Plcb4	phospholipase C, beta 4	-0.386	1
ENSMUSG00000023046	Igfbp6	insulin-like growth factor binding protein 6	0.3859	0.987491
ENSMUSG00000055555	Ct55	cancer/testis antigen 55	-0.3858	0.759315
ENSMUSG00000090942	F830016B08Rik	RIKEN cDNA F830016B08 gene	0.3857	0.902237
ENSMUSG00000047721	Bola2	bolA family member 2	0.3856	0.43229
ENSMUSG00000036585	Fgf1	fibroblast growth factor 1	0.3855	1
ENSMUSG00000039126	Prune2	prune homolog 2	0.3855	0.461055
ENSMUSG00000074403	H3c13	H3 clustered histone 13	-0.3854	0.989295
ENSMUSG00000022216	Psme1	proteasome (prosome, macropain) activator subunit ...	0.3853	0.013134
ENSMUSG00000091908	Gm17231	predicted gene 17231	-0.3851	0.819419
ENSMUSG00000030708	Dnajb13	DnaJ heat shock protein family (Hsp40) member B13	-0.385	0.514434
ENSMUSG00000033450	Tagap	T cell activation Rho GTPase activating protein	-0.3849	0.221726
ENSMUSG00000020836	Coro6	coronin 6	-0.3849	1
ENSMUSG00000007033	Hspa1l	heat shock protein 1-like	0.3849	0.856969
ENSMUSG00000009281	Rarres2	retinoic acid receptor responder (tazarotene induc...	-0.3849	0.759315
ENSMUSG00000042874	D930007J09Rik	RIKEN cDNA D930007J09 gene	-0.3849	0.879299
ENSMUSG00000028964	Park7	Parkinson disease (autosomal recessive, early onse...	0.3848	0.0148642
ENSMUSG00000046330	Rpl37a	ribosomal protein L37a	0.3847	0.636931
ENSMUSG00000050192	Eif5a2	eukaryotic translation initiation factor 5A2	-0.3846	0.892312
ENSMUSG00000036427	Gpi1	glucose-6-phosphate isomerase 1	0.3845	0.0035908
ENSMUSG00000023034	Nr4a1	nuclear receptor subfamily 4, group A, member 1	-0.3844	0.762621
ENSMUSG00000036537	Rnf113a1	ring finger protein 113A1	0.3844	0.879403
ENSMUSG00000038080	Kdm1b	lysine (K)-specific demethylase 1B	-0.3841	0.3674
ENSMUSG00000043391	2510009E07Rik	RIKEN cDNA 2510009E07 gene	-0.384	0.812365
ENSMUSG00000022403	St13	suppression of tumorigenicity 13	0.3839	0.0529214
ENSMUSG00000028467	Gba2	glucosidase beta 2	-0.3837	0.0766245
ENSMUSG00000031442	Mcf2l	mcf.2 transforming sequence-like	0.3836	0.964329
ENSMUSG00000032126	Hmbs	hydroxymethylbilane synthase	0.3836	0.0452789
ENSMUSG00000013858	Tmem259	transmembrane protein 259	0.3835	0.574317
ENSMUSG00000074158	Zfp976	zinc finger protein 976	-0.3834	0.760548
ENSMUSG00000064181	Rab3ip	RAB3A interacting protein	-0.3834	0.448421
ENSMUSG00000089857	Zfp882	zinc finger protein 882	-0.3833	0.833213
ENSMUSG00000022580	Rhpn1	rhophilin, Rho GTPase binding protein 1	0.3832	0.973181
ENSMUSG00000041736	Tspo	translocator protein	0.383	0.0225123
ENSMUSG00000027737	Slc7a11	solute carrier family 7 (cationic amino acid trans...	-0.383	0.711378
ENSMUSG00000043311	D17H6S53E	DNA segment, Chr 17, human D6S53E	0.383	0.819419
ENSMUSG00000052673	Gm9887	predicted gene 9887	-0.3829	0.813108
ENSMUSG00000070407	Hs3st3b1	heparan sulfate (glucosamine) 3-O-sulfotransferase...	-0.3829	0.763892
ENSMUSG00000020432	Tcn2	transcobalamin 2	-0.3829	0.005623
ENSMUSG00000051518	Rps19bp1	ribosomal protein S19 binding protein 1	0.3827	0.482323
ENSMUSG00000091144	Phf11c	PHD finger protein 11C	0.3826	1
ENSMUSG00000023249	Parp3	poly (ADP-ribose) polymerase family, member 3	0.3826	0.34191
ENSMUSG00000042978	Sbk1	SH3-binding kinase 1	-0.3825	1
ENSMUSG00000021368	Tbc1d7	TBC1 domain family, member 7	0.3824	0.753405
ENSMUSG00000017737	Mmp9	matrix metallopeptidase 9	0.3823	1
ENSMUSG00000029478	Ncor2	nuclear receptor co-repressor 2	0.3822	0.840132
ENSMUSG00000032418	Me1	malic enzyme 1, NADP(+)-dependent, cytosolic	-0.3821	0.93334
ENSMUSG00000019471	Cdc37	cell division cycle 37	0.382	0.0046497
ENSMUSG00000047293	Gpr15	G protein-coupled receptor 15	0.3819	0.76327
ENSMUSG00000035413	Tmem98	transmembrane protein 98	0.3818	1
ENSMUSG00000057132	Rpgrip1	retinitis pigmentosa GTPase regulator interacting ...	-0.3814	0.879432
ENSMUSG00000027360	Hdc	histidine decarboxylase	-0.3814	0.97495
ENSMUSG00000028678	Kif2c	kinesin family member 2C	0.3812	0.736512
ENSMUSG00000021876	Rnase4	ribonuclease, RNase A family 4	-0.3811	0.005078
ENSMUSG00000090290	Tarbp1	TAR RNA binding protein 1	-0.3811	0.901276
ENSMUSG00000037725	Ckap2	cytoskeleton associated protein 2	0.3811	1
ENSMUSG00000038507	Parp12	poly (ADP-ribose) polymerase family, member 12	-0.3809	0.760469
ENSMUSG00000042369	Rbm45	RNA binding motif protein 45	-0.3809	0.727287
ENSMUSG00000022479	Vdr	vitamin D (1,25-dihydroxyvitamin D3) receptor	0.3808	1
ENSMUSG00000027304	Rtf1	RTF1, Paf1/RNA polymerase II complex component	0.3808	0.647633
ENSMUSG00000069911	Insyn2b	inhibitory synaptic factor family member 2B	-0.3808	0.849289
ENSMUSG00000022807	Osbpl11	oxysterol binding protein-like 11	-0.3807	0.739426
ENSMUSG00000059108	Ifitm6	interferon induced transmembrane protein 6	0.3807	0.840435
ENSMUSG00000061535	C1qtnf7	C1q and tumor necrosis factor related protein 7	-0.3807	0.964329
ENSMUSG00000014602	Kif1a	kinesin family member 1A	0.3807	1
ENSMUSG00000019877	Serinc1	serine incorporator 1	-0.3806	0.0034468
ENSMUSG00000057329	Bcl2	B cell leukemia/lymphoma 2	-0.3804	0.727078
ENSMUSG00000026970	Rbms1	RNA binding motif, single stranded interacting pro...	-0.3802	0.598893
ENSMUSG00000000088	Cox5a	cytochrome c oxidase subunit 5A	0.3802	0.270406
ENSMUSG00000036882	Arhgap33	Rho GTPase activating protein 33	0.3802	0.932956
ENSMUSG00000038085	Cnbd2	cyclic nucleotide binding domain containing 2	-0.3801	0.650153
ENSMUSG00000001794	Capns1	calpain, small subunit 1	0.3801	0.232495
ENSMUSG00000052397	Ezr	ezrin	0.3799	0.796662
ENSMUSG00000036362	P2ry13	purinergic receptor P2Y, G-protein coupled 13	-0.3798	0.0044806
ENSMUSG00000089865	Gm44503	predicted readthrough transcript (NMD candidate), ...	-0.3798	0.0103633
ENSMUSG00000022528	Hes1	hes family bHLH transcription factor 1	-0.3797	1
ENSMUSG00000058927	Gm10053	predicted gene 10053	0.3796	0.909549
ENSMUSG00000001416	Cct3	chaperonin containing TCP1 subunit 3	0.3796	0.0084541
ENSMUSG00000011257	Pabpc4	poly(A) binding protein, cytoplasmic 4	0.3795	0.66817
ENSMUSG00000075122	Cd80	CD80 antigen	-0.3794	0.545578
ENSMUSG00000031958	Ldhd	lactate dehydrogenase D	-0.3793	0.784331
ENSMUSG00000032187	Smarca4	SWI/SNF related, matrix associated, actin dependen...	0.3793	0.0045511
ENSMUSG00000005125	Ndrg1	N-myc downstream regulated gene 1	0.3791	0.999243
ENSMUSG00000032470	Mras	muscle and microspikes RAS	-0.379	0.659082
ENSMUSG00000021258	Ccnk	cyclin K	0.3789	1
ENSMUSG00000013974	Mcemp1	mast cell expressed membrane protein 1	0.3787	0.892364
ENSMUSG00000056508	1700001K19Rik	RIKEN cDNA 1700001K19 gene	0.3787	1
ENSMUSG00000039910	Cited2	Cbp/p300-interacting transactivator, with Glu/Asp-...	-0.3787	0.666455
ENSMUSG00000024910	Ctsw	cathepsin W	-0.3786	1
ENSMUSG00000039656	Rxrb	retinoid X receptor beta	-0.3783	0.3062
ENSMUSG00000049751	Rpl36al	ribosomal protein L36A-like	0.3782	0.221672
ENSMUSG00000056019	Zfp709	zinc finger protein 709	-0.3782	0.575974
ENSMUSG00000043664	Tmem221	transmembrane protein 221	-0.3782	0.731396
ENSMUSG00000035443	Thyn1	thymocyte nuclear protein 1	0.378	0.394117
ENSMUSG00000054640	Slc8a1	solute carrier family 8 (sodium/calcium exchanger)...	-0.378	0.647837
ENSMUSG00000043716	Rpl7	ribosomal protein L7	0.378	0.0221798
ENSMUSG00000040848	Sft2d2	SFT2 domain containing 2	-0.378	0.0269925
ENSMUSG00000048120	Entpd1	ectonucleoside triphosphate diphosphohydrolase 1	-0.3779	0.0110295
ENSMUSG00000036006	Ripor2	RHO family interacting cell polarization regulator...	0.3778	0.385311
ENSMUSG00000040918	Slc19a2	solute carrier family 19 (thiamine transporter), m...	-0.3774	0.777373
ENSMUSG00000055670	Zzef1	zinc finger, ZZ-type with EF hand domain 1	0.3773	0.447606
ENSMUSG00000051169	Rpusd3	RNA pseudouridylate synthase domain containing 3	0.3771	0.819419
ENSMUSG00000087687	Pet100	PET100 homolog	0.3771	0.84921
ENSMUSG00000043192	Gpi-ps	glucose-6-phosphate isomerase, pseudogene	0.3768	0.937687
ENSMUSG00000053604	Rpia	ribose 5-phosphate isomerase A	0.3768	0.902237
ENSMUSG00000029649	Pomp	proteasome maturation protein	0.3767	0.0376641
ENSMUSG00000025192	Entpd7	ectonucleoside triphosphate diphosphohydrolase 7	0.3764	0.734715
ENSMUSG00000039556	Ppp1r3f	protein phosphatase 1, regulatory subunit 3F	-0.3764	1
ENSMUSG00000044328	Trp53i13	transformation related protein 53 inducible protei...	-0.3763	0.470588
ENSMUSG00000019961	Tmpo	thymopoietin	-0.3763	0.376317
ENSMUSG00000070873	Lilra5	leukocyte immunoglobulin-like receptor, subfamily ...	-0.3762	0.210974
ENSMUSG00000020713	Gh	growth hormone	0.3762	0.964329
ENSMUSG00000044452	Zfp507	zinc finger protein 507	-0.3762	0.93334
ENSMUSG00000054435	Gimap4	GTPase, IMAP family member 4	0.3761	0.964329
ENSMUSG00000005054	Cstb	cystatin B	0.3761	0.124507
ENSMUSG00000031072	LTO1	ABCE maturation factor	0.3759	0.318738
ENSMUSG00000022026	Olfm4	olfactomedin 4	-0.3759	0.813108
ENSMUSG00000040102	Klhl42	kelch-like 42	-0.3758	0.742964
ENSMUSG00000038274	Fau	FAU ubiquitin like and ribosomal protein S30 fusio...	0.3753	0.267563
ENSMUSG00000004929	Thop1	thimet oligopeptidase 1	0.3752	0.246945
ENSMUSG00000032892	Rangrf	RAN guanine nucleotide release factor	0.3751	0.819419
ENSMUSG00000042476	Abcb4	ATP-binding cassette, sub-family B member 4	-0.375	0.525454
ENSMUSG00000029490	Slc49a3	solute carrier family 49 member 3	-0.375	0.941246
ENSMUSG00000014633	Cmc2	C-X9-C motif containing 2	0.375	0.879432
ENSMUSG00000050994	Adgb	androglobin	0.3749	0.984179
ENSMUSG00000031851	Ntpcr	nucleoside-triphosphatase, cancer-related	0.3745	0.0022197
ENSMUSG00000020232	Hmg20b	high mobility group 20B	0.3744	0.611072
ENSMUSG00000080727	C920021L13Rik	RIKEN cDNA C920021L13 gene	-0.3744	0.313447
ENSMUSG00000054720	Lrrc8c	leucine rich repeat containing 8 family, member C	-0.3741	0.86816
ENSMUSG00000038963	Slco4a1	solute carrier organic anion transporter family, m...	-0.3741	0.138076
ENSMUSG00000032815	Fanca	Fanconi anemia, complementation group A	0.374	0.478377
ENSMUSG00000040860	Crocc	ciliary rootlet coiled-coil, rootletin	-0.374	0.930285
ENSMUSG00000068747	Sort1	sortilin 1	-0.3736	0.110414
ENSMUSG00000009941	Nxf2	nuclear RNA export factor 2	-0.3734	1
ENSMUSG00000042524	Sun2	Sad1 and UNC84 domain containing 2	-0.3733	0.80251
ENSMUSG00000022951	Rcan1	regulator of calcineurin 1	-0.3733	0.119539
ENSMUSG00000004891	Nes	nestin	0.3732	0.819419
ENSMUSG00000030088	Aldh1l1	aldehyde dehydrogenase 1 family, member L1	-0.3731	0.921859
ENSMUSG00000023232	Serinc2	serine incorporator 2	0.373	0.964329
ENSMUSG00000079020	Slc45a4	solute carrier family 45, member 4	0.373	0.617228
ENSMUSG00000026434	Nucks1	nuclear casein kinase and cyclin-dependent kinase ...	0.3729	0.463853
ENSMUSG00000025199	Chuk	conserved helix-loop-helix ubiquitous kinase	-0.3729	0.347001
ENSMUSG00000079038	D130040H23Rik	RIKEN cDNA D130040H23 gene	-0.3729	1
ENSMUSG00000029372	Ppbp	pro-platelet basic protein	-0.3728	1
ENSMUSG00000025508	Rplp2	ribosomal protein lateral stalk subunit P2	0.3726	0.477022
ENSMUSG00000073702	Rpl31	ribosomal protein L31	0.3726	0.611225
ENSMUSG00000022987	Zfp641	zinc finger protein 641	-0.3724	0.945548
ENSMUSG00000017499	Cdc6	cell division cycle 6	0.3723	1
ENSMUSG00000002617	Zfp40	zinc finger protein 40	-0.3723	0.650337
ENSMUSG00000055762	Eef1d	eukaryotic translation elongation factor 1 delta	0.3722	0.0135876
ENSMUSG00000015854	Cd5l	CD5 antigen-like	0.3722	1
ENSMUSG00000035274	Tpbg	trophoblast glycoprotein	-0.3721	0.93334
ENSMUSG00000030450	Oca2	oculocutaneous albinism II	0.3717	0.748334
ENSMUSG00000000058	Cav2	caveolin 2	-0.3714	0.833213
ENSMUSG00000035671	Zswim4	zinc finger SWIM-type containing 4	-0.3714	0.277951
ENSMUSG00000033545	Znrf1	zinc and ring finger 1	-0.3713	0.553405
ENSMUSG00000048856	Slc25a47	solute carrier family 25, member 47	0.3713	0.849271
ENSMUSG00000037095	Lrg1	leucine-rich alpha-2-glycoprotein 1	-0.3713	0.879299
ENSMUSG00000031129	Slc9a9	solute carrier family 9 (sodium/hydrogen exchanger...	-0.3712	0.0203908
ENSMUSG00000022234	Cct5	chaperonin containing TCP1 subunit 5	0.3712	0.0093273
ENSMUSG00000034949	Zfr2	zinc finger RNA binding protein 2	-0.3711	1
ENSMUSG00000055271	9330161L09Rik	RIKEN cDNA 9330161L09 gene	0.3711	0.93334
ENSMUSG00000032035	Ets1	E26 avian leukemia oncogene 1, 5' domain	-0.3709	0.0313711
ENSMUSG00000047205	Dusp18	dual specificity phosphatase 18	-0.3708	0.856304
ENSMUSG00000074215	Gm10643	predicted gene 10643	-0.3704	0.886824
ENSMUSG00000018217	Pmp22	peripheral myelin protein 22	-0.3704	0.007312
ENSMUSG00000070369	Itgad	integrin, alpha D	-0.3704	1
ENSMUSG00000087385	Frg2f1	FSHD region gene 2 family member 1	-0.3704	1
ENSMUSG00000063146	Clip2	CAP-GLY domain containing linker protein 2	0.3703	0.66979
ENSMUSG00000033938	Ndufb7	NADH:ubiquinone oxidoreductase subunit B7	0.3703	0.29635
ENSMUSG00000091337	Eid1	EP300 interacting inhibitor of differentiation 1	0.3701	0.640528
ENSMUSG00000074579	Lekr1	leucine, glutamate and lysine rich 1	0.37	0.920055
ENSMUSG00000031825	Crispld2	cysteine-rich secretory protein LCCL domain contai...	-0.3698	0.759315
ENSMUSG00000026980	Ly75	lymphocyte antigen 75	0.3698	0.970241
ENSMUSG00000044167	Foxo1	forkhead box O1	-0.3696	0.679432
ENSMUSG00000043036	Ccdc63	coiled-coil domain containing 63	-0.3696	1
ENSMUSG00000031487	Brf2	BRF2, RNA polymerase III transcription initiation ...	0.3693	0.819419
ENSMUSG00000033323	Ctdp1	CTD phosphatase subunit 1	-0.3692	0.674412
ENSMUSG00000029999	Tgfa	transforming growth factor alpha	-0.3691	0.112474
ENSMUSG00000022253	Nadk2	NAD kinase 2, mitochondrial	-0.3691	0.882084
ENSMUSG00000051319	Mtln	mitoregulin	0.3691	0.819419
ENSMUSG00000046456	Tmem150b	transmembrane protein 150B	0.369	0.849289
ENSMUSG00000048174	Tmem81	transmembrane protein 81	0.369	0.833213
ENSMUSG00000033253	Szt2	SZT2 subunit of KICSTOR complex	0.3688	0.679432
ENSMUSG00000050714	Zbtb26	zinc finger and BTB domain containing 26	-0.3688	1
ENSMUSG00000021610	Clptm1l	CLPTM1-like	-0.3687	0.553405
ENSMUSG00000025175	Fn3k	fructosamine 3 kinase	-0.3686	1
ENSMUSG00000008036	Ap2s1	adaptor-related protein complex 2, sigma 1 subunit	0.3685	0.120248
ENSMUSG00000024427	Spry4	sprouty RTK signaling antagonist 4	0.3685	0.93334
ENSMUSG00000061536	Sec22c	SEC22 homolog C, vesicle trafficking protein	0.3683	1
ENSMUSG00000027438	Napb	N-ethylmaleimide sensitive fusion protein attachme...	-0.3683	0.764381
ENSMUSG00000021699	Pde4d	phosphodiesterase 4D, cAMP specific	-0.3683	1
ENSMUSG00000038793	Lefty1	left right determination factor 1	0.3682	0.674412
ENSMUSG00000037656	Slc20a2	solute carrier family 20, member 2	-0.3681	0.840401
ENSMUSG00000024669	Cd5	CD5 antigen	-0.368	0.746384
ENSMUSG00000013584	Aldh1a2	aldehyde dehydrogenase family 1, subfamily A2	0.368	1
ENSMUSG00000015092	Edf1	endothelial differentiation-related factor 1	0.368	0.174641
ENSMUSG00000035954	Dock4	dedicator of cytokinesis 4	-0.3679	0.272004
ENSMUSG00000030825	Hsd17b14	hydroxysteroid (17-beta) dehydrogenase 14	0.3679	0.964329
ENSMUSG00000026389	Steap3	STEAP family member 3	-0.3679	1
ENSMUSG00000070390	Nlrp1b	NLR family, pyrin domain containing 1B	0.3678	0.430741
ENSMUSG00000042198	Chchd7	coiled-coil-helix-coiled-coil-helix domain contain...	0.3678	0.748334
ENSMUSG00000034653	Ythdc2	YTH domain containing 2	-0.3676	0.849289
ENSMUSG00000040681	Hmgn1	high mobility group nucleosomal binding domain 1	0.3676	0.189693
ENSMUSG00000007987	Ift22	intraflagellar transport 22	0.3673	0.670787
ENSMUSG00000011752	Pgam1	phosphoglycerate mutase 1	0.3671	0.22621
ENSMUSG00000074576	Mocs3	molybdenum cofactor synthesis 3	-0.367	1
ENSMUSG00000043683	Fem1a	fem 1 homolog a	-0.367	0.476515
ENSMUSG00000050967	Creg2	cellular repressor of E1A-stimulated genes 2	0.367	0.819419
ENSMUSG00000039670	Oxld1	oxidoreductase like domain containing 1	0.3669	0.771203
ENSMUSG00000037266	Rsrp1	arginine/serine rich protein 1	-0.3666	0.819419
ENSMUSG00000037235	Mxd4	Max dimerization protein 4	-0.3666	0.451279
ENSMUSG00000097185	Gm26596	predicted gene, 26596	0.3663	0.344183
ENSMUSG00000051906	Cd209f	CD209f antigen	0.3662	0.902237
ENSMUSG00000024896	Minpp1	multiple inositol polyphosphate histidine phosphat...	-0.3661	0.742678
ENSMUSG00000029408	Abcb9	ATP-binding cassette, sub-family B member 9	-0.366	0.850026
ENSMUSG00000030643	Rab30	RAB30, member RAS oncogene family	0.366	0.748334
ENSMUSG00000095325	Zfp870	zinc finger protein 870	-0.3658	0.64116
ENSMUSG00000006585	Cdt1	chromatin licensing and DNA replication factor 1	0.3657	0.616752
ENSMUSG00000028161	Ppp3ca	protein phosphatase 3, catalytic subunit, alpha is...	-0.3656	0.318738
ENSMUSG00000015709	Arnt2	aryl hydrocarbon receptor nuclear translocator 2	-0.3653	0.964329
ENSMUSG00000070462	Tlnrd1	talin rod domain containing 1	-0.3651	0.892312
ENSMUSG00000022972	Cfap298	cilia and flagella associate protien 298	0.365	0.692244
ENSMUSG00000002658	Gtf2f1	general transcription factor IIF, polypeptide 1	0.3647	0.0187565
ENSMUSG00000020018	Snrpf	small nuclear ribonucleoprotein polypeptide F	0.3647	0.882264
ENSMUSG00000032330	Cox7a2	cytochrome c oxidase subunit 7A2	0.3645	0.514434
ENSMUSG00000010376	Nedd8	neural precursor cell expressed, developmentally d...	0.3644	0.0997608
ENSMUSG00000037487	Ubr5	ubiquitin protein ligase E3 component n-recognin 5	0.3644	0.736971
ENSMUSG00000062382	Ftl1-ps2	ferritin light polypeptide, pseudogene 2	0.3642	0.0854295
ENSMUSG00000013418	B4galnt2	beta-1,4-N-acetyl-galactosaminyl transferase 2	0.364	0.964329
ENSMUSG00000079610	Ankrd39	ankyrin repeat domain 39	-0.364	0.352916
ENSMUSG00000024959	Bad	BCL2-associated agonist of cell death	0.3639	0.266785
ENSMUSG00000022391	Rangap1	RAN GTPase activating protein 1	0.3638	0.173553
ENSMUSG00000030557	Mef2a	myocyte enhancer factor 2A	-0.3638	0.138062
ENSMUSG00000020009	Ifngr1	interferon gamma receptor 1	-0.3638	0.0033123
ENSMUSG00000020689	Itgb3	integrin beta 3	-0.3637	0.184324
ENSMUSG00000054932	Afp	alpha fetoprotein	0.3637	0.841856
ENSMUSG00000055725	Paqr3	progestin and adipoQ receptor family member III	-0.3636	0.720124
ENSMUSG00000002032	Tmem25	transmembrane protein 25	0.3636	0.93334
ENSMUSG00000027422	Rrbp1	ribosome binding protein 1	0.3636	0.034204
ENSMUSG00000036377	Cracd	capping protein inhibiting regulator of actin	0.3635	0.93334
ENSMUSG00000047767	Atg16l2	autophagy related 16 like 2	-0.3634	0.526389
ENSMUSG00000079386	Gm3173	predicted gene 3173	-0.3632	1
ENSMUSG00000005947	Itgae	integrin alpha E, epithelial-associated	-0.3631	0.926988
ENSMUSG00000021244	Ylpm1	YLP motif containing 1	0.363	0.634356
ENSMUSG00000060636	Rpl35a	ribosomal protein L35A	0.3627	0.665475
ENSMUSG00000020893	Per1	period circadian clock 1	-0.3626	0.734537
ENSMUSG00000029598	Plbd2	phospholipase B domain containing 2	-0.3625	0.796883
ENSMUSG00000061589	Dot1l	DOT1 like histone lysine methyltransferase	0.3623	0.727287
ENSMUSG00000036218	Pdzrn4	PDZ domain containing RING finger 4	-0.3623	1
ENSMUSG00000026791	Slc2a8	solute carrier family 2, (facilitated glucose tran...	-0.3623	0.0985866
ENSMUSG00000039328	Rnf122	ring finger protein 122	-0.3622	0.585068
ENSMUSG00000030102	Itpr1	inositol 1,4,5-trisphosphate receptor 1	0.362	0.798535
ENSMUSG00000029641	Rasl11a	RAS-like, family 11, member A	-0.3618	0.93334
ENSMUSG00000050106	Tmc8	transmembrane channel-like gene family 8	-0.3617	1
ENSMUSG00000047067	Dusp28	dual specificity phosphatase 28	0.3617	0.989612
ENSMUSG00000032727	Mier3	MIER family member 3	-0.3616	0.657668
ENSMUSG00000021838	Samd4	sterile alpha motif domain containing 4	-0.3614	0.746384
ENSMUSG00000027875	Hmgcs2	3-hydroxy-3-methylglutaryl-Coenzyme A synthase 2	0.3613	1
ENSMUSG00000026303	Mlph	melanophilin	-0.3612	0.33547
ENSMUSG00000074170	Plekhf1	pleckstrin homology domain containing, family F (w...	0.3612	0.945284
ENSMUSG00000016252	Atp5f1e	ATP synthase F1 subunit epsilon	0.3611	0.79234
ENSMUSG00000048058	Ldlrad3	low density lipoprotein receptor class A domain co...	0.3611	0.940864
ENSMUSG00000062980	Cped1	cadherin-like and PC-esterase domain containing 1	-0.3609	0.964329
ENSMUSG00000067367	Lyar	Ly1 antibody reactive clone	0.3608	0.601467
ENSMUSG00000042747	Krtcap2	keratinocyte associated protein 2	0.3608	0.266304
ENSMUSG00000030785	Cox6a2	cytochrome c oxidase subunit 6A2	0.3606	0.905444
[truncated: 15,092 more rows]
