# Supplementary material for: P2RX7 regulates tauopathy progression via tau and mitochondria loading in extracellular vesicles
Source: Research Square preprint supplement (doi:10.21203/rs.3.rs-6771517/v1), 2025-06-23
Supplement: Supplementary file 5 [file 7b1dbfd78bea214bd1582248.xlsx]

## Sheet: DE-Homeo
logFC	AveExpr	p_val_adj	gene_names
-5.018	2.221	2.694e-07	Cd36
-4.838	4.023	0.04347	Gm47283
-4.552	4.48	0.0004616	Cd300lf
-4.35	1.91	0.0004616	4930519F16Rik
-4.124	2.171	3.478e-06	Gm29536
-4.113	2.144	0.001026	Actr3-ps
-3.51	6.119	2.694e-07	Nrxn1
-3.464	2.649	0.002543	Rab37
-3.163	2.413	0.05976	Cacng8
-3.124	4.549	0.001314	Colec12
-2.962	2.826	0.144	Gm49692
-2.901	5.653	2.694e-07	Nme7
-2.841	2.371	0.1066	Pianp
-2.509	9.846	1.342e-12	Arsb
-2.182	2.632	0.1727	Map3k19
-2.018	5.276	0.004413	Qsox1
-1.967	2.414	0.0144	Trmt10c
-1.885	4.862	0.001677	Sfmbt2
-1.871	2.5	0.0321	Tmem160
-1.85	4.982	0.6243	Msh5
-1.819	4.864	0.006331	Cd52
-1.814	2.839	0.1868	Bcl2a1a
-1.81	4.372	0.3421	Gnb4
-1.781	4.191	0.262	Angptl7
-1.759	6.753	0.4842	Gatm
-1.748	4.416	0.4645	Magi2
-1.741	4.085	0.3914	Cd244a
-1.727	2.642	0.1342	Ebpl
-1.718	2.679	0.2149	Mif
-1.714	3.952	0.4737	Slc15a2
-1.713	3.353	0.3301	Fgl2
-1.702	3.299	0.1849	9330185C12Rik
-1.67	2.58	0.05402	Fzd7
-1.668	3.453	0.07158	Myc
-1.663	2.917	0.02421	Camkk1
-1.657	2.439	0.05446	Slirp
-1.639	3.117	0.4304	Unc5cl
-1.603	3.041	0.04202	Hes1
-1.586	7.319	0.5634	Cacna1a
-1.561	3.559	0.0321	B4galnt1
-1.542	2.898	0.04693	Tmem185a
-1.512	5.311	0.0004955	Nudc
-1.508	3.622	0.3027	Gpr165
-1.501	4.291	0.08825	Gm10138
-1.493	3.193	0.0844	Yif1b
-1.487	5.001	0.0107	Arhgap15
-1.442	2.621	0.08821	1110038F14Rik
-1.439	2.981	0.1223	Cnn2
-1.439	4.473	0.1512	Prkcq
-1.423	5.768	0.0007876	Alox5
-1.414	3.441	0.3095	Ccrl2
-1.411	3.491	0.1083	Ndufs8
-1.401	3.599	0.09062	Crlf2
-1.389	3.483	0.0736	Mcc
-1.384	2.936	0.2012	Gm12166
-1.37	2.709	0.1041	Plppr4
-1.368	3.745	0.1063	Notch4
-1.366	5.346	0.03204	Cmtm8
-1.362	3.489	0.327	Col25a1
-1.343	3.41	0.1092	Spry1
-1.321	2.599	0.3618	Pmaip1
-1.306	2.64	0.1048	Mrpl19
-1.301	3.956	0.0321	Slamf8
-1.299	2.562	0.0666	Rcan2
-1.298	3.063	0.05547	Jagn1
-1.295	3.078	0.1426	Chic1
-1.293	2.611	0.1092	Med11
-1.27	3.236	0.07274	Itgax
-1.261	6.314	0.002514	Cd34
-1.257	3.124	0.4653	Ccl3
-1.252	2.873	0.1961	Tspo
-1.238	3.79	0.03287	Nol9
-1.237	3.987	0.02272	Cnih1
-1.236	3.371	0.11	D630045J12Rik
-1.234	3.233	0.1312	Gpr35
-1.234	3.693	0.6796	Fos
-1.213	7.584	8.169e-05	Xpr1
-1.209	3.947	0.04681	Bmyc
-1.205	3.263	0.2312	H1f4
-1.193	2.971	0.1071	Kcp
-1.19	4.535	0.0144	Rab32
-1.19	13.18	0.07428	Lars2
-1.188	4.358	0.1525	Ccdc62
-1.186	3.016	0.2063	Gm37229
-1.183	3.243	0.1999	Sec61b
-1.177	2.892	0.1506	Nabp1
-1.171	2.888	0.1429	Ahi1
-1.17	4.877	0.1743	Naaa
-1.169	3.892	0.1431	Ptger3
-1.163	4.446	0.04165	Marcksl1
-1.163	4.074	0.06974	Plekhh2
-1.154	2.599	0.1711	Mrpl41
-1.152	5.588	0.1847	Ube2e2
-1.149	3.79	0.05327	Sprtn
-1.149	3.034	0.1073	Tsr2
-1.146	5.612	0.003309	Gpx1
-1.144	4.044	0.5718	Fosb
-1.142	5.46	0.1939	Rpl12
-1.141	2.64	0.2209	Lrrc8b
-1.14	3.293	0.07369	3110009E18Rik
-1.134	2.402	0.1923	Psmb5
-1.131	2.851	0.2212	Cand2
-1.13	4.179	0.05063	Tagln2
-1.129	4.43	0.04347	A630089N07Rik
-1.129	9.531	0.06793	Gm15564
-1.129	3.538	0.1063	Arhgef3
-1.129	3.481	0.1721	Trib1
-1.128	2.559	0.1978	Gramd3
-1.127	3.911	0.2214	Jam3
-1.12	3.532	0.5203	Ccl4
-1.116	2.866	0.2044	1600022D10Rik
-1.115	3.174	0.1973	Uqcrq
-1.098	4.746	0.0321	Snrpb
-1.097	3.985	0.05106	Selenon
-1.096	7.322	0.5391	Nhs
-1.095	5.69	0.009042	Rpl11
-1.094	2.677	0.2148	Smpdl3b
-1.092	2.901	0.1269	Dpm2
-1.091	4.538	0.1662	Sdf2l1
-1.088	2.833	0.1863	Batf
-1.084	2.68	0.5193	Gm37876
-1.082	2.753	0.2171	Atp5mpl
-1.076	4.928	0.04646	Mmp2
-1.075	3.243	0.2638	Ccl12
-1.074	3.792	0.08407	Acadvl
-1.072	3.292	0.1176	Haao
-1.07	5.155	0.05953	Zfp729a
-1.069	4.667	0.03229	Arhgap27os3
-1.068	3.323	0.1493	Dpagt1
-1.067	5.834	0.006847	Igsf8
-1.063	4.257	0.07093	Plk3
-1.06	4.333	0.04235	Slc35b2
-1.058	3.89	0.05754	Acvrl1
-1.058	2.565	0.222	Mrpl45
-1.056	6.027	0.01106	Ubc
-1.056	4.246	0.02934	Tmsb10
-1.056	3.489	0.09039	Ost4
-1.056	2.965	0.1242	Atp5g1
-1.056	3.386	0.2363	Nme1
-1.054	3.97	0.114	Igfbp4
-1.054	3.064	0.1394	Pgpep1
-1.052	3.823	0.06186	Polr1d
-1.048	3.669	0.2431	Tmem208
-1.043	3.282	0.2092	Zbtb24
-1.039	5.257	0.03673	Rpl9
-1.039	5.984	0.1176	Rps11
-1.036	2.701	0.7587	Gem
-1.034	3.582	0.09987	Rbm43
-1.034	3.3	0.1071	Smad6
-1.032	4.083	0.2625	Rpl27
-1.031	4.346	0.04371	Stk38l
-1.031	3.365	0.2802	Gtf3c6
-1.026	3.226	0.1328	Taf13
-1.02	3.808	0.106	Isyna1
-1.019	5.519	0.1407	Rpl22
-1.017	4.579	0.05446	Edf1
-1.016	6.734	0.003309	Actg1
-1.015	5.751	0.7727	Ccr6
-1.014	2.688	0.2012	Toe1
-1.013	3.911	0.06146	Coq10b
-1.009	2.877	0.2423	1700126G02Rik
-1.007	4.036	0.1074	Got1
-1.004	4.513	0.0321	Tmed3
-1.003	3.976	0.1016	Nrbf2
-1.003	3.173	0.2044	Bckdk
-1.002	3.866	0.08407	Zfyve21
-1.001	2.836	0.1868	Ctla2b
-0.9999	6.43	0.1291	Rplp1
-0.9966	3.933	0.1018	2210016F16Rik
-0.9922	2.878	0.2289	Med10
-0.99	2.822	0.2692	Mrps34
-0.9862	6.578	0.01109	Soat1
-0.9855	3.173	0.1623	Ndufb3
-0.9847	4.395	0.06362	Paqr3
-0.983	3.985	0.05896	Esd
-0.9823	3.372	0.136	Tpst1
-0.9811	2.723	0.206	Mphosph6
-0.9747	6.243	0.004984	Gm49342
-0.9732	3.33	0.1797	Pvr
-0.9701	4.577	0.03845	Ramp2
-0.9691	3.265	0.1176	Maged2
-0.9663	3.265	0.1569	Ccdc130
-0.9662	3.34	0.182	Slc30a1
-0.964	3.748	0.1202	Orai3
-0.9639	5.618	0.006778	Gcnt2
-0.9609	4.022	0.2317	Klhdc8b
-0.9595	3.289	0.252	Med4
-0.9577	3.322	0.1847	Oat
-0.9553	4.09	0.09106	Susd1
-0.9545	3.491	0.1679	Trmt112
-0.9533	4.382	0.05402	Rasgrp4
-0.9507	3.66	0.1431	Kcnj10
-0.9475	5.824	0.1662	Tpt1
-0.9471	6.728	0.004413	Rpl21
-0.9467	6.979	0.04635	Il1a
-0.9463	4.489	0.04681	Nectin2
-0.946	2.836	0.5016	Mcm4
-0.9444	4.608	0.07093	Errfi1
-0.942	6.888	0.04681	Rps4x
-0.9419	5.257	0.02475	1700025G04Rik
-0.935	2.72	0.2534	Mthfd2l
-0.9338	5.112	0.04165	Myl12a
-0.9263	4.555	0.05063	Cited2
-0.9257	4.993	0.02934	Bzw2
-0.9236	6.486	0.1448	Rpl18a
-0.9231	4.364	0.2212	Rpl27a
-0.923	2.71	0.3508	Heg1
-0.9219	5.2	0.09632	Rps25
-0.9215	6.551	0.289	Jun
-0.9209	5.79	0.03341	Hspa12a
-0.9207	5.156	0.04347	Calm3
-0.9207	3.545	0.3735	H1f2
-0.9199	4.828	0.09603	Eef1d
-0.9186	5.237	0.07429	Prdx1
-0.9166	3.485	0.2791	Cd2bp2
-0.9145	6.559	0.00417	Ipcef1
-0.9143	5.648	0.05953	Ppp1r10
-0.913	4.611	0.074	Psmd3
-0.9117	3.764	0.2189	Rpl15
-0.9114	2.775	0.2587	Mrps7
-0.9086	2.636	0.3496	Npm3
-0.9085	4.354	0.1189	Slc66a1
-0.9068	3.336	0.1929	Mtrf1l
-0.9034	3.62	0.1576	Gm20721
-0.9028	3.059	0.2647	Mrps14
-0.9013	2.42	0.4373	Snrpg
-0.8984	2.761	0.2747	Tmem256
-0.8973	12.11	0.003309	Cst3
-0.8972	4.542	0.08907	Ran
-0.8962	6.987	0.003443	Tlr13
-0.8957	2.612	0.3456	Zfp105
-0.8944	5.962	0.139	Rps5
-0.8929	5.558	0.07468	Rps12
-0.8928	3.404	0.3791	Tfrc
-0.8913	4.259	0.1394	Rabac1
-0.89	2.985	0.2553	Brca2
-0.8878	3.675	0.1726	AU041133
-0.8862	3.622	0.2194	Ints12
-0.8862	3.842	0.2664	Id2
-0.8848	3.184	0.2926	Jtb
-0.8831	2.937	0.372	Ccr2
-0.8826	6.417	0.01383	Rps3
-0.8825	6.443	0.001645	Hsp90aa1
-0.8814	4.212	0.1246	Vash1
-0.8814	2.748	0.3312	Snu13
-0.8795	3.867	0.2587	Gm15880
-0.8763	3.291	0.3307	2010013B24Rik
-0.8746	3.562	0.1431	Sv2a
-0.8744	4.021	0.1019	Dynll1
-0.8743	4.022	0.114	Get3
-0.8734	6.224	0.03187	Rpl13
-0.8732	3.485	0.4949	Tex14
-0.8726	4.218	0.1283	Masp1
-0.8718	4.854	0.03254	Ube2q1
-0.8683	3.218	0.2895	Tomm22
-0.8681	6.43	0.007527	Naalad2
-0.8677	5.073	0.04359	Prkcsh
-0.8652	3.237	0.4472	Glce
-0.8647	3.341	0.2212	Cycs
-0.8642	5.196	0.04347	Hmgn1
-0.8637	4.614	0.05452	Rpl36
-0.8612	2.943	0.6973	Tnf
-0.8602	5.194	0.02346	Cd302
-0.8602	4.812	0.1048	Jpt1
-0.8596	5.977	0.1506	Rplp0
-0.8595	2.724	0.4114	Mdga2
-0.8585	4.718	0.14	Rps10
-0.8551	7.839	0.002981	Fcgr2b
-0.8515	3.79	0.1487	Atp5o - ENSMUSG00000022956
-0.8509	4.397	0.1378	Pirb
-0.8505	3.661	0.1309	Yeats4
-0.8485	3.511	0.1998	Oaf
-0.8485	3.917	0.2642	Psmb4
-0.8478	5.412	0.02602	Tnfsf13b
-0.8476	3.502	0.1797	Mrpl17
-0.8474	6.353	0.02934	Rpl17
-0.8457	5.219	0.05402	Tuba1b
-0.8433	9.348	0.1865	Filip1l
-0.8431	6.786	0.05515	Coro1a
-0.843	3.175	0.1734	Commd4
-0.843	5.399	0.447	Atf3
-0.8423	4.054	0.14	Ets2
-0.8421	5.739	0.04318	Rps6
-0.8413	3.083	0.4073	Ppp1r14b
-0.8392	3.208	0.3944	Nkain2
-0.839	5.411	0.08194	Rpl31
-0.8361	3.958	0.1173	Serpinf1
-0.8359	4.522	0.09955	Atp6v1f
-0.8355	4.01	0.1312	Grcc10
-0.8344	4.248	0.2394	H2az1
-0.8341	6.164	0.02545	Rpl5
-0.8332	2.987	0.3287	Plpp6
-0.8321	3.886	0.1847	Gm15850
-0.8318	5.725	0.05402	Ppia
-0.8314	3.788	0.1939	Rps6ka4
-0.8299	3.987	0.1743	PTPRG
-0.8296	3.43	0.2299	Fasn
-0.8272	4.392	0.09618	Mmd
-0.8269	4.224	0.107	Eif1b
-0.8264	5.632	0.08821	Sox4
-0.8252	2.907	0.2441	Ndufa1
-0.8251	3.038	0.3329	Abhd17a
-0.8233	3.82	0.3086	Gm37168
-0.821	2.855	0.3686	Cyp51
-0.8208	3.236	0.3719	Arrdc4
-0.8185	3.26	0.222	Eef1e1
-0.8182	3.689	0.1662	Mmgt1
-0.8182	2.636	0.7073	Rsph10b
-0.8178	5.786	0.2481	Rps24
-0.8163	5.493	0.102	Cox4i1
-0.8155	2.564	0.3689	Snip1
-0.8146	6.393	0.02218	Tom1l1
-0.8146	4.435	0.4758	St8sia6
-0.8144	3.573	0.2307	ENSMUSG00000120144
-0.8134	3.581	0.4465	Cpox
-0.8125	5.33	0.1086	Rps26
-0.81	3.33	0.2355	Rdh14
-0.8091	4.253	0.1033	Mtap
-0.8076	3.595	0.2278	Pdzrn4
-0.8066	3.209	0.2202	Txn1
-0.8065	3.458	0.1927	Get4
-0.8055	7.658	0.006844	Atg10
-0.804	5.154	0.08115	Irf2bpl
-0.8018	3.217	0.2673	Smagp
-0.8011	4.674	0.194	Epha2
-0.8009	3.493	0.236	Blm
-0.8008	2.881	0.3606	Jrkl
-0.8007	3.285	0.2269	Pebp1
-0.799	5.442	0.06058	Tmpo
-0.799	3.063	0.2276	Lekr1
-0.7983	5.875	0.04039	Ccl6
-0.7979	6.014	0.1405	Rpl32
-0.7969	3.49	0.2221	1810009A15Rik
-0.7961	3.945	0.215	2410002F23Rik
-0.7956	4.041	0.2012	Nmd3
-0.7946	3.136	0.4073	Gm34408
-0.794	4.561	0.1176	Galnt4
-0.7936	7.956	0.03254	Rin2
-0.7932	4.938	0.2212	Tmem176a
-0.7912	5.821	0.1427	Spred2
-0.7898	4.181	0.3546	Atrnl1
-0.7898	3.362	0.3601	Ccdc15
-0.7896	3.251	0.2438	Smim29
-0.7895	4.709	0.1016	Psmc5
-0.7865	4.029	0.1518	Gng5
-0.786	3.92	0.1998	Dhrs7
-0.7853	5.206	0.0777	Lfng
-0.7851	4.266	0.1309	Actl6a
-0.7851	3.225	0.3224	Pdcd6
-0.7815	2.838	0.4516	Arhgap19
-0.7798	8.203	0.07952	Hspa5
-0.779	2.669	0.4393	Vkorc1
-0.7782	3.667	0.3548	Gm44710
-0.7779	4.126	0.1928	Gsdme
-0.7758	4.713	0.1067	Lbh
-0.7757	5.748	0.04165	Rps27
-0.7756	3.16	0.3396	Nop10
-0.773	3.455	0.2439	Ttbk2
-0.772	4.885	0.117	Gm21988
-0.7719	8.052	0.004984	Tnfrsf21
-0.7719	5.841	0.04202	Fam111a
-0.7705	6.094	0.03204	Bcl2
-0.7686	4.123	0.1438	Gabarapl1
-0.7684	5.738	0.7473	Gm12865
-0.7659	3.804	0.3556	Wdr46
-0.7654	3.913	0.1756	Htatsf1
-0.765	3.32	0.2354	Slc25a1
-0.7648	3.766	0.2097	Cstb
-0.7646	5.664	0.07821	Rpl19
-0.7644	4.382	0.2438	ENSMUSG00000120081
-0.7622	6.505	0.08825	Eprs
-0.7622	3.691	0.2039	Nupl2
-0.7617	6.883	0.02585	Gpr183
-0.7604	5.168	0.1071	Nod1
-0.7589	3.633	0.211	Pofut2
-0.7573	4.345	0.1874	Hmga2-ps1
-0.7573	3.75	0.2418	Hint1
-0.7572	6.839	0.06058	Alox5ap
-0.7561	10.24	0.144	C1qa
-0.7558	2.746	0.4191	Bet1l
-0.7548	6.092	0.0144	Gngt2
-0.7525	3.476	0.3095	Cox5a
-0.7524	5.028	0.1864	Rps21
-0.7518	8.183	0.7103	Rn7sk
-0.7514	3.847	0.181	Qdpr
-0.7513	5.713	0.0844	Lypd6
-0.751	5.52	0.139	Fuca2
-0.7507	4.944	0.121	Oaz1
-0.75	4.442	0.1431	Klhl25
-0.7497	4.471	0.2218	Smim3
-0.7488	3.395	0.2199	Wdr83os
-0.7466	7.336	0.00757	Tspan7
-0.7466	6.87	0.07435	P4hb
-0.7465	5.974	0.1206	Ganab
-0.7463	5.127	0.0686	Rps17
-0.746	2.709	0.3869	Ubiad1
-0.7449	3.866	0.2212	Ech1
-0.7445	3.393	0.4791	0610010K14Rik
-0.7443	5.348	0.0321	Cldnd1
-0.7443	4.924	0.1071	Fcgrt
-0.7423	4.035	0.2413	Mydgf
-0.7416	3.948	0.2097	Srp9
-0.7393	3.803	0.5164	Syt6
-0.7392	5.529	0.06335	Rpl6
-0.7384	3.375	0.2365	Atp5md
-0.7377	7.997	0.04371	Ssbp2
-0.7369	3.232	0.3803	Septin6
-0.7368	3.666	0.2251	Etfb
-0.736	3.693	0.3134	Fam8a1
-0.7358	3.722	0.2983	Trmt10a
-0.7357	6.884	0.01858	Etv5
-0.7351	2.718	0.452	Dnajc9
-0.7347	3.896	0.3105	Pxdc1
-0.7346	5.297	0.2826	Creb5
-0.7338	4.483	0.2438	Myh10
-0.7338	3.19	0.2747	Snrpd1
-0.7317	3.203	0.4191	Txnl4a
-0.7316	6.321	0.02542	Ccnd1
-0.7315	3.306	0.4039	Lmtk2
-0.7313	2.458	0.4912	Pmvk
-0.7307	6.49	0.02025	Fads1
-0.7307	4.832	0.1016	Rpl18
-0.7291	4.189	0.2199	Eps8
-0.7287	3.021	0.354	Vopp1
-0.7284	5.384	0.08904	Atp6v0e
-0.7283	5.248	0.04558	Mlf2
-0.7276	4.635	0.1176	Cbx4
-0.7267	10.28	0.0007876	Tmsb4x
-0.7267	5.902	0.1816	Rpl8
-0.7266	5.024	0.1044	Pcna
-0.7262	6.246	0.02421	Flna
-0.7255	4.413	0.1705	Pqbp1
-0.7245	6.091	0.02848	Tmx4
-0.7243	3.097	0.3342	Plxna4os1
-0.724	5.897	0.06058	Csnk1g3
-0.724	2.481	0.4528	Eaf2
-0.7238	5.288	0.1173	Ssrp1
-0.7234	4.738	0.1238	Ahsa1
-0.7232	3.463	0.3481	Mogs
-0.7228	3.275	0.2491	Gzf1
-0.7221	5.666	0.4529	Rgs1
-0.7216	6.058	0.1075	Rack1
-0.7216	3.613	0.294	Peg10
-0.7214	6.909	0.01359	Myo1b
-0.721	5.085	0.06389	Spint1
-0.72	9.201	0.001064	Rnase4
-0.7199	3.92	0.24	Slamf9
-0.7194	5.511	0.3668	Rbpms
-0.7181	6.115	0.1777	Rps29
-0.7165	5.684	0.04039	Ctbp1
-0.7153	3.16	0.5252	Dipk2a
-0.7148	5.341	0.04794	Tspan3
-0.7145	3.129	0.4324	Mpc2
-0.714	5.119	0.1534	Rpl35
-0.714	9.353	0.2553	Eef1a1
-0.7132	3.875	0.3728	Csf1
-0.7126	3.183	0.3637	Ptp4a1 - ENSMUSG00000026064
-0.7122	3.506	0.3028	2310022B05Rik
-0.7121	6.142	0.03195	Ptbp1
-0.712	5.684	0.06974	Cct8
-0.7114	6.436	0.2452	Rps8
-0.7112	6.005	0.1179	Rpl26
-0.7102	8.198	0.05953	Bank1
-0.7081	17.06	0.0144	Rn18s-rs5
-0.7076	5.44	0.1176	Prune2
-0.707	5.278	0.04681	Leprotl1
-0.707	5.868	0.1971	Rpl41
-0.707	4.503	0.2715	Prcc
-0.7065	3.853	0.2522	Dok1
-0.7053	4.464	0.1662	Rbm42
-0.7046	2.798	0.3963	Pdlim2
-0.704	5.983	0.1734	Rps27a
-0.7039	4.998	0.4358	Nfkbiz
-0.7038	3.547	0.3312	Txndc17
-0.7034	4.533	0.1139	Cdk4
-0.703	7.745	0.00675	Tyrobp
-0.7029	4.013	0.2039	Sf3b6
-0.7021	3.383	0.304	Cox5b
-0.7012	6.246	0.028	Tgm2
-0.7	4.877	0.1518	Myd88
-0.6998	3.478	0.3016	Uqcc2
-0.6989	3.955	0.2584	Pdcl
-0.6976	5.821	0.04318	Arpc3
-0.6976	4.061	0.2219	Lamtor4
-0.6968	3.911	0.2613	Ube2m
-0.696	5.252	0.1334	Rps15
-0.6958	7.25	0.04646	Pea15a
-0.6954	4.582	0.1226	Otub1
-0.6949	2.882	0.3396	Zfp458
-0.6948	2.855	0.3848	Zbtb8os
-0.6942	3.193	0.4758	Ndufa8
-0.6941	5.052	0.114	Rer1
-0.6937	2.652	0.4507	Siah2
-0.693	4.482	0.1378	Gpx4
-0.6926	5.384	0.1233	Txnrd1
-0.692	6.248	0.0321	Naca
-0.6918	3.279	0.2791	Lmf2
-0.6909	4.748	0.1615	Rpl38
-0.6904	4.418	0.195	Cstf2
-0.6902	4.55	0.2159	Eloc
-0.6897	3.562	0.2725	Cenpp
-0.6889	6.184	0.02485	Tmem86a
-0.6885	3.629	0.2628	Usp39
-0.6882	5.268	0.07821	Gm49368
-0.6876	3.172	0.2638	Arl2bp
-0.6866	6.965	0.02485	Ogfrl1
-0.6862	6.852	0.0705	Rpl13a
-0.6855	4.22	0.2515	Hsdl1
-0.684	4.68	0.1176	Park7
-0.6839	7.751	0.009274	Gcnt1
-0.6818	5.057	0.07153	Lamtor1
-0.681	3.431	0.2673	Trim21
-0.6797	2.864	0.5019	Hus1
-0.6795	4.619	0.2012	Prdx5
-0.6793	3.036	0.3325	Ndufc1
-0.6788	4.877	0.1569	Rps16
-0.6787	3.988	0.3068	Chchd2
-0.6787	2.98	0.5057	Pdzd11
-0.6776	5.385	0.1438	Ppib
-0.6774	4.5	0.1208	Rnh1
-0.6768	6.839	0.01716	Prpf8
-0.6768	5.196	0.07369	Uqcrc2
-0.6766	5.084	0.1496	Pigt
-0.6765	6.165	0.04347	Lman1
-0.6761	4.732	0.1662	Usp5
-0.6761	3.7	0.2608	Pnpo
-0.6755	3.113	0.3005	Gm13563
-0.6753	9.835	0.3188	Il31ra
-0.6744	4.036	0.2762	Pus7
-0.6734	6.982	0.007685	Commd8
-0.6733	3.697	0.2692	Xrcc6
-0.6728	4.866	0.1742	Apobr
-0.6727	5.712	0.2962	Rps7
-0.6716	4.445	0.2107	Cdk5rap3
-0.6714	3.435	0.4233	Cfap418
-0.6713	5.18	0.1847	Eef1b2
-0.6708	4.004	0.3928	Bcl2l13
-0.6705	4.121	0.3132	Cntln
-0.6689	4.204	0.2507	Tmx2
-0.6687	2.869	0.4161	Gm4221
-0.6676	7.418	0.04235	Calm1
-0.6674	4.96	0.2067	Ldha
-0.6674	3.802	0.404	Ndufa4
-0.6672	6.776	0.2254	Dusp6
-0.6667	5.653	0.08629	Dusp16
-0.666	4.197	0.2174	Tfip11
-0.6647	4.849	0.1847	Morrbid
-0.6646	4.965	0.1683	Sptssa
-0.6646	3.322	0.2707	Tsen15
-0.6645	3.089	0.6957	2610307P16Rik
-0.6643	5.454	0.2906	Plekho2
-0.6641	3.004	0.5028	Zfp316
-0.6636	4.275	0.2419	B4galt3
-0.6635	5.37	0.1067	Ppm1g
-0.6625	2.933	0.3808	Odc1
-0.6623	2.956	0.475	Raet1e
-0.6619	6.222	0.2983	Rpl14
-0.6616	5.643	0.1039	Manf
-0.6614	4.025	0.2308	Lin54
-0.6614	5.424	0.2806	Dennd2c
-0.661	4.353	0.25	H1f0
-0.6609	5.321	0.2148	Rps19
-0.6608	3.929	0.2012	Cyc1
-0.66	6.942	0.01119	Arf1
-0.6573	3.286	0.3464	Bend3
-0.6568	2.766	0.4761	Tdg
-0.6558	14.84	0.1847	Cmss1
-0.6547	3.797	0.2931	Vegfb
-0.6522	3.361	0.3672	Chrac1
-0.6513	3.046	0.4131	Tmcc3os
-0.6509	4.162	0.2452	Fam220a - ENSMUSG00000083012
-0.6505	4.761	0.1233	Sar1b
-0.65	6.026	0.06058	Lat2
-0.6497	6.685	0.01569	Bhlhe41
-0.6466	3.125	0.4672	Rundc1
-0.6457	4.71	0.161	Smim15
-0.6457	4.04	0.2633	Arhgap29
-0.6445	4.557	0.491	Ppp1r15a
-0.6434	6.779	0.1067	Sdf4
-0.6423	6.63	0.129	Akr1a1
-0.6423	5.523	0.1309	Junb
-0.6421	2.986	0.3697	Zfand1
-0.6399	5.231	0.107	Nagpa
-0.6397	5.326	0.06335	Glod4
-0.639	3.507	0.3672	Slc25a39
-0.6381	5.26	0.2308	Rpl34
-0.6381	3.274	0.3564	Dck
-0.6375	9.185	0.01982	Hsp90b1
-0.6365	4.394	0.2381	Atxn7l3
-0.6353	3.38	0.3437	Rab9
-0.6347	4.428	0.1724	Nfkbib
-0.634	4.18	0.3459	Ckap4
-0.6338	5.124	0.1176	Trim28
-0.6337	6.235	0.0766	Slc25a5
-0.6337	5.428	0.09603	Tspan31
-0.6336	3.629	0.4085	Klf2
-0.6329	4.926	0.621	Cass4
-0.632	4.324	0.1506	Elovl1
-0.6319	2.658	0.499	Trdmt1
-0.6312	3.299	0.3358	Ddah2
-0.6307	2.952	0.4077	Timm17a
-0.6306	6.872	0.01403	Tspan13
-0.6303	5.895	0.1065	Mtpn
-0.6296	5.654	0.06529	Coro1c
-0.629	2.947	0.3751	Spata5l1
-0.6287	6.598	0.02475	Mapre1
-0.6286	7.25	0.01716	Cd68
-0.6285	3.909	0.2423	Cdipt
-0.6283	8.539	0.07488	Calr
-0.6273	4.854	0.3725	Rpl36a
-0.6263	3.04	0.4258	Mea1
-0.6258	3.161	0.4192	Banf1
-0.6254	5.469	0.06112	Ier5
-0.625	3.426	0.3409	Nubp2
-0.6248	5.632	0.09618	Zdhhc5
-0.6231	6.36	0.3344	Srgn
-0.6223	6.574	0.05669	Plod1
-0.6223	3.23	0.3892	Agbl5
-0.6221	3.193	0.5864	Mcm2
-0.6211	3.679	0.4524	Prdx2
-0.621	11.81	0.2385	Gphn
-0.6206	4.24	0.2762	Ciao2a
-0.6203	6.527	0.114	Gas6
-0.62	4.491	0.1378	Mccc2
-0.6189	2.866	0.5809	Ap1g2
-0.6184	3.824	0.4002	Alyref
-0.6182	5.091	0.1034	Emc7
-0.6182	5.585	0.1312	Nudt4
-0.6178	4.884	0.1685	Mtfr1l
-0.6176	5.446	0.1039	Ppp1ca
-0.6175	5.57	0.05526	Mid1ip1
-0.617	3.937	0.2535	Zdhhc7
-0.616	3.457	0.3481	Elob
-0.6159	9.191	0.001403	P2ry13
-0.6157	3.953	0.3596	Psmb3
-0.6154	4.387	0.3396	Nme2
-0.615	4.88	0.1569	Sh3bp5
-0.6147	3.681	0.347	2310033P09Rik
-0.614	4.843	0.2734	Rpl28
-0.6138	8.34	0.01164	Gnas
-0.6126	3.615	0.3777	Cebpd
-0.6121	5.12	0.1195	Pnp
-0.6121	4.647	0.1431	Inppl1
-0.6117	4.816	0.1479	Pdha1
-0.6117	2.921	0.3812	Fahd2a
-0.6109	3.565	0.3565	Commd6
-0.6107	4.558	0.2317	Tprgl
-0.6107	2.672	0.6134	Gm36963
-0.61	5.304	0.2679	Map3k20
-0.6095	3.918	0.2451	Tesk1
-0.6095	3.954	0.3033	Ssr2
-0.6087	7.013	0.09085	Pdia6
-0.608	3.544	0.3142	P3h3
-0.6077	7.983	0.06942	Ftl1
-0.6073	5.663	0.07435	Nras
-0.6072	4.025	0.3962	Gm15441
-0.6072	2.771	0.4941	Tceal1
-0.6069	5.328	0.1078	Csf2rb2
-0.6068	4	0.3684	Ctdspl
-0.6066	3.299	0.3974	Blzf1
-0.6056	3.616	0.2762	Ring1
-0.6048	3.84	0.3543	Ms4a6c
-0.6046	5.747	0.1359	Rps14
-0.6045	3.013	0.4347	Nudt16
-0.6042	4.499	0.2679	Bcl6
-0.604	7.355	0.04529	Aif1
-0.604	2.74	0.4785	Btg3
-0.6037	6.452	0.05692	Hnrnpab
-0.6031	5.369	0.1847	Cct2
-0.6031	3.871	0.2694	Nup210
-0.603	2.974	0.5015	2410004B18Rik
-0.603	3.019	0.5026	Cdkn2aip
-0.6029	5.779	0.09203	Tmed9
-0.6027	4.358	0.3059	Glo1
-0.6026	3.045	0.4002	Ptprcap
-0.6024	3.968	0.2664	Fut11
-0.6012	3.871	0.5111	Abca2
-0.601	2.704	0.5608	Capg
-0.6009	7.135	0.04347	Tspan18
-0.5998	5.189	0.1252	Arf6
-0.5997	5.98	0.1176	Rpl37
-0.5994	4.238	0.2219	Zc3h12a
-0.5987	5.069	0.1291	Zfp518a
-0.5987	4.663	0.1576	Emc10
-0.5985	6.618	0.114	Rps23
-0.5978	2.814	0.4462	Uqcr10
-0.5974	5.698	0.4503	Amotl1
-0.597	5.948	0.06058	Skp1
-0.597	3.718	0.3502	Gm45894
-0.5968	2.763	0.4718	Slc25a33
-0.5963	6.392	0.08884	Set
-0.5959	2.882	0.5589	Gm12861
-0.5957	5.472	0.06642	Endod1
-0.5957	3.658	0.5081	Gm48614
-0.5942	4.625	0.1553	Rbx1
-0.5942	4.34	0.2312	Atp5j
-0.5941	5.353	0.143	Rpl24
-0.594	4.941	0.2212	Hrh2
-0.5939	3.844	0.3005	Sod1
-0.5922	3.187	0.4492	Pde12
-0.5921	8.069	0.05882	Hspa8
-0.5914	3.722	0.3732	Zfp386
-0.5909	6.098	0.08825	Rpl10
-0.5904	3.571	0.3624	Neo1
-0.5901	9.072	0.144	Pdia3
-0.5901	4.131	0.3095	Socs3
-0.5898	3.956	0.3608	Mtrfr
-0.5897	5.363	0.1092	Jund
-0.5885	5.035	0.2205	Fkbp4
-0.5883	6.281	0.04691	Vdac2
-0.5873	5.953	0.1325	Btg2
-0.5873	4.153	0.2875	Jkamp
-0.5869	4.062	0.298	Dnajc25
-0.5868	2.659	0.5554	Gm16386
-0.5865	6.932	0.02848	Wdr1
-0.5854	3.788	0.3382	Cuta
-0.5837	3.906	0.5341	Pck2
-0.5836	5.322	0.2933	Rps15a
-0.5835	4.344	0.7553	Il7r
-0.5831	4.273	0.2694	Enoph1
-0.5831	4.118	0.2734	Gm47469
-0.5829	3.207	0.4601	Ssx2ip
-0.5826	3.531	0.3803	Trappc4
-0.5825	3.507	0.3522	Rpl36al
-0.5825	3.296	0.481	Ampd2
-0.5821	4.171	0.3202	Rtp4
-0.5818	5.912	0.161	Nt5dc1
-0.5815	6.086	0.1048	Eif5a
-0.581	7.987	0.0107	Rhoa
-0.5804	4.49	0.4722	Tlr5
-0.5801	3.018	0.4233	Hsd3b7
-0.5791	6.507	0.05402	Evi2a
-0.5789	4.869	0.1562	Atf4
-0.5787	2.817	0.5462	4933433G15Rik
-0.5785	4.104	0.4065	Afap1
-0.5785	3.428	0.5341	Gm48678
-0.5773	4.267	0.3095	Fam234b
-0.5768	6.753	0.0321	M6pr
-0.5766	5.125	0.2031	Syf2
-0.5764	6.899	0.2044	Rps9
-0.576	2.829	0.5203	Alms1
-0.5758	3.287	0.4374	Wdr6
-0.5757	3.253	0.3747	Kctd10
-0.5756	3.454	0.4161	Arl6ip4
-0.5751	5.075	0.262	Rps20
-0.5751	5.397	0.2641	Dcp2
-0.5745	2.978	0.4944	Trim32
-0.5744	4.653	0.2289	Man2c1
-0.5736	4.24	0.2509	Arpc5l
-0.5733	3.994	0.3672	ENSMUSG00000120309
-0.5731	2.851	0.5245	Fam122a
-0.5722	4.592	0.2585	Cox6a1
-0.5707	2.792	0.5348	Snupn
-0.5699	3.187	0.4554	Tut1
-0.5699	3.43	0.5391	Pex5
-0.5698	7.487	0.04612	Ptms
-0.5692	6.481	0.05306	Tubb5
-0.5692	4.066	0.3095	Psmb6
-0.5685	3.129	0.4249	Svbp
-0.568	8.107	0.009846	Adgre1
-0.5675	5.634	0.07474	9530068E07Rik
-0.5667	3.814	0.3683	Rfk
-0.5665	2.807	0.4642	Gm46411
-0.5664	3.396	0.559	Rmdn3
-0.5661	3.645	0.3339	Fkrp
-0.5658	4.593	0.365	Nop53
-0.5647	5.623	0.2155	Mybbp1a
-0.5647	4.362	0.3556	Anxa4
-0.5644	5.349	0.1662	Morf4l2
-0.5634	8.762	0.04051	Cables1
-0.563	5.183	0.1874	Emc1
-0.5629	4.932	0.1649	Tmed4
-0.5625	3.677	0.3268	Chmp6
-0.5625	3.174	0.4653	Ap5b1
-0.5618	3.723	0.3785	Krtcap2
-0.561	7.295	0.03287	Sdcbp
-0.5607	3.601	0.3944	Mmadhc
-0.5603	4.996	0.1746	Ppp2r1b
-0.5603	5.526	0.1778	Kxd1
-0.5599	4.03	0.2648	Med24
-0.5599	2.867	0.5664	Psmd10
-0.5594	3.361	0.3735	Eif6
-0.5586	4.842	0.2031	Kdelr2
-0.5582	6.835	0.03555	Fcgr1
-0.5582	5.849	0.1825	Furin
-0.5573	3.288	0.4287	Ndufb11
-0.5566	4.733	0.2459	Mthfd1
-0.5564	4.942	0.2452	Rpl30
-0.5556	4.566	0.2771	Gde1
-0.5553	7.1	0.03448	Arpc1b
-0.555	4.789	0.2653	Slc7a5
-0.5545	4.431	0.2298	Dhx33
-0.5544	4.638	0.2143	Bub3
-0.5536	3.497	0.3519	Cdk2ap2
-0.5534	5.638	0.2479	Hspd1
-0.5533	3.141	0.4602	Alkbh6
-0.5523	5.136	0.1179	Slc25a4
-0.5521	4.478	0.2973	Rft1
-0.5521	3.242	0.4551	Pcdhgb4
-0.5518	3.898	0.321	Ndufa13
-0.5514	3.78	0.3526	Pgm2
-0.5506	4.107	0.2973	Imp4
-0.5505	6.016	0.08825	Wdfy1
-0.5503	5.125	0.1378	Denr
-0.5495	6.521	0.04202	Reep5
-0.5493	4.227	0.3029	Mcrip1
-0.5479	6.745	0.1411	Arl4c
-0.5478	5.327	0.2567	Limk1
-0.5475	2.456	0.6449	Tpgs1
-0.5473	5.057	0.1463	Myadm
-0.5473	2.966	0.4539	Lrrc1
-0.5468	5.659	0.2039	Rpl7a
-0.5468	3.664	0.3717	Zfp622
-0.5467	5.59	0.1005	Lap3
-0.5466	7.518	0.03269	Pfn1
-0.5465	4.14	0.3924	Atic
-0.5464	3.62	0.6126	Usp50
-0.5462	6.796	0.04202	Gng10
-0.5462	4.955	0.198	Dynlt3
-0.5447	4.685	0.2585	Chmp2a
-0.5445	3.632	0.4442	Psen2
-0.5444	4.571	0.2107	Zfp513
-0.5442	9.093	0.0213	Canx
-0.5441	11.55	0.1295	Ctss
-0.544	6.864	0.1056	Ybx1
-0.544	5.148	0.1748	Psma7
-0.5436	4.663	0.2155	Tmem100
-0.543	3.2	0.4507	ENSMUSG00000121479
-0.5427	10.74	0.003847	Sparc
-0.5426	3.449	0.5808	Ddx39a
-0.5422	7.267	0.03254	Arl6ip1
-0.5422	7.655	0.262	Rpl4
-0.5417	4.852	0.2438	Psmd8
-0.5413	11.64	0.002981	Actb
-0.5405	7.578	0.04691	Arhgdia
-0.5403	5.242	0.1352	Ctnnbip1
-0.5399	2.872	0.4683	Ptrh2
-0.5393	6.562	0.07369	Ghitm
-0.5391	5.81	0.1091	Dstn
-0.539	6.017	0.1087	Limd2
-0.5386	6.22	0.06256	Syngr2
-0.5386	3.393	0.4529	Gpr137
-0.5382	3.153	0.5341	Cnpy4
-0.538	5.223	0.1794	Slc39a7
-0.5377	9.968	0.004413	Tmem119
-0.5374	4.901	0.2761	Pfdn5
-0.537	3.244	0.5535	Taf10
-0.5368	3.784	0.3522	Bax
-0.5367	7.836	0.04894	Cfl1
-0.5366	5.796	0.1873	Rpl7
-0.5364	2.864	0.5064	4833418N02Rik
-0.5351	3.623	0.3803	Rpp14
-0.5348	4.683	0.2316	Arhgap9
-0.5347	4.621	0.2771	Dld
-0.5345	5.352	0.22	Stk17b
-0.534	6.129	0.1365	Rplp2
-0.5334	3.15	0.5299	Psmg2
-0.5325	3.685	0.4009	Akr1b3
-0.5323	5.662	0.1179	Sec61a1
-0.532	5.434	0.1179	Tlr9
-0.5315	7.243	0.1227	Bcl2l1
-0.5311	4.054	0.3103	Pdrg1
-0.5307	5.188	0.2452	Rps13
-0.5306	5.029	0.3152	Nsun6
-0.5306	3.139	0.4509	Gyg
-0.5305	5.121	0.4104	Rpl35a
-0.5297	2.808	0.5915	Men1
-0.5295	4.654	0.5447	Lrguk
-0.5287	3.278	0.4346	Wdr89
-0.5287	2.779	0.6169	Zscan22
-0.5285	5.212	0.254	Cct5
-0.5283	3.215	0.4304	Ptpmt1
-0.5282	5.625	0.4832	Rpsa
-0.5281	3.331	0.447	Atp5e
-0.5279	6.238	0.1173	Sfi1
-0.5276	4.326	0.2881	Cox6c
-0.5269	5.226	0.1852	Spns2
-0.5268	3.086	0.502	Fbxo30
-0.5266	4.706	0.2254	Drap1
-0.5265	4.235	0.333	Hdhd2
-0.5262	3.584	0.4949	ENSMUSG00000121207
-0.526	5.135	0.207	Aldh3a2
-0.5254	6.927	0.1997	Rpl3
-0.5252	5.338	0.2193	Bcl2a1b
-0.5252	4.514	0.354	Rpl39
-0.5248	4.44	0.2834	Ltbr
-0.5239	7.426	0.03528	Kpna1
-0.5238	8.485	0.3541	Pabpc1
-0.5234	3.392	0.7249	Ripor2
-0.523	4.615	0.4351	Golt1b
-0.5229	5.525	0.1179	Pycard
-0.5226	7.155	0.06058	Laptm4a
-0.5213	4.166	0.4016	Ddx27
-0.5212	3.767	0.4228	Gm54867
-0.5211	4.788	0.2988	Prpf19
-0.5204	8.389	0.231	Kcnma1
-0.5203	5.033	0.2063	Pygb
-0.5194	8.619	0.006778	Ccr5
-0.5192	7.547	0.02887	Ppt1
-0.5187	6.486	0.0568	Mapkapk2
-0.5187	3.744	0.3767	Ubl4a
-0.5184	3.205	0.4998	Shmt2
-0.5183	4.107	0.3027	Tlr12
-0.5181	3.528	0.4594	Snrpa1
-0.518	4.519	0.2522	Ifi27
-0.518	3.674	0.3836	Get1
-0.5174	5.76	0.1176	Tlr3
-0.5172	4.783	0.2039	Naa20
-0.517	3.862	0.4909	Gm20186
-0.5167	10.78	0.02432	P2ry12
-0.5166	4.947	0.1771	Fhad1
-0.516	4.153	0.304	Isca1
-0.5158	6.197	0.07604	Magi3
-0.5152	2.574	0.6452	Slc25a53
-0.5151	3.988	0.3565	Psenen
-0.5149	2.927	0.5026	Ermap
-0.5148	3.111	0.4621	Bri3bp
-0.5147	4.052	0.3717	Cnot9
-0.5146	3.832	0.515	Eif3i
-0.5145	3.047	0.5196	Prdx6
-0.5144	4.087	0.3095	Hexim1
-0.5138	3.894	0.3565	Chmp7
-0.5136	4.47	0.327	Gtf2f1
-0.5135	4.85	0.2057	Kdelr1
-0.5134	5.904	0.1309	Dnajb11
-0.513	3.493	0.5196	ENSMUSG00000120863
-0.5123	5.012	0.2026	Stxbp4
-0.5122	4.602	0.2347	Adh5
-0.5122	3.241	0.502	Nenf
-0.512	3.244	0.5013	Emc6
-0.5117	5.211	0.2226	Myo1c
-0.5117	3.802	0.3528	Rraga
-0.5117	3.153	0.481	Tlnrd1
-0.5115	4.698	0.2439	Spg21
-0.5114	4.16	0.3717	Tsen2
-0.5113	6.562	0.09955	Ckb
-0.5113	3.717	0.3974	Ubr7
-0.5113	2.747	0.5392	1810037I17Rik
-0.511	5.104	0.2126	Spty2d1
-0.5101	5.857	0.2133	Hspa9
-0.5101	3.538	0.4678	C1galt1c1
-0.5101	5.827	0.5846	Fmn1
-0.5096	3.542	0.4402	Rpf2
-0.5095	4.636	0.2411	Tor4a
-0.5088	6.431	0.1071	Ubb
-0.5086	5.312	0.2802	Mknk2
-0.5079	7.121	0.04693	Ndfip1
-0.5073	4.47	0.2886	BC028528
-0.5072	3.916	0.3682	Eid1
-0.5068	6.389	0.0705	Zbtb18
-0.5064	4.752	0.2459	Trappc3
-0.5054	3.754	0.4848	Srm
-0.5043	4.307	0.386	Gfm1
-0.5042	2.878	0.5871	Lsm8
-0.5034	6.445	0.1553	Pdia4
-0.5033	4.104	0.3609	Kat2a
-0.5032	4.33	0.3791	H2-Ob
-0.5031	5.337	0.1676	Ergic3
-0.5027	5.055	0.2611	Psme2
-0.5026	5.528	0.1279	Api5
-0.5026	5.898	0.1316	Nfe2l1
-0.5025	3.077	0.5935	Haus7
-0.502	6.443	0.2286	Rpl23
-0.5014	3.839	0.4683	2810013P06Rik
-0.5009	7.788	0.04796	Slc15a3
-0.5008	2.867	0.5064	Cln6
-0.5006	4.824	0.2143	Cybc1
-0.5003	4.017	0.3717	Arfgap3
-0.5003	3.329	0.5203	Gm21974
-0.5001	4.519	0.2835	Vps26b
-0.4998	3.8	0.5923	Gpm6b
-0.4996	6.382	0.07093	Eloa
-0.4991	3.509	0.6167	Pde4a
-0.4981	7.253	0.04609	Samsn1
-0.4977	4.226	0.3624	P2ry10b
-0.4975	9.332	0.02362	Plek
-0.4975	5.512	0.1539	Bag6
-0.4971	5.394	0.2164	Mdh1
-0.497	8.305	0.2522	Eef2
-0.4966	6.6	0.1226	Slc38a10
-0.496	3.224	0.5064	Senp8
-0.4957	4.041	0.4223	Usp1
-0.4954	3.141	0.4653	Trnau1ap
-0.4953	3.966	0.451	Nudt16l1
-0.4952	2.972	0.6092	Gm9949
-0.4944	2.905	0.5484	Coa3
-0.4939	6.289	0.07981	Copb1
-0.4931	4.632	0.3624	Dhx38
-0.4929	7.088	0.05491	Slc4a7
-0.4929	7.883	0.1016	Slc2a5
-0.4927	9.836	0.4324	Mir6236
-0.4923	3.979	0.4608	Phax
-0.492	3.24	0.536	R74862
-0.4916	4.103	0.4832	Adpgk
-0.4916	2.654	0.6231	Kalrn
-0.4912	3.441	0.4656	Lrrc61
-0.4907	4.021	0.445	Ntan1
-0.4906	2.95	0.5363	Fam98c
-0.49	4.251	0.3661	Bap1
-0.489	7.062	0.05385	Ywhab
-0.4884	4.675	0.372	Cox8a
-0.4879	4.401	0.3445	Prmt1
-0.4875	5.765	0.2012	Ipo5
-0.4874	4.954	0.3556	Ranbp1
-0.4874	4.058	0.3747	Poglut1
-0.4869	6.294	0.1227	Pdk1
-0.4864	3.43	0.6069	1700001C19Rik
-0.4862	6.833	0.0568	Ldhb
-0.4859	3.573	0.4462	Uqcr11
-0.4859	3.275	0.5176	Wscd1
-0.4856	5.527	0.1833	Micos10
-0.4855	6.188	0.2386	Rpn1
-0.4852	5.997	0.1448	Uhmk1
-0.485	3.338	0.6041	Eme2
-0.4849	3.376	0.5612	Osm
-0.4848	4.141	0.338	Slc35a4
-0.4847	3.57	0.4568	Extl2
-0.4846	3.546	0.447	Lig3
-0.4845	2.943	0.5376	Eif4ebp1
-0.4844	5.375	0.1833	Tpbgl
-0.4826	5.553	0.2177	Atp5pb
-0.482	5.334	0.183	Zfp646
-0.482	5.731	0.3042	Pgd
-0.4818	3.008	0.6069	Agbl3
-0.4812	5.438	0.257	Irak1
-0.481	8.084	0.02303	Arpc2
-0.481	4.789	0.231	Fem1c
-0.481	11.68	0.4539	Camk1d
-0.481	3.456	0.5367	Nrde2
-0.4809	3.17	0.745	Pno1
-0.4808	3.896	0.4472	Mcm6
-0.48	4.753	0.255	Taf12
-0.4797	3.391	0.4387	Ccdc43
-0.4796	4.626	0.327	Cetn3
-0.479	7.157	0.04894	Spred1
-0.4789	4.083	0.445	Chmp1a
-0.4785	4.397	0.3598	Slc4a2
-0.4781	5.249	0.2385	Vdac1
-0.478	3.33	0.4871	Oxsm
-0.4777	2.784	0.6737	A930024E05Rik
-0.4774	4.969	0.2536	Chmp5
-0.4774	3.358	0.6335	Polr2g
-0.4773	5.083	0.19	Sema4c
-0.4773	3.23	0.4803	Cox14
-0.4765	6.177	0.1743	Mfsd1
-0.4765	3.987	0.3496	Homer1
-0.4764	5.506	0.1937	Tmem168
-0.4763	4.841	0.4152	Cxcl16
-0.476	8.379	0.22	Hsp90ab1
-0.4759	3.878	0.3881	Klhl11
-0.4757	3.251	0.6587	Rps27l
-0.4754	7.282	0.04681	Ttyh3
-0.4751	3.337	0.5538	Ndufs7
-0.4748	5.65	0.1618	Sub1
-0.4745	3.674	0.4949	Batf3
-0.4743	5.184	0.2363	Slu7
-0.4739	7.667	0.04653	Itm2c
-0.4739	3.774	0.4192	Ube2o
-0.4737	3.8	0.419	Mrpl42
-0.4735	3.143	0.5462	Oprm1
-0.4734	5.287	0.2205	Snap29
-0.473	3.22	0.5171	Nelfe
-0.4728	6.676	0.07731	Sowahc
-0.4728	4.014	0.4136	Nifk
-0.4726	7.915	0.04796	Ctsc
-0.4726	4.071	0.3501	Sfxn1
-0.4724	4.234	0.4645	Osgep
-0.472	5.073	0.1997	Adss
-0.4719	4.31	0.3732	Zfp81
-0.4718	8.378	0.04894	Fcgr3
-0.4715	4.797	0.304	Ostc
-0.4711	5.335	0.3709	Epb41l3
-0.471	5.126	0.2194	G6pdx
-0.471	3.246	0.5804	Fbxo4
-0.4708	5.398	0.1865	Crat
-0.4703	2.711	0.6594	Kdr
-0.4698	4.8	0.3196	Stard7
-0.4697	3.441	0.5215	Plin2
-0.4686	5.362	0.2553	Cse1l
-0.4685	5.362	0.2012	Zfp24
-0.4685	5.987	0.3857	Npm1
-0.4685	3.363	0.5476	Flad1
-0.4684	3.271	0.6393	Gm49380
-0.4683	5.544	0.1927	Dynll2
-0.4681	5.121	0.2917	Kcnj2
-0.4679	2.991	0.6393	Tubb4b
-0.4677	3.253	0.7129	Ranbp3l
-0.4676	3.538	0.4941	Tmem276-zftraf1
-0.4675	2.804	0.6222	Zfp358
-0.4671	6.66	0.2973	Ctnnd2
-0.4671	4.564	0.4073	Cdc16
-0.4671	3.259	0.5073	H2-Ke6
-0.4666	4.461	0.339	Tmem19
-0.4666	3.618	0.4718	Gm3468
-0.4662	8.234	0.2692	Ctsz
-0.466	3.194	0.6609	Erg28
-0.4654	3.757	0.5019	Lonrf1
-0.465	3.328	0.5111	Lamb2
-0.4649	5.25	0.1726	Clcc1
-0.4648	4.696	0.3405	1810030O07Rik
-0.4646	2.785	0.6069	Cntrob
-0.4644	3.562	0.4791	Nceh1
-0.4641	5.647	0.14	Zc3h7b
-0.4641	11.02	0.1478	Ctsd
-0.4641	3	0.6231	ENSMUSG00000120693
-0.4639	3.449	0.6516	C1d
-0.4637	6.714	0.09983	Spcs2
-0.4633	3.682	0.525	Ipo4
-0.4632	3.25	0.5612	Nop16
-0.4631	3.759	0.5026	Gm31243
-0.463	5.628	0.2174	Lrpap1
-0.463	4.648	0.336	Bcl7b
-0.4625	4.216	0.3735	Tm2d2
-0.4621	6.314	0.08339	Smad7
-0.4621	3.807	0.4198	Abracl
-0.462	2.956	0.6807	Map3k15
-0.4616	4.079	0.4005	Anapc7
-0.4611	9.337	0.481	Olfml3
-0.461	8.26	0.322	Ly6e
-0.4608	5.515	0.215	Atp6v1g1
-0.4607	3.767	0.6441	Syt11
-0.4605	5.307	0.2499	Drg1
-0.4603	5.373	0.2438	Slc25a25
-0.4592	4.721	0.3803	Gpr89
-0.4592	2.842	0.6132	Adtrp
-0.4583	4.862	0.2664	Sri
-0.4581	4.163	0.4545	Tsen34
-0.4581	5.09	0.5019	Hebp1
-0.4579	10.87	0.008519	Lgmn
-0.4579	6.687	0.1378	Arhgdib
-0.4579	5.952	0.1671	Lman2
-0.4575	4.027	0.4737	Ginm1
-0.4573	3.668	0.4828	Zfp958
-0.4571	4.311	0.3624	Cxxc1
-0.4568	6.47	0.2546	Fau
-0.4568	3.806	0.4364	Naf1
-0.4567	6.053	0.2257	Snrnp200
-0.4567	4.957	0.2628	Rcn2
-0.4564	4.853	0.2419	Rnf139
-0.4561	6.787	0.08647	Slc44a2
-0.4558	4.781	0.3462	Ppp1r3b
-0.4555	4.457	0.502	Srp14
-0.4553	6.703	0.116	Lpgat1
-0.4551	6.571	0.1126	Evi2
-0.4547	4.862	0.3426	Eaf1
-0.4546	6.973	0.07003	Tram1
-0.4544	3.166	0.535	Hikeshi
-0.4544	3.115	0.6825	Comtd1
-0.4543	5.92	0.1431	Hsd17b12
-0.454	4.165	0.4503	Irf2bp1
-0.4539	4.891	0.3848	Eif4a3
-0.4538	5.998	0.1078	Hhex
-0.4538	3.155	0.5519	Tnfsf12
-0.4535	5.551	0.3095	Insyn2b
-0.453	3.354	0.6423	Wrnip1
-0.4524	7.458	0.04894	Npc1
-0.4524	3.322	0.6587	Armc10
-0.4523	4.946	0.3575	Tor1b
-0.452	3.728	0.5214	Otud1
-0.4518	4.939	0.2878	Naa12
-0.4513	4.919	0.3031	Hdac2
-0.451	3.391	0.5462	Prdx3
-0.4501	4.63	0.321	Wdtc1
-0.4495	5.779	0.1641	Rnf149
-0.4491	3.887	0.4609	Rnf24
-0.4486	4.469	0.3426	Tomm20
-0.4484	5.042	0.2231	Ppp2r1a
-0.4484	5.077	0.3476	Glmp
-0.4483	4.877	0.2417	Utp20
-0.4482	4.862	0.2771	Sidt2
-0.4482	4.105	0.4115	Chml
-0.4482	3.362	0.5137	Mrpl13
-0.4478	7.222	0.07428	Prkar1a
-0.4474	5.797	0.1743	Tbc1d1
-0.4474	5.161	0.6039	Rps3a1
-0.4472	5.305	0.2004	Plau
-0.4472	3.192	0.6657	Cox7a2
-0.447	5.435	0.2022	Fundc1
-0.4469	3.59	0.4912	Cbx6
-0.4468	3.312	0.6069	H2az2
-0.4466	7.814	0.04235	Ddx3x
-0.4465	7.318	0.04894	Clta
-0.4465	5.163	0.4077	Nap1l1
-0.4464	3.806	0.4369	Decr1
-0.4461	3.974	0.4727	Uqcrh
-0.4456	3.541	0.4808	Sephs2
-0.4455	6.085	0.2231	Lrp12
-0.4452	4.708	0.2854	Zfp40
-0.4449	5.82	0.1685	Tmco1
-0.4448	4.47	0.42	Nde1
-0.4438	5.657	0.3228	Mrfap1
-0.4438	4.088	0.4532	Psmc4
-0.4436	4.605	0.3522	Nedd8
-0.443	4.52	0.3636	Snrpb2
-0.4429	6.731	0.336	Eif1
-0.4427	5.158	0.2308	Prkaca
-0.4425	6.778	0.2438	Sgk1
-0.4418	5.629	0.2773	Prps2
-0.4418	3.669	0.4842	Anapc13
-0.4404	3.07	0.788	Egr1
-0.4399	5.993	0.1493	Derl1
-0.4399	4.689	0.2878	Gabarapl2
-0.4399	6.791	0.3095	Setbp1
-0.4395	6.846	0.1488	Ralgps2
-0.4395	3.131	0.5505	Gm28403
-0.4389	6.484	0.1092	Clip2
-0.4387	5.458	0.2386	Khsrp
-0.4387	3.793	0.4662	Thumpd1
-0.4381	5.917	0.6852	Rasgef1b
-0.4377	3.154	0.6426	Ppp1r18os
-0.4375	8.229	0.05127	Calm2
-0.4375	3.802	0.447	Ripor1
-0.4372	5.706	0.2278	Cdc37
-0.437	4.959	0.3523	Irf9
-0.4369	6.216	0.6121	Hnrnpa1
-0.4364	10.12	0.02667	Marcks
-0.4363	2.912	0.6689	Ado
-0.4359	4.815	0.3095	Slbp
-0.4358	4.483	0.4386	Syvn1
-0.4355	4.24	0.4253	Cnrip1
-0.4354	8.115	0.05644	App
-0.4351	6.723	0.5968	Mir142hg
-0.435	4.606	0.3624	Ndufc2
-0.435	3.832	0.5203	Map2k3
-0.4347	4.946	0.3442	Ccng1
-0.4341	3.974	0.4466	Phospho1
-0.434	5.739	0.2423	Cct6a
-0.4335	2.894	0.5582	Pwp2
-0.4328	6.45	0.1382	Selenof
-0.4324	6.156	0.1293	Nono
-0.4323	5.246	0.2363	Fkbp8
-0.4322	5.806	0.1881	Tdrd3
-0.4321	3.677	0.502	Cenpb
-0.4315	5.599	0.4373	Dnajb4
-0.4314	6.399	0.1398	Sqstm1
-0.4312	5.943	0.1722	Sash3
-0.4312	5.665	0.3029	Tomm70a
-0.4312	3.969	0.4779	Fam89b
-0.4311	3.739	0.4998	Rbfa
-0.4306	6.521	0.131	Slc38a1
-0.4306	6.132	0.1873	Calu
-0.4305	5.135	0.2308	Srp68
-0.4304	3.923	0.5429	Slc35a1
-0.4303	4.983	0.3969	Paics
-0.4303	3.307	0.6761	Nup107
-0.43	8.693	0.03614	Bin2
-0.4295	4.675	0.3662	Sf3a3
-0.4294	4.648	0.3914	Pogk
-0.4291	5.978	0.1525	Etf1
-0.4291	5.407	0.2166	Rbbp7
-0.4291	3.376	0.5519	Asf1a
-0.429	4.765	0.3682	Psmb8
-0.4288	3.364	0.672	Ptcd1
-0.4287	5.331	0.2983	Eno1
-0.4285	7.355	0.3971	Lag3
-0.4285	4.969	0.5064	Cpt1a
-0.4278	5.112	0.4645	Arrdc3
-0.4276	5.083	0.3095	Usp14
-0.4275	6.429	0.1176	Hadha
-0.4264	6.711	0.1139	Acly
-0.426	3.985	0.4785	Bak1
-0.4259	4.998	0.428	Cbx5
-0.4256	3.367	0.5511	Mfap1b
-0.4255	4.709	0.3943	1110059E24Rik
-0.4254	3.398	0.5667	Bivm
-0.4251	4.397	0.3686	Ctdnep1
-0.425	4.892	0.3732	Eif3d
-0.425	3.871	0.5418	Klhl23
-0.4249	4.676	0.4009	Inpp5f
-0.4237	3.07	0.6374	4930453N24Rik
-0.4235	7.699	0.2251	Gspt1
-0.4232	6.84	0.1155	Ociad1
-0.4231	3.529	0.5664	Nudt21
-0.4229	3.236	0.571	Srp54c
-0.4222	3.611	0.4677	Smim30
-0.422	4.37	0.3982	Katnal1
-0.4219	4.923	0.339	Pdia5
-0.4218	5.799	0.2322	Slc26a2
-0.4215	6.009	0.1569	Sil1
-0.4214	6.419	0.1389	Akt1
-0.4214	4.564	0.4765	Atp5h
-0.4214	3.232	0.6044	AI467606
-0.4213	3.863	0.472	Rbm15b
-0.4211	2.615	0.6812	Clec2d
-0.421	4.248	0.5171	Fkbp3
-0.4206	7.894	0.09753	Med12l
-0.4204	3.333	0.6637	B230354K17Rik
-0.4199	10.74	0.01536	Selenop
-0.4199	5.397	0.3029	Selenos
-0.4198	2.865	0.6027	Slc2a8
-0.4193	6.31	0.1524	Klhl6
-0.4192	8.696	0.1078	Trf
-0.4192	4.221	0.428	Cox17
-0.4189	5.916	0.2162	Anp32e
-0.4189	4.547	0.4279	Bscl2
-0.4188	5.661	0.226	Adipor2
-0.4186	6.513	0.09987	Arpc4
-0.4186	5.578	0.3005	Gm44503
-0.4184	8.545	0.05309	Cap1
-0.4183	6.505	0.1394	Nfya
-0.4178	6.308	0.3517	Spcs3
-0.4177	6.818	0.1993	Atp5b
-0.4176	3.901	0.5297	Rab5if
-0.4172	4.738	0.3352	Hk1
-0.4167	3.083	0.6428	Sros1
-0.4164	6.203	0.1587	Gnb2
-0.4164	3.371	0.5484	Capn2
-0.4164	3.145	0.5683	Aldh3b1
-0.4164	4.173	0.5874	Lypla2
-0.4162	5.982	0.1777	Uba1
-0.4162	6.636	0.2632	Dnajc3
-0.4154	6.137	0.1361	Efcab14
-0.4152	6.516	0.1711	Bzw1
-0.4148	3.235	0.5731	Gm10964
-0.4147	4.697	0.3642	Ap3m1
-0.4144	4.624	0.5015	Aifm1
-0.4141	4.471	0.4737	Tm9sf1
-0.414	6.586	0.1649	Clic1
-0.4139	4.588	0.4351	Synj2
-0.4139	2.674	0.9239	Tsix
-0.4137	3.068	0.6041	Ly6m
-0.4135	3.693	0.5164	Gm7964
-0.4127	7.226	0.1244	Ccni
-0.4126	4.111	0.4507	Zfp703
-0.4115	4.325	0.4039	Fzr1
-0.4111	3.534	0.5417	Rpl22l1
-0.411	5.141	0.2647	Grsf1
-0.4109	6.746	0.1512	Tmed5
-0.4108	6.52	0.1398	Cpne3
-0.4107	4.722	0.4523	Septin10
-0.4104	3.833	0.582	Leo1
-0.4104	3.654	0.6022	Csrnp1
-0.4103	4.66	0.3944	Dynlrb1
-0.4098	4.481	0.4157	Rnf123
-0.4096	4.042	0.5871	Ncoa7
-0.4091	2.922	0.6812	Gm19710
-0.409	5.146	0.2934	Psmb2
-0.4089	6.801	0.106	Sun2
-0.4089	6.271	0.2039	Arcn1
-0.4087	4.077	0.4677	Sde2
-0.4086	3.883	0.4629	Pigm
-0.4085	4.045	0.5914	St8sia4
-0.4083	4.089	0.472	Ammecr1
-0.4083	3.768	0.5363	Apmap
-0.4074	3.978	0.502	Ebna1bp2
-0.4071	3.597	0.5456	Lamtor2
-0.407	7.931	0.107	Cd164
-0.4068	4.653	0.4039	Cluh
-0.4067	3.477	0.699	C1qbp
-0.4066	4.238	0.4912	Zfp65
-0.4055	4.269	0.4555	BC031181
-0.4054	4.273	0.4645	Fam102a
-0.4053	4.646	0.3892	Ak1
-0.4052	3.27	0.7013	D130019J16Rik
-0.4049	8.545	0.0475	Efhd2
-0.4043	2.709	0.6231	Tmem198b
-0.4041	6.975	0.1065	Gal3st4
-0.404	3.395	0.582	Cactin
-0.4034	4.398	0.4972	Tmem43
-0.4032	4.969	0.419	Myl6
-0.4029	7.884	0.07369	Ywhae
-0.4028	4.741	0.3848	Hspa13
-0.4026	3.772	0.5373	Nfkbil1
-0.402	5.051	0.3041	Sfr1
-0.4019	9.501	0.02218	Ddx5
-0.4009	4.456	0.6613	Nfkbid
-0.4006	6.292	0.1662	Azin1
-0.4006	4.28	0.4007	Nup50
-0.4005	3.237	0.5897	Nemp2
-0.4	5.133	0.3548	Mesd
-0.3996	5.071	0.3396	Psmc1
-0.3995	3.332	0.6016	Phf5a
-0.3991	8.949	0.03783	Tln1
-0.3984	5.242	0.3426	Tcp1
-0.3982	8.678	0.03254	Gnai2
-0.3982	5.338	0.2664	Hnrnph2
-0.3982	4.314	0.5529	Tfdp1
-0.3981	4.589	0.3985	Polr3e
-0.3978	4.505	0.3972	Cdk5rap1
-0.3976	4.608	0.3732	Twf1
-0.3975	7.648	0.2528	Fcer1g
-0.3969	3.224	0.5952	Ndufa2
-0.3966	5.631	0.2608	Gm44250
-0.3965	9.116	0.03218	Basp1
-0.3963	9.228	0.1389	Myh9
-0.3956	4.067	0.4397	Ndufv3
-0.3955	3.786	0.503	Mrps2
-0.3954	3.066	0.6539	Actr6
-0.3952	8.921	0.04165	Msn
-0.3942	3.324	0.6654	Gm44686
-0.3938	6.579	0.161	Rbbp4
-0.3932	3.296	0.6452	Pdk2
-0.3928	6.535	0.2406	Arpc5
-0.3927	4.906	0.3624	Nlrp1a
-0.3926	7.212	0.1195	St13
-0.3924	7.176	0.231	Eif4a1
-0.3924	4.71	0.445	Gart
-0.3923	4.163	0.4507	Dr1
-0.3917	3.15	0.6166	Atosb
-0.3916	5.863	0.2746	Bag1
-0.3915	5.629	0.2872	Pnrc1
-0.3915	5.077	0.3653	Tgif1
-0.3913	6.38	0.2546	Tbc1d4
-0.3913	4.26	0.4844	Ticam2
-0.3906	8.315	0.3785	Fth1
-0.3906	3.478	0.5773	Rhbdf2
-0.3904	6.258	0.2154	Serp1
-0.3902	6.362	0.2308	Vps37b
-0.3901	4.125	0.5246	Srebf1
-0.3899	5.9	0.2177	Ids
-0.3892	4.279	0.5341	Zcwpw1
-0.3888	4.493	0.5087	Stambp
-0.3886	5.569	0.3548	Psme1
-0.3886	3.658	0.5519	Ciao3
-0.3885	5.008	0.3342	Exosc10
-0.3884	3.737	0.5521	Uqcrfs1
-0.3883	8.237	0.182	Hnrnpu
-0.3882	10.24	0.07463	Itm2b
-0.3882	3.423	0.6393	Pigx
-0.388	7.344	0.1924	Serinc1
-0.3879	3.241	0.7162	Cdkn1a
-0.3878	12.19	0.05402	Hexb
-0.3878	5.016	0.3722	Prim2
-0.3873	3.157	0.5864	Taf5l
-0.3866	6.158	0.2143	Cndp2
-0.386	5.271	0.3095	Sar1a
-0.3857	4.451	0.4044	Pccb
-0.3857	3.48	0.5968	Irgq
-0.3855	6.891	0.1176	Septin2 - ENSMUSG00000026276
-0.3854	4.052	0.4737	Gm42962
-0.3849	6.121	0.1847	Rhog
-0.3848	4.415	0.5167	Tpm4
-0.3845	3.614	0.6111	Sf3b4
-0.3841	3.653	0.6359	Slc16a1
-0.3839	5.711	0.3095	Calcrl
-0.3835	9.14	0.06733	Glul
-0.3834	5.531	0.2553	Rac2
-0.3834	5.418	0.339	Ankrd40
-0.3831	3.052	0.6719	Uros
-0.383	3.568	0.6231	Eif2b5
-0.3829	5.346	0.3134	Rnf144b
-0.3829	3.963	0.6957	Sgsh
-0.3825	3.03	0.6299	Pcx
-0.3824	5.749	0.2679	Klhl9
-0.3822	5.904	0.2239	Tnfrsf1a
-0.3819	7.267	0.1304	Ifnar2
-0.3817	3.783	0.5923	Naxe
-0.3815	4.73	0.4468	Gnl3
-0.3813	5.652	0.2325	Txlna
-0.381	9.367	0.2973	Jarid2
-0.3803	5.079	0.3791	Hfe
-0.38	5.274	0.3565	Cops2
-0.38	5.233	0.4758	Tmem123
-0.38	3.848	0.5618	Mynn
-0.38	3.625	0.5827	Nsmce1
-0.3798	4.286	0.4258	Ugdh
-0.3794	5.612	0.3962	Lst1
-0.3794	4.872	0.4933	ENSMUSG00000121501
-0.3784	4.55	0.5252	Slc12a7
-0.3783	5.591	0.2771	D030028A08Rik
-0.3782	4.886	0.4677	Adprh
-0.3779	3.085	0.7064	Ralgds
-0.3778	6.454	0.5156	Cd63
-0.3774	4.979	0.3396	Nipsnap2
-0.3773	7.742	0.0766	Pla2g15
-0.3773	5.237	0.3435	Wbp4
-0.377	8.722	0.1678	Grn
-0.3769	5.366	0.4373	Pa2g4
-0.376	4.218	0.4949	Pcid2
-0.3759	3.062	0.6847	Aamdc
-0.3757	4.484	0.4465	Rnf7
-0.3755	2.928	0.668	Spr
-0.3755	2.962	0.706	Tada2b
-0.3751	6.012	0.3061	Slc16a10
-0.3751	4.859	0.4203	Lrrc59
-0.375	5.799	0.561	Abhd2
-0.3749	6.652	0.1687	Sf3b2
-0.3747	4.804	0.5391	Sec13
-0.3745	3.914	0.5348	Unc13d
-0.374	3.967	0.502	Heatr3
-0.3738	4.092	0.6113	Cox7b
-0.3736	7.191	0.1309	Os9
-0.3736	4.201	0.5042	Csgalnact2
-0.3735	6.844	0.1935	Eif3c
-0.3734	4.033	0.5434	Pgap1
-0.3732	5.947	0.2917	Nub1
-0.3732	5.494	0.2973	Igbp1
-0.3729	3.46	0.5536	Mms22l
-0.3728	3.954	0.5864	Tsr1
-0.3727	4.279	0.472	Psmd13
-0.3727	3.184	0.6382	Pla2g12a
-0.3725	4.578	0.4452	Unc50
-0.3722	4.468	0.428	Ak3
-0.3717	4.845	0.4131	Rpl10a
-0.3714	3.561	0.6174	E430024I08Rik
-0.371	3.897	0.5667	Psmb10
-0.3705	4.043	0.5391	Hars
-0.3703	3.634	0.5914	Ndufb7
-0.3701	4.429	0.4133	Srek1ip1
-0.3701	3.692	0.5363	Agtrap
-0.3699	9.958	0.0511	Rapgef5
-0.3699	4.751	0.449	Rps28
-0.3696	3.042	0.7357	Or2v1
-0.3695	3.257	0.6329	Dlg5
-0.3681	7.305	0.1208	Hdlbp
-0.3678	4.107	0.5617	Lrrc4
-0.3678	4.636	0.5776	Srgap3
-0.3677	3.013	0.6534	Zrsr1
-0.3676	7.193	0.1429	Kpnb1
-0.3676	6.247	0.3166	Ssr3
-0.3674	3.441	0.6663	Ezh2
-0.3671	4.235	0.5447	Spindoc
-0.3669	4.36	0.4866	Eci2
-0.3667	7.409	0.09641	Atp6v0a2
-0.3657	4.891	0.3522	Usp38
-0.3654	8.518	0.07381	Pros1
-0.3654	6.511	0.1937	Ccdc47
-0.3654	4.44	0.5691	Pabpc4
-0.365	3.314	0.7108	Pard3bos1
-0.3647	4.777	0.4778	Tpi1
-0.3646	4.275	0.5064	Galns
-0.3646	4.102	0.5251	Cnr2
-0.3644	4.662	0.5484	Gm6712
-0.3642	5.41	0.304	Golga3
-0.364	3.013	0.6611	Zdhhc24
-0.3639	7.454	0.1173	Caprin1
-0.3639	5.435	0.3324	Jup
-0.3636	7.096	0.2933	Tpd52
-0.3631	7.562	0.1478	Ptma
-0.363	4.892	0.3924	Maz
-0.3628	6.656	0.2589	Snx6
-0.3627	5.312	0.4147	Psma1
-0.3624	4.759	0.445	Zc3h6
-0.3621	4.149	0.5252	Atp5j2
-0.362	5.691	0.2531	Cnot8
-0.3619	6.161	0.2157	Amfr
-0.3619	4.988	0.3519	Copz1
-0.3618	4.817	0.4701	Gid8
-0.3618	4.458	0.5802	Atpif1
-0.3612	8.081	0.1131	Rac1
-0.3609	7.868	0.3825	Npc2
-0.3606	5.328	0.3194	Cwc15
-0.3603	4.74	0.5015	Prickle1
-0.3602	4.964	0.3409	Kifbp
-0.36	3.037	0.7819	Fcgr4
-0.3598	4.954	0.4009	Fkbp1a
-0.3597	6.584	0.2566	Tmem50a
-0.3597	6.053	0.2664	Nova1
-0.3596	5.467	0.3418	Tnfrsf13b
-0.359	8.224	0.109	Tmbim6
-0.359	4.254	0.5519	Cops6
-0.3589	3.493	0.5719	St6galnac6
-0.3589	3.054	0.6756	Phf11b
-0.3587	3.164	0.6283	Pdgfa
-0.3586	5.142	0.4233	Tap2
-0.3583	6.706	0.1394	Hvcn1
-0.3583	5.728	0.2815	Prkab1
-0.3582	8.515	0.07952	Cd53
-0.3581	4.221	0.5451	Scrn3
-0.3577	5.276	0.3576	Plaa
-0.3575	6.181	0.2308	Rgmb
-0.3575	3.399	0.5914	2810001A02Rik
-0.3574	5.4	0.3928	Taldo1
-0.3573	6.559	0.182	Vasp
-0.3572	5.438	0.3803	Rps2
-0.3571	6.639	0.1662	Ywhag
-0.3571	5.263	0.6521	Pcyox1
-0.3571	3.108	0.6769	Tceal8
-0.3567	2.793	0.6903	Eef1akmt2
-0.3566	8.504	0.05402	Tpm3
-0.3562	7.117	0.1032	Arl8b
-0.3561	3.558	0.5977	Zfp558
-0.356	6.892	0.3534	Plcb2
-0.3558	3.398	0.6072	Dpy30
-0.3557	4.101	0.5283	Polr3c
-0.3557	3.567	0.5937	Ift46
-0.3552	2.954	0.7103	Trappc2l
-0.3551	4.144	0.6278	2900026A02Rik
-0.3551	3.601	0.6973	Fads3
-0.3544	3.683	0.5968	Bcat2
-0.3543	4.942	0.3777	Commd7
-0.3543	3.901	0.6027	Aldh7a1
-0.3539	4.849	0.705	H2-Q4
-0.3536	6.902	0.2039	Sting1
-0.3536	2.909	0.6832	Nsmf
-0.3535	3.787	0.6222	Las1l
-0.3533	5.263	0.3915	Ctr9
-0.3528	5.379	0.3811	Tal1
-0.3527	4.192	0.4941	Tmem14c
-0.3525	6.788	0.1894	Ralb
-0.3524	5.703	0.3349	Aamp
-0.3522	3.199	0.6359	Nt5c
-0.3518	7.547	0.1705	Atf6
-0.3518	6.821	0.2385	Acvr1
-0.3517	3.197	0.6325	Gk
-0.3514	4.937	0.5132	Paqr7
-0.3514	3.874	0.6222	Slc35e3
-0.351	6.786	0.6421	Cd83
-0.3508	4.664	0.5046	Lbr
-0.3505	2.84	0.7314	Tmem186
-0.3503	4.795	0.5929	Fam217b
-0.3496	6.924	0.161	Tmem59
-0.3496	3.653	0.5964	Pdcd5
-0.3495	4.354	0.5459	Bop1
-0.3494	6.266	0.4192	Tmem176b
-0.3493	7.103	0.1316	Tifab
-0.3493	5.102	0.354	Coq2
-0.349	2.776	0.7275	Tceanc
-0.3489	4.16	0.5193	Rinl
-0.3486	4.258	0.7226	AI506816
-0.3479	3.858	0.603	Mical1
-0.3479	3.158	0.6612	Cdc34
-0.3478	4.234	0.5009	Spcs1
-0.3477	5.755	0.413	Aars
-0.3475	5.337	0.3296	Med22
-0.3474	7.147	0.2459	Bsg
-0.3473	5.611	0.3065	Mff
-0.3471	4.45	0.5193	Map7
-0.3466	4.946	0.4036	Tuba1a
-0.3464	5.628	0.3435	Themis2
-0.3463	6.478	0.2906	Eif5
-0.3462	6.568	0.1708	Adam15
-0.3461	6.518	0.1825	Ppp1r18
-0.3461	4.397	0.5299	Ebag9
-0.3459	4.222	0.6393	Cracr2a
-0.3457	3.918	0.5883	Igtp
-0.3456	7.934	0.1386	Hnrnpk
-0.3455	3.973	0.5358	Syngap1
-0.3454	7.033	0.1233	Ubr4
-0.3454	3.162	0.6481	Mrps18a
-0.345	7.164	0.1959	Lrrc3
-0.3445	5.359	0.3071	Socs4
-0.3442	4.527	0.5417	Snrpd3
-0.3441	3.561	0.6325	Ebp
-0.3439	4.208	0.5392	Bpnt2
-0.3438	8.783	0.07468	Lcp1
-0.3438	6.202	0.262	Smarca5
-0.3436	4.21	0.6657	Zmiz1os1
-0.3434	3.649	0.6354	Grpel1
-0.3434	3.081	0.692	Acot8
-0.343	3.426	0.6254	Rtca
-0.3428	4.396	0.5059	Rbsn
-0.3428	3.775	0.6074	Tmem185b
-0.3427	4.524	0.5348	Tes
-0.3427	2.808	0.6933	Spock2
-0.3425	3.706	0.6074	Ten1
-0.3424	5.52	0.3791	Ugp2
-0.3422	6.294	0.3095	Vcp
-0.3421	3.773	0.6452	Mmut
-0.3419	4.728	0.4468	Sh2b1
-0.3416	6.532	0.2179	Atp6ap2
-0.3416	5.122	0.4718	Ikbkg
-0.3413	4.635	0.5064	Smarcb1
-0.3411	6.943	0.2438	Pon3
-0.3409	5.169	0.3618	Ap1m1
-0.3409	4.896	0.4653	Washc3
-0.3409	3.997	0.5459	Paf1
-0.3403	3.486	0.6445	Pithd1
-0.3403	3.241	0.6905	Dclre1a
-0.3403	2.968	0.7451	Aph1a
-0.3402	8.137	0.08317	Adgrg1
-0.3402	4.573	0.4984	Cript
-0.3395	7.085	0.2012	Tmed10
-0.3393	6.696	0.2057	Atp6ap1
-0.3392	3.451	0.6482	1600010M07Rik
-0.339	5.64	0.3078	Sec11c
-0.3389	3.999	0.5844	Gba2
-0.3387	3.761	0.6043	Dnajb5
-0.3386	6.271	0.2411	Ipo9
-0.3385	5.585	0.3825	Adrb2
-0.3378	9.855	0.05493	Itgam
-0.3378	7.005	0.17	Morf4l1
-0.3377	5.691	0.3425	Hprt
-0.3375	6.849	0.1796	Tapbp
-0.3373	5.033	0.3848	Ptpn9
-0.337	3.576	0.5923	Nit1
-0.3369	5.94	0.3595	Snx1
-0.3369	3.956	0.6393	Lyar
-0.3367	3.607	0.6231	Glrx
-0.3364	5.764	0.2968	Clcn4
-0.3362	4.551	0.5245	Irs2
-0.3358	4.857	0.4188	Flot1
-0.3355	6.418	0.3344	Zfand5
-0.3354	4.064	0.6406	Dipk1a
-0.3352	3.822	0.6126	Guf1
-0.335	3.818	0.6167	Eif2s3x
-0.3348	2.795	0.675	Det1
-0.3347	5.251	0.3565	Sh3gl1
-0.3346	6.993	0.2452	Arhgap4
-0.3344	4.401	0.4672	Bud31
-0.3342	4.15	0.5612	Slc39a14
-0.3335	9.276	0.2149	Cd81
-0.3334	6.1	0.2921	Gclc
-0.3329	3.42	0.6809	Pigp
-0.3327	6.138	0.2452	Bnip3l
-0.3326	5.829	0.4304	Rpl23a
-0.3325	5.045	0.4137	Manea
-0.3318	6.605	0.2286	Ssr1
-0.3316	6.218	0.2439	B3galt5
-0.3313	5.961	0.2933	Gm21970
-0.3313	3.026	0.6883	Clp1
-0.3312	7.71	0.1621	Ehd4
-0.3304	3.013	0.7021	Gm45777
-0.3303	5.369	0.3836	Bmi1
-0.3299	4.611	0.502	Tmem109
-0.3297	5.947	0.2983	Vapb
-0.3296	4.068	0.6663	Bccip
-0.3295	5.42	0.3975	Rsl1d1
-0.3289	4.8	0.4616	Hgsnat
-0.3289	4.358	0.5283	Acads
-0.3285	8.859	0.1334	Retreg1
-0.3282	5.364	0.4264	Tex261
-0.3279	3.983	0.6368	Ptk2
-0.3276	4.919	0.4452	Tmem268
-0.3274	4.416	0.5087	Adi1
-0.3272	3.162	0.7866	Ankrd13d
-0.3271	6.422	0.3962	Snx2
-0.3271	3.329	0.7309	Cd274
-0.3265	6.221	0.3149	Pcbp1
-0.3265	3.971	0.561	Tbl2
-0.3262	5.492	0.3575	Plekhf2
-0.3261	6.579	0.1881	Rad21
-0.3257	4.882	0.5087	Txndc12
-0.3256	3.536	0.6918	Emc4
-0.3255	3.62	0.5968	Tmem128
-0.325	3.421	0.6918	Crem
-0.3249	6.134	0.3548	Bicral
-0.3248	7.434	0.1431	Hmgb1
-0.3247	2.733	0.9612	Eif2s3y
-0.3242	4.76	0.4991	Stxbp2
-0.3241	5.697	0.5341	Rpl37a
-0.324	7.919	0.1334	Cotl1
-0.3239	5.844	0.3227	Dnajc8
-0.3238	5.513	0.4008	Grina
-0.3234	6.657	0.2363	Il17ra
-0.3233	5.184	0.4597	1110004F10Rik
-0.3231	5.85	0.4597	Hyou1
-0.3228	4.686	0.5009	Dlg3
-0.3224	5.935	0.3496	Myo7a
-0.3223	3.345	0.6613	Aasdhppt
-0.3219	6.688	0.2363	Litaf
-0.321	8.685	0.1394	Eif4g2
-0.3209	7.233	0.1635	Arhgef40
-0.3209	6.387	0.4873	Gapdh
-0.3204	4.228	0.621	Pilra
-0.3201	5.944	0.3543	Scd2
-0.3201	3.726	0.6182	Smdt1
-0.3198	4.273	0.5467	Eif1ax
-0.3197	6.08	0.3493	Shisa5
-0.3197	4.924	0.4779	Nol7
-0.3196	8.173	0.121	Hexa
-0.3194	3.536	0.6481	Ano8
-0.3194	3.351	0.6867	Rgs12
-0.3193	4.97	0.5087	Tollip
-0.3189	8.184	0.1437	Trem2
-0.3188	9.442	0.1316	Klf12
-0.3188	4.607	0.5057	Rbl1
-0.3187	4.36	0.5822	Oxa1l
-0.3186	8.258	0.1647	Tjp1
-0.3186	6.061	0.3095	Etv1
-0.3186	4.816	0.5395	Klk8
-0.3181	5.463	0.4781	Ilk
-0.3181	3.188	0.7629	Ube2d-ps - ENSMUSG00000083844
-0.318	5.918	0.5802	Rap1gap2
-0.3176	5.44	0.4007	Ano10
-0.3174	3.54	0.7194	Rrm1
-0.3173	3.246	0.672	Retsat
-0.3171	3.728	0.6539	4833411C07Rik
-0.3163	3.131	0.7222	Naa10
-0.3162	3.744	0.6393	Cdca4
-0.3162	3.585	0.692	6030468B19Rik
-0.3161	3.198	0.6828	F9
-0.3159	8.092	0.2031	Chst11
-0.3156	9.467	0.1227	Bmp2k
-0.3156	4.171	0.5935	Ankrd50
-0.3153	5.082	0.4497	Slc30a5
-0.3153	3.417	0.6517	Dctn3
-0.3152	4.229	0.5935	Plscr3
-0.315	4.305	0.5527	Snapc1
-0.315	2.938	0.693	Timm29
-0.3148	2.925	0.6973	Zfp574
-0.3146	3.562	0.6765	Sumf2
-0.3144	4.057	0.6126	Casp9
-0.3142	8.583	0.1071	Actr2
-0.3142	5.183	0.3806	Pex2
-0.314	6.766	0.2439	G3bp2
-0.3137	4.891	0.5113	Rnf187
-0.3135	8.693	0.1378	Lims1
-0.3132	7.58	0.1438	Snx18
-0.313	3.292	0.6587	Gm49322
-0.3129	6.574	0.2418	Map7d1
-0.3127	3.968	0.6166	Tnfsfm13
-0.3125	4.082	0.6689	Arsa
-0.3123	5.792	0.3027	Fuca1
-0.3123	4.038	0.6852	Plcb4
-0.3121	4.548	0.6069	Ankmy2
-0.3118	2.811	0.7129	Snrpe
-0.3116	3.944	0.6131	Enpp2
-0.3115	6.988	0.3095	Klf7
-0.3114	4.528	0.4859	Otud6b
-0.3113	3.875	0.5968	Rbm45
-0.3112	12.09	0.5461	mt-Rnr2
-0.3109	6.711	0.4134	Cnbp
-0.3108	3.783	0.6358	Atg16l2
-0.3106	4.894	0.4578	Pgrmc1
-0.3105	2.904	0.7103	Utp23
-0.3104	3.872	0.6876	Qars
-0.31	4.549	0.5315	Zkscan8
-0.31	4.288	0.5582	Med7
-0.3098	10.2	0.1569	Psap
-0.3094	3.3	0.6819	Cinp
-0.3093	3.494	0.697	Nrm
-0.3092	5.887	0.5358	Rnls
-0.3092	3.755	0.6145	Gtpbp8
-0.3091	5.82	0.384	Sptan1
-0.309	6.562	0.2973	Magt1
-0.309	6.049	0.3962	G3bp1
-0.309	4.144	0.5667	Neurl4
-0.309	4.138	0.5846	Noc3l
-0.309	3.632	0.6393	Snapc5
-0.309	3.72	0.7108	Ltv1
-0.3089	4.613	0.5196	Sgpp1
-0.3086	4.314	0.6228	Sugp1
-0.3084	4.936	0.5341	Nop56
-0.3084	3.948	0.6174	Tomm6
-0.3083	5.328	0.6514	Kiz
-0.3077	8.019	0.2307	Abr
-0.3076	4.721	0.5159	Gm10134
-0.3076	3.748	0.6587	Zfp422
-0.3074	5.423	0.411	Zfp512
-0.3072	7.234	0.1603	Actr3
-0.3072	7.958	0.1662	Dtx4
-0.3062	2.923	0.7127	Mrpl47
-0.3061	8.321	0.1676	Anxa3
-0.306	5.114	0.5325	Gtf2ird1
-0.306	3.553	0.6384	Ddx41
-0.3058	4.656	0.5064	Agpat1
-0.3055	5.824	0.3548	Spg20
-0.3053	5.155	0.4926	Lyl1
-0.3053	4.249	0.5965	Vps28
-0.3053	3.163	0.7038	Dolpp1
-0.3052	6.116	0.6254	Zfp36
-0.3051	8.804	0.1176	Capza2
-0.3051	6.601	0.2616	Srsf11
-0.305	4.737	0.6041	Yipf5
-0.305	3.852	0.6261	Atp1a2
-0.305	2.945	0.7542	Kbtbd8
-0.3049	3.651	0.6393	Ccnyl1
-0.3047	7.48	0.1601	Gnb1
-0.3045	4.719	0.5046	Dhx32
-0.3045	2.895	0.8017	5730522E02Rik
-0.3041	8.119	0.1696	Dync1h1
-0.304	2.871	0.7388	D17H6S53E
-0.3038	4.085	0.6393	Bloc1s6
-0.3037	5.034	0.4757	Frg1
-0.3036	5.724	0.3529	Naa50
-0.3035	5.532	0.6423	Hivep2
-0.3033	8.125	0.2215	Snx13
-0.3033	3.456	0.6685	Tmem60
-0.3032	3.693	0.6742	Nol8
-0.3029	3.97	0.6403	Pttg1
-0.3026	5.956	0.3576	Flii
-0.3025	4.636	0.5794	Afdn
-0.3024	5.18	0.4304	Ppp1r7
-0.3023	4.167	0.5968	Ubl5
-0.3022	5.486	0.5164	Gvin-ps7
-0.3019	3.68	0.6736	Mfsd12
-0.3018	3.983	0.8139	Gm8091
-0.3017	6.168	0.3711	Afap1l1
-0.3016	6.183	0.3677	Rnf19b
-0.3014	10.28	0.1101	Selplg
-0.3014	5.132	0.6393	B4galt5
-0.3013	4.667	0.5431	Cfap97
-0.3012	6.221	0.3043	Clptm1
-0.3012	5.846	0.3848	Notch1
-0.3011	4.875	0.6134	Lonrf3
-0.3008	7.932	0.2296	Ywhah
-0.3007	5.332	0.5536	Sertad2
-0.3006	7.603	0.2742	Rasal2
-0.3006	4.595	0.6324	Zdhhc21
-0.3005	6.446	0.3095	Rab27a
-0.3005	4.225	0.5935	Rfc2
-0.3005	4.578	0.6186	Snrpa
-0.3003	6.607	0.3245	Hnrnpul2
-0.3003	4.018	0.6222	Slc27a4
-0.3001	4.649	0.5589	Bend6
-0.3001	4.742	0.5594	Hspe1
-0.3001	3.628	0.6812	Fam167b
-0.2999	4.921	0.4626	Shc1
-0.2997	6.292	0.4853	Nlrp3
-0.2993	4.488	0.5796	Pip4k2c
-0.2992	5.369	0.4581	Kdm6b
-0.2992	4.67	0.5667	Fkbp2
-0.2991	5.408	0.4865	Lrp10
-0.2989	6.009	0.4188	Mcfd2
-0.2988	6.152	0.3609	Arf4
-0.2988	4.558	0.5348	Rnf168
-0.2987	3.09	0.7315	Cops7b
-0.2981	4.01	0.6796	Phb2
-0.298	3.155	0.7249	Hax1
-0.2975	5.028	0.6904	Farp1
-0.2972	3.745	0.6393	Shfl
-0.2971	3.808	0.6393	Ndufa6
-0.297	6.063	0.3522	Zcchc24
-0.2968	4.999	0.5164	Tasl
-0.2968	4.329	0.6067	Ccdc174
-0.2959	4.536	0.5885	Jpt2
-0.2958	7.076	0.2026	Tmed7
-0.2958	4.204	0.6393	Mrps5
-0.2956	4.436	0.5718	Ubxn1
-0.2951	4.212	0.6912	Nol6
-0.2945	5.357	0.5341	Psmd2
-0.2945	4.239	0.6253	Ro60
-0.2943	5.692	0.4452	Hsbp1
-0.2941	6.462	0.2771	Zfp706
-0.2939	3.744	0.6637	Bud23
-0.2936	4.091	0.5861	Kctd5
-0.2932	3.15	0.7577	Cyb561d1
-0.2931	5.241	0.4627	Eif3e
-0.2931	5.7	0.4639	Heatr1
-0.2931	4.103	0.6021	Ppm1m
-0.293	3.808	0.735	Alg13
-0.2929	8.047	0.1629	Ptp4a2
-0.2926	7.043	0.2097	Hnrnpc
-0.2923	3.657	0.691	Mfsd5
-0.2918	5.628	0.538	Dcp1b
-0.2917	4.41	0.5807	Idh1
-0.2916	4.726	0.5196	Vdac3
-0.2913	8.116	0.1771	Asah1
-0.2913	4.929	0.5788	Ppp1r13b
-0.2913	3.411	0.6609	Acsf3
-0.2911	4.583	0.5193	Zcchc17
-0.2911	4.955	0.5424	Vamp3
-0.2911	4.395	0.5899	Abhd13
-0.291	5.048	0.5363	Uqcrc1
-0.291	4.694	0.5572	BC004004
-0.2905	4.453	0.6988	Trim47
-0.2901	2.084	0.9429	ENSMUSG00000120679
-0.2899	4.54	0.6388	Ints1
-0.2897	3.337	0.7051	Ccdc124
-0.2893	3.017	0.7836	Unc45a
-0.2892	4.688	0.5315	Ube2a
-0.2892	10.45	0.6027	Ctsb
-0.2886	6.398	0.3962	Nucks1
-0.2886	4.182	0.6528	Ric3
-0.2884	8.218	0.1748	Rap1b
-0.2881	5.86	0.3684	Adora3
-0.288	3.863	0.6452	Lamtor5
-0.2876	5.535	0.4077	Rgs19
-0.2876	5.534	0.4131	Ppp1r15b
-0.2876	4.462	0.5608	Trmt1
-0.2875	3.492	0.6973	Taf11
-0.2874	4.589	0.5538	Maf1
-0.2871	3.451	0.7466	F830045P16Rik
-0.2868	5.842	0.4653	Snx3
-0.2867	8.694	0.1269	Ifngr1
-0.2865	4.6	0.5536	Clec4a2
-0.2865	4.34	0.615	Gatad1
-0.2863	5.024	0.5506	Hdgf
-0.2862	8.631	0.143	Itga6
-0.2862	3.052	0.732	Paip2b
-0.2856	3.344	0.732	Rccd1
-0.2855	5.138	0.4949	Ndufa9
-0.2854	4.177	0.5914	Srd5a3
-0.2852	3.724	0.7259	Atad2
-0.2851	4.609	0.5519	Gm38071
-0.2851	3.895	0.6519	Hsf2
-0.285	5.132	0.525	Puf60
-0.285	4.193	0.6565	2410006H16Rik
-0.285	3.465	0.6742	Ppil3
-0.2849	5.008	0.5127	Dele1
-0.2848	3.068	0.7818	Tmem115
-0.2846	4.246	0.6768	Gm12610
-0.2845	7.826	0.1923	Rab3il1
-0.2845	5.993	0.3429	Snx17
-0.2843	4.495	0.5901	Retreg2
-0.2842	4.31	0.658	Btf3
-0.284	6.728	0.3924	Fgd3
-0.2839	6.218	0.3063	Rab11a
-0.2838	3.115	0.7498	Med21
-0.2837	4.05	0.6558	Cops8
-0.2837	3.785	0.6809	Pak4
-0.2836	6.198	0.4152	Vmp1
-0.2833	5.156	0.5386	Trim24
-0.283	5.371	0.4933	Hnrnpa0
-0.2829	6.479	0.3662	Sorl1
-0.2824	3.361	0.7457	Ovca2
-0.2822	6.099	0.3892	Necap2
-0.2822	5.688	0.4491	Ptges3
-0.2822	3.86	0.6694	Pja1
-0.282	3.125	0.7121	Tm2d3
-0.2819	5.917	0.3809	Mapk9
-0.2814	3.913	0.7073	Dclk2
-0.2812	5.353	0.6144	Tnfaip3
-0.2808	5.353	0.4546	Psmb1
-0.2806	6.264	0.5493	Glis3
-0.2806	4.588	0.5929	Btbd3
-0.2806	3.52	0.7376	Slc35b1
-0.2805	3.07	0.7465	Fundc2
[truncated: 55,011 more rows]

## Sheet: DE-FRM
logFC	AveExpr	p_val_adj	gene_names
-7.116	1.14	6.862e-06	Cd36
-5.973	0.6452	0.0004396	Adgrg5
-5.797	1.484	0.0005758	4930519F16Rik
-5.751	1.08	0.0002492	Actr3-ps
-5.091	4.405	0.006557	Gm47283
-4.933	4.449	0.002612	Cd300lf
-4.827	-1.254	2.311e-05	Pcna-ps2
-4.601	-0.5555	0.0001171	Scml2
-4.546	1.325	0.003504	Gm29536
-4.192	0.6131	0.2321	Susd4
-4.098	0.7953	0.006928	Brinp2
-4.031	0.2822	0.002052	Gm14584
-4.021	1.596	0.5211	Gm8189
-3.996	6.369	5.383e-05	Nrxn1
-3.825	0.7033	0.1515	Gm15726
-3.801	1.629	0.000206	Pcnx2
-3.627	1.71	0.08441	Pianp
-3.617	2.655	0.005481	Rab37
-3.495	-0.08555	0.0006959	Gm37800
-3.475	1.009	0.09238	Ang4
-3.446	0.3455	0.05254	B230206L02Rik
-3.253	4.972	0.1499	Colec12
-3.178	6.097	0.0001746	Nme7
-3.124	2.602	0.1906	Gm49692
-3.073	0.4555	0.0006906	Gm36266
-3.06	-0.3038	0.003225	Gm7285
-2.991	0.4625	0.001243	Glipr2
-2.957	2.158	0.04651	Gm44257
-2.872	1.345	0.002737	Gm55594
-2.864	4.449	0.2901	Gnb4
-2.693	0.9743	0.14	Atp6v0e2
-2.609	0.6459	0.181	Gm40847
-2.486	9.981	1.4e-10	Arsb
-2.43	3.066	0.01464	Cacng8
-2.4	-0.2766	0.3027	Slc44a4
-2.326	2.151	0.006928	Adamts1
-2.309	1.596	0.0004396	Zc3hav1l
-2.275	0.5375	0.006348	Tshz3
-2.232	0.6037	0.01813	Zfp185
-2.2	-0.2156	0.2261	Gm40864
-2.158	1.587	0.002612	Gm29282
-2.151	0.7921	0.1262	Gm19196
-2.143	0.8827	0.007335	Ralyl
-2.122	2.077	0.2995	Gm3716
-2.107	0.1802	0.04715	Hs3st2
-2.098	1.486	0.004979	ENSMUSG00000120357
-2.036	1.296	0.02698	1700020L13Rik
-2.036	0.3367	0.01147	Zfp612
-1.979	1.5	0.1948	Parpbp
-1.969	1.1	0.006349	Hcar2
-1.96	1.646	0.02152	Hspa1b
-1.912	2.845	0.002737	9330185C12Rik
-1.9	3.24	0.09047	Unc5cl
-1.885	3.858	0.1515	Angptl7
-1.88	4.643	0.1994	Magi2
-1.866	1.646	0.008017	Gm44574
-1.865	0.4304	0.008701	4930567H12Rik
-1.851	-0.02353	0.6255	Rps18-ps6
-1.842	2.531	0.1309	Rcan2
-1.824	3.01	0.000489	Spock1
-1.819	4.301	0.004486	Cd52
-1.819	0.6461	0.445	Umodl1
-1.814	0.9916	0.01032	Zfp457
-1.812	7.622	0.2599	Cacna1a
-1.807	0.4317	0.02988	ENSMUSG00000120712
-1.772	4.096	0.4308	Slc15a2
-1.752	0.5088	0.02459	Gm49625
-1.751	0.6955	0.005223	Ccnd2
-1.751	1.094	0.4006	Gm50252
-1.736	0.9754	0.005061	Mycbpap
-1.733	0.6132	0.007984	G630030J09Rik
-1.728	0.5139	0.05804	Abcc9
-1.721	4.552	0.02988	Gm10138
-1.714	5.344	0.0003256	Sfmbt2
-1.704	1.671	0.005447	Nbl1
-1.7	5.189	0.08079	Qsox1
-1.696	0.1701	0.3171	Hal
-1.695	3.219	0.0009355	Chic1
-1.688	0.3968	0.01661	Gm47794
-1.671	2.633	0.00167	Ccl12
-1.658	1.418	0.005481	Gm47448
-1.653	1.457	0.01692	ENSMUSG00000120134
-1.628	2.654	0.001515	Ccdc102a
-1.621	7.448	0.2029	Nhs
-1.616	1.058	0.04207	ENSMUSG00000120371
-1.615	3.375	0.01148	Ccrl2
-1.612	2.107	0.02616	ENSMUSG00000120869
-1.59	3.188	0.003917	Kcp
-1.585	0.497	0.03922	Nrarp
-1.575	-0.1389	0.6786	ENSMUSG00000120973
-1.568	1.117	0.00999	ENSMUSG00000120202
-1.547	2.372	0.008715	Gm5420
-1.545	0.7973	0.02561	ENSMUSG00000120430
-1.541	4.299	0.2688	Cd244a
-1.535	1.357	0.009878	Gm10762
-1.52	1.461	0.0176	Ubxn11
-1.52	1.75	0.2554	Sntg2
-1.515	5.807	0.003241	Alox5
-1.511	4.78	0.0356	Atf3
-1.505	0.6437	0.04272	Rspo1
-1.5	1.226	0.01944	ENSMUSG00000120054
-1.485	2.999	0.1028	Ccl3
-1.483	1.016	0.03447	Gm14636
-1.46	5.494	4.126e-05	Ubc
-1.447	1.163	0.01492	Mageh1
-1.445	0.9819	0.04495	Ccnjl
-1.445	2.952	0.02194	Spry1
-1.434	3.289	0.005458	Tex14
-1.431	3.134	0.05763	Fos
-1.429	0.4955	0.1059	Cfap77
-1.428	2.941	0.01894	AI504432
-1.421	0.3786	0.04437	Kcnn4
-1.415	2.822	0.5557	Zfp268
-1.406	5.501	0.01692	Rgs1
-1.399	2.661	0.01281	ENSMUSG00000120030
-1.396	0.9817	0.04516	2310067P03Rik
-1.395	4.488	0.02094	Arhgap27os3
-1.389	2.69	0.005025	Klf2
-1.388	3.395	0.04888	Map3k19
-1.38	1.863	0.007689	1700020N01Rik
-1.379	1.152	0.02135	Kcna3
-1.374	1.623	0.01898	Cenpf
-1.372	2.148	0.005686	Gm30411
-1.369	0.5353	0.07228	Ccl2
-1.361	2.053	0.005481	ENSMUSG00000120673
-1.359	-0.07725	0.1842	Scnn1a
-1.357	1.833	0.1684	Lzts1
-1.353	2.676	0.02084	Gem
-1.345	2.985	0.2321	Gm12861
-1.336	2.261	0.009874	Gm30198
-1.336	3.708	0.002737	Marcksl1
-1.333	7.904	4.569e-06	Xpr1
-1.325	0.06359	0.1368	Gm9821
-1.324	2.254	0.006232	Nhp2
-1.321	1.683	0.0136	Hspb3
-1.317	3.428	0.1083	Fosb
-1.314	1.019	0.02748	Catsper3
-1.298	1.626	0.01962	Platr29
-1.286	3.662	0.0006488	Pdzrn4
-1.281	3.774	0.01943	Igfbp4
-1.27	5.875	1.466e-05	Cmtm8
-1.269	0.9221	0.03978	Crip1
-1.266	1.517	0.02625	Klf4
-1.259	1.234	0.03294	Gm50211
-1.259	3.14	0.05759	Ccl4
-1.254	1.211	0.03699	Gm34455
-1.253	1.759	0.02762	Hspa1a
-1.247	1.268	0.7395	Shroom4
-1.244	1.421	0.02351	Bex3
-1.234	0.5302	0.07878	ENSMUSG00000120240
-1.232	0.5795	0.08864	Ccdc8
-1.23	4.158	0.0004396	Rasgrp4
-1.23	6.019	0.3722	Gm12865
-1.229	2.09	0.03938	Trerf1
-1.224	1.476	0.04867	Lmna
-1.223	1.336	0.01126	ENSMUSG00000120546
-1.222	2.753	0.03966	Hmgn3
-1.218	3.043	0.1172	Ighd
-1.217	0.6549	0.3671	Gm48786
-1.213	1.77	0.1481	Ier2
-1.21	1.671	0.02739	ENSMUSG00000120313
-1.206	0.9982	0.03011	ENSMUSG00000120188
-1.204	2.367	0.009388	Capn1
-1.203	0.6228	0.1642	Brme1
-1.201	1.429	0.04816	Bcl2a1d
-1.2	3.967	0.004028	Slamf8
-1.197	3.777	0.03691	Ppp1r15a
-1.197	0.3953	0.1085	C330013E15Rik
-1.196	3.726	0.3344	Gpr165
-1.194	6.039	0.01324	Jun
-1.191	6.637	0.004598	Arhgap15
-1.191	0.4348	0.08473	Angptl1
-1.19	1.645	0.03027	Gm29811
-1.19	3.013	0.004197	Id2
-1.189	0.2954	0.7486	Gm10503
-1.188	5.371	0.00647	Zfp729a
-1.187	0.9998	0.0564	Smim35
-1.186	2.952	0.0343	Ildr1
-1.186	0.4841	0.1268	4933424G05Rik
-1.185	1.452	0.01898	Hyal2
-1.184	1.486	0.1559	Gm35507
-1.183	1.442	0.04348	9430041J12Rik
-1.181	3.68	0.001601	Zfyve21
-1.179	1.462	0.09999	Kntc1
-1.177	1.345	0.02702	Tob1
-1.177	0.3733	0.2218	Pitpnm2
-1.175	3.782	0.103	Gm37168
-1.173	2.719	0.08225	Or5v1
-1.172	5.286	0.1171	Gm27008
-1.17	1.27	0.8654	Kdm5d
-1.168	1.597	0.1172	Il1b
-1.167	0.9188	0.1205	Gm56077
-1.164	1.31	0.09017	Ier3
-1.157	5.08	0.6882	Msh5
-1.151	0.4261	0.1099	Cenps
-1.151	4.928	0.1326	Prkcq
-1.147	1.325	0.05391	Gm9484
-1.139	0.9038	0.03994	Art3
-1.139	3.388	0.01974	Socs3
-1.137	3.457	0.3823	Fgl2
-1.135	2.09	0.01691	Klf10
-1.134	0.7803	0.1497	Cct6b
-1.133	4.566	0.0001918	Fhad1
-1.132	1.462	0.03394	0610009L18Rik
-1.129	2.14	0.09541	Tnf
-1.129	1.077	0.2548	Cfhr2
-1.124	1.651	0.05	H4c4
-1.123	0.7363	0.06884	Gm43672
-1.121	4.457	0.0006488	Hmga2-ps1
-1.118	1.577	0.04053	Tlcd4
-1.115	1.756	0.008756	Gm41361
-1.111	1.524	0.03772	Etohd2
-1.111	0.5314	0.1337	Gm33524
-1.104	1.898	0.01067	Zfp536
-1.104	0.3092	0.2011	Gm12977
-1.094	3.781	0.006625	Tagln2
-1.092	0.6008	0.1474	Peak1os
-1.088	6.754	0.005481	Il1a
-1.081	3.798	0.0005211	Selenon
-1.08	1.351	0.05974	2310010J17Rik
-1.071	12.76	0.01977	Lars2
-1.067	0.3762	0.3971	Fahd1
-1.064	1.084	0.04198	Bola1
-1.063	5.828	0.002637	Gm49342
-1.063	1.193	0.14	Gstm5
-1.06	3.602	0.03691	Myc
-1.059	3.069	0.007661	2010013B24Rik
-1.057	1.874	0.1398	Pdgfc
-1.055	1.034	0.103	Emp3
-1.054	3.735	0.005865	Trib1
-1.053	0.6269	0.1523	Gm11755
-1.051	1.203	0.07776	4930486L24Rik
-1.051	3.925	0.09492	Ptger3
-1.048	5.43	0.00382	Igsf8
-1.045	5.145	0.0003428	Bzw2
-1.045	1.298	0.07228	Dnah2
-1.045	1.149	0.0785	A630001O12Rik
-1.044	3.496	0.601	Macrod2
-1.042	2.571	0.02734	4933433G15Rik
-1.038	3.034	0.01446	Gramd3
-1.034	1.663	0.041	ENSMUSG00000120931
-1.032	1.717	0.02295	Nsl1
-1.031	2.695	0.003606	Cnn2
-1.031	1.07	0.1005	Otud7a
-1.029	0.7349	0.08375	ENSMUSG00000120408
-1.028	7.174	0.457	Rn7sk
-1.027	6.602	0.008368	Tom1l1
-1.026	0.9645	0.08433	Gm36874
-1.025	1.231	0.07054	Itgad
-1.025	0.6968	0.1222	1700047A11Rik
-1.021	1.215	0.3064	Podxl2
-1.016	2.335	0.02621	Nox1
-1.015	2.207	0.009388	Zfp641
-1.014	1.43	0.1038	Brip1
-1.014	5.849	0.7459	Ccr6
-1.008	2.008	0.09223	Plekha4
-1.006	6.64	0.001863	Dusp6
-1.006	4.151	0.4001	Syt6
-1.006	1.434	0.5078	3830403N18Rik
-1.002	1.457	0.09941	ENSMUSG00000120435
-1.001	0.8495	0.2569	Gm14634
-0.9999	0.2841	0.4401	Gm42788
-0.9967	3.145	0.01221	Gm44710
-0.9955	1.862	0.05101	Lhfpl4
-0.9954	6.887	0.0004396	Gpr183
-0.9953	0.7115	0.1108	A530013C23Rik
-0.993	3.051	0.008182	Fam167b
-0.9921	4.181	0.01369	Epha2
-0.9909	1.567	0.2266	Adamts17
-0.9902	4.304	0.002547	Mcc
-0.9874	2.699	0.02194	Hes1
-0.9873	1.661	0.0397	Ppp1r3d
-0.9865	0.5251	0.1212	Tcf7l1
-0.9807	6.461	0.02152	Bcl2
-0.9796	1.622	0.7831	ENSMUSG00000120679
-0.9772	8.562	0.0006043	Ssbp2
-0.9755	0.8789	0.06151	1700113A16Rik
-0.9735	3.153	0.0722	Ly6m
-0.9689	5.431	0.9036	Xist
-0.9683	0.6211	0.4284	Zfp811
-0.968	2.155	0.0334	Gm14023
-0.9669	1.764	0.09172	Aprt
-0.9664	2.646	0.01446	Odc1
-0.9627	1.037	0.07579	Arf4os
-0.9608	9.04	0.06536	Gm15564
-0.9592	3.61	0.001443	Tmsb10
-0.9587	2.23	0.1948	Cage1
-0.9575	1.871	0.07315	Gla
-0.9562	3.014	0.01032	Tlcd2
-0.9553	4.923	0.00094	Pnp
-0.9527	3.203	0.3262	Arhgap6
-0.9502	5.18	0.000648	Nod1
-0.9501	2.476	0.01324	Ubiad1
-0.9486	2.734	0.1032	Fzd7
-0.9476	0.8305	0.05535	Gm37988
-0.9473	5.139	0.0001171	Gpx1
-0.9458	2.709	0.03171	Gm54867
-0.9439	0.6765	0.08266	ENSMUSG00000120113
-0.9433	5.553	0.007903	Tnfsf13b
-0.941	6.669	0.007661	Naalad2
-0.9405	1.345	0.0383	Phpt1
-0.9353	2.878	0.08454	Osm
-0.9338	1.259	0.0622	Il1r2
-0.9335	0.8252	0.09651	Selenoh
-0.9304	1.429	0.0691	ENSMUSG00000121177
-0.9299	0.3702	0.2512	Pnp2
-0.9272	0.7852	0.1038	ENSMUSG00000120387
-0.9241	3.897	0.009277	Gm31243
-0.9197	2.983	0.02606	Cstb
-0.9194	0.702	0.06768	2700038G22Rik
-0.9191	2.751	0.152	Ctla2b
-0.9187	1.308	0.141	Gstp1
-0.916	2.021	0.07854	Gm36445
-0.9158	5.607	0.005859	Ppp1r10
-0.9141	1.978	0.02351	H2-Oa
-0.9095	1.641	0.03152	Lratd2
-0.9065	-0.01856	0.3345	Ribc1
-0.9061	0.5144	0.128	Gm20663
-0.9047	0.7956	0.1648	Rita1
-0.9044	6.71	0.5515	Gatm
-0.9042	3.106	0.2581	Heg1
-0.9039	0.7553	0.1441	Mybph
-0.9017	1.306	0.1797	Kif1a
-0.9015	0.1804	0.2029	2810414N06Rik
-0.9002	1.272	0.1101	Rapgefl1
-0.898	0.455	0.2301	Erp27
-0.8978	1.338	0.03905	Rnf113a2
-0.8977	3.304	0.006349	2310022B05Rik
-0.8969	6.838	0.083	Ctnnd2
-0.8962	3.389	0.3184	Itgax
-0.8956	3.502	0.003085	Phospho1
-0.8918	2.557	0.04192	Cnpy4
-0.8892	2.834	0.0383	Atp5e
-0.8885	4.515	0.01747	Nectin2
-0.8847	4	0.03634	Notch4
-0.8839	4.397	0.09917	Naaa
-0.8831	4.784	0.0001974	Plau
-0.8831	0.3823	0.1542	Fbxo40
-0.8828	5.658	0.006232	Map3k20
-0.8818	4.074	0.002541	Ets2
-0.8804	0.9894	0.1107	Gm6654
-0.8779	4.381	0.01592	Masp1
-0.8754	2.155	0.1474	Mif
-0.8742	1.971	0.04636	Thap6
-0.872	3.29	0.01627	Txnl4a
-0.871	4.758	0.006408	A630089N07Rik
-0.8702	2.345	0.05215	Uqcr10
-0.8694	1.3	0.08256	Dusp18
-0.8676	0.3704	0.3449	Gm20033
-0.8668	3.045	0.02988	Tceal9
-0.8646	0.9381	0.06314	Alkbh7
-0.8635	3.385	0.01201	2810013P06Rik
-0.8621	6.998	0.05085	Etv5
-0.8621	0.9058	0.2162	Gm49793
-0.862	5.181	0.01148	Ppia
-0.8619	3.622	0.005481	Ndufa4
-0.8618	3.073	0.02406	Plppr4
-0.8545	2.018	0.8343	Tmem181c-ps
-0.8542	3.868	0.04899	Smad6
-0.8518	3.171	0.04677	H1f4
-0.8504	3.051	0.2707	Tnfsf8
-0.8501	2.349	0.04484	Lipc
-0.8472	3.484	0.04597	Sgsh
-0.8471	1.933	0.04654	Xkr4
-0.8469	0.724	0.1548	Gm4285
-0.8453	4.924	0.006349	Junb
-0.8437	1.233	0.3082	Impg2
-0.8414	2.119	0.1033	Samd1
-0.8411	2.489	0.03689	ENSMUSG00000120261
-0.8395	0.8957	0.1843	Polq
-0.8368	1.189	0.185	Gm32699
-0.8363	0.9845	0.1276	Gm13008
-0.8361	1.552	0.1727	Ghr
-0.8353	2.316	0.04056	Prr5
-0.8309	5.416	0.0009251	Sox4
-0.8306	2.748	0.08219	Gm37876
-0.828	0.7353	0.133	Commd5
-0.8272	2.903	0.1744	Dusp1
-0.8267	0.7004	0.1681	A330035P11Rik
-0.8266	2.98	0.03613	Krtcap2
-0.8254	3.979	0.01242	Gm47469
-0.8254	0.6451	0.24	A430035B10Rik
-0.8242	0.9397	0.2022	Polr2i
-0.8239	2.466	0.4793	Diaph3
-0.8234	6.082	0.01147	ENSMUSG00000120580
-0.8225	1.331	0.09841	Gm48882
-0.8224	2.717	0.02909	Trappc2l
-0.8195	2.656	0.02351	9130019P16Rik
-0.818	7.147	0.01374	Ipcef1
-0.8178	0.8622	0.1613	4930404A12Rik
-0.8175	1.584	0.06932	Riox1
-0.8173	3.56	0.009362	Oaf
-0.8158	2.624	0.1725	Adtrp
-0.815	1.861	0.0289	Gm38250
-0.8134	3.88	0.01959	Rpl36
-0.8134	5.75	0.01446	1700025G04Rik
-0.8125	1.654	0.08091	Gm37305
-0.8107	3.52	0.009878	Prdm5
-0.8096	1.405	0.09475	Praf2
-0.807	1.039	0.1405	Ddah1
-0.8067	5.263	0.002177	Ier5
-0.8064	3.331	0.01349	Glrx
-0.8048	1.675	0.07307	Gm50240
-0.8037	2.353	0.06387	Eaf2
-0.8034	2.146	0.2256	Etl4
-0.8026	2.285	0.08218	Snhg8
-0.7996	6.197	0.02124	Mir142hg
-0.7986	4.976	0.006625	Irf2bpl
-0.798	4.333	0.002541	Slc66a1
-0.7979	4.383	0.8341	Gm26992
-0.7969	11.59	0.008877	Cst3
-0.7968	3.231	0.03626	Bcl2a1a
-0.7948	0.4225	0.4678	4921511I17Rik
-0.7946	2.414	0.05194	Med11
-0.7946	3.106	0.1651	H1f2
-0.7935	3.417	0.09917	Gm41804
-0.7909	2.75	0.01967	Gm45777
-0.7906	2.943	0.02988	Zfp458
-0.7906	2.391	0.08486	Egr1
-0.7901	3.75	0.01042	H2az1
-0.79	0.5924	0.2529	ENSMUSG00000120749
-0.7888	1.264	0.1237	Gm26533
-0.7888	3.02	0.1466	Dab2ip
-0.7884	4.872	0.001753	Lfng
-0.7874	3.885	0.07147	Klhdc8b
-0.787	0.9459	0.09492	Cacna1s
-0.7852	5.409	0.03881	Ubb
-0.7846	2.797	0.07956	Gm55604
-0.7842	2.994	0.04692	Ccr2
-0.7839	3.34	0.01517	Nxpe3
-0.7836	6.285	0.01268	Cd34
-0.7821	1.267	0.09882	Catip
-0.781	5.496	0.103	Rps29
-0.7808	6.704	0.02636	Pea15a
-0.7781	2.881	0.198	Gvin3
-0.7768	2.259	0.08195	Gimap9
-0.7765	0.8672	0.1689	Cstad
-0.7748	1.422	0.448	Cchcr1
-0.7741	2.055	0.05843	Mrpl36
-0.774	3.558	0.007938	Otud1
-0.7715	0.8959	0.1661	Ripk3
-0.7711	0.7266	0.2086	Gm6548
-0.771	2.395	0.09068	Tor2a
-0.7697	6.099	0.01865	Hsp90aa1
-0.7697	4.742	0.103	Pcna
-0.7688	0.715	0.2022	Pard6g
-0.7675	1.654	0.06334	Sf3b5
-0.7674	2.591	0.0299	Pmaip1
-0.767	6.261	0.01218	Ube2e2
-0.7665	0.9237	0.09657	F8a
-0.7657	0.3976	0.2911	2310001H17Rik
-0.7643	0.8281	0.1721	Sbsn
-0.7641	1.755	0.122	Tubb6
-0.7638	1.199	0.07738	Ncr3-ps
-0.7632	8.422	0.0001746	Ccr5
-0.7627	1.012	0.108	Cntn1
-0.7616	3.433	0.2965	Gm15880
-0.7611	4.669	0.03006	Rpl35a
-0.7611	0.7685	0.2024	Gm14167
-0.7606	1.031	0.3708	Dtl
-0.7588	3.585	0.113	Isyna1
-0.7583	6.151	0.001516	Actg1
-0.7581	2.479	0.0785	Tuba1c
-0.7549	6.469	0.0004396	Bhlhe41
-0.7543	5.883	0.07116	Rasgef1b
-0.7541	0.4741	0.2108	Gm49969
-0.7539	5.873	0.0001955	Tgm2
-0.753	0.7585	0.3744	Nphp4
-0.7521	7.884	0.003085	Rin2
-0.7512	0.7156	0.1983	Apobec2
-0.7501	0.8606	0.1474	Prr7
-0.7467	0.575	0.2185	Gm49417
-0.7464	2.908	0.04816	Tmcc3os
-0.7463	5.229	0.0004396	Pdia5
-0.7462	5.572	0.007524	Btg2
-0.7434	3.626	0.009947	B4galnt1
-0.7427	2.141	0.05409	Ube2s
-0.7423	2.092	0.1028	Mtln
-0.7417	2.84	0.03794	ENSMUSG00000120693
-0.7412	3.842	0.01813	BC031181
-0.7408	4.288	0.01096	Jam3
-0.7403	1.398	0.2335	Eno4
-0.7399	1.995	0.4001	Gm21798
-0.738	1.192	0.2144	Rnft2
-0.7362	0.8922	0.124	ENSMUSG00000120684
-0.7348	2.57	0.03358	Mrps34
-0.7348	0.9658	0.1	Gm17092
-0.7338	8.167	0.0004396	Atg10
-0.7335	2.784	0.1088	Gm37229
-0.7332	5.988	0.03881	Gcnt2
-0.7326	2.422	0.05664	Tmem160
-0.7323	1.491	0.07996	Gm53028
-0.7322	1.08	0.1212	Phf11c
-0.7304	1.885	0.1199	Gm4117
-0.7286	4.251	0.09047	Pilra
-0.7284	2.756	0.1108	Rpl36al
-0.7282	3.982	0.05587	Pirb
-0.7276	1.643	0.09999	Tmem251
-0.7266	4.485	0.005865	Lbh
-0.7259	1.377	0.1033	Gm20492
-0.7258	1.113	0.3617	Fstl4
-0.7256	1.344	0.1181	Mrpl57
-0.7253	2.918	0.08436	Nme1
-0.7249	1.343	0.1736	Gadd45g
-0.7248	4.516	0.005481	Gm21988
-0.7248	3.319	0.06854	C1qbp
-0.7246	2.776	0.1601	Ermap
-0.7246	3.937	0.7548	Cacnb4
-0.7215	3.441	0.2275	Lmtk2
-0.721	9.218	0.2159	Il31ra
-0.7208	1.543	0.1299	Kcnj16
-0.7203	7.553	0.007105	Slc2a5
-0.7184	0.9326	0.1836	Gm47272
-0.7179	3.619	0.04651	Oprm1
-0.7178	3.436	0.0116	Gm20721
-0.7144	0.9787	0.1909	Alcam
-0.7144	0.6702	0.3812	Gm44751
-0.7133	0.8124	0.177	Gm15326
-0.7129	3.251	0.01865	Higd2a
-0.7124	2.71	0.04692	Emc6
-0.7112	3.47	0.02597	Gm15441
-0.7097	4.953	0.05577	Rps6
-0.7084	2.147	0.1003	Nudt18
-0.7083	3.931	0.07542	Arhgef3
-0.708	2.39	0.0822	Thap1
-0.7051	3.632	0.01078	Gpr35
-0.704	1.7	0.07299	Med29
-0.7031	2.489	0.06215	Ogg1
-0.7031	1.396	0.2792	Lhfpl3
-0.7025	2.196	0.108	Gm50399
-0.7022	4.926	0.01147	Rpl9
-0.7016	1.58	0.1937	4833438C02Rik
-0.7015	0.8899	0.4313	Rhbdl3
-0.6998	9.666	0.00965	Tmsb4x
-0.6991	2.129	0.1564	Gp9
-0.699	1.827	0.2343	Timeless
-0.6988	1.422	0.2012	Tnni2
-0.6987	0.9809	0.1971	Slc35e4
-0.6984	2.814	0.6086	Gm12166
-0.6978	2.283	0.04786	Coa3
-0.6978	4.576	0.004456	Osgep
-0.6975	2.23	0.07205	Bard1
-0.697	1.168	0.2086	Nim1k
-0.6969	1.335	0.1432	B3galt2
-0.6965	1.085	0.1916	Gm37401
-0.6963	3.605	0.01829	Hmgb2
-0.6962	1.08	0.1559	Gm41396
-0.6944	2.734	0.2849	Cdk2ap2
-0.6941	5.115	0.3696	Lrguk
-0.694	2.684	0.03386	Nup210l
-0.6937	3.685	0.1129	Erc1
-0.6933	1.176	0.249	Gm49893
-0.6902	6.298	0.00965	Sfi1
-0.6895	2.281	0.1033	Nop10
-0.6894	5.731	0.02507	Rpl17
-0.6893	5.393	0.108	Rpl8
-0.6889	1.648	0.2711	4930479D17Rik
-0.6887	6.367	0.0002256	Evi2
-0.687	1.882	0.1323	Imp3
-0.6865	6.23	0.02491	Fads1
-0.6861	1.698	0.1522	Sik1
-0.6852	4.722	0.009096	Naa20
-0.685	4.37	0.006232	Tmem100
-0.685	1.103	0.162	Znhit2
-0.6848	2.859	0.03897	Mcrs1
-0.6839	5.121	0.05283	Hrh2
-0.6833	1.808	0.09743	Dnajc30
-0.6829	4.81	0.005137	Cdk5r1
-0.6829	4.734	0.002	Rab32
-0.6825	3.943	0.02735	Gpm6b
-0.6825	1.119	0.2536	Gm11464
-0.6821	2.846	0.1391	Mrps14
-0.6818	3.711	0.01808	Irf2bp1
-0.6809	3.022	0.1142	Gm19708
-0.6807	2.89	0.02913	Uqcc2
-0.68	4.712	0.03994	Tmem176a
-0.6798	3.938	0.02094	Nfkbib
-0.6798	1.239	0.2403	1700001K23Rik
-0.6795	1.549	0.2017	Tmem223
-0.6781	6.795	0.0006488	Tspan13
-0.678	3.149	0.1743	Baiap2
-0.6779	5.428	0.03386	Ccl6
-0.6773	2.722	0.04786	Trmt10c
-0.6771	5.449	0.02117	Rpl11
-0.6768	0.9239	0.1674	Gm43909
-0.6755	2.534	0.04455	Mrto4
-0.6751	3.528	0.02359	Cyc1
-0.6748	1.363	0.159	Cd72
-0.6748	2.102	0.168	Dlgap1
-0.6746	1.781	0.07535	Exosc4
-0.6734	1.912	0.1527	2810402E24Rik
-0.673	3.421	0.03358	Prelid1
-0.6729	11.32	0.1604	Gphn
-0.6724	3.188	0.02359	Gm16332
-0.6714	2.183	0.0534	Dph3
-0.6705	2.937	0.06282	Nr4a1
-0.6701	5.269	0.007346	Morrbid
-0.6687	1.383	0.1081	Map2
-0.6683	2.962	0.09841	A930024E05Rik
-0.6679	2.505	0.1802	ENSMUSG00000120360
-0.6664	4.125	0.04919	Rpl38
-0.6663	4.652	0.01627	Myl12a
-0.6662	6.042	0.0603	Hspa12a
-0.6658	1.871	0.07419	Gm39214
-0.6654	0.8422	0.1812	Phex
-0.6649	5.409	0.152	Rps11
-0.6646	1.125	0.2791	Gm26826
-0.6641	1.507	0.2274	Gm10076
-0.664	2.881	0.06364	Taf13
-0.6634	5.866	0.03685	Sgip1
-0.6628	1.002	0.2878	Gm43221
-0.6625	0.7822	0.2504	A3galt2
-0.6623	1.527	0.2057	A930014D07Rik
-0.6621	2.04	0.2342	Egf
-0.6612	0.8014	0.1698	4930506C21Rik
-0.6603	4.898	0.1268	Plekhh2
-0.6599	7.474	0.01305	Hspa8
-0.6596	1.249	0.3931	Smoc1
-0.6592	2.942	0.9277	Uty
-0.6574	2.742	0.06215	Tmem60
-0.6567	9.182	0.006232	Plek
-0.6567	2.642	0.07353	Cycs
-0.6566	3.179	0.1108	Spata7
-0.6565	2.994	0.08345	Tomm22
-0.6558	0.8926	0.3451	Hps6
-0.6546	4.962	0.01066	Mdh1
-0.6544	2.442	0.1005	Relt
-0.6541	0.5115	0.3602	Gm5547
-0.654	3.155	0.1142	Ltv1
-0.6539	6.018	0.1464	Rplp1
-0.6537	4.451	0.01351	Rnf24
-0.6516	1.54	0.2386	Zdhhc12
-0.6504	1.257	0.1994	Gm38162
-0.6495	4.688	0.0397	Tuba1b
-0.6492	5.564	0.05939	Furin
-0.6489	5.92	0.05031	Srgn
-0.6486	4.693	0.008604	Cdk5rap1
-0.6482	1.898	0.1406	Gm16897
-0.6477	5.987	0.008795	Btg1
-0.6476	4.721	0.005848	Gm49368
-0.6475	4.106	0.23	Sdf2l1
-0.6466	1.983	0.5028	Rapgef4
-0.6461	7.891	0.0008549	Ctsc
-0.6457	16.72	0.01093	Rn18s-rs5
-0.6451	1.916	0.1961	Gm37334
-0.6441	4.982	0.002941	Kcnj2
-0.6439	3.939	0.1642	Gm8091
-0.6435	4.22	0.06334	Rpl36a
-0.6429	1.702	0.218	Cacnb1
-0.6426	2.126	0.1301	Ptrhd1
-0.6426	3.076	0.1822	Gm49393
-0.642	6.409	0.01097	Zfand5
-0.6403	8.022	0.005069	Tnfrsf21
-0.6399	2.712	0.07581	Trmt112
-0.6399	2.707	0.1618	Gm9725
-0.6396	1.627	0.1565	Tmem132a
-0.6394	0.4557	0.3208	Samd10
-0.6392	2.584	0.2534	Cdkn1a
-0.6385	1.679	0.1613	Zfp960
-0.6384	3.401	0.08473	ENSMUSG00000121207
-0.6383	2.07	0.105	Tstd3
-0.6382	0.8002	0.326	Bbof1
-0.6379	1.357	0.1517	Gm50250
-0.6377	3.006	0.03985	Slc10a3
-0.6367	4.847	0.03885	Ifi30
-0.6355	0.7915	0.2565	Kti12
-0.6348	1.189	0.1885	Gm10640
-0.6339	3.36	0.01482	Ubl4a
-0.6338	4.123	0.07776	Nfkbid
-0.633	1.455	0.1861	Marchf10
-0.6322	4.506	0.02478	Ccdc62
-0.6316	0.602	0.2029	Ddt
-0.6314	1.738	0.1771	E030042O20Rik
-0.6313	0.2214	0.4021	Gm39149
-0.6312	2.691	0.07749	Cbwd1
-0.6312	1.657	0.3219	Thoc6
-0.6304	4.689	0.07319	Rps17
-0.63	2.988	0.02621	Ptp4a1 - ENSMUSG00000026064
-0.6297	2.945	0.06314	Hmox1
-0.6294	6.071	0.001175	Ccnd1
-0.6293	1.576	0.1254	ENSMUSG00000120171
-0.6288	0.6797	0.605	C4b
-0.6287	5.207	0.02359	Manf
-0.6287	2.403	0.1005	Gm45472
-0.6287	4.027	0.3121	Rpl39
-0.628	3.923	0.04677	Ssr2
-0.6275	2.585	0.07319	Yif1a
-0.6271	2.58	0.4185	Il18rap
-0.6268	2.044	0.09841	Nudt19
-0.6268	2.029	0.1172	9630010A21Rik
-0.6267	5.326	0.01517	Dnajb4
-0.6263	1.435	0.2144	Rnf227
-0.6261	1.016	0.2699	9530052E02Rik
-0.6259	4.957	0.05298	Rpl31
-0.6249	0.9289	0.2144	Adat2
-0.6233	4.562	0.02061	Errfi1
-0.6233	1.302	0.2708	Gins2
-0.6228	9.114	0.05537	Filip1l
-0.6224	1.505	0.2094	Ctnna3
-0.6212	6.855	0.001175	Ogfrl1
-0.6212	3.707	0.1097	Nme2
-0.6201	5.121	0.01545	Mrfap1
-0.6199	1.891	0.1521	Mien1
-0.6198	3.879	0.07048	Gimap6
-0.6191	1.719	0.1462	Dohh
-0.6188	1.687	0.1583	Rilpl2
-0.6182	3.14	0.04867	Gm9949
-0.6177	3.341	0.07142	Oat
-0.6177	1.058	0.3198	C030037D09Rik
-0.617	4.795	0.007636	Jund
-0.6163	5.567	0.01747	Gm21970
-0.6157	4.433	0.008307	Rpl18
-0.6139	5.984	0.08265	Dusp16
-0.6137	1.426	0.1776	Cyb561d2
-0.6135	4.945	0.254	Cass4
-0.6132	1.58	0.2215	0610012G03Rik
-0.6121	1.376	0.4973	Hormad2
-0.6118	5.492	0.2428	Rplp0
-0.6099	4.67	0.005481	Sptssa
-0.6098	6.474	0.002547	Mapkapk2
-0.6091	6.065	0.005331	Evi2a
-0.6086	1.608	0.2295	Cdt1
-0.6081	3.401	0.03201	Psmb6
-0.608	0.929	0.367	Map4k1
-0.6077	3.021	0.04868	Mrpl18
-0.6076	7.833	0.05607	Gcnt1
-0.6075	4.042	0.03901	Plk3
-0.6071	3.585	0.122	Chchd2
-0.6066	4.953	0.1232	Synj2
-0.6065	2.934	0.1375	Uqcrq
-0.6063	2.755	0.06151	Pcyox1l
-0.6061	2.538	0.528	Smco4
-0.6059	1.79	0.1971	Gm47962
-0.6058	4.977	0.004598	Denr
-0.6044	2.319	0.1621	Gm12474
-0.604	1.65	0.1221	Tpm3-rs7
-0.603	2.848	0.03469	Nenf
-0.6022	3.638	0.03455	Dipk2a
-0.6016	5.395	0.2581	Rpl32
-0.6015	3.876	0.025	Cox6c
-0.6015	7.443	0.005025	Spred1
-0.6015	5.339	0.1806	Rpl26
-0.6005	9.796	0.1841	C1qa
-0.6004	2.997	0.07542	Cops9
-0.6	1.985	0.1363	Gm16192
-0.5997	0.987	0.2816	Mxra7
-0.5992	4.01	0.009842	Lrrc25
-0.5986	8.609	0.04769	Bank1
-0.5982	3.513	0.0785	Serpinf1
-0.5981	0.9932	0.3648	B3gnt7
-0.598	4.264	0.07463	Col25a1
-0.5973	1.368	0.2357	Castor1
-0.5962	3.355	0.08127	Mymk
-0.5961	3.39	0.02909	ENSMUSG00000120863
-0.5957	1.74	0.1938	Ppp1r3f
-0.5952	2.182	0.1532	Egr2
-0.5942	4.02	0.04692	Ckap4
-0.5932	0.9033	0.2167	Gm12319
-0.5929	2.451	0.107	Gm40117
-0.5924	3.08	0.08984	Patl2
-0.5924	0.7365	0.3016	4932422M17Rik
-0.5919	3.605	0.2307	Mcm4
-0.5917	4.213	0.1414	Rpl35
-0.5917	2.717	0.2268	Optn
-0.5914	2.268	0.1583	Hsd17b10
-0.5906	1.342	0.2285	Gpr68
-0.5904	0.9067	0.2611	Orc1
-0.5901	0.9933	0.254	ENSMUSG00000120329
-0.5901	1.887	0.254	Cpeb1
-0.5897	1.505	0.2682	Sag
-0.5888	5.734	0.03699	Dennd2c
-0.5884	9.011	0.001515	Rnase4
-0.5881	4.996	0.01303	Tpbgl
-0.5876	2.953	0.09238	Elob
-0.5875	3.917	0.03162	Atp6v1f
-0.5873	3.489	0.05318	Ddx19b
-0.5872	1.762	0.1962	Mrgpre
-0.5869	3.093	0.05194	Atp5g3
-0.5863	7.814	0.08076	Hspa5
-0.5858	2.361	0.1447	Gpn2
-0.5856	2.441	0.07503	Spr
-0.5855	0.551	0.4203	Atp9a
-0.585	3.169	0.2695	Mcm2
-0.5846	3.386	0.3617	Haao
-0.5843	3.594	0.05376	Spcs1
-0.5842	6.489	0.01772	Gng10
-0.584	7.337	0.003745	Slc15a3
-0.5839	1.516	0.1442	Cd247
-0.5838	2.384	0.1758	Ndufb11
-0.5824	0.6797	0.3362	Dpp6
-0.5819	6.923	0.003917	Tlr13
-0.581	2.998	0.09579	Pgp
-0.5805	4.929	0.263	Il7r
-0.5803	4.352	0.04061	Gm42962
-0.5802	2.412	0.0979	Ndufc1
-0.579	0.7958	0.3893	Gm44788
-0.5787	2.379	0.15	D730003I15Rik
-0.5773	1.435	0.3072	Lgalsl
-0.5761	3.817	0.05644	D630045J12Rik
-0.5756	1.281	0.2532	Ndufaf8
-0.5756	0.7549	0.4604	Gm12708
-0.575	6.526	0.005572	Soat1
-0.5746	4.255	0.02625	Paqr3
-0.5742	6.206	0.1136	Rap1gap2
-0.5741	7.86	0.005447	Med12l
-0.5741	2.459	0.166	Tomm7
-0.5735	5.645	0.2174	Rpl13
-0.5727	4.224	0.1173	Gsdme
-0.5725	1.878	0.1574	Dctpp1
-0.5715	1.772	0.2183	Hcfc1r1
-0.5711	5.22	0.01324	Ppib
-0.571	5.315	0.1056	Rps27a
-0.5707	1.132	0.2707	Smim36
-0.5701	2.86	0.1516	Trappc1
-0.57	2.521	0.1052	Zfp46
-0.5695	0.6531	0.3395	Fbxo48
-0.5693	7.982	0.006612	Gnas
-0.5683	9.062	0.1989	Mir6236
-0.5683	0.8961	0.258	ENSMUSG00000120996
-0.5679	0.8461	0.3042	Gm11805
-0.5677	2.405	0.149	A130010J15Rik
-0.5675	7.476	0.01351	Tspan18
-0.5674	4.009	0.04348	Cox8a
-0.5671	3.979	0.025	Saysd1
-0.567	4.89	0.1465	Prdx1
-0.567	5.894	0.2064	Rps8
-0.5663	4.462	0.007218	Tsen2
-0.5652	1.152	0.4165	Chaf1a
-0.5649	5.564	0.06314	Rpl10
-0.5648	8.999	0.003241	Cables1
-0.5647	6.346	0.008932	Etv1
-0.5643	5.329	0.01543	Zfp36
-0.5641	4.029	0.01351	Sde2
-0.5639	2.495	0.1751	Polr2j
-0.5634	7.414	0.005458	Myo1b
-0.5634	2.733	0.1652	Snhg1
-0.5633	3.919	0.03634	Pqbp1
-0.5633	5.981	0.008307	Klf6
-0.563	5.521	0.006388	Hhex
-0.5629	4.211	0.02698	Tuba1a
-0.5625	5.79	0.02272	Lat2
-0.5621	1.639	0.31	4933424M12Rik
-0.5613	3.041	0.06314	Sros1
-0.5612	2.54	0.2327	Sh2d4b
-0.5611	1.648	0.3001	Cd27
-0.561	2.353	0.09145	Gstt2
-0.5606	1.898	0.1354	Mecom
-0.5602	0.5997	0.4052	Adam8
-0.5599	3.475	0.022	Fkrp
-0.5594	1.588	0.1542	Gm20713
-0.5587	1.698	0.2627	Iqck
-0.5582	6.286	0.1019	Rpl21
-0.5576	4.456	0.2105	Rps16
-0.5574	4.722	0.09579	Rps19
-0.5569	2.7	0.1066	Gm7964
-0.5561	1.175	0.2318	Aplp1
-0.5558	1.477	0.2055	3300002A11Rik
-0.5557	5.573	0.01372	Drg1
-0.5557	10.59	0.004763	P2ry12
-0.5552	2.593	0.1702	Per2
-0.5542	3.779	0.1052	Cox6a1
-0.5539	5.404	0.0177	Tmed9
-0.5534	0.5728	0.3368	Gm43376
-0.5533	7.062	0.04919	Calm1
-0.5526	2.541	0.1626	Prkar1b
-0.5525	1.619	0.4566	Hdac7
-0.5523	7.124	0.1057	Klf7
-0.5517	6.191	0.04118	Gas6
-0.5515	4.025	0.05345	Tvp23b
-0.5514	1.287	0.1982	Dpm3
-0.5511	0.4439	0.3666	Wasf3
-0.5509	1.321	0.3209	Chchd5
-0.5505	0.5239	0.3313	ENSMUSG00000121066
-0.5501	3.196	0.1097	Csrnp1
-0.5501	1.681	0.1961	Polr2h
-0.55	1.468	0.2022	Bcas3os1
-0.5498	2.098	0.3222	Bcl3
-0.5491	7.993	0.003225	App
-0.5481	1.571	0.175	Scand1
-0.5476	1.396	0.3163	Opcml
-0.5476	1.107	0.4339	Gm17021
-0.5476	0.8136	0.4518	Gm10575
-0.5474	3.345	0.1217	Rpl15
-0.5473	3.005	0.1427	Sec61b
-0.5472	3.146	0.1206	Trim17
-0.5472	1.883	0.7951	Apob
-0.5463	0.9527	0.2697	Tnfsf13os
-0.5462	6.047	0.01056	Fam111a
-0.5462	2.666	0.09175	Surf1
-0.5458	3.252	0.04532	Snrnp35
-0.5451	5.164	0.01098	Nudc
-0.5451	3.751	0.05365	Dok3
-0.5451	2.381	0.09219	Btbd19
-0.5447	3.67	0.07116	Creld2
-0.5446	2.737	0.07721	Mrps11
-0.5441	5.415	0.01703	Dstn
-0.5441	4.934	0.01462	Kdm6b
-0.5439	3.914	0.02869	Tmx2
-0.5435	5.821	0.243	Rps23
-0.5432	0.8432	0.4456	Lilrb4a
-0.5427	2.809	0.05967	Aacs
-0.5418	3.282	0.1702	Gm44686
-0.5416	2.798	0.06054	Casp6
-0.5415	1.229	0.316	5930403N24Rik
-0.5407	1.691	0.2428	Ppif
-0.5407	5.195	0.2685	Rps7
-0.5405	11.05	0.007984	Actb
-0.5405	2.866	0.1976	Tmem276-zftraf1
-0.5405	2.801	0.2767	Iho1
-0.5402	5.085	0.0332	Snap29
-0.54	14.42	0.05	Cmss1
-0.5395	0.9309	0.2983	Htatip2
-0.5391	6.379	0.2341	Rps4x
-0.5389	1.75	0.1844	Hes6
-0.5388	5.12	0.01659	Mmp2
-0.5381	1.64	0.253	Coprs
-0.5376	4.465	0.01747	Bcl6
-0.5375	8.815	0.14	Kcnma1
-0.5374	5.095	0.1822	Rpl41
-0.5359	3.232	0.07609	Ndufa8
-0.5359	2.842	0.09566	Smpdl3b
-0.5356	3.534	0.0622	Rinl
-0.5351	2.544	0.08091	Sra1
-0.535	4.283	0.02734	Tor4a
-0.535	1.425	0.3088	Pold2
-0.5348	3.283	0.05435	Fam149a
-0.5346	4.267	0.01148	P2ry10b
-0.5343	4.689	0.02389	Arf6
-0.5342	3.433	0.07055	Tmem185b
-0.5336	6.673	0.02461	Alox5ap
-0.5335	5.328	0.01389	Txnrd1
-0.5334	1.107	0.3151	Ss18l2
-0.533	0.9272	0.3637	Mrm3
-0.5328	8.942	0.0004396	P2ry13
-0.5326	3.139	0.08864	Pigp
-0.5325	3.163	0.1758	Rpl22l1
-0.5318	3.85	0.05699	2410006H16Rik
-0.5318	0.7534	0.4386	Rad51ap1
-0.5314	2.128	0.1815	Hmbs
-0.5313	1.665	0.375	Ezr
-0.5311	0.8849	0.323	Lysmd1
-0.531	4.639	0.07048	Rpl34
-0.5309	2.435	0.1395	Insig1
-0.5308	3.48	0.08744	Rfk
-0.5307	3.589	0.03294	Rraga
-0.5305	1.951	0.2131	0610009B22Rik
-0.5305	0.7452	0.3543	Dcc
-0.5303	1.526	0.3073	Ada
-0.53	2.582	0.1826	Habp4
-0.5295	1.815	0.2207	Timm8b
-0.5293	6.726	0.001443	Commd8
-0.5292	0.7129	0.4615	Zfp433
-0.5291	2.867	0.06772	Med21
-0.5286	2.623	0.1797	Grid2
-0.5284	6.885	0.01725	Pfn1
-0.5273	5.331	0.0235	Prkab1
-0.5271	0.9628	0.3447	Gm42508
-0.5266	3.377	0.0603	Nabp1
-0.5263	3.866	0.04797	Cebpb
-0.5263	6.212	0.3968	Spred2
-0.526	1.019	0.2539	Pigyl
-0.5256	1.44	0.2232	Abcb1a
-0.5246	7.256	0.05332	Tyrobp
-0.5243	6.44	0.01974	Rnls
-0.5242	5.79	0.05911	Rpl5
-0.524	2.228	0.1193	Prxl2b
-0.524	4.314	0.2767	Rpl28
-0.5238	3.109	0.0676	Lamb2
-0.5237	3.387	0.1088	Mfsd5
-0.5223	9.575	0.005137	Tmem119
-0.5221	3.139	0.06654	Polr2g
-0.5221	2.799	0.157	Gm9929
-0.5218	5.044	0.1405	Rpl12
-0.5216	2.908	0.1605	Jagn1
-0.5215	6.071	0.03626	Tubb5
-0.5215	5.102	0.1668	Rps27
-0.5209	1.815	0.2477	Ank1
-0.5207	5.278	0.02648	Gabarap
-0.5206	4.329	0.03195	Nrbf2
-0.5205	4.028	0.1173	Zswim4
-0.5202	3.478	0.03653	Ring1
-0.52	5.986	0.005481	Lman1
-0.5199	4.936	0.03745	Selenos
-0.5197	1.525	0.236	Pycrl
-0.5196	6.016	0.14	Rpl18a
-0.5192	0.5852	0.3182	Gm20537
-0.5191	1.959	0.2318	Smim33
-0.519	6.113	0.07228	Lypd6
-0.5181	5.528	0.2538	Rps5
-0.5177	1.504	0.2362	Slc5a6
-0.5171	1.848	0.2862	Tmem97
-0.5169	3.05	0.1056	Mdp1
-0.5165	4.274	0.02478	Emc10
-0.5164	2.581	0.1515	Gm11476
-0.5162	5.884	0.2488	Fau
-0.5155	4.89	0.0235	Ctdspl
-0.5154	5.856	0.1024	Tmem176b
-0.5147	1.89	0.2815	Fbxo17
-0.5141	8.171	0.08557	Calr
-0.5139	3.126	0.1983	Cebpd
-0.5138	1.909	0.1442	Csmd1
-0.5138	0.3784	0.4555	Gm12868
-0.5132	5.061	0.0177	Leprotl1
-0.5132	4.135	0.06463	Prdx5
-0.5122	6.521	0.00673	Plod1
-0.512	3.851	0.05543	Gpx4
-0.5119	1.98	0.2017	Tssc4
-0.5116	1.009	0.3256	Trim43c
-0.5114	5.536	0.006349	Stk17b
-0.511	7.027	0.003982	Ptms
-0.511	2.77	0.2086	Capg
-0.5109	4.946	0.1393	Nfkbiz
-0.5107	0.7766	0.3309	Gm21985
-0.5102	3.104	0.1017	1500004A13Rik
-0.5098	5.435	0.01898	Spns2
-0.5098	7.74	0.002441	Atf6
-0.5097	2.542	0.1015	Zfp41
-0.509	0.7104	0.4819	Gm38293
-0.5087	1.304	0.2453	Ccdc121rt3
-0.5085	0.8481	0.495	Clmp
-0.5084	2.604	0.1218	Pdlim2
-0.5072	1.262	0.4429	9130019O22Rik
-0.5071	5.925	0.1999	Rpl23
-0.5069	5.179	0.008604	Mid1ip1
-0.5069	1.819	0.2402	Emp2
-0.5062	1.662	0.26	Snrpd2
-0.5062	0.7478	0.3783	C130013H08Rik
-0.506	5.237	0.07743	Plekho2
-0.5055	0.9571	0.5092	Cdc7
-0.5053	1.009	0.4625	Mrps12
-0.5052	2.049	0.2243	Vkorc1
-0.504	3.192	0.511	Ranbp3l
-0.5034	2.591	0.1864	ENSMUSG00000119955
-0.5032	5.116	0.2084	Rpl19
-0.503	6.323	0.01201	Csnk1g3
-0.5028	3.321	0.2512	Tnik
-0.5028	0.7146	0.5259	D430020J02Rik
-0.5026	7.277	0.018	Itm2c
-0.5024	2.283	0.09791	Naif1
-0.5007	2.967	0.1543	Kdr
-0.5006	6.534	0.05065	Coro1a
-0.5004	2.612	0.1721	Reep4
-0.5002	6.559	0.06254	P4hb
-0.5002	5.568	0.1337	Rps24
-0.4994	7.443	0.02214	Fcgr2b
-0.4991	3.66	0.1029	Sod1
-0.4989	6.74	0.02557	Sgk1
-0.4989	0.852	0.3384	Tmem42
-0.4987	2.616	0.1853	Gm13684
-0.4983	3.969	0.02443	Med7
-0.4982	9.753	0.00965	Klf12
-0.4973	2.589	0.1251	Adgb
-0.4973	2.736	0.3417	Tspo
-0.4971	3.446	0.07535	Ech1
-0.4965	4.804	0.2816	Rps15
-0.496	4.369	0.03328	Lrrc4
-0.4954	5.708	0.005845	9130015G15Rik
-0.4953	5.643	0.2716	Rpl14
-0.4952	1.646	0.2401	Fdx2
-0.4947	2.814	0.3495	Il1r1
-0.4946	1.214	0.2787	Gm36423
-0.4945	2.975	0.07587	Usb1
-0.4939	5.571	0.07891	Dnajb11
-0.4935	1.743	0.2969	Tnfrsf12a
-0.4929	2.215	0.2569	Romo1
-0.4925	1.143	0.3695	Acot2
-0.4923	4.321	0.2865	Got1
-0.4922	10.37	0.005572	Rapgef5
-0.4922	4.813	0.2315	Atp8b1
-0.4921	2.941	0.07542	Med16
-0.4921	2.625	0.1733	Ndufs6
-0.492	7.04	0.008715	Arl6ip1
-0.4917	2.409	0.3244	Rps27l
-0.4913	3.892	0.06307	Acvrl1
-0.4908	3.743	0.1952	Rpl27a
-0.4907	1.37	0.2581	Psmg3
-0.4905	4.934	0.03744	Hnrnph2
-0.4902	0.707	0.4325	Gm36529
-0.4901	2.493	0.2024	4933423P22Rik
-0.4896	1.459	0.3144	Rusc1
-0.4895	1.912	0.2925	Ppa1
-0.4893	2.947	0.1085	Gm4221
-0.4891	1.02	0.3912	Gm9993
-0.489	6.043	0.01163	Eloa
-0.489	1.642	0.2362	Fzd8
-0.4886	4.87	0.01907	Mlf2
-0.4886	1.301	0.2336	Syn3
-0.4885	6.488	0.007984	Sting1
-0.4879	5.907	0.01046	Gngt2
-0.487	5.476	0.03119	Cct6a
-0.4869	1.679	0.3258	Bola3
-0.4868	1.339	0.3321	AA474408
-0.4867	3.124	0.1374	Ormdl2
-0.4866	0.8957	0.3395	Nnat
-0.4864	5.461	0.0177	Slc25a25
-0.4851	4.91	0.04786	Prkcsh
-0.4851	0.5286	0.5259	Tiam2
-0.485	3.448	0.1876	Bmyc
-0.4849	0.7102	0.4201	Neurl2
-0.4847	6.609	0.006232	Wdr1
-0.4845	7.061	0.04765	Ralgps2
-0.4842	6.223	0.04919	Hnrnpab
-0.4838	7.492	0.006525	Tspan7
-0.4838	5.055	0.07307	Rps15a
-0.4837	2.639	0.1442	Zpbp
-0.4837	1.332	0.3184	Eva1b
-0.4835	3.308	0.03817	Oxsm
-0.4832	4.635	0.203	Rps21
-0.4831	2.47	0.5111	Reck
-0.4829	6.363	0.01959	Spcs2
-0.4828	3.367	0.1493	Pvr
-0.4827	1.754	0.2389	4921531C22Rik
-0.4826	4.78	0.02797	Nxt2
-0.4826	1.92	0.5138	Vstm4
-0.4823	2.292	0.1628	Fbxo6
-0.4821	1.483	0.5137	Cd200r4
-0.482	2.736	0.122	ENSMUSG00000121114
-0.4817	1.554	0.2364	Sox6
-0.4816	4.087	0.07415	Atp5h
-0.4816	3.609	0.116	Gm26759
-0.4815	5.113	0.06393	Rpl7
-0.4813	4.415	0.03464	Txndc5
-0.4812	3.427	0.07542	Psmb10
-0.4811	4.698	0.1563	Hmgn1
-0.481	5.789	0.02621	Hsd17b12
-0.4809	5.16	0.1062	Bcl2a1b
-0.4805	7.719	0.2022	A830008E24Rik
-0.4804	4.639	0.03312	Ppp1r3b
-0.4804	3.416	0.1115	Gng5
-0.4795	7.23	0.003504	Samsn1
-0.4793	3.666	0.2869	Mcm6
-0.4791	3.072	0.09238	Gm20089
-0.4778	1.958	0.2768	Pafah1b3
-0.4778	0.8459	0.4082	1700052K11Rik
-0.4774	3.113	0.07954	Anapc13
-0.4773	1.743	0.3511	Vsig10l
-0.4771	0.6203	0.4524	Fam174c
-0.4768	1.343	0.4026	Akap12
-0.4764	4.593	0.4663	Sh3rf1
-0.4763	7.792	0.1827	Hsp90ab1
-0.4763	1.304	0.411	Lefty1
-0.4755	2.501	0.1433	1810037I17Rik
-0.4753	1.083	0.5697	Itga4
-0.475	7.672	0.006072	Rhoa
-0.4741	1.453	0.2366	Gm20457
-0.474	1.887	0.2067	Nrcam
-0.4737	3.475	0.06463	Tmem106c
-0.4729	7.324	0.1796	Ftl1
-0.4728	1.993	0.2833	Sspn
-0.4727	0.8297	0.3585	Pakap - ENSMUSG00000038729
-0.4723	3.743	0.05832	Naf1
-0.4711	1.48	0.3272	Gm43809
-0.4706	0.5353	0.4624	Spon1
-0.4705	1.871	0.2329	4731419I09Rik
-0.4701	3.278	0.1166	Gpd1
-0.4701	0.5974	0.4849	E230016K23Rik
-0.4698	1.109	0.4201	Tbcc
-0.4697	1.682	0.2575	E130317F20Rik
-0.4695	6.884	0.007086	Pals2
-0.4691	4.739	0.1704	Ldha
-0.4689	2.086	0.2089	Pigbos1
-0.4688	5.54	0.04053	Prickle1
-0.4684	4.734	0.2827	Smim3
-0.468	3.612	0.07147	Hmgn2
-0.468	2.209	0.2767	Timm13
-0.4672	2.885	0.1766	6330403L08Rik
-0.4671	0.6653	0.4644	C920006O11Rik - ENSMUSG00000121490
-0.467	6.481	0.02753	Nova1
-0.467	2.577	0.1509	Tmem147
-0.4668	5.338	0.05283	Adrb2
-0.4667	2.116	0.3618	Mrpl12
-0.4666	7.009	0.02797	Arhgdia
-0.4662	2.35	0.2691	Triap1
-0.4657	2.225	0.2427	Exo5
-0.4651	8.938	0.06768	Hsp90b1
-0.4647	4.577	0.03023	Midn
-0.4646	3.455	0.3209	Cd274
-0.4643	1.505	0.2625	B230369F24Rik
-0.4642	3.273	0.1531	Rccd1
-0.4638	1.886	0.3511	Antxr2
-0.4637	4.109	0.1983	Rps28
-0.463	5.148	0.05365	Tnfaip3
-0.4625	0.8171	0.4888	Calhm6
-0.4624	1.473	0.3251	Rpp21
-0.4621	2.73	0.1721	4930473A02Rik
-0.4618	2.734	0.1628	Ppp1r14b
-0.4615	5.276	0.0214	Tspan3
-0.4608	2.499	0.2795	Zfand4
-0.4601	1.247	0.4199	Gm9800
-0.4596	2.917	0.2106	Gch1
-0.4595	2.568	0.124	Polr1h
-0.4594	4.707	0.07501	Paics
-0.4594	2.973	0.1143	Rab4a
-0.459	4.346	0.1996	Rps10
-0.4586	0.5404	0.455	Metrn
-0.4582	4.227	0.08896	Fam102a
-0.4576	1.076	0.3752	Gm34466
-0.4574	1.911	0.3001	Gm32552
-0.4572	2.284	0.2277	Smim12
-0.4565	1.705	0.3912	Tmem101
-0.4564	3.496	0.148	Sdhd
-0.4558	1.21	0.3892	Gm34907
-0.4556	2.821	0.2205	Cox5b
-0.4556	0.9292	0.6202	Lrrc27
-0.4554	6.014	0.2063	Rps3
-0.4553	3.641	0.05	Ciapin1
-0.4552	4.853	0.06539	Dnajb9
-0.4548	4.997	0.07538	Arrdc3
-0.4542	1.96	0.3195	Adam4
-0.4539	1.735	0.2751	Casp12
-0.4538	8.865	0.01366	Lims1
-0.4535	9.144	0.002612	Rtn1
-0.4531	6.58	0.194	Pdia6
-0.4525	2.761	0.1987	Gm44511
-0.4522	0.8436	0.4092	Magee1
-0.4513	0.4001	0.6395	Ikbke
-0.4511	3.826	0.05502	Gtf3c2
-0.4507	8.156	0.005845	Cap1
-0.4506	8.118	0.006349	Efhd2
-0.4506	4.288	0.1238	H2-Ob
-0.4505	6.74	0.003891	Fcgr1
-0.4499	4.742	0.09113	Eef1b2
-0.4499	5.105	0.2676	Gm12610
-0.4497	1.426	0.4185	2010310C07Rik
-0.4495	1.885	0.2889	Plekhh1
-0.4494	5.104	0.01201	Arl1
-0.4494	5.192	0.2959	Rpsa
-0.4493	5.351	0.02739	Sub1
-0.4493	3.52	0.07912	Trappc4
-0.4492	2.77	0.1681	Nsmce3
-0.4492	1.353	0.2811	Smarcd3
-0.4492	1.821	0.326	Ficd
-0.4487	4.467	0.03938	Nrep
-0.4483	6.141	0.3916	Rbpms
-0.4476	1.839	0.5516	Gpr65
-0.4474	2.356	0.5313	Gm28981
-0.4472	4.48	0.05871	Cstf2t
-0.4472	5.018	0.2244	D130009I18Rik
-0.4468	4.906	0.09127	Mgat2
-0.4468	1.55	0.4464	AV099323
-0.4464	1.61	0.4845	Lcmt2
-0.4462	2.053	0.2095	B3galt1
-0.446	0.8314	0.3812	Ceacam2
-0.4456	1.622	0.2906	ENSMUSG00000121151
-0.4455	4.817	0.2098	Myh10
-0.4451	4.028	0.04803	Coq10b
-0.445	4.395	0.04789	Tmem9b
-0.445	6.333	0.01067	Azin1
-0.4448	2.296	0.317	Gm14455
-0.4445	4.542	0.03691	Atf4
-0.4443	4.249	0.1191	Fkbp2
-0.444	0.9017	0.4326	Tmem231
-0.444	0.8969	0.6805	Pim1
-0.4439	6.658	0.01098	Arl4c
-0.4439	1.83	0.8044	Capza1-ps1
-0.4434	0.7689	0.5345	Cers1
-0.4433	2.894	0.2016	1700011L22Rik
-0.4432	4.2	0.04256	Cited2
-0.4431	0.7306	0.4505	Zfp772
-0.4429	5.442	0.01038	Cln8
-0.4429	2.062	0.2506	Dnm3
-0.4427	2.052	0.4502	Chchd1
-0.4421	2.82	0.241	Mindy4
-0.442	6.481	0.01203	M6pr
-0.442	3.24	0.155	Tma7
-0.4418	2.385	0.1871	Dcaf15
-0.4411	4.546	0.0683	Gm16599
-0.4411	4.561	0.08623	Oaz1
-0.4409	3.817	0.09236	Crlf2
-0.4409	2.713	0.156	1700126G02Rik
-0.4391	0.6752	0.5664	Gm12279
-0.439	6.055	0.2012	Eif1
-0.4389	2.231	0.308	Sap30
-0.4389	1.101	0.3887	E030030I06Rik
-0.4388	6.144	0.0202	Rybp
-0.4388	2.735	0.1909	Uqcr11
-0.4387	3.876	0.06314	Zfp386
-0.4387	0.7654	0.4456	D830050J10Rik
-0.4385	5.38	0.08255	Rps14
-0.4385	2.634	0.1937	Tmem141
-0.4383	1.137	0.3393	Nlrc3
-0.4382	2.742	0.2024	Pno1
-0.4382	2.976	0.2233	Bend3
-0.4381	10.36	0.008383	Sparc
-0.4381	0.9341	0.4446	Tgfb2
-0.438	2.176	0.3645	Dus4l
-0.4378	1.534	0.2769	Ppp1r13l
-0.4377	4.09	0.1661	Zc3h12a
-0.4376	3.034	0.1821	Cry1
-0.4375	1.858	0.3887	Acd
-0.4374	3.247	0.1736	Ddx39a
-0.4371	7.839	0.06887	Cd164
-0.437	2.727	0.2002	Atp5mpl
-0.4361	4.078	0.06327	Tmed2
-0.4361	4.173	0.2301	Ran
-0.4357	2.761	0.3152	Banf1
-0.4352	6.272	0.01898	Selenof
-0.4352	2.025	0.3484	Gm10676
-0.4351	5.672	0.1983	Rack1
-0.4349	5.654	0.4605	Epb41l3
-0.4348	5.529	0.03613	Adora3
-0.4342	3.587	0.1	Igtp
-0.4342	2.297	0.28	Nt5dc2
-0.4339	4.938	0.2144	Cox4i1
-0.4338	3.828	0.04765	Tesk1
-0.4338	8.671	0.2056	Pdia3
-0.4335	3.54	0.07147	Taf7
-0.4333	1.802	0.3761	Pole3
-0.4331	7.219	0.08265	Cfl1
-0.4329	3.821	0.1158	Cd151
-0.4329	2.481	0.2268	Alg3
-0.4326	4.075	0.08697	Btf3
-0.4325	5.227	0.2456	Rpl7a
-0.4324	4.816	0.02376	Rab1b
-0.4321	8.418	0.006349	Bin2
-0.4309	1.069	0.5187	Gm31728
-0.4306	5.001	0.02734	Myadm
-0.4299	1.253	0.3772	Nanos1
-0.4298	3.701	0.1432	Dpagt1
-0.4294	4.257	0.04085	Ppp1r11
-0.4291	5.563	0.03259	Prps2
-0.4291	0.6082	0.6282	Gm11725
-0.429	2.302	0.2599	Smim8
-0.4289	3.683	0.1707	Srp14
-0.4288	2.714	0.1603	Prkcz
-0.4288	0.9484	0.4351	Fbxo24
-0.428	0.5107	0.5511	ENSMUSG00000120539
-0.4279	1.635	0.4938	Tuft1
-0.4278	6.682	0.2978	Tbc1d4
-0.4275	4.528	0.03913	Slc25a11
-0.4269	5.887	0.09676	Serp1
-0.426	11.07	0.1474	Ctss
-0.4254	0.4041	0.4961	Slc25a54
-0.4252	2.461	0.2496	Svbp
-0.4251	1.928	0.2488	4930470G03Rik
-0.4244	3.786	0.09835	2410002F23Rik
-0.4243	1.749	0.2889	B230217O12Rik
-0.424	1.263	0.4943	ENSMUSG00000120322
-0.4239	1.652	0.347	Map10
-0.4238	3.593	0.07881	Grcc10
-0.4238	2.753	0.1357	Zfp518b
-0.4233	1.126	0.4179	Mad2l1bp
-0.4233	0.859	0.4337	Pop7
-0.423	2.788	0.1976	Pde12
-0.4228	3.423	0.1517	Etfb
-0.4226	3.324	0.1387	Pdcd5
-0.4226	2.442	0.1984	Gm15527
-0.4224	3.756	0.1439	Adgrl1
-0.4223	5.924	0.06282	Pcbp1
-0.4219	1.819	0.313	Ccnq
-0.4218	10.66	0.006232	Lgmn
-0.4214	4.928	0.05644	Rps2
-0.4211	1.305	0.5968	Pim3
-0.4208	4.523	0.2581	Rps20
-0.4206	3.898	0.08223	Lypla2
-0.4205	4.115	0.03685	Atxn7l3
-0.4203	5.738	0.0607	Xbp1
-0.4202	6.565	0.05606	Bsg
-0.4197	2.561	0.2002	Tceal1
-0.4197	2.499	0.2783	Gm38604
-0.4194	5.325	0.2797	Rpl37
-0.4187	0.6964	0.4917	Lnx1
-0.4181	1.049	0.395	Tmem177
-0.4181	0.9771	0.5119	Slc9a5
-0.4178	6.446	0.07147	Eprs
-0.4176	1.547	0.3887	Anks1b
-0.4174	3.476	0.203	Cox5a
-0.4172	2.801	0.5854	Gm26862
-0.4171	4.532	0.03358	Pgrmc1
-0.4171	7.351	0.006349	Ifnar2
-0.4169	4.349	0.03527	Gm31763
-0.4169	1.671	0.3041	Ncam2
-0.4167	9.951	0.01149	Marcks
-0.4166	2.204	0.3185	Tmem216
-0.4165	4.771	0.03598	Eps8
-0.4163	2.907	0.1994	Timm22
-0.4163	1.457	0.5329	Slc43a3
-0.4162	2.854	0.1775	Pla2g12a
-0.4159	3.62	0.1108	Uqcrb
-0.4159	2.409	0.2108	Zfp51
-0.4159	4.737	0.3426	Rps25
-0.4158	4.689	0.05699	Ccng1
-0.4158	2.873	0.1771	6330418K02Rik
-0.4154	1.777	0.2918	Guk1
-0.4154	1.624	0.354	Cutc
-0.4153	7.551	0.06263	Vps41
-0.4148	2.414	0.2469	9330133O14Rik
-0.4145	8.808	0.03604	Canx
-0.4145	5.42	0.05349	Fuca1
-0.4143	2.428	0.2435	Exosc3
-0.4142	8.134	0.0046	Adgre1
-0.4142	7.37	0.1456	Bcl2l1
-0.4142	3.663	0.1974	Bahcc1
-0.414	1.873	0.3089	Pex12
-0.4139	4.049	0.1002	Mydgf
-0.4139	0.8358	0.3834	Trim45
-0.4138	2.712	0.3858	Dnajc9
-0.4137	4.777	0.04539	Rcn2
-0.413	7.075	0.004077	Ndfip1
-0.4127	4.319	0.1331	Park7
-0.4125	0.7336	0.5623	Ubb-ps
-0.4121	5.22	0.177	Hebp1
-0.412	1.695	0.3321	Ccdc73
-0.4119	2.688	0.1608	Zbtb22
-0.4119	3.228	0.2716	Gm33370
-0.4119	1.297	0.3963	Clmn
-0.4117	2.265	0.4697	Ciao2b
-0.411	3.025	0.2192	Ddah2
-0.4108	10.21	0.0168	Selenop
-0.4106	3.141	0.2141	Camkk1
-0.4106	5.011	0.2295	Rpl37a
-0.4106	0.9777	0.3878	Pmm1
-0.4105	4.258	0.09801	ENSMUSG00000120081
-0.4102	5.247	0.01997	Gm44250
-0.4102	2.396	0.2257	Catsper2
-0.4099	5.044	0.03061	Cldnd1
-0.4099	3.283	0.2751	D8Ertd738e
-0.4098	3.759	0.1108	Get3
-0.4096	3.234	0.1103	Flt1
-0.4095	6.996	0.01096	Laptm4a
-0.4093	4.835	0.2813	Rps26
-0.4092	5.426	0.4356	Tpt1
-0.4091	3.797	0.308	A930007I19Rik
-0.4089	4.475	0.08662	Cd276
-0.4088	2.665	0.1664	Toe1
-0.4085	2.895	0.1591	Rpl37rt
-0.408	4.544	0.08154	Ssr4
-0.4079	4.364	0.1997	Irs2
-0.4077	6.631	0.0235	Slc44a2
-0.4077	11.57	0.1603	Camk1d
-0.4076	4.153	0.05	Ddx54
-0.4076	0.7275	0.4829	Gm45842
-0.4074	5.054	0.02503	Tspan31
-0.4073	5.683	0.01512	Lman2
-0.4073	3.415	0.2185	ENSMUSG00000120144
-0.4073	8.838	0.3947	Eef1a1
-0.4071	1.714	0.4407	Dhfr
-0.4069	3.812	0.1792	6030468B19Rik
-0.4068	6.281	0.02351	Vps37b
-0.4067	3.975	0.1486	Stub1
-0.4066	2.747	0.5938	Mcm5
-0.4064	5.697	0.1688	Rplp2
-0.4064	2.539	0.2308	Atp5g1
-0.406	6.032	0.009874	Usp22
-0.406	4.043	0.1672	Eif3g
-0.4059	2.435	0.1965	Inafm2
-0.4058	3.112	0.2705	Smim30
-0.4055	2.994	0.1978	Vopp1
-0.4051	2.157	0.3088	Gm11084
-0.4051	0.4093	0.6778	Srgap1
-0.405	1.196	0.4936	Ube2d-ps - ENSMUSG00000121496
-0.4049	0.9376	0.5716	Gm6477
-0.4047	1.385	0.4391	Brf2
-0.4045	3.118	0.2504	Srrd
-0.4035	7.724	0.1978	Gspt1
-0.4034	5.223	0.05365	Tal1
-0.403	0.5231	0.545	Dach1
-0.4028	2.46	0.2172	Wdr83
-0.4027	5.311	0.181	Rpl22
-0.4026	3.823	0.3738	Cdc14b
-0.4026	1.369	0.4351	Rpp38
-0.4023	6.497	0.1509	Rpl3
-0.4023	2.4	0.402	6030443J06Rik
-0.4022	5.715	0.02094	Scd2
-0.4019	2.907	0.1698	Rfesd
-0.4014	1.587	0.4193	Bik
-0.4012	5.296	0.02734	Ppp1r13b
-0.4012	2.329	0.2973	Tmem256
-0.4012	1.216	0.4308	Il18bp
-0.4011	4.955	0.06173	Atp6v1g1
-0.4011	1.831	0.3578	Efemp2
-0.401	1.656	0.374	Galk1
-0.4008	2.324	0.3567	Tmc8
-0.4007	4.317	0.05405	Cdk4
-0.4004	3.512	0.2565	B430010I23Rik
-0.4002	2.629	0.3096	Ndufa3
-0.4001	2.73	0.2467	Runx1t1
-0.4001	1.986	0.3046	Bmp1
-0.4	2.558	0.4642	Sycp2
-0.3999	1.913	0.375	3110021N24Rik
-0.3997	0.5838	0.4598	Dock3
-0.3996	3.773	0.1322	Degs1
-0.3994	1.4	0.4061	5730405O15Rik
-0.3994	3.051	0.4642	Dgki
-0.399	6.325	0.01078	Ywhag
-0.3986	6.653	0.03699	Il17ra
-0.3985	5.243	0.02735	Emc3
-0.3985	2.905	0.2661	Dhrs11
-0.3984	1.634	0.3891	Tmem218
-0.3982	4.907	0.1375	Rpl24
-0.3981	4.095	0.1144	Cenpp
-0.398	3.351	0.1425	Ebp
-0.3975	3.075	0.2249	Itgae
-0.3971	3.058	0.1661	Plxna4os1
-0.3969	2.601	0.1969	Fkbp14
-0.3969	0.886	0.4926	Kbtbd12
-0.3967	1.981	0.441	Rtl6
-0.3965	3.459	0.1425	Nrm
-0.3964	5.06	0.08846	Pcyox1
-0.3961	2.848	0.2529	Ado
-0.396	2.299	0.2995	Gm41611
-0.3958	3.372	0.1096	Ubxn8
-0.3957	9.04	0.01202	Basp1
-0.3956	4.041	0.07645	Bpnt1
-0.3956	0.9273	0.4464	1810055G02Rik
-0.3955	2.19	0.3316	AW011738
-0.3952	6.491	0.3184	Nt5dc1
-0.3951	4.356	0.1758	Tpi1
-0.3949	2.112	0.2824	Lig4
-0.3947	5.307	0.07803	Gm46367
-0.3943	7.808	0.1932	Ly6e
-0.3943	1.013	0.5358	Atp1b2
-0.3941	3.259	0.1648	Hmga1
-0.3939	1.234	0.4815	Gm5577
-0.3938	2.474	0.2218	Gm28041
-0.3937	1.946	0.4163	Cmtr2
-0.3934	4.23	0.1254	Gm15850
-0.3934	0.6648	0.5051	Sac3d1
-0.3931	0.861	0.533	Tshz2
-0.393	3.079	0.2092	Pdgfa
-0.3926	4.744	0.1205	Mccc2
-0.3925	3.384	0.263	Capn2
-0.3925	1.079	0.5985	Kcnrg
-0.392	4.483	0.2531	Rpl10a
-0.392	2.432	0.2815	Mrpl41
-0.3918	2.675	0.5167	Wdhd1
-0.3917	1.045	0.4768	Alyref2
-0.3915	5.7	0.04582	Gnb2
-0.3911	5.649	0.02734	Micos10
-0.3911	7.991	0.4337	Hpgd
-0.391	4.421	0.1327	Slc35b2
-0.391	1.558	0.5779	Gm31410
-0.3905	0.6937	0.6406	Eola1
-0.3902	1.982	0.3183	Elof1
-0.3897	6.035	0.06215	Set
-0.3893	2.313	0.3063	Lrrc18
-0.3889	0.648	0.5358	Mfsd9
-0.3888	1.685	0.3874	Gm30054
-0.3886	1.561	0.3631	Slc6a8
-0.3886	2.167	0.7273	Armc6
-0.3884	4.062	0.08462	Ints2
-0.3884	3.52	0.1882	Fam89b
-0.3883	2.368	0.7179	A230056P14Rik
-0.3882	8.279	0.005606	Gnai2
-0.3882	2.225	0.4292	Prickle2
-0.3877	4.008	0.08454	Lamtor4
-0.3875	6.974	0.006232	Hcls1
-0.3875	2.065	0.352	Smyd1
-0.3873	2.131	0.3933	Zfp937
-0.387	0.7783	0.4804	Fermt2
-0.3868	3.631	0.09882	1110032A03Rik
-0.3864	3.155	0.2105	Taf10
-0.3863	5.5	0.0622	Stxbp4
-0.3862	2.436	0.2547	Dtwd1
-0.3859	6.588	0.03123	Sowahc
-0.3859	3.388	0.4356	Fasn
-0.3858	1.893	0.3527	4933439K11Rik
-0.3855	0.9931	0.591	B3galt4
-0.3854	3.497	0.1871	Ndufs8
-0.3854	2.688	0.222	Nlgn1
-0.3853	4.234	0.08473	Chmp2a
-0.3852	2.15	0.3022	Mrnip
-0.385	4.584	0.1032	Slc25a4
-0.385	4.593	0.3947	Gpr84
-0.3843	3.475	0.1999	Pithd1
-0.3843	0.9795	0.557	Sdhaf1
-0.3842	2.484	0.3121	Dusp10
-0.3839	3.771	0.115	Tm2d2
-0.3837	3.33	0.2166	Wscd1
-0.3834	3.286	0.2797	ENSMUSG00000121479
-0.3833	3.615	0.1482	Gnptg
-0.3833	2.653	0.2704	Nit2
-0.3831	2.346	0.2408	Prex2
-0.383	6.88	0.06028	Aif1
-0.383	3.522	0.3305	Brca2
-0.3826	4.361	0.07142	Snapin
-0.3826	4.703	0.1282	Eef1d
-0.3819	3.26	0.1262	Gm15283
-0.3818	2.151	0.4271	Pstpip1
-0.3817	6.494	0.02152	Tgoln1
-0.3817	0.8895	0.5478	Mcm8
-0.3816	0.8495	0.6492	2810428J06Rik
-0.3812	4.638	0.04598	Tspyl1
-0.3811	5.568	0.1021	Hyou1
-0.3809	5.482	0.03691	Pnrc1
-0.3806	6.314	0.04636	Ssr1
-0.3806	1.363	0.5605	Gm28529
-0.3804	3.083	0.1923	Mrpl14
-0.3803	7.257	0.02152	Sdcbp
-0.3801	0.6802	0.6565	Fignl1
-0.38	6.059	0.0382	Cops4
-0.3799	2.631	0.1872	Micos13
-0.3799	1.036	0.5519	Pyurf
-0.3797	2.586	0.2277	Psmd10
-0.3794	3.46	0.1751	Gm20186
-0.3791	2.74	0.1644	Dnpep
-0.3791	3.013	0.2	Comtd1
-0.3789	6.963	0.02266	Arhgap4
-0.3788	6.372	0.06314	Magt1
-0.3787	2.443	0.4044	Myl2
-0.3787	1.391	0.5374	Elp6
-0.3786	4.557	0.07133	Smim15
-0.3785	5.307	0.2	Cd14
-0.3784	4.877	0.06314	Med22
-0.3784	0.6454	0.6166	Hecw2
-0.3783	1.577	0.451	Naa38
-0.3779	2.779	0.2428	Coasy
-0.3776	4.105	0.08752	Gclm
-0.3775	1.506	0.3843	Zfp940
-0.3775	1.404	0.4544	Tspyl3
-0.3774	1.621	0.6445	Nxpe4
-0.3771	4.619	0.04677	Bend6
-0.377	1.029	0.509	Coa4
-0.3767	6.468	0.018	Ipo9
-0.3763	6.876	0.05811	Cd68
-0.3763	2.236	0.3383	Btbd6
-0.3762	2.424	0.4222	Zfp449
-0.3761	6.133	0.008503	Wdfy1
-0.3761	2.392	0.282	A330040F15Rik
-0.3761	2.552	0.3437	Spock2
-0.376	6.282	0.06772	Tdrd3
-0.376	2.426	0.3401	Ndufa5
-0.3759	4.975	0.108	Hsbp1
-0.3757	1.226	0.4527	Pelo
-0.3752	2.223	0.3834	Zfp759
-0.3749	6.037	0.1771	Pdia4
-0.3747	2.79	0.1637	Haus2
-0.3747	0.6988	0.5086	Sorbs2os
-0.3746	2.62	0.2022	Snu13
-0.3744	6.243	0.2529	A330023F24Rik
-0.3743	0.919	0.4841	Akap6
-0.3741	2.296	0.2531	Ndufb2
-0.3741	1.189	0.4915	Riiad1
-0.3739	8.264	0.02478	Cd53
-0.3739	5.65	0.194	Eif5a
-0.3733	5.651	0.1948	Slc25a5
-0.3732	0.8815	0.6019	E2f1
-0.3731	0.9066	0.4606	Siglecg
-0.373	3.086	0.1932	Psenen
-0.3728	4.079	0.06745	Sdad1
-0.3728	3.33	0.297	Alyref
-0.3723	3.662	0.2667	Rpl27
-0.3723	1.108	0.5543	AW112010
-0.3722	1.212	0.5986	Paqr4
-0.372	5.018	0.348	Atrnl1
-0.3719	1.327	0.4624	Lca5l
-0.3715	4.418	0.07315	Map7
-0.3712	1.97	0.3834	Thtpa
-0.3712	6.039	0.4901	Cd63
-0.371	1.585	0.4725	Sh3bp4
-0.3709	6.826	0.0389	Usp6nl
-0.3709	3.662	0.1751	Zfp687
-0.3709	0.9912	0.4354	Tmem203
-0.3708	2.677	0.2667	Tmem237
-0.3703	7.194	0.01785	Hmgb1
-0.3702	7.006	0.0622	Ptma
-0.3702	3.176	0.298	Hic2
-0.37	3.226	0.1807	Ano8
-0.3699	5.721	0.02152	Nsun2
-0.3698	2.091	0.4321	9130023H24Rik
-0.3697	2.754	0.3216	Dgke
-0.3694	4.569	0.4272	Kcnj12
-0.3692	5.808	0.083	Naca
-0.3691	1.303	0.4251	Kcnq3
-0.3687	4.278	0.1028	Rnf7
-0.3686	8.028	0.03328	Rasal2
-0.3681	0.5507	0.5859	4833445I07Rik
-0.368	0.574	0.474	C530005A16Rik
-0.3678	6.79	0.02869	Stau2
-0.3673	4.038	0.08825	Arpc5l
-0.3672	5.936	0.05878	Zfp706
-0.3672	3.811	0.1384	Prmt1
-0.3667	4.925	0.07307	Srgap3
-0.3667	1.729	0.419	Igsf10
-0.3665	7.746	0.0163	Ywhae
-0.3663	4.679	0.1085	Pdha1
-0.3661	4.29	0.08588	Psmb8
-0.366	3.543	0.1485	Hccs
-0.3656	2.942	0.2622	Clec2d
-0.3654	5.595	0.03154	Skp1
-0.3654	1.561	0.5241	Dnaaf2
-0.3653	4.039	0.1601	Gtf2b
-0.3652	0.7935	0.5023	Gstm4
-0.3651	0.7004	0.5217	Gm38134
-0.365	4.467	0.1937	Ranbp1
-0.3649	3.257	0.2113	Txn1
-0.3646	4.78	0.08354	Tle5
-0.3645	2.707	0.3387	Aph1a
-0.3644	5.208	0.2308	Rpl6
-0.3643	6.494	0.01979	Cpne3
-0.3642	6.674	0.01395	Morf4l1
-0.3642	2.357	0.2486	Gm20661
-0.3637	5.58	0.06496	Arpc3
-0.3636	2.693	0.2055	1110038F14Rik
-0.3635	6.948	0.04083	Ywhab
-0.3632	4.33	0.09127	Cops7a
-0.3631	0.7168	0.5706	Ttll7
-0.3628	3.509	0.1391	Bax
-0.3627	4.768	0.08096	Psma7
-0.3622	2.654	0.2318	Gm47827
-0.3618	4.305	0.1268	Gm20528
-0.3615	2.596	0.4082	Rgs14
-0.3613	2.314	0.3533	Rex1bd
-0.3611	1.76	0.4606	Prxl2a
-0.361	6.339	0.08091	Hdac4
-0.3609	5.556	0.05978	Nudt4
-0.3608	3.441	0.3536	Kcnj10
-0.3608	5.362	0.6428	Creb5
-0.3606	7.216	0.4661	Setbp1
-0.3601	3.52	0.1531	Sigmar1
-0.3597	0.5053	0.8364	4930471E19Rik
-0.3596	4.766	0.2613	Calm3
-0.3596	2.373	0.2746	Ttll12
-0.3595	6.528	0.02696	Smad7
-0.3593	6.656	0.03994	Gm35188
-0.3591	0.4136	0.7021	Cip2a
-0.359	2.375	0.3021	Pop4
-0.3588	1.515	0.4816	Cks2
-0.3586	3.267	0.2318	Cand2
-0.3584	5.694	0.6441	Amotl1
-0.3583	3.2	0.3477	1600022D10Rik
-0.358	3.01	0.2939	2810002D19Rik
-0.3579	1.916	0.4232	Gm10605
-0.3579	2.602	0.4284	Gm48099
-0.3578	4.347	0.1033	Psma4
-0.3573	3.958	0.2385	Zfp703
-0.3572	3.199	0.1983	Plekhg2
-0.3572	2.883	0.3459	Cyren
-0.3571	4.445	0.3348	Cxcl16
-0.357	0.992	0.567	Gm17080
-0.3568	4.868	0.1285	Cln5
-0.3565	5.514	0.05194	Ctbp1
-0.3561	2.31	0.3448	Borcs6
-0.3559	1.757	0.4374	Zfp446
-0.3554	6.245	0.2789	Nlrp3
-0.3553	4.044	0.1568	Gtf2f1
-0.3552	2.647	0.2362	Eid2b
-0.3549	1.345	0.4528	Ifrd2
-0.3545	4.011	0.08354	Cnp
-0.3545	2.664	0.2373	Mfsd10
-0.3545	2.652	0.3297	Cpe
-0.3544	2.647	0.3683	9430038I01Rik
-0.3544	0.4289	0.6131	ENSMUSG00000120997
-0.3539	7.291	0.01512	Atp6v0a2
-0.3539	8.006	0.01492	Tnfrsf11a
-0.3539	1.257	0.4027	Pard3
-0.3539	1.149	0.6524	Schip1
-0.3535	4.378	0.1492	Slc7a5
-0.3534	6.132	0.05194	Arpc4
-0.3529	5.015	0.07147	Zfp40
-0.3529	0.8158	0.5592	Gm8093
-0.3528	3.153	0.1983	Ebpl
-0.3521	1.506	0.6917	Gm32098
-0.3519	6.346	0.02988	Reep5
-0.3516	2.837	0.3658	Nlrx1
-0.3512	4.762	0.08588	Adprh
-0.3512	2.951	0.2379	Wdr6
-0.3511	7.412	0.04811	Npc1
-0.3505	4.704	0.05502	Naa12
-0.3505	5.754	0.05537	Limd2
-0.3505	2.562	0.3887	Sash1
-0.3502	2.573	0.3084	Mrpl20
-0.3498	1.366	0.4772	Ptgds
-0.3496	7.311	0.09343	Ppt1
-0.3496	1.938	0.3969	Thnsl1
-0.3493	4.094	0.1268	Rnf128
-0.3491	2.521	0.358	Gm15655
-0.349	4.15	0.2147	Drap1
-0.3489	5.889	0.0953	Syngr2
-0.3488	6.664	0.2369	Sorl1
-0.3487	3.457	0.2522	Abracl
-0.3486	6.262	0.1877	H3f3b
-0.3485	9.397	0.01959	Cyfip1
-0.3479	7.47	0.1259	Tln2
-0.3476	4.394	0.06311	Gm41764
-0.3475	7.311	0.03657	Txnip
-0.3474	6.711	0.04306	Lysmd4
-0.3472	10.32	0.2846	Ubash3b
-0.3472	2.302	0.3704	Cibar1
-0.3471	3.466	0.1403	Rpf2
-0.3471	2.613	0.218	Ankrd42
-0.3471	0.7585	0.6178	Stac3
-0.347	4.76	0.5636	St8sia4
-0.3469	4.284	0.09731	Pabpc4
-0.3467	5.987	0.1607	Rpn1
-0.3466	4.996	0.1297	Nsun6
-0.3462	3.073	0.3201	Eef1e1
-0.346	4.136	0.1264	Lmo4
-0.346	0.9952	0.5176	Dclk1
-0.3458	5.635	0.04285	Cnpy3
-0.3453	7.991	0.01444	Arpc2
-0.3449	8.443	0.03604	Snx13
-0.3449	4.363	0.1733	Unc5c
-0.3447	1.31	0.5287	Dxo
-0.3446	5.69	0.04915	Lpar6
-0.3445	7.789	0.06808	Ddx3x
-0.3444	1.927	0.3848	Ptger1
-0.3444	1.765	0.4008	Lsm10
-0.344	2.856	0.2064	Zc3h10
-0.3436	5.535	0.03626	Lclat1
-0.3435	3.768	0.1163	Gm20544
-0.3434	3.152	0.1595	Ikbip
-0.3433	2.932	0.349	Ralgds
-0.3431	3.951	0.127	Rps6ka4
-0.3431	1.007	0.4937	Agbl4
-0.343	5.841	0.03687	Trp53bp2
-0.3427	3.092	0.1664	Ccdc43
-0.3426	3.545	0.1549	Vma21
-0.3423	4.883	0.1021	Clcn6
-0.3423	4.024	0.1643	Srd5a3
-0.3423	4.701	0.2192	Srl
-0.3422	5.092	0.06463	Syap1
-0.3419	3.885	0.2031	Cops6
-0.3419	2.213	0.4179	Pfdn4
-0.3416	8.062	0.0412	Ubl3
-0.3414	2.177	0.363	Tkfc
-0.3412	0.7519	0.6593	Gm16299
-0.3411	4.198	0.1223	Ticam2
-0.3411	3.093	0.2422	Gdpd5
-0.341	5.077	0.2306	Kxd1
-0.3407	1.595	0.5126	Nat2
-0.3406	5.885	0.04867	Tmem86a
-0.3399	6.306	0.04649	Mapre1
-0.3399	7.34	0.009388	Reep3
-0.3397	2.87	0.3188	Gins1
-0.3396	1.939	0.4462	Uqcc3
-0.3394	1.452	0.6423	AB124611
-0.3392	3.553	0.1954	Thumpd1
-0.3392	0.5573	0.6839	Tmem17
-0.339	1.405	0.4873	Ndufaf3
-0.3387	3.392	0.2517	Yif1b
-0.338	4.485	0.08354	Alg11
-0.338	3.382	0.2162	1600012H06Rik
-0.3379	5.4	0.1056	Txlna
-0.3379	3.524	0.3857	Zfp719
-0.3378	2.377	0.3602	Acy1
-0.3376	5.075	0.1532	Ctnnal1
-0.3376	1.875	0.4679	Cd1d1
-0.3375	0.5088	0.6531	Mgat4c
-0.3372	5.277	0.09835	Ppm1g
-0.3372	3.121	0.2063	Det1
-0.3372	1.015	0.474	9230112E08Rik
-0.3371	0.6454	0.6086	Gm17088
-0.337	3.558	0.2983	Idh3a
-0.3367	9.967	0.05557	Itm2b
-0.3367	4.066	0.3196	Blm
-0.3366	6.327	0.373	Rps9
-0.3365	6.325	0.0406	Tmx4
-0.3364	4.16	0.1583	Rbm8a
-0.3364	4.089	0.2258	Rfc2
-0.3358	4.778	0.1576	Tgif1
-0.3358	3.515	0.2676	Akr1b3
-0.3356	10.18	0.03358	Numb
-0.3356	6.57	0.1103	Lrp12
-0.3354	7.623	0.1031	Pfkfb3
-0.3353	2.132	0.7134	Shtn1
-0.3351	1.563	0.4717	Med18
-0.335	5.805	0.1123	Ptbp1
-0.3349	5.142	0.07299	Cd302
-0.3348	4.373	0.1108	Galnt4
-0.3347	6.372	0.02179	Sall3
-0.3345	0.965	0.5716	Fdxacb1
-0.3344	4.167	0.1424	Golm2
-0.3343	6.258	0.07133	Zcchc24
-0.3342	0.8628	0.6084	Gm16278
-0.3336	1.011	0.4884	Plpp2
-0.3335	3.795	0.1698	Cnpy2
-0.3334	0.6527	0.4969	Nrg1 - ENSMUSG00000062991
-0.333	5.14	0.05962	Tm7sf3
-0.3329	8.574	0.01268	Lcp1
-0.3329	2.857	0.3419	Ndufa2
-0.3327	2.405	0.3676	Ccdc152
-0.3326	7.705	0.03598	Rhoh
-0.3326	1.505	0.5222	ENSMUSG00000120012
-0.3324	2.057	0.4646	Elovl6
-0.3323	3.531	0.2157	Eif4e3
-0.3321	8.777	0.1317	Glul
-0.332	5.112	0.07743	Fam20b
-0.332	2.895	0.3892	Nop16
-0.3316	4.473	0.2721	Arhgap9
-0.3312	1.245	0.4356	Cd79b
-0.331	5.547	0.141	Tagap
-0.3305	1.326	0.5415	Leng9
-0.3303	9.033	0.1094	Jarid2
-0.3303	1.19	0.6778	Gm4617
-0.3302	2.487	0.5017	Gm3667
-0.3301	3.171	0.3033	Haus7
-0.33	4.128	0.1108	Mmgt2
-0.3298	8.87	0.04677	Myh9
-0.3297	2.644	0.2444	Atg101
-0.3297	3.95	0.271	Elovl1
-0.3296	8.886	0.5301	Olfml3
-0.3295	4.484	0.157	Ceacam1
-0.3294	9.095	0.02621	Fam102b
-0.3293	9.17	0.07634	Retreg1
-0.3293	4.632	0.1932	Glmp
-0.3293	3.137	0.5345	St8sia1
-0.3292	8.811	0.05742	Cdh23
-0.329	4.492	0.1994	Eif4a3
-0.329	3.454	0.2489	Eif3i
-0.3289	2.607	0.4388	Zfp341
-0.3288	3.157	0.232	Txndc17
-0.3287	4.846	0.1592	Slc39a7
-0.3287	1.669	0.5937	Clhc1
-0.3285	3.321	0.5439	Tmem154
-0.3283	1.907	0.4308	Spsb2
-0.328	5.426	0.07569	9530068E07Rik
-0.3279	6.177	0.03299	Stt3b
-0.3279	2.659	0.425	Gm21974
-0.3278	4.351	0.1599	Cetn3
-0.3277	8.397	0.06215	Anxa3
-0.3277	1.256	0.6779	Il20rb
-0.3273	0.9976	0.527	Cdh2
-0.3271	2.212	0.3834	Fancd2
-0.327	5.343	0.3804	Rps12
-0.3269	4.242	0.231	Tpm4
-0.3266	4.709	0.1909	Pigt
-0.3266	2.612	0.3288	Gm26760
-0.3264	4.868	0.1585	Hnrnpa0
-0.3264	4.922	0.1734	Selenok
-0.3262	0.9954	0.6651	1700025N23Rik
-0.326	7.556	0.01777	Pla2g15
-0.3259	3.502	0.2481	Armt1
-0.3258	0.6322	0.6518	Mettl18
-0.3257	1.105	0.5543	Gm2956
-0.3254	2.297	0.3153	Ino80b
-0.3253	5.485	0.05298	Nras
-0.3253	4.386	0.1833	Nop53
-0.3253	3.567	0.2975	Psmb4
-0.3252	4.035	0.1805	Ramp2
-0.3246	6.465	0.1928	Nr6a1os
-0.3245	2.935	0.3176	Zfas1
-0.3243	3.453	0.2495	Armc10
-0.324	6.201	0.1725	Spcs3
-0.3239	0.4938	0.6366	AI429214
-0.3238	6.439	0.3154	Rpl13a
-0.3234	4.714	0.1727	Mpv17l
-0.3234	3.274	0.2808	Ndufb7
-0.3231	6.934	0.04598	Arpc1b
-0.323	6.709	0.1261	Eif4a1
-0.3227	5.034	0.1306	Mknk2
-0.3227	1.974	0.5478	Grtp1
-0.3226	4.856	0.1111	Stk38l
-0.3226	0.6076	0.582	2010001A14Rik
-0.3225	3.96	0.1542	Hexim1
-0.322	3.007	0.2487	Chrac1
-0.322	0.9268	0.635	9530034E10Rik
-0.3217	3.987	0.175	Prkd2
-0.3216	6.586	0.02734	Arhgdib
-0.3216	6.032	0.09999	G3bp1
-0.3213	2.875	0.5253	Rbms3
-0.3211	1.452	0.6025	Icos
-0.321	1.26	0.4735	Gm42878
-0.321	1.659	0.5688	2310047D07Rik
-0.3206	8.916	0.1974	Cd81
-0.3205	5.069	0.07056	Vdac1
-0.3205	4.986	0.1107	Mmd
-0.3205	0.7982	0.5743	Mblac1
-0.3202	4.221	0.1764	Enoph1
-0.3201	4.845	0.06364	Spg7
-0.3201	1.862	0.4504	Gm42906
-0.32	6.117	0.06249	Saraf
-0.3197	7.714	0.3511	Eef2
-0.3196	4.544	0.1563	Fam174a
-0.3194	2.566	0.3921	Trmo
-0.3193	2.243	0.5178	Ndufa1
-0.3191	6.48	0.04529	Sil1
-0.3186	3.042	0.283	Tipin
-0.3185	2.325	0.3154	Epas1
-0.3179	7.244	0.07228	Arhgef40
-0.3179	2.431	0.4813	Isoc2b
-0.3176	2.519	0.4149	Mrpl30
-0.3175	2.958	0.2641	Map1lc3a
-0.3174	0.8421	0.6108	Wwc1
-0.3172	3.051	0.2617	Gm49380
-0.3171	4.008	0.2164	Psmc4
-0.3171	4.845	0.3708	Psme1
-0.3171	1.658	0.578	Pde7b
-0.317	1.984	0.4573	4930595D18Rik
-0.3168	0.9844	0.5351	Mboat2
-0.3166	1.76	0.5896	Tmem41a
-0.3164	5.038	0.1284	Taldo1
-0.3164	2.406	0.3011	AI837181
-0.3164	1.022	0.6293	Syt3
-0.3163	3.758	0.1921	Mzt2
-0.3163	0.8468	0.599	Gm37571
-0.3163	2.384	0.7645	Jazf1
-0.3161	6.285	0.03691	Adam15
-0.3161	3.45	0.234	Fosl2
-0.3157	1.587	0.5414	Snhg14
-0.3156	6.223	0.2063	Atp5b
-0.3156	3.636	0.2576	Med28
-0.3156	1.976	0.3856	ENSMUSG00000121178
-0.3156	1.553	0.4942	Nxn
-0.3152	5.896	0.07575	St7
-0.315	3.682	0.1648	Cinp
-0.3149	5.406	0.09657	Bag1
-0.3148	5.29	0.119	Tmco1
-0.3147	6.709	0.02041	Arf1
[truncated: 55,011 more rows]

## Sheet: DE-InfM
logFC	AveExpr	p_val_adj	gene_names
-5.244	2.023	4.788e-06	Cd36
-4.843	2.207	0.0215	4930519F16Rik
-4.512	1.695	0.0001311	Actr3-ps
-4.167	1.591	0.0001311	Gm29536
-4.131	5.14	0.07899	Cd300lf
-4.09	4.468	0.04398	Gm47283
-3.706	5.797	6.289e-08	Nme7
-3.652	1.934	0.1903	Pianp
-3.573	6.516	0.003116	Nrxn1
-3.571	2.786	0.04595	Rab37
-2.66	2.97	0.3677	Gpr165
-2.622	2.815	0.2036	Gm49692
-2.387	4.479	0.5882	Slc15a2
-2.314	9.923	1.552e-10	Arsb
-2.29	5.693	0.1716	Colec12
-2.134	3.108	0.1914	Lmna
-2.069	4.505	0.701	Gm26992
-2.038	3.601	0.08651	Cacng8
-1.964	5.17	0.0008214	Sfmbt2
-1.946	5.378	0.003928	Qsox1
-1.917	2.965	0.1472	Ptger3
-1.899	7.677	0.3538	Cacna1a
-1.898	2.295	0.005549	Gm55594
-1.89	2.594	0.01315	Dusp18
-1.851	3.775	0.4693	Angptl7
-1.842	6.91	0.2818	Nhs
-1.821	5.694	0.846	Xist
-1.82	3.924	0.002715	Spry1
-1.806	2.834	0.08009	Fam167b
-1.756	3.649	0.008995	Zfyve21
-1.711	4.308	0.2502	Adamts1
-1.707	3.562	0.006752	Glrx
-1.695	3.729	0.0528	Mcc
-1.687	3.351	0.01888	Gm29282
-1.681	2.895	0.07841	Gm47819
-1.646	3.053	0.01785	Gm30198
-1.635	2.978	0.00977	Cnn2
-1.601	5.718	0.01063	Alox5
-1.591	2.975	0.01292	9330185C12Rik
-1.562	4.739	0.5041	Magi2
-1.537	3.394	0.01911	Unc5cl
-1.504	3.116	0.02444	Chic1
-1.478	3.324	0.7644	Zfp268
-1.447	2.938	0.663	Syt6
-1.408	3.501	0.02263	Spock1
-1.405	4.808	0.001799	Cd52
-1.397	3.031	0.07554	Rilpl2
-1.377	2.484	0.06273	Kdr
-1.375	5.061	0.22	Gm27008
-1.375	4.559	0.4381	Gnb4
-1.36	7.808	1.005e-05	Xpr1
-1.359	3.923	0.03447	Gm47469
-1.358	2.167	0.1508	Ccl2
-1.34	5.093	0.0009853	Tagln2
-1.339	2.624	0.02559	Prkcz
-1.324	3.107	0.3154	Tamalin
-1.31	3.292	0.03386	Erc1
-1.306	3.221	0.04006	Pdzrn4
-1.287	4.039	0.01654	Enoph1
-1.281	4.487	0.5958	Gm11867
-1.266	3.313	0.04628	Ndufa4
-1.263	2.6	0.1026	Nme1
-1.252	3.776	0.02719	Jam3
-1.25	5.194	0.02443	Gm10138
-1.248	2.922	0.0461	Ccr2
-1.246	3.324	0.7836	Ccdc80
-1.23	6.122	0.08167	Ube2e2
-1.223	3.849	0.05101	Gm20721
-1.222	3.758	0.0883	Trib1
-1.211	2.692	0.03469	Gm44511
-1.196	5.119	0.03013	Ccrl2
-1.196	3.288	0.1712	D630045J12Rik
-1.188	5.917	0.04442	Klf2
-1.182	2.113	0.8209	Tsix
-1.177	5.416	0.004567	Zfp729a
-1.175	2.666	0.0826	Uqcc2
-1.174	2.596	0.05315	Mfge8
-1.174	7.629	0.5403	Rn7sk
-1.168	6.19	0.0009587	Ubc
-1.167	2.848	0.1315	Mymk
-1.161	3.737	0.04351	Ildr1
-1.154	2.881	0.09755	Lmf2
-1.153	3.163	0.05121	Slc25a39
-1.152	12.78	0.01063	Lars2
-1.15	2.962	0.05619	Elob
-1.148	2.655	0.1096	Sec61b
-1.148	2.559	0.3089	Tmem258
-1.144	6.193	0.0005817	Tom1l1
-1.124	5.686	0.002812	Cmtm8
-1.122	3.414	0.07566	Txnl4a
-1.121	3.953	0.09005	Igfbp4
-1.117	2.984	0.1019	1600022D10Rik
-1.11	6.182	0.0009587	Gm49342
-1.109	9.033	0.01056	Gm15564
-1.105	6.997	0.2434	Fos
-1.1	2.056	0.569	Gm31410
-1.099	2.988	0.2611	Tmem60
-1.097	3.915	0.08426	ENSMUSG00000120869
-1.094	3.529	0.119	ENSMUSG00000120357
-1.093	3.657	0.04922	Mmgt2
-1.093	4.923	0.8348	Msh5
-1.091	2.753	0.05994	Nenf
-1.089	3.236	0.07435	Hspa1b
-1.084	4.167	0.06461	Ccdc62
-1.08	3.738	0.2026	Notch4
-1.073	3.468	0.04578	Spag7
-1.069	4.526	0.05217	Gimap6
-1.068	4.958	0.04914	Irf2bpl
-1.063	3.107	0.06805	B430010I23Rik
-1.061	3.91	0.2263	Ier3
-1.06	3.236	0.0375	Hint1
-1.058	3.718	0.3666	Cry1
-1.046	5.581	0.005981	Igsf8
-1.043	3.838	0.03281	BC031181
-1.043	3.549	0.1367	Map3k19
-1.037	2.499	0.1251	Smpdl3b
-1.034	4.494	0.08968	2010013B24Rik
-1.03	4.004	0.1225	Arhgef3
-1.028	3.414	0.1446	Gm33370
-1.026	3.047	0.1867	Ighd
-1.021	2.808	0.1093	Ap5b1
-1.017	2.651	0.1519	Gm30411
-1.014	4.516	0.05103	Id2
-1.012	3.308	0.08306	AI504432
-1.008	2.897	0.1431	Gm5420
-1.005	6.518	0.0004853	Actg1
-1.002	2.903	0.5273	Dpy30
-0.9973	6.847	0.01785	Rgs1
-0.9945	2.584	0.1082	Gm7964
-0.9722	3.871	0.08426	Pvr
-0.9701	6.718	0.5623	Gm12865
-0.9693	3.283	0.1323	Gm41804
-0.9647	3.319	0.5462	Gm12861
-0.9631	2.854	0.2262	Usb1
-0.9557	2.624	0.2521	Ubiad1
-0.9501	4.171	0.06968	Masp1
-0.95	2.753	0.4288	Mrpl41
-0.9482	4.684	0.1783	Gm37168
-0.9469	4.215	0.4385	Cd244a
-0.9441	3.522	0.07422	Gm31243
-0.9433	2.835	0.236	Efnb2
-0.9414	3.408	0.5246	ENSMUSG00000120673
-0.9393	3.503	0.1991	Ctla2b
-0.9374	7.057	0.1314	Dusp6
-0.9371	5.426	0.06596	1700025G04Rik
-0.9287	3.787	0.25	Cebpd
-0.9282	4.488	0.02245	Rasgrp4
-0.9278	6.41	0.3665	Dusp1
-0.9273	4.493	0.03622	Rpl18
-0.9273	3.988	0.2521	Klf4
-0.9245	7.288	0.07554	Slc2a5
-0.9239	5.442	0.05497	Furin
-0.9224	4.632	0.02982	Marcksl1
-0.9182	5.712	0.2965	Cass4
-0.9176	2.786	0.21	Tubb6
-0.9156	5.398	0.05859	Sox4
-0.9132	6.315	0.02258	Cd34
-0.9121	4.355	0.1445	ENSMUSG00000120030
-0.912	11.58	0.0009853	Cst3
-0.9106	3.311	0.3142	Bcl2a1d
-0.9087	4.463	0.03605	Acvrl1
-0.9053	3.866	0.05814	Saysd1
-0.9046	9.678	3.345e-05	Tmsb4x
-0.8964	3.773	0.4799	Btg3
-0.8958	3.038	0.22	Etl4
-0.8902	4.28	0.06121	Tmem100
-0.8858	5.888	0.008176	Tgm2
-0.8849	5.114	0.01071	Bzw2
-0.8783	5.695	0.006324	Gpx1
-0.8766	4.679	0.06141	Tex14
-0.8763	5.132	0.03605	Nod1
-0.8762	3.42	0.08198	Pigs
-0.8685	3.933	0.05976	Gsdme
-0.8683	2.627	0.4437	Lamtor2
-0.8673	3.999	0.05398	Adh5
-0.8662	3.161	0.1292	Plppr4
-0.8661	3.569	0.118	Oaf
-0.8657	4.582	0.02508	Cdk5rap1
-0.8629	4.401	0.05266	Gm42962
-0.8587	6.035	0.005538	Nudt4
-0.8543	5.356	0.1164	Sgip1
-0.8538	3.78	0.1116	Usp1
-0.8534	2.864	0.1488	Tomm40l
-0.8533	4.122	0.1485	Rpl36a
-0.8523	5.192	0.04776	Epha2
-0.8499	4.615	0.03891	Denr
-0.8496	3.904	0.06668	Selenon
-0.8471	4.936	0.01523	Hmgn1
-0.8468	3.475	0.1844	Serpinf1
-0.8467	9.246	0.1883	Il31ra
-0.8455	3.316	0.1648	Cd2bp2
-0.8437	4.434	0.09541	Gm15441
-0.842	3.974	0.1951	Bcl2a1a
-0.8415	5.178	0.0182	Nudc
-0.8413	4.518	0.1499	Nectin2
-0.8405	4.661	0.03891	Cdk5r1
-0.8338	2.995	0.1772	Pigh
-0.833	3.497	0.5667	Gm15880
-0.8329	3.268	0.1696	Ino80c
-0.8296	2.482	0.5893	Maff
-0.8291	4.681	0.43	Il7r
-0.8266	3.193	0.1851	Atp5md
-0.8213	3.9	0.04595	Hmgcs1
-0.8209	4.545	0.03416	Sptssa
-0.8202	11.34	0.1832	Gphn
-0.8201	3.282	0.2706	Tob1
-0.8199	5.39	0.08518	Socs3
-0.8182	3.432	0.1004	Higd2a
-0.8158	8.477	0.001866	Ssbp2
-0.8138	5.426	0.2871	Map3k20
-0.8124	4.714	0.04797	Hmga2-ps1
-0.8122	3.474	0.1423	Mrpl17
-0.8116	4.01	0.07965	Tmem167b
-0.8113	2.509	0.4974	Dgki
-0.8111	3.131	0.2311	Ermap
-0.8092	3.409	0.08292	St6galnac6
-0.8049	2.495	0.2855	Wbp1
-0.8009	2.401	0.4187	Adgb
-0.8002	5.938	0.3061	Bcl6
-0.7995	6.136	0.01223	Ier5
-0.796	3.764	0.6296	Fgl2
-0.7942	5.489	0.02319	Jup
-0.7933	2.908	0.1422	Zfp202
-0.7917	4.25	0.04607	Tmsb10
-0.7905	4.412	0.03206	P2ry10b
-0.7901	7.54	0.01519	Sgk1
-0.7873	3.977	0.1488	Get3
-0.7866	3.822	0.6318	Kcnj12
-0.7823	4.269	0.464	Tnf
-0.7821	2.725	0.2331	Tmem141
-0.781	3.594	0.1028	Cox6b1
-0.7803	6.779	0.0101	Etv5
-0.7793	3.224	0.1692	Ndufs8
-0.777	4.749	0.05076	Gm12610
-0.7757	5.381	0.02444	Ets2
-0.7753	5.482	0.0809	Rps5
-0.7753	8.228	0.2263	Jun
-0.7737	3.787	0.09329	Batf3
-0.7724	3.065	0.2257	Prdx6
-0.7709	3.617	0.12	Rinl
-0.7709	7.025	0.1551	Tmx4
-0.7656	5.241	0.0243	Prps2
-0.7634	8.004	0.001128	Tnfrsf21
-0.761	6.828	0.003804	Tspan13
-0.7569	3.199	0.1696	Txn1
-0.7549	3.549	0.1955	5730455P16Rik
-0.7548	5.332	0.03162	Pcna
-0.7547	5.763	0.03857	Errfi1
-0.7545	4.615	0.09547	Arhgap27os3
-0.7525	4.733	0.4143	Prkcq
-0.752	8.242	0.07891	Bank1
-0.7516	6.106	0.07255	Sfi1
-0.7479	6.98	0.1181	Klf6
-0.7477	16.73	0.00295	Rn18s-rs5
-0.7466	3.31	0.211	Zkscan2
-0.7457	3.14	0.1576	E2f5
-0.7456	2.706	0.3084	ENSMUSG00000121177
-0.7455	5.874	0.03416	Rap1gap2
-0.7453	3.266	0.1492	Slc10a3
-0.7431	3.943	0.1884	Bscl2
-0.7425	4.038	0.05959	Slamf8
-0.7419	2.535	0.2673	Plpp5
-0.7409	3.808	0.1903	Phyh
-0.74	2.656	0.3637	Gm26862
-0.7399	2.694	0.1828	Trappc2l
-0.7395	7.786	0.01672	Gpr183
-0.7386	4.322	0.1138	Ankmy2
-0.7375	3.401	0.1969	2310022B05Rik
-0.7374	4.48	0.1507	Rps21
-0.7357	5.885	0.06121	Cited2
-0.7318	3.433	0.7516	Ccdc162
-0.7314	4.866	0.02231	Pdha1
-0.7306	5.164	0.02155	Lfng
-0.7291	7.699	0.005664	Med12l
-0.7282	3.732	0.2068	Nme2
-0.726	2.635	0.3877	B430306N03Rik
-0.7258	3.702	0.118	Tmx2
-0.7254	4.939	0.04307	Mmp2
-0.7251	2.57	0.2544	Mettl17
-0.7244	4.142	0.045	Map7
-0.7243	4.012	0.085	D8Ertd738e
-0.7242	6.453	0.01197	Bcl2
-0.7238	4.406	0.05976	Myo1d
-0.7235	14.45	0.05775	Cmss1
-0.7223	3.803	0.1497	Srp9
-0.7211	3.562	0.4045	Gm14023
-0.7203	4.263	0.261	Gm20186
-0.7196	4.489	0.03354	Zfp513
-0.7186	2.797	0.2544	Akap5
-0.7178	6.749	0.06549	Ppp1r10
-0.717	3.686	0.1655	Snrnp35
-0.7158	7.42	0.0128	Arhgap15
-0.7152	4.169	0.1555	Ran
-0.7145	9.129	0.1337	Mir6236
-0.7135	3.891	0.1372	Pole4
-0.713	3.803	0.6768	Nedd9
-0.7124	3.953	0.123	Rpl39
-0.7117	4.906	0.05976	Pdia5
-0.7106	2.569	0.3283	6330403L08Rik
-0.7102	2.648	0.2496	0610009L18Rik
-0.71	3.139	0.2903	Tmcc3os
-0.7099	5.256	0.06752	Midn
-0.7098	4.357	0.1557	Ranbp1
-0.7093	6.831	0.1616	Ctnnd2
-0.7088	3.44	0.323	Trp53inp2
-0.7081	2.983	0.2203	Gm41361
-0.7077	2.109	0.6503	ENSMUSG00000120134
-0.7071	4.278	0.08833	Pfdn5
-0.7068	3.019	0.2613	Fam149a
-0.7066	4.343	0.09698	Idh1
-0.7052	7	0.01563	Hsp90aa1
-0.7045	3.165	0.1914	Ebp
-0.7029	3.169	0.2068	Plekhg2
-0.7005	5.506	0.02802	Prkab1
-0.7005	3.764	0.1365	Grcc10
-0.6998	11.12	0.0001447	Actb
-0.697	3.992	0.1945	Gm44686
-0.6964	4.476	0.1285	Rps16
-0.6961	7.51	0.003116	Fcgr2b
-0.6949	2.736	0.2068	Pdlim2
-0.6944	6.804	0.4885	Fosb
-0.6942	6.715	0.001931	Commd8
-0.6929	2.973	0.1783	Cactin
-0.6921	3.482	0.1342	Hspa1a
-0.689	4.412	0.3806	Gm8091
-0.6889	5.582	0.06326	Rabgef1
-0.6878	6.083	0.00748	Ccnd1
-0.6867	7.182	0.001721	Pea15a
-0.686	4.352	0.09374	Otub1
-0.6855	4.171	0.1123	Sdf2l1
-0.6843	4.609	0.1608	Myc
-0.683	3.985	0.3194	Arhgap29
-0.6825	3.551	0.1804	Fam89b
-0.6825	4.627	0.2505	A630089N07Rik
-0.6818	3.554	0.1663	Gm37876
-0.6815	5.147	0.1722	Rpl19
-0.681	3.391	0.1548	Srf
-0.6808	4.535	0.34	H1f4
-0.6805	7.873	0.03013	Ftl1
-0.6795	3.44	0.2124	Alyref
-0.6788	4.701	0.1722	Tlcd2
-0.6787	2.895	0.1772	Cyb561d1
-0.6786	4.268	0.09698	Slc66a1
-0.6783	2.965	0.33	Anapc13
-0.6774	2.632	0.3016	Adprs
-0.6774	3.214	0.395	Plekha4
-0.6773	4.224	0.381	Klhdc8b
-0.677	3.677	0.1408	Psmb6
-0.6765	4.79	0.07301	Ssrp1
-0.6761	4.119	0.1858	Aldh2
-0.6753	4.043	0.2263	Hmgn2
-0.6749	3.053	0.4639	Cox7a2
-0.674	4.806	0.04749	Ppp1r7
-0.6733	3.421	0.4768	ENSMUSG00000120546
-0.6721	3.567	0.2487	Akr1b3
-0.6719	2.949	0.2415	Gm20089
-0.6715	7.244	0.00748	Calm1
-0.6691	4.577	0.09436	Ostc
-0.6687	3.332	0.3039	Gm4924
-0.6667	3.22	0.2716	Per2
-0.6657	5.08	0.05742	Plau
-0.663	3.144	0.3016	ENSMUSG00000120261
-0.6627	6.329	0.3216	Rps4x
-0.6626	6.172	0.01563	Rybp
-0.6621	5.694	0.02885	Fhad1
-0.6615	3.505	0.1844	2810025M15Rik
-0.6614	3.272	0.2667	Lipc
-0.6609	6.247	0.05442	Rpl21
-0.66	2.957	0.4404	Zfp367
-0.6573	3.788	0.1369	Peg10
-0.6556	3.038	0.3045	Zfp458
-0.6549	8.855	0.0004277	Ccr5
-0.6549	7.345	0.004111	Cfl1
-0.6545	3.928	0.1324	Zbed3
-0.6544	4.368	0.09547	Sem1
-0.654	5.466	0.04367	Arl5b
-0.6533	9.247	0.01599	Filip1l
-0.6531	4.194	0.1028	Edf1
-0.653	5.934	0.006661	Limd2
-0.6519	4.475	0.09837	Rnf24
-0.651	3.846	0.2651	Cd74
-0.6508	2.92	0.3681	Rfesd
-0.6507	3.837	0.2259	Patl2
-0.6504	6.541	0.04	Gcnt2
-0.6495	4.546	0.07073	Paics
-0.6495	3.167	0.2823	Nat9
-0.6494	9.036	0.005981	Rnase4
-0.6483	4.706	0.1451	Rps25
-0.6474	3.7	0.2177	Gpr35
-0.6469	7.244	0.1318	Ipcef1
-0.6468	6.962	0.008282	Aif1
-0.6452	6.023	0.02997	Ubb
-0.6449	5.752	0.2688	Lypd6
-0.6444	2.942	0.2884	Mcm6
-0.6437	9.892	0.1502	C1qa
-0.6432	2.983	0.3211	2310011J03Rik
-0.6431	4.011	0.1224	Utp18
-0.6429	6.25	0.0809	Fads1
-0.6427	4.271	0.29	Ctdspl
-0.6426	3.983	0.1478	Ppp2cb
-0.642	5.965	0.01785	Slc25a5
-0.642	3.035	0.36	Abitram
-0.6408	5.866	0.2075	Ppp1r15a
-0.6406	4.076	0.1256	Tprgl
-0.6396	9.61	0.004567	Tmem119
-0.6394	7.776	0.001128	Rhoa
-0.6394	6.919	0.02825	Naalad2
-0.639	3.03	0.3527	Ly6m
-0.6389	2.729	0.4372	Ptpmt1
-0.6387	2.934	0.3215	Cetn2
-0.6374	3.645	0.2076	Slc25a23
-0.6373	3.284	0.2259	Agbl5
-0.6369	5.758	0.03059	Gnb2
-0.6364	5.111	0.04435	Zfp131
-0.6351	3.475	0.1727	Nfyb
-0.6346	6.096	0.02982	Etv1
-0.6346	2.967	0.2671	Map1lc3a
-0.6343	4.366	0.1084	Pilra
-0.6342	4.959	0.04381	Nxt2
-0.6306	3.266	0.2672	Camkk1
-0.6304	2.703	0.413	Phldb1
-0.6299	3.824	0.2169	Zfand2a
-0.6297	4.759	0.1727	Naaa
-0.6295	6.187	0.00722	Adam15
-0.6291	6.123	0.1641	Flna
-0.6281	7.222	0.005981	Ndfip1
-0.6277	5.769	0.03386	Lman1
-0.6262	3.416	0.188	Tubb4b
-0.6257	3.169	0.2712	Psenen
-0.6246	4.677	0.1548	Rpl35a
-0.6239	3.81	0.2286	Gm4221
-0.6232	3.008	0.3327	Mcm4
-0.6217	5.833	0.1017	Rpn1
-0.6197	5.768	0.3958	Nfkbid
-0.6192	5.436	0.07872	Rpl8
-0.6187	2.87	0.3086	Gla
-0.6183	8.183	0.03386	Hspa8
-0.6177	5.191	0.03225	Hnrnph2
-0.6174	8.007	0.002895	Atg10
-0.6172	5.23	0.1727	Lbh
-0.6166	3.367	0.2076	Sesn2
-0.6162	5.772	0.02559	Mtpn
-0.6155	8.754	0.002812	Cables1
-0.6153	3.879	0.3005	Baiap2
-0.615	4.761	0.07184	Rab32
-0.6138	3.595	0.4809	Glo1
-0.613	6.252	0.1451	Lrp12
-0.6123	6.188	0.3335	Spred2
-0.6122	3.428	0.2793	Mrpl52
-0.6118	3.231	0.4282	Pgam1
-0.6114	6.459	0.009023	Ldhb
-0.6112	4.46	0.3061	Ier2
-0.6103	3.271	0.2069	Ift20
-0.6089	3.208	0.3118	Trmt112
-0.6086	7.473	0.003116	Tspan7
-0.6086	6.838	0.03164	Btg1
-0.608	5.257	0.04037	Cldnd1
-0.6077	3.485	0.2303	Zfp563
-0.6062	3.932	0.1884	Xab2
-0.6062	2.585	0.3847	2700062C07Rik
-0.6061	2.697	0.5307	Trdmt1
-0.606	4.363	0.1227	Cox8a
-0.6057	6.371	0.01388	Plod1
-0.6054	6.772	0.009553	Fcgr1
-0.6033	6.796	0.02745	Coro1a
-0.6026	6.474	0.1174	Junb
-0.601	6.184	0.1251	Glis3
-0.6009	6.707	0.01244	Bhlhe41
-0.6003	6.359	0.008176	Gng10
-0.6002	2.847	0.3457	Zswim9
-0.5992	6.01	0.0182	Tmem86a
-0.5987	7.43	0.1126	Srgn
-0.5981	3.569	0.211	ENSMUSG00000120144
-0.5976	5.469	0.2899	Rpl32
-0.5966	3.677	0.3013	Dis3
-0.5965	7.196	0.01332	Spred1
-0.5956	6.796	0.03416	Ralgps2
-0.5946	6.487	0.008035	Prpf8
-0.5943	5.014	0.05808	Arl1
-0.594	2.856	0.2688	Gtpbp6
-0.5932	3.517	0.211	Ndufa13
-0.5928	3.624	0.6052	Ccl12
-0.592	7.066	0.01071	Ogfrl1
-0.5907	7.363	0.01002	Ptms
-0.5903	4.233	0.29	Taf13
-0.5901	4.528	0.2055	Usp11
-0.5896	6.017	0.079	Pdia4
-0.5889	5.001	0.04215	Leprotl1
-0.5879	3.292	0.3135	Thbs1
-0.5875	7.398	0.008498	Itm2c
-0.587	5.843	0.04595	Tnfsf13b
-0.587	3.121	0.2623	Ddah2
-0.5868	3.646	0.2888	Zfp799
-0.5849	4.673	0.1294	Lrrc59
-0.5845	5.811	0.248	Nr4a1
-0.5839	3.974	0.1734	Bub3
-0.5833	4.057	0.2124	Slc30a4
-0.583	3.421	0.3331	Taf6
-0.582	4.428	0.3187	Fam217b
-0.5804	10.52	0.04311	P2ry12
-0.5802	3.743	0.2985	1110032A03Rik
-0.5799	5.404	0.4332	Prickle1
-0.5797	7.125	0.01116	Myo1b
-0.5794	3.544	0.2207	Med28
-0.5793	3.422	0.5884	Lmtk2
-0.5788	5.714	0.03088	Eif5a
-0.5784	7.474	0.6055	ENSMUSG00000120942
-0.5777	3.674	0.2038	Hypk
-0.5764	3.72	0.1696	Gm26759
-0.5761	4.34	0.1039	Afdn
-0.5753	3.26	0.3731	Klf10
-0.5747	2.987	0.2861	2410004B18Rik
-0.5745	4.96	0.06461	Tm7sf3
-0.5745	3.821	0.2365	Ybx3
-0.5744	6.061	0.01503	Cops4
-0.5742	4.43	0.1817	Coa5
-0.5741	3.291	0.3439	Med21
-0.5734	8.382	0.003804	Gnas
-0.5727	3.843	0.523	Egr3
-0.5721	6.665	0.188	Dnajb4
-0.5714	4.333	0.1146	Sec13
-0.5712	3.748	0.1871	Rfc2
-0.5708	3.843	0.1596	Tceal9
-0.5701	7.146	0.01089	Arl6ip1
-0.5689	6.117	0.01954	Tubb5
-0.5687	4.494	0.1069	Atraid
-0.5683	6.667	0.03421	Alox5ap
-0.5679	6.436	0.1976	Dusp16
-0.5679	2.978	0.4143	Tnfsf12
-0.5672	6.558	0.02846	Vps37b
-0.5671	3.33	0.2965	Vegfb
-0.5668	3.886	0.188	Chchd2
-0.5663	2.932	0.3194	Llgl1
-0.5659	2.837	0.303	Cand2
-0.5647	4.124	0.1362	Gm20544
-0.5645	4.215	0.1185	Btf3
-0.5637	3.095	0.308	Dus2
-0.5634	4.297	0.1525	Cops7a
-0.5631	4.447	0.1342	Hexim1
-0.5631	3.992	0.3206	Ebag9
-0.5625	2.761	0.4773	Fadd
-0.562	5.129	0.05959	Stxbp4
-0.5616	3.891	0.1884	Nedd8
-0.5605	5.818	0.03535	Yaf2
-0.5605	3.696	0.2541	4933433G15Rik
-0.5602	3.901	0.1378	Gpx4
-0.5599	5.281	0.05332	Ppib
-0.5597	5.466	0.6605	Amotl1
-0.5594	4.997	0.188	Gm44710
-0.5583	6.519	0.02188	Usp6nl
-0.5582	3.333	0.3148	Snu13
-0.5578	2.852	0.3086	Nop9
-0.5578	3.258	0.3261	Smpd1
-0.5576	3.705	0.2827	Gm49393
-0.557	10.25	0.000789	Sparc
-0.5562	4.105	0.1517	Gpam
-0.556	4.899	0.04922	Grsf1
-0.5557	6.158	0.02652	Selenot
-0.5556	3.154	0.4099	Slc12a4
-0.5549	3.329	0.3422	H2az2
-0.5543	5.022	0.05141	Aldh3a2
-0.5543	3.903	0.3425	3110009E18Rik
-0.5542	5.149	0.1531	Pnp
-0.5542	2.619	0.4623	Klhl8
-0.553	7.378	0.01056	Ywhaz
-0.5527	4.219	0.1878	Tmem9b
-0.552	6.725	0.07196	Soat1
-0.5515	2.957	0.347	Zfp429
-0.551	3.153	0.5566	Eaf2
-0.5501	5.437	0.1858	Rps11
-0.55	7.491	0.1897	Zfand5
-0.55	3.523	0.2035	Extl2
-0.5498	3.682	0.5854	Itgax
-0.5497	2.893	0.3992	Gins4
-0.5494	5.339	0.0809	Tmco1
-0.5493	2.888	0.3116	Lsm8
-0.5477	8	0.006465	Calm2
-0.5475	5.049	0.1394	Cd302
-0.5474	3.335	0.3127	Tmem115
-0.5464	4.748	0.1092	Csnk1g2
-0.5463	6.325	0.07716	Eprs
-0.5463	3.131	0.3922	Kif9
-0.5462	3.054	0.3422	Qtrt1
-0.5459	5.182	0.04697	Camk2n1
-0.5459	5.085	0.2228	Rpl12
-0.5457	6.448	0.1535	Adrb2
-0.5452	3.057	0.4413	4833438C02Rik
-0.5446	3.495	0.3438	Hlx
-0.544	4.113	0.1657	Atp5h
-0.544	2.97	0.381	Mrps14
-0.5435	2.704	0.438	Myo19
-0.5433	5.601	0.03803	Myadm
-0.5433	4.274	0.2139	H1f0
-0.5424	3.111	0.3715	Fbxw10
-0.5422	5.796	0.03891	Trp53bp2
-0.5421	5.773	0.07271	Dstn
-0.5416	5.628	0.2908	Rplp0
-0.5414	4.98	0.09673	Cwc15
-0.5407	3.454	0.5289	Gm9725
-0.5393	2.7	0.4413	Smyd2
-0.5392	5.379	0.2424	Rpsa
-0.5392	5.614	0.3295	Rpl14
-0.5377	3.733	0.2263	Fads3
-0.5374	4.045	0.2075	Otud1
-0.5365	6.42	0.02553	Spcs2
-0.5361	5.218	0.1608	Spns2
-0.5356	10.27	0.003804	Selenop
-0.5354	4.52	0.1696	Rbm42
-0.5345	4.255	0.2085	Map2k3
-0.5345	3.978	0.2898	Acads
-0.5339	2.726	0.399	Mcm7
-0.5336	4.267	0.3061	Sema3c
-0.533	6.783	0.5241	Senp7
-0.5328	2.964	0.3087	Mtbp
-0.5325	2.778	0.4964	Zscan25
-0.5321	2.81	0.4287	Spring1
-0.5319	5.721	0.1722	Rpl13
-0.5319	3.768	0.2544	Oser1
-0.5317	7.522	0.01272	Tyrobp
-0.5317	6.657	0.03604	Wdr1
-0.5315	5.28	0.6209	Adcy8
-0.5303	5.915	0.06461	Gngt2
-0.5295	4.983	0.1116	Rpl9
-0.529	3.079	0.479	Gpr137
-0.5288	4.01	0.2793	Nsun3
-0.5288	6.625	0.409	Plekho2
-0.5287	6.734	0.1146	Azin1
-0.5284	4.718	0.1903	Hfe
-0.5282	8.731	0.1462	Pdia3
-0.5281	5.35	0.12	Slc39a10
-0.528	3.249	0.38	Ndufb7
-0.5279	8.29	0.1058	Rgs2
-0.5267	7.115	0.0223	Tlr13
-0.5265	4.911	0.1224	Vdac1
-0.5263	7.173	0.05103	Klf7
-0.5261	6.541	0.1544	Stk17b
-0.5251	5.034	0.1068	Fam20b
-0.5239	4.373	0.1977	Slc7a6os
-0.5233	7.083	0.827	Gatm
-0.5232	2.838	0.3221	Gbp3
-0.5231	6.451	0.2303	Tbc1d4
-0.5228	7.588	0.4098	Atf3
-0.5228	8.379	0.4931	Hpgd
-0.5222	3.709	0.1864	Esd
-0.5218	3.254	0.3295	Gorasp1
-0.5215	8.541	0.08722	Rin2
-0.5205	3.504	0.2707	Cstf1
-0.5203	7.262	0.3117	Zfp36
-0.5201	3.67	0.2541	Mlx
-0.5189	2.862	0.3806	Psmd10
-0.518	3.787	0.3252	Blm
-0.5176	6.361	0.1878	Dnaja1
-0.517	3.138	0.314	Pdzd11
-0.5166	3.373	0.308	Pofut2
-0.5162	4.275	0.2055	Fam3a
-0.516	5.356	0.105	Slc39a12
-0.5157	2.977	0.3902	Mex3b
-0.5155	7.265	0.1516	Btg2
-0.5154	4.631	0.1689	Hk1
-0.5153	6.669	0.442	Khdrbs3
-0.5151	4.987	0.1063	Mgat2
-0.5147	6.18	0.05369	Reep5
-0.5139	3.587	0.4151	Mpc2
-0.5136	3.658	0.2497	Tor1a
-0.5132	3.598	0.2758	Naf1
-0.5127	3.695	0.2331	Guf1
-0.5125	6.748	0.03421	P4hb
-0.5109	5.798	0.1604	Ccl6
-0.5109	5.619	0.4477	Ccl3
-0.5108	5.648	0.1139	Ppia
-0.5106	5.986	0.04731	Zfp706
-0.5103	6.957	0.01359	Tifab
-0.5103	3.833	0.2206	Megf11
-0.5096	5.054	0.09717	Arf6
-0.5094	7.626	0.01182	Samsn1
-0.5089	2.96	0.3449	Myg1
-0.5088	4.983	0.09998	Lactb
-0.5085	2.996	0.751	Zswim3
-0.5081	6.111	0.045	Arl6ip5
-0.5068	5.95	0.196	Fau
-0.5065	3.318	0.3586	Rmnd5b
-0.5064	5.394	0.1551	Rpl11
-0.5062	6.42	0.04951	Rnls
-0.506	3.809	0.3565	Tmem222
-0.5059	3.285	0.6308	2610307P16Rik
-0.5054	3.418	0.3601	6230400D17Rik
-0.505	5.076	0.2206	Rps15a
-0.5044	3.235	0.4242	Agpat2
-0.5038	5.071	0.2325	Slc35c2
-0.5038	3.266	0.3554	Nxpe3
-0.5036	5.122	0.07891	Ppp1ca
-0.5027	5.424	0.05454	Hnrnph3
-0.5025	7.281	0.05814	Evi2
-0.5022	3.842	0.2293	Gatc
-0.5017	3.589	0.2718	Stoml1
-0.5013	4.678	0.1637	Dynlt3
-0.5012	5.389	0.2235	Rpl26
-0.5009	5.115	0.1451	Tuba1a
-0.5005	3.634	0.2704	Nit1
-0.4998	3.729	0.3806	Siah2
-0.4997	4.416	0.1933	Psma4
-0.4993	4.573	0.3659	Cebpb
-0.4983	3.679	0.3006	Tmem18
-0.4983	3.038	0.441	Pebp1
-0.498	5.517	0.1181	Prdx1
-0.498	3.661	0.3696	Ltv1
-0.4971	3.201	0.424	Espl1
-0.4964	7.245	0.05994	Vps41
-0.4964	2.675	0.4195	Zkscan5
-0.4962	5.405	0.1212	Asah2
-0.496	3.736	0.2432	Eif2b4
-0.4956	4.466	0.1301	Sgpp1
-0.4945	9.023	0.006075	P2ry13
-0.4945	3.451	0.3049	Hmga1
-0.4941	7.785	0.06925	Cd164
-0.4941	7.164	0.3926	Mapkapk2
-0.4937	4.893	0.1358	Gm49368
-0.4929	3.45	0.4936	Smc2
-0.4925	7.332	0.05103	Tspan18
-0.4922	4.924	0.1123	Gosr1
-0.492	8.391	0.004209	Ctsc
-0.4919	3.713	0.3016	Sf3a2
-0.4918	7.123	0.01739	Pfn1
-0.4918	3.691	0.3525	Rabggtb
-0.4916	8.501	0.006324	Tln1
-0.4916	5.175	0.1367	Rps18
-0.491	3.069	0.3895	Ddx39a
-0.4909	5.93	0.2785	Tmem176b
-0.4906	3.562	0.3676	Ndufv3
-0.4905	4.858	0.1601	Lamtor1
-0.4903	3.943	0.4053	Rpl27a
-0.49	7.724	0.01056	Sdcbp
-0.4893	5.76	0.1366	Rpl5
-0.488	4.233	0.3296	Atp6v1f
-0.487	8.266	0.034	Hsp90ab1
-0.4869	2.96	0.3837	Cox5b
-0.4864	6.286	0.04731	Gclc
-0.4862	4.329	0.3463	Eif3f
-0.4861	4.604	0.2439	Sod1
-0.4861	5.387	0.3964	Farp1
-0.4856	3.738	0.2726	Zfp790
-0.4852	2.832	0.38	Gm13483
-0.4847	8.304	0.005675	Cap1
-0.484	5.049	0.09115	Lrp10
-0.4838	4.101	0.3004	Ssr2
-0.4831	4.564	0.1659	Slc39a1
-0.4831	2.971	0.4584	Banf1
-0.4827	6.647	0.03605	Bsg
-0.4826	4.113	0.3348	Ube2s
-0.4823	2.43	0.6316	Dtna
-0.4822	5.749	0.04879	Arpc3
-0.4819	4.972	0.2905	Psme1
-0.4819	4.915	0.2905	Cox4i1
-0.4819	3.208	0.4616	Adtrp
-0.4816	3.534	0.3251	Ncaph
-0.4812	4.615	0.3526	Top3a
-0.4809	4.278	0.3806	Gch1
-0.4806	5.377	0.07881	Gm44503
-0.4806	5.086	0.1084	Trim28
-0.4804	7.08	0.08897	H3f3b
-0.4803	6.154	0.1473	Gas6
-0.48	8.83	0.01063	Canx
-0.4795	3.606	0.3439	Aip
-0.4793	4.57	0.2078	Psma2
-0.4792	3.338	0.3629	Sc5d
-0.4791	6.14	0.09337	Sorl1
-0.4789	6.808	0.03812	Morf4l1
-0.4787	4.91	0.1336	Mdh1
-0.4784	3.225	0.3422	Smn1
-0.4782	4.763	0.1861	Ap5m1
-0.4777	4.988	0.1347	Nagpa
-0.4775	6.622	0.02958	Tmem59
-0.4774	5.03	0.1485	Rps2
-0.4774	4.763	0.2412	2810013P06Rik
-0.4764	5.021	0.1793	Rpl24
-0.4763	5.217	0.2254	Ifi30
-0.4761	6.696	0.08221	Etf1
-0.4761	3.29	0.46	Sik1
-0.4758	4.326	0.2521	Cdc16
-0.4755	5.083	0.119	Synj2
-0.4754	6.119	0.07554	Ptbp1
-0.4752	7.944	0.02683	Gcnt1
-0.4751	3.121	0.3666	Gm49369
-0.4748	4.505	0.3621	Heatr6
-0.4746	8.921	0.2004	Eef1a1
-0.4744	3.105	0.381	Gm45777
-0.4743	3.738	0.3327	Zfp386
-0.4742	3.64	0.3219	E430024P14Rik
-0.474	5.222	0.09547	Gbp7
-0.4735	4.749	0.1478	Kdelr1
-0.4735	2.891	0.4657	Nsmce3
-0.4732	7.405	0.07554	Mapre2
-0.473	4.437	0.2092	Psmb8
-0.4728	5.823	0.1881	Cbx4
-0.4726	3.731	0.3215	Rps6ka4
-0.4721	7.606	0.00748	Ywhae
-0.4715	4.284	0.1976	Cdkn2aipnl
-0.4715	3.004	0.5426	Prdx4
-0.4712	5.137	0.206	Rpl23a
-0.471	4.271	0.3169	Tmem94
-0.4702	4.602	0.2321	Rpl30
-0.4697	3.463	0.4053	Cdkl4
-0.4697	2.911	0.4504	Slc25a20
-0.4693	9.976	0.1266	Plek
-0.4693	2.889	0.4062	Hscb
-0.4692	4.439	0.2104	Galnt4
-0.4688	3.084	0.4927	Chrac1
-0.4686	4.447	0.2684	Rtraf
-0.4685	5.273	0.1616	Stk38l
-0.4683	6.506	0.06805	Slc44a2
-0.4678	3.639	0.3184	Cnpy2
-0.4678	3.574	0.3455	Mfsd5
-0.4677	4.04	0.2055	Rnf7
-0.4677	4.751	0.2108	Psmc1
-0.4674	6.084	0.2296	Rplp1
-0.4673	4.447	0.2649	Afap1
-0.4672	7.298	0.01261	Hmgb1
-0.4665	4.472	0.3477	Gmeb2
-0.4663	2.719	0.523	Gm12940
-0.466	6.459	0.05918	Saraf
-0.4659	6.377	0.04442	Magt1
-0.4645	5.658	0.05918	Micos10
-0.4644	8.277	0.249	Il1a
-0.4642	7.017	0.05814	Cd68
-0.4641	4.468	0.1548	Rnf187
-0.4639	5.509	0.1914	Rps27a
-0.463	6.196	0.1147	Ripk2
-0.4628	5.323	0.09837	Med26
-0.4627	11.22	0.05814	Ctss
-0.4623	5.581	0.0659	Zdhhc5
-0.4622	5.573	0.0955	Copb2
-0.462	3.563	0.373	Smpd4
-0.4616	4.722	0.2395	Clec4a2
-0.4614	3.374	0.3621	Mtrr
-0.4611	5.178	0.2128	Tspan3
-0.4608	6.618	0.4503	Tnfaip3
-0.4606	4.601	0.1988	Mmd
-0.4604	3.906	0.317	Tet1
-0.4604	3.119	0.5094	F9
-0.4598	2.704	0.6775	Rfxap
-0.4596	3.096	0.532	Lrrc8b
-0.4595	4.705	0.1883	Kdelr2
-0.4591	2.923	0.4048	1810009A15Rik
-0.459	4.295	0.2728	Klk8
-0.4588	5.77	0.1008	Sypl
-0.4586	4.045	0.3977	Trmt10a
-0.458	6.189	0.04405	Selenof
-0.4579	10.69	0.002053	Lgmn
-0.4579	3.272	0.4151	C330018D20Rik
-0.4571	7.3	0.0461	Rgl1
-0.4571	5.137	0.2151	Rpl31
-0.4565	5.228	0.1323	Mlf2
-0.4564	4.151	0.2408	Thoc7
-0.4563	3.807	0.308	Mttp
-0.4562	3.131	0.3866	Ndufs7
-0.4561	6.316	0.06461	Sdf4
-0.4552	9.933	0.007335	Itm2b
-0.4551	8.391	0.034	Cdh23
-0.4547	3.596	0.3697	2210016F16Rik
-0.4547	3.169	0.6121	Gpr65
-0.4544	4.766	0.18	Mtfr1l
-0.4542	4.375	0.2337	Rabac1
-0.4539	4.972	0.1534	Ap1m1
-0.4533	4.658	0.3633	Tmem44
-0.4532	3.596	0.329	Lamtor5
-0.4532	3.779	0.4143	Cstb
-0.4531	4.726	0.1485	Emc7
-0.453	4.665	0.2019	Chmp5
-0.4522	4.556	0.2412	Cacybp
-0.4519	3.988	0.2471	Zdhhc7
-0.4519	7.653	0.4074	Rasgef1b
-0.4517	4.366	0.1969	Vps4a
-0.4512	10.64	0.1955	Ctsd
-0.451	2.971	0.5167	Zfp267
-0.4505	4.911	0.2092	Ccdc122
-0.4504	5.77	0.1951	Jund
-0.4504	4.398	0.2225	Atxn1l
-0.4504	2.939	0.4382	Rtca
-0.4499	8.374	0.04273	Calr
-0.4488	3.417	0.4678	Kbtbd7
-0.4487	2.933	0.4864	Rnaseh1
-0.4486	5.979	0.2226	Rps8
-0.4484	3.705	0.3461	Rpl22l1
-0.448	3.219	0.4486	Gm54867
-0.4479	3.224	0.4082	Mrgbp
-0.4478	5.359	0.1789	Rpl7a
-0.4477	3.475	0.3857	Agtrap
-0.4477	3.386	0.4151	Mlycd
-0.4475	4.648	0.2341	Vps9d1
-0.4472	2.947	0.5515	Dnlz
-0.4471	4.473	0.6659	H1f2
-0.4463	6.728	0.05619	Cnbp
-0.4462	9.07	0.03059	Hsp90b1
-0.4461	5.679	0.09257	Lman2
-0.4461	5.142	0.1529	Ergic3
-0.4458	8.691	0.006143	Lcp1
-0.4456	4.255	0.2423	Ppp1r8
-0.4455	4.389	0.2456	Gtf2f1
-0.4453	4.003	0.2574	Ugdh
-0.4452	2.99	0.4496	Pdcd6
-0.445	6.1	0.08832	Kdm6b
-0.4449	3.562	0.6372	Sgsh
-0.4442	8.451	0.005298	Efhd2
-0.444	5.345	0.1719	Ipo5
-0.4437	2.811	0.636	Bend3
-0.4435	2.94	0.449	Gm19708
-0.443	8.374	0.009023	Bin2
-0.4429	4.555	0.2472	Fosl2
-0.4425	5.291	0.2254	Drg1
-0.4421	4.396	0.4262	Pirb
-0.442	6.658	0.0342	Sall3
-0.4418	3.686	0.4355	Asb8
-0.4417	5.418	0.1091	Fuca1
-0.4417	7.184	0.4288	Nfkbiz
-0.4417	3.262	0.5692	Dnajc12
-0.4415	3.293	0.4659	Gm11944
-0.4411	6.943	0.0235	Prkar1a
-0.4411	6.655	0.04594	Rad51b
-0.4411	6.54	0.3181	Pdia6
-0.4408	4.26	0.2973	Dynlrb1
-0.4397	3.629	0.5004	Adgrl1
-0.4394	6.648	0.05976	Hnrnpab
-0.4393	3.614	0.3263	Cinp
-0.4392	6.274	0.1134	Csnk1g3
-0.4391	5.437	0.07397	Tiprl
-0.4391	3.143	0.392	Efcab2
-0.4383	8.981	0.09184	Glul
-0.4382	3.07	0.4361	Pagr1a
-0.438	5.993	0.08651	Tnfrsf1a
-0.438	3.409	0.4448	Rmdn3
-0.438	2.328	0.8879	Gm42047
-0.4378	7.663	0.01359	Rac1
-0.4376	4.949	0.211	Arap2
-0.4376	3.468	0.4394	Ralgds
-0.4374	7.405	0.01333	Clta
-0.4373	3.427	0.3842	ENSMUSG00000119955
-0.4372	4.035	0.3831	Hsdl1
-0.4369	3.482	0.3596	Mtg2
-0.4369	3.16	0.3621	Taf10
-0.4367	4.871	0.1884	Emc1
-0.4363	6.122	0.09046	Nucks1
-0.4363	5.142	0.1502	Pbx2
-0.4362	3.21	0.4419	Ndufb10
-0.4361	6.188	0.06972	Xbp1
-0.4359	4.266	0.2673	Ndufs2
-0.4357	4.916	0.2264	Hrh2
-0.4357	4.362	0.3751	Arpc5l
-0.4356	4.65	0.2541	Vps45
-0.4351	6.506	0.2541	Bcl2a1b
-0.4348	5.569	0.1363	Ganab
-0.4345	3.575	0.3799	Igtp
-0.4344	4.118	0.2516	Isyna1
-0.4344	4.267	0.3043	H2az1
-0.434	2.881	0.499	Exosc2
-0.4336	5.891	0.08562	Hhex
-0.4336	4.693	0.2612	Myh10
-0.433	4.513	0.293	Spg21
-0.4326	5.62	0.08562	Spg20
-0.4326	6.36	0.09541	Ipo9
-0.4326	7.922	0.128	Eef2
-0.4324	5.317	0.1816	Myl12a
-0.432	5.82	0.06577	Adora3
-0.432	3.866	0.3211	Hmox1
-0.4318	4.956	0.1362	Eloc
-0.4318	2.678	0.7516	Efcab6
-0.4315	8.143	0.1462	Txnip
-0.4314	4.747	0.301	Tmem167
-0.4307	4.13	0.2668	Mydgf
-0.4305	6.97	0.07081	Smad7
-0.4297	6.087	0.1601	Rps3
-0.4296	4.558	0.2093	Arpc1a
-0.4296	3.675	0.3471	Nans
-0.4294	5.417	0.1315	Ctbp1
-0.4291	10.03	0.01089	Marcks
-0.429	2.587	0.6197	Casp6
-0.4289	8.127	0.01063	App
-0.4284	4.931	0.2788	Rnf34
-0.4283	3.846	0.293	Rbbp9
-0.4281	4.057	0.3682	Zfp770
-0.4274	8.029	0.1523	Rhoh
-0.4271	3.279	0.4273	Sap30
-0.427	4.966	0.3621	Csrnp1
-0.4269	4.709	0.1817	Prkaca
-0.4269	4.411	0.3301	Tmed2
-0.4266	5.685	0.6121	ENSMUSG00000121207
-0.4253	3.663	0.4263	Phospho1
-0.4245	8.343	0.0276	Rhob
-0.4245	2.711	0.5782	Cep131
-0.424	5.236	0.2007	Ppp1r13b
-0.4237	6.25	0.1392	Nt5dc1
-0.4236	7.696	0.01843	Atf6
-0.4236	6.739	0.06461	Eif1
-0.423	5.307	0.1584	Samd4b
-0.423	4.415	0.3532	Osm
-0.4229	5.563	0.1181	Cnot8
-0.4229	4.353	0.3421	Gm19689
-0.4229	3.996	0.3733	Eif1b
-0.4228	4.855	0.2228	ENSMUSG00000121277
-0.4221	3.996	0.3439	Psmb4
-0.4219	7.228	0.03386	Ptma
-0.4219	4.438	0.2358	Gpsm3
-0.4218	4.462	0.1963	Bcl7b
-0.4217	5.862	0.06805	Skp1
-0.4217	3.143	0.4283	Gm45472
-0.4216	6.103	0.06797	Cln8
-0.4214	5.483	0.1583	Tspan31
-0.4211	3.372	0.4855	Ndufa7
-0.421	3.766	0.4286	Ormdl1
-0.4207	4.349	0.2611	Mpdu1
-0.4205	2.808	0.5546	Kalrn
-0.4203	5.278	0.1604	Cse1l
-0.4203	6.091	0.3016	Ighm
-0.42	4.607	0.2587	Ssr4
-0.42	5.958	0.2965	Hspa12a
-0.4198	2.975	0.5586	Cox11
-0.4197	3.738	0.487	Adi1
-0.4197	2.796	0.4892	Ranbp6
-0.4195	10.02	0.01459	Rapgef5
-0.4195	5.359	0.118	Cat
-0.4195	6.893	0.4614	Creb5
-0.419	5.256	0.3073	Rps6
-0.419	4.305	0.4167	Odc1
-0.419	2.869	0.494	Mrpl50
-0.4183	7.076	0.04351	Hcls1
-0.4173	2.931	0.5324	Mycbp
-0.4167	4.165	0.4384	Cstf2
-0.4164	3.436	0.3479	Chmp6
-0.4162	3.507	0.4288	Sros1
-0.4161	4.808	0.1712	Rnf11
-0.4157	4.433	0.5163	Cdkn1a
-0.4156	3.592	0.4191	0610010K14Rik
-0.4155	5.656	0.1086	Dennd2c
-0.4153	3.719	0.5289	Eif3i
-0.4152	6.649	0.07701	Klhl6
-0.4148	3.905	0.4099	Zcchc9
-0.4147	7.528	0.275	Acsl4
-0.4146	4.852	0.2648	Hmgb2
-0.4142	5.579	0.1403	Hyou1
-0.4142	3.641	0.4659	ENSMUSG00000120863
-0.4141	4.072	0.2613	Dr1
-0.4138	5.765	0.27	Rack1
-0.4137	3.972	0.3565	Hes1
-0.4133	6.804	0.024	Arf1
-0.4133	2.914	0.5573	Ninj2
-0.413	11.9	0.007086	Hexb
-0.4129	3.854	0.351	Slc18b1
-0.4128	5.423	0.284	Txlna
-0.4123	3.884	0.4392	Bap1
-0.4122	5.794	0.3098	Rplp2
-0.4119	4.236	0.2388	Ndufc2
-0.4116	7.094	0.02559	Ccni
-0.4116	7.248	0.0448	Npc1
-0.4113	6.116	0.07891	Wdfy1
-0.4113	4.714	0.3406	Mpv17l
-0.4111	4.388	0.2919	Cyb5r3
-0.4111	2.764	0.5966	Gm17690
-0.411	5.018	0.5017	Gm37352
-0.4102	3.995	0.5357	Rhbdf2
-0.4094	5.377	0.1128	Sec11c
-0.4092	3.529	0.4022	Bmyc
-0.408	5.441	0.2403	Dcp2
-0.4079	6.678	0.07535	Il17ra
-0.4079	6.091	0.1046	Pnrc1
-0.4079	3.796	0.468	Tmem70
-0.4077	3.573	0.4448	Mrpl39
-0.4077	5.594	0.538	Ccl4
-0.4074	4.964	0.1694	Nsfl1c
-0.4072	4.803	0.2176	Eftud2
-0.4072	3.639	0.46	Slc30a1
-0.4069	8.382	0.0461	Grn
-0.4067	8.455	0.00722	Ifngr1
-0.4067	4.589	0.5033	Psme2
-0.4065	3.599	0.4445	Cdca7
-0.4061	3.762	0.4052	Eif1ax
-0.4055	5.013	0.2573	Zfp655
-0.4053	8.031	0.01292	Adgre1
-0.4052	3.765	0.3487	Tm2d2
-0.405	6.613	0.532	Cux2
-0.4049	8.395	0.2075	Hspa5
-0.4048	5.327	0.3538	Rps27
-0.4043	5.088	0.2303	Ldha
-0.4043	4.303	0.3073	Gm9949
-0.4041	3.696	0.4548	Dynlt2b
-0.4039	3.149	0.5106	Atp5o - ENSMUSG00000022956
-0.4036	3.961	0.3565	Tmed3
-0.4036	5.003	0.4928	Tiparp
-0.4034	6.766	0.09801	Nfya
-0.4029	5.64	0.1377	Capns1
-0.4027	4.193	0.2874	Rxylt1
-0.4026	3.653	0.3847	Fzd4
-0.4025	4.433	0.3584	Nmd3
-0.4024	3.252	0.4705	Zfp319
-0.4021	3.527	0.4763	Slc48a1
-0.4019	5.226	0.118	Ccpg1
-0.4019	5.111	0.1955	Tpbgl
-0.4017	9.235	0.01672	Basp1
-0.4005	3.177	0.551	Xylt2
-0.4	4.762	0.2937	Wars1
-0.3996	5.546	0.1584	Txnrd1
-0.3996	5.435	0.4904	Osbpl2
-0.3993	8.416	0.02719	Eif4g2
-0.3991	6.4	0.05497	Nova1
-0.399	8.625	0.01063	Capza2
-0.3989	3.782	0.6164	Gm13391
-0.3987	7.212	0.05808	Arhgdia
-0.3987	4.071	0.3081	Jpt2
-0.3983	3.097	0.4721	Nsmce1
-0.398	3.687	0.4096	Rraga
-0.3977	3.868	0.4888	Kcnip1
-0.3975	4.476	0.3538	Polr2m
-0.3975	3.307	0.4445	Polm
-0.3973	5.44	0.2897	Papss1
-0.397	6.852	0.06461	Ywhab
-0.3964	4.987	0.2176	Slc39a7
-0.3959	3.884	0.4408	Rpl27
-0.3958	6.021	0.09753	Akt1
-0.3958	3.324	0.5714	Prelid1
-0.3956	5.61	0.09698	Zfp827
-0.3955	6.248	0.1499	Ubqln1
-0.3953	3.784	0.3363	Plscr3
-0.3952	5.314	0.4262	Rpl37
-0.3952	3.568	0.4633	Zfp868
-0.3951	5.016	0.4045	Atox1
-0.394	7.961	0.0375	Tmbim6
-0.394	5.136	0.4866	4933421O10Rik
-0.3939	4.83	0.2075	Bbip1
-0.3938	5.701	0.4408	Tpt1
-0.3936	3.002	0.5467	Ebpl
-0.3926	6.253	0.06461	Eloa
-0.3926	4.451	0.3431	Sec23ip
-0.3925	4.595	0.4419	Lcmt1
-0.3921	3.027	0.4777	Dck
-0.3919	11.12	0.003804	Csf1r
-0.3917	7.81	0.118	Ywhah
-0.3917	3.806	0.4283	Uqcrh
-0.3914	2.926	0.599	Pla2g6
-0.3911	7.7	0.05192	Sfmbt1
-0.3908	5.621	0.1861	Mta2
-0.3907	3.996	0.4365	Msh6
-0.3901	3.696	0.4276	Polr2e
-0.39	6.128	0.1655	Derl1
-0.3895	4.17	0.4356	Rab5if
-0.3893	8.051	0.1985	Pfkfb3
-0.389	3.888	0.4187	Spcs1
-0.3884	4.145	0.315	Ramp2
-0.3881	3.214	0.489	Yju2
-0.3879	4.46	0.3432	Gm31763
-0.3879	2.886	0.5191	ENSMUSG00000121275
-0.3878	4.902	0.3086	Eno1
-0.3878	4.937	0.5506	Tmem176a
-0.3875	4.746	0.2226	Mdh2
-0.3873	7.27	0.08934	Polr2a
-0.3869	5.552	0.1864	Cmas
-0.3868	7.172	0.2153	Rpl4
-0.3867	3.929	0.6837	Cfap43
-0.3866	5.555	0.1692	Cnpy3
-0.3862	4.334	0.3422	Cdk4
-0.3861	3.793	0.5407	Prmt1
-0.386	5.927	0.3084	Rpl17
-0.3859	6.475	0.06577	Ghitm
-0.3858	7.92	0.03312	Hexa
-0.3856	2.883	0.6108	Ptprcap
-0.3854	8.286	0.01333	Gnai2
-0.3853	4.781	0.2898	Tle5
-0.3853	4.192	0.314	Zfp141
-0.3849	3.694	0.4357	Pnpo
-0.3846	3.19	0.4936	Ccdc71
-0.3845	4.746	0.3565	Gpat4
-0.3839	7.09	0.02763	Atp6v0a2
-0.3838	5.53	0.2228	Zyx
-0.3838	3.952	0.5281	Pcdhgc4
-0.3833	5.299	0.2544	Atp6v0e
-0.3831	7.598	0.04922	Cryl1
-0.3831	9.109	0.07227	Jarid2
-0.3819	8.051	0.04595	Ppp1r21
-0.3818	6.537	0.2321	Ugt1a6a
-0.3816	9.886	0.04435	Lrp1
-0.3814	4.686	0.2264	Slc25a11
-0.3813	7.022	0.08986	Arl8b
-0.3809	5.691	0.1093	Flii
-0.3802	2.927	0.5039	Spata7
-0.38	6.418	0.1146	Akr1a1
-0.3799	6.54	0.1069	Atp6ap1
-0.3797	6.136	0.08479	Rgmb
-0.3792	6.998	0.0933	Arl4c
-0.379	7.149	0.03605	Laptm4a
-0.3789	3.609	0.489	Fasn
-0.3785	11.64	0.2471	Camk1d
-0.3785	4.686	0.249	Glmp
-0.3784	5.148	0.2436	Rcn2
-0.378	3.962	0.602	Trim17
-0.3778	6.038	0.07022	Ppp3r1
-0.3778	4.489	0.3597	Golt1b
-0.3777	6.239	0.181	Sub1
-0.3774	3.121	0.5377	ENSMUSG00000120371
-0.3761	3.955	0.3899	Srd5a3
-0.3755	7.826	0.123	Ly6e
-0.3753	6.138	0.1507	Tbc1d1
-0.3751	3.519	0.5246	Zkscan7
-0.375	4.408	0.3006	Strap
-0.375	4.261	0.3632	Ei24
-0.3749	7.669	0.03471	Pla2g15
-0.3748	7.145	0.2454	Kpna1
-0.3744	4.637	0.3803	Nrep
-0.3743	3.798	0.4446	Tlr12
-0.3742	3.594	0.6349	H1f3
-0.3741	4.059	0.3363	Sod2
-0.3741	3.302	0.441	Snhg8
-0.3739	4.761	0.4002	Rpl34
-0.3735	3.862	0.4631	Dok3
-0.3734	5.21	0.3135	Rpl7
-0.3732	6.97	0.09029	Kras
-0.3732	5.377	0.1894	Adam9
-0.3732	4.409	0.4297	4930444A19Rik
-0.3729	9.929	0.045	Selplg
-0.3729	8.187	0.05814	Tjp1
-0.3729	4.854	0.3831	BC005624
-0.3724	5.034	0.1864	Dhx32
-0.3723	6.346	0.2415	H3f3a
-0.3723	2.982	0.5534	Toe1
-0.3717	6.931	0.085	Atp1a1
-0.3717	5.282	0.4283	Eva1a
-0.3717	3.182	0.5089	Mrpl18
-0.3713	6.371	0.09837	Usp22
-0.3712	4.268	0.3689	Swi5
-0.3711	4.198	0.3932	Glce
-0.3711	3.732	0.5506	Pank4
-0.3709	6.3	0.1116	Ckb
-0.3706	7.665	0.03768	Hnrnpk
-0.3706	3.189	0.5091	Gpaa1
-0.3704	7.561	0.09839	Gspt1
-0.3699	5.748	0.1863	Tal1
-0.3694	4.287	0.3422	Atpif1
-0.3694	3.323	0.4866	Zc3h10
-0.3693	4.482	0.381	Card6
-0.3692	5.525	0.1887	Mid1ip1
-0.369	7.587	0.06236	Hnrnpc
-0.369	5.829	0.1434	Clptm1
-0.369	4.168	0.4069	Cdk5rap3
-0.3687	5.184	0.302	Gde1
-0.3686	5.905	0.133	Ssr3
-0.3686	3.672	0.4616	B4galnt1
-0.3678	3.391	0.4453	Sf3b4
-0.3677	3.96	0.3559	Tmc6
-0.3676	6.587	0.1127	Evi2a
-0.3672	3.65	0.523	Impdh2
-0.3671	5.212	0.4477	Zfp518a
-0.3671	3.558	0.5057	Asl
-0.3668	4.637	0.4392	Zscan29
-0.3667	6.112	0.1166	Tmem64
-0.3666	7.695	0.04922	Fscn1
-0.3666	4.126	0.3991	Mynn
-0.3662	5.801	0.1517	Uba1
-0.3662	5.811	0.2695	9130015G15Rik
-0.3656	4.99	0.2687	Septin8
-0.3656	3.793	0.4507	Zfp595
-0.3654	3.079	0.5928	Dpcd
-0.3652	4.083	0.3803	Cox6a1
-0.365	5.01	0.1945	Spint1
-0.3649	8.864	0.03426	Fam102b
-0.3649	3.751	0.6075	Ngdn
-0.3647	4.018	0.5167	Htatsf1
-0.3646	4.352	0.6754	Sh3rf1
-0.364	6.177	0.07891	Rad21
-0.3639	4.927	0.231	Amd1
-0.3639	6.956	0.3832	Setbp1
-0.3638	4.006	0.3242	Nup54
-0.3635	6.504	0.09029	Cpne3
-0.3633	3.136	0.5699	Gm12474
-0.363	5.566	0.2007	Cct6a
-0.3628	6.011	0.1783	Naca
-0.362	5.63	0.1037	Tsg101
-0.362	4.451	0.3586	Rps10
-0.3619	3.465	0.4973	Cib1
-0.3618	6.65	0.103	Sting1
-0.3618	3.135	0.7359	Hirip3
-0.3612	4.439	0.3633	Cetn3
-0.3611	3.492	0.4643	Tmem263
-0.361	5.161	0.3052	Rps13
-0.3607	3.786	0.4024	Rpl15
-0.3606	4.973	0.3194	Sema4c
-0.3606	3.539	0.7434	Gm55604
-0.3605	4.222	0.5584	1700109H08Rik
-0.3603	4.823	0.5273	Got1
-0.3597	6.232	0.09115	Hadha
-0.3597	6.572	0.374	Fam107b
-0.3594	3.067	0.6059	Dab2ip
-0.359	6.494	0.2648	Arrdc3
-0.3589	8.175	0.01739	Hnrnpu
-0.3589	4.731	0.4479	Rps20
-0.3588	6.699	0.2307	Tagap
-0.3587	5.039	0.2544	Hnrnpa0
-0.3585	4.236	0.3806	2610020C07Rik
-0.3585	4.229	0.4242	Fkbp2
-0.3581	3.998	0.4045	Tfip11
-0.358	4.98	0.2823	Zc3h6
-0.3579	6.562	0.08548	Ociad1
-0.3577	4.481	0.3127	Poglut3
-0.3576	7	0.0461	Tmed10
-0.3575	4.275	0.3224	Atxn7l3
-0.3572	4.639	0.2973	Inip
-0.3571	3.726	0.553	Ndufb1
-0.3569	3.079	0.6075	Mrpl43
-0.3567	5.497	0.2331	Idh2
-0.3556	9.733	0.03984	Klf12
-0.3556	8.085	0.1686	Lrrc8d
-0.3555	4.833	0.2415	Prxl2c
-0.3554	7.421	0.08043	Ifnar2
-0.3553	5.32	0.169	Dusp7
-0.3553	2.964	0.7573	Htra3
-0.3551	4.964	0.3123	Rps19
-0.3549	4.164	0.4319	Ntmt1
-0.3549	3.905	0.5017	Cops6
-0.3541	3.26	0.5433	Prps1l3
-0.354	5.675	0.3606	Lonrf3
-0.3539	3.442	0.5225	Ech1
-0.3538	5.535	0.2861	Tmed9
-0.3537	5.499	0.2728	Endod1
-0.3536	7.411	0.03713	Gnb1
-0.3536	5.439	0.4151	Rps12
-0.3532	3.684	0.4299	Commd6
-0.3531	3.938	0.4588	Fut11
-0.3529	6.242	0.07716	Arpc4
-0.3528	3.918	0.5057	Zfp719
-0.3527	3.042	0.5307	Nudt16
-0.3524	4.269	0.3661	Alg5
-0.3522	3.071	0.6083	AI467606
-0.3521	5.665	0.1881	Slc26a2
-0.3521	5.525	0.1903	Eif2s2
-0.3518	5.895	0.1441	Snx20
-0.3517	6.736	0.1516	Ybx1
-0.3514	5.405	0.1742	9530068E07Rik
-0.3513	2.878	0.5365	Arfip2
-0.3512	4.91	0.2725	Rnf139
-0.3511	4.335	0.5081	Rpl35
-0.3507	3.131	0.6281	Tbl3
-0.3505	4.214	0.7607	Sema4b
-0.3504	5.151	0.3525	Sfr1
-0.3504	3.387	0.6053	Sparcl1
-0.3501	3.052	0.5584	Ndufa2
-0.35	4.636	0.5533	Hspe1
-0.3497	6.043	0.532	Egr1
-0.3494	3.793	0.4313	Wdr61
-0.3493	6.168	0.1887	Flnb
-0.3492	4.886	0.3006	Tubgcp3
-0.349	4.21	0.6014	Zmiz1os1
-0.3489	4.694	0.354	Ptgr2
-0.3489	2.859	0.6038	Coasy
-0.3487	8.891	0.07255	Lims1
-0.3484	3.187	0.5605	Gm14455
-0.3483	5.041	0.2885	Gmps
-0.3482	5.601	0.1941	Pcmt1
-0.3482	6.134	0.2861	Rpl18a
-0.3481	3.037	0.5656	Zfp628
-0.348	5.044	0.2899	Psmb1
-0.3479	5.799	0.1266	Nono
-0.3478	3.618	0.463	Cyc1
-0.3477	4.999	0.2726	Chmp1b
-0.3477	4.219	0.3659	Tor4a
-0.3475	5.979	0.2557	Rps23
-0.3466	6.566	0.2015	Vasp
-0.3465	4.376	0.5146	Slc16a1
-0.3465	3.833	0.5817	Oxsm
-0.3464	5.29	0.3006	Asb2
-0.3464	4.731	0.4062	Junos
-0.3462	6.945	0.08783	Arhgap4
-0.3462	5.498	0.1725	Ugp2
-0.3461	4.028	0.4937	Tgif2
-0.3461	3.102	0.5904	Tada2b
-0.3459	4.154	0.5583	Haao
-0.3458	4.358	0.4202	Zfp275
-0.3457	4.813	0.302	Myl6
-0.3457	4.652	0.3665	Eif4a3
-0.3457	3.669	0.5365	Dctn3
-0.3455	3.431	0.5208	Rwdd4a
-0.3452	3.348	0.5036	Hdac3
-0.3448	5.186	0.288	Parp11
-0.3447	5.176	0.2674	Selenos
-0.3447	3.303	0.5278	Wdr6
-0.3441	7.934	0.08518	Rasal2
-0.3441	5.455	0.1969	Gabarap
-0.344	3.784	0.4686	Degs1
-0.3439	5.678	0.1557	Sash3
-0.3436	4.09	0.4336	Pdcl
-0.3435	9.357	0.02802	Cyfip1
-0.3432	3.397	0.5473	Plrg1
-0.343	3.29	0.5597	Exosc9
-0.3423	7.778	0.03059	Dtx4
-0.3423	5.104	0.2496	Cct7
-0.3422	4.379	0.4187	Psmc5
-0.3418	4.21	0.3847	Gng5
-0.3416	3.911	0.4233	Tesk1
-0.3415	6.732	0.1445	Kpna3
-0.3415	7.21	0.6365	Rnf19b
-0.3412	3.284	0.6409	Tnfsf8
-0.3409	4.548	0.315	Smim15
-0.3407	4.13	0.4045	4833411C07Rik
-0.3405	6.471	0.1435	Dnajc3
-0.3405	4.451	0.3666	Fam50a
-0.34	4.498	0.5365	Rpl28
-0.3398	5.016	0.4194	Rps26
-0.3397	6.231	0.1488	Atp5a1
-0.3396	3.841	0.4218	Rab33b
-0.3396	3.87	0.4754	4931422A03Rik
-0.3393	3.972	0.4704	Gm16599
-0.339	3.984	0.5219	Adrm1
-0.3388	4.612	0.3151	Hspa13
-0.3387	7.4	0.06783	Camk1
-0.3387	4.824	0.3229	Fkbp4
-0.3387	4.69	0.5616	H2-Ob
-0.3386	6.503	0.08722	Clstn1
-0.3385	4.447	0.3837	Col25a1
-0.3378	5.25	0.2905	Rpl22
-0.3376	3.998	0.5878	Vxn
-0.3376	3.103	0.5956	Rdh14
-0.3374	5.735	0.1706	Nfe2l1
-0.3372	7.754	0.03421	Daglb
-0.3372	3.904	0.4286	Cox5a
-0.3372	3.557	0.5396	Mettl21a
-0.3371	7.492	0.2343	Rel
-0.3371	3.15	0.7262	Asap2
-0.3369	5.388	0.3337	5031425E22Rik
-0.3368	3.551	0.4892	D730003I15Rik
-0.3367	6.778	0.1251	Tram1
-0.3366	7.116	0.09413	Ttyh3
-0.3366	5.257	0.2358	Slc25a12
-0.3365	4.746	0.3268	Gm21988
-0.3363	3.079	0.5784	Btbd19
-0.3362	4.755	0.5493	Ccl9
-0.336	3.684	0.4619	Cdc14b
-0.3358	2.965	0.5982	Ubxn8
-0.3354	2.939	0.6068	H2-Ke6
-0.3354	5.677	0.6934	Zswim4
-0.3352	3.666	0.4497	Tdp2
-0.335	6.023	0.4686	Jam2
-0.335	4.106	0.4928	Psmd13
-0.335	2.835	0.6432	D17H6S53E
-0.3349	5.668	0.1634	Ppp2r5a
-0.3346	3.159	0.494	Gemin7
-0.3345	5.714	0.2367	Naa50
-0.3341	8.858	0.5773	Olfml3
-0.334	5.602	0.2879	Manf
-0.3338	3.98	0.4297	Ubl5
-0.3332	3.191	0.5514	Atl1
-0.3331	3.825	0.5122	Bak1
-0.3327	3.487	0.5014	Phospho2
-0.3325	4.961	0.4419	Prkcsh
-0.3324	4.891	0.3735	Taldo1
-0.3323	8.703	0.02915	Man1a
-0.3315	4.665	0.3666	Pdlim4
-0.3315	3.45	0.5796	Psmb10
-0.3314	8.251	0.2256	Trf
-0.3314	3.67	0.5624	Lig3
-0.3314	3.96	0.6856	Il1rl1
-0.3311	4.384	0.8552	Il1b
-0.3309	3.025	0.5961	Med10
-0.3308	6.56	0.1379	Stau2
-0.3304	3.317	0.5503	1700126G02Rik
-0.3303	4.279	0.3392	Cltb
-0.3303	3.785	0.5167	Poldip2
-0.3302	3.36	0.545	4833418N02Rik
-0.3301	3.158	0.6289	Tmem185a
-0.3301	4.65	0.6466	5033421B08Rik
-0.33	3.684	0.545	Aldh4a1
-0.3299	4.935	0.3226	Adprh
-0.3293	3.997	0.4288	Opa3
-0.3289	4.563	0.4392	Cnih4
-0.3287	5.087	0.3191	Ppp5c
-0.3286	4.889	0.3066	Snrpb
-0.3286	5.535	0.4809	Gem
-0.3285	9.648	0.01192	Ddx5
-0.3282	5.041	0.2178	Dnttip2
-0.3281	4.791	0.2805	Anp32b
-0.3279	5.506	0.1824	Dnaja2
-0.3278	3.895	0.4614	Kin
-0.3277	3.161	0.5824	Tomm22
-0.3275	5.262	0.3218	Cs
-0.3274	5.84	0.1899	Dlst
-0.3274	6.409	0.3568	Slc25a25
-0.3272	7.467	0.06461	Mlec
-0.3272	5.957	0.2286	Npm1
-0.3271	5.336	0.1796	Washc5
-0.3268	4.404	0.4288	Tsen2
-0.3266	4.686	0.4374	ENSMUSG00000121007
-0.3259	5.95	0.1861	Syngr2
-0.3256	8.927	0.02559	Cltc
-0.3255	3.606	0.5181	C1qbp
-0.3254	7.775	0.05814	Adgrg1
-0.3254	5.468	0.1655	Tbc1d15
-0.3254	3.157	0.5186	Relt
-0.3253	5.876	0.2358	Srpr
-0.3253	3.205	0.6341	Prkaa2
-0.3251	3.937	0.4372	Osgin2
-0.3248	8.323	0.1473	Lamp1
-0.324	4.621	0.3511	Trim27
-0.3238	9.171	0.03693	Rtn1
-0.3237	4.71	0.4754	Eef1d
-0.3236	5.14	0.2737	Bmi1
-0.3235	9.835	0.05538	Psap
-0.3233	8.516	0.03421	Abi3
-0.323	3.494	0.5314	Tmem106a
-0.3228	4.612	0.4297	5830432E09Rik
-0.3228	5.139	0.4419	Mob3c
-0.3226	3.407	0.5057	Hdac6
-0.3224	3.092	0.6408	Gm44577
-0.3223	4.918	0.3422	Zmat2
-0.322	5.768	0.308	Gm21970
-0.3219	2.835	0.6667	Cryba4
-0.3217	5.924	0.1402	Kat7
-0.3215	3.07	0.6409	Zbtb8os
-0.3215	2.978	0.666	Lyplal1
-0.3214	4.888	0.3871	Vamp3
-0.3213	5.179	0.6256	Lst1
-0.3211	6.647	0.09547	Tgoln1
-0.3209	4.84	0.4336	Gm55122
-0.3206	6.722	0.2447	Vmp1
-0.3204	4.008	0.3914	Pak4
-0.3203	6.648	0.1434	Snx2
-0.3203	4.606	0.4947	Ptk2
-0.3201	5.274	0.2755	Mybbp1a
-0.32	7.852	0.08256	Npc2
-0.3197	4.992	0.5583	Ints10
-0.3193	5.165	0.302	Dnajc2
-0.3192	7.036	0.09507	Arpc1b
-0.319	7.363	0.09182	Sncaip
-0.3187	7.423	0.5217	ENSMUSG00000120580
-0.3185	5.462	0.2589	Hacd3
-0.3181	4.357	0.4098	2510039O18Rik
-0.3175	3.46	0.5396	Nudt16l1
-0.3174	4.517	0.4431	Anxa4
-0.3171	2.988	0.6468	Svbp
-0.3169	3.906	0.5057	Dipk2a
-0.3166	5.286	0.249	Fundc1
-0.3166	5.798	0.2867	Txndc11
-0.3165	4.944	0.2873	Pomp
-0.3162	3.733	0.532	Faim
-0.3161	5.716	0.2463	Coro1b
-0.316	6.734	0.1233	Tlr4
-0.316	7.818	0.1467	Clip1
-0.3159	4.778	0.3127	Chd3
-0.3155	5.687	0.6247	Mtmr10
-0.3154	5.39	0.3697	Gaa
-0.3152	5.966	0.2639	Rpl10
-0.3152	4.661	0.3565	Iscu
-0.3152	4.508	0.4355	Ubqln2
-0.3152	4.02	0.6085	Ccdc59
-0.3145	8.355	0.5057	Ptpro
-0.3144	4.845	0.5289	Plekhh2
-0.3142	2.92	0.6195	Rpl36al
-0.3141	4.493	0.4262	Snrpa
-0.3139	3.496	0.4928	Cables2
-0.3136	3.572	0.4757	Gtpbp10
-0.3136	3.06	0.6316	Pih1d1
-0.3134	5.75	0.219	Snx17
-0.3132	3.239	0.6447	Cyren
-0.3131	5.191	0.4479	Slc2a1
-0.3129	5.912	0.2406	Trir
-0.3127	3.377	0.5732	Fdxr
-0.3125	6.397	0.1434	Clic1
-0.3124	6.065	0.2709	Klc1
-0.3122	6.081	0.3045	Mfsd1
-0.3121	8.201	0.1504	Ddx3x
-0.3121	3.079	0.5884	Gtf3a
-0.312	5.7	0.2667	Bnip3l
-0.3118	3.108	0.5678	Zfp58
-0.3116	3.61	0.5811	Ddx19b
-0.3115	7.405	0.1162	Ppt1
-0.3106	3.762	0.6462	Gm41611
-0.3104	4.948	0.3516	Calm3
-0.3102	3.639	0.5057	Zbtb25
-0.3101	5.999	0.1435	Plod3
-0.31	4.077	0.4636	3110056K07Rik
-0.31	3.567	0.5633	Acad11
-0.3099	3.68	0.5567	Fhip2b
-0.3093	5.017	0.3692	Zbtb7b
-0.3093	4.296	0.42	Rpap2
-0.3093	5.691	0.701	Casp4
-0.3092	5.776	0.3176	Lap3
-0.3092	5.345	0.3633	Cct2
-0.3092	3.9	0.6289	Cep20
-0.3092	3.386	0.6519	H2ac25
-0.3087	5.282	0.2343	Ppm1g
-0.3085	4.194	0.4657	Thoc5
-0.3084	5.591	0.1969	Mrfap1
-0.3081	6.492	0.1116	Rdx
-0.308	8.891	0.09327	Myh9
-0.3077	3.072	0.5727	Zdhhc24
-0.3076	3.054	0.626	Trappc1
-0.3073	5.304	0.3091	Rab18
-0.3071	5.476	0.2709	Ilf3
-0.3069	3.163	0.6054	Zfp111
-0.3068	5.864	0.2171	Snx3
-0.3067	6.376	0.2263	Atp5b
-0.3066	6.557	0.1296	Eif4h
-0.3066	3.597	0.6964	Gramd3
-0.3063	7.662	0.07891	Spata13
-0.3061	3.979	0.5191	Ilf2
-0.3061	3.744	0.547	Zbtb33
-0.306	7.101	0.2124	Arhgef40
-0.306	3.544	0.559	Pef1
-0.3059	6.964	0.2885	Sowahc
-0.3057	6.63	0.2235	Tapbp
-0.3057	3.09	0.5966	Ccdc34
-0.3056	4.556	0.4286	Aggf1
-0.3055	6.27	0.1861	Serp1
-0.3051	6.068	0.284	Sptan1
-0.3049	7.68	0.1726	Sat1
-0.3049	2.706	0.7134	Klf11
-0.3048	5.251	0.3157	Glod4
-0.3041	6.094	0.3127	Rpn2
-0.3041	6.066	0.3134	Zcchc24
-0.3041	4.285	0.3762	Pqbp1
-0.3039	6.075	0.3154	B3gnt2
-0.3037	6.294	0.2059	Ccng2
-0.3035	3.075	0.8658	Gm12166
-0.3033	2.905	0.6438	Mrpl16
-0.3033	3.437	0.6587	Prdx3
-0.3032	5.458	0.4548	Nrbf2
-0.3031	4.265	0.4678	Cyth2
-0.3031	3.165	0.5466	Nelfe
-0.303	5.196	0.3195	Wbp11
-0.3025	6.949	0.09257	Atp6ap2
-0.3023	5.55	0.2875	Pggt1b
-0.3019	3.317	0.6133	Agbl3
-0.3018	6.37	0.3673	Zeb2os
-0.3018	4.119	0.498	Ing1
-0.3013	3.25	0.6018	Ciao3
-0.3012	4.611	0.3991	Cbx3
-0.3008	6.473	0.1941	Map7d1
-0.3008	3.883	0.4671	Ppa2
-0.3008	4.283	0.5273	Rps28
-0.3005	4.771	0.3853	Phf23
-0.3004	3.087	0.6365	Mrpl9
-0.3002	3.81	0.5372	Me2
-0.3002	3.444	0.6149	Ptcd2
-0.2992	5.011	0.2612	Dag1
-0.2991	6.313	0.1173	Mfap3
-0.299	4.072	0.5467	Cdipt
-0.2989	3.28	0.61	Pigp
-0.2986	4.826	0.4336	Trim47
-0.2984	3.684	0.5801	Plin2
-0.2981	4.651	0.4297	Minpp1
-0.2981	3.526	0.6189	Eif3k
-0.298	4.336	0.4595	Txndc15
-0.2978	4.059	0.5414	Ak1
-0.2977	8.293	0.2425	Slc15a3
-0.2977	4.009	0.4927	Nsmce4a
-0.2975	3.24	0.7013	Gm9484
-0.2967	5.126	0.3554	Gnl2
-0.2965	7.272	0.1858	Stambpl1
-0.2965	5.308	0.3026	Snap29
-0.2965	4.772	0.3148	Cfap20
-0.2964	6.042	0.421	Rpl23
-0.2962	3.259	0.6179	Sra1
-0.2961	4.459	0.5039	Rpe
-0.2959	3.721	0.6244	Ost4
-0.2957	6.809	0.1884	Cyba
-0.2955	3.316	0.622	Stat5a
-0.2951	4.484	0.4299	Nkap
-0.2951	4.045	0.4986	Gm48678
-0.295	4.863	0.3665	Srp68
-0.2946	5.748	0.2634	Hspd1
-0.2944	4.753	0.4085	Yipf5
-0.2942	9.13	0.1336	Cd81
-0.2938	5.278	0.4413	Rpl41
-0.2938	3.647	0.5655	Gk
-0.2935	4.268	0.4917	Nol11
-0.2934	4.302	0.4446	Drap1
-0.2934	3.838	0.5899	Ptov1
-0.2933	7.047	0.08832	Hnrnpl
-0.2932	8.005	0.09963	Ubl3
-0.2932	6.584	0.1443	Ppp2ca
-0.2931	4.077	0.5462	Gnl3l
-0.293	5.147	0.3441	Grap
-0.2928	5.767	0.2859	Rab35
-0.2928	3.21	0.6127	Dalrd3
-0.2923	3.892	0.5737	Srp14
-0.292	6.39	0.1892	Ssr1
-0.2919	3.334	0.6074	Ap1s1
-0.2918	6.332	0.1702	Hnrnpdl
-0.2916	4.681	0.3436	Eri1
-0.2913	4.511	0.6611	Tpm4
-0.291	7.769	0.09606	Dpysl2
-0.291	4.349	0.5089	Zfp729b
-0.2908	4.965	0.3471	Ppp2r1a
-0.2908	4.035	0.6468	Layn
-0.2904	3.281	0.6303	Plxna4os1
-0.2901	8.367	0.05217	Rap1b
-0.2901	6.484	0.2014	Arhgdib
-0.2901	4.371	0.4187	Prdx5
-0.2901	4.348	0.5307	Zkscan17
-0.29	6.234	0.2282	Erf
-0.2899	3.15	0.6085	Ing2
-0.2898	4.773	0.3804	Bend6
-0.2893	3.679	0.5586	Gm15283
-0.2892	8.458	0.03694	Adam10
-0.2892	3.752	0.5962	Nipa1
-0.289	7.287	0.1461	Eif4a1
-0.289	4.03	0.5056	Phax
-0.2888	5.547	0.3081	Cdc37
-0.2887	5.528	0.3219	Serf2
-0.288	8.188	0.1083	Snx13
-0.288	4.375	0.4928	Sf3a3
-0.2879	8.092	0.1844	Ehd4
-0.2878	3.361	0.561	4930453N24Rik
-0.2876	5.502	0.2973	Maco1
-0.2876	5.28	0.5167	Rps7
-0.2872	3.956	0.5377	ENSMUSG00000120693
-0.2871	7.648	0.08651	Rab3il1
-0.2871	5.884	0.3216	Ercc5
-0.287	7.103	0.155	St13
-0.287	4.246	0.5597	Chmp2b
-0.2868	5.677	0.354	Fuca2
-0.2867	6.302	0.1823	Ppp1r18
-0.2864	9.247	0.5359	Gpr34
-0.2863	4.043	0.5357	BC024978
-0.2861	4.834	0.4548	Ublcp1
-0.2856	5.093	0.3928	Usp14
-0.2855	2.958	0.6819	Get4
-0.2851	3.829	0.598	Gstz1
-0.285	6.161	0.2706	Vcp
-0.2849	7.365	0.09632	Rab1a
-0.2848	4.971	0.4704	Eif2s1
-0.2846	5.044	0.3346	Mboat7
-0.2846	3.476	0.7333	Gpr180
-0.2845	4.329	0.5027	Pabpc4
-0.2843	5.853	0.2743	Macir
-0.2842	5.309	0.3538	Zfp266
-0.2841	7.007	0.4642	Arf4
-0.2835	4.143	0.4901	Nmi
-0.2833	8.535	0.06577	Pros1
-0.2831	4.088	0.5692	Stradb
-0.283	4.198	0.4918	Nelfb
-0.2824	6.653	0.1696	M6pr
-0.2821	3.689	0.5807	Gnptg
-0.2821	3.105	0.6224	Ccdc124
-0.2819	4.474	0.5246	Tuba1c
-0.2815	6.565	0.2171	Lmbrd1
-0.2812	6.203	0.3554	Tgif1
-0.2809	8.029	0.1404	Itgav
-0.2809	3.025	0.7177	Gdpd5
-0.2808	4.511	0.7841	H2bc4
-0.2805	6.345	0.317	Zbtb18
-0.2805	8.934	0.5967	Kcnma1
-0.2804	5.335	0.3187	Atp6v1d
-0.2804	4.314	0.5634	Susd1
-0.2803	4.258	0.4409	Slc36a4
-0.2803	3.624	0.5992	Ndufs3
-0.2802	8.611	0.1116	Smad3
-0.28	3.154	0.7183	Rhot2
-0.2794	5.629	0.2761	Ptges3
-0.2793	3.737	0.5801	ENSMUSG00000121168
-0.279	4.427	0.5281	Wsb2
-0.2789	5.777	0.2454	Cdc27
-0.2788	4.682	0.4888	Ak2
-0.2785	5.134	0.3298	Akr1b10
-0.2776	5.842	0.308	Surf4
-0.2774	3.383	0.6594	Txndc17
-0.2773	6.705	0.1861	Lasp1
-0.2773	5.46	0.476	Ywhaq
-0.2773	3.607	0.5466	Qdpr
-0.2771	5.873	0.3565	Mknk2
-0.2767	4.901	0.4099	Impa1
-0.2767	6.333	0.5616	Rbpms
-0.2766	6.434	0.211	Arpc5
-0.2766	4.019	0.5928	Ciao2a
-0.2765	6.383	0.3006	A330023F24Rik
-0.2764	7.247	0.3715	2510009E07Rik
-0.2761	5.016	0.6497	Bag3
-0.2759	5.046	0.4143	Syf2
-0.2758	4.473	0.4927	Gpkow
-0.2758	3.84	0.5462	Lamtor4
-0.2758	3.405	0.6702	Nrm
-0.2752	5.998	0.3154	Hsd17b12
-0.275	5.657	0.4642	Notch1
-0.2748	3.319	0.5904	Fam151b
-0.2746	6.182	0.2268	Calu
-0.2745	3.537	0.6078	Mrpl15
-0.2744	4.1	0.5017	Ubxn1
-0.2743	4.302	0.4614	Ticam2
-0.2742	5.591	0.2872	Nras
-0.2741	4.613	0.4904	Sav1
-0.274	7.91	0.09436	Tm9sf3
-0.2736	3.839	0.5268	Ccdc90b
-0.2735	8.422	0.05915	Actr2
-0.2735	7.181	0.304	Fry
-0.2734	6.362	0.2629	Trim8
-0.2732	5.181	0.5305	Gm32036
-0.2726	5.606	0.3164	Rab21
-0.2725	5.399	0.42	Zmat1
-0.2724	5.601	0.498	Rps29
-0.2722	7.484	0.08548	P2rx7
-0.2721	5.115	0.3743	Por
-0.2721	4.648	0.4579	Sp2
-0.2715	3.04	0.7341	Smim35
-0.2714	3.544	0.6028	Pin1
-0.2713	7.337	0.2207	Pmp22
-0.2712	4.315	0.489	Fbl
-0.2712	4.55	0.5486	Usp5
-0.2712	3.685	0.6422	Msantd4
-0.2711	6.631	0.3261	Gm2a
-0.2708	5.213	0.3511	Aup1
-0.2706	9.518	0.09839	Itgam
-0.2703	7.702	0.1473	Dync1h1
-0.2703	4.732	0.471	Rars
-0.2703	5.621	0.4788	Rps14
-0.2701	5.288	0.409	Ipo8
-0.2701	3.524	0.5905	Cc2d1a
-0.2698	4.751	0.4686	Sri
-0.2697	4.926	0.441	Ube2q1
-0.2695	6.178	0.2108	Supt6
-0.2694	9.185	0.1911	Retreg1
-0.2693	7.073	0.2393	Anp32a
-0.2693	5.87	0.362	Pttg1ip
-0.2693	4.279	0.4595	Vash1
-0.2693	4.178	0.5167	Tg
-0.2693	4.337	0.5241	Vdac3
-0.2691	8.534	0.286	Rnf180
-0.2691	4.057	0.5493	Nfkbil1
-0.2688	7.205	0.1471	Tln2
-0.2685	5.171	0.767	Jpx
-0.2683	4.39	0.5056	Srek1ip1
-0.2682	7.446	0.2268	Bach1
-0.2679	4.361	0.5929	Ifi27
-0.2678	3.535	0.6611	Spryd7
-0.2675	2.99	0.8357	Arhgef9
-0.2674	4.423	0.448	Polr1d
-0.2674	3.714	0.5771	Chst12
-0.2673	8.202	0.1148	Fcgr3
-0.2673	5.444	0.2713	Rbbp7
-0.2673	3.358	0.6466	2310022A10Rik
-0.2673	3.661	0.6597	Pex5
-0.2672	2.982	0.666	Inhca
-0.267	5.133	0.4657	Jpt1
-0.267	5.642	0.5586	Mafk
-0.2669	3.234	0.7044	Adsl
-0.2667	4.481	0.4905	Nol7
-0.2667	4.224	0.6121	Apool
-0.2666	5.445	0.6888	B4galt4
-0.2665	5.291	0.3616	Yeats2
-0.2659	6.644	0.3331	Rps9
-0.2659	4.198	0.4908	Aga
-0.2658	5.146	0.4288	Oaz1
-0.2657	6.733	0.1652	Ywhag
-0.2657	3.032	0.634	Bcl7c
-0.2652	4.133	0.5268	Dusp27
-0.2651	4.871	0.4045	Shc1
-0.265	4.052	0.5959	Acadvl
-0.2648	8.283	0.06642	Lnpep
-0.2648	8.186	0.08009	Snx5
-0.2647	3.359	0.6956	Commd9
-0.2647	2.789	0.7758	Jag2
-0.2646	3.648	0.5878	Fkrp
-0.2643	4.74	0.4058	Plbd2
-0.2643	3.213	0.6335	Atg101
-0.2642	4.523	0.4463	Fam174a
-0.2639	2.914	0.6815	Zfp408
-0.2636	5.994	0.4283	Dusp3
-0.2635	3.153	0.7175	Rrp8
-0.2632	3.208	0.7019	Dclre1b
-0.2627	5.028	0.4074	Psmc2
-0.2627	4.61	0.4803	Slc35b2
-0.2627	2.862	0.7881	Gm3002
-0.2626	4.673	0.6702	Irs2
-0.2624	4.242	0.489	Bcas2
-0.2623	6.481	0.2737	Tmem50a
-0.262	3.544	0.6946	Gm48066
-0.2619	2.953	0.6613	4930522L14Rik
-0.2615	5.281	0.316	Ift172
-0.2614	4.534	0.5377	Zfp84
-0.261	4.475	0.6874	Slc25a33
-0.2608	4.619	0.5426	1810030O07Rik
-0.2607	3.459	0.6197	Usp39
-0.2606	6.864	0.1522	Gusb
-0.2606	4.428	0.4448	Pccb
-0.2606	4.297	0.5273	Srprb
-0.2606	3.838	0.5817	Hmces
-0.2604	4.516	0.5588	Fnta
-0.2599	5.973	0.3965	Nubpl
-0.2599	3.707	0.6715	Gng7
-0.2598	10.19	0.09182	Serinc3
-0.2598	4.402	0.4974	R3hdm4
-0.2597	4.672	0.4809	Tcf3
-0.2597	4.919	0.5287	Rps17
-0.2597	4.252	0.5423	Fzr1
-0.2596	4.283	0.5616	Fis1
-0.2595	4.573	0.6849	Egr2
-0.2594	3.063	0.6827	Rrad
-0.2588	6.3	0.2564	Rbbp4
-0.2588	4.527	0.4931	Zkscan8
-0.2587	5.817	0.308	Zbtb1
-0.2587	4.761	0.4972	Anapc4
-0.2586	8.076	0.07313	Arpc2
-0.2583	5.699	0.4288	Gfpt1
-0.2583	4.367	0.553	Unc5c
-0.2583	3.617	0.5966	Ugt1a7c
-0.258	5.484	0.3471	Atxn7l3b
-0.258	4.131	0.5467	Brat1
-0.2578	4.185	0.6083	Cebpzos
-0.2575	5.642	0.4663	Rps24
-0.2575	5.36	0.4675	Trappc14
-0.257	8.351	0.1779	Il6st
-0.2568	4.488	0.5695	Homer1
-0.2567	5.801	0.2425	Mta3
-0.2566	3.389	0.6552	Hadh
-0.2564	4.034	0.5191	Cd151
-0.2564	3.653	0.6083	Rab9
-0.2563	6.362	0.2931	Bzw1
-0.2562	6.583	0.2671	Lysmd4
-0.256	6.823	0.27	Padi2
-0.256	6.742	0.3197	Tra2b
-0.2559	3.676	0.6946	Psma5
-0.2559	4.972	0.741	H2-DMa
-0.2558	6.873	0.308	Kpnb1
-0.2558	4.641	0.4692	Gpr157
-0.2552	4.286	0.4927	Fkbp3
-0.2551	7.063	0.172	Pxn
-0.255	7.417	0.118	Fcer1g
-0.2549	4.042	0.5342	Cryzl2
-0.2548	8.87	0.07279	Rgs10
-0.2547	4.638	0.5407	Arhgap9
-0.2546	2.88	0.7497	Bnip1
-0.2545	6.782	0.189	Vapa
-0.2542	3.3	0.6984	Gm37229
-0.2541	3.987	0.6085	Snrpd3
-0.254	3.703	0.6819	A630072M18Rik
-0.2538	3.961	0.5737	Rnf215
-0.2538	3.999	0.6337	Adpgk
-0.2537	5.332	0.3538	Tapt1
-0.2536	8.014	0.1696	Edem1
-0.2534	4.991	0.4928	Plekhb2
-0.2531	4.934	0.4196	Gars
-0.253	8.392	0.1015	Sh3glb1
-0.2529	6.761	0.2343	Rassf5
-0.2527	4.113	0.6074	Cnih1
-0.2526	10.12	0.06548	Laptm5
-0.2526	7.179	0.143	Csde1
-0.2526	7.129	0.3977	Tent5c
-0.2524	4.797	0.4579	Actr1b
-0.2523	7.802	0.1435	Sort1
-0.2523	5.161	0.381	Brpf1
-0.2522	3.638	0.6057	Gm37376
-0.2519	4.788	0.413	Sec23a
-0.2512	4.392	0.5584	Fam220a - ENSMUSG00000083012
-0.2511	7.601	0.2098	Stat3
-0.251	6.044	0.2684	Wdr81
-0.2509	4.724	0.4499	Snapc1
-0.2508	5.311	0.4779	Tor3a
-0.2508	4.353	0.5407	Ints1
-0.2506	7.761	0.2866	Itpkb
-0.2504	3.216	0.7519	Wdr89
-0.2503	6.604	0.4103	Brd2
-0.25	4.424	0.5851	Cd276
-0.25	3.187	0.7019	Tnik
-0.2499	5.925	0.3066	Hspa9
-0.2498	7.892	0.1403	Trem2
-0.2498	4.413	0.5771	Ahsa1
-0.2495	4.856	0.4956	Fcgrt
-0.249	5.451	0.4082	Pex7
-0.2489	4.298	0.5057	Pfdn2
-0.2488	5.877	0.2539	Ube2l3
-0.2488	7.057	0.3072	Lrrc3
-0.2488	4.762	0.46	Slc39a8
-0.2488	4.352	0.5982	Mak16
-0.2488	2.978	0.7284	Irf4
-0.2487	8.018	0.127	Asah1
-0.2486	4.199	0.5624	Chpt1
-0.2484	6.73	0.2176	Atxn10
-0.2484	5.337	0.3648	Erlin2
-0.2484	3.652	0.7084	Tbl2
-0.2482	3.757	0.5597	Orai3
-0.248	4.639	0.4906	Cntln
-0.2479	4.974	0.6349	Srgap3
-0.2476	6.394	0.3169	Nucb1
-0.2476	6.121	0.5289	Cmya5
-0.2473	5.274	0.3793	Sar1a
-0.2473	6.306	0.4288	Znfx1
-0.2471	5.348	0.4174	Aamp
-0.2471	3.55	0.624	Tmem242
-0.247	3.002	0.7486	Lhpp
-0.2469	3.704	0.589	Ppp2r3d
-0.2468	6.566	0.2268	Ago1
-0.2468	4.586	0.5138	Dlg3
-0.2465	5.459	0.3422	Srsf9
-0.2463	6.679	0.4072	Hif1a
-0.2462	6.11	0.3439	Pdk1
-0.2461	5.577	0.3247	Ano10
-0.2461	3.852	0.663	Prmt2
-0.2459	3.537	0.6474	Pigx
-0.2458	3.574	0.6849	Rrm1
-0.2457	4.068	0.5489	Zfp330
-0.2457	6.06	0.6377	Tdrd3
-0.2456	3.565	0.6409	Dnaaf10
-0.2455	6.101	0.271	Mafg
-0.2455	3.137	0.7285	Srm
-0.2453	8.618	0.106	Cd53
-0.2453	4.027	0.5894	Pfas
-0.2452	5.267	0.3502	Map1lc3b
-0.2451	4.359	0.5476	Git1
[truncated: 55,011 more rows]

## Sheet: DE-DAM
logFC	AveExpr	p_val_adj	gene_names
-5.838	1.156	0.006162	4930519F16Rik
-5.653	1.224	8.095e-07	Actr3-ps
-5.321	1.169	0.0002103	Adgrg5
-4.904	2.361	9.828e-07	Cd36
-4.046	4.201	0.01042	Gm47283
-3.656	6.23	1.049e-06	Nrxn1
-3.141	5.442	0.009423	Cd300lf
-2.9	1.747	0.001937	Pcnx2
-2.877	5.868	4.066e-08	Nme7
-2.801	2.22	0.2101	Gm49692
-2.783	2.784	0.04077	Pianp
-2.777	6.307	0.2976	Colec12
-2.776	3.04	0.0002103	Rab37
-2.712	4.504	0.1224	Magi2
-2.261	9.84	7.714e-10	Arsb
-2.127	1.666	0.00987	Gm55594
-2.079	5.017	1.778e-06	Sfmbt2
-2.066	3.786	0.3612	Slc15a2
-1.878	3.605	0.0011	Rasgrp4
-1.855	4.501	0.0007203	Gm10138
-1.828	2.498	0.02433	Gm44257
-1.781	5.08	0.08992	Qsox1
-1.78	5.448	9.828e-07	Ubc
-1.73	3.626	0.1571	Angptl7
-1.691	5.593	0.001376	Alox5
-1.678	6.196	0.1475	Nhs
-1.641	2.884	0.09941	Adamts1
-1.598	3.642	0.01042	Id2
-1.58	7.074	0.2821	Gatm
-1.576	1.983	0.1342	Nox1
-1.57	3.647	0.1171	Il1b
-1.557	3.561	0.00754	9330185C12Rik
-1.498	2.435	0.02433	Hcar2
-1.492	3.482	0.04634	Sgsh
-1.471	2.593	0.02605	Ildr1
-1.434	2.417	0.02554	Relt
-1.421	3.333	0.01978	Map3k19
-1.417	3.312	0.08541	Cacng8
-1.401	3.182	0.07839	Klf2
-1.357	2.479	0.1712	Ier2
-1.356	5.654	0.0007203	Igsf8
-1.353	3.16	0.2274	Tnf
-1.347	2.334	0.04354	Mrpl36
-1.334	4.822	0.0002276	Bzw2
-1.332	5.233	0.01103	Zfp729a
-1.327	2.604	0.06435	Zfp458
-1.299	2.792	0.09327	Plppr4
-1.292	3.164	0.02907	Ebpl
-1.288	2.633	0.05166	Camkk1
-1.285	5.636	0.006383	Gm49342
-1.278	2.885	0.02398	Snu13
-1.269	2.868	0.01612	Spry1
-1.269	3.02	0.02433	Kcp
-1.268	4.326	0.7417	Gm26992
-1.262	2.961	0.04351	Bend3
-1.26	3.721	0.07823	Nr4a1
-1.258	4.809	0.08288	Gm27008
-1.257	3.029	0.0697	H1f4
-1.254	3.446	0.01569	Chic1
-1.25	1.993	0.2336	Nbl1
-1.226	3.955	0.2701	Fos
-1.22	2.636	0.2902	Gm12166
-1.209	2.5	0.04611	Hes1
-1.207	2.27	0.0347	Gm30411
-1.205	3.122	0.0277	Atp5md
-1.187	6.149	0.08008	Jun
-1.184	4.075	0.3741	Ppp1r15a
-1.18	4.601	0.003258	Pnp
-1.173	3.418	0.01308	Gm15441
-1.172	2.175	0.1336	Dlgap1
-1.17	2.38	0.8134	Kdm5d
-1.169	5.735	0.0007203	Tgm2
-1.168	2.672	0.02433	Capn1
-1.167	2.958	0.04162	Cnpy4
-1.166	3.416	0.1949	Gm15880
-1.159	2.455	0.1158	Kif1a
-1.152	5.599	0.005461	Ppp1r10
-1.145	3.709	0.01738	Zfyve21
-1.137	2.741	0.03643	Pdlim2
-1.136	2.829	0.2751	ENSMUSG00000120030
-1.131	2.931	0.02845	Sf3b4
-1.131	3.224	0.06546	Spock1
-1.128	2.766	0.07026	Gm45777
-1.124	2.454	0.1021	Iho1
-1.123	4.289	0.003666	Tagln2
-1.117	4.789	0.08834	Cd244a
-1.116	3.355	0.03829	Unc5cl
-1.112	7.443	0.04162	Bank1
-1.109	2.732	0.1393	Heg1
-1.108	3.912	0.05285	B4galnt1
-1.106	13.18	0.03238	Lars2
-1.104	6.59	0.01461	Bcl2
-1.1	4.043	0.2233	Arhgap27os3
-1.097	3.534	0.02537	Snrnp35
-1.092	5.552	0.004085	Ppia
-1.091	2.539	0.1224	Gm31243
-1.089	4.061	0.03927	Gm47469
-1.084	5.304	0.006162	Junb
-1.084	6.046	0.4203	Gm12865
-1.084	2.382	0.8534	Eif2s3y
-1.079	5.627	0.2139	Ctnnd2
-1.075	4.162	0.01008	Tmsb10
-1.072	5.697	0.002463	Gpx1
-1.072	5.286	0.005458	Cd52
-1.068	5.525	0.0004526	Cmtm8
-1.065	5.577	0.2807	Atf3
-1.064	2.628	0.09037	Klf10
-1.062	3.414	0.04366	Lrrc8b
-1.06	2.98	0.06872	Ppp1r18os
-1.057	3.656	0.01598	Glrx
-1.056	7.738	1.444e-05	Xpr1
-1.055	4.394	0.04441	Hmga2-ps1
-1.045	3.008	0.06674	Notch4
-1.044	3.731	0.09666	2810013P06Rik
-1.043	3.124	0.8766	Uty
-1.041	2.772	0.06353	Ccdc102a
-1.041	8.308	0.423	Cacna1a
-1.04	5.627	0.292	Rgs1
-1.034	4.145	0.1294	Marcksl1
-1.033	4.627	0.004221	Cdk5rap1
-1.032	4.178	0.01865	H2az1
-1.031	3.539	0.03263	Tlcd2
-1.03	2.734	0.04811	Nhp2
-1.029	3.09	0.03829	Trappc1
-1.027	3.948	0.04611	Ccdc62
-1.027	4.347	0.04696	Nectin2
-1.026	3.701	0.04205	Gm20186
-1.023	2.81	0.07923	Trmt112
-1.018	4.206	0.5619	Fosb
-1.017	2.986	0.0388	Espl1
-1.015	5.696	0.001914	Lypd6
-1.01	3.743	0.03037	Myc
-1.009	2.807	0.09521	Sra1
-1.008	2.796	0.07576	Mfge8
-1.004	3.497	0.0277	Pvr
-1.001	3.224	0.0272	Dok3
-0.9995	3.022	0.03739	Nop10
-0.9971	3.355	0.08866	Igfbp4
-0.9923	3.925	0.03604	Lrrc25
-0.9895	2.534	0.07434	Gm45472
-0.9891	2.768	0.09327	Sh2d4b
-0.988	9.458	0.02749	Gm15564
-0.9874	3.781	0.01923	2310033P09Rik
-0.9839	2.53	0.08182	Ap5s1
-0.9832	5.007	0.003415	Pdia5
-0.982	2.604	0.1828	Il18rap
-0.9789	3.175	0.03829	Fam167b
-0.9774	3.646	0.06552	Rpl15
-0.9735	7.081	0.1004	Il1a
-0.9719	4.169	0.02749	Epha2
-0.969	4.146	0.1553	Bcl2a1a
-0.9684	4.207	0.2529	Ccrl2
-0.967	4.575	0.01116	Cdk5r1
-0.9651	3.823	0.01445	Nifk
-0.9628	5.767	0.2578	C5ar1
-0.9625	3.215	0.09501	Srm
-0.9597	3.55	0.03855	Etfb
-0.9595	4.414	0.5623	Gm11867
-0.957	4.178	0.01175	Pqbp1
-0.9558	5.739	0.02339	Btg2
-0.9522	4.545	0.01561	Errfi1
-0.9522	2.911	0.05131	Spr
-0.9491	3.177	0.07589	Cebpd
-0.9489	5.294	0.0124	Adrb2
-0.9442	2.947	0.1021	Nudt16
-0.9411	2.749	0.1037	Ankrd49
-0.9408	4.92	0.02907	Arrdc3
-0.9405	2.764	0.1084	Gm30198
-0.9375	3.693	0.04119	C1qbp
-0.9366	3.28	0.04119	AI504432
-0.9361	4.777	0.02433	Naaa
-0.9333	2.699	0.1004	Mrpl47
-0.9293	6.3	0.07291	Tom1l1
-0.9257	2.48	0.1828	Prkcz
-0.9255	2.753	0.06402	Gm19708
-0.9232	6.953	0.04901	Gpr183
-0.9225	2.644	0.2508	Mrpl41
-0.9217	2.482	0.2231	Mtln
-0.9214	5.2	0.00553	Mid1ip1
-0.9196	5.662	0.04077	Furin
-0.919	6.187	0.003778	Sfi1
-0.919	6.46	0.005461	Srgn
-0.9168	4.233	0.03961	Ssr2
-0.9098	2.969	0.09928	Ap5b1
-0.9091	2.567	0.08263	Fam136a
-0.9035	4.434	0.1078	Sdf2l1
-0.9031	3.338	0.05794	Ccl12
-0.8934	4.273	0.02932	Cd276
-0.8931	2.577	0.1366	Gm10076
-0.8885	6.383	0.00457	Hsp90aa1
-0.8838	6.413	0.003978	Actg1
-0.8837	3.75	0.04015	Patl2
-0.8832	3.408	0.07839	Psenen
-0.8811	3.849	0.05938	Socs3
-0.8808	3.944	0.3224	Dusp1
-0.8797	5.128	0.006162	Myl12a
-0.8787	3.831	0.3757	Gem
-0.878	4.767	0.02472	Kdm6b
-0.8767	4.378	0.03791	A630089N07Rik
-0.8734	3.088	0.08589	Uqcrq
-0.8713	4.836	0.01385	Lfng
-0.8708	3.875	0.0388	Chchd2
-0.8668	6.503	0.2686	Rasgef1b
-0.8654	3.181	0.0893	Gimap6
-0.8652	3.781	0.02916	Prdx3
-0.8648	2.368	0.3577	Med21
-0.8643	2.3	0.4428	Ptger3
-0.8638	3.42	0.1244	Gm54867
-0.8627	3.455	0.08992	Hypk
-0.8626	3.997	0.02537	Ndufa4
-0.8622	5.714	0.1179	Zfp36
-0.8619	4.493	0.01787	Slc7a5
-0.8616	2.976	0.08964	Psmd10
-0.8593	2.9	0.3729	Gch1
-0.8584	4.24	0.0277	Rnf7
-0.8575	3.266	0.05596	Smim30
-0.8564	4.459	0.187	Srgap3
-0.8554	4.552	0.2736	Ccl4
-0.8524	4.85	0.01045	Arf6
-0.8512	3.246	0.1418	ENSMUSG00000121207
-0.8481	3.348	0.1266	Trib1
-0.8449	2.541	0.1738	Eid2b
-0.8413	4.022	0.5801	Gnb4
-0.8378	4.183	0.0425	Clic4
-0.8351	2.523	0.201	Snrpg
-0.8329	4.674	0.2699	Fgl2
-0.8324	4.731	0.06276	Rpl35
-0.8303	3.118	0.1773	Oat
-0.8302	6.189	0.04309	Gas6
-0.8293	3.292	0.1346	Oaf
-0.8283	3.154	0.08929	Paip2b
-0.8283	3.18	0.1228	Uqcc2
-0.828	3.063	0.07111	2310022B05Rik
-0.8277	3.815	0.07235	Jam3
-0.8265	4.953	0.02763	Rpl18
-0.8246	2.689	0.1171	Grid2
-0.8233	2.956	0.09996	Tmem237
-0.822	2.656	0.2142	Snhg8
-0.8213	3.137	0.1415	Taf13
-0.8196	3.25	0.1165	H1f2
-0.8194	4.667	0.07208	Hrh2
-0.8178	2.652	0.1938	Dnajc9
-0.8132	4.901	0.06292	Rps10
-0.8113	2.567	0.3611	ENSMUSG00000120693
-0.8107	6.069	0.1373	Ube2e2
-0.8086	2.634	0.1584	Ubiad1
-0.8081	3.285	0.1327	Gm55604
-0.8072	3.407	0.05196	ENSMUSG00000120144
-0.8061	5.347	0.006383	Nudc
-0.8035	5.588	0.0201	Prdx1
-0.8008	3.871	0.04351	Med7
-0.7999	3.321	0.131	Fkrp
-0.7995	3.446	0.0474	Gtf3a
-0.7979	2.918	0.1712	Slirp
-0.7963	3.491	0.07397	Lamb2
-0.7918	3.554	0.08866	Ndufb1
-0.7917	5.472	0.02788	Rpl31
-0.7916	3.298	0.09404	Tpgs2
-0.7915	3.777	0.0425	Eif3i
-0.7906	5.609	0.09996	Creb5
-0.7898	3.243	0.09534	Gpd1
-0.7878	2.955	0.1135	Snrpe
-0.7872	5.606	0.2108	Nfkbiz
-0.7869	2.558	0.1478	Urod
-0.7868	2.866	0.2234	Mea1
-0.7863	4.77	0.01261	Irf2bpl
-0.7863	4.02	0.03872	Zfp595
-0.7858	3.24	0.07576	Atp5e
-0.7854	6.511	0.02918	Mir142hg
-0.7853	3.037	0.2701	Pdzrn4
-0.7853	4.479	0.3666	Ccl3
-0.7824	3.794	0.06552	Selenon
-0.7819	2.707	0.1104	Ciao2b
-0.7816	6.535	0.02433	Alox5ap
-0.7814	3.268	0.08182	Klhl13
-0.78	2.473	0.2612	Fxyd5
-0.7799	4.724	0.0376	Rpl38
-0.7781	4.147	0.02433	Cstb
-0.776	2.956	0.1481	Usb1
-0.7758	2.558	0.1955	Mrpl20
-0.7755	3.004	0.2101	Ndufa1
-0.7745	3.546	0.1192	Ctla2b
-0.7734	2.635	0.2385	Gm3252
-0.7723	7.48	0.5719	Rn7sk
-0.7721	2.641	0.1478	Ino80b
-0.7713	3.908	0.04901	Imp4
-0.7703	3.195	0.2385	Cry1
-0.7702	6.186	0.01602	Fads1
-0.7702	3.116	0.0994	Fam149a
-0.7699	2.471	0.3688	Atp5k
-0.7694	2.92	0.1493	Egr2
-0.7689	3.592	0.1228	Mfsd5
-0.7679	4.169	0.03829	Slamf8
-0.7678	4.554	0.06435	Ran
-0.7663	4.247	0.06285	Coq10b
-0.7653	5.499	0.01351	Dnajb4
-0.7647	4.208	0.04125	Mydgf
-0.7638	3.928	0.05898	Irf2bp1
-0.7638	5.58	0.1296	Rps6
-0.7632	4.193	0.1158	Nme2
-0.763	5.114	0.01635	Sox4
-0.7617	2.991	0.1746	Prorsd1
-0.761	5.356	0.06147	Rpl9
-0.76	8.923	0.0007374	Rnase4
-0.7594	2.309	0.3462	Grtp1
-0.7593	5.071	0.02907	Rpl28
-0.7586	4.439	0.0466	Dnajb1
-0.7571	4.488	0.03829	Atp6v1f
-0.7549	8.205	0.0008298	Ccr5
-0.7548	3.588	0.1309	Slc16a1
-0.7543	5.031	0.01726	Cwc15
-0.7538	3.801	0.07823	Cuta
-0.7538	3.718	0.08067	Cyc1
-0.7536	7.378	0.3561	Arhgap15
-0.7515	2.537	0.2596	Zfp429
-0.7514	3.728	0.233	Gsdme
-0.7504	2.604	0.2277	H2-DMb2
-0.7504	2.686	0.2626	4933433G15Rik
-0.749	5.144	0.08182	Rps20
-0.7488	2.624	0.6278	2610307P16Rik
-0.7486	5.141	0.03711	Nod1
-0.7482	2.695	0.1655	Ndufa11
-0.7462	3.967	0.2949	Prkcq
-0.746	11.85	0.007001	Cst3
-0.7457	3.835	0.09501	Tmem14c
-0.7455	4.673	0.2486	Gm37168
-0.7444	5.053	0.0272	Pdha1
-0.7418	4.377	0.0468	Clec4a2
-0.74	4.917	0.02763	Oaz1
-0.7396	3.799	0.04401	Ndufs8
-0.7392	6.254	0.0939	Rplp0
-0.7375	3.155	0.1126	Slc39a6
-0.7371	3.741	0.1104	Dpagt1
-0.7364	4.921	0.03653	Jund
-0.7363	6.483	0.05801	Dusp6
-0.7357	6.213	0.1884	Rpl13
-0.7346	3.028	0.09928	Tmem160
-0.7341	3.637	0.1486	Ndufb9
-0.734	3.116	0.1478	Cdk2ap2
-0.7334	3.115	0.1035	Gm41804
-0.733	2.806	0.1739	Gm44511
-0.731	3.65	0.1104	Nabp1
-0.7309	4.333	0.02433	Tprgl
-0.73	2.982	0.1285	Svbp
-0.7297	6.343	0.005458	Flna
-0.7265	2.683	0.2516	Gla
-0.7261	3.892	0.06089	Tpst1
-0.7244	3.28	0.1021	Asap2
-0.7232	3.74	0.3257	Osm
-0.7227	3.349	0.09245	Gpaa1
-0.7223	3.523	0.1104	Rbm43
-0.7216	5.601	0.03031	Rpl24
-0.7208	3.402	0.09465	Ndufs7
-0.7201	3.57	0.09521	Ost4
-0.7178	4.032	0.06497	P2ry10b
-0.7177	2.629	0.2407	Cox14
-0.7154	5.461	0.02123	D130009I18Rik
-0.7153	3.178	0.1257	Uqcrfs1
-0.7143	5.973	0.01602	Ccnd1
-0.7136	6.493	0.01651	Spcs2
-0.7116	4.249	0.04172	Ubqln2
-0.7114	4.175	0.1015	Rbm8a
-0.711	3.849	0.06261	Srp9
-0.7109	3.729	0.06292	Impdh2
-0.7105	4.116	0.09501	Cacybp
-0.7092	9.495	0.02632	Tmem119
-0.7087	3.338	0.1261	Elp5
-0.7072	4.014	0.2828	Pirb
-0.7064	4.034	0.09521	B4galt3
-0.7058	3.984	0.06988	Emg1
-0.7055	6.822	0.01189	Ogfrl1
-0.7052	5.199	0.0313	Mdh1
-0.7049	4.118	0.05938	Ciao2a
-0.7047	4.542	0.07687	Rpl39
-0.7046	6.53	0.005841	Gng10
-0.7043	3.345	0.1577	Pebp1
-0.7042	4.27	0.05064	Tuba1a
-0.7031	4.221	0.08748	Tmem100
-0.7021	3.452	0.1518	Tuba1c
-0.702	3.442	0.09325	Bmyc
-0.7018	3.549	0.1414	Ubl4a
-0.7012	2.901	0.174	Mettl17
-0.7008	5.778	0.02502	Ubb
-0.7007	2.829	0.2032	Uqcr10
-0.6996	7.963	0.07863	Hspa5
-0.6995	3.755	0.129	Dynll1
-0.6979	4.927	0.02433	Nxt2
-0.6978	3.313	0.1359	Psmb10
-0.6969	5.24	0.0277	Manf
-0.6949	3.526	0.1553	Oprm1
-0.6947	4.839	0.02426	Gm21988
-0.6947	3.109	0.2031	Tmcc3os
-0.6946	3.973	0.07928	Psmb4
-0.6943	4.693	0.02433	Fam217b
-0.6942	5.379	0.06335	Eef1b2
-0.6931	6.572	0.08153	Zfand5
-0.6927	4.096	0.1266	Zswim4
-0.691	2.886	0.2185	Sephs2
-0.6903	3.299	0.2052	D630045J12Rik
-0.6884	4.996	0.02426	Rcn2
-0.6882	3.551	0.1558	Pmaip1
-0.6877	5.887	0.03756	Rpl22
-0.6875	4.857	0.02457	Tspan4
-0.6873	2.929	0.2547	Zfp830
-0.6871	2.881	0.1824	Tinf2
-0.6867	2.958	0.2159	Atp5mpl
-0.6844	4.358	0.03032	Paqr3
-0.6838	3.148	0.1491	Cfap43
-0.6835	3.445	0.09892	Cox5b
-0.6835	2.905	0.1344	Gm20089
-0.6831	3.398	0.164	Alyref
-0.6823	4.925	0.0388	Plau
-0.6817	4.945	0.03633	Pcna
-0.6817	3.53	0.1184	Hmga1
-0.6813	3.71	0.1516	Glce
-0.6812	2.559	0.2636	Rpusd4
-0.6799	2.463	0.2224	Tlcd4
-0.6797	5.322	0.05222	Ier5
-0.6786	2.987	0.1974	Gm44686
-0.6784	5.224	0.05222	Rps17
-0.6776	4.616	0.8177	Msh5
-0.6775	3.039	0.1927	Snhg12
-0.6767	6.251	0.2237	ENSMUSG00000120580
-0.6764	7.022	0.02526	Slc2a5
-0.6763	4.573	0.03727	Puf60
-0.6757	3.182	0.263	Elob
-0.6728	10.12	0.008415	Tmsb4x
-0.6728	6.711	0.05734	Pdia6
-0.672	2.699	0.2607	Cycs
-0.6712	4.477	0.05622	Psmd3
-0.6695	3.898	0.08928	Uqcrh
-0.6684	6.205	0.1982	Rps5
-0.667	5.532	0.0093	Map3k20
-0.6662	4.027	0.05801	Lypla2
-0.6658	3.577	0.1567	Rpl22l1
-0.6657	3.628	0.1163	Smim7
-0.6638	5.914	0.01937	Tnfsf13b
-0.6636	5.373	0.01602	Txnrd1
-0.6605	4.836	0.07317	Ppp1r3b
-0.6597	3.785	0.1571	Gm49393
-0.6593	5.794	0.02851	Hspd1
-0.6589	2.859	0.1794	Gm7964
-0.6579	5.518	0.1104	Hyou1
-0.6578	3.812	0.1163	Rraga
-0.6577	2.798	0.2549	Timm13
-0.6571	5.607	0.04674	Cct6a
-0.6561	3.648	0.1045	Rpf2
-0.6558	4.914	0.0592	Tpm4
-0.6556	5.992	0.0343	Rpl8
-0.6554	3.613	0.2366	Gm44710
-0.6534	2.908	0.1623	Emc6
-0.6519	5.046	0.04617	Rpl36a
-0.6517	3.102	0.1558	Ndufs6
-0.6512	3.19	0.1481	Srrd
-0.6509	4.015	0.1307	Phax
-0.6507	5.611	0.04105	Tmed9
-0.6501	7.155	0.0266	Pfn1
-0.6489	3.021	0.2372	Smg8
-0.6471	6.187	0.04017	Rpl10
-0.6457	3.016	0.2314	Gm13269
-0.6451	9.388	0.1317	Filip1l
-0.6446	3.272	0.2048	Ndufa2
-0.6435	3.21	0.1671	Gm9949
-0.6434	4.879	0.04404	Mgat2
-0.6424	5.43	0.0272	Drg1
-0.6417	6.476	0.01602	Tspan13
-0.6411	3.47	0.2095	Polr2g
-0.641	5.172	0.02935	Tlr9
-0.6403	4.02	0.06498	Hmgb2
-0.6403	11.71	0.2413	Gphn
-0.6395	6.064	0.02549	Slc25a5
-0.6394	6.803	0.004751	Naalad2
-0.6382	4.413	0.05201	Jpt2
-0.6379	3.903	0.1594	Plscr3
-0.6378	5.564	0.8247	Ccr6
-0.6373	5.718	0.01266	Cln8
-0.637	6.751	0.02491	Coro1a
-0.6369	3.83	0.07839	Tm2d2
-0.6367	2.71	0.2225	Dmap1
-0.6366	5.374	0.05609	1700025G04Rik
-0.6364	3.552	0.2016	Tceal9
-0.6364	4.839	0.2737	Gbp7
-0.6359	5.755	0.01937	Dnajb11
-0.6352	3.208	0.1389	Grpel1
-0.6352	3.661	0.2277	Fasn
-0.6346	5.271	0.0266	Tspan31
-0.6345	3.823	0.143	2410002F23Rik
-0.6332	3.855	0.1158	Ube2m
-0.632	2.856	0.2915	Sacs
-0.6292	8.303	0.01461	Ssbp2
-0.6292	5.606	0.02028	Lpar6
-0.6284	3.264	0.4286	Tspo
-0.6278	4.615	0.06516	Smim10l1
-0.6278	3.645	0.09521	Ebp
-0.6277	5.259	0.05374	Rpl35a
-0.627	3.491	0.2267	Krtcap2
-0.6262	5.649	0.0939	Rpl19
-0.6261	7.998	0.01042	Tnfrsf21
-0.6261	6.258	0.174	Rpl32
-0.6261	3.518	0.1938	Cox7a2
-0.6258	3.51	0.2117	Csrnp1
-0.6251	3.816	0.09531	Phb2
-0.6246	7.848	0.01738	Hspa8
-0.6245	4.254	0.1045	Bub3
-0.6243	3.363	0.1037	Pus1
-0.624	10.28	0.2404	C1qa
-0.6236	5.483	0.03121	Abce1
-0.6231	9.712	0.3313	Il31ra
-0.6228	6.031	0.04918	Rpl11
-0.6225	6.801	0.01937	Arl4c
-0.6225	3.056	0.1828	Atp5g1
-0.6208	3.874	0.09349	Mmut
-0.6206	6.866	0.01274	Myo1b
-0.6204	3.897	0.1794	Ets2
-0.6204	5.936	0.1843	Rpsa
-0.6201	2.738	0.269	Shmt2
-0.6196	3.02	0.2003	Commd2
-0.619	5.472	0.02408	Rsl1d1
-0.619	4.157	0.1351	Galnt4
-0.6183	3.797	0.09325	Psmb6
-0.6178	5.462	0.07363	Rps15
-0.6171	4.252	0.0697	Cox6c
-0.6165	3.342	0.3859	Tex14
-0.6157	4.355	0.1033	Park7
-0.6156	4.582	0.06988	Drap1
-0.6154	4.885	0.05189	Cd302
-0.6145	3.773	0.1067	Ruvbl2
-0.6138	6.552	0.01816	Evi2
-0.6136	6.469	0.0272	Hnrnpab
-0.6131	6.111	0.04696	Ckb
-0.613	5.8	0.05027	Dusp16
-0.6129	2.329	0.4095	Pole3
-0.6124	5.197	0.06498	Sgip1
-0.612	4.6	0.08327	Mafk
-0.6119	5.399	0.06039	Psme1
-0.6119	3.798	0.1171	Gpr35
-0.6117	4.738	0.2003	Bcl6
-0.6106	3.605	0.1086	Ndufb10
-0.6104	6.333	0.08263	Rpl17
-0.61	5.968	0.1271	Rps27a
-0.6095	4.052	0.08035	Tvp23b
-0.6087	2.655	0.545	Rdh14
-0.6074	3.742	0.1232	Cox5a
-0.6066	3.13	0.1909	Ghdc
-0.6059	7.898	0.03831	Tyrobp
-0.6058	14.84	0.07291	Cmss1
-0.6056	4.609	0.06487	Cbx4
-0.6053	2.919	0.2965	Lsm4
-0.6046	3.831	0.1518	Tbl2
-0.6045	2.956	0.2404	Rhoc
-0.6039	4.804	0.2778	Gm12610
-0.6029	2.795	0.3506	1810024B03Rik
-0.6021	2.974	0.5445	Tada3
-0.602	2.754	0.2766	Romo1
-0.6012	5.523	0.04119	Tmco1
-0.6008	3.919	0.1115	Isyna1
-0.6006	2.809	0.2735	Tceal8
-0.6002	4.171	0.07302	Sod1
-0.6001	17.05	0.0272	Rn18s-rs5
-0.6	5.781	0.02426	Xbp1
-0.5995	4.067	0.08879	Gm20528
-0.5982	2.791	0.1952	Qsox2
-0.5977	3.228	0.4279	Bcl2a1d
-0.5972	2.802	0.2354	Lyrm2
-0.5967	7.896	0.006573	Atg10
-0.5967	3.778	0.1715	Hexim1
-0.5965	4.372	0.09345	Rbm42
-0.5965	3.069	0.3058	Rpl36al
-0.5964	7.512	0.0201	Cd68
-0.5962	3.711	0.1809	Txn1
-0.5958	6.367	0.01582	Sting1
-0.5957	6.961	0.05308	Tlr13
-0.5956	2.948	0.1884	Aldh3b1
-0.5952	5.369	0.02384	Stk17b
-0.5941	6.289	0.0164	Evi2a
-0.5927	4.989	0.108	Tm7sf3
-0.5924	2.86	0.4515	Gm44577
-0.5922	5.8	0.01923	Dstn
-0.5918	6.817	0.009587	Wdr1
-0.5916	4.194	0.104	Zfp513
-0.5915	6.106	0.1211	Rps24
-0.5905	4.177	0.08335	Cox6b1
-0.5903	3.105	0.208	Armcx2
-0.5899	4.309	0.1235	Cebpb
-0.5898	4.618	0.0939	Ranbp1
-0.5895	4.539	0.09123	Tmed3
-0.5888	4.611	0.08541	Klk8
-0.5879	4.098	0.08819	Acvrl1
-0.5877	2.789	0.2645	Magoh
-0.5874	4.308	0.1431	Ninj1
-0.5873	4.642	0.1228	Irf1
-0.5873	4.829	0.205	Ddit3 - ENSMUSG00000025408
-0.5863	7.045	0.2713	Ipcef1
-0.5859	3.427	0.1682	Prps1l3
-0.585	4.125	0.1183	Rnf24
-0.5845	2.739	0.2629	Gm41611
-0.5841	7.099	0.01461	Eif4a1
-0.584	3.707	0.2106	D8Ertd738e
-0.5839	3.83	0.2105	Atp5j2
-0.5838	3.129	0.2101	1810009A15Rik
-0.5837	2.669	0.2597	Utp23
-0.5837	2.509	0.2902	Prxl2b
-0.5829	4.126	0.1126	Blm
-0.5825	4.666	0.1112	Masp1
-0.5823	3.69	0.154	Gm20721
-0.5821	6.611	0.04401	Commd8
-0.5819	3.72	0.2442	Naf1
-0.5812	3.1	0.2299	Erh
-0.581	11.33	0.0173	Actb
-0.5804	4.901	0.03534	Sptssa
-0.5803	5.911	0.02907	Ptbp1
-0.5801	4.465	0.1448	Rpl36
-0.5788	3.954	0.1459	Rmi1
-0.5779	3.626	0.1656	Ipo4
-0.5778	4.605	0.06988	Ddx54
-0.5772	3.151	0.2584	Sc5d
-0.5771	2.298	0.4106	Pycr2
-0.577	2.795	0.3169	Tmem60
-0.5761	6.385	0.07755	Rplp2
-0.576	2.776	0.2858	Mamdc4
-0.5754	1.805	0.875	Gm24407
-0.5752	7.94	0.009423	Rhoa
-0.575	3.424	0.2645	Ltv1
-0.5747	7.247	0.04086	Pea15a
-0.5745	4.838	0.1309	Slc39a1
-0.5737	5.043	0.03829	Pomp
-0.5732	7.223	0.02433	C3ar1
-0.5727	6.795	0.09701	Klf7
-0.5726	3.216	0.2021	Tmem256
-0.572	5.099	0.05898	Tpbgl
-0.571	3.848	0.1168	Eif4e3
-0.5705	6.711	0.09758	P4hb
-0.5702	2.533	0.3108	Ndufa5
-0.5701	6.197	0.1247	Rps29
-0.5701	3.568	0.1832	Tma7
-0.5699	5.049	0.3279	Rpl34
-0.5691	5.631	0.05326	Rps15a
-0.5688	5.115	0.1505	Rps21
-0.568	6.671	0.03791	Cd34
-0.5679	4.494	0.07445	Prdx5
-0.5676	4.281	0.08092	Homer1
-0.5676	4.002	0.1234	Grcc10
-0.5675	7.06	0.01602	Tspan18
-0.5672	7.381	0.02491	Calm1
-0.5667	5.263	0.05627	Cct3
-0.5666	2.548	0.3706	Cdc34
-0.5665	5.062	0.06362	Rpl10a
-0.5661	2.826	0.2651	Zbtb22
-0.566	2.841	0.2813	Haus7
-0.5659	4.376	0.1499	Ctdspl
-0.5657	6.027	0.0272	Klf6
-0.5655	5.761	0.07232	Gabarap
-0.565	3.338	0.2803	Phospho1
-0.5646	2.719	0.2904	Rpl37rt
-0.5644	5.955	0.1183	Lman1
-0.5642	4.49	0.09327	Tmem109
-0.5638	3.649	0.2548	Eif2b4
-0.563	2.984	0.2737	Sesn2
-0.5622	4.999	0.05141	Hnrnph2
-0.5621	5.805	0.0408	Arpc3
-0.5621	5.094	0.06292	Chmp1b
-0.5621	3.745	0.2387	Rbmxl1
-0.562	6.549	0.2128	Rps8
-0.5613	5.175	0.04918	Cers2
-0.5602	8.775	0.00794	P2ry13
-0.5599	4.843	0.05326	Tuba1b
-0.5598	6.58	0.02774	Atp5b
-0.5593	5.542	0.02472	Sub1
-0.5589	6.022	0.05613	Rps14
-0.5589	5.867	0.2345	Rpl41
-0.5588	4.13	0.1712	Srp14
-0.5582	3.197	0.2505	Mrpl17
-0.5582	2.755	0.297	Tbl3
-0.5581	2.643	0.3472	Mrpl12
-0.558	2.788	0.312	A430033K04Rik
-0.5576	3.624	0.2052	Chmp1b2
-0.5574	3.741	0.1607	Psmb3
-0.5572	8.169	0.00277	Ctsc
-0.5572	6.183	0.02623	Btg1
-0.5569	4.81	0.04958	Eloc
-0.5567	6.106	0.2354	Bcl2a1b
-0.5566	4.485	0.1028	Mcrip1
-0.5565	5.065	0.1028	Ccng1
-0.5562	3.014	0.2883	Per2
-0.5562	3.107	0.2932	Pno1
-0.5562	2.59	0.3729	Haus2
-0.5555	3.074	0.221	Odc1
-0.5553	4.582	0.07821	Lbh
-0.5549	5.254	0.03557	Nagpa
-0.5546	2.741	0.4181	Polr2c
-0.5542	5.529	0.07051	Ppib
-0.5528	5.319	0.07836	Ldha
-0.5527	6.708	0.1982	Rplp1
-0.5527	9.57	0.2702	Mir6236
-0.552	2.964	0.2234	Nlrx1
-0.5515	2.728	0.2976	2510002D24Rik
-0.5511	5.149	0.0468	Pcyox1
-0.5509	8.9	0.1219	Pdia3
-0.5505	3.189	0.228	Emc4
-0.5494	5.775	0.05272	Lman2
-0.5488	3.511	0.1795	Ddx39a
-0.5485	4.208	0.1073	Zfp770
-0.5476	2.54	0.3929	H2-Oa
-0.5475	3.398	0.2813	Ndufa3
-0.5466	3.364	0.4542	3110009E18Rik
-0.5464	3.432	0.4819	Tet1
-0.5463	5.364	0.06335	Morrbid
-0.5454	5.253	0.1493	Gpr84
-0.5454	2.81	0.3633	Fam122a
-0.545	9.123	0.02632	Hsp90b1
-0.5437	4.295	0.1501	Zfp729b
-0.5436	4.143	0.1163	Nasp
-0.543	8.911	0.2792	Olfml3
-0.543	2.897	0.2951	Sash1
-0.5428	3.023	0.2341	Ly6m
-0.5424	4.522	0.1765	Gm49368
-0.5417	4.693	0.1533	Psma4
-0.5417	3.239	0.2245	Wdr6
-0.5416	5.445	0.05779	Zkscan1
-0.5411	2.976	0.2813	Polr1c
-0.5409	4.365	0.2673	Ncoa7
-0.5407	2.855	0.3021	Dnpep
-0.5406	5.31	0.1257	Rps13
-0.5406	3.281	0.3389	Mcm4
-0.5402	2.995	0.3295	Msto1
-0.5394	6.485	0.03927	Eif1
-0.5393	3.495	0.1712	Rsc1a1
-0.5392	4.929	0.06127	Jpt1
-0.5389	7.18	0.07291	Txnip
-0.5389	3.444	0.214	Akr1b3
-0.5375	6.01	0.02526	Eloa
-0.5375	2.959	0.2967	Tlnrd1
-0.5375	2.95	0.3392	Zfp46
-0.5368	4.272	0.1621	2410006H16Rik
-0.5368	3.735	0.2703	Mrpl52
-0.5368	4.311	0.4532	Nfkbid
-0.5367	3.236	0.302	Snapc5
-0.5366	5.799	0.0591	Hspa9
-0.5366	4.492	0.1021	Aldh2
-0.5363	6.357	0.0522	Gcnt2
-0.5358	4.442	0.1007	Ube2a
-0.5357	6.699	0.08886	Etv5
-0.5351	4.658	0.1126	Fcgrt
-0.535	3.178	0.3204	Cryba4
-0.5349	6.88	0.03653	Rpl21
-0.5346	3.782	0.1796	Nans
-0.5344	6.239	0.04162	Tmem86a
-0.5343	5.841	0.04688	Nfe2l1
-0.5343	5.29	0.08964	Mlf2
-0.534	7.563	0.02907	Itm2c
-0.534	3.352	0.2233	Ndufa8
-0.5339	2.846	0.393	Pet100
-0.5336	2.836	0.464	ENSMUSG00000121114
-0.5332	3.954	0.1553	Ubl5
-0.5326	4.184	0.1522	Snrpd3
-0.5324	3.627	0.2089	Oxsm
-0.5321	4.566	0.2908	AI506816
-0.5316	3.634	0.2858	Ciapin1
-0.5312	6.889	0.01445	Polr2a
-0.5308	6.685	0.2126	Rpl18a
-0.5307	2.705	0.2813	Cln6
-0.5303	3.858	0.1924	Prelid3b
-0.5298	4.215	0.1225	Kcnip1
-0.5297	7.424	0.1211	Cd164
-0.5294	3.965	0.1918	Cox7b
-0.5291	5.997	0.2864	Rpl26
-0.529	3.311	0.2825	Pagr1a
-0.5289	3.001	0.2993	Stoml2
-0.5286	2.987	0.25	Tmem115
-0.5284	3.046	0.2155	Gm44899
-0.5283	3.844	0.2548	Prmt1
-0.5281	3.131	0.423	2010013B24Rik
-0.5273	6.975	0.02887	Lrrc3
-0.5272	7.758	0.07966	Gcnt1
-0.527	7.547	0.05326	Fcgr2b
-0.527	6.529	0.1184	Eprs
-0.5264	6.175	0.1672	Rack1
-0.5258	4.262	0.4785	Celf4
-0.5256	4.676	0.3631	4933421O10Rik
-0.5252	6.842	0.07548	Soat1
-0.5242	3.959	0.1375	Syt11
-0.524	4.285	0.09521	Edf1
-0.5233	3.618	0.2701	Otud1
-0.5228	3.484	0.1972	Polr3k
-0.5227	6.861	0.01937	Tram1
-0.5223	3.395	0.1855	Pigh
-0.5214	4.875	0.2206	Gde1
-0.5203	3.611	0.2414	Prdx4
-0.5199	8.07	0.005458	App
-0.5197	5.96	0.1045	Etv1
-0.5191	3.837	0.1569	Map2k3
-0.5191	5.715	0.2354	Rpl12
-0.5182	7.036	0.1672	Rps4x
-0.518	6.062	0.1313	Rpn1
-0.5178	2.592	0.3581	H2aj
-0.5176	3.731	0.28	Pdcl3
-0.5175	8.507	0.1478	Calr
-0.5174	2.869	0.4028	Gpt2
-0.5171	4.618	0.1297	Chmp2b
-0.5169	5.614	0.06241	Zeb2os
-0.5163	4.184	0.1605	Dr1
-0.5161	5.244	0.07823	Hsbp1
-0.516	5.782	0.1813	Rpl7
-0.516	3.281	0.3817	Mif
-0.5159	2.749	0.3346	F730043M19Rik
-0.5158	5.576	0.4143	Amotl1
-0.5154	6.508	0.02907	H3f3b
-0.5152	6.535	0.02362	Selenof
-0.5147	6.182	0.05091	Naca
-0.5147	2.634	0.3621	Tmem147
-0.5145	6.485	0.02558	Ywhag
-0.5145	2.509	0.4538	9330133O14Rik
-0.5143	7.732	0.04401	Slc15a3
-0.514	3.042	0.2999	Zscan18
-0.5138	4.913	0.1558	Paics
-0.5136	3.271	0.92	Ddx3y
-0.513	2.601	0.3209	Mrps24
-0.5128	4.711	0.07288	Atf4
-0.5125	2.904	0.3402	Dhrs4
-0.512	3.496	0.3472	Pard3bos1
-0.5117	6.447	0.03829	Dnajc3
-0.5106	5.177	0.1126	Slc39a10
-0.5105	2.972	0.3059	Tmem276-zftraf1
-0.5104	6.683	0.07804	Sgk1
-0.5102	5.959	0.0343	Usp22
-0.5102	3.363	0.4005	Unc13b
-0.5102	3.936	0.625	Vcam1
-0.5099	4.353	0.2227	Hspe1
-0.5099	3.028	0.2807	Trim17
-0.5082	3.835	0.2149	Keap1
-0.5073	3.529	0.1962	Taf7
-0.5069	4.442	0.2331	Rpl27a
-0.5064	4.184	0.1126	Qars
-0.5062	6.742	0.02526	Bhlhe41
-0.5059	5.937	0.1326	Rpl37
-0.5058	6.763	0.03089	Prpf8
-0.5058	2.559	0.4967	Zfp759
-0.5055	5.182	0.05757	Paqr7
-0.5048	4.017	0.174	Cyp20a1
-0.5047	4.377	0.1393	Rabac1
-0.5044	5.62	0.08857	Cd14
-0.5044	6.619	0.103	Fau
-0.5043	4.521	0.1398	Ppp1r11
-0.5043	3.123	0.3023	Ccdc86
-0.5038	4.78	0.1713	Eif3d
-0.5036	2.159	0.5001	Gcsh
-0.5027	4.692	0.1228	Cetn3
-0.5022	2.528	0.5719	Gm12861
-0.5021	3.332	0.2604	1110059G10Rik
-0.5016	3.361	0.2336	Plrg1
-0.5012	5.725	0.1271	Rps27
-0.501	3.84	0.1651	Asnsd1
-0.5002	2.738	0.3048	Trip10
-0.4997	3.902	0.1738	Idh3a
-0.4996	4.076	0.1604	Adpgk
-0.4996	4.539	0.3114	Psma2
-0.4993	5.721	0.03184	Clptm1l
-0.4991	4.925	0.1841	Fhad1
-0.4985	2.868	0.3308	Taf4b
-0.4979	3.88	0.4195	Mcc
-0.4978	5.196	0.1383	Stxbp4
-0.4974	5.863	0.107	Plekho2
-0.4966	4.285	0.1571	Chmp2a
-0.496	4.144	0.1446	Nup210
-0.496	2.736	0.3831	Fzd7
-0.4957	3.959	0.1839	Yipf3
-0.4956	5.439	0.3627	Kxd1
-0.4953	4.554	0.234	Midn
-0.4946	4.927	0.136	Scp2
-0.494	4.218	0.1569	Eif3g
-0.4937	2.848	0.3561	Mrpl16
-0.4935	3.338	0.2632	G6pc3
-0.4932	2.849	0.342	Eef1e1
-0.4927	2.633	0.3899	Pla2g12a
-0.4924	2.811	0.4268	Mcm5
-0.4921	5.334	0.05932	Serf2
-0.4919	4.139	0.1828	Gtf2b
-0.4915	2.953	0.4125	Lyplal1
-0.4913	3.43	0.5043	Cdca7
-0.4912	4.938	0.1443	Adprh
-0.491	6.014	0.07397	Ssr3
-0.4904	6.406	0.02526	Atp5a1
-0.4902	3.61	0.1658	Batf
-0.4901	2.988	0.3257	Mrpl43
-0.4899	2.923	0.3279	Casp6
-0.4894	2.79	0.3204	Vkorc1
-0.4891	5.181	0.05632	Tmem268
-0.4891	2.816	0.401	Gm45411
-0.4883	4.433	0.2086	Cebpzos
-0.4879	2.876	0.3577	Rccd1
-0.4876	8.264	0.2873	Ftl1
-0.4873	3.599	0.2179	Abracl
-0.4869	7.548	0.02909	Ptms
-0.4866	4.664	0.1813	Irs2
-0.4865	5.493	0.07839	Endod1
-0.4863	3.292	0.3223	Banf1
-0.4861	4.532	0.1481	Psmd8
-0.4859	3.92	0.1832	Tmx2
-0.485	6.421	0.2813	Rps23
-0.4848	9.267	0.03861	Jarid2
-0.4848	3.715	0.2645	Phkg1
-0.4847	5.533	0.1099	Tnfaip8l2
-0.4843	7.682	0.01998	Hnrnpk
-0.4834	4.972	0.1344	Dnajb9
-0.4831	4.612	0.2152	Nolc1
-0.4827	3.505	0.2719	Slc25a1
-0.4824	5.079	0.06435	Ube2q1
-0.4824	2.662	0.3888	Slc39a3
-0.4819	6.484	0.05285	Magt1
-0.4818	2.659	0.4353	Mospd3
-0.4817	6.488	0.07566	Sqstm1
-0.4814	3.096	0.4388	Brca2
-0.4809	4.161	0.2117	Psmc4
-0.4809	2.997	0.2883	Coasy
-0.4804	3.321	0.2736	Abhd17a
-0.4803	2.664	0.4052	Gm4221
-0.4802	10.29	0.03346	P2ry12
-0.4799	4.543	0.1541	ENSMUSG00000120081
-0.4798	6.074	0.05361	Mat2a
-0.4798	5.283	0.1058	Ppp1ca
-0.4796	4.817	0.1028	Dipk1a
-0.479	5.989	0.09373	Pcbp1
-0.4789	3.023	0.2862	Cryz
-0.478	8.336	0.01278	Cap1
-0.478	3.687	0.2584	Rhbdf2
-0.4776	4.082	0.1655	Hmgn2
-0.4774	4.96	0.2293	Eef1d
-0.4774	2.69	0.4298	Tomm7
-0.4774	3.268	0.5838	Egr1
-0.477	4.332	0.2463	Cdk4
-0.4768	3.713	0.2813	Atp5d
-0.4756	5.479	0.04782	Myo1c
-0.4755	6.139	0.0461	Scd2
-0.4753	6.296	0.05326	Ipo9
-0.4753	4.782	0.2003	Nuak2
-0.4752	2.852	0.3146	Mfsd10
-0.4751	4.304	0.1635	Tm9sf1
-0.4747	4.051	0.2048	Slco4a1
-0.474	4.635	0.1761	Agpat1
-0.4739	4.909	0.1179	Mmd
-0.4738	5.023	0.1228	Hnrnpa0
-0.4738	3.457	0.3537	Dkc1
-0.4735	3.62	0.3584	Rbm15b
-0.4731	5.247	0.1048	Snap29
-0.4727	4.313	0.1438	Pabpc4
-0.4727	4.618	0.2086	Osgep
-0.4726	4.353	0.1569	Tor4a
-0.4725	2.57	0.3591	Maip1
-0.4724	5.969	0.1394	Gaa
-0.4723	4.041	0.1866	Mmgt2
-0.4723	3	0.3952	Cdkn2aip
-0.4722	8.254	0.02932	Cd53
-0.4721	2.559	0.3861	Nip7
-0.472	4.884	0.2419	Lactb
-0.4716	6.305	0.1478	Rpl5
-0.4716	4.914	0.2038	Selenos
-0.4714	3.962	0.2032	Sdf2
-0.4713	3.855	0.2417	Rrp7a
-0.4713	4.762	0.307	Vamp3
-0.4712	3.311	0.2658	Cib1
-0.471	4.009	0.164	Rpf1
-0.4705	3.421	0.3266	Pithd1
-0.4703	2.978	0.4139	Snhg1
-0.4702	4.563	0.1538	Ndufc2
-0.4701	4.329	0.2431	Nop2
-0.47	2.344	0.4994	Nr2c2ap
-0.4697	3.494	0.2986	Ticam1
-0.4696	3.104	0.4994	Dck
-0.4693	3.608	0.3294	Kars
-0.4686	3.092	0.4603	Eaf2
-0.4678	3.972	0.2578	Spcs1
-0.4673	4.7	0.1525	Psmd6
-0.4673	3.473	0.259	Mdm1
-0.4672	2.765	0.312	Thoc3
-0.467	3.953	0.2257	Get3
-0.4669	3.486	0.2702	Cinp
-0.4669	3.071	0.3036	Ppp1r14b
-0.4669	2.949	0.3389	Ovca2
-0.4665	4.716	0.104	Prxl2c
-0.4665	3.196	0.3141	Tmem258
-0.4657	8.241	0.1056	Hsp90ab1
-0.4657	3.946	0.1649	9330159M07Rik
-0.4651	7.943	0.1092	Rin2
-0.4651	3.63	0.2231	ENSMUSG00000120863
-0.4646	3.148	0.3389	Hgf
-0.4645	6.734	0.02763	Atp6ap1
-0.4643	4.273	0.1383	Cited2
-0.4643	3.926	0.2808	Elovl1
-0.4641	3.41	0.2898	Tmem128
-0.464	2.728	0.423	Cyren
-0.4639	5.922	0.3729	Rps11
-0.4638	2.815	0.4045	ENSMUSG00000121168
-0.4624	2.923	0.3341	Aarsd1
-0.4622	2.526	0.5719	Trerf1
-0.4621	5.478	0.1924	Rps25
-0.462	5.118	0.08288	Spint1
-0.4618	7.158	0.3576	Cd63
-0.4613	5.338	0.2123	Ifi30
-0.461	2.805	0.3704	Mrpl22
-0.4608	5.103	0.1372	Trim28
-0.4607	4.906	0.09701	Kdelr2
-0.4606	5.238	0.1327	Myadm
-0.4603	5.827	0.1211	Rpl6
-0.4603	3.62	0.2134	Slc30a1
-0.4602	3.139	0.2805	Aph1a
-0.4601	4.301	0.1952	Adi1
-0.4601	3.293	0.3342	Gm33370
-0.4594	4.939	0.1285	Psma7
-0.4594	4.677	0.1373	Iscu
-0.4593	3.868	0.2588	Prelid1
-0.4592	3.465	0.2701	1600012H06Rik
-0.4589	6.748	0.04125	Fcgr1
-0.4589	2.751	0.3853	Spata7
-0.4587	2.849	0.3823	Mrps7
-0.4586	5.907	0.05801	Ganab
-0.4585	7.501	0.05638	Med12l
-0.4585	4.834	0.08879	Usp5
-0.4585	3.111	0.3887	Mrpl58
-0.4584	5.69	0.1839	Rps18
-0.4583	3.767	0.2514	Dnajb5
-0.458	3.41	0.3402	Tlr6
-0.4579	3.465	0.2517	0610010K14Rik
-0.4577	2.841	0.4079	Ccdc124
-0.4576	3.081	0.3708	Mrps14
-0.4574	2.895	0.3657	Mrpl4
-0.4573	3.835	0.3146	Uqcrb
-0.4573	2.668	0.3464	Rsf1os1
-0.4572	3.654	0.314	Haao
-0.4561	3.506	0.292	Ccdc43
-0.456	2.698	0.3393	Plxna1
-0.455	4.019	0.178	Hif1an
-0.4546	4.51	0.2431	Got2
-0.4543	4.386	0.1943	Slc66a1
-0.4542	6.479	0.04125	Plod1
-0.4542	5.879	0.09819	Snx3
-0.4542	4.204	0.1838	Cnp
-0.4542	3.234	0.3667	Txnl4a
-0.454	3.147	0.3524	Map1lc3a
-0.4538	4.194	0.1518	Lamtor4
-0.4538	5.834	0.1816	Gnb2
-0.4532	2.462	0.4311	Ermap
-0.453	4.81	0.1372	Tspyl1
-0.4528	3.857	0.3764	Wdr46
-0.4526	7.494	0.03372	Sdcbp
-0.4523	5.131	0.1478	Mesd
-0.4523	2.683	0.4368	Cbwd1
-0.4518	4.4	0.3817	Cass4
-0.4516	4.347	0.1553	Txndc15
-0.4513	3.01	0.3887	2810001A02Rik
-0.4511	3.656	0.3057	Plin2
-0.4506	5	0.1394	Rps28
-0.4506	4.827	0.1796	Zc3h6
-0.4506	3.129	0.3584	Zdhhc24
-0.4504	6.193	0.0621	Arpc4
-0.4502	4.556	0.164	Bcl2l13
-0.4501	5.37	0.1565	Atp5pb
-0.4501	4.039	0.2333	Bag3
-0.4498	6.057	0.1104	Eif5a
-0.4497	4.801	0.112	Mvp
-0.4495	6.272	0.2426	Rpl14
-0.4489	6.744	0.2354	Rps9
-0.4487	7.272	0.02909	Hmgb1
-0.4485	3.243	0.407	AU022252
-0.4481	2.941	0.3651	Mdga2
-0.4479	3.178	0.3539	Gar1
-0.4478	5.874	0.04811	Naa50
-0.4477	3.044	0.4127	Bag5
-0.4477	2.525	0.6088	Mtus2
-0.4471	3.486	0.4353	Zkscan7
-0.4468	6.858	0.04205	Sowahc
-0.4468	4.792	0.4298	Tmem176a
-0.4467	4.303	0.2225	Jkamp
-0.4461	6.616	0.1796	Rps3
-0.4461	4.952	0.1897	Sema4c
-0.4458	4.153	0.1559	BC031181
-0.4458	4.115	0.2284	Cnih1
-0.4457	5.542	0.06988	Ctbp1
-0.4457	3.771	0.3689	Rfk
-0.4457	4.268	0.45	Nfkbib
-0.4456	3.62	0.2813	Asf1a
-0.4456	2.855	0.4667	Cactin
-0.4454	7.406	0.05258	Arhgdia
-0.4449	5.226	0.1228	Eif2s1
-0.4448	3.334	0.4474	Txndc17
-0.4448	3.703	0.6151	Cdkn1a
-0.444	2.955	0.3858	Tubb4b
-0.4438	5.816	0.08998	Fuca2
-0.4434	3.415	0.4944	Gm8091
-0.4431	5.025	0.1336	Mmp2
-0.4431	4.432	0.1649	Otub1
-0.443	5.554	0.08252	Rab35
-0.4428	4.143	0.209	Bpnt1
-0.4425	6.276	0.06292	Nucks1
-0.4423	5.606	0.1045	Eepd1
-0.4423	4.288	0.1913	Snrpa
-0.442	5.576	0.168	Ano10
-0.4419	3.912	0.2532	Slc39a14
-0.4413	4.212	0.2385	Donson
-0.4413	4.155	0.2653	Sde2
-0.4411	4.424	0.1824	Tmem259
-0.4408	5.882	0.1324	Surf4
-0.4408	3.417	0.4423	Mrps2
-0.4407	3.464	0.2967	Supv3l1
-0.4401	3.998	0.314	Yeats4
-0.44	7	0.02935	Ndfip1
-0.44	5.146	0.1669	Psmc2
-0.4392	6.041	0.1011	Ids
-0.4391	6.287	0.08191	Vcp
-0.439	2.737	0.5006	Gabrb1
-0.4389	5.089	0.2021	Prkab1
-0.4386	2.92	0.4661	Capn2
-0.4384	2.979	0.3424	Nlrp1c-ps - ENSMUSG00000121474
-0.4382	2.468	0.4689	Mrpl51
-0.438	3.76	0.2287	ENSMUSG00000121141
-0.438	2.774	0.4751	Haus4
-0.4378	4.602	0.1527	Smim15
-0.4377	4.861	0.1228	Hmgn1
-0.4375	3.581	0.277	Rbm38
-0.4374	7.178	0.06511	Arpc1b
-0.4373	3.614	0.3308	Gm26759
-0.4371	4.779	0.1965	Mtmr9
-0.4371	2.349	0.552	Col23a1
-0.437	4.416	0.195	Psip1
-0.4367	3.785	0.2795	Bloc1s6
-0.4365	3.451	0.3308	Extl2
-0.436	4.824	0.125	Mettl7a1
-0.4359	9.033	0.04401	Canx
-0.4358	3.131	0.3554	Naa10
-0.4353	2.871	0.4125	Vat1
-0.4349	2.388	0.5314	A930001M01Rik
-0.4346	3.787	0.2302	Mrpl42
-0.4343	4.907	0.1672	Mdh2
-0.4343	2.905	0.3811	Insig1
-0.4342	4.521	0.2908	Nfkb2
-0.434	4.004	0.2692	Tnks1bp1
-0.434	3.183	0.3562	Wipi1
-0.4334	3.993	0.3294	Arhgef3
-0.4333	3.51	0.3397	Ubald2
-0.4331	3.643	0.271	Septin6
-0.4323	4.557	0.3294	Chst1
-0.4321	3.098	0.3747	Cdc25a
-0.4317	5.424	0.1393	Adora3
-0.4317	3.644	0.2707	Taf6
-0.4313	2.656	0.5106	Gm39556
-0.4312	5.669	0.08908	Itpripl1
-0.4312	5.026	0.1321	Ssr4
-0.4307	6.018	0.0591	Ttll3
-0.4307	5.022	0.1019	Grap
-0.4305	4.628	0.1491	Eif3m
-0.4303	5.221	0.1656	Selenok
-0.4302	5.45	0.2936	Rps19
-0.4302	3.353	0.3537	Tmem126b
-0.4301	4.466	0.195	Ublcp1
-0.4301	4.907	0.1994	Gnl3
-0.4301	6.986	0.2117	Rpl3
-0.43	6.912	0.1238	Hnrnpa3
-0.4297	5.983	0.3337	Tpt1
-0.4296	5.603	0.09322	Hhex
-0.4293	4.176	0.218	Wdr36
-0.4288	4.183	0.2803	Umps
-0.4287	5.137	0.1948	Slc39a12
-0.4287	3.609	0.2955	Spag7
-0.4287	3.159	0.4268	Gm9320
-0.4286	5.719	0.09548	Tmpo
-0.4282	9.537	0.1147	Plek
-0.4281	5.708	0.3053	Rpl23a
-0.4275	4.886	0.1393	Naa12
-0.4275	3.133	0.358	Gnpnat1
-0.4273	4.333	0.2701	Plcb4
-0.4269	3.481	0.2858	Mdp1
-0.4267	6.099	0.08008	Fam111a
-0.4267	6.962	0.1021	Bsg
-0.4267	4.7	0.1738	Prpf19
-0.4266	3.625	0.2464	Orai3
-0.4263	10.7	0.02534	Lgmn
-0.4263	3.425	0.378	Mzt2
-0.4262	5.239	0.1553	Phgdh
-0.4255	3.98	0.4	Pter
-0.4252	6.283	0.6159	ENSMUSG00000120942
-0.4248	4.164	0.2883	Gabarapl1
-0.4233	3.609	0.2967	Jtb
-0.4232	4.567	0.2417	Fkbp2
-0.423	3.31	0.3673	Pdzd11
-0.4229	6.426	0.1175	Ssr1
-0.4228	4.126	0.2532	Gpx4
-0.4225	5.304	0.1235	Dennd2c
-0.4224	3.237	0.3718	Slc16a13
-0.4221	2.854	0.4	Tmem186
-0.4219	6.26	0.0952	Set
-0.4218	4.534	0.2427	Ndufa12
-0.4218	2.88	0.3827	Ddx51
-0.4214	3.798	0.2857	Adrm1
-0.4214	2.648	0.4317	Dbr1
-0.4214	2.784	0.4576	Nubp2
-0.4209	3.668	0.5768	Glo1
-0.4208	5.149	0.2245	Rps16
-0.4206	4.432	0.2115	Rnf34
-0.4201	8.426	0.04088	Gnai2
-0.42	3.286	0.3642	Mogs
-0.4199	4.83	0.2354	Mnt
-0.4198	6.089	0.1649	Cndp2
-0.4194	2.718	0.4189	Unc45a
-0.4191	6.671	0.06055	Arhgdib
-0.419	3.228	0.3341	6330403L08Rik
-0.4185	10.46	0.02099	Selenop
-0.4181	4.629	0.1892	Gm31763
-0.4181	3.52	0.2737	Peg10
-0.4176	9.282	0.01042	Ddx5
-0.4172	3.695	0.2813	Ybx3
-0.4168	5.751	0.09325	Kat7
-0.4167	6.127	0.06124	Rhog
-0.4167	4.291	0.2404	H1f0
-0.4164	2.755	0.453	Ndufb11
-0.4163	3.698	0.3463	Spryd7
-0.4162	5.227	0.2366	Tal1
-0.4159	3.285	0.4098	Atp5o - ENSMUSG00000022956
-0.4156	3.721	0.2813	Cyth2
-0.4153	7.682	0.3036	Rpl4
-0.4151	4.893	0.1414	Gtpbp4
-0.415	5.599	0.0939	9130015G15Rik
-0.4145	4.011	0.2632	Tesk1
-0.4142	3.352	0.3565	Gm17231
-0.4135	8.803	0.04824	Rtn1
-0.4133	3.896	0.2759	Matk
-0.4131	4.802	0.227	Kdelr1
-0.412	4.761	0.2643	Tmem44
-0.4119	5.485	0.1372	Dnaja2
-0.4116	3.508	0.3053	Wdr89
-0.4115	5.027	0.1732	Jup
-0.4114	5.991	0.07363	Syngr2
-0.4114	5.134	0.1661	Glmp
-0.4113	8.343	0.02909	Efhd2
-0.4113	5.353	0.1443	Tob2
-0.4112	4.936	0.1485	Tollip
-0.4111	3.067	0.3921	Poglut2
-0.4108	4.076	0.2535	Gm41764
-0.4104	4.393	0.2113	Alg10b
-0.4104	3.692	0.248	Wdr61
-0.4102	4.542	0.2564	Txndc5
-0.4098	7.101	0.04129	Ywhab
-0.4089	4.416	0.1935	Nedd8
-0.4085	2.588	0.5772	Snhg5
-0.4084	4.752	0.1996	Nrep
-0.4079	4.91	0.2337	Emc7
-0.4076	5.789	0.08711	Gm21970
-0.4075	5.699	0.1323	Skp1
-0.4074	4.676	0.2067	2900026A02Rik
-0.4074	3.09	0.3631	Timm17a
-0.4073	7.61	0.2032	Cfl1
-0.4072	5.414	0.1359	Atp6v1g1
-0.4071	4.287	0.2081	Ltbr
-0.4067	3.859	0.2267	Lamtor5
-0.4067	3.543	0.3204	Daxx
-0.4066	6.489	0.4748	Epb41l3
-0.4063	4.318	0.2514	Rpl27
-0.4059	6.639	0.08067	Tifab
-0.4056	4.956	0.1163	Arpp19
-0.4054	7.863	0.01985	Rac1
-0.4053	6.622	0.09662	Atp6ap2
-0.4053	4.782	0.1373	Tmed4
-0.4051	3.409	0.3863	Tmem184c
-0.405	3.469	0.3853	Phf11b
-0.4047	3.349	0.4279	Ech1
-0.4046	5.703	0.1321	Was
-0.4045	5.648	0.08992	Ergic3
-0.4044	5.191	0.09941	Tfg
-0.4044	4.955	0.1342	Slc39a8
-0.4043	2.667	0.5156	Polr1h
-0.4042	5.665	0.2911	Slc25a25
-0.4039	7.756	0.03872	Calm2
-0.4037	3.986	0.3239	Eid1
-0.4036	7.428	0.03829	Mlec
-0.4033	4.045	0.2673	Gng5
-0.4023	8.651	0.04003	Cables1
-0.4023	4.837	0.1738	Gid8
-0.4016	3.334	0.4348	Erg28
-0.4015	4.743	0.2548	Niban2
-0.4013	4.575	0.2975	Atraid
-0.4011	4.376	0.2807	Atf6b
-0.4006	4.086	0.2409	Ero1a
-0.3999	4.457	0.2353	Enoph1
-0.3999	4.314	0.2366	Ctdnep1
-0.3996	6.494	0.06591	Mapre1
-0.3994	5.128	0.3821	Prickle1
-0.3993	7.365	0.0376	Reep3
-0.3992	3.992	0.2777	Creb3
-0.3991	5.626	0.0893	Tlr3
-0.399	6.259	0.1608	Clic1
-0.3989	4.786	0.2965	Prkaca
-0.3984	6.547	0.1913	Tmed5
-0.3984	3.515	0.3673	Ddx49
-0.3982	3.641	0.3275	Stk35
-0.3981	5.091	0.3354	Xrcc5
-0.3979	4.505	0.1788	Hdgf
-0.3978	6.081	0.09404	Zfp706
-0.3977	5.669	0.128	H3f3a
-0.3972	3.487	0.4568	Tgif2
-0.3968	2.662	0.5246	Ighd
-0.3966	3.145	0.434	Plxna4os1
-0.3962	4.529	0.2205	Mgat4b
-0.3962	3.752	0.2935	2210016F16Rik
-0.3961	4.36	0.3143	Vps52
-0.3959	6.931	0.2039	Ybx1
-0.3956	3.264	0.3551	Uqcr11
-0.3954	2.278	0.7072	Smpdl3a
-0.3953	8.734	0.05285	Glul
-0.3948	3.291	0.402	Phf5a
-0.3946	7.491	0.06591	Npc1
-0.3944	8.305	0.1925	Eef2
-0.3944	3.712	0.3139	Brix1
-0.3943	5.438	0.1215	Slc26a2
-0.394	5.815	0.1227	Gngt2
-0.3938	2.516	0.4482	Exosc3
-0.3933	3.922	0.2626	Xab2
-0.3932	2.748	0.4588	Gm37229
-0.3931	5.593	0.2828	Nfkbia
-0.3929	4.174	0.2932	Gm48678
-0.3929	3.056	0.5259	Psmg2
-0.3927	5.645	0.1393	Calcrl
-0.3927	4.133	0.3044	Nol6
-0.3927	3.869	0.3144	Pdp2
-0.3926	3.032	0.5267	Mymk
-0.3926	3.209	0.5966	Thumpd1
-0.3922	5.78	0.3823	Rap1gap2
-0.3919	5.75	0.1369	Limd2
-0.3913	6.396	0.08374	Map7d1
-0.3912	5.662	0.1547	Spg20
-0.3912	6.264	0.2033	Gapdh
-0.3911	8.074	0.03184	Arpc2
-0.391	4.305	0.3294	Sgpp1
-0.3908	6.043	0.1624	Calu
-0.3904	4.922	0.1787	Sfr1
-0.3901	11.85	0.1985	Camk1d
-0.3894	7.264	0.1271	Aif1
-0.3892	5.954	0.3553	Spred2
-0.3891	4.494	0.2514	Nop14
-0.389	4.897	0.2239	Atox1
-0.3889	3.333	0.3845	Dpm2
-0.3888	4.386	0.2818	Hdhd2
-0.3887	3.502	0.3643	Slc12a4
-0.3886	5.044	0.1947	Nacc1
-0.3882	4.818	0.1795	Dnttip2
-0.3882	4.346	0.2523	Raet1e
-0.3882	6.869	0.2999	Arhgef40
-0.3881	3.238	0.3823	Prune1
-0.3879	3.389	0.5265	Lmtk2
-0.3878	6.377	0.1599	Selenot
-0.3878	3.841	0.3853	Erc1
-0.3875	5.32	0.1086	Cln5
-0.3875	3.791	0.4425	Zfp622
-0.387	4.569	0.3183	Psmc5
-0.3869	8.208	0.06582	Bin2
-0.3867	4.167	0.2721	Ints2
-0.3866	5.212	0.2086	Tnfrsf13b
-0.3864	3.981	0.3369	Arpc5l
-0.3863	5.115	0.1618	Lypla1
-0.3863	4.75	0.1939	Rars
-0.3861	3.582	0.529	Sesn3
-0.386	3.906	0.3922	Surf6
-0.386	2.974	0.4819	Tipin
-0.3859	4.399	0.3059	Dlg3
-0.3851	3.144	0.4994	Galnt6
-0.385	4.445	0.2417	Usp21
-0.3846	5.168	0.1372	Tspan3
-0.3846	3.694	0.4225	Creld2
-0.3839	3.965	0.3861	Mpc2
-0.3837	3.31	0.3893	Mrpl18
-0.3837	2.981	0.4203	1810037I17Rik
-0.3836	3.622	0.34	Hint1
-0.3826	4.426	0.2592	Prmt2
-0.3825	4.948	0.2233	Rbm22
-0.3823	3.255	0.3718	Smpd1
-0.3821	2.879	0.5076	Pde12
-0.382	6.346	0.1257	Vmp1
-0.382	4.922	0.1839	Nop56
-0.3818	2.791	0.4509	Llph
-0.3816	3.342	0.4029	Arfip2
-0.3811	5.537	0.2564	Rps26
-0.3809	7.308	0.05905	Ifnar2
-0.3809	6.813	0.06292	Tmem59
-0.3809	5.847	0.187	Vps33a
-0.3804	4.368	0.3021	Fam98b
-0.38	5.4	0.134	Dnajc2
-0.38	3.112	0.473	Hlx
-0.3798	6.087	0.08992	Rad23b
-0.3797	3.85	0.2949	Atg16l2
-0.3794	5.965	0.4056	Rps12
-0.3791	2.237	0.636	Tceal1
-0.3788	5.012	0.1567	Denr
-0.3786	3.884	0.4292	Tomm6
-0.3783	6.989	0.08288	Prkar1a
-0.3781	4.233	0.2865	Gatad1
-0.3777	3.736	0.3426	Ring1
-0.3776	6.292	0.3279	Pdia4
-0.3775	5.573	0.1753	Cct2
-0.3775	4.142	0.2642	Usp50
-0.3774	7.669	0.1548	Ywhah
-0.3771	7.744	0.08908	Ddx3x
-0.3771	5.562	0.1225	Sertad2
-0.3768	4.629	0.2862	Cybc1
-0.3768	3.285	0.448	Smim29
-0.3765	5.859	0.133	Uba1
-0.3762	8.741	0.03541	Tln1
-0.3762	4.247	0.3059	C1galt1
-0.3762	4.039	0.4537	Dnhd1
-0.3757	4.015	0.549	Baiap2
-0.3755	3.824	0.3183	Tsen34
-0.3754	6.178	0.1768	Serp1
-0.3754	5.358	0.1828	Eif3b
-0.3753	6.401	0.1333	Usp6nl
-0.375	4.103	0.314	Med28
-0.3747	4.055	0.3424	Acads
-0.3735	2.717	0.4819	Eef1akmt2
-0.3733	3.197	0.5691	Taf6l
-0.3732	2.614	0.5896	Rabl3
-0.3731	3.206	0.4828	Slc35b1
-0.373	4.556	0.2406	Arvcf
-0.3729	11.56	0.24	Ctss
-0.3727	4.122	0.2864	Dhx37
-0.3726	4.199	0.3686	Mt1
-0.3726	2.38	0.5903	Gm17690
-0.3717	12.08	0.04162	Hexb
-0.3716	2.529	0.5967	Dnajc17
-0.3708	6.113	0.2016	Tdrd3
-0.3707	5.146	0.1712	Eif1a
-0.3705	3.147	0.5381	Timm21
-0.3704	3.715	0.3389	Tmem242
-0.3704	3.609	0.4559	Asb8
-0.3697	3.45	0.4263	Ormdl3
-0.3696	3.645	0.4728	Fut11
-0.3695	5.521	0.2259	Tagap
-0.3693	4.446	0.2517	Zfp146
-0.3692	5.148	0.1283	Leprotl1
-0.3692	3.504	0.3958	Iah1
-0.369	3.882	0.3537	Zfp790
-0.3678	3.597	0.3815	Lyar
-0.3678	2.863	0.4361	2810002D19Rik
-0.3677	3.447	0.4663	Ndufb7
-0.3676	4.088	0.38	Rhobtb2
-0.3674	5.266	0.1974	Cse1l
-0.3671	4.6	0.2273	Pom121
-0.367	4.948	0.2087	Acat1
-0.367	4.395	0.4997	Dclk2
-0.3666	10.48	0.06309	Sparc
-0.3666	4.404	0.2904	Rnasel
-0.3666	3.693	0.4165	Nsmce4a
-0.3663	4.616	0.2691	Dld
-0.3659	3.844	0.4742	Mcm6
-0.3654	3.361	0.4009	Gyg
-0.3654	3.099	0.4316	Supt7l
-0.3648	3.513	0.3917	Higd2a
-0.3646	4.793	0.1955	Slbp
-0.3646	4.529	0.2736	Fis1
-0.3643	4.632	0.2217	Ostc
-0.3643	2.817	0.4975	BC029722
-0.3642	5.539	0.1393	Snx17
-0.3642	4.236	0.2307	Fam104a
-0.3641	3.644	0.3257	Hccs
-0.364	4.096	0.4446	Col25a1
-0.3639	6.156	0.1735	Shisa5
-0.3636	4.951	0.4506	Prkcsh
-0.3634	5.838	0.168	Tmem33
-0.3633	3.658	0.484	Fbxo30
-0.3627	5.623	0.1364	Erf
-0.3627	2.846	0.4416	Med11
-0.3626	3.559	0.3853	Rab10os
-0.3621	4.42	0.3252	Cops7a
-0.362	4.573	0.3059	Zc3h12a
-0.362	9.544	0.4469	Eef1a1
-0.3618	3.959	0.3024	Tfip11
-0.3617	4.603	0.233	Flot1
-0.3612	3.862	0.3778	Tmtc2
-0.3605	3.431	0.3817	Slc41a3
-0.3605	3.054	0.4538	Cnbd2
-0.3604	4.551	0.314	Btbd3
-0.3603	5.513	0.1528	Cxcl16
-0.3596	6.341	0.1021	Vdac2
-0.3591	3.812	0.3839	Eif1ax
-0.359	3.882	0.3606	Ndufa6
-0.3587	6.31	0.1411	Reep5
-0.3586	6.758	0.06582	Morf4l1
-0.3584	3.158	0.4809	Ccdc134
-0.3581	6.07	0.1655	Lat2
-0.3577	9.096	0.06127	Myh9
-0.3575	4.128	0.3266	Ak1
-0.3575	3.829	0.3481	Prpf31
-0.3574	5.431	0.4	Synj2
-0.357	6.402	0.09847	Azin1
-0.357	6.054	0.1212	Snx1
-0.3568	6.364	0.1345	A330023F24Rik
-0.3565	4.011	0.3308	Gm33100
-0.3565	2.697	0.5561	Glrx5
-0.3563	4.852	0.2354	Snrpb
-0.3563	6.916	0.2636	Serbp1
-0.3563	2.86	0.505	Timm17b
-0.3562	3.571	0.3412	Pef1
-0.3559	4.115	0.3297	Gtf2f1
-0.3557	8.564	0.1392	Trf
-0.3555	3.839	0.4972	Cox17
-0.3554	3.015	0.5204	Pigl
-0.3553	4.29	0.2421	Trim47
-0.3552	8.391	0.1219	Eif4g2
-0.3552	4.002	0.406	Tsr1
-0.3551	4.036	0.2704	Fam102a
-0.3549	4.479	0.2813	Strap
-0.3542	6.474	0.1414	Slc44a2
-0.3541	5.4	0.2944	Morf4l2
-0.3541	4.612	0.3689	Tmem9b
-0.354	3.921	0.4056	Nt5c3
-0.3539	5.38	0.1915	Snw1
-0.3538	3.641	0.4027	Zbtb33
-0.3537	4.381	0.3059	Phyh
-0.3537	3.574	0.3533	Rnf5
-0.3536	4.577	0.3565	Cox6a1
-0.3534	4.729	0.547	Got1
-0.3531	5.127	0.1878	Ppp2r1a
-0.353	6.107	0.08964	Wdr81
-0.3526	5.111	0.259	Polr2b
-0.3524	6.604	0.1376	Cnbp
-0.3524	3.371	0.4605	H2bc4
-0.3521	8.842	0.3643	Grn
-0.352	4.618	0.2814	Rnf19a
-0.3517	7.686	0.09412	Adgrg1
-0.3517	2.607	0.506	Lsm8
-0.3516	2.611	0.5523	Vangl2
-0.3513	5.382	0.1713	Spty2d1
-0.3511	5.327	0.1809	Ywhaq
-0.351	3.534	0.4591	Rsph3a
-0.3509	6.472	0.1048	Bzw1
-0.3502	3.934	0.4467	Gnl3l
-0.3498	4.939	0.2944	Tor1b
-0.3496	8.42	0.1021	Hexa
-0.3496	3.383	0.5094	Nme1
-0.3495	4.133	0.2853	Mocs1
-0.3494	2.449	0.5541	Gdpd5
-0.3491	2.695	0.7131	Rps27l
-0.3487	5.66	0.1398	Zdhhc5
-0.3485	6.375	0.185	Sil1
-0.3481	3.374	0.5157	Tmem179b
-0.348	5.903	0.1327	Necap2
-0.3475	7.477	0.1227	Rgs2
-0.3474	4.091	0.3294	Il1rl1
-0.3474	2.613	0.5171	Nepro
-0.3472	4.971	0.2514	Zfp40
-0.3471	8.219	0.05141	Adgre1
-0.3471	3.037	0.4386	Plpp6
-0.3469	4.048	0.3108	Gne
-0.3468	3.613	0.423	Pofut2
-0.3463	2.419	0.5903	Trappc2l
-0.3462	5.719	0.1478	Fuca1
-0.3462	4.232	0.2965	Rbm34
-0.346	7.825	0.04186	Hck
-0.346	3.703	0.4472	Zfp703
-0.3458	5.156	0.2016	Fam53b
-0.3458	5.246	0.2115	Lrp10
-0.3455	4.282	0.3204	Lbr
-0.3449	3.397	0.3975	Cd3eap
-0.3447	2.487	0.5389	Ccdc32
-0.3445	3.161	0.4671	Hax1
-0.3443	3.308	0.4631	Timm10b
-0.3443	3.224	0.4972	Mpv17
-0.344	7.773	0.06468	Ywhae
-0.344	4.261	0.333	Ginm1
-0.3436	2.859	0.4712	Nr2f6
-0.3435	4.115	0.4285	Smad6
-0.3435	3.492	0.4298	Pnkp
-0.3434	6.582	0.4439	Rpl23
-0.3432	6.879	0.129	Hspa4
-0.3432	5.836	0.1951	Lap3
-0.3432	3.338	0.4914	Ddx19b
-0.343	6.471	0.09025	Gltp
-0.343	6.177	0.1922	Npm1
-0.3429	3.183	0.5322	Myg1
-0.3428	2.999	0.4694	Nenf
-0.3428	2.567	0.5745	Crtap
-0.3427	4.778	0.2451	Eri1
-0.3426	4.718	0.2969	Pgrmc1
-0.3426	3.751	0.3537	Smyd5
-0.3423	6.377	0.1327	Nfic
-0.3423	3.347	0.5425	Zkscan2
-0.3423	2.679	0.5733	Qpctl
-0.3422	4.782	0.24	Casp1
-0.3418	6.834	0.1135	Lpcat3
-0.3418	5.284	0.2048	Zfp395
-0.3417	3.475	0.4867	Ift20
-0.3413	4.123	0.4962	Pilra
-0.3413	3.197	0.5293	Gatd3a
-0.3407	5.404	0.2277	Csf2rb2
-0.3407	4.674	0.2942	Dele1
-0.3407	4.109	0.3175	Ccdc167
-0.3405	4.932	0.2438	Frg1
-0.3403	4.915	0.3574	Pigt
-0.3401	3.879	0.3254	Arsa
-0.3401	3.354	0.4165	Trmt10a
-0.34	3.46	0.4715	Fosl2
-0.3399	3.655	0.4195	2810025M15Rik
-0.3398	4.439	0.3275	Mak16
-0.3397	5.273	0.1828	Slc35c2
-0.3396	4.814	0.2873	Psme2
-0.3395	2.636	0.5419	Tusc2
-0.3392	3.152	0.4907	Chrac1
-0.3388	6.167	0.1292	Saraf
-0.3388	4.407	0.2644	Crlf2
-0.3387	6.467	0.09501	Sec62
-0.3387	5.58	0.2115	Plaa
-0.3385	3.505	0.4169	Tmem185b
-0.3383	7.317	0.08908	Mob1a
-0.3383	5.759	0.3484	Rpl7a
-0.3381	6.493	0.1649	Lysmd4
-0.3375	2.871	0.502	Ccdc173
-0.3374	7.252	0.07401	Samsn1
-0.3374	6.591	0.1577	Ssb
-0.3374	2.928	0.6175	Nmrk1
-0.337	8.234	0.1224	Ctsa
-0.3369	8.196	0.06991	Fcgr3
-0.3368	5.568	0.2284	Trp53bp2
-0.3364	9.532	0.04958	Klf12
-0.3364	5.039	0.2366	Zyx
-0.3362	5.546	0.218	Pnrc1
-0.3356	6.288	0.2233	Tubb5
-0.3352	3.901	0.4067	Sap18
-0.3351	2.714	0.5204	Amer1
-0.335	4.348	0.3893	Ahsa1
-0.3345	4.101	0.3389	Faim
-0.3343	5.621	0.4264	Rpl37a
-0.3341	7.822	0.1059	Daglb
-0.3341	3.9	0.3876	Sfxn3
-0.3341	2.778	0.5727	Pgam1
-0.3339	5.576	0.2074	Nras
-0.3338	4.584	0.2739	Alg11
-0.3336	3.027	0.5384	Prkaa2
-0.3334	4.904	0.2251	Slc25a4
-0.3333	11.16	0.0266	Csf1r
-0.3331	4.955	0.3121	Yipf6
-0.3327	6.032	0.6617	Rbpms
-0.3323	3.456	0.3883	Drg2
-0.3323	2.876	0.6277	Palb2
-0.3322	3.42	0.3921	Mlx
-0.3321	2.678	0.6126	Mex3b
-0.3319	7.182	0.101	Ywhaz
-0.3319	4.555	0.3653	Plk3
-0.3319	4.168	0.4063	2510039O18Rik
-0.3318	3.887	0.3458	Mapk6
-0.3316	6.268	0.1414	Arf4
-0.3316	5.572	0.1599	Cnpy3
-0.3316	3.031	0.5419	Ralgds
-0.3315	6.825	0.0939	Sf1
-0.3314	4.253	0.3732	Map7
-0.3314	4.131	0.4388	Pgm2l1
-0.3311	5.618	0.2244	Hebp1
-0.3311	3.834	0.4424	Sf3a2
-0.331	6.01	0.2404	Rhbdd1
-0.3309	6.872	0.1794	Tgoln1
-0.3308	5.501	0.2002	Cnot8
-0.3307	5.317	0.256	ENSMUSG00000121501
-0.3307	4.852	0.2694	Lrrc59
-0.3307	4.834	0.3589	Rnf187
-0.3305	7.191	0.1651	Ust
-0.3302	6.714	0.1806	Tapbp
-0.33	6.701	0.1795	Eif3c
-0.3297	5.023	0.2943	Ap2m1
-0.3296	2.872	0.5319	Tyw3
-0.3296	5.737	0.629	Rps7
-0.3291	5.014	0.2778	Arl1
-0.3288	5.737	0.2299	Abhd2
-0.3288	3.909	0.4238	Ifi35
-0.3287	4.032	0.4172	Dda1
-0.3284	4.49	0.4297	Nol7
-0.3283	5.372	0.3435	Ilk
-0.3283	3.147	0.4538	Ddx59
-0.3282	3.999	0.3992	Tpm1
-0.3282	3.283	0.4797	Pcnx4
-0.3277	3.872	0.4268	Cdipt
-0.3276	2.763	0.5795	Wdr18
-0.3274	5.256	0.2944	Pa2g4
-0.3273	3.502	0.4581	Tmem161a
-0.3272	4.792	0.393	Fkbp4
-0.3269	4.198	0.3195	Sf3b6
-0.3269	4.766	0.3505	Nop58
-0.3269	4.456	0.4367	Zfp664
-0.3268	6.11	0.3024	Sall3
-0.3267	3.906	0.3565	Dok1
-0.3267	3.529	0.4478	Exosc9
-0.3261	4.432	0.4298	Atpif1
-0.326	5.687	0.1895	Ddost
-0.3258	3.893	0.3655	Mocs2
-0.3256	3.785	0.435	Ggcx
-0.3256	3.88	0.4421	Pctp
-0.3253	4.568	0.4063	Bend6
-0.3253	3.875	0.4674	Hars
-0.325	6.539	0.1832	Tlr4
-0.3249	2.865	0.5388	Men1
-0.3248	5.568	0.2277	Zbtb1
-0.3245	2.893	0.7196	Ift43
-0.3235	3.355	0.518	Ncaph
-0.3234	5.985	0.1839	Sptan1
-0.3232	3.09	0.536	1700123O20Rik
-0.323	5.048	0.2808	Med22
-0.3228	5.289	0.2736	Ppp1r13b
-0.3227	3.504	0.5304	Ormdl2
-0.3226	4.872	0.3774	Nhsl2
-0.3225	2.677	0.6199	Zfp39
-0.3219	7.085	0.195	Pmp22
-0.3219	2.658	0.5719	Kpna2
-0.3217	5.473	0.2277	Klhl9
-0.3215	2.923	0.4972	Nlgn1
-0.3213	2.83	0.5537	Fam210b
-0.3212	3.412	0.5264	Zfas1
-0.3211	3.168	0.456	Nop16
-0.3211	2.899	0.5619	Gm48099
-0.3208	4.548	0.2925	Hspa13
-0.3208	3.192	0.4722	Xylt2
-0.3206	2.289	0.8936	Apob
-0.3205	2.902	0.5575	Hmgn3
-0.3203	3.025	0.5074	Tmem37
-0.3202	5.284	0.305	Cggbp1
-0.32	6.37	0.1889	Fes
-0.3198	4.778	0.2514	Rbx1
-0.3196	4.185	0.4232	Ufm1
-0.3195	6.053	0.1947	Snrnp200
-0.3191	5.393	0.2134	Khsrp
-0.319	4.435	0.3702	Slc25a13
-0.319	3.13	0.4813	E2f5
-0.3186	4.529	0.3653	Trim37
-0.318	5.341	0.2283	Nrbp1
-0.3172	4.185	0.4446	Msh6
-0.3171	4.016	0.4243	Degs1
-0.3169	3.1	0.5172	E430024P14Rik
-0.3168	5.928	0.2549	Zcchc24
-0.3167	11.36	0.5037	Ctsd
-0.3166	2.731	0.5668	Cyb5rl
-0.3165	5.005	0.3021	Ctnnbip1
-0.3163	5.391	0.2419	Ppm1f
-0.3162	3.957	0.4307	Stradb
-0.316	3.274	0.4728	Slc30a6
-0.3159	3.174	0.4931	Mfsd4b4
-0.3152	6.95	0.1486	Tmed10
-0.3151	2.948	0.5374	A930024E05Rik
-0.315	6.112	0.1682	G3bp1
-0.315	4.664	0.2996	Ccdc127
-0.3149	4.035	0.5018	Pus7
-0.3146	4.666	0.2806	Cox7c
-0.3145	8.154	0.3466	Npc2
-0.3145	2.555	0.6934	Sox13
-0.3141	4.244	0.3731	Obi1
-0.314	4.8	0.5389	Psma1
-0.3135	3.339	0.5793	Jmjd8
-0.3132	5.637	0.2117	Gm7072
-0.3132	4.292	0.3574	Pak1ip1
-0.3132	3.084	0.55	Spata5l1
-0.3131	2.996	0.5679	5430403G16Rik
-0.313	3.37	0.5319	4930453N24Rik
-0.3128	4.507	0.5841	Eps8
-0.3127	3.981	0.4188	Gm15850
-0.3123	6.126	0.1917	Ap1s2
-0.3122	5.148	0.2266	Pgrmc2
-0.3122	3.74	0.4022	Hmgcr
-0.3121	5.598	0.1638	Mta2
-0.312	3.508	0.454	Hadh
-0.3118	4.459	0.4169	Dynlrb1
-0.3117	7.066	0.402	Rpl13a
-0.3115	2.833	0.5719	Josd2
-0.3114	2.785	0.5839	D17H6S53E
-0.3113	5.093	0.6034	Camk2n1
-0.311	4.986	0.3598	Grsf1
-0.3109	2.54	0.5714	Dph3
-0.3106	5.264	0.3175	Mknk2
-0.3106	2.781	0.5425	Tm2d3
-0.3104	4.437	0.3887	Ckap4
-0.3103	4.996	0.3294	Naa20
-0.3101	3.702	0.5272	Ebna1bp2
-0.3099	8.716	0.05064	Lcp1
-0.3099	9.723	0.1521	Selplg
-0.3099	4.839	0.3893	Uqcrc1
-0.3098	6.052	0.2175	Hsd17b12
-0.3098	2.646	0.5482	Naif1
-0.3095	6.787	0.197	Mapkapk2
-0.3091	4.518	0.3236	Dnajc19
-0.3091	2.61	0.5903	Alg3
-0.3089	7.026	0.2514	Atp6v0a2
-0.3088	4.676	0.2573	Fam50a
-0.3082	7.578	0.07553	Tspan7
-0.3082	3.875	0.5309	Klhl15
-0.308	3.659	0.5264	Prox2
-0.3079	5.564	0.1571	Trir
-0.3071	3.501	0.6674	Cep78
-0.307	4.364	0.3858	Stub1
-0.3067	3.612	0.4716	Srp19
-0.3066	7.101	0.1816	Sat1
-0.3063	5.233	0.2953	Eno1
-0.3061	7.201	0.09941	Hnrnpc
-0.3059	4.408	0.4994	Gpm6b
-0.3058	6.067	0.174	Arl6ip5
-0.3058	4.315	0.4557	Myd88
-0.3056	5.136	0.2806	Zfp110
-0.3054	6.428	0.1455	Ghitm
-0.3054	3.575	0.493	Il1r1
-0.3053	7.804	0.1616	Rasal2
-0.3053	5.836	0.2566	Ripk2
-0.305	7.369	0.1491	Ptma
-0.3048	5.784	0.2233	Abcd3
-0.3048	3.554	0.4631	Tomm22
-0.3047	6.636	0.1999	Sf3b2
-0.3047	4.453	0.3377	Snrpb2
-0.3047	3.084	0.509	Abitram
-0.3046	4.25	0.3385	Isca1
-0.3044	6.077	0.1765	Ctsf
-0.3043	5.849	0.2842	Tlr2
-0.3042	9.964	0.08541	Marcks
-0.3041	3.857	0.5433	Rrm1
-0.3036	2.614	0.6567	Tcta
-0.3034	5.458	0.2604	Akirin1
-0.3033	7.203	0.1132	Tmed7
-0.3033	4.787	0.3674	Mat2b
-0.3032	4.123	0.4538	Cdc14b
-0.3031	5.336	0.5591	Trp53cor1
-0.303	5.947	0.2807	Edem2
-0.3023	3.219	0.5561	Cep83os
-0.3023	3.251	0.6034	Rab29
-0.3022	3.002	0.5653	Tma16
-0.3019	3.101	0.5575	Zfp628
-0.3019	2.497	0.6599	Sap30
-0.3018	4.261	0.4449	Atp5h
-0.3015	5.348	0.2233	Actr1a
-0.3015	3.559	0.4824	Zfp422
-0.301	4.289	0.4577	Adrb1
-0.3007	2.479	0.6248	Pdcd2
-0.3007	2.647	0.6518	Snrpf
-0.3005	3.585	0.5074	Tmem201
-0.3003	3.621	0.6934	Dynlt2b
-0.3001	3.259	0.5309	R74862
-0.3	4.926	0.2817	Rabgef1
-0.2997	3.51	0.4538	Syne1
-0.2996	6.716	0.1156	Tmem30a
-0.2994	5.117	0.3732	Bmi1
-0.2993	3.519	0.5378	Smim4
-0.299	4.56	0.3059	Slc7a1
-0.2989	3.728	0.5264	Ngdn
-0.2988	4.007	0.4552	Pigm
-0.2986	6.895	0.1224	Ap2b1
-0.2985	4.938	0.3308	Rer1
-0.2981	4.026	0.3913	Polr1d
-0.2978	4.908	0.2944	Rab32
-0.2978	7.886	0.2984	Rhob
-0.2977	4.274	0.3729	Tmem43
-0.2977	3.427	0.6282	Gm26839
-0.2974	6.106	0.2095	Vps37b
-0.2973	5.892	0.256	Cops4
-0.2973	4.927	0.3123	Vps29
-0.297	6.722	0.1765	Slc3a2
-0.2968	5.064	0.3294	Slc39a9
-0.2967	4.799	0.3175	Chmp5
-0.2966	3.323	0.5575	Ampd2
-0.2963	3.665	0.502	Fbxl14
-0.2962	3.992	0.4348	Polr2e
-0.2962	4.229	0.45	Ceacam1
-0.2961	5.257	0.3823	Pes1
-0.2961	2.496	0.6659	Mindy4
-0.2959	5.55	0.2201	Sash3
-0.2959	3.085	0.5856	Mrpl45
-0.2958	5.12	0.2975	Fam20b
-0.2955	5.473	0.2427	Gm44250
-0.2955	3.97	0.4386	Pdcl
-0.2954	6.191	0.2389	Ppp1r18
-0.2954	6.273	0.2813	Spcs3
-0.2954	2.981	0.5844	Hic2
-0.2953	4.917	0.3877	Gpr157
-0.2949	3.294	0.57	Lsm1
-0.2948	6.719	0.1393	Ociad1
-0.2948	4.598	0.3545	Fam3a
-0.2947	3.962	0.4537	Cd151
-0.2945	2.806	0.6631	Ddah2
-0.2944	2.843	0.7051	Kalrn
-0.2942	2.501	0.6427	Gnao1
-0.2941	4.898	0.3234	Gm16023
-0.294	4.362	0.3584	Cdc23
-0.2939	10.4	0.09928	Lrp1
-0.2939	7.537	0.1257	Pla2g15
-0.2939	5.717	0.2267	Nudt4
-0.2939	3.248	0.5417	Ndufb3
-0.2937	7.554	0.08541	Atf6
-0.2935	6.806	0.1265	M6pr
-0.2934	5.246	0.2645	Calm3
-0.2931	5.303	0.2862	Psmb1
-0.2931	3.579	0.5523	Atp5g3
-0.293	7.363	0.1481	Serinc1
-0.293	5.691	0.2105	Wbp2
-0.2926	5.702	0.2803	Cct8
-0.2921	4.381	0.3621	Aga
-0.2921	4.018	0.4178	Gstz1
-0.2921	3.681	0.5519	Sprtn
-0.2919	6.351	0.4007	Lsp1
-0.2915	4.793	0.3593	Gpr89
-0.2913	5.13	0.2704	Aamp
-0.2907	3.211	0.6182	Zfp719
-0.2905	5.114	0.3058	Cct7
-0.2905	4.261	0.3607	Vps28
-0.2903	3.535	0.5623	Dus2
-0.2902	6.109	0.1478	Gnai3
-0.2902	5.037	0.3799	Slc39a7
-0.2902	5.166	0.5066	Gm12353
-0.2901	3.405	0.4885	ENSMUSG00000120058
-0.2899	4.176	0.4027	Rab5if
-0.2895	7.49	0.1225	Eif4g1
-0.2895	3.766	0.4797	Sigmar1
-0.2893	2.996	0.5768	Dctd
-0.2891	4.347	0.3708	Hgsnat
-0.289	5.919	0.237	Ern1
-0.2889	3.578	0.4527	Zfp35
-0.2888	2.679	0.6771	Helq
-0.2881	7.166	0.1584	Spred1
-0.2881	8.006	0.2031	Tmbim6
-0.288	3.246	0.5427	Nob1
-0.2875	7.508	0.1126	Peak1
-0.2875	3.649	0.5249	Ndufv3
-0.2874	6.155	0.2223	Derl1
-0.2874	6.676	0.376	Ralgps2
-0.2873	2.286	0.6821	Trp53rka
-0.287	5.773	0.249	Icosl
-0.287	3.821	0.4538	Fibp
-0.2869	8.336	0.0813	Tpm3
-0.2869	3.159	0.5839	Nrm
-0.2868	5.126	0.3295	Ier3ip1
-0.2866	4.88	0.2842	Isoc1
-0.2866	4.367	0.3559	Thoc7
-0.2866	7.311	0.5261	Kpna1
-0.2866	2.89	0.5619	Ptgr1
-0.2865	3.418	0.5839	Gm19605
-0.2865	2.825	0.5859	Dhps
-0.2864	3.585	0.555	Dhcr7
-0.2864	2.619	0.5903	Plaat3
-0.2863	4.773	0.3667	Gsk3a
-0.2861	5.469	0.2231	Zdhhc3
-0.2858	3.386	0.527	4732440D04Rik
-0.2857	5.813	0.2019	Twf2
-0.2856	4.976	0.2898	Ikbkg
-0.2854	3.931	0.435	Nupl2
-0.2852	9.962	0.1478	Rapgef5
-0.285	4.921	0.2965	Myh10
-0.2848	4.334	0.3893	Poglut1
-0.2848	4.692	0.4796	Ctdsp1
-0.2846	2.903	0.5906	Gfus
-0.2845	3.713	0.4785	Gucd1
-0.284	6.35	0.2175	Mfsd1
-0.284	5.355	0.2828	Nbeal2
-0.284	3.831	0.4607	Mlycd
-0.2839	12.15	0.1884	mt-Rnr2
-0.2836	6.1	0.1825	Amfr
-0.2836	4.761	0.423	Zbtb7b
-0.2834	5.233	0.3615	Pcyt1a
-0.2833	5.482	0.4766	Cox4i1
-0.2831	2.94	0.6017	Gm27003
-0.283	3.852	0.4661	Fcf1
-0.2829	3.877	0.5067	A730081D07Rik
-0.2828	4.818	0.3442	Csnk1g2
-0.2828	2.633	0.6778	Ccdc112
-0.2822	3.43	0.5577	Taf10
-0.282	4.433	0.4376	Emc10
-0.2819	6.8	0.2817	Pals2
-0.2819	5.359	0.382	Ppm1g
-0.2817	2.769	0.6518	Akr7a5
-0.2813	6.008	0.2584	Afap1l1
-0.2813	5.347	0.2842	Srsf9
-0.2813	4.425	0.4742	Ric3
-0.2811	5.547	0.3772	Kcnj2
-0.281	7.807	0.3053	Sfmbt1
-0.281	4.387	0.4672	Ubxn2b
-0.2808	7.85	0.1197	Tnfrsf11a
-0.2805	5.151	0.3607	Taldo1
-0.2805	3.817	0.4902	Tlr12
-0.2805	4.182	0.4904	Tnfsfm13
-0.2804	3.92	0.4225	Brms1
-0.2804	4.08	0.4933	Gatc
-0.2804	3.361	0.4938	Rrp15
-0.2801	4.759	0.4205	Golt1b
-0.28	6.639	0.1447	Rdx
-0.28	6.062	0.2105	Zbtb7a
-0.28	6.943	0.2523	Tm6sf1
-0.2793	6.009	0.2021	Clptm1
-0.2791	4.856	0.3257	BC004004
-0.2791	5.152	0.3377	Crat
-0.279	3.501	0.6408	Gm49339
-0.2787	3.629	0.5311	Cd46
-0.2787	2.57	0.6821	Zfp825
-0.2786	3.334	0.5793	Med4
-0.2784	4.463	0.4422	Bcl7b
-0.2783	3.88	0.4305	Fh1
-0.278	3.62	0.5245	Zfp386
-0.2779	3.314	0.5092	Ptpmt1
-0.2778	3.639	0.4959	Cyb5d2
-0.2778	3.201	0.6101	Nelfe
-0.2774	5.174	0.2968	Aldh3a2
-0.2774	5.051	0.3525	Pdap1
-0.2773	7.955	0.187	Tjp1
-0.2769	3.643	0.5306	Slc25a39
-0.2768	3.361	0.5249	ENSMUSG00000121479
-0.2768	3.525	0.5379	Snrpc
-0.2767	5.938	0.1952	Rrp1
-0.2764	3.709	0.4994	Ap2s1
[truncated: 55,011 more rows]

## Sheet: DE-IRM
logFC	AveExpr	p_val_adj	gene_names
-4.801	3.972	0.001477	Gm47283
-3.592	6.219	9.553e-10	Nrxn1
-3.541	2.802	0.1032	Pianp
-3.141	4.759	0.004636	Magi2
-2.985	3.378	0.0001967	Cd36
-2.628	5.56	2.086e-05	Nme7
-2.426	5.834	1.151e-06	Cmtm8
-2.415	5.21	8.039e-06	Sfmbt2
-2.27	9.659	4.151e-11	Arsb
-2.042	6.252	0.3322	Nhs
-2.035	6.181	0.02341	Cd300lf
-2.008	4.279	0.4519	Slc15a2
-1.919	5.081	0.01029	Qsox1
-1.892	7.09	0.2809	Gatm
-1.776	4.878	0.5808	Msh5
-1.729	5.873	2.057e-05	Ubc
-1.667	4.796	0.003373	Alox5
-1.624	4.669	0.3462	Gm11867
-1.52	4.036	0.01457	Hmga2-ps1
-1.511	6.218	0.3037	Colec12
-1.488	3.67	0.04785	Gm55604
-1.45	5.689	0.01457	Igsf8
-1.324	4.488	0.03132	Nectin2
-1.287	4.183	0.03794	Gm10138
-1.287	3.649	0.04547	Atp5md
-1.268	7.708	0.0002857	Xpr1
-1.268	5.791	0.004609	Gm49342
-1.263	3.852	0.09967	Ccdc62
-1.252	3.86	0.1678	Nr4a1
-1.249	6.4	0.01846	Srgn
-1.245	8.056	0.4412	Cacna1a
-1.231	4.197	0.05554	Trib1
-1.223	3.535	0.06915	Prdx3
-1.22	4.063	0.1025	Klf2
-1.217	3.807	0.03954	Ndufb7
-1.215	6.377	0.2064	Jun
-1.2	3.561	0.1673	Cstb
-1.199	3.931	0.1887	Rasgrp4
-1.19	4.743	0.01957	Arf6
-1.187	5.947	0.04419	Fads1
-1.186	5.984	0.006625	Rpl11
-1.178	3.742	0.2248	Rpl27
-1.173	3.966	0.06915	Ubl5
-1.165	6.985	0.2038	Il1a
-1.162	3.809	0.06172	Selenon
-1.145	4.552	0.04547	Fcgrt
-1.143	5.351	0.01846	Pcna
-1.134	5.314	0.251	Ifitm3
-1.128	5.201	0.01889	Manf
-1.102	4.142	0.06373	Acvrl1
-1.102	4.954	0.5693	Fos
-1.086	3.962	0.1044	Cdk5r1
-1.083	4.707	0.03954	Irf2bpl
-1.082	13.02	0.09777	Lars2
-1.081	3.858	0.162	Gm33100
-1.079	4.717	0.02782	Paics
-1.078	4.466	0.06076	Phyh
-1.076	4.264	0.04419	Zfp513
-1.061	3.414	0.2119	C1qbp
-1.053	4.95	0.08861	1700025G04Rik
-1.042	5.355	0.01896	Zfp729a
-1.039	5.943	0.05693	Ubb
-1.038	4.76	0.07357	Sdf2l1
-1.034	4.018	0.07713	Tuba1a
-1.03	4.07	0.08802	5033421B08Rik
-1.029	4.843	0.04259	Rpl28
-1.029	3.582	0.1877	Fzd4
-1.025	4.363	0.06172	Pter
-1.019	6.311	0.004609	Hsp90aa1
-1.019	6.86	0.01175	Fgl2
-1.019	5.387	0.04547	Ppia
-1.018	4.322	0.07713	Pnp
-1.012	3.914	0.151	Rpl27a
-1.009	3.847	0.09211	Patl2
-1.005	5.436	0.09762	Amotl1
-0.999	9.303	0.1678	Gm15564
-0.9958	3.743	0.128	Prelid1
-0.9953	3.607	0.2262	Hypk
-0.9923	4.499	0.05546	Tagln2
-0.9907	5.783	0.3781	Atf3
-0.9897	4.342	0.06707	Btf3
-0.9888	4.126	0.1111	Mcm6
-0.9838	3.766	0.1532	Ndufb8
-0.9791	3.588	0.2334	Ppp1r18os
-0.9753	6.419	0.006625	Sfi1
-0.9739	5.708	0.06534	Rpsa
-0.9719	5.306	0.02729	Prickle1
-0.9687	4.162	0.5496	Dusp1
-0.9649	4.19	0.2603	Il7r
-0.9629	5.34	0.04943	Rpl31
-0.9623	4.532	0.09525	Chic1
-0.9605	5.524	0.01554	Gpx1
-0.9599	6.112	0.04904	Rps29
-0.9553	3.779	0.1128	Lig1
-0.9502	6.512	0.01491	Actg1
-0.9502	3.686	0.3307	Map3k19
-0.9477	6.365	0.04954	Rps3
-0.9468	5.155	0.03132	Mlf2
-0.9456	6.526	0.06452	Bcl2
-0.943	5.926	0.05469	Rpl10
-0.9429	11.62	0.004733	Cst3
-0.9406	4.424	0.07713	Midn
-0.9362	4.776	0.05932	Bzw2
-0.9357	4.191	0.1283	Psmb4
-0.9345	3.945	0.1744	Plpp3
-0.9273	6.077	0.1354	Rplp0
-0.9267	3.709	0.2725	BC031181
-0.9262	4.041	0.26	Atp6v1f
-0.9261	4.651	0.05546	Sptssa
-0.9231	4.212	0.1429	Nifk
-0.9208	9.376	0.03424	Filip1l
-0.9146	8.274	0.05546	Hspa5
-0.9142	4.859	0.08827	Sgip1
-0.9125	5.66	0.03954	Cct6a
-0.9108	4.542	0.1286	Tmem100
-0.9106	5.005	0.1316	Lypd6
-0.9089	4.27	0.07913	Bcas2
-0.9078	4.095	0.1539	Ninj1
-0.907	4.308	0.3239	Ran
-0.9058	3.834	0.2016	Tuba1c
-0.9013	4.945	0.1087	Grsf1
-0.8985	6.102	0.01539	Lman1
-0.8971	4.279	0.09905	Elovl1
-0.893	6.314	0.06335	Gbp7
-0.8911	5.541	0.05546	Cd14
-0.8893	4.109	0.1423	Cd276
-0.8877	6.984	0.01846	Pdia6
-0.8774	6.502	0.009128	Alox5ap
-0.8774	4.257	0.4946	Ppp1r15a
-0.8766	6.962	0.01457	Tspan18
-0.8754	5.071	0.08927	Arrdc3
-0.8753	4.434	0.1497	Cox6a1
-0.8743	5.641	0.0523	Drg1
-0.8716	3.943	0.1855	Otud1
-0.8714	4.85	0.2173	Ostc
-0.8708	5.193	0.1108	Ier5
-0.8675	3.839	0.2059	H1f0
-0.8657	4.354	0.1423	Ugdh
-0.8609	3.57	0.2064	Ormdl3
-0.8587	5.707	0.01846	Spg20
-0.8581	4.131	0.1352	Plscr3
-0.8574	6.467	0.05099	Rplp1
-0.856	4.998	0.1269	Tuba1b
-0.8548	4.672	0.1025	Aga
-0.8539	3.742	0.1632	Slc16a1
-0.8532	5.147	0.04547	Xrcc5
-0.8531	3.798	0.2055	Gpr35
-0.8529	5.95	0.02305	Ptbp1
-0.8516	5.859	0.07713	Rpn1
-0.8516	4.005	0.1918	Sod1
-0.8494	8.622	0.0008906	Rnase4
-0.8489	5.24	0.06387	Pcyox1
-0.8488	5.259	0.1105	Nhsl2
-0.8478	6.859	0.02048	Rps4x
-0.846	6.43	0.02044	Evi2a
-0.8426	4.131	0.1759	Clec4a2
-0.8421	4.991	0.06387	Psmd12
-0.8415	5.765	0.1429	Ppp1r10
-0.8411	3.817	0.22	Rpp14
-0.8394	5.986	0.01889	Tgm2
-0.8381	4.21	0.1912	Gm42962
-0.8375	6.559	0.01228	Naalad2
-0.8366	6.661	0.01457	Tspan13
-0.8352	4.793	0.06733	Nxt2
-0.8332	5.874	0.07936	Furin
-0.8325	8.316	0.005501	Ccr5
-0.8314	3.929	0.2293	Ubxn6
-0.8304	4.134	0.1154	Wdr5
-0.8298	4.093	0.193	Ets2
-0.8226	4.554	0.1841	Lbh
-0.8211	5.8	0.1672	Rpl8
-0.8196	4.474	0.1415	Slc30a4
-0.8183	4.547	0.4562	Ifi27l2a
-0.8173	4.317	0.1679	Ssr2
-0.8159	14.73	0.04789	Cmss1
-0.815	4.667	0.1338	Lfng
-0.8098	5	0.1065	Naaa
-0.8086	4.455	0.2018	Gm49368
-0.8085	4.237	0.1429	Arhgap27os3
-0.8064	3.872	0.5149	Egr1
-0.8051	4.938	0.09607	Eef1d
-0.8047	8.666	0.0004828	P2ry13
-0.803	4.228	0.2281	Cstf2
-0.8028	5.09	0.2182	Isg15
-0.8024	5.21	0.1425	Tob2
-0.8018	6.114	0.06809	Rps5
-0.8016	4.926	0.1474	Sox4
-0.8008	5.629	0.05071	Gngt2
-0.7958	5.344	0.04547	Hsbp1
-0.7956	4.392	0.6709	Fosb
-0.7944	5.426	0.7371	Ccr6
-0.7927	6.586	0.02044	Fam111a
-0.7927	4.172	0.2406	Epha2
-0.7921	3.968	0.1927	Mt1
-0.7909	4.409	0.162	Ctdnep1
-0.7897	4.16	0.1631	Ndufa4
-0.789	3.834	0.1834	Aip
-0.7881	4.685	0.1105	Dnajb1
-0.7866	6.372	0.02616	Selenof
-0.786	5.037	0.1532	Zyx
-0.7848	5.041	0.1376	Rpl35a
-0.784	4.43	0.1678	Tmem167b
-0.782	6.036	0.08105	Rpl13
-0.7807	8.086	0.006983	Hspa8
-0.7807	7.58	0.3867	Bank1
-0.7785	3.739	0.3563	Tmsb10
-0.7778	6.171	0.03061	Psme1
-0.7769	3.589	0.3161	Ybx3
-0.7755	6.997	0.2291	Slc2a5
-0.7752	6.126	0.04954	Bst2
-0.7724	4.091	0.1672	Srp9
-0.7722	4.385	0.124	Rabac1
-0.7707	3.903	0.206	Stk35
-0.7704	5.902	0.02765	Arpc3
-0.7673	3.874	0.2331	Crem
-0.7666	3.918	0.2064	Tbl2
-0.766	3.818	0.2458	Dkc1
-0.7658	4.788	0.1884	Jund
-0.7614	7.769	0.04259	Ddx3x
-0.7601	4.181	0.2216	Slc30a1
-0.7585	4.61	0.1884	Afap1
-0.7583	4.864	0.1369	Prkcq
-0.7581	6.323	0.06488	Rpl17
-0.7577	4.674	0.1283	Cebpb
-0.757	4.436	0.1445	Slc25a11
-0.756	5.036	0.177	Marcksl1
-0.7558	3.95	0.1786	ENSMUSG00000121141
-0.7553	7.286	0.6116	Rn7sk
-0.7551	6.665	0.04547	Tlr3
-0.753	7.769	0.01846	Fcgr2b
-0.7517	6.115	0.03061	Pcbp1
-0.7509	5.599	0.1011	Zkscan1
-0.7498	6.279	0.04029	Rpl5
-0.7491	3.784	0.3712	Ginm1
-0.7488	4.092	0.193	Ufm1
-0.7461	4.889	0.1082	Hat1
-0.7457	4.572	0.1124	Adh5
-0.7449	4.23	0.1672	Sod2
-0.7444	5.474	0.04789	Hhex
-0.7437	5.728	0.06335	Gabarap
-0.7434	4.772	0.1682	Tmed4
-0.7433	3.695	0.3171	B4galnt1
-0.742	4.866	0.1541	Slbp
-0.742	4.325	0.2669	Bcl2a1a
-0.7419	4.413	0.1506	Afdn
-0.7407	5.119	0.1426	Prkab1
-0.7407	5.487	0.5055	Rps12
-0.7387	5.762	0.169	Rps27a
-0.7384	3.79	0.2439	Foxred1
-0.7378	4.315	0.2194	Arhgap29
-0.7368	3.579	0.4609	Cfap43
-0.7366	5.028	0.1328	Clec4a3
-0.7365	3.844	0.26	Imp4
-0.7352	4.485	0.2149	Nedd8
-0.7325	4.159	0.2009	Arhgef3
-0.7324	5.662	0.04954	Rps19
-0.7323	5.361	0.05546	Tram2
-0.7321	3.931	0.2839	Gclm
-0.7319	6.061	0.1654	Ckb
-0.7311	6.431	0.1212	Serp1
-0.7309	3.872	0.2669	Eif3i
-0.7308	5.975	0.06685	Mtpn
-0.7302	4.917	0.1568	Sfr1
-0.7298	5.459	0.1678	Rpl19
-0.7295	4.673	0.1237	Hdgf
-0.7294	4.005	0.2455	Eif2s3x
-0.7285	4.585	0.1532	Psmb10
-0.7285	6.148	0.192	Rplp2
-0.728	9.251	0.007792	Hsp90b1
-0.7273	3.61	0.4151	Rnaseh2b
-0.7269	5.75	0.08827	Hyou1
-0.7262	3.923	0.2107	Flot2
-0.7259	4.317	0.1762	Yeats4
-0.7241	5.8	0.04733	Cct8
-0.7226	5.958	0.08334	Tpt1
-0.7217	3.88	0.2396	D8Ertd738e
-0.7205	3.929	0.216	Acads
-0.7198	4.053	0.5746	Ccrl2
-0.7192	4.813	0.1568	Arl5b
-0.7189	11.31	0.003802	Actb
-0.7186	4.207	0.4415	Nelfb
-0.7181	5.974	0.06733	Calu
-0.7178	4.808	0.1532	Scp2
-0.7169	6.644	0.1283	Coro1a
-0.7161	4.64	0.1316	Rnf34
-0.7159	4.029	0.4703	Dab2
-0.7153	4.358	0.1877	Tmem109
-0.7148	3.909	0.2413	Srp54c
-0.7147	5.566	0.1337	Rpl12
-0.7137	4.828	0.22	Rpl36a
-0.7136	5.191	0.2449	Rps15
-0.7134	4.846	0.7446	Ccl3
-0.7133	4.581	0.3496	4933421O10Rik
-0.7132	3.965	0.2759	Mttp
-0.712	4.574	0.1927	Cox7c
-0.7116	8.316	0.01846	Ssbp2
-0.7094	3.916	0.2759	2410002F23Rik
-0.7093	3.843	0.3161	Socs3
-0.7083	5.558	0.1388	Mrfap1
-0.708	6.001	0.06824	Rpl26
-0.708	3.956	0.356	Polr3k
-0.7054	3.121	0.6602	Ildr1
-0.7043	5.851	0.1912	Gas6
-0.704	5.643	0.1107	Cse1l
-0.7035	4.075	0.2439	Tnfsfm13
-0.7021	6.726	0.02769	Prpf8
-0.7019	10.23	0.002305	Selenop
-0.7014	7.71	0.01029	Hnrnpk
-0.6992	4.247	0.2886	Dynlrb1
-0.6991	16.94	0.08827	Rn18s-rs5
-0.6987	6.309	0.06172	Set
-0.6985	4.777	0.2064	Cited2
-0.6981	4.542	0.1789	Golt1b
-0.698	6.98	0.01175	M6pr
-0.6978	4.945	0.2064	Hspe1
-0.6974	4.16	0.2669	Cass4
-0.6963	3.379	0.4029	1600012H06Rik
-0.6952	4.234	0.3276	H2az1
-0.6951	4.474	0.2013	Thrb
-0.695	4.127	0.2471	Pak1ip1
-0.6947	7.039	0.04236	Lrrc3
-0.6945	3.647	0.408	3110009E18Rik
-0.6937	4.654	0.188	Btbd3
-0.6928	4.831	0.1717	Rpl18
-0.6925	4.193	0.22	Nfkbib
-0.692	6.176	0.06057	Tmem86a
-0.6918	3.575	0.3645	Gm54867
-0.6914	6.573	0.09615	Rpl18a
-0.6913	7.716	0.08165	Tyrobp
-0.6899	4.901	0.1497	Chmp5
-0.6896	5.947	0.07713	Dnajb11
-0.6895	6.009	0.3309	Rpl32
-0.6875	6.244	0.07966	Rpl14
-0.687	4.735	0.1928	Psmd8
-0.6865	5.804	0.3161	Rpl41
-0.6861	4.147	0.2513	Alg1
-0.6847	4.533	0.1887	Kdr
-0.6845	7.194	0.03981	Pea15a
-0.6823	6.67	0.05293	Gpr183
-0.6815	7.832	0.01175	Fcgr1
-0.6813	5.69	0.1931	Rps7
-0.6808	5.725	0.3322	Rps24
-0.6801	3.857	0.2669	Rpl15
-0.6793	5.176	0.1032	Myl12a
-0.6791	6.971	0.04943	Evi2
-0.6791	5.985	0.06634	Cd52
-0.6782	5.526	0.1369	Snx17
-0.6771	4.819	0.1654	Stk38l
-0.6764	7.332	0.09857	Aif1
-0.6764	5.058	0.2134	Mdh1
-0.6764	4.201	0.2907	Eid1
-0.6762	4.784	0.1632	Eif4a3
-0.6761	5.054	0.1927	Tnfrsf13b
-0.6757	5.183	0.1801	Dnajb9
-0.6757	4.055	0.2178	Tmem250-ps
-0.6752	6.278	0.1453	Ccl12
-0.6748	5.215	0.2466	Dnajb4
-0.6737	4.162	0.2735	Glce
-0.6733	9.948	0.01674	Tmsb4x
-0.6731	7.063	0.05293	Pfn1
-0.6719	8.618	0.04954	Calr
-0.6713	10.19	0.006983	P2ry12
-0.6713	4.153	0.2228	Gabarapl2
-0.6704	4.206	0.2604	Adrb1
-0.6702	6.348	0.07973	Hnrnpab
-0.6699	6.383	0.1429	Rps23
-0.6699	4.672	0.2308	Rpl38
-0.6691	5.691	0.124	Ppib
-0.6686	5.056	0.1789	Smu1
-0.6677	7.641	0.02044	Calm1
-0.6677	6.54	0.06125	Rpn2
-0.6655	6.124	0.0965	Rack1
-0.6655	5.316	0.1426	Rps13
-0.6653	6.575	0.06733	Arf4
-0.6653	4.475	0.2364	Fam217b
-0.6651	5.84	0.1654	Rps11
-0.6649	4.997	0.2073	Rps17
-0.6644	3.953	0.2635	Brix1
-0.6642	8.992	0.06452	Pdia3
-0.6637	3.95	0.2573	Psmf1
-0.6627	4.708	0.3111	Myd88
-0.6622	5.408	0.1532	Rpl24
-0.662	6.561	0.05408	Spcs2
-0.6617	4.109	0.2182	Utp3
-0.6614	4.157	0.2557	Pqbp1
-0.6609	4.353	0.2268	Zfp472
-0.6606	4.378	0.2319	Gga2
-0.6595	5.852	0.08733	Gnb2
-0.6589	4.25	0.24	Nsun3
-0.6585	5.47	0.1927	Junb
-0.6585	4.255	0.2498	Cox7b
-0.6583	4.182	0.2455	Cebpzos
-0.6576	4.86	0.1678	Cd302
-0.6574	4.999	0.1408	Psma1
-0.6573	7.132	0.04954	Ifit3
-0.6556	5.508	0.2268	Ctnnd2
-0.6553	10.26	0.4456	C1qa
-0.6546	3.976	0.2365	Ckap4
-0.6545	4.924	0.5352	Cd244a
-0.6544	4.205	0.235	Gm20528
-0.6544	3.631	0.3423	Polr2e
-0.654	6.378	0.3839	Rps8
-0.6533	7.296	0.05048	Txnip
-0.6505	6.139	0.2155	Pja2
-0.6503	4.358	0.2268	Klk8
-0.6478	4.714	0.1789	Tmem214
-0.6478	3.617	0.3945	Tada3
-0.6472	5.113	0.226	Tcp1
-0.6455	4.183	0.2785	Dda1
-0.6451	3.671	0.377	Rpl22l1
-0.6435	6.015	0.08583	Ddx21
-0.6431	4.935	0.7203	Ccl4
-0.6429	4.087	0.2541	Tsen34
-0.6427	5.45	0.2119	Rpl9
-0.6415	6.529	0.1568	Zfand5
-0.6406	5.898	0.3653	Rhbdd1
-0.6401	3.905	0.2909	Slc46a1
-0.6395	4.151	0.4343	Kcnj10
-0.6389	4.565	0.22	Pdha1
-0.6385	6.594	0.09379	Cd34
-0.6369	4.103	0.313	Rmdn3
-0.6368	8.012	0.02044	Rin2
-0.6359	4.405	0.2378	Nme2
-0.6353	5.547	0.1918	Rpl22
-0.6353	3.971	0.2498	Idh3a
-0.6349	6.687	0.09762	Dusp6
-0.6337	6.834	0.04852	P4hb
-0.6332	8.913	0.1927	Ly6e
-0.6326	4.509	0.3437	Rpl36
-0.6311	3.451	0.6253	Tlcd2
-0.6307	4.966	0.2181	Ssr4
-0.6298	7.323	0.06076	Arhgdia
-0.6281	8.413	0.03351	Hsp90ab1
-0.6277	5.288	0.1877	Rps20
-0.6273	4.224	0.2589	Dipk2a
-0.6264	6.946	0.1107	Tlr13
-0.6263	6.221	0.1646	Flna
-0.6255	5.209	0.1357	Ssrp1
-0.6255	3.976	0.3382	Degs1
-0.6254	5.597	0.5951	Rgs1
-0.6253	5.448	0.1328	D130009I18Rik
-0.6249	3.91	0.3462	Mcc
-0.6248	4.476	0.1927	Gpam
-0.6246	5.518	0.1294	Tmco1
-0.6229	4.57	0.2593	Paqr3
-0.6218	4.817	0.2752	A630089N07Rik
-0.6217	3.862	0.415	Gpr137
-0.6215	5.41	0.1429	Psmd4
-0.6204	4.316	0.2669	Rab5if
-0.6202	3.909	0.3322	Phax
-0.6202	3.779	0.3341	Slc48a1
-0.6196	6.052	0.1571	Btg1
-0.6193	5.062	0.1759	Zmym3
-0.6177	4.319	0.3037	Hdhd2
-0.6161	5.096	0.1931	Adk
-0.6153	3.715	0.4454	Zfp770
-0.6145	5.535	0.193	Nras
-0.6142	3.825	0.3489	Snrpa1
-0.6138	5.004	0.2725	Clic4
-0.6133	4.545	0.204	Edf1
-0.6125	4.436	0.3026	Coq10b
-0.612	4.441	0.2609	Ebag9
-0.6119	4.25	0.24	Atxn7l3
-0.61	5.439	0.1365	Mid1ip1
-0.6088	4.194	0.2669	Gnl3l
-0.6087	6.6	0.06824	Ghitm
-0.6079	4.385	0.3839	Eif3m
-0.6073	6.549	0.06452	Selenot
-0.6072	4.011	0.4013	Mzt2
-0.6071	4.626	0.2458	Vbp1
-0.6065	4.745	0.2586	Gm21988
-0.6064	7.968	0.01846	Tnfrsf21
-0.6064	5.334	0.1682	Ifi30
-0.6064	4.655	0.1968	Eaf1
-0.6047	5.601	0.1692	Kxd1
-0.6043	5.278	0.1382	Tsn
-0.6037	4.671	0.2365	Cbx4
-0.6036	4.308	0.3765	Prox2
-0.6035	5.085	0.1696	Atrip
-0.5997	4.316	0.3682	Gmeb2
-0.599	4.999	0.2759	Calm3
-0.5987	5.107	0.1759	Dennd2c
-0.5979	4.007	0.4429	Ccnc
-0.5976	7.367	0.478	Hpgd
-0.5975	9.455	0.02361	Tmem119
-0.5965	5.629	0.1679	Gars
-0.5961	4.455	0.2686	Ppp2cb
-0.5957	6.313	0.07869	Plod1
-0.5956	5.908	0.5197	Zfp36
-0.5949	11.47	0.1673	Gphn
-0.5942	7.209	0.07357	Tmed10
-0.5941	5.042	0.1795	Psma7
-0.5941	4.659	0.4981	Rps16
-0.594	7.97	0.01768	App
-0.5937	5.247	0.2279	Atrnl1
-0.5932	5.005	0.1746	Lactb
-0.5925	5.918	0.1105	Xbp1
-0.5923	4.876	0.169	Dld
-0.5923	5.682	0.1966	Rps27
-0.5911	7.204	0.04254	Ogfrl1
-0.5902	5.701	0.1105	Dstn
-0.5898	4.376	0.2513	Zfp281
-0.5889	4.042	0.2863	Gatc
-0.5887	3.369	0.5129	Atp5d
-0.5885	4.463	0.2735	Emc7
-0.5884	4.876	0.2593	Rpl35
-0.5876	7.341	0.07231	Garnl3
-0.5876	6.204	0.07869	Dazap2
-0.5866	6.073	0.1748	Reep5
-0.5865	5.256	0.1885	Tspan31
-0.5862	5.138	0.171	Selenok
-0.5855	8.335	0.04314	Eif4g2
-0.5855	5.054	0.22	Adrb2
-0.5853	4.251	0.2807	Eif3g
-0.5852	4.497	0.2689	Fam234b
-0.5842	5.494	0.1839	Cox4i1
-0.5831	6.868	0.04954	Ndfip1
-0.583	5.992	0.3051	Dusp16
-0.5828	5.452	0.1622	Eif2s1
-0.5826	8.141	0.2686	Ftl1
-0.5823	4.449	0.3451	Nopchap1
-0.5821	5.131	0.3287	Got1
-0.582	5.107	0.171	Ube2q1
-0.5815	3.491	0.4664	Ormdl2
-0.5812	4.258	0.2864	Armc5
-0.581	4.369	0.3532	Rpl39
-0.5803	5.284	0.1931	Psmb1
-0.5798	4.228	0.3373	Fan1
-0.5794	5.501	0.1423	Sars
-0.5786	5.176	0.2683	Pex2
-0.5785	7.586	0.1421	Rpl4
-0.5784	3.696	0.415	Chchd2
-0.5782	4.823	0.2626	Txndc5
-0.5775	3.596	0.4263	Ndufv3
-0.5764	8.304	0.03132	Ctsc
-0.5764	5.684	0.128	Sub1
-0.5756	6.631	0.1654	H3f3b
-0.5756	4.458	0.2798	Fam50a
-0.5754	6.293	0.1259	Vcp
-0.5753	6.062	0.1369	Hsd17b12
-0.5751	6.322	0.09525	Arpc4
-0.575	7.033	0.1233	Eif4a1
-0.5746	3.821	0.3945	Ndufb9
-0.5743	4.966	0.2376	Jpt1
-0.574	4.14	0.3319	Ube2m
-0.5737	6.384	0.2689	Pdia4
-0.5736	5.885	0.1429	Hspd1
-0.5736	6.004	0.1918	Ssr3
-0.5735	4.225	0.3238	Yipf3
-0.5734	4.643	0.24	Slc35b2
-0.573	5.183	0.4797	Gnb4
-0.5723	4.118	0.3154	Gtf2e1
-0.5722	5.067	0.233	Mbd3
-0.5719	3.69	0.4929	Il1rl1
-0.5717	4.576	0.2655	Agpat1
-0.5714	6.243	0.09607	Tmx4
-0.5708	6.744	0.6849	Rasgef1b
-0.5707	5.284	0.27	Tgif1
-0.5706	6.929	0.06452	Kpnb1
-0.5706	4.564	0.2562	Smim10l1
-0.5702	4.135	0.3211	Gm28035
-0.5696	4.976	0.1912	Metap1
-0.5692	8.969	0.03954	Canx
-0.5691	4.717	0.3066	Rps28
-0.5679	4.467	0.3111	Atic
-0.5679	4.423	0.3563	Polr2m
-0.5672	4.009	0.3653	Dpp3
-0.5669	6.119	0.1541	Spcs3
-0.566	6.417	0.1105	Sting1
-0.566	4.325	0.2984	Tprgl
-0.5654	7.814	0.04647	Rhoa
-0.564	6.045	0.1596	Tom1l1
-0.5629	5.758	0.1352	Lman2
-0.5622	3.502	0.5334	Hsdl2
-0.5618	3.732	0.415	Zbed3
-0.5608	4.749	0.3417	Jup
-0.5597	5.52	0.2912	Itpripl1
-0.5585	6.027	0.162	Zfp706
-0.5585	3.91	0.3629	Kcnip1
-0.5579	8.221	0.09615	Eef2
-0.5573	10.77	0.01175	Lgmn
-0.5567	5.136	0.233	Aamp
-0.5566	5.314	0.24	Snap29
-0.5564	6.002	0.1357	Slc25a5
-0.5563	6.489	0.1339	Sqstm1
-0.556	4.804	0.2669	Txndc12
-0.5552	5.417	0.193	Anp32e
-0.5552	4.582	0.2587	Prpf19
-0.555	8.234	0.03617	Cd53
-0.5549	6.865	0.08105	Tifab
-0.5543	3.979	0.3254	Mrpl39
-0.5532	3.926	0.4355	Etaa1
-0.5522	5.75	0.2633	Adora3
-0.5522	6.632	0.2659	Rps9
-0.5518	5.796	0.1369	Cbx1
-0.5512	4.549	0.2829	Vamp3
-0.5509	5.133	0.24	Plekhh2
-0.5508	5.418	0.1672	Khsrp
-0.5508	5.999	0.2059	Rps14
-0.5503	4.512	0.4643	Tmem176a
-0.5496	5.02	0.2824	Chmp1b
-0.5491	5.512	0.1761	Taldo1
-0.549	5.365	0.1884	Masp1
-0.5489	5.447	0.1934	Atp6v1g1
-0.5484	6.302	0.1208	Atp5a1
-0.5483	7.305	0.05057	Laptm4a
-0.5477	6.09	0.3155	Plekho2
-0.5474	3.784	0.415	Brms1
-0.5461	5.962	0.2809	Npm1
-0.5455	6.193	0.1423	Saraf
-0.5454	5.123	0.3237	Lst1
-0.5452	6.628	0.149	Klf7
-0.5442	4.638	0.3322	Psmd3
-0.5441	4.423	0.4263	Gpkow
-0.5437	5.991	0.1632	Spred2
-0.5425	4.592	0.3545	Park7
-0.5415	7.477	0.1238	Cd164
-0.5412	7.738	0.06634	Ncl
-0.5402	7.066	0.07001	Tmed7
-0.54	5.409	0.2216	Morf4l2
-0.5389	5.721	0.1536	Cnpy3
-0.5387	6.256	0.1779	Mfsd1
-0.5386	4.793	0.294	Wdtc1
-0.5386	4.006	0.4415	Ubl4a
-0.5379	6.091	0.1571	Etv1
-0.5377	6.258	0.1863	Ccnd1
-0.5366	4.397	0.3211	Scamp3
-0.5361	10.08	0.01457	Marcks
-0.5357	4.792	0.2552	Otub1
-0.5344	4.407	0.3644	Arpc5l
-0.5343	4.417	0.4321	Mcm3
-0.5339	4.749	0.3064	Rab32
-0.5336	3.756	0.5024	Gm16124
-0.5336	3.494	0.5535	H1f2
-0.5332	6.972	0.09029	Ybx1
-0.5329	5.424	0.1968	Prps2
-0.5326	3.864	0.4834	Tmx2
-0.5324	4.692	0.2924	Mtfr1l
-0.5323	4.892	0.3459	Zc3h12a
-0.5318	5.978	0.1613	Syngr2
-0.5318	4.939	0.2457	Psma4
-0.5316	5.598	0.2824	Rpl23a
-0.5316	4.752	0.2982	Pfdn5
-0.5314	4.907	0.2741	Ltc4s
-0.5312	5.725	0.1541	Atp5pb
-0.5311	3.696	0.543	Tomm6
-0.531	6.511	0.1746	Atp6ap1
-0.5309	5.424	0.1807	Uqcrc2
-0.5309	5.657	0.26	Rps6
-0.5308	5.525	0.2378	Ppp1r15b
-0.5307	9.193	0.1025	Jarid2
-0.5307	6.305	0.1329	Plod3
-0.5307	4.179	0.3913	Cnih1
-0.5295	4.343	0.3322	Nudt5
-0.5289	6.994	0.06733	Ctnnb1
-0.5284	4.387	0.319	Mpp1
-0.5276	6.48	0.1692	Nucks1
-0.5275	4.43	0.3334	Slc39a13
-0.5271	5.219	0.2073	Rpl10a
-0.5271	4.534	0.3137	Smim19
-0.527	5.599	0.1877	Actr1a
-0.5269	4.055	0.4892	Susd1
-0.5265	5.947	0.1698	Ano10
-0.5262	6.439	0.1663	Atp5b
-0.5249	6.359	0.1316	Stt3a
-0.5249	3.897	0.4627	Gtpbp10
-0.5247	4.066	0.3918	Ttbk2
-0.5246	4.033	0.4392	Fam53c
-0.5238	4.138	0.3943	Pdrg1
-0.5237	8.153	0.07913	Tmbim6
-0.5237	5.654	0.2457	Skp1
-0.5237	3.869	0.4438	Rbm43
-0.5236	4.577	0.3341	Ubqln4
-0.5233	4.845	0.2378	Acat1
-0.5227	4.761	0.3563	Vps11
-0.5215	5.169	0.3459	Gm5431
-0.5212	5.636	0.2996	Rpl37a
-0.5211	5.341	0.1928	Rps25
-0.5209	6.819	0.07713	Tmem59
-0.5205	5.372	0.1928	Cers2
-0.5196	5.355	0.1912	Spns2
-0.5187	3.849	0.4205	Zpr1
-0.5186	3.986	0.5055	Pilra
-0.5184	4.618	0.2586	Smarcd2
-0.518	4.188	0.4371	Loxl3
-0.5179	5.756	0.1912	Gm21970
-0.5179	4.435	0.2982	Polr1f
-0.5171	4.317	0.3726	Pxdc1
-0.5163	5.043	0.2705	Tpbgl
-0.5162	5.083	0.2707	Ppp1r7
-0.5162	4.481	0.3256	Errfi1
-0.5158	6.201	0.1504	Nfic
-0.5155	4.808	0.3715	Ercc6l2
-0.5154	4.041	0.4589	Fut11
-0.5152	4.155	0.3945	Adi1
-0.5144	6.621	0.1269	Cnbp
-0.5144	5.774	0.1918	Prdx1
-0.5142	6.493	0.1388	Commd8
-0.5139	4.884	0.2908	Tm7sf3
-0.5139	4.702	0.7692	Hlf
-0.5118	4.071	0.453	Pias3
-0.5117	3.876	0.4237	Hexim1
-0.5117	3.678	0.5062	Dctn3
-0.5113	5.431	0.2458	Fuca1
-0.5112	4.664	0.3475	Ptpn18
-0.5111	4.639	0.3148	Dusp7
-0.511	6.573	0.1698	Arl4c
-0.5108	4.01	0.4731	Fam98b
-0.5101	4.312	0.4177	Ndufc2
-0.5101	3.854	0.5296	Oard1
-0.5099	5.035	0.3943	Rps21
-0.5098	3.934	0.3997	Tm2d2
-0.5093	9.54	0.5559	Il31ra
-0.5091	5.07	0.3102	Eef1b2
-0.5083	6.03	0.3015	Epb41l3
-0.5083	4.043	0.3877	Faim
-0.508	4.155	0.415	Psmc4
-0.5074	4.077	0.3587	Cyc1
-0.5071	6.868	0.09408	Wdr1
-0.5063	7.576	0.1123	Cfl1
-0.5062	5.089	0.2262	Trim28
-0.5062	6.315	0.2394	Eif1
-0.506	4.651	0.4502	Dtd1
-0.5058	4.094	0.3811	Zkscan6
-0.5057	9.143	0.145	Grn
-0.5057	5.694	0.1927	Clptm1l
-0.505	4.583	0.3571	Ttpal
-0.5045	6.472	0.1415	Gal3st4
-0.5044	4.82	0.3734	ENSMUSG00000120081
-0.5042	4.625	0.2935	Tatdn2
-0.5042	6.842	0.2982	Ipcef1
-0.504	5.422	0.3671	Igtp
-0.5034	5.824	0.2722	Rpl37
-0.503	4.712	0.313	Nop56
-0.5025	4.53	0.304	Snapin
-0.5025	3.827	0.4834	Map2k3
-0.5021	5.192	0.2635	Rpl34
-0.5017	5.381	0.3296	Rps15a
-0.5017	6.383	0.439	Magt1
-0.5012	4.749	0.3134	Spg21
-0.5008	4.228	0.3781	Snrnp27
-0.4998	7.585	0.08971	Tor3a
-0.4994	5.378	0.3092	Ldha
-0.4993	7.197	0.1748	C3ar1
-0.4986	6.416	0.1746	Nova1
-0.4986	3.864	0.5314	Ppat
-0.4985	4.92	0.3635	Ublcp1
-0.4976	8.805	0.1687	Gpr34
-0.4976	5.834	0.5237	Btg2
-0.4964	4.46	0.3044	Mlh3
-0.4963	4.927	0.4682	Ap2m1
-0.4957	6.882	0.1789	Bsg
-0.4955	5.481	0.2042	Zfp646
-0.4954	7.433	0.09525	Mob1a
-0.4951	6.148	0.1934	Nod1
-0.4945	7.731	0.09607	Sdcbp
-0.4943	7.208	0.09029	Arpc1b
-0.4939	5.856	0.2638	Limd2
-0.4939	4.442	0.3971	Nsa2
-0.4934	8.615	0.06072	Glul
-0.4932	5.513	0.2557	4931406C07Rik
-0.4916	4.535	0.3306	Ints14
-0.4914	6.86	0.1339	Tlr4
-0.4914	5.671	0.296	Rpl6
-0.4914	6.507	0.3433	Rpl21
-0.4906	4.791	0.3842	Rps10
-0.4906	4.228	0.4389	ENSMUSG00000120396
-0.4904	5.371	0.3726	Eva1a
-0.4903	4.711	0.3671	Rhbdf2
-0.4902	4.554	0.4075	Tspo
-0.4901	7.418	0.1352	Ptma
-0.4895	4.734	0.4133	Slc7a5
-0.4894	5.018	0.2669	Rnf187
-0.4891	5.09	0.2755	Lin7c
-0.4882	7.325	0.1497	Ptms
-0.4872	6.801	0.233	Myo1b
-0.4864	6.018	0.2343	Ddb1
-0.4861	7.059	0.1549	Ttyh3
-0.4858	4.862	0.3467	Cracr2a
-0.4855	6.082	0.7959	Gm12865
-0.4853	4.367	0.3438	Tmem94
-0.4852	4.249	0.3545	Ints2
-0.4851	4.277	0.4363	Bhlhb9
-0.485	5.24	0.2562	Selenos
-0.485	3.562	0.6759	Prmt1
-0.4845	6.563	0.1611	Cpne3
-0.4844	8.353	0.05554	Cap1
-0.4842	5.474	0.2629	Pnrc2
-0.4839	5.36	0.2557	Cct3
-0.4838	4.982	0.311	Taf12
-0.4836	4.541	0.32	Arl14ep
-0.4835	4.09	0.4303	Nup210
-0.4831	5.116	0.3475	Ppp2r1b
-0.4825	6.083	0.1931	Naca
-0.4825	6.008	0.2025	Ipo5
-0.4823	5.999	0.2182	Surf4
-0.4821	6.716	0.1918	Etv5
-0.4821	5.278	0.2573	Txnl1
-0.4815	4.823	0.3166	Dck
-0.4812	5.03	0.3397	Slc39a10
-0.4807	6.55	0.1273	Ywhag
-0.4806	4.515	0.3945	Slc25a4
-0.4802	3.759	0.493	Hccs
-0.4794	4.969	0.3184	Hnrnph2
-0.479	4.987	0.3734	Mmp2
-0.4789	4.245	0.4516	Tomm20
-0.4778	5.431	0.2457	Dynll2
-0.4777	5.143	0.3084	Tspan3
-0.4776	6.189	0.2279	Dcakd
-0.4772	6.998	0.1698	Hcls1
-0.476	5.805	0.2394	Fuca2
-0.476	4.675	0.349	Cetn3
-0.4747	8.94	0.06387	Basp1
-0.4744	4.409	0.4119	Hgsnat
-0.474	5.23	0.2739	Manea
-0.4739	5.782	0.1746	Hspa12a
-0.4738	6.362	0.1568	Ssr1
-0.4738	3.685	0.6148	Gm37352
-0.4734	5.311	0.24	Cct5
-0.4733	6.704	0.3037	Tgoln1
-0.4729	3.922	0.4265	Get3
-0.4725	5.708	0.1968	Sec24c
-0.4723	5.481	0.2364	Nudc
-0.4722	8.424	0.0965	Trf
-0.4721	4.199	0.3818	Cox17
-0.4719	10.05	0.1123	Ubash3b
-0.4719	4.167	0.4263	Fam234a
-0.4717	4.712	0.415	Ctnnbip1
-0.4715	6.528	0.4929	Plcb2
-0.4704	5.334	0.2498	Uba2
-0.4703	3.842	0.5608	Osm
-0.4701	5.043	0.2786	Mgat2
-0.4699	3.583	0.6123	Aatk
-0.4697	4.647	0.3571	Arhgap9
-0.4697	4.542	0.4263	Sumo3
-0.4694	6.633	0.1154	Tmem30a
-0.4694	6.702	0.1453	Ociad1
-0.469	5.015	0.4229	Myh10
-0.4689	3.814	0.4609	Pnkd
-0.4686	4.192	0.4503	Ints11
-0.4686	8.761	0.655	Olfml3
-0.4684	7.572	0.1376	Itm2c
-0.4669	4.024	0.4794	Cstf1
-0.4668	5.127	0.2562	Hmgn1
-0.4666	5.259	0.3174	Cant1
-0.4662	3.777	0.5786	Tmtc2
-0.466	6.814	0.2907	Soat1
-0.4659	8.427	0.07447	Efhd2
-0.4655	5.07	0.6541	Ddit3 - ENSMUSG00000025408
-0.4651	6.621	0.1902	Eprs
-0.4648	4.919	0.3268	Tm2d1
-0.4644	6.674	0.1532	Stau2
-0.4643	4.068	0.4422	Gpx4
-0.463	6.367	0.1622	Azin1
-0.4627	7.349	0.1294	Mlec
-0.4624	4.673	0.3433	Topbp1
-0.4623	4.36	0.3828	Srebf1
-0.4616	8.299	0.1318	Gnai2
-0.4612	4.839	0.3504	Stard7
-0.4608	5.092	0.3134	Crat
-0.46	4.934	0.3459	Oaz1
-0.4597	6.328	0.4851	Mir142hg
-0.4594	4.665	0.4335	Fkbp4
-0.4593	4.332	0.4005	Bag3
-0.4588	4.227	0.5572	Me2
-0.4587	9.904	0.1654	Rapgef5
-0.4584	4.551	0.3629	Fis1
-0.458	4.291	0.5108	Crlf2
-0.4577	7.437	0.1013	Med12l
-0.4576	5.959	0.2378	Snrnp200
-0.4571	4.022	0.478	Zfp946
-0.4566	7.212	0.1453	Arl6ip1
-0.4566	6.01	0.6822	Setbp1
-0.4565	3.938	0.4931	Ormdl1
-0.4564	4.466	0.4013	Elac1
-0.4563	5.449	0.3398	Ddost
-0.4562	7.722	0.08685	Calm2
-0.4562	4.555	0.4377	Sgpp1
-0.4559	4.166	0.543	Ubqln2
-0.4555	5.002	0.302	Sart3
-0.4554	5.357	0.3154	Tmed9
-0.4553	3.126	0.8013	Cenpp
-0.455	5.932	0.2178	Hspa9
-0.4546	5.634	0.2686	Smim3
-0.4546	4.183	0.4363	Evi5l
-0.4543	5.142	0.5383	Gm12610
-0.4542	6.751	0.124	Morf4l1
-0.4537	4.05	0.4263	Vps4a
-0.4536	4.575	0.4031	Snrpb2
-0.4535	4.197	0.4412	Fntb
-0.4529	6.712	0.2877	Sgk1
-0.4524	3.996	0.4956	Spcs1
-0.4523	5.885	0.2487	Irf2bp2
-0.4523	3.884	0.5541	Msantd4
-0.452	5.638	0.2541	Zmpste24
-0.4519	3.858	0.4834	Chml
-0.4516	4.078	0.4512	Syngap1
-0.4514	4.809	0.6865	Rps26
-0.4513	5.524	0.3472	Cln8
-0.451	4.962	0.3629	Cope
-0.4506	6.601	0.2458	Ralgps2
-0.4503	6.349	0.1429	Clic1
-0.4503	4.271	0.4929	As3mt
-0.4503	3.759	0.5691	Gng5
-0.45	5.16	0.4971	Fhad1
-0.4497	8.155	0.06634	Fcgr3
-0.4497	5.42	0.3171	Txlna
-0.4491	4.77	0.415	Pdia5
-0.4491	4.474	0.4359	Prorp
-0.4487	8.505	0.1105	Cables1
-0.4487	4.434	0.4154	Tmed2
-0.4485	5.786	0.336	Ppp4r2
-0.4483	4.229	0.4774	Ifi27
-0.4483	3.664	0.5492	Napb
-0.4482	7.399	0.1568	Camk1
-0.4482	6.819	0.303	Rpl3
-0.4481	3.86	0.5582	Tnks1bp1
-0.4478	3.912	0.5117	Ccnyl1
-0.4478	4.243	0.5395	Smad6
-0.4477	4.571	0.3619	Cdk5rap1
-0.4464	9.326	0.04353	Ddx5
-0.4464	5.765	0.2161	Aco2
-0.4458	3.905	0.532	Icmt
-0.4456	6.913	0.3394	Rpl13a
-0.4454	10.14	0.1631	Lrp1
-0.4452	3.626	0.5395	Inpp1
-0.4443	5.724	0.2975	Abce1
-0.4439	3.741	0.6257	Rbm4b
-0.4438	4.152	0.4662	Mepce
-0.4438	3.806	0.5006	Pex6
-0.4436	5.425	0.3496	Ctnnal1
-0.4435	7.997	0.1546	Ehd4
-0.4433	4.117	0.4708	Anxa11
-0.4429	4.213	0.479	Eif1b
-0.4427	4.635	0.5306	Fcgr4
-0.4424	4.3	0.5314	Sde2
-0.4422	5.444	0.7109	Rpl7a
-0.442	6.614	0.1918	Mapre1
-0.4419	6.496	0.1761	Lrrc58
-0.4415	5.589	0.3727	Rpl7
-0.4413	6.26	0.3131	Ighm
-0.4412	4.7	0.3997	Smim15
-0.4407	6.706	0.1893	Slc3a2
-0.4406	6.643	0.1579	Ldhb
-0.4402	5.506	0.2458	Cct7
-0.4398	3.924	0.6083	Ddx54
-0.4394	4.143	0.5828	Strip1
-0.4393	7.186	0.162	Samsn1
-0.4391	9.318	0.6357	Eef1a1
-0.4386	5.274	0.3433	Ifit1
-0.4383	6.792	0.2146	Atp1a1
-0.4381	4.533	0.4433	Pgrmc1
-0.438	8.092	0.06824	Snx5
-0.438	5.837	0.3377	Nfkbia
-0.4377	7.753	0.1672	Rhob
-0.4377	6.536	0.2907	H2-T23
-0.4373	4.204	0.4334	Pdp2
-0.4368	8.613	0.1025	Rtn1
-0.4363	3.902	0.5062	Emg1
-0.4362	3.846	0.5056	Cox6b1
-0.4361	4.556	0.4167	Snrpd3
-0.4357	7.397	0.1111	Serinc1
-0.4356	5.907	0.2586	Abcd1
-0.4352	4.709	0.4797	Strap
-0.4351	7.713	0.1762	Gcnt1
-0.4351	5.755	0.2908	Hebp1
-0.435	6.502	0.1534	Slc9a1
-0.4347	5.651	0.4562	Rps18
-0.4342	6.345	0.1746	Zbtb18
-0.434	7.876	0.1337	Ywhae
-0.4331	10.35	0.07447	Sparc
-0.433	4.06	0.5044	Mrpl52
-0.4329	4.332	0.5118	Atf6b
-0.4327	8.33	0.1357	Ptgs1
-0.4324	5.113	0.4336	Ppp1ca
-0.4323	9.445	0.4886	Mir6236
-0.432	4.992	0.5106	Mpi
-0.4319	5.23	0.3545	Ilk
-0.4319	4.13	0.5314	Rhobtb2
-0.4317	5.318	0.3399	Psmd2
-0.4317	4.268	0.4392	Pigm
-0.4316	5.048	0.3986	Eif1a
-0.4314	11.74	0.3542	Camk1d
-0.4312	5.497	0.336	Sf3a1
-0.4312	4.207	0.4398	Cltb
-0.4312	4.252	0.544	St8sia4
-0.4309	6.493	0.4027	Gng10
-0.4294	4.886	0.5913	Rpl30
-0.4288	5.952	0.2822	Sp1
-0.4286	3.49	0.5808	Wscd1
-0.4275	5.672	0.2908	Smc3
-0.4271	3.995	0.4856	C1galt1c1
-0.427	6.087	0.3178	Nin
-0.4264	4.88	0.4812	Usp5
-0.4263	4.255	0.5109	Smc2
-0.4262	5.431	0.377	Endod1
-0.4261	4.202	0.5682	Mrpl24
-0.4259	5.221	0.3546	Ap2a1
-0.4258	10.15	0.1497	Psap
-0.4258	4.646	0.4719	Arpp19
-0.4257	3.687	0.5914	Gpr180
-0.4256	4.273	0.4714	Tor4a
-0.4251	5.457	0.2935	Myo1c
-0.4251	5.45	0.345	Sash3
-0.425	3.818	0.5055	Tmem179b
-0.4236	4.65	0.3682	Spg7
-0.4236	4.719	0.4363	Hfe
-0.4235	5.989	0.3188	Slc25a3
-0.4233	6.329	0.1918	G3bp1
-0.4231	4.205	0.4433	Usp50
-0.423	3.972	0.5733	H2bc4
-0.4228	4.813	0.3642	Slamf8
-0.4224	8.664	0.07737	Tln1
-0.4219	5.375	0.3114	Cwc22
-0.4219	6.474	0.3974	Creb5
-0.4217	4.596	0.422	Niban2
-0.4216	3.435	0.7772	Col25a1
-0.4204	5.516	0.3986	Man2a2
-0.4203	7.161	0.1504	Ywhaz
-0.4203	4.86	0.6295	Naa20
-0.4201	7.256	0.1571	Clta
-0.42	4.789	0.4123	Ap3m1
-0.42	4.441	0.488	Psip1
-0.4198	6.911	0.1687	Acp2
-0.4196	4.866	0.4562	Esrra
-0.4195	3.812	0.5325	Slc39a6
-0.4185	4.968	0.3475	Lyl1
-0.4177	5.833	0.3066	Cdc37
-0.4177	4.896	0.4336	Ppp5c
-0.4176	4.154	0.4715	Shkbp1
-0.4175	8.239	0.1466	Bin2
-0.4172	5.963	0.3037	Ndfip2
-0.4171	5.503	0.3691	Tagap
-0.4167	5.745	0.2936	Flii
-0.4165	4.186	0.5485	Golm2
-0.4165	3.708	0.5581	Eif1ad
-0.4164	7.814	0.24	Rasal2
-0.4162	6.305	0.5841	Crybb1
-0.4161	5.344	0.3373	Cpsf2
-0.4151	4.289	0.4877	Dpp9
-0.4148	11.15	0.04547	Cx3cr1
-0.4146	4.549	0.439	Pmpca
-0.4145	6.498	0.4229	Rpl23
-0.4135	4.321	0.5082	Tmem230
-0.4131	6.005	0.36	Mcfd2
-0.4131	3.438	0.6382	Eif2b5
-0.4128	5.74	0.3945	Ms4a6d
-0.4128	3.496	0.6798	4931422A03Rik
-0.4126	9.07	0.07793	Myh9
-0.4124	6.69	0.3423	Nucb1
-0.4124	5.786	0.3945	Cep152
-0.4123	4.564	0.3899	Bud31
-0.4122	3.833	0.5746	Cd2bp2
-0.412	6.785	0.2824	Pals2
-0.4119	6.646	0.1759	Lasp1
-0.4117	4.937	0.478	Fut10
-0.4116	5.217	0.415	Psmb8
-0.4113	6.931	0.1721	Prkar1a
-0.4109	5.433	0.3084	Txnrd1
-0.4108	3.848	0.7037	Pigb
-0.4104	5.068	0.451	Ctbp2
-0.4099	4.555	0.4643	Pfas
-0.4097	7.306	0.1755	Ifnar2
-0.4097	4.237	0.461	Wdr91
-0.4089	5.683	0.3408	Tnfsf13b
-0.4087	4.409	0.4997	Mavs
-0.4086	3.819	0.6391	Ciao1
-0.4084	7.009	0.24	Serbp1
-0.4082	6.353	0.235	Ston2
-0.4082	11.52	0.4921	Ctss
-0.408	5.156	0.4605	Nsun6
-0.4075	4.889	0.4205	Rrm2b
-0.4062	4.956	0.3781	Ranbp1
-0.4061	11.97	0.07737	Hexb
-0.4053	4.584	0.4772	Ei24
-0.4049	3.842	0.5954	Ndufa13
-0.4048	6.572	0.3077	Fau
-0.4044	8.056	0.1124	Arpc2
-0.4042	4.664	0.4336	Vamp2
-0.4036	5.142	0.3858	Mat2b
-0.4034	5.019	0.3496	Uqcrc1
-0.4028	6.383	0.3669	Nlrp3
-0.4027	4.476	0.497	AW011738
-0.4025	6.49	0.2498	Arhgdib
-0.4025	6.698	0.268	Ppp2ca
-0.4025	5.723	0.2996	Spty2d1
-0.4022	7.592	0.1776	Adgrg1
-0.402	3.832	0.628	Smyd5
-0.4013	5.272	0.3349	Slc35c2
-0.4011	7.157	0.1461	Ywhab
-0.4006	4.528	0.4708	Mpdu1
-0.4006	5.12	0.4797	Aldh3a2
-0.4005	4.427	0.4703	Ncbp2
-0.4001	3.994	0.5855	Qars
-0.3995	5.218	0.4029	Eno1
-0.3992	5.662	0.353	Lipe
-0.3992	5.207	0.4877	Ppm1g
-0.3992	3.741	0.5649	Ppp2r5d
-0.3988	5.052	0.4205	Mesd
-0.3988	4.73	0.4207	Pogk
-0.3985	6.54	0.3134	Kras
-0.3985	5.06	0.4376	Glmp
-0.3973	6.163	0.2985	Irf7
-0.3973	6.336	0.3635	Hnrnpa1
-0.3969	6.889	0.1759	Shisa5
-0.3969	5.658	0.3084	Pi4k2a
-0.3964	6.7	0.2669	Polr2a
-0.3964	5.231	0.4847	Ergic3
-0.3962	4.633	0.4312	Ankrd50
-0.3958	5.381	0.3545	Psmc2
-0.3954	5.979	0.3266	Eloa
-0.3952	4.054	0.5133	Fcf1
-0.395	6.347	0.2319	Bzw1
-0.3936	6.712	0.2577	Top2b
-0.3935	4.622	0.4745	Rnf24
-0.3932	6.151	0.3111	A930015D03Rik
-0.393	4.338	0.5112	Pdhb
-0.3917	8.148	0.137	Ifngr1
-0.3914	5.738	0.9631	Xist
-0.3912	4.307	0.5423	Slc25a51
-0.3911	6.865	0.2378	Eif3c
-0.3909	5.33	0.3297	Wbp11
-0.3905	6.874	0.2365	Sft2d2
-0.3902	4.077	0.5392	Cpox
-0.3902	3.856	0.561	Rbfa
-0.3901	6.583	0.2366	Rdx
-0.3899	4.788	0.4609	Sdhb
-0.3895	5.604	0.3015	Foxj2
-0.3895	3.955	0.5746	Slc35e3
-0.3894	4.225	0.5491	Utp18
-0.3889	6.135	0.3943	Vps37b
-0.3884	5.366	0.4363	Arid3a
-0.388	7.191	0.1912	Gvin-ps7
-0.388	4.925	0.4722	Zfp758
-0.3879	4.76	0.4886	Fem1b
-0.3878	5.2	0.4459	Cbx5
-0.3876	8.328	0.1759	Sall1
-0.3875	4.995	0.4327	Myl6
-0.3867	8.196	0.2935	Npc2
-0.3864	4.486	0.5392	Tab1
-0.3861	3.752	0.5786	Plrg1
-0.3859	6.379	0.2686	Rad21
-0.3857	5.302	0.3459	Ccpg1
-0.3856	4.85	0.4533	Lipo3
-0.3856	4.878	0.5149	Gpr108
-0.3846	5.358	0.3671	Tecr
-0.3845	4.289	0.5685	Ppp1r11
-0.3845	4.251	0.6009	Mccc2
-0.3843	5.149	0.415	Ncln
-0.3842	5.906	0.3171	Rrp1
-0.3842	4.51	0.4847	Tmem9b
-0.3831	4.969	0.4363	BC004004
-0.383	4.264	0.6224	Bccip
-0.3814	6.198	0.3077	Cndp2
-0.3814	4.62	0.6106	Nuak2
-0.3813	5.938	0.3899	Ids
-0.381	5.903	0.3459	Dnaja2
-0.3803	6.66	0.1918	Tmod3
-0.3802	4.642	0.5229	Gm46367
-0.3801	5.694	0.3492	Coro1b
-0.38	4.475	0.4708	Mak16
-0.3799	4.164	0.5581	Polr3c
-0.3795	5.31	0.4931	Ppp1r13b
-0.3794	5.894	0.27	Vps33a
-0.3789	4.596	0.4921	Bpnt2
-0.3789	3.896	0.5786	Gm45902
-0.3789	3.854	0.6566	Hars
-0.3788	9.204	0.2282	Cd81
-0.3787	6.073	0.3437	Ripk2
-0.3787	4.599	0.4405	Norad
-0.3782	4.968	0.4632	Pbx2
-0.3772	4.458	0.5149	Plekha3
-0.377	7.583	0.2935	Slfn5
-0.3768	4.427	0.6297	ENSMUSG00000121395
-0.3762	4.785	0.4703	Rbm12
-0.3762	4.163	0.5758	Slx4
-0.3757	5.908	0.2982	Anapc5
-0.3757	4.302	0.5649	Ltbr
-0.3755	7.037	0.2319	Akr1a1
-0.3754	5.723	0.408	Tmem64
-0.3753	4.978	0.5066	Gtf2ird2
-0.3753	4.114	0.6126	Ebna1bp2
-0.3749	5.225	0.415	Gm44503
-0.3748	7.018	0.2118	Tax1bp1
-0.3747	5.649	0.3899	Mapk3
-0.3746	6.607	0.3726	Sdf4
-0.3746	4.682	0.4462	Tars
-0.3745	8.649	0.1357	Actr2
-0.3745	6.008	0.3459	Setd1b
-0.3742	5.229	0.4851	Prkcsh
-0.3742	3.965	0.6019	Klhdc2
-0.374	4.767	0.439	Fkbp2
-0.3739	6.128	0.3437	Adgrl2
-0.3739	5.616	0.4336	Dyrk2
-0.3735	4.659	0.4708	Ncoa4
-0.3735	3.962	0.5352	Ccndbp1
-0.3735	4.925	0.6295	Kdm6b
-0.3726	4.27	0.5389	Srd5a3
-0.3723	11.09	0.07737	Csf1r
-0.3723	6.824	0.2669	Pmp22
-0.3723	5.698	0.3309	Rab11b
-0.3721	5.334	0.4165	Casp8ap2
-0.3721	4.843	0.4743	Siae
-0.3718	8.011	0.2457	Ifit2
-0.3713	3.854	0.6393	Cdc14b
-0.3712	4.337	0.5108	Cnot9
-0.3709	5.01	0.4638	Mboat7
-0.3707	7.676	0.1968	Atf6
-0.3704	6.958	0.22	Sowahc
-0.3704	4.879	0.4708	Syf2
-0.3698	5.227	0.3869	Map1lc3b
-0.3696	4.07	0.5746	Pin1
-0.3693	4.547	0.5453	Ftsj3
-0.3689	4.494	0.6536	Cox8a
-0.3687	3.874	0.6342	Cdk5rap3
-0.3685	5.483	0.5041	Nrbp1
-0.3684	6.868	0.3459	Ddx39b
-0.3682	4.126	0.5149	Cdipt
-0.3679	3.93	0.5746	Slc50a1
-0.3677	4.442	0.478	Vipas39
-0.3677	4.376	0.4971	Kat2a
-0.3677	3.928	0.5654	Lmnb1
-0.3671	7.089	0.2565	Nmt1
-0.3669	5.942	0.4107	Fbxw8
-0.3667	4.35	0.5733	Vash1
-0.3665	8.242	0.1631	Hnrnpu
-0.3658	5.129	0.4285	Fam20b
-0.3654	7.951	0.1404	Lgals9
-0.3651	5.924	0.382	Bag1
-0.3651	4.996	0.443	Yipf5
-0.3648	5.774	0.3726	Kat7
-0.3647	3.9	0.597	Mmgt2
-0.3646	4.133	0.55	Zfp330
-0.3645	9.643	0.1896	Itgam
-0.3644	6.34	0.3781	Bltp2
-0.3641	4.056	0.667	Btf3l4
-0.3639	5.96	0.316	Adipor2
-0.3639	5.296	0.4442	Ppil4
-0.3637	7.209	0.2161	Spred1
-0.3637	5.299	0.5914	Atp6v0e
-0.3637	3.695	0.6418	Psmb3
-0.3635	5.579	0.7986	C5ar1
-0.3634	6.476	0.3726	Tmem50a
-0.3634	4.007	0.5392	Sap30
-0.3633	4.817	0.4682	Slc35b3
-0.3633	4.964	0.5232	Mdh2
-0.3632	5.472	0.39	Nudt4
-0.3629	4.538	0.55	Dad1
-0.3627	6.671	0.2541	Atp6ap2
-0.3623	4.185	0.5946	Slc25a13
-0.3617	4.215	0.5649	Nbn
-0.3613	6.084	0.3276	Arl6ip5
-0.3612	5.973	0.3797	Tcof1
-0.3611	7.838	0.1968	Scamp2
-0.3609	7.227	0.3034	Ctnnd1
-0.3609	6.027	0.8081	Nfkbiz
-0.3605	4.922	0.4929	Cpsf1
-0.3605	4.13	0.5668	Nagk
-0.3602	6.556	0.2772	Smad7
-0.36	4.892	0.571	2810004N23Rik
-0.3596	4.443	0.5497	Drap1
-0.3595	4.117	0.6082	Larp7
-0.3594	5.763	0.3589	Usp22
-0.3594	5.222	0.4817	Itpr3
-0.3591	7.927	0.2055	Atg10
-0.3589	5.099	0.4907	Pdap1
-0.3586	4.809	0.5392	Tle5
-0.3585	4.839	0.4662	Cnih4
-0.3585	3.617	0.6376	Gyg
-0.3584	5.883	0.2983	Notch1
-0.3582	6.801	0.2319	Sf1
-0.3581	5.477	0.3831	Ogfr
-0.3579	5.401	0.4498	Kcnj2
-0.3578	3.464	0.6759	Commd6
-0.3576	4.085	0.6601	Nkain2
-0.3575	4.847	0.4562	Lrrc59
-0.3574	8.77	0.1497	Lims1
-0.3573	5.771	0.5392	Eif5a
-0.3566	5.102	0.4559	Smndc1
-0.3563	5.532	0.4996	Clcc1
-0.3554	5.515	0.4466	Zeb2os
-0.3548	5.406	0.4921	Per1
-0.3543	6.746	0.2846	Tmed5
-0.3543	4.155	0.6073	Rit1
-0.3541	5.634	0.4078	Rnf144b
-0.3534	5.463	0.4682	Rab35
-0.3534	3.995	0.6046	Phf23
-0.3532	6.34	0.3184	Smarca5
-0.3531	4.469	0.5352	Rtraf
-0.353	4.384	0.5006	1810030O07Rik
-0.353	4.434	0.5496	Ube2j2
-0.3528	3.547	0.6875	Rsl24d1
-0.3526	4.976	0.4533	Kdelr2
-0.3524	7.485	0.318	Gspt1
-0.3524	5.732	0.3587	Micos10
-0.3522	6.167	0.4253	Arel1
-0.352	4.494	0.5062	Tcf3
-0.351	6.477	0.3148	Ralb
-0.3509	7.146	0.2539	Aff4
-0.3501	6.415	0.3065	St3gal2
-0.35	5.135	0.5157	Zc3h6
-0.3496	3.747	0.6826	Tmco6
-0.3492	5.817	0.3462	Pttg1ip
-0.3489	5.476	0.3846	Rbbp7
-0.3488	3.753	0.625	Haao
-0.3487	6.914	0.3436	Arf1
-0.3487	7.486	0.6387	A830008E24Rik
-0.3486	4.833	0.5251	Tal1
-0.3485	3.917	0.6088	Tada2a
-0.3482	5.487	0.4108	Pank3
-0.3479	5.802	0.6224	Tmem176b
-0.3477	5.187	0.4371	Cmtm3
-0.3476	8.749	0.3095	Lamp1
-0.3474	8.046	0.2455	Adgre1
-0.3472	4.122	0.5932	Ticam2
-0.347	5.377	0.4682	Tlr9
-0.3469	6.268	0.415	Rgmb
-0.3469	6.075	0.4703	Nacc2
-0.3459	6.24	0.3629	Adam15
-0.3456	6.087	0.3181	Cdc27
-0.3447	4.658	0.9313	Gm26992
-0.3446	4.459	0.5224	Trim37
-0.3444	5.067	0.5133	Plau
-0.3444	4.635	0.5225	Abcf2
-0.3443	5.465	0.4161	Atxn7l3b
-0.3441	5.192	0.443	Phgdh
-0.3438	4.134	0.5979	Poldip2
-0.3432	4.011	0.6102	Pdik1l
-0.3431	8.621	0.2521	Cdh23
-0.343	4.714	0.5761	Card6
-0.3427	4.951	0.5485	Lsm12
-0.3426	5.196	0.4224	Naa60
-0.3425	3.204	0.7959	Elac2
-0.3424	4.003	0.6631	Mthfd2
-0.3422	4.179	0.6505	Slc35e1
-0.3417	5.79	0.3966	Sec61a1
-0.3414	6.547	0.3171	Clstn1
-0.3414	3.939	0.632	Dok1
-0.3413	5.89	0.4329	Uhmk1
-0.3412	5.113	0.4817	Ostm1
-0.3411	5.988	0.4176	Golim4
-0.3409	5.7	0.3726	Psme2
-0.3407	5.133	0.5228	Hnrnpa0
-0.3406	4.985	0.5118	Coa5
-0.3406	4.853	0.5666	Pigt
-0.3405	9.497	0.3031	Plek
-0.3405	6.727	0.3781	Arhgef40
-0.3405	4.806	0.5073	Dcaf11
-0.3404	6.678	0.2725	Arhgap4
-0.34	9.681	0.2268	Selplg
-0.3399	5.612	0.3726	Iws1
-0.3394	5.906	0.4937	Glb1
-0.3392	5.595	0.4322	Zdhhc5
-0.3391	4.178	0.6208	Sfxn1
-0.3389	4.668	0.5758	2510039O18Rik
-0.3384	4.713	0.5804	Rab1b
-0.3383	7.219	0.2449	Hnrnpc
-0.3383	3.746	0.7094	Zfp141
-0.3379	5.616	0.3763	Aars
-0.3371	4.729	0.5062	Rad17
-0.3366	5.368	0.6816	I830077J02Rik
-0.3363	4.04	0.6459	Isg20l2
-0.3362	6.574	0.3587	Dnajc3
-0.336	8.837	0.1367	Cttnbp2nl
-0.336	6.671	0.3111	Eif5
-0.336	6.073	0.3281	Ctsf
-0.336	4.7	0.554	Hmg20b
-0.3357	7.682	0.2366	Rac1
-0.3357	6.502	0.3334	Hcfc1
-0.3357	4.927	0.585	Ifrd1
-0.3356	5.605	0.3859	Ilf3
-0.3356	6.863	0.6893	Cd63
-0.335	7.607	0.2996	Ucp2
-0.3349	3.791	0.692	Rrm1
-0.3346	6.779	0.2686	Spen
-0.3346	4.87	0.7124	Gm27008
-0.3343	7.488	0.313	Ppt1
-0.3342	5.789	0.4466	Wbp2
-0.3338	3.849	0.7129	Med28
-0.3337	5.306	0.4392	Lima1
-0.3336	6.691	0.4941	Flnb
-0.3336	4.225	0.688	Cdk4
-0.3336	3.863	0.7214	Gch1
-0.3332	6.989	0.3077	Pon3
-0.3332	4.272	0.5954	Srl
-0.3332	3.394	0.7581	Ttc12
-0.333	8.903	0.1541	Cltc
-0.3328	5.176	0.4452	Syap1
-0.3327	3.909	0.6961	Ints7
-0.3326	4.837	0.5885	Gbp3
-0.3326	6.029	0.7329	Rbpms
-0.3326	3.588	0.7833	Cad
-0.3323	3.583	0.6777	Med19
-0.3321	5.69	0.3671	Rps2
-0.3317	4.788	0.5103	Puf60
-0.3317	4.548	0.5402	Ccdc174
-0.3315	5.939	0.5057	Asah2
-0.3313	6.054	0.3462	Atl3
-0.3312	6.216	0.4851	Tubb5
-0.331	4.313	0.543	Adpgk
-0.3308	6.322	0.4263	Ksr1
-0.3305	4.813	0.5224	Atraid
-0.3297	6.559	0.451	Rab27a
-0.3293	6.621	0.3721	Erap1
-0.3289	6.452	0.302	Ctnna1
-0.3285	5.297	0.5118	Nap1l1
-0.3285	3.925	0.6267	Fem1a
-0.3284	5.193	0.4729	Fem1c
-0.3281	7.714	0.2301	Itgb1
-0.3281	6.402	0.3763	Vps4b
-0.328	5.45	0.523	Naga
-0.3278	4.232	0.6297	Zfp146
-0.3276	7.3	0.4133	Cd68
-0.3274	4.848	0.5572	Med22
-0.3274	4.119	0.5954	Cd151
-0.3274	3.995	0.7937	Csrnp1
-0.3273	4.154	0.6896	Gm17435
-0.3272	5.246	0.5153	Mknk2
-0.3266	4.309	0.5946	Creld2
-0.3262	7.308	0.2416	Tapbp
-0.3257	8.055	0.2557	Ubl3
-0.3255	6.829	0.3134	Hnrnpl
-0.325	4.163	0.5924	Umps
-0.3246	4.223	0.6133	Gsr
-0.3242	8.099	0.2055	Snx13
-0.3237	3.807	0.7055	Emd
-0.3235	4.94	0.692	Bcl6
-0.3233	4.883	0.4988	Hsf1
-0.3231	5.147	0.5491	Ube2l6
-0.323	5.439	0.4722	Srsf9
-0.3229	6.937	0.313	Hspa4
-0.3224	6.906	0.2586	Csnk1e
-0.3222	3.986	0.6317	Mmut
-0.3217	6.09	0.4377	Ipo9
-0.3216	4.088	0.6849	Cxxc1
-0.3213	6.028	0.4406	Gmeb1
-0.321	6.381	0.4478	Phf11b
-0.3208	7.458	0.2925	Eif4g1
-0.3207	7.846	0.2115	Hk2
-0.3203	4.874	0.5255	Ppfibp1
-0.3203	3.991	0.655	Klhl11
-0.3199	6.265	0.3721	Hnrnpf
-0.3196	3.904	0.6225	Sf3a2
-0.3195	6.571	0.3563	Ago1
-0.3195	4.649	0.6849	Gde1
-0.3192	5.286	0.4917	Bmi1
-0.319	5.794	0.415	Snx3
-0.319	4.411	0.5746	Zbtb43
-0.3188	5.435	0.7166	Rbfox2
-0.3188	4.116	0.7408	AI506816
-0.3187	5.874	0.3869	Pycard
-0.3182	10.3	0.3563	Itm2b
-0.3179	6.969	0.3459	Nars
-0.3178	6.093	0.8353	H2-Q4
-0.3177	10.05	0.1679	Serinc3
-0.3176	3.74	0.733	Usp1
-0.3175	4.697	0.6976	Tor1b
-0.3174	3.938	0.6543	Thap12
-0.3171	6.663	0.3546	Tram1
-0.3168	4.708	0.815	Vcam1
-0.3167	3.861	0.6822	Myc
-0.316	8.285	0.1934	Lnpep
-0.316	4.236	0.6258	Mpv17l
-0.3159	6.323	0.39	Rab5c
-0.3156	4.63	0.6035	Copz1
-0.3155	4.569	0.5746	Atf4
-0.3151	5.691	0.415	Ugp2
-0.3148	4.738	0.5786	Mcrip1
-0.3148	4.565	0.5946	Traf7
-0.3147	5.636	0.4729	Calcrl
-0.3145	4.018	0.6349	Nrde2
-0.3142	5.337	0.5392	Iqsec1
-0.3139	6.142	0.5746	Klf6
-0.3137	4.533	0.5747	Clk3
-0.3122	4.727	0.5954	Rnasel
-0.3119	5.893	0.4802	Nfatc3
-0.3118	4.945	0.5352	Vhl
-0.3118	4.586	0.585	Znhit6
-0.3117	4.275	0.6526	Sphk2
-0.3114	7.771	0.2262	Rnf130
-0.3111	4.909	0.5713	Slc39a1
-0.311	5.45	0.4474	Dusp3
-0.3107	6.454	0.3429	Ssb
-0.3106	4.773	0.5963	Hmgcl
-0.3102	5.194	0.5694	Dnmt1
-0.31	5.397	0.4662	Gm44250
-0.31	5.536	0.5302	Irf1
-0.3098	10.85	0.7592	Ctsb
-0.309	6.852	0.4031	Sun2
-0.3086	6.275	0.3936	Nt5dc1
-0.3083	4.461	0.6513	Tesk1
-0.308	5.972	0.4377	Atg3
-0.308	4.349	0.6039	Bap1
-0.3079	5.755	0.5314	Rcc2
-0.3078	7.814	0.2837	Edem1
-0.3074	5.975	0.443	Cysltr1
-0.3073	3.924	0.6759	Slc35a1
-0.307	6.894	0.4142	Hnrnpa3
-0.307	4.379	0.6267	Ccdc59
-0.3066	7.543	0.3439	H2-T24
-0.3064	5.4	0.4562	Sec11c
-0.3063	5.568	0.5229	Scd2
-0.3063	4.258	0.7339	Prdx5
-0.305	4.07	0.6692	Mms22l
-0.3049	4.7	0.6133	Snrpb
-0.3044	6.786	0.3054	Bhlhe41
-0.3042	4.901	0.575	Nup155
-0.3041	6.422	0.4237	Tmf1
-0.3041	4.1	0.7468	PTPRG
-0.304	5.259	0.5138	Zfp518a
-0.3038	4.282	0.6602	A730081D07Rik
-0.3038	3.822	0.6697	Csnk2b
-0.3037	5.205	0.5121	Bag6
-0.303	6.568	0.4496	Atp6v1a
-0.3028	11.08	0.7431	Ctsd
-0.3025	5.321	0.5419	Ppp2r1a
-0.3023	6.119	0.4605	Afap1l1
-0.3019	4.799	0.568	Actl6a
-0.3018	5.381	0.5224	Zfp24
-0.3016	6.223	0.3707	Mfap3
-0.3014	3.932	0.7052	Tmem242
-0.301	5.399	0.543	Cmpk1
-0.3008	7.614	0.3734	Slc23a2
-0.3007	4.639	0.595	Vps36
-0.3006	4.297	0.6708	Gpsm3
-0.3005	5.775	0.4675	Pip4k2b
-0.3003	5.732	0.4718	Bnip3l
-0.3003	5.355	0.4853	Cat
-0.3002	4.285	0.6339	Aldh16a1
-0.3001	7.511	0.2801	Pla2g15
-0.3001	7.203	0.3239	Npc1
-0.3001	6.811	0.3571	Hmox2
-0.2999	4.159	0.6612	Isca1
-0.2996	8.203	0.249	Dync1h1
-0.2995	5.905	0.4462	Bcap31
-0.2993	5.589	0.5334	Cct4
-0.2986	5.873	0.4452	Ubtf
-0.2986	3.811	0.7069	Tmem156
-0.2984	4.036	0.6816	Taf6
-0.2983	6.008	0.4275	Edem2
-0.2979	4.171	0.626	4833411C07Rik
-0.2979	3.965	0.7431	Gatad1
-0.2977	4.753	0.8105	Mb21d2
-0.2974	4.909	0.5402	Spats2
-0.297	6.65	0.4363	Kcnk6
-0.2966	5.535	0.5535	Rbl1
-0.2965	6.223	0.4392	Ppp1r18
-0.2965	4.259	0.6327	Fam98a
-0.2962	4.611	0.6413	Iscu
-0.296	4.116	0.6486	Fam220a - ENSMUSG00000083012
-0.2956	8.527	0.2364	Mtus1
-0.2955	3.641	0.7341	Ndc1
-0.2952	4.019	0.6692	Zfp597
-0.2951	6.2	0.4152	Snx1
-0.295	4.4	0.6154	Hspa13
-0.2947	5.863	0.4377	Brip1os
-0.2947	5.578	0.4523	Clcn4
-0.2947	4.303	0.6883	Tbp
-0.2945	5.622	0.4951	Ctdspl2
-0.2939	4.69	0.6178	Zfp410
-0.2936	6.109	0.4794	Usp2
-0.2936	5.39	0.5786	Atp6v1d
-0.2934	5.554	0.4984	Api5
-0.2934	4.603	0.6532	Maz
-0.2934	4.309	0.8218	Nfkbid
-0.2933	4.128	0.6865	Ints12
-0.2932	9.438	0.7322	C1qc
-0.293	3.847	0.7149	Lrp4
-0.2928	8.039	0.3943	Slc15a3
-0.2927	5.744	0.5163	Napa
-0.2926	6.633	0.3877	Sf3b2
-0.2926	8.025	0.451	Ctsa
-0.2926	5.378	0.5055	Trappc14
-0.2925	6.938	0.3629	Matr3
-0.2923	6.268	0.5069	Magi3
-0.2921	4.193	0.6486	Pnpla2
-0.292	4.4	0.6267	Tmem43
-0.2919	4.8	0.5808	Bcl10
-0.2918	8.245	0.2457	Hck
-0.2918	7.538	0.2562	Caprin1
-0.2915	5.768	0.4988	Atad1
-0.2915	4.194	0.6601	Farsa
-0.2913	4.462	0.6361	Tlr12
-0.2912	7.582	0.5122	Fcer1g
-0.291	4.61	0.6071	Cep57
-0.291	4.242	0.6659	Atpif1
-0.2909	6.293	0.4263	Ncstn
-0.2909	6.253	0.4363	Etf1
-0.2908	5.293	0.5746	Pafah1b2
-0.2908	4.806	0.6098	Homer1
-0.2906	4.825	0.5866	Glcci1
-0.2905	5.327	0.5599	Cggbp1
-0.2905	4.288	0.6644	Timmdc1
-0.2902	4.784	0.6357	Ncaph2
-0.2902	4.207	0.6601	Qdpr
-0.29	4.21	0.713	Med7
-0.2899	9.384	0.2279	4933406I18Rik
-0.2899	3.757	0.7946	Gsdme
-0.2897	5.462	0.461	Fundc1
-0.2897	4.989	0.5459	Mtmr4
-0.2897	3.861	0.7204	Aldh9a1
-0.2894	6.913	0.3622	G3bp2
-0.2892	5.917	0.4931	Srsf2
-0.2891	4.152	0.663	Pdcl
-0.2889	4.931	0.5922	Plagl2
-0.2887	5.175	0.5651	Cldnd1
-0.2882	5.379	0.6566	Igbp1
-0.2882	4.675	0.6725	Plk3
-0.2882	3.915	0.7457	Coq9
-0.288	9.377	0.2471	Gns
-0.2871	5.106	0.5746	Yars
-0.287	3.936	0.7239	Plpbp
-0.2868	5.353	0.5216	Eif3b
-0.2868	4.179	0.6896	Vps52
-0.2866	4.214	0.642	Fbl
-0.2864	6.183	0.543	Prmt3
-0.2864	4.625	0.6662	Gipc1
-0.2863	8.298	0.2293	Ptbp3
-0.2861	9.953	0.6744	C1qb
-0.2858	4.489	0.6265	Mydgf
-0.2856	10.2	0.1761	Laptm5
-0.2853	7.525	0.5746	Ywhah
-0.2853	4.676	0.5876	Ncbp1
-0.2852	5.621	0.5265	Zhx3
-0.2852	4.155	0.6787	2410006H16Rik
-0.2847	3.848	0.7016	Trpm3
-0.2847	4.214	0.7213	Zfp622
-0.2844	6.836	0.3812	Ppp6r1
-0.2843	4.396	0.6148	Edc4
-0.2843	6.535	0.7305	Gmds
-0.2839	6.22	0.478	Gltp
-0.2839	6.112	0.5151	Smc1a
-0.2838	4.337	0.6822	Zfp276
-0.2837	6.571	0.4804	Clcn5
-0.2835	9.121	0.2084	Unc93b1
-0.2832	5.969	0.4237	Necap2
-0.2832	6.406	0.4735	Klhl6
-0.2832	3.878	0.7032	Tpm1
-0.2828	8.032	0.2364	Znfx1
-0.2826	3.986	0.6849	Ngdn
-0.2822	12.06	0.4532	mt-Rnr2
-0.282	10.35	0.3366	Inpp4b
-0.2819	5.531	0.5129	Plaa
-0.2817	4.733	0.6339	Casp3
-0.2816	5.037	0.6356	Gid8
-0.2814	6.305	0.415	Hnrnpul2
-0.2813	4.986	0.5876	Stk11
-0.2812	4.272	0.8436	Gm37168
-0.281	7.692	0.281	Dtx4
-0.2809	5.834	0.5312	Capns1
-0.2805	4.697	0.6447	Sp2
-0.2801	5.697	0.461	Erlin2
-0.2801	5.242	0.5431	Leprotl1
-0.28	3.666	0.7398	Btbd2
-0.2798	6.672	0.4107	Uggt1
-0.2798	6.289	0.4592	Sec16a
-0.2798	5.675	0.4834	Gclc
-0.2796	5.476	0.5808	Rab6a
-0.2795	5.114	0.561	Tpi1
-0.2793	6.223	0.415	Mat2a
-0.2793	5.166	0.5691	Tiprl
-0.2793	3.499	0.8509	ENSMUSG00000120024
-0.2787	4.453	0.628	Arhgap1
-0.2783	5.963	0.4392	Ext2
-0.2781	6.291	0.4708	Srsf3
-0.278	5.972	0.4562	Nfe2l1
-0.2779	6.215	0.4433	Sil1
-0.2779	3.899	0.6976	Ift46
-0.2771	4.088	0.7144	Polr1d
-0.2768	4.695	0.6952	Slu7
-0.2763	4.212	0.6873	Usp11
-0.276	6.167	0.4363	Tnfrsf1a
-0.2756	6.987	0.5188	Tcn2
-0.2756	4.318	0.6873	Pwp1
-0.2751	4.903	0.6104	Vdac1
-0.2746	7.655	0.3781	Ptpro
-0.2746	3.963	0.7016	Galnt4
-0.2744	5.296	0.5746	Primpol
-0.2741	8.252	0.2498	Rap1b
-0.274	6.186	0.4363	Hdac4
-0.2739	5.84	0.5565	Tdrd3
-0.2737	6.168	0.6148	Rap1gap2
-0.2737	5.205	0.6697	Ctbp1
-0.2736	4.99	0.6108	Slc35b4
-0.2735	5.02	0.5929	Zdhhc6
-0.2734	6.049	0.5314	Atp5c1
-0.2734	4.122	0.6798	AI987944
-0.2729	8.493	0.3134	Adam10
-0.2728	5.073	0.6009	Ptgr2
-0.2727	6.745	0.4023	Vps35
-0.2723	4.811	0.6901	Ikbkg
-0.272	8.004	0.3746	Tjp1
-0.2717	6.003	0.5569	Sptan1
-0.2717	4.539	0.7265	Gm37233
-0.2712	5.065	0.6481	Rbm22
-0.2707	4.904	0.6009	Cox7a2l
-0.2707	4.412	0.667	Dnajc21
-0.2707	3.458	0.8056	Ampd2
-0.2705	8.349	0.2817	Slc29a3
-0.2703	8.583	0.2705	Fam102b
-0.27	5.801	0.4695	Irf9
-0.2698	10.29	0.5866	Mpeg1
-0.2697	5.399	0.6104	Cops2
-0.2695	5.206	0.5593	Vamp1
-0.2695	3.377	0.7964	AI504432
-0.2695	3.764	0.8005	Zfp12
-0.2694	4.657	0.617	Oxa1l
-0.2694	4.659	0.6602	Pck2
-0.2693	6.63	0.4359	Ehbp1
-0.2691	3.842	0.7661	Pex19
-0.2689	8.062	0.2848	Cbl
-0.2689	6.105	0.4971	Rcan1
-0.2688	4.124	0.714	Gm15850
-0.2686	4.422	0.688	Zfp729b
-0.2685	5.626	0.543	Focad
-0.2685	5.167	0.6317	Gnl3
-0.2683	8.022	0.6893	Sdc3
-0.2681	4.895	0.6286	N4bp2
-0.268	6.532	0.5056	Il17ra
-0.2679	4.304	0.707	Trim47
-0.2679	4.092	0.7655	Slc35a4
-0.2678	6.973	0.4562	Ust
-0.2678	4.611	0.6749	Actr1b
-0.2677	4.339	0.6704	Maf1
-0.2675	6.727	0.4605	Anp32a
-0.2675	5.883	0.5136	Ap1s2
-0.2675	5.683	0.6272	Grina
-0.2675	5.045	0.6602	Golga2
-0.2675	3.938	0.7094	Rad51d
-0.2668	5.324	0.5366	Rela
-0.2667	4.762	0.6464	Gsk3a
-0.2666	4.279	0.6893	Grpel2
-0.2666	4.085	0.6981	Prelid3b
-0.2663	4.973	0.6225	Ccdc97
-0.2661	4.976	0.6089	Dnaja3
-0.2659	6.468	0.6558	Ube2e2
-0.2657	5.752	0.4889	Thoc2l
-0.2657	5.418	0.5808	Morrbid
-0.2657	4.757	0.6664	Mthfd1
-0.2656	4.581	0.7094	Lysmd3
-0.2653	6.012	0.5846	Lap3
-0.2649	4.44	0.6601	Rusf1
-0.2645	6.345	0.4817	Map7d1
-0.2644	6.127	0.5357	Parp1
-0.2644	3.697	0.768	Cc2d1a
-0.2642	6.255	0.5122	Nipa2
-0.2642	4.348	0.666	Rbm10
-0.2641	6.821	0.3986	Glud1
-0.2638	3.838	0.7417	Fh1
-0.2637	6.173	0.5322	Nup153
-0.2637	3.846	0.7612	Nabp1
-0.2637	3.999	0.7808	Plcb4
-0.2636	4.067	0.7382	Tapbpl
-0.2634	3.926	0.7453	Bscl2
-0.2633	5.584	0.5343	Akirin1
-0.2631	6.197	0.4336	Akt1
-0.263	6.597	0.422	Stat6
-0.2629	7.573	0.3102	Prrc2a
-0.2628	4.203	0.6711	Pirb
-0.2626	9.584	0.2752	Vsir
-0.2626	4.554	0.657	Ampd3
-0.2625	8.242	0.2619	Tpm3
-0.2623	4.816	0.6412	Sem1
-0.2622	6.519	0.55	ENSMUSG00000121501
-0.2621	6.557	0.5117	Slc44a2
-0.2618	4.226	0.7395	Cdkn2aipnl
-0.2615	5.977	0.5651	Srpr
-0.2614	6.269	0.4503	Nono
-0.2608	4.177	0.6982	Ciao2a
-0.2606	6.672	0.4456	Gtf2a1
-0.2605	5.065	0.6659	Atmin
-0.2602	4.464	0.6631	Rbm15
-0.2599	4.599	0.6824	Cops7a
-0.2596	5.306	0.5746	Gm7072
-0.2586	6.006	0.5876	Tmpo
-0.2586	5.182	0.6249	Minpp1
-0.2584	5.596	0.6451	Rsl1d1
-0.2583	3.716	0.7655	Pvr
-0.2581	3.871	0.7417	Tfam
-0.2578	4.541	0.6304	Traf6
-0.2578	3.969	0.7468	Ddx19a
-0.2577	6.421	0.5541	Uba7
-0.2574	4.158	0.7138	Tesk2
-0.2572	9.099	0.2541	Capza2
-0.2572	6.424	0.5138	ENSMUSG00000120992
-0.2567	4.667	0.7157	Inpp5f
-0.2565	5.424	0.5392	Glod4
-0.256	8.223	0.4484	Hexa
-0.2559	8.385	0.2996	Sppl2a
-0.2559	4.268	0.666	Atp5j2
-0.2558	6.649	0.5228	Senp7
-0.2554	7.136	0.4275	Hmgb1
-0.2554	4.277	0.6882	Rrp7a
-0.2553	6.306	0.4971	Sec62
-0.2552	6.419	0.5006	Lysmd4
-0.2549	5.282	0.7237	Eef1g
-0.2547	5.981	0.5132	Immt
-0.2546	3.825	0.7371	Hsdl1
-0.2545	6.025	0.5541	Slc11a1
-0.2545	8.553	0.7166	Ctsz
-0.2545	3.948	0.7431	Prmt2
-0.2544	5.91	0.6009	Arfip1
-0.2543	6.336	0.478	Lrp12
-0.2541	7.244	0.4263	Eif3a
-0.2539	5.887	0.585	Ube2i
-0.2537	3.7	0.8171	Adal
-0.2533	3.72	0.7274	Zfp799
-0.2531	6.781	0.5229	Commd10
-0.2529	6.846	0.4237	Vapa
-0.2529	6.389	0.4336	Rtp4
-0.2528	7.188	0.4945	Tln2
-0.2525	5.518	0.7481	Tnfaip3
-0.2524	4.841	0.6416	Gm10134
-0.2524	4.231	0.7157	Stub1
-0.2524	4.601	0.7497	Paqr7
-0.2523	5.168	0.5914	Ppp4c
-0.252	6.999	0.4152	4732471J01Rik
-0.252	6.316	0.5733	Vmp1
-0.2519	6.958	0.5881	Gusb
-0.2518	5.552	0.5761	Ppp1r2
-0.2512	5.312	0.5969	Rufy1
-0.2509	6.332	0.4562	Vdac2
-0.2509	5.991	0.578	Metap2
-0.2509	4.365	0.6991	Pus7
-0.2506	5.499	0.5823	Mospd2
-0.2505	6.158	0.6777	Bcl2a1b
-0.2504	4.877	0.6153	Kdelr1
-0.2504	4.851	0.6729	Utp11
-0.2502	4.889	0.6148	Kpna6
-0.2499	5.58	0.6086	Lpar6
-0.2498	4.151	0.7592	Gm39469
-0.2497	9.827	0.3726	Cacnb2
-0.2494	4.939	0.7119	Gpc5
-0.2489	5.882	0.5211	Naa50
-0.2485	5.026	0.5997	Wbp4
-0.2482	6.512	0.5216	Srsf6
-0.2482	5.218	0.6628	Nol10
-0.2482	3.952	0.7835	Mios
-0.2478	8.321	0.3148	Fus
-0.2478	6.157	0.5875	Strn
-0.2475	8.994	0.2794	Msn
-0.2474	5.223	0.6082	Plbd2
-0.2469	5.792	0.5352	Eif2ak1
-0.2469	4.817	0.6299	Chmp2b
-0.2469	4.848	0.666	Lsm6
-0.2468	5.109	0.5954	Sar1a
-0.2467	4.692	0.714	Usp46
-0.2464	4.728	0.6896	Phf11a
-0.2462	5.91	0.6248	Pfkfb4
-0.2459	4.192	0.6882	Las1l
-0.2458	5.686	0.7138	B4galt4
-0.2456	6.227	0.55	Ptpa
-0.2456	5.696	0.5577	Ptges3
-0.245	3.946	0.7735	Chpf2
-0.2449	7.807	0.3781	Nlrp1b
-0.2447	5.974	0.603	Khdrbs3
-0.2447	3.643	0.7864	Yif1b
-0.2444	6.1	0.5128	Dbnl
-0.2438	10.24	0.3051	Ptprj
-0.2437	5.106	0.6148	Anxa7
-0.2436	6.015	0.6357	mt-Nd1
-0.2435	4.812	0.6497	Prxl2c
-0.2434	4.613	0.6865	Nolc1
-0.2433	5.547	0.6501	Adam9
-0.2431	9.12	0.3563	Kctd12
-0.243	6.605	0.4851	Arpc5
-0.2429	4.244	0.7135	Ndufa6
-0.2429	3.299	0.8307	Casp2
-0.2427	4.571	0.7138	Gart
-0.2424	4.901	0.6704	Clcn6
-0.2424	4.525	0.7169	Mecr
-0.2421	6.638	0.4695	Camkk2
-0.242	5.86	0.6009	Trit1
-0.242	4.526	0.6896	Trnt1
-0.242	5.016	0.7084	Ganc
-0.2413	7.114	0.4794	Raly
-0.2413	4.813	0.6976	Ap3m2
-0.2411	5.593	0.6297	Copg1
-0.2408	7.145	0.5065	Ptpn6
-0.2407	3.846	0.7964	Bpnt1
-0.2405	4.633	0.6884	Nmd3
-0.2404	5.284	0.6342	Pomp
-0.2404	4.893	0.6826	Arid5a
-0.2402	3.958	0.7366	Cnr2
-0.2401	5.001	0.655	Zfp110
-0.2399	5.603	0.6673	Pgd
-0.2397	5.244	0.6528	Itpripl2
-0.2396	3.884	0.74	Ndufa7
-0.2395	4.567	0.6735	Mcts1
-0.2394	4.91	0.7155	Plp1
-0.2393	3.857	0.767	Smn1
-0.2391	4.131	0.7166	Or2v1
-0.2391	4.608	0.7312	Rpe
-0.2388	5.491	0.5946	Eif3j1
-0.2384	7.427	0.4573	Stat3
-0.2384	4.643	0.6602	Psma6
-0.2383	8.778	0.4334	Nr3c1
-0.2382	4.092	0.7415	Rassf1
-0.2378	7.401	0.4423	Arrb2
-0.2378	4.796	0.6631	Uba3
-0.2378	3.849	0.7251	Thap4
-0.2378	3.772	0.8011	Adam3
-0.2372	3.685	0.7773	Fhip2b
-0.237	3.913	0.7968	Hikeshi
-0.2366	6.33	0.52	Uhrf1bp1
-0.2366	5.019	0.6624	Cluh
-0.2366	3.8	0.7382	B4galt3
-0.2364	5.507	0.6224	Dnajc2
-0.2363	6.689	0.5062	Kat6b
-0.2363	5.198	0.6121	Arfgap1
-0.236	3.828	0.7773	Kyat3
-0.2359	4.521	0.7122	Eif3l
-0.2357	4.201	0.7283	Otud6b
-0.2357	4.067	0.7658	Poglut1
-0.2356	4.188	0.7155	Neo1
-0.2356	3.735	0.7837	Dtwd2
-0.2354	7.931	0.4834	Tnfrsf11a
-0.2346	4.176	0.811	Tmed3
-0.2343	8.292	0.351	Slc1a3
-0.2339	7.891	0.4177	Tm9sf3
-0.2339	4.934	0.6704	Carm1
-0.2337	6.945	0.5491	Gm35154
-0.2336	6.276	0.5284	Tgfbrap1
-0.2335	8.63	0.6694	Pabpc1
-0.2335	3.548	0.8056	Lypla2
-0.2334	4.177	0.7392	Atp5h
-0.2333	6.935	0.5224	Hipk1
-0.2331	6.086	0.6009	Smim14
-0.2329	4.152	0.7206	Hars2
-0.2329	3.853	0.7918	Fbxl14
-0.2327	4.933	0.6865	Slc7a1
-0.2326	6.087	0.52	Ttll3
-0.2325	7.348	0.4792	Chd4
-0.2319	4.25	0.7066	Rfc2
-0.2319	6.279	0.7834	Prune2
-0.2319	3.556	0.81	Uqcrb
-0.2318	5.006	0.663	Anxa6
-0.2317	4.759	0.6873	Cybc1
-0.2317	4.183	0.7386	Fam104a
-0.2314	4.621	0.7094	Cops5
-0.2314	5.14	0.7322	Exosc10
-0.2306	4.61	0.7187	Map7
-0.2305	7.704	0.4322	Pafah1b1
-0.2305	5.568	0.5954	Mkrn1
-0.2302	5.562	0.5954	Rac2
-0.2301	4.12	0.7236	Gnptg
-0.2299	3.781	0.7748	Isoc2a
-0.2299	4.358	0.8214	Cbll1
-0.2298	4.382	0.6923	Ecd
-0.2298	4.454	0.6976	Pak4
-0.2296	5.869	0.5952	Dnaja1
-0.2295	4.838	0.6826	Prkx
-0.2294	5.996	0.5401	Mapk9
-0.2293	6.133	0.5746	Ganab
-0.2291	8.93	0.3653	Rgs10
-0.2291	5.352	0.6602	Socs4
-0.2288	5.974	0.5876	Ppp1r12c
-0.2288	4.533	0.7237	Ak3
-0.2286	9.828	0.5295	Siglech
-0.2285	5.29	0.6704	Gnl2
-0.2285	5.254	0.6863	Tppp
-0.2285	3.715	0.7612	St6galnac6
-0.2284	6.374	0.5251	Rbbp4
-0.2282	4.095	0.7918	Ezh2
-0.2281	6.167	0.5395	Rhog
-0.2281	6.044	0.5694	Hipk3
-0.2279	4.106	0.7735	Pbdc1
-0.2277	6.22	0.5941	Derl1
-0.2275	4.173	0.7702	ENSMUSG00000120204
-0.2273	4.38	0.7265	Htra2
-0.2272	5.279	0.6452	Nagpa
-0.2263	3.676	0.7909	2810025M15Rik
-0.2262	6.963	0.6082	Mapkapk2
-0.2262	4.999	0.658	Tollip
-0.2261	4.236	0.7386	Krr1
-0.226	8.632	0.3811	Maf
-0.226	4.374	0.7315	4930444A19Rik
-0.2258	5.122	0.6625	Smarcb1
-0.2252	4.562	0.7671	Yipf6
-0.2251	3.949	0.8218	Bet1
-0.225	6.326	0.5808	Dpy19l1
-0.225	5.253	0.6413	Irak4
-0.2249	4.494	0.7069	Cstf2t
-0.2248	8.206	0.3945	Pacsin2
-0.2248	4.873	0.6863	Septin8
-0.2247	5.462	0.6701	Rab8a
-0.2247	4.434	0.7343	Gtf2f1
-0.2246	4.009	0.7394	Mettl14
-0.224	6.38	0.5402	Klhl5
-0.224	4.015	0.7833	Dtnb
-0.2239	5.481	0.6884	Pdcd10
-0.2239	4.146	0.7393	Vps72
-0.2236	4.826	0.663	Mta1
-0.2236	4.622	0.7468	Gm55122
-0.2236	3.858	0.7573	Lamtor5
-0.2233	3.611	0.8101	Psmd5
-0.2231	4.407	0.7206	Rnf7
-0.223	6.664	0.5391	Mia3
-0.2229	7.99	0.4474	Numa1
[truncated: 55,011 more rows]

## Sheet: DE-Unknow
logFC	AveExpr	p_val_adj	gene_names
-5.111	4.065	0.06979	Gm47283
-4.822	2.386	0.001523	Cd36
-3.981	4.882	0.0006475	Cd300lf
-3.738	2.338	0.0008923	4930519F16Rik
-3.481	2.481	0.007597	Rab37
-2.807	2.246	0.1726	Pianp
-2.63	2.792	0.2734	Gm49692
-2.576	5.414	0.244	Colec12
-2.524	6.21	3.459e-06	Nme7
-2.447	2.943	0.3378	Adamts1
-2.441	9.817	2.095e-09	Arsb
-2.235	3.764	0.05449	Angptl7
-2.176	4.246	0.4153	Gnb4
-2.14	2.69	0.09017	9330185C12Rik
-2.123	3.06	0.1172	Smad6
-1.927	3.586	0.07439	Ptger3
-1.804	2.811	0.0704	Tnr
-1.775	5.566	0.01261	Alox5
-1.767	2.882	0.1479	Gm33370
-1.755	2.919	0.159	Dnajc27
-1.754	4.289	0.009607	Rasgrp4
-1.709	3.801	0.3297	Klf2
-1.696	3.671	0.1067	Tex14
-1.681	3.016	0.659	Kif5a
-1.67	5.164	0.05694	Qsox1
-1.641	4.299	0.01993	Arhgap27os3
-1.64	3.904	0.2225	Cd244a
-1.637	7.544	0.4722	Cacna1a
-1.63	5.213	0.0019	Sfmbt2
-1.622	6.903	0.3183	Nhs
-1.62	2.972	0.1211	Ccl12
-1.616	3.153	0.53	Gpr165
-1.564	3.293	0.7628	Eif2s3y
-1.532	4.52	0.4608	Fosb
-1.526	4.678	0.04158	Gm10138
-1.489	6.514	0.1811	Jun
-1.487	3.167	0.09444	Rccd1
-1.411	4.567	0.3291	Fos
-1.41	4.359	0.02647	Tagln2
-1.407	3.628	0.09936	Socs3
-1.404	4.378	0.03858	Hmga2-ps1
-1.401	5.614	0.0004868	Ubc
-1.386	3.749	0.2402	Egr1
-1.38	3.21	0.1323	Eif3i
-1.379	5.228	0.02044	Zfp729a
-1.376	3.503	0.1479	Trib1
-1.345	3.977	0.08019	Tmsb10
-1.337	3.848	0.1608	Ssr2
-1.331	3	0.1845	Stoml2
-1.323	4.449	0.6456	Slc15a2
-1.321	4.469	0.05686	Epha2
-1.306	6.964	0.1679	Il1a
-1.297	3.575	0.05934	Glrx
-1.291	3.753	0.1101	Eif1b
-1.273	3.918	0.241	Gimap6
-1.269	2.914	0.4664	Gm54867
-1.267	5.398	0.05913	Cmtm8
-1.26	3.539	0.673	Syn2
-1.255	4.047	0.241	Ccl3
-1.228	4.73	0.1596	Cd52
-1.228	3.594	0.3076	Gem
-1.227	5.793	0.001293	Gm49342
-1.224	3.618	0.1988	Hexim1
-1.215	3.51	0.2862	D630045J12Rik
-1.212	3.217	0.6562	Zfp268
-1.206	3.355	0.1172	2210016F16Rik
-1.204	4.146	0.08755	Nectin2
-1.203	7.939	0.0004868	Xpr1
-1.178	3.726	0.1165	Saysd1
-1.173	4.116	0.08459	Ninj1
-1.157	3.125	0.2371	Alyref
-1.156	3.002	0.2947	Gm28981
-1.148	5.099	0.06459	Junb
-1.141	5.798	0.1238	Zfp36
-1.139	5.763	0.4658	Atf3
-1.136	3.797	0.1755	Slamf8
-1.135	3.73	0.2221	H1f2
-1.13	3.886	0.2728	Ccrl2
-1.129	3.44	0.3495	2010013B24Rik
-1.126	7.088	0.6079	Gatm
-1.124	6.615	0.1727	Dusp6
-1.121	3.193	0.2169	Ccdc71
-1.117	5.319	0.009467	Gpx1
-1.115	7.021	0.04073	Gpr183
-1.113	4.232	0.8341	Gm26992
-1.11	4.496	0.3363	Ppp1r15a
-1.102	6.496	0.004114	Naalad2
-1.092	4.757	0.09936	Prkcq
-1.089	3.481	0.5326	Cacng8
-1.084	3.414	0.1894	Trmt10a
-1.08	2.971	0.3053	Banf1
-1.08	2.892	0.4644	Gm12861
-1.076	3.594	0.1901	Nrxn3
-1.072	3.612	0.1289	Myc
-1.065	2.994	0.3635	Pmaip1
-1.062	2.772	0.3166	Cops9
-1.059	3.469	0.3762	Gm12166
-1.058	3.628	0.1336	Zfyve21
-1.054	4.762	0.01993	Atf4
-1.052	12.91	0.04005	Lars2
-1.049	5.171	0.1047	Ier5
-1.046	3.006	0.474	Hes1
-1.038	3.846	0.1107	H2az1
-1.033	5.258	0.02334	Adora3
-1.033	3.693	0.3428	Id2
-1.028	3.603	0.2184	Bak1
-1.023	2.843	0.3555	Zfp458
-1.02	4.015	0.1576	Marcksl1
-1.02	3.48	0.1762	Selenon
-1.017	5.043	0.1646	Rps26
-1.015	3.577	0.3864	Chchd2
-1.012	5.517	0.03427	Ppia
-1.008	5.044	0.09936	Rpl9
-1.006	4.281	0.08459	Atp6v1f
-1.003	9.183	0.05449	Gm15564
-1.003	3.295	0.2465	Gm8013
-1.002	7.443	0.00597	Slc2a5
-0.9991	6.043	0.09204	Klf6
-0.997	3.421	0.1973	Rinl
-0.9968	7.214	0.5536	Rn7sk
-0.996	2.83	0.3234	Ndufa1
-0.995	4.613	0.09936	Errfi1
-0.9938	3.58	0.2231	Grcc10
-0.9932	3.068	0.2201	Trmt112
-0.9911	3.913	0.1845	Ndufa4
-0.9908	3.667	0.3291	Gm47469
-0.9899	2.817	0.3646	Pomk
-0.9897	3.477	0.2105	Txnl4a
-0.9897	3.404	0.6134	Sh3bgrl
-0.9883	3.474	0.1826	Ciapin1
-0.9868	2.745	0.8361	Kdm5d
-0.986	3.361	0.2706	ENSMUSG00000120144
-0.986	5.851	0.7465	Ccr6
-0.9845	3.06	0.293	Zbtb22
-0.9802	3.452	0.2361	Gm37376
-0.9785	4.918	0.08512	Nxt2
-0.9724	3.491	0.1988	Snapc5
-0.97	4.432	0.1871	Ets2
-0.9696	3.106	0.311	Spryd7
-0.9671	3.871	0.1345	Ufm1
-0.9617	3.899	0.2142	Rpl27
-0.9567	3.022	0.3438	Dmac2l
-0.9558	5.735	0.1297	Ppp1r10
-0.9524	4.011	0.1474	Crlf2
-0.9522	5.908	0.01355	Rpl14
-0.9505	5.629	0.03858	Ubb
-0.9485	3.231	0.289	Txn1
-0.9428	3.514	0.311	Hint1
-0.9424	3.986	0.1576	Ltbr
-0.9422	3.499	0.2232	Abhd17a
-0.9341	6.532	0.003802	Bhlhe41
-0.9337	3.543	0.1825	Mlx
-0.9332	3.774	0.193	Cox6b1
-0.9259	3.398	0.241	Vopp1
-0.9246	6.844	0.009467	Tlr13
-0.9226	3.029	0.3	Leng1
-0.9213	6.271	0.04822	Bcl2
-0.9209	6.237	0.3965	Gm12865
-0.9189	5.31	0.08577	Txnrd1
-0.9168	6.228	0.517	Rasgef1b
-0.9153	3.414	0.2901	Trim21
-0.9141	3.706	0.2142	Ube2m
-0.914	5.547	0.04732	Dstn
-0.9067	3.537	0.257	Ndufa7
-0.9059	4.93	0.08677	Irf2bpl
-0.9041	5.196	0.08459	Camk2n1
-0.9031	4.03	0.1893	Gtf2f1
-0.9002	5.387	0.08867	Rps27
-0.8988	4.975	0.08693	Nod1
-0.898	6.168	0.01394	Sfi1
-0.8973	4.576	0.2605	Il7r
-0.8939	5.43	0.02492	Dennd2c
-0.8926	4.623	0.1997	Rpl28
-0.8908	4.45	0.08627	Cetn3
-0.8908	3.919	0.2996	ENSMUSG00000121207
-0.8906	5.209	0.1223	Jund
-0.8896	5.883	0.2872	Rgs1
-0.888	4.444	0.8547	Msh5
-0.8878	4.253	0.2336	Ahsa1
-0.8863	5.027	0.07276	Denr
-0.8856	11.7	0.002552	Cst3
-0.8854	3.328	0.2594	Ebpl
-0.8826	3.089	0.3267	Gm42602
-0.8775	4.694	0.1238	Lbh
-0.8764	3.434	0.2609	Slc25a39
-0.8746	3.917	0.2161	Sod1
-0.8732	6.364	0.2755	ENSMUSG00000120580
-0.873	3.504	0.2763	Gm44686
-0.8707	5.801	0.06732	Rplp2
-0.8703	3.227	0.2556	Zbtb21
-0.8689	4.726	0.1598	Hmgn1
-0.8672	5.683	0.1005	Rps11
-0.8649	4.355	0.1567	Osgep
-0.8644	5.407	0.08645	Manf
-0.8619	4.701	0.6188	Gm27008
-0.8617	4.345	0.1223	Psmb8
-0.8561	7.002	0.01614	Ipcef1
-0.8558	3.38	0.3517	Trim17
-0.8553	3.72	0.1745	Med28
-0.8483	5.234	0.09178	Bzw2
-0.8468	6.597	0.04283	Alox5ap
-0.8461	6.698	0.02606	Coro1a
-0.8461	2.792	0.4224	Nubp2
-0.8449	3.546	0.3102	Fosl2
-0.8446	5.495	0.1199	Adrb2
-0.8438	3.516	0.3673	Klhdc8b
-0.8431	4.921	0.1147	Bcl6
-0.842	8.437	0.0007133	Ccr5
-0.8413	4.141	0.4068	Sdf2l1
-0.8395	4.112	0.2436	Cnih1
-0.8384	3.948	0.1709	Arpc5l
-0.836	4.27	0.2777	Tsen2
-0.8356	5.217	0.09063	Sox4
-0.8355	6.243	0.007932	Evi2a
-0.8354	4.86	0.107	Pnp
-0.8292	8.136	0.586	Nrxn1
-0.8277	3.865	0.2338	Gm31243
-0.8264	4.322	0.1407	Rpl39
-0.8249	5.163	0.08544	Serf2
-0.822	3.585	0.517	Gm7854
-0.8215	4.891	0.2221	Celf4
-0.8179	3.505	0.3038	Gm26759
-0.8177	6.501	0.01261	Hsp90aa1
-0.8173	3.721	0.3161	Wdr46
-0.8149	3.315	0.3314	Isoc2a
-0.8147	3.971	0.2736	Dpp3
-0.8106	4.926	0.09246	Pcna
-0.8078	3.872	0.2244	Gsdme
-0.8077	5.829	0.09182	Ccnd1
-0.8064	3.736	0.2106	Sprtn
-0.8064	3.547	0.2535	2810025M15Rik
-0.8064	4.356	0.697	Dusp1
-0.8056	6.833	0.02926	Tspan13
-0.8055	3.239	0.4755	Ccr2
-0.8048	3.231	0.3648	Pick1
-0.8032	3.572	0.9103	Uty
-0.803	5.003	0.1542	Rps25
-0.801	3.302	0.3359	Gm49380
-0.8001	4.825	0.1845	Fhad1
-0.7994	4.084	0.1922	Tprgl
-0.7993	3.397	0.4086	Fam72a
-0.7985	3.975	0.2245	Zfp386
-0.7983	3.502	0.2722	Unc119b
-0.7977	4.379	0.2947	Cited2
-0.7971	5.545	0.04158	9130015G15Rik
-0.7969	3.833	0.5357	Gm37168
-0.7958	5.415	0.1018	Map3k20
-0.793	5.728	0.03352	Gngt2
-0.7923	4.062	0.1946	BC031181
-0.7916	3.517	0.3862	Raet1e
-0.7884	9.327	0.03858	Plek
-0.7869	4.458	0.1432	Eif3d
-0.7853	3.257	0.3864	Psmd9
-0.7806	4.902	0.08685	Tuba1b
-0.7806	4.005	0.2219	Ciao2a
-0.7794	3.042	0.3222	Mrps14
-0.779	3.699	0.2433	Ech1
-0.7777	4.86	0.1015	Jpt1
-0.7763	5.263	0.0704	Nudc
-0.774	5.832	0.2734	Rpl13
-0.7737	4.877	0.08577	Lfng
-0.7736	6.082	0.03352	Fam111a
-0.7726	3.188	0.3645	Armc10
-0.7724	3.767	0.3297	Notch4
-0.7694	4.243	0.3022	Tpm4
-0.7679	9.482	0.00713	Tmem119
-0.7672	4.048	0.1988	Ckap4
-0.7669	8.375	0.1398	Bank1
-0.7667	5.338	0.1411	Cct6a
-0.7659	4.164	0.2755	Lrrc25
-0.7635	4.288	0.1571	Atp5h
-0.7634	3.742	0.3776	2810013P06Rik
-0.7624	6.814	0.05449	Ogfrl1
-0.7589	8.904	0.004114	P2ry13
-0.7589	6.393	0.0704	Actg1
-0.7587	6.838	0.07079	Pfn1
-0.7584	8.312	0.007476	Ssbp2
-0.7584	6.175	0.08577	Fads1
-0.7581	3.875	0.4105	Col25a1
-0.758	6.687	0.04939	Sgk1
-0.758	3.809	0.1973	Gm13269
-0.7576	5.081	0.09936	Sar1a
-0.7576	4.899	0.1487	Rps17
-0.7568	7.953	0.04822	Hspa5
-0.7554	5.603	0.457	Nfkbiz
-0.755	4.286	0.2059	Rpl38
-0.7544	3.719	0.3851	Uqcrh
-0.7541	3.755	0.2417	Gm20275
-0.754	5.634	0.07499	Tnfsf13b
-0.7534	3.697	0.2915	Akr1b3
-0.7528	3.142	0.4537	Fads6
-0.752	7.778	0.04732	Gcnt1
-0.7509	3.753	0.2228	Naxe
-0.7504	5.525	0.2887	Furin
-0.7497	5.043	0.2947	Rps19
-0.7497	3.472	0.5021	Idh3a
-0.7491	4.145	0.3441	Edf1
-0.7484	5.756	0.0668	Syngr2
-0.7484	6.6	0.2555	Rps4x
-0.7483	6.86	0.06923	Etv5
-0.7464	5.521	0.05729	Etv3
-0.7454	7.943	0.08064	Rin2
-0.7454	4.017	0.2387	Gtf2b
-0.745	6.637	0.03647	Sowahc
-0.7437	5.761	0.08539	Igsf8
-0.7435	3.335	0.3772	Impdh2
-0.7434	5.971	0.2163	Btg2
-0.7406	6.222	0.08539	Rpl23
-0.738	3.206	0.4796	Txndc17
-0.7378	3.279	0.3647	Dars2
-0.7348	3.625	0.2935	Slc25a32
-0.7337	5.893	0.08459	Hsd17b12
-0.7298	4.026	0.2387	Elovl1
-0.7287	3.691	0.4613	Gm44710
-0.7278	4.145	0.2901	Sde2
-0.7261	5.085	0.09936	Chmp1b
-0.7251	3.464	0.3266	Tmem179b
-0.7244	5.398	0.06978	Gm44250
-0.723	3.469	0.302	Smpd1
-0.7226	9.834	0.007932	Tmsb4x
-0.7224	3.329	0.449	Parp16
-0.7208	3.823	0.3076	Oaz2
-0.7204	3.736	0.3811	Ifi35
-0.7204	2.625	0.5707	Dusp10
-0.7197	3.195	0.3638	Zfand1
-0.7189	4.432	0.5523	Sh3rf1
-0.7187	5.556	0.2996	Slc25a25
-0.7182	4.372	0.2221	Cd276
-0.7182	3.664	0.4084	Csrnp1
-0.717	4.468	0.1554	Nop53
-0.7159	5.082	0.1574	Mmp2
-0.7156	6.659	0.02852	Commd8
-0.7148	7.533	0.03647	Fcgr2b
-0.7145	4.424	0.2232	Plk3
-0.7141	6.406	0.03858	Sting1
-0.7139	6.144	0.1861	Gcnt2
-0.7136	5.065	0.1372	Chtf8
-0.7127	3.659	0.3021	Tfam
-0.7121	5.123	0.1491	Cln5
-0.7111	3.483	0.3673	Phospho1
-0.711	7.49	0.05419	Tyrobp
-0.7109	3.907	0.2118	Atxn7l3
-0.7109	4.287	0.2583	Psma4
-0.7105	5.659	0.05769	Hspd1
-0.7105	3.272	0.4369	Hmox1
-0.7098	6.576	0.159	Zfand5
-0.7085	3.45	0.4406	Gm15880
-0.7068	5.774	0.09936	Tgm2
-0.7064	6.095	0.03647	Btg1
-0.7051	5.098	0.1411	Cd302
-0.7051	4.651	0.3152	Rps20
-0.7047	3.294	0.501	Haao
-0.7044	5.456	0.1709	Dnajb11
-0.7037	3.127	0.4888	Gm4890
-0.7037	3.919	0.5481	Ccl4
-0.702	3.715	0.3345	Sf3a2
-0.7016	4.518	0.311	Mmd
-0.7011	4.555	0.243	Eci2
-0.7009	3.347	0.3995	Commd6
-0.7002	5.554	0.1297	Pnrc1
-0.7	5.322	0.1243	Rpl6
-0.6997	4.367	0.2025	Hspe1
-0.6995	4.174	0.2282	Cebpb
-0.6987	4.941	0.1165	Arf6
-0.6985	9.905	0.3444	C1qa
-0.6965	4.045	0.2922	Slco1a4
-0.6944	6.574	0.08459	Rpl21
-0.6936	4.74	0.1345	Tab3
-0.6935	3.468	0.3955	Zfand2a
-0.6929	3.823	0.4006	Ndufb9
-0.6927	6.6	0.1238	Mir142hg
-0.6917	4.981	0.2788	Myl12a
-0.6909	3.725	0.3671	Nsmce4a
-0.6906	3.325	0.3986	Mrpl13
-0.6901	3.362	0.4912	Sfxn3
-0.6897	4.292	0.2149	Ubald1
-0.6889	4	0.3275	Ddx54
-0.6887	3.703	0.3777	Fads3
-0.6886	4.385	0.2166	Ei24
-0.6886	3.128	0.5586	Tnf
-0.6882	4.377	0.1995	Tmem100
-0.6868	3.595	0.3427	Nufip1
-0.6868	3.423	0.4076	Gm49987
-0.6865	10.53	0.05333	P2ry12
-0.686	6.346	0.4086	Nlrp3
-0.6851	5.045	0.08727	Acvr1b
-0.6845	4.955	0.228	Jak3
-0.6841	4.645	0.425	Tmed4
-0.6837	3.314	0.3711	Psenen
-0.6826	4.501	0.2387	Dhx38
-0.6825	3.479	0.4315	Map3k19
-0.6824	4.832	0.1162	Rab1b
-0.6821	6.447	0.1172	Tom1l1
-0.6815	4.625	0.1582	Atraid
-0.6815	3.857	0.3188	Sap18
-0.6814	3.699	0.3314	Nup210
-0.6813	4.319	0.2481	Slc25a30
-0.6809	4.079	0.3183	Usp50
-0.6803	4.733	0.1825	Slc25a4
-0.68	3.975	0.2457	Ebna1bp2
-0.6799	5.696	0.1147	Rpl11
-0.6792	5.361	0.1348	Rsl1d1
-0.6783	3.687	0.3631	Mrrf
-0.6781	3.36	0.4088	Asf1a
-0.6775	3.963	0.2818	Tbcb
-0.6767	7.831	0.4991	Hpgd
-0.6757	7.301	0.159	Rpl4
-0.6748	6.28	0.09936	Sall3
-0.6742	5.856	0.159	Gnb2
-0.6738	3.357	0.4991	Osm
-0.6733	5.505	0.152	Rpl37
-0.6726	6.243	0.2244	Rplp1
-0.6716	5.81	0.4342	Rpl32
-0.6714	6.192	0.1863	Rpl18a
-0.6709	3.268	0.4945	ENSMUSG00000120058
-0.67	3.953	0.3898	Igfbp4
-0.6699	3.808	0.3159	Isyna1
-0.6691	9.33	0.3564	Il31ra
-0.6687	5.869	0.05081	Slc25a5
-0.6682	3.926	0.3076	Tmem70
-0.6672	5.409	0.241	Rpl41
-0.6667	4.835	0.1598	Inppl1
-0.6667	3.453	0.4414	1700001C19Rik
-0.6665	5.098	0.1242	Selenok
-0.6656	5.956	0.09182	Rpl17
-0.6653	5.641	0.1991	Ccl6
-0.6652	6.299	0.03858	Rnls
-0.6652	3.429	0.4399	Zdhhc4
-0.6651	3.656	0.3957	3110009E18Rik
-0.6643	3.444	0.3957	Rbm15b
-0.6625	4.573	0.1646	Topors
-0.6618	7.685	0.02852	Med12l
-0.6591	6.035	0.1147	Pcbp1
-0.6589	8.95	0.009384	Rnase4
-0.6588	4.85	0.1218	Oaz1
-0.6576	3.32	0.482	Ranbp3l
-0.6575	3.188	0.457	Paip2b
-0.6574	3.827	0.3557	Zfp622
-0.6571	3.693	0.3673	Klc4
-0.6551	5.756	0.1147	Stk17b
-0.6545	5.061	0.2273	Zmat2
-0.6541	3.535	0.4013	Zfp955a
-0.654	3.724	0.2925	Polr3k
-0.6522	3.691	0.4979	Txn2
-0.6516	5.349	0.1894	Ltc4s
-0.6511	4.595	0.2176	Ran
-0.6511	3.275	0.5552	Cd274
-0.651	7.127	0.3033	Tspan18
-0.6504	3.405	0.3879	Rraga
-0.6501	4.014	0.4346	Nme2
-0.6495	2.84	0.6178	Tomm22
-0.6482	4.227	0.3711	Otub1
-0.6472	4.449	0.2687	Lrrc4
-0.6468	4.136	0.3151	Scrn3
-0.6467	4.111	0.2435	Spcs1
-0.6464	4.307	0.289	Btf3
-0.6453	3.552	0.4888	Etfb
-0.6449	5.947	0.228	Rps29
-0.6434	3.629	0.3096	Cdca7
-0.6433	5.701	0.1238	Eif5a
-0.6429	8.024	0.009467	Tnfrsf21
-0.6416	16.88	0.03858	Rn18s-rs5
-0.6414	3.421	0.3691	Eif4e3
-0.6412	4.988	0.4688	Cass4
-0.6411	5.215	0.1238	Cwc15
-0.6408	7.137	0.5691	Cd83
-0.6405	7.206	0.03496	Samsn1
-0.6405	5.039	0.277	Kcnj2
-0.6403	3.73	0.4098	Fzd4
-0.6397	5.38	0.1587	Bcr
-0.6392	7.722	0.01612	Hspa8
-0.6387	3.191	0.5099	Chrac1
-0.6385	7.479	0.03858	Itm2c
-0.6383	4.62	0.2687	Dlg3
-0.6377	5.77	0.1646	Plekho2
-0.6366	5.783	0.3176	Rps5
-0.6364	3.426	0.354	Bmyc
-0.6356	3.822	0.3368	Tmx2
-0.6353	4.492	0.4468	Zc3h12a
-0.6351	3.784	0.3711	Fbxl14
-0.6347	4.208	0.3194	Mak16
-0.6342	5.839	0.1432	Rap1gap2
-0.6328	5.86	0.3266	Rplp0
-0.632	3.38	0.3711	Yif1b
-0.6316	6.145	0.08577	Tubb5
-0.6313	5.695	0.1584	Rps27a
-0.631	4.922	0.1954	Nacc1
-0.6305	4.129	0.2448	Cnpy2
-0.6305	4.305	0.2568	Nsa2
-0.63	5.019	0.2221	Rps15
-0.6296	5.995	0.1047	G3bp1
-0.6292	3.885	0.3151	Cyth2
-0.6292	4.717	0.3566	Tpi1
-0.6288	3.406	0.4031	Wtip
-0.6287	9.262	0.1773	Filip1l
-0.6286	5.571	0.1516	Cdc37
-0.6281	3.809	0.3312	Psmb3
-0.6279	4.787	0.2719	Ppp1r3b
-0.6277	4.7	0.2318	Gm49368
-0.6276	6.435	0.06365	Tmx4
-0.6274	4.882	0.1826	Sptssa
-0.6271	3.504	0.3604	Irf2bp1
-0.6268	3.237	0.5288	Ndufb7
-0.6264	3.216	0.4817	Snrpc
-0.6247	5.679	0.09182	Vps33a
-0.6242	11.49	0.3479	Gphn
-0.6241	5.393	0.1407	Cggbp1
-0.6225	4.188	0.2417	Zfp513
-0.6222	4.977	0.1741	Psmc2
-0.6221	3.228	0.4892	Sesn2
-0.6219	3.844	0.6895	Ripor2
-0.6205	5.109	0.1644	Prkab1
-0.6202	11.13	0.02949	Actb
-0.6198	4.548	0.2447	Apobr
-0.6198	3.961	0.3107	Tmem41b
-0.6197	5.452	0.1542	Rpl22
-0.6187	5.127	0.1253	Tti1
-0.6186	5.689	0.159	Arpc3
-0.618	4.475	0.241	Rft1
-0.6172	4.504	0.2334	Smim10l1
-0.6172	4.612	0.2901	Rpl30
-0.6168	3.772	0.3161	Prmt1
-0.6167	4.642	0.2417	Rpl18
-0.6162	6.243	0.1349	Vps37b
-0.6157	3.905	0.345	Cnr2
-0.6149	5.68	0.09182	Ganab
-0.6144	4.274	0.2338	Phyh
-0.614	4.864	0.323	Atp8b1
-0.6138	3.611	0.4658	Oaf
-0.6127	5.075	0.7269	Lrguk
-0.6122	6.244	0.5088	Srgn
-0.6118	3.219	0.4833	Mogs
-0.6105	3.367	0.4342	Oat
-0.6102	7.046	0.08847	Laptm4a
-0.6093	5.756	0.4306	Creb5
-0.6092	3.176	0.5571	Peg10
-0.609	4.527	0.3056	Rnf187
-0.6085	4.963	0.1938	Dnttip2
-0.6084	3.92	0.3521	Cox7b
-0.608	4.966	0.2862	Hrh2
-0.607	4.805	0.1755	Tuba1a
-0.6065	5.395	0.2263	Rpl7
-0.6063	6.427	0.5956	Arhgap15
-0.6059	4.936	0.1734	Adprh
-0.6058	3.963	0.3296	Tm2d2
-0.6041	4.932	0.1407	Kdelr1
-0.6035	5.529	0.1673	Hhex
-0.6034	3.526	0.3705	Rpap1
-0.6022	4.308	0.2728	Gsr
-0.5993	4.293	0.2755	Nelfb
-0.5987	4.453	0.3495	Zswim4
-0.598	3.685	0.4347	Bax
-0.5971	5.433	0.2417	Rpl7a
-0.5968	5.287	0.2674	Rpl19
-0.5966	4.154	0.3329	Zfp703
-0.5963	3.321	0.4657	Mrpl43
-0.596	6.495	0.1138	H3f3b
-0.5944	3.28	0.4367	Gvin2
-0.5937	4.594	0.2687	Tmem9b
-0.5936	5.277	0.2142	Spns2
-0.593	6.441	0.08867	Gng10
-0.5926	5.211	0.278	Rps15a
-0.5925	7.049	0.06251	Myo1b
-0.5919	3.781	0.4016	Atad3a
-0.5918	7.03	0.05449	Ywhab
-0.5917	7.827	0.01722	Rhoa
-0.5917	4.695	0.2453	Slbp
-0.5909	3.67	0.4658	Eif2b4
-0.5898	5.753	0.08624	Tmem86a
-0.5892	5.583	0.302	Rpl8
-0.589	5.239	0.1988	Csf2rb2
-0.5889	5.635	0.1755	Sub1
-0.5883	4.346	0.3166	Nsun3
-0.5874	3.871	0.4515	Adpgk
-0.5874	3.433	0.4529	Phospho2
-0.5873	3.398	0.4418	Tlr6
-0.5868	5.236	0.1487	Srsf9
-0.5865	8.131	0.03298	Cap1
-0.5865	4.417	0.2736	AI987944
-0.5863	4.984	0.3378	Smim3
-0.5862	3.82	0.4173	Acad11
-0.5859	4.522	0.2701	Psmc5
-0.5856	3.707	0.3626	Cyc1
-0.5855	6.624	0.1267	Rpl3
-0.5849	5.412	0.1967	Bag1
-0.5849	3.823	0.4269	Yeats4
-0.5836	4.332	0.2963	Bud31
-0.5835	5.038	0.3297	Tgif1
-0.5834	3.477	0.4468	Gpaa1
-0.5826	5.371	0.4132	Rpl12
-0.582	3.68	0.4367	Ndufa6
-0.5819	4.969	0.2402	Nagpa
-0.5817	4.836	0.2531	Rpl35a
-0.5815	3.983	0.3297	Ankra2
-0.5815	3.421	0.462	Haus7
-0.5811	8.289	0.09728	Calr
-0.581	4.499	0.3291	Pqbp1
-0.5806	4.639	0.4241	Naaa
-0.5797	6.615	0.1047	Soat1
-0.5797	3.704	0.501	Chmp7
-0.5796	3.597	0.4322	Pdp2
-0.5796	3.732	0.4803	Get3
-0.5794	3.914	0.3909	Pilra
-0.5783	5.078	0.198	Tpbgl
-0.5782	3.338	0.5569	Dpagt1
-0.5781	5.142	0.2788	Kxd1
-0.578	3.864	0.3368	Ubl5
-0.5777	6.007	0.2338	Pdia4
-0.5767	3.731	0.3894	Ubald2
-0.5761	6.233	0.09936	Eif1
-0.5759	3.476	0.4105	Gm20721
-0.5758	2.923	0.5607	Commd4
-0.5747	4.308	0.3291	Prdx5
-0.5745	3.789	0.3291	Zkscan7
-0.5727	5.12	0.2862	Prickle1
-0.5724	5.003	0.2059	Eno1
-0.5715	3.762	0.4447	Creld2
-0.5714	5.869	0.1172	Clptm1
-0.5712	3.849	0.3454	Mttp
-0.5702	3.441	0.4583	Zfp868
-0.5698	2.599	0.791	H2-K2 - ENSMUSG00000067203
-0.5696	4.055	0.3638	Alg1
-0.5688	4.619	0.3037	Sirt7
-0.5677	7.435	0.1988	Slc15a3
-0.5675	3.657	0.428	Gm27201
-0.5666	3.815	0.354	Arrdc4
-0.5664	10.33	0.00717	Selenop
-0.5656	5.585	0.4486	Dnajb4
-0.5654	4.381	0.3007	Slc35b2
-0.5649	3.573	0.4658	Oprm1
-0.5642	3.294	0.5493	1600012H06Rik
-0.564	5.661	0.23	Sash3
-0.564	3.512	0.5169	2210016L21Rik
-0.5637	6.656	0.3076	Pdia6
-0.5634	3.96	0.4153	Atf6b
-0.5633	4.626	0.354	Ankmy2
-0.5628	4.046	0.3555	Chml
-0.5624	4.847	0.241	Emc7
-0.5624	4.493	0.277	Rps28
-0.5622	4.136	0.4122	Donson
-0.5609	4.511	0.2728	Rbm15
-0.5594	5.174	0.2192	Tspan31
-0.559	7.399	0.1609	Cfl1
-0.5582	5.048	0.2371	Cers2
-0.5576	3.384	0.4829	Slc25a38
-0.5573	3.51	0.4994	Gm10848
-0.5567	3.907	0.3469	Isg20l2
-0.5549	3.975	0.3476	Gpx4
-0.5548	3.677	0.4429	Usp39
-0.5544	8.71	0.2028	Pdia3
-0.5543	5.278	0.3495	Rps6
-0.554	5.326	0.241	Ppib
-0.554	4.5	0.3862	Rpl35
-0.5532	9.02	0.07221	Hsp90b1
-0.5532	3.393	0.5837	Serpinf1
-0.5531	3.175	0.6053	Cdk5
-0.5528	3.675	0.5064	Dynll1
-0.5526	8.278	0.03997	Bin2
-0.5525	3.157	0.5523	Mcm4
-0.5524	3.803	0.4486	Zfp595
-0.552	3.469	0.4919	Nans
-0.5514	6.6	0.1064	Evi2
-0.5513	3.688	0.4068	Ptp4a1 - ENSMUSG00000026064
-0.5513	3.963	0.4366	Poldip2
-0.5511	5.819	0.124	Tnfrsf1a
-0.5508	5.097	0.3149	Cox4i1
-0.5503	4.311	0.4584	Coq10b
-0.5497	3.268	0.4583	Ap1g2
-0.5494	4.358	0.3977	Klhl25
-0.5489	6.14	0.1594	Spred2
-0.5489	3.608	0.4993	Hmgb2
-0.5481	3.511	0.5339	Psmb6
-0.548	5.589	0.2004	Rps12
-0.548	4.208	0.3403	Ints7
-0.5478	6.141	0.3268	Fau
-0.5474	4.403	0.3473	Psmd8
-0.5467	5.067	0.2481	Ppp1ca
-0.5464	4.293	0.3594	Fam3a
-0.546	3.232	0.5961	Zbtb49
-0.5454	4.52	0.2872	Eif3f
-0.5454	3.574	0.4468	Efnb1
-0.5453	3.693	0.4444	Cdc14b
-0.5447	5.268	0.2706	Rpl31
-0.5445	4.956	0.277	Psmd12
-0.5444	7.692	0.138	Rgs2
-0.5442	3.232	0.4888	Rcc1
-0.544	4.948	0.2489	Syf2
-0.5438	3.528	0.5049	C1qbp
-0.5435	4.119	0.3291	Bcas2
-0.5432	8.081	0.08459	App
-0.5432	3.506	0.4658	Klhl15
-0.5429	4.438	0.3076	Cstf2
-0.5425	4.845	0.406	Zfp40
-0.5423	7.983	0.1254	Hsp90ab1
-0.5419	4.744	0.277	Cdk5rap1
-0.5419	4.36	0.3763	Nucb2
-0.5418	4.612	0.2913	Golt1b
-0.5411	5.894	0.2728	Lypd6
-0.5399	3.268	0.5961	Slfn2
-0.5386	4.063	0.5166	Zbtb43
-0.5385	5.351	0.2106	Drg1
-0.5382	4.495	0.3197	Dad1
-0.5379	5.214	0.2768	D130009I18Rik
-0.5376	4.718	0.2788	Gpat4
-0.5374	9.012	0.03647	Rtn1
-0.5365	5.146	0.2609	Rabgef1
-0.536	5.582	0.1867	Nsun2
-0.5356	3.275	0.474	Polr2c
-0.5356	3.509	0.4833	Xntrpc
-0.5352	3.746	0.5619	E4f1
-0.5348	3.19	0.5294	Hirip3
-0.5344	10.59	0.01573	Lgmn
-0.5343	4.205	0.3297	Ramp2
-0.5341	3.568	0.457	0610010K14Rik
-0.5339	3.197	0.5119	Mrps2
-0.5334	6.377	0.1596	Azin1
-0.5334	5.686	0.241	Zeb2os
-0.5327	5.591	0.252	Rpl26
-0.5326	5.707	0.1521	Ripk2
-0.5316	4.198	0.4406	Cox6a1
-0.5312	5.873	0.1726	Xbp1
-0.5308	3.878	0.4486	Gm33100
-0.5307	3.253	0.4978	Plekhg2
-0.5305	3.94	0.5524	2410006H16Rik
-0.5298	6.082	0.1238	Spcs3
-0.5296	4.506	0.3604	Hgsnat
-0.5294	5.893	0.1289	Limd2
-0.5294	3.292	0.6623	Pvr
-0.5291	7.078	0.1165	Mapre2
-0.529	6.328	0.1083	Ccdc47
-0.5282	3.559	0.449	Tada3
-0.528	3.601	0.4862	Ints11
-0.5279	5.222	0.1894	Aamp
-0.5278	3.474	0.5648	Pard3bos1
-0.5274	4.433	0.3725	Snrpa
-0.5264	8.108	0.04395	Atg10
-0.5263	4.152	0.3902	Coq5
-0.5261	5.073	0.3495	Hebp1
-0.5251	4.883	0.2481	Slc35b4
-0.5251	3.841	0.4644	Slc25a23
-0.5247	8.886	0.0848	Fam102b
-0.5244	6.666	0.1083	P4hb
-0.5243	5.677	0.1753	Flii
-0.524	5.584	0.1954	Ano10
-0.5239	6.283	0.1992	Rps3
-0.5232	4.823	0.2417	Cdk5r1
-0.523	3.754	0.4658	Nubp1
-0.5228	3.852	0.4664	Prox2
-0.5224	4.374	0.3648	Anxa4
-0.5221	4.428	0.3965	Zfp65
-0.5208	4.76	0.3268	Gba
-0.5206	6.571	0.1954	Mapkapk2
-0.5204	6.015	0.19	Arpc4
-0.5198	10.09	0.06467	Rapgef5
-0.5196	4.319	0.3775	Fkbp2
-0.5195	6.036	0.2004	Ddx21
-0.5194	4.001	0.4295	Slc35e3
-0.5194	3.325	0.6101	Adhfe1
-0.5193	3.599	0.589	Fam89b
-0.5191	8.339	0.02949	Gnai2
-0.5191	4.683	0.3166	1810030O07Rik
-0.5182	4.968	0.241	Mlf2
-0.5175	4.132	0.4667	Sult1a1
-0.5171	6.837	0.1238	Hnrnpl
-0.5152	4.306	0.3908	Pck2
-0.515	3.188	0.5247	Ddx41
-0.5146	5.615	0.2302	Clptm1l
-0.5146	3.599	0.5458	ENSMUSG00000120754
-0.514	3.605	0.4695	Naf1
-0.514	4.063	0.5229	Rpl36
-0.5139	8.895	0.04265	Canx
-0.513	4.485	0.317	Mcrip1
-0.5126	6.535	0.1474	Tmed5
-0.5121	4.718	0.3495	Sap30bp
-0.5121	3.4	0.5354	Ift20
-0.512	8.137	0.07105	Efhd2
-0.5119	5.423	0.371	Rps7
-0.5117	6.278	0.1621	St3gal2
-0.5115	3.671	0.4899	Natd1
-0.5114	4.796	0.3604	Pdia5
-0.5113	6.684	0.09728	Ociad1
-0.5111	4.384	0.3604	Trim47
-0.5105	7.522	0.1894	Txnip
-0.5105	3.996	0.4146	Dda1
-0.5097	6.296	0.1211	Saraf
-0.5097	5.952	0.1414	Lman1
-0.5093	3.848	0.5837	Megf11
-0.5086	4.087	0.3727	Ormdl1
-0.5086	3.441	0.6486	Dus2
-0.5083	5.116	0.2835	Rps2
-0.5079	4.489	0.3291	Sec13
-0.5078	3.578	0.4644	Nabp1
-0.5071	5.34	0.3477	Mob4
-0.507	7.444	0.08577	Spred1
-0.5069	5.566	0.19	Cln8
-0.5063	3.015	0.604	Ccdc86
-0.5059	3.836	0.5881	Gm8091
-0.505	4.793	0.3835	Gde1
-0.5049	7.228	0.05694	Ust
-0.5049	3.708	0.4724	Prpf4
-0.5046	5.404	0.3149	Asah2
-0.5043	6.379	0.2605	Eprs
-0.5029	3.513	0.5166	Atp5o - ENSMUSG00000022956
-0.5027	4.999	0.2862	Trim28
-0.5018	11.17	0.152	Ctss
-0.5014	4.378	0.385	Ubqln2
-0.5014	3.757	0.5088	Chmp1b2
-0.5012	5.599	0.228	Tob2
-0.5012	5.084	0.3103	Psmd2
-0.5012	4.32	0.3495	Katnbl1
-0.5006	8.102	0.04899	Gnas
-0.5004	4.481	0.3944	Nup50
-0.5003	6.088	0.1479	Gm49797
-0.5002	5.666	0.2973	Rps14
-0.5002	3.724	0.495	Ndufv3
-0.5001	3.817	0.4187	Rwdd4a
-0.4993	7.989	0.0532	Ctsc
-0.4992	5.673	0.515	Tpt1
-0.498	5.448	0.5533	Rpsa
-0.4975	6.235	0.1345	Clic1
-0.4974	3.479	0.5532	Ap5z1
-0.4971	4.773	0.32	Poglut3
-0.4971	4.534	0.3683	Chmp2b
-0.4971	3.555	0.4818	2310033P09Rik
-0.4969	4.536	0.4006	Fam217b
-0.4969	4.228	0.416	Ugdh
-0.4967	5.128	0.2236	Wbp4
-0.4959	3.297	0.5339	Mymk
-0.4954	3.94	0.6417	Tmtc4
-0.495	5.059	0.2915	Atp6v1g1
-0.4944	4.744	0.3249	Eef1d
-0.4941	4.747	0.4875	Scp2
-0.4934	4.603	0.3241	Rnf34
-0.493	3.6	0.5926	B4galnt1
-0.4928	4.962	0.3297	Arl5b
-0.4926	6.279	0.1879	Selenof
-0.4925	4.137	0.4241	Ccar2
-0.4919	9.042	0.4486	Eef1a1
-0.4919	3.946	0.4803	Dok1
-0.4915	3.428	0.5948	Mrpl52
-0.4912	6.025	0.1336	Prag1
-0.4912	3.256	0.6101	Csnk2b
-0.491	2.992	0.6101	Sco1
-0.49	4.881	0.3572	Casp4
-0.49	4.694	0.4503	Gpr84
-0.4899	3.93	0.457	Psmb4
-0.4897	3.683	0.4685	Rab5if
-0.4896	5.199	0.28	Stk38l
-0.4894	3.821	0.4644	Msantd4
-0.4894	3.619	0.5262	Atp5d
-0.4893	4.007	0.3997	Idh3b
-0.4893	4.855	0.4658	Ifi30
-0.489	4.984	0.4767	Atrnl1
-0.4883	7.069	0.244	Arhgdia
-0.488	4.278	0.4315	Bap1
-0.487	3.083	0.6666	Vat1
-0.4854	3.525	0.6016	Smim7
-0.4853	4.106	0.4963	Sdhaf2
-0.4852	6.772	0.2786	Bsg
-0.4852	4.336	0.4306	Jam3
-0.485	4.132	0.4599	Ncs1
-0.4847	3.323	0.6101	Gm19710
-0.4845	6.469	0.2283	Sdf4
-0.4841	5.963	0.3836	Rack1
-0.484	3.274	0.5707	Eif1ad
-0.4836	4.886	0.3276	Tle5
-0.4834	8.821	0.1058	Cables1
-0.4832	7.814	0.2338	Ly6e
-0.4826	3.573	0.5397	Cenpb
-0.4823	5.432	0.2106	Gm7072
-0.4821	4.526	0.4315	Ccdc58
-0.4821	4.379	0.4418	Masp1
-0.4811	4.408	0.3593	Dbt
-0.4811	4.834	0.4803	Ldha
-0.481	5.287	0.2835	Tal1
-0.4799	4.236	0.4007	Pirb
-0.4797	4.418	0.4723	Nrbf2
-0.4796	4.115	0.4658	Zfp141
-0.4791	8.93	0.04378	Basp1
-0.4781	5.386	0.1861	Tnfrsf13b
-0.4778	5.506	0.2422	Tspan3
-0.4774	6.189	0.278	Rps8
-0.4771	4.393	0.3441	Klk8
-0.4761	3.341	0.6111	B430010I23Rik
-0.4756	5.588	0.2502	Cd14
-0.4754	5.226	0.3449	Rpl24
-0.4752	7.161	0.09759	Ptms
-0.475	6.944	0.299	Aif1
-0.4749	4.395	0.4892	Paqr3
-0.4746	3.207	0.6195	Cry2
-0.4742	4.263	0.4356	Nfkb2
-0.4739	3.969	0.4644	Slc31a2
-0.4736	3.469	0.5902	Phf1
-0.4735	6.355	0.1542	Atp5b
-0.4729	6.753	0.1554	Arhgap4
-0.4729	4.429	0.3671	Galnt4
-0.4727	9.839	0.08459	Selplg
-0.4723	7.013	0.2709	Pea15a
-0.4718	5.122	0.2887	Kdm6b
-0.4717	4.353	0.3365	Nrep
-0.4717	3.378	0.5458	Rnaseh1
-0.4714	4.766	0.3161	Psmd7
-0.4706	6.679	0.1238	Morf4l1
-0.47	4.263	0.4599	Nol11
-0.4699	4.007	0.4919	Lamtor4
-0.4697	7.271	0.1047	Ifnar2
-0.4691	3.48	0.4888	Aasdhppt
-0.4688	5.065	0.3249	Cct5
-0.4683	7.034	0.1047	Tmed10
-0.4678	6.465	0.1336	Spcs2
-0.4675	6.52	0.1587	Tapbp
-0.4674	6.192	0.2925	Nr6a1os
-0.4674	4.081	0.4685	Rpl27a
-0.4667	5.309	0.2969	Prdx1
-0.4663	4.298	0.4089	Bub3
-0.4661	5.033	0.2887	Jup
-0.4657	7.699	0.241	Npc2
-0.4649	4.555	0.4174	Gpr157
-0.4648	4.696	0.4702	Shc1
-0.4647	6.524	0.189	Rps9
-0.4647	5.645	0.2728	Micos10
-0.4645	5.208	0.3149	Mid1ip1
-0.4645	4.33	0.4269	Agpat1
-0.4638	8.86	0.5294	Olfml3
-0.4636	6.03	0.2133	Tmem176b
-0.4627	10.36	0.05694	Sparc
-0.4626	5.675	0.2417	Hprt
-0.4626	6.081	0.2734	Rab39
-0.4626	4.479	0.3692	Rbm42
-0.4625	4.58	0.3437	Aggf1
-0.4617	4.7	0.3738	Cbx3
-0.4607	6.133	0.2826	Rps23
-0.4607	4.834	0.4803	Cxcl16
-0.4607	4.169	0.5281	Glo1
-0.4605	3.3	0.57	Ndufb10
-0.4595	3.754	0.5331	Ndufs8
-0.4594	5.212	0.3582	Tmem161b
-0.4589	4.215	0.5721	Mydgf
-0.4587	3.138	0.663	Tuba1c
-0.4584	4.413	0.3796	Snrpb2
-0.4583	5.119	0.2862	Myadm
-0.4581	3.822	0.5294	Zfp597
-0.4581	3.559	0.5513	Srp19
-0.4578	5.836	0.2915	Mcfd2
-0.4577	4.185	0.4668	Gtf2e1
-0.4576	5.273	0.457	Lst1
-0.4574	5.895	0.1894	Irf2bp2
-0.4571	5.676	0.1845	Tlr3
-0.4565	8.97	0.1202	Cd81
-0.4562	5.574	0.2433	Gm21970
-0.4561	6.724	0.1542	Prpf8
-0.4561	3.328	0.5712	Gm2237
-0.4559	5.075	0.3943	Tasl
-0.4558	6.426	0.2225	Magt1
-0.4558	3.74	0.5489	Lias
-0.4556	4.76	0.3514	Cul4b
-0.4554	4.096	0.8011	Nr4a1
-0.4547	3.446	0.5762	Tapbpl
-0.454	6.822	0.1147	Hnrnpa3
-0.4539	6.53	0.1156	Arhgdib
-0.4537	4.565	0.4322	Ostc
-0.4536	4.453	0.4562	Ak2
-0.4536	3.806	0.5532	Dus3l
-0.4535	7.57	0.08616	Ywhah
-0.4525	3.492	0.5575	Bag4
-0.4523	6.092	0.1728	Pdk1
-0.452	5.994	0.1745	Wdfy1
-0.4516	6.911	0.1973	Lrrc3
-0.4516	4.925	0.4084	Clec4a2
-0.4514	4.178	0.4113	Cox15
-0.4513	4.598	0.3604	Strip1
-0.4513	4.543	0.4241	Agap2
-0.4508	3.414	0.5401	Zfp87
-0.4507	5.067	0.2922	Cldnd1
-0.4506	3.2	0.6094	Tmem185b
-0.4505	10.11	0.2312	Ubash3b
-0.4501	5.218	0.2925	Tmem248
-0.449	5.849	0.2901	Srpr
-0.4481	5.111	0.3476	Psmb1
-0.4479	6.195	0.2417	Cd34
-0.4478	4.583	0.3671	Ranbp1
-0.4472	4.98	0.3123	Gm16023
-0.4471	7.802	0.3275	Cd164
-0.4467	7.777	0.09182	Ddx3x
-0.4463	3.693	0.5238	Prdx3
-0.446	5.41	0.2176	Morf4l2
-0.446	4.552	0.3618	Bcl7b
-0.446	4.921	0.3957	Dap
-0.4458	10.01	0.05752	Marcks
-0.4457	6.402	0.148	Reep5
-0.4457	5.504	0.2371	Fuca2
-0.4456	6.084	0.1609	Rad23b
-0.4455	4.341	0.4892	Alg11
-0.4453	3.585	0.6085	Cox5a
-0.4443	5.081	0.4252	ENSMUSG00000121501
-0.4443	3.184	0.618	Dvl2
-0.4441	5.606	0.4742	Adcy8
-0.444	4.734	0.323	Puf60
-0.4435	4.953	0.3521	Eif2s1
-0.4432	5.028	0.2915	Txndc12
-0.443	3.185	0.6629	Atp5g3
-0.4428	6.456	0.1863	Ywhag
-0.4428	4.976	0.4322	Tcp1
-0.4425	6.076	0.2387	Zfp706
-0.4422	5.678	0.2231	Slc26a2
-0.442	3.89	0.5117	Atrip
-0.442	4.174	0.5294	Brcc3
-0.441	4.641	0.3476	Smim15
-0.4402	4.444	0.5373	Rpl36a
-0.4402	3.721	0.5876	Srp9
-0.4398	6.148	0.4315	Gas6
-0.4385	4.204	0.4202	Gm20528
-0.4384	7.113	0.6097	Setbp1
-0.4381	7.736	0.1064	Ehd4
-0.4381	3.954	0.6084	Cox6c
-0.438	5.567	0.2689	Spty2d1
-0.4377	7.264	0.1086	Arl6ip1
-0.4377	4.246	0.4658	Med7
-0.4368	4.549	0.4125	Cops5
-0.4367	9.561	0.07276	Klf12
-0.4367	3.936	0.7918	Pxdc1
-0.4363	5.693	0.3972	Lat2
-0.4363	4.087	0.5936	Vps52
-0.4359	6.177	0.3495	Etv1
-0.4356	5.665	0.231	Ppp1r15b
-0.435	4.16	0.5563	Echs1
-0.4349	5.063	0.3291	Tmem268
-0.4347	4.984	0.3279	Ppp4c
-0.4345	7.34	0.7806	ENSMUSG00000120942
-0.434	6.945	0.2499	Ralgps2
-0.4337	8.013	0.1284	Fcgr3
-0.4337	5.912	0.3183	Rps24
-0.4336	4.091	0.5213	Zfp653
-0.4334	3.217	0.6016	Rnf126
-0.4333	6.062	0.3957	Dusp16
-0.4328	4.918	0.4304	Noc2l
-0.4325	4.626	0.3495	Copz1
-0.4325	3.466	0.5667	Mrpl10
-0.432	3.532	0.5619	Snrnp35
-0.4318	5.761	0.2276	Surf4
-0.4318	3.956	0.5835	Mphosph10
-0.4317	4.411	0.397	Ifi27
-0.4314	7.735	0.08924	Adgrg1
-0.4312	3.597	0.5612	F830045P16Rik
-0.4309	6.246	0.1863	Ighm
-0.4308	6.407	0.1432	Slc16a10
-0.4307	4.197	0.5533	Drap1
-0.4296	3.276	0.6079	Gtpbp10
-0.4295	5.713	0.2706	Skp1
-0.4293	4.66	0.3291	Utp11
-0.4289	4.345	0.515	Fam50a
-0.4283	5.055	0.3935	Mknk2
-0.4281	7.366	0.2371	Wsb1
-0.4276	4.497	0.6313	Got1
-0.4275	4.392	0.4551	Cops7a
-0.4273	7.065	0.2282	Klf7
-0.4272	3.428	0.552	Btbd2
-0.4268	3.83	0.629	Ubtd2
-0.4261	6.307	0.1414	Vasp
-0.426	5.092	0.3566	Prkcsh
-0.4254	14.51	0.4625	Cmss1
-0.4252	3.731	0.5781	Tmem154
-0.425	6.572	0.1836	Dnajc3
-0.4245	9.611	0.08677	Itgam
-0.4245	3.692	0.5513	Slc27a4
-0.4243	8.112	0.1243	Rhob
-0.4242	3.174	0.6214	Fancm
-0.4242	4.516	0.7338	Tlr5
-0.4238	7.858	0.3897	Eef2
-0.4236	4.267	0.4803	Ctdnep1
-0.4235	3.702	0.5678	Taf7
-0.4228	7.709	0.1223	Ywhae
-0.4223	3.765	0.6083	Amn1
-0.422	4.738	0.5478	Rps10
-0.4219	7.971	0.094	Rasal2
-0.4216	4.087	0.5254	Cops6
-0.4213	4.004	0.6048	Slc7a6os
-0.4209	5.052	0.3862	Samd4b
-0.4208	3.564	0.5941	LTO1
-0.4205	6.019	0.2289	Rybp
-0.4202	4.664	0.3521	Lsg1
-0.4202	5.009	0.4086	1110004F10Rik
-0.4201	4.763	0.4803	Iscu
-0.4199	6.745	0.1338	Slc44a2
-0.4191	6.712	0.2326	Mcl1
-0.4186	5.209	0.3291	Gm32036
-0.4182	5.941	0.2323	Uba1
-0.418	8.794	0.119	Lims1
-0.4179	3.749	0.5558	Rps6ka4
-0.4179	3.54	0.5936	Rfk
-0.4175	4.034	0.5294	Dhx37
-0.4166	6.681	0.1542	Wdr1
-0.4163	3.554	0.6006	Rhbdf2
-0.4159	3.705	0.6083	Tmem156
-0.4158	5.625	0.2887	Wbp2
-0.4157	4.66	0.5165	Pex3
-0.4156	7.426	0.1047	Npc1
-0.4151	5.007	0.3648	Ctnnbip1
-0.4151	4.948	0.3969	Tap2
-0.4149	6.954	0.2747	C3ar1
-0.4147	5.936	0.2347	Abcd1
-0.4147	4.502	0.4086	Nt5dc3
-0.414	6.818	0.1843	Eif4a1
-0.414	3.384	0.6233	Ramac
-0.4136	5.1	0.3249	Grap
-0.4135	4.775	0.3608	Steep1
-0.4133	4.092	0.4558	Acvrl1
-0.4132	5.113	0.3879	Hnrnpa0
-0.4129	6.694	0.2266	Hspa4
-0.4125	3.683	0.5291	Aktip
-0.4123	4.974	0.4344	Grsf1
-0.4119	5.071	0.3613	Top3b
-0.4119	3.392	0.5654	Dynlt2b
-0.4117	3.155	0.6101	Tmcc3os
-0.4113	3.625	0.5349	Hdac3
-0.4111	6.437	0.1474	Mapre1
-0.411	3.782	0.5964	Lypla2
-0.4107	5.796	0.2387	Pip4k2b
-0.4104	3.783	0.513	Thumpd1
-0.4103	4.933	0.3881	Map1s
-0.4103	4.019	0.5244	Pdcl3
-0.4099	4.275	0.5099	Adh5
-0.4098	7.374	0.1811	Nfe2l2
-0.4098	5.66	0.345	Mapk3
-0.4097	5.703	0.3055	Myo7a
-0.4095	4.223	0.5536	Syvn1
-0.4094	5.337	0.4073	Ddost
-0.4094	3.31	0.5865	Atp5md
-0.4089	6.323	0.1901	Mfap3
-0.4088	4.068	0.5563	Tvp23b
-0.4085	4.089	0.528	Ak1
-0.408	6.216	0.2149	Vdac2
-0.408	2.879	0.7213	Zfp583
-0.4075	6.564	0.1764	Ubqln1
-0.4073	3.772	0.5294	Tsr1
-0.4066	3.743	0.603	Imp4
-0.4063	3.371	0.6247	Pex11b
-0.4061	3.375	0.6319	Tsen15
-0.406	4.822	0.3967	Trappc3
-0.4059	6.216	0.241	Adam15
-0.4057	5.874	0.3149	H13
-0.4056	4.512	0.3955	Mtfr1l
-0.4054	10.08	0.08755	Itm2b
-0.4051	6.133	0.2404	Piezo1
-0.405	4.592	0.434	Rnf24
-0.4048	4.935	0.3648	Zyx
-0.4048	3.401	0.603	Cetn2
-0.4046	3.913	0.568	Rcl1
-0.4042	4.414	0.4819	Tent4a
-0.4042	3.195	0.6239	Cryba4
-0.4039	7.633	0.2155	Pfkfb3
-0.4035	4.696	0.7938	Clybl
-0.4029	3.762	0.5804	Triobp
-0.4027	4.886	0.4888	Slc39a8
-0.4024	5.759	0.3593	Lpar6
-0.4023	11.95	0.08446	Hexb
-0.4022	3.506	0.5678	Oxsm
-0.4018	4.176	0.5792	Atic
-0.4016	8.279	0.1596	Cd53
-0.4014	3.74	0.5709	Lrrc61
-0.4013	6.479	0.2176	Atp6ap2
-0.4013	3.129	0.6863	Bud13
-0.4007	4.055	0.5338	Pter
-0.4007	3.657	0.694	Gm15441
-0.4005	5.538	0.3407	Aars
-0.4005	5.41	0.3772	Txlna
-0.4003	5.205	0.2947	Tm7sf3
-0.4002	4.518	0.4833	Ceacam1
-0.4002	4.178	0.5397	Eif3g
-0.4002	3.615	0.6013	Rbm43
-0.4	5.393	0.3076	Nrbp1
-0.3993	5.634	0.3297	Prps2
-0.3991	6.467	0.2293	A330023F24Rik
-0.399	3.422	0.651	Slc35a4
-0.399	3.107	0.6897	Ubxn8
-0.3989	5.613	0.3909	Srsf7
-0.3986	3.723	0.5936	Klhl36
-0.3979	4.124	0.5965	H1f0
-0.3977	5.613	0.3566	Capns1
-0.3977	4.858	0.4888	Nlrp1a
-0.3969	3.709	0.6423	Fam53c
-0.3968	3.456	0.6163	Slc39a6
-0.3965	5.683	0.3638	Itpripl1
-0.3964	3.223	0.6601	Yju2
-0.396	4.27	0.6194	Ints1
-0.3959	5.143	0.3757	Aup1
-0.3959	4.732	0.503	Ccdc62
-0.3958	4.851	0.4803	Spint1
-0.3956	4.968	0.3638	Dnajc2
-0.3951	2.96	0.7629	Ess2
-0.3941	4.859	0.4613	Dhx32
-0.3939	4.19	0.4685	Abhd13
-0.3938	6.05	0.2764	Eloa
-0.3938	5.607	0.3241	Icosl
-0.3933	8.416	0.1378	Trf
-0.3931	8.577	0.08755	Abi3
-0.3928	5.397	0.411	Gabarap
-0.3928	4.916	0.5256	Rtp4
-0.3923	7.207	0.1894	Ptma
-0.3922	3.652	0.5979	Tpst1
-0.3921	6.699	0.2728	Rpl13a
-0.3921	6.037	0.3297	Serp1
-0.392	8.359	0.1238	Eif4g2
-0.3919	7.062	0.2445	Nckap5l
-0.3912	5.179	0.44	Mesd
-0.3911	4.032	0.6142	Eny2
-0.3911	3.347	0.6532	Rdh5
-0.3909	7.458	0.1811	Ncl
-0.3907	7.51	0.09444	Snx18
-0.3905	5.588	0.3668	Hyou1
-0.3903	4.909	0.4793	Pdcd11
-0.3902	5.457	0.3437	Cct2
-0.3901	5.743	0.287	Heatr1
-0.39	5.016	0.4722	Rcn2
-0.3899	6.76	0.2755	Fcgr1
-0.3898	7.113	0.1532	Ndfip1
-0.3898	4.756	0.44	Cluh
-0.3895	4.91	0.552	Pbx2
-0.3893	6.633	0.1755	M6pr
-0.3891	7.379	0.1348	Stat3
-0.3879	3.66	0.5593	Faim
-0.3875	3.627	0.5771	Utp3
-0.3874	11.63	0.1378	Camk1d
-0.387	7.7	0.2232	Cryl1
-0.387	3.538	0.7401	Unc5cl
-0.3869	7.989	0.08677	Tmbim6
-0.3868	3.211	0.6897	Dnal1
-0.3866	9.389	0.05913	Ddx5
-0.3864	7.345	0.1954	Ppt1
-0.3864	6.951	0.2913	Rel
-0.3863	9.098	0.3419	Gpr34
-0.3862	4.915	0.5659	Tmem176a
-0.3861	5.667	0.331	Map2k2
-0.3859	4.185	0.5462	Tor4a
-0.3856	5.425	0.3988	Cat
-0.3852	4.493	0.4978	Cstf2t
-0.3852	5.912	0.5807	Rpl10
-0.3851	4.543	0.4722	Hdgf
-0.385	4.374	0.517	Tmem19
-0.3848	4.14	0.4672	Gabarapl1
-0.3844	11.18	0.05449	Csf1r
-0.3844	5.347	0.4439	Ergic3
-0.3842	4.701	0.474	Gm21988
-0.3835	4.205	0.5678	Arhgap29
-0.3834	4.041	0.5586	Pigm
-0.3833	4.203	0.5714	Arhgef3
-0.3831	4.012	0.5678	Icmt
-0.3829	4.851	0.488	Ice2
-0.3826	5.56	0.2887	Atp5pb
-0.3826	4.43	0.4903	Necap1
-0.3823	7.675	0.08867	Atf6
-0.3819	6.704	0.1967	Tifab
-0.3818	3.784	0.5999	Slc16a3
-0.3817	6.169	0.2044	Derl1
-0.3814	3.845	0.5575	Atp5j2
-0.3811	3.414	0.6353	Chst12
-0.381	6.167	0.2368	Ppp1r18
-0.3808	4.223	0.526	Vps4a
-0.3808	3.542	0.5781	Ubl4a
-0.3807	3.399	0.672	Ddx49
-0.3805	4.7	0.4076	Fkbp4
-0.3805	4.738	0.4252	Yipf6
-0.3804	7.222	0.2143	Atp6v0a2
-0.3802	2.993	0.7217	ENSMUSG00000120261
-0.3801	4.297	0.4966	Tmub2
-0.3801	4.5	0.5563	Afap1
-0.38	3.379	0.6924	Supv3l1
-0.3795	4.543	0.4773	Rtraf
-0.3795	3.841	0.603	Gng5
-0.3792	4.002	0.5687	Cbll1
-0.3789	6.486	0.2371	Smad7
-0.3784	6.019	0.3521	Rnf149
-0.378	5.407	0.44	Tiprl
-0.3775	6.77	0.1755	Arf1
-0.3774	8.369	0.1211	Tpm3
-0.377	7.77	0.1427	Dtx4
-0.3762	3.812	0.583	Nipsnap3b
-0.3762	3.948	0.8467	Fgl2
-0.3756	5.606	0.3076	Slc45a4
-0.3753	4.807	0.5141	Tes
-0.3752	7.675	0.1345	Hnrnpk
-0.3752	6.518	0.1932	Plod1
-0.3746	6.096	0.3608	Dazap2
-0.3744	6.033	0.4654	Rpl5
-0.3742	3.8	0.6596	Sms
-0.3735	8.438	0.09728	Ifngr1
-0.3734	6.244	0.2706	Rbbp4
-0.3734	5.652	0.3096	Phrf1
-0.3734	6.468	0.4722	Lrp12
-0.3732	4.311	0.5757	Dnajc19
-0.3728	4.68	0.4322	Psmd6
-0.3722	4.981	0.397	Exosc10
-0.3719	4.975	0.4803	Xpo5
-0.3717	4.65	0.49	Fnta
-0.3714	3.783	0.6625	Pcx
-0.3713	3.114	0.7368	Gm10964
-0.3713	5.605	0.7519	Amotl1
-0.3711	3.645	0.6592	Flywch1
-0.3709	5.166	0.4374	Wdr82
-0.3706	4.268	0.5722	Cacybp
-0.3705	3.344	0.628	Znhit1
-0.3704	3.902	0.5644	Bpnt1
-0.3697	7.607	0.6083	Ftl1
-0.3693	6.935	0.193	Ptpn6
-0.3692	4.033	0.5808	Iftap
-0.3688	3.01	0.7924	Cbr4
-0.3686	5.254	0.3314	Idua
-0.3683	6.135	0.2975	Rgmb
-0.3683	4.054	0.6151	Ube2g2
-0.3682	6.586	0.2673	Cnbp
-0.3681	5.419	0.3635	Rab6a
-0.3681	3.361	0.6188	Sharpin
-0.3676	4.904	0.4658	Kcnd1
-0.3667	5.481	0.3638	Snx17
-0.3664	3.424	0.6681	Mfap1a
-0.3662	5.239	0.3876	Utp6
-0.3654	3.905	0.5533	Opa3
-0.3651	4.4	0.5627	C87436
-0.3642	3.862	0.6415	Depdc7
-0.364	9.978	0.1479	Numb
-0.364	3.963	0.5982	Slc39a14
-0.364	3.764	0.6453	Prelid3b
-0.3636	5.172	0.5284	Dnajb9
-0.3633	3.734	0.5931	Ugt1a7c
-0.3631	4.473	0.4803	Wsb2
-0.363	5.4	0.4086	Morrbid
-0.3629	5.203	0.3821	Rap2c
-0.3628	6.387	0.331	Bzw1
-0.3625	7.414	0.163	Caprin1
-0.3623	5.042	0.4214	Psme1
-0.3612	3.21	0.651	G6pc3
-0.3611	8.452	0.1775	Smad3
-0.3611	5.41	0.3851	Mosmo
-0.361	3.971	0.6101	Rad51d
-0.3607	4.366	0.5089	ENSMUSG00000121007
-0.3607	3.218	0.7421	Smdt1
-0.3606	4.139	0.5807	Nosip
-0.3604	4.757	0.5236	Chmp5
-0.3601	5.912	0.3113	Pttg1ip
-0.3601	5.84	0.3909	Orai1
-0.3597	4.598	0.4796	Vps9d1
-0.3593	5.737	0.2915	Nudt4
-0.3586	4.402	0.617	Cox8a
-0.3586	3.599	0.663	Ybx3
-0.3586	3.06	0.7623	Sap30l
-0.3585	4.609	0.517	Mlh3
-0.3584	5.317	0.397	Leprotl1
-0.3581	5.068	0.4202	Atp6v1d
-0.3578	6.17	0.2763	Akt1
-0.3577	4.225	0.7043	P2ry10b
-0.3576	4.829	0.5103	Slc39a7
-0.3571	5.902	0.3566	Rpn1
-0.3571	5.58	0.3604	Lrif1
-0.3568	6.611	0.3948	Ybx1
-0.3567	8.545	0.3107	Cdh23
-0.3567	3.203	0.7634	Gm15283
-0.3565	5.952	0.3249	Ptbp1
-0.3564	3.679	0.6809	Mtrr
-0.356	7.602	0.2417	Fscn1
-0.356	4.269	0.5979	Junos
-0.3559	5.471	0.3462	Cnot8
-0.3558	11.21	0.1148	Cx3cr1
-0.3557	5.084	0.4228	Slc2a1
-0.3556	5.862	0.3441	Hspa12a
-0.3555	3.644	0.6415	Ino80c
-0.3551	3.422	0.6974	Sumf2
-0.3546	3.934	0.629	Gm33699
-0.3542	4.548	0.6097	Nol7
-0.3541	6.884	0.2554	Vapa
-0.3535	3.949	0.5961	Prdx2
-0.3532	3.768	0.6142	Snap47
-0.3531	5.35	0.3671	Vps18
-0.353	7.724	0.243	Ptpro
-0.3528	3.768	0.8772	Ccdc80
-0.3527	5.354	0.5285	Irak1
-0.3527	4.618	0.5326	Lbr
-0.3524	3.428	0.673	Spice1
-0.3521	7.982	0.1701	Arpc2
-0.3519	5.844	0.4658	Ssr3
-0.3517	6.92	0.2022	Hcls1
-0.3515	5.926	0.4216	Hnrnpf
-0.3513	4.909	0.5037	Ssbp4
-0.3512	4.982	0.4644	Vps11
-0.3511	6.954	0.2245	Sat1
-0.3504	3.345	0.685	Zfp212
-0.3501	4.646	0.5202	Glmp
-0.3499	5.801	0.2869	Rab35
-0.3496	5.45	0.3441	Ppp6c
-0.3494	4.453	0.5202	Gpkow
-0.3494	4.095	0.5688	Lysmd3
-0.3492	4.364	0.6541	Atp6v0c
-0.3491	4.868	0.5381	Marchf2
-0.349	5.723	0.3671	Nras
-0.3483	7.149	0.1755	Anp32a
-0.3483	5.704	0.373	Erf
-0.3482	6.842	0.1924	Tram1
-0.348	3.364	0.7218	Cfap418
-0.3479	6.046	0.3468	Afap1l1
-0.3477	6.156	0.285	Gnai3
-0.3477	5.375	0.416	Zfp24
-0.3475	5.516	0.517	Rpl23a
-0.3474	6.242	0.35	Mat2a
-0.3473	7.25	0.2323	Bach1
-0.3472	3.552	0.6601	Ebp
-0.3471	6.013	0.4658	Ccng2
-0.3468	7.651	0.2728	Gspt1
-0.3464	6.91	0.3194	Arpc1b
-0.3457	4.539	0.586	Nt5m
-0.3456	5.427	0.3881	Fundc1
-0.3452	5.604	0.3503	Plekhf2
-0.3449	5.068	0.4439	Gm46367
-0.3447	4.9	0.488	Mnt
-0.3447	2.816	0.8243	Ermap
-0.3443	7.041	0.3249	Parvg
-0.3435	6.085	0.3359	Mast3
-0.3435	5.19	0.4086	Slamf6
-0.3431	3.239	0.6818	Ptpmt1
-0.343	4.192	0.5967	Slc35d1
-0.3429	6.096	0.4141	Calu
-0.3426	6.588	0.2717	1700017B05Rik
-0.3426	6.357	0.4991	Nt5dc1
-0.3425	5.309	0.3705	Dynll2
-0.342	3.895	0.6813	Mis12
-0.3417	6.275	0.4613	Vmp1
-0.3415	4.74	0.5541	Midn
-0.3414	8.271	0.1261	Chst11
-0.341	5.193	0.501	Taldo1
-0.3407	6.243	0.3507	Abhd15
-0.3406	5.793	0.44	Tagap
-0.3402	4.926	0.5373	Gtpbp4
-0.3401	8.546	0.1704	Tln1
-0.3396	6.35	0.3216	Arf4
-0.3395	5.452	0.4269	Asb2
-0.3394	5.015	0.4513	Tnpo2
-0.3391	3.246	0.6898	Uros
-0.339	4.703	0.5862	Ift52
-0.339	3.888	0.6111	Tmem11
-0.3388	4.616	0.5786	Dlg4
-0.3386	4.817	0.5025	Prkaca
-0.3385	6.119	0.3152	Usp22
-0.3374	6.855	0.3247	Serbp1
-0.3374	4.609	0.5558	Tlr1
-0.3371	3.349	0.6908	Zswim9
-0.3361	6.627	0.3159	Rassf5
-0.3354	5.302	0.3956	Limk1
-0.3354	5.225	0.4742	Pnrc2
-0.3353	3.776	0.6387	Acadvl
-0.3348	5.576	0.5285	Gvin-ps7
-0.3344	5.984	0.368	Cndp2
-0.3344	5.057	0.5961	Pdha1
-0.3343	3.81	0.6324	Zcchc9
-0.3332	8.538	0.09944	Lcp1
-0.3332	4.841	0.49	Vhl
-0.3331	8.532	0.1333	Pros1
-0.3331	3.58	0.6418	Tmem106c
-0.333	4.871	0.6296	Mpv17l
-0.3326	6.344	0.474	Eif4b
-0.3326	3.788	0.646	Exosc5
-0.332	8.036	0.1598	Adgre1
-0.3318	11.24	0.06467	Maml3
-0.3318	6.06	0.3955	Mfsd1
-0.3317	3.468	0.6877	Antkmt
-0.3314	6.603	0.3043	Nova1
-0.3314	3.912	0.642	Ppm1m
-0.3312	5.48	0.4039	Pptc7
-0.3311	5.354	0.5612	Prim2
-0.3301	5.138	0.4478	Fam20b
-0.3301	4.595	0.5006	Fcgrt
-0.3299	5.473	0.3862	St6galnac4
-0.3297	3.93	0.6415	Phax
-0.3296	6.428	0.2968	Zbtb18
-0.3294	4.844	0.4896	Arpc1a
-0.3292	3.571	0.724	Dus1l
-0.329	6.051	0.3268	Mtpn
-0.3288	7.893	0.1479	Tm9sf3
-0.3286	4.383	0.5631	Sp2
-0.3285	5.859	0.3463	Tmem234
-0.3284	5.05	0.4658	Wars1
-0.3281	4.387	0.6108	Mpdu1
-0.328	8.71	0.1542	Capza2
-0.3278	6.348	0.4367	Ghitm
-0.3274	4.716	0.5089	Rpe
-0.327	4.879	0.4731	Zfp143
-0.3267	9.309	0.1238	Cyfip1
-0.3266	3.612	0.6806	Pigs
-0.3251	7.34	0.3533	Calm1
-0.325	5.714	0.3541	Sec61a1
-0.3247	4.092	0.577	Scamp3
-0.3243	6.355	0.2863	Arpc5
-0.3243	4.869	0.5272	Nuak2
-0.324	5.54	0.493	Dnaja1
-0.3238	6.225	0.3055	Myl12b
-0.3237	8.534	0.163	Adam10
-0.3235	5.354	0.8723	Mobp
-0.3232	7.329	0.2323	Hmgb1
-0.323	5.973	0.3447	Rhog
-0.3227	4.065	0.674	Mcm3
-0.3227	3.871	0.6784	Srp14
-0.3225	3.509	0.6813	Tmem71
-0.3222	5.196	0.4613	Slc35c2
-0.3221	4.009	0.5876	9330159M07Rik
-0.3218	4.351	0.5471	Got2
-0.3217	3.521	0.7005	R74862
-0.3216	7.141	0.3844	Kpna1
-0.3216	5.427	0.4714	Slc39a10
-0.3215	5.177	0.4269	Psme3ip1
-0.3213	4.735	0.5037	Vps26b
-0.3211	5.723	0.4201	Ppp2r5a
-0.3209	6.165	0.3776	Ppp3r1
-0.3209	3.431	0.6856	Sys1
-0.3205	5.754	0.3621	Dctn1
-0.3204	7.118	0.194	Tmed7
-0.3202	4.858	0.5535	Tstd2
-0.3201	5.07	0.5781	Snap29
-0.3196	3.616	0.7146	Grk4
-0.3195	3.636	0.6757	Cox17
-0.3189	4.369	0.6111	Gmfg
-0.3188	5.839	0.4172	Dcp1b
-0.3187	4.629	0.6343	Il1rap
-0.3186	3.954	0.6201	Fance
-0.3183	4.832	0.5129	Dnajb1
-0.3182	7.311	0.2996	Mlec
-0.3181	3.491	0.7566	Gpd1
-0.3179	4.561	0.5979	Atxn1l
-0.3179	4.258	0.608	Ppp1r11
-0.3178	5.194	0.5786	Calm3
-0.3176	4.395	0.5902	Kmt5a
-0.3174	3.368	0.6895	Snrpd1
-0.3173	3.492	0.6532	Nrm
-0.3168	3.356	0.7309	Asl
-0.3165	4.569	0.5678	Atpif1
-0.3163	4.16	0.6532	Gm15850
-0.3162	6.701	0.2549	Impact
-0.3161	8.919	0.2402	Myh9
-0.3161	6.37	0.2736	Psmd14
-0.316	5.3	0.4338	Diablo
-0.3159	4.586	0.6389	Gm19689
-0.3157	3.56	0.6932	Gm43464
-0.3156	4.635	0.5771	Ccdc127
-0.3155	5.221	0.5202	Gnl2
-0.3152	5.256	0.5153	Tcof1
-0.3149	7.112	0.3838	Cd68
-0.3146	4.365	0.6571	Nfkbib
-0.3145	4.889	0.6101	Zfp758
-0.3144	9.272	0.1487	Kctd12
-0.3144	3.753	0.7134	Fbxl9
-0.3143	6.711	0.3047	Gal3st4
-0.3143	3.313	0.7697	Sdhd
-0.3141	8.753	0.189	Msn
-0.3141	5.711	0.4152	Ccdc12
-0.314	8.544	0.244	Pvt1
-0.3138	3.468	0.6796	Eif2b5
-0.3137	5.119	0.4816	Plcb4
-0.3134	7.225	0.2225	Rab1a
-0.3133	5.51	0.4789	Gm44503
-0.3132	8.201	0.1609	Slc29a3
-0.3132	6.181	0.4662	Flna
-0.3131	4.877	0.4803	Mdh2
-0.3131	5.443	0.5294	Pgd
-0.3129	3.907	0.6864	Ube2o
-0.3127	5.91	0.354	Clec5a
-0.3124	4.882	0.521	Vbp1
-0.3121	3.768	0.642	Mgme1
-0.3118	10.06	0.2445	Apbb1ip
-0.3116	5.476	0.4406	Erlin2
-0.3115	6.823	0.2361	G3bp2
-0.3115	5.522	0.4356	Mta2
-0.3114	6.315	0.457	Hnrnpab
-0.3113	5.397	0.6611	1700025G04Rik
-0.3112	4.856	0.4677	Tbkbp1
-0.311	3.931	0.7013	Smc2
-0.3108	5.315	0.4817	Plekhb2
-0.3106	7.332	0.3397	Sncaip
-0.3104	7.126	0.3711	Clta
-0.3104	5.461	0.428	Atxn7l3b
-0.3103	7.683	0.298	Rhoh
-0.3103	6.837	0.3851	Atxn10
-0.3101	4.322	0.6097	Bscl2
-0.3099	7.165	0.2501	Csnk1e
-0.3097	4.843	0.488	Ythdf1
-0.3095	8.53	0.1598	Ptgs1
-0.3088	6.578	0.3495	Sh2b3
-0.3087	3.928	0.6111	Sumo2
-0.3086	5.047	0.5676	Lactb
-0.3086	3.562	0.7806	H2bc4
-0.3085	6.721	0.3694	Il17ra
-0.3085	4.555	0.5378	Tmem214
-0.3082	5.659	0.4275	Zmpste24
-0.308	3.911	0.663	Tfip11
-0.3077	3.694	0.7229	Pgm3
-0.3076	3.443	0.7731	Nelfcd
-0.3069	4.891	0.5012	Bcl10
-0.3066	9.655	0.1867	Bmp2k
-0.3066	4.064	0.6417	Shkbp1
-0.3063	4.881	0.5498	Arpp19
-0.3061	4.403	0.5592	Tnfrsf14
-0.3058	4.614	0.5533	Bcl2l13
-0.3057	5.53	0.503	Arrdc3
-0.3057	4.763	0.5489	Ssr4
-0.3057	4.531	0.7864	Mafk
-0.3052	4.244	0.6139	Dusp27
-0.3052	4.517	0.7162	Usp5
-0.3051	6.259	0.3862	Etf1
-0.3049	4.726	0.6101	Eif1a
-0.3047	6.493	0.3564	Heca
-0.3045	4.862	0.5558	Golga5
-0.3044	4.174	0.6146	Emc10
-0.3043	5.582	0.3881	Lclat1
-0.3042	5.088	0.517	Sbds
-0.3039	4.899	0.5624	Naglu
-0.3038	7.487	0.3314	Ucp2
-0.3037	5.498	0.4351	5330438D12Rik
-0.3035	6.58	0.277	Ralb
-0.303	5.246	0.474	4931406C07Rik
-0.3028	4.176	0.7333	Neurl4
-0.3025	6.712	0.4378	Gm2a
-0.3025	2.958	0.8051	Zfas1
-0.3022	7.577	0.3297	Tspan7
-0.3022	4.543	0.7139	Sema4b
-0.302	4.721	0.6396	Zfyve28
-0.3016	3.352	0.7465	Mrpl15
-0.3014	4.927	0.5837	Uchl5
-0.3012	4.923	0.5781	Pcyt1a
-0.3011	4.429	0.6188	Cdk4
-0.3005	5.151	0.5349	Snw1
-0.3003	3.628	0.6989	Pold4
-0.3002	4.822	0.6142	Rnf6
-0.2999	7.031	0.2835	Prkar1a
-0.2999	4.18	0.7766	Hhat
-0.2998	5.733	0.397	Mafg
-0.2986	5.16	0.5523	Sae1
-0.2979	6.49	0.3149	Tmem50a
-0.2979	6.79	0.368	Kdm2b
-0.2978	5.073	0.4993	Clcc1
-0.2973	8.368	0.182	Fus
-0.2972	5.242	0.6163	Ms4a6d
-0.2968	5.853	0.4132	Necap2
-0.2968	3.458	0.7048	Tpgs2
-0.2963	7.464	0.2728	Pla2g15
-0.2963	6.505	0.3026	Rab27a
-0.2962	6.985	0.3268	Os9
-0.2962	5.949	0.4498	Asap3
-0.296	5.143	0.4666	Raver1
-0.296	4.336	0.6162	6430548M08Rik
-0.296	3.139	0.7699	ENSMUSG00000120693
-0.2959	5.216	0.4819	Lrp10
-0.2959	4.35	0.6194	Irgm1
-0.2959	4.599	0.6276	Usp46
-0.2959	5.459	0.7709	Tnfaip3
-0.2953	9.036	0.2003	Retreg1
-0.2953	6.731	0.3314	Septin2 - ENSMUSG00000026276
-0.2953	4.085	0.619	Ccdc59
-0.2952	5.972	0.4377	Rab5c
-0.2951	4.153	0.6389	Isca1
-0.295	4.801	0.7005	Siglece
-0.2949	5.359	0.4888	Nus1
-0.2948	8.066	0.2142	Ptp4a2
-0.2944	5.263	0.5791	Cse1l
-0.2944	4.174	0.6313	Ppp1r8
-0.2941	4.079	0.6243	Fam219b
-0.2939	3.553	0.7683	Ptpn21
-0.2938	11.22	0.2514	Tmcc3
-0.2937	5.904	0.4346	Cops4
-0.2936	4.851	0.5222	Rrm2b
-0.2933	4.98	0.5287	Mgat2
-0.2931	5.246	0.5964	Rps18
-0.293	4.681	0.6286	Cbx4
-0.2929	8.037	0.2231	Nptn
-0.2929	5.416	0.5026	Sf3a1
-0.2929	3.799	0.7238	Nifk
-0.2928	4.748	0.8138	Nfkbid
-0.2924	4.525	0.5742	Arhgap9
-0.2923	6.07	0.42	Atg3
-0.2921	3.182	0.7795	Cyb5rl
-0.2916	3.672	0.7311	Armcx3
-0.2915	3.1	0.7788	Armc3
-0.2912	5.927	0.4261	Zbtb38
-0.2911	5.164	0.5571	Selenos
-0.2911	4.417	0.5582	Gpr108
-0.291	5.056	0.493	Ap1m1
-0.291	5.398	0.5165	Ctbp1
-0.2909	5.229	0.5829	Lrpap1
-0.2907	5.495	0.4905	Fuca1
-0.2907	4.741	0.6122	Mbd3
-0.2905	6.043	0.3443	Ctsf
-0.2903	6.191	0.436	Gclc
-0.2903	4.982	0.638	Cct3
-0.2902	5.097	0.5489	Manea
-0.29	6.894	0.3437	Klhl7
-0.2899	6.807	0.311	Arl4c
-0.2897	3.561	0.7731	Sh3glb2
-0.2896	7.065	0.3438	Arhgef40
-0.2894	6.442	0.3166	Cic
-0.2886	7.746	0.287	Usp8
-0.2885	8.253	0.1894	Lnpep
-0.2883	5.505	0.603	Gaa
-0.288	8.411	0.4086	Grn
-0.288	2.971	0.8082	Smim20
-0.2878	3.351	0.7288	Cry1
-0.2872	5.242	0.5066	Gtf2ird2
-0.287	5.762	0.4833	Sypl
-0.2869	6.533	0.373	Rlim
-0.2867	6.003	0.397	Gmeb1
-0.2864	7.919	0.241	Rap1a
-0.2864	6.336	0.354	Rad21
-0.2864	5.585	0.5117	Dusp3
-0.2864	4.375	0.6135	Eif3l
-0.2864	4.902	0.6877	Tmem144
-0.2862	5.955	0.4406	Shisa5
-0.2861	4.475	0.6897	Slc12a7
-0.286	3.525	0.7561	Dkc1
-0.2859	5.682	0.4475	Lman2
-0.2853	9.798	0.3003	Ly86
-0.2853	6.178	0.3827	Dek
-0.2853	4.014	0.9228	Cacnb4
-0.2852	5.688	0.457	Rab11b
-0.2852	4.883	0.5331	Rer1
-0.2852	4.091	0.6286	Ube2v1
-0.2847	6.833	0.2788	Tmem59
-0.2846	3.904	0.6777	Crls1
-0.2842	5.125	0.4599	Map3k11
-0.284	3.845	0.6785	Mtrfr
-0.2839	6.324	0.3234	Ankrd13a
-0.2838	5.29	0.537	Zfp869
-0.2837	7.333	0.3821	Fcer1g
-0.2836	6.042	0.3958	Mtch1
-0.2836	5.079	0.5232	Dnajc24
-0.2834	9.304	0.6786	Mir6236
-0.2833	5.398	0.5354	Stxbp4
-0.2832	6.06	0.517	Tdrd3
-0.283	5.155	0.5655	Rps13
-0.283	4.451	0.646	Sugp1
-0.283	3.964	0.6719	Gnptg
-0.283	3.696	0.6897	Slc30a1
-0.2828	6.309	0.3876	Sqstm1
-0.2828	7.039	0.4113	Irf5
-0.2826	5.452	0.6336	Gm3739
-0.2825	5.101	0.474	Aldh3a2
-0.2819	3.819	0.7069	Prkd2
-0.2817	3.326	0.7583	Ehhadh
-0.2813	7.64	0.2556	Rab3il1
-0.2813	5.413	0.499	Khsrp
-0.2812	7.898	0.3291	Slc16a6
-0.281	5.456	0.5326	Zfp658
-0.281	3.653	0.7004	Jtb
-0.2808	4.057	0.6287	Tchp
-0.2807	7.768	0.2709	Scamp2
-0.2807	5.271	0.5037	Tmco1
-0.2807	4.882	0.6094	Sfr1
-0.2807	4.347	0.6099	Ints13
-0.2806	5.696	0.4424	H3f3a
-0.2806	4.649	0.6142	Gsk3a
-0.2805	5.075	0.5732	Pdap1
-0.2801	6.028	0.3881	Trp53
-0.2799	6.018	0.4007	Calcrl
-0.2799	3.726	0.7586	Nup85
-0.2798	8.942	0.2442	Cttnbp2nl
-0.2794	4.145	0.8423	Syt11
-0.2791	4.751	0.5875	Psma2
-0.2788	5.664	0.4515	Tsg101
-0.2788	4.816	0.5397	Tspan4
-0.2788	4.813	0.5397	Snapin
-0.2788	4.782	0.6148	Ublcp1
-0.2785	3.124	0.7982	Fam171a1
-0.2781	4.435	0.604	Zkscan17
-0.278	6.249	0.3946	Snx12
-0.2778	5.316	0.5624	Nbeal2
-0.2772	4.58	0.6325	4930444A19Rik
-0.2768	6.572	0.3671	Cep68
-0.2767	8.093	0.2975	St3gal5
-0.2765	5.514	0.4903	Eif2s2
-0.2762	3.823	0.7125	Zbtb33
-0.2757	4.179	0.6263	Ddx47
-0.2755	4.057	0.6897	Msh6
-0.2753	8.269	0.2709	Anxa3
-0.2753	7.246	0.3711	Rgl1
-0.2751	7.589	0.2947	Gnb1
-0.2748	5.675	0.4817	Tmpo
-0.2748	4.251	0.6597	Cog7
-0.2748	3.378	0.8199	Qtrt2
-0.2743	6.69	0.3812	Tgoln1
-0.2743	6.006	0.5664	Icam1
-0.2743	3.879	0.7338	Cdipt
-0.2742	3.608	0.7095	Lancl1
-0.2738	7.04	0.8273	Mbp
-0.2735	10.11	0.2004	Laptm5
-0.2733	4.746	0.6016	Rab32
-0.2732	3.178	0.7929	Emc4
-0.273	6.49	0.3897	Strada
-0.2729	4.558	0.618	Smarcd2
-0.2729	3.34	0.8199	Pgk1
-0.2726	6.852	0.3946	Ddx39b
-0.2721	4.281	0.663	Fam98b
-0.272	4.597	0.5781	Man2c1
-0.2718	5.005	0.589	Bmi1
-0.2718	3.964	0.6809	Zbtb2
-0.2718	3.605	0.7146	ENSMUSG00000120863
-0.2717	3.71	0.7993	Ccdc77
-0.2716	3.756	0.7164	ENSMUSG00000120204
-0.2716	3.499	0.7709	Flot2
-0.2715	7.844	0.243	Rac1
-0.2713	7.804	0.3891	Mtss1
-0.2712	3.057	0.7992	Cdc34
-0.2709	4.013	0.7741	Slc48a1
-0.2707	5.718	0.5427	Zbtb1
-0.2707	6.373	0.7005	Tbpl1
-0.2706	8.888	0.1928	Cltc
-0.2706	5.1	0.5533	Uspl1
-0.2705	5.571	0.5177	Acsl1
-0.2704	5.737	0.6879	Bcl2a1b
-0.2703	5.913	0.4112	Anapc5
-0.2701	5.044	0.5408	Ier3ip1
-0.2698	4.897	0.6482	Rps21
-0.2696	7.412	0.3629	Itgb2
-0.2696	4.612	0.6145	Uchl3
-0.2696	3.736	0.7292	Rrp7a
-0.2695	6.696	0.4265	Gm35188
-0.2695	4.129	0.6541	Srfbp1
-0.2693	4.659	0.638	Gm37233
-0.2693	3.714	0.7832	Bach2os
-0.2691	5.474	0.5408	Cdc42se1
-0.269	6.696	0.3957	Tmem30a
-0.2688	7.091	0.3621	Tor1aip1
-0.2688	5.682	0.4751	Napa
-0.2688	4.612	0.6651	Rpl10a
-0.2688	3.535	0.7741	D8Ertd738e
-0.2685	4.393	0.6543	Gm46224
-0.2684	4.533	0.6053	Dtnb
-0.2683	5.007	0.5294	Man1b1
-0.2683	3.143	0.7943	Cdkn2aip
-0.2682	8.447	0.2106	Actr2
-0.2681	4.512	0.6233	Crnkl1
-0.268	6.751	0.3333	Prkd3
-0.2678	3.581	0.7514	Foxred1
-0.2676	7.425	0.331	Sdcbp
-0.2673	3.687	0.7064	Gpr35
-0.2671	7.03	0.3955	Cd300c2
-0.2671	3.992	0.7037	Pdcl
-0.2669	4.21	0.6889	Rbm10
-0.2667	3.366	0.7704	Ticam1
-0.2666	8.991	0.3553	Rasgrp3
-0.2661	3.285	0.777	Snhg6
-0.2659	7.926	0.3766	Ptpn1
-0.2656	8.211	0.2387	Rap1b
-0.2655	5.825	0.5607	Npm1
-0.2651	3.509	0.745	Zbtb14
-0.2648	8.621	0.3238	Man1a
-0.2647	3.584	0.7641	Rnf25
-0.2646	4.626	0.5978	Ncoa7
-0.2646	4.582	0.7405	Rps16
-0.2643	5.191	0.5322	Yars
-0.2642	4.268	0.6806	Tmem109
-0.2641	4.064	0.708	Gtf3c2
-0.264	7.989	0.2442	Ubl3
-0.2638	4.935	0.5624	Eloc
-0.2637	4.204	0.646	Dynlrb1
-0.2637	3.829	0.7248	Bud23
-0.2636	4.709	0.6415	Myh10
-0.2634	6.571	0.5664	Fyco1
-0.2633	5.81	0.4478	Bnip3l
-0.2633	3.97	0.6762	Tmem230
-0.2632	6.575	0.4322	Usp6nl
-0.2632	7.413	0.4367	Rffl
-0.2628	8.365	0.2912	Arhgap25
-0.2627	6.829	0.4173	Macroh2a1
-0.2626	6.391	0.4113	Usp2
-0.2625	3.708	0.7273	Gpn1
-0.2622	5.073	0.563	Ash2l
-0.2621	5.825	0.5294	Focad
-0.2621	3.46	0.8256	Extl2
-0.2618	4.923	0.6142	Ehmt2
-0.2618	3.577	0.7741	Rpl15
-0.2617	4.659	0.805	Cnp
-0.2615	5.642	0.7683	Wdr25
-0.2614	7.2	0.3555	Tnfrsf1b
-0.2611	7.237	0.3572	Gbf1
-0.2609	5.633	0.5244	Trir
-0.2607	4.012	0.7365	Esd
-0.2606	4.778	0.7723	Eef1b2
-0.2604	6.31	0.4437	Hadha
-0.2603	7.961	0.3183	Calm2
-0.26	7.641	0.3033	Hnrnpul1
-0.26	3.55	0.7604	Tfrc
-0.2598	4.165	0.6596	Rgl3
-0.2597	4.494	0.6597	Scyl1
-0.2593	8.034	0.3566	Ncf1
-0.2591	5.361	0.5157	Tlr2
-0.2589	6.609	0.5285	Atp1a1
-0.2588	4.845	0.6101	Nol10
-0.2585	5.333	0.6371	Nfkbia
-0.2585	4.462	0.6932	Irf1
-0.2582	5.549	0.4993	Abce1
-0.2581	5.828	0.5135	Snx1
-0.258	4.511	0.6514	Rnh1
-0.2579	8.019	0.3348	Itgav
-0.2579	5.431	0.5654	Pycard
-0.2576	4.944	0.6541	Psma1
-0.2571	5.165	0.5807	Slc31a1
-0.2567	3.39	0.7723	Hmga1
-0.2566	4.639	0.6094	Ctdsp1
-0.2562	4.329	0.7143	Slc39a13
-0.256	5.822	0.4912	Tcea1
-0.2559	4.377	0.6938	Ints14
-0.2558	5.019	0.5743	Tollip
-0.2557	5.882	0.4912	Nubpl
-0.2553	3.326	0.7985	Ipo4
-0.2551	5.727	0.603	Hspa9
-0.2551	3.452	0.8055	Snx7
-0.255	7.771	0.3007	Tnfrsf11a
-0.255	4.078	0.6989	Cnnm4
-0.2549	6.773	0.4658	Plcb2
-0.2549	4.352	0.646	Keap1
-0.2548	9.039	0.3043	Pik3ap1
-0.2547	7.709	0.337	Daglb
-0.2545	10.11	0.3161	Serinc3
-0.2545	4.411	0.6186	Rpf1
-0.2543	2.752	0.8791	Jcad
-0.2542	5.657	0.5276	Eng
-0.2541	4.419	0.7062	Elac1
-0.254	4.815	0.6611	Samm50
-0.2539	3.658	0.755	Vma21
-0.2538	7.606	0.2972	Stk10
-0.2535	5.251	0.5322	Ypel5
-0.2534	5.037	0.6354	Mboat7
-0.2533	4.916	0.5964	Sec23b
-0.2531	6.918	0.3908	Naip2
-0.253	3.1	0.7973	Abitram
-0.2529	4.121	0.7337	4833411C07Rik
-0.2528	3.168	0.7993	Ltv1
-0.2526	5.873	0.523	Atl3
-0.2525	4.345	0.642	Usp11
-0.2521	9.151	0.2318	Cux1
-0.2521	6.83	0.3722	Scamp1
-0.2521	4.425	0.7218	Ndufa12
-0.2516	6.673	0.5322	Adgrl2
-0.2516	4.23	0.6605	Atf7
-0.2515	6.848	0.3408	Prpf40a
-0.2514	6.087	0.424	Gcn1
-0.2514	4.201	0.7146	Cltb
-0.2514	3.254	0.8069	Sros1
-0.251	4.614	0.7089	Gm12610
-0.2508	4.622	0.6286	Niban2
-0.2507	7.904	0.277	Sema4d
-0.2505	6.1	0.4829	Trim8
-0.2505	5.266	0.603	Ppm1g
-0.2505	5.393	0.6165	Washc5
-0.2504	4.846	0.6938	Ube2q1
-0.2502	5.262	0.6746	Eipr1
-0.2501	5.185	0.6142	Nsrp1
-0.2498	8.057	0.3957	Hexa
-0.2496	4.814	0.6415	Lsm6
-0.2496	5.464	0.6486	Nhsl2
-0.2495	3.828	0.7644	ENSMUSG00000120309
-0.2493	4.036	0.7056	Gba2
-0.2493	3.442	0.805	Cnot11
-0.2492	4.786	0.6188	Irf9
-0.249	8.422	0.2755	Tspan14
-0.249	7.616	0.3036	Lrrfip1
-0.249	5.69	0.6239	Spg20
-0.2484	4.723	0.6416	Gm27017
-0.2484	5.36	0.6864	Gm44861
-0.2477	4.083	0.7501	Utp18
-0.2476	3.652	0.7309	Taf6
-0.2476	3.335	0.7817	Pofut2
-0.2475	4.383	0.663	Ube2j2
-0.247	7.982	0.3673	Pum2
-0.247	3.449	0.7784	Pdgfa
-0.2468	4.547	0.7309	4933421O10Rik
-0.2465	7.962	0.3276	Trem2
-0.246	4.62	0.7557	Gmpr
-0.2459	5.977	0.4993	Edem2
-0.2456	6.249	0.501	Hdac4
-0.2455	4.976	0.6111	Usp36
-0.2455	3.439	0.7723	Cables2
-0.2454	4.136	0.7604	Tet1
-0.2453	3.257	0.8042	Gvin1
-0.2449	5.52	0.6199	Tnfaip8l2
-0.2449	3.393	0.793	5730507A11Rik
-0.2447	6.055	0.4803	Smim14
-0.2445	8.587	0.289	Mtus1
-0.2445	6.295	0.4722	Smc1a
-0.2444	4.931	0.6591	Hsbp1
-0.2443	4.336	0.6903	Txndc9
-0.2442	9.63	0.3291	Arhgap5
-0.2438	7.164	0.4366	Ttyh3
-0.2437	9.077	0.7392	C1qc
-0.2435	6.162	0.4228	Ndufs4
-0.2433	4.21	0.7276	Sdad1
-0.2432	5.118	0.7057	Pes1
-0.2432	3.389	0.7699	Ikbip
-0.243	6.658	0.4275	Tbc1d9b
-0.2429	5.45	0.6759	Prr12
-0.2427	9.092	0.479	Jarid2
-0.2427	4.637	0.6759	Nop14
-0.2427	4.369	0.7295	Zfp994
-0.2426	5.693	0.5781	Abhd2
-0.2426	4.969	0.6914	Hsph1
-0.2425	3.471	0.8423	Capn2
-0.2424	7.245	0.4342	Tm6sf1
[truncated: 55,011 more rows]
