# Supplementary material for: P2RX7 regulates tauopathy progression via tau and mitochondria loading in extracellular vesicles
Source: Research Square preprint supplement (doi:10.21203/rs.3.rs-6771517/v1), 2025-06-23
Supplement: Supplementary file 6 [file 9ac00a264b625d9acaacf98c.xlsx]

## Sheet: Hipp.Bulk_PS19 vs WT
Hippocampus bulk-RNA-seq - DEA PS19 vs WT, related to Fig. 3b and Extended Data Fig. 2a
feature	symbol	gene_title	logFC	AveExprWT	AveExprPS19	meta.q
ENSMUSG00000030789	Itgax	integrin alpha X	3.215	1.42458	4.63964	6.469e-17
ENSMUSG00000037686	Aspg	asparaginase	2.013	2.78882	4.80152	2.215e-15
ENSMUSG00000018774	Cd68	CD68 antigen	1.704	3.92884	5.63246	1.72e-14
ENSMUSG00000073418	C4b	complement C4B (Chido blood group)	2.206	6.77064	8.97664	2.165e-14
ENSMUSG00000030579	Tyrobp	TYRO protein tyrosine kinase binding protein	1.826	4.03496	5.86074	4.088e-14
ENSMUSG00000020932	Gfap	glial fibrillary acidic protein	1.992	9.29024	11.2823	4.622e-14
ENSMUSG00000023992	Trem2	triggering receptor expressed on myeloid cells 2	1.828	4.22742	6.05527	4.622e-14
ENSMUSG00000027254	Map1a	microtubule-associated protein 1 A	-0.6242	11.0277	10.4036	2.322e-13
ENSMUSG00000031393	Mecp2	methyl CpG binding protein 2	-0.4974	7.41922	6.92181	2.322e-13
ENSMUSG00000058715	Fcer1g	Fc receptor, IgE, high affinity I, gamma polypepti...	1.492	3.4662	4.95848	3.519e-13
ENSMUSG00000079037	Prnp	prion protein	0.8112	10.1142	10.9254	3.95e-13
ENSMUSG00000026764	Kif5c	kinesin family member 5C	-0.5085	9.8086	9.30009	3.95e-13
ENSMUSG00000021091	Serpina3n	serine (or cysteine) peptidase inhibitor, clade A,...	2.182	5.94598	8.12791	6.965e-13
ENSMUSG00000036887	C1qa	complement component 1, q subcomponent, alpha poly...	2.114	5.95204	8.06559	6.965e-13
ENSMUSG00000030124	Lag3	lymphocyte-activation gene 3	2.091	3.61511	5.70595	6.965e-13
ENSMUSG00000017760	Ctsa	cathepsin A	0.7953	6.86524	7.66056	7.91e-13
ENSMUSG00000016256	Ctsz	cathepsin Z	1.587	5.54434	7.13128	8.286e-13
ENSMUSG00000030342	Cd9	CD9 antigen	1.438	5.59723	7.03478	1.165e-12
ENSMUSG00000029622	Arpc1b	actin related protein 2/3 complex, subunit 1B	1.221	4.18485	5.40567	1.165e-12
ENSMUSG00000022037	Clu	clusterin	0.8385	10.1211	10.9596	1.613e-12
ENSMUSG00000015222	Map2	microtubule-associated protein 2	-0.6464	10.3594	9.71295	1.674e-12
ENSMUSG00000031284	Pak3	p21 (RAC1) activated kinase 3	-0.5922	6.94216	6.34993	1.89e-12
ENSMUSG00000074657	Kif5a	kinesin family member 5A	-0.8242	11.4457	10.6215	2.908e-12
ENSMUSG00000001025	S100a6	S100 calcium binding protein A6 (calcyclin)	1.641	3.35639	4.9976	3.638e-12
ENSMUSG00000021423	Ly86	lymphocyte antigen 86	1.696	3.82881	5.52499	3.744e-12
ENSMUSG00000028859	Csf3r	colony stimulating factor 3 receptor	1.503	3.62685	5.12999	4.242e-12
ENSMUSG00000031765	Mt1	metallothionein 1	1.359	7.58617	8.94485	4.332e-12
ENSMUSG00000031762	Mt2	metallothionein 2	1.569	6.85932	8.42835	4.866e-12
ENSMUSG00000014599	Csf1	colony stimulating factor 1 (macrophage)	0.9336	5.36503	6.29866	4.866e-12
ENSMUSG00000007891	Ctsd	cathepsin D	1.299	8.76439	10.0635	6.873e-12
ENSMUSG00000041515	Irf8	interferon regulatory factor 8	1.431	3.20047	4.63126	9.052e-12
ENSMUSG00000025232	Hexa	hexosaminidase A	0.7717	5.82262	6.59431	9.517e-12
ENSMUSG00000055204	Ankrd17	ankyrin repeat domain 17	-0.502	7.38929	6.88733	9.804e-12
ENSMUSG00000059498	Fcgr3	Fc receptor, IgG, low affinity III	1.281	3.97056	5.25126	1.027e-11
ENSMUSG00000036905	C1qb	complement component 1, q subcomponent, beta polyp...	1.88	5.79868	7.6789	1.06e-11
ENSMUSG00000064246	Chi3l1	chitinase 3 like 1	1.631	3.99644	5.62739	1.06e-11
ENSMUSG00000058793	Cds2	CDP-diacylglycerol synthase 2	-0.3925	9.44195	9.04949	1.06e-11
ENSMUSG00000036896	C1qc	complement component 1, q subcomponent, C chain	1.865	5.7829	7.6479	1.08e-11
ENSMUSG00000059336	Slc14a1	solute carrier family 14 (urea transporter), membe...	1.036	4.75825	5.79414	1.167e-11
ENSMUSG00000002985	Apoe	apolipoprotein E	1.106	10.8222	11.9281	1.171e-11
ENSMUSG00000034708	Grn	granulin	1.077	6.23893	7.31638	1.216e-11
ENSMUSG00000029810	Tmem176b	transmembrane protein 176B	1.012	5.06623	6.0784	1.54e-11
ENSMUSG00000018293	Pfn1	profilin 1	0.604	6.97535	7.57933	1.776e-11
ENSMUSG00000060371	Caln1	calneuron 1	-1.009	5.61821	4.6091	1.882e-11
ENSMUSG00000067586	S1pr3	sphingosine-1-phosphate receptor 3	1.57	3.66725	5.23683	2.027e-11
ENSMUSG00000096188	Cmtm4	CKLF-like MARVEL transmembrane domain containing 4	-0.5547	7.26148	6.7068	2.062e-11
ENSMUSG00000026656	Fcgr2b	Fc receptor, IgG, low affinity IIb	1.609	2.75608	4.36536	2.091e-11
ENSMUSG00000007653	Gabrb2	gamma-aminobutyric acid type A receptor subunit be...	-1.078	6.51898	5.44112	2.594e-11
ENSMUSG00000038642	Ctss	cathepsin S	1.753	6.33703	8.09026	3.177e-11
ENSMUSG00000021477	Ctsl	cathepsin L	0.861	6.41577	7.27677	3.177e-11
ENSMUSG00000031561	Tenm3	teneurin transmembrane protein 3	-0.6777	6.8278	6.15013	4.354e-11
ENSMUSG00000035673	Sbno2	strawberry notch 2	0.884	4.75082	5.63484	4.798e-11
ENSMUSG00000038143	Stox2	storkhead box 2	-0.4882	7.19778	6.70958	5.893e-11
ENSMUSG00000036908	Unc93b1	unc-93 homolog B1, TLR signaling regulator	1.156	4.42115	5.57714	6.322e-11
ENSMUSG00000000682	Cd52	CD52 antigen	2.071	1.83874	3.90964	7.588e-11
ENSMUSG00000027447	Cst3	cystatin C	0.8523	9.89556	10.7479	8.081e-11
ENSMUSG00000062647	Rpl7a	ribosomal protein L7A	0.4958	7.50538	8.00121	8.223e-11
ENSMUSG00000074457	S100a16	S100 calcium binding protein A16	0.7069	5.69425	6.40112	8.339e-11
ENSMUSG00000068129	Cst7	cystatin F (leukocystatin)	2.706	1.11079	3.81681	8.528e-11
ENSMUSG00000021665	Hexb	hexosaminidase B	1.05	6.8605	7.91036	9.638e-11
ENSMUSG00000053931	Cnn3	calponin 3, acidic	0.9325	6.63917	7.57162	9.732e-11
ENSMUSG00000025326	Ube3a	ubiquitin protein ligase E3A	-0.9322	5.5132	4.58104	9.732e-11
ENSMUSG00000031292	Cdkl5	cyclin dependent kinase like 5	-1.64	5.16504	3.52544	1.086e-10
ENSMUSG00000009575	Cbx5	chromobox 5	-0.3749	7.93281	7.55791	1.118e-10
ENSMUSG00000037605	Adgrl3	adhesion G protein-coupled receptor L3	-0.6066	6.47613	5.86958	1.133e-10
ENSMUSG00000026728	Vim	vimentin	2.138	5.91858	8.05662	1.345e-10
ENSMUSG00000000290	Itgb2	integrin beta 2	1.353	3.20804	4.56108	1.502e-10
ENSMUSG00000021939	Ctsb	cathepsin B	0.7606	9.21208	9.9727	1.53e-10
ENSMUSG00000034342	Cbl	Casitas B-lineage lymphoma	-1.314	4.84951	3.53595	1.538e-10
ENSMUSG00000035566	Pcdh17	protocadherin 17	-0.8766	6.37724	5.50068	1.786e-10
ENSMUSG00000018042	Cyb5r3	cytochrome b5 reductase 3	0.51	6.41714	6.92714	1.873e-10
ENSMUSG00000036560	Lgi4	leucine-rich repeat LGI family, member 4	0.733	5.88201	6.61503	1.948e-10
ENSMUSG00000025351	Cd63	CD63 antigen	1.172	5.83558	7.0074	2.049e-10
ENSMUSG00000039262	Prrc2b	proline-rich coiled-coil 2B	-0.5084	9.54315	9.03471	2.229e-10
ENSMUSG00000055022	Cntn1	contactin 1	-0.4795	8.72686	8.24738	2.229e-10
ENSMUSG00000001794	Capns1	calpain, small subunit 1	0.5984	7.17672	7.77508	2.318e-10
ENSMUSG00000030451	Herc2	HECT and RLD domain containing E3 ubiquitin protei...	-0.4234	8.43354	8.01011	2.756e-10
ENSMUSG00000026701	Prdx6	peroxiredoxin 6	1.051	7.80755	8.85901	3.078e-10
ENSMUSG00000046805	Mpeg1	macrophage expressed gene 1	1.443	5.23641	6.67977	3.153e-10
ENSMUSG00000039704	Lmbrd2	LMBR1 domain containing 2	-1.17	5.00655	3.83694	3.207e-10
ENSMUSG00000022283	Pabpc1	poly(A) binding protein, cytoplasmic 1	0.3782	7.52395	7.90213	3.216e-10
ENSMUSG00000052572	Dlg2	discs large MAGUK scaffold protein 2	-0.8873	7.77407	6.88673	3.444e-10
ENSMUSG00000049470	Aff4	AF4/FMR2 family, member 4	-0.4719	7.96503	7.49309	3.474e-10
ENSMUSG00000063142	Kcnma1	potassium large conductance calcium-activated chan...	-1.019	6.37982	5.36063	3.548e-10
ENSMUSG00000044080	S100a1	S100 calcium binding protein A1	0.8385	5.5428	6.38135	3.548e-10
ENSMUSG00000061603	Akap6	A kinase anchor protein 6	-0.5796	7.78416	7.20457	3.548e-10
ENSMUSG00000032562	Gnai2	G protein subunit alpha i2	0.5779	7.75399	8.3319	3.548e-10
ENSMUSG00000032959	Pebp1	phosphatidylethanolamine binding protein 1	0.3482	7.79486	8.14308	3.93e-10
ENSMUSG00000063077	Kif1b	kinesin family member 1B	-0.392	9.92038	9.52842	4.653e-10
ENSMUSG00000004151	Etv1	ets variant 1	-0.687	6.24287	5.55584	4.802e-10
ENSMUSG00000031529	Tnks	tankyrase, TRF1-interacting ankyrin-related ADP-ri...	-0.7752	6.27782	5.50259	5.015e-10
ENSMUSG00000075318	Scn2a	sodium channel, voltage-gated, type II, alpha	-0.6963	8.24783	7.5515	5.131e-10
ENSMUSG00000040724	Kcna2	potassium voltage-gated channel, shaker-related su...	-1.279	5.08216	3.80348	5.138e-10
ENSMUSG00000040997	Abhd4	abhydrolase domain containing 4	0.7292	6.2264	6.95558	5.225e-10
ENSMUSG00000034593	Myo5a	myosin VA	-0.425	8.86568	8.44064	5.225e-10
ENSMUSG00000031760	Mt3	metallothionein 3	0.8204	7.85644	8.67688	5.248e-10
ENSMUSG00000079481	Nhsl2	NHS like 2	-0.6836	6.62173	5.93817	5.269e-10
ENSMUSG00000050708	Ftl1	ferritin light polypeptide 1	0.8863	7.61914	8.5054	5.361e-10
ENSMUSG00000050556	Kcnb1	potassium voltage gated channel, Shab-related subf...	-0.7798	5.77304	4.99328	5.603e-10
ENSMUSG00000005871	Apc	APC, WNT signaling pathway regulator	-0.5236	8.47325	7.9496	5.753e-10
ENSMUSG00000032359	Ctsh	cathepsin H	1.104	3.7847	4.88846	6.128e-10
ENSMUSG00000040481	Bptf	bromodomain PHD finger transcription factor	-0.4507	7.27198	6.82129	6.214e-10
ENSMUSG00000024164	C3	complement component 3	2.45	2.38355	4.83377	6.72e-10
ENSMUSG00000036570	Fxyd1	FXYD domain-containing ion transport regulator 1	1.525	5.49915	7.0242	6.72e-10
ENSMUSG00000027422	Rrbp1	ribosome binding protein 1	0.6971	6.22463	6.92174	6.72e-10
ENSMUSG00000053580	Tanc2	tetratricopeptide repeat, ankyrin repeat and coile...	-0.4186	7.59772	7.1791	6.928e-10
ENSMUSG00000041852	Tcf20	transcription factor 20	-0.5023	7.07723	6.57494	6.952e-10
ENSMUSG00000022564	Grina	glutamate receptor, ionotropic, N-methyl D-asparta...	0.3264	8.90885	9.23528	6.979e-10
ENSMUSG00000043940	Wdfy3	WD repeat and FYVE domain containing 3	-0.5098	7.93316	7.42336	7.591e-10
ENSMUSG00000057738	Sptan1	spectrin alpha, non-erythrocytic 1	-0.2732	10.3956	10.1225	7.619e-10
ENSMUSG00000028745	Capzb	capping actin protein of muscle Z-line subunit bet...	0.335	7.91621	8.25116	7.782e-10
ENSMUSG00000019852	Arfgef3	ARFGEF family member 3	-1.219	5.93851	4.71972	8.022e-10
ENSMUSG00000048814	Lonrf2	LON peptidase N-terminal domain and ring finger 2	-0.3968	7.66985	7.27306	8.022e-10
ENSMUSG00000036800	Fam135b	family with sequence similarity 135, member B	-1.171	4.63705	3.46599	8.141e-10
ENSMUSG00000035133	Arhgap5	Rho GTPase activating protein 5	-0.7385	6.5209	5.78243	8.384e-10
ENSMUSG00000063317	Usp31	ubiquitin specific peptidase 31	-0.5087	6.83118	6.32251	8.813e-10
ENSMUSG00000005886	Ncoa2	nuclear receptor coactivator 2	-0.5123	6.78656	6.27427	9.445e-10
ENSMUSG00000000197	Nalcn	sodium leak channel, non-selective	-0.5817	6.77738	6.19566	9.648e-10
ENSMUSG00000022016	Akap11	A kinase anchor protein 11	-0.5834	8.26078	7.6774	1.039e-09
ENSMUSG00000022146	Osmr	oncostatin M receptor	1.605	3.41705	5.02165	1.116e-09
ENSMUSG00000052727	Map1b	microtubule-associated protein 1B	-0.6	10.4636	9.86353	1.119e-09
ENSMUSG00000052160	Pld4	phospholipase D family member 4	1.124	3.70468	4.82841	1.159e-09
ENSMUSG00000024610	Cd74	CD74 antigen (invariant polypeptide of major histo...	3.675	3.38894	7.0636	1.296e-09
ENSMUSG00000022323	Rida	reactive intermediate imine deaminase A homolog	0.8727	5.2718	6.14454	1.297e-09
ENSMUSG00000024122	Pdpk1	3-phosphoinositide dependent protein kinase 1	-0.5424	7.13924	6.59687	1.382e-09
ENSMUSG00000014602	Kif1a	kinesin family member 1A	-0.3358	10.6164	10.2806	1.403e-09
ENSMUSG00000030432	Rpl28	ribosomal protein L28	0.6172	6.91338	7.5306	1.409e-09
ENSMUSG00000079484	Phyhd1	phytanoyl-CoA dioxygenase domain containing 1	0.9211	4.68554	5.6066	1.442e-09
ENSMUSG00000032393	Dpp8	dipeptidylpeptidase 8	-0.4295	7.69231	7.26277	1.58e-09
ENSMUSG00000038630	Zkscan16	zinc finger with KRAB and SCAN domains 16	-0.8832	5.37437	4.49117	1.73e-09
ENSMUSG00000058135	Gstm1	glutathione S-transferase, mu 1	0.6245	7.80104	8.42552	1.757e-09
ENSMUSG00000034636	Zyg11b	zyg-ll family member B, cell cycle regulator	-0.5538	7.93293	7.37912	1.827e-09
ENSMUSG00000031207	Msn	moesin	0.853	5.34506	6.19808	1.848e-09
ENSMUSG00000032046	Abhd12	abhydrolase domain containing 12	0.29	8.09745	8.3874	1.886e-09
ENSMUSG00000031010	Usp9x	ubiquitin specific peptidase 9, X chromosome	-0.8681	7.23998	6.37188	1.932e-09
ENSMUSG00000035247	Hectd1	HECT domain E3 ubiquitin protein ligase 1	-0.4721	7.3052	6.83306	2.174e-09
ENSMUSG00000069516	Lyz2	lysozyme 2	2.281	3.8827	6.16385	2.195e-09
ENSMUSG00000015149	Sirt2	sirtuin 2	0.5354	7.24538	7.78078	2.195e-09
ENSMUSG00000035778	Ggta1	glycoprotein galactosyltransferase alpha 1, 3	1.327	3.10848	4.43539	2.226e-09
ENSMUSG00000034297	Med13	mediator complex subunit 13	-0.5944	6.34539	5.75101	2.292e-09
ENSMUSG00000025092	Hspa12a	heat shock protein 12A	-0.4371	8.35107	7.91398	2.306e-09
ENSMUSG00000024298	Zfp871	zinc finger protein 871	-1.141	5.21115	4.07052	2.336e-09
ENSMUSG00000025410	Dctn2	dynactin 2	0.307	7.87798	8.18503	2.509e-09
ENSMUSG00000002332	Dhrs1	dehydrogenase/reductase 1	0.6668	5.84935	6.51611	2.696e-09
ENSMUSG00000034021	Pds5b	PDS5 cohesin associated factor B	-0.5564	7.02383	6.46748	2.787e-09
ENSMUSG00000040037	Negr1	neuronal growth regulator 1	-0.4552	7.18373	6.72851	2.861e-09
ENSMUSG00000020859	Spag9	sperm associated antigen 9	-0.3741	8.48393	8.10983	2.933e-09
ENSMUSG00000001750	Tcirg1	T cell, immune regulator 1, ATPase, H+ transportin...	0.9081	4.35354	5.26167	2.946e-09
ENSMUSG00000027624	Epb41l1	erythrocyte membrane protein band 4.1 like 1	-0.2323	9.33585	9.1036	3.034e-09
ENSMUSG00000027288	Zfp106	zinc finger protein 106	-0.3362	8.41194	8.0757	3.044e-09
ENSMUSG00000025813	Homer2	homer scaffolding protein 2	-0.6637	6.60701	5.94331	3.047e-09
ENSMUSG00000060802	B2m	beta-2 microglobulin	1.554	6.48565	8.03956	3.134e-09
ENSMUSG00000096764	Slc12a6	solute carrier family 12, member 6	-0.6496	6.09505	5.44543	3.396e-09
ENSMUSG00000016150	Tenm1	teneurin transmembrane protein 1	-0.8758	5.66802	4.79223	3.452e-09
ENSMUSG00000002602	Axl	AXL receptor tyrosine kinase	0.7084	6.05428	6.76265	3.452e-09
ENSMUSG00000003226	Ranbp2	RAN binding protein 2	-0.5405	7.22292	6.68247	3.452e-09
ENSMUSG00000025362	Rps26	ribosomal protein S26	0.5224	6.453	6.97537	3.593e-09
ENSMUSG00000006519	Cyba	cytochrome b-245, alpha polypeptide	1.337	3.02092	4.35765	3.641e-09
ENSMUSG00000022658	Tagln3	transgelin 3	0.546	7.52911	8.07512	3.78e-09
ENSMUSG00000005893	Nr2c2	nuclear receptor subfamily 2, group C, member 2	-0.4359	7.14014	6.70423	3.824e-09
ENSMUSG00000059003	Grin2a	glutamate receptor, ionotropic, NMDA2A (epsilon 1)	-1.526	5.10446	3.57796	3.987e-09
ENSMUSG00000023845	Lnpep	leucyl/cystinyl aminopeptidase	-1.372	4.72553	3.35321	4.124e-09
ENSMUSG00000042744	Hectd4	HECT domain E3 ubiquitin protein ligase 4	-0.3392	8.65888	8.31966	4.239e-09
ENSMUSG00000073557	Ppp1r12b	protein phosphatase 1, regulatory subunit 12B	-0.4327	7.30382	6.87109	4.262e-09
ENSMUSG00000036698	Ago2	argonaute RISC catalytic subunit 2	-0.5016	7.1595	6.65793	4.273e-09
ENSMUSG00000028581	Laptm5	lysosomal-associated protein transmembrane 5	1.048	5.74485	6.79273	4.319e-09
ENSMUSG00000022817	Itgb5	integrin beta 5	0.8573	5.91116	6.76841	4.378e-09
ENSMUSG00000054640	Slc8a1	solute carrier family 8 (sodium/calcium exchanger)...	-1.132	5.32877	4.19661	4.438e-09
ENSMUSG00000015599	Ttbk1	tau tubulin kinase 1	-0.5343	7.01954	6.48523	4.655e-09
ENSMUSG00000051951	Xkr4	X-linked Kx blood group related 4	-1.108	4.98469	3.87672	4.703e-09
ENSMUSG00000067336	Bmpr2	bone morphogenetic protein receptor type 2	-0.5351	7.41456	6.87942	4.705e-09
ENSMUSG00000048732	Klhl11	kelch-like 11	-1.141	4.67482	3.53396	4.756e-09
ENSMUSG00000043991	Pura	purine rich element binding protein A	-0.3925	7.8747	7.48216	4.817e-09
ENSMUSG00000028849	Map7d1	MAP7 domain containing 1	0.3565	8.24058	8.59706	4.817e-09
ENSMUSG00000073411	H2-D1	histocompatibility 2, D region locus 1	1.835	5.53972	7.37464	4.966e-09
ENSMUSG00000030844	Rgs10	regulator of G-protein signalling 10	0.8255	4.68845	5.51395	4.966e-09
ENSMUSG00000026177	Slc11a1	solute carrier family 11 (proton-coupled divalent ...	1.654	2.27804	3.93204	5.196e-09
ENSMUSG00000021448	Shc3	src homology 2 domain-containing transforming prot...	-1.153	4.54698	3.39376	5.215e-09
ENSMUSG00000028583	Pdpn	podoplanin	1.075	4.26569	5.34025	5.269e-09
ENSMUSG00000026385	Dbi	diazepam binding inhibitor	0.9407	6.81644	7.75709	5.361e-09
ENSMUSG00000053199	Arhgap20	Rho GTPase activating protein 20	-0.5748	6.39999	5.82522	5.41e-09
ENSMUSG00000025283	Sat1	spermidine/spermine N1-acetyl transferase 1	0.8956	5.34991	6.24547	5.677e-09
ENSMUSG00000032181	Scg3	secretogranin III	0.4861	8.28305	8.76912	5.816e-09
ENSMUSG00000029614	Rpl6	ribosomal protein L6	0.412	7.30153	7.71358	5.962e-09
ENSMUSG00000029580	Actb	actin, beta	0.3131	10.3346	10.6478	6.003e-09
ENSMUSG00000056342	Usp34	ubiquitin specific peptidase 34	-0.4415	7.50917	7.06766	6.167e-09
ENSMUSG00000055567	Unc80	unc-80, NALCN activator	-0.5337	8.49865	7.96493	6.442e-09
ENSMUSG00000021027	Ralgapa1	Ral GTPase activating protein, alpha subunit 1	-0.4356	7.44083	7.00524	6.442e-09
ENSMUSG00000052336	Cx3cr1	C-X3-C motif chemokine receptor 1	0.8522	5.93299	6.78524	6.52e-09
ENSMUSG00000034926	Dhcr24	24-dehydrocholesterol reductase	-0.5872	6.5791	5.99192	6.53e-09
ENSMUSG00000090100	Ttbk2	tau tubulin kinase 2	-0.5339	6.63576	6.10187	6.707e-09
ENSMUSG00000038807	Rap1gap2	RAP1 GTPase activating protein 2	-0.5357	7.6874	7.15172	6.93e-09
ENSMUSG00000040855	Reps2	RALBP1 associated Eps domain containing protein 2	-0.5246	7.72466	7.20005	7.556e-09
ENSMUSG00000020120	Plek	pleckstrin	0.9218	4.25349	5.17524	7.632e-09
ENSMUSG00000030341	Tnfrsf1a	tumor necrosis factor receptor superfamily, member...	1.009	3.8683	4.87752	7.652e-09
ENSMUSG00000029723	Tsc22d4	Tsc22 domain family, member 4	0.8003	6.47083	7.27111	8.247e-09
ENSMUSG00000021190	Lgmn	legumain	0.731	6.85186	7.58287	8.247e-09
ENSMUSG00000017291	Taok1	TAO kinase 1	-0.4972	7.3654	6.86818	8.247e-09
ENSMUSG00000042390	Gatad2b	GATA zinc finger domain containing 2B	-0.9792	5.10105	4.12182	8.45e-09
ENSMUSG00000018008	Cyth4	cytohesin 4	0.8552	4.49032	5.34555	8.643e-09
ENSMUSG00000026667	Uhmk1	U2AF homology motif (UHM) kinase 1	-0.4599	8.32715	7.86729	9.164e-09
ENSMUSG00000103585	Pcdhgb4	protocadherin gamma subfamily B, 4	0.257	9.07372	9.33074	9.984e-09
ENSMUSG00000040415	Dtx3	deltex 3, E3 ubiquitin ligase	0.3342	7.84935	8.18354	1.02e-08
ENSMUSG00000020181	Nav3	neuron navigator 3	-0.696	6.1336	5.43755	1.037e-08
ENSMUSG00000046449	Nexmif	neurite extension and migration factor	-0.8444	5.70603	4.86168	1.067e-08
ENSMUSG00000025986	Slc39a10	solute carrier family 39 (zinc transporter), membe...	-0.5271	6.99521	6.46809	1.086e-08
ENSMUSG00000031827	Cotl1	coactosin like F-actin binding protein 1	0.7028	6.48833	7.19113	1.109e-08
ENSMUSG00000053141	Ptprt	protein tyrosine phosphatase receptor type T	-0.4236	7.15876	6.73516	1.153e-08
ENSMUSG00000059326	Csf2ra	colony stimulating factor 2 receptor, alpha, low-a...	0.687	5.13917	5.82614	1.168e-08
ENSMUSG00000041570	Camsap2	calmodulin regulated spectrin-associated protein f...	-0.4921	7.7099	7.21782	1.171e-08
ENSMUSG00000032878	Ccdc85a	coiled-coil domain containing 85A	-0.632	6.36887	5.73682	1.177e-08
ENSMUSG00000056201	Cfl1	cofilin 1, non-muscle	0.429	9.46882	9.89782	1.185e-08
ENSMUSG00000028053	Ash1l	ASH1 like histone lysine methyltransferase	-0.4726	7.62456	7.15194	1.202e-08
ENSMUSG00000027799	Nbea	neurobeachin	-0.647	8.4828	7.8358	1.212e-08
ENSMUSG00000008668	Rps18	ribosomal protein S18	0.5279	6.59858	7.12644	1.224e-08
ENSMUSG00000040896	Kcnd3	potassium voltage-gated channel, Shal-related fami...	-0.4787	6.93605	6.4574	1.224e-08
ENSMUSG00000021244	Ylpm1	YLP motif containing 1	-0.4329	7.27281	6.83989	1.25e-08
ENSMUSG00000049775	Tmsb4x	thymosin, beta 4, X chromosome	0.4731	9.30757	9.78064	1.252e-08
ENSMUSG00000000804	Usp32	ubiquitin specific peptidase 32	-0.414	7.23793	6.82389	1.262e-08
ENSMUSG00000052698	Tln2	talin 2	-0.4326	7.30983	6.87725	1.264e-08
ENSMUSG00000067288	Rps28	ribosomal protein S28	0.5937	6.03293	6.62667	1.294e-08
ENSMUSG00000025508	Rplp2	ribosomal protein lateral stalk subunit P2	0.5128	6.51377	7.02656	1.303e-08
ENSMUSG00000024548	Setbp1	SET binding protein 1	-0.7263	5.64862	4.92236	1.316e-08
ENSMUSG00000025132	Arhgdia	Rho GDP dissociation inhibitor alpha	0.2825	8.20107	8.48362	1.377e-08
ENSMUSG00000069601	Ank3	ankyrin 3, epithelial	-0.3617	8.94041	8.57875	1.378e-08
ENSMUSG00000032244	Fem1b	fem 1 homolog b	-0.3901	7.38107	6.99094	1.391e-08
ENSMUSG00000022463	Srebf2	sterol regulatory element binding factor 2	-0.3658	7.9634	7.59764	1.392e-08
ENSMUSG00000052889	Prkcb	protein kinase C, beta	-0.5364	8.52308	7.98673	1.396e-08
ENSMUSG00000038174	Hycc2	hyccin PI4KA lipid kinase complex subunit 2	-0.5516	6.48593	5.93436	1.42e-08
ENSMUSG00000022201	Zfr	zinc finger RNA binding protein	-0.3154	8.23304	7.91762	1.42e-08
ENSMUSG00000103144	Pcdhga1	protocadherin gamma subfamily A, 1	0.2532	9.09176	9.345	1.42e-08
ENSMUSG00000005087	Cd44	CD44 antigen	1.253	3.1362	4.38946	1.442e-08
ENSMUSG00000026904	Slc4a10	solute carrier family 4, sodium bicarbonate cotran...	-0.5603	7.87952	7.31926	1.453e-08
ENSMUSG00000024294	Mib1	MIB E3 ubiquitin protein ligase 1	-0.4662	7.48235	7.01617	1.461e-08
ENSMUSG00000029405	G3bp2	G3BP stress granule assembly factor 2	-0.3339	8.20895	7.87506	1.519e-08
ENSMUSG00000103749	Pcdhgb5	protocadherin gamma subfamily B, 5	0.2562	9.07795	9.33416	1.528e-08
ENSMUSG00000104063	Pcdhgb7	protocadherin gamma subfamily B, 7	0.2662	9.09643	9.36267	1.539e-08
ENSMUSG00000071415	Rpl23	ribosomal protein L23	0.6365	7.09815	7.73465	1.551e-08
ENSMUSG00000034731	Dgkh	diacylglycerol kinase, eta	-1.306	4.70775	3.40132	1.627e-08
ENSMUSG00000034341	Wbp2	WW domain binding protein 2	0.2703	8.66792	8.93825	1.647e-08
ENSMUSG00000026879	Gsn	gelsolin	0.9244	6.17197	7.09637	1.68e-08
ENSMUSG00000047888	Tnrc6b	trinucleotide repeat containing 6b	-0.4474	6.98671	6.53926	1.754e-08
ENSMUSG00000006333	Rps9	ribosomal protein S9	0.5859	7.42986	8.01579	1.766e-08
ENSMUSG00000018501	Ncor1	nuclear receptor co-repressor 1	-0.422	8.09967	7.67771	1.777e-08
ENSMUSG00000003316	Glg1	golgi apparatus protein 1	-0.417	8.09798	7.68103	1.9e-08
ENSMUSG00000034868	Myl12b	myosin, light chain 12B, regulatory	0.336	7.83444	8.17045	1.926e-08
ENSMUSG00000048388	Fam171b	family with sequence similarity 171, member B	-0.4506	8.57104	8.12047	1.932e-08
ENSMUSG00000067274	Rplp0	ribosomal protein lateral stalk subunit P0	0.4737	7.33661	7.81029	2.031e-08
ENSMUSG00000040118	Cacna2d1	calcium channel, voltage-dependent, alpha2/delta s...	-0.5889	7.52293	6.93399	2.038e-08
ENSMUSG00000031320	Rps4x	ribosomal protein S4, X-linked	0.4937	7.47174	7.9654	2.042e-08
ENSMUSG00000093930	Hmgcs1	3-hydroxy-3-methylglutaryl-Coenzyme A synthase 1	-0.5511	7.73313	7.18201	2.062e-08
ENSMUSG00000102748	Pcdhgb2	protocadherin gamma subfamily B, 2	0.2524	9.0903	9.3427	2.145e-08
ENSMUSG00000028246	Faxc	failed axon connections homolog	-0.7559	5.51056	4.75466	2.189e-08
ENSMUSG00000039419	Cntnap2	contactin associated protein-like 2	-0.6101	6.55236	5.94223	2.228e-08
ENSMUSG00000102440	Pcdhga9	protocadherin gamma subfamily A, 9	0.2601	9.09846	9.3586	2.29e-08
ENSMUSG00000060126	Tpt1	tumor protein, translationally-controlled 1	0.6091	7.94241	8.55155	2.366e-08
ENSMUSG00000023067	Cdkn1a	cyclin dependent kinase inhibitor 1A	1.186	3.23854	4.42484	2.402e-08
ENSMUSG00000028691	Prdx1	peroxiredoxin 1	0.5095	6.65258	7.16206	2.486e-08
ENSMUSG00000026426	Arl8a	ADP-ribosylation factor-like 8A	0.3621	7.65867	8.02078	2.568e-08
ENSMUSG00000073421	H2-Ab1	histocompatibility 2, class II antigen A, beta 1	2.608	2.0823	4.69016	2.57e-08
ENSMUSG00000039477	Tnrc18	trinucleotide repeat containing 18	-0.6379	5.956	5.31815	2.598e-08
ENSMUSG00000049176	Frmpd4	FERM and PDZ domain containing 4	-0.5796	6.65372	6.07415	2.618e-08
ENSMUSG00000057716	Tmem178b	transmembrane protein 178B	-0.4441	7.37279	6.92866	2.66e-08
ENSMUSG00000044986	Tst	thiosulfate sulfurtransferase, mitochondrial	0.7508	4.81048	5.56123	2.707e-08
ENSMUSG00000023036	Pcdhgc4	protocadherin gamma subfamily C, 4	0.2538	9.11752	9.37136	2.796e-08
ENSMUSG00000103088	Pcdhgb6	protocadherin gamma subfamily B, 6	0.2676	9.12929	9.39691	2.867e-08
ENSMUSG00000022829	Stxbp5l	syntaxin binding protein 5-like	-1.048	5.60957	4.562	2.907e-08
ENSMUSG00000061032	Rrp1	ribosomal RNA processing 1	0.262	8.28748	8.54945	2.995e-08
ENSMUSG00000038900	Rpl12	ribosomal protein L12	0.5008	6.82385	7.32467	3.081e-08
ENSMUSG00000029713	Gnb2	guanine nucleotide binding protein (G protein), be...	0.3475	7.85195	8.19941	3.209e-08
ENSMUSG00000017404	Rpl19	ribosomal protein L19	0.5276	7.41564	7.94327	3.22e-08
ENSMUSG00000018474	Chd3	chromodomain helicase DNA binding protein 3	-0.3921	9.84875	9.45664	3.243e-08
ENSMUSG00000018927	Ccl6	C-C motif chemokine ligand 6	1.695	1.98488	3.67985	3.261e-08
ENSMUSG00000021508	Cxcl14	C-X-C motif chemokine ligand 14	0.5144	6.56315	7.07759	3.322e-08
ENSMUSG00000037706	Cd81	CD81 antigen	0.606	8.27981	8.88584	3.327e-08
ENSMUSG00000046785	Epm2aip1	EPM2A interacting protein 1	-0.4275	7.26049	6.83302	3.358e-08
ENSMUSG00000091228	Gm20390	predicted gene 20390	0.3919	6.9402	7.33212	3.374e-08
ENSMUSG00000022762	Ncam2	neural cell adhesion molecule 2	-0.7748	5.43884	4.66406	3.396e-08
ENSMUSG00000009927	Rps25	ribosomal protein S25	0.5236	6.93133	7.45495	3.396e-08
ENSMUSG00000030122	Ptms	parathymosin	0.4117	8.83617	9.24789	3.802e-08
ENSMUSG00000102222	Pcdhga10	protocadherin gamma subfamily A, 10	0.2508	9.10137	9.35218	3.802e-08
ENSMUSG00000014956	Ppp1cb	protein phosphatase 1 catalytic subunit beta	-0.3441	7.83607	7.49196	3.844e-08
ENSMUSG00000023367	Tmem176a	transmembrane protein 176A	0.9733	3.87859	4.85186	3.869e-08
ENSMUSG00000039100	Marchf6	membrane associated ring-CH-type finger 6	-0.386	8.133	7.74696	3.96e-08
ENSMUSG00000003429	Rps11	ribosomal protein S11	0.5934	7.08404	7.67748	4.021e-08
ENSMUSG00000040904	Gm21988	predicted gene 21988	0.3935	6.90843	7.30192	4.134e-08
ENSMUSG00000030465	Psd3	pleckstrin and Sec7 domain containing 3	-0.6699	9.2255	8.55561	4.158e-08
ENSMUSG00000103037	Pcdhgb1	protocadherin gamma subfamily B, 1	0.2489	9.12321	9.37209	4.186e-08
ENSMUSG00000037563	Rps16	ribosomal protein S16	0.5105	6.65724	7.16779	4.268e-08
ENSMUSG00000041670	Rims1	regulating synaptic membrane exocytosis 1	-0.4226	7.66555	7.24291	4.319e-08
ENSMUSG00000019179	Mdh2	malate dehydrogenase 2, NAD (mitochondrial)	0.2762	8.1276	8.40376	4.346e-08
ENSMUSG00000040785	Ttc3	tetratricopeptide repeat domain 3	-0.3446	9.97209	9.62745	4.393e-08
ENSMUSG00000025647	Shisa5	shisa family member 5	0.5669	5.74214	6.30902	4.649e-08
ENSMUSG00000025262	Fam120c	family with sequence similarity 120, member C	-0.6645	5.79179	5.12729	4.788e-08
ENSMUSG00000037646	Vps13b	vacuolar protein sorting 13B	-0.5308	6.41001	5.87921	4.789e-08
ENSMUSG00000094483	Purb	purine rich element binding protein B	-0.285	8.93019	8.6452	4.791e-08
ENSMUSG00000020300	Cpeb4	cytoplasmic polyadenylation element binding protei...	-0.5638	6.92212	6.35833	5e-08
ENSMUSG00000028176	Lrrc7	leucine rich repeat containing 7	-0.7432	6.09984	5.35669	5.073e-08
ENSMUSG00000039652	Cpeb3	cytoplasmic polyadenylation element binding protei...	-0.5985	6.04341	5.44488	5.141e-08
ENSMUSG00000020647	Ncoa1	nuclear receptor coactivator 1	-0.375	7.56789	7.19284	5.545e-08
ENSMUSG00000035078	Mtmr9	myotubularin related protein 9	-0.6609	5.82085	5.15994	5.644e-08
ENSMUSG00000002489	Tiam1	T cell lymphoma invasion and metastasis 1	-0.4159	7.26732	6.85138	5.792e-08
ENSMUSG00000103677	Pcdhga4	protocadherin gamma subfamily A, 4	0.255	9.11905	9.37404	5.792e-08
ENSMUSG00000030102	Itpr1	inositol 1,4,5-trisphosphate receptor 1	-0.7149	8.95375	8.2389	5.817e-08
ENSMUSG00000036550	Cnot1	CCR4-NOT transcription complex, subunit 1	-0.4204	7.06578	6.64535	5.826e-08
ENSMUSG00000036333	Kidins220	kinase D-interacting substrate 220	-0.2463	8.62284	8.37655	5.991e-08
ENSMUSG00000035805	Mlc1	megalencephalic leukoencephalopathy with subcortic...	0.6349	7.54446	8.17941	6.119e-08
ENSMUSG00000103332	Pcdhga2	protocadherin gamma subfamily A, 2	0.2568	9.14632	9.4031	6.119e-08
ENSMUSG00000011884	Gltp	glycolipid transfer protein	0.6615	5.39621	6.0577	6.166e-08
ENSMUSG00000019505	Ubb	ubiquitin B	0.3758	8.75648	9.13228	6.248e-08
ENSMUSG00000020591	Ntsr2	neurotensin receptor 2	0.677	6.86534	7.54235	6.291e-08
ENSMUSG00000041354	Rgl2	ral guanine nucleotide dissociation stimulator-lik...	0.5033	6.05897	6.56228	6.388e-08
ENSMUSG00000038274	Fau	FAU ubiquitin like and ribosomal protein S30 fusio...	0.5551	6.59869	7.15376	6.801e-08
ENSMUSG00000022108	Itm2b	integral membrane protein 2B	0.3619	9.3215	9.6834	7.553e-08
ENSMUSG00000028964	Park7	Parkinson disease (autosomal recessive, early onse...	0.4043	6.74365	7.14792	7.567e-08
ENSMUSG00000045128	Rpl18a	ribosomal protein L18A	0.5305	7.1198	7.65034	7.632e-08
ENSMUSG00000061983	Rps12	ribosomal protein S12	0.5959	6.53603	7.13197	7.636e-08
ENSMUSG00000025492	Ifitm3	interferon induced transmembrane protein 3	1.463	3.6037	5.06625	7.769e-08
ENSMUSG00000061911	Myt1l	myelin transcription factor 1-like	-0.4266	7.96407	7.53746	7.955e-08
ENSMUSG00000004266	Ptpn6	protein tyrosine phosphatase, non-receptor type 6	1.263	2.90432	4.1669	8.217e-08
ENSMUSG00000103567	Pcdhga5	protocadherin gamma subfamily A, 5	0.2417	9.10938	9.35106	8.277e-08
ENSMUSG00000102428	Pcdhga12	protocadherin gamma subfamily A, 12	0.2624	9.15113	9.41353	8.306e-08
ENSMUSG00000034957	Cebpa	CCAAT/enhancer binding protein alpha	0.8582	4.19896	5.05716	8.444e-08
ENSMUSG00000057841	Rpl32	ribosomal protein L32	0.5294	6.90073	7.43018	8.47e-08
ENSMUSG00000030657	Xylt1	xylosyltransferase 1	-1.129	4.27465	3.14549	8.559e-08
ENSMUSG00000037685	Atp8a1	ATPase phospholipid transporting 8A1	-0.341	8.03859	7.69761	8.568e-08
ENSMUSG00000059291	Rpl11	ribosomal protein L11	0.5477	6.87058	7.41824	8.592e-08
ENSMUSG00000104346	Pcdhga3	protocadherin gamma subfamily A, 3	0.2598	9.14687	9.40667	8.761e-08
ENSMUSG00000025794	Rpl14	ribosomal protein L14	0.4564	6.94777	7.40415	8.792e-08
ENSMUSG00000061315	Naca	nascent polypeptide-associated complex alpha polyp...	0.4238	7.01025	7.43408	8.833e-08
ENSMUSG00000103472	Pcdhga7	protocadherin gamma subfamily A, 7	0.2565	9.12971	9.38622	9.023e-08
ENSMUSG00000036594	H2-Aa	histocompatibility 2, class II antigen A, alpha	2.786	2.30431	5.0904	9.148e-08
ENSMUSG00000068699	Flnc	filamin C, gamma	1.326	2.74082	4.06644	9.553e-08
ENSMUSG00000019194	Scn1b	sodium channel, voltage-gated, type I, beta	0.3669	8.63418	9.00109	9.752e-08
ENSMUSG00000063297	Luzp2	leucine zipper protein 2	-0.7201	5.55815	4.838	9.806e-08
ENSMUSG00000020372	Rack1	receptor for activated C kinase 1	0.3813	7.28288	7.66416	9.91e-08
ENSMUSG00000028639	Ybx1	Y box protein 1	0.3608	7.15833	7.51912	9.929e-08
ENSMUSG00000049252	Lrp1b	low density lipoprotein-related protein 1B	-0.6369	5.98028	5.34333	1.002e-07
ENSMUSG00000049583	Grm5	glutamate receptor, metabotropic 5	-0.6111	7.82451	7.21344	1.019e-07
ENSMUSG00000015837	Sqstm1	sequestosome 1	0.3308	8.74406	9.07488	1.019e-07
ENSMUSG00000068284	Usf3	upstream transcription factor family member 3	-0.5084	6.49207	5.98369	1.028e-07
ENSMUSG00000030000	Add2	adducin 2	-0.9406	7.36726	6.42666	1.052e-07
ENSMUSG00000059070	Rpl18	ribosomal protein L18	0.4586	6.32903	6.78758	1.055e-07
ENSMUSG00000049517	Rps23	ribosomal protein S23	0.4825	6.9542	7.43665	1.069e-07
ENSMUSG00000030934	Oat	ornithine aminotransferase	0.4254	6.53721	6.96256	1.138e-07
ENSMUSG00000057863	Rpl36	ribosomal protein L36	0.5161	6.00094	6.51706	1.173e-07
ENSMUSG00000103793	Pcdhga6	protocadherin gamma subfamily A, 6	0.2589	9.12836	9.38722	1.212e-07
ENSMUSG00000012848	Rps5	ribosomal protein S5	0.4615	7.10843	7.56989	1.217e-07
ENSMUSG00000021242	Npc2	NPC intracellular cholesterol transporter 2	0.8285	6.04821	6.87676	1.22e-07
ENSMUSG00000042066	Tmcc2	transmembrane and coiled-coil domains 2	-0.2985	8.13865	7.84015	1.22e-07
ENSMUSG00000061787	Rps17	ribosomal protein S17	0.5218	6.54497	7.06673	1.258e-07
ENSMUSG00000067851	Arfgef1	ADP ribosylation factor guanine nucleotide exchang...	-0.4379	6.90197	6.46408	1.259e-07
ENSMUSG00000044533	Rps2	ribosomal protein S2	0.4267	7.30317	7.72983	1.263e-07
ENSMUSG00000043716	Rpl7	ribosomal protein L7	0.4444	7.48381	7.92824	1.291e-07
ENSMUSG00000042613	Pbxip1	pre B cell leukemia transcription factor interacti...	0.7	6.50339	7.20334	1.293e-07
ENSMUSG00000056851	Pcbp2	poly(rC) binding protein 2	0.3001	7.94082	8.24088	1.3e-07
ENSMUSG00000034723	Tmx4	thioredoxin-related transmembrane protein 4	-0.3297	7.93773	7.60798	1.313e-07
ENSMUSG00000046879	Irgm1	immunity-related GTPase family M member 1	1.075	3.71126	4.78676	1.314e-07
ENSMUSG00000059921	Unc5c	unc-5 netrin receptor C	-0.7114	5.8089	5.09748	1.314e-07
ENSMUSG00000060657	Marf1	meiosis regulator and mRNA stability 1	-0.3581	7.37439	7.01631	1.317e-07
ENSMUSG00000040560	Wdr7	WD repeat domain 7	-0.4714	7.82998	7.35856	1.319e-07
ENSMUSG00000061578	Ksr2	kinase suppressor of ras 2	-0.494	6.51987	6.02589	1.374e-07
ENSMUSG00000024127	Prepl	prolyl endopeptidase-like	-0.294	8.74836	8.45434	1.402e-07
ENSMUSG00000070565	Rasal2	RAS protein activator like 2	-0.4953	6.9731	6.47783	1.412e-07
ENSMUSG00000020598	Nrcam	neuronal cell adhesion molecule	-0.4072	8.72686	8.31969	1.439e-07
ENSMUSG00000024073	Birc6	baculoviral IAP repeat-containing 6	-0.419	7.40121	6.98222	1.44e-07
ENSMUSG00000024300	Myo1f	myosin IF	1.383	2.54672	3.92978	1.465e-07
ENSMUSG00000026384	Ptpn4	protein tyrosine phosphatase, non-receptor type 4	-0.7348	6.1069	5.37213	1.475e-07
ENSMUSG00000033880	Lgals3bp	lectin, galactoside-binding, soluble, 3 binding pr...	1.538	4.88735	6.42493	1.5e-07
ENSMUSG00000008682	Rpl10	ribosomal protein L10	0.4447	6.94304	7.38773	1.511e-07
ENSMUSG00000056553	Ptprn2	protein tyrosine phosphatase receptor type N polyp...	-0.5007	8.02647	7.52572	1.527e-07
ENSMUSG00000102742	Pcdhga11	protocadherin gamma subfamily A, 11	0.2546	9.16708	9.4217	1.547e-07
ENSMUSG00000024083	Pja2	praja ring finger ubiquitin ligase 2	-0.4008	9.28091	8.8801	1.563e-07
ENSMUSG00000016559	H3f3b	H3.3 histone B	0.3414	7.24515	7.58655	1.6e-07
ENSMUSG00000022812	Gsk3b	glycogen synthase kinase 3 beta	-0.337	7.68508	7.34809	1.604e-07
ENSMUSG00000018076	Med13l	mediator complex subunit 13-like	-0.4752	6.98825	6.51302	1.628e-07
ENSMUSG00000031229	Atrx	ATRX, chromatin remodeler	-0.4731	7.66458	7.19145	1.635e-07
ENSMUSG00000021670	Hmgcr	3-hydroxy-3-methylglutaryl-Coenzyme A reductase	-0.4713	6.68058	6.2093	1.65e-07
ENSMUSG00000056602	Fry	FRY microtubule binding protein	-0.4053	7.88712	7.48179	1.68e-07
ENSMUSG00000036298	Slc2a13	solute carrier family 2 (facilitated glucose trans...	-0.435	6.87021	6.43517	1.683e-07
ENSMUSG00000032328	Tmem30a	transmembrane protein 30A	-0.3399	8.15255	7.81262	1.685e-07
ENSMUSG00000042453	Reln	reelin	-0.6279	6.30938	5.68148	1.698e-07
ENSMUSG00000027499	Pkia	protein kinase inhibitor, alpha	-0.4085	7.01143	6.60296	1.699e-07
ENSMUSG00000061232	H2-K1	histocompatibility 2, K1, K region	1.517	5.21516	6.73204	1.73e-07
ENSMUSG00000037364	Srrt	serrate RNA effector molecule homolog (Arabidopsis...	0.3632	7.08341	7.44661	1.751e-07
ENSMUSG00000005506	Celf1	CUGBP, Elav-like family member 1	-0.3834	7.89313	7.5097	1.779e-07
ENSMUSG00000070639	Lrrc8b	leucine rich repeat containing 8 family, member B	-0.7603	5.37006	4.60971	1.804e-07
ENSMUSG00000037270	Bltp1	bridge-like lipid transfer protein family member 1	-0.3999	7.2958	6.89586	1.813e-07
ENSMUSG00000027712	Anxa5	annexin A5	0.8211	5.63419	6.4553	1.863e-07
ENSMUSG00000078812	Eif5a	eukaryotic translation initiation factor 5A	0.268	7.96391	8.23195	1.885e-07
ENSMUSG00000006024	Napa	N-ethylmaleimide sensitive fusion protein attachme...	0.2779	7.9148	8.1927	1.897e-07
ENSMUSG00000022416	Cacna1i	calcium channel, voltage-dependent, alpha 1I subun...	-0.518	6.60232	6.08434	1.942e-07
ENSMUSG00000056737	Capg	capping actin protein, gelsolin like	1.454	2.31186	3.76579	1.98e-07
ENSMUSG00000029468	P2rx7	purinergic receptor P2X, ligand-gated ion channel,...	0.3538	4.01527	4.36905	1.991e-07
ENSMUSG00000021998	Lcp1	lymphocyte cytosolic protein 1	0.9526	3.80844	4.76107	2.064e-07
ENSMUSG00000024472	Dcp2	decapping mRNA 2	-0.5304	6.24503	5.71466	2.064e-07
ENSMUSG00000040225	Prrc2c	proline-rich coiled-coil 2C	-0.3751	7.92543	7.55031	2.113e-07
ENSMUSG00000103897	Pcdhga8	protocadherin gamma subfamily A, 8	0.241	9.12975	9.37078	2.152e-07
ENSMUSG00000040940	Arhgef1	Rho guanine nucleotide exchange factor 1	0.4596	6.26473	6.72431	2.169e-07
ENSMUSG00000024608	Rps14	ribosomal protein S14	0.4659	7.1518	7.61771	2.193e-07
ENSMUSG00000024621	Csf1r	colony stimulating factor 1 receptor	0.7248	6.78399	7.50877	2.293e-07
ENSMUSG00000055421	Pcdh9	protocadherin 9	-0.4477	6.85253	6.40481	2.317e-07
ENSMUSG00000042625	Safb2	scaffold attachment factor B2	0.4099	6.95411	7.36406	2.414e-07
ENSMUSG00000055302	Mrfap1	Morf4 family associated protein 1	0.2835	7.83052	8.114	2.483e-07
ENSMUSG00000031604	Msmo1	methylsterol monoxygenase 1	-0.5337	6.25953	5.72582	2.527e-07
ENSMUSG00000019428	Fkbp8	FK506 binding protein 8	0.2473	8.29659	8.54388	2.553e-07
ENSMUSG00000049804	Armcx4	armadillo repeat containing, X-linked 4	-0.4771	6.57085	6.09376	2.56e-07
ENSMUSG00000040612	Ildr2	immunoglobulin-like domain containing receptor 2	-0.3515	7.4442	7.09265	2.605e-07
ENSMUSG00000020857	Nme2	NME/NM23 nucleoside diphosphate kinase 2	0.5184	5.80674	6.32509	2.618e-07
ENSMUSG00000015094	Npdc1	neural proliferation, differentiation and control ...	0.3015	7.88497	8.18648	2.651e-07
ENSMUSG00000041453	Rpl21	ribosomal protein L21	0.5324	7.72266	8.25509	2.657e-07
ENSMUSG00000035236	Scai	suppressor of cancer cell invasion	-0.5873	5.95209	5.36479	2.682e-07
ENSMUSG00000022488	Nckap1l	NCK associated protein 1 like	0.856	4.10494	4.96096	2.761e-07
ENSMUSG00000032666	1700025G04Rik	RIKEN cDNA 1700025G04 gene	-0.4186	6.9218	6.50316	2.761e-07
ENSMUSG00000020594	Pum2	pumilio RNA-binding family member 2	-0.3365	7.47887	7.1424	2.761e-07
ENSMUSG00000039585	Myo9a	myosin IXa	-0.3952	7.06361	6.66838	2.84e-07
ENSMUSG00000047459	Dynlrb1	dynein light chain roadblock-type 1	0.3856	6.86648	7.25209	2.855e-07
ENSMUSG00000074884	Serf2	small EDRK-rich factor 2	0.3965	6.89478	7.29123	2.877e-07
ENSMUSG00000024397	Aif1	allograft inflammatory factor 1	1.183	3.00184	4.18509	2.879e-07
ENSMUSG00000031095	Cul4b	cullin 4B	-0.7206	5.40637	4.68578	2.928e-07
ENSMUSG00000028843	Sh3bgrl3	SH3 domain binding glutamic acid-rich protein-like...	0.4852	6.63175	7.11697	3.041e-07
ENSMUSG00000045767	B230219D22Rik	RIKEN cDNA B230219D22 gene	-0.4445	6.71139	6.26685	3.05e-07
ENSMUSG00000019699	Akt3	thymoma viral proto-oncogene 3	-0.5265	7.66086	7.13439	3.081e-07
ENSMUSG00000059796	Eif4a1	eukaryotic translation initiation factor 4A1	0.2913	7.6153	7.90663	3.218e-07
ENSMUSG00000068373	D430041D05Rik	RIKEN cDNA D430041D05 gene	-0.4802	7.57391	7.0937	3.496e-07
ENSMUSG00000039682	Lap3	leucine aminopeptidase 3	0.5242	5.72512	6.24933	3.507e-07
ENSMUSG00000029238	Clock	clock circadian regulator	-0.5182	6.30543	5.78719	3.507e-07
ENSMUSG00000052146	Rps10	ribosomal protein S10	0.4375	6.46495	6.90247	3.558e-07
ENSMUSG00000026395	Ptprc	protein tyrosine phosphatase receptor type C	1.278	2.67121	3.94965	3.62e-07
ENSMUSG00000025967	Eef1b2	eukaryotic translation elongation factor 1 beta 2	0.4126	6.86991	7.28252	3.652e-07
ENSMUSG00000046364	Rpl27a	ribosomal protein L27A	0.4496	6.96517	7.41478	3.808e-07
ENSMUSG00000004319	Clcn3	chloride channel, voltage-sensitive 3	-0.3309	7.56377	7.23283	3.865e-07
ENSMUSG00000090841	Myl6	myosin, light polypeptide 6, alkali, smooth muscle...	0.456	7.63426	8.09027	3.886e-07
ENSMUSG00000058558	Rpl5	ribosomal protein L5	0.3328	7.31556	7.64838	3.989e-07
ENSMUSG00000021466	Ptch1	patched 1	-0.6159	5.87449	5.25861	4.102e-07
ENSMUSG00000015092	Edf1	endothelial differentiation-related factor 1	0.4321	6.36036	6.79242	4.182e-07
ENSMUSG00000025907	Rb1cc1	RB1-inducible coiled-coil 1	-0.4768	6.49828	6.0215	4.221e-07
ENSMUSG00000033960	Jcad	junctional cadherin 5 associated	-0.469	6.66243	6.19347	4.26e-07
ENSMUSG00000010095	Slc3a2	solute carrier family 3 (activators of dibasic and...	0.3602	6.92009	7.2803	4.42e-07
ENSMUSG00000023913	Pla2g7	phospholipase A2, group VII (platelet-activating f...	0.6293	7.3713	8.00063	4.539e-07
ENSMUSG00000044308	Ubr3	ubiquitin protein ligase E3 component n-recognin 3	-0.4007	7.62425	7.22351	4.539e-07
ENSMUSG00000020431	Adcy1	adenylate cyclase 1	-0.7474	10.0869	9.33952	4.552e-07
ENSMUSG00000024074	Crim1	cysteine rich transmembrane BMP regulator 1	-0.5785	6.88566	6.30713	4.56e-07
ENSMUSG00000055553	Kxd1	KxDL motif containing 1	0.4123	7.19003	7.60235	4.694e-07
ENSMUSG00000067212	H2-T23	histocompatibility 2, T region locus 23	1.053	3.34015	4.39359	4.756e-07
ENSMUSG00000060586	H2-Eb1	histocompatibility 2, class II antigen E beta	2.284	2.26746	4.5513	4.819e-07
ENSMUSG00000064267	Hvcn1	hydrogen voltage-gated channel 1	1.304	2.56579	3.86983	4.849e-07
ENSMUSG00000001289	Pfdn5	prefoldin 5	0.4355	6.8871	7.32259	4.922e-07
ENSMUSG00000041245	Wnk3	WNK lysine deficient protein kinase 3	-0.6971	5.39215	4.69506	5.002e-07
ENSMUSG00000024835	Coro1b	coronin, actin binding protein 1B	0.4468	6.20559	6.65236	5.086e-07
ENSMUSG00000028195	Ccn1	cellular communication network factor 1	1.244	3.21915	4.46266	5.107e-07
ENSMUSG00000017978	Cadps2	Ca2+-dependent activator protein for secretion 2	-0.5795	6.62986	6.05033	5.107e-07
ENSMUSG00000026173	Plcd4	phospholipase C, delta 4	0.7315	4.59122	5.32275	5.333e-07
ENSMUSG00000071658	Gng3	guanine nucleotide binding protein (G protein), ga...	0.4758	7.58758	8.06338	5.382e-07
ENSMUSG00000021140	Pcnx1	pecanex 1	-0.5199	7.62503	7.10514	5.402e-07
ENSMUSG00000071655	Ubxn1	UBX domain protein 1	0.4746	6.04622	6.52079	5.49e-07
ENSMUSG00000029484	Anxa3	annexin A3	0.9659	3.69006	4.65593	5.501e-07
ENSMUSG00000029166	Mapre3	microtubule-associated protein, RP/EB family, memb...	0.2773	7.77429	8.05158	5.543e-07
ENSMUSG00000028528	Dnajc6	DnaJ heat shock protein family (Hsp40) member C6	-0.3794	8.35216	7.97277	5.554e-07
ENSMUSG00000023249	Parp3	poly (ADP-ribose) polymerase family, member 3	1.187	2.94325	4.1304	5.587e-07
ENSMUSG00000029231	Pdgfra	platelet derived growth factor receptor, alpha pol...	-0.5703	5.97412	5.40378	5.734e-07
ENSMUSG00000033004	Mycbp2	MYC binding protein 2, E3 ubiquitin protein ligase	-0.2998	8.84815	8.5484	5.893e-07
ENSMUSG00000005142	Man2b1	mannosidase 2, alpha B1	0.5917	5.99719	6.58885	5.972e-07
ENSMUSG00000062997	Rpl35	ribosomal protein L35	0.5094	6.10888	6.6183	5.972e-07
ENSMUSG00000068220	Lgals1	lectin, galactose binding, soluble 1	0.8241	4.18451	5.00861	6.136e-07
ENSMUSG00000033565	Rbfox2	RNA binding protein, fox-1 homolog (C. elegans) 2	-0.2708	8.17161	7.90077	6.136e-07
ENSMUSG00000020315	Sptbn1	spectrin beta, non-erythrocytic 1	-0.3019	10.1766	9.87467	6.252e-07
ENSMUSG00000051335	Gfod1	glucose-fructose oxidoreductase domain containing ...	-0.7155	7.17387	6.45837	6.261e-07
ENSMUSG00000060681	Slc9a6	solute carrier family 9 (sodium/hydrogen exchanger...	-0.414	6.8625	6.44848	6.289e-07
ENSMUSG00000071076	Jund	jun D proto-oncogene	0.5257	6.42602	6.95172	6.292e-07
ENSMUSG00000090137	Uba52	ubiquitin A-52 residue ribosomal protein fusion pr...	0.4034	6.9313	7.33467	6.292e-07
ENSMUSG00000098274	Rpl24	ribosomal protein L24	0.4693	6.53866	7.008	6.751e-07
ENSMUSG00000018567	Gabarap	gamma-aminobutyric acid receptor associated protei...	0.4133	7.06691	7.48025	6.751e-07
ENSMUSG00000026827	Gpd2	glycerol phosphate dehydrogenase 2, mitochondrial	-0.5227	7.473	6.95028	6.808e-07
ENSMUSG00000007872	Id3	inhibitor of DNA binding 3	0.7563	4.97338	5.72971	6.964e-07
ENSMUSG00000038894	Irs2	insulin receptor substrate 2	-0.7249	5.45303	4.72818	7.007e-07
ENSMUSG00000037905	Bri3bp	Bri3 binding protein	-0.3658	7.20972	6.84388	7.041e-07
ENSMUSG00000026494	Kif26b	kinesin family member 26B	-0.8049	5.02946	4.22459	7.129e-07
ENSMUSG00000032827	Ppp1r9a	protein phosphatase 1, regulatory subunit 9A	-0.494	8.17941	7.68537	7.299e-07
ENSMUSG00000060803	Gstp1	glutathione S-transferase, pi 1	0.443	6.19607	6.63911	7.415e-07
ENSMUSG00000013663	Pten	phosphatase and tensin homolog	-0.3884	7.05258	6.66417	7.415e-07
ENSMUSG00000056258	Kcnq3	potassium voltage-gated channel, subfamily Q, memb...	-0.4371	7.91816	7.48106	7.422e-07
ENSMUSG00000044647	Csrnp3	cysteine-serine-rich nuclear protein 3	-0.4644	6.49103	6.02659	7.491e-07
ENSMUSG00000000346	Dazap2	DAZ associated protein 2	0.3738	7.06088	7.43464	7.492e-07
ENSMUSG00000020745	Pafah1b1	platelet-activating factor acetylhydrolase, isofor...	-0.267	9.09347	8.82645	7.492e-07
ENSMUSG00000038884	Shfl	shiftless antiviral inhibitor of ribosomal framesh...	0.393	6.71047	7.10345	7.588e-07
ENSMUSG00000025321	Itgb8	integrin beta 8	-0.631	5.69172	5.06074	7.625e-07
ENSMUSG00000021097	Clmn	calmin	-0.4226	7.5766	7.15396	7.826e-07
ENSMUSG00000027894	Slc6a17	solute carrier family 6 (neurotransmitter transpor...	-0.2324	9.17695	8.94454	7.921e-07
ENSMUSG00000019726	Lyst	lysosomal trafficking regulator	-0.6947	6.53278	5.83808	8.035e-07
ENSMUSG00000026424	Gpr37l1	G protein-coupled receptor 37-like 1	0.503	7.73081	8.23377	8.079e-07
ENSMUSG00000054364	Rhob	ras homolog family member B	0.3225	8.13366	8.45619	8.087e-07
ENSMUSG00000062328	Rpl17	ribosomal protein L17	0.4821	7.14472	7.62685	8.383e-07
ENSMUSG00000063457	Rps15	ribosomal protein S15	0.4691	7.72336	8.19245	8.528e-07
ENSMUSG00000049044	Rapgef4	Rap guanine nucleotide exchange factor (GEF) 4	-0.4624	9.04347	8.58106	8.912e-07
ENSMUSG00000090996	Gm20458	predicted gene 20458	0.6793	6.40217	7.08146	9.359e-07
ENSMUSG00000036095	Dgkb	diacylglycerol kinase, beta	-0.8646	7.27198	6.40738	9.393e-07
ENSMUSG00000038664	Herc1	HECT and RLD domain containing E3 ubiquitin protei...	-0.3434	8.31241	7.96904	9.79e-07
ENSMUSG00000033685	Ucp2	uncoupling protein 2 (mitochondrial, proton carrie...	1.007	5.15047	6.15744	1.005e-06
ENSMUSG00000017009	Sdc4	syndecan 4	0.7168	6.48391	7.20072	1.005e-06
ENSMUSG00000031532	Saraf	store-operated calcium entry-associated regulatory...	0.2602	7.84703	8.10719	1.027e-06
ENSMUSG00000020657	Dnajc27	DnaJ heat shock protein family (Hsp40) member C27	-0.364	7.21324	6.8492	1.033e-06
ENSMUSG00000060924	Csmd1	CUB and Sushi multiple domains 1	-0.4855	6.48402	5.99853	1.044e-06
ENSMUSG00000035929	H2-Q4	histocompatibility 2, Q region locus 4	1.406	2.96155	4.36801	1.062e-06
ENSMUSG00000038065	Mturn	maturin, neural progenitor differentiation regulat...	-0.3347	7.82548	7.4908	1.068e-06
ENSMUSG00000039579	Grin3a	glutamate receptor ionotropic, NMDA3A	-0.623	5.76014	5.13716	1.069e-06
ENSMUSG00000040952	Rps19	ribosomal protein S19	0.4149	6.47837	6.89322	1.074e-06
ENSMUSG00000001089	Luzp1	leucine zipper protein 1	-0.4017	7.0039	6.60218	1.074e-06
ENSMUSG00000024914	Drap1	DR1 associated protein 1	0.3451	6.93799	7.28312	1.077e-06
ENSMUSG00000000594	Gm2a	GM2 ganglioside activator protein	0.4661	6.32302	6.78911	1.078e-06
ENSMUSG00000028268	Gbp3	guanylate binding protein 3	1.161	2.96389	4.12518	1.087e-06
ENSMUSG00000025203	Scd2	stearoyl-Coenzyme A desaturase 2	-0.3256	10.704	10.3784	1.088e-06
ENSMUSG00000003534	Ddr1	discoidin domain receptor family, member 1	0.5658	6.5583	7.12414	1.091e-06
ENSMUSG00000052516	Robo2	roundabout guidance receptor 2	-0.4647	6.67674	6.21208	1.098e-06
ENSMUSG00000028692	Akr1a1	aldo-keto reductase family 1, member A1	0.2576	7.94917	8.20674	1.123e-06
ENSMUSG00000021730	Hcn1	hyperpolarization activated cyclic nucleotide gate...	-0.7732	5.47574	4.7025	1.177e-06
ENSMUSG00000052459	Atp6v1a	ATPase, H+ transporting, lysosomal V1 subunit A	-0.4142	9.08185	8.66765	1.182e-06
ENSMUSG00000034981	Parm1	prostate androgen-regulated mucin-like protein 1	-0.517	6.65181	6.13485	1.191e-06
ENSMUSG00000058230	Arhgap35	Rho GTPase activating protein 35	-0.2739	8.0359	7.76201	1.221e-06
ENSMUSG00000038665	Dgki	diacylglycerol kinase, iota	-0.7823	4.98625	4.20392	1.244e-06
ENSMUSG00000028524	Sgip1	SH3-domain GRB2-like (endophilin) interacting prot...	-0.3364	7.53662	7.20021	1.244e-06
ENSMUSG00000029304	Spp1	secreted phosphoprotein 1	1.444	3.77319	5.21709	1.255e-06
ENSMUSG00000057182	Scn3a	sodium channel, voltage-gated, type III, alpha	-0.5716	5.84313	5.27152	1.259e-06
ENSMUSG00000056427	Slit3	slit guidance ligand 3	-0.8495	6.06645	5.2169	1.268e-06
ENSMUSG00000061080	Lsamp	limbic system-associated membrane protein	-0.2978	8.77784	8.48	1.272e-06
ENSMUSG00000040690	Col16a1	collagen, type XVI, alpha 1	0.895	4.75153	5.64651	1.279e-06
ENSMUSG00000031447	Lamp1	lysosomal-associated membrane protein 1	0.519	8.22912	8.74812	1.354e-06
ENSMUSG00000028495	Rps6	ribosomal protein S6	0.3974	6.58012	6.97748	1.367e-06
ENSMUSG00000020721	Helz	helicase with zinc finger domain	-0.5134	6.13092	5.61752	1.375e-06
ENSMUSG00000036745	Ttll7	tubulin tyrosine ligase-like family, member 7	-0.4138	7.88656	7.47274	1.396e-06
ENSMUSG00000002413	Braf	Braf transforming gene	-0.3366	7.43358	7.09698	1.412e-06
ENSMUSG00000031376	Atp2b3	ATPase, Ca++ transporting, plasma membrane 3	-0.7707	7.54738	6.77669	1.428e-06
ENSMUSG00000032186	Tmod2	tropomodulin 2	-0.313	9.19151	8.87847	1.433e-06
ENSMUSG00000055762	Eef1d	eukaryotic translation elongation factor 1 delta	0.4087	6.42238	6.83109	1.459e-06
ENSMUSG00000002625	Akap8l	A kinase anchor protein 8-like	0.3463	7.24805	7.59431	1.496e-06
ENSMUSG00000039270	Megf9	multiple EGF-like-domains 9	-0.3848	7.54118	7.15635	1.519e-06
ENSMUSG00000027312	Atrn	attractin	-0.3088	7.87802	7.56926	1.526e-06
ENSMUSG00000022811	Zfp148	zinc finger protein 148	-0.4288	6.66213	6.23335	1.527e-06
ENSMUSG00000000740	Rpl13	ribosomal protein L13	0.5223	6.88474	7.40704	1.54e-06
ENSMUSG00000093674	Rpl41	ribosomal protein L41	0.4712	7.40359	7.87477	1.553e-06
ENSMUSG00000037541	Shank2	SH3 and multiple ankyrin repeat domains 2	-0.4347	8.0893	7.65457	1.554e-06
ENSMUSG00000058546	Rpl23a	ribosomal protein L23A	0.4799	6.72463	7.20449	1.563e-06
ENSMUSG00000038056	Kmt2c	lysine (K)-specific methyltransferase 2C	-0.3858	6.98142	6.59563	1.568e-06
ENSMUSG00000034707	Gns	glucosamine (N-acetyl)-6-sulfatase	0.3548	6.94411	7.29887	1.609e-06
ENSMUSG00000090053	Pakap	paralemmin A kinase anchor protein	-1.032	4.21204	3.18042	1.623e-06
ENSMUSG00000004040	Stat3	signal transducer and activator of transcription 3	0.4804	5.85278	6.33316	1.628e-06
ENSMUSG00000021624	Cd180	CD180 antigen	1.331	2.48985	3.82062	1.675e-06
ENSMUSG00000003970	Rpl8	ribosomal protein L8	0.3933	7.78168	8.17501	1.685e-06
ENSMUSG00000028634	Hivep3	human immunodeficiency virus type I enhancer bindi...	-0.4392	6.55839	6.11918	1.691e-06
ENSMUSG00000021719	Rgs7bp	regulator of G-protein signalling 7 binding protei...	-0.4105	7.94258	7.53204	1.709e-06
ENSMUSG00000021660	Btf3	basic transcription factor 3	0.4476	6.05623	6.50388	1.757e-06
ENSMUSG00000029571	Tmem106b	transmembrane protein 106B	-0.3227	7.46926	7.14653	1.762e-06
ENSMUSG00000047547	Cltb	clathrin light chain B	0.3725	7.36077	7.73327	1.769e-06
ENSMUSG00000079477	Rab7	RAB7, member RAS oncogene family	0.2244	8.2761	8.50046	1.778e-06
ENSMUSG00000009079	Ewsr1	Ewing sarcoma breakpoint region 1	0.249	8.14337	8.39233	1.808e-06
ENSMUSG00000038485	Socs7	suppressor of cytokine signaling 7	-0.3669	7.18653	6.81961	1.828e-06
ENSMUSG00000064215	Ifi27	interferon, alpha-inducible protein 27	0.7065	5.27579	5.98229	1.853e-06
ENSMUSG00000042680	Garem1	GRB2 associated regulator of MAPK1 subtype 1	-0.7532	5.67625	4.92301	1.871e-06
ENSMUSG00000001467	Cyp51	cytochrome P450, family 51	-0.5606	5.92787	5.36722	1.905e-06
ENSMUSG00000038970	Lmtk2	lemur tyrosine kinase 2	-0.3638	7.24573	6.88189	1.906e-06
ENSMUSG00000047557	Lxn	latexin	0.5146	5.57945	6.09409	1.922e-06
ENSMUSG00000090733	Rps27	ribosomal protein S27	0.5303	6.57949	7.10982	1.945e-06
ENSMUSG00000032589	Bsn	bassoon	-0.5602	9.28896	8.72873	1.958e-06
ENSMUSG00000024393	Prrc2a	proline-rich coiled-coil 2A	-0.1959	9.2826	9.08666	1.975e-06
ENSMUSG00000032518	Rpsa	ribosomal protein SA	0.4728	8.28673	8.75951	1.995e-06
ENSMUSG00000063511	Snrnp70	small nuclear ribonucleoprotein 70 (U1)	0.268	7.9987	8.26667	2.06e-06
ENSMUSG00000015852	Fcrl2	Fc receptor like 2	0.8471	4.78115	5.62823	2.11e-06
ENSMUSG00000102918	Pcdhgc3	protocadherin gamma subfamily C, 3	0.2322	9.27044	9.50265	2.114e-06
ENSMUSG00000028851	Nudc	nudC nuclear distribution protein	0.3722	6.83268	7.20483	2.121e-06
ENSMUSG00000003072	Atp5f1d	ATP synthase F1 subunit delta	0.3739	7.26912	7.64305	2.132e-06
ENSMUSG00000075470	Alg10b	ALG10 alpha-1,2-glucosyltransferase	-0.8643	4.71115	3.84684	2.174e-06
ENSMUSG00000041268	Dmxl2	Dmx-like 2	-0.4666	8.16703	7.70039	2.194e-06
ENSMUSG00000028234	Rps20	ribosomal protein S20	0.4368	6.51248	6.94932	2.202e-06
ENSMUSG00000033208	S100b	S100 protein, beta polypeptide, neural	0.6794	6.89269	7.57214	2.224e-06
ENSMUSG00000048490	Nrip1	nuclear receptor interacting protein 1	-0.6149	5.64025	5.02539	2.232e-06
ENSMUSG00000022752	Tomm70a	translocase of outer mitochondrial membrane 70A	-0.3443	7.33254	6.98823	2.237e-06
ENSMUSG00000061436	Hipk2	homeodomain interacting protein kinase 2	-0.5752	6.34629	5.77106	2.238e-06
ENSMUSG00000032060	Cryab	crystallin, alpha B	0.9796	6.5142	7.49383	2.245e-06
ENSMUSG00000020340	Cyfip2	cytoplasmic FMR1 interacting protein 2	-0.2546	10.1987	9.94408	2.267e-06
ENSMUSG00000093989	Rnasek	ribonuclease, RNase K	0.3702	6.69455	7.0647	2.298e-06
ENSMUSG00000102543	Pcdhgc5	protocadherin gamma subfamily C, 5	0.2083	9.30411	9.51243	2.369e-06
ENSMUSG00000006740	Kif5b	kinesin family member 5B	-0.3437	8.0823	7.73865	2.405e-06
ENSMUSG00000015745	Plekho1	pleckstrin homology domain containing, family O me...	0.6465	4.8193	5.46582	2.438e-06
ENSMUSG00000035284	Vps13c	vacuolar protein sorting 13C	-0.6879	6.70762	6.01974	2.452e-06
ENSMUSG00000068739	Sars1	seryl-tRNA synthetase 1	0.3249	7.48678	7.81168	2.459e-06
ENSMUSG00000090862	Rps13	ribosomal protein S13	0.4097	6.28495	6.69462	2.466e-06
ENSMUSG00000026623	Lpgat1	lysophosphatidylglycerol acyltransferase 1	-0.2949	7.75043	7.45552	2.466e-06
ENSMUSG00000075590	Nrbp2	nuclear receptor binding protein 2	0.5393	7.39457	7.93386	2.471e-06
ENSMUSG00000026238	Ptma	prothymosin alpha	0.3857	7.55585	7.94157	2.509e-06
ENSMUSG00000049354	Dcaf7	DDB1 and CUL4 associated factor 7	-0.2612	8.12036	7.85921	2.593e-06
ENSMUSG00000040565	Btaf1	B-TFIID TATA-box binding protein associated factor...	-0.5176	6.02769	5.51009	2.659e-06
ENSMUSG00000041141	Pnma8a	PNMA family member 8A	-0.5878	6.38724	5.79944	2.729e-06
ENSMUSG00000030120	Mlf2	myeloid leukemia factor 2	0.25	8.67507	8.92509	2.747e-06
ENSMUSG00000032383	Ppib	peptidylprolyl isomerase B	0.3809	6.55554	6.93641	2.831e-06
ENSMUSG00000029816	Gpnmb	glycoprotein (transmembrane) nmb	1.226	3.38217	4.60855	2.873e-06
ENSMUSG00000047675	Rps8	ribosomal protein S8	0.4545	7.29054	7.74502	2.878e-06
ENSMUSG00000021702	Thbs4	thrombospondin 4	1.009	4.37175	5.38124	2.896e-06
ENSMUSG00000057322	Rpl38	ribosomal protein L38	0.49	5.93416	6.42415	2.924e-06
ENSMUSG00000022587	Ly6e	lymphocyte antigen 6 family member E	0.4628	7.49665	7.95948	2.924e-06
ENSMUSG00000029108	Pcdh7	protocadherin 7	-0.5241	6.14466	5.62052	2.928e-06
ENSMUSG00000008036	Ap2s1	adaptor-related protein complex 2, sigma 1 subunit	0.3647	6.69894	7.06363	2.944e-06
ENSMUSG00000021061	Sptb	spectrin beta, erythrocytic	-0.4976	8.36026	7.86265	2.949e-06
ENSMUSG00000045967	Gpr158	G protein-coupled receptor 158	-0.402	7.10841	6.70643	2.97e-06
ENSMUSG00000070532	Ccdc190	coiled-coil domain containing 190	0.7957	4.10546	4.90113	2.994e-06
ENSMUSG00000061028	Clasrp	CLK4-associating serine/arginine rich protein	0.4314	6.14242	6.57382	3.018e-06
ENSMUSG00000036427	Gpi1	glucose-6-phosphate isomerase 1	0.1921	9.42736	9.61942	3.103e-06
ENSMUSG00000022469	Rapgef3	Rap guanine nucleotide exchange factor (GEF) 3	0.6015	5.57309	6.17459	3.108e-06
ENSMUSG00000027189	Trim44	tripartite motif-containing 44	-0.2228	8.44395	8.22115	3.154e-06
ENSMUSG00000020538	Srebf1	sterol regulatory element binding transcription fa...	0.4705	6.26045	6.73092	3.173e-06
ENSMUSG00000021596	Mctp1	multiple C2 domains, transmembrane 1	-0.6137	5.75961	5.14593	3.231e-06
ENSMUSG00000037259	Dzank1	double zinc ribbon and ankyrin repeat domains 1	-0.4814	7.82302	7.3416	3.242e-06
ENSMUSG00000038084	Opa1	OPA1, mitochondrial dynamin like GTPase	-0.3131	7.48914	7.17602	3.254e-06
ENSMUSG00000041841	Rpl37	ribosomal protein L37	0.45	6.49544	6.94539	3.259e-06
ENSMUSG00000018411	Mapt	microtubule-associated protein tau	0.1982	9.24995	9.44812	3.287e-06
ENSMUSG00000025153	Fasn	fatty acid synthase	-0.2245	8.48616	8.26167	3.295e-06
ENSMUSG00000030111	A2m	alpha-2-macroglobulin	1.357	3.62438	4.9813	3.334e-06
ENSMUSG00000070695	Cntnap5a	contactin associated protein-like 5A	-0.7149	5.20541	4.4905	3.462e-06
ENSMUSG00000019907	Ppp1r12a	protein phosphatase 1, regulatory subunit 12A	-0.4816	6.25297	5.7714	3.505e-06
ENSMUSG00000025290	Rps24	ribosomal protein S24	0.5117	7.79277	8.30449	3.534e-06
ENSMUSG00000025931	Paqr8	progestin and adipoQ receptor family member VIII	-0.4033	7.50526	7.10196	3.555e-06
ENSMUSG00000035530	Eif1	eukaryotic translation initiation factor 1	0.3348	8.21451	8.54928	3.629e-06
ENSMUSG00000038039	Gcc2	GRIP and coiled-coil domain containing 2	-0.4517	6.38106	5.92936	3.65e-06
ENSMUSG00000055839	Elob	elongin B	0.42	6.24736	6.6674	3.672e-06
ENSMUSG00000064225	Paqr9	progestin and adipoQ receptor family member IX	-0.5379	6.39076	5.85285	3.678e-06
ENSMUSG00000026587	Astn1	astrotactin 1	-0.2733	8.35044	8.07718	3.705e-06
ENSMUSG00000058600	Rpl30	ribosomal protein L30	0.4201	6.84199	7.26209	3.722e-06
ENSMUSG00000036377	Cracd	capping protein inhibiting regulator of actin	-0.4849	6.74773	6.2628	3.79e-06
ENSMUSG00000030729	Pgm2l1	phosphoglucomutase 2-like 1	-0.5163	8.28595	7.76965	3.849e-06
ENSMUSG00000022216	Psme1	proteasome (prosome, macropain) activator subunit ...	0.5559	5.23417	5.79008	3.86e-06
ENSMUSG00000027475	Kif3b	kinesin family member 3B	-0.4386	6.56666	6.12804	3.892e-06
ENSMUSG00000021700	Rab3c	RAB3C, member RAS oncogene family	-0.5019	8.92614	8.42422	3.903e-06
ENSMUSG00000027177	Hipk3	homeodomain interacting protein kinase 3	-0.4617	6.31551	5.85378	3.995e-06
ENSMUSG00000024381	Bin1	bridging integrator 1	0.2347	8.21047	8.44515	4.083e-06
ENSMUSG00000058589	Anks1b	ankyrin repeat and sterile alpha motif domain cont...	-0.3034	8.50749	8.20409	4.089e-06
ENSMUSG00000020849	Ywhae	tyrosine 3-monooxygenase/tryptophan 5-monooxygenas...	0.1936	9.62663	9.8202	4.115e-06
ENSMUSG00000005580	Adcy9	adenylate cyclase 9	-0.8465	6.34779	5.50132	4.127e-06
ENSMUSG00000043460	Elfn2	leucine rich repeat and fibronectin type III, extr...	-0.6068	7.09781	6.49096	4.218e-06
ENSMUSG00000030306	Tmtc1	transmembrane and tetratricopeptide repeat contain...	-0.4861	6.18386	5.69774	4.23e-06
ENSMUSG00000027971	Ndst4	N-deacetylase/N-sulfotransferase (heparin glucosam...	-1.02	4.09617	3.0757	4.243e-06
ENSMUSG00000044627	Swi5	SWI5 recombination repair homolog (yeast)	0.3589	6.68106	7.03991	4.356e-06
ENSMUSG00000021573	Tppp	tubulin polymerization promoting protein	-0.2746	9.20925	8.93466	4.411e-06
ENSMUSG00000040260	Daam2	dishevelled associated activator of morphogenesis ...	0.5284	7.1929	7.72128	4.444e-06
ENSMUSG00000029467	Atp2a2	ATPase, Ca++ transporting, cardiac muscle, slow tw...	-0.2917	9.55491	9.26324	4.531e-06
ENSMUSG00000005089	Slc1a2	solute carrier family 1 (glial high affinity gluta...	-0.4483	11.837	11.3887	4.548e-06
ENSMUSG00000060534	Dcc	deleted in colorectal carcinoma	-1.132	3.92282	2.79099	4.614e-06
ENSMUSG00000028041	Adam15	ADAM metallopeptidase domain 15	0.321	7.03641	7.3574	4.677e-06
ENSMUSG00000007989	Fzd3	frizzled class receptor 3	-1.063	3.98747	2.92435	4.733e-06
ENSMUSG00000018286	Psmb6	proteasome (prosome, macropain) subunit, beta type...	0.397	6.33615	6.73317	4.786e-06
ENSMUSG00000048279	Sacs	sacsin	-0.3913	6.84624	6.45495	4.786e-06
ENSMUSG00000062098	Btbd3	BTB domain containing 3	-0.5199	7.97433	7.4544	4.821e-06
ENSMUSG00000022619	Mapk8ip2	mitogen-activated protein kinase 8 interacting pro...	-0.2166	8.66704	8.45049	4.839e-06
ENSMUSG00000038147	Cd84	CD84 antigen	1.235	2.47142	3.7069	4.915e-06
ENSMUSG00000041556	Fbxo2	F-box protein 2	0.4316	6.18385	6.61549	4.965e-06
ENSMUSG00000033863	Klf9	Kruppel-like transcription factor 9	-0.3865	7.17862	6.79212	4.982e-06
ENSMUSG00000037805	Rpl10a	ribosomal protein L10A	0.4219	6.12747	6.54942	5.174e-06
ENSMUSG00000014195	Dnajc7	DnaJ heat shock protein family (Hsp40) member C7	0.2863	7.37464	7.66095	5.184e-06
ENSMUSG00000066687	Zbtb16	zinc finger and BTB domain containing 16	-0.6372	6.22399	5.58681	5.236e-06
ENSMUSG00000062209	Erbb4	erb-b2 receptor tyrosine kinase 4	-0.5498	5.98162	5.43186	5.267e-06
ENSMUSG00000017734	Dbndd2	dysbindin domain containing 2	0.668	7.06735	7.73532	5.4e-06
ENSMUSG00000073702	Rpl31	ribosomal protein L31	0.4822	6.43896	6.92119	5.417e-06
ENSMUSG00000022982	Sod1	superoxide dismutase 1, soluble	0.4582	7.1685	7.62671	5.417e-06
ENSMUSG00000031592	Pcm1	pericentriolar material 1	-0.3834	6.85796	6.47459	5.421e-06
ENSMUSG00000066232	Ipo7	importin 7	-0.421	6.62685	6.20585	5.521e-06
ENSMUSG00000040462	Os9	amplified in osteosarcoma	0.2801	7.44453	7.72465	5.587e-06
ENSMUSG00000024811	Tnks2	tankyrase, TRF1-interacting ankyrin-related ADP-ri...	-0.3301	7.28185	6.9518	5.653e-06
ENSMUSG00000034892	Rps29	ribosomal protein S29	0.5249	7.37808	7.90301	5.664e-06
ENSMUSG00000048078	Tenm4	teneurin transmembrane protein 4	-0.5096	7.43511	6.92552	5.664e-06
ENSMUSG00000021395	Spin1	spindlin 1	-0.2952	7.59266	7.29744	5.794e-06
ENSMUSG00000046718	Bst2	bone marrow stromal cell antigen 2	1.176	2.59545	3.77171	5.929e-06
ENSMUSG00000038539	Atf5	activating transcription factor 5	0.5591	5.24204	5.80116	5.929e-06
ENSMUSG00000037316	Bag4	BCL2-associated athanogene 4	-0.4656	6.31054	5.8449	6.005e-06
ENSMUSG00000051323	Pcdh19	protocadherin 19	-0.7247	6.36259	5.63791	6.056e-06
ENSMUSG00000060882	Kcnd2	potassium voltage-gated channel, Shal-related fami...	-0.4063	7.04173	6.63546	6.234e-06
ENSMUSG00000021301	Hecw1	HECT, C2 and WW domain containing E3 ubiquitin pro...	-0.6088	5.60432	4.99557	6.263e-06
ENSMUSG00000024338	Psmb8	proteasome (prosome, macropain) subunit, beta type...	1.204	2.53368	3.73815	6.393e-06
ENSMUSG00000040761	Spen	spen family transcription repressor	-0.3852	6.84067	6.45551	6.416e-06
ENSMUSG00000035614	Togaram1	TOG array regulator of axonemal microtubules 1	-0.5347	5.84806	5.31335	6.518e-06
ENSMUSG00000033917	Gde1	glycerophosphodiester phosphodiesterase 1	0.2962	7.23905	7.53529	6.518e-06
ENSMUSG00000007892	Rplp1	ribosomal protein lateral stalk subunit P1	0.4332	8.47616	8.90939	6.539e-06
ENSMUSG00000021699	Pde4d	phosphodiesterase 4D, cAMP specific	-0.7085	5.09928	4.39081	6.567e-06
ENSMUSG00000022311	Csmd3	CUB and Sushi multiple domains 3	-0.6758	5.14265	4.46684	6.886e-06
ENSMUSG00000021557	Agtpbp1	ATP/GTP binding protein 1	-0.2813	7.89975	7.61849	6.951e-06
ENSMUSG00000039485	Tspyl4	TSPY-like 4	-0.4006	9.04451	8.64388	7.01e-06
ENSMUSG00000059495	Arhgef12	Rho guanine nucleotide exchange factor 12	-0.2513	8.16812	7.91682	7.015e-06
ENSMUSG00000028132	Tlcd4	TLC domain containing 4	-0.6139	5.48066	4.86678	7.095e-06
ENSMUSG00000015165	Hnrnpl	heterogeneous nuclear ribonucleoprotein L	0.2324	7.99589	8.22831	7.217e-06
ENSMUSG00000030275	Etnk1	ethanolamine kinase 1	-0.2176	8.47876	8.26114	7.367e-06
ENSMUSG00000069072	Slc7a14	solute carrier family 7 (cationic amino acid trans...	-0.5298	7.88615	7.35634	7.573e-06
ENSMUSG00000066392	Nrxn3	neurexin III	-0.3066	7.71046	7.4039	7.573e-06
ENSMUSG00000028465	Tln1	talin 1	0.4168	6.17242	6.58927	7.882e-06
ENSMUSG00000047747	Rnf150	ring finger protein 150	-0.4148	6.69018	6.27536	7.882e-06
ENSMUSG00000022956	Atp5po	ATP synthase peripheral stalk subunit OSCP	0.3496	7.22943	7.57899	8.116e-06
ENSMUSG00000035847	Ids	iduronate 2-sulfatase	-0.3043	8.82279	8.51847	8.353e-06
ENSMUSG00000046230	Vps13a	vacuolar protein sorting 13A	-0.5252	5.89751	5.37235	8.412e-06
ENSMUSG00000026824	Kcnj3	potassium inwardly-rectifying channel, subfamily J...	-0.3415	7.3204	6.97894	8.412e-06
ENSMUSG00000031775	Pllp	plasma membrane proteolipid	0.6253	5.86226	6.48756	8.422e-06
ENSMUSG00000028333	Anp32b	acidic nuclear phosphoprotein 32 family member B	0.4671	5.75021	6.2173	8.435e-06
ENSMUSG00000085795	Zfp703	zinc finger protein 703	0.5781	5.03537	5.61349	8.455e-06
ENSMUSG00000021495	Fam193b	family with sequence similarity 193, member B	0.378	6.92346	7.30147	8.6e-06
ENSMUSG00000054452	Tle5	TLE family member 5, transcriptional modulator	0.3631	8.67477	9.03784	8.883e-06
ENSMUSG00000030744	Rps3	ribosomal protein S3	0.3789	7.79587	8.17481	8.949e-06
ENSMUSG00000033419	Snap91	synaptosomal-associated protein 91	-0.2854	8.50477	8.21933	8.987e-06
ENSMUSG00000022905	Kpna1	karyopherin subunit alpha 1	-0.3426	7.09392	6.75135	9.233e-06
ENSMUSG00000074212	Dnajb14	DnaJ heat shock protein family (Hsp40) member B14	-0.3438	7.10867	6.76489	9.244e-06
ENSMUSG00000039148	Sart1	squamous cell carcinoma antigen recognized by T ce...	0.3807	6.34359	6.72428	9.282e-06
ENSMUSG00000041624	Gucy1a2	guanylate cyclase 1, soluble, alpha 2	-1.232	3.53992	2.30825	9.435e-06
ENSMUSG00000048148	Nwd1	NACHT and WD repeat domain containing 1	-0.4216	6.51626	6.09466	9.435e-06
ENSMUSG00000025503	Taldo1	transaldolase 1	0.3966	6.24626	6.64285	9.542e-06
ENSMUSG00000023904	Hcfc1r1	host cell factor C1 regulator 1 (XPO1-dependent)	0.453	5.85563	6.30867	9.665e-06
ENSMUSG00000073982	Rhog	ras homolog family member G	0.6389	4.89455	5.53345	9.695e-06
ENSMUSG00000036833	Pnpla7	patatin-like phospholipase domain containing 7	0.5994	4.83855	5.4379	9.899e-06
ENSMUSG00000055531	Cpsf6	cleavage and polyadenylation specific factor 6	-0.4107	6.54903	6.13831	9.899e-06
ENSMUSG00000005161	Prdx2	peroxiredoxin 2	0.3053	7.22697	7.53224	9.975e-06
ENSMUSG00000037234	Hook3	hook microtubule tethering protein 3	-0.3969	6.60046	6.20356	1.001e-05
ENSMUSG00000020097	Sgpl1	sphingosine phosphate lyase 1	0.4992	5.50795	6.00712	1.003e-05
ENSMUSG00000018909	Arrb1	arrestin, beta 1	-0.2272	8.32265	8.09545	1.004e-05
ENSMUSG00000003814	Calr	calreticulin	0.2884	8.56766	8.8561	1.005e-05
ENSMUSG00000030806	Stx1b	syntaxin 1B	-0.2046	9.34959	9.14499	1.012e-05
ENSMUSG00000030077	Chl1	cell adhesion molecule L1-like	-0.4647	7.62825	7.1636	1.021e-05
ENSMUSG00000042523	Dnal1	dynein, axonemal, light chain 1	-0.3386	7.16743	6.82883	1.034e-05
ENSMUSG00000029211	Gabra4	gamma-aminobutyric acid type A receptor subunit al...	-0.4098	6.59037	6.18057	1.049e-05
ENSMUSG00000001175	Calm1	calmodulin 1	-0.2483	11.4049	11.1567	1.051e-05
ENSMUSG00000018846	Pank3	pantothenate kinase 3	-0.5002	5.93303	5.43278	1.056e-05
ENSMUSG00000068748	Ptprz1	protein tyrosine phosphatase receptor type Z, poly...	-0.3744	7.79236	7.41796	1.062e-05
ENSMUSG00000037341	Slc9a7	solute carrier family 9 (sodium/hydrogen exchanger...	-1.126	3.89821	2.77181	1.101e-05
ENSMUSG00000032536	Trak1	trafficking protein, kinesin binding 1	-0.2783	7.68316	7.40482	1.113e-05
ENSMUSG00000029673	Auts2	autism susceptibility candidate 2	-0.4627	6.99458	6.53187	1.132e-05
ENSMUSG00000033671	Cep350	centrosomal protein 350	-0.4611	6.17256	5.71148	1.132e-05
ENSMUSG00000079435	Rpl36a	ribosomal protein L36A	0.4563	5.7708	6.22711	1.132e-05
ENSMUSG00000019432	Ddx39b	DEAD box helicase 39b	0.2606	7.60508	7.86568	1.132e-05
ENSMUSG00000037902	Sirpa	signal-regulatory protein alpha	0.2394	8.68482	8.92424	1.132e-05
ENSMUSG00000057335	Cep170	centrosomal protein 170	-0.417	6.45852	6.04152	1.134e-05
ENSMUSG00000020189	Osbpl8	oxysterol binding protein-like 8	-0.4819	6.12172	5.63978	1.137e-05
ENSMUSG00000028478	Clta	clathrin light chain A	0.3011	7.17441	7.47552	1.141e-05
ENSMUSG00000046743	Fat4	FAT atypical cadherin 4	-0.674	5.47699	4.80296	1.142e-05
ENSMUSG00000068290	Ddrgk1	DDRGK domain containing 1	0.4247	6.00884	6.43354	1.145e-05
ENSMUSG00000025656	Arhgef9	CDC42 guanine nucleotide exchange factor 9	-0.2997	8.87033	8.57063	1.156e-05
ENSMUSG00000032009	Sesn3	sestrin 3	-0.834	4.61353	3.77955	1.162e-05
ENSMUSG00000010097	Nxf1	nuclear RNA export factor 1	0.3188	6.97016	7.28897	1.168e-05
ENSMUSG00000036273	Lrrk2	leucine-rich repeat kinase 2	-0.6707	5.16882	4.49813	1.169e-05
ENSMUSG00000037855	Zfp365	zinc finger protein 365	-0.4312	8.49099	8.05979	1.176e-05
ENSMUSG00000022194	Pabpn1	poly(A) binding protein, nuclear 1	0.2941	7.20319	7.49724	1.195e-05
ENSMUSG00000036854	Hspb6	heat shock protein, alpha-crystallin-related, B6	1.014	3.03345	4.04774	1.209e-05
ENSMUSG00000022390	Zc3h7b	zinc finger CCCH type containing 7B	-0.2382	8.08724	7.84906	1.214e-05
ENSMUSG00000061601	Pclo	piccolo (presynaptic cytomatrix protein)	-0.4932	8.38971	7.89654	1.248e-05
ENSMUSG00000022351	Sqle	squalene epoxidase	-0.5206	5.86207	5.34152	1.249e-05
ENSMUSG00000091264	Smim13	small integral membrane protein 13	-0.2829	7.62318	7.34032	1.265e-05
ENSMUSG00000030209	Grin2b	glutamate receptor, ionotropic, NMDA2B (epsilon 2)	-0.6666	9.34308	8.67652	1.269e-05
ENSMUSG00000035093	Secisbp2l	SECIS binding protein 2-like	-0.3242	7.27846	6.95425	1.281e-05
ENSMUSG00000034647	Ankrd12	ankyrin repeat domain 12	-0.4444	6.34172	5.89735	1.289e-05
ENSMUSG00000026260	Ndufa10	NADH:ubiquinone oxidoreductase subunit A10	0.29	7.30841	7.59842	1.289e-05
ENSMUSG00000008763	Man1a2	mannosidase, alpha, class 1A, member 2	-0.3773	6.75274	6.37541	1.297e-05
ENSMUSG00000039615	Stub1	STIP1 homology and U-Box containing protein 1	0.3354	6.7741	7.10946	1.299e-05
ENSMUSG00000018548	Trim37	tripartite motif-containing 37	-0.268	8.38262	8.11457	1.302e-05
ENSMUSG00000048264	Dip2c	disco interacting protein 2 homolog C	-0.3844	6.704	6.3196	1.304e-05
ENSMUSG00000018398	Septin8	septin 8	0.2074	8.41556	8.62301	1.304e-05
ENSMUSG00000029804	Herc3	hect domain and RLD 3	-0.3595	7.39864	7.0391	1.326e-05
ENSMUSG00000027248	Pdia3	protein disulfide isomerase associated 3	0.2763	7.45778	7.73412	1.326e-05
ENSMUSG00000019210	Atp6v1e1	ATPase, H+ transporting, lysosomal V1 subunit E1	0.2221	8.16809	8.3902	1.327e-05
ENSMUSG00000022533	Atp13a3	ATPase type 13A3	-0.4878	6.07125	5.58347	1.352e-05
ENSMUSG00000074505	Fat3	FAT atypical cadherin 3	-0.4311	6.37669	5.94555	1.358e-05
ENSMUSG00000020154	Ptprb	protein tyrosine phosphatase receptor type B	-0.6125	5.35554	4.74305	1.424e-05
ENSMUSG00000034687	Fras1	Fraser extracellular matrix complex subunit 1	-0.6569	5.09691	4.44002	1.425e-05
ENSMUSG00000037416	Dmxl1	Dmx-like 1	-0.4618	6.15313	5.69129	1.435e-05
ENSMUSG00000047193	Dync2h1	dynein cytoplasmic 2 heavy chain 1	-0.5594	5.53274	4.97339	1.436e-05
ENSMUSG00000070304	Scn2b	sodium channel, voltage-gated, type II, beta	-0.2347	8.31979	8.08506	1.49e-05
ENSMUSG00000073514	Dok6	docking protein 6	-1.173	3.63209	2.45877	1.492e-05
ENSMUSG00000020580	Rock2	Rho-associated coiled-coil containing protein kina...	-0.2873	7.87635	7.58906	1.492e-05
ENSMUSG00000054793	Cadm4	cell adhesion molecule 4	0.4456	7.50356	7.94913	1.495e-05
ENSMUSG00000044786	Zfp36	zinc finger protein 36	1.057	2.87177	3.92925	1.513e-05
ENSMUSG00000026596	Abl2	ABL proto-oncogene 2, non-receptor tyrosine kinase	-0.4126	6.74047	6.32784	1.591e-05
ENSMUSG00000018707	Dync1h1	dynein cytoplasmic 1 heavy chain 1	-0.2398	9.61496	9.37511	1.591e-05
ENSMUSG00000048537	Phldb1	pleckstrin homology like domain, family B, member ...	0.4998	7.3754	7.87517	1.607e-05
ENSMUSG00000006356	Crip2	cysteine rich protein 2	0.4761	6.04366	6.51973	1.608e-05
ENSMUSG00000026834	Acvr1c	activin A receptor, type IC	-0.8663	4.40193	3.53565	1.612e-05
ENSMUSG00000029787	Avl9	AVL9 cell migration associated	-0.5006	5.88091	5.38031	1.621e-05
ENSMUSG00000033618	Map3k13	mitogen-activated protein kinase kinase kinase 13	-0.7595	4.75933	3.99982	1.628e-05
ENSMUSG00000032625	Thsd7a	thrombospondin, type I, domain containing 7A	-0.5787	5.60424	5.02549	1.628e-05
ENSMUSG00000037996	Slc24a2	solute carrier family 24 (sodium/potassium/calcium...	-0.3924	9.47989	9.08752	1.64e-05
ENSMUSG00000030057	Cnbp	cellular nucleic acid binding protein	0.2468	7.73405	7.98083	1.645e-05
ENSMUSG00000004285	Atp6v1f	ATPase, H+ transporting, lysosomal V1 subunit F	0.3927	6.22714	6.61984	1.701e-05
ENSMUSG00000049336	Tenm2	teneurin transmembrane protein 2	-0.4378	7.55644	7.11868	1.708e-05
ENSMUSG00000024516	Sec11c	SEC11 homolog C, signal peptidase complex subunit	0.403	6.12964	6.53265	1.72e-05
ENSMUSG00000024308	Tapbp	TAP binding protein	0.5629	5.06717	5.63009	1.727e-05
ENSMUSG00000013921	Clip3	CAP-GLY domain containing linker protein 3	0.2116	9.28185	9.49349	1.739e-05
ENSMUSG00000041992	Rapgef5	Rap guanine nucleotide exchange factor (GEF) 5	-0.6808	6.6664	5.98558	1.741e-05
ENSMUSG00000060938	Rpl26	ribosomal protein L26	0.5523	7.07419	7.62651	1.766e-05
ENSMUSG00000026219	Trip12	thyroid hormone receptor interactor 12	-0.2712	7.71069	7.43947	1.774e-05
ENSMUSG00000020590	Snx13	sorting nexin 13	-0.4226	6.37774	5.95515	1.813e-05
ENSMUSG00000020923	Ubtf	upstream binding transcription factor, RNA polymer...	0.2764	7.29953	7.57595	1.813e-05
ENSMUSG00000025272	Tro	trophinin	-0.2646	7.84403	7.57944	1.85e-05
ENSMUSG00000001270	Ckb	creatine kinase, brain	0.5025	9.82946	10.332	1.857e-05
ENSMUSG00000029465	Arpc3	actin related protein 2/3 complex, subunit 3	0.3176	6.91686	7.2345	1.907e-05
ENSMUSG00000045589	Frrs1l	ferric-chelate reductase 1 like	-0.421	8.48952	8.06848	1.912e-05
ENSMUSG00000037111	Setd7	SET domain containing (lysine methyltransferase) 7	-0.2753	7.76404	7.48873	1.916e-05
ENSMUSG00000038690	Atp5mf	ATP synthase membrane subunit f	0.4321	6.42807	6.86013	1.935e-05
ENSMUSG00000057614	Gnai1	G protein subunit alpha i1	-0.3335	7.13367	6.80016	1.94e-05
ENSMUSG00000020263	Appl2	adaptor protein, phosphotyrosine interaction, PH d...	0.4	7.13077	7.53073	1.952e-05
ENSMUSG00000033350	Chst2	carbohydrate sulfotransferase 2	0.3306	7.58004	7.91061	1.952e-05
ENSMUSG00000036199	Ndufa13	NADH:ubiquinone oxidoreductase subunit A13	0.3846	6.8503	7.23494	1.959e-05
ENSMUSG00000074129	Rpl13a	ribosomal protein L13A	0.4753	8.25046	8.72572	1.973e-05
ENSMUSG00000040209	Zfp704	zinc finger protein 704	-0.4	6.49661	6.09663	2e-05
ENSMUSG00000039716	Dock3	dedicator of cyto-kinesis 3	-0.3534	7.8865	7.53306	2.002e-05
ENSMUSG00000027002	Nckap1	NCK-associated protein 1	-0.3573	9.40266	9.04535	2.009e-05
ENSMUSG00000004110	Cacna1e	calcium channel, voltage-dependent, R type, alpha ...	-0.5027	8.97089	8.46822	2.026e-05
ENSMUSG00000050121	Opalin	oligodendrocytic myelin paranodal and inner loop p...	0.6606	4.70319	5.36377	2.043e-05
ENSMUSG00000026185	Igfbp5	insulin-like growth factor binding protein 5	0.5454	8.12009	8.66549	2.045e-05
ENSMUSG00000034566	Atp5pd	ATP synthase peripheral stalk subunit d	0.385	7.16302	7.54802	2.069e-05
ENSMUSG00000022206	Npr3	natriuretic peptide receptor 3	-0.822	4.80881	3.98677	2.098e-05
ENSMUSG00000037405	Icam1	intercellular adhesion molecule 1	1.24	2.26239	3.50191	2.111e-05
ENSMUSG00000059714	Flot1	flotillin 1	0.3273	6.71841	7.04568	2.132e-05
ENSMUSG00000102697	Pcdhac2	protocadherin alpha subfamily C, 2	-0.3419	7.07298	6.73105	2.311e-05
ENSMUSG00000025555	Farp1	FERM, ARH/RhoGEF and pleckstrin domain protein 1	0.3689	6.52692	6.89578	2.326e-05
ENSMUSG00000007815	Rhoa	ras homolog family member A	0.3047	7.04463	7.34936	2.344e-05
ENSMUSG00000028270	Gbp2	guanylate binding protein 2	1.08	2.61453	3.6945	2.353e-05
ENSMUSG00000024897	Apba1	amyloid beta precursor protein binding family A me...	-0.2436	7.97457	7.73102	2.359e-05
ENSMUSG00000035697	Arhgap45	Rho GTPase activating protein 45	0.8216	3.74645	4.56805	2.381e-05
ENSMUSG00000019804	Snx3	sorting nexin 3	0.3059	6.92341	7.22932	2.381e-05
ENSMUSG00000094910	D430019H16Rik	RIKEN cDNA D430019H16 gene	-0.5861	7.68293	7.09688	2.383e-05
ENSMUSG00000032097	Ddx6	DEAD-box helicase 6	-0.2688	7.63606	7.36731	2.411e-05
ENSMUSG00000020680	Taf15	TATA-box binding protein associated factor 15	0.3919	6.13695	6.52887	2.42e-05
ENSMUSG00000029561	Oasl2	2'-5' oligoadenylate synthetase-like 2	1.636	2.90931	4.54567	2.497e-05
ENSMUSG00000020585	Laptm4a	lysosomal-associated protein transmembrane 4A	0.2813	7.59451	7.87584	2.53e-05
ENSMUSG00000040048	Ndufb10	NADH:ubiquinone oxidoreductase subunit B10	0.3652	6.65662	7.02187	2.539e-05
ENSMUSG00000075706	Gpx4	glutathione peroxidase 4	0.391	7.12733	7.5183	2.542e-05
ENSMUSG00000029636	Wasf3	WASP family, member 3	-0.3252	7.09162	6.76646	2.64e-05
ENSMUSG00000024330	Col11a2	collagen, type XI, alpha 2	0.4645	5.61496	6.07949	2.658e-05
ENSMUSG00000015709	Arnt2	aryl hydrocarbon receptor nuclear translocator 2	-0.2128	8.42466	8.2119	2.658e-05
ENSMUSG00000033009	Ogfod1	2-oxoglutarate and iron-dependent oxygenase domain...	-0.314	7.20896	6.895	2.736e-05
ENSMUSG00000031839	Hsbp1	heat shock factor binding protein 1	0.2614	7.46286	7.72428	2.736e-05
ENSMUSG00000005610	Eif4g2	eukaryotic translation initiation factor 4, gamma ...	-0.1917	9.27712	9.08538	2.752e-05
ENSMUSG00000022500	Litaf	LPS-induced TN factor	0.6553	4.45023	5.10553	2.828e-05
ENSMUSG00000033900	Map9	microtubule-associated protein 9	-0.3513	6.97369	6.6224	2.839e-05
ENSMUSG00000022389	Tef	thyrotroph embryonic factor	-0.2031	8.56477	8.36164	2.853e-05
ENSMUSG00000032637	Atxn2l	ataxin 2-like	0.248	7.76346	8.0115	2.879e-05
ENSMUSG00000033938	Ndufb7	NADH:ubiquinone oxidoreductase subunit B7	0.4263	5.92932	6.35567	2.919e-05
ENSMUSG00000040929	Rfx3	regulatory factor X, 3 (influences HLA class II ex...	-0.6622	6.48484	5.8226	2.933e-05
ENSMUSG00000029649	Pomp	proteasome maturation protein	0.401	6.12259	6.52362	2.952e-05
ENSMUSG00000055540	Epha6	Eph receptor A6	-0.9121	5.55985	4.64772	2.954e-05
ENSMUSG00000020114	Cand1	cullin associated and neddylation disassociated 1	-0.3072	7.26802	6.9608	2.984e-05
ENSMUSG00000032826	Ank2	ankyrin 2, brain	-0.2429	9.66107	9.41817	2.992e-05
ENSMUSG00000029616	Erp29	endoplasmic reticulum protein 29	0.395	6.10349	6.49846	3.033e-05
ENSMUSG00000003068	Stk11	serine/threonine kinase 11	0.3785	6.22241	6.60088	3.033e-05
ENSMUSG00000030088	Aldh1l1	aldehyde dehydrogenase 1 family, member L1	0.4182	6.05945	6.47766	3.035e-05
ENSMUSG00000005533	Igf1r	insulin-like growth factor I receptor	-0.7749	4.67497	3.90003	3.036e-05
ENSMUSG00000024924	Vldlr	very low density lipoprotein receptor	-0.389	6.56166	6.17265	3.084e-05
ENSMUSG00000062593	Lilrb4a	leukocyte immunoglobulin-like receptor, subfamily ...	1.627	1.1517	2.7787	3.135e-05
ENSMUSG00000028080	Lrba	LPS-responsive beige-like anchor	-0.5557	5.44995	4.8942	3.149e-05
ENSMUSG00000001123	Lgals9	lectin, galactose binding, soluble 9	0.9092	3.22301	4.13217	3.155e-05
ENSMUSG00000029439	Sfswap	splicing factor SWAP	0.3353	6.65018	6.98544	3.237e-05
ENSMUSG00000037266	Rsrp1	arginine/serine rich protein 1	0.3688	8.50989	8.8787	3.241e-05
ENSMUSG00000061755	Bod1l	biorientation of chromosomes in cell division 1-li...	-0.3675	6.64291	6.2754	3.247e-05
ENSMUSG00000032532	Cck	cholecystokinin	0.3837	7.33116	7.71488	3.316e-05
ENSMUSG00000040446	Rprd1a	regulation of nuclear pre-mRNA domain containing 1...	-0.4388	6.24521	5.80639	3.319e-05
ENSMUSG00000007721	Ccdc124	coiled-coil domain containing 124	0.3841	6.21399	6.59805	3.319e-05
ENSMUSG00000058690	Ccser2	coiled-coil serine rich 2	-0.3376	6.89402	6.55643	3.366e-05
ENSMUSG00000042116	Vwa1	von Willebrand factor A domain containing 1	0.6138	4.68461	5.29843	3.39e-05
ENSMUSG00000062184	Hs6st2	heparan sulfate 6-O-sulfotransferase 2	-0.6768	5.02726	4.35042	3.402e-05
ENSMUSG00000031386	Hcfc1	host cell factor C1	-0.3028	7.27954	6.97675	3.422e-05
ENSMUSG00000032231	Anxa2	annexin A2	0.8463	3.63676	4.48308	3.441e-05
ENSMUSG00000047126	Cltc	clathrin heavy chain	-0.2773	9.17485	8.8976	3.474e-05
ENSMUSG00000032324	Tspan3	tetraspanin 3	0.2361	7.88869	8.12477	3.506e-05
ENSMUSG00000074896	Ifit3	interferon-induced protein with tetratricopeptide ...	1.318	3.79195	5.11025	3.535e-05
ENSMUSG00000068328	Aup1	ancient ubiquitous protein 1	0.3967	6.08246	6.47915	3.544e-05
ENSMUSG00000032549	Rab6b	RAB6B, member RAS oncogene family	-0.1485	9.93043	9.78196	3.673e-05
ENSMUSG00000021945	Zmym2	zinc finger, MYM-type 2	-0.3783	6.57047	6.19214	3.688e-05
ENSMUSG00000017412	Cacnb4	calcium channel, voltage-dependent, beta 4 subunit	-0.4297	7.0881	6.65842	3.693e-05
ENSMUSG00000026480	Ncf2	neutrophil cytosolic factor 2	1.122	2.56584	3.68791	3.707e-05
ENSMUSG00000024816	Frmd8	FERM domain containing 8	0.6024	4.71405	5.31643	3.709e-05
ENSMUSG00000039697	Ncoa7	nuclear receptor coactivator 7	-0.4276	6.2414	5.81381	3.709e-05
ENSMUSG00000032193	Ldlr	low density lipoprotein receptor	-0.7087	4.78219	4.07353	3.725e-05
ENSMUSG00000037014	Sstr4	somatostatin receptor 4	-0.934	4.22048	3.28647	3.785e-05
ENSMUSG00000020220	Vps13d	vacuolar protein sorting 13D	-0.289	7.38721	7.09822	3.788e-05
ENSMUSG00000043535	Setx	senataxin	-0.3801	6.54704	6.16696	3.814e-05
ENSMUSG00000062760	Shisal1	shisa like 1	-0.4259	6.41743	5.99157	3.821e-05
ENSMUSG00000030541	Idh2	isocitrate dehydrogenase 2 (NADP+), mitochondrial	0.4551	5.60207	6.05713	3.945e-05
ENSMUSG00000032740	Ccdc88a	coiled coil domain containing 88A	-0.4205	6.26101	5.84048	4.014e-05
ENSMUSG00000033475	Tomm6	translocase of outer mitochondrial membrane 6	0.36	6.45071	6.81074	4.03e-05
ENSMUSG00000024953	Prdx5	peroxiredoxin 5	0.3	7.27448	7.57445	4.069e-05
ENSMUSG00000034480	Diaph2	diaphanous related formin 2	-0.6688	4.95594	4.28713	4.091e-05
ENSMUSG00000024286	Ccny	cyclin Y	-0.3561	6.74733	6.39123	4.091e-05
ENSMUSG00000038738	Shank1	SH3 and multiple ankyrin repeat domains 1	-0.3416	9.45583	9.11424	4.141e-05
ENSMUSG00000021493	Pdlim7	PDZ and LIM domain 7	0.4235	5.84259	6.26607	4.154e-05
ENSMUSG00000063856	Gpx1	glutathione peroxidase 1	0.5404	5.31493	5.85534	4.246e-05
ENSMUSG00000054814	Usp46	ubiquitin specific peptidase 46	-0.3272	7.05942	6.73218	4.309e-05
ENSMUSG00000033624	Pdpr	pyruvate dehydrogenase phosphatase regulatory subu...	-0.6912	4.86335	4.17212	4.348e-05
ENSMUSG00000019947	Arid5b	AT-rich interaction domain 5B	-0.7806	4.5475	3.76688	4.351e-05
ENSMUSG00000030272	Camk1	calcium/calmodulin-dependent protein kinase I	0.4683	5.55433	6.02261	4.351e-05
ENSMUSG00000015714	Cers2	ceramide synthase 2	0.4023	6.11767	6.51997	4.351e-05
ENSMUSG00000021910	Nisch	nischarin	-0.151	9.30966	9.15868	4.356e-05
ENSMUSG00000027272	Ubr1	ubiquitin protein ligase E3 component n-recognin 1	-0.4327	6.15966	5.72698	4.401e-05
ENSMUSG00000042599	Kdm7a	lysine (K)-specific demethylase 7A	-0.459	6.20451	5.74552	4.41e-05
ENSMUSG00000084786	Ubl5	ubiquitin-like 5	0.4084	5.98087	6.38931	4.41e-05
ENSMUSG00000034993	Vat1	vesicle amine transport 1	0.5456	5.31974	5.86537	4.422e-05
ENSMUSG00000032399	Rpl4	ribosomal protein L4	0.2881	8.99039	9.27853	4.423e-05
ENSMUSG00000002028	Kmt2a	lysine (K)-specific methyltransferase 2A	-0.296	7.83795	7.54194	4.426e-05
ENSMUSG00000044117	Bmerb1	bMERB domain containing 1	0.2813	8.02662	8.30795	4.426e-05
ENSMUSG00000051331	Cacna1c	calcium channel, voltage-dependent, L type, alpha ...	-0.346	7.18104	6.83508	4.463e-05
ENSMUSG00000033307	Mif	macrophage migration inhibitory factor (glycosylat...	0.3709	6.35336	6.72425	4.478e-05
ENSMUSG00000052534	Pbx1	pre B cell leukemia homeobox 1	-0.2707	7.53166	7.26091	4.478e-05
ENSMUSG00000037236	Matr3	matrin 3	-0.2272	8.60532	8.37811	4.523e-05
ENSMUSG00000020388	Pdlim4	PDZ and LIM domain 4	0.846	3.5581	4.40414	4.548e-05
ENSMUSG00000044894	Uqcrq	ubiquinol-cytochrome c reductase, complex III subu...	0.3673	6.30115	6.66844	4.605e-05
ENSMUSG00000030798	Cd37	CD37 antigen	0.9831	2.98593	3.96898	4.624e-05
ENSMUSG00000062488	Ifit3b	interferon-induced protein with tetratricopeptide ...	1.065	3.007	4.07238	4.658e-05
ENSMUSG00000049422	Chchd10	coiled-coil-helix-coiled-coil-helix domain contain...	0.4632	6.40139	6.86457	4.7e-05
ENSMUSG00000063887	Nlgn1	neuroligin 1	-0.4661	6.28747	5.82137	4.735e-05
ENSMUSG00000025427	Ark2c	arkadia (RNF111) C-terminal like ring finger ubiqu...	-0.5006	6.69453	6.19392	4.77e-05
ENSMUSG00000027350	Chgb	chromogranin B	0.3736	9.4603	9.83385	4.79e-05
ENSMUSG00000038612	Mcl1	myeloid cell leukemia sequence 1	0.3709	6.2138	6.58473	4.821e-05
ENSMUSG00000054843	Atrnl1	attractin like 1	-0.3637	6.68321	6.31955	4.821e-05
ENSMUSG00000027162	Lin7c	lin-7 homolog C, crumbs cell polarity complex comp...	-0.3826	6.57891	6.19633	4.835e-05
ENSMUSG00000003949	Hlf	hepatic leukemia factor	-0.4662	7.52792	7.06176	4.854e-05
ENSMUSG00000079444	Gm21981	predicted gene 21981	0.3472	6.54602	6.89317	4.856e-05
ENSMUSG00000052142	Rasal3	RAS protein activator like 3	1.044	2.71911	3.76313	4.863e-05
ENSMUSG00000032412	Atp1b3	ATPase, Na+/K+ transporting, beta 3 polypeptide	0.4661	6.6284	7.0945	4.874e-05
ENSMUSG00000031540	Kat6a	K(lysine) acetyltransferase 6A	-0.3982	6.41132	6.01315	4.891e-05
ENSMUSG00000041710	Trpc5	transient receptor potential cation channel, subfa...	-0.9887	4.03588	3.0472	4.951e-05
ENSMUSG00000026083	Eif5b	eukaryotic translation initiation factor 5B	0.2957	6.95376	7.24945	4.986e-05
ENSMUSG00000033981	Gria2	glutamate receptor, ionotropic, AMPA2 (alpha 2)	-0.3973	9.55787	9.16059	4.992e-05
ENSMUSG00000023495	Pcbp4	poly(rC) binding protein 4	0.2777	7.23758	7.5153	4.994e-05
ENSMUSG00000021779	Thrb	thyroid hormone receptor beta	-0.5188	5.64229	5.12345	5.161e-05
ENSMUSG00000055373	Fut9	fucosyltransferase 9	-0.5067	6.06001	5.5533	5.193e-05
ENSMUSG00000006941	Eif1b	eukaryotic translation initiation factor 1B	0.3399	6.46841	6.80829	5.222e-05
ENSMUSG00000016252	Atp5f1e	ATP synthase F1 subunit epsilon	0.4313	5.76179	6.19308	5.32e-05
ENSMUSG00000026604	Ptpn14	protein tyrosine phosphatase, non-receptor type 14	-0.7794	4.49554	3.71614	5.321e-05
ENSMUSG00000074746	Pdzd8	PDZ domain containing 8	-0.4315	6.11424	5.68276	5.321e-05
ENSMUSG00000056999	Ide	insulin degrading enzyme	-0.4471	6.71068	6.26358	5.39e-05
ENSMUSG00000044811	Cd300c2	CD300C molecule 2	1.138	2.41908	3.55694	5.453e-05
ENSMUSG00000063358	Mapk1	mitogen-activated protein kinase 1	-0.3341	9.27929	8.94524	5.542e-05
ENSMUSG00000064115	Cadm2	cell adhesion molecule 2	-0.3656	7.5391	7.1735	5.557e-05
ENSMUSG00000030020	Prickle2	prickle planar cell polarity protein 2	-0.5338	8.3251	7.79128	5.56e-05
ENSMUSG00000035877	Zhx3	zinc fingers and homeoboxes 3	-0.3794	6.58123	6.20179	5.616e-05
ENSMUSG00000022995	Enah	ENAH actin regulator	-0.2507	7.80887	7.55815	5.626e-05
ENSMUSG00000025145	Lrrc45	leucine rich repeat containing 45	0.3803	6.17355	6.5538	5.647e-05
ENSMUSG00000068747	Sort1	sortilin 1	-0.2839	9.46878	9.18492	5.648e-05
ENSMUSG00000035681	Kcnc2	potassium voltage gated channel, Shaw-related subf...	-0.4597	6.83294	6.37327	5.707e-05
ENSMUSG00000018199	Ro60	Ro60, Y RNA binding protein	-0.5201	5.63917	5.11906	5.72e-05
ENSMUSG00000041923	Nol4	nucleolar protein 4	-0.4323	6.14484	5.71255	5.735e-05
ENSMUSG00000062232	Rapgef2	Rap guanine nucleotide exchange factor (GEF) 2	-0.4202	7.68102	7.26077	5.803e-05
ENSMUSG00000014164	Klhl3	kelch-like 3	-0.6483	5.14405	4.49577	5.824e-05
ENSMUSG00000024474	Ik	IK cytokine	0.2849	7.09837	7.38323	5.849e-05
ENSMUSG00000022139	Mbnl2	muscleblind like splicing factor 2	-0.2571	7.70423	7.44712	5.853e-05
ENSMUSG00000024661	Fth1	ferritin heavy polypeptide 1	0.4313	11.0487	11.48	5.86e-05
ENSMUSG00000027523	Gnas	GNAS complex locus	0.2304	10.4243	10.6547	5.941e-05
ENSMUSG00000002833	Hdgfl2	HDGF like 2	0.3129	6.70766	7.0206	5.993e-05
ENSMUSG00000033730	Egr3	early growth response 3	-0.7726	5.48335	4.71071	5.995e-05
ENSMUSG00000046434	Hnrnpa1	heterogeneous nuclear ribonucleoprotein A1	0.2371	7.62405	7.86114	6.046e-05
ENSMUSG00000015829	Tnr	tenascin R	-0.3471	8.00797	7.66088	6.051e-05
ENSMUSG00000021057	Akap5	A kinase anchor protein 5	-0.4935	6.38759	5.89407	6.079e-05
ENSMUSG00000036752	Tubb4b	tubulin, beta 4B class IVB	0.2488	7.61658	7.86534	6.12e-05
ENSMUSG00000046312	Myorg	myogenesis regulating glycosidase (putative)	-0.5772	5.32786	4.75069	6.123e-05
ENSMUSG00000040003	Magi2	membrane associated guanylate kinase, WW and PDZ d...	-0.3387	6.85741	6.51875	6.123e-05
ENSMUSG00000001383	Zmat2	zinc finger, matrin type 2	0.2409	7.56802	7.80894	6.123e-05
ENSMUSG00000081534	Slc48a1	solute carrier family 48 (heme transporter), membe...	0.314	7.0991	7.41308	6.141e-05
ENSMUSG00000007041	Clic1	chloride intracellular channel 1	0.8807	3.40247	4.28314	6.156e-05
ENSMUSG00000022831	Hcls1	hematopoietic cell specific Lyn substrate 1	0.9661	3.04811	4.01417	6.183e-05
ENSMUSG00000061904	Slc25a3	solute carrier family 25 (mitochondrial carrier, p...	0.2344	8.31551	8.54992	6.359e-05
ENSMUSG00000027184	Caprin1	cell cycle associated protein 1	-0.2551	7.76964	7.51455	6.47e-05
ENSMUSG00000052353	Cemip	cell migration inducing protein, hyaluronan bindin...	-0.6218	5.21958	4.59781	6.488e-05
ENSMUSG00000026782	Abi2	abl interactor 2	-0.297	7.67448	7.37748	6.504e-05
ENSMUSG00000027351	Spred1	sprouty protein with EVH-1 domain 1, related seque...	-0.3274	6.90101	6.57365	6.551e-05
ENSMUSG00000061477	Rps7	ribosomal protein S7	0.2878	7.13974	7.42758	6.556e-05
ENSMUSG00000040407	Akap9	A kinase anchor protein 9	-0.393	6.4665	6.07346	6.643e-05
ENSMUSG00000019054	Fis1	fission, mitochondrial 1	0.377	6.5497	6.92666	6.668e-05
ENSMUSG00000027397	Slc20a1	solute carrier family 20, member 1	0.2985	7.35211	7.65061	6.668e-05
ENSMUSG00000025757	Hspa4l	heat shock protein 4 like	-0.3235	7.47293	7.14947	6.692e-05
ENSMUSG00000004980	Hnrnpa2b1	heterogeneous nuclear ribonucleoprotein A2/B1	0.2723	8.88627	9.15861	6.774e-05
ENSMUSG00000029819	Npy	neuropeptide Y	0.5468	5.46757	6.01433	6.853e-05
ENSMUSG00000022636	Alcam	activated leukocyte cell adhesion molecule	-0.332	6.90958	6.57756	6.886e-05
ENSMUSG00000052928	Ctif	CBP80/20-dependent translation initiation factor	-0.3506	6.79606	6.44548	7.174e-05
ENSMUSG00000043301	Kcnj6	potassium inwardly-rectifying channel, subfamily J...	-0.7937	4.99633	4.20261	7.211e-05
ENSMUSG00000042675	Ypel3	yippee like 3	0.3216	6.77385	7.09545	7.216e-05
ENSMUSG00000041959	S100a10	S100 calcium binding protein A10 (calpactin)	0.7504	3.81916	4.56958	7.218e-05
ENSMUSG00000035545	Leng8	leukocyte receptor cluster (LRC) member 8	0.3068	8.57093	8.87775	7.248e-05
ENSMUSG00000034187	Nsf	N-ethylmaleimide sensitive fusion protein	-0.2495	10.1634	9.9139	7.301e-05
ENSMUSG00000022285	Ywhaz	tyrosine 3-monooxygenase/tryptophan 5-monooxygenas...	0.1401	9.67642	9.81648	7.336e-05
ENSMUSG00000060636	Rpl35a	ribosomal protein L35A	0.4849	6.14459	6.62953	7.384e-05
ENSMUSG00000022091	Sorbs3	sorbin and SH3 domain containing 3	0.4834	5.53147	6.01491	7.386e-05
ENSMUSG00000036006	Ripor2	RHO family interacting cell polarization regulator...	-0.4082	6.33709	5.92893	7.395e-05
ENSMUSG00000062014	Gmfb	glia maturation factor, beta	-0.2939	7.45457	7.16071	7.427e-05
ENSMUSG00000040033	Stat2	signal transducer and activator of transcription 2	0.508	5.23745	5.74549	7.471e-05
ENSMUSG00000030681	Mvp	major vault protein	0.7871	3.71691	4.50399	7.504e-05
ENSMUSG00000039414	Heatr5b	HEAT repeat containing 5B	-0.4888	5.74531	5.25648	7.534e-05
ENSMUSG00000026547	Tagln2	transgelin 2	0.8376	3.54268	4.38026	7.541e-05
ENSMUSG00000039001	Rps21	ribosomal protein S21	0.4118	7.00034	7.41217	7.572e-05
ENSMUSG00000005045	Chd5	chromodomain helicase DNA binding protein 5	-0.3024	8.41916	8.11681	7.597e-05
ENSMUSG00000079641	Rpl39	ribosomal protein L39	0.4898	5.3338	5.82362	7.61e-05
ENSMUSG00000045294	Insig1	insulin induced gene 1	-0.4822	5.88076	5.39855	7.61e-05
ENSMUSG00000033006	Sox10	SRY (sex determining region Y)-box 10	0.4664	5.80579	6.27224	7.639e-05
ENSMUSG00000006800	Sulf2	sulfatase 2	0.2788	7.23053	7.50933	7.836e-05
ENSMUSG00000055296	Tmem245	transmembrane protein 245	-0.3731	6.53782	6.16476	7.847e-05
ENSMUSG00000053465	Hs6st3	heparan sulfate 6-O-sulfotransferase 3	-1.04	3.70483	2.66485	7.862e-05
ENSMUSG00000030655	Smg1	SMG1 nonsense mediated mRNA decay associated PI3K ...	-0.3062	7.7301	7.42387	7.888e-05
ENSMUSG00000027692	Tnik	TRAF2 and NCK interacting kinase	-0.2433	8.03227	7.789	7.992e-05
ENSMUSG00000025314	Ptprj	protein tyrosine phosphatase receptor type J	-0.3608	7.10879	6.74799	8.073e-05
ENSMUSG00000022973	Synj1	synaptojanin 1	-0.4191	9.02184	8.60271	8.113e-05
ENSMUSG00000041771	Slc24a4	solute carrier family 24 (sodium/potassium/calcium...	-0.6452	5.01167	4.36644	8.169e-05
ENSMUSG00000020607	Lratd1	LRAT domain containing 1	-0.5341	6.43085	5.89677	8.177e-05
ENSMUSG00000026721	Rabgap1l	RAB GTPase activating protein 1-like	-0.3547	7.21809	6.86339	8.214e-05
ENSMUSG00000036751	Cox6b1	cytochrome c oxidase, subunit 6B1	0.3317	7.13212	7.46384	8.214e-05
ENSMUSG00000050321	Neto1	neuropilin (NRP) and tolloid (TLL)-like 1	-0.7355	6.54021	5.80473	8.256e-05
ENSMUSG00000071866	Ppia	peptidylprolyl isomerase A	0.3139	8.39391	8.70784	8.335e-05
ENSMUSG00000029778	Adcyap1r1	adenylate cyclase activating polypeptide 1 recepto...	-0.2782	7.97117	7.69296	8.437e-05
ENSMUSG00000062825	Actg1	actin, gamma, cytoplasmic 1	0.1661	8.72461	8.89068	8.456e-05
ENSMUSG00000071644	Eef1g	eukaryotic translation elongation factor 1 gamma	0.2651	7.38263	7.64773	8.639e-05
ENSMUSG00000022044	Stmn4	stathmin-like 4	0.5091	7.43715	7.94627	8.719e-05
ENSMUSG00000025261	Huwe1	HECT, UBA and WWE domain containing 1	-0.2171	8.93329	8.71616	8.798e-05
ENSMUSG00000037747	Phyhipl	phytanoyl-CoA hydroxylase interacting protein-like	0.299	7.37761	7.6766	8.853e-05
ENSMUSG00000031659	Adcy7	adenylate cyclase 7	0.9595	3.02434	3.98382	8.872e-05
ENSMUSG00000041688	Amot	angiomotin	-0.6155	5.07931	4.46382	8.949e-05
ENSMUSG00000004707	Ly9	lymphocyte antigen 9	1.49	1.21355	2.70401	8.999e-05
ENSMUSG00000070003	Ssbp4	single stranded DNA binding protein 4	0.3485	6.55976	6.90826	9.009e-05
ENSMUSG00000026786	Apbb1ip	amyloid beta precursor protein binding family B me...	0.8393	3.45077	4.29002	9.064e-05
ENSMUSG00000029371	Cxcl5	C-X-C motif chemokine ligand 5	1.555	1.15039	2.70564	9.087e-05
ENSMUSG00000002395	Use1	unconventional SNARE in the ER 1 homolog (S. cerev...	0.4183	5.78007	6.19839	9.087e-05
ENSMUSG00000025130	P4hb	prolyl 4-hydroxylase, beta polypeptide	0.2984	6.86319	7.16155	9.098e-05
ENSMUSG00000041329	Atp1b2	ATPase, Na+/K+ transporting, beta 2 polypeptide	0.4738	9.42484	9.89863	9.184e-05
ENSMUSG00000027995	Tlr2	toll-like receptor 2	1.289	1.80695	3.09641	9.19e-05
ENSMUSG00000074622	Mafb	MAF bZIP transcription factor B	0.6243	4.44479	5.06911	9.19e-05
ENSMUSG00000099041	Gm28035	predicted gene, 28035	0.3799	6.08916	6.4691	9.339e-05
ENSMUSG00000022218	Tgm1	transglutaminase 1, K polypeptide	1.781	0.88351	2.66401	9.372e-05
ENSMUSG00000027737	Slc7a11	solute carrier family 7 (cationic amino acid trans...	-0.5688	5.50154	4.93271	9.372e-05
ENSMUSG00000004798	Ulk2	unc-51 like kinase 2	-0.337	6.78475	6.44779	9.373e-05
ENSMUSG00000025409	Mbd6	methyl-CpG binding domain protein 6	0.3677	6.16668	6.53441	9.597e-05
ENSMUSG00000041870	Ankrd13a	ankyrin repeat domain 13a	0.4282	5.68723	6.11539	9.64e-05
ENSMUSG00000002102	Psmc3	proteasome (prosome, macropain) 26S subunit, ATPas...	0.2571	7.24738	7.50449	9.786e-05
ENSMUSG00000022957	Itsn1	intersectin 1 (SH3 domain protein 1A)	-0.2476	7.72466	7.47703	9.823e-05
ENSMUSG00000024109	Nrxn1	neurexin I	-0.2556	8.54707	8.2915	9.885e-05
ENSMUSG00000019986	Ahi1	Abelson helper integration site 1	-0.2584	8.02949	7.77106	9.9e-05
ENSMUSG00000040264	Gbp2b	guanylate binding protein 2b	1.097	2.42066	3.51722	0.0001008
ENSMUSG00000003452	Bicd1	BICD cargo adaptor 1	-0.5612	5.21292	4.65169	0.0001008
ENSMUSG00000019817	Plagl1	pleiomorphic adenoma gene-like 1	-0.7648	4.74046	3.97562	0.000101
ENSMUSG00000046314	Stxbp6	syntaxin binding protein 6 (amisyn)	-0.4437	6.54129	6.09764	0.000102
ENSMUSG00000047787	Flrt1	fibronectin leucine rich transmembrane protein 1	-0.7131	4.6593	3.9462	0.0001029
ENSMUSG00000040423	Rc3h1	RING CCCH (C3H) domains 1	-0.4894	5.6267	5.1373	0.0001031
ENSMUSG00000022231	Sema5a	sema domain, seven thrombospondin repeats (type 1 ...	-0.6055	6.91244	6.30698	0.0001032
ENSMUSG00000030894	Tpp1	tripeptidyl peptidase I	0.3304	6.49756	6.82799	0.0001041
ENSMUSG00000042743	Sgtb	small glutamine-rich tetratricopeptide repeat (TPR...	-0.3444	6.77955	6.43517	0.0001067
ENSMUSG00000020091	Eif4ebp2	eukaryotic translation initiation factor 4E bindin...	-0.7723	4.50221	3.7299	0.0001071
ENSMUSG00000041697	Cox6a1	cytochrome c oxidase subunit 6A1	0.3015	7.60685	7.90836	0.0001073
ENSMUSG00000032554	Trf	transferrin	0.7193	8.41004	9.12929	0.000109
ENSMUSG00000021134	Srsf5	serine and arginine-rich splicing factor 5	0.2831	8.3025	8.58561	0.0001093
ENSMUSG00000037754	Ppp1r16b	protein phosphatase 1, regulatory subunit 16B	-0.2577	7.55859	7.30091	0.0001101
ENSMUSG00000021986	Amer2	APC membrane recruitment 2	-0.7598	4.55133	3.79158	0.0001104
ENSMUSG00000028572	Hook1	hook microtubule tethering protein 1	-0.3863	6.43374	6.04746	0.0001104
ENSMUSG00000018920	Cxcl16	C-X-C motif chemokine ligand 16	1.301	1.87284	3.17414	0.0001114
ENSMUSG00000031954	Cfdp1	craniofacial development protein 1	0.3722	6.12184	6.49407	0.0001125
ENSMUSG00000043881	Kbtbd7	kelch repeat and BTB (POZ) domain containing 7	-0.5652	5.31175	4.74659	0.0001145
ENSMUSG00000015501	Hivep2	human immunodeficiency virus type I enhancer bindi...	-0.3324	8.41539	8.08298	0.0001147
ENSMUSG00000032216	Nedd4	neural precursor cell expressed, developmentally d...	-0.2114	9.01723	8.80585	0.0001147
ENSMUSG00000002658	Gtf2f1	general transcription factor IIF, polypeptide 1	0.3529	6.2794	6.63228	0.0001154
ENSMUSG00000005413	Hmox1	heme oxygenase 1	0.9515	3.07817	4.02964	0.0001159
ENSMUSG00000041560	Nop53	NOP53 ribosome biogenesis factor	0.3224	6.50148	6.82387	0.0001174
ENSMUSG00000061518	Cox5b	cytochrome c oxidase subunit 5B	0.4031	6.9895	7.39257	0.0001175
ENSMUSG00000022450	Ndufa6	NADH:ubiquinone oxidoreductase subunit A6	0.3937	6.02908	6.42279	0.0001175
ENSMUSG00000046204	Pnma2	paraneoplastic antigen MA2	-0.4236	6.14058	5.71697	0.000118
ENSMUSG00000051674	Dcun1d4	defective in cullin neddylation 1 domain containin...	-0.3386	6.71245	6.3739	0.000118
ENSMUSG00000016346	Kcnq2	potassium voltage-gated channel, subfamily Q, memb...	-0.284	9.3991	9.1151	0.0001183
ENSMUSG00000017390	Aldoc	aldolase C, fructose-bisphosphate	0.3376	9.76718	10.1048	0.000119
ENSMUSG00000052387	Trpm3	transient receptor potential cation channel, subfa...	-1.207	6.17917	4.97241	0.0001204
ENSMUSG00000060036	Rpl3	ribosomal protein L3	0.2504	8.43535	8.68577	0.000121
ENSMUSG00000030737	Slco2b1	solute carrier organic anion transporter family, m...	0.5845	4.61255	5.19706	0.0001216
ENSMUSG00000030283	St8sia1	ST8 alpha-N-acetyl-neuraminide alpha-2,8-sialyltra...	-0.4157	6.19476	5.77904	0.0001218
ENSMUSG00000027533	Fabp5	fatty acid binding protein 5, epidermal	0.3905	6.04143	6.43197	0.0001218
ENSMUSG00000028937	Acot7	acyl-CoA thioesterase 7	0.2867	7.95801	8.24474	0.0001232
ENSMUSG00000022185	Acin1	apoptotic chromatin condensation inducer 1	0.2367	7.64061	7.8773	0.0001232
ENSMUSG00000051111	Sv2c	synaptic vesicle glycoprotein 2c	-1.076	3.44681	2.3709	0.0001237
ENSMUSG00000026227	2810459M11Rik	RIKEN cDNA 2810459M11 gene	0.668	4.19592	4.8639	0.0001246
ENSMUSG00000024077	Strn	striatin, calmodulin binding protein	-0.3917	6.41488	6.02313	0.0001246
ENSMUSG00000015950	Ncf1	neutrophil cytosolic factor 1	0.8042	3.44316	4.24735	0.0001248
ENSMUSG00000070327	Rnf213	ring finger protein 213	0.6915	4.43534	5.12686	0.0001249
ENSMUSG00000029062	Cdk11b	cyclin dependent kinase 11B	0.3261	6.50938	6.83545	0.0001251
ENSMUSG00000042312	S100a13	S100 calcium binding protein A13	0.7278	3.88418	4.61197	0.0001256
ENSMUSG00000023010	Tmbim6	transmembrane BAX inhibitor motif containing 6	0.2547	8.53656	8.79129	0.0001262
ENSMUSG00000000787	Ddx3x	DEAD box helicase 3, X-linked	-0.3206	7.99713	7.67652	0.0001283
ENSMUSG00000026288	Inpp5d	inositol polyphosphate-5-phosphatase D	0.6356	4.25958	4.89517	0.0001314
ENSMUSG00000042473	Tbc1d8b	TBC1 domain family, member 8B	-0.8345	4.04543	3.21098	0.0001321
ENSMUSG00000013523	Bcas1	brain enriched myelin associated protein 1	0.8574	7.78983	8.64725	0.0001331
ENSMUSG00000061740	Cyp2d22	cytochrome P450, family 2, subfamily d, polypeptid...	0.4456	5.4645	5.91009	0.0001331
ENSMUSG00000022452	Smdt1	single-pass membrane protein with aspartate rich t...	0.4221	5.73656	6.15868	0.0001331
ENSMUSG00000019173	Rab5c	RAB5C, member RAS oncogene family	0.2633	7.12801	7.39129	0.0001358
ENSMUSG00000029020	Mfn2	mitofusin 2	-0.2188	8.0608	7.84201	0.0001362
ENSMUSG00000005575	Ube2m	ubiquitin-conjugating enzyme E2M	0.2856	6.94179	7.22742	0.0001389
ENSMUSG00000031278	Acsl4	acyl-CoA synthetase long-chain family member 4	-0.3906	6.40463	6.01399	0.0001411
ENSMUSG00000074785	Plxnc1	plexin C1	-0.4438	6.01849	5.57468	0.0001418
ENSMUSG00000037386	Rims2	regulating synaptic membrane exocytosis 2	-0.4474	5.9672	5.51981	0.0001431
ENSMUSG00000036748	Cuedc2	CUE domain containing 2	0.3239	6.48507	6.80894	0.0001431
ENSMUSG00000003974	Grm3	glutamate receptor, metabotropic 3	-0.5015	5.55992	5.05841	0.0001438
ENSMUSG00000038170	Pde4dip	phosphodiesterase 4D interacting protein (myomegal...	-0.2204	8.033	7.81258	0.0001438
ENSMUSG00000046532	Ar	androgen receptor	-0.5763	5.23827	4.66198	0.0001439
ENSMUSG00000004677	Myo9b	myosin IXb	0.3378	6.40108	6.73884	0.0001439
ENSMUSG00000049313	Sorl1	sortilin-related receptor, LDLR class A repeats-co...	-0.3015	8.69584	8.39431	0.0001463
ENSMUSG00000024378	Stard4	StAR related lipid transfer domain containing 4	-0.7256	4.57146	3.84586	0.0001465
ENSMUSG00000026664	Phyh	phytanoyl-CoA hydroxylase	0.3589	6.20606	6.56495	0.000147
ENSMUSG00000057113	Npm1	nucleophosmin 1	0.2809	7.03895	7.3198	0.0001474
ENSMUSG00000051853	Arf3	ADP-ribosylation factor 3	-0.2558	10.4882	10.2325	0.000148
ENSMUSG00000034855	Cxcl10	C-X-C motif chemokine ligand 10	1.741	1.14337	2.88393	0.0001488
ENSMUSG00000033916	Chmp2a	charged multivesicular body protein 2A	0.3829	6.01761	6.40046	0.0001493
ENSMUSG00000061046	Haghl	hydroxyacylglutathione hydrolase-like	0.3547	6.32642	6.6811	0.0001495
ENSMUSG00000030560	Ctsc	cathepsin C	0.7478	3.81264	4.56042	0.0001499
ENSMUSG00000027009	Itga4	integrin alpha 4	-0.6112	5.06944	4.45828	0.0001502
ENSMUSG00000029361	Nos1	nitric oxide synthase 1, neuronal	-0.5156	7.13743	6.62178	0.0001518
ENSMUSG00000002015	Bcap31	B cell receptor associated protein 31	0.4249	5.62839	6.05331	0.0001524
ENSMUSG00000026640	Plxna2	plexin A2	-0.3332	7.23454	6.90131	0.0001539
ENSMUSG00000074305	Peak1	pseudopodium-enriched atypical kinase 1	-0.3843	6.68097	6.29667	0.0001576
ENSMUSG00000035885	Cox8a	cytochrome c oxidase subunit 8A	0.326	7.88685	8.21285	0.0001578
ENSMUSG00000040797	Iqsec3	IQ motif and Sec7 domain 3	-0.271	8.2352	7.96423	0.0001618
ENSMUSG00000062203	Gspt1	G1 to S phase transition 1	-0.3938	6.27806	5.88424	0.0001621
ENSMUSG00000019362	D8Ertd738e	DNA segment, Chr 8, ERATO Doi 738, expressed	0.4521	5.43582	5.88788	0.0001624
ENSMUSG00000035674	Ndufa3	NADH:ubiquinone oxidoreductase subunit A3	0.3919	5.94299	6.33484	0.0001624
ENSMUSG00000026883	Dab2ip	disabled 2 interacting protein	-0.2995	7.06701	6.76755	0.0001632
ENSMUSG00000022890	Atp5pf	ATP synthase peripheral stalk subunit F6	0.3005	6.85537	7.15584	0.0001637
ENSMUSG00000089837	Npcd	neuronal pentraxin chromo domain	-0.6939	8.02552	7.33166	0.0001641
ENSMUSG00000062591	Tubb4a	tubulin, beta 4A class IVA	0.3727	9.66018	10.0329	0.0001664
ENSMUSG00000014776	Nol3	nucleolar protein 3 (apoptosis repressor with CARD...	0.5452	4.7739	5.31907	0.0001665
ENSMUSG00000041203	Trir	telomerase RNA component interacting RNase	0.4519	5.46123	5.91309	0.0001665
ENSMUSG00000022623	Shank3	SH3 and multiple ankyrin repeat domains 3	-0.3011	8.25599	7.95485	0.0001668
ENSMUSG00000026104	Stat1	signal transducer and activator of transcription 1	0.6594	4.96909	5.62852	0.0001669
ENSMUSG00000018800	Abca5	ATP-binding cassette, sub-family A member 5	-0.4485	5.81804	5.36949	0.0001677
ENSMUSG00000057715	A830018L16Rik	RIKEN cDNA A830018L16 gene	-0.4359	6.19379	5.75793	0.0001681
ENSMUSG00000056493	Foxk1	forkhead box K1	-0.3874	6.7724	6.38503	0.0001682
ENSMUSG00000055485	Mtcl2	microtubule crosslinking factor 2	-0.5838	5.2122	4.62843	0.0001686
ENSMUSG00000054008	Ndst1	N-deacetylase/N-sulfotransferase (heparan glucosam...	-0.3439	6.98259	6.63871	0.0001687
ENSMUSG00000027993	Trim2	tripartite motif-containing 2	-0.3242	8.69603	8.3718	0.0001695
ENSMUSG00000053113	Socs3	suppressor of cytokine signaling 3	1.238	1.98519	3.22303	0.0001709
ENSMUSG00000020143	Dock2	dedicator of cyto-kinesis 2	0.9013	3.02089	3.92214	0.0001709
ENSMUSG00000022197	Pdzd2	PDZ domain containing 2	-0.4299	6.20287	5.77295	0.0001712
ENSMUSG00000079293	Clec7a	C-type lectin domain family 7, member a	1.682	0.95768	2.63978	0.0001723
ENSMUSG00000032293	Ireb2	iron responsive element binding protein 2	-0.412	6.03122	5.61921	0.0001723
ENSMUSG00000028552	Eps15	epidermal growth factor receptor pathway substrate...	-0.2254	8.06167	7.8363	0.0001727
ENSMUSG00000009569	Mrtfb	myocardin related transcription factor B	-0.3726	8.2822	7.90956	0.0001739
ENSMUSG00000057230	Aak1	AP2 associated kinase 1	-0.2881	8.95622	8.66809	0.0001764
ENSMUSG00000038502	Ptov1	prostate tumor over expressed gene 1	0.2647	7.07488	7.33954	0.0001765
ENSMUSG00000020436	Gabrg2	gamma-aminobutyric acid type A receptor, subunit g...	-0.281	7.28788	7.00686	0.0001793
ENSMUSG00000010376	Nedd8	neural precursor cell expressed, developmentally d...	0.3682	6.14039	6.50863	0.0001819
ENSMUSG00000040483	Xaf1	XIAP associated factor 1	0.9228	2.85747	3.78022	0.0001845
ENSMUSG00000013160	Atp6v0d1	ATPase, H+ transporting, lysosomal V0 subunit D1	0.2154	7.70169	7.91708	0.0001863
ENSMUSG00000031328	Flna	filamin, alpha	0.3014	6.92447	7.22584	0.0001875
ENSMUSG00000022788	Fgd4	FYVE, RhoGEF and PH domain containing 4	-0.5331	5.35304	4.81995	0.000188
ENSMUSG00000002325	Irf9	interferon regulatory factor 9	0.6533	4.16814	4.82141	0.0001909
ENSMUSG00000062151	Unc13c	unc-13 homolog C	-1.442	4.82902	3.38739	0.0001914
ENSMUSG00000068205	Macrod2	mono-ADP ribosylhydrolase 2	-0.4782	5.65868	5.18049	0.0001931
ENSMUSG00000019841	Rev3l	REV3 like, DNA directed polymerase zeta catalytic ...	-0.4317	5.93453	5.50282	0.0001941
ENSMUSG00000024038	Ndufv3	NADH:ubiquinone oxidoreductase core subunit V3	0.3821	5.94595	6.32808	0.0001965
ENSMUSG00000055817	Mta3	metastasis associated 3	-0.351	6.52117	6.17018	0.0001967
ENSMUSG00000036634	Mag	myelin-associated glycoprotein	0.6344	7.51572	8.15017	0.0001969
ENSMUSG00000052310	Slc39a1	solute carrier family 39 (zinc transporter), membe...	0.4545	5.31855	5.77304	0.0001981
ENSMUSG00000021488	Nsd1	nuclear receptor-binding SET-domain protein 1	-0.2378	7.63395	7.39615	0.0001981
ENSMUSG00000020708	Psmc5	protease (prosome, macropain) 26S subunit, ATPase ...	0.2931	7.14282	7.43595	0.0001996
ENSMUSG00000024639	Gnaq	guanine nucleotide binding protein, alpha q polype...	-0.3493	8.04871	7.69945	0.0002008
ENSMUSG00000029167	Ppargc1a	peroxisome proliferative activated receptor, gamma...	-0.4631	5.70199	5.2389	0.0002029
ENSMUSG00000045672	Col27a1	collagen, type XXVII, alpha 1	0.7417	3.68855	4.43029	0.0002031
ENSMUSG00000024063	Lbh	limb-bud and heart	0.4079	5.78431	6.19218	0.0002038
ENSMUSG00000022548	Apod	apolipoprotein D	0.8152	7.53448	8.3497	0.0002049
ENSMUSG00000026159	Agfg1	ArfGAP with FG repeats 1	-0.348	6.54974	6.20171	0.0002072
ENSMUSG00000048304	Slitrk3	SLIT and NTRK-like family, member 3	-0.361	6.5862	6.22518	0.0002077
ENSMUSG00000075702	Selenom	selenoprotein M	0.3713	6.18316	6.5545	0.0002085
ENSMUSG00000054280	Prr14l	proline rich 14-like	-0.3653	6.51988	6.15456	0.0002085
ENSMUSG00000028194	Ddah1	dimethylarginine dimethylaminohydrolase 1	0.3164	6.67536	6.9918	0.0002097
ENSMUSG00000015839	Nfe2l2	nuclear factor, erythroid derived 2, like 2	0.5764	4.54647	5.12291	0.0002118
ENSMUSG00000019254	Ppp1r12c	protein phosphatase 1, regulatory subunit 12C	0.2815	6.84997	7.13151	0.0002167
ENSMUSG00000075376	Rc3h2	ring finger and CCCH-type zinc finger domains 2	-0.3931	6.14623	5.75313	0.0002193
ENSMUSG00000025498	Irf7	interferon regulatory factor 7	1.169	2.062	3.23143	0.0002197
ENSMUSG00000026585	Kifap3	kinesin-associated protein 3	-0.2096	8.04668	7.83706	0.0002208
ENSMUSG00000002341	Ncan	neurocan	-0.2594	7.94734	7.68791	0.000221
ENSMUSG00000035686	Thrsp	thyroid hormone responsive	0.5297	4.93656	5.4663	0.0002217
ENSMUSG00000033335	Dnm2	dynamin 2	0.3348	6.29292	6.62776	0.0002217
ENSMUSG00000090247	Bloc1s1	biogenesis of lysosomal organelles complex-1, subu...	0.4809	5.1689	5.64984	0.0002229
ENSMUSG00000053025	Sv2b	synaptic vesicle glycoprotein 2b	-0.4561	8.79979	8.34372	0.0002235
ENSMUSG00000030603	Psmc4	proteasome (prosome, macropain) 26S subunit, ATPas...	0.3268	6.40463	6.73147	0.0002235
ENSMUSG00000025777	Gdap1	ganglioside-induced differentiation-associated-pro...	-0.3167	6.80279	6.48611	0.0002256
ENSMUSG00000031333	Abcb7	ATP-binding cassette, sub-family B member 7	-0.517	5.36344	4.84644	0.0002265
ENSMUSG00000029919	Hpgds	hematopoietic prostaglandin D synthase	0.8124	3.32436	4.13673	0.0002274
ENSMUSG00000040125	Gpr26	G protein-coupled receptor 26	-0.4066	7.59202	7.18543	0.0002296
ENSMUSG00000038473	Nos1ap	nitric oxide synthase 1 (neuronal) adaptor protein	-0.4475	6.72005	6.27252	0.0002307
ENSMUSG00000015806	Qdpr	quinoid dihydropteridine reductase	0.568	7.40901	7.977	0.0002322
ENSMUSG00000021750	Fam107a	family with sequence similarity 107, member A	0.3518	8.76164	9.11341	0.0002358
ENSMUSG00000000794	Kcnn3	potassium intermediate/small conductance calcium-a...	-0.7581	4.30873	3.55058	0.0002404
ENSMUSG00000020267	Hint1	histidine triad nucleotide binding protein 1	0.309	6.65459	6.96357	0.0002404
ENSMUSG00000058420	Syt17	synaptotagmin XVII	-0.6794	5.65729	4.97792	0.0002405
ENSMUSG00000041530	Ago1	argonaute RISC catalytic subunit 1	-0.3026	6.9179	6.61529	0.000241
ENSMUSG00000031558	Slit2	slit guidance ligand 2	-0.5658	5.60273	5.03689	0.0002429
ENSMUSG00000050335	Lgals3	lectin, galactose binding, soluble 3	1.334	1.60394	2.93769	0.0002461
ENSMUSG00000027966	Col11a1	collagen, type XI, alpha 1	0.7231	4.50199	5.22511	0.0002471
ENSMUSG00000026249	Serpine2	serine (or cysteine) peptidase inhibitor, clade E,...	0.4531	7.50555	7.95861	0.0002478
ENSMUSG00000019978	Epb41l2	erythrocyte membrane protein band 4.1 like 2	0.3248	6.4295	6.7543	0.0002497
ENSMUSG00000032249	Anp32a	acidic nuclear phosphoprotein 32 family member A	0.219	7.67468	7.89372	0.0002497
ENSMUSG00000046699	Slitrk4	SLIT and NTRK-like family, member 4	-0.5984	5.08406	4.48571	0.0002515
ENSMUSG00000037625	Cldn11	claudin 11	0.5729	6.93577	7.50864	0.0002533
ENSMUSG00000005625	Psmd4	proteasome (prosome, macropain) 26S subunit, non-A...	0.3053	6.57621	6.88148	0.0002539
ENSMUSG00000070498	Tmem132b	transmembrane protein 132B	-0.2726	7.48731	7.21476	0.0002539
ENSMUSG00000025408	Ddit3	DNA-damage inducible transcript 3	0.5929	4.43013	5.02305	0.0002552
ENSMUSG00000031696	Vps35	VPS35 retromer complex component	-0.2757	7.18735	6.91162	0.0002553
ENSMUSG00000070493	Chchd2	coiled-coil-helix-coiled-coil-helix domain contain...	0.3187	6.67968	6.9984	0.0002561
ENSMUSG00000029559	2210016L21Rik	RIKEN cDNA 2210016L21 gene	0.2841	6.83044	7.11455	0.0002575
ENSMUSG00000031565	Fgfr1	fibroblast growth factor receptor 1	0.3661	7.17438	7.54051	0.0002613
ENSMUSG00000036760	Kcnk9	potassium channel, subfamily K, member 9	-0.9592	3.6743	2.71511	0.0002614
ENSMUSG00000070509	Rgma	repulsive guidance molecule family member A	0.3716	6.05776	6.42935	0.0002621
ENSMUSG00000035954	Dock4	dedicator of cytokinesis 4	-0.5422	7.94357	7.40136	0.0002625
ENSMUSG00000020271	Fbxw11	F-box and WD-40 domain protein 11	-0.2974	7.23401	6.93663	0.0002625
ENSMUSG00000000826	Dnajc5	DnaJ heat shock protein family (Hsp40) member C5	-0.1727	8.58689	8.4142	0.0002632
ENSMUSG00000029068	Ccnl2	cyclin L2	0.2786	6.90767	7.18631	0.0002635
ENSMUSG00000029223	Uchl1	ubiquitin carboxy-terminal hydrolase L1	0.3088	8.83252	9.1413	0.0002647
ENSMUSG00000040613	Apobec1	apolipoprotein B mRNA editing enzyme, catalytic po...	1.116	2.07501	3.19096	0.0002659
ENSMUSG00000056124	B4galt6	UDP-Gal:betaGlcNAc beta 1,4-galactosyltransferase,...	-0.2546	7.45309	7.19849	0.0002659
ENSMUSG00000010803	Gabra1	gamma-aminobutyric acid type A receptor subunit al...	-0.3878	8.01618	7.62838	0.0002664
ENSMUSG00000059552	Trp53	transformation related protein 53	0.5065	4.9107	5.41716	0.0002669
ENSMUSG00000039680	Mrps6	mitochondrial ribosomal protein S6	0.5864	4.47355	5.05999	0.0002677
ENSMUSG00000019828	Grm1	glutamate receptor, metabotropic 1	-0.4439	5.9933	5.54937	0.0002697
ENSMUSG00000020917	Acly	ATP citrate lyase	-0.2646	7.33918	7.07459	0.0002706
ENSMUSG00000049630	C1ql3	C1q-like 3	-0.6737	6.36496	5.69123	0.0002717
ENSMUSG00000020163	Uqcr11	ubiquinol-cytochrome c reductase, complex III subu...	0.3363	6.32434	6.66063	0.0002722
ENSMUSG00000057193	Slc44a2	solute carrier family 44, member 2	0.3961	5.66521	6.06135	0.0002728
ENSMUSG00000022263	Trio	triple functional domain (PTPRF interacting)	-0.235	7.93212	7.69716	0.0002728
ENSMUSG00000046432	Bex3	brain expressed X-linked 3	0.2669	7.18672	7.4536	0.0002743
ENSMUSG00000042350	Arel1	apoptosis resistant E3 ubiquitin protein ligase 1	-0.2902	7.31276	7.02252	0.0002761
ENSMUSG00000023809	Rps6ka2	ribosomal protein S6 kinase, polypeptide 2	-0.4262	5.96312	5.53692	0.0002765
ENSMUSG00000041720	Pi4ka	phosphatidylinositol 4-kinase alpha	-0.1783	8.47118	8.29283	0.0002827
ENSMUSG00000031703	Itfg1	integrin alpha FG-GAP repeat containing 1	-0.2381	7.64943	7.41133	0.0002837
ENSMUSG00000030525	Chrna7	cholinergic receptor, nicotinic, alpha polypeptide...	-0.7875	4.37801	3.59051	0.0002846
ENSMUSG00000021662	Arhgef28	Rho guanine nucleotide exchange factor 28	-0.4731	6.268	5.79489	0.0002847
ENSMUSG00000003437	Paf1	Paf1, RNA polymerase II complex component	0.3369	6.20112	6.53806	0.0002854
ENSMUSG00000018547	Pip4k2b	phosphatidylinositol-5-phosphate 4-kinase, type II...	-0.2487	7.54036	7.29169	0.0002863
ENSMUSG00000030795	Fus	fused in sarcoma	0.2037	8.25669	8.46034	0.0002867
ENSMUSG00000023175	Bsg	basigin	0.3232	8.58665	8.90985	0.0002881
ENSMUSG00000030257	Srgap3	SLIT-ROBO Rho GTPase activating protein 3	-0.3118	8.969	8.65721	0.0002889
ENSMUSG00000026509	Capn2	calpain 2	0.3276	6.41386	6.74141	0.0002892
ENSMUSG00000040463	Mybbp1a	MYB binding protein (P160) 1a	0.3436	6.15717	6.50078	0.0002898
ENSMUSG00000024387	Csnk2b	casein kinase 2, beta polypeptide	0.3401	6.23477	6.57486	0.0002905
ENSMUSG00000000088	Cox5a	cytochrome c oxidase subunit 5A	0.3797	6.30291	6.68257	0.000295
ENSMUSG00000047495	Dlgap2	DLG associated protein 2	-0.543	5.98048	5.43751	0.0002952
ENSMUSG00000032316	Clk3	CDC-like kinase 3	0.3797	5.84524	6.22493	0.0002962
ENSMUSG00000003380	Rabac1	Rab acceptor 1 (prenylated)	0.3203	6.46987	6.79022	0.0002963
ENSMUSG00000001323	Srr	serine racemase	-0.3274	6.76719	6.43977	0.0002979
ENSMUSG00000000538	Tom1l2	target of myb1-like 2 (chicken)	-0.1802	8.38288	8.20272	0.0003034
ENSMUSG00000030605	Mfge8	milk fat globule EGF and factor V/VIII domain cont...	-0.4307	7.48001	7.04928	0.000304
ENSMUSG00000001995	Sipa1l2	signal-induced proliferation-associated 1 like 2	-0.3657	6.4997	6.13402	0.0003092
ENSMUSG00000047013	Fbxo41	F-box protein 41	-0.2843	7.29324	7.00889	0.0003124
ENSMUSG00000062901	Klhl24	kelch-like 24	-0.3775	6.2382	5.86075	0.0003152
ENSMUSG00000040524	Zfp609	zinc finger protein 609	-0.3759	6.26135	5.88542	0.0003165
ENSMUSG00000042682	Selenok	selenoprotein K	0.3459	6.18525	6.53116	0.0003181
ENSMUSG00000027797	Dclk1	doublecortin-like kinase 1	-0.2732	9.44197	9.16878	0.0003189
ENSMUSG00000024767	Otub1	OTU domain, ubiquitin aldehyde binding 1	0.2063	7.75792	7.96425	0.0003203
ENSMUSG00000041309	Nkx6-2	NK6 homeobox 2	0.7935	3.40365	4.19713	0.0003216
ENSMUSG00000031709	Tbc1d9	TBC1 domain family, member 9	-0.3476	7.05538	6.70782	0.0003228
ENSMUSG00000019820	Utrn	utrophin	-0.4481	5.83606	5.38797	0.000326
ENSMUSG00000036948	Trappc14	trafficking protein particle complex 14	0.3434	6.12888	6.47232	0.000326
ENSMUSG00000068740	Celsr2	cadherin, EGF LAG seven-pass G-type receptor 2	-0.2584	8.45248	8.19404	0.0003307
ENSMUSG00000024665	Fads2	fatty acid desaturase 2	-0.3235	7.03686	6.71336	0.0003311
ENSMUSG00000027660	Skil	SKI-like	-0.4028	6.22537	5.82257	0.0003319
ENSMUSG00000015947	Fcgr1	Fc receptor, IgG, high affinity I	1.046	2.35312	3.39876	0.0003322
ENSMUSG00000029651	Mtus2	microtubule associated tumor suppressor candidate ...	-0.4398	5.83747	5.39762	0.0003322
ENSMUSG00000030577	Cd22	CD22 antigen	1.428	1.13935	2.5672	0.0003324
ENSMUSG00000031749	St3gal2	ST3 beta-galactoside alpha-2,3-sialyltransferase 2	-0.2952	7.04931	6.75408	0.0003324
ENSMUSG00000041571	Selenow	selenoprotein W	0.2942	9.03439	9.32856	0.0003341
ENSMUSG00000020733	Nherf1	NHERF family PDZ scaffold protein 1	0.3801	5.79252	6.17266	0.0003343
ENSMUSG00000030435	U2af2	U2 small nuclear ribonucleoprotein auxiliary facto...	0.2483	7.11688	7.36518	0.00034
ENSMUSG00000030805	Stx4a	syntaxin 4A (placental)	0.4342	5.46218	5.89635	0.0003455
ENSMUSG00000029621	Arpc1a	actin related protein 2/3 complex, subunit 1A	0.2232	7.46905	7.69228	0.0003483
ENSMUSG00000030276	Ttll3	tubulin tyrosine ligase-like family, member 3	0.3739	5.84719	6.2211	0.0003511
ENSMUSG00000029470	P2rx4	purinergic receptor P2X, ligand-gated ion channel ...	0.6728	3.94018	4.61295	0.0003535
ENSMUSG00000031838	Ifi30	interferon gamma inducible protein 30	0.9935	2.45797	3.45149	0.0003576
ENSMUSG00000040265	Dnm3	dynamin 3	-0.3723	7.06301	6.69067	0.0003621
ENSMUSG00000030016	Zfp638	zinc finger protein 638	-0.2995	6.84039	6.54086	0.0003646
ENSMUSG00000093456	Gm20662	predicted gene 20662	-0.4208	5.9342	5.51337	0.0003651
ENSMUSG00000074968	Ano3	anoctamin 3	-0.4865	6.97109	6.48458	0.0003664
ENSMUSG00000047879	Usp14	ubiquitin specific peptidase 14	-0.3225	6.69693	6.37439	0.0003716
ENSMUSG00000029772	Ahcyl2	S-adenosylhomocysteine hydrolase-like 2	-0.3365	8.07431	7.7378	0.0003795
ENSMUSG00000013033	Adgrl1	adhesion G protein-coupled receptor L1	-0.1466	9.32087	9.17432	0.0003815
ENSMUSG00000022912	Pros1	protein S (alpha)	0.647	4.08421	4.7312	0.0003832
ENSMUSG00000030201	Lrp6	low density lipoprotein receptor-related protein 6	-0.3961	6.05393	5.65782	0.0003843
ENSMUSG00000025949	Pikfyve	phosphoinositide kinase, FYVE type zinc finger con...	-0.4129	5.92772	5.51478	0.0003852
ENSMUSG00000036943	Rab8b	RAB8B, member RAS oncogene family	-0.4308	5.89995	5.46916	0.0003853
ENSMUSG00000020282	Rhbdf1	rhomboid 5 homolog 1	0.5995	4.34695	4.94648	0.0003956
ENSMUSG00000020716	Nf1	neurofibromin 1	-0.2728	7.14953	6.87674	0.0003961
ENSMUSG00000036792	Mbd5	methyl-CpG binding domain protein 5	-0.3765	6.24001	5.86347	0.000398
ENSMUSG00000038695	Josd2	Josephin domain containing 2	0.3723	5.97864	6.35091	0.0003982
ENSMUSG00000090112	Shprh	SNF2 histone linker PHD RING helicase	-0.4222	5.80831	5.38611	0.0004
ENSMUSG00000054263	Lifr	LIF receptor alpha	-0.4108	5.94844	5.53761	0.0004001
ENSMUSG00000020069	Hnrnph3	heterogeneous nuclear ribonucleoprotein H3	0.377	5.82627	6.20326	0.0004001
ENSMUSG00000005373	Mlxipl	MLX interacting protein-like	0.9484	2.83731	3.78568	0.0004054
ENSMUSG00000004846	Plod3	procollagen-lysine, 2-oxoglutarate 5-dioxygenase 3	0.4355	5.2675	5.70296	0.0004061
ENSMUSG00000059323	Tonsl	tonsoku-like, DNA repair protein	0.3255	6.37323	6.69871	0.0004061
ENSMUSG00000034648	Lrrn1	leucine rich repeat protein 1, neuronal	-0.3232	6.61415	6.29094	0.0004079
ENSMUSG00000022312	Eif3h	eukaryotic translation initiation factor 3, subuni...	0.2781	6.7962	7.07431	0.0004117
ENSMUSG00000014592	Camta1	calmodulin binding transcription activator 1	-0.22	8.54444	8.32441	0.000415
ENSMUSG00000038776	Ephx1	epoxide hydrolase 1, microsomal	0.4944	5.18375	5.67819	0.0004155
ENSMUSG00000039840	Epg5	ectopic P-granules 5 autophagy tethering factor	-0.4023	5.98985	5.58757	0.0004181
ENSMUSG00000059534	Uqcr10	ubiquinol-cytochrome c reductase, complex III subu...	0.3463	6.07278	6.41912	0.0004181
ENSMUSG00000033014	Trim33	tripartite motif-containing 33	-0.3697	6.2154	5.84572	0.0004197
ENSMUSG00000050600	Zfp831	zinc finger protein 831	-0.5845	5.63591	5.05139	0.0004203
ENSMUSG00000029287	Tgfbr3	transforming growth factor, beta receptor III	-0.6352	4.65724	4.02204	0.0004205
ENSMUSG00000026163	Sphkap	SPHK1 interactor, AKAP domain containing	-0.4744	8.16093	7.68651	0.0004205
ENSMUSG00000025026	Add3	adducin 3	0.2939	7.47205	7.76598	0.0004211
ENSMUSG00000018102	H2bc4	H2B clustered histone 4	0.531	4.69855	5.22951	0.0004251
ENSMUSG00000031610	Scrg1	scrapie responsive gene 1	0.5513	4.57047	5.12179	0.0004264
ENSMUSG00000015243	Abca1	ATP-binding cassette, sub-family A member 1	0.5055	5.71829	6.22376	0.0004304
ENSMUSG00000006299	Aamp	angio-associated migratory protein	0.2424	7.1861	7.42849	0.0004338
ENSMUSG00000071054	Safb	scaffold attachment factor B	0.2358	7.30921	7.54501	0.0004338
ENSMUSG00000030172	Erc1	ELKS/RAB6-interacting/CAST family member 1	-0.3764	6.28342	5.90707	0.0004369
ENSMUSG00000020848	Doc2b	double C2, beta	-0.5078	6.95928	6.45144	0.0004374
ENSMUSG00000049658	Bdp1	B double prime 1, subunit of RNA polymerase III tr...	-0.4796	5.43388	4.95424	0.0004379
ENSMUSG00000033436	Armcx2	armadillo repeat containing, X-linked 2	-0.3057	6.7949	6.48924	0.0004379
ENSMUSG00000072568	Lratd2	LRAT domain containing 1	-0.6332	4.65389	4.02064	0.0004424
ENSMUSG00000075415	Fnbp1	formin binding protein 1	0.271	7.73259	8.0036	0.0004468
ENSMUSG00000020135	Apc2	APC regulator of WNT signaling pathway 2	-0.2373	7.61433	7.37707	0.0004505
ENSMUSG00000031633	Slc25a4	solute carrier family 25 (mitochondrial carrier, a...	0.2412	8.99854	9.23973	0.0004534
ENSMUSG00000001418	Glmp	glycosylated lysosomal membrane protein	0.4366	5.31267	5.74925	0.0004549
ENSMUSG00000022361	Zhx1	zinc fingers and homeoboxes 1	-0.3344	6.58367	6.24926	0.0004576
ENSMUSG00000087370	Tmem170b	transmembrane protein 170B	-0.3308	6.52608	6.19527	0.0004577
ENSMUSG00000075270	Pde11a	phosphodiesterase 11A	-0.8934	3.75878	2.86534	0.000463
ENSMUSG00000024479	Mal2	mal, T cell differentiation protein 2	-0.3503	7.37032	7.02007	0.000471
ENSMUSG00000040760	Appl1	adaptor protein, phosphotyrosine interaction, PH d...	-0.3093	6.6849	6.37561	0.0004754
ENSMUSG00000093904	Tomm20	translocase of outer mitochondrial membrane 20	-0.1895	8.19938	8.00984	0.0004754
ENSMUSG00000047037	Nipa1	non imprinted in Prader-Willi/Angelman syndrome 1 ...	-0.4311	5.77672	5.34567	0.0004789
ENSMUSG00000028927	Padi2	peptidyl arginine deiminase, type II	0.5832	5.87716	6.46031	0.0004827
ENSMUSG00000001018	Snapin	SNAP-associated protein	0.3917	5.67287	6.06461	0.0004829
ENSMUSG00000051550	Zfp579	zinc finger protein 579	0.5427	4.56103	5.10369	0.000483
ENSMUSG00000029202	Pds5a	PDS5 cohesin associated factor A	-0.4674	5.56934	5.10191	0.000483
ENSMUSG00000031731	Ap1g1	adaptor protein complex AP-1, gamma 1 subunit	-0.2843	6.93263	6.6483	0.0004832
ENSMUSG00000034488	Edil3	EGF-like repeats and discoidin I-like domains 3	-0.3228	6.71705	6.39426	0.0004894
ENSMUSG00000030029	Lrig1	leucine-rich repeats and immunoglobulin-like domai...	0.502	5.24797	5.74994	0.0004964
ENSMUSG00000037321	Tap1	transporter 1, ATP-binding cassette, sub-family B ...	0.8608	2.83239	3.69323	0.0004971
ENSMUSG00000063455	D630045J12Rik	RIKEN cDNA D630045J12 gene	-0.3642	6.37763	6.01348	0.0004971
ENSMUSG00000050856	Atp5me	ATP synthase membrane subunit e	0.3519	6.07696	6.42883	0.0005002
ENSMUSG00000024411	Aqp4	aquaporin 4	0.5405	7.22161	7.76213	0.0005012
ENSMUSG00000025651	Uqcrc1	ubiquinol-cytochrome c reductase core protein 1	0.2181	7.6581	7.87619	0.0005075
ENSMUSG00000078716	Tmem8b	transmembrane protein 8B	-0.3092	6.96222	6.653	0.0005091
ENSMUSG00000049100	Pcdh10	protocadherin 10	-0.3074	6.79589	6.48846	0.0005091
ENSMUSG00000054423	Cadps	Ca2+-dependent secretion activator	-0.2832	8.12061	7.83739	0.0005106
ENSMUSG00000089945	Pakap	paralemmin A kinase anchor protein	-0.3196	6.78702	6.46746	0.0005118
ENSMUSG00000005802	Slc30a4	solute carrier family 30 (zinc transporter), membe...	-0.4282	5.75145	5.32327	0.0005128
ENSMUSG00000021313	Ryr2	ryanodine receptor 2, cardiac	-0.3874	8.34063	7.95326	0.0005142
ENSMUSG00000098112	Bin2	bridging integrator 2	0.7725	3.29328	4.06582	0.0005159
ENSMUSG00000020668	Kif3c	kinesin family member 3C	-0.1964	8.07167	7.87525	0.0005159
ENSMUSG00000063895	Nup58	nucleoporin 58	-0.5121	5.29199	4.77989	0.0005218
ENSMUSG00000051048	P4ha3	procollagen-proline, 2-oxoglutarate 4-dioxygenase ...	1.02	2.32817	3.34811	0.0005226
ENSMUSG00000039105	Atp6v1g1	ATPase, H+ transporting, lysosomal V1 subunit G1	0.3648	5.8523	6.21705	0.0005322
ENSMUSG00000030313	Dennd5b	DENN domain containing 5B	-0.3662	6.32765	5.9615	0.0005326
ENSMUSG00000040640	Erc2	ELKS/RAB6-interacting/CAST family member 2	-0.4673	7.53383	7.06654	0.0005331
ENSMUSG00000034616	Ssh3	slingshot protein phosphatase 3	0.3701	5.81766	6.18775	0.0005347
ENSMUSG00000028670	Lypla2	lysophospholipase 2	0.3142	6.31094	6.62512	0.0005347
ENSMUSG00000022883	Robo1	roundabout guidance receptor 1	-0.4597	5.90193	5.4422	0.0005367
ENSMUSG00000029119	Man2b2	mannosidase 2, alpha B2	0.4183	5.44591	5.86426	0.0005394
ENSMUSG00000021288	Klc1	kinesin light chain 1	0.1832	9.26294	9.44617	0.0005395
ENSMUSG00000034780	B3galt1	UDP-Gal:betaGlcNAc beta 1,3-galactosyltransferase,...	-0.4825	5.43782	4.95528	0.0005524
ENSMUSG00000051695	Pcbp1	poly(rC) binding protein 1	0.2407	7.17928	7.42002	0.0005561
ENSMUSG00000008090	Fgfrl1	fibroblast growth factor receptor-like 1	0.5699	4.45738	5.02729	0.0005583
ENSMUSG00000028656	Cap1	cyclase associated actin cytoskeleton regulatory p...	0.2186	8.10781	8.32646	0.0005592
ENSMUSG00000023032	Slc4a8	solute carrier family 4 (anion exchanger), member ...	-0.2666	7.17953	6.91296	0.0005704
ENSMUSG00000033379	Atp6v0b	ATPase, H+ transporting, lysosomal V0 subunit B	0.2232	7.43052	7.65372	0.0005704
ENSMUSG00000040747	Cd53	CD53 antigen	0.8351	3.00467	3.83973	0.0005715
ENSMUSG00000036295	Lrrn3	leucine rich repeat protein 3, neuronal	-0.3832	6.10358	5.72035	0.0005728
ENSMUSG00000014498	Ankrd52	ankyrin repeat domain 52	-0.3394	6.48357	6.14417	0.000575
ENSMUSG00000027520	Zdbf2	zinc finger, DBF-type containing 2	-0.6517	4.70403	4.0523	0.0005754
ENSMUSG00000034218	Atm	ataxia telangiectasia mutated	-0.6096	4.73324	4.12362	0.0005766
ENSMUSG00000037072	Selenof	selenoprotein F	0.2548	7.02627	7.28106	0.0005783
ENSMUSG00000038384	Setd1b	SET domain containing 1B	-0.3892	6.04396	5.65472	0.0005838
ENSMUSG00000022090	Pdlim2	PDZ and LIM domain 2	0.6889	3.75464	4.44351	0.0005905
ENSMUSG00000023224	Serping1	serine (or cysteine) peptidase inhibitor, clade G,...	0.7728	3.62313	4.39591	0.0005931
ENSMUSG00000025266	Gnl3l	guanine nucleotide binding protein nucleolar 3 lik...	-0.2277	7.9457	7.71802	0.0005949
ENSMUSG00000041380	Htr2c	5-hydroxytryptamine (serotonin) receptor 2C	-0.8689	5.57189	4.70295	0.0005965
ENSMUSG00000063316	Rpl27	ribosomal protein L27	0.4471	5.17704	5.62419	0.0005969
ENSMUSG00000024431	Nr3c1	nuclear receptor subfamily 3, group C, member 1	-0.3227	6.57327	6.25059	0.0005969
ENSMUSG00000045482	Trrap	transformation/transcription domain-associated pro...	-0.2242	7.79288	7.56866	0.0005969
ENSMUSG00000052299	Ltn1	listerin E3 ubiquitin protein ligase 1	-0.3887	6.0539	5.66521	0.0006074
ENSMUSG00000024810	Il33	interleukin 33	0.4299	6.14768	6.57758	0.0006127
ENSMUSG00000054976	Nyap2	neuronal tyrosine-phophorylated phosphoinositide 3...	-0.6699	4.48596	3.81602	0.0006146
ENSMUSG00000029120	Ppp2r2c	protein phosphatase 2, regulatory subunit B, gamma	-0.168	9.0963	8.92834	0.0006239
ENSMUSG00000029310	Nudt9	nudix hydrolase 9	0.3674	5.83312	6.20053	0.0006321
ENSMUSG00000014313	Cox6c	cytochrome c oxidase subunit 6C	0.2601	7.25796	7.51806	0.0006329
ENSMUSG00000037351	Actr1b	ARP1 actin-related protein 1B, centractin beta	0.1736	8.13746	8.31106	0.0006418
ENSMUSG00000036502	Tmem255a	transmembrane protein 255A	-0.5601	5.13447	4.57439	0.0006431
ENSMUSG00000044550	Tceal3	transcription elongation factor A (SII)-like 3	0.2613	6.89314	7.1544	0.0006449
ENSMUSG00000062257	Opcml	opioid binding protein/cell adhesion molecule-like	-0.3193	7.95719	7.63793	0.0006456
ENSMUSG00000032076	Cadm1	cell adhesion molecule 1	-0.3079	7.66746	7.3596	0.0006458
ENSMUSG00000046160	Olig1	oligodendrocyte transcription factor 1	0.3696	6.64117	7.01075	0.0006464
ENSMUSG00000039952	Dag1	dystroglycan 1	-0.298	6.85666	6.55863	0.0006467
ENSMUSG00000030428	Ttyh1	tweety family member 1	0.1942	8.89521	9.08938	0.0006477
ENSMUSG00000025534	Gusb	glucuronidase, beta	0.6083	4.17944	4.78769	0.0006504
ENSMUSG00000021453	Gadd45g	growth arrest and DNA-damage-inducible 45 gamma	0.6269	4.05958	4.68646	0.0006551
ENSMUSG00000026203	Dnajb2	DnaJ heat shock protein family (Hsp40) member B2	0.3361	6.42753	6.76359	0.0006551
ENSMUSG00000025337	Sbds	SBDS ribosome maturation factor	0.3435	6.04828	6.39176	0.0006628
ENSMUSG00000038224	Serpinf2	serine (or cysteine) peptidase inhibitor, clade F,...	1.155	1.28273	2.43779	0.0006641
ENSMUSG00000022772	Senp5	SUMO/sentrin specific peptidase 5	-0.5298	5.08968	4.55987	0.0006688
ENSMUSG00000064329	Scn1a	sodium channel, voltage-gated, type I, alpha	-0.3635	6.90191	6.53844	0.0006788
ENSMUSG00000037172	Dennd11	DENN domain containing 11	-0.3262	6.45205	6.12589	0.0006803
ENSMUSG00000021390	Ogn	osteoglycin	-0.9942	3.41151	2.41729	0.000685
ENSMUSG00000027130	Slc12a6	solute carrier family 12, member 6	-0.2543	7.20467	6.95039	0.0006893
ENSMUSG00000020496	Rnf187	ring finger protein 187	0.1801	8.30734	8.48741	0.0006917
ENSMUSG00000033943	Mga	MAX gene associated	-0.3428	6.39394	6.05117	0.0006929
ENSMUSG00000039934	Gsap	gamma-secretase activating protein	0.6567	3.76485	4.42159	0.0006985
ENSMUSG00000004952	Rasa4	RAS p21 protein activator 4	0.8282	3.08016	3.90841	0.0007022
ENSMUSG00000032482	Cspg5	chondroitin sulfate proteoglycan 5	0.2496	7.95507	8.20464	0.0007067
ENSMUSG00000078970	Dnaaf10	dynein axonemal assembly factor 10	-0.4193	7.67963	7.26034	0.0007151
ENSMUSG00000010064	Slc38a3	solute carrier family 38, member 3	0.4462	6.41169	6.85787	0.0007155
ENSMUSG00000028580	Pum1	pumilio RNA-binding family member 1	-0.289	6.83005	6.54107	0.000719
ENSMUSG00000016200	Syt14	synaptotagmin XIV	-0.5772	4.93945	4.36221	0.0007206
ENSMUSG00000024403	Atp6v1g2	ATPase, H+ transporting, lysosomal V1 subunit G2	0.1529	9.14556	9.29841	0.0007315
ENSMUSG00000029420	Rimbp2	RIMS binding protein 2	-0.3973	6.9339	6.53659	0.0007344
ENSMUSG00000021709	Erbin	Erbb2 interacting protein	0.4177	6.79392	7.21164	0.0007357
ENSMUSG00000042700	Sipa1l1	signal-induced proliferation-associated 1 like 1	-0.4368	8.76569	8.32887	0.0007369
ENSMUSG00000031028	Tub	TUB bipartite transcription factor	-0.2477	8.29554	8.0478	0.0007391
ENSMUSG00000018750	Zbtb4	zinc finger and BTB domain containing 4	-0.2232	7.58563	7.3624	0.0007407
ENSMUSG00000026234	Ncl	nucleolin	0.1754	8.36551	8.54095	0.0007509
ENSMUSG00000026103	Gls	glutaminase	-0.1823	8.55891	8.37659	0.0007518
ENSMUSG00000001020	S100a4	S100 calcium binding protein A4	1.217	1.61696	2.83419	0.0007531
ENSMUSG00000051439	Cd14	CD14 antigen	1.057	2.11998	3.17724	0.0007531
ENSMUSG00000025060	Slk	STE20-like kinase	-0.2875	6.90739	6.61984	0.0007552
ENSMUSG00000046442	Ppm1e	protein phosphatase 1E (PP2C domain containing)	-0.3562	8.64414	8.28794	0.0007576
ENSMUSG00000073409	H2-Q6	histocompatibility 2, Q region locus 6	1.139	1.85756	2.99638	0.0007648
ENSMUSG00000049295	Zfp219	zinc finger protein 219	0.4189	5.3464	5.76533	0.0007657
ENSMUSG00000056629	Fkbp2	FK506 binding protein 2	0.3836	5.76911	6.15274	0.0007657
ENSMUSG00000020101	Vsir	V-set immunoregulatory receptor	0.4576	5.06136	5.51894	0.0007723
ENSMUSG00000050963	Kcns2	K+ voltage-gated channel, subfamily S, 2	-0.6201	4.70852	4.0884	0.0007754
ENSMUSG00000041881	Ndufa7	NADH:ubiquinone oxidoreductase subunit A7	0.3721	5.70743	6.07956	0.0007754
ENSMUSG00000032018	Sc5d	sterol-C5-desaturase	-0.4341	5.59807	5.164	0.0007756
ENSMUSG00000004892	Bcan	brevican	0.2266	8.3065	8.53309	0.0007781
ENSMUSG00000021250	Fos	FBJ osteosarcoma oncogene	0.6848	4.38871	5.0735	0.0007788
ENSMUSG00000015340	Cybb	cytochrome b-245, beta polypeptide	1.379	1.40273	2.78213	0.0007798
ENSMUSG00000062115	Rai1	retinoic acid induced 1	-0.2803	6.94949	6.66914	0.0007837
ENSMUSG00000009741	Ubp1	upstream binding protein 1	0.2481	6.97387	7.222	0.0007851
ENSMUSG00000032253	Phip	pleckstrin homology domain interacting protein	-0.3871	5.96361	5.57647	0.000789
ENSMUSG00000067194	Eif1ax	eukaryotic translation initiation factor 1A, X-lin...	-0.2555	7.17305	6.91751	0.00079
ENSMUSG00000027175	Tcp11l1	t-complex 11 like 1	-0.6979	4.29084	3.59292	0.0007918
ENSMUSG00000015850	Adamtsl4	ADAMTS-like 4	0.6613	3.82495	4.4863	0.0007918
ENSMUSG00000036057	Ptpn23	protein tyrosine phosphatase, non-receptor type 23	0.2844	6.58009	6.86454	0.000793
ENSMUSG00000020900	Myh10	myosin, heavy polypeptide 10, non-muscle	-0.2136	8.21065	7.99704	0.0007944
ENSMUSG00000028222	Calb1	calbindin 1	-0.3198	6.66458	6.3448	0.0007984
ENSMUSG00000032440	Tgfbr2	transforming growth factor, beta receptor II	0.5363	4.52455	5.06087	0.0008006
ENSMUSG00000032596	Uba7	ubiquitin-like modifier activating enzyme 7	0.9077	2.72033	3.62807	0.0008009
ENSMUSG00000004096	Cwc15	CWC15 spliceosome-associated protein	0.3646	5.74733	6.11193	0.0008035
ENSMUSG00000021712	Trim23	tripartite motif-containing 23	-0.4036	5.89761	5.49402	0.0008101
ENSMUSG00000046093	Hpcal4	hippocalcin-like 4	-0.5187	9.92037	9.40163	0.0008405
ENSMUSG00000053565	Eif3k	eukaryotic translation initiation factor 3, subuni...	0.3173	6.23035	6.54767	0.0008558
ENSMUSG00000002111	Spi1	Spi-1 proto-oncogene	0.9815	2.39353	3.37503	0.0008587
ENSMUSG00000026749	Nek6	NIMA (never in mitosis gene a)-related expressed k...	0.4039	5.45677	5.86067	0.0008794
ENSMUSG00000028926	Cdk14	cyclin dependent kinase 14	-0.3226	8.12345	7.80087	0.0008812
ENSMUSG00000005881	Ergic3	ERGIC and golgi 3	0.2818	6.58416	6.86598	0.0008893
ENSMUSG00000019990	Pde7b	phosphodiesterase 7B	-0.7172	4.40001	3.68277	0.0008927
ENSMUSG00000028128	F3	coagulation factor III	0.3804	5.57383	5.95419	0.0008946
ENSMUSG00000006736	Tspan31	tetraspanin 31	0.359	5.80309	6.16205	0.0008981
ENSMUSG00000055681	Cope	coatomer protein complex, subunit epsilon	0.2947	6.44096	6.73566	0.0009034
ENSMUSG00000035431	Sstr1	somatostatin receptor 1	-0.8556	3.71467	2.85906	0.000911
ENSMUSG00000032212	Sltm	SAFB-like, transcription modulator	0.2801	6.61667	6.89677	0.0009113
ENSMUSG00000056296	Synpr	synaptoporin	-0.3384	6.68852	6.35017	0.0009126
ENSMUSG00000057406	Nsd2	nuclear receptor binding SET domain protein 2	-0.2972	6.68836	6.39113	0.0009143
ENSMUSG00000020961	Ston2	stonin 2	-0.8546	3.70199	2.84742	0.000918
ENSMUSG00000045210	Vcpip1	valosin containing protein (p97)/p47 complex inter...	-0.3536	6.28131	5.92766	0.0009212
ENSMUSG00000018381	Abi3	ABI family member 3	0.8093	2.95826	3.76753	0.0009213
ENSMUSG00000066456	Hmgn3	high mobility group nucleosomal binding domain 3	0.3605	5.77524	6.13577	0.0009213
ENSMUSG00000052040	Klf13	Kruppel-like transcription factor 13	-0.3216	7.90441	7.58281	0.0009234
ENSMUSG00000029684	Wasl	WASP like actin nucleation promoting factor	-0.2497	7.30307	7.05341	0.000929
ENSMUSG00000050272	Dscam	DS cell adhesion molecule	-0.3347	6.3732	6.03848	0.0009291
ENSMUSG00000040746	Rnf167	ring finger protein 167	0.3014	6.36767	6.66905	0.0009291
ENSMUSG00000028923	Necap2	NECAP endocytosis associated 2	0.4476	5.06132	5.50892	0.0009324
ENSMUSG00000036712	Cyld	CYLD lysine 63 deubiquitinase	-0.2932	7.137	6.84381	0.0009396
ENSMUSG00000017776	Crk	v-crk avian sarcoma virus CT10 oncogene homolog	-0.2644	7.08966	6.82531	0.0009404
ENSMUSG00000027340	Slc23a2	solute carrier family 23 (nucleobase transporters)...	-0.2351	7.54743	7.31231	0.0009456
ENSMUSG00000034275	Igsf9b	immunoglobulin superfamily, member 9B	-0.9958	3.20644	2.21063	0.0009497
ENSMUSG00000025510	Cd151	CD151 antigen	0.5247	4.59412	5.11885	0.0009561
ENSMUSG00000071862	Lrrtm2	leucine rich repeat transmembrane neuronal 2	-0.4032	5.90702	5.50384	0.0009589
ENSMUSG00000034930	Rtkn	rhotekin	0.3433	5.9354	6.27871	0.000962
ENSMUSG00000037112	Sik2	salt inducible kinase 2	-0.5372	4.97329	4.4361	0.0009651
ENSMUSG00000030890	Ilk	integrin linked kinase	0.326	6.1126	6.43856	0.0009651
ENSMUSG00000029104	Htt	huntingtin	-0.2092	7.78222	7.57298	0.0009877
ENSMUSG00000058153	Sez6l	seizure related 6 homolog like	-0.2882	8.61142	8.32323	0.0009886
ENSMUSG00000002222	Rmnd5a	required for meiotic nuclear division 5 homolog A	-0.2639	7.02818	6.76426	0.0009958
ENSMUSG00000006362	Cbfa2t3	CBFA2/RUNX1 translocation partner 3	-0.4818	5.433	4.95118	0.0009968
ENSMUSG00000031840	Rab3a	RAB3A, member RAS oncogene family	0.2286	9.01127	9.23983	0.0009982
ENSMUSG00000037697	Ddhd1	DDHD domain containing 1	0.3808	6.50812	6.88888	0.001003
ENSMUSG00000063882	Uqcrh	ubiquinol-cytochrome c reductase hinge protein	0.3319	7.01636	7.34827	0.001008
ENSMUSG00000031342	Gpm6b	glycoprotein m6b	-0.1868	9.73359	9.54675	0.001011
ENSMUSG00000042228	Lyn	LYN proto-oncogene, Src family tyrosine kinase	0.7288	3.43911	4.16788	0.001014
ENSMUSG00000005779	Psmb4	proteasome (prosome, macropain) subunit, beta type...	0.2871	6.52035	6.8075	0.00102
ENSMUSG00000037138	Aff3	AF4/FMR2 family, member 3	-0.3761	6.11221	5.73608	0.001023
ENSMUSG00000031029	Eif3f	eukaryotic translation initiation factor 3, subuni...	0.28	6.59211	6.87216	0.001023
ENSMUSG00000019087	Atp6ap1	ATPase, H+ transporting, lysosomal accessory prote...	0.1644	8.43591	8.60035	0.001023
ENSMUSG00000028991	Mtor	mechanistic target of rapamycin kinase	-0.2508	7.19748	6.94666	0.001025
ENSMUSG00000057637	Prdm2	PR domain containing 2, with ZNF domain	-0.3327	6.39678	6.06406	0.001029
ENSMUSG00000025531	Chm	CHM Rab escort protein	-0.419	5.66009	5.24107	0.001032
ENSMUSG00000030701	Plekhb1	pleckstrin homology domain containing, family B (e...	0.5956	8.49188	9.08748	0.001038
ENSMUSG00000033411	Ctdspl2	CTD small phosphatase like 2	-0.6159	4.48674	3.87086	0.001043
ENSMUSG00000026319	Relch	RAB11 binding and LisH domain, coiled-coil and HEA...	-0.3344	6.26893	5.93453	0.001043
ENSMUSG00000010175	Prox1	prospero homeobox 1	-0.4992	6.7334	6.23424	0.001047
ENSMUSG00000029765	Plxna4	plexin A4	-0.4417	7.80286	7.36119	0.001052
ENSMUSG00000019943	Atp2b1	ATPase, Ca++ transporting, plasma membrane 1	-0.4163	9.75433	9.33803	0.001059
ENSMUSG00000043323	Fbrsl1	fibrosin-like 1	0.3323	6.04609	6.37843	0.001063
ENSMUSG00000038271	Iffo1	intermediate filament family orphan 1	0.3118	6.16213	6.47396	0.001063
ENSMUSG00000033192	Lpcat2	lysophosphatidylcholine acyltransferase 2	0.6144	3.94806	4.56243	0.001071
ENSMUSG00000030047	Arhgap25	Rho GTPase activating protein 25	0.9194	2.63408	3.55345	0.001076
ENSMUSG00000039278	Pcsk1n	proprotein convertase subtilisin/kexin type 1 inhi...	0.5477	7.93185	8.47953	0.001076
ENSMUSG00000066640	Fbxl18	F-box and leucine-rich repeat protein 18	-0.3778	6.00976	5.63194	0.001083
ENSMUSG00000026872	Zeb2	zinc finger E-box binding homeobox 2	-0.3471	7.94412	7.59705	0.001083
ENSMUSG00000034459	Ifit1	interferon-induced protein with tetratricopeptide ...	0.9439	2.17273	3.11658	0.001087
ENSMUSG00000034158	Lrrc58	leucine rich repeat containing 58	-0.29	6.77154	6.48153	0.001089
ENSMUSG00000032224	Fam81a	family with sequence similarity 81, member A	-0.4072	7.1167	6.70955	0.001092
ENSMUSG00000034111	Tmed8	transmembrane p24 trafficking protein 8	-0.3736	6.012	5.63835	0.001094
ENSMUSG00000024737	Slc15a3	solute carrier family 15, member 3	1.076	2.15546	3.23138	0.001098
ENSMUSG00000050505	Pcdh20	protocadherin 20	-0.6945	6.71739	6.02294	0.001098
ENSMUSG00000064127	Med14	mediator complex subunit 14	-0.3134	6.55338	6.23995	0.001104
ENSMUSG00000061451	Tmem151a	transmembrane protein 151A	0.2048	7.66781	7.87257	0.001116
ENSMUSG00000015568	Lpl	lipoprotein lipase	0.6219	5.58998	6.21192	0.001118
ENSMUSG00000014294	Ndufa2	NADH:ubiquinone oxidoreductase subunit A2	0.3865	5.60051	5.98702	0.001118
ENSMUSG00000041308	Sntb2	syntrophin, basic 2	-0.8066	3.80485	2.99826	0.001123
ENSMUSG00000054405	Dnajc8	DnaJ heat shock protein family (Hsp40) member C8	0.2911	6.4284	6.71947	0.001129
ENSMUSG00000004897	Hdgf	heparin binding growth factor	0.2239	7.25631	7.48021	0.001132
ENSMUSG00000031818	Cox4i1	cytochrome c oxidase subunit 4I1	0.3078	8.52743	8.83522	0.001136
ENSMUSG00000047514	Tspyl1	testis-specific protein, Y-encoded-like 1	-0.2198	7.65615	7.43634	0.001136
ENSMUSG00000069729	Arid1b	AT-rich interaction domain 1B	-0.2919	7.0241	6.73217	0.001141
ENSMUSG00000027602	Map1lc3a	microtubule-associated protein 1 light chain 3 alp...	0.2913	6.61108	6.9024	0.001141
ENSMUSG00000003847	Nfat5	nuclear factor of activated T cells 5	-0.2758	6.98389	6.70809	0.001141
ENSMUSG00000072825	Cep170b	centrosomal protein 170B	-0.1894	8.27115	8.0817	0.001143
ENSMUSG00000070047	Fat1	FAT atypical cadherin 1	-0.3862	5.95064	5.56442	0.001148
ENSMUSG00000020358	Hnrnpab	heterogeneous nuclear ribonucleoprotein A/B	0.2395	7.02536	7.26487	0.001151
ENSMUSG00000037166	Ppp1r14a	protein phosphatase 1, regulatory inhibitor subuni...	0.741	3.35593	4.0969	0.001156
ENSMUSG00000063873	Slc24a3	solute carrier family 24 (sodium/potassium/calcium...	-0.2233	7.86835	7.64508	0.001176
ENSMUSG00000054942	Miga1	mitoguardin 1	-0.2821	6.75287	6.47077	0.001177
ENSMUSG00000040836	Gpr161	G protein-coupled receptor 161	-0.4694	6.4088	5.93936	0.001185
ENSMUSG00000039205	Ciz1	CDKN1A interacting zinc finger protein 1	0.3168	6.16913	6.48594	0.001194
ENSMUSG00000024576	Csnk1a1	casein kinase 1, alpha 1	-0.1922	8.25942	8.06722	0.001196
ENSMUSG00000035045	Zc3h12b	zinc finger CCCH-type containing 12B	-0.5569	4.90727	4.35033	0.001212
ENSMUSG00000027406	Idh3b	isocitrate dehydrogenase 3 (NAD+) beta	0.1836	7.84475	8.02838	0.001214
ENSMUSG00000063410	Stk24	serine/threonine kinase 24	-0.4208	5.618	5.19715	0.001217
ENSMUSG00000029413	Naaa	N-acylethanolamine acid amidase	0.3924	5.49671	5.88913	0.001219
ENSMUSG00000031870	Pgr	progesterone receptor	-0.7162	4.08241	3.3662	0.001235
ENSMUSG00000026895	Ndufa8	NADH:ubiquinone oxidoreductase subunit A8	0.2827	6.45993	6.74268	0.001235
ENSMUSG00000095567	Noc2l	NOC2 like nucleolar associated transcriptional rep...	0.2654	6.666	6.93139	0.001238
ENSMUSG00000073725	Lmbrd1	LMBR1 domain containing 1	-0.232	7.39773	7.16575	0.001238
ENSMUSG00000033940	Brk1	BRICK1, SCAR/WAVE actin-nucleating complex subunit	0.2503	6.92014	7.17044	0.001246
ENSMUSG00000041801	Phlda3	pleckstrin homology like domain, family A, member ...	0.6572	3.82193	4.47916	0.001249
ENSMUSG00000021929	Kpna3	karyopherin subunit alpha 3	-0.3102	6.51653	6.20629	0.001249
ENSMUSG00000002010	Idh3g	isocitrate dehydrogenase 3 (NAD+), gamma	0.2322	7.09178	7.32396	0.00125
ENSMUSG00000025220	Oga	O-GlcNAcase	-0.1952	7.86698	7.67174	0.00125
ENSMUSG00000028030	Tbck	TBC1 domain containing kinase	-0.7077	4.12125	3.41359	0.001265
ENSMUSG00000041889	Shisa4	shisa family member 4	0.2702	6.74129	7.01148	0.001277
ENSMUSG00000040312	Cchcr1	coiled-coil alpha-helical rod protein 1	0.8012	2.97477	3.77594	0.001281
ENSMUSG00000028630	Dyrk2	dual-specificity tyrosine phosphorylation regulate...	-0.696	4.31943	3.62347	0.001282
ENSMUSG00000068267	Cenpb	centromere protein B	0.216	7.40145	7.6174	0.001286
ENSMUSG00000048047	Zbtb33	zinc finger and BTB domain containing 33	-0.5854	4.74656	4.16117	0.001298
ENSMUSG00000028821	Syf2	SYF2 homolog, RNA splicing factor (S. cerevisiae)	0.3845	5.47067	5.85521	0.001298
ENSMUSG00000021413	Prpf4b	pre-mRNA processing factor 4B	-0.2977	6.59725	6.29957	0.001298
ENSMUSG00000001909	Trmt1	tRNA methyltransferase 1	0.2927	6.37346	6.66613	0.001298
ENSMUSG00000040552	C3ar1	complement component 3a receptor 1	1.047	2.16886	3.21595	0.001301
ENSMUSG00000034413	Neurl1b	neuralized E3 ubiquitin protein ligase 1B	-0.3832	6.07147	5.68824	0.001307
ENSMUSG00000046240	Hepacam	hepatocyte cell adhesion molecule	0.313	6.91609	7.22912	0.001311
ENSMUSG00000027423	Snx5	sorting nexin 5	0.3063	6.24905	6.55539	0.001316
ENSMUSG00000005732	Ranbp1	RAN binding protein 1	0.3562	5.76816	6.12432	0.001321
ENSMUSG00000002524	Puf60	poly-U binding splicing factor 60	0.2348	7.07129	7.30606	0.001337
ENSMUSG00000035964	Tmem59l	transmembrane protein 59-like	0.209	8.02907	8.23806	0.001338
ENSMUSG00000007850	Hnrnph1	heterogeneous nuclear ribonucleoprotein H1	0.1999	8.02691	8.22678	0.001357
ENSMUSG00000049323	Smcr8	Smith-Magenis syndrome chromosome region, candidat...	-0.3945	5.79889	5.40436	0.001358
ENSMUSG00000028797	Tmem234	transmembrane protein 234	0.309	6.1539	6.46286	0.00136
ENSMUSG00000030084	Plxna1	plexin A1	-0.3524	7.75693	7.40458	0.001361
ENSMUSG00000035569	Ankrd11	ankyrin repeat domain 11	-0.181	8.17442	7.99341	0.001377
ENSMUSG00000018770	Atp5mc3	ATP synthase membrane subunit c locus 3	0.218	7.59189	7.80985	0.00141
ENSMUSG00000004264	Phb2	prohibitin 2	0.3204	6.01823	6.33865	0.001411
ENSMUSG00000073678	Pgap1	post-GPI attachment to proteins 1	-0.5363	4.91282	4.37656	0.001413
ENSMUSG00000060206	Zfp462	zinc finger protein 462	-0.3877	5.8822	5.49449	0.001428
ENSMUSG00000019966	Kitl	kit ligand	-0.6246	4.68366	4.05904	0.001435
ENSMUSG00000069089	Cdk7	cyclin dependent kinase 7	-0.3827	5.84941	5.4667	0.001435
ENSMUSG00000024944	Arl2	ADP-ribosylation factor-like 2	0.3721	5.55453	5.92663	0.001438
ENSMUSG00000054256	Msi1	musashi RNA-binding protein 1	0.3834	5.501	5.88443	0.001451
ENSMUSG00000044468	Tent5c	terminal nucleotidyltransferase 5C	0.8501	2.8113	3.66137	0.001465
ENSMUSG00000028402	Mpdz	multiple PDZ domain crumbs cell polarity complex c...	-0.3074	6.56702	6.25958	0.001467
ENSMUSG00000021903	Galnt15	polypeptide N-acetylgalactosaminyltransferase 15	0.911	2.58225	3.49325	0.001468
ENSMUSG00000025868	Higd2a	HIG1 domain family, member 2A	0.3389	5.85892	6.19779	0.00148
ENSMUSG00000038172	Ttc39b	tetratricopeptide repeat domain 39B	-0.3865	5.93774	5.55121	0.001482
ENSMUSG00000040433	Zbtb38	zinc finger and BTB domain containing 38	-0.3529	6.08507	5.73219	0.001488
ENSMUSG00000039000	Ube3c	ubiquitin protein ligase E3C	-0.3066	6.60456	6.29795	0.001492
ENSMUSG00000030717	Nupr1	nuclear protein transcription regulator 1	0.8159	2.83989	3.65578	0.001507
ENSMUSG00000033595	Lgi3	leucine-rich repeat LGI family, member 3	0.3307	7.04846	7.37917	0.001507
ENSMUSG00000055761	Nkain3	Na+/K+ transporting ATPase interacting 3	-0.9132	3.22	2.30684	0.001521
ENSMUSG00000041220	Elovl6	ELOVL fatty acid elongase 6	-0.3733	5.9794	5.60609	0.001521
ENSMUSG00000022100	Xpo7	exportin 7	-0.298	6.58185	6.28388	0.001521
ENSMUSG00000029190	D5Ertd579e	DNA segment, Chr 5, ERATO Doi 579, expressed	-0.2371	7.26602	7.02895	0.001521
ENSMUSG00000020986	Sec23a	SEC23 homolog A, COPII coat complex component	-0.275	6.88759	6.61257	0.001523
ENSMUSG00000024456	Diaph1	diaphanous related formin 1	-0.3247	6.49141	6.16674	0.001526
ENSMUSG00000027245	Hypk	huntingtin interacting protein K	0.3674	5.58792	5.95531	0.001527
ENSMUSG00000062785	Kcnc3	potassium voltage gated channel, Shaw-related subf...	-0.3648	7.81182	7.44698	0.001531
ENSMUSG00000043885	Slc36a4	solute carrier family 36 (proton/amino acid sympor...	-0.3339	6.21937	5.88548	0.001535
ENSMUSG00000045180	Shroom2	shroom family member 2	-0.3182	6.44819	6.13003	0.001535
ENSMUSG00000037857	Nufip2	nuclear FMR1 interacting protein 2	-0.4651	5.31631	4.85118	0.001542
ENSMUSG00000024962	Vegfb	vascular endothelial growth factor B	0.3538	5.81644	6.1702	0.001556
ENSMUSG00000005354	Txn2	thioredoxin 2	0.2652	6.61768	6.88289	0.001564
ENSMUSG00000024383	Map3k2	mitogen-activated protein kinase kinase kinase 2	-0.4661	5.31329	4.84721	0.001586
ENSMUSG00000032698	Lmo2	LIM domain only 2	0.5687	4.16839	4.73705	0.00159
ENSMUSG00000033769	Exoc6b	exocyst complex component 6B	-0.2574	7.2017	6.94433	0.00159
ENSMUSG00000033488	Cryzl2	crystallin zeta like 2	0.6914	3.51852	4.20992	0.001613
ENSMUSG00000051527	Usp29	ubiquitin specific peptidase 29	-0.8157	3.74267	2.92692	0.001614
ENSMUSG00000023089	Ndufa5	NADH:ubiquinone oxidoreductase subunit A5	0.3324	5.9877	6.32007	0.001614
ENSMUSG00000022861	Dgkg	diacylglycerol kinase, gamma	-0.6557	7.39761	6.74193	0.001623
ENSMUSG00000022148	Fyb1	FYN binding protein 1	0.7329	3.30926	4.04212	0.001625
ENSMUSG00000036995	Asap3	ArfGAP with SH3 domain, ankyrin repeat and PH doma...	0.7854	2.93359	3.71902	0.001626
ENSMUSG00000021721	Htr1a	5-hydroxytryptamine (serotonin) receptor 1A	-0.508	5.12876	4.62077	0.001635
ENSMUSG00000043463	Rab9b	RAB9B, member RAS oncogene family	-0.5073	5.03788	4.53058	0.001651
ENSMUSG00000001248	Gramd1a	GRAM domain containing 1A	0.2292	7.0461	7.27528	0.001657
ENSMUSG00000005417	Mprip	myosin phosphatase Rho interacting protein	-0.151	8.72327	8.57224	0.001657
ENSMUSG00000021822	Plau	plasminogen activator, urokinase	0.9493	2.2333	3.18259	0.001658
ENSMUSG00000028936	Rpl22	ribosomal protein L22	0.2655	6.63593	6.90138	0.00167
ENSMUSG00000026822	Lcn2	lipocalin 2	1.466	0.88371	2.35008	0.001684
ENSMUSG00000056515	Rab31	RAB31, member RAS oncogene family	0.3202	6.24419	6.56441	0.001704
ENSMUSG00000020366	Mapk9	mitogen-activated protein kinase 9	-0.2052	7.68087	7.47569	0.001704
ENSMUSG00000047215	Rpl9	ribosomal protein L9	0.2559	7.31037	7.56625	0.001712
ENSMUSG00000021262	Evl	Ena-vasodilator stimulated phosphoprotein	0.2972	6.77196	7.06917	0.001716
ENSMUSG00000020015	Cdk17	cyclin dependent kinase 17	-0.2584	7.28362	7.02525	0.001729
ENSMUSG00000036510	Cdh8	cadherin 8	-0.3946	5.87989	5.48533	0.001738
ENSMUSG00000092083	Kcnb2	potassium voltage gated channel, Shab-related subf...	-0.5435	4.82891	4.28541	0.001752
ENSMUSG00000035521	Gnptg	N-acetylglucosamine-1-phosphotransferase, gamma su...	0.2994	6.22197	6.52138	0.001753
ENSMUSG00000025899	Alkbh8	alkB homolog 8, tRNA methyltransferase	-0.6518	4.26732	3.6155	0.001758
ENSMUSG00000070319	Eif3g	eukaryotic translation initiation factor 3, subuni...	0.3182	6.0321	6.35027	0.001784
ENSMUSG00000038121	Fam210a	family with sequence similarity 210, member A	-0.4128	5.60146	5.18869	0.00181
ENSMUSG00000002014	Ssr4	signal sequence receptor, delta	0.3985	5.29221	5.69076	0.00181
ENSMUSG00000031897	Psmb10	proteasome (prosome, macropain) subunit, beta type...	0.4774	4.65525	5.13266	0.001812
ENSMUSG00000006782	Cnp	2',3'-cyclic nucleotide 3' phosphodiesterase	0.4663	8.20963	8.67591	0.00183
ENSMUSG00000038916	Mtcl3	MTCL family member 3	-0.3736	6.04741	5.6738	0.001831
ENSMUSG00000039830	Olig2	oligodendrocyte transcription factor 2	0.4787	4.84873	5.32741	0.001832
ENSMUSG00000003992	Ssbp2	single-stranded DNA binding protein 2	-0.3306	6.25958	5.92902	0.001838
ENSMUSG00000020486	Septin4	septin 4	0.5367	7.49739	8.0341	0.001859
ENSMUSG00000000902	Smarcb1	SWI/SNF related, matrix associated, actin dependen...	0.3053	6.13573	6.44107	0.001863
ENSMUSG00000021025	Nfkbia	nuclear factor of kappa light polypeptide gene enh...	0.4892	4.52824	5.01748	0.001866
ENSMUSG00000043019	Edem3	ER degradation enhancer, mannosidase alpha-like 3	-0.3716	5.87847	5.50689	0.001866
ENSMUSG00000021171	Esyt2	extended synaptotagmin-like protein 2	-0.3692	5.8418	5.47259	0.001866
ENSMUSG00000038248	Sobp	sine oculis binding protein	-0.3055	6.98371	6.67823	0.001868
ENSMUSG00000041607	Mbp	myelin basic protein	0.4257	11.47	11.8957	0.001875
ENSMUSG00000067889	Sptbn2	spectrin beta, non-erythrocytic 2	-0.328	10.5072	10.1792	0.001881
ENSMUSG00000005362	Crbn	cereblon	-0.3293	6.17562	5.84628	0.001891
ENSMUSG00000027566	Psma7	proteasome subunit alpha 7	0.2907	6.32298	6.61369	0.001901
ENSMUSG00000024777	Ppp2r5b	protein phosphatase 2, regulatory subunit B', beta	0.2309	7.08753	7.31839	0.001909
ENSMUSG00000050967	Creg2	cellular repressor of E1A-stimulated genes 2	-0.3629	7.41267	7.04975	0.001916
ENSMUSG00000038116	Phf20	PHD finger protein 20	-0.2838	6.77129	6.48752	0.001917
ENSMUSG00000070923	Klhl9	kelch-like 9	-0.2717	6.76137	6.48966	0.00192
ENSMUSG00000032402	Smad3	SMAD family member 3	-0.3839	6.54194	6.15806	0.001924
ENSMUSG00000098557	Kctd12	potassium channel tetramerisation domain containin...	-0.3964	7.13981	6.74344	0.001938
ENSMUSG00000037031	Tspan15	tetraspanin 15	0.5	4.47964	4.9796	0.001941
ENSMUSG00000003575	Crtc1	CREB regulated transcription coactivator 1	-0.3384	8.39051	8.05209	0.001942
ENSMUSG00000069670	Nkain2	Na+/K+ transporting ATPase interacting 2	-0.3938	5.69811	5.30435	0.001953
ENSMUSG00000024208	Uqcc2	ubiquinol-cytochrome c reductase complex assembly ...	0.389	5.44062	5.82958	0.001953
ENSMUSG00000004933	Matk	megakaryocyte-associated tyrosine kinase	0.2254	7.7836	8.00897	0.001956
ENSMUSG00000045103	Dmd	dystrophin, muscular dystrophy	-0.3469	6.09578	5.74893	0.002009
ENSMUSG00000018965	Ywhah	tyrosine 3-monooxygenase/tryptophan 5-monooxygenas...	0.1212	9.42691	9.54811	0.002035
ENSMUSG00000027074	Slc43a3	solute carrier family 43, member 3	1.198	1.4206	2.61898	0.002037
ENSMUSG00000041225	Arhgap12	Rho GTPase activating protein 12	-0.3433	6.32278	5.97948	0.002049
ENSMUSG00000026032	Ndufb3	NADH:ubiquinone oxidoreductase subunit B3	0.3428	5.70605	6.04889	0.00205
ENSMUSG00000054428	Atp5if1	ATP synthase inhibitory factor subunit 1	0.2692	6.70122	6.97044	0.002051
ENSMUSG00000058672	Tubb2a	tubulin, beta 2A class IIA	0.1509	8.81924	8.97018	0.00206
ENSMUSG00000025609	Mkln1	muskelin 1, intracellular mediator containing kelc...	-0.2654	6.81593	6.55058	0.002062
ENSMUSG00000006134	Crkl	v-crk avian sarcoma virus CT10 oncogene homolog-li...	-0.3997	5.64083	5.24115	0.002069
ENSMUSG00000054027	Nt5dc3	5'-nucleotidase domain containing 3	-0.2803	8.1741	7.89376	0.002072
ENSMUSG00000000732	Icosl	icos ligand	0.5616	4.20985	4.77145	0.002076
ENSMUSG00000027848	Olfml3	olfactomedin-like 3	0.5798	4.69708	5.27688	0.002087
ENSMUSG00000038608	Dock10	dedicator of cytokinesis 10	-0.2915	6.8356	6.54408	0.002092
ENSMUSG00000031924	Cyb5b	cytochrome b5 type B	-0.208	7.62281	7.41484	0.002105
ENSMUSG00000033423	Eri3	exoribonuclease 3	0.2388	6.84402	7.08286	0.002107
ENSMUSG00000041096	Tspyl2	TSPY-like 2	0.2368	7.08277	7.3196	0.002109
ENSMUSG00000056917	Sipa1	signal-induced proliferation associated gene 1	0.5436	4.2542	4.79782	0.002112
ENSMUSG00000053963	Stum	mechanosensory transduction mediator	-0.4316	9.30921	8.87758	0.002112
ENSMUSG00000033214	Slitrk5	SLIT and NTRK-like family, member 5	-0.3464	6.43677	6.09032	0.002119
ENSMUSG00000008540	Mgst1	microsomal glutathione S-transferase 1	0.6891	3.36566	4.05479	0.002155
ENSMUSG00000065990	Aurkaip1	aurora kinase A interacting protein 1	0.3834	5.41335	5.79679	0.002155
ENSMUSG00000026123	Plekhb2	pleckstrin homology domain containing, family B (e...	-0.2087	7.91705	7.70839	0.002155
ENSMUSG00000020964	Sel1l	sel-1 suppressor of lin-12-like (C. elegans)	-0.2031	7.71508	7.51194	0.002155
ENSMUSG00000009013	Dynll1	dynein light chain LC8-type 1	0.1961	7.75576	7.9519	0.002182
ENSMUSG00000024099	Ndufv2	NADH:ubiquinone oxidoreductase core subunit V2	0.247	6.85595	7.10291	0.002197
ENSMUSG00000026775	Yme1l1	YME1-like 1 (S. cerevisiae)	-0.3062	6.4103	6.10412	0.002198
ENSMUSG00000035478	Mbd3	methyl-CpG binding domain protein 3	0.2679	6.52269	6.79055	0.002199
ENSMUSG00000028833	Ncdn	neurochondrin	-0.2926	11.2747	10.982	0.0022
ENSMUSG00000006050	Sra1	steroid receptor RNA activator 1	0.301	6.13364	6.43461	0.002206
ENSMUSG00000039252	Lgi2	leucine-rich repeat LGI family, member 2	-0.6576	4.23616	3.57857	0.00221
ENSMUSG00000039988	Ankrd13c	ankyrin repeat domain 13c	-0.3851	5.74952	5.36441	0.00221
ENSMUSG00000055541	Lair1	leukocyte-associated Ig-like receptor 1	0.6976	3.38768	4.08533	0.002214
ENSMUSG00000022141	Nipbl	NIPBL cohesin loading factor	-0.3538	5.97403	5.62021	0.002215
ENSMUSG00000036504	Phpt1	phosphohistidine phosphatase 1	0.3896	5.28871	5.67827	0.002242
ENSMUSG00000038048	Cntnap5c	contactin associated protein-like 5C	-0.8525	3.5645	2.71202	0.002252
ENSMUSG00000002603	Tgfb1	transforming growth factor, beta 1	0.7861	3.04365	3.82973	0.002255
ENSMUSG00000048027	Rgmb	repulsive guidance molecule family member B	-0.4056	5.65467	5.24908	0.002255
ENSMUSG00000031137	Fgf13	fibroblast growth factor 13	-0.3517	7.41932	7.06762	0.002267
ENSMUSG00000031626	Sorbs2	sorbin and SH3 domain containing 2	-0.2571	7.1256	6.86847	0.002275
ENSMUSG00000072772	Grcc10	gene rich cluster, C10 gene	0.2896	6.30051	6.59007	0.002305
ENSMUSG00000060373	Hnrnpc	heterogeneous nuclear ribonucleoprotein C	0.1989	7.44312	7.642	0.002305
ENSMUSG00000019790	Stxbp5	syntaxin binding protein 5 (tomosyn)	-0.2582	7.10183	6.84362	0.002311
ENSMUSG00000027035	Cers6	ceramide synthase 6	-0.3132	6.48378	6.17057	0.002312
ENSMUSG00000031231	Cox7b	cytochrome c oxidase subunit 7B	0.299	6.75073	7.04977	0.002317
ENSMUSG00000032301	Psma4	proteasome subunit alpha 4	0.2956	6.15204	6.44768	0.002325
ENSMUSG00000025537	Phkg1	phosphorylase kinase gamma 1	0.4583	4.75451	5.21286	0.002337
ENSMUSG00000031960	Aars1	alanyl-tRNA synthetase 1	0.1946	7.58394	7.77853	0.002365
ENSMUSG00000064061	Dzip3	DAZ interacting protein 3, zinc finger	-0.3032	6.43218	6.12893	0.002381
ENSMUSG00000022789	Dnm1l	dynamin 1-like	-0.1983	7.86473	7.6664	0.002384
ENSMUSG00000033220	Rac2	Rac family small GTPase 2	0.9358	2.22718	3.16295	0.002389
ENSMUSG00000024359	Hspa9	heat shock protein 9	0.1774	7.84921	8.02661	0.002395
ENSMUSG00000026941	Mamdc4	MAM domain containing 4	0.4016	5.26082	5.66237	0.002397
ENSMUSG00000003279	Dlgap1	DLG associated protein 1	-0.3221	9.29149	8.9694	0.002397
ENSMUSG00000029632	Ndufa4	Ndufa4, mitochondrial complex associated	0.2274	7.32909	7.55652	0.002402
ENSMUSG00000024454	Hdac3	histone deacetylase 3	0.253	6.63024	6.88324	0.002424
ENSMUSG00000035713	Usp35	ubiquitin specific peptidase 35	0.4286	4.9405	5.36911	0.002425
ENSMUSG00000034771	Tle2	transducin-like enhancer of split 2	0.3974	5.18626	5.58371	0.002425
ENSMUSG00000022307	Oxr1	oxidation resistance 1	-0.2863	8.07863	7.79234	0.002431
ENSMUSG00000039197	Adk	adenosine kinase	0.3494	5.66109	6.01045	0.002438
ENSMUSG00000029623	Pdap1	PDGFA associated protein 1	0.2532	6.65472	6.90787	0.002438
ENSMUSG00000056812	St8sia3	ST8 alpha-N-acetyl-neuraminide alpha-2,8-sialyltra...	-0.2485	7.2834	7.0349	0.002438
ENSMUSG00000032601	Prkar2a	protein kinase, cAMP dependent regulatory, type II...	-0.3488	6.0297	5.68093	0.002454
ENSMUSG00000052539	Magi3	membrane associated guanylate kinase, WW and PDZ d...	-0.3732	5.82435	5.45114	0.002462
ENSMUSG00000061353	Cxcl12	C-X-C motif chemokine ligand 12	-0.3814	5.87654	5.49519	0.002463
ENSMUSG00000062866	Phactr2	phosphatase and actin regulator 2	-0.4448	5.36062	4.91585	0.002471
ENSMUSG00000058254	Tspan7	tetraspanin 7	0.162	10.0392	10.2012	0.002481
ENSMUSG00000031691	Tnpo2	transportin 2 (importin 3, karyopherin beta 2b)	-0.217	7.42153	7.2045	0.002509
ENSMUSG00000011960	Ccnt1	cyclin T1	-0.3956	5.58677	5.19115	0.002534
ENSMUSG00000035649	Zcchc7	zinc finger, CCHC domain containing 7	0.2872	6.29247	6.5797	0.002552
ENSMUSG00000020841	Cpd	carboxypeptidase D	-0.2582	6.94135	6.68313	0.002553
ENSMUSG00000092470	Gm20518	predicted gene 20518	-0.3558	6.04832	5.69249	0.002556
ENSMUSG00000042807	Hecw2	HECT, C2 and WW domain containing E3 ubiquitin pro...	-0.4746	5.3108	4.83621	0.002564
ENSMUSG00000059734	Ndufs8	NADH:ubiquinone oxidoreductase core subunit S8	0.3197	5.96356	6.28326	0.002572
ENSMUSG00000010086	Rnf112	ring finger protein 112	0.2145	8.79059	9.0051	0.002577
ENSMUSG00000025511	Tspan4	tetraspanin 4	0.6015	3.8252	4.42668	0.00258
ENSMUSG00000034751	Mast4	microtubule associated serine/threonine kinase fam...	-0.3027	6.47277	6.17009	0.002583
ENSMUSG00000018574	Acadvl	acyl-Coenzyme A dehydrogenase, very long chain	0.3545	5.61106	5.96558	0.00259
ENSMUSG00000033953	Ppp3r1	protein phosphatase 3, regulatory subunit B, alpha...	-0.2647	9.61183	9.34709	0.002592
ENSMUSG00000004698	Hdac9	histone deacetylase 9	-0.4879	5.08754	4.59964	0.002598
ENSMUSG00000000149	Gna12	guanine nucleotide binding protein, alpha 12	0.2641	6.87654	7.14063	0.002638
ENSMUSG00000026277	Stk25	serine/threonine kinase 25 (yeast)	0.1643	8.04059	8.20491	0.002638
ENSMUSG00000027347	Rasgrp1	RAS guanyl releasing protein 1	-0.3629	9.24018	8.8773	0.00267
ENSMUSG00000026663	Atf6	activating transcription factor 6	-0.3077	6.55735	6.24964	0.002712
ENSMUSG00000015377	Dennd6b	DENN domain containing 6B	0.2975	6.41799	6.71551	0.002712
ENSMUSG00000017677	Wsb1	WD repeat and SOCS box-containing 1	0.2519	6.8325	7.0844	0.002712
ENSMUSG00000074748	Atxn7l3b	ataxin 7-like 3B	-0.2035	7.54794	7.34447	0.002725
ENSMUSG00000029212	Gabrb1	gamma-aminobutyric acid type A receptor subunit be...	-0.425	5.39248	4.96748	0.002738
ENSMUSG00000024261	Syt4	synaptotagmin IV	-0.2425	7.17479	6.93229	0.00275
ENSMUSG00000020640	Itsn2	intersectin 2	-0.336	6.08272	5.74676	0.00276
ENSMUSG00000024853	Sf3b2	splicing factor 3b, subunit 2	0.1568	8.14081	8.29762	0.002768
ENSMUSG00000031385	Plxnb3	plexin B3	0.4142	5.2272	5.64143	0.002771
ENSMUSG00000024965	Fermt3	fermitin family member 3	0.8278	2.76191	3.58973	0.002779
ENSMUSG00000024515	Smad4	SMAD family member 4	-0.4452	5.33326	4.88805	0.0028
ENSMUSG00000051177	Plcb1	phospholipase C, beta 1	-0.3345	7.80538	7.47093	0.002815
ENSMUSG00000020152	Actr2	actin related protein 2	-0.1971	8.46173	8.26462	0.002823
ENSMUSG00000040751	Lat2	linker for activation of T cells family, member 2	1.006	2.04316	3.04886	0.002824
ENSMUSG00000044465	Fhip1b	FHF complex subunit HOOK interacting protein 1B	-0.3032	6.43217	6.12892	0.002832
ENSMUSG00000017740	Slc12a5	solute carrier family 12, member 5	-0.1664	9.05888	8.89247	0.002832
ENSMUSG00000035936	Aldh5a1	aldhehyde dehydrogenase family 5, subfamily A1	-0.2511	6.95039	6.69933	0.002837
ENSMUSG00000029720	Gm20605	predicted gene 20605	0.3342	5.82706	6.16125	0.002854
ENSMUSG00000030707	Coro1a	coronin, actin binding protein 1A	0.2755	6.3994	6.67491	0.002854
ENSMUSG00000021559	Dapk1	death associated protein kinase 1	-0.2606	7.37558	7.11493	0.002875
ENSMUSG00000033676	Gabrb3	GABRB3, gamma-aminobutyric acid type A receptor su...	-0.2663	8.48101	8.21469	0.002889
ENSMUSG00000044667	Plppr4	phospholipid phosphatase related 4	-0.3705	8.39483	8.02429	0.002895
ENSMUSG00000069895	Atxn1l	ataxin 1-like	-0.3671	5.80006	5.43292	0.002901
ENSMUSG00000022797	Tfrc	transferrin receptor	-0.3075	6.49106	6.1836	0.002901
ENSMUSG00000058076	Sdhc	succinate dehydrogenase complex, subunit C, integr...	0.2729	6.42544	6.69831	0.002901
ENSMUSG00000009585	Apobec3	apolipoprotein B mRNA editing enzyme, catalytic po...	0.8375	2.65935	3.49688	0.002905
ENSMUSG00000030007	Cct7	chaperonin containing TCP1 subunit 7	0.2024	7.32415	7.52652	0.002905
ENSMUSG00000041444	Arhgap32	Rho GTPase activating protein 32	-0.4032	7.84743	7.44423	0.002929
ENSMUSG00000069744	Psmb3	proteasome (prosome, macropain) subunit, beta type...	0.3592	5.4832	5.84235	0.002938
ENSMUSG00000009863	Sdhb	succinate dehydrogenase complex, subunit B, iron s...	0.2581	6.57258	6.83068	0.00294
ENSMUSG00000027215	Cd82	CD82 antigen	0.4661	4.75109	5.21721	0.002945
ENSMUSG00000036819	Jmjd4	jumonji domain containing 4	-0.454	5.23581	4.78179	0.002962
ENSMUSG00000001300	Efnb2	ephrin B2	-0.448	5.46338	5.01543	0.002972
ENSMUSG00000074151	Nlrc5	NLR family, CARD domain containing 5	1.005	1.66141	2.6669	0.002976
ENSMUSG00000011148	Adss1	adenylosuccinate synthase 1	0.564	4.17892	4.74296	0.002976
ENSMUSG00000029925	Tbxas1	thromboxane A synthase 1, platelet	0.9323	2.218	3.15035	0.002977
ENSMUSG00000035027	Map2k2	mitogen-activated protein kinase kinase 2	0.2807	6.25325	6.53394	0.002985
ENSMUSG00000031400	G6pdx	glucose-6-phosphate dehydrogenase X-linked	0.4095	5.17388	5.58338	0.002989
ENSMUSG00000058624	Gda	guanine deaminase	-0.4538	7.76086	7.30709	0.003002
ENSMUSG00000031314	Taf1	TATA-box binding protein associated factor 1	-0.2759	6.61708	6.34115	0.003009
ENSMUSG00000034595	Ppp1r18	protein phosphatase 1, regulatory subunit 18	0.6543	3.57903	4.23338	0.003039
ENSMUSG00000087141	Plcxd2	phosphatidylinositol-specific phospholipase C, X d...	-0.4924	5.48135	4.98897	0.003051
ENSMUSG00000026442	Nfasc	neurofascin	0.1667	8.50205	8.6688	0.003076
ENSMUSG00000035898	Uba6	ubiquitin-like modifier activating enzyme 6	-0.6476	4.22117	3.57355	0.003096
ENSMUSG00000016541	Atxn10	ataxin 10	0.1579	8.06049	8.21841	0.003118
ENSMUSG00000030180	Kdm5a	lysine demethylase 5A	-0.3683	5.75763	5.38933	0.00312
ENSMUSG00000034059	Ypel4	yippee like 4	0.2786	6.32485	6.60346	0.00312
ENSMUSG00000025016	Tm9sf3	transmembrane 9 superfamily member 3	-0.2219	7.30666	7.08481	0.003133
ENSMUSG00000059742	Kcnh7	potassium voltage-gated channel, subfamily H (eag-...	-0.5033	5.91857	5.41522	0.003137
ENSMUSG00000036501	Fam13b	family with sequence similarity 13, member B	-0.344	5.99324	5.64923	0.003142
ENSMUSG00000024644	Cndp2	CNDP dipeptidase 2	0.3327	5.71885	6.05153	0.003146
ENSMUSG00000027239	Mdk	midkine	0.553	3.99113	4.54414	0.00318
ENSMUSG00000040856	Dlk1	delta like non-canonical Notch ligand 1	-0.9064	4.08311	3.17673	0.003208
ENSMUSG00000032281	Acsbg1	acyl-CoA synthetase bubblegum family member 1	0.27	7.30453	7.57455	0.003208
ENSMUSG00000035933	Cog5	component of oligomeric golgi complex 5	-0.5228	4.9263	4.40353	0.003211
ENSMUSG00000103310	Pcdha12	protocadherin alpha 12	-0.2631	6.82355	6.56041	0.003216
ENSMUSG00000029404	Arl6ip4	ADP-ribosylation factor-like 6 interacting protein...	0.3726	5.26712	5.63975	0.003236
ENSMUSG00000034007	Scaper	S phase cyclin A-associated protein in the ER	-0.4302	5.38602	4.95586	0.00326
ENSMUSG00000018446	C1qbp	complement component 1, q subcomponent binding pro...	0.3601	5.51951	5.87962	0.00326
ENSMUSG00000040022	Rab11fip2	RAB11 family interacting protein 2 (class I)	-0.3327	6.08559	5.75285	0.00335
ENSMUSG00000028070	Naxe	NAD(P)HX epimerase	0.3475	5.51658	5.86406	0.003377
ENSMUSG00000038880	Mrps34	mitochondrial ribosomal protein S34	0.3531	5.52436	5.8775	0.003407
ENSMUSG00000034724	Cnot6l	CCR4-NOT transcription complex, subunit 6-like	-0.3929	5.57757	5.18471	0.003417
ENSMUSG00000028278	Rragd	Ras-related GTP binding D	-0.294	6.71186	6.41788	0.003434
ENSMUSG00000027598	Itch	itchy, E3 ubiquitin protein ligase	-0.3299	6.06309	5.73318	0.003456
ENSMUSG00000042541	Sem1	SEM1, 26S proteasome complex subunit	0.3919	5.1487	5.54056	0.003462
ENSMUSG00000046330	Rpl37a	ribosomal protein L37a	0.3784	6.10695	6.48539	0.00349
ENSMUSG00000043252	Tmem64	transmembrane protein 64	-0.4281	5.34073	4.91259	0.003505
ENSMUSG00000024935	Slc1a1	solute carrier family 1 (neuronal/epithelial high ...	-0.2115	7.4701	7.25864	0.003529
ENSMUSG00000037876	Jmjd1c	jumonji domain containing 1C	-0.2561	6.81909	6.56301	0.003549
ENSMUSG00000060961	Slc4a4	solute carrier family 4 (anion exchanger), member ...	-0.2889	7.62306	7.33414	0.003595
ENSMUSG00000022629	Kif21a	kinesin family member 21A	-0.1954	7.79152	7.59616	0.003615
ENSMUSG00000059173	Pde1a	phosphodiesterase 1A, calmodulin-dependent	-0.4717	7.63046	7.15873	0.003617
ENSMUSG00000036202	Rif1	replication timing regulatory factor 1	-0.4813	5.01884	4.53752	0.00362
ENSMUSG00000030786	Itgam	integrin alpha M	0.4288	4.93782	5.36661	0.003659
ENSMUSG00000031189	Aff2	AF4/FMR2 family, member 2	-0.852	3.39966	2.54767	0.003667
ENSMUSG00000026014	Raph1	Ras association (RalGDS/AF-6) and pleckstrin homol...	-0.356	5.91518	5.55919	0.003684
ENSMUSG00000020153	Ndufs7	NADH:ubiquinone oxidoreductase core subunit S7	0.3027	6.0631	6.36577	0.003684
ENSMUSG00000028842	Ago3	argonaute RISC catalytic subunit 3	-0.3024	6.28068	5.97828	0.003689
ENSMUSG00000009555	Cdk9	cyclin dependent kinase 9	0.2658	6.44214	6.70797	0.003689
ENSMUSG00000022574	Naprt	nicotinate phosphoribosyltransferase	0.6632	3.28942	3.95263	0.003703
ENSMUSG00000028416	Bag1	BCL2-associated athanogene 1	0.2686	6.52236	6.79096	0.003751
ENSMUSG00000032966	Fkbp1a	FK506 binding protein 1a	0.1685	9.02622	9.19468	0.003755
ENSMUSG00000037071	Scd1	stearoyl-Coenzyme A desaturase 1	-0.4816	7.70117	7.21956	0.003761
ENSMUSG00000034912	Mdga2	MAM domain containing glycosylphosphatidylinositol...	-0.5049	4.81196	4.30706	0.003763
ENSMUSG00000031343	Gabra3	gamma-aminobutyric acid type A receptor subunit al...	-0.4001	6.29695	5.89689	0.003768
ENSMUSG00000027674	Pex5l	peroxisomal biogenesis factor 5-like	-0.2391	7.86249	7.62341	0.003782
ENSMUSG00000040824	Snrpd2	small nuclear ribonucleoprotein D2	0.3917	5.14405	5.53573	0.003795
ENSMUSG00000028452	Vcp	valosin containing protein	0.1642	7.89847	8.06267	0.003796
ENSMUSG00000040659	Efhd2	EF hand domain containing 2	0.277	7.32352	7.60053	0.003836
ENSMUSG00000024491	Rbm27	RNA binding motif protein 27	-0.4	5.51899	5.11896	0.003837
ENSMUSG00000026469	Xpr1	xenotropic and polytropic retrovirus receptor 1	-0.2323	7.11154	6.87924	0.003838
ENSMUSG00000024339	Tap2	transporter 2, ATP-binding cassette, sub-family B ...	0.5653	3.9255	4.4908	0.003867
ENSMUSG00000026305	Lrrfip1	leucine rich repeat (in FLII) interacting protein ...	0.2683	6.37817	6.64645	0.003893
ENSMUSG00000028020	Glrb	glycine receptor, beta subunit	-0.2463	7.17294	6.92664	0.003901
ENSMUSG00000036309	Skp1	S-phase kinase-associated protein 1	0.1529	8.22356	8.37651	0.003902
ENSMUSG00000041014	Nrg3	neuregulin 3	-0.4269	5.3382	4.91128	0.003908
ENSMUSG00000020440	Arf5	ADP-ribosylation factor 5	0.2617	6.4792	6.74087	0.003908
ENSMUSG00000008730	Hipk1	homeodomain interacting protein kinase 1	-0.2261	7.23301	7.00694	0.003908
ENSMUSG00000048895	Cdk5r1	cyclin dependent kinase 5, regulatory subunit 1	-0.188	7.8077	7.61974	0.003908
ENSMUSG00000035152	Ap2b1	adaptor-related protein complex 2, beta 1 subunit	-0.1528	8.92198	8.76921	0.003921
ENSMUSG00000021339	Mrs2	MRS2 magnesium transporter	-0.5171	4.73351	4.21642	0.003929
ENSMUSG00000028480	Glipr2	GLI pathogenesis-related 2	0.8646	2.33194	3.1965	0.003963
ENSMUSG00000060550	H2-Q7	histocompatibility 2, Q region locus 7	1.06	1.55829	2.61784	0.003978
ENSMUSG00000060212	Pcnx2	pecanex homolog 2	-0.2485	6.94616	6.69762	0.003999
ENSMUSG00000074909	Ranbp6	RAN binding protein 6	-0.3956	5.5549	5.1593	0.004054
ENSMUSG00000051726	Kcnf1	potassium voltage-gated channel, subfamily F, memb...	-0.3508	6.38621	6.03545	0.004066
ENSMUSG00000006651	Aplp1	amyloid beta precursor like protein 1	0.1077	10.3279	10.4357	0.00407
ENSMUSG00000037989	Wnk2	WNK lysine deficient protein kinase 2	-0.2113	7.38392	7.17265	0.004073
ENSMUSG00000042444	Mindy2	MINDY lysine 48 deubiquitinase 2	-0.3009	6.31878	6.01792	0.004085
ENSMUSG00000027562	Car2	carbonic anhydrase 2	0.3314	7.55816	7.88959	0.004089
ENSMUSG00000061132	Blnk	B cell linker	0.8296	2.79835	3.62794	0.004104
ENSMUSG00000019889	Ptprk	protein tyrosine phosphatase receptor type K	-0.3722	5.87883	5.50666	0.004144
ENSMUSG00000001847	Rac1	Rac family small GTPase 1	0.1467	8.20562	8.35234	0.004164
ENSMUSG00000034789	Rab24	RAB24, member RAS oncogene family	0.3485	5.47232	5.82078	0.004192
ENSMUSG00000026796	Niban2	niban apoptosis regulator 2	0.3783	5.25194	5.63024	0.004206
ENSMUSG00000031812	Map1lc3b	microtubule-associated protein 1 light chain 3 bet...	0.1998	7.42412	7.62394	0.00421
ENSMUSG00000029328	Hnrnpdl	heterogeneous nuclear ribonucleoprotein D-like	0.17	7.86151	8.03149	0.00421
ENSMUSG00000021051	Ppp2r5e	protein phosphatase 2, regulatory subunit B', epsi...	-0.276	6.54162	6.26558	0.00422
ENSMUSG00000063894	Zkscan8	zinc finger with KRAB and SCAN domains 8	-0.4889	4.83505	4.34616	0.004225
ENSMUSG00000037475	Thoc2	THO complex 2	-0.3626	5.78123	5.41858	0.004258
ENSMUSG00000029135	Fosl2	fos-like antigen 2	-0.4534	5.86059	5.40714	0.004264
ENSMUSG00000036469	Marchf1	membrane associated ring-CH-type finger 1	-0.4472	5.19115	4.74398	0.004272
ENSMUSG00000104252	Pcdha4	protocadherin alpha 4	-0.2588	6.80981	6.55098	0.004288
ENSMUSG00000013858	Tmem259	transmembrane protein 259	0.2447	6.64264	6.88734	0.004288
ENSMUSG00000025862	Stag2	STAG2 cohesin complex component	-0.3194	6.08272	5.76327	0.004295
ENSMUSG00000036181	H1f2	H1.2 linker histone, cluster member	0.4912	4.33282	4.82398	0.004354
ENSMUSG00000004113	Cacna1b	calcium channel, voltage-dependent, N type, alpha ...	-0.2361	7.24078	7.0047	0.004354
ENSMUSG00000063663	Brwd3	bromodomain and WD repeat domain containing 3	-0.6657	3.92353	3.25783	0.004356
ENSMUSG00000045608	Dbx2	developing brain homeobox 2	0.4973	4.31068	4.80798	0.004359
ENSMUSG00000002274	Metrn	meteorin, glial cell differentiation regulator	0.3962	5.18563	5.58182	0.004368
ENSMUSG00000053774	Ubxn7	UBX domain protein 7	-0.3578	5.7129	5.35506	0.004368
ENSMUSG00000015733	Capza2	capping actin protein of muscle Z-line subunit alp...	-0.2256	7.87047	7.64485	0.004368
ENSMUSG00000000567	Sox9	SRY (sex determining region Y)-box 9	0.3727	5.24887	5.62152	0.004385
ENSMUSG00000039967	Zfp292	zinc finger protein 292	-0.3816	5.61406	5.23244	0.004413
ENSMUSG00000050192	Eif5a2	eukaryotic translation initiation factor 5A2	-0.3606	5.70283	5.34221	0.004473
ENSMUSG00000027438	Napb	N-ethylmaleimide sensitive fusion protein attachme...	-0.1436	9.17566	9.03208	0.004473
ENSMUSG00000045284	Dcaf12l1	DDB1 and CUL4 associated factor 12-like 1	-0.3857	5.62333	5.23759	0.004483
ENSMUSG00000063434	Sorcs3	sortilin-related VPS10 domain containing receptor ...	-0.3811	5.66735	5.28623	0.004483
ENSMUSG00000009549	Srp14	signal recognition particle 14	0.2906	6.04201	6.33261	0.004488
ENSMUSG00000060216	Arrb2	arrestin, beta 2	0.295	6.01353	6.30855	0.00449
ENSMUSG00000027455	Nsfl1c	NSFL1 (p97) cofactor (p47)	0.262	6.41226	6.67424	0.00449
ENSMUSG00000033569	Adgrb3	adhesion G protein-coupled receptor B3	-0.2403	6.95811	6.71781	0.004525
ENSMUSG00000025551	Fgf14	fibroblast growth factor 14	-0.4736	4.91546	4.44186	0.004529
ENSMUSG00000029598	Plbd2	phospholipase B domain containing 2	0.2448	6.58635	6.83117	0.004534
ENSMUSG00000034116	Vav1	vav 1 oncogene	0.8197	2.75914	3.57885	0.004558
ENSMUSG00000023007	Prpf40b	pre-mRNA processing factor 40B	0.241	6.614	6.855	0.004575
ENSMUSG00000053158	Fes	feline sarcoma oncogene	0.7841	2.63664	3.42078	0.004577
ENSMUSG00000090122	Kcne5	potassium voltage-gated channel subfamily E regula...	0.7829	2.63007	3.41295	0.004577
ENSMUSG00000034353	Ramp1	receptor (calcitonin) activity modifying protein 1	0.3164	5.77297	6.08935	0.004605
ENSMUSG00000056771	Gm10010	predicted gene 10010	-0.9612	2.849	1.88784	0.004618
ENSMUSG00000021983	Atp8a2	ATPase, aminophospholipid transporter-like, class ...	-0.6372	4.21962	3.58246	0.004618
ENSMUSG00000030759	Far1	fatty acyl CoA reductase 1	-0.2814	6.49076	6.20932	0.004624
ENSMUSG00000048277	Syngr2	synaptogyrin 2	0.6067	3.62286	4.22955	0.004667
ENSMUSG00000042046	Dstyk	dual serine/threonine and tyrosine protein kinase	-0.2887	6.31667	6.02799	0.004668
ENSMUSG00000021728	Emb	embigin	-0.4824	4.95811	4.47573	0.00467
ENSMUSG00000056596	Trnp1	TMF1-regulated nuclear protein 1	0.2786	6.70401	6.98262	0.004671
ENSMUSG00000037601	Nme1	NME/NM23 nucleoside diphosphate kinase 1	0.2372	6.69553	6.93276	0.004674
ENSMUSG00000013593	Ndufs2	NADH:ubiquinone oxidoreductase core subunit S2	0.199	7.52715	7.72619	0.004683
ENSMUSG00000025234	Arih1	ariadne RBR E3 ubiquitin protein ligase 1	-0.2691	6.65254	6.38346	0.004699
ENSMUSG00000030350	Prmt8	protein arginine N-methyltransferase 8	-0.3512	6.10053	5.74934	0.004753
ENSMUSG00000003873	Bax	BCL2-associated X protein	0.4024	5.0385	5.44086	0.00476
ENSMUSG00000024646	Cyb5a	cytochrome b5 type A (microsomal)	0.3892	5.10825	5.49741	0.004806
ENSMUSG00000040713	Creg1	cellular repressor of E1A-stimulated genes 1	0.4144	4.95759	5.37197	0.004819
ENSMUSG00000006818	Sod2	superoxide dismutase 2, mitochondrial	-0.2296	7.05438	6.82483	0.004848
ENSMUSG00000056755	Grm7	glutamate receptor, metabotropic 7	-0.3536	5.85324	5.49968	0.004859
ENSMUSG00000058248	Kcnh1	potassium voltage-gated channel, subfamily H (eag-...	-0.3645	5.87411	5.50961	0.004896
ENSMUSG00000021037	Ahsa1	AHA1, activator of heat shock protein ATPase 1	0.2325	6.76604	6.99857	0.004917
ENSMUSG00000022841	Ap2m1	adaptor-related protein complex 2, mu 1 subunit	0.1482	8.16773	8.31588	0.004918
ENSMUSG00000005371	Fbxo11	F-box protein 11	-0.2253	7.10523	6.87996	0.00493
ENSMUSG00000020850	Prpf8	pre-mRNA processing factor 8	-0.1665	8.08949	7.92297	0.004948
ENSMUSG00000066026	Dhrs3	dehydrogenase/reductase 3	0.496	4.26845	4.7645	0.00495
ENSMUSG00000028328	Tmod1	tropomodulin 1	0.3501	5.56799	5.91812	0.00495
ENSMUSG00000103770	Pcdha9	protocadherin alpha 9	-0.2576	6.79344	6.53583	0.004959
ENSMUSG00000028932	Psmc2	proteasome (prosome, macropain) 26S subunit, ATPas...	0.2464	6.57015	6.81654	0.00496
ENSMUSG00000055850	Rnf181	ring finger protein 181	0.3048	5.86875	6.17358	0.004966
ENSMUSG00000002233	Rhoc	ras homolog family member C	0.5962	3.77667	4.37286	0.004977
ENSMUSG00000040249	Lrp1	low density lipoprotein receptor-related protein 1	-0.1613	9.27651	9.11522	0.004987
ENSMUSG00000038013	Wipf2	WAS/WASL interacting protein family, member 2	-0.2391	6.91133	6.67227	0.004995
ENSMUSG00000037815	Ctnna1	catenin alpha 1	0.2904	6.25417	6.5446	0.005028
ENSMUSG00000024949	Sf1	splicing factor 1	0.174	7.65442	7.8284	0.005029
ENSMUSG00000050608	Micos10	mitochondrial contact site and cristae organizing ...	0.3084	5.89144	6.19985	0.005132
ENSMUSG00000036499	Eea1	early endosome antigen 1	-0.3403	5.94571	5.60545	0.005134
ENSMUSG00000042423	Fbrs	fibrosin	0.3104	5.77273	6.08308	0.005135
ENSMUSG00000026977	Marchf7	membrane associated ring-CH-type finger 7	-0.3485	5.81214	5.46361	0.005157
ENSMUSG00000032375	Aph1b	aph1 homolog B, gamma secretase subunit	-0.4326	5.1861	4.75354	0.005209
ENSMUSG00000045038	Prkce	protein kinase C, epsilon	-0.2886	9.50897	9.22039	0.005234
ENSMUSG00000018865	Sult4a1	sulfotransferase family 4A, member 1	0.1536	8.66774	8.82134	0.005241
ENSMUSG00000032372	Plscr2	phospholipid scramblase 2	0.9399	2.05454	2.99448	0.005258
ENSMUSG00000017418	Arl5b	ADP-ribosylation factor-like 5B	-0.5004	4.77338	4.27296	0.00528
ENSMUSG00000020022	Ndufa12	NADH:ubiquinone oxidoreductase subunit A12	0.2724	6.31282	6.58524	0.00528
ENSMUSG00000002379	Ndufa11	NADH:ubiquinone oxidoreductase subunit A11	0.3135	5.84861	6.16208	0.005297
ENSMUSG00000023456	Tpi1	triosephosphate isomerase 1	0.1431	8.98745	9.13053	0.005316
ENSMUSG00000015476	Prrt1	proline-rich transmembrane protein 1	0.2546	8.06106	8.31563	0.005317
ENSMUSG00000031875	Cmtm3	CKLF-like MARVEL transmembrane domain containing 3	0.6261	3.4386	4.06473	0.00534
ENSMUSG00000060376	Bckdha	branched chain ketoacid dehydrogenase E1, alpha po...	0.3492	5.36415	5.71338	0.005355
ENSMUSG00000032356	Rasgrf1	RAS protein-specific guanine nucleotide-releasing ...	-0.1542	9.50691	9.35275	0.005393
ENSMUSG00000066324	Bpnt2	3'(2'), 5'-bisphosphate nucleotidase 2	-0.2551	6.73502	6.47995	0.005394
ENSMUSG00000030062	Rpn1	ribophorin I	0.2053	7.10884	7.31413	0.005394
ENSMUSG00000066415	Msl2	MSL complex subunit 2	-0.336	5.81545	5.47944	0.005396
ENSMUSG00000000563	Atp5pb	ATP synthase peripheral stalk-membrane subunit b	0.1808	7.67808	7.8589	0.0054
ENSMUSG00000055320	Tead1	TEA domain family member 1	-0.4037	5.43061	5.02689	0.005411
ENSMUSG00000034653	Ythdc2	YTH domain containing 2	-0.4347	5.18894	4.7542	0.005436
ENSMUSG00000019359	Gdpd2	glycerophosphodiester phosphodiesterase domain con...	0.5995	3.73459	4.3341	0.005439
ENSMUSG00000038729	Pakap	paralemmin A kinase anchor protein	-0.2746	6.68177	6.40713	0.00544
ENSMUSG00000021549	Rasa1	RAS p21 protein activator 1	-0.3263	6.03783	5.7115	0.005457
ENSMUSG00000022008	Gpalpp1	GPALPP motifs containing 1	-0.3549	5.70678	5.35184	0.005458
ENSMUSG00000044067	Gpr22	G protein-coupled receptor 22	-0.3876	6.41589	6.02831	0.005468
ENSMUSG00000052298	Cdc42se2	CDC42 small effector 2	-0.2143	7.58295	7.36862	0.005481
ENSMUSG00000039741	Bahcc1	BAH domain and coiled-coil containing 1	-0.4034	5.34513	4.94169	0.005485
ENSMUSG00000103707	Pcdha6	protocadherin alpha 6	-0.2508	6.78196	6.53113	0.005555
ENSMUSG00000036257	Pnpla8	patatin-like phospholipase domain containing 8	-0.2679	6.52414	6.25624	0.00558
ENSMUSG00000056116	H2-T22	histocompatibility 2, T region locus 22	0.4635	4.43904	4.90249	0.005613
ENSMUSG00000037060	Cavin3	caveolae associated 3	0.5466	3.89412	4.44068	0.005624
ENSMUSG00000031503	Col4a2	collagen, type IV, alpha 2	0.2529	6.48324	6.73612	0.005627
ENSMUSG00000021876	Rnase4	ribonuclease, RNase A family 4	0.4966	4.17086	4.66746	0.00565
ENSMUSG00000019710	Mrpl24	mitochondrial ribosomal protein L24	0.3601	5.33506	5.69521	0.005669
ENSMUSG00000029714	Gigyf1	GRB10 interacting GYF protein 1	0.2336	6.68588	6.91952	0.005711
ENSMUSG00000009470	Tnpo1	transportin 1	-0.3118	6.07781	5.76597	0.005712
ENSMUSG00000030213	Atf7ip	activating transcription factor 7 interacting prot...	-0.2539	6.68951	6.43558	0.005721
ENSMUSG00000032118	Fez1	fasciculation and elongation protein zeta 1	0.1698	7.77402	7.94386	0.005721
ENSMUSG00000017167	Cntnap1	contactin associated protein-like 1	-0.1604	8.25163	8.0912	0.005721
ENSMUSG00000052456	Get3	guided entry of tail-anchored proteins factor 3, A...	0.2714	6.22863	6.49999	0.005723
ENSMUSG00000047842	Diras2	DIRAS family, GTP-binding RAS-like 2	-0.1869	8.35743	8.1705	0.005728
ENSMUSG00000037503	Fam168b	family with sequence similarity 168, member B	-0.1502	8.29386	8.14367	0.005732
ENSMUSG00000031157	Pqbp1	polyglutamine binding protein 1	0.286	5.98199	6.268	0.005746
ENSMUSG00000025823	Pdia4	protein disulfide isomerase associated 4	0.3307	5.65144	5.98213	0.005764
ENSMUSG00000103255	Pcdhac1	protocadherin alpha subfamily C, 1	-0.2527	6.78781	6.5351	0.005766
ENSMUSG00000032932	Hspa13	heat shock protein 70 family, member 13	-0.4034	5.37294	4.96953	0.005807
ENSMUSG00000068917	Clk2	CDC-like kinase 2	0.3271	5.55286	5.87993	0.005807
ENSMUSG00000023170	Gps2	G protein pathway suppressor 2	0.4282	4.7291	5.15728	0.005813
ENSMUSG00000044037	Als2cl	ALS2 C-terminal like	0.4989	4.14104	4.63992	0.005839
ENSMUSG00000067028	Cntnap5b	contactin associated protein-like 5B	-0.8254	3.33943	2.51406	0.005842
ENSMUSG00000072872	Rybp	RING1 and YY1 binding protein	-0.488	4.79495	4.30693	0.005842
ENSMUSG00000090061	Nwd2	NACHT and WD repeat domain containing 2	-0.4608	5.37704	4.9162	0.005842
ENSMUSG00000092534	Pagr1b	PAXIP1 associated glutamate rich protein 1B	0.4062	4.88489	5.29108	0.005842
ENSMUSG00000006301	Tmbim1	transmembrane BAX inhibitor motif containing 1	0.36	5.36023	5.72024	0.005842
ENSMUSG00000055675	Kbtbd11	kelch repeat and BTB (POZ) domain containing 11	-0.3828	7.85366	7.4709	0.005858
ENSMUSG00000040663	Clcf1	cardiotrophin-like cytokine factor 1	0.9672	1.69799	2.66521	0.005865
ENSMUSG00000049076	Acap2	ArfGAP with coiled-coil, ankyrin repeat and PH dom...	-0.2308	7.17483	6.94399	0.005865
ENSMUSG00000078771	Evi2a	ecotropic viral integration site 2a	0.438	4.82749	5.26547	0.00588
ENSMUSG00000037916	Ndufv1	NADH:ubiquinone oxidoreductase core subunit V1	0.1966	7.22734	7.42397	0.005893
ENSMUSG00000024309	Pfdn6	prefoldin subunit 6	0.3585	5.27339	5.63189	0.005914
ENSMUSG00000052949	Rnf157	ring finger protein 157	-0.1582	8.51209	8.35385	0.005918
ENSMUSG00000076441	Ass1	argininosuccinate synthetase 1	0.417	5.00522	5.42219	0.00597
ENSMUSG00000027706	Sec62	SEC62 homolog, preprotein translocation	0.1971	7.33389	7.53101	0.005971
ENSMUSG00000023025	Larp4	La ribonucleoprotein 4	-0.3821	5.47945	5.09736	0.005986
ENSMUSG00000078853	Igtp	interferon gamma induced GTPase	0.8074	2.47155	3.27895	0.006
ENSMUSG00000031387	Renbp	renin binding protein	0.8025	2.46467	3.26716	0.006
ENSMUSG00000035048	Anapc13	anaphase promoting complex subunit 13	0.4686	4.37501	4.8436	0.006034
ENSMUSG00000007880	Arid1a	AT-rich interaction domain 1A	-0.1993	7.38996	7.19069	0.006063
ENSMUSG00000030824	Nucb1	nucleobindin 1	0.2563	6.40791	6.66425	0.006068
ENSMUSG00000055024	Ep300	E1A binding protein p300	-0.2668	6.58669	6.31992	0.006071
ENSMUSG00000021708	Rasgrf2	RAS protein-specific guanine nucleotide-releasing ...	-0.2391	6.88269	6.64364	0.006077
ENSMUSG00000003038	Hmgn2	high mobility group nucleosomal binding domain 2	0.3112	5.92377	6.23496	0.006144
ENSMUSG00000015790	Surf1	surfeit gene 1	0.3305	5.63544	5.96592	0.006155
ENSMUSG00000018481	Appbp2	amyloid beta precursor protein binding protein 2	-0.256	6.66556	6.40952	0.006182
ENSMUSG00000003660	Snrnp200	small nuclear ribonucleoprotein 200 (U5)	-0.2068	7.30525	7.09841	0.006197
ENSMUSG00000046756	Mrps7	mitchondrial ribosomal protein S7	0.3564	5.29763	5.65405	0.006213
ENSMUSG00000031059	Ndufb11	NADH:ubiquinone oxidoreductase subunit B11	0.2754	6.17368	6.44913	0.006218
ENSMUSG00000029472	Anapc5	anaphase-promoting complex subunit 5	0.1719	7.58941	7.76126	0.006218
ENSMUSG00000038760	Trhr	thyrotropin releasing hormone receptor	-0.8654	2.79205	1.9267	0.006232
ENSMUSG00000040537	Adam22	a disintegrin and metallopeptidase domain 22	-0.1754	7.83383	7.65847	0.006248
ENSMUSG00000044167	Foxo1	forkhead box O1	-0.368	5.69064	5.3226	0.00625
ENSMUSG00000032737	Inppl1	inositol polyphosphate phosphatase-like 1	0.359	5.23869	5.59773	0.00625
ENSMUSG00000024511	Rab27b	RAB27B, member RAS oncogene family	-0.4003	5.39413	4.99383	0.006274
ENSMUSG00000029544	Cabp1	calcium binding protein 1	0.3017	6.02246	6.32415	0.006302
ENSMUSG00000020170	Frs2	fibroblast growth factor receptor substrate 2	-0.3192	6.06434	5.74511	0.006307
ENSMUSG00000102312	Pcdha3	protocadherin alpha 3	-0.2485	6.78142	6.53294	0.006312
ENSMUSG00000026361	Cdc73	cell division cycle 73, Paf1/RNA polymerase II com...	-0.3575	5.60712	5.24966	0.006335
ENSMUSG00000020142	Slc1a4	solute carrier family 1 (glutamate/neutral amino a...	0.2629	6.25129	6.5142	0.006335
ENSMUSG00000031166	Wdr13	WD repeat domain 13	-0.1691	8.00108	7.83196	0.006335
ENSMUSG00000017778	Cox7c	cytochrome c oxidase subunit 7C	0.2983	5.91283	6.21108	0.00634
ENSMUSG00000072294	Klf12	Kruppel-like transcription factor 12	-0.9211	3.04144	2.1203	0.006363
ENSMUSG00000032373	Car12	carbonic anhydrase 12	-0.8386	5.63922	4.80065	0.006439
ENSMUSG00000029994	Anxa4	annexin A4	0.7146	2.86778	3.58233	0.006442
[truncated: 15,878 more rows]

## Sheet: Hipp.Bulk_PS19_P2rx7KO vs PS19
Hippocampus bulk-RNA-seq -DEA PS19/P2rx7KO vs PS19, related to Extended Data Fig. 2b
feature	symbol	gene_title	logFC	AveExprPS19	AveExprPS19/P2rx7KO	meta.q
ENSMUSG00000030789	Itgax	integrin alpha X	-2.806	4.63964	1.83327	3.962e-14
ENSMUSG00000018774	Cd68	CD68 antigen	-1.431	5.63246	4.20163	6.098e-12
ENSMUSG00000073418	C4b	complement C4B (Chido blood group)	-1.804	8.97664	7.1731	2.425e-11
ENSMUSG00000037686	Aspg	asparaginase	-1.61	4.80152	3.19129	5.355e-11
ENSMUSG00000023992	Trem2	triggering receptor expressed on myeloid cells 2	-1.36	6.05527	4.69492	2.099e-10
ENSMUSG00000030579	Tyrobp	TYRO protein tyrosine kinase binding protein	-1.322	5.86074	4.53875	2.099e-10
ENSMUSG00000020932	Gfap	glial fibrillary acidic protein	-1.576	11.2823	9.70665	3.341e-10
ENSMUSG00000021091	Serpina3n	serine (or cysteine) peptidase inhibitor, clade A,...	-1.89	8.12791	6.23786	3.923e-10
ENSMUSG00000014599	Csf1	colony stimulating factor 1 (macrophage)	-0.8774	6.29866	5.42127	5.731e-10
ENSMUSG00000030124	Lag3	lymphocyte-activation gene 3	-1.679	5.70595	4.02677	5.75e-10
ENSMUSG00000059336	Slc14a1	solute carrier family 14 (urea transporter), membe...	-1.04	5.79414	4.75378	5.75e-10
ENSMUSG00000029580	Actb	actin, beta	-0.4158	10.6478	10.2319	6.098e-10
ENSMUSG00000067586	S1pr3	sphingosine-1-phosphate receptor 3	-1.481	5.23683	3.75602	3.099e-09
ENSMUSG00000036887	C1qa	complement component 1, q subcomponent, alpha poly...	-1.523	8.06559	6.54305	3.623e-09
ENSMUSG00000016256	Ctsz	cathepsin Z	-1.175	7.13128	5.95592	3.706e-09
ENSMUSG00000028859	Csf3r	colony stimulating factor 3 receptor	-1.212	5.12999	3.91834	4.264e-09
ENSMUSG00000030342	Cd9	CD9 antigen	-1.06	7.03478	5.9747	5.053e-09
ENSMUSG00000021423	Ly86	lymphocyte antigen 86	-1.308	5.52499	4.21677	6.625e-09
ENSMUSG00000022146	Osmr	oncostatin M receptor	-1.717	5.02165	3.30422	1.931e-08
ENSMUSG00000034708	Grn	granulin	-0.8453	7.31638	6.47106	2.205e-08
ENSMUSG00000036908	Unc93b1	unc-93 homolog B1, TLR signaling regulator	-0.9478	5.57714	4.62939	3.191e-08
ENSMUSG00000036896	C1qc	complement component 1, q subcomponent, C chain	-1.362	7.6479	6.28601	3.491e-08
ENSMUSG00000001025	S100a6	S100 calcium binding protein A6 (calcyclin)	-1.183	4.9976	3.81458	3.494e-08
ENSMUSG00000022037	Clu	clusterin	-0.5939	10.9596	10.3657	3.83e-08
ENSMUSG00000064246	Chi3l1	chitinase 3 like 1	-1.187	5.62739	4.4404	4.349e-08
ENSMUSG00000007891	Ctsd	cathepsin D	-0.9811	10.0635	9.08232	4.432e-08
ENSMUSG00000036905	C1qb	complement component 1, q subcomponent, beta polyp...	-1.324	7.6789	6.35445	5.041e-08
ENSMUSG00000046805	Mpeg1	macrophage expressed gene 1	-1.292	6.67977	5.38733	5.14e-08
ENSMUSG00000036560	Lgi4	leucine-rich repeat LGI family, member 4	-0.6309	6.61503	5.98412	5.502e-08
ENSMUSG00000038642	Ctss	cathepsin S	-1.344	8.09026	6.74583	6.147e-08
ENSMUSG00000021665	Hexb	hexosaminidase B	-0.8667	7.91036	7.04368	6.159e-08
ENSMUSG00000002602	Axl	AXL receptor tyrosine kinase	-0.7152	6.76265	6.04747	6.895e-08
ENSMUSG00000026728	Vim	vimentin	-1.724	8.05662	6.33221	7.319e-08
ENSMUSG00000029622	Arpc1b	actin related protein 2/3 complex, subunit 1B	-0.9417	5.40567	4.46398	7.381e-08
ENSMUSG00000068129	Cst7	cystatin F (leukocystatin)	-2.323	3.81681	1.49357	7.582e-08
ENSMUSG00000022283	Pabpc1	poly(A) binding protein, cytoplasmic 1	-0.3585	7.90213	7.54364	1.28e-07
ENSMUSG00000031207	Msn	moesin	-0.8004	6.19808	5.39771	1.346e-07
ENSMUSG00000024610	Cd74	CD74 antigen (invariant polypeptide of major histo...	-3.24	7.0636	3.82312	1.499e-07
ENSMUSG00000017760	Ctsa	cathepsin A	-0.4826	7.66056	7.178	1.499e-07
ENSMUSG00000069516	Lyz2	lysozyme 2	-2.154	6.16385	4.01027	1.825e-07
ENSMUSG00000053931	Cnn3	calponin 3, acidic	-0.6976	7.57162	6.874	2.786e-07
ENSMUSG00000034926	Dhcr24	24-dehydrocholesterol reductase	0.566	5.99192	6.55797	2.968e-07
ENSMUSG00000024164	C3	complement component 3	-1.926	4.83377	2.90769	3.407e-07
ENSMUSG00000058715	Fcer1g	Fc receptor, IgE, high affinity I, gamma polypepti...	-1.082	4.95848	3.87619	3.47e-07
ENSMUSG00000031762	Mt2	metallothionein 2	-0.9747	8.42835	7.45367	3.648e-07
ENSMUSG00000059498	Fcgr3	Fc receptor, IgG, low affinity III	-0.9401	5.25126	4.31114	4.353e-07
ENSMUSG00000026656	Fcgr2b	Fc receptor, IgG, low affinity IIb	-1.416	4.36536	2.94969	4.561e-07
ENSMUSG00000021477	Ctsl	cathepsin L	-0.5909	7.27677	6.68591	4.772e-07
ENSMUSG00000005087	Cd44	CD44 antigen	-1.395	4.38946	2.99406	5.434e-07
ENSMUSG00000041515	Irf8	interferon regulatory factor 8	-1.206	4.63126	3.42508	5.568e-07
ENSMUSG00000025351	Cd63	CD63 antigen	-0.8512	7.0074	6.15624	6.793e-07
ENSMUSG00000032181	Scg3	secretogranin III	-0.4396	8.76912	8.32952	8.019e-07
ENSMUSG00000052336	Cx3cr1	C-X3-C motif chemokine receptor 1	-0.7743	6.78524	6.01095	8.268e-07
ENSMUSG00000028583	Pdpn	podoplanin	-0.9727	5.34025	4.36759	8.795e-07
ENSMUSG00000025232	Hexa	hexosaminidase A	-0.5333	6.59431	6.06105	9.327e-07
ENSMUSG00000029810	Tmem176b	transmembrane protein 176B	-0.6624	6.0784	5.41599	1.094e-06
ENSMUSG00000035778	Ggta1	glycoprotein galactosyltransferase alpha 1, 3	-1.294	4.43539	3.1414	1.512e-06
ENSMUSG00000000290	Itgb2	integrin beta 2	-1.172	4.56108	3.38909	1.648e-06
ENSMUSG00000025026	Add3	adducin 3	-0.5438	7.76598	7.22218	1.873e-06
ENSMUSG00000000682	Cd52	CD52 antigen	-1.677	3.90964	2.2328	2.01e-06
ENSMUSG00000002985	Apoe	apolipoprotein E	-0.6914	11.9281	11.2367	2.327e-06
ENSMUSG00000020120	Plek	pleckstrin	-0.8738	5.17524	4.30145	3.991e-06
ENSMUSG00000073421	H2-Ab1	histocompatibility 2, class II antigen A, beta 1	-2.376	4.69016	2.31447	4.024e-06
ENSMUSG00000022817	Itgb5	integrin beta 5	-0.6883	6.76841	6.08014	4.198e-06
ENSMUSG00000021939	Ctsb	cathepsin B	-0.5253	9.9727	9.44744	4.198e-06
ENSMUSG00000015243	Abca1	ATP-binding cassette, sub-family A member 1	-0.9409	6.22376	5.28288	4.639e-06
ENSMUSG00000026177	Slc11a1	solute carrier family 11 (proton-coupled divalent ...	-1.487	3.93204	2.44499	5.092e-06
ENSMUSG00000062760	Shisal1	shisa like 1	0.5493	5.99157	6.54085	5.607e-06
ENSMUSG00000021702	Thbs4	thrombospondin 4	-1.231	5.38124	4.1507	5.941e-06
ENSMUSG00000035673	Sbno2	strawberry notch 2	-0.7176	5.63484	4.91728	5.964e-06
ENSMUSG00000036594	H2-Aa	histocompatibility 2, class II antigen A, alpha	-2.701	5.0904	2.38988	6.203e-06
ENSMUSG00000006800	Sulf2	sulfatase 2	-0.3851	7.50933	7.12425	7.339e-06
ENSMUSG00000028581	Laptm5	lysosomal-associated protein transmembrane 5	-0.7848	6.79273	6.00795	9.251e-06
ENSMUSG00000026701	Prdx6	peroxiredoxin 6	-0.6924	8.85901	8.16663	9.415e-06
ENSMUSG00000060802	B2m	beta-2 microglobulin	-1.127	8.03956	6.91278	1.056e-05
ENSMUSG00000036570	Fxyd1	FXYD domain-containing ion transport regulator 1	-0.9706	7.0242	6.05358	1.258e-05
ENSMUSG00000042613	Pbxip1	pre B cell leukemia transcription factor interacti...	-0.6334	7.20334	6.56997	1.489e-05
ENSMUSG00000024621	Csf1r	colony stimulating factor 1 receptor	-0.6788	7.50877	6.82998	1.869e-05
ENSMUSG00000031765	Mt1	metallothionein 1	-0.6794	8.94485	8.26542	1.907e-05
ENSMUSG00000052160	Pld4	phospholipase D family member 4	-0.9246	4.82841	3.90382	1.912e-05
ENSMUSG00000029304	Spp1	secreted phosphoprotein 1	-1.514	5.21709	3.70306	2.351e-05
ENSMUSG00000018927	Ccl6	C-C motif chemokine ligand 6	-1.527	3.67985	2.15276	2.365e-05
ENSMUSG00000030341	Tnfrsf1a	tumor necrosis factor receptor superfamily, member...	-0.9082	4.87752	3.96934	3.042e-05
ENSMUSG00000073411	H2-D1	histocompatibility 2, D region locus 1	-1.237	7.37464	6.13725	3.092e-05
ENSMUSG00000025283	Sat1	spermidine/spermine N1-acetyl transferase 1	-0.6352	6.24547	5.61029	3.347e-05
ENSMUSG00000005142	Man2b1	mannosidase 2, alpha B1	-0.5624	6.58885	6.02646	3.347e-05
ENSMUSG00000046879	Irgm1	immunity-related GTPase family M member 1	-0.9851	4.78676	3.80165	3.488e-05
ENSMUSG00000021998	Lcp1	lymphocyte cytosolic protein 1	-0.9611	4.76107	3.80001	3.653e-05
ENSMUSG00000040997	Abhd4	abhydrolase domain containing 4	-0.4435	6.95558	6.51212	3.79e-05
ENSMUSG00000060586	H2-Eb1	histocompatibility 2, class II antigen E beta	-2.142	4.5513	2.40921	3.939e-05
ENSMUSG00000018008	Cyth4	cytohesin 4	-0.753	5.34555	4.59258	4.326e-05
ENSMUSG00000032359	Ctsh	cathepsin H	-0.8648	4.88846	4.0237	5.988e-05
ENSMUSG00000008348	Ubc	ubiquitin C	-0.6257	6.13022	5.50456	7.652e-05
ENSMUSG00000037902	Sirpa	signal-regulatory protein alpha	-0.258	8.92424	8.66628	7.832e-05
ENSMUSG00000003657	Calb2	calbindin 2	1.558	4.80221	6.36015	7.833e-05
ENSMUSG00000030111	A2m	alpha-2-macroglobulin	-1.345	4.9813	3.63626	7.833e-05
ENSMUSG00000068699	Flnc	filamin C, gamma	-1.231	4.06644	2.835	7.99e-05
ENSMUSG00000029816	Gpnmb	glycoprotein (transmembrane) nmb	-1.264	4.60855	3.34447	8.638e-05
ENSMUSG00000037071	Scd1	stearoyl-Coenzyme A desaturase 1	0.7382	7.21956	7.95779	9.827e-05
ENSMUSG00000025555	Farp1	FERM, ARH/RhoGEF and pleckstrin domain protein 1	-0.4166	6.89578	6.47922	0.0001032
ENSMUSG00000040811	Eml2	echinoderm microtubule associated protein like 2	0.3026	7.58642	7.88899	0.0001149
ENSMUSG00000022488	Nckap1l	NCK associated protein 1 like	-0.7893	4.96096	4.17166	0.000115
ENSMUSG00000004040	Stat3	signal transducer and activator of transcription 3	-0.4739	6.33316	5.85925	0.0001167
ENSMUSG00000026879	Gsn	gelsolin	-0.6201	7.09637	6.47627	0.0001208
ENSMUSG00000074657	Kif5a	kinesin family member 5A	0.3856	10.6215	11.0071	0.0001467
ENSMUSG00000042066	Tmcc2	transmembrane and coiled-coil domains 2	0.2628	7.84015	8.10295	0.0001601
ENSMUSG00000025492	Ifitm3	interferon induced transmembrane protein 3	-1.052	5.06625	4.01392	0.0001616
ENSMUSG00000026185	Igfbp5	insulin-like growth factor binding protein 5	-0.5917	8.66549	8.07375	0.0001685
ENSMUSG00000031604	Msmo1	methylsterol monoxygenase 1	0.4861	5.72582	6.21189	0.0001748
ENSMUSG00000015852	Fcrl2	Fc receptor like 2	-0.7764	5.62823	4.85181	0.0001784
ENSMUSG00000085795	Zfp703	zinc finger protein 703	-0.5978	5.61349	5.01571	0.0002126
ENSMUSG00000033880	Lgals3bp	lectin, galactoside-binding, soluble, 3 binding pr...	-1.109	6.42493	5.31631	0.0002182
ENSMUSG00000027447	Cst3	cystatin C	-0.4349	10.7479	10.3129	0.0002226
ENSMUSG00000032562	Gnai2	G protein subunit alpha i2	-0.31	8.3319	8.02186	0.0002302
ENSMUSG00000026395	Ptprc	protein tyrosine phosphatase receptor type C	-1.217	3.94965	2.73253	0.0002315
ENSMUSG00000074622	Mafb	MAF bZIP transcription factor B	-0.7397	5.06911	4.32943	0.0002397
ENSMUSG00000032368	Zic1	zinc finger protein of the cerebellum 1	1.585	3.68456	5.26945	0.0002406
ENSMUSG00000022389	Tef	thyrotroph embryonic factor	0.2163	8.36164	8.57796	0.0002708
ENSMUSG00000079484	Phyhd1	phytanoyl-CoA dioxygenase domain containing 1	-0.607	5.6066	4.99955	0.000281
ENSMUSG00000036644	Tbc1d9b	TBC1 domain family, member 9B	0.252	7.8454	8.0974	0.00035
ENSMUSG00000028222	Calb1	calbindin 1	0.3899	6.3448	6.73471	0.0003868
ENSMUSG00000006519	Cyba	cytochrome b-245, alpha polypeptide	-0.9867	4.35765	3.37092	0.0003869
ENSMUSG00000027546	Atp9a	ATPase, class II, type 9A	0.1968	8.68632	8.88311	0.0003915
ENSMUSG00000004266	Ptpn6	protein tyrosine phosphatase, non-receptor type 6	-1.02	4.1669	3.1467	0.0003929
ENSMUSG00000034957	Cebpa	CCAAT/enhancer binding protein alpha	-0.7238	5.05716	4.33334	0.0004305
ENSMUSG00000031647	Mfap3l	microfibrillar-associated protein 3-like	-0.4899	6.25423	5.76431	0.0004305
ENSMUSG00000022108	Itm2b	integral membrane protein 2B	-0.2516	9.6834	9.43177	0.0004475
ENSMUSG00000056737	Capg	capping actin protein, gelsolin like	-1.229	3.76579	2.53655	0.0004577
ENSMUSG00000031827	Cotl1	coactosin like F-actin binding protein 1	-0.421	7.19113	6.77017	0.0004715
ENSMUSG00000019986	Ahi1	Abelson helper integration site 1	0.2931	7.77106	8.06418	0.0004767
ENSMUSG00000030934	Oat	ornithine aminotransferase	-0.3574	6.96256	6.60518	0.0004967
ENSMUSG00000062542	Syt9	synaptotagmin IX	1.281	3.04364	4.32505	0.0005025
ENSMUSG00000031565	Fgfr1	fibroblast growth factor receptor 1	-0.455	7.54051	7.08547	0.0005614
ENSMUSG00000050708	Ftl1	ferritin light polypeptide 1	-0.448	8.5054	8.05741	0.0005854
ENSMUSG00000030560	Ctsc	cathepsin C	-0.8469	4.56042	3.71348	0.0005857
ENSMUSG00000027422	Rrbp1	ribosome binding protein 1	-0.3846	6.92174	6.53712	0.0006309
ENSMUSG00000024300	Myo1f	myosin IF	-1.099	3.92978	2.83096	0.0006987
ENSMUSG00000061232	H2-K1	histocompatibility 2, K1, K region	-1.004	6.73204	5.72789	0.0007169
ENSMUSG00000035805	Mlc1	megalencephalic leukoencephalopathy with subcortic...	-0.4183	8.17941	7.76108	0.0007169
ENSMUSG00000047557	Lxn	latexin	-0.4703	6.09409	5.62375	0.0007339
ENSMUSG00000034707	Gns	glucosamine (N-acetyl)-6-sulfatase	-0.3151	7.29887	6.98382	0.0007463
ENSMUSG00000002332	Dhrs1	dehydrogenase/reductase 1	-0.4212	6.51611	6.09486	0.0007676
ENSMUSG00000021624	Cd180	CD180 antigen	-1.162	3.82062	2.65895	0.0008034
ENSMUSG00000031837	Necab2	N-terminal EF-hand calcium binding protein 2	0.4897	6.76949	7.25919	0.000826
ENSMUSG00000024411	Aqp4	aquaporin 4	-0.6987	7.76213	7.0634	0.0008392
ENSMUSG00000024851	Pitpnm1	phosphatidylinositol transfer protein, membrane-as...	0.2617	7.76446	8.02615	0.0008507
ENSMUSG00000022323	Rida	reactive intermediate imine deaminase A homolog	-0.4962	6.14454	5.64832	0.0008722
ENSMUSG00000038147	Cd84	CD84 antigen	-1.185	3.7069	2.52157	0.0008857
ENSMUSG00000045294	Insig1	insulin induced gene 1	0.5018	5.39855	5.90038	0.0008857
ENSMUSG00000021190	Lgmn	legumain	-0.4176	7.58287	7.16525	0.0009036
ENSMUSG00000062151	Unc13c	unc-13 homolog C	1.276	3.38739	4.66346	0.0009149
ENSMUSG00000003534	Ddr1	discoidin domain receptor family, member 1	-0.4269	7.12414	6.69723	0.0009458
ENSMUSG00000074457	S100a16	S100 calcium binding protein A16	-0.4127	6.40112	5.98846	0.0009511
ENSMUSG00000033585	Ndn	necdin, MAGE family member	0.5438	7.22016	7.76393	0.0009603
ENSMUSG00000023913	Pla2g7	phospholipase A2, group VII (platelet-activating f...	-0.4587	8.00063	7.54197	0.001025
ENSMUSG00000023367	Tmem176a	transmembrane protein 176A	-0.7197	4.85186	4.1322	0.00109
ENSMUSG00000035929	H2-Q4	histocompatibility 2, Q region locus 4	-1.002	4.36801	3.36607	0.001277
ENSMUSG00000017009	Sdc4	syndecan 4	-0.5246	7.20072	6.67615	0.001334
ENSMUSG00000029484	Anxa3	annexin A3	-0.7757	4.65593	3.88026	0.00144
ENSMUSG00000090061	Nwd2	NACHT and WD repeat domain containing 2	0.5826	4.9162	5.49883	0.001447
ENSMUSG00000004267	Eno2	enolase 2, gamma neuronal	0.2103	9.7582	9.96852	0.001463
ENSMUSG00000025647	Shisa5	shisa family member 5	-0.4279	6.30902	5.88109	0.001485
ENSMUSG00000064267	Hvcn1	hydrogen voltage-gated channel 1	-1.084	3.86983	2.78572	0.001497
ENSMUSG00000000567	Sox9	SRY (sex determining region Y)-box 9	-0.5299	5.62152	5.09163	0.001564
ENSMUSG00000005360	Slc1a3	solute carrier family 1 (glial high affinity gluta...	-0.3731	9.59924	9.22613	0.001565
ENSMUSG00000023224	Serping1	serine (or cysteine) peptidase inhibitor, clade G,...	-0.9099	4.39591	3.48597	0.001573
ENSMUSG00000026123	Plekhb2	pleckstrin homology domain containing, family B (e...	0.2541	7.70839	7.9625	0.001584
ENSMUSG00000038065	Mturn	maturin, neural progenitor differentiation regulat...	0.2732	7.4908	7.76397	0.0016
ENSMUSG00000089715	Cbx6	chromobox 6	0.197	8.78388	8.9809	0.001689
ENSMUSG00000032648	Pygm	muscle glycogen phosphorylase	0.5662	4.92476	5.49092	0.001736
ENSMUSG00000062661	Ncs1	neuronal calcium sensor 1	0.2488	8.54458	8.7934	0.001756
ENSMUSG00000026227	2810459M11Rik	RIKEN cDNA 2810459M11 gene	-0.7046	4.8639	4.15935	0.001812
ENSMUSG00000024524	Gnal	guanine nucleotide binding protein, alpha stimulat...	0.5254	6.89622	7.42157	0.001893
ENSMUSG00000010663	Fads1	fatty acid desaturase 1	0.2894	7.94421	8.2336	0.001898
ENSMUSG00000103332	Pcdhga2	protocadherin gamma subfamily A, 2	-0.1565	9.4031	9.24664	0.001919
ENSMUSG00000102543	Pcdhgc5	protocadherin gamma subfamily C, 5	-0.1548	9.51243	9.35758	0.001939
ENSMUSG00000046312	Myorg	myogenesis regulating glycosidase (putative)	0.574	4.75069	5.32466	0.002097
ENSMUSG00000104063	Pcdhgb7	protocadherin gamma subfamily B, 7	-0.1543	9.36267	9.20837	0.002097
ENSMUSG00000047507	Baiap3	BAI1-associated protein 3	1.103	3.56564	4.66858	0.002135
ENSMUSG00000023249	Parp3	poly (ADP-ribose) polymerase family, member 3	-0.9346	4.1304	3.19584	0.002335
ENSMUSG00000001467	Cyp51	cytochrome P450, family 51	0.479	5.36722	5.84625	0.002446
ENSMUSG00000024012	Mtch1	mitochondrial carrier 1	0.2093	8.62387	8.83315	0.002509
ENSMUSG00000007872	Id3	inhibitor of DNA binding 3	-0.535	5.72971	5.19467	0.00257
ENSMUSG00000068220	Lgals1	lectin, galactose binding, soluble 1	-0.646	5.00861	4.36265	0.002647
ENSMUSG00000020142	Slc1a4	solute carrier family 1 (glutamate/neutral amino a...	-0.3704	6.5142	6.14375	0.002667
ENSMUSG00000027397	Slc20a1	solute carrier family 20, member 1	-0.2799	7.65061	7.37074	0.0027
ENSMUSG00000049775	Tmsb4x	thymosin, beta 4, X chromosome	-0.2568	9.78064	9.52387	0.002724
ENSMUSG00000026288	Inpp5d	inositol polyphosphate-5-phosphatase D	-0.6427	4.89517	4.25244	0.002763
ENSMUSG00000023067	Cdkn1a	cyclin dependent kinase inhibitor 1A	-0.8367	4.42484	3.58818	0.002825
ENSMUSG00000062593	Lilrb4a	leukocyte immunoglobulin-like receptor, subfamily ...	-1.52	2.7787	1.25873	0.002862
ENSMUSG00000020097	Sgpl1	sphingosine phosphate lyase 1	-0.4349	6.00712	5.57223	0.002867
ENSMUSG00000030737	Slco2b1	solute carrier organic anion transporter family, m...	-0.5814	5.19706	4.61563	0.003015
ENSMUSG00000037843	Vstm2l	V-set and transmembrane domain containing 2-like	0.4627	5.40553	5.86818	0.003082
ENSMUSG00000103088	Pcdhgb6	protocadherin gamma subfamily B, 6	-0.1514	9.39691	9.24549	0.003139
ENSMUSG00000020894	Vamp2	vesicle-associated membrane protein 2	0.1352	10.1377	10.2729	0.003302
ENSMUSG00000040867	Begain	brain-enriched guanylate kinase-associated	0.2625	7.25982	7.52229	0.003307
ENSMUSG00000030786	Itgam	integrin alpha M	-0.5745	5.36661	4.79214	0.00342
ENSMUSG00000070327	Rnf213	ring finger protein 213	-0.6649	5.12686	4.46192	0.003438
ENSMUSG00000037405	Icam1	intercellular adhesion molecule 1	-1.074	3.50191	2.42834	0.003674
ENSMUSG00000020538	Srebf1	sterol regulatory element binding transcription fa...	-0.3625	6.73092	6.36839	0.003706
ENSMUSG00000102742	Pcdhga11	protocadherin gamma subfamily A, 11	-0.1534	9.4217	9.26833	0.003724
ENSMUSG00000104346	Pcdhga3	protocadherin gamma subfamily A, 3	-0.1525	9.40667	9.2542	0.003761
ENSMUSG00000025666	Tmem47	transmembrane protein 47	-0.3652	6.94187	6.57668	0.003788
ENSMUSG00000026786	Apbb1ip	amyloid beta precursor protein binding family B me...	-0.7966	4.29002	3.49344	0.003846
ENSMUSG00000032440	Tgfbr2	transforming growth factor, beta receptor II	-0.6038	5.06087	4.45711	0.003847
ENSMUSG00000102440	Pcdhga9	protocadherin gamma subfamily A, 9	-0.1474	9.3586	9.21117	0.003964
ENSMUSG00000037259	Dzank1	double zinc ribbon and ankyrin repeat domains 1	0.3452	7.3416	7.68676	0.003967
ENSMUSG00000103144	Pcdhga1	protocadherin gamma subfamily A, 1	-0.1434	9.345	9.20161	0.004088
ENSMUSG00000019990	Pde7b	phosphodiesterase 7B	0.6958	3.68277	4.37859	0.004091
ENSMUSG00000102748	Pcdhgb2	protocadherin gamma subfamily B, 2	-0.1442	9.3427	9.19847	0.004106
ENSMUSG00000034463	Scara3	scavenger receptor class A, member 3	-0.5009	5.78344	5.28255	0.004136
ENSMUSG00000040856	Dlk1	delta like non-canonical Notch ligand 1	1.067	3.17673	4.24412	0.004146
ENSMUSG00000028195	Ccn1	cellular communication network factor 1	-0.7989	4.46266	3.6638	0.004186
ENSMUSG00000022912	Pros1	protein S (alpha)	-0.6824	4.7312	4.04883	0.004187
ENSMUSG00000024397	Aif1	allograft inflammatory factor 1	-0.8067	4.18509	3.37841	0.004209
ENSMUSG00000007613	Tgfbr1	transforming growth factor, beta receptor I	-0.5511	5.24939	4.69826	0.004221
ENSMUSG00000102428	Pcdhga12	protocadherin gamma subfamily A, 12	-0.1511	9.41353	9.26244	0.004245
ENSMUSG00000059326	Csf2ra	colony stimulating factor 2 receptor, alpha, low-a...	-0.4458	5.82614	5.38036	0.004265
ENSMUSG00000036972	Zic4	zinc finger protein of the cerebellum 4	1.123	2.10314	3.22603	0.004348
ENSMUSG00000016494	Cd34	CD34 antigen	-0.4419	6.00027	5.5584	0.004411
ENSMUSG00000023036	Pcdhgc4	protocadherin gamma subfamily C, 4	-0.1436	9.37136	9.22781	0.004411
ENSMUSG00000103037	Pcdhgb1	protocadherin gamma subfamily B, 1	-0.1448	9.37209	9.22731	0.004427
ENSMUSG00000058135	Gstm1	glutathione S-transferase, mu 1	-0.2858	8.42552	8.13969	0.004492
ENSMUSG00000103749	Pcdhgb5	protocadherin gamma subfamily B, 5	-0.1428	9.33416	9.19134	0.00471
ENSMUSG00000007950	Abhd8	abhydrolase domain containing 8	0.246	7.45977	7.70573	0.004874
ENSMUSG00000103585	Pcdhgb4	protocadherin gamma subfamily B, 4	-0.1415	9.33074	9.18925	0.005018
ENSMUSG00000038764	Ptpn3	protein tyrosine phosphatase, non-receptor type 3	0.3921	6.22785	6.61993	0.005346
ENSMUSG00000020143	Dock2	dedicator of cyto-kinesis 2	-0.8738	3.92214	3.0483	0.005387
ENSMUSG00000030806	Stx1b	syntaxin 1B	0.1631	9.14499	9.3081	0.005403
ENSMUSG00000005413	Hmox1	heme oxygenase 1	-0.889	4.02964	3.14063	0.00547
ENSMUSG00000033007	Asic4	acid-sensing ion channel family member 4	0.7178	3.30341	4.0212	0.00558
ENSMUSG00000044986	Tst	thiosulfate sulfurtransferase, mitochondrial	-0.487	5.56123	5.07427	0.005583
ENSMUSG00000102918	Pcdhgc3	protocadherin gamma subfamily C, 3	-0.1547	9.50265	9.34793	0.005738
ENSMUSG00000028517	Plpp3	phospholipid phosphatase 3	-0.2867	8.45687	8.17018	0.005994
ENSMUSG00000022218	Tgm1	transglutaminase 1, K polypeptide	-1.535	2.66401	1.12921	0.006168
ENSMUSG00000033350	Chst2	carbohydrate sulfotransferase 2	-0.2631	7.91061	7.64748	0.006232
ENSMUSG00000006930	Hap1	huntingtin-associated protein 1	0.4949	7.5728	8.06766	0.006236
ENSMUSG00000099041	Gm28035	predicted gene, 28035	-0.3482	6.4691	6.12093	0.006597
ENSMUSG00000039682	Lap3	leucine aminopeptidase 3	-0.3718	6.24933	5.87757	0.00662
ENSMUSG00000103677	Pcdhga4	protocadherin gamma subfamily A, 4	-0.143	9.37404	9.23104	0.00662
ENSMUSG00000093930	Hmgcs1	3-hydroxy-3-methylglutaryl-Coenzyme A synthase 1	0.31	7.18201	7.49199	0.006742
ENSMUSG00000001750	Tcirg1	T cell, immune regulator 1, ATPase, H+ transportin...	-0.5591	5.26167	4.70261	0.006815
ENSMUSG00000028465	Tln1	talin 1	-0.338	6.58927	6.25131	0.006876
ENSMUSG00000032788	Pdxk	pyridoxal (pyridoxine, vitamin B6) kinase	0.2588	7.23557	7.49442	0.006991
ENSMUSG00000102222	Pcdhga10	protocadherin gamma subfamily A, 10	-0.1403	9.35218	9.21185	0.006991
ENSMUSG00000103793	Pcdhga6	protocadherin gamma subfamily A, 6	-0.1452	9.38722	9.24203	0.007317
ENSMUSG00000022443	Myh9	myosin, heavy polypeptide 9, non-muscle	-0.2782	7.44778	7.16958	0.007514
ENSMUSG00000103897	Pcdhga8	protocadherin gamma subfamily A, 8	-0.1424	9.37078	9.22833	0.007514
ENSMUSG00000064215	Ifi27	interferon, alpha-inducible protein 27	-0.4754	5.98229	5.50688	0.007753
ENSMUSG00000103472	Pcdhga7	protocadherin gamma subfamily A, 7	-0.143	9.38622	9.24318	0.007855
ENSMUSG00000014602	Kif1a	kinesin family member 1A	0.1572	10.2806	10.4379	0.007955
ENSMUSG00000018398	Septin8	septin 8	-0.1703	8.62301	8.45268	0.007958
ENSMUSG00000067212	H2-T23	histocompatibility 2, T region locus 23	-0.7589	4.39359	3.63465	0.007974
ENSMUSG00000029919	Hpgds	hematopoietic prostaglandin D synthase	-0.7803	4.13673	3.35643	0.008102
ENSMUSG00000020585	Laptm4a	lysosomal-associated protein transmembrane 4A	-0.2273	7.87584	7.64854	0.008273
ENSMUSG00000036833	Pnpla7	patatin-like phospholipase domain containing 7	-0.4983	5.4379	4.93963	0.008316
ENSMUSG00000053113	Socs3	suppressor of cytokine signaling 3	-1.144	3.22303	2.07911	0.008413
ENSMUSG00000035697	Arhgap45	Rho GTPase activating protein 45	-0.6932	4.56805	3.87481	0.008524
ENSMUSG00000015839	Nfe2l2	nuclear factor, erythroid derived 2, like 2	-0.5546	5.12291	4.56832	0.008782
ENSMUSG00000029126	Nsg1	neuron specific gene family member 1	0.2331	7.89689	8.13003	0.009011
ENSMUSG00000028268	Gbp3	guanylate binding protein 3	-0.8308	4.12518	3.29433	0.009138
ENSMUSG00000046844	Vat1l	vesicle amine transport protein 1 like	0.977	4.92419	5.90114	0.009147
ENSMUSG00000070802	Pnma8b	PNMA family member 8B	0.2072	8.81643	9.02366	0.009172
ENSMUSG00000026424	Gpr37l1	G protein-coupled receptor 37-like 1	-0.3058	8.23377	7.92799	0.009187
ENSMUSG00000059857	Ntng1	netrin G1	0.6788	5.14749	5.82633	0.009244
ENSMUSG00000033615	Cplx1	complexin 1	0.295	9.32091	9.61586	0.009293
ENSMUSG00000044080	S100a1	S100 calcium binding protein A1	-0.3701	6.38135	6.01127	0.009339
ENSMUSG00000042804	Gpr153	G protein-coupled receptor 153	0.6972	3.68562	4.38279	0.009445
ENSMUSG00000103567	Pcdhga5	protocadherin gamma subfamily A, 5	-0.137	9.35106	9.21404	0.009535
ENSMUSG00000027712	Anxa5	annexin A5	-0.4593	6.4553	5.996	0.009623
ENSMUSG00000041046	Ramp3	receptor (calcitonin) activity modifying protein 3	1.012	2.45381	3.46574	0.009645
ENSMUSG00000026480	Ncf2	neutrophil cytosolic factor 2	-0.9409	3.68791	2.74697	0.009672
ENSMUSG00000024462	Gabbr1	gamma-aminobutyric acid type B receptor subunit 1	0.2115	9.62675	9.83822	0.01011
ENSMUSG00000015340	Cybb	cytochrome b-245, beta polypeptide	-1.314	2.78213	1.46858	0.01056
ENSMUSG00000062647	Rpl7a	ribosomal protein L7A	-0.2088	8.00121	7.79239	0.01058
ENSMUSG00000028661	Epha8	Eph receptor A8	0.7906	2.62271	3.41335	0.01068
ENSMUSG00000024827	Gldc	glycine decarboxylase	-0.5397	5.80012	5.26039	0.01072
ENSMUSG00000022469	Rapgef3	Rap guanine nucleotide exchange factor (GEF) 3	-0.4135	6.17459	5.76111	0.01082
ENSMUSG00000035640	Cbarp	calcium channel, voltage-dependent, beta subunit a...	0.1848	8.25505	8.43986	0.01096
ENSMUSG00000031431	Tsc22d3	TSC22 domain family, member 3	0.5093	6.11135	6.62068	0.01112
ENSMUSG00000053477	Tcf4	transcription factor 4	-0.4585	8.73993	8.28147	0.01112
ENSMUSG00000072825	Cep170b	centrosomal protein 170B	0.1941	8.0817	8.27577	0.0115
ENSMUSG00000010066	Cacna2d2	calcium channel, voltage-dependent, alpha 2/delta ...	0.5339	5.38652	5.92044	0.01153
ENSMUSG00000061859	Patj	PATJ, crumbs cell polarity complex component	0.9023	3.18309	4.08534	0.01198
ENSMUSG00000027995	Tlr2	toll-like receptor 2	-1.111	3.09641	1.98519	0.01202
ENSMUSG00000029223	Uchl1	ubiquitin carboxy-terminal hydrolase L1	0.2609	9.1413	9.40224	0.0121
ENSMUSG00000019978	Epb41l2	erythrocyte membrane protein band 4.1 like 2	-0.3045	6.7543	6.44979	0.01215
ENSMUSG00000028927	Padi2	peptidyl arginine deiminase, type II	-0.5476	6.46031	5.91276	0.01239
ENSMUSG00000022351	Sqle	squalene epoxidase	0.4164	5.34152	5.75795	0.01257
ENSMUSG00000040613	Apobec1	apolipoprotein B mRNA editing enzyme, catalytic po...	-1	3.19096	2.19091	0.01297
ENSMUSG00000058793	Cds2	CDP-diacylglycerol synthase 2	0.1426	9.04949	9.19206	0.01328
ENSMUSG00000001763	Tspan33	tetraspanin 33	0.5113	4.78952	5.30082	0.01348
ENSMUSG00000004707	Ly9	lymphocyte antigen 9	-1.346	2.70401	1.35837	0.0136
ENSMUSG00000021466	Ptch1	patched 1	0.4204	5.25861	5.679	0.01409
ENSMUSG00000029561	Oasl2	2'-5' oligoadenylate synthetase-like 2	-1.127	4.54567	3.41889	0.01425
ENSMUSG00000071234	Syndig1l	synapse differentiation inducing 1 like	1.032	3.24621	4.27828	0.01443
ENSMUSG00000028270	Gbp2	guanylate binding protein 2	-0.9187	3.6945	2.77579	0.01448
ENSMUSG00000044468	Tent5c	terminal nucleotidyltransferase 5C	-0.8554	3.66137	2.806	0.01448
ENSMUSG00000079293	Clec7a	C-type lectin domain family 7, member a	-1.459	2.63978	1.18098	0.01463
ENSMUSG00000059743	Fdps	farnesyl diphosphate synthetase	0.4497	5.05071	5.50036	0.01493
ENSMUSG00000053166	Cdh22	cadherin 22	0.6045	4.01012	4.61466	0.01521
ENSMUSG00000037706	Cd81	CD81 antigen	-0.2948	8.88584	8.59108	0.01525
ENSMUSG00000029371	Cxcl5	C-X-C motif chemokine ligand 5	-1.307	2.70564	1.39863	0.01571
ENSMUSG00000070532	Ccdc190	coiled-coil domain containing 190	-0.5573	4.90113	4.34383	0.01595
ENSMUSG00000026749	Nek6	NIMA (never in mitosis gene a)-related expressed k...	-0.4276	5.86067	5.43306	0.01622
ENSMUSG00000018920	Cxcl16	C-X-C motif chemokine ligand 16	-1.132	3.17414	2.04234	0.01624
ENSMUSG00000052698	Tln2	talin 2	0.2646	6.87725	7.1419	0.01629
ENSMUSG00000022463	Srebf2	sterol regulatory element binding factor 2	0.2106	7.59764	7.80825	0.0163
ENSMUSG00000000159	Igsf5	immunoglobulin superfamily, member 5	0.8088	6.86265	7.6714	0.01682
ENSMUSG00000047181	Samd14	sterile alpha motif domain containing 14	0.3541	5.91349	6.26762	0.01685
ENSMUSG00000090223	Pcp4	Purkinje cell protein 4	0.8205	6.93601	7.75653	0.0169
ENSMUSG00000026385	Dbi	diazepam binding inhibitor	-0.3752	7.75709	7.38185	0.01701
ENSMUSG00000040097	Flywch1	FLYWCH-type zinc finger 1	0.2028	7.70496	7.90773	0.01719
ENSMUSG00000033287	Kctd17	potassium channel tetramerisation domain containin...	0.2719	6.97024	7.24217	0.01761
ENSMUSG00000021242	Npc2	NPC intracellular cholesterol transporter 2	-0.3952	6.87676	6.48153	0.0177
ENSMUSG00000022840	Adcy5	adenylate cyclase 5	0.5111	7.07811	7.58924	0.01781
ENSMUSG00000015149	Sirt2	sirtuin 2	-0.231	7.78078	7.54976	0.01798
ENSMUSG00000026104	Stat1	signal transducer and activator of transcription 1	-0.5443	5.62852	5.0842	0.0183
ENSMUSG00000040260	Daam2	dishevelled associated activator of morphogenesis ...	-0.3293	7.72128	7.39201	0.0183
ENSMUSG00000040552	C3ar1	complement component 3a receptor 1	-1.025	3.21595	2.19134	0.01835
ENSMUSG00000024978	Gpam	glycerol-3-phosphate acyltransferase, mitochondria...	-0.4203	5.65064	5.23037	0.01835
ENSMUSG00000032902	Slc16a1	solute carrier family 16 (monocarboxylic acid tran...	-0.4169	5.62738	5.21049	0.01835
ENSMUSG00000024008	Cpne5	copine V	0.6482	4.95757	5.60579	0.01836
ENSMUSG00000048126	Col6a3	collagen, type VI, alpha 3	0.8991	2.53535	3.43449	0.01838
ENSMUSG00000021273	Fdft1	farnesyl diphosphate farnesyl transferase 1	0.336	6.1694	6.50535	0.01846
ENSMUSG00000027833	Shox2	SHOX homeobox 2	1.984	0.612	2.59573	0.01898
ENSMUSG00000046718	Bst2	bone marrow stromal cell antigen 2	-0.8237	3.77171	2.94803	0.01915
ENSMUSG00000020684	Rasl10b	RAS-like, family 10, member B	0.2491	8.03384	8.28299	0.0197
ENSMUSG00000027950	Chrnb2	cholinergic receptor nicotinic beta 2 subunit	0.3239	5.97154	6.29546	0.01976
ENSMUSG00000029723	Tsc22d4	Tsc22 domain family, member 4	-0.3299	7.27111	6.94118	0.01981
ENSMUSG00000050335	Lgals3	lectin, galactose binding, soluble 3	-1.144	2.93769	1.79353	0.01986
ENSMUSG00000026547	Tagln2	transgelin 2	-0.6725	4.38026	3.70781	0.01986
ENSMUSG00000032259	Drd2	dopamine receptor D2	1.219	1.47699	2.69626	0.01988
ENSMUSG00000008090	Fgfrl1	fibroblast growth factor receptor-like 1	-0.5278	5.02729	4.49949	0.02017
ENSMUSG00000032193	Ldlr	low density lipoprotein receptor	0.5813	4.07353	4.65487	0.02049
ENSMUSG00000030307	Slc6a11	solute carrier family 6 (neurotransmitter transpor...	0.5838	7.22369	7.80754	0.02056
ENSMUSG00000041351	Rap1gap	Rap1 GTPase-activating protein	0.3523	7.91779	8.27005	0.0206
ENSMUSG00000026748	Plxdc2	plexin domain containing 2	-0.4069	5.69173	5.28484	0.02062
ENSMUSG00000069833	Ahnak	AHNAK nucleoprotein	-0.4286	5.94001	5.51146	0.02069
ENSMUSG00000020263	Appl2	adaptor protein, phosphotyrosine interaction, PH d...	-0.2689	7.53073	7.26179	0.02073
ENSMUSG00000025272	Tro	trophinin	0.2073	7.57944	7.78672	0.02073
ENSMUSG00000028949	Smarcd3	SWI/SNF related, matrix associated, actin dependen...	0.3115	6.13113	6.44263	0.02134
ENSMUSG00000052142	Rasal3	RAS protein activator like 3	-0.858	3.76313	2.90518	0.02213
ENSMUSG00000031790	Mmp15	matrix metallopeptidase 15	0.5058	4.4565	4.96226	0.02213
ENSMUSG00000024985	Tcf7l2	transcription factor 7 like 2, T cell specific, HM...	0.9747	3.31966	4.29436	0.0222
ENSMUSG00000001123	Lgals9	lectin, galactose binding, soluble 9	-0.6976	4.13217	3.43453	0.02229
ENSMUSG00000038677	Scube3	signal peptide, CUB domain, EGF-like 3	0.8963	2.03537	2.9317	0.02266
ENSMUSG00000026204	Ptprn	protein tyrosine phosphatase receptor type N	0.1336	9.19777	9.33139	0.02303
ENSMUSG00000031760	Mt3	metallothionein 3	-0.2859	8.67688	8.39101	0.02307
ENSMUSG00000050315	Synpo2	synaptopodin 2	0.8594	2.99658	3.85595	0.02361
ENSMUSG00000000594	Gm2a	GM2 ganglioside activator protein	-0.2865	6.78911	6.50264	0.02371
ENSMUSG00000030577	Cd22	CD22 antigen	-1.261	2.5672	1.30652	0.02374
ENSMUSG00000031596	Slc7a2	solute carrier family 7 (cationic amino acid trans...	-0.4649	5.1893	4.72437	0.02374
ENSMUSG00000094840	Muc3a	mucin 3A, cell surface associated	-0.8173	3.63116	2.81381	0.02388
ENSMUSG00000016534	Lamp2	lysosomal-associated membrane protein 2	-0.342	6.37591	6.03389	0.02388
ENSMUSG00000026173	Plcd4	phospholipase C, delta 4	-0.4734	5.32275	4.84937	0.02468
ENSMUSG00000021478	Drd1	dopamine receptor D1	0.7608	2.34519	3.10599	0.02529
ENSMUSG00000010095	Slc3a2	solute carrier family 3 (activators of dibasic and...	-0.2274	7.2803	7.0529	0.02603
ENSMUSG00000021127	Zfp36l1	zinc finger protein 36, C3H type-like 1	-0.4301	5.46344	5.03333	0.02608
ENSMUSG00000044811	Cd300c2	CD300C molecule 2	-0.8588	3.55694	2.69817	0.02612
ENSMUSG00000030681	Mvp	major vault protein	-0.6062	4.50399	3.89781	0.02635
ENSMUSG00000024338	Psmb8	proteasome (prosome, macropain) subunit, beta type...	-0.8219	3.73815	2.91628	0.02708
ENSMUSG00000039934	Gsap	gamma-secretase activating protein	-0.6176	4.42159	3.80396	0.02716
ENSMUSG00000034472	Rasd2	RASD family, member 2	0.6842	5.97053	6.65476	0.02723
ENSMUSG00000024991	Eif3a	eukaryotic translation initiation factor 3, subuni...	-0.1872	7.88561	7.69842	0.02772
ENSMUSG00000021508	Cxcl14	C-X-C motif chemokine ligand 14	-0.2576	7.07759	6.82003	0.02785
ENSMUSG00000025203	Scd2	stearoyl-Coenzyme A desaturase 2	0.192	10.3784	10.5703	0.02791
ENSMUSG00000040747	Cd53	CD53 antigen	-0.7898	3.83973	3.0499	0.02801
ENSMUSG00000045573	Penk	preproenkephalin	0.9961	4.87894	5.87501	0.02873
ENSMUSG00000027489	Necab3	N-terminal EF-hand calcium binding protein 3	0.5658	4.72802	5.29384	0.02882
ENSMUSG00000021822	Plau	plasminogen activator, urokinase	-1.019	3.18259	2.16382	0.02908
ENSMUSG00000045333	Zfp423	zinc finger protein 423	0.4863	4.41483	4.90112	0.02922
ENSMUSG00000052310	Slc39a1	solute carrier family 39 (zinc transporter), membe...	-0.3858	5.77304	5.3872	0.02922
ENSMUSG00000029359	Tesc	tescalcin	0.4404	4.76379	5.20416	0.02964
ENSMUSG00000063239	Grm4	glutamate receptor, metabotropic 4	0.6414	4.29559	4.93703	0.02996
ENSMUSG00000027849	Syt6	synaptotagmin VI	0.6571	3.51447	4.17156	0.03008
ENSMUSG00000026028	Trak2	trafficking protein, kinesin binding 2	0.1989	7.64716	7.84601	0.0301
ENSMUSG00000029189	Sel1l3	sel-1 suppressor of lin-12-like 3 (C. elegans)	-0.3254	6.19251	5.86709	0.03074
ENSMUSG00000024109	Nrxn1	neurexin I	-0.194	8.2915	8.09755	0.03074
ENSMUSG00000000732	Icosl	icos ligand	-0.5774	4.77145	4.19407	0.03106
ENSMUSG00000061702	Tmem91	transmembrane protein 91	0.686	3.24053	3.92652	0.03119
ENSMUSG00000022587	Ly6e	lymphocyte antigen 6 family member E	-0.2615	7.95948	7.69801	0.03122
ENSMUSG00000035486	Plk5	polo like kinase 5	0.5509	4.28899	4.83994	0.03131
ENSMUSG00000022791	Tnk2	tyrosine kinase, non-receptor, 2	0.177	8.03051	8.20749	0.03131
ENSMUSG00000018042	Cyb5r3	cytochrome b5 reductase 3	-0.25	6.92714	6.6771	0.03139
ENSMUSG00000038612	Mcl1	myeloid cell leukemia sequence 1	-0.2822	6.58473	6.30255	0.03208
ENSMUSG00000029413	Naaa	N-acylethanolamine acid amidase	-0.3866	5.88913	5.50254	0.03223
ENSMUSG00000024810	Il33	interleukin 33	-0.3711	6.57758	6.20649	0.03253
ENSMUSG00000034855	Cxcl10	C-X-C motif chemokine ligand 10	-1.295	2.88393	1.58916	0.03277
ENSMUSG00000033192	Lpcat2	lysophosphatidylcholine acyltransferase 2	-0.582	4.56243	3.98046	0.03281
ENSMUSG00000029819	Npy	neuropeptide Y	-0.4218	6.01433	5.59258	0.03399
ENSMUSG00000028803	Nipal3	NIPA-like domain containing 3	0.2454	6.74705	6.99247	0.03401
ENSMUSG00000046480	Scn4b	sodium channel, type IV, beta	0.9701	4.58502	5.55509	0.03403
ENSMUSG00000030704	Rab6a	RAB6A, member RAS oncogene family	-0.1507	8.98698	8.83628	0.03409
ENSMUSG00000038539	Atf5	activating transcription factor 5	-0.3738	5.80116	5.42733	0.03412
ENSMUSG00000048814	Lonrf2	LON peptidase N-terminal domain and ring finger 2	0.2133	7.27306	7.4864	0.03412
ENSMUSG00000019230	Lhx9	LIM homeobox protein 9	0.6136	3.75939	4.37301	0.03439
ENSMUSG00000001911	Nfix	nuclear factor I/X	-0.3054	8.63274	8.32737	0.03479
ENSMUSG00000007041	Clic1	chloride intracellular channel 1	-0.6584	4.28314	3.62478	0.03505
ENSMUSG00000028328	Tmod1	tropomodulin 1	-0.3802	5.91812	5.53795	0.03505
ENSMUSG00000014786	Slc9a5	solute carrier family 9 (sodium/hydrogen exchanger...	0.4541	4.60075	5.05485	0.03538
ENSMUSG00000025092	Hspa12a	heat shock protein 12A	0.1858	7.91398	8.09979	0.03538
ENSMUSG00000068696	Gpr88	G-protein coupled receptor 88	1.103	2.60761	3.71012	0.03592
ENSMUSG00000027223	Mapk8ip1	mitogen-activated protein kinase 8 interacting pro...	0.1533	8.72592	8.87925	0.03692
ENSMUSG00000032046	Abhd12	abhydrolase domain containing 12	-0.1504	8.3874	8.23701	0.03709
ENSMUSG00000061524	Zic2	zinc finger protein of the cerebellum 2	0.5661	3.95732	4.52341	0.03751
ENSMUSG00000020866	Cacna1g	calcium channel, voltage-dependent, T type, alpha ...	0.4398	6.37104	6.81085	0.03796
ENSMUSG00000038224	Serpinf2	serine (or cysteine) peptidase inhibitor, clade F,...	-1.092	2.43779	1.34607	0.03871
ENSMUSG00000030798	Cd37	CD37 antigen	-0.7088	3.96898	3.26016	0.03871
ENSMUSG00000043323	Fbrsl1	fibrosin-like 1	-0.3031	6.37843	6.07529	0.03871
ENSMUSG00000026764	Kif5c	kinesin family member 5C	0.138	9.30009	9.43805	0.039
ENSMUSG00000022489	Pde1b	phosphodiesterase 1B, Ca2+-calmodulin dependent	0.493	7.18515	7.67819	0.03914
ENSMUSG00000048142	Nat8l	N-acetyltransferase 8-like	0.2489	8.29318	8.54208	0.03995
ENSMUSG00000028745	Capzb	capping actin protein of muscle Z-line subunit bet...	-0.1615	8.25116	8.08965	0.04013
ENSMUSG00000020262	Adarb1	adenosine deaminase, RNA-specific, B1	0.3754	7.59497	7.97032	0.04047
ENSMUSG00000030894	Tpp1	tripeptidyl peptidase I	-0.2539	6.82799	6.57406	0.04051
ENSMUSG00000026860	Sh3glb2	SH3-domain GRB2-like endophilin B2	0.1846	7.69981	7.88441	0.04071
ENSMUSG00000027111	Itga6	integrin alpha 6	-0.4753	5.01314	4.53779	0.04085
ENSMUSG00000032946	Rasgrp2	RAS, guanyl releasing protein 2	0.6434	4.18628	4.82971	0.0412
ENSMUSG00000029054	Gabrd	gamma-aminobutyric acid (GABA) A receptor, subunit...	0.543	4.72288	5.26587	0.04141
ENSMUSG00000015745	Plekho1	pleckstrin homology domain containing, family O me...	-0.4089	5.46582	5.05689	0.04141
ENSMUSG00000028445	Enho	energy homeostasis associated	0.3978	5.04711	5.44488	0.04141
ENSMUSG00000032816	Igdcc4	immunoglobulin superfamily, DCC subclass, member 4	-0.3098	6.27238	5.96253	0.0415
ENSMUSG00000024308	Tapbp	TAP binding protein	-0.3923	5.63009	5.23779	0.04175
ENSMUSG00000036712	Cyld	CYLD lysine 63 deubiquitinase	0.2505	6.84381	7.09431	0.04175
ENSMUSG00000001794	Capns1	calpain, small subunit 1	-0.21	7.77508	7.5651	0.04175
ENSMUSG00000064179	Tnnt1	troponin T1, skeletal, slow	1.088	1.9779	3.06575	0.04204
ENSMUSG00000017167	Cntnap1	contactin associated protein-like 1	0.1673	8.0912	8.25851	0.04238
ENSMUSG00000023328	Ache	acetylcholinesterase	0.3085	6.28416	6.59263	0.04243
ENSMUSG00000039630	Hnrnpu	heterogeneous nuclear ribonucleoprotein U	-0.1446	8.99932	8.85476	0.04284
ENSMUSG00000042388	Dlgap3	DLG associated protein 3	0.2173	8.21088	8.42814	0.04306
ENSMUSG00000036782	Klhl13	kelch-like 13	0.408	4.66457	5.07254	0.04347
ENSMUSG00000020591	Ntsr2	neurotensin receptor 2	-0.2841	7.54235	7.2583	0.04492
ENSMUSG00000071379	Hpcal1	hippocalcin-like 1	0.3859	5.43697	5.82282	0.04527
ENSMUSG00000042109	Csdc2	cold shock domain containing C2, RNA binding	0.2374	6.8611	7.09846	0.04569
ENSMUSG00000020732	Rab37	RAB37, member RAS oncogene family	0.7258	2.46292	3.18872	0.04576
ENSMUSG00000020388	Pdlim4	PDZ and LIM domain 4	-0.5983	4.40414	3.80579	0.04593
ENSMUSG00000037979	Ccdc92	coiled-coil domain containing 92	0.2543	6.57698	6.83131	0.04593
ENSMUSG00000030047	Arhgap25	Rho GTPase activating protein 25	-0.8111	3.55345	2.74235	0.04637
ENSMUSG00000022199	Slc22a17	solute carrier family 22 (organic cation transport...	0.1684	9.32737	9.49572	0.04677
ENSMUSG00000029245	Epha5	Eph receptor A5	-0.3122	6.62323	6.31101	0.0469
ENSMUSG00000028656	Cap1	cyclase associated actin cytoskeleton regulatory p...	-0.1885	8.32646	8.13791	0.04798
ENSMUSG00000001313	Rnd2	Rho family GTPase 2	0.4184	6.07582	6.49427	0.04807
ENSMUSG00000022054	Nefm	neurofilament, medium polypeptide	0.2903	7.67137	7.96166	0.04828
ENSMUSG00000020723	Cacng4	calcium channel, voltage-dependent, gamma subunit ...	0.3998	5.26555	5.66539	0.04942
ENSMUSG00000026822	Lcn2	lipocalin 2	-1.274	2.35008	1.07611	0.04954
ENSMUSG00000062372	Otof	otoferlin	0.6476	3.35066	3.9983	0.04964
ENSMUSG00000005373	Mlxipl	MLX interacting protein-like	-0.7539	3.78568	3.03176	0.04978
ENSMUSG00000022831	Hcls1	hematopoietic cell specific Lyn substrate 1	-0.6729	4.01417	3.34126	0.0499
ENSMUSG00000037321	Tap1	transporter 1, ATP-binding cassette, sub-family B ...	-0.718	3.69323	2.97524	0.05018
ENSMUSG00000030350	Prmt8	protein arginine N-methyltransferase 8	0.3425	5.74934	6.09182	0.05089
ENSMUSG00000020917	Acly	ATP citrate lyase	0.2111	7.07459	7.28565	0.05162
ENSMUSG00000020657	Dnajc27	DnaJ heat shock protein family (Hsp40) member C27	0.227	6.8492	7.0762	0.05167
ENSMUSG00000000296	Tpd52l1	tumor protein D52-like 1	0.4639	4.4531	4.91702	0.05224
ENSMUSG00000055866	Per2	period circadian clock 2	0.3699	5.41558	5.78544	0.05275
ENSMUSG00000061762	Tac1	tachykinin 1	0.7085	3.09443	3.80298	0.05284
ENSMUSG00000058441	Panx2	pannexin 2	0.2339	7.02782	7.2617	0.05406
ENSMUSG00000075224	Lrrc55	leucine rich repeat containing 55	0.4976	3.90694	4.4045	0.05418
ENSMUSG00000074896	Ifit3	interferon-induced protein with tetratricopeptide ...	-0.7124	5.11025	4.3978	0.05456
ENSMUSG00000027350	Chgb	chromogranin B	-0.2514	9.83385	9.58245	0.0548
ENSMUSG00000025400	Tac2	tachykinin 2	0.7214	2.42828	3.14969	0.05598
ENSMUSG00000022763	Aifm3	apoptosis-inducing factor, mitochondrion-associate...	0.256	6.90437	7.16032	0.05609
ENSMUSG00000059409	Ppp2r5d	protein phosphatase 2, regulatory subunit B', delt...	0.216	6.96835	7.18435	0.05613
ENSMUSG00000042228	Lyn	LYN proto-oncogene, Src family tyrosine kinase	-0.6479	4.16788	3.52001	0.05644
ENSMUSG00000060938	Rpl26	ribosomal protein L26	-0.3476	7.62651	7.27888	0.05695
ENSMUSG00000049044	Rapgef4	Rap guanine nucleotide exchange factor (GEF) 4	0.2367	8.58106	8.81778	0.05695
ENSMUSG00000036885	Arhgef26	Rho guanine nucleotide exchange factor 26	-0.3365	6.06165	5.7252	0.0572
ENSMUSG00000022148	Fyb1	FYN binding protein 1	-0.6078	4.04212	3.43429	0.05726
ENSMUSG00000018381	Abi3	ABI family member 3	-0.7188	3.76753	3.04871	0.058
ENSMUSG00000032826	Ank2	ankyrin 2, brain	-0.1481	9.41817	9.27012	0.05835
ENSMUSG00000038370	Pcp4l1	Purkinje cell protein 4-like 1	0.59	6.2745	6.86453	0.05899
ENSMUSG00000020396	Nefh	neurofilament, heavy polypeptide	0.4404	6.438	6.87841	0.05899
ENSMUSG00000037697	Ddhd1	DDHD domain containing 1	-0.3125	6.88888	6.5764	0.05899
ENSMUSG00000078202	Nrarp	Notch-regulated ankyrin repeat protein	0.5779	3.81286	4.39078	0.05934
ENSMUSG00000048240	Gng7	guanine nucleotide binding protein (G protein), ga...	0.407	7.43304	7.84009	0.05991
ENSMUSG00000036699	Zcchc12	zinc finger, CCHC domain containing 12	0.5117	5.75574	6.26747	0.06058
ENSMUSG00000021750	Fam107a	family with sequence similarity 107, member A	-0.2562	9.11341	8.85719	0.06058
ENSMUSG00000004187	Kifc2	kinesin family member C2	0.1446	9.13311	9.27769	0.06073
ENSMUSG00000024737	Slc15a3	solute carrier family 15, member 3	-0.9572	3.23138	2.27421	0.06083
ENSMUSG00000020176	Grb10	growth factor receptor bound protein 10	0.3642	5.29418	5.65835	0.06137
ENSMUSG00000030605	Mfge8	milk fat globule EGF and factor V/VIII domain cont...	0.3254	7.04928	7.37473	0.06177
ENSMUSG00000073409	H2-Q6	histocompatibility 2, Q region locus 6	-0.8956	2.99638	2.10078	0.06211
ENSMUSG00000030500	Slc17a6	solute carrier family 17 (sodium-dependent inorgan...	0.8764	4.0219	4.89825	0.06262
ENSMUSG00000034245	Hdac11	histone deacetylase 11	0.1812	7.90755	8.08874	0.06262
ENSMUSG00000062785	Kcnc3	potassium voltage gated channel, Shaw-related subf...	0.3148	7.44698	7.7618	0.06278
ENSMUSG00000031328	Flna	filamin, alpha	-0.2252	7.22584	7.00061	0.06365
ENSMUSG00000026238	Ptma	prothymosin alpha	-0.1991	7.94157	7.74252	0.06365
ENSMUSG00000031447	Lamp1	lysosomal-associated membrane protein 1	-0.2543	8.74812	8.49386	0.06382
ENSMUSG00000018474	Chd3	chromodomain helicase DNA binding protein 3	0.1687	9.45664	9.62535	0.06397
ENSMUSG00000004366	Sst	somatostatin	-0.3151	7.91811	7.60298	0.06438
ENSMUSG00000009585	Apobec3	apolipoprotein B mRNA editing enzyme, catalytic po...	-0.7367	3.49688	2.76022	0.06498
ENSMUSG00000020178	Adora2a	adenosine A2a receptor	1.276	1.63889	2.91521	0.06509
ENSMUSG00000033685	Ucp2	uncoupling protein 2 (mitochondrial, proton carrie...	-0.4493	6.15744	5.70815	0.0658
ENSMUSG00000030270	Cpne9	copine family member IX	0.5872	4.8205	5.40768	0.06803
ENSMUSG00000000202	Btbd17	BTB domain containing 17	0.6016	3.3232	3.9248	0.06808
ENSMUSG00000039405	Prss23	serine protease 23	-0.5833	4.37369	3.79035	0.06808
ENSMUSG00000038776	Ephx1	epoxide hydrolase 1, microsomal	-0.3738	5.67819	5.3044	0.06868
ENSMUSG00000020599	Rgs9	regulator of G-protein signaling 9	0.7303	3.9336	4.66394	0.06873
ENSMUSG00000030854	Ptpn5	protein tyrosine phosphatase, non-receptor type 5	0.3103	7.51264	7.82289	0.06873
ENSMUSG00000060240	Cend1	cell cycle exit and neuronal differentiation 1	0.2031	8.33088	8.53393	0.06873
ENSMUSG00000022594	Lynx1	Ly6/neurotoxin 1	0.1717	8.71927	8.89094	0.06873
ENSMUSG00000022961	Son	Son DNA binding protein	-0.1536	8.85898	8.70539	0.06903
ENSMUSG00000049225	Pdp1	pyruvate dehydrogenase phosphatase catalytic subun...	0.414	5.76861	6.18256	0.0691
ENSMUSG00000027848	Olfml3	olfactomedin-like 3	-0.4845	5.27688	4.79234	0.06971
ENSMUSG00000055945	Prr18	proline rich 18	0.4254	6.02652	6.45197	0.07038
ENSMUSG00000046922	Gpr6	G protein-coupled receptor 6	0.73	1.10652	1.83654	0.07087
ENSMUSG00000021032	Ngb	neuroglobin	0.9119	1.78991	2.70186	0.07186
ENSMUSG00000061718	Ppp1r1b	protein phosphatase 1, regulatory inhibitor subuni...	0.7787	6.1307	6.90944	0.07227
ENSMUSG00000001435	Col18a1	collagen, type XVIII, alpha 1	0.7269	2.74855	3.47542	0.07246
ENSMUSG00000026158	Ogfrl1	opioid growth factor receptor-like 1	0.1953	7.30444	7.49972	0.07246
ENSMUSG00000036617	Etl4	enhancer trap locus 4	-0.3357	6.39304	6.05733	0.07266
ENSMUSG00000006651	Aplp1	amyloid beta precursor like protein 1	0.1047	10.4357	10.5403	0.07434
ENSMUSG00000025931	Paqr8	progestin and adipoQ receptor family member VIII	0.2275	7.10196	7.32943	0.07471
ENSMUSG00000020777	Acox1	acyl-Coenzyme A oxidase 1, palmitoyl	-0.1603	7.91333	7.75302	0.07471
ENSMUSG00000021948	Prkcd	protein kinase C, delta	0.6794	5.54464	6.22409	0.07631
ENSMUSG00000056596	Trnp1	TMF1-regulated nuclear protein 1	0.2366	6.98262	7.2192	0.07667
ENSMUSG00000058297	Spock2	sparc/osteonectin, cwcv and kazal-like domains pro...	0.1861	9.79525	9.98131	0.07785
ENSMUSG00000006740	Kif5b	kinesin family member 5B	0.1815	7.73865	7.92018	0.07882
ENSMUSG00000034730	Adgrb1	adhesion G protein-coupled receptor B1	0.1735	8.9482	9.12168	0.07922
ENSMUSG00000032372	Plscr2	phospholipid scramblase 2	-0.9124	2.99448	2.08209	0.07926
ENSMUSG00000026494	Kif26b	kinesin family member 26B	0.4857	4.22459	4.71034	0.07926
ENSMUSG00000030337	Vamp1	vesicle-associated membrane protein 1	0.4113	7.08526	7.49656	0.08006
ENSMUSG00000021848	Otx2	orthodenticle homeobox 2	1.226	1.81959	3.04575	0.08071
ENSMUSG00000029778	Adcyap1r1	adenylate cyclase activating polypeptide 1 recepto...	0.1912	7.69296	7.88416	0.08113
ENSMUSG00000001366	Fbxo9	f-box protein 9	0.261	6.12914	6.39013	0.08156
ENSMUSG00000027834	Serpini1	serine (or cysteine) peptidase inhibitor, clade I,...	-0.336	7.57739	7.24137	0.08173
ENSMUSG00000051439	Cd14	CD14 antigen	-0.9071	3.17724	2.27018	0.08201
ENSMUSG00000023017	Asic1	acid-sensing ion channel 1	0.3506	5.27303	5.62366	0.08208
ENSMUSG00000028753	Vwa5b1	von Willebrand factor A domain containing 5B1	0.8124	2.38421	3.1966	0.08363
ENSMUSG00000033721	Vav3	vav 3 oncogene	0.5602	3.26519	3.8254	0.08464
ENSMUSG00000032231	Anxa2	annexin A2	-0.5284	4.48308	3.95468	0.0849
ENSMUSG00000014846	Tppp3	tubulin polymerization-promoting protein family me...	0.4077	5.26261	5.67026	0.0849
ENSMUSG00000034390	Cmip	c-Maf inducing protein	-0.1765	8.43243	8.25596	0.08549
ENSMUSG00000061740	Cyp2d22	cytochrome P450, family 2, subfamily d, polypeptid...	-0.3057	5.91009	5.60435	0.08636
ENSMUSG00000052374	Actn2	actinin alpha 2	0.4601	4.08473	4.54485	0.08697
ENSMUSG00000030077	Chl1	cell adhesion molecule L1-like	-0.2875	7.1636	6.87608	0.08723
ENSMUSG00000011884	Gltp	glycolipid transfer protein	-0.3243	6.0577	5.73341	0.08955
ENSMUSG00000036915	Kirrel2	kirre like nephrin family adhesion molecule 2	0.6491	2.84237	3.49149	0.09114
ENSMUSG00000044786	Zfp36	zinc finger protein 36	-0.6521	3.92925	3.27712	0.09138
ENSMUSG00000028207	Asph	aspartate-beta-hydroxylase	-0.2383	6.81362	6.57534	0.09281
ENSMUSG00000045349	Sh2d5	SH2 domain containing 5	0.2673	6.33324	6.60056	0.0936
ENSMUSG00000043388	Tmem130	transmembrane protein 130	0.3032	7.55703	7.8602	0.09384
ENSMUSG00000029925	Tbxas1	thromboxane A synthase 1, platelet	-0.8339	3.15035	2.31642	0.09413
ENSMUSG00000034116	Vav1	vav 1 oncogene	-0.6978	3.57885	2.88104	0.09413
ENSMUSG00000024339	Tap2	transporter 2, ATP-binding cassette, sub-family B ...	-0.4985	4.4908	3.99232	0.09413
ENSMUSG00000045136	Tubb2b	tubulin, beta 2B class IIB	-0.2506	7.69355	7.44291	0.09413
ENSMUSG00000038555	Reep2	receptor accessory protein 2	0.2105	7.04466	7.25519	0.09413
ENSMUSG00000046432	Bex3	brain expressed X-linked 3	0.1916	7.4536	7.64525	0.09413
ENSMUSG00000024378	Stard4	StAR related lipid transfer domain containing 4	0.5233	3.84586	4.36914	0.09546
ENSMUSG00000027327	Adissp	adipose secreted signaling protein	0.3506	5.21407	5.5647	0.0955
ENSMUSG00000010064	Slc38a3	solute carrier family 38, member 3	-0.3096	6.85787	6.54826	0.09588
ENSMUSG00000059552	Trp53	transformation related protein 53	-0.363	5.41716	5.05421	0.09606
ENSMUSG00000028248	Pnisr	PNN interacting serine/arginine-rich	-0.1588	8.25908	8.10025	0.09669
ENSMUSG00000015947	Fcgr1	Fc receptor, IgG, high affinity I	-0.7988	3.39876	2.59993	0.09696
ENSMUSG00000020101	Vsir	V-set immunoregulatory receptor	-0.3524	5.51894	5.16659	0.09696
ENSMUSG00000038319	Kcnh2	potassium voltage-gated channel, subfamily H (eag-...	0.3479	5.01151	5.35937	0.09696
ENSMUSG00000030707	Coro1a	coronin, actin binding protein 1A	-0.2507	6.67491	6.42419	0.09804
ENSMUSG00000031970	Dbndd1	dysbindin domain containing 1	0.5376	3.44263	3.98026	0.09838
ENSMUSG00000031610	Scrg1	scrapie responsive gene 1	-0.4126	5.12179	4.70923	0.09845
ENSMUSG00000024816	Frmd8	FERM domain containing 8	-0.3953	5.31643	4.92111	0.09845
ENSMUSG00000039515	Ptpa	protein phosphatase 2 protein activator	0.1726	7.5652	7.73785	0.09845
ENSMUSG00000020644	Id2	inhibitor of DNA binding 2	-0.2761	6.30115	6.02504	0.09858
ENSMUSG00000074151	Nlrc5	NLR family, CARD domain containing 5	-0.8717	2.6669	1.79518	0.1015
ENSMUSG00000039103	Nexn	nexilin	0.6145	1.67408	2.28854	0.1015
ENSMUSG00000060126	Tpt1	tumor protein, translationally-controlled 1	-0.2158	8.55155	8.33578	0.1016
ENSMUSG00000053175	Bcl3	B cell leukemia/lymphoma 3	-1.099	2.18911	1.09001	0.1025
ENSMUSG00000002111	Spi1	Spi-1 proto-oncogene	-0.7371	3.37503	2.63795	0.1029
ENSMUSG00000017677	Wsb1	WD repeat and SOCS box-containing 1	-0.2215	7.0844	6.86293	0.1029
ENSMUSG00000022094	Slc39a14	solute carrier family 39 (zinc transporter), membe...	-0.3203	5.7874	5.46713	0.1032
ENSMUSG00000006575	Rundc3a	RUN domain containing 3A	0.1341	8.57117	8.70525	0.1032
ENSMUSG00000055541	Lair1	leukocyte-associated Ig-like receptor 1	-0.5927	4.08533	3.49263	0.1034
ENSMUSG00000019966	Kitl	kit ligand	0.4597	4.05904	4.5187	0.1036
ENSMUSG00000025510	Cd151	CD151 antigen	-0.3877	5.11885	4.73119	0.1036
ENSMUSG00000032261	Sh3bgrl2	SH3 domain binding glutamic acid-rich protein like...	0.3709	4.70138	5.07231	0.1036
ENSMUSG00000022416	Cacna1i	calcium channel, voltage-dependent, alpha 1I subun...	0.2781	6.08434	6.36242	0.1036
ENSMUSG00000037235	Mxd4	Max dimerization protein 4	0.2564	6.28186	6.53826	0.1036
ENSMUSG00000029465	Arpc3	actin related protein 2/3 complex, subunit 3	-0.2028	7.2345	7.0317	0.1036
ENSMUSG00000031824	6430548M08Rik	RIKEN cDNA 6430548M08 gene	0.1565	7.97044	8.12689	0.1036
ENSMUSG00000032596	Uba7	ubiquitin-like modifier activating enzyme 7	-0.6657	3.62807	2.96233	0.1039
ENSMUSG00000022180	Slc7a8	solute carrier family 7 (cationic amino acid trans...	-0.2156	7.00441	6.7888	0.1041
ENSMUSG00000040264	Gbp2b	guanylate binding protein 2b	-0.6941	3.51722	2.82313	0.1045
ENSMUSG00000021743	Fezf2	Fez family zinc finger 2	-0.651	5.49027	4.83927	0.1046
ENSMUSG00000015484	Fam163a	family with sequence similarity 163, member A	0.5434	3.68337	4.22679	0.105
ENSMUSG00000030844	Rgs10	regulator of G-protein signalling 10	-0.3644	5.51395	5.14957	0.105
ENSMUSG00000023011	Faim2	Fas apoptotic inhibitory molecule 2	0.1419	9.16048	9.30238	0.1063
ENSMUSG00000054871	Tmem158	transmembrane protein 158	0.4205	4.37848	4.79901	0.1068
ENSMUSG00000030717	Nupr1	nuclear protein transcription regulator 1	-0.66	3.65578	2.99583	0.1071
ENSMUSG00000040483	Xaf1	XIAP associated factor 1	-0.5875	3.78022	3.19272	0.1071
ENSMUSG00000029468	P2rx7	purinergic receptor P2X, ligand-gated ion channel,...	-0.5133	4.36905	3.85571	0.1071
ENSMUSG00000002012	Pnck	pregnancy upregulated non-ubiquitously expressed C...	0.2828	6.18967	6.47244	0.1071
ENSMUSG00000043670	Diras1	DIRAS family, GTP-binding RAS-like 1	0.2178	7.01147	7.2293	0.1071
ENSMUSG00000037747	Phyhipl	phytanoyl-CoA hydroxylase interacting protein-like	-0.1903	7.6766	7.48628	0.1071
ENSMUSG00000018293	Pfn1	profilin 1	-0.1788	7.57933	7.40053	0.1071
ENSMUSG00000032679	Cd59a	CD59a antigen	0.6441	3.16756	3.81162	0.1081
ENSMUSG00000013275	Slc41a1	solute carrier family 41, member 1	-0.2327	6.83518	6.60247	0.1087
ENSMUSG00000031838	Ifi30	interferon gamma inducible protein 30	-0.6766	3.45149	2.77494	0.1094
ENSMUSG00000070304	Scn2b	sodium channel, voltage-gated, type II, beta	0.1521	8.08506	8.2372	0.1102
ENSMUSG00000027248	Pdia3	protein disulfide isomerase associated 3	-0.1686	7.73412	7.56556	0.1105
ENSMUSG00000025498	Irf7	interferon regulatory factor 7	-0.7422	3.23143	2.48928	0.1108
ENSMUSG00000028128	F3	coagulation factor III	-0.2901	5.95419	5.66409	0.1108
ENSMUSG00000020282	Rhbdf1	rhomboid 5 homolog 1	-0.4498	4.94648	4.49668	0.1113
ENSMUSG00000001520	Nrip2	nuclear receptor interacting protein 2	0.3815	4.57805	4.95953	0.1113
ENSMUSG00000044024	Rell2	RELT-like 2	0.2131	6.96086	7.17392	0.1113
ENSMUSG00000066357	Wdr6	WD repeat domain 6	0.2699	7.43304	7.70292	0.1124
ENSMUSG00000002006	Pdzd4	PDZ domain containing 4	0.1919	7.07901	7.27094	0.113
ENSMUSG00000036882	Arhgap33	Rho GTPase activating protein 33	0.2481	7.06169	7.30981	0.1136
ENSMUSG00000028691	Prdx1	peroxiredoxin 1	-0.2119	7.16206	6.95014	0.1137
ENSMUSG00000025534	Gusb	glucuronidase, beta	-0.4747	4.78769	4.313	0.1154
ENSMUSG00000049339	Retreg2	reticulophagy regulator family member 2	0.1704	7.52242	7.69283	0.1154
ENSMUSG00000048978	Nrsn1	neurensin 1	0.1656	8.13018	8.29573	0.1154
ENSMUSG00000013076	Amotl1	angiomotin-like 1	0.4693	4.96597	5.43532	0.1156
ENSMUSG00000025504	Eps8l2	EPS8-like 2	0.7104	2.61386	3.32428	0.116
ENSMUSG00000022075	Rhobtb2	Rho-related BTB domain containing 2	0.2487	6.36185	6.61053	0.1169
ENSMUSG00000036737	Oxsr1	oxidative-stress responsive 1	0.238	6.43357	6.67158	0.1177
ENSMUSG00000030878	Cdr2	cerebellar degeneration-related 2	0.5322	3.72081	4.25299	0.1188
ENSMUSG00000033061	Resp18	regulated endocrine-specific protein 18	0.4845	5.42888	5.91341	0.1193
ENSMUSG00000026864	Hspa5	heat shock protein 5	0.2025	7.80625	8.00875	0.1197
ENSMUSG00000019772	Vip	vasoactive intestinal polypeptide	-0.517	4.40494	3.88797	0.1199
ENSMUSG00000024998	Plce1	phospholipase C, epsilon 1	-0.4603	4.84416	4.38387	0.1199
ENSMUSG00000036854	Hspb6	heat shock protein, alpha-crystallin-related, B6	-0.5755	4.04774	3.47223	0.1204
ENSMUSG00000078137	Ankrd63	ankyrin repeat domain 63	0.4342	4.1947	4.62895	0.1214
ENSMUSG00000020953	Coch	cochlin	0.6435	2.57432	3.21783	0.1219
ENSMUSG00000022390	Zc3h7b	zinc finger CCCH type containing 7B	0.1498	7.84906	7.99887	0.1219
ENSMUSG00000024429	Gnl1	guanine nucleotide binding protein-like 1	0.167	7.52316	7.69017	0.1229
ENSMUSG00000036777	Anln	anillin, actin binding protein	0.3947	5.13401	5.5287	0.1232
ENSMUSG00000030029	Lrig1	leucine-rich repeats and immunoglobulin-like domai...	-0.4106	5.74994	5.3393	0.1239
ENSMUSG00000032735	Ablim3	actin binding LIM protein family, member 3	0.3376	5.26081	5.59844	0.1242
ENSMUSG00000043857	Mgat5b	mannoside acetylglucosaminyltransferase 5, isoenzy...	0.2693	6.01897	6.28831	0.1242
ENSMUSG00000035901	Dennd5a	DENN domain containing 5A	0.1377	8.34369	8.48138	0.1242
ENSMUSG00000036466	Megf11	multiple EGF-like-domains 11	0.5081	3.76975	4.27787	0.1246
ENSMUSG00000023236	Scg5	secretogranin V	0.2289	7.44829	7.67717	0.1246
ENSMUSG00000022619	Mapk8ip2	mitogen-activated protein kinase 8 interacting pro...	0.1311	8.45049	8.58155	0.1246
ENSMUSG00000026475	Rgs16	regulator of G-protein signaling 16	0.555	3.49058	4.04556	0.1253
ENSMUSG00000032517	Mobp	myelin-associated oligodendrocytic basic protein	0.4133	10.3503	10.7636	0.126
ENSMUSG00000062184	Hs6st2	heparan sulfate 6-O-sulfotransferase 2	0.4234	4.35042	4.77381	0.1279
ENSMUSG00000035376	Hacd2	3-hydroxyacyl-CoA dehydratase 2	-0.3335	5.50759	5.17408	0.1279
ENSMUSG00000042116	Vwa1	von Willebrand factor A domain containing 1	-0.3937	5.29843	4.90472	0.1284
ENSMUSG00000067274	Rplp0	ribosomal protein lateral stalk subunit P0	-0.1767	7.81029	7.63355	0.1284
ENSMUSG00000057455	Rit2	Ras-like without CAAX 2	0.2904	5.8673	6.15765	0.1301
ENSMUSG00000022272	Myo10	myosin X	-0.2858	5.95123	5.66538	0.1318
ENSMUSG00000020949	Fkbp3	FK506 binding protein 3	0.2124	6.65444	6.86684	0.1318
ENSMUSG00000026202	Tuba4a	tubulin, alpha 4A	0.1154	8.80898	8.92435	0.1318
ENSMUSG00000031654	Cbln1	cerebellin 1 precursor protein	0.8181	3.24042	4.05852	0.1332
ENSMUSG00000048960	Prex2	phosphatidylinositol-3,4,5-trisphosphate-dependent...	-0.2914	5.95984	5.66845	0.1346
ENSMUSG00000024965	Fermt3	fermitin family member 3	-0.7115	3.58973	2.87823	0.1351
ENSMUSG00000015944	Castor2	cytosolic arginine sensor for mTORC1 subunit 2	0.1808	7.30299	7.48382	0.1351
ENSMUSG00000010825	Grid2ip	glutamate receptor, ionotropic, delta 2 (Grid2) in...	0.7741	1.80039	2.57452	0.1356
ENSMUSG00000026991	Pkp4	plakophilin 4	0.1943	8.70257	8.89691	0.1359
ENSMUSG00000059361	Nrsn2	neurensin 2	0.3341	6.61595	6.95003	0.1366
ENSMUSG00000036606	Plxnb2	plexin B2	-0.2361	6.9078	6.67168	0.1374
ENSMUSG00000042873	Lhfpl4	lipoma HMGIC fusion partner-like protein 4	0.1821	7.13634	7.31849	0.1378
ENSMUSG00000004032	Gstm5	glutathione S-transferase, mu 5	0.2054	7.10999	7.31536	0.1382
ENSMUSG00000037306	Man1c1	mannosidase, alpha, class 1C, member 1	-0.3146	5.62555	5.31094	0.1397
ENSMUSG00000026347	Tmem163	transmembrane protein 163	0.5362	3.22612	3.76236	0.1409
ENSMUSG00000075415	Fnbp1	formin binding protein 1	-0.1886	8.0036	7.81499	0.141
ENSMUSG00000048001	Hes5	hes family bHLH transcription factor 5	0.6716	2.50809	3.17971	0.1413
ENSMUSG00000031659	Adcy7	adenylate cyclase 7	-0.6807	3.98382	3.30313	0.1414
ENSMUSG00000045312	Lhfpl2	lipoma HMGIC fusion partner-like 2	-0.3716	5.32017	4.94852	0.1414
ENSMUSG00000015981	Stk32c	serine/threonine kinase 32C	0.24	6.40667	6.64669	0.1414
ENSMUSG00000042816	Gpr151	G protein-coupled receptor 151	0.7684	1.0717	1.84012	0.1421
ENSMUSG00000098112	Bin2	bridging integrator 2	-0.551	4.06582	3.51486	0.1427
ENSMUSG00000022354	Ndufb9	NADH:ubiquinone oxidoreductase subunit B9	0.1878	7.24064	7.42842	0.1427
ENSMUSG00000021371	Mcur1	mitochondrial calcium uniporter regulator 1	-0.3789	5.29385	4.91493	0.1436
ENSMUSG00000015950	Ncf1	neutrophil cytosolic factor 1	-0.5053	4.24735	3.74209	0.1439
ENSMUSG00000062380	Tubb3	tubulin, beta 3 class III	0.2757	8.00773	8.28346	0.144
ENSMUSG00000037989	Wnk2	WNK lysine deficient protein kinase 2	0.1829	7.17265	7.35555	0.144
ENSMUSG00000032120	C2cd2l	C2 calcium-dependent domain containing 2-like	0.1767	7.49925	7.67598	0.1461
ENSMUSG00000032238	Rora	RAR-related orphan receptor alpha	0.3851	5.01106	5.39621	0.1468
ENSMUSG00000049907	Rasl11b	RAS-like, family 11, member B	-0.3718	6.05573	5.68394	0.1484
ENSMUSG00000038872	Zfhx3	zinc finger homeobox 3	0.5046	3.04484	3.54941	0.1489
ENSMUSG00000034709	Ppp1r21	protein phosphatase 1, regulatory subunit 21	0.2467	6.62966	6.87633	0.1489
ENSMUSG00000024665	Fads2	fatty acid desaturase 2	0.2231	6.71336	6.93643	0.1489
ENSMUSG00000016356	Col20a1	collagen, type XX, alpha 1	-0.5473	4.00944	3.46211	0.1491
ENSMUSG00000022842	Ece2	endothelin converting enzyme 2	0.2986	5.56211	5.86069	0.1492
ENSMUSG00000010080	Epn3	epsin 3	0.7827	2.2147	2.99738	0.1501
ENSMUSG00000094910	D430019H16Rik	RIKEN cDNA D430019H16 gene	0.3004	7.09688	7.3973	0.1503
ENSMUSG00000020363	Gfpt2	glutamine fructose-6-phosphate transaminase 2	-0.6251	3.81058	3.18548	0.1508
ENSMUSG00000021248	Tmed10	transmembrane p24 trafficking protein 10	-0.1805	7.29205	7.11151	0.1508
ENSMUSG00000032908	Sgpp2	sphingosine-1-phosphate phosphatase 2	0.4232	3.50734	3.93056	0.1509
ENSMUSG00000066438	Plekhd1	pleckstrin homology domain containing, family D (w...	0.559	2.98191	3.54089	0.1519
ENSMUSG00000039278	Pcsk1n	proprotein convertase subtilisin/kexin type 1 inhi...	0.349	8.47953	8.82852	0.1535
ENSMUSG00000040663	Clcf1	cardiotrophin-like cytokine factor 1	-0.8898	2.66521	1.77539	0.1545
ENSMUSG00000027878	Notch2	notch 2	-0.3654	5.55476	5.18937	0.1545
ENSMUSG00000061132	Blnk	B cell linker	-0.6179	3.62794	3.01002	0.1555
ENSMUSG00000020473	Aebp1	AE binding protein 1	-0.513	5.37257	4.85955	0.1557
ENSMUSG00000035686	Thrsp	thyroid hormone responsive	-0.3621	5.4663	5.10425	0.1564
ENSMUSG00000001891	Ugp2	UDP-glucose pyrophosphorylase 2	-0.2376	6.45703	6.21948	0.1564
ENSMUSG00000029516	Cit	citron	0.4604	6.51572	6.97614	0.1568
ENSMUSG00000020402	Vdac1	voltage-dependent anion channel 1	0.117	8.81699	8.93403	0.1569
ENSMUSG00000031980	Agt	angiotensinogen	0.577	5.07784	5.65484	0.1571
ENSMUSG00000000346	Dazap2	DAZ associated protein 2	-0.1777	7.43464	7.25693	0.1588
ENSMUSG00000021546	Hnrnpk	heterogeneous nuclear ribonucleoprotein K	-0.123	8.35741	8.23437	0.1593
ENSMUSG00000063873	Slc24a3	solute carrier family 24 (sodium/potassium/calcium...	0.1729	7.64508	7.81796	0.1594
ENSMUSG00000029053	Prkcz	protein kinase C, zeta	0.1531	7.63336	7.78646	0.1594
ENSMUSG00000026234	Ncl	nucleolin	-0.1288	8.54095	8.41218	0.1597
ENSMUSG00000000794	Kcnn3	potassium intermediate/small conductance calcium-a...	0.5018	3.55058	4.05237	0.1612
ENSMUSG00000039013	Siglecf	sialic acid binding Ig-like lectin F	-0.9925	2.38275	1.39023	0.1617
ENSMUSG00000024079	Eif2ak2	eukaryotic translation initiation factor 2-alpha k...	-0.5597	3.8015	3.24184	0.1625
ENSMUSG00000020889	Nr1d1	nuclear receptor subfamily 1, group D, member 1	-0.1981	7.35601	7.15788	0.163
ENSMUSG00000023456	Tpi1	triosephosphate isomerase 1	0.1196	9.13053	9.25013	0.1631
ENSMUSG00000041757	Plekha6	pleckstrin homology domain containing, family A me...	0.2483	6.82792	7.0762	0.1634
ENSMUSG00000001020	S100a4	S100 calcium binding protein A4	-0.9212	2.83419	1.91303	0.1636
ENSMUSG00000015002	Efr3a	EFR3 homolog A	-0.2078	7.1915	6.98374	0.1636
ENSMUSG00000029328	Hnrnpdl	heterogeneous nuclear ribonucleoprotein D-like	-0.1394	8.03149	7.89211	0.1662
ENSMUSG00000003949	Hlf	hepatic leukemia factor	0.2647	7.06176	7.3265	0.1665
ENSMUSG00000020680	Taf15	TATA-box binding protein associated factor 15	-0.2261	6.52887	6.30275	0.1669
ENSMUSG00000062488	Ifit3b	interferon-induced protein with tetratricopeptide ...	-0.5453	4.07238	3.52711	0.167
ENSMUSG00000022623	Shank3	SH3 and multiple ankyrin repeat domains 3	0.1922	7.95485	8.14702	0.1683
ENSMUSG00000038668	Lpar1	lysophosphatidic acid receptor 1	0.3471	5.1721	5.51916	0.1693
ENSMUSG00000026811	St6galnac6	ST6 (alpha-N-acetyl-neuraminyl-2,3-beta-galactosyl...	0.2009	6.81938	7.02028	0.1693
ENSMUSG00000002603	Tgfb1	transforming growth factor, beta 1	-0.5831	3.82973	3.24659	0.1704
ENSMUSG00000000056	Narf	nuclear prelamin A recognition factor	0.2904	5.47921	5.7696	0.1704
ENSMUSG00000026083	Eif5b	eukaryotic translation initiation factor 5B	-0.1755	7.24945	7.07395	0.1704
ENSMUSG00000027577	Chrna4	cholinergic receptor, nicotinic, alpha polypeptide...	0.375	5.03138	5.40636	0.1706
ENSMUSG00000051146	Camk2n2	calcium/calmodulin-dependent protein kinase II inh...	0.3675	6.15188	6.51939	0.1713
ENSMUSG00000023868	Pde10a	phosphodiesterase 10A	0.4411	6.1281	6.56919	0.173
ENSMUSG00000029994	Anxa4	annexin A4	-0.6071	3.58233	2.97524	0.1734
ENSMUSG00000028480	Glipr2	GLI pathogenesis-related 2	-0.6473	3.1965	2.54924	0.1735
ENSMUSG00000057113	Npm1	nucleophosmin 1	-0.1844	7.3198	7.13536	0.1738
ENSMUSG00000042726	Trafd1	TRAF type zinc finger domain containing 1	-0.2432	6.36568	6.12252	0.174
ENSMUSG00000027985	Lef1	lymphoid enhancer binding factor 1	0.4592	2.89728	3.35646	0.1755
ENSMUSG00000042182	Bend6	BEN domain containing 6	0.2919	6.66233	6.95423	0.1779
ENSMUSG00000072214	Septin5	septin 5	0.1643	9.4085	9.57277	0.1787
ENSMUSG00000040943	Tet2	tet methylcytosine dioxygenase 2	-0.2699	6.02007	5.75017	0.1797
ENSMUSG00000018417	Myo1b	myosin IB	0.4085	3.95578	4.36424	0.1809
ENSMUSG00000050953	Gja1	gap junction protein, alpha 1	-0.2227	7.81978	7.59704	0.1811
ENSMUSG00000006576	Slc4a3	solute carrier family 4 (anion exchanger), member ...	0.1943	7.37637	7.5707	0.1824
ENSMUSG00000019828	Grm1	glutamate receptor, metabotropic 1	0.2922	5.54937	5.84158	0.1827
ENSMUSG00000035314	Gdpd5	glycerophosphodiester phosphodiesterase domain con...	0.3479	4.60001	4.94787	0.1831
ENSMUSG00000021903	Galnt15	polypeptide N-acetylgalactosaminyltransferase 15	-0.6857	3.49325	2.80757	0.1834
ENSMUSG00000058709	Egln2	egl-9 family hypoxia-inducible factor 2	0.221	6.43757	6.65858	0.1834
ENSMUSG00000047021	Cfap65	cilia and flagella associated protein 65	0.5891	3.98295	4.57201	0.186
ENSMUSG00000052911	Lamb2	laminin, beta 2	-0.3068	5.64397	5.33716	0.1878
ENSMUSG00000014496	Ankrd28	ankyrin repeat domain 28	-0.2699	6.01211	5.74218	0.188
ENSMUSG00000021819	Zswim8	zinc finger SWIM-type containing 8	-0.1482	7.76256	7.61432	0.1884
ENSMUSG00000040312	Cchcr1	coiled-coil alpha-helical rod protein 1	-0.5726	3.77594	3.20332	0.1912
ENSMUSG00000016763	Scube1	signal peptide, CUB domain, EGF-like 1	0.3684	5.12246	5.49089	0.1916
ENSMUSG00000044288	Cnr1	cannabinoid receptor 1	-0.3134	7.47063	7.15719	0.1923
ENSMUSG00000017707	Serinc3	serine incorporator 3	-0.1379	7.99522	7.85734	0.1925
ENSMUSG00000040957	Cables1	CDK5 and Abl enzyme substrate 1	0.4092	4.33156	4.74076	0.194
ENSMUSG00000021476	Habp4	hyaluronic acid binding protein 4	0.1601	7.7411	7.90115	0.1945
ENSMUSG00000027074	Slc43a3	solute carrier family 43, member 3	-0.9438	2.61898	1.67515	0.1956
ENSMUSG00000036585	Fgf1	fibroblast growth factor 1	0.2716	5.94694	6.21849	0.1956
ENSMUSG00000029563	Foxp2	forkhead box P2	0.6489	1.74897	2.39786	0.1965
ENSMUSG00000030401	Rtn2	reticulon 2 (Z-band associated protein)	0.2304	6.23531	6.46572	0.1965
ENSMUSG00000031453	Rasa3	RAS p21 protein activator 3	-0.2085	6.75521	6.54674	0.1965
ENSMUSG00000032652	Crebl2	cAMP responsive element binding protein-like 2	0.3032	5.17465	5.47783	0.1969
ENSMUSG00000040037	Negr1	neuronal growth regulator 1	0.1998	6.72851	6.92828	0.1979
ENSMUSG00000038351	Sgsm2	small G protein signaling modulator 2	0.1979	7.05207	7.24999	0.1979
ENSMUSG00000030110	Ret	ret proto-oncogene	0.6395	2.3277	2.96715	0.1999
ENSMUSG00000035112	Wnk4	WNK lysine deficient protein kinase 4	0.6313	2.79715	3.42842	0.1999
ENSMUSG00000032220	Myo1e	myosin IE	-0.4204	4.68619	4.26581	0.1999
ENSMUSG00000031111	Igsf1	immunoglobulin superfamily, member 1	0.5271	3.27422	3.80131	0.2007
ENSMUSG00000025499	Hras	Harvey rat sarcoma virus oncogene	0.2041	6.63261	6.83675	0.2024
ENSMUSG00000022901	Cd86	CD86 antigen	-0.7938	2.89356	2.09981	0.2029
ENSMUSG00000046434	Hnrnpa1	heterogeneous nuclear ribonucleoprotein A1	-0.1372	7.86114	7.7239	0.2039
ENSMUSG00000035863	Palm	paralemmin	0.1664	7.73739	7.90374	0.2051
ENSMUSG00000032482	Cspg5	chondroitin sulfate proteoglycan 5	-0.161	8.20464	8.04363	0.2051
ENSMUSG00000055254	Ntrk2	neurotrophic tyrosine kinase, receptor, type 2	-0.1372	9.30594	9.16873	0.2051
ENSMUSG00000079298	Klrb1b	killer cell lectin-like receptor subfamily B membe...	-0.3952	0.87548	0.48029	0.206
ENSMUSG00000049723	Mmp12	matrix metallopeptidase 12	-0.3229	0.80749	0.48463	0.206
ENSMUSG00000035385	Ccl2	C-C motif chemokine ligand 2	-0.2428	0.7812	0.53842	0.206
ENSMUSG00000028362	Tnfsf8	tumor necrosis factor (ligand) superfamily, member...	-0.2237	0.72932	0.50561	0.206
ENSMUSG00000079014	Serpina3i	serine (or cysteine) peptidase inhibitor, clade A,...	-0.1822	0.68012	0.49794	0.206
ENSMUSG00000102037	Bcl2a1a	B cell leukemia/lymphoma 2 related protein A1a	-0.1776	0.7014	0.5238	0.206
ENSMUSG00000061436	Hipk2	homeodomain interacting protein kinase 2	0.2684	5.77106	6.03951	0.2072
ENSMUSG00000029769	Ccdc136	coiled-coil domain containing 136	0.3173	6.46671	6.78397	0.2074
ENSMUSG00000029211	Gabra4	gamma-aminobutyric acid type A receptor subunit al...	0.2259	6.18057	6.40643	0.2085
ENSMUSG00000040033	Stat2	signal transducer and activator of transcription 2	-0.2827	5.74549	5.46282	0.2098
ENSMUSG00000078161	Erich3	glutamate rich 3	0.3643	4.47274	4.83706	0.2107
ENSMUSG00000040183	Ankrd6	ankyrin repeat domain 6	0.3343	5.10166	5.43598	0.2109
ENSMUSG00000029823	Luc7l2	LUC7-like 2 (S. cerevisiae)	-0.1675	7.83374	7.66629	0.2112
ENSMUSG00000029875	Ccdc184	coiled-coil domain containing 184	0.3685	4.31333	4.68186	0.2115
ENSMUSG00000045427	Hnrnph2	heterogeneous nuclear ribonucleoprotein H2	-0.1804	7.0494	6.86904	0.2115
ENSMUSG00000055409	Nell1	NEL-like 1	0.2654	5.55148	5.81687	0.2135
ENSMUSG00000036565	Ttyh3	tweety family member 3	0.1418	7.93745	8.07923	0.2137
ENSMUSG00000047261	Gap43	growth associated protein 43	0.3307	7.32498	7.65572	0.2139
ENSMUSG00000079415	Cntf	ciliary neurotrophic factor	-0.7528	2.44222	1.68941	0.2145
ENSMUSG00000034459	Ifit1	interferon-induced protein with tetratricopeptide ...	-0.6366	3.11658	2.48	0.2145
ENSMUSG00000026880	Stom	stomatin	-0.4153	4.63916	4.2239	0.215
ENSMUSG00000020701	Tmem132e	transmembrane protein 132E	0.4391	3.58869	4.02776	0.2187
ENSMUSG00000010608	Rbm25	RNA binding motif protein 25	-0.1633	7.46273	7.29938	0.2187
ENSMUSG00000039579	Grin3a	glutamate receptor ionotropic, NMDA3A	0.3166	5.13716	5.45379	0.2196
ENSMUSG00000029436	Mmp17	matrix metallopeptidase 17	-0.3663	7.62993	7.26362	0.2201
ENSMUSG00000015850	Adamtsl4	ADAMTS-like 4	-0.4499	4.4863	4.0364	0.2224
ENSMUSG00000032452	Clstn2	calsyntenin 2	-0.2706	7.18748	6.91688	0.2226
ENSMUSG00000040385	Ppp1ca	protein phosphatase 1 catalytic subunit alpha	0.158	7.49815	7.65613	0.2232
ENSMUSG00000078853	Igtp	interferon gamma induced GTPase	-0.6043	3.27895	2.67462	0.2244
ENSMUSG00000026923	Notch1	notch 1	-0.3026	5.52643	5.22383	0.2246
ENSMUSG00000031841	Cdh13	cadherin 13	0.2549	5.78032	6.03524	0.225
ENSMUSG00000095098	Ccdc85b	coiled-coil domain containing 85B	0.2613	5.77264	6.03398	0.2262
ENSMUSG00000015568	Lpl	lipoprotein lipase	-0.4769	6.21192	5.73504	0.2264
ENSMUSG00000008140	Emc10	ER membrane protein complex subunit 10	0.18	7.58007	7.76012	0.2271
ENSMUSG00000040751	Lat2	linker for activation of T cells family, member 2	-0.7289	3.04886	2.31995	0.2275
ENSMUSG00000027533	Fabp5	fatty acid binding protein 5, epidermal	-0.2437	6.43197	6.18828	0.2276
ENSMUSG00000052512	Nav2	neuron navigator 2	-0.2046	6.71175	6.50719	0.2279
ENSMUSG00000040268	Plekha1	pleckstrin homology domain containing, family A (p...	-0.1849	6.93784	6.75291	0.2304
ENSMUSG00000030795	Fus	fused in sarcoma	-0.125	8.46034	8.33538	0.2305
ENSMUSG00000029088	Kcnip4	Kv channel interacting protein 4	0.263	5.73036	5.99331	0.2306
ENSMUSG00000030088	Aldh1l1	aldehyde dehydrogenase 1 family, member L1	-0.2365	6.47766	6.24119	0.2306
ENSMUSG00000090124	Ugt1a7c	UDP glucuronosyltransferase 1 family, polypeptide ...	-0.6294	3.2742	2.64482	0.2318
ENSMUSG00000027893	Ahcyl1	S-adenosylhomocysteine hydrolase-like 1	0.1164	8.58593	8.70237	0.2318
ENSMUSG00000060550	H2-Q7	histocompatibility 2, Q region locus 7	-0.8017	2.61784	1.81614	0.2325
ENSMUSG00000048779	P2ry6	pyrimidinergic receptor P2Y, G-protein coupled, 6	-0.6989	3.07145	2.37253	0.2325
ENSMUSG00000027716	Trpc3	transient receptor potential cation channel, subfa...	0.4843	2.84529	3.3296	0.2325
ENSMUSG00000041220	Elovl6	ELOVL fatty acid elongase 6	0.2674	5.60609	5.87349	0.2325
ENSMUSG00000029434	Vps33a	VPS33A CORVET/HOPS core subunit	0.1952	6.62191	6.81707	0.2325
ENSMUSG00000049550	Clip1	CAP-GLY domain containing linker protein 1	-0.1651	7.31537	7.15025	0.2325
ENSMUSG00000018909	Arrb1	arrestin, beta 1	0.1238	8.09545	8.21929	0.2325
ENSMUSG00000030161	Gabarapl1	GABA type A receptor associated protein like 1	0.09831	9.23954	9.33785	0.2325
ENSMUSG00000038026	Kcnj9	potassium inwardly-rectifying channel, subfamily J...	0.2791	6.81515	7.09429	0.2329
ENSMUSG00000020660	Pomc	pro-opiomelanocortin-alpha	0.6482	1.4911	2.13929	0.2337
ENSMUSG00000029119	Man2b2	mannosidase 2, alpha B2	-0.2623	5.86426	5.60198	0.2343
ENSMUSG00000022574	Naprt	nicotinate phosphoribosyltransferase	-0.5213	3.95263	3.43129	0.2346
ENSMUSG00000038718	Pbx3	pre B cell leukemia homeobox 3	0.4985	2.97301	3.47154	0.2359
ENSMUSG00000040624	Plekhg1	pleckstrin homology domain containing, family G (w...	0.3683	4.81436	5.18266	0.2361
ENSMUSG00000029826	Zc3hav1	zinc finger CCCH type, antiviral 1	-0.4862	4.21058	3.72441	0.2383
ENSMUSG00000024302	Dtna	dystrobrevin alpha	-0.164	7.18695	7.02292	0.2383
ENSMUSG00000022216	Psme1	proteasome (prosome, macropain) activator subunit ...	-0.2765	5.79008	5.51361	0.2389
ENSMUSG00000022332	Khdrbs3	KH domain containing, RNA binding, signal transduc...	-0.2166	7.60082	7.3842	0.2395
ENSMUSG00000019923	Zwint	ZW10 interactor	0.1874	9.41045	9.59783	0.2398
ENSMUSG00000032089	Il10ra	interleukin 10 receptor, alpha	-0.5493	3.60119	3.05187	0.2413
ENSMUSG00000034687	Fras1	Fraser extracellular matrix complex subunit 1	0.3758	4.44002	4.81582	0.2413
ENSMUSG00000019173	Rab5c	RAB5C, member RAS oncogene family	-0.1533	7.39129	7.23801	0.2429
ENSMUSG00000036427	Gpi1	glucose-6-phosphate isomerase 1	0.088	9.61942	9.70742	0.244
ENSMUSG00000020810	Cygb	cytoglobin	0.2126	6.36804	6.58065	0.2457
ENSMUSG00000040940	Arhgef1	Rho guanine nucleotide exchange factor 1	-0.2018	6.72431	6.52248	0.2457
ENSMUSG00000021823	Vcl	vinculin	-0.2542	5.96527	5.71109	0.2472
ENSMUSG00000039059	Hrh3	histamine receptor H3	0.2879	6.098	6.3859	0.249
ENSMUSG00000074093	Svip	small VCP/p97-interacting protein	0.2611	5.56477	5.82584	0.2494
ENSMUSG00000023809	Rps6ka2	ribosomal protein S6 kinase, polypeptide 2	0.2713	5.53692	5.80825	0.2502
ENSMUSG00000070000	Fcho1	FCH domain only 1	0.2132	6.49358	6.70682	0.2502
ENSMUSG00000020297	Nsg2	neuron specific gene family member 2	0.1115	9.47921	9.59074	0.2507
ENSMUSG00000025204	Ndufb8	NADH:ubiquinone oxidoreductase subunit B8	0.1802	6.93309	7.11331	0.2533
ENSMUSG00000055421	Pcdh9	protocadherin 9	-0.2352	6.40481	6.16961	0.2534
ENSMUSG00000033220	Rac2	Rac family small GTPase 2	-0.6587	3.16295	2.50429	0.2541
ENSMUSG00000010307	Tmem86a	transmembrane protein 86A	-0.4266	4.61184	4.18523	0.2541
ENSMUSG00000041141	Pnma8a	PNMA family member 8A	0.274	5.79944	6.07346	0.2541
ENSMUSG00000006356	Crip2	cysteine rich protein 2	-0.2526	6.51973	6.26717	0.2541
ENSMUSG00000025586	Cpeb1	cytoplasmic polyadenylation element binding protei...	-0.2021	6.81512	6.61302	0.2541
ENSMUSG00000030120	Mlf2	myeloid leukemia factor 2	0.1081	8.92509	9.03317	0.2541
ENSMUSG00000038112	AW551984	expressed sequence AW551984	0.6658	2.26395	2.92973	0.2557
ENSMUSG00000042671	Rgs8	regulator of G-protein signaling 8	0.2249	6.70927	6.93414	0.2561
ENSMUSG00000028917	Plekhm2	pleckstrin homology domain containing, family M (w...	0.165	7.08496	7.24992	0.2562
ENSMUSG00000055692	Tmem191	transmembrane protein 191	0.2058	6.52954	6.73537	0.2572
ENSMUSG00000001472	Tcf25	transcription factor 25 (basic helix-loop-helix)	0.1014	9.31938	9.42082	0.2599
ENSMUSG00000024013	Fgd2	FYVE, RhoGEF and PH domain containing 2	-0.5296	3.91086	3.38123	0.2601
ENSMUSG00000022790	Igsf11	immunoglobulin superfamily, member 11	-0.2709	5.68588	5.41502	0.2601
ENSMUSG00000001334	Fndc5	fibronectin type III domain containing 5	0.2094	6.57591	6.78535	0.2601
ENSMUSG00000033597	Caskin1	CASK interacting protein 1	0.1377	7.81613	7.95378	0.2603
ENSMUSG00000021219	Rgs6	regulator of G-protein signaling 6	0.365	4.43697	4.802	0.2609
ENSMUSG00000023927	Satb1	special AT-rich sequence binding protein 1	-0.3088	6.49382	6.18505	0.2613
ENSMUSG00000020135	Apc2	APC regulator of WNT signaling pathway 2	0.1571	7.37707	7.53419	0.2622
ENSMUSG00000034422	Parp14	poly (ADP-ribose) polymerase family, member 14	-0.6252	3.23702	2.6118	0.2641
ENSMUSG00000007850	Hnrnph1	heterogeneous nuclear ribonucleoprotein H1	-0.1366	8.22678	8.09019	0.2641
ENSMUSG00000026080	Chst10	carbohydrate sulfotransferase 10	0.2271	6.03383	6.26098	0.2643
ENSMUSG00000053819	Camk2d	calcium/calmodulin-dependent protein kinase II, de...	0.3557	5.68139	6.03713	0.2648
ENSMUSG00000006476	Nsmf	NMDA receptor synaptonuclear signaling and neurona...	0.1828	9.56953	9.75229	0.2648
ENSMUSG00000038115	Ano2	anoctamin 2	0.6786	2.07847	2.75706	0.265
ENSMUSG00000026247	Ecel1	endothelin converting enzyme-like 1	0.5185	2.99671	3.51522	0.265
ENSMUSG00000031375	Bgn	biglycan	-0.4146	4.74845	4.33381	0.2667
ENSMUSG00000035620	Ric8b	RIC8 guanine nucleotide exchange factor B	0.2932	5.0939	5.38712	0.2667
ENSMUSG00000021709	Erbin	Erbb2 interacting protein	-0.2522	7.21164	6.95942	0.2667
ENSMUSG00000053702	Nebl	nebulette	-0.2076	6.57093	6.36329	0.2667
ENSMUSG00000031066	Usp11	ubiquitin specific peptidase 11	0.1464	7.57394	7.72035	0.2671
ENSMUSG00000016559	H3f3b	H3.3 histone B	-0.1459	7.58655	7.44069	0.2676
ENSMUSG00000024304	Cdh2	cadherin 2	-0.209	6.63072	6.42169	0.2678
ENSMUSG00000035692	Isg15	ISG15 ubiquitin-like modifier	-0.7064	2.49353	1.78709	0.2686
ENSMUSG00000036502	Tmem255a	transmembrane protein 255A	0.3713	4.57439	4.94566	0.2686
ENSMUSG00000029095	Ablim2	actin-binding LIM protein 2	0.1652	7.12939	7.29459	0.2686
ENSMUSG00000000628	Hk2	hexokinase 2	-0.5549	3.75838	3.2035	0.2704
ENSMUSG00000096188	Cmtm4	CKLF-like MARVEL transmembrane domain containing 4	0.1862	6.7068	6.893	0.2737
ENSMUSG00000034595	Ppp1r18	protein phosphatase 1, regulatory subunit 18	-0.4468	4.23338	3.78654	0.2741
ENSMUSG00000026778	Prkcq	protein kinase C, theta	0.3907	3.91366	4.3044	0.2741
ENSMUSG00000021250	Fos	FBJ osteosarcoma oncogene	-0.401	5.0735	4.67248	0.2748
ENSMUSG00000027584	Oprl1	opioid receptor-like 1	0.2783	5.31501	5.5933	0.2748
ENSMUSG00000015355	Cd48	CD48 antigen	-0.9036	2.24189	1.33828	0.276
ENSMUSG00000062098	Btbd3	BTB domain containing 3	0.2226	7.4544	7.67701	0.2763
ENSMUSG00000057880	Abat	4-aminobutyrate aminotransferase	0.1886	8.10104	8.28962	0.2774
ENSMUSG00000035864	Syt1	synaptotagmin I	-0.1743	10.4623	10.288	0.2798
ENSMUSG00000026344	Lypd1	Ly6/Plaur domain containing 1	0.2216	6.25526	6.47689	0.2807
ENSMUSG00000021134	Srsf5	serine and arginine-rich splicing factor 5	-0.1408	8.58561	8.44482	0.2807
ENSMUSG00000052688	Rab7b	RAB7B, member RAS oncogene family	-0.8073	2.41267	1.60534	0.2824
ENSMUSG00000022106	Rcbtb2	regulator of chromosome condensation (RCC1) and BT...	-0.3125	5.14432	4.83186	0.2824
ENSMUSG00000006498	Ptbp1	polypyrimidine tract binding protein 1	-0.2596	5.80587	5.54625	0.2825
ENSMUSG00000035964	Tmem59l	transmembrane protein 59-like	-0.1438	8.23806	8.09428	0.2833
ENSMUSG00000036856	Wnt4	wingless-type MMTV integration site family, member...	0.4652	4.0251	4.49027	0.2839
ENSMUSG00000029840	Mtpn	myotrophin	-0.1597	7.87655	7.71684	0.2849
ENSMUSG00000022708	Zbtb20	zinc finger and BTB domain containing 20	-0.3486	7.96283	7.6142	0.2857
ENSMUSG00000000278	Scpep1	serine carboxypeptidase 1	-0.3977	4.56595	4.16825	0.2858
ENSMUSG00000025537	Phkg1	phosphorylase kinase gamma 1	-0.3161	5.21286	4.89679	0.2858
ENSMUSG00000079055	Slc8a3	solute carrier family 8 (sodium/calcium exchanger)...	0.3151	4.6074	4.92254	0.2858
ENSMUSG00000040659	Efhd2	EF hand domain containing 2	-0.1879	7.60053	7.41266	0.2858
ENSMUSG00000006273	Atp6v1b2	ATPase, H+ transporting, lysosomal V1 subunit B2	0.08851	9.23995	9.32846	0.2858
ENSMUSG00000031355	Arhgap6	Rho GTPase activating protein 6	0.641	2.56575	3.20679	0.2868
ENSMUSG00000039976	Tbc1d16	TBC1 domain family, member 16	0.2679	5.69387	5.96174	0.2868
ENSMUSG00000051851	Rtl8c	retrotransposon Gag like 8C	0.2214	6.41431	6.63568	0.2868
ENSMUSG00000041959	S100a10	S100 calcium binding protein A10 (calpactin)	-0.3863	4.56958	4.18324	0.2878
ENSMUSG00000032890	Rims3	regulating synaptic membrane exocytosis 3	0.4009	6.43627	6.83716	0.2882
ENSMUSG00000024330	Col11a2	collagen, type XI, alpha 2	-0.2487	6.07949	5.83083	0.2886
ENSMUSG00000074227	Spint2	serine protease inhibitor, Kunitz type 2	0.4776	4.27246	4.75003	0.289
ENSMUSG00000039680	Mrps6	mitochondrial ribosomal protein S6	-0.3374	5.05999	4.7226	0.2893
ENSMUSG00000034902	Pip5k1c	phosphatidylinositol-4-phosphate 5-kinase, type 1 ...	-0.1456	8.88016	8.73456	0.2903
ENSMUSG00000021156	Zmynd11	zinc finger, MYND domain containing 11	-0.1198	8.08879	7.96903	0.2903
ENSMUSG00000020848	Doc2b	double C2, beta	0.2928	6.45144	6.74422	0.2914
ENSMUSG00000046500	Tafa4	TAFA chemokine like family member 4	0.2538	0.54664	0.80048	0.2938
ENSMUSG00000063193	Cd300lb	CD300 molecule like family member B	-0.2261	0.66403	0.4379	0.2938
ENSMUSG00000028327	Stra6l	STRA6-like	-0.1913	0.66408	0.47278	0.2938
ENSMUSG00000027398	Il1b	interleukin 1 beta	-0.1445	0.63421	0.48974	0.2938
ENSMUSG00000037437	Adam32	a disintegrin and metallopeptidase domain 32	-0.03011	0.60135	0.57123	0.2938
ENSMUSG00000058498	Rnf207	ring finger protein 207	0.4334	3.63046	4.0639	0.2942
ENSMUSG00000026255	Efhd1	EF hand domain containing 1	0.3398	4.62538	4.96515	0.2942
ENSMUSG00000003573	Homer3	homer scaffolding protein 3	-0.4209	6.11797	5.69709	0.295
ENSMUSG00000029632	Ndufa4	Ndufa4, mitochondrial complex associated	0.1511	7.55652	7.70761	0.2951
ENSMUSG00000019843	Fyn	Fyn proto-oncogene	-0.1529	7.24976	7.09689	0.2956
ENSMUSG00000030287	Itpr2	inositol 1,4,5-triphosphate receptor 2	-0.323	5.14326	4.82029	0.2966
ENSMUSG00000006342	Susd2	sushi domain containing 2	0.4991	2.50922	3.0083	0.2975
ENSMUSG00000068742	Cry2	cryptochrome circadian regulator 2	0.1597	7.08298	7.24268	0.2986
ENSMUSG00000030772	Dkk3	dickkopf WNT signaling pathway inhibitor 3	-0.3784	8.60286	8.22449	0.2993
ENSMUSG00000040907	Atp1a3	ATPase, Na+/K+ transporting, alpha 3 polypeptide	0.1539	11.461	11.6149	0.3005
ENSMUSG00000026433	Rab29	RAB29, member RAS oncogene family	-0.6288	3.37667	2.74788	0.3009
ENSMUSG00000030921	Trim30a	tripartite motif-containing 30A	-0.6892	3.05002	2.36081	0.3035
ENSMUSG00000031665	Sall1	spalt like transcription factor 1	-0.3122	5.12291	4.8107	0.3036
ENSMUSG00000021097	Clmn	calmin	0.179	7.15396	7.33296	0.3039
ENSMUSG00000039197	Adk	adenosine kinase	-0.243	6.01045	5.7675	0.3041
ENSMUSG00000039809	Gabbr2	gamma-aminobutyric acid type B receptor subunit 2	0.1098	8.45696	8.56671	0.3041
ENSMUSG00000025453	Nnt	nicotinamide nucleotide transhydrogenase	0.322	4.94181	5.26378	0.3043
ENSMUSG00000037703	Lzts3	leucine zipper, putative tumor suppressor family m...	0.1735	7.84798	8.02143	0.3052
ENSMUSG00000035671	Zswim4	zinc finger SWIM-type containing 4	0.3234	4.79981	5.12323	0.3057
ENSMUSG00000089774	Slc5a3	solute carrier family 5 (inositol transporters), m...	-0.2944	5.43469	5.14032	0.3057
ENSMUSG00000027952	Pmvk	phosphomevalonate kinase	0.2826	5.12973	5.41237	0.3057
ENSMUSG00000020256	Aldh1l2	aldehyde dehydrogenase 1 family, member L2	-0.637	3.17437	2.53742	0.3072
ENSMUSG00000056917	Sipa1	signal-induced proliferation associated gene 1	-0.3608	4.79782	4.43706	0.3072
ENSMUSG00000002897	Il17ra	interleukin 17 receptor A	-0.4066	4.50983	4.10321	0.3143
ENSMUSG00000029050	Ski	ski sarcoma viral oncogene homolog (avian)	-0.1658	7.63589	7.47014	0.3143
ENSMUSG00000027288	Zfp106	zinc finger protein 106	0.1231	8.0757	8.19882	0.3143
ENSMUSG00000046182	Gsg1l	GSG1-like	0.3974	5.24778	5.64518	0.3148
ENSMUSG00000021700	Rab3c	RAB3C, member RAS oncogene family	0.1986	8.42422	8.62284	0.315
ENSMUSG00000060519	Tor3a	torsin family 3, member A	-0.443	4.09631	3.65329	0.3154
ENSMUSG00000071042	Rasgrp3	RAS, guanyl releasing protein 3	-0.3884	4.51527	4.12691	0.3175
ENSMUSG00000027253	Lrp4	low density lipoprotein receptor-related protein 4	-0.2553	5.81885	5.56354	0.3175
ENSMUSG00000037771	Slc32a1	solute carrier family 32 (GABA vesicular transport...	0.2093	6.35994	6.56924	0.3203
ENSMUSG00000020868	Xylt2	xylosyltransferase II	0.2952	4.99701	5.29222	0.3211
ENSMUSG00000015843	Rxrg	retinoid X receptor gamma	0.3947	2.64957	3.04424	0.3212
ENSMUSG00000054364	Rhob	ras homolog family member B	-0.1189	8.45619	8.33729	0.3212
ENSMUSG00000076435	Acsf2	acyl-CoA synthetase family member 2	-0.3428	4.92746	4.58463	0.3217
ENSMUSG00000041380	Htr2c	5-hydroxytryptamine (serotonin) receptor 2C	0.5461	4.70295	5.24901	0.3232
ENSMUSG00000031343	Gabra3	gamma-aminobutyric acid type A receptor subunit al...	0.2714	5.89689	6.16832	0.3239
ENSMUSG00000028459	Cd72	CD72 antigen	-0.795	1.99511	1.20014	0.324
ENSMUSG00000031387	Renbp	renin binding protein	-0.6136	3.26716	2.65361	0.324
ENSMUSG00000030339	Ltbr	lymphotoxin B receptor	-0.4643	4.12012	3.65582	0.324
ENSMUSG00000035713	Usp35	ubiquitin specific peptidase 35	-0.2891	5.36911	5.08002	0.324
ENSMUSG00000054013	Tmem179	transmembrane protein 179	0.1767	6.92063	7.09729	0.324
ENSMUSG00000017639	Rab11fip4	RAB11 family interacting protein 4 (class II)	0.1139	8.22698	8.34083	0.324
ENSMUSG00000022468	Endou	endonuclease, polyU-specific	-0.6695	2.73092	2.06141	0.3253
ENSMUSG00000041695	Kcnj2	potassium inwardly-rectifying channel, subfamily J...	-0.4849	4.10285	3.61792	0.3253
ENSMUSG00000029608	Rph3a	rabphilin 3A	0.1665	8.77719	8.9437	0.3253
ENSMUSG00000028059	Arhgef2	Rho/Rac guanine nucleotide exchange factor 2	-0.1446	7.59704	7.45243	0.3253
ENSMUSG00000038507	Parp12	poly (ADP-ribose) polymerase family, member 12	-0.3877	4.44443	4.0567	0.3265
ENSMUSG00000002771	Grin2d	glutamate receptor, ionotropic, NMDA2D (epsilon 4)	0.3103	4.55402	4.86433	0.3265
ENSMUSG00000026384	Ptpn4	protein tyrosine phosphatase, non-receptor type 4	0.238	5.37213	5.61012	0.3273
ENSMUSG00000037031	Tspan15	tetraspanin 15	-0.3417	4.9796	4.63795	0.3276
ENSMUSG00000027210	Meis2	Meis homeobox 2	0.3352	5.74244	6.07768	0.3279
ENSMUSG00000027673	Ndufb5	NADH:ubiquinone oxidoreductase subunit B5	0.1872	6.50136	6.68853	0.3279
ENSMUSG00000053414	Hunk	hormonally upregulated Neu-associated kinase	-0.3146	5.55484	5.24024	0.3291
ENSMUSG00000071713	Csf2rb	colony stimulating factor 2 receptor, beta, low-af...	-0.7592	2.62362	1.86439	0.3296
ENSMUSG00000020467	Efemp1	epidermal growth factor-containing fibulin-like ex...	-0.4185	4.11594	3.69742	0.3297
ENSMUSG00000001507	Itga3	integrin alpha 3	0.3386	4.46002	4.7986	0.3297
ENSMUSG00000023274	Cd4	CD4 antigen	0.8195	0.6159	1.43543	0.3301
ENSMUSG00000022906	Parp9	poly (ADP-ribose) polymerase family, member 9	-0.5602	3.29851	2.73836	0.3301
ENSMUSG00000006517	Mvd	mevalonate (diphospho) decarboxylase	0.4168	3.93359	4.35041	0.3301
ENSMUSG00000037010	Apln	apelin	0.3861	4.03422	4.42027	0.3301
ENSMUSG00000026600	Soat1	sterol O-acyltransferase 1	-0.2608	5.61543	5.35464	0.3301
ENSMUSG00000028249	Sdcbp	syndecan binding protein	-0.156	7.67916	7.52312	0.3301
ENSMUSG00000020496	Rnf187	ring finger protein 187	0.1126	8.48741	8.60003	0.3301
ENSMUSG00000032011	Thy1	thymus cell antigen 1, theta	0.09857	9.68939	9.78796	0.3301
ENSMUSG00000050288	Fzd2	frizzled class receptor 2	0.5489	2.94482	3.49376	0.3302
ENSMUSG00000089682	Bcl2l2	BCL2-like 2	0.1556	7.09384	7.24941	0.3302
ENSMUSG00000035835	Plppr3	phospholipid phosphatase related 3	0.2811	5.70613	5.98724	0.3318
ENSMUSG00000027506	Tpd52	tumor protein D52	-0.234	5.95959	5.72559	0.3326
ENSMUSG00000031775	Pllp	plasma membrane proteolipid	-0.2555	6.48756	6.23203	0.3332
ENSMUSG00000053192	Mllt11	myeloid/lymphoid or mixed-lineage leukemia; transl...	0.1141	8.16084	8.27494	0.334
ENSMUSG00000040725	Hnrnpul1	heterogeneous nuclear ribonucleoprotein U-like 1	-0.1462	7.3154	7.16921	0.3348
ENSMUSG00000018865	Sult4a1	sulfotransferase family 4A, member 1	0.111	8.82134	8.93238	0.3353
ENSMUSG00000040794	C1qtnf4	C1q and tumor necrosis factor related protein 4	0.2241	6.33652	6.56057	0.3355
ENSMUSG00000047766	Lrrc49	leucine rich repeat containing 49	0.1979	6.12066	6.31856	0.3355
ENSMUSG00000028957	Per3	period circadian clock 3	0.2351	5.86231	6.09743	0.3359
ENSMUSG00000036306	Lzts1	leucine zipper, putative tumor suppressor 1	0.2214	5.85826	6.07971	0.3368
ENSMUSG00000002325	Irf9	interferon regulatory factor 9	-0.3364	4.82141	4.48499	0.3371
ENSMUSG00000026626	Ppp2r5a	protein phosphatase 2, regulatory subunit B', alph...	-0.1893	6.53474	6.34546	0.3377
ENSMUSG00000023186	Vwa5a	von Willebrand factor A domain containing 5A	-0.4109	4.43601	4.02511	0.3381
ENSMUSG00000040061	Plcb2	phospholipase C, beta 2	-0.589	3.16717	2.57817	0.3417
ENSMUSG00000054520	Sh3bp2	SH3-domain binding protein 2	-0.5699	3.51323	2.94333	0.3417
ENSMUSG00000009741	Ubp1	upstream binding protein 1	-0.1491	7.222	7.07285	0.3429
ENSMUSG00000042216	Sgsm1	small G protein signaling modulator 1	0.1859	6.54786	6.73381	0.343
ENSMUSG00000003411	Rab3b	RAB3B, member RAS oncogene family	-0.2855	6.03578	5.75028	0.3434
ENSMUSG00000030516	Tjp1	tight junction protein 1	-0.1834	6.61859	6.43522	0.3434
ENSMUSG00000030107	Usp18	ubiquitin specific peptidase 18	-0.6459	2.30113	1.65524	0.3438
ENSMUSG00000031639	Tlr3	toll-like receptor 3	-0.4576	4.09847	3.64082	0.3438
ENSMUSG00000048899	Rimkla	ribosomal modification protein rimK-like family me...	0.3562	4.08757	4.44376	0.3438
ENSMUSG00000026839	Upp2	uridine phosphorylase 2	0.3761	4.2737	4.6498	0.3442
ENSMUSG00000049625	Tifab	TRAF-interacting protein with forkhead-associated ...	-0.6483	3.19986	2.55156	0.3449
ENSMUSG00000050761	Gp1bb	glycoprotein Ib, beta polypeptide	0.1665	7.73941	7.9059	0.3449
ENSMUSG00000026222	Sp100	nuclear antigen Sp100	-0.6311	3.18555	2.5544	0.3453
ENSMUSG00000040612	Ildr2	immunoglobulin-like domain containing receptor 2	0.159	7.09265	7.25164	0.3453
ENSMUSG00000032570	Atp2c1	ATPase, Ca++-sequestering	-0.1573	7.35623	7.19891	0.3454
ENSMUSG00000056665	Them6	thioesterase superfamily member 6	0.2501	5.49261	5.74268	0.3486
ENSMUSG00000015085	Entpd2	ectonucleoside triphosphate diphosphohydrolase 2	-0.3632	4.46642	4.10326	0.3488
ENSMUSG00000022971	Ifnar2	interferon (alpha and beta) receptor 2	-0.3346	4.75325	4.41868	0.3493
ENSMUSG00000020444	Guk1	guanylate kinase 1	0.1985	6.22582	6.42435	0.35
ENSMUSG00000031517	Gpm6a	glycoprotein m6a	-0.1453	9.78768	9.6424	0.35
ENSMUSG00000020014	Cfap54	cilia and flagella associated protein 54	0.4625	3.0886	3.5511	0.3509
ENSMUSG00000027692	Tnik	TRAF2 and NCK interacting kinase	-0.1394	7.789	7.64959	0.3509
ENSMUSG00000044628	Rnf208	ring finger protein 208	0.1573	7.12624	7.28352	0.3518
ENSMUSG00000028194	Ddah1	dimethylarginine dimethylaminohydrolase 1	-0.1753	6.9918	6.8165	0.3528
ENSMUSG00000032064	Dixdc1	DIX domain containing 1	0.1865	6.40349	6.58998	0.3529
ENSMUSG00000027581	Stmn3	stathmin-like 3	0.1643	8.72224	8.88651	0.3529
ENSMUSG00000021670	Hmgcr	3-hydroxy-3-methylglutaryl-Coenzyme A reductase	0.202	6.2093	6.41133	0.3545
ENSMUSG00000090291	Lrrc10b	leucine rich repeat containing 10B	0.3648	5.39655	5.76133	0.356
ENSMUSG00000035277	Arx	aristaless related homeobox	-0.4328	4.38511	3.95228	0.3576
ENSMUSG00000030282	Cmas	cytidine monophospho-N-acetylneuraminic acid synth...	0.1939	6.22053	6.41442	0.3576
ENSMUSG00000024835	Coro1b	coronin, actin binding protein 1B	-0.1831	6.65236	6.46926	0.3576
ENSMUSG00000036995	Asap3	ArfGAP with SH3 domain, ankyrin repeat and PH doma...	-0.5104	3.71902	3.20865	0.3585
ENSMUSG00000034663	Bmp2k	BMP2 inducible kinase	-0.3693	4.6021	4.23276	0.3591
ENSMUSG00000020399	Havcr2	hepatitis A virus cellular receptor 2	-0.5632	3.34371	2.78048	0.3623
ENSMUSG00000000305	Cdh4	cadherin 4	0.4059	3.66622	4.07213	0.3623
ENSMUSG00000026872	Zeb2	zinc finger E-box binding homeobox 2	-0.2174	7.59705	7.37962	0.3623
ENSMUSG00000083282	Ctsf	cathepsin F	0.212	5.98889	6.20087	0.3653
ENSMUSG00000026548	Slamf9	SLAM family member 9	-0.7993	2.39038	1.59108	0.3663
ENSMUSG00000031708	Tecr	trans-2,3-enoyl-CoA reductase	0.1636	8.55361	8.71719	0.3663
ENSMUSG00000073755	5730409E04Rik	RIKEN cDNA 5730409E04Rik gene	0.1717	6.73282	6.90455	0.3667
ENSMUSG00000048834	Vstm2a	V-set and transmembrane domain containing 2A	-0.2214	6.3864	6.16501	0.3673
ENSMUSG00000031950	Gabarapl2	GABA type A receptor associated protein like 2	0.1889	6.27995	6.46884	0.3682
ENSMUSG00000040549	Ckap5	cytoskeleton associated protein 5	-0.1367	7.4168	7.28009	0.3688
ENSMUSG00000020121	Srgap1	SLIT-ROBO Rho GTPase activating protein 1	0.2445	4.8972	5.14172	0.3698
ENSMUSG00000043008	Klhl6	kelch-like 6	-0.7108	2.60013	1.88936	0.3702
ENSMUSG00000022491	Glycam1	glycosylation dependent cell adhesion molecule 1	-0.9389	1.9654	1.02654	0.3711
ENSMUSG00000032199	Polr2m	polymerase (RNA) II (DNA directed) polypeptide M	0.1431	7.30851	7.45166	0.3711
ENSMUSG00000025477	Inpp5a	inositol polyphosphate-5-phosphatase A	0.2303	5.53279	5.76306	0.3723
ENSMUSG00000037172	Dennd11	DENN domain containing 11	0.2044	6.12589	6.33031	0.3729
ENSMUSG00000023944	Hsp90ab1	heat shock protein 90 alpha (cytosolic), class B m...	-0.05425	10.8456	10.7913	0.3742
ENSMUSG00000079362	Gm43302	predicted gene 43302	-0.6467	2.54617	1.89947	0.3752
ENSMUSG00000048385	Scrt1	scratch family zinc finger 1	0.1791	7.01828	7.19734	0.3752
ENSMUSG00000054162	Spock3	sparc/osteonectin, cwcv and kazal-like domains pro...	0.2215	6.0035	6.22504	0.3756
ENSMUSG00000050856	Atp5me	ATP synthase membrane subunit e	0.1906	6.42883	6.61938	0.3756
ENSMUSG00000027500	Stmn2	stathmin-like 2	0.1116	8.30416	8.41576	0.3756
ENSMUSG00000022893	Adamts1	ADAM metallopeptidase with thrombospondin type 1 m...	-0.3954	4.70772	4.3123	0.3761
ENSMUSG00000041362	Shtn1	shootin 1	0.2237	5.94125	6.1649	0.3764
ENSMUSG00000020366	Mapk9	mitogen-activated protein kinase 9	0.1308	7.47569	7.60645	0.3768
ENSMUSG00000032060	Cryab	crystallin, alpha B	-0.3202	7.49383	7.17368	0.3778
ENSMUSG00000038467	Chmp4b	charged multivesicular body protein 4B	0.1439	7.42946	7.57335	0.3778
ENSMUSG00000023008	Fmnl3	formin-like 3	-0.3905	4.48185	4.09134	0.3795
ENSMUSG00000072620	Slfn2	schlafen 2	-0.6111	2.37068	1.75954	0.38
ENSMUSG00000050640	Tmem150c	transmembrane protein 150C	0.1936	6.34874	6.54236	0.3802
ENSMUSG00000054545	Ugt1a6a	UDP glucuronosyltransferase 1 family, polypeptide ...	-0.6023	3.19124	2.5889	0.3806
ENSMUSG00000028434	Epb41l4b	erythrocyte membrane protein band 4.1 like 4b	0.2587	5.3278	5.58647	0.383
ENSMUSG00000020009	Ifngr1	interferon gamma receptor 1	-0.3556	4.70511	4.34951	0.3836
ENSMUSG00000032246	Calml4	calmodulin-like 4	0.7656	1.77218	2.53778	0.3843
ENSMUSG00000089675	Ugt1a8	UDP glucuronosyltransferase 1 family, polypeptide ...	-0.5807	2.91746	2.33677	0.3843
ENSMUSG00000090165	Ugt1a10	UDP glycosyltransferase 1 family, polypeptide A10	-0.5806	2.91617	2.3356	0.3843
ENSMUSG00000090175	Ugt1a9	UDP glucuronosyltransferase 1 family, polypeptide ...	-0.5806	2.91617	2.3356	0.3843
ENSMUSG00000090171	Ugt1a2	UDP glucuronosyltransferase 1 family, polypeptide ...	-0.5804	2.91829	2.33792	0.3843
ENSMUSG00000089943	Ugt1a5	UDP glucuronosyltransferase 1 family, polypeptide ...	-0.5799	2.92182	2.34193	0.3843
ENSMUSG00000007817	Zmiz1	zinc finger, MIZ-type containing 1	-0.1506	7.25883	7.1082	0.3843
ENSMUSG00000026773	Pfkfb3	6-phosphofructo-2-kinase/fructose-2,6-biphosphatas...	-0.2602	5.51125	5.25106	0.389
ENSMUSG00000031075	Ano1	anoctamin 1, calcium activated chloride channel	0.5602	2.21804	2.77827	0.3898
ENSMUSG00000052861	Dnah6	dynein, axonemal, heavy chain 6	0.6768	2.30607	2.98286	0.3927
ENSMUSG00000021303	Gng4	guanine nucleotide binding protein (G protein), ga...	0.2753	5.15686	5.43213	0.3927
ENSMUSG00000025006	Sorbs1	sorbin and SH3 domain containing 1	-0.2084	6.09755	5.88915	0.3927
ENSMUSG00000003273	Car11	carbonic anhydrase 11	0.1617	7.31046	7.47218	0.3927
ENSMUSG00000004849	Ap1s1	adaptor protein complex AP-1, sigma 1	0.1381	7.50629	7.64435	0.3927
ENSMUSG00000001751	Naglu	alpha-N-acetylglucosaminidase (Sanfilippo disease ...	-0.4296	4.13588	3.70633	0.3935
ENSMUSG00000022494	Shisa9	shisa family member 9	0.2307	5.8486	6.07934	0.3935
ENSMUSG00000029110	Rnf4	ring finger protein 4	0.2117	6.1085	6.32017	0.3935
ENSMUSG00000042751	Nmnat2	nicotinamide nucleotide adenylyltransferase 2	0.1339	7.46649	7.6004	0.3935
ENSMUSG00000048865	Arhgap30	Rho GTPase activating protein 30	-0.5796	3.29933	2.71971	0.3939
ENSMUSG00000039943	Plcb4	phospholipase C, beta 4	0.3291	4.94502	5.27417	0.3968
ENSMUSG00000025468	Caly	calcyon neuron-specific vesicular protein	0.1387	7.56572	7.70439	0.3973
ENSMUSG00000037266	Rsrp1	arginine/serine rich protein 1	-0.1535	8.8787	8.72519	0.3976
ENSMUSG00000004730	Adgre1	adhesion G protein-coupled receptor E1	-0.5174	3.313	2.79556	0.3984
ENSMUSG00000032812	Arap1	ArfGAP with RhoGAP domain, ankyrin repeat and PH d...	-0.3075	5.02755	4.72006	0.3992
ENSMUSG00000001995	Sipa1l2	signal-induced proliferation-associated 1 like 2	0.2111	6.13402	6.34509	0.3992
ENSMUSG00000025982	Sf3b1	splicing factor 3b, subunit 1	-0.1078	8.44434	8.33657	0.3992
ENSMUSG00000046329	Slc25a23	solute carrier family 25 (mitochondrial carrier; p...	0.0926	9.2061	9.2987	0.3992
ENSMUSG00000026131	Dst	dystonin	-0.1616	8.95288	8.79128	0.4005
ENSMUSG00000037003	Tns2	tensin 2	-0.2945	5.23643	4.94188	0.4034
ENSMUSG00000053158	Fes	feline sarcoma oncogene	-0.5738	3.42078	2.84703	0.4038
ENSMUSG00000048218	Amigo2	adhesion molecule with Ig like domain 2	0.3205	4.81841	5.13893	0.4038
ENSMUSG00000035299	Mid1	midline 1	-0.5116	3.24495	2.73336	0.4046
ENSMUSG00000057193	Slc44a2	solute carrier family 44, member 2	-0.2146	6.06135	5.84675	0.4047
ENSMUSG00000022995	Enah	ENAH actin regulator	0.1323	7.55815	7.69048	0.4047
ENSMUSG00000022969	Il10rb	interleukin 10 receptor, beta	-0.4388	3.98351	3.54467	0.4051
ENSMUSG00000041329	Atp1b2	ATPase, Na+/K+ transporting, beta 2 polypeptide	-0.2314	9.89863	9.66726	0.4064
ENSMUSG00000016496	Cd274	CD274 antigen	-0.5947	2.75954	2.16488	0.407
ENSMUSG00000028339	Col15a1	collagen, type XV, alpha 1	0.4917	3.13011	3.62181	0.408
ENSMUSG00000003812	Dnase2a	deoxyribonuclease II alpha	-0.4846	3.44706	2.96246	0.408
ENSMUSG00000000058	Cav2	caveolin 2	-0.3619	4.56688	4.20499	0.408
ENSMUSG00000026456	Cyb5r1	cytochrome b5 reductase 1	-0.2904	5.15372	4.86335	0.408
ENSMUSG00000003039	Fam32a	family with sequence similarity 32, member A	0.2063	6.41371	6.61997	0.408
ENSMUSG00000032625	Thsd7a	thrombospondin, type I, domain containing 7A	0.2725	5.02549	5.29798	0.4084
ENSMUSG00000022211	Carmil3	capping protein regulator and myosin 1 linker 3	0.2168	6.37988	6.59671	0.4084
ENSMUSG00000029426	Scarb2	scavenger receptor class B, member 2	-0.2117	5.95904	5.74731	0.4084
ENSMUSG00000031749	St3gal2	ST3 beta-galactoside alpha-2,3-sialyltransferase 2	0.1658	6.75408	6.91985	0.4084
ENSMUSG00000052684	Jun	jun proto-oncogene	-0.294	6.84091	6.54692	0.4089
ENSMUSG00000024063	Lbh	limb-bud and heart	-0.2237	6.19218	5.96843	0.4113
ENSMUSG00000041323	Ak7	adenylate kinase 7	0.6527	2.07098	2.72365	0.4115
ENSMUSG00000020432	Tcn2	transcobalamin 2	-0.3101	5.24354	4.93343	0.4128
ENSMUSG00000015291	Gdi1	GDP dissociation inhibitor 1	0.08767	9.3262	9.41386	0.4128
ENSMUSG00000018822	Sfrp5	secreted frizzled-related sequence protein 5	0.402	1.91695	2.319	0.414
ENSMUSG00000099974	Bcl2a1d	B cell leukemia/lymphoma 2 related protein A1d	-0.189	0.62771	0.43872	0.414
ENSMUSG00000004552	Ctse	cathepsin E	-0.1884	0.64376	0.45534	0.414
ENSMUSG00000062310	Glrp1	glutamine repeat protein 1	-0.1439	0.64653	0.50263	0.414
ENSMUSG00000026358	Rgs1	regulator of G-protein signaling 1	-0.1409	0.62549	0.48457	0.414
ENSMUSG00000038204	Asb10	ankyrin repeat and SOCS box-containing 10	-0.134	0.63029	0.49631	0.414
ENSMUSG00000068227	Il2rb	interleukin 2 receptor, beta chain	-0.08166	0.63141	0.54975	0.414
ENSMUSG00000009739	Pou6f1	POU domain, class 6, transcription factor 1	-0.1453	7.25187	7.10656	0.4142
ENSMUSG00000019122	Ccl9	C-C motif chemokine ligand 9	-0.6698	2.55834	1.88851	0.4145
ENSMUSG00000033105	Lss	lanosterol synthase	0.272	5.21009	5.48212	0.4145
ENSMUSG00000016382	Pls3	plastin 3 (T-isoform)	-0.1713	7.77871	7.60737	0.4145
ENSMUSG00000059316	Slc27a4	solute carrier family 27 (fatty acid transporter),...	0.166	6.61379	6.7798	0.4145
ENSMUSG00000035885	Cox8a	cytochrome c oxidase subunit 8A	0.1542	8.21285	8.36701	0.4145
ENSMUSG00000033174	Mgll	monoglyceride lipase	-0.1439	7.85523	7.7113	0.4145
ENSMUSG00000026509	Capn2	calpain 2	-0.1792	6.74141	6.5622	0.4214
ENSMUSG00000038264	Sema7a	sema domain, immunoglobulin domain (Ig), and GPI m...	-0.156	7.0191	6.86312	0.4214
ENSMUSG00000044827	Tlr1	toll-like receptor 1	-0.7318	1.96973	1.23789	0.4229
ENSMUSG00000000088	Cox5a	cytochrome c oxidase subunit 5A	0.1799	6.68257	6.86251	0.4229
ENSMUSG00000045608	Dbx2	developing brain homeobox 2	-0.3352	4.80798	4.47279	0.4232
ENSMUSG00000029168	Dpysl5	dihydropyrimidinase-like 5	0.2495	5.15875	5.40829	0.4248
ENSMUSG00000084883	Ccdc85c	coiled-coil domain containing 85C	0.4329	3.61722	4.05016	0.4261
ENSMUSG00000026628	Atf3	activating transcription factor 3	-0.7822	2.41075	1.62856	0.4273
ENSMUSG00000059995	Atxn7l3	ataxin 7-like 3	0.12	7.73656	7.85656	0.4273
ENSMUSG00000042129	Rassf4	Ras association (RalGDS/AF-6) domain family member...	-0.5012	3.85896	3.35778	0.4284
ENSMUSG00000041035	Dpcd	deleted in primary ciliary dyskinesia	0.247	5.4111	5.65807	0.4284
ENSMUSG00000000753	Serpinf1	serine (or cysteine) peptidase inhibitor, clade F,...	-0.3632	4.40021	4.03705	0.4286
ENSMUSG00000025558	Dock9	dedicator of cytokinesis 9	-0.1698	8.06187	7.89208	0.4287
ENSMUSG00000026179	Pnkd	paroxysmal nonkinesiogenic dyskinesia	0.1256	7.73277	7.85835	0.4288
ENSMUSG00000019232	Etnppl	ethanolamine phosphate phospholyase	0.3538	4.50644	4.86023	0.4291
ENSMUSG00000038235	F11r	F11 receptor	-0.3988	4.09966	3.70089	0.4298
ENSMUSG00000034936	Arl4d	ADP-ribosylation factor-like 4D	0.3647	3.94076	4.30546	0.4302
ENSMUSG00000037921	Ddx60	DExD/H box helicase 60	-0.6579	2.36163	1.70372	0.4305
ENSMUSG00000052837	Junb	jun B proto-oncogene	-0.3217	6.2665	5.94478	0.4305
ENSMUSG00000024122	Pdpk1	3-phosphoinositide dependent protein kinase 1	0.1794	6.59687	6.77628	0.4305
ENSMUSG00000036745	Ttll7	tubulin tyrosine ligase-like family, member 7	0.1499	7.47274	7.62269	0.4305
ENSMUSG00000004980	Hnrnpa2b1	heterogeneous nuclear ribonucleoprotein A2/B1	-0.1169	9.15861	9.04171	0.4305
ENSMUSG00000020709	Adap2	ArfGAP with dual PH domains 2	-0.5318	3.34731	2.81551	0.4331
ENSMUSG00000020077	Srgn	serglycin	-0.5211	3.37486	2.85371	0.4331
ENSMUSG00000063415	Cyp26b1	cytochrome P450, family 26, subfamily b, polypepti...	-0.4663	3.91746	3.4512	0.4331
ENSMUSG00000018427	Ypel2	yippee like 2	0.2542	5.25484	5.509	0.4331
ENSMUSG00000021701	Plk2	polo like kinase 2	-0.2298	7.85746	7.62762	0.4331
ENSMUSG00000028760	Eif4g3	eukaryotic translation initiation factor 4 gamma, ...	-0.09684	8.34332	8.24647	0.4331
ENSMUSG00000079481	Nhsl2	NHS like 2	0.2192	5.93817	6.15736	0.4358
ENSMUSG00000025137	Pcyt2	phosphate cytidylyltransferase 2, ethanolamine	0.1688	6.59374	6.7625	0.4358
ENSMUSG00000026959	Grin1	glutamate receptor, ionotropic, NMDA1 (zeta 1)	0.08771	9.19575	9.28347	0.4358
ENSMUSG00000029720	Gm20605	predicted gene 20605	-0.2132	6.16125	5.94807	0.436
ENSMUSG00000021680	Crhbp	corticotropin releasing hormone binding protein	-0.4507	4.60532	4.15463	0.4367
ENSMUSG00000059325	Hopx	HOP homeobox	-0.2864	6.36967	6.08327	0.4383
ENSMUSG00000031543	Ank1	ankyrin 1, erythroid	0.2047	5.92607	6.13073	0.4383
ENSMUSG00000054793	Cadm4	cell adhesion molecule 4	-0.1816	7.94913	7.76755	0.4383
ENSMUSG00000047045	Tmem164	transmembrane protein 164	0.3536	4.2084	4.56201	0.4385
ENSMUSG00000019302	Atp6v0a1	ATPase, H+ transporting, lysosomal V0 subunit A1	0.07467	9.22785	9.30252	0.4385
ENSMUSG00000023064	Sncg	synuclein, gamma	0.4807	2.6473	3.12803	0.4386
ENSMUSG00000020100	Slc29a3	solute carrier family 29 (nucleoside transporters)...	-0.348	4.51152	4.16356	0.4386
ENSMUSG00000054428	Atp5if1	ATP synthase inhibitory factor subunit 1	0.1648	6.97044	7.13522	0.4386
ENSMUSG00000073424	Cyp4f15	cytochrome P450, family 4, subfamily f, polypeptid...	0.383	3.99272	4.37576	0.4399
ENSMUSG00000061048	Cdh3	cadherin 3	0.2353	0.58506	0.82035	0.4399
ENSMUSG00000019428	Fkbp8	FK506 binding protein 8	0.09731	8.54388	8.64118	0.4399
ENSMUSG00000013646	Sh3bp5l	SH3 binding domain protein 5 like	0.2421	5.36022	5.60233	0.4401
ENSMUSG00000025318	Jph3	junctophilin 3	0.1641	8.11641	8.28046	0.4402
ENSMUSG00000051048	P4ha3	procollagen-proline, 2-oxoglutarate 4-dioxygenase ...	-0.545	3.34811	2.80314	0.4443
ENSMUSG00000029798	Herc6	hect domain and RLD 6	-0.4789	3.47855	2.99962	0.4443
ENSMUSG00000030447	Cyfip1	cytoplasmic FMR1 interacting protein 1	-0.1747	6.92855	6.75385	0.4443
ENSMUSG00000041459	Tardbp	TAR DNA binding protein	-0.1175	7.6394	7.52186	0.4443
ENSMUSG00000028655	Mfsd2a	MFSD2 lysolipid transporter A, lysophospholipid	0.3439	4.19319	4.53708	0.4453
ENSMUSG00000045246	Kcng4	potassium voltage-gated channel, subfamily G, memb...	0.3849	3.37214	3.75704	0.4474
ENSMUSG00000032637	Atxn2l	ataxin 2-like	-0.1115	8.0115	7.89996	0.4493
ENSMUSG00000028919	Arhgef19	Rho guanine nucleotide exchange factor 19	-0.2989	4.90561	4.60672	0.4496
ENSMUSG00000027015	Cybrd1	cytochrome b reductase 1	-0.6136	3.07898	2.46534	0.4503
ENSMUSG00000032135	Mcam	melanoma cell adhesion molecule	-0.3014	4.99126	4.68981	0.4512
ENSMUSG00000052026	Slc6a7	solute carrier family 6 (neurotransmitter transpor...	0.1835	6.44393	6.62742	0.4512
ENSMUSG00000001175	Calm1	calmodulin 1	0.1027	11.1567	11.2594	0.452
ENSMUSG00000020042	Abtb3	ankyrin repeat and BTB domain containing 3	0.2766	4.4163	4.69294	0.4535
ENSMUSG00000019437	Tlcd1	TLC domain containing 1	0.3407	4.20348	4.54414	0.4549
ENSMUSG00000042699	Dhx9	DExH-box helicase 9	-0.1634	6.81026	6.64683	0.4549
ENSMUSG00000017491	Rarb	retinoic acid receptor, beta	0.4192	2.59123	3.01039	0.455
ENSMUSG00000027423	Snx5	sorting nexin 5	-0.1803	6.55539	6.37505	0.455
ENSMUSG00000071415	Rpl23	ribosomal protein L23	-0.1681	7.73465	7.56658	0.4554
ENSMUSG00000027254	Map1a	microtubule-associated protein 1 A	0.1002	10.4036	10.5038	0.4562
ENSMUSG00000002393	Nr2f6	nuclear receptor subfamily 2, group F, member 6	0.3306	4.40055	4.73117	0.4563
ENSMUSG00000021453	Gadd45g	growth arrest and DNA-damage-inducible 45 gamma	-0.3412	4.68646	4.34531	0.4564
ENSMUSG00000029334	Prkg2	protein kinase, cGMP-dependent, type II	0.5187	2.31038	2.82905	0.4569
ENSMUSG00000029004	Kmt2e	lysine (K)-specific methyltransferase 2E	-0.1451	7.18387	7.0388	0.46
ENSMUSG00000035770	Dync1li2	dynein, cytoplasmic 1 light intermediate chain 2	0.124	7.91682	8.04078	0.46
ENSMUSG00000005103	Wdr1	WD repeat domain 1	-0.122	7.79555	7.67354	0.46
ENSMUSG00000003072	Atp5f1d	ATP synthase F1 subunit delta	0.1415	7.64305	7.78456	0.4617
ENSMUSG00000031144	Syp	synaptophysin	0.08192	10.6325	10.7144	0.4636
ENSMUSG00000022472	Desi1	desumoylating isopeptidase 1	0.1599	7.21602	7.37593	0.464
ENSMUSG00000038576	Susd4	sushi domain containing 4	0.1337	7.35836	7.49206	0.464
ENSMUSG00000032601	Prkar2a	protein kinase, cAMP dependent regulatory, type II...	0.2177	5.68093	5.89859	0.4645
ENSMUSG00000048277	Syngr2	synaptogyrin 2	-0.3887	4.22955	3.84088	0.4667
ENSMUSG00000028278	Rragd	Ras-related GTP binding D	0.1844	6.41788	6.6023	0.4667
ENSMUSG00000026074	Map4k4	mitogen-activated protein kinase kinase kinase kin...	-0.1299	7.40864	7.27874	0.4698
ENSMUSG00000038255	Neurod2	neurogenic differentiation 2	-0.5558	7.32592	6.77012	0.4705
ENSMUSG00000020038	Cry1	cryptochrome circadian regulator 1	0.3653	3.8355	4.20076	0.4705
ENSMUSG00000038552	Fndc4	fibronectin type III domain containing 4	0.1668	6.60438	6.77121	0.4705
ENSMUSG00000048537	Phldb1	pleckstrin homology like domain, family B, member ...	-0.1914	7.87517	7.68377	0.4709
ENSMUSG00000026667	Uhmk1	U2AF homology motif (UHM) kinase 1	0.1327	7.86729	7.99995	0.4709
ENSMUSG00000030043	Tacr1	tachykinin receptor 1	0.6271	1.58784	2.21489	0.471
ENSMUSG00000026608	Kctd3	potassium channel tetramerisation domain containin...	0.1673	6.49085	6.65816	0.471
ENSMUSG00000079017	Ifi27l2a	interferon, alpha-inducible protein 27 like 2A	-0.6215	2.00776	1.38627	0.4727
ENSMUSG00000090145	Ugt1a6b	UDP glucuronosyltransferase 1 family, polypeptide ...	-0.5804	2.93698	2.35662	0.4761
ENSMUSG00000089960	Ugt1a1	UDP glucuronosyltransferase 1 family, polypeptide ...	-0.5775	2.9227	2.34519	0.4761
ENSMUSG00000028649	Macf1	microtubule-actin crosslinking factor 1	-0.1492	8.87643	8.7272	0.4761
ENSMUSG00000023960	Enpp5	ectonucleotide pyrophosphatase/phosphodiesterase 5	0.1116	7.83261	7.94425	0.4761
ENSMUSG00000009079	Ewsr1	Ewing sarcoma breakpoint region 1	-0.09689	8.39233	8.29543	0.4761
ENSMUSG00000021775	Nr1d2	nuclear receptor subfamily 1, group D, member 2	0.1923	6.38671	6.57901	0.4766
ENSMUSG00000024663	Rab3il1	RAB3A interacting protein (rabin3)-like 1	-0.361	4.30304	3.94209	0.4772
ENSMUSG00000021133	Susd6	sushi domain containing 6	-0.2216	6.43514	6.21357	0.4786
ENSMUSG00000026640	Plxna2	plexin A2	-0.1863	6.90131	6.71497	0.4788
ENSMUSG00000006412	Pfdn2	prefoldin 2	0.165	6.6239	6.78888	0.4791
ENSMUSG00000001415	Smg5	SMG5 nonsense mediated mRNA decay factor	0.1581	6.63378	6.79184	0.4791
ENSMUSG00000026311	Asb1	ankyrin repeat and SOCS box-containing 1	0.2381	5.39187	5.62997	0.4804
ENSMUSG00000037815	Ctnna1	catenin alpha 1	-0.1818	6.5446	6.36283	0.4807
ENSMUSG00000035033	Tbr1	T-box brain transcription factor 1	-0.4861	5.55465	5.06857	0.4809
ENSMUSG00000089929	Bcl2a1b	B cell leukemia/lymphoma 2 related protein A1b	-0.6894	1.92508	1.23569	0.4832
ENSMUSG00000001473	Tubb6	tubulin, beta 6 class V	-0.5672	1.85856	1.29137	0.4832
ENSMUSG00000062209	Erbb4	erb-b2 receptor tyrosine kinase 4	-0.26	5.43186	5.1719	0.4832
ENSMUSG00000039546	Ajap1	adherens junction associated protein 1	0.2508	5.29306	5.54387	0.4832
ENSMUSG00000030738	Eif3c	eukaryotic translation initiation factor 3, subuni...	-0.1127	7.75192	7.63922	0.4832
ENSMUSG00000070873	Lilra5	leukocyte immunoglobulin-like receptor, subfamily ...	-0.08241	0.64197	0.55956	0.4832
ENSMUSG00000031875	Cmtm3	CKLF-like MARVEL transmembrane domain containing 3	-0.3969	4.06473	3.66787	0.4836
ENSMUSG00000023078	Cxcl13	C-X-C motif chemokine ligand 13	-0.3733	0.94129	0.56802	0.4836
ENSMUSG00000040740	Slc25a34	solute carrier family 25, member 34	0.551	2.58343	3.13447	0.4838
ENSMUSG00000003469	Phyhip	phytanoyl-CoA hydroxylase interacting protein	0.1724	9.13905	9.31149	0.4842
ENSMUSG00000025393	Atp5f1b	ATP synthase F1 subunit beta	0.1009	10.0553	10.1561	0.4842
ENSMUSG00000011171	Vipr2	vasoactive intestinal peptide receptor 2	0.4307	1.28795	1.71868	0.4883
ENSMUSG00000020671	Rab10	RAB10, member RAS oncogene family	-0.1331	7.26507	7.13196	0.4883
ENSMUSG00000038949	Cnst	consortin, connexin sorting protein	0.2259	5.43177	5.6577	0.4884
ENSMUSG00000019823	Mical1	microtubule associated monooxygenase, calponin and...	-0.3721	4.3904	4.01825	0.4897
ENSMUSG00000040296	Rigi	RNA sensor RIG-I	-0.4573	3.65327	3.19593	0.4904
ENSMUSG00000036880	Acaa2	acetyl-CoA acyltransferase 2	0.3404	4.48036	4.82074	0.4908
ENSMUSG00000018339	Gpx3	glutathione peroxidase 3	0.4307	3.23299	3.6637	0.4923
ENSMUSG00000025733	Rhot2	ras homolog family member T2	0.1545	6.73723	6.89176	0.4924
ENSMUSG00000038331	Satb2	special AT-rich sequence binding protein 2	-0.4755	4.2149	3.73945	0.4927
ENSMUSG00000026834	Acvr1c	activin A receptor, type IC	0.4258	3.53565	3.9615	0.4935
ENSMUSG00000001482	Def8	differentially expressed in FDCP 8	0.2311	5.41702	5.64809	0.4935
ENSMUSG00000047407	Tgif1	TGFB-induced factor homeobox 1	-0.5918	2.42168	1.82993	0.494
ENSMUSG00000060548	Tnfrsf19	tumor necrosis factor receptor superfamily, member...	-0.2035	6.03254	5.82909	0.4942
ENSMUSG00000096727	Psmb9	proteasome (prosome, macropain) subunit, beta type...	-0.576	2.40229	1.82626	0.4947
ENSMUSG00000030616	Sytl2	synaptotagmin-like 2	-0.2449	5.83468	5.58978	0.4947
ENSMUSG00000031782	Coq9	coenzyme Q9	0.2058	5.85905	6.0648	0.4947
ENSMUSG00000079215	Zfp664	zinc finger protein 664	0.1492	6.81609	6.9653	0.4947
ENSMUSG00000042312	S100a13	S100 calcium binding protein A13	-0.3362	4.61197	4.27577	0.4953
ENSMUSG00000041571	Selenow	selenoprotein W	0.1488	9.32856	9.47736	0.4954
ENSMUSG00000018659	Pnpo	pyridoxine 5'-phosphate oxidase	0.2143	5.68232	5.89662	0.4959
ENSMUSG00000033152	Podxl2	podocalyxin-like 2	0.169	7.31901	7.488	0.4979
ENSMUSG00000031349	Nsdhl	NAD(P) dependent steroid dehydrogenase-like	0.3169	4.47433	4.79126	0.4994
ENSMUSG00000066026	Dhrs3	dehydrogenase/reductase 3	-0.2993	4.7645	4.46517	0.5016
ENSMUSG00000042608	Stk40	serine/threonine kinase 40	-0.2576	5.39849	5.1409	0.5016
ENSMUSG00000029064	Gnb1	guanine nucleotide binding protein (G protein), be...	0.0769	9.14785	9.22474	0.5016
ENSMUSG00000038244	Mical2	microtubule associated monooxygenase, calponin and...	-0.2768	8.93466	8.65789	0.5017
ENSMUSG00000051111	Sv2c	synaptic vesicle glycoprotein 2c	0.5685	2.3709	2.93943	0.5025
ENSMUSG00000036564	Ndrg4	N-myc downstream regulated gene 4	0.0911	10.6726	10.7637	0.5025
ENSMUSG00000031538	Plat	plasminogen activator, tissue	-0.2549	5.43035	5.17546	0.5051
ENSMUSG00000028833	Ncdn	neurochondrin	0.1568	10.982	11.1388	0.5056
ENSMUSG00000008398	Elk3	ELK3, member of ETS oncogene family	-0.4477	3.81549	3.36782	0.5063
ENSMUSG00000028530	Jak1	Janus kinase 1	-0.1289	7.4253	7.29642	0.5063
ENSMUSG00000020850	Prpf8	pre-mRNA processing factor 8	-0.1097	7.92297	7.81332	0.5064
ENSMUSG00000029510	Gpc2	glypican 2 cerebroglycan	-0.4201	3.81622	3.39614	0.5074
ENSMUSG00000027520	Zdbf2	zinc finger, DBF-type containing 2	0.3955	4.0523	4.44779	0.5074
ENSMUSG00000027544	Nfatc2	nuclear factor of activated T cells, cytoplasmic, ...	0.2908	4.45696	4.74772	0.5074
ENSMUSG00000023942	Slc29a1	solute carrier family 29 (nucleoside transporters)...	0.2508	4.61729	4.86808	0.5074
ENSMUSG00000047786	Lix1	limb and CNS expressed 1	-0.2496	5.52249	5.2729	0.5074
ENSMUSG00000079487	Med12	mediator complex subunit 12	-0.1771	6.38183	6.20477	0.5074
ENSMUSG00000029838	Ptn	pleiotrophin	0.1525	7.71529	7.86782	0.5074
ENSMUSG00000093593	Gm20683	predicted gene 20683	0.1397	7.00312	7.14285	0.5074
ENSMUSG00000039262	Prrc2b	proline-rich coiled-coil 2B	0.1103	9.03471	9.145	0.5095
ENSMUSG00000018012	Rac3	Rac family small GTPase 3	0.3448	3.88055	4.22536	0.5105
ENSMUSG00000022508	Bcl6	B cell leukemia/lymphoma 6	-0.2512	5.84397	5.59277	0.5162
ENSMUSG00000068739	Sars1	seryl-tRNA synthetase 1	-0.1243	7.81168	7.68734	0.517
ENSMUSG00000031673	Cdh11	cadherin 11	-0.2348	5.95392	5.71907	0.5181
ENSMUSG00000032330	Cox7a2	cytochrome c oxidase subunit 7A2	0.1572	6.79261	6.94979	0.5187
ENSMUSG00000028514	Usp24	ubiquitin specific peptidase 24	-0.1502	6.91804	6.76781	0.5237
ENSMUSG00000062866	Phactr2	phosphatase and actin regulator 2	0.2783	4.91585	5.19417	0.528
ENSMUSG00000024601	Isoc1	isochorismatase domain containing 1	0.3411	3.87135	4.21243	0.5308
ENSMUSG00000036242	Armh4	armadillo-like helical domain containing 4	0.2943	4.58233	4.87663	0.5308
ENSMUSG00000056820	Tsnax	translin-associated factor X	0.1257	7.35125	7.47693	0.5308
ENSMUSG00000005198	Polr2a	polymerase (RNA) II (DNA directed) polypeptide A	-0.1407	7.05271	6.91202	0.5316
ENSMUSG00000055322	Tns1	tensin 1	-0.2175	5.99476	5.77726	0.5317
ENSMUSG00000045589	Frrs1l	ferric-chelate reductase 1 like	-0.1598	8.06848	7.90872	0.5317
ENSMUSG00000027602	Map1lc3a	microtubule-associated protein 1 light chain 3 alp...	0.155	6.9024	7.05738	0.5317
ENSMUSG00000038156	Spon1	spondin 1, (f-spondin) extracellular matrix protei...	0.1639	6.61949	6.78342	0.5325
ENSMUSG00000022040	Ephx2	epoxide hydrolase 2, cytoplasmic	-0.3199	4.87009	4.55016	0.5327
ENSMUSG00000024245	Tmem178	transmembrane protein 178	-0.3065	5.6908	5.38431	0.5328
ENSMUSG00000054072	Iigp1	interferon inducible GTPase 1	-0.6116	2.6894	2.07776	0.5333
ENSMUSG00000003199	Mpnd	MPN domain containing	0.1798	6.31836	6.49814	0.5333
ENSMUSG00000022186	Oxct1	3-oxoacid CoA transferase 1	-0.09314	8.20789	8.11475	0.5333
ENSMUSG00000078794	Dact3	dishevelled-binding antagonist of beta-catenin 3	0.1421	7.00975	7.15183	0.5335
ENSMUSG00000021876	Rnase4	ribonuclease, RNase A family 4	-0.3068	4.66746	4.36066	0.5361
ENSMUSG00000055003	Lrtm2	leucine-rich repeats and transmembrane domains 2	0.1737	5.9916	6.1653	0.5361
ENSMUSG00000015501	Hivep2	human immunodeficiency virus type I enhancer bindi...	-0.1532	8.08298	7.92981	0.5361
ENSMUSG00000049866	Arl4c	ADP-ribosylation factor-like 4C	-0.2348	5.99692	5.76211	0.5362
ENSMUSG00000011832	Evi5l	ecotropic viral integration site 5 like	0.1456	6.83815	6.98377	0.5374
ENSMUSG00000024587	Nars1	asparaginyl-tRNA synthetase 1	-0.1126	7.83528	7.72266	0.5392
ENSMUSG00000034462	Pkd2	polycystin 2, transient receptor potential cation ...	-0.1891	6.04719	5.85809	0.5393
ENSMUSG00000017344	Vtn	vitronectin	-0.2321	6.3621	6.12996	0.5398
ENSMUSG00000102422	Iqschfp	Iqcj and Schip1 fusion protein	-0.1777	7.54089	7.3632	0.5407
ENSMUSG00000027007	Itprid2	ITPR interacting domain containing 2	-0.1983	6.1112	5.91293	0.541
ENSMUSG00000026615	Eprs1	glutamyl-prolyl-tRNA synthetase 1	-0.1475	6.79515	6.64762	0.541
ENSMUSG00000036181	H1f2	H1.2 linker histone, cluster member	-0.2809	4.82398	4.54309	0.5423
ENSMUSG00000058070	Eml1	echinoderm microtubule associated protein like 1	0.1835	5.8521	6.03564	0.5423
ENSMUSG00000022307	Oxr1	oxidation resistance 1	-0.1613	7.79234	7.63104	0.5423
ENSMUSG00000038900	Rpl12	ribosomal protein L12	-0.1413	7.32467	7.18336	0.5423
ENSMUSG00000036955	Kifbp	kinesin family binding protein	-0.1194	7.64825	7.52883	0.5423
ENSMUSG00000029221	Slc30a9	solute carrier family 30 (zinc transporter), membe...	0.1241	7.30722	7.43132	0.5463
ENSMUSG00000029661	Col1a2	collagen, type I, alpha 2	0.6231	3.07139	3.69451	0.5478
ENSMUSG00000018899	Irf1	interferon regulatory factor 1	-0.4129	3.82142	3.40853	0.5478
ENSMUSG00000051617	Krt9	keratin 9	0.3505	3.44636	3.79683	0.5478
ENSMUSG00000050121	Opalin	oligodendrocytic myelin paranodal and inner loop p...	-0.2486	5.36377	5.11512	0.5478
ENSMUSG00000033009	Ogfod1	2-oxoglutarate and iron-dependent oxygenase domain...	0.1408	6.895	7.03581	0.5478
ENSMUSG00000039621	Prex1	phosphatidylinositol-3,4,5-trisphosphate-dependent...	-0.1346	7.04228	6.90773	0.5478
ENSMUSG00000006435	Neurl1a	neuralized E3 ubiquitin protein ligase 1A	0.1771	7.31424	7.49136	0.5479
ENSMUSG00000035390	Brsk1	BR serine/threonine kinase 1	0.09256	8.6994	8.79196	0.5479
ENSMUSG00000030739	Myh14	myosin, heavy polypeptide 14	0.1832	6.21331	6.3965	0.5513
ENSMUSG00000001988	Npas1	neuronal PAS domain protein 1	-0.3989	4.0724	3.67347	0.5521
ENSMUSG00000029651	Mtus2	microtubule associated tumor suppressor candidate ...	0.2383	5.39762	5.6359	0.5552
ENSMUSG00000067925	Rtl8a	retrotransposon Gag like 8A	0.2012	5.56877	5.76994	0.5552
ENSMUSG00000033467	Crlf2	cytokine receptor-like factor 2	-0.3482	4.37407	4.0259	0.5557
ENSMUSG00000021342	Prl	prolactin	0.7557	1.10455	1.86028	0.5567
ENSMUSG00000028360	Slc44a5	solute carrier family 44, member 5	-0.3178	5.29222	4.97443	0.5575
ENSMUSG00000020736	Nt5c	5',3'-nucleotidase, cytosolic	0.24	4.98478	5.22476	0.561
ENSMUSG00000008540	Mgst1	microsomal glutathione S-transferase 1	-0.384	4.05479	3.67082	0.5618
ENSMUSG00000026510	Trp53bp2	transformation related protein 53 binding protein ...	-0.1982	5.80863	5.61041	0.5618
ENSMUSG00000020758	Itgb4	integrin beta 4	0.2988	4.24797	4.54676	0.5621
ENSMUSG00000032737	Inppl1	inositol polyphosphate phosphatase-like 1	-0.227	5.59773	5.37069	0.5621
ENSMUSG00000034958	Atcay	ataxia, cerebellar, Cayman type	0.1126	7.69802	7.81063	0.5621
ENSMUSG00000004609	Cd33	CD33 molecule	-0.4879	3.23784	2.74999	0.5623
ENSMUSG00000028048	Gba1	glucosylceramidase beta 1	-0.2317	5.49251	5.26081	0.5642
ENSMUSG00000028599	Tnfrsf1b	tumor necrosis factor receptor superfamily, member...	-0.5731	3.30629	2.73319	0.5645
ENSMUSG00000052681	Rap1b	RAS related protein 1b	-0.2202	5.68025	5.46004	0.5647
ENSMUSG00000020422	Tns3	tensin 3	-0.1549	6.73701	6.58209	0.5647
ENSMUSG00000067924	Rtl8b	retrotransposon Gag like 8B	0.1833	6.05335	6.23668	0.5666
ENSMUSG00000015599	Ttbk1	tau tubulin kinase 1	0.1578	6.48523	6.64306	0.5678
ENSMUSG00000079547	H2-DMb1	histocompatibility 2, class II, locus Mb1	-0.6528	2.45101	1.7982	0.5737
ENSMUSG00000020053	Igf1	insulin-like growth factor 1	-0.4187	3.38079	2.96206	0.5737
ENSMUSG00000049191	Rtl5	retrotransposon Gag like 5	0.3094	4.10796	4.41733	0.5737
ENSMUSG00000059013	Sh2d3c	SH2 domain containing 3C	-0.297	4.72201	4.42505	0.5737
ENSMUSG00000044583	Tlr7	toll-like receptor 7	-0.5824	2.76415	2.18175	0.5739
ENSMUSG00000031667	Aktip	AKT interacting protein	0.1464	6.93289	7.07927	0.5739
ENSMUSG00000024958	Gpr137	G protein-coupled receptor 137	0.1522	6.66307	6.81523	0.5742
ENSMUSG00000020923	Ubtf	upstream binding transcription factor, RNA polymer...	-0.1139	7.57595	7.46205	0.5758
ENSMUSG00000033355	Rtp4	receptor transporter protein 4	-0.5138	2.71282	2.19904	0.577
ENSMUSG00000032554	Trf	transferrin	-0.3287	9.12929	8.80061	0.5778
ENSMUSG00000044629	Cnrip1	cannabinoid receptor interacting protein 1	-0.1895	6.43682	6.24734	0.579
ENSMUSG00000050357	Carmil2	capping protein regulator and myosin 1 linker 2	0.1686	6.34964	6.51827	0.5794
ENSMUSG00000027574	Nkain4	Na+/K+ transporting ATPase interacting 4	0.2667	4.73571	5.00241	0.5797
ENSMUSG00000024948	Map4k2	mitogen-activated protein kinase kinase kinase kin...	0.164	6.70577	6.86974	0.5803
ENSMUSG00000071649	B3gat3	beta-1,3-glucuronyltransferase 3	0.1336	7.03137	7.16494	0.5833
ENSMUSG00000024576	Csnk1a1	casein kinase 1, alpha 1	-0.1073	8.06722	7.95988	0.5839
ENSMUSG00000008604	Ubqln4	ubiquilin 4	0.1292	7.15215	7.28136	0.5855
ENSMUSG00000024033	Rsph1	radial spoke head 1 homolog (Chlamydomonas)	0.4996	2.73135	3.23095	0.5858
ENSMUSG00000090122	Kcne5	potassium voltage-gated channel subfamily E regula...	-0.418	3.41295	2.99496	0.5866
ENSMUSG00000007655	Cav1	caveolin 1, caveolae protein	-0.3674	4.25599	3.88861	0.5866
ENSMUSG00000010154	Spire2	spire type actin nucleation factor 2	0.3311	4.09605	4.42711	0.5866
ENSMUSG00000052928	Ctif	CBP80/20-dependent translation initiation factor	0.1677	6.44548	6.61317	0.5866
ENSMUSG00000008200	Fnbp4	formin binding protein 4	-0.1643	6.36979	6.20544	0.5866
ENSMUSG00000032536	Trak1	trafficking protein, kinesin binding 1	0.1206	7.40482	7.52539	0.5876
ENSMUSG00000028542	Slc6a9	solute carrier family 6 (neurotransmitter transpor...	0.2068	5.84035	6.04713	0.5888
ENSMUSG00000020483	Dynll2	dynein light chain LC8-type 2	0.1186	9.10607	9.22471	0.5888
ENSMUSG00000044067	Gpr22	G protein-coupled receptor 22	-0.2891	6.02831	5.73922	0.5894
ENSMUSG00000021451	Sema4d	sema domain, immunoglobulin domain (Ig), transmemb...	-0.2031	5.83522	5.63209	0.5902
ENSMUSG00000003484	Cyp4f18	cytochrome P450, family 4, subfamily f, polypeptid...	-0.1921	0.60698	0.41489	0.5902
ENSMUSG00000021803	Cdhr1	cadherin-related family member 1	0.4099	3.2092	3.61906	0.5904
ENSMUSG00000074637	Sox2	SRY (sex determining region Y)-box 2	-0.2263	5.46392	5.23767	0.5904
ENSMUSG00000000378	Ccm2	cerebral cavernous malformation 2	0.2052	5.44165	5.64682	0.5904
ENSMUSG00000027777	Schip1	schwannomin interacting protein 1	-0.1771	7.58591	7.40879	0.5904
ENSMUSG00000022474	Pmm1	phosphomannomutase 1	0.1312	7.12855	7.25971	0.5904
ENSMUSG00000021196	Pfkp	phosphofructokinase, platelet	-0.09271	8.13074	8.03803	0.5904
ENSMUSG00000049612	Omg	oligodendrocyte myelin glycoprotein	-0.1438	6.85702	6.71327	0.5917
ENSMUSG00000037860	Aim2	absent in melanoma 2	-0.5619	2.96094	2.39902	0.5924
ENSMUSG00000035681	Kcnc2	potassium voltage gated channel, Shaw-related subf...	0.1714	6.37327	6.54467	0.5924
ENSMUSG00000030793	Pycard	PYD and CARD domain containing	-0.6342	2.52494	1.89072	0.5939
ENSMUSG00000021270	Hsp90aa1	heat shock protein 90, alpha (cytosolic), class A ...	-0.1398	9.54704	9.40727	0.5954
ENSMUSG00000020372	Rack1	receptor for activated C kinase 1	-0.1181	7.66416	7.54611	0.5954
ENSMUSG00000038807	Rap1gap2	RAP1 GTPase activating protein 2	0.1475	7.15172	7.29918	0.5966
ENSMUSG00000015087	Rabl6	RAB, member RAS oncogene family-like 6	0.1199	7.42816	7.54811	0.5966
ENSMUSG00000030551	Nr2f2	nuclear receptor subfamily 2, group F, member 2	0.3441	4.61758	4.96168	0.5988
ENSMUSG00000049265	Kcnk3	potassium channel, subfamily K, member 3	0.3274	3.99402	4.32137	0.5991
ENSMUSG00000046807	Lrrc75b	leucine rich repeat containing 75B	0.299	4.07142	4.37047	0.5995
ENSMUSG00000070306	Ccdc153	coiled-coil domain containing 153	0.5377	2.33587	2.87359	0.6002
ENSMUSG00000005611	Irag1	inositol 1,4,5-triphosphate receptor associated 1	0.4644	1.85469	2.31909	0.6003
ENSMUSG00000047810	Ccdc88b	coiled-coil domain containing 88B	-0.4392	3.65924	3.22006	0.6003
ENSMUSG00000043531	Sorcs1	sortilin-related VPS10 domain containing receptor ...	0.2986	4.08592	4.3845	0.6003
ENSMUSG00000027962	Vcam1	vascular cell adhesion molecule 1	-0.274	5.09089	4.81689	0.6003
ENSMUSG00000021124	Vti1b	vesicle transport through interaction with t-SNARE...	0.1411	6.85487	6.99596	0.6003
ENSMUSG00000093701	Gm21970	predicted gene 21970	-0.3612	3.9708	3.60957	0.601
ENSMUSG00000039206	Daglb	diacylglycerol lipase, beta	-0.2155	5.71097	5.49551	0.601
ENSMUSG00000024456	Diaph1	diaphanous related formin 1	0.1715	6.16674	6.33829	0.601
ENSMUSG00000049313	Sorl1	sortilin-related receptor, LDLR class A repeats-co...	-0.1249	8.39431	8.26945	0.601
ENSMUSG00000021282	Eif5	eukaryotic translation initiation factor 5	-0.1174	7.54761	7.43021	0.601
ENSMUSG00000028874	Fgr	FGR proto-oncogene, Src family tyrosine kinase	-0.917	1.78952	0.87254	0.6015
ENSMUSG00000000982	Ccl3	C-C motif chemokine ligand 3	-0.7637	1.82729	1.06362	0.6015
ENSMUSG00000033016	Nfatc1	nuclear factor of activated T cells, cytoplasmic, ...	-0.3828	3.58145	3.1986	0.6015
ENSMUSG00000028923	Necap2	NECAP endocytosis associated 2	-0.2268	5.50892	5.28212	0.6015
ENSMUSG00000002489	Tiam1	T cell lymphoma invasion and metastasis 1	0.146	6.85138	6.9974	0.6015
ENSMUSG00000006057	Atp5mc1	ATP synthase membrane subunit c locus 1	0.1446	6.76216	6.90676	0.6015
ENSMUSG00000056812	St8sia3	ST8 alpha-N-acetyl-neuraminide alpha-2,8-sialyltra...	0.1334	7.0349	7.16834	0.6015
ENSMUSG00000070003	Ssbp4	single stranded DNA binding protein 4	0.1531	6.90826	7.06132	0.6026
ENSMUSG00000044674	Fzd1	frizzled class receptor 1	0.3757	3.39031	3.766	0.603
ENSMUSG00000025511	Tspan4	tetraspanin 4	-0.3491	4.42668	4.07755	0.603
ENSMUSG00000033594	Spata2l	spermatogenesis associated 2-like	0.1973	5.44563	5.64295	0.603
ENSMUSG00000028412	Slc44a1	solute carrier family 44, member 1	-0.1521	6.72863	6.57651	0.603
ENSMUSG00000069662	Marcks	myristoylated alanine rich protein kinase C substr...	-0.1519	6.70634	6.55439	0.603
ENSMUSG00000024907	Gal	galanin and GMAP prepropeptide	0.1244	0.51568	0.64007	0.603
ENSMUSG00000037754	Ppp1r16b	protein phosphatase 1, regulatory subunit 16B	0.1225	7.30091	7.42336	0.603
ENSMUSG00000022265	Ank	progressive ankylosis	-0.1016	7.8228	7.72122	0.603
ENSMUSG00000029059	Prxl2b	peroxiredoxin like 2B	0.1946	5.95052	6.14513	0.6032
ENSMUSG00000031065	Cdk16	cyclin dependent kinase 16	0.1026	7.95617	8.05874	0.6032
ENSMUSG00000045007	Tubg2	tubulin, gamma 2	0.2135	5.5438	5.75727	0.604
ENSMUSG00000020580	Rock2	Rho-associated coiled-coil containing protein kina...	-0.1259	7.58906	7.46314	0.604
ENSMUSG00000021457	Syk	spleen tyrosine kinase	-0.4779	3.38092	2.90306	0.6043
ENSMUSG00000026890	Lhx6	LIM homeobox protein 6	-0.3789	4.7758	4.39686	0.6043
ENSMUSG00000057596	Trim30d	tripartite motif-containing 30D	-0.6621	2.63489	1.97282	0.6052
ENSMUSG00000048349	Pou4f1	POU domain, class 4, transcription factor 1	0.4473	0.41433	0.86166	0.6052
ENSMUSG00000021556	Golm1	golgi membrane protein 1	-0.3668	6.57992	6.21309	0.6052
ENSMUSG00000063659	Zbtb18	zinc finger and BTB domain containing 18	-0.3348	8.71991	8.38514	0.6052
ENSMUSG00000012848	Rps5	ribosomal protein S5	-0.1279	7.56989	7.44203	0.6052
ENSMUSG00000054455	Vapb	vesicle-associated membrane protein, associated pr...	0.1189	7.25784	7.3767	0.6052
ENSMUSG00000041736	Tspo	translocator protein	-0.5098	3.19955	2.68976	0.6059
ENSMUSG00000025130	P4hb	prolyl 4-hydroxylase, beta polypeptide	-0.1287	7.16155	7.03287	0.606
ENSMUSG00000026676	Ccdc3	coiled-coil domain containing 3	-0.3037	4.37396	4.0703	0.6067
ENSMUSG00000039671	Zmynd8	zinc finger, MYND-type containing 8	-0.1098	7.55991	7.45013	0.6067
ENSMUSG00000031791	Tmem38a	transmembrane protein 38A	0.1434	6.80405	6.94742	0.607
ENSMUSG00000026181	Ppm1f	protein phosphatase 1F (PP2C domain containing)	0.168	6.22043	6.38839	0.6071
ENSMUSG00000018765	Fxr2	FMR1 autosomal homolog 2	0.1275	7.20665	7.33413	0.6071
ENSMUSG00000026380	Tfcp2l1	transcription factor CP2-like 1	-0.4683	3.53703	3.06871	0.6072
ENSMUSG00000061518	Cox5b	cytochrome c oxidase subunit 5B	0.1567	7.39257	7.54924	0.608
ENSMUSG00000036199	Ndufa13	NADH:ubiquinone oxidoreductase subunit A13	0.1391	7.23494	7.37403	0.6082
ENSMUSG00000032556	Bfsp2	beaded filament structural protein 2, phakinin	-0.4839	3.4303	2.94636	0.6088
ENSMUSG00000023832	Acat2	acetyl-Coenzyme A acetyltransferase 2	0.2663	4.81296	5.0793	0.6094
ENSMUSG00000056201	Cfl1	cofilin 1, non-muscle	-0.09381	9.89782	9.80401	0.6094
ENSMUSG00000081683	Fzd10	frizzled class receptor 10	0.5695	1.34454	1.91408	0.6112
ENSMUSG00000037872	Ackr1	atypical chemokine receptor 1 (Duffy blood group)	0.2123	5.5744	5.78672	0.6114
ENSMUSG00000026721	Rabgap1l	RAB GTPase activating protein 1-like	-0.1726	6.86339	6.69081	0.6114
ENSMUSG00000052889	Prkcb	protein kinase C, beta	0.1325	7.98673	8.11919	0.6134
ENSMUSG00000079477	Rab7	RAB7, member RAS oncogene family	-0.08055	8.50046	8.41991	0.6145
ENSMUSG00000031987	Egln1	egl-9 family hypoxia-inducible factor 1	0.1674	6.31362	6.48102	0.6147
ENSMUSG00000018750	Zbtb4	zinc finger and BTB domain containing 4	0.1177	7.3624	7.48013	0.6168
ENSMUSG00000031661	Nkd1	naked cuticle 1	0.3047	3.797	4.10169	0.6173
ENSMUSG00000027605	Acss2	acyl-CoA synthetase short-chain family member 2	0.1874	5.79873	5.9861	0.6173
ENSMUSG00000027763	Mbnl1	muscleblind like splicing regulator 1	-0.1682	6.40557	6.23738	0.6173
ENSMUSG00000000308	Ckmt1	creatine kinase, mitochondrial 1, ubiquitous	0.1501	7.69746	7.84761	0.6173
ENSMUSG00000008668	Rps18	ribosomal protein S18	-0.1389	7.12644	6.9875	0.6173
ENSMUSG00000059182	Skap2	src family associated phosphoprotein 2	-0.3364	4.19371	3.8573	0.6187
ENSMUSG00000028758	Kif17	kinesin family member 17	0.2447	4.96851	5.21316	0.6187
ENSMUSG00000026452	Syt2	synaptotagmin II	0.2661	5.1966	5.4627	0.6211
ENSMUSG00000060227	Golm2	golgi membrane protein 2	-0.151	6.65873	6.50777	0.6218
ENSMUSG00000021577	Sdha	succinate dehydrogenase complex, subunit A, flavop...	0.08489	8.63887	8.72376	0.6218
ENSMUSG00000031983	2310022B05Rik	RIKEN cDNA 2310022B05 gene	0.2164	6.69506	6.91141	0.6219
ENSMUSG00000026482	Rgl1	ral guanine nucleotide dissociation stimulator,-li...	-0.1549	6.99155	6.83664	0.6222
ENSMUSG00000044352	Sowaha	sosondowah ankyrin repeat domain family member A	0.2022	6.52166	6.72382	0.6234
ENSMUSG00000066640	Fbxl18	F-box and leucine-rich repeat protein 18	0.1996	5.63194	5.83155	0.624
ENSMUSG00000068882	Ssb	small RNA binding exonuclease protection factor La	-0.1352	6.97279	6.83763	0.624
ENSMUSG00000036751	Cox6b1	cytochrome c oxidase, subunit 6B1	0.1308	7.46384	7.59459	0.624
ENSMUSG00000052364	B630019K06Rik	F-box and leucine-rich repeat protein 17 pseudogen...	0.2416	4.80253	5.04417	0.6241
ENSMUSG00000056529	Ptafr	platelet-activating factor receptor	-0.5495	2.38195	1.83245	0.6262
ENSMUSG00000034786	Gpsm3	G-protein signalling modulator 3 (AGS3-like, C. el...	-0.4471	2.77093	2.32381	0.6262
ENSMUSG00000043445	Pgp	phosphoglycolate phosphatase	0.262	4.77996	5.04197	0.6262
ENSMUSG00000017493	Igfbp4	insulin-like growth factor binding protein 4	-0.2332	6.44325	6.21	0.6262
ENSMUSG00000020964	Sel1l	sel-1 suppressor of lin-12-like (C. elegans)	-0.112	7.51194	7.39999	0.6262
ENSMUSG00000010097	Nxf1	nuclear RNA export factor 1	-0.1196	7.28897	7.16935	0.6269
ENSMUSG00000031960	Aars1	alanyl-tRNA synthetase 1	-0.1069	7.77853	7.67158	0.6292
ENSMUSG00000019124	Scrn1	secernin 1	0.1053	7.83403	7.93938	0.6298
ENSMUSG00000037552	Plekhg2	pleckstrin homology domain containing, family G (w...	-0.3681	3.66766	3.29954	0.6308
ENSMUSG00000058740	Kcnt1	potassium channel, subfamily T, member 1	0.2943	6.65196	6.94631	0.6321
ENSMUSG00000019775	Rgs17	regulator of G-protein signaling 17	0.206	5.59482	5.80082	0.6328
ENSMUSG00000063882	Uqcrh	ubiquinol-cytochrome c reductase hinge protein	0.1481	7.34827	7.49634	0.6343
ENSMUSG00000048583	Igf2	insulin-like growth factor 2	0.8974	5.78414	6.68155	0.6363
ENSMUSG00000021218	Gdi2	GDP dissociation inhibitor 2	-0.1011	7.88497	7.78391	0.638
ENSMUSG00000022949	Clic6	chloride intracellular channel 6	1.333	3.0983	4.43141	0.6381
ENSMUSG00000046719	Nxph3	neurexophilin 3	-0.2986	4.85101	4.55241	0.6381
ENSMUSG00000026932	Nacc2	nucleus accumbens associated 2, BEN and BTB (POZ) ...	0.1614	7.07054	7.23195	0.6381
ENSMUSG00000000275	Trim25	tripartite motif-containing 25	-0.4442	3.62876	3.18451	0.6387
ENSMUSG00000026883	Dab2ip	disabled 2 interacting protein	0.1394	6.76755	6.90698	0.6415
ENSMUSG00000045103	Dmd	dystrophin, muscular dystrophy	-0.2046	5.74893	5.54436	0.6417
ENSMUSG00000032349	Elovl5	ELOVL fatty acid elongase 5	-0.169	6.43377	6.26473	0.6417
ENSMUSG00000018548	Trim37	tripartite motif-containing 37	0.1055	8.11457	8.22005	0.6423
ENSMUSG00000029390	Tmed2	transmembrane p24 trafficking protein 2	-0.2549	5.13413	4.87927	0.6434
ENSMUSG00000103458	Pcdha4b	protocadherin alpha 4B	-0.1291	7.28193	7.15284	0.6434
ENSMUSG00000059495	Arhgef12	Rho guanine nucleotide exchange factor 12	-0.1007	7.91682	7.81612	0.6434
ENSMUSG00000024927	Rela	v-rel reticuloendotheliosis viral oncogene homolog...	-0.2343	5.20798	4.97364	0.6469
ENSMUSG00000003531	Dgcr6	DiGeorge syndrome critical region gene 6	0.202	5.56241	5.7644	0.6469
ENSMUSG00000071550	Cfap44	cilia and flagella associated protein 44	0.3627	3.60041	3.9631	0.6473
ENSMUSG00000005583	Mef2c	myocyte enhancer factor 2C	-0.3244	7.25227	6.92788	0.6479
ENSMUSG00000046613	Vwa5b2	von Willebrand factor A domain containing 5B2	0.2741	5.88546	6.15956	0.6493
ENSMUSG00000042115	Klhdc8a	kelch domain containing 8A	0.3144	3.60888	3.92329	0.6515
ENSMUSG00000071203	Naip5	NLR family, apoptosis inhibitory protein 5	-0.6944	2.53398	1.83959	0.6517
ENSMUSG00000020484	Xbp1	X-box binding protein 1	0.1737	6.09723	6.27089	0.6517
ENSMUSG00000024862	Klc2	kinesin light chain 2	0.09118	8.31397	8.40515	0.6517
ENSMUSG00000034156	Tspoap1	TSPO associated protein 1	0.1317	8.61774	8.74947	0.6518
ENSMUSG00000073557	Ppp1r12b	protein phosphatase 1, regulatory subunit 12B	0.1299	6.87109	7.00096	0.6526
ENSMUSG00000000631	Myo18a	myosin XVIIIA	-0.09419	7.95559	7.8614	0.6526
ENSMUSG00000068748	Ptprz1	protein tyrosine phosphatase receptor type Z, poly...	-0.131	7.41796	7.28693	0.6528
ENSMUSG00000016024	Lbp	lipopolysaccharide binding protein	0.8362	2.67043	3.5066	0.6529
ENSMUSG00000048483	Zdhhc22	zinc finger, DHHC-type containing 22	0.4418	2.31697	2.7588	0.6529
ENSMUSG00000037606	Osbpl5	oxysterol binding protein-like 5	0.2394	4.57706	4.81647	0.6529
ENSMUSG00000014313	Cox6c	cytochrome c oxidase subunit 6C	0.1235	7.51806	7.64155	0.6529
ENSMUSG00000028851	Nudc	nudC nuclear distribution protein	0.1246	7.20483	7.32939	0.6562
ENSMUSG00000020607	Lratd1	LRAT domain containing 1	0.2152	5.89677	6.11196	0.6571
ENSMUSG00000024472	Dcp2	decapping mRNA 2	0.1935	5.71466	5.90814	0.6578
ENSMUSG00000069874	Irgm2	immunity-related GTPase family M member 2	-0.4826	3.13046	2.64787	0.6587
ENSMUSG00000040596	Pogk	pogo transposable element with KRAB domain	0.1589	6.20996	6.36891	0.6596
ENSMUSG00000008690	Ncaph2	non-SMC condensin II complex, subunit H2	0.1384	6.84307	6.98146	0.6608
ENSMUSG00000045201	Lrrc3b	leucine rich repeat containing 3B	0.4009	3.04304	3.44392	0.6627
ENSMUSG00000040373	Cacng5	calcium channel, voltage-dependent, gamma subunit ...	0.3164	4.03038	4.34683	0.6627
ENSMUSG00000052593	Adam17	a disintegrin and metallopeptidase domain 17	-0.2878	4.65541	4.36765	0.6627
ENSMUSG00000032038	St3gal4	ST3 beta-galactoside alpha-2,3-sialyltransferase 4	0.2723	4.3047	4.57701	0.6627
ENSMUSG00000024620	Pdgfrb	platelet derived growth factor receptor, beta poly...	-0.2696	5.01427	4.74464	0.6627
ENSMUSG00000033488	Cryzl2	crystallin zeta like 2	-0.352	4.20992	3.85795	0.6629
ENSMUSG00000026858	Miga2	mitoguardin 2	0.1477	6.53803	6.68573	0.6629
ENSMUSG00000062070	Pgk1	phosphoglycerate kinase 1	0.106	7.63649	7.74247	0.6648
ENSMUSG00000006333	Rps9	ribosomal protein S9	-0.1364	8.01579	7.87935	0.6666
ENSMUSG00000056174	Col8a2	collagen, type VIII, alpha 2	0.7964	2.08667	2.88308	0.6667
ENSMUSG00000063450	Syne2	spectrin repeat containing, nuclear envelope 2	-0.2575	5.10889	4.85143	0.6689
ENSMUSG00000061175	Fnip2	folliculin interacting protein 2	-0.2484	4.88352	4.63509	0.6692
ENSMUSG00000074264	Amy1	amylase 1, salivary	0.2244	5.29111	5.51554	0.6692
ENSMUSG00000025190	Got1	glutamic-oxaloacetic transaminase 1, soluble	0.0962	8.3799	8.4761	0.6703
ENSMUSG00000061759	Armt1	acidic residue methyltransferase 1	0.3078	4.13491	4.44267	0.6706
ENSMUSG00000071659	Hnrnpul2	heterogeneous nuclear ribonucleoprotein U-like 2	-0.08619	8.13649	8.0503	0.6706
ENSMUSG00000036362	P2ry13	purinergic receptor P2Y, G-protein coupled 13	-0.332	4.14206	3.81006	0.671
ENSMUSG00000027499	Pkia	protein kinase inhibitor, alpha	0.1424	6.60296	6.7454	0.671
ENSMUSG00000060260	Pwwp2b	PWWP domain containing 2B	0.2468	4.64474	4.89154	0.6714
ENSMUSG00000056972	Magel2	MAGE family member L2	0.55	1.74353	2.29352	0.6716
ENSMUSG00000041112	Elmo1	engulfment and cell motility 1	0.2135	6.39922	6.6127	0.6716
ENSMUSG00000029433	Diablo	diablo, IAP-binding mitochondrial protein	-0.2454	5.08862	4.84321	0.6718
ENSMUSG00000022122	Ednrb	endothelin receptor type B	-0.2036	5.69311	5.48952	0.6718
ENSMUSG00000053519	Kcnip1	Kv channel-interacting protein 1	0.2175	4.60966	4.82715	0.6729
ENSMUSG00000057098	Ebf1	early B cell factor 1	0.4161	1.76184	2.17794	0.6735
ENSMUSG00000018102	H2bc4	H2B clustered histone 4	-0.2456	5.22951	4.98395	0.6735
ENSMUSG00000046167	Gldn	gliomedin	-0.5844	2.26252	1.67816	0.674
ENSMUSG00000025017	Pik3ap1	phosphoinositide-3-kinase adaptor protein 1	-0.5268	2.63658	2.10976	0.674
ENSMUSG00000069372	Ctxn3	cortexin 3	0.4958	1.69511	2.1909	0.674
ENSMUSG00000034330	Plcg2	phospholipase C, gamma 2	-0.379	3.69081	3.31185	0.674
ENSMUSG00000014956	Ppp1cb	protein phosphatase 1 catalytic subunit beta	0.1167	7.49196	7.60863	0.674
ENSMUSG00000026442	Nfasc	neurofascin	-0.09401	8.6688	8.57479	0.674
ENSMUSG00000034009	Rxfp1	relaxin/insulin-like family peptide receptor 1	-0.5196	4.60674	4.08715	0.675
ENSMUSG00000045932	Ifit2	interferon-induced protein with tetratricopeptide ...	-0.3805	3.79324	3.41273	0.675
ENSMUSG00000002233	Rhoc	ras homolog family member C	-0.3133	4.37286	4.05961	0.6751
ENSMUSG00000071847	Apcdd1	adenomatosis polyposis coli down-regulated 1	-0.279	4.88162	4.60263	0.6751
ENSMUSG00000036052	Dnajb5	DnaJ heat shock protein family (Hsp40) member B5	-0.1302	7.59695	7.46672	0.6751
ENSMUSG00000008999	Bmp7	bone morphogenetic protein 7	0.4325	3.31979	3.75234	0.6761
ENSMUSG00000040543	Pitpnm3	PITPNM family member 3	0.1861	6.13727	6.3234	0.6761
ENSMUSG00000063594	Gng8	guanine nucleotide binding protein (G protein), ga...	0.5035	1.11288	1.61641	0.678
ENSMUSG00000047496	Rnf152	ring finger protein 152	0.3669	2.96605	3.333	0.6787
ENSMUSG00000038805	Six3	sine oculis-related homeobox 3	0.7637	0.80111	1.56483	0.6789
ENSMUSG00000061576	Dpp6	dipeptidylpeptidase 6	0.09569	8.55037	8.64606	0.6789
ENSMUSG00000035004	Igsf6	immunoglobulin superfamily, member 6	-0.6353	1.94684	1.31155	0.6798
ENSMUSG00000001270	Ckb	creatine kinase, brain	-0.1785	10.332	10.1535	0.68
ENSMUSG00000001131	Timp1	tissue inhibitor of metalloproteinase 1	-0.8161	1.75263	0.9365	0.6801
ENSMUSG00000053093	Myh7	myosin, heavy polypeptide 7, cardiac muscle, beta	0.3731	3.52533	3.8984	0.6801
ENSMUSG00000024647	Cbln2	cerebellin 2 precursor protein	0.3025	3.27143	3.57397	0.6801
ENSMUSG00000028541	B4galt2	UDP-Gal:betaGlcNAc beta 1,4- galactosyltransferase...	0.1712	5.93396	6.10516	0.6801
ENSMUSG00000063063	Ctnna2	catenin alpha 2	0.1455	6.63463	6.78009	0.6801
ENSMUSG00000010476	Ebf3	early B cell factor 3	0.3555	1.72959	2.08513	0.6814
ENSMUSG00000024960	Plcb3	phospholipase C, beta 3	-0.2433	5.10914	4.86579	0.6814
ENSMUSG00000032192	Gnb5	guanine nucleotide binding protein (G protein), be...	0.1627	6.14336	6.30608	0.6814
ENSMUSG00000003283	Hck	hemopoietic cell kinase	-0.5745	2.73335	2.15887	0.6816
ENSMUSG00000024077	Strn	striatin, calmodulin binding protein	0.1639	6.02313	6.18705	0.6816
ENSMUSG00000037348	Paqr7	progestin and adipoQ receptor family member VII	0.1733	6.05444	6.22773	0.6832
ENSMUSG00000031483	Erlin2	ER lipid raft associated 2	-0.1674	6.25404	6.0866	0.6832
ENSMUSG00000068099	Smim45	small integral membrane protein 45	0.1496	6.51528	6.66488	0.6832
ENSMUSG00000091471	Gm20538	predicted gene 20538	0.1808	5.73804	5.91883	0.684
ENSMUSG00000095115	Itpripl2	inositol 1,4,5-triphosphate receptor interacting p...	-0.4221	3.50779	3.08571	0.6852
ENSMUSG00000021259	Cyp46a1	cytochrome P450, family 46, subfamily a, polypepti...	0.157	7.49292	7.64992	0.6852
ENSMUSG00000034574	Daam1	dishevelled associated activator of morphogenesis ...	-0.1506	6.48808	6.33746	0.6852
ENSMUSG00000033565	Rbfox2	RNA binding protein, fox-1 homolog (C. elegans) 2	0.09861	7.90077	7.99938	0.6852
ENSMUSG00000031955	Bcar1	breast cancer anti-estrogen resistance 1	-0.1609	6.31695	6.15607	0.6859
ENSMUSG00000025486	Sirt3	sirtuin 3	0.1986	5.6305	5.82907	0.6862
ENSMUSG00000038811	Gngt2	guanine nucleotide binding protein (G protein), ga...	-0.5594	2.83605	2.27666	0.6887
ENSMUSG00000089922	Gm43517	predicted gene 43517	-0.341	5.88481	5.54379	0.6887
ENSMUSG00000020037	Rfx4	regulatory factor X, 4 (influences HLA class II ex...	-0.2921	4.51318	4.22109	0.6887
ENSMUSG00000009406	Elk1	ELK1, member of ETS oncogene family	-0.2031	6.31501	6.1119	0.6887
ENSMUSG00000001418	Glmp	glycosylated lysosomal membrane protein	-0.2021	5.74925	5.54716	0.6887
ENSMUSG00000036966	Spryd3	SPRY domain containing 3	0.1188	7.26766	7.38651	0.6897
ENSMUSG00000041609	Bicdl1	BICD family like cargo adaptor 1	0.1883	5.80799	5.99625	0.6901
ENSMUSG00000034544	Rsrc1	arginine/serine-rich coiled-coil 1	0.1747	5.48662	5.66133	0.6901
ENSMUSG00000017715	Pgs1	phosphatidylglycerophosphate synthase 1	0.1667	6.16392	6.33057	0.6901
ENSMUSG00000027346	Gpcpd1	glycerophosphocholine phosphodiesterase 1	-0.1473	6.64084	6.49352	0.6901
ENSMUSG00000018770	Atp5mc3	ATP synthase membrane subunit c locus 3	0.1045	7.80985	7.91438	0.6901
ENSMUSG00000017692	Rhbdl3	rhomboid like 3	0.2686	4.5218	4.79043	0.6909
ENSMUSG00000025810	Nrp1	neuropilin 1	-0.2645	6.55315	6.28861	0.6909
ENSMUSG00000039419	Cntnap2	contactin associated protein-like 2	0.1909	5.94223	6.13311	0.6909
ENSMUSG00000078429	Ctdsp2	CTD small phosphatase 2	-0.1268	7.03496	6.9082	0.6909
ENSMUSG00000038429	Usp5	ubiquitin specific peptidase 5 (isopeptidase T)	0.104	7.71041	7.81446	0.6919
ENSMUSG00000000915	Hip1r	huntingtin interacting protein 1 related	0.1534	6.60655	6.75994	0.6922
ENSMUSG00000055214	Pld5	phospholipase D family member 5	0.5675	1.83133	2.3988	0.6924
ENSMUSG00000045763	Basp1	brain abundant, membrane attached signal protein 1	-0.1132	8.62072	8.50753	0.6935
ENSMUSG00000001847	Rac1	Rac family small GTPase 1	-0.07852	8.35234	8.27382	0.6936
ENSMUSG00000021877	Arf4	ADP-ribosylation factor 4	-0.1471	6.55447	6.40739	0.6955
ENSMUSG00000060152	Pop5	processing of precursor 5, ribonuclease P/MRP fami...	0.2195	5.13458	5.35411	0.6965
ENSMUSG00000038042	Ptpdc1	protein tyrosine phosphatase domain containing 1	0.2184	5.22019	5.43864	0.6965
ENSMUSG00000036815	Dpp10	dipeptidylpeptidase 10	0.2834	5.72095	6.00434	0.6968
ENSMUSG00000022346	Myc	myelocytomatosis oncogene	-0.4703	3.13838	2.66806	0.6986
ENSMUSG00000046768	Rhoj	ras homolog family member J	-0.493	3.02389	2.53088	0.699
ENSMUSG00000047735	Samd9l	sterile alpha motif domain containing 9-like	-0.4829	2.99805	2.51519	0.699
ENSMUSG00000003418	St8sia6	ST8 alpha-N-acetyl-neuraminide alpha-2,8-sialyltra...	-0.4605	3.1491	2.68858	0.699
ENSMUSG00000034684	Sema3f	sema domain, immunoglobulin domain (Ig), short bas...	0.4153	2.85511	3.2704	0.699
ENSMUSG00000059713	Rcan3	regulator of calcineurin 3	0.2237	4.94389	5.16763	0.699
ENSMUSG00000040463	Mybbp1a	MYB binding protein (P160) 1a	-0.1489	6.50078	6.35184	0.699
ENSMUSG00000031840	Rab3a	RAB3A, member RAS oncogene family	0.1027	9.23983	9.34249	0.6994
ENSMUSG00000058897	Col25a1	collagen, type XXV, alpha 1	0.1951	5.90848	6.10361	0.7005
ENSMUSG00000039662	Icmt	isoprenylcysteine carboxyl methyltransferase	0.1638	6.14326	6.30703	0.7005
ENSMUSG00000056211	R3hdm1	R3H domain containing 1	-0.1515	8.17262	8.02115	0.7005
ENSMUSG00000037805	Rpl10a	ribosomal protein L10A	-0.1428	6.54942	6.40661	0.7007
ENSMUSG00000003500	Impdh1	inosine monophosphate dehydrogenase 1	0.1847	5.58702	5.77172	0.7012
ENSMUSG00000025571	Tnrc6c	trinucleotide repeat containing 6C	-0.1346	7.19239	7.05775	0.7018
ENSMUSG00000049422	Chchd10	coiled-coil-helix-coiled-coil-helix domain contain...	0.1468	6.86457	7.01139	0.7026
ENSMUSG00000024042	Sik1	salt inducible kinase 1	0.3344	3.91723	4.25165	0.7036
ENSMUSG00000037649	H2-DMa	histocompatibility 2, class II, locus DMa	-0.3264	4.36303	4.03667	0.7036
ENSMUSG00000006958	Chrd	chordin	-0.3113	6.68985	6.37854	0.7036
ENSMUSG00000021217	Tshz3	teashirt zinc finger family member 3	-0.2964	4.13311	3.83672	0.7036
ENSMUSG00000060477	Irak2	interleukin-1 receptor-associated kinase 2	-0.2853	4.61491	4.32958	0.7036
ENSMUSG00000039701	Usp53	ubiquitin specific peptidase 53	-0.3148	4.33265	4.01786	0.705
ENSMUSG00000026614	Slc30a10	solute carrier family 30, member 10	0.2796	4.33185	4.61147	0.705
ENSMUSG00000024261	Syt4	synaptotagmin IV	0.1291	6.93229	7.06142	0.705
ENSMUSG00000047514	Tspyl1	testis-specific protein, Y-encoded-like 1	0.116	7.43634	7.55237	0.705
ENSMUSG00000009681	Bcr	BCR activator of RhoGEF and GTPase	0.1126	7.4771	7.58972	0.705
ENSMUSG00000015653	Steap2	six transmembrane epithelial antigen of prostate 2	0.4148	3.48912	3.90397	0.7052
ENSMUSG00000000386	Mx1	MX dynamin-like GTPase 1	-0.5924	1.71079	1.11835	0.7062
ENSMUSG00000021728	Emb	embigin	0.3102	4.47573	4.78594	0.7063
ENSMUSG00000044037	Als2cl	ALS2 C-terminal like	-0.2765	4.63992	4.36343	0.7063
ENSMUSG00000026727	Rsu1	Ras suppressor protein 1	-0.2486	4.90249	4.65389	0.7063
ENSMUSG00000001120	Pcbp3	poly(rC) binding protein 3	0.1719	5.93024	6.10219	0.7063
ENSMUSG00000021057	Akap5	A kinase anchor protein 5	0.1577	5.89407	6.05177	0.7063
ENSMUSG00000023004	Tuba1b	tubulin, alpha 1B	0.1046	7.99634	8.1009	0.7063
ENSMUSG00000009090	Ap1b1	adaptor protein complex AP-1, beta 1 subunit	0.09987	7.66822	7.76809	0.7063
ENSMUSG00000060862	Zbtb40	zinc finger and BTB domain containing 40	0.3116	3.69695	4.00859	0.7076
ENSMUSG00000038936	Sccpdh	saccharopine dehydrogenase (putative)	0.1783	5.70536	5.88369	0.7078
ENSMUSG00000031818	Cox4i1	cytochrome c oxidase subunit 4I1	0.1336	8.83522	8.96886	0.7088
ENSMUSG00000027495	Fam210b	family with sequence similarity 210, member B	0.2242	5.21963	5.44381	0.711
ENSMUSG00000028337	Coro2a	coronin, actin binding protein 2A	0.2655	4.63954	4.90507	0.7111
ENSMUSG00000051527	Usp29	ubiquitin specific peptidase 29	0.4326	2.92692	3.3595	0.7141
ENSMUSG00000002668	Dennd1c	DENN domain containing 1C	-0.5245	2.51192	1.98746	0.7142
ENSMUSG00000020334	Slc22a4	solute carrier family 22 (organic cation transport...	-0.3931	4.1108	3.71767	0.7142
ENSMUSG00000020950	Foxg1	forkhead box G1	-0.3547	6.7877	6.43303	0.7142
ENSMUSG00000000792	Slc5a5	solute carrier family 5 (sodium iodide symporter),...	-0.2518	4.69737	4.44553	0.7142
ENSMUSG00000030835	Nomo1	nodal modulator 1	0.1252	7.07316	7.19839	0.7142
ENSMUSG00000021448	Shc3	src homology 2 domain-containing transforming prot...	0.4031	3.39376	3.79689	0.7147
ENSMUSG00000030513	Pcsk6	proprotein convertase subtilisin/kexin type 6	-0.2184	5.3185	5.10006	0.7151
ENSMUSG00000032936	Camkv	CaM kinase-like vesicle-associated	0.1208	9.42267	9.54344	0.7152
ENSMUSG00000041939	Mvk	mevalonate kinase	0.3127	4.11863	4.43138	0.7157
ENSMUSG00000022091	Sorbs3	sorbin and SH3 domain containing 3	-0.1793	6.01491	5.8356	0.7157
ENSMUSG00000028969	Cdk5	cyclin dependent kinase 5	0.1301	6.79983	6.92995	0.7157
ENSMUSG00000031786	Drc7	dynein regulatory complex subunit 7	0.7165	2.64403	3.36053	0.716
ENSMUSG00000024897	Apba1	amyloid beta precursor protein binding family A me...	0.09813	7.73102	7.82915	0.7174
ENSMUSG00000036256	Igfbp7	insulin-like growth factor binding protein 7	-0.3159	4.32585	4.00992	0.7185
ENSMUSG00000040229	Gpr34	G protein-coupled receptor 34	-0.3314	3.53553	3.20409	0.7211
ENSMUSG00000044177	Wfikkn2	WAP, follistatin/kazal, immunoglobulin, kunitz and...	0.5752	1.37749	1.9527	0.7219
ENSMUSG00000042331	Specc1	sperm antigen with calponin homology and coiled-co...	0.1338	6.79148	6.92532	0.7219
ENSMUSG00000020708	Psmc5	protease (prosome, macropain) 26S subunit, ATPase ...	0.1111	7.43595	7.54708	0.7219
ENSMUSG00000027375	Mal	myelin and lymphocyte protein, T cell differentiat...	0.2009	7.83361	8.03449	0.7224
ENSMUSG00000002997	Prkar2b	protein kinase, cAMP dependent regulatory, type II...	0.2328	4.79108	5.02388	0.7256
ENSMUSG00000042350	Arel1	apoptosis resistant E3 ubiquitin protein ligase 1	0.1289	7.02252	7.15144	0.7256
ENSMUSG00000024798	Htr7	5-hydroxytryptamine (serotonin) receptor 7	0.3575	3.30263	3.66009	0.7278
ENSMUSG00000044528	Tram1l1	translocation associated membrane protein 1-like 1	0.2621	4.50392	4.76603	0.7278
ENSMUSG00000022500	Litaf	LPS-induced TN factor	-0.2545	5.10553	4.85107	0.7278
ENSMUSG00000003279	Dlgap1	DLG associated protein 1	-0.1956	8.9694	8.77384	0.7278
ENSMUSG00000062580	Timm17a	translocase of inner mitochondrial membrane 17a	0.1605	6.04535	6.20583	0.7278
ENSMUSG00000040265	Dnm3	dynamin 3	0.1407	6.69067	6.83137	0.7278
ENSMUSG00000004328	Hif3a	hypoxia inducible factor 3, alpha subunit	0.3824	3.46211	3.84452	0.7301
ENSMUSG00000037727	Avp	arginine vasopressin	0.1206	0.56127	0.68188	0.7306
ENSMUSG00000033335	Dnm2	dynamin 2	-0.1379	6.62776	6.48983	0.7307
ENSMUSG00000040345	Arhgap9	Rho GTPase activating protein 9	-0.4883	1.82732	1.33902	0.7308
ENSMUSG00000008682	Rpl10	ribosomal protein L10	-0.1166	7.38773	7.27111	0.7308
ENSMUSG00000070462	Tlnrd1	talin rod domain containing 1	0.2393	4.65152	4.89079	0.7321
ENSMUSG00000025823	Pdia4	protein disulfide isomerase associated 4	-0.1836	5.98213	5.79854	0.7321
ENSMUSG00000025854	Fam20c	FAM20C, golgi associated secretory pathway kinase	0.1694	5.58456	5.75396	0.7321
ENSMUSG00000025656	Arhgef9	CDC42 guanine nucleotide exchange factor 9	0.09733	8.57063	8.66796	0.7324
ENSMUSG00000032057	Hoatz	HOATZ cilia and flagella associated protein	0.07508	0.58071	0.65579	0.7324
ENSMUSG00000026870	Cutal	cutA divalent cation tolerance homolog-like	0.06708	0.57875	0.64583	0.7324
ENSMUSG00000025337	Sbds	SBDS ribosome maturation factor	-0.153	6.39176	6.23873	0.7337
ENSMUSG00000049502	Dtx3l	deltex 3-like, E3 ubiquitin ligase	-0.3941	3.46704	3.07291	0.7345
ENSMUSG00000025739	Gng13	guanine nucleotide binding protein (G protein), ga...	0.3178	3.90746	4.22524	0.7345
ENSMUSG00000002459	Rgs20	regulator of G-protein signaling 20	-0.2819	4.80267	4.5208	0.7345
ENSMUSG00000032101	Ddx25	DEAD box helicase 25	0.2101	5.3198	5.52992	0.7345
ENSMUSG00000030168	Adipor2	adiponectin receptor 2	0.1681	6.24929	6.41742	0.7345
ENSMUSG00000001383	Zmat2	zinc finger, matrin type 2	0.09738	7.80894	7.90632	0.7345
ENSMUSG00000056692	Ilrun	inflammation and lipid regulator with UBA-like and...	0.0928	8.039	8.13181	0.7345
ENSMUSG00000015709	Arnt2	aryl hydrocarbon receptor nuclear translocator 2	-0.08231	8.2119	8.12958	0.7345
ENSMUSG00000026576	Atp1b1	ATPase, Na+/K+ transporting, beta 1 polypeptide	-0.06886	10.6961	10.6272	0.7345
ENSMUSG00000021986	Amer2	APC membrane recruitment 2	0.3447	3.79158	4.13631	0.7351
ENSMUSG00000042529	Kcnj12	potassium inwardly-rectifying channel, subfamily J...	0.4004	2.60543	3.00588	0.7352
ENSMUSG00000021108	Prkch	protein kinase C, eta	0.3195	2.50373	2.82321	0.7353
ENSMUSG00000049511	Htr1b	5-hydroxytryptamine (serotonin) receptor 1B	0.4043	2.79318	3.19748	0.7357
ENSMUSG00000040407	Akap9	A kinase anchor protein 9	0.1563	6.07346	6.22974	0.7359
ENSMUSG00000029559	2210016L21Rik	RIKEN cDNA 2210016L21 gene	0.1233	7.11455	7.23784	0.7363
ENSMUSG00000038733	Wdr26	WD repeat domain 26	-0.1234	7.07759	6.9542	0.7378
ENSMUSG00000062825	Actg1	actin, gamma, cytoplasmic 1	-0.06474	8.89068	8.82594	0.7378
ENSMUSG00000004894	Hapln2	hyaluronan and proteoglycan link protein 2	0.2181	5.17873	5.39683	0.7393
ENSMUSG00000049939	Lrrc4	leucine rich repeat containing 4	-0.178	6.73508	6.5571	0.7393
ENSMUSG00000033577	Myo6	myosin VI	-0.1137	7.31862	7.20488	0.7395
ENSMUSG00000060657	Marf1	meiosis regulator and mRNA stability 1	0.1235	7.01631	7.13985	0.7402
ENSMUSG00000000142	Axin2	axin 2	0.2099	5.03894	5.24883	0.7427
ENSMUSG00000030688	Stard10	StAR related lipid transfer domain containing 10	0.2173	4.90881	5.12611	0.7429
ENSMUSG00000029673	Auts2	autism susceptibility candidate 2	0.1633	6.53187	6.69519	0.7429
ENSMUSG00000017740	Slc12a5	solute carrier family 12, member 5	0.087	8.89247	8.97948	0.7445
ENSMUSG00000025978	Rftn2	raftlin family member 2	-0.1953	5.50595	5.3107	0.7449
ENSMUSG00000020451	Limk2	LIM domain kinase 2	0.1212	7.07456	7.19576	0.7469
ENSMUSG00000023452	Pisd	phosphatidylserine decarboxylase	-0.1493	6.43742	6.28815	0.7482
ENSMUSG00000017057	Il13ra1	interleukin 13 receptor, alpha 1	-0.4136	3.19912	2.78553	0.7487
ENSMUSG00000029471	Camkk2	calcium/calmodulin-dependent protein kinase kinase...	0.1347	7.09548	7.23017	0.7487
ENSMUSG00000041697	Cox6a1	cytochrome c oxidase subunit 6A1	0.1124	7.90836	8.02081	0.7487
ENSMUSG00000038976	Ppp1r9b	protein phosphatase 1, regulatory subunit 9B	0.09367	10.4028	10.4965	0.7493
ENSMUSG00000066258	Trim12a	tripartite motif-containing 12A	-0.4954	2.93082	2.43542	0.7497
ENSMUSG00000033981	Gria2	glutamate receptor, ionotropic, AMPA2 (alpha 2)	-0.1596	9.16059	9.00099	0.7498
ENSMUSG00000036503	Rnf13	ring finger protein 13	-0.1352	6.79333	6.65809	0.7506
ENSMUSG00000029771	Irf5	interferon regulatory factor 5	-0.4729	3.20962	2.73668	0.7512
ENSMUSG00000035237	Lcat	lecithin cholesterol acyltransferase	-0.2334	5.25062	5.01717	0.7512
ENSMUSG00000036390	Gadd45a	growth arrest and DNA-damage-inducible 45 alpha	-0.4295	3.10645	2.67696	0.7519
ENSMUSG00000035877	Zhx3	zinc fingers and homeoboxes 3	0.1595	6.20179	6.36128	0.7519
ENSMUSG00000015755	Tab2	TGF-beta activated kinase 1/MAP3K7 binding protein...	-0.142	6.496	6.35395	0.7519
ENSMUSG00000026341	Actr3	ARP3 actin-related protein 3	-0.1072	7.94696	7.83974	0.7525
ENSMUSG00000054942	Miga1	mitoguardin 1	0.1418	6.47077	6.61254	0.7537
ENSMUSG00000024248	Cox7a2l	cytochrome c oxidase subunit 7A2 like	0.1226	7.00542	7.12798	0.7537
ENSMUSG00000043733	Ptpn11	protein tyrosine phosphatase, non-receptor type 11	0.1046	7.81351	7.91806	0.7537
ENSMUSG00000018076	Med13l	mediator complex subunit 13-like	-0.1615	6.51302	6.35156	0.7544
ENSMUSG00000008136	Fhl2	four and a half LIM domains 2	-0.2991	4.93699	4.63787	0.7547
ENSMUSG00000000078	Klf6	Kruppel-like transcription factor 6	-0.2248	5.13009	4.90533	0.7548
ENSMUSG00000027400	Pdyn	prodynorphin	0.2698	4.06789	4.33771	0.7554
ENSMUSG00000028954	Nub1	negative regulator of ubiquitin-like proteins 1	0.1265	6.9005	7.02704	0.7554
ENSMUSG00000030306	Tmtc1	transmembrane and tetratricopeptide repeat contain...	0.1931	5.69774	5.89086	0.7559
ENSMUSG00000040842	Szrd1	SUZ RNA binding domain containing 1	-0.1849	5.78972	5.60482	0.7562
ENSMUSG00000054256	Msi1	musashi RNA-binding protein 1	-0.1772	5.88443	5.70725	0.7562
ENSMUSG00000042743	Sgtb	small glutamine-rich tetratricopeptide repeat (TPR...	0.1513	6.43517	6.58646	0.7562
ENSMUSG00000011751	Sptbn4	spectrin beta, non-erythrocytic 4	0.09418	8.17745	8.27163	0.7562
ENSMUSG00000024220	Zfp523	zinc finger protein 523	0.1278	6.89518	7.02298	0.7563
ENSMUSG00000041688	Amot	angiomotin	0.2699	4.46382	4.73372	0.7571
ENSMUSG00000022197	Pdzd2	PDZ domain containing 2	0.1875	5.77295	5.96043	0.7572
ENSMUSG00000001227	Sema6b	sema domain, transmembrane domain (TM), and cytopl...	0.127	6.9039	7.03094	0.7581
ENSMUSG00000031432	Prps1	phosphoribosyl pyrophosphate synthetase 1	0.1709	5.8733	6.04419	0.7595
ENSMUSG00000073490	Ifi207	interferon activated gene 207	-0.6351	1.567	0.93187	0.76
ENSMUSG00000078942	Naip6	NLR family, apoptosis inhibitory protein 6	-0.4389	1.70447	1.2656	0.76
ENSMUSG00000020098	Pcbd1	pterin 4 alpha carbinolamine dehydratase/dimerizat...	0.4453	2.29467	2.73996	0.7617
ENSMUSG00000050541	Adra1b	adrenergic receptor, alpha 1b	0.4009	2.37792	2.77883	0.7623
ENSMUSG00000051065	Mb21d2	Mab-21 domain containing 2	0.239	4.60969	4.84867	0.7625
ENSMUSG00000023912	Slc25a27	solute carrier family 25, member 27	0.1916	5.62186	5.81348	0.7625
ENSMUSG00000060681	Slc9a6	solute carrier family 9 (sodium/hydrogen exchanger...	0.1485	6.44848	6.597	0.7625
ENSMUSG00000014444	Piezo1	piezo-type mechanosensitive ion channel component ...	-0.381	3.63225	3.25128	0.7635
ENSMUSG00000042429	Adora1	adenosine A1 receptor	-0.09448	8.36327	8.26879	0.7635
ENSMUSG00000032269	Htr3a	5-hydroxytryptamine (serotonin) receptor 3A	-0.4203	3.84335	3.42305	0.764
ENSMUSG00000006369	Fbln1	fibulin 1	0.321	3.79896	4.11994	0.764
ENSMUSG00000029101	Rgs12	regulator of G-protein signaling 12	-0.195	5.803	5.60798	0.764
ENSMUSG00000039361	Picalm	phosphatidylinositol binding clathrin assembly pro...	-0.1128	7.24699	7.13422	0.764
ENSMUSG00000047230	Cldn2	claudin 2	0.7822	1.56595	2.34818	0.7646
ENSMUSG00000074872	Ctxn2	cortexin 2	0.4578	2.84084	3.29866	0.7646
ENSMUSG00000030435	U2af2	U2 small nuclear ribonucleoprotein auxiliary facto...	-0.1052	7.36518	7.26	0.7652
ENSMUSG00000009894	Snap47	synaptosomal-associated protein, 47	0.08111	8.3592	8.4403	0.7653
ENSMUSG00000055435	Maf	MAF bZIP transcription factor	-0.2791	4.50891	4.22976	0.7662
ENSMUSG00000034394	Lif	leukemia inhibitory factor	-0.5356	2.02144	1.48581	0.7668
ENSMUSG00000037984	Neurod6	neurogenic differentiation 6	-0.5121	7.23599	6.72392	0.7668
ENSMUSG00000033475	Tomm6	translocase of outer mitochondrial membrane 6	0.1298	6.81074	6.94058	0.7668
ENSMUSG00000063558	Aox1	aldehyde oxidase 1	-0.3248	4.13751	3.81272	0.7682
ENSMUSG00000064105	Cnnm2	cyclin M2	0.2527	4.78006	5.03281	0.7682
ENSMUSG00000069814	Ccdc92b	coiled-coil domain containing 92B	0.2172	5.16792	5.38511	0.7682
ENSMUSG00000038020	Rapgefl1	Rap guanine nucleotide exchange factor (GEF)-like ...	-0.1987	8.08476	7.8861	0.7682
ENSMUSG00000010453	Kansl3	KAT8 regulatory NSL complex subunit 3	0.1344	6.65059	6.78502	0.7682
ENSMUSG00000063646	Jakmip1	janus kinase and microtubule interacting protein 1	0.144	6.35201	6.49602	0.7685
ENSMUSG00000029439	Sfswap	splicing factor SWAP	-0.1211	6.98544	6.8643	0.7685
ENSMUSG00000025221	Kcnip2	Kv channel-interacting protein 2	0.1654	7.35097	7.51634	0.77
ENSMUSG00000024593	Megf10	multiple EGF-like-domains 10	-0.2188	5.00975	4.79096	0.7705
ENSMUSG00000075478	Slitrk1	SLIT and NTRK-like family, member 1	-0.1675	6.05775	5.89023	0.7705
ENSMUSG00000031391	L1cam	L1 cell adhesion molecule	0.1367	7.26321	7.39994	0.7705
ENSMUSG00000010803	Gabra1	gamma-aminobutyric acid type A receptor subunit al...	-0.135	7.62838	7.49336	0.7705
ENSMUSG00000030057	Cnbp	cellular nucleic acid binding protein	-0.08704	7.98083	7.89379	0.7705
ENSMUSG00000030745	Il21r	interleukin 21 receptor	-0.6056	2.45221	1.8466	0.7712
ENSMUSG00000048481	Mypop	Myb-related transcription factor, partner of profi...	0.1899	5.50293	5.69284	0.7715
ENSMUSG00000070034	Sp110	Sp110 nuclear body protein	-0.623	2.50377	1.88074	0.7733
ENSMUSG00000038967	Pdk2	pyruvate dehydrogenase kinase, isoenzyme 2	0.1118	7.24069	7.35249	0.7737
ENSMUSG00000079057	Cyp4v3	cytochrome P450, family 4, subfamily v, polypeptid...	-0.3441	3.96153	3.61745	0.7738
ENSMUSG00000093536	Smim17	small integral membrane protein 17	0.2773	4.00535	4.28264	0.7745
ENSMUSG00000051550	Zfp579	zinc finger protein 579	-0.2356	5.10369	4.86805	0.7745
ENSMUSG00000029231	Pdgfra	platelet derived growth factor receptor, alpha pol...	0.1979	5.40378	5.60172	0.7745
ENSMUSG00000022475	Hdac7	histone deacetylase 7	-0.1744	5.78527	5.61089	0.7745
ENSMUSG00000078584	AU022252	expressed sequence AU022252	0.2084	5.14754	5.35593	0.7752
ENSMUSG00000021262	Evl	Ena-vasodilator stimulated phosphoprotein	0.129	7.06917	7.19814	0.7752
ENSMUSG00000028780	Sema3c	sema domain, immunoglobulin domain (Ig), short bas...	-0.281	4.3987	4.1177	0.7757
ENSMUSG00000038145	Snrk	SNF related kinase	0.1609	6.01126	6.17217	0.776
ENSMUSG00000025932	Eya1	EYA transcriptional coactivator and phosphatase 1	-0.3338	4.08041	3.74659	0.7774
ENSMUSG00000025321	Itgb8	integrin beta 8	-0.2148	5.06074	4.84597	0.7774
ENSMUSG00000093445	Lrch4	leucine-rich repeats and calponin homology (CH) do...	-0.1931	5.70179	5.50874	0.7774
ENSMUSG00000029512	Ulk1	unc-51 like kinase 1	0.1405	6.45078	6.59133	0.7774
ENSMUSG00000032968	Inha	inhibin alpha	0.2603	4.63145	4.89173	0.778
ENSMUSG00000039154	Shd	src homology 2 domain-containing transforming prot...	0.2457	4.28175	4.52743	0.778
ENSMUSG00000054708	Ankrd24	ankyrin repeat domain 24	0.1948	5.76932	5.96408	0.778
ENSMUSG00000033819	Ppp1r16a	protein phosphatase 1, regulatory subunit 16A	0.1513	6.23203	6.38332	0.778
ENSMUSG00000038690	Atp5mf	ATP synthase membrane subunit f	0.1389	6.86013	6.99905	0.778
ENSMUSG00000063576	Klhdc3	kelch domain containing 3	0.1013	7.53695	7.63828	0.778
ENSMUSG00000035545	Leng8	leukocyte receptor cluster (LRC) member 8	-0.09867	8.87775	8.77907	0.778
ENSMUSG00000040390	Map3k10	mitogen-activated protein kinase kinase kinase 10	0.1016	7.54164	7.64326	0.7789
ENSMUSG00000030095	Tmem43	transmembrane protein 43	-0.1914	5.4965	5.30511	0.7794
ENSMUSG00000021102	Glrx5	glutaredoxin 5	0.2308	4.72984	4.96066	0.7796
ENSMUSG00000028416	Bag1	BCL2-associated athanogene 1	0.1318	6.79096	6.9228	0.7796
ENSMUSG00000046159	Chrm3	cholinergic receptor, muscarinic 3, cardiac	-0.2208	5.6633	5.44247	0.7809
ENSMUSG00000096210	H1f0	H1.0 linker histone	-0.1257	6.78306	6.65735	0.7809
ENSMUSG00000037325	Bbs7	Bardet-Biedl syndrome 7	0.2609	4.515	4.77586	0.781
ENSMUSG00000035242	Oaz1	ornithine decarboxylase antizyme 1	0.127	6.84663	6.97367	0.781
ENSMUSG00000036169	Sostdc1	sclerostin domain containing 1	0.7349	2.4252	3.16012	0.7815
ENSMUSG00000069911	Insyn2b	inhibitory synaptic factor family member 2B	0.4624	1.29654	1.75896	0.7815
ENSMUSG00000048721	Fndc9	fibronectin type III domain containing 9	0.4217	1.28536	1.70711	0.7815
ENSMUSG00000073489	Ifi204	interferon activated gene 204	-0.6518	1.72323	1.07145	0.7822
ENSMUSG00000024679	Ms4a6d	membrane-spanning 4-domains, subfamily A, member 6...	-0.4529	1.74857	1.29562	0.7822
ENSMUSG00000032690	Oas2	2'-5' oligoadenylate synthetase 2	-0.4496	1.70823	1.25858	0.7822
ENSMUSG00000093938	Evi2b	ecotropic viral integration site 2b	-0.4337	1.72643	1.29275	0.7822
ENSMUSG00000026928	Card9	caspase recruitment domain family, member 9	-0.3946	2.58009	2.1855	0.7822
ENSMUSG00000048482	Bdnf	brain derived neurotrophic factor	-0.2835	5.14112	4.85762	0.7822
ENSMUSG00000012126	Ubxn11	UBX domain protein 11	0.2699	4.39366	4.66359	0.7822
ENSMUSG00000041548	Hspb8	heat shock protein 8	-0.2583	4.74079	4.48253	0.7822
ENSMUSG00000029470	P2rx4	purinergic receptor P2X, ligand-gated ion channel ...	-0.2569	4.61295	4.35603	0.7822
ENSMUSG00000028988	Ctnnbip1	catenin beta interacting protein 1	0.1809	5.46416	5.64505	0.7822
ENSMUSG00000022193	Psmb5	proteasome (prosome, macropain) subunit, beta type...	-0.1794	6.21131	6.03192	0.7822
ENSMUSG00000030870	Ubfd1	ubiquitin family domain containing 1	0.1736	5.69171	5.86533	0.7822
ENSMUSG00000028565	Nfia	nuclear factor I/A	-0.1733	5.96837	5.79505	0.7822
ENSMUSG00000034163	Zfc3h1	zinc finger, C3H1-type containing	-0.1538	6.12849	5.97465	0.7822
ENSMUSG00000037999	Arap2	ArfGAP with RhoGAP domain, ankyrin repeat and PH d...	-0.1517	6.23676	6.08502	0.7822
ENSMUSG00000067787	Blcap	bladder cancer associated protein	0.1424	6.59655	6.73895	0.7822
ENSMUSG00000029417	Cxcl9	C-X-C motif chemokine ligand 9	-0.1807	0.65402	0.47329	0.7834
ENSMUSG00000043740	Trem6l	triggering receptor expressed on myeloid cells-lik...	-0.1438	0.6036	0.45977	0.7834
ENSMUSG00000006920	Ezh1	enhancer of zeste 1 polycomb repressive complex 2 ...	0.1364	6.52712	6.66354	0.7834
ENSMUSG00000024910	Ctsw	cathepsin W	-0.1201	0.61527	0.49521	0.7834
ENSMUSG00000022586	Ly6i	lymphocyte antigen 6 family member I	-0.04091	0.59772	0.55681	0.7834
ENSMUSG00000063564	Col23a1	collagen, type XXIII, alpha 1	0.4526	3.96105	4.41366	0.7843
ENSMUSG00000043463	Rab9b	RAB9B, member RAS oncogene family	0.2592	4.53058	4.78976	0.7847
ENSMUSG00000001986	Gria3	glutamate receptor, ionotropic, AMPA3 (alpha 3)	-0.1305	7.58965	7.45915	0.7848
ENSMUSG00000037447	Arid5a	AT-rich interaction domain 5A	-0.2921	4.27433	3.9822	0.7865
ENSMUSG00000000197	Nalcn	sodium leak channel, non-selective	0.1619	6.19566	6.35751	0.7888
ENSMUSG00000040111	Gramd1b	GRAM domain containing 1B	-0.08436	8.09351	8.00915	0.7888
ENSMUSG00000046798	Cldn12	claudin 12	0.222	4.8686	5.09062	0.7891
ENSMUSG00000027180	Fbxo3	F-box protein 3	0.1535	5.96662	6.12017	0.7891
ENSMUSG00000034652	Cd300a	CD300A molecule	-0.4538	2.11093	1.65714	0.7896
ENSMUSG00000034947	Tmem106a	transmembrane protein 106A	-0.5568	2.14736	1.5906	0.7901
ENSMUSG00000027828	Ssr3	signal sequence receptor, gamma	-0.1135	6.97442	6.86093	0.7915
ENSMUSG00000022205	Sub1	SUB1 homolog, transcriptional regulator	0.09621	7.67976	7.77596	0.7917
ENSMUSG00000051331	Cacna1c	calcium channel, voltage-dependent, L type, alpha ...	0.1409	6.83508	6.97597	0.7936
ENSMUSG00000027215	Cd82	CD82 antigen	-0.213	5.21721	5.00419	0.7943
ENSMUSG00000071866	Ppia	peptidylprolyl isomerase A	0.1085	8.70784	8.81636	0.7943
ENSMUSG00000044948	Cfap43	cilia and flagella associated protein 43	0.4509	2.56306	3.01395	0.7975
ENSMUSG00000040785	Ttc3	tetratricopeptide repeat domain 3	0.08245	9.62745	9.7099	0.7975
ENSMUSG00000024349	Sting1	stimulator of interferon response cGAMP interactor...	-0.4445	3.08202	2.63754	0.7981
ENSMUSG00000024900	Cpt1a	carnitine palmitoyltransferase 1a, liver	-0.2011	5.42311	5.22197	0.7984
ENSMUSG00000028266	Lmo4	LIM domain only 4	-0.1789	7.16201	6.98315	0.7984
ENSMUSG00000027637	Rab5if	RAB5 interacting factor	0.2382	4.77011	5.00827	0.7986
ENSMUSG00000042532	Golga7b	golgin A7B	0.1555	6.3545	6.50999	0.799
ENSMUSG00000027931	Npr1	natriuretic peptide receptor 1	0.4017	3.01948	3.42113	0.7999
ENSMUSG00000042079	Hnrnpf	heterogeneous nuclear ribonucleoprotein F	-0.196	5.44588	5.24987	0.8002
ENSMUSG00000061808	Ttr	transthyretin	2.055	7.58808	9.64287	0.801
ENSMUSG00000030246	Ldhb	lactate dehydrogenase B	0.1472	8.66804	8.81528	0.801
ENSMUSG00000021981	Cab39l	calcium binding protein 39-like	0.2955	5.09353	5.38904	0.8023
ENSMUSG00000087141	Plcxd2	phosphatidylinositol-specific phospholipase C, X d...	0.2131	4.98897	5.20211	0.8025
ENSMUSG00000031820	Babam1	BRISC and BRCA1 A complex member 1	0.139	6.22383	6.36287	0.8025
ENSMUSG00000022175	Lrp10	low-density lipoprotein receptor-related protein 1...	-0.1924	5.69658	5.50413	0.8032
ENSMUSG00000030216	Wbp11	WW domain binding protein 11	-0.1191	7.07624	6.95711	0.8033
ENSMUSG00000034656	Cacna1a	calcium channel, voltage-dependent, P/Q type, alph...	-0.09848	7.57988	7.4814	0.8035
ENSMUSG00000031458	Coprs	coordinator of PRMT5, differentiation stimulator	0.2573	4.2156	4.47288	0.8044
ENSMUSG00000020863	Luc7l3	LUC7-like 3 (S. cerevisiae)	-0.09374	7.66579	7.57205	0.8052
ENSMUSG00000030222	Rerg	RAS-like, estrogen-regulated, growth-inhibitor	0.2956	4.22152	4.51715	0.8053
ENSMUSG00000026697	Myoc	myocilin	0.4898	4.34368	4.83351	0.8062
ENSMUSG00000031320	Rps4x	ribosomal protein S4, X-linked	-0.1072	7.9654	7.85824	0.8077
ENSMUSG00000052430	Bmpr1b	bone morphogenetic protein receptor, type 1B	-0.2802	4.46143	4.18121	0.8084
ENSMUSG00000040711	Sh3pxd2b	SH3 and PX domains 2B	-0.2305	4.95255	4.72209	0.8086
ENSMUSG00000027803	Wwtr1	WW domain containing transcription regulator 1	-0.3077	4.20001	3.89235	0.8087
ENSMUSG00000015165	Hnrnpl	heterogeneous nuclear ribonucleoprotein L	-0.07747	8.22831	8.15085	0.8087
ENSMUSG00000042903	Foxo4	forkhead box O4	0.2421	4.69328	4.93537	0.8096
ENSMUSG00000021814	Anxa7	annexin A7	-0.1248	6.82664	6.7018	0.8096
ENSMUSG00000022228	Zscan26	zinc finger and SCAN domain containing 26	-0.1194	6.84784	6.72846	0.8127
ENSMUSG00000022956	Atp5po	ATP synthase peripheral stalk subunit OSCP	0.111	7.57899	7.69001	0.8127
ENSMUSG00000025877	Hk3	hexokinase 3	-0.5396	2.276	1.73641	0.8129
ENSMUSG00000070469	Adamtsl3	ADAMTS-like 3	-0.5186	2.26519	1.74656	0.8129
ENSMUSG00000000958	Slc7a7	solute carrier family 7 (cationic amino acid trans...	-0.4538	2.24138	1.78755	0.8129
ENSMUSG00000022548	Apod	apolipoprotein D	-0.3248	8.3497	8.0249	0.8129
ENSMUSG00000021710	Nln	neurolysin (metallopeptidase M3 family)	-0.2211	5.09888	4.87773	0.8129
ENSMUSG00000027714	Exosc9	exosome component 9	-0.2129	5.14219	4.92932	0.8129
ENSMUSG00000052397	Ezr	ezrin	-0.204	6.69273	6.48873	0.8129
ENSMUSG00000037710	Cisd1	CDGSH iron sulfur domain 1	0.1541	5.92964	6.08377	0.8129
ENSMUSG00000040896	Kcnd3	potassium voltage-gated channel, Shal-related fami...	0.1387	6.4574	6.59614	0.8129
ENSMUSG00000005982	Naa60	N(alpha)-acetyltransferase 60, NatF catalytic subu...	0.129	6.66269	6.79169	0.8129
ENSMUSG00000028843	Sh3bgrl3	SH3 domain binding glutamic acid-rich protein-like...	-0.1261	7.11697	6.99091	0.8129
ENSMUSG00000026425	Srgap2	SLIT-ROBO Rho GTPase activating protein 2	-0.1217	6.83951	6.71778	0.8129
ENSMUSG00000027784	Ppm1l	protein phosphatase 1 (formerly 2C)-like	-0.1144	7.06127	6.94689	0.8129
ENSMUSG00000005871	Apc	APC, WNT signaling pathway regulator	-0.09865	7.9496	7.85095	0.8129
ENSMUSG00000003863	Ppfia3	protein tyrosine phosphatase, receptor type, f pol...	0.09571	7.69874	7.79445	0.8129
ENSMUSG00000033006	Sox10	SRY (sex determining region Y)-box 10	-0.1648	6.27224	6.10741	0.8163
ENSMUSG00000035355	Kcnh4	potassium voltage-gated channel, subfamily H (eag-...	0.2613	2.75828	3.01954	0.8174
ENSMUSG00000031026	Trim66	tripartite motif-containing 66	0.2276	4.67566	4.90324	0.8176
ENSMUSG00000024104	Washc2	WASH complex subunit 2	-0.1043	7.23247	7.12814	0.8181
ENSMUSG00000042761	Mrap2	melanocortin 2 receptor accessory protein 2	0.459	2.34365	2.80265	0.8186
ENSMUSG00000038615	Nfe2l1	nuclear factor, erythroid derived 2,-like 1	0.07415	8.45521	8.52936	0.8188
ENSMUSG00000015869	Prpsap1	phosphoribosyl pyrophosphate synthetase-associated...	0.1709	5.56415	5.73509	0.8208
ENSMUSG00000063253	Scoc	short coiled-coil protein	-0.1809	6.3284	6.1475	0.8209
ENSMUSG00000028519	Dab1	disabled 1	-0.1727	6.91288	6.74013	0.8209
ENSMUSG00000040473	Cfap69	cilia and flagella associated protein 69	0.2868	4.19617	4.483	0.8213
ENSMUSG00000052833	Sae1	SUMO1 activating enzyme subunit 1	0.1443	6.37397	6.51826	0.8213
ENSMUSG00000005873	Reep5	receptor accessory protein 5	0.07347	8.55963	8.6331	0.8213
ENSMUSG00000058886	Deaf1	DEAF1, transcription factor	0.1715	5.76869	5.94017	0.8228
ENSMUSG00000033960	Jcad	junctional cadherin 5 associated	0.1474	6.19347	6.34086	0.8228
ENSMUSG00000030102	Itpr1	inositol 1,4,5-trisphosphate receptor 1	0.1613	8.2389	8.40023	0.8229
ENSMUSG00000020611	Gna13	guanine nucleotide binding protein, alpha 13	-0.1421	6.08797	5.94592	0.8229
ENSMUSG00000022680	Pdxdc1	pyridoxal-dependent decarboxylase domain containin...	0.1303	6.74174	6.872	0.8229
ENSMUSG00000069670	Nkain2	Na+/K+ transporting ATPase interacting 2	0.1909	5.30435	5.49527	0.8231
ENSMUSG00000054452	Tle5	TLE family member 5, transcriptional modulator	0.1015	9.03784	9.13936	0.8243
ENSMUSG00000043131	Mob1a	MOB kinase activator 1A	-0.2283	4.95266	4.72433	0.8247
ENSMUSG00000044734	Serpinb1a	serine (or cysteine) peptidase inhibitor, clade B,...	0.3629	3.05941	3.42235	0.8257
ENSMUSG00000057315	Arhgap24	Rho GTPase activating protein 24	0.3243	3.05002	3.37434	0.8257
ENSMUSG00000025905	Oprk1	opioid receptor, kappa 1	0.4197	1.42702	1.84674	0.8266
ENSMUSG00000034243	Golgb1	golgin B1	-0.09743	7.55794	7.46051	0.8283
ENSMUSG00000023010	Tmbim6	transmembrane BAX inhibitor motif containing 6	-0.08827	8.79129	8.70302	0.8294
ENSMUSG00000038094	Atp13a4	ATPase type 13A4	-0.254	4.63426	4.38028	0.8311
ENSMUSG00000031284	Pak3	p21 (RAC1) activated kinase 3	0.1369	6.34993	6.48685	0.8311
ENSMUSG00000021756	Il6st	interleukin 6 signal transducer	-0.1358	6.55009	6.41425	0.8311
ENSMUSG00000022246	Rai14	retinoic acid induced 14	-0.305	3.87821	3.57323	0.8326
ENSMUSG00000026141	Col19a1	collagen, type XIX, alpha 1	-0.3038	4.37201	4.0682	0.8326
ENSMUSG00000003948	Mmd	monocyte to macrophage differentiation-associated	-0.219	8.13652	7.91748	0.8326
ENSMUSG00000021549	Rasa1	RAS p21 protein activator 1	-0.1848	5.7115	5.52667	0.8326
ENSMUSG00000045671	Spred2	sprouty-related EVH1 domain containing 2	-0.1552	6.67246	6.51724	0.8326
ENSMUSG00000051223	Bzw1	basic leucine zipper and W2 domains 1	-0.1114	7.09705	6.98567	0.8326
ENSMUSG00000072845	Tmprss11a	transmembrane protease, serine 11a	0.1014	0.53121	0.63261	0.8326
ENSMUSG00000001833	Septin7	septin 7	-0.09428	8.18404	8.08976	0.8326
ENSMUSG00000063146	Clip2	CAP-GLY domain containing linker protein 2	-0.09304	7.65879	7.56575	0.8326
ENSMUSG00000023122	Sult1c2	sulfotransferase family, cytosolic, 1C, member 2	0.068	0.55579	0.6238	0.8326
ENSMUSG00000021118	Plek2	pleckstrin 2	0.06429	0.5457	0.60999	0.8326
ENSMUSG00000021187	Tc2n	tandem C2 domains, nuclear	0.06422	0.58029	0.64451	0.8326
ENSMUSG00000074006	Omp	olfactory marker protein	0.04449	0.55165	0.59613	0.8326
ENSMUSG00000096887	Mtrnr2l7	mt-Rnr2 like 7	0.02465	0.56437	0.58902	0.8326
ENSMUSG00000090121	Abhd12b	abhydrolase domain containing 12B	0.3886	0.50245	0.89108	0.834
ENSMUSG00000030748	Il4ra	interleukin 4 receptor, alpha	-0.3865	3.30996	2.92344	0.834
ENSMUSG00000061119	Prcp	prolylcarboxypeptidase (angiotensinase C)	-0.3839	3.64411	3.26019	0.834
ENSMUSG00000005640	Insrr	insulin receptor-related receptor	0.1377	0.50276	0.64049	0.834
ENSMUSG00000100916	Lhb	luteinizing hormone beta	0.09101	0.52151	0.61253	0.834
ENSMUSG00000093904	Tomm20	translocase of outer mitochondrial membrane 20	0.08476	8.00984	8.09459	0.8343
ENSMUSG00000024213	Nudt3	nudix hydrolase 3	-0.0778	8.18712	8.10931	0.8343
ENSMUSG00000019359	Gdpd2	glycerophosphodiester phosphodiesterase domain con...	-0.2908	4.3341	4.04327	0.8346
ENSMUSG00000037386	Rims2	regulating synaptic membrane exocytosis 2	0.1902	5.51981	5.71004	0.8351
ENSMUSG00000032036	Kirrel3	kirre like nephrin family adhesion molecule 3	0.1737	5.75358	5.92729	0.8351
ENSMUSG00000039501	Znfx1	zinc finger, NFX1-type containing 1	-0.1448	6.15579	6.01095	0.8351
ENSMUSG00000003346	Abhd17a	abhydrolase domain containing 17A	0.1396	6.45051	6.59015	0.8351
ENSMUSG00000045128	Rpl18a	ribosomal protein L18A	-0.1126	7.65034	7.53775	0.8351
ENSMUSG00000045994	B3gat1	beta-1,3-glucuronyltransferase 1	0.07958	8.27638	8.35596	0.8351
ENSMUSG00000026156	B3gat2	beta-1,3-glucuronyltransferase 2	0.2633	4.2036	4.46693	0.838
ENSMUSG00000003746	Man1a	mannosidase 1, alpha	-0.2106	5.57488	5.36426	0.8391
ENSMUSG00000016427	Ndufa1	NADH:ubiquinone oxidoreductase subunit A1	0.1755	5.64019	5.81567	0.8391
ENSMUSG00000020326	Ccng1	cyclin G1	-0.1475	6.2671	6.11964	0.8391
ENSMUSG00000070493	Chchd2	coiled-coil-helix-coiled-coil-helix domain contain...	0.1258	6.9984	7.12419	0.8391
ENSMUSG00000047013	Fbxo41	F-box protein 41	0.1105	7.00889	7.1194	0.8391
ENSMUSG00000024359	Hspa9	heat shock protein 9	-0.08199	8.02661	7.94462	0.8392
ENSMUSG00000071715	Ncf4	neutrophil cytosolic factor 4	-0.595	1.95695	1.36196	0.8397
ENSMUSG00000070031	Sp140	Sp140 nuclear body protein	-0.3305	1.53116	1.20062	0.8398
ENSMUSG00000007987	Ift22	intraflagellar transport 22	0.2085	4.95945	5.16793	0.8398
ENSMUSG00000035992	Fnip1	folliculin interacting protein 1	-0.1918	5.43934	5.24752	0.8398
ENSMUSG00000040430	Pitpnc1	phosphatidylinositol transfer protein, cytoplasmic...	0.1435	6.18818	6.33169	0.8398
ENSMUSG00000029763	Exoc4	exocyst complex component 4	-0.1398	6.37987	6.2401	0.8398
ENSMUSG00000035936	Aldh5a1	aldhehyde dehydrogenase family 5, subfamily A1	0.1266	6.69933	6.82595	0.8398
ENSMUSG00000029598	Plbd2	phospholipase B domain containing 2	-0.1151	6.83117	6.71611	0.8398
ENSMUSG00000003518	Dusp3	dual specificity phosphatase 3 (vaccinia virus pho...	-0.09134	7.59873	7.50739	0.8398
ENSMUSG00000030701	Plekhb1	pleckstrin homology domain containing, family B (e...	0.1962	9.08748	9.28363	0.84
ENSMUSG00000052305	Hbb-b1	hemoglobin, beta adult major chain	0.6184	2.67287	3.29128	0.8404
ENSMUSG00000028081	Rps3a1	ribosomal protein S3A1	0.1618	7.90054	8.06231	0.8404
ENSMUSG00000001729	Akt1	thymoma viral proto-oncogene 1	0.09776	7.54368	7.64144	0.8419
ENSMUSG00000066406	Akap13	A kinase anchor protein 13	-0.1892	6.76593	6.5767	0.8422
ENSMUSG00000023267	Gabrr2	gamma-aminobutyric acid type A receptor subunit rh...	0.2684	1.24122	1.50962	0.8429
ENSMUSG00000035621	Midn	midnolin	-0.1445	6.19711	6.05262	0.8429
ENSMUSG00000022377	Asap1	ArfGAP with SH3 domain, ankyrin repeat and PH doma...	-0.1411	6.71429	6.57316	0.8434
ENSMUSG00000028358	Zfp618	zinc finger protein 618	0.43	2.61088	3.04084	0.8438
ENSMUSG00000026389	Steap3	STEAP family member 3	-0.3725	3.56853	3.19603	0.8438
ENSMUSG00000019590	Cyb561	cytochrome b-561	0.1845	5.78111	5.96562	0.8447
ENSMUSG00000025035	Arl3	ADP-ribosylation factor-like 3	0.1302	6.45739	6.58761	0.8458
ENSMUSG00000052560	Cpne8	copine VIII	-0.2663	4.76177	4.49551	0.8461
ENSMUSG00000028393	Alad	aminolevulinate, delta-, dehydratase	0.2251	4.77591	5.00105	0.8463
ENSMUSG00000029861	Fam131b	family with sequence similarity 131, member B	0.1194	6.83222	6.95165	0.8463
ENSMUSG00000019505	Ubb	ubiquitin B	-0.08444	9.13228	9.04784	0.8463
ENSMUSG00000057143	Trim12c	tripartite motif-containing 12C	-0.4471	2.73223	2.28513	0.8464
ENSMUSG00000041143	Tmco4	transmembrane and coiled-coil domains 4	-0.4061	3.03439	2.62825	0.8464
ENSMUSG00000032434	Cmtm6	CKLF-like MARVEL transmembrane domain containing 6	-0.2231	4.89523	4.67209	0.8464
ENSMUSG00000032878	Ccdc85a	coiled-coil domain containing 85A	0.17	5.73682	5.90681	0.8464
ENSMUSG00000003429	Rps11	ribosomal protein S11	-0.1241	7.67748	7.55343	0.8464
ENSMUSG00000028936	Rpl22	ribosomal protein L22	-0.1135	6.90138	6.78784	0.8464
ENSMUSG00000051497	Kcnj16	potassium inwardly-rectifying channel, subfamily J...	0.231	4.46439	4.69536	0.8467
ENSMUSG00000027342	Pcna	proliferating cell nuclear antigen	-0.2033	5.2086	5.00531	0.8469
ENSMUSG00000020573	Pik3cg	phosphatidylinositol-4,5-bisphosphate 3-kinase cat...	-0.3803	2.77693	2.39664	0.847
ENSMUSG00000020231	Dip2a	disco interacting protein 2 homolog A	-0.1312	6.61583	6.48461	0.847
ENSMUSG00000036334	Igsf10	immunoglobulin superfamily, member 10	-0.4181	2.87338	2.45523	0.8471
ENSMUSG00000022575	Gsdmd	gasdermin D	-0.4668	2.80828	2.34147	0.849
ENSMUSG00000031613	Hpgd	hydroxyprostaglandin dehydrogenase 15 (NAD)	-0.403	2.84527	2.44223	0.8492
ENSMUSG00000046410	Kcnk6	potassium inwardly-rectifying channel, subfamily K...	-0.3897	2.84284	2.45312	0.8492
ENSMUSG00000024981	Acsl5	acyl-CoA synthetase long-chain family member 5	-0.1544	6.24987	6.09549	0.8497
ENSMUSG00000037032	Apbb1	amyloid beta precursor protein binding family B me...	0.0727	8.6179	8.6906	0.8497
ENSMUSG00000044349	Snhg11	small nucleolar RNA host gene 11	0.1786	11.0698	11.2484	0.8503
ENSMUSG00000023571	C1qtnf12	C1q and tumor necrosis factor related 12	0.3683	3.19805	3.56636	0.8508
ENSMUSG00000032112	Trappc4	trafficking protein particle complex 4	0.188	5.19343	5.38145	0.851
ENSMUSG00000005674	Tomm40l	translocase of outer mitochondrial membrane 40-lik...	0.1464	6.0995	6.24593	0.8512
ENSMUSG00000031903	Pla2g15	phospholipase A2, group XV	-0.2149	5.17598	4.96113	0.8519
[truncated: 15,878 more rows]

## Sheet: Hipp.Bulk_WGCNA
Hippocampus bulk-RNA-seq - WGCNA modules, related to Fig. 3c,d
nodeName	WGCNA-Modules
Ins2	black
Fap	black
Acp5	black
Slc19a1	black
Tat	black
Marveld3	black
Folr1	black
Pon1	black
Crhr2	black
Inmt	black
Angptl2	black
Aqp1	black
Dnah2	black
Prlr	black
Tuft1	black
Pdc	black
5430419D17Rik	black
Krt23	black
Stambp	black
Gnat2	black
Trpm5	black
Slc16a12	black
Ehf	black
Trpv4	black
Ceacam16	black
Clic3	black
Tmem27	black
Steap1	black
Steap2	black
Chdh	black
Lbp	black
Sulf1	black
Cd300lg	black
Tns4	black
Wfdc2	black
Dpep1	black
Frk	black
Hey2	black
Perp	black
Lrriq1	black
Wdpcp	black
Ace	black
Llgl2	black
Gsc	black
Plek2	black
Tc2n	black
Serpinb9b	black
Slc28a3	black
Ocln	black
Elovl7	black
Emb	black
Acox2	black
Gpx8	black
BC067074	black
Nid2	black
Cab39l	black
Scara5	black
Dct	black
Dnajc3	black
Dab2	black
Col14a1	black
Enpp2	black
Cldn1	black
Spag6	black
Clic6	black
Krt18	black
Mospd1	black
Gm853	black
Sult1c2	black
Serinc2	black
Bmp15	black
Zscan10	black
Sult1c1	black
Rsph9	black
Arhgap28	black
Sbp	black
Slc12a2	black
Fads3	black
Ms4a8a	black
Slc22a19	black
Lgals12	black
Efhc2	black
Col17a1	black
Loxl4	black
Limd1	black
Fscn2	black
Odf3	black
Cox8b	black
Lmntd2	black
Rdh10	black
1500015O10Rik	black
Klhl30	black
Cd55	black
F5	black
Lmx1a	black
Itgb6	black
Stk39	black
Prrg4	black
Nphp1	black
Col9a3	black
Slc16a4	black
Rrh	black
Sh3d19	black
Abca4	black
5830415F09Rik	black
Tspan1	black
Pomgnt1	black
Hspg2	black
Slc4a2	black
Morn1	black
Gatc	black
Pon3	black
Fkbp9	black
Slc13a4	black
Fam115c	black
Slco1c1	black
Rassf8	black
Oca2	black
Iqgap1	black
Arl6ip1	black
Myo7a	black
Cpxm2	black
Scnn1b	black
Vwa3a	black
Magix	black
Glt28d2	black
Rs1	black
Zfp185	black
Rab11fip1	black
Sfrp1	black
Drc7	black
Ces2e	black
Acad8	black
Pdgfd	black
Cgnl1	black
Stoml1	black
Loxl1	black
Ooep	black
Folr2	black
Slc16a8	black
Phldb2	black
Ptprf	black
Arhgef5	black
Clcnka	black
Zbbx	black
2310007B03Rik	black
Loxl2	black
Mfsd7c	black
Tmem30b	black
Slc24a1	black
Pof1b	black
Mfrp	black
Tjp3	black
Wdr78	black
Slc24a5	black
Galm	black
Caps2	black
Acss3	black
Mbnl3	black
Sostdc1	black
Slc18a1	black
Glb1l2	black
Tmem184a	black
Prr32	black
Slc2a12	black
Cdkn1c	black
Slc16a9	black
Tmem237	black
Baiap2l1	black
Fam117a	black
Bmp6	black
Sptlc3	black
Igfbp2	black
Prdm16	black
Nt5dc1	black
Rsph4a	black
Vasn	black
Kcne2	black
Capsl	black
Tbc1d2	black
4932438H23Rik	black
Thbs1	black
Btnl9	black
Gyltl1b	black
Il25	black
Agbl2	black
Kcnk18	black
Ulk4	black
Fzd7	black
Pla2g5	black
Htr2c	black
Mdfic	black
Pcca	black
Sytl3	black
Acacb	black
Dmgdh	black
Bhmt2	black
Slc5a10	black
Dmrt3	black
Il17re	black
Tuba1c	black
Olfr1342	black
1700048O20Rik	black
Slc35g1	black
Crb3	black
Dsg2	black
Klhl31	black
Wdr72	black
Defb11	black
Tcf21	black
Olfr574	black
Iqub	black
Gjb4	black
Ppp1r3b	black
Fam187b	black
Msgn1	black
D030056L22Rik	black
Cldn2	black
Defb9	black
Tmem72	black
Msx1	black
Cxcr1	black
Igf2	black
Myof	black
Krt8	black
Fam161a	black
Ces2b	black
F2rl3	black
Sgms2	black
Gprc5c	black
Map3k19	black
Mest	black
D630039A03Rik	black
Pmp2	black
Syne3	black
9130008F23Rik	black
Wdr86	black
Ghr	black
Cndp1	black
Col8a2	black
Gm10000	black
Cep162	black
Olfr1508	black
Lepr	black
Sema3b	black
Kl	black
Frem1	black
Vpreb1	black
Olfr1507	black
Kif27	black
Dppa5a	black
Cdh3	black
Ttr	black
Rufy4	black
Tnfaip8	black
Zfp512	black
Phactr2	black
Slc39a4	black
Slco1a5	black
Slc31a1	black
Serpina1a	black
Cldn9	black
Col4a4	black
Col8a1	black
Slc4a5	black
Tlx2	black
Cldn3	black
Ren1	black
Rbm47	black
Acnat1	black
Serpina1d	black
Tmem139	black
Cfap44	black
Mansc4	black
Tmprss11a	black
Fam46d	black
Gm7173	black
Gm6471	black
Olfr570	black
Ntf5	black
Spint2	black
Wfdc6a	black
Bhmt	black
Ankef1	black
Itpripl1	black
Smim6	black
Ankrd65	black
Tgtp1	black
R3hdml	black
C86695	black
Ackr4	black
Kcnj13	black
Col4a3	black
Gm1110	black
Esrp2	black
Tmem102	black
Gm8251	black
Gm21973	black
Smim22	black
Sowahc	black
Narf	blue
Tbx2	blue
Slc22a18	blue
Slfn4	blue
Tspan32	blue
Trim25	blue
Scpep1	blue
Itgb2	blue
Tpd52l1	blue
Dazap2	blue
Mx1	blue
Gpa33	blue
Adora3	blue
Sox9	blue
Gm2a	blue
Hk2	blue
Haao	blue
Cd52	blue
Loxl3	blue
Dnmt3l	blue
Serpinf1	blue
Kcnn3	blue
Mmp11	blue
Vpreb3	blue
Slc7a7	blue
Ccl3	blue
S100a4	blue
S100a3	blue
S100a6	blue
Slc13a2	blue
Lgals9	blue
Timp1	blue
Mxd1	blue
Oas1c	blue
Uhrf1	blue
Gabrg1	blue
Itgb7	blue
Sync	blue
Ube2c	blue
Glmp	blue
Tbx21	blue
Cyp51	blue
Tubb6	blue
Def8	blue
Sgca	blue
Foxm1	blue
Fkbp10	blue
Acap1	blue
Tcirg1	blue
Naglu	blue
Tspan33	blue
Rin2	blue
Slc1a5	blue
Pdzd4	blue
Pnck	blue
Cd3g	blue
Bbc3	blue
Nr1h3	blue
Spi1	blue
Stat6	blue
Tead3	blue
Def6	blue
Lmf1	blue
Irf9	blue
Dhrs1	blue
Snx9	blue
Dyrk1b	blue
Rgs20	blue
Axl	blue
Tgfb1	blue
Dennd1c	blue
Lcp2	blue
Jag2	blue
Mcm2	blue
Il17ra	blue
Clptm1	blue
Relb	blue
Apoe	blue
Apoc2	blue
Ap1m1	blue
Bcl2l12	blue
Ebi3	blue
Hck	blue
St8sia6	blue
Ncstn	blue
Pex19	blue
Cyp4f18	blue
Ddr1	blue
Rps6ka1	blue
Kif20a	blue
Dnase2a	blue
Nqo1	blue
Hlf	blue
Ssbp2	blue
Stat3	blue
Stat5a	blue
Map3k11	blue
Kifc2	blue
Psap	blue
Ptpn6	blue
Lpcat3	blue
Il12b	blue
Ralb	blue
Tbccd1	blue
Ctse	blue
Arhgef18	blue
Cd33	blue
Nkg7	blue
Ly9	blue
Cd244	blue
Emr1	blue
Grap	blue
Srpk1	blue
Nes	blue
Dtx2	blue
Hnrnpa2b1	blue
Sgsh	blue
Jkamp	blue
Cd44	blue
Man2b1	blue
Shbg	blue
Spc25	blue
Fgfr4	blue
Mlxipl	blue
Mcm5	blue
Hmox1	blue
Asf1b	blue
Tmod4	blue
Ampd3	blue
Mmp8	blue
Sqrdl	blue
Metap1	blue
Tnfsf14	blue
Otx1	blue
Kctd20	blue
Ctns	blue
Shpk	blue
Trpv1	blue
Inpp5k	blue
Upk3bl	blue
Fblim1	blue
Tep1	blue
Ggt5	blue
Ggt1	blue
Pgrmc1	blue
Cdc20	blue
Pvrl4	blue
Bbs1	blue
Ptbp1	blue
Mvd	blue
Cyba	blue
Hfe	blue
Pknox1	blue
Tph2	blue
Ttc25	blue
Hap1	blue
Syngr3	blue
Vars	blue
Msh5	blue
Ddah2	blue
Clic1	blue
Pole	blue
Dennd2c	blue
Gatad1	blue
M6pr	blue
Fance	blue
Cav1	blue
Id3	blue
Ctsd	blue
Phox2a	blue
Fgfrl1	blue
Clstn3	blue
Fnbp4	blue
Snrpb2	blue
Elk3	blue
Pou2f2	blue
Mgst1	blue
Ubqln4	blue
Tmem184b	blue
Dqx1	blue
Tmem8c	blue
Pttg1ip	blue
Lpo	blue
Apobec3	blue
Oit3	blue
Tex11	blue
Tfcp2	blue
Nuak2	blue
Kif19a	blue
Slc38a3	blue
Slc3a2	blue
Tnfrsf13b	blue
Tmem86a	blue
Ifi35	blue
Myt1	blue
Gm266	blue
Fads1	blue
Mcoln2	blue
Evi5l	blue
Gltp	blue
Bnip2	blue
Steap4	blue
Kif11	blue
Mlkl	blue
Podnl1	blue
4933405L10Rik	blue
Tnfaip8l2	blue
Ly6g6e	blue
Rnf170	blue
Mcemp1	blue
Ube2z	blue
Pkd2l2	blue
Csf1	blue
Fam120b	blue
Dll1	blue
Fhod1	blue
Elmo3	blue
Stc1	blue
Entpd2	blue
Lrrk1	blue
Aldh1a3	blue
Sirt2	blue
Abca1	blue
Gdi1	blue
Gadd45b	blue
Slamf6	blue
Cybb	blue
Cd48	blue
Fam163a	blue
Atp6v0e	blue
Lama5	blue
Prune	blue
Vps45	blue
Aph1a	blue
Nfe2l2	blue
Fcrls	blue
Cd5l	blue
Fam184b	blue
Ncapg	blue
Gatsl2	blue
Fcgr1	blue
Ncf1	blue
Adss	blue
Fli1	blue
Camk1g	blue
H2-M3	blue
Ctsz	blue
H2-M2	blue
Col20a1	blue
Plgrkt	blue
Cd274	blue
Il19	blue
Mapkapk2	blue
Bik	blue
Kctd5	blue
Matn4	blue
Sdc4	blue
Il13ra1	blue
Traf4	blue
Nek8	blue
Psmd11	blue
Crlf3	blue
Cd40	blue
Wsb1	blue
Ttpal	blue
Rhbdl3	blue
Birc5	blue
Slc12a5	blue
Pltp	blue
Slc12a7	blue
Ctsa	blue
Slc12a4	blue
Dhx58	blue
Cyth4	blue
Cyb5r3	blue
Mafk	blue
Ikzf3	blue
Mfng	blue
Il12rb2	blue
Abi3	blue
Adora2b	blue
Ikzf1	blue
Cpsf4l	blue
Ndel1	blue
Cd68	blue
Irf1	blue
Slc22a5	blue
Csf2	blue
Cxcl16	blue
Alox15	blue
Heatr9	blue
Ccl6	blue
Ccl4	blue
Nars2	blue
Plod1	blue
Dnase1l1	blue
Ccl9	blue
Cacng2	blue
Rab5c	blue
Nop9	blue
Sec14l4	blue
Trip10	blue
Cd70	blue
Slc6a8	blue
Pcmt1	blue
Mical1	blue
Rab32	blue
Traf3ip2	blue
Nmbr	blue
Ccdc59	blue
2025-09-10	blue
Zwint	blue
Dcn	blue
Cdk1	blue
Rhobtb1	blue
Poc1b	blue
Ikbip	blue
Epb4.1l2	blue
Ahi1	blue
Enpp3	blue
Pde7b	blue
Mtfr2	blue
Ifngr1	blue
Hal	blue
Ntn4	blue
Cep83	blue
Rfx4	blue
Ascl1	blue
Dram1	blue
Pbld1	blue
Srgn	blue
Npffr1	blue
Pald1	blue
Sgpl1	blue
Slc29a3	blue
4632428N05Rik	blue
Plek	blue
Apc2	blue
Slc1a4	blue
Dock2	blue
Mdm2	blue
Aldh1l2	blue
Wdr82	blue
Appl2	blue
Lyrm7	blue
Stk10	blue
Rhbdf1	blue
Nprl3	blue
Madcam1	blue
Slc22a4	blue
Mgat1	blue
Gfpt2	blue
Ltc4s	blue
Pdlim4	blue
Med7	blue
Havcr2	blue
Upp1	blue
Hormad2	blue
Tns3	blue
Gatsl3	blue
Igfbp3	blue
Tcn2	blue
Myo1g	blue
Efemp1	blue
Aebp1	blue
Polm	blue
Ccdc117	blue
2810021J22Rik	blue
Prr11	blue
Srebf1	blue
Pctp	blue
Atp6v1c2	blue
Pik3cg	blue
Laptm4a	blue
Hs1bp3	blue
Cmpk2	blue
Rsad2	blue
Id2	blue
Rrm2	blue
Cenpo	blue
Taf15	blue
Itgb3	blue
5530401A14Rik	blue
Rnf135	blue
Adap2	blue
Grin2c	blue
Unk	blue
Trim47	blue
Spns3	blue
Ube2o	blue
Rhbdf2	blue
Fam64a	blue
Mfsd11	blue
Slc46a1	blue
Nxn	blue
Abcc3	blue
Aurkb	blue
Pik3r5	blue
Ntn1	blue
Top2a	blue
Acly	blue
Gfap	blue
Map3k14	blue
Cdkl1	blue
Ptpn21	blue
Serpina3n	blue
Dhrs7	blue
Ppm1a	blue
Pigh	blue
Zfp36l1	blue
Srsf5	blue
Fbln5	blue
Lgmn	blue
Net1	blue
Npc2	blue
Fos	blue
Zfp839	blue
Fdft1	blue
Tnfaip2	blue
Gpr132	blue
Gpr137b	blue
Sfrp4	blue
Aoah	blue
Susd3	blue
Ogn	blue
Wrnip1	blue
Ripk1	blue
Ly86	blue
Gadd45g	blue
Syk	blue
Msx2	blue
Sfxn1	blue
Ctsl	blue
Fastkd3	blue
Trpc7	blue
Nkd2	blue
Sdha	blue
Spata9	blue
Lpcat1	blue
Tert	blue
Xrcc4	blue
Cd180	blue
Hexb	blue
Depdc1b	blue
Thbs4	blue
4930452B06Rik	blue
Fst	blue
Cdhr1	blue
Plau	blue
Pnp	blue
Rnase4	blue
Rnase6	blue
Gpr65	blue
Btd	blue
Galnt15	blue
Itih4	blue
Ctsb	blue
Gdf10	blue
Sap18	blue
Lcp1	blue
Epsti1	blue
Tnfsf11	blue
Wbp4	blue
Elp3	blue
Pbk	blue
Clu	blue
Adam2	blue
Sorbs3	blue
Slc39a14	blue
Itm2b	blue
Spry2	blue
Cln5	blue
Irg1	blue
Osmr	blue
Fyb	blue
Ttc33	blue
Lrp10	blue
Ajuba	blue
Drosha	blue
Slc22a17	blue
Efs	blue
Sub1	blue
Fitm1	blue
Tgm1	blue
Ripk3	blue
Ropn1l	blue
Rai14	blue
Dnah5	blue
Pabpc1	blue
Atp6v1c1	blue
Myc	blue
Sqle	blue
Klhl38	blue
Has2	blue
Gtse1	blue
Ttll8	blue
Tef	blue
Zc3h7b	blue
Rangap1	blue
Cacna1i	blue
Dscc1	blue
Twf1	blue
Naga	blue
Slc38a4	blue
Endou	blue
Rapgef3	blue
Nckap1l	blue
Glycam1	blue
Shisa9	blue
Txndc11	blue
Ciita	blue
Zfp263	blue
Fam86	blue
Ercc4	blue
Slc52a2	blue
Oplah	blue
Naprt	blue
Gsdmd	blue
Ly6i	blue
Lmf2	blue
Tymp	blue
Cd96	blue
Cd200	blue
Cd200r1	blue
Boc	blue
Dgcr8	blue
Igsf11	blue
Tnk2	blue
Itgb5	blue
Hcls1	blue
Ehhadh	blue
Senp2	blue
Samsn1	blue
Eif4a2	blue
St6gal1	blue
Masp1	blue
Slc15a2	blue
Cd86	blue
Parp9	blue
Pros1	blue
Chaf1b	blue
Runx1	blue
Il10rb	blue
Ifnar2	blue
Krt75	blue
Lalba	blue
Fmnl3	blue
Faim2	blue
Atf1	blue
Cela1	blue
Csad	blue
Soat2	blue
Cdkn1a	blue
Cxcl13	blue
Prmt5	blue
Nagpa	blue
Wrb	blue
Rpp14	blue
Bsg	blue
Serping1	blue
Guca2a	blue
Parp3	blue
Trip6	blue
Tmem176a	blue
Slc17a9	blue
Pisd	blue
Cdca3	blue
Fam132a	blue
Iqcf3	blue
Rps6ka2	blue
Slc22a1	blue
Thbs2	blue
Tnfrsf12a	blue
Pla2g7	blue
Sgol1	blue
Nfkbie	blue
Guca1a	blue
Trem2	blue
Treml1	blue
Fgd2	blue
Pim1	blue
Glp1r	blue
Myl12a	blue
Cyp4f13	blue
Ndc80	blue
Lbh	blue
Galnt14	blue
Eif2ak2	blue
Ralbp1	blue
Prss30	blue
Cript	blue
C3	blue
Hn1l	blue
Pdia2	blue
Rfx2	blue
Ip6k3	blue
Snrpc	blue
Map3k8	blue
Syt4	blue
Cyp4f14	blue
Myo1f	blue
Tapbp	blue
Wdr46	blue
Col11a2	blue
H2-Oa	blue
Psmb8	blue
Tap2	blue
Btnl2	blue
Psd2	blue
Tmem173	blue
Hspa9	blue
Stard4	blue
Aif1	blue
Ltb	blue
Tnf	blue
Lta	blue
Psors1c2	blue
Aqp4	blue
Spry4	blue
Arap3	blue
Gabbr1	blue
4833403I15Rik	blue
Hsd17b4	blue
Mbd2	blue
Rax	blue
Pmaip1	blue
Lox	blue
Snx24	blue
Sall3	blue
Isoc1	blue
Cd74	blue
Tcof1	blue
Csf1r	blue
Rab3il1	blue
Cd5	blue
Ms4a7	blue
Ms4a4c	blue
Ms4a6b	blue
Ms4a6d	blue
Fam111a	blue
Lpxn	blue
Gna14	blue
Ostf1	blue
Ccdc86	blue
Slc15a3	blue
Pga5	blue
Stambpl1	blue
Fas	blue
Lipa	blue
Cdca5	blue
Rpp30	blue
Mlana	blue
Frmd8	blue
Slc25a45	blue
Pola2	blue
Chka	blue
Pitpnm1	blue
Adrbk1	blue
Acy3	blue
Aldh3b1	blue
Cpt1a	blue
Peli3	blue
Efemp2	blue
Ctsw	blue
Fosl1	blue
Rela	blue
Kcnk4	blue
Plcb3	blue
Fermt3	blue
Tectb	blue
Hhex	blue
Cyp26a1	blue
Plce1	blue
Tctn3	blue
Pik3ap1	blue
Smndc1	blue
Nt5c2	blue
Msr1	blue
5430427O19Rik	blue
Casp7	blue
Afap1l2	blue
Ppp1r27	blue
P4hb	blue
Arhgap19	blue
Mms19	blue
Hoga1	blue
Nfkb2	blue
Hexa	blue
Tsr2	blue
Fgd1	blue
Tro	blue
Sat1	blue
Padi3	blue
Padi4	blue
Gpr143	blue
Rdh5	blue
Cd63	blue
Ormdl2	blue
Mmp19	blue
Dgka	blue
Cdk2	blue
Rnf41	blue
Shmt2	blue
Atp5a1	blue
Paox	blue
Msx3	blue
Ifitm3	blue
Irf7	blue
Pidd1	blue
Cd151	blue
Tspan4	blue
Apool	blue
Gusb	blue
Phkg1	blue
Farp1	blue
Slc15a1	blue
Tk1	blue
Gaa	blue
Nat1	blue
Usp16	blue
Gm7628	blue
Atrip	blue
Shisa5	blue
Pfkfb4	blue
Tmem89	blue
Alox5	blue
A930017K11Rik	blue
Hadha	blue
Ly96	blue
Zdhhc3	blue
St8sia2	blue
Ccr1	blue
Pard3	blue
Pdia4	blue
Heatr2	blue
Hk3	blue
Smad7	blue
Casp12	blue
Casp1	blue
Tmem70	blue
Acadl	blue
Icos	blue
Ica1l	blue
Stradb	blue
Trak2	blue
Casp8	blue
Sgol2	blue
Khdrbs2	blue
Il18rap	blue
Il1rl1	blue
Il18r1	blue
Map4k4	blue
Mitd1	blue
Stat1	blue
Sema4c	blue
Plekhb2	blue
Ptpn18	blue
B3gat2	blue
Ogfrl1	blue
Plcd4	blue
Rqcd1	blue
Ctdsp1	blue
Slc11a1	blue
Pnkd	blue
Igfbp5	blue
Tmem169	blue
Pecr	blue
Atic	blue
Bard1	blue
Glb1l	blue
Sp100	blue
Spata3	blue
2810459M11Rik	blue
Htr2b	blue
Ptma	blue
Gpr35	blue
2025-09-02	blue
Atg4b	blue
Pdcd1	blue
Inpp5d	blue
Mlph	blue
Cln8	blue
Rgs1	blue
Sctr	blue
Steap3	blue
Ptprc	blue
Gpr37l1	blue
Eif2d	blue
Rab29	blue
Elk4	blue
Cyb5r1	blue
Adipor1	blue
Mr1	blue
Ncf2	blue
Fam129a	blue
Trp53bp2	blue
Mnda	blue
Tagln2	blue
Slamf9	blue
Mpzl1	blue
Xcl1	blue
Sell	blue
Axdnd1	blue
Cenpf	blue
Kctd3	blue
Slc30a10	blue
Bpnt1	blue
Ppp2r5a	blue
Tmem206	blue
Atf3	blue
Batf3	blue
Tatdn3	blue
Angel2	blue
Traf5	blue
Suv39h2	blue
Fcgr2b	blue
Ucma	blue
Nuf2	blue
Prdx6	blue
Rsu1	blue
Vim	blue
Pter	blue
Plxdc2	blue
Apbb1ip	blue
Fam129b	blue
Stxbp1	blue
Lcn2	blue
Gbgt1	blue
Upp2	blue
Lamc3	blue
Kynu	blue
Gsn	blue
Stom	blue
Morn5	blue
Ifih1	blue
Agpat2	blue
Card9	blue
Traf2	blue
Nmi	blue
Sapcd2	blue
Uap1l1	blue
Zmynd19	blue
Psd4	blue
Il1rn	blue
Dusp19	blue
Cwc22	blue
Cybrd1	blue
P2rx3	blue
Slc43a3	blue
Ube2l6	blue
Med19	blue
Phospho2	blue
Commd9	blue
Pax6	blue
Cat	blue
Cd82	blue
Creb3l1	blue
Pdia3	blue
F2	blue
Slx4ip	blue
Ehd4	blue
Nusap1	blue
Spint1	blue
Siglec1	blue
Pcna	blue
Dusp2	blue
Slc20a1	blue
Il1b	blue
Il1a	blue
Lpin3	blue
Pcsk2	blue
Rrbp1	blue
Snx5	blue
Csrp2bp	blue
Cst3	blue
Angpt4	blue
Tpx2	blue
Dnmt3b	blue
Tpd52	blue
Zbp1	blue
Zdbf2	blue
Impa1	blue
Fabp5	blue
Snx16	blue
Atp9a	blue
Gid8	blue
Helz2	blue
Zbtb46	blue
Oprl1	blue
Acss2	blue
Procr	blue
Aar2	blue
Dsn1	blue
Samhd1	blue
Rbl1	blue
Wisp2	blue
Slc2a10	blue
Actl6a	blue
Ect2	blue
Anxa5	blue
1810062G17Rik	blue
Adad1	blue
Cog6	blue
Sucnr1	blue
Mfsd1	blue
Tm4sf1	blue
Vmn2r1	blue
Ccnl1	blue
Ptx3	blue
Dclre1b	blue
Olfml3	blue
Ngf	blue
Cd2	blue
Stxbp3a	blue
Clcc1	blue
Dennd2d	blue
S100a11	blue
Creb3l4	blue
Chrnb2	blue
Lrrc39	blue
Vcam1	blue
Col11a1	blue
Larp7	blue
Cyp2u1	blue
Hadh	blue
Tlr2	blue
Casp6	blue
Ifi44	blue
Gba	blue
Iqgap3	blue
Sh2d2a	blue
Fmo5	blue
Acp6	blue
Pias3	blue
Bcar3	blue
F3	blue
Them5	blue
Rorc	blue
Eif4e	blue
Nfkb1	blue
Manba	blue
Bdh2	blue
Depdc1a	blue
Lphn2	blue
Rpf1	blue
Bcl10	blue
Ddah1	blue
Cyr61	blue
Gem	blue
Calb1	blue
Decr1	blue
Atp6v0d2	blue
Ndufaf4	blue
Gbp3	blue
Gbp2	blue
Stra6l	blue
Tmod1	blue
Coro2a	blue
Tmeff1	blue
Tnfsf8	blue
Wdr31	blue
Aptx	blue
B4galt1	blue
Nfx1	blue
Epb4.1l4b	blue
Cd72	blue
Tln1	blue
Reck	blue
Glipr2	blue
Plin2	blue
Ptplad2	blue
Slc35d1	blue
Cdkn2c	blue
Angptl3	blue
Tm2d1	blue
Laptm5	blue
Pdpn	blue
Tnfrsf1b	blue
Cpt2	blue
Tmem59	blue
Exo5	blue
Fuca1	blue
Kif2c	blue
Mmachc	blue
Lurap1	blue
Rad54l	blue
Mknk1	blue
Pla2g2e	blue
Rnf19b	blue
Nipal3	blue
Csf3r	blue
Wasf2	blue
Fgr	blue
Arhgef19	blue
Necap2	blue
Padi2	blue
Hes2	blue
Tas1r1	blue
Per3	blue
Abcb1b	blue
Agtrap	blue
Arhgef16	blue
Prkcz	blue
Gnb1	blue
Mxra8	blue
Trmt44	blue
Acox3	blue
Hgfac	blue
Man2b2	blue
Stk32b	blue
Ociad1	blue
Pgm1	blue
Slc35f6	blue
Cenpa	blue
Fam114a1	blue
Pi4k2b	blue
Sel1l3	blue
Ugdh	blue
Rhoh	blue
Tec	blue
Slc30a9	blue
Fip1l1	blue
Nmu	blue
Stap1	blue
Gfi1	blue
Cdc7	blue
Gbp9	blue
Spp1	blue
Klhl8	blue
Slc10a6	blue
Plac8	blue
Crybb1	blue
Cxcl5	blue
Cxcl1	blue
Shroom3	blue
Tmed2	blue
Cxcl9	blue
Gbas	blue
Diablo	blue
Psmd9	blue
Aldh2	blue
P2rx7	blue
P2rx4	blue
Rnf34	blue
Anxa3	blue
Gpc2	blue
Acads	blue
Ints1	blue
Tes	blue
Oasl2	blue
Mmab	blue
Actb	blue
Plbd2	blue
Rph3a	blue
Ccz1	blue
Arpc1b	blue
Slc46a3	blue
Wnt16	blue
Fam3c	blue
Pax4	blue
Akr1b8	blue
Irf5	blue
Adcyap1r1	blue
Herc6	blue
Tmem176b	blue
Gpnmb	blue
Npy	blue
Zc3hav1	blue
Npvf	blue
Stra8	blue
Clec5a	blue
Hpgds	blue
Tbxas1	blue
Anxa4	blue
Lrig1	blue
M1ap	blue
Mrpl19	blue
Arhgap25	blue
Gp9	blue
Rab43	blue
Aldh1l1	blue
Tmem43	blue
Sumf1	blue
Edem1	blue
Usp18	blue
A2m	blue
Lag3	blue
Clec4e	blue
Clec4d	blue
Clec4a2	blue
Klrk1	blue
Cd69	blue
Clec1b	blue
Olr1	blue
Etv6	blue
Bcl2l14	blue
Gprc5d	blue
Gsg1	blue
Emp1	blue
Plbd1	blue
Arhgdib	blue
Dera	blue
Slco1b2	blue
Golt1b	blue
Lrmp	blue
Il17rc	blue
Cand2	blue
Klrb1c	blue
Cd27	blue
Ltbr	blue
Tnfrsf1a	blue
Cd9	blue
Dyrk4	blue
Klrb1a	blue
Clec2i	blue
Vasp	blue
U2af2	blue
Siglece	blue
Pcsk6	blue
Trpm1	blue
Nr2f2	blue
Ttc23	blue
Rab38	blue
Ctsc	blue
Cd22	blue
Tyrobp	blue
Rasgrp4	blue
Mfge8	blue
Ccdc90b	blue
Tmem126b	blue
Ccdc83	blue
Mvp	blue
Nupr1	blue
Cln3	blue
Slco2b1	blue
Il21r	blue
Il4ra	blue
Itgam	blue
Itgax	blue
Pycard	blue
Fus	blue
Cd37	blue
Nucb1	blue
Itgal	blue
Rgs10	blue
Bag3	blue
1700007K09Rik	blue
Gga2	blue
Tpp1	blue
Hpx	blue
Trim30a	blue
2610020H08Rik	blue
Oat	blue
Trim21	blue
Uros	blue
Pgap2	blue
Art1	blue
Mki67	blue
Usp11	blue
Fadd	blue
Zfp300	blue
Tnni2	blue
Syt8	blue
Sash3	blue
Elf4	blue
Cd40lg	blue
F9	blue
Prickle3	blue
Plp2	blue
Was	blue
Vbp1	blue
Msn	blue
Stard8	blue
Magt1	blue
Sytl4	blue
Btk	blue
Gla	blue
Col4a6	blue
Col4a5	blue
Chrdl1	blue
Il2rg	blue
Flna	blue
Nsdhl	blue
Arhgap6	blue
Xlr4c	blue
Car5b	blue
Zfp92	blue
Bgn	blue
Renbp	blue
Irak1	blue
Tktl1	blue
Mpp1	blue
Lamp1	blue
Gas6	blue
Rasa3	blue
Eif4ebp1	blue
Ggn	blue
Tnfsf13b	blue
Rab20	blue
Aga	blue
Agpat6	blue
Ash2l	blue
Gsr	blue
Pdgfrl	blue
Msmo1	blue
Sap30	blue
Scrg1	blue
Hpgd	blue
Irf2	blue
F11	blue
Adcy7	blue
Snx20	blue
Sall1	blue
Got2	blue
Smad1	blue
Il15	blue
Mmp2	blue
Mt2	blue
Mt1	blue
Nudt7	blue
Kifc3	blue
Tpm4	blue
Jak3	blue
6430548M08Rik	blue
Crispld2	blue
Cotl1	blue
Ifi30	blue
Pde4c	blue
1700030J22Rik	blue
Comp	blue
Lpar2	blue
Cmtm3	blue
Cmtm1	blue
Rrad	blue
Pla2g15	blue
Zfp90	blue
4931406C07Rik	blue
Adat1	blue
Tmem231	blue
Cog2	blue
Egln1	blue
St14	blue
Birc3	blue
Pou2f3	blue
Kirrel3	blue
Ppp2r1b	blue
Dixdc1	blue
Bco2	blue
Il10ra	blue
Cd3e	blue
Cd3d	blue
Slc37a2	blue
Abcg4	blue
Mcam	blue
Scg3	blue
Gnb5	blue
Ldlr	blue
Kank2	blue
Aqp9	blue
Ccnb2	blue
Myo1e	blue
Anxa2	blue
Cln6	blue
Celf6	blue
Ube2q2	blue
Etfa	blue
Elovl5	blue
Fam83b	blue
Ctsh	blue
Adamts7	blue
Plscr1	blue
Plscr2	blue
Tipin	blue
Zwilch	blue
Rwdd2a	blue
Crtap	blue
Cmtm7	blue
Tgfbr2	blue
Dhx30	blue
Pth1r	blue
Trib1	blue
Fbxl2	blue
Myd88	blue
Csrnp1	blue
Hhatl	blue
Lyzl4	blue
Ryk	blue
Bfsp2	blue
Gnai2	blue
Mrpl3	blue
Mapkapk3	blue
Amigo3	blue
Uba7	blue
Flcn	blue
Fhl3	blue
Oas3	blue
Prorsd1	blue
Oas2	blue
Nlrp3	blue
Lmo2	blue
2810474O19Rik	blue
Syde1	blue
Snx33	blue
Ablim3	blue
Inppl1	blue
Slc8b1	blue
Bet1	blue
Troap	blue
Pdxk	blue
Slc10a3	blue
Arap1	blue
P2ry2	blue
Cyb5r4	blue
Slc16a1	blue
Atg12	blue
Nfatc1	blue
Lss	blue
Slc35d2	blue
Atg9a	blue
Ybey	blue
Tmprss7	blue
Lpcat2	blue
Mamdc2	blue
AA467197	blue
Rac2	blue
Gm5134	blue
Fbxl8	blue
Dnm2	blue
Rtp4	blue
Frrs1	blue
Antxr1	blue
Lpar6	blue
Tagap	blue
BC026585	blue
Ttc7b	blue
Casp4	blue
Angptl1	blue
Tmem35	blue
Igf2bp2	blue
Caskin1	blue
Ptplad1	blue
Qsox1	blue
Ucp2	blue
BC034090	blue
Rpap2	blue
Tlr13	blue
Dnah8	blue
Lgals3bp	blue
Mapkbp1	blue
Aspm	blue
Cd226	blue
Lyl1	blue
Poglut1	blue
Ano7	blue
Kctd7	blue
Vav1	blue
Pomt2	blue
Emid1	blue
Ccnd3	blue
Ankmy1	blue
Foxj1	blue
Batf	blue
Jdp2	blue
Nek9	blue
Brip1	blue
Plcg2	blue
Fam151b	blue
Lif	blue
Spata6	blue
Parp14	blue
Gbp8	blue
Eda2r	blue
Ifit1	blue
Kdelc2	blue
Slc41a2	blue
Ppp1r18	blue
Setmar	blue
Cd300ld	blue
Cd300a	blue
Bmp2k	blue
Fras1	blue
Gns	blue
Grn	blue
Gpsm3	blue
Gna15	blue
Cpne7	blue
Scn7a	blue
Nxnl1	blue
Cxcl10	blue
Ttc22	blue
Dhcr24	blue
Tmem106a	blue
Cog7	blue
Cebpa	blue
Atcay	blue
5031414D18Rik	blue
Lbx2	blue
Igsf6	blue
Baz1a	blue
C8a	blue
Ccl5	blue
Zc4h2	blue
Fam167a	blue
Eva1a	blue
Shc4	blue
Neil2	blue
Kcne3	blue
Ubd	blue
Slfn8	blue
Leprot	blue
Rims4	blue
Lcat	blue
Hpse	blue
Ssc5d	blue
Adrb1	blue
Sgcg	blue
Ccl12	blue
Ccl7	blue
Shq1	blue
Ccl2	blue
Brsk1	blue
Cfap53	blue
Crb2	blue
Tmem98	blue
Plk5	blue
Tgfbi	blue
L3mbtl1	blue
Mboat7	blue
Frmpd1	blue
Midn	blue
Dos	blue
Sbno2	blue
Tnfsf9	blue
Isg15	blue
Hmha1	blue
Alg8	blue
Usp35	blue
Ggta1	blue
Twist1	blue
Mlc1	blue
Pawr	blue
AI182371	blue
Rnase1	blue
Gramd4	blue
Dennd5a	blue
Bbs9	blue
H2-Q4	blue
Fam214b	blue
Smug1	blue
Gatad2a	blue
Hist1h1c	blue
Pdzrn4	blue
3632451O06Rik	blue
9530068E07Rik	blue
Gramd1c	blue
Igsf10	blue
Csgalnact1	blue
Gpr101	blue
P2ry13	blue
Gadd45a	blue
Elf1	blue
Tmem255a	blue
Card11	blue
Ppfibp2	blue
Ermard	blue
Sh3tc1	blue
Lgi4	blue
Ndrg4	blue
Ttyh3	blue
Fxyd1	blue
Fut7	blue
H2-Aa	blue
Plxnb2	blue
Clcn7	blue
Tbc1d9b	blue
Dennd3	blue
Micall2	blue
Kif15	blue
Pnpla7	blue
Hspb6	blue
Wnt4	blue
Abcc12	blue
Dna2	blue
Arhgap33	blue
C1qa	blue
C1qc	blue
C1qb	blue
Unc93b1	blue
Piwil4	blue
Kirrel2	blue
Stag3	blue
4921524J17Rik	blue
Pml	blue
Asap3	blue
Wdr62	blue
Tspan15	blue
E330009J07Rik	blue
Elf2	blue
Pacrg	blue
Prf1	blue
Mxd4	blue
Ldlrap1	blue
Man1c1	blue
Traf3ip3	blue
Tap1	blue
Pafah2	blue
Hhat	blue
Icam1	blue
Serpine1	blue
Fer1l5	blue
Adam32	blue
Arid5a	blue
4930427A07Rik	blue
Papl	blue
Erv3	blue
Mavs	blue
Aldh8a1	blue
Dlgap5	blue
H2-DMb2	blue
Plekhg2	blue
Ephx3	blue
Gch1	blue
Atoh8	blue
Slc25a43	blue
Zbtb42	blue
H2-DMa	blue
Gpr160	blue
Esyt3	blue
Aspg	blue
Cd81	blue
Ckap2	blue
Themis2	blue
Eef1a1	blue
Phyhipl	blue
Ctnna1	blue
Tgm2	blue
Smim14	blue
Tspan14	blue
Gm4955	blue
Aim2	blue
Ddx60	blue
Wnk2	blue
Fam188b	blue
Socs1	blue
Sult6b1	blue
Nod1	blue
Atp13a4	blue
Cd84	blue
Prdm1	blue
Leprel1	blue
Slamf7	blue
Scarf1	blue
Rilp	blue
Asb10	blue
Tapbpl	blue
Serpinf2	blue
F11r	blue
Snx25	blue
Edem2	blue
Arl5c	blue
Mllt6	blue
Dcun1d2	blue
Parp12	blue
Gdf15	blue
C1s1	blue
Car14	blue
C1rl	blue
Atf5	blue
Sp6	blue
Rad9b	blue
Tctn1	blue
Mcl1	blue
Degs1	blue
Ctss	blue
Rnh1	blue
Hoxb4	blue
Gmeb2	blue
Fam63a	blue
Trhr	blue
Ptpn3	blue
Ephx1	blue
Gngt2	blue
Ctnnal1	blue
Gcnt1	blue
Pi4kb	blue
Rccd1	blue
Prc1	blue
Edc3	blue
Cpq	blue
Siglecf	blue
Tasp1	blue
Pigk	blue
Eme1	blue
Echdc3	blue
Cpa4	blue
L3mbtl3	blue
Gpr126	blue
Akna	blue
Adk	blue
Rpl39l	blue
Suv39h1	blue
Stx11	blue
Isg20	blue
Vstm2b	blue
Gimap3	blue
BC017643	blue
Cdk5rap2	blue
Ndst2	blue
Hlx	blue
Neil3	blue
Dcxr	blue
Prrx2	blue
Znfx1	blue
Atp8b1	blue
Stau1	blue
Grin3a	blue
Mocos	blue
Icmt	blue
Mrps6	blue
Lap3	blue
Tspan10	blue
Batf2	blue
Ralyl	blue
Slx4	blue
Galnt12	blue
Xkr5	blue
Wdr70	blue
Trim14	blue
Slc44a3	blue
Spsb1	blue
Rhbdd2	blue
Gsap	blue
Ptger4	blue
Clstn1	blue
Mettl20	blue
Zc3h12d	blue
Timeless	blue
Stat2	blue
Rbms2	blue
Plcb2	blue
Pfpl	blue
Bmf	blue
Flywch1	blue
Gpr176	blue
Tax1bp3	blue
Kcns1	blue
Ankrd6	blue
Scamp2	blue
Ccdc114	blue
2810417H13Rik	blue
Tbc1d10c	blue
Gbp7	blue
Daam2	blue
Gbp5	blue
Ndufa4l2	blue
Ddx58	blue
Btbd16	blue
Cchcr1	blue
Olfr56	blue
Arhgap9	blue
Plekha4	blue
Xaf1	blue
Sox30	blue
Cblc	blue
Milr1	blue
Matn1	blue
C3ar1	blue
Apoc1	blue
Ranbp17	blue
Apobec1	blue
Clcf1	blue
Mthfd1l	blue
Sh3pxd2b	blue
Klc3	blue
Slc25a34	blue
Cd53	blue
Lat2	blue
Hlcs	blue
Zmynd15	blue
Six5	blue
Szrd1	blue
Dlk1	blue
Wdr25	blue
S100pbp	blue
Asgr2	blue
Abhd4	blue
Cmtm8	blue
Mslnl	blue
Tmco4	blue
Spem1	blue
Mul1	blue
Thoc6	blue
Atp1b2	blue
D19Bwg1357e	blue
Cldn5	blue
Ccnb1	blue
Piezo2	blue
Irf8	blue
[truncated: 16,052 more rows]

## Sheet: Hipp. MEblue_DEA
Hippocampus bulk-RNA-seq - MEblue DEA PS19/P2rx7KO vs PS19, related to Fig. 3e,f and Extended Data Fig. 2c
feature	symbol	gene_title	logFC	AveExprPS19	AveExprPS19/P2rx7KO	meta.q
ENSMUSG00000030789	Itgax	integrin alpha X	-2.932	7.7793	4.8478	1.538e-16
ENSMUSG00000018774	Cd68	CD68 antigen	-1.309	8.8384	7.529	8.179e-15
ENSMUSG00000004707	Ly9	lymphocyte antigen 9	-1.376	5.572	4.1961	5.459e-14
ENSMUSG00000026177	Slc11a1	solute carrier family 11 (proton-coupled divalent ...	-1.366	6.9922	5.6262	6.618e-14
ENSMUSG00000037686	Aspg	asparaginase	-1.476	7.9586	6.4822	8.068e-14
ENSMUSG00000000682	Cd52	CD52 antigen	-1.6	6.9686	5.3688	8.081e-14
ENSMUSG00000030577	Cd22	CD22 antigen	-1.315	5.4133	4.0982	8.081e-14
ENSMUSG00000023992	Trem2	triggering receptor expressed on myeloid cells 2	-1.233	9.2727	8.0392	8.081e-14
ENSMUSG00000041515	Irf8	interferon regulatory factor 8	-1.036	7.766	6.7297	8.081e-14
ENSMUSG00000056737	Capg	capping actin protein, gelsolin like	-1.052	6.7878	5.7354	1.078e-13
ENSMUSG00000073418	C4b	complement C4B (Chido blood group)	-1.758	12.2883	10.5306	1.094e-13
ENSMUSG00000026656	Fcgr2b	Fc receptor, IgG, low affinity IIb	-1.265	7.4811	6.2161	1.414e-13
ENSMUSG00000035778	Ggta1	glycoprotein galactosyltransferase alpha 1, 3	-1.142	7.553	6.4112	1.761e-13
ENSMUSG00000030579	Tyrobp	TYRO protein tyrosine kinase binding protein	-1.207	9.0861	7.8791	2.303e-13
ENSMUSG00000024300	Myo1f	myosin IF	-0.9177	6.9956	6.0779	2.449e-13
ENSMUSG00000059336	Slc14a1	solute carrier family 14 (urea transporter), membe...	-0.9169	9.0134	8.0965	3.973e-13
ENSMUSG00000004266	Ptpn6	protein tyrosine phosphatase, non-receptor type 6	-0.8531	7.2741	6.4209	4.063e-13
ENSMUSG00000026480	Ncf2	neutrophil cytosolic factor 2	-0.7178	6.6979	5.9801	4.936e-13
ENSMUSG00000040552	C3ar1	complement component 3a receptor 1	-0.8337	6.1514	5.3176	5.232e-13
ENSMUSG00000014599	Csf1	colony stimulating factor 1 (macrophage)	-0.755	9.5179	8.7629	6.248e-13
ENSMUSG00000030124	Lag3	lymphocyte-activation gene 3	-1.571	8.9241	7.3529	6.536e-13
ENSMUSG00000036887	C1qa	complement component 1, q subcomponent, alpha poly...	-1.464	11.3483	9.8841	1.443e-12
ENSMUSG00000000290	Itgb2	integrin beta 2	-1.007	7.6835	6.6763	1.443e-12
ENSMUSG00000068129	Cst7	cystatin F (leukocystatin)	-2.498	6.8605	4.363	1.71e-12
ENSMUSG00000028859	Csf3r	colony stimulating factor 3 receptor	-1.085	8.3181	7.2328	1.91e-12
ENSMUSG00000026395	Ptprc	protein tyrosine phosphatase receptor type C	-1.052	7.0164	5.9647	1.91e-12
ENSMUSG00000079293	Clec7a	C-type lectin domain family 7, member a	-1.621	5.4833	3.8621	2.572e-12
ENSMUSG00000029622	Arpc1b	actin related protein 2/3 complex, subunit 1B	-0.8149	8.6084	7.7935	3.745e-12
ENSMUSG00000067586	S1pr3	sphingosine-1-phosphate receptor 3	-1.357	8.4251	7.0677	3.771e-12
ENSMUSG00000064267	Hvcn1	hydrogen voltage-gated channel 1	-0.8979	6.9208	6.0229	5.335e-12
ENSMUSG00000021423	Ly86	lymphocyte antigen 86	-1.186	8.7318	7.5454	5.498e-12
ENSMUSG00000058715	Fcer1g	Fc receptor, IgE, high affinity I, gamma polypepti...	-0.9465	8.1333	7.1868	5.773e-12
ENSMUSG00000020120	Plek	pleckstrin	-0.742	8.3676	7.6255	6.688e-12
ENSMUSG00000021091	Serpina3n	serine (or cysteine) peptidase inhibitor, clade A,...	-1.802	11.3811	9.5786	6.732e-12
ENSMUSG00000006519	Cyba	cytochrome b-245, alpha polypeptide	-0.8002	7.4709	6.6707	7.606e-12
ENSMUSG00000005413	Hmox1	heme oxygenase 1	-0.6997	7.1206	6.421	8.058e-12
ENSMUSG00000026786	Apbb1ip	amyloid beta precursor protein binding family B me...	-0.6077	7.4019	6.7942	8.986e-12
ENSMUSG00000025232	Hexa	hexosaminidase A	-0.3995	9.7891	9.3896	9.387e-12
ENSMUSG00000036896	C1qc	complement component 1, q subcomponent, C chain	-1.263	10.8825	9.6192	1.056e-11
ENSMUSG00000020932	Gfap	glial fibrillary acidic protein	-1.424	14.5025	13.0785	1.699e-11
ENSMUSG00000038147	Cd84	CD84 antigen	-1.002	6.7206	5.7189	1.699e-11
ENSMUSG00000018920	Cxcl16	C-X-C motif chemokine ligand 16	-0.9595	6.0991	5.1396	1.913e-11
ENSMUSG00000016256	Ctsz	cathepsin Z	-1.014	10.3021	9.2883	2.022e-11
ENSMUSG00000038642	Ctss	cathepsin S	-1.27	11.3612	10.0911	2.28e-11
ENSMUSG00000027995	Tlr2	toll-like receptor 2	-0.9326	6.0075	5.0749	2.283e-11
ENSMUSG00000062593	Lilrb4a	leukocyte immunoglobulin-like receptor, subfamily ...	-1.642	5.6599	4.0176	2.353e-11
ENSMUSG00000046805	Mpeg1	macrophage expressed gene 1	-1.127	9.8553	8.7278	2.353e-11
ENSMUSG00000021665	Hexb	hexosaminidase B	-0.7912	11.1859	10.3947	2.353e-11
ENSMUSG00000002602	Axl	AXL receptor tyrosine kinase	-0.5467	9.9299	9.3832	2.588e-11
ENSMUSG00000024737	Slc15a3	solute carrier family 15, member 3	-0.7524	6.1694	5.417	2.711e-11
ENSMUSG00000036908	Unc93b1	unc-93 homolog B1, TLR signaling regulator	-0.8169	8.786	7.9691	2.732e-11
ENSMUSG00000020902	Ntn1	netrin 1	0.6099	6.2184	6.8283	2.732e-11
ENSMUSG00000036564	Ndrg4	N-myc downstream regulated gene 4	0.4629	13.7027	14.1656	2.881e-11
ENSMUSG00000021939	Ctsb	cathepsin B	-0.4545	13.1688	12.7144	3.374e-11
ENSMUSG00000001025	S100a6	S100 calcium binding protein A6 (calcyclin)	-1.049	8.173	7.1239	4.037e-11
ENSMUSG00000029484	Anxa3	annexin A3	-0.5986	7.7899	7.1913	4.412e-11
ENSMUSG00000030342	Cd9	CD9 antigen	-0.9012	10.209	9.3078	5.007e-11
ENSMUSG00000036905	C1qb	complement component 1, q subcomponent, beta polyp...	-1.232	10.916	9.6845	6.253e-11
ENSMUSG00000030341	Tnfrsf1a	tumor necrosis factor receptor superfamily, member...	-0.7524	8.0423	7.29	6.253e-11
ENSMUSG00000053113	Socs3	suppressor of cytokine signaling 3	-0.9665	6.1551	5.1886	6.969e-11
ENSMUSG00000035673	Sbno2	strawberry notch 2	-0.5761	8.8403	8.2642	8.619e-11
ENSMUSG00000022146	Osmr	oncostatin M receptor	-1.603	8.1856	6.5822	9.142e-11
ENSMUSG00000026728	Vim	vimentin	-1.627	11.2953	9.6681	1.133e-10
ENSMUSG00000036560	Lgi4	leucine-rich repeat LGI family, member 4	-0.497	9.8076	9.3106	1.174e-10
ENSMUSG00000031207	Msn	moesin	-0.6725	9.4107	8.7382	1.358e-10
ENSMUSG00000064246	Chi3l1	chitinase 3 like 1	-1.058	8.8354	7.7775	1.592e-10
ENSMUSG00000041939	Mvk	mevalonate kinase	0.5382	7.2226	7.7609	1.592e-10
ENSMUSG00000053175	Bcl3	B cell leukemia/lymphoma 3	-1.234	4.9491	3.7148	1.609e-10
ENSMUSG00000034708	Grn	granulin	-0.7181	10.5317	9.8137	2.144e-10
ENSMUSG00000022218	Tgm1	transglutaminase 1, K polypeptide	-1.729	5.512	3.7828	2.41e-10
ENSMUSG00000084883	Ccdc85c	coiled-coil domain containing 85C	0.7584	6.6073	7.3657	2.418e-10
ENSMUSG00000029919	Hpgds	hematopoietic prostaglandin D synthase	-0.581	7.2341	6.6531	3.265e-10
ENSMUSG00000059498	Fcgr3	Fc receptor, IgG, low affinity III	-0.8043	8.442	7.6377	3.504e-10
ENSMUSG00000069516	Lyz2	lysozyme 2	-2.031	9.3553	7.3238	3.966e-10
ENSMUSG00000026839	Upp2	uridine phosphorylase 2	0.5943	7.3922	7.9864	3.966e-10
ENSMUSG00000050288	Fzd2	frizzled class receptor 2	0.9444	5.8485	6.7929	4.706e-10
ENSMUSG00000024610	Cd74	CD74 antigen (invariant polypeptide of major histo...	-3.127	10.2577	7.1307	5.156e-10
ENSMUSG00000022488	Nckap1l	NCK associated protein 1 like	-0.633	8.1366	7.5036	5.463e-10
ENSMUSG00000023367	Tmem176a	transmembrane protein 176A	-0.5684	8.0205	7.4521	6.239e-10
ENSMUSG00000040877	Wdr25	WD repeat domain 25	0.6089	6.1182	6.727	6.976e-10
ENSMUSG00000015340	Cybb	cytochrome b-245, beta polypeptide	-1.29	5.65	4.3599	7.929e-10
ENSMUSG00000031762	Mt2	metallothionein 2	-0.8654	11.6766	10.8112	1.047e-09
ENSMUSG00000040820	Hlcs	holocarboxylase synthetase (biotin- [propriony-Coe...	0.5165	6.5601	7.0766	1.047e-09
ENSMUSG00000000794	Kcnn3	potassium intermediate/small conductance calcium-a...	0.8457	6.5227	7.3684	1.061e-09
ENSMUSG00000007891	Ctsd	cathepsin D	-0.8731	13.2615	12.3884	1.196e-09
ENSMUSG00000024462	Gabbr1	gamma-aminobutyric acid type B receptor subunit 1	0.3971	12.7885	13.1856	1.27e-09
ENSMUSG00000005087	Cd44	CD44 antigen	-1.27	7.5152	6.2456	1.346e-09
ENSMUSG00000051439	Cd14	CD14 antigen	-0.6924	6.1022	5.4098	1.356e-09
ENSMUSG00000021998	Lcp1	lymphocyte cytosolic protein 1	-0.8074	7.9149	7.1075	1.465e-09
ENSMUSG00000017760	Ctsa	cathepsin A	-0.3805	10.8984	10.5179	1.72e-09
ENSMUSG00000005373	Mlxipl	MLX interacting protein-like	-0.5096	6.8109	6.3012	1.973e-09
ENSMUSG00000018927	Ccl6	C-C motif chemokine ligand 6	-1.436	6.6955	5.2598	2.199e-09
ENSMUSG00000020143	Dock2	dedicator of cyto-kinesis 2	-0.6684	6.986	6.3176	2.224e-09
ENSMUSG00000052142	Rasal3	RAS protein activator like 3	-0.6317	6.7914	6.1597	2.289e-09
ENSMUSG00000040747	Cd53	CD53 antigen	-0.5578	6.8709	6.3131	2.289e-09
ENSMUSG00000022912	Pros1	protein S (alpha)	-0.5154	7.8738	7.3584	2.355e-09
ENSMUSG00000052336	Cx3cr1	C-X3-C motif chemokine receptor 1	-0.6216	9.9689	9.3473	2.782e-09
ENSMUSG00000022037	Clu	clusterin	-0.4269	14.1924	13.7655	2.903e-09
ENSMUSG00000023249	Parp3	poly (ADP-ribose) polymerase family, member 3	-0.7486	7.2254	6.4769	3.245e-09
ENSMUSG00000020097	Sgpl1	sphingosine phosphate lyase 1	-0.3194	9.2221	8.9027	3.325e-09
ENSMUSG00000074657	Kif5a	kinesin family member 5A	0.6576	13.6976	14.3552	3.441e-09
ENSMUSG00000024164	C3	complement component 3	-1.819	7.9865	6.1676	3.582e-09
ENSMUSG00000021624	Cd180	CD180 antigen	-0.9818	6.859	5.8772	3.796e-09
ENSMUSG00000040613	Apobec1	apolipoprotein B mRNA editing enzyme, catalytic po...	-0.8074	6.1194	5.312	4.163e-09
ENSMUSG00000046312	Myorg	myogenesis regulating glycosidase (putative)	0.7747	7.8951	8.6698	4.163e-09
ENSMUSG00000074622	Mafb	MAF bZIP transcription factor B	-0.5939	8.2572	7.6632	5.891e-09
ENSMUSG00000039013	Siglecf	sialic acid binding Ig-like lectin F	-0.9489	5.187	4.2382	5.955e-09
ENSMUSG00000026608	Kctd3	potassium channel tetramerisation domain containin...	0.3137	9.721	10.0346	6.07e-09
ENSMUSG00000062760	Shisal1	shisa like 1	0.695	9.2036	9.8985	6.93e-09
ENSMUSG00000037405	Icam1	intercellular adhesion molecule 1	-0.8853	6.4914	5.6061	7.245e-09
ENSMUSG00000001020	S100a4	S100 calcium binding protein A4	-0.7503	5.7153	4.965	7.859e-09
ENSMUSG00000015484	Fam163a	family with sequence similarity 163, member A	0.8705	6.6849	7.5553	8.642e-09
ENSMUSG00000052160	Pld4	phospholipase D family member 4	-0.7702	7.9872	7.217	8.904e-09
ENSMUSG00000015879	Fam184b	family with sequence similarity 184, member B	0.6719	5.8361	6.5079	1.104e-08
ENSMUSG00000028583	Pdpn	podoplanin	-0.8292	8.5323	7.7031	1.237e-08
ENSMUSG00000053931	Cnn3	calponin 3, acidic	-0.5689	10.8122	10.2434	1.26e-08
ENSMUSG00000079215	Zfp664	zinc finger protein 664	0.3303	9.9799	10.3102	1.306e-08
ENSMUSG00000027281	Slx4ip	SLX4 interacting protein	0.5723	6.0111	6.5834	1.366e-08
[truncated: 2,412 more rows]
