# Supplementary material for: P2RX7 regulates tauopathy progression via tau and mitochondria loading in extracellular vesicles
Source: Research Square preprint supplement (doi:10.21203/rs.3.rs-6771517/v1), 2025-06-23
Supplement: Supplementary file 7 [file 9dd0d9e07236df7c72fc7dae.xlsx]

## Sheet: scRNAseq_Microglia_PS19 vs WT
Gene	log2FC	Log10 adjusted p_val
Gm49692	7.143	3.63
Colec12	6.813	7.42
Ang4	6.808	6.73
Pianp	6.662	2.11
Gnb4	6.094	5.6
Rpl31-ps21	5.803	5
Cd36	5.687	5.22
Adgrg5	5.532	4.61
Cd300lf	5.394	3.16
Klk1b22	5.222	4.47
Rprl3	5.211	5.6
Actr3-ps	5.21	2.69
Gm40847	5.163	4.4
Gm40864	5.135	5.22
Scml2	5.092	3.91
4930519F16Rik	5.002	2.17
ENSMUSG00000120201	4.7	4.86
Pira12	4.603	4.73
Rps7-ps3	4.571	4.47
Gm14584	4.518	3
Gm5503	4.504	5.07
Lilra6	4.445	4.61
Brinp2	4.382	1.65
B230206L02Rik	4.347	3.96
Gm29536	4.347	2.85
Naip3	4.277	3.64
Gm12865	4.183	2.37
Hmga2	4.182	4.1
Gm6645	4.161	3.43
Gm5824	3.991	4.53
Gm3375	3.982	4.16
Pcna-ps2	3.911	3.94
Gm48733	3.834	4.61
Rab37	3.715	2.43
Cd5	3.614	2.34
Pcnx2	3.58	3.73
Gm37800	3.579	3.43
Gm12861	3.418	3.14
Gm44257	3.292	1.73
Atp6v0e2	3.288	4.71
Hcar1	3.244	3.25
Gm19196	3.224	3.09
Nme7	3.212	7.85
Cd300ld	3.182	2.39
Ahnak2	3.125	2.46
Fos	3.11	1.47
Hal	3.064	2.36
Parpbp	3.063	3.09
Gm37560	2.991	2.19
Maff	2.973	1.56
Cacng8	2.969	2.46
Bnipl	2.899	3.12
Tamalin	2.846	1.39
Kcp	2.842	3.4
Nrxn1	2.836	3.66
Mycbpap	2.83	2.64
Dusp1	2.799	1.36
Pira1	2.764	2.39
Fosb	2.75	1.33
Kcna3	2.659	2.23
Gm10802	2.648	1.86
Car13	2.634	2.59
ENSMUSG00000120586	2.595	1.51
Cacna1a	2.563	1.37
ENSMUSG00000120114	2.554	1.73
4930532G15Rik	2.553	1.53
Crhr2	2.526	3.06
Arsb	2.506	7.85
Qsox1	2.493	6.22
Zc3hav1l	2.475	3.32
Egr1	2.472	1.51
Gm14866	2.41	3.13
Ccrl2	2.408	2.06
Gem	2.401	1.57
Unc5cl	2.4	3.51
Il1r2	2.392	3.13
A430093F15Rik	2.388	2.11
ENSMUSG00000120692	2.387	1.99
ENSMUSG00000121207	2.376	1.6
Klf2	2.368	1.69
Egr2	2.362	2.03
Ccl3	2.359	1.37
ENSMUSG00000120101	2.345	1.68
C330011M18Rik	2.343	1.72
ENSMUSG00000120835	2.324	1.71
Lzts1	2.323	1.32
Gm47819	2.32	2.19
ENSMUSG00000120240	2.316	2.46
Lmna	2.312	3.32
Adamts17	2.312	1.36
D930030I03Rik	2.286	1.41
Gm33524	2.28	2.45
Gm47794	2.272	1.96
ENSMUSG00000119955	2.271	3.64
Nr4a1	2.271	1.9
Sh2d1b1	2.247	1.4
Gm13391	2.244	1.48
ENSMUSG00000121487	2.242	2.94
Tshz3	2.242	2
Gm12856	2.238	2.26
Wee1	2.221	1.94
ENSMUSG00000119946	2.186	1.47
Gm29282	2.182	2.6
Arhgap27os3	2.176	5.77
Atf3	2.174	2.03
Adamts1	2.174	1.51
Ccl4	2.165	1.56
Gm5112	2.155	1.67
ENSMUSG00000121065	2.15	2.6
Gm34961	2.142	1.92
Sh3rf1	2.128	3.32
Gm4366	2.126	1.92
ENSMUSG00000120001	2.118	1.77
Gm15880	2.115	2.7
4833445I07Rik	2.111	1.81
Prkcq	2.11	2.02
AI504432	2.108	2.86
Art3	2.094	2.88
Gm26531	2.075	2.84
Spry1	2.063	4.1
Dlgap5	2.063	2.4
Gm26887	2.061	2.05
Gm11769	2.041	2.39
ENSMUSG00000120147	2.03	1.71
Gm43964	2.03	1.63
H4c1	2.027	1.55
Glipr2	2.026	2.18
B930036N10Rik	2.022	1.45
Klf4	2.011	2.14
Etl4	1.994	1.61
Gm12610	1.975	4.7
Gm5420	1.974	1.7
Ppp1r15a	1.964	1.95
Gm37125	1.962	1.83
1700020N01Rik	1.96	1.69
Bcl2a1d	1.951	1.59
Frem2	1.948	2.75
Gm6475	1.941	2.28
Gm49626	1.937	2.12
ENSMUSG00000121266	1.937	1.49
Tuba1c	1.931	2.75
Csrnp1	1.917	2.57
ENSMUSG00000120546	1.909	1.82
1700034H15Rik	1.908	1.82
Emilin1	1.905	2.37
Plppr4	1.897	3.74
Or5v1	1.893	2.68
Nfkbid	1.891	1.8
Sfmbt2	1.886	4.1
Nfkbiz	1.885	2.18
Gm34455	1.882	1.44
Cfap77	1.88	2.45
ENSMUSG00000121109	1.87	1.82
Pnp2	1.853	2.46
Sik1	1.853	2.26
Ier2	1.846	1.53
Gm10138	1.842	3.88
Gm47448	1.83	2.58
Ccl2	1.821	1.75
Ube2e2	1.804	3.3
Slamf8	1.801	4.93
ENSMUSG00000120712	1.797	2.77
Tomt	1.794	1.53
ENSMUSG00000120030	1.789	1.78
Pmaip1	1.763	2.58
Gm50240	1.759	2.8
ENSMUSG00000120402	1.758	1.65
Rcan2	1.756	1.71
Rilpl2	1.745	2.25
A530013C23Rik	1.738	2.12
Mir22hg	1.738	2.03
Tlcd2	1.735	2.44
Gm16998	1.726	2.21
Gm49064	1.725	1.67
1700023H06Rik	1.722	1.76
Pld5	1.717	1.93
Cdkn1a	1.71	2.46
Gm26698	1.704	1.68
ENSMUSG00000120135	1.702	1.84
Tob1	1.7	2.72
ENSMUSG00000120202	1.698	1.63
Gm49625	1.696	1.38
ENSMUSG00000120054	1.694	2.21
ENSMUSG00000120180	1.69	1.69
Tom1l1	1.681	5.06
Zfp457	1.675	2.38
Gpa33	1.674	2.02
ENSMUSG00000120112	1.673	1.46
Mafk	1.672	3.22
Zfp612	1.671	2.29
Rgs1	1.671	2.09
Edn1	1.669	1.9
Rad51c	1.666	1.87
Or10ak7	1.654	2.27
Gm15706	1.654	1.8
H4c16	1.652	2.03
Synpo	1.651	2.38
Masp1	1.648	4.17
ENSMUSG00000120049	1.648	1.86
Cdk5rap1	1.637	4.63
ENSMUSG00000120594	1.633	1.75
Iho1	1.617	2.68
Rasgef1b	1.616	1.98
Lrrc75aos2	1.616	1.57
Gm8091	1.614	1.78
Socs3	1.612	1.34
Creb5	1.608	2.24
A930014D07Rik	1.608	2.05
Gm6206	1.607	1.39
ENSMUSG00000120430	1.604	1.57
Spock1	1.602	3.77
Marcksl1	1.602	3.04
Gm9891	1.601	1.57
Mcc	1.591	3.3
Gm49393	1.589	2.74
Clec2i	1.587	1.61
ENSMUSG00000120677	1.582	1.47
Gm20663	1.58	2.26
ENSMUSG00000120387	1.578	1.39
4930404I05Rik	1.572	1.47
Id2	1.57	2.28
Ptger3	1.565	1.46
1700020L13Rik	1.558	1.82
Rasgrp4	1.554	4.88
Gm38560	1.552	2.01
ENSMUSG00000120025	1.551	1.62
Trerf1	1.542	2.46
Fndc7	1.542	2.24
Ccr2	1.525	3.02
Cks2	1.524	1.69
Il1a	1.522	3.05
Tnfrsf12a	1.519	2.35
Gm4285	1.517	1.9
C730034F03Rik	1.512	2.17
A630001O12Rik	1.512	1.86
Gla	1.497	2.22
Thsd7b	1.496	1.74
Gm14023	1.496	1.51
Cd83	1.494	2.17
Gm35330	1.487	1.99
Chic1	1.48	2.25
Zfp36	1.477	2.42
Gm37305	1.472	2.08
C030037D09Rik	1.469	2.42
Dusp8	1.465	2.3
1700025G04Rik	1.463	3.46
Kif7	1.46	1.77
ENSMUSG00000120467	1.456	1.36
ENSMUSG00000120134	1.455	1.92
Jun	1.45	1.82
ENSMUSG00000120313	1.45	1.4
Dusp18	1.449	2.37
ENSMUSG00000120429	1.448	1.62
ENSMUSG00000120029	1.445	1.91
B3gnt7	1.444	1.49
Gm10804	1.444	1.34
Capn1	1.443	2.25
ENSMUSG00000121130	1.441	1.62
Gm15983	1.438	1.8
Xpr1	1.437	6.22
4930445N18Rik	1.437	1.45
Gm49454	1.434	1.35
Btg2	1.429	2.75
Neat1	1.427	1.95
Plekhh2	1.42	3.56
Slamf7	1.408	1.39
Gm36445	1.407	3.01
Ccdc102a	1.401	2.62
0610039K10Rik	1.4	1.52
Tex14	1.399	1.64
4933424G05Rik	1.397	2.15
Adat3	1.39	1.46
9530036M11Rik	1.388	1.42
Rspo1	1.387	1.91
Gpat2	1.384	1.73
Gm37876	1.383	1.6
ENSMUSG00000121258	1.381	1.7
Cmtm8	1.379	4.57
Ctla2b	1.379	2.63
Il1r1	1.379	2.25
Gm28809	1.379	1.32
AA414768	1.375	1.92
Ssbp2	1.366	4.09
Pard6g	1.357	1.9
Ccdc8	1.348	1.44
Gm44710	1.347	1.97
ENSMUSG00000120036	1.346	1.83
2810442N19Rik	1.345	1.59
Plekha4	1.344	1.93
ENSMUSG00000120188	1.339	1.83
Nbl1	1.333	2.7
4933404O12Rik	1.329	2.3
Bzw2	1.326	5.6
Errfi1	1.325	2.99
Itgad	1.324	1.69
BC037704	1.324	1.41
ENSMUSG00000121108	1.32	1.7
Hspa1l	1.318	1.73
Timeless	1.318	1.45
Nr4a2	1.317	1.47
Arhgap15	1.315	3.4
Gm44574	1.315	1.73
Igfbp4	1.314	1.8
Zfyve21	1.307	3.43
Vstm4	1.307	2.12
Glrx	1.304	3.92
9330020H09Rik	1.302	1.38
Gm15569	1.294	1.35
Rapgefl1	1.293	2.13
Gm49969	1.291	1.46
Kntc1	1.284	1.58
Gm2479	1.284	1.52
Timm8a1	1.275	1.45
Gm32552	1.275	1.4
Meig1	1.272	1.62
Cage1	1.272	1.5
Ciart	1.266	1.37
2010013B24Rik	1.264	1.46
Traf1	1.261	1.86
5031434O11Rik	1.254	2.6
F630206G17Rik	1.25	2.51
Gm41361	1.249	2.11
1700086P04Rik	1.246	1.69
Hdac9	1.245	3.59
ENSMUSG00000120996	1.245	1.56
1700055D18Rik	1.24	1.52
Ryr1	1.24	1.45
Gm14634	1.231	1.57
Tmem150c	1.23	1.72
Gm44949	1.227	1.4
ENSMUSG00000120397	1.227	1.38
Map3k20	1.223	3.21
Lrrc8b	1.221	1.91
Snhg4 - ENSMUSG00000117694	1.221	1.54
ENSMUSG00000120869	1.221	1.43
ENSMUSG00000121251	1.217	2.09
Gm37168	1.217	1.67
Ube2s	1.216	1.86
Gm37352	1.216	1.79
Prr7	1.215	1.55
Gm56350	1.21	1.8
Slc25a25	1.208	4.1
2810013P06Rik	1.207	2
Baiap2	1.206	2.46
Gm14471	1.206	1.38
Lrguk	1.206	1.35
Hbegf	1.203	1.36
1810055G02Rik	1.201	1.56
4833438C02Rik	1.201	1.48
Map3k19	1.199	1.86
Gm37334	1.197	1.7
Rtp4	1.194	2.33
Dennd2d	1.187	1.35
Gm2093	1.186	1.58
4933421O10Rik	1.185	1.93
Gm29123	1.185	1.54
Haao	1.183	2.36
Zfp729a	1.182	5
Gm47469	1.18	3.51
Snhg1	1.18	2.19
ENSMUSG00000120539	1.179	1.56
H2-Q4	1.174	1.5
ENSMUSG00000120802	1.166	1.42
4933433G15Rik	1.162	2.16
Gm44686	1.162	1.79
Nectin2	1.161	3.74
Atg10	1.159	4.46
Hmgn3	1.157	2.07
Dgki	1.153	1.52
Ddit3 - ENSMUSG00000025408	1.15	2.09
Nod1	1.149	4.16
Lypd6	1.149	1.65
ENSMUSG00000120045	1.148	2.04
Bcl6	1.148	1.7
Osm	1.148	1.68
Ubxn11	1.148	1.57
Ccnd2	1.146	2.19
ENSMUSG00000120154	1.14	1.33
2310010J17Rik	1.138	1.31
Junb	1.136	2.16
Nsl1	1.129	2.55
Gm47863	1.129	1.38
Snhg15	1.128	1.52
Gm10676	1.124	2.32
Ipcef1	1.123	5.22
Sgk1	1.12	3.4
4932422M17Rik	1.12	1.46
Gm10762	1.119	1.92
Catsper3	1.119	1.92
Gm42917	1.119	1.7
Cfap43	1.108	1.39
Hspa1a	1.106	1.59
Tbc1d22bos	1.105	1.35
Pole	1.1	1.43
Ctdspl	1.098	3.65
Akt3	1.098	2.6
Gm9484	1.098	1.52
Cenps	1.094	1.44
Tnfaip3	1.093	1.75
Eaf2	1.092	1.69
ENSMUSG00000120462	1.091	1.48
ENSMUSG00000120408	1.09	1.43
Platr29	1.088	1.56
1700001K23Rik	1.088	1.53
Gm30198	1.086	1.94
ENSMUSG00000119947	1.086	1.64
Zfand4	1.084	1.7
Tubb6	1.079	1.45
Zscan30	1.067	2.25
1810019N24Rik	1.067	1.93
Il1bos	1.056	1.53
Blm	1.055	2.41
Acvrl1	1.05	3.4
Gch1	1.048	1.49
Cited2	1.047	2.67
ENSMUSG00000120906	1.047	1.55
Gm34907	1.046	1.62
Wsb1	1.045	3
Synj2	1.043	3.42
Nox1	1.038	2.37
Cchcr1	1.037	1.9
Tagap	1.033	2.29
ENSMUSG00000120024	1.031	1.47
Fggy	1.03	4.05
Brip1	1.03	1.55
Nxpe3	1.024	3.01
Gramd3	1.021	3.02
ENSMUSG00000120734	1.021	1.61
Fhad1	1.02	3.22
Cry1	1.02	2.15
Gm43909	1.018	1.61
Sertad1	1.017	1.56
Slc66a1	1.015	3.47
Pvr	1.014	2.46
Lrfn3	1.014	1.35
Wwox	1.013	4.12
A630089N07Rik	1.011	2.87
Per1	1.01	1.88
Rcc1	1.008	2.78
Etaa1os	1.007	1.68
Plekho2	1.006	2.7
Optn	1.004	1.52
Smim35	1.002	1.37
Srgn	0.9971	2.01
Dusp10	0.9947	2.49
Plk3	0.9852	2.1
Taf13	0.983	2.22
ENSMUSG00000120665	0.982	1.64
Slc9a5	0.9815	1.37
ENSMUSG00000121211	0.9781	1.42
Kcnn4	0.978	1.49
Gm41611	0.9774	1.36
Sfi1	0.9753	2.68
ENSMUSG00000120261	0.975	1.57
D630045J12Rik	0.9741	1.83
Gm15912	0.9741	1.61
Tgif1	0.9734	2.31
Gm44788	0.9732	1.54
Gm49342	0.9723	3.92
Arf4os	0.9721	1.57
ENSMUSG00000120322	0.9667	1.36
Ptchd1	0.9606	1.61
ENSMUSG00000120931	0.9589	1.36
Ets2	0.9523	2.61
0610009L18Rik	0.952	1.62
4930595D18Rik	0.9518	1.97
Mapkapk2	0.9514	4.09
Gm30411	0.9509	1.86
Gm41804	0.947	2.56
Gm32031	0.9456	1.51
Gpr162	0.9407	1.46
Zc3h12a	0.9401	2.03
Stxbp4	0.9394	3.26
Smad6	0.9381	2.43
Evi2	0.9355	3.73
4930445E18Rik	0.9311	1.46
Chst11	0.9309	4.24
ENSMUSG00000120371	0.9303	1.44
Dnajb4	0.9272	2.19
5730405O15Rik	0.9238	1.56
Snhg5	0.9237	1.87
Gm29811	0.9231	1.69
Rrad	0.9198	1.9
9630010A21Rik	0.9196	1.36
Clic4	0.9186	2.23
A330023F24Rik	0.9175	3.4
Igsf8	0.9171	3.22
ENSMUSG00000120648	0.9165	1.53
Map4k1	0.9162	1.4
Rasal2	0.9141	4.56
Gm50211	0.9135	1.4
Alox5	0.9121	2.43
Klf12	0.9097	3.59
Gpr183	0.9087	2.75
Gm20721	0.905	2.55
Odc1	0.9027	1.61
Tagln2	0.8976	2.94
Insig1	0.8966	2.1
Tex30	0.8957	1.97
Ezh2	0.8929	2.99
Srgap3	0.8903	3.51
Nabp1	0.8897	1.83
Tmem154	0.8885	1.57
Gcnt2	0.8865	1.41
Nup210	0.8851	2.14
Oprm1	0.8809	3.04
Scarna2	0.879	1.79
Ada	0.879	1.38
Ppp1r10	0.8785	2.11
Afap1	0.8771	2.48
0610040B10Rik	0.8758	1.36
Zfp458	0.8713	1.95
Slc15a3	0.8712	3.7
A630072M18Rik	0.8712	1.6
ENSMUSG00000120580	0.8711	1.69
Tmem116	0.8647	1.73
Eid3	0.8624	1.31
Fgf13	0.8592	1.72
Sycp2l	0.858	1.4
Gm50399	0.8576	1.42
Myh10	0.8567	3.59
Mir142hg	0.8564	1.94
Prdm5	0.8555	2.16
Selenon	0.8549	2.63
Phospho1	0.8503	2.57
Slc25a33	0.849	1.78
2210408I21Rik	0.8486	1.8
Ifrd1	0.8478	1.86
Plpp1	0.8453	3.88
Pacsin1	0.8441	1.47
Nuak2	0.8416	1.76
Gm14546	0.8391	1.64
Ninj2	0.8382	1.31
Rabgef1	0.8354	2.69
Rab20	0.835	2.1
Phkg1	0.8323	2.11
F730043M19Rik	0.8316	1.41
Map3k15	0.83	2.12
A930024E05Rik	0.8298	1.54
Wdfy1	0.8293	4.05
Gm11805	0.8292	1.42
Megf11	0.8281	2.11
Plek	0.8272	3.18
Slc25a13	0.8243	3.01
Gpr18	0.8241	1.44
Pdia5	0.8235	3.71
Hmga2-ps1	0.818	2.88
Gm14321	0.8163	1.52
Cux2	0.8155	1.45
Stk38l	0.8141	3.22
Bex3	0.8107	1.33
Gdpd5	0.8106	1.77
ENSMUSG00000121114	0.8091	1.69
Ildr1	0.8073	1.61
Bcl2a1b	0.8063	1.86
Als2cl	0.8062	1.49
Epha2	0.806	1.9
Gm28041	0.8059	1.71
Ahdc1	0.805	3.1
P2rx1	0.8044	1.61
Arl5c	0.8029	1.44
Sesn2	0.8007	2.37
Ptpro	0.8001	2.05
Bik	0.7996	1.54
Prelid2	0.7963	3.02
Apbb2	0.795	3.01
Btg3	0.7944	1.31
Zfand5	0.7931	2.15
Mmp2	0.7926	2.86
Pirb	0.7908	1.77
Cd52	0.7898	1.71
Rab4a	0.7869	1.68
Cables1	0.7863	3.01
Gm5547	0.7859	1.33
Nrbf2	0.7836	1.73
Coq10b	0.7824	2.39
4921531C22Rik	0.7813	1.58
Sag	0.7781	1.38
Cadm1	0.7779	2.94
Pea15a	0.7763	2.68
Mdm1	0.7709	2.25
6330537M06Rik	0.7705	1.53
Adrb2	0.7701	1.87
Acaca	0.77	3.01
Gm14902	0.7691	1.58
Nfkbia	0.768	1.39
Cbx4	0.7651	2.05
Tnfsf13b	0.7642	2.97
Ppp1r13b	0.7596	3.35
Rnf19b	0.7587	2.07
H2-Ob	0.7564	1.79
Tspan7	0.7521	3.92
Txnl4a	0.7507	2.19
Crip1	0.7501	1.45
5031425F14Rik	0.7497	1.44
Gm4221	0.7496	1.74
Cenpf	0.7493	1.35
Lyplal1	0.7453	1.79
Kcnma1	0.7441	2.02
Bcl2	0.7441	1.53
B4galnt1	0.7382	2.02
Erc1	0.7377	1.56
Trmt10a	0.7372	1.86
Usb1	0.7369	1.74
Peli2	0.7345	3.77
Palld	0.7344	1.33
Csnk1g3	0.7342	3.19
Apbb3	0.7338	1.77
Nt5dc3	0.7333	2.45
Lpp	0.7321	4.01
Tbc1d4	0.7319	1.74
Mms22l	0.7307	2.34
Rel	0.7287	2.64
ENSMUSG00000121168	0.7276	1.61
Cnn2	0.7263	1.65
Spns2	0.723	2.77
Rnls	0.7218	2.6
Vps41	0.7218	2.19
Adamts16	0.7218	1.79
Rccd1	0.719	1.9
Arl5b	0.7138	1.95
Hnrnpdl	0.7124	3.22
Nlrp1c-ps - ENSMUSG00000121474	0.712	1.78
Sfmbt1	0.7114	2.94
Smim3	0.7104	1.36
Nfkbib	0.7098	1.8
Nfil3	0.7095	1.52
Gm12905	0.7063	2
Arrdc3	0.7059	1.44
4833418N02Rik	0.7054	1.47
Casp4	0.7053	1.41
Slc6a8	0.7051	1.64
4931428F04Rik	0.7035	1.49
Nova1	0.7034	2.91
Litaf	0.702	3
Anxa4	0.7017	1.93
Atp8b1	0.6998	1.53
Gm9929	0.6975	1.57
Ptp4a1 - ENSMUSG00000026064	0.697	1.79
Ctnnd2	0.6952	1.33
Cep43	0.6937	2.82
Tbpl1	0.6931	2.79
Tiparp	0.6919	1.82
Usp6nl	0.6891	2.94
Akap5	0.6872	1.67
Zfp536	0.687	1.57
Hic2	0.6856	1.39
Aim2	0.6811	3.08
Get3	0.6811	2.04
Tdrd3	0.6809	2.99
Ralgps2	0.6809	2.33
Grk3	0.6799	2.77
Mpv17l	0.6796	1.4
Stau2	0.679	3.12
Neurl1a	0.679	1.9
Nrep	0.6777	1.73
Gm15441	0.6767	1.61
Clip1	0.6738	3.73
Rad51b	0.6729	2.14
Npnt	0.6729	1.56
Trp53inp2	0.6702	1.41
Tnfrsf23	0.669	1.45
Depdc7	0.6687	2.12
Gm13431	0.6679	1.48
Tmx4	0.6677	2.77
Tbc1d1	0.6654	2.84
Zfp827	0.6654	2.75
Spns3	0.6625	1.46
Zfp69	0.6618	2.68
Wdr25	0.6602	2.03
Ier5	0.6601	2.18
Jup	0.6599	2.2
Ehhadh	0.659	1.71
Rhbdf2	0.6578	1.38
Zgrf1	0.6557	1.49
Snx8	0.6553	2.81
Cand2	0.6548	1.88
2410002F23Rik	0.6529	1.93
Aph1c	0.652	1.32
Hspa12a	0.6513	2.53
Tspan13	0.6498	3.26
Txnrd1	0.6487	3.51
Fahd2a	0.6458	1.53
Klc1	0.6439	2.57
Spata7	0.6421	1.73
Gpd1	0.64	1.38
Lamb2	0.6396	1.46
Ccl6	0.6385	2.3
Naalad2	0.6384	3.43
Fam107b	0.6376	2.99
Gtf2ird1	0.6345	2.08
Arhgap24	0.6333	1.54
Atf6	0.6319	3.4
Gsdme	0.6298	2.5
Slc16a10	0.6295	3.04
Relt	0.6279	1.52
Rasa4	0.6256	2.85
Evi2a	0.6248	2.06
Gna12	0.6235	2.77
Rapgef5	0.6235	2.32
2900026A02Rik	0.623	2.47
Eya4	0.6212	1.72
Rhoh	0.6209	2.45
Lonrf3	0.6199	2.28
ENSMUSG00000121479	0.6197	1.72
Azin1	0.6157	2.98
Gins1	0.6153	1.7
Taf1d	0.6134	2.42
Slc7a5	0.6123	2.15
Nos1ap	0.6117	1.49
Rhoc	0.6115	1.61
Ccdc149	0.6115	1.39
Arap2	0.6113	1.58
Card11	0.6099	1.38
Pfkfb3	0.6086	3.02
Tob2	0.6051	2.1
Dync2i1	0.6038	1.86
Pnp	0.6026	2.09
Vopp1	0.6005	1.57
Rnf144b	0.5995	2.21
Ebpl	0.5993	1.62
Focad	0.5979	2.7
Klhl6	0.5942	2.68
Slbp	0.5939	2.28
Ppp1r21	0.5923	2.44
Arsg	0.5914	1.67
Ksr1	0.5905	2.19
Nfkbie	0.5903	1.73
Samsn1	0.5886	2.43
Tnfrsf21	0.5877	3.47
Nsun6	0.5871	1.74
Wdr6	0.587	1.53
Coro7	0.5863	2.75
Cacna1d	0.5863	1.78
Fam167b	0.5846	1.54
Atosa	0.584	2.05
Myo1e	0.5832	1.95
Slc16a1	0.5828	1.36
Kcnk13	0.5823	2.99
Gt(ROSA)26Sor	0.5816	1.42
Tasl	0.5813	2.32
St7	0.5812	2.75
Lbh	0.5804	2.07
Ell	0.5802	1.66
Ust	0.5795	2.28
C9orf72	0.5774	2.25
Pyroxd2	0.5762	1.4
Mtmr10	0.5759	1.98
Arf4	0.5739	2.31
Fus	0.5738	2.77
Dclk2	0.5733	1.31
Tspan18	0.5716	1.96
3110009E18Rik	0.5697	2
Gm42962	0.5695	1.71
2610020C07Rik	0.5682	1.59
Hmgb2	0.5681	1.76
Garnl3	0.5681	1.74
Tsen2	0.5667	1.92
Nudt4	0.5657	2.04
Niban2	0.5654	2.68
Hrh2	0.5642	1.58
Rtn1	0.5629	2.99
Klf6	0.5624	1.49
Setd3	0.5617	3.23
Ciapin1	0.5615	2.09
5330406M23Rik	0.5592	1.81
Lrrc8d	0.559	2.58
Rbm3	0.5589	1.9
Naa20	0.5565	2.6
Nlrp3	0.5563	1.69
Cyria	0.5518	3.06
Ddx60	0.5518	1.72
Ccnl1	0.5512	1.99
Vamp1	0.5499	2.37
Btg1	0.5494	1.78
Pola2	0.5475	1.79
Siah2	0.5469	1.45
Usp35	0.5462	1.92
Chka	0.5448	1.68
Plxdc2	0.5447	2.15
Nlrp1b	0.5447	1.85
Srsf5	0.5438	1.71
Cux1	0.5412	3.42
Dusp16	0.5395	1.94
Tec	0.5389	2.85
Ctnnbip1	0.5388	1.8
Zfp40	0.5386	2.11
Ptprm	0.535	1.73
Uhrf1bp1	0.5345	2.47
Pacs1	0.5344	2.94
Lncpint	0.5333	2.05
Pard3b	0.5318	1.47
Ssh3	0.5313	2.07
Isyna1	0.5307	1.31
Ppox	0.5304	1.92
Disc1	0.5298	2.18
Taf7	0.5287	1.86
Cdh23	0.5279	1.72
Tmcc3	0.5275	2.47
Ttc7b	0.5271	1.92
Gm16599	0.5257	2.25
Mad1l1	0.5254	2.34
Magi3	0.5249	2.51
Snx29	0.5246	1.69
Rgs3	0.5244	1.78
Zfp697	0.5237	1.92
Gm15283	0.5216	1.41
2310022B05Rik	0.5202	1.52
Lrrc28	0.5193	1.69
Trp53bp2	0.5187	2.81
Gvin1	0.5187	1.7
Rcan1	0.5182	2.6
Pld2	0.5175	2.53
Map2k6	0.517	1.33
Slc31a1	0.5157	1.87
Stom	0.515	1.34
Mta3	0.5143	2.25
Nlrp1c-ps - ENSMUSG00000092528	0.5143	1.62
Il1rl2	0.5142	2.4
Zswim5	0.5142	1.71
Hivep1	0.5138	1.97
Gde1	0.5123	1.31
Chd2	0.5113	1.73
Gspt1	0.511	2.25
Zfand3	0.5109	2.33
Dennd2c	0.5109	2.17
Mrtfa	0.5097	2.05
Dcakd	0.5086	2.15
Tspyl2	0.508	2.07
Lrrc75a	0.5077	1.67
Ints7	0.507	1.93
P2ry10b	0.5062	1.84
Tifa	0.5058	1.7
Smad7	0.5041	2.01
Tram2	0.5039	1.69
Pilra	0.5029	1.58
Ttpal	0.5027	1.74
Kdm6b	0.5	1.33
Slc9a1	0.4998	2.59
Dnajb1	0.4992	1.79
Rnf24	0.4991	1.34
Snx13	0.4985	2.51
Eml4	0.4979	2.94
Acsl4	0.496	2.75
Dlg4	0.4951	1.96
Haus7	0.4949	1.3
Plcl1	0.4943	2.68
Syngap1	0.4941	1.65
Tbc1d10a	0.4928	1.8
Arhgap25	0.4917	2.52
Soat1	0.4916	1.97
Gm46367	0.4907	1.61
Rbm38	0.4897	1.68
Cep290	0.4882	2.01
Gtdc1	0.4827	2.44
Tbc1d31	0.4814	1.34
Map3k14	0.4813	1.95
Dgkd	0.4804	1.86
Serac1	0.479	1.59
Phtf2	0.4788	2.3
Adk	0.4784	1.3
D130040H23Rik	0.4781	1.84
Cdk2	0.4775	1.35
Mat2a	0.4773	2.51
Gcnt1	0.4765	2.18
Vmp1	0.4758	1.96
Slc15a4	0.4752	1.77
Apba1	0.4748	1.8
Pcna	0.4744	1.41
Msi2	0.4743	2.09
Gnaq	0.4738	2.39
Fads1	0.4723	1.32
Sncaip	0.4722	2.06
Cfap20	0.472	2.24
Ninl	0.4719	1.81
Tmem156	0.4719	1.4
Prune2	0.4713	1.69
Ppp1r12b	0.4708	2.3
Eepd1	0.4708	1.83
Nubpl	0.4686	2.05
Sde2	0.4664	1.37
Homer1	0.4659	2.24
Ppp2r1b	0.4642	1.96
Clec16a	0.4638	1.88
Fam220a - ENSMUSG00000083012	0.463	1.73
Myo1b	0.4623	2.12
Ano10	0.4611	2.17
Tmem18	0.4608	1.62
Rufy3	0.4596	2.42
Srl	0.4591	1.44
Padi2	0.4574	2.85
4930517O19Rik	0.456	2.31
1700001C19Rik	0.456	1.41
Ptbp2	0.4553	1.64
Dipk1a	0.4546	1.74
Arhgap4	0.4544	2.68
Zfp810	0.4536	1.39
Ipo9	0.4534	2.6
Rras2	0.4534	1.47
Atp7a	0.4531	2.68
Zfp516	0.4523	2.17
Capn2	0.4521	1.36
Stk17b	0.4513	1.53
Tle4	0.4511	2.2
A930015D03Rik	0.4507	2.03
Rin2	0.4505	1.34
Kcnj2	0.4497	1.75
Shb	0.4494	1.72
Sub1	0.4484	2.24
Tfeb	0.4469	1.98
Cdc42se2	0.4459	2.2
Cdc14a	0.4452	1.95
Numb	0.444	2.03
Acox3	0.4438	2.51
Fbxw7	0.4438	2.06
Elk3	0.4437	2.6
Cd86	0.4437	1.98
Pvt1	0.4437	1.58
Asah2	0.4434	1.72
Pak1	0.4431	2.35
B4galt5	0.4407	1.48
Xylt2	0.4403	1.31
Rab43	0.4402	2.58
Zfp395	0.4389	2.23
Rmc1	0.4385	1.6
Pdlim5	0.4383	1.61
Fnip1	0.4382	1.7
Nf1	0.4375	2.11
Dlg3	0.4374	1.32
Smad3	0.4346	1.92
Mast2	0.4346	1.66
Atp6v1a	0.4342	1.41
Rbm5	0.4332	2.1
Large1	0.4325	1.95
Wdr91	0.4323	1.77
Nek7	0.4322	1.99
Usp12	0.432	2.58
Tspan9	0.4313	1.53
Myo1g	0.4308	1.86
Map4	0.4288	2.21
Ppp1r9a	0.4276	2.16
Map2k3	0.4273	1.57
Rab8b	0.4271	2.44
Donson	0.4271	1.37
Tbc1d16	0.4268	1.89
Nbeal2	0.4256	1.38
Uvrag	0.4247	2.17
Shfl	0.4245	1.38
Zfp609	0.4232	2.34
Lat2	0.4229	1.74
Rybp	0.4219	1.78
Nptn	0.4215	2.15
Srsf7	0.4199	1.95
Ptpra	0.4198	2.03
Denn2b	0.4184	1.47
Hmces	0.4176	1.62
Setdb2	0.4159	1.33
Fam222b	0.4154	1.86
Slc44a2	0.4134	1.89
Gls	0.4125	1.86
Baz2b	0.4112	1.79
Traf3	0.4112	1.63
Ttc28	0.4112	1.55
Etf1	0.4111	2.25
Jam3	0.4111	1.46
Cyb561a3	0.4109	1.67
Ern1	0.4084	1.96
Mknk2	0.4083	1.36
Dusp3	0.4082	2.05
Rheb	0.408	2.31
Pik3cb	0.4079	2.37
Lims1	0.4077	1.73
Osbpl8	0.4066	2.03
Hnrnph1	0.4063	1.95
Tcf7l2	0.4062	1.84
Cnnm4	0.4062	1.49
Fnbp4	0.406	1.72
Piezo1	0.4054	1.87
Mospd2	0.4053	1.86
Fbxw11	0.4051	2.23
Mapre2	0.405	1.94
Vps37b	0.4043	1.8
Bag3	0.4042	1.53
Pde7a	0.4041	1.66
Impact	0.4039	1.89
Kras	0.4034	1.86
Cd276	0.4032	1.58
Ube2h	0.4023	1.88
Tgm2	0.4017	1.92
Prkch	0.4006	1.45
Saysd1	0.4004	1.32
Napa	0.4	1.64
Mmd	0.3991	1.45
Enoph1	0.3971	1.46
Ctnnal1	0.3968	1.46
Exoc4	0.3967	1.89
Tm7sf3	0.3965	1.95
Drg1	0.3955	1.64
Cep85l	0.3953	1.55
Hhex	0.3952	1.76
Aifm1	0.3951	1.79
Rubcnl	0.3949	1.52
Gab2	0.3948	1.96
Spop	0.3937	2.15
Gk	0.3928	1.44
Lin9	0.3922	1.35
Zc3h7a	0.3917	1.86
Dera	0.3912	1.79
Mpdu1	0.3905	1.45
Slc24a3	0.3901	1.8
Tnip2	0.3899	1.47
Alg13	0.389	1.64
Plekhm2	0.3874	1.44
Abhd5	0.3873	1.55
Eps8	0.3866	1.34
Hmgcl	0.3865	1.95
Zdhhc13	0.386	1.35
1600020E01Rik	0.3858	1.46
Ppp1cc	0.3848	2.13
Smg6	0.3844	1.52
Edem1	0.3832	2.35
Rasgrp3	0.3825	1.46
Ap5m1	0.3822	1.72
Ints2	0.3817	1.32
Nfkbil1	0.3816	1.54
Gm49797	0.3806	1.8
Sh3bp5	0.3799	1.53
Rsrc1	0.3793	2.02
Dnmt3a	0.3791	1.96
Rab3ip	0.3791	1.34
Ripk2	0.3791	1.34
Herc1	0.3784	1.76
Btbd9	0.3782	1.89
Clip2	0.3781	2.35
Arl15	0.378	1.64
Cntln	0.378	1.57
Znrf3	0.3775	1.5
Tmem131l	0.3772	1.98
Pik3r6	0.3769	1.63
Sat1	0.3766	1.69
Abi3	0.3765	2.23
Ppp1r2	0.3765	1.59
Sdcbp	0.3755	1.64
Prdm15	0.3755	1.49
Eif4a2	0.3733	2.37
Gnas	0.3733	1.43
Tpcn2	0.3726	1.3
Ctsc	0.3723	1.58
Prkcb	0.3723	1.34
Foxo1	0.3717	1.87
Slc38a2	0.3715	1.67
Slc22a5	0.3712	1.52
Pphln1	0.3704	1.97
Acer3	0.3698	2.16
Tifab	0.3697	1.98
Paxbp1	0.3687	1.59
Map3k5	0.3685	1.96
Cd180	0.3684	1.48
Micos10	0.3682	2.03
Myef2	0.368	1.32
Ddx39b	0.3679	1.72
Bcl7a	0.3677	1.54
Slc9a7	0.3674	1.64
Als2	0.367	1.96
Dennd4a	0.3669	1.74
Orai2	0.3667	1.94
Lin52	0.3665	1.46
Acvr1	0.3661	1.53
Cblb	0.3657	2.01
Rapgef6	0.3654	2.08
Phf14	0.3654	1.7
Sppl3	0.3652	1.59
Med13l	0.3646	1.59
Sil1	0.3645	1.87
Malat1	0.3645	1.64
Cacnb2	0.3637	1.64
Mroh1	0.3626	1.64
Nfxl1	0.3624	1.53
Srsf3	0.3622	2.05
B3gnt2	0.3619	1.52
Abr	0.3619	1.47
Ston2	0.3605	1.54
Lrp12	0.3597	1.51
Arhgap9	0.3594	1.42
Tra2b	0.3591	1.61
Npc1	0.3587	2.34
Gramd4	0.3573	1.43
Smyd3	0.3571	1.4
Ppm1h	0.357	2.11
Ubr5	0.3567	2.2
Abcb1b	0.3562	1.93
Arhgef40	0.3559	1.78
Prpf39	0.3553	1.53
Smc5	0.3545	1.5
Col27a1	0.3544	1.41
Inpp5a	0.3539	1.65
Ints6l	0.3536	1.34
Ewsr1	0.3528	1.68
Znrf1	0.3527	1.44
Glce	0.3526	1.38
Dock9	0.3522	1.62
Sergef	0.3521	1.37
Rbpms	0.3511	1.64
Tbc1d22a	0.351	1.33
Fbxo33	0.3505	1.3
Fam135a	0.3502	1.36
Suclg2	0.3496	1.72
Tnfrsf11a	0.3495	2.11
Hnrnpl	0.3494	1.71
Elf2	0.3471	1.96
Unk	0.347	1.6
Sh3kbp1	0.3467	2.11
Yaf2	0.3461	1.74
Rps6kc1	0.346	1.4
Galnt7	0.3452	1.86
Tent5c	0.3444	1.35
Atp6v1c1	0.3441	1.86
Zfp131	0.344	1.72
H3f3a	0.3435	1.46
Pde3b	0.3432	1.33
Wdfy4	0.3429	1.62
Fam53a	0.3419	1.55
Faf1	0.3415	1.98
Cpne1	0.3413	1.93
Fars2	0.3411	1.64
Chd7	0.3405	1.86
Hipk2	0.3403	1.86
Cln8	0.3403	1.72
Ercc5	0.3403	1.41
Fbxo34	0.3399	1.47
Srbd1	0.3399	1.39
Pals2	0.3398	1.91
Klhl7	0.3394	1.64
Cryl1	0.3387	1.32
Mtf2	0.3357	1.43
Mtmr12	0.335	1.5
Med14	0.3342	1.34
Babam2	0.3333	1.45
Jmjd1c	0.3331	1.54
Pgm2l1	0.3322	1.47
Zfp407	0.3319	1.48
Disp1	0.3316	1.39
Snx30	0.3301	1.52
Apbb1ip	0.33	1.53
Rps6ka5	0.3295	1.46
Dip2c	0.3288	1.44
Osgep	0.3277	1.35
Ccnl2	0.3276	1.87
Sae1	0.3274	1.62
Dhx32	0.3263	1.73
Pitpnc1	0.3242	1.34
Phf21a	0.3239	1.62
Rngtt	0.3236	1.47
Uri1	0.3235	1.31
Rab31	0.323	1.53
Gm31166	0.3224	1.4
Stx8	0.3216	1.49
St3gal2	0.3214	1.49
Ube2w	0.3212	1.52
Arid1b	0.3211	1.56
Smurf1	0.3209	1.74
Smurf2	0.3209	1.38
Nxf1	0.3203	1.51
Stk19	0.3195	1.33
Stimate	0.3194	1.72
Clint1	0.319	2.03
Ehd4	0.319	1.34
Brwd1	0.3178	1.49
Skap2	0.3173	1.67
Ccng2	0.3162	1.59
Susd6	0.3162	1.58
Adgre1	0.3161	1.68
Tbxas1	0.3155	1.53
Strn3	0.3142	1.44
Fbxl17	0.3129	1.58
Eipr1	0.3129	1.38
N4bp2	0.3122	1.58
Atp6v0d1	0.3118	1.6
Memo1	0.3114	1.74
Srpk2	0.3108	1.37
Trp53	0.3104	1.38
Fbxl5	0.3103	1.87
Kdm2b	0.31	1.41
Dhx9	0.31	1.36
Dyrk1a	0.3089	1.54
Pi4ka	0.308	1.8
Ascc3	0.308	1.76
Raly	0.3068	1.91
Gxylt1	0.3068	1.66
Peli1	0.306	1.37
Phkb	0.3054	1.38
Slc4a7	0.3044	1.54
Nktr	0.3042	1.82
Coq2	0.3042	1.47
Arntl	0.3038	1.33
Rbm25	0.3021	1.31
Psme4	0.3018	1.43
Atxn7l1	0.2995	1.72
Tet3	0.2984	1.48
Tsc22d2	0.2984	1.41
Rai1	0.2977	1.39
Foxp1	0.2973	1.35
Morrbid	0.2966	1.35
Lrrfip1	0.2951	1.55
Inpp5b	0.295	1.47
Pspc1	0.2949	1.63
Cdyl	0.2946	1.57
Ankrd10	0.2932	1.37
Mtmr3	0.2924	1.39
Atxn2	0.2918	1.4
Skil	0.2909	1.58
Ppp2r5e	0.2906	1.61
Sik3	0.2904	1.7
Rnf2	0.2901	1.64
Ppm1b	0.2899	1.62
Dnajc18	0.2883	1.56
Ski	0.2883	1.37
Ppp4r1l-ps - ENSMUSG00000121504	0.2878	1.41
Hs2st1	0.2871	1.49
Rap1a	0.2859	1.32
Ptprc	0.2857	1.78
Sumf1	0.2854	1.79
Cyth3	0.2842	1.46
Tcf20	0.2838	1.64
Dennd1b	0.2834	1.34
Snx10	0.2828	1.36
Efhd2	0.2823	1.45
Ccr5	0.2821	1.41
Hnrnpd	0.2816	1.47
Spred1	0.2809	1.36
Clcn5	0.2807	1.4
Smarca2	0.2806	1.54
Tbl1x	0.2805	1.64
Ubac2	0.2797	1.5
Ifnar2	0.2796	1.38
Wdr20	0.2779	1.35
Galnt12	0.2776	1.32
Eefsec	0.2775	1.48
Taf15	0.2775	1.3
Cep192	0.277	1.59
Gfpt1	0.2764	1.42
Hmbox1	0.2763	1.42
Arfip1	0.2761	1.31
Oxr1	0.2738	1.5
Dock2	0.271	1.33
Stat5b	0.2701	1.31
Plcg2	0.2699	1.35
Tmem50b	0.2682	1.49
Adgrl2	0.2675	1.35
Ctps2	0.2674	1.41
Rab3gap2	0.2671	1.65
Snd1	0.2652	1.46
Hpcal1	0.2633	1.44
Nnt - ENSMUSG00000025453	0.2632	1.46
Hpf1	0.2628	1.31
Retreg1	0.2627	1.37
Lcor	0.2611	1.32
Crybg3	0.2609	1.37
Cd53	0.2596	1.5
Zfp277	0.2582	1.59
Elf1	0.258	1.61
Rcor1	0.2556	1.35
Srsf11	0.2542	1.36
Macf1	0.2534	1.47
Rnf115	0.2525	1.33
Atxn10	0.2505	1.44
Atp8a2	-6.963	9.36
Cldn34c1	-5.777	5.04
Zfp125	-5.733	4.61
Gm19716	-5.605	4.99
Mpp7	-5.515	7.33
ENSMUSG00000121318	-5.337	3.99
Gm32687	-5.174	3.92
Gm13274	-4.815	2.68
1700030C10Rik - ENSMUSG00000099759	-4.809	3.12
4930481A15Rik	-4.553	2.24
Gm10037	-4.498	4.71
Gm43821	-4.479	7.85
ENSMUSG00000120963	-4.257	1.49
Fgf2	-4.118	4.93
Ifi204	-3.828	2.14
2610035D17Rik	-3.717	1.89
Pde2a	-3.593	4.16
Ifi213	-3.593	3.65
Unc5a	-3.581	4.25
Ppfia4	-3.578	1.44
Gm20559	-3.57	3.29
ENSMUSG00000120221	-3.554	3.68
ENSMUSG00000120167	-3.518	2.01
Samd4	-3.445	4.16
Naip3-ps1	-3.297	4.12
Gm42722	-3.114	2.01
Abcc1	-3.083	1.47
Enpp5	-2.94	2.88
C130046K22Rik	-2.897	4.63
Gm20707	-2.841	1.52
Gm13241	-2.82	1.34
Enpp4	-2.687	2.11
Tubb2b	-2.653	1.79
Copz2	-2.639	4.43
Stpg1	-2.575	3.57
Fbln1	-2.549	2.94
Btbd11	-2.479	3.25
Gm40916	-2.443	2.17
Igsf9	-2.432	3.59
Zc2hc1a	-2.423	4.46
Tmem221	-2.39	2.05
Pde10a	-2.386	2.44
Gm9796	-2.349	2.87
ENSMUSG00000121092	-2.347	2.15
Dact3	-2.347	1.37
Gm26641	-2.316	2.25
Adssl1	-2.308	1.68
Pcp4	-2.252	2.15
Kitl	-2.248	1.39
Arhgef5	-2.245	1.96
Arhgap10	-2.234	2.27
Gm3055	-2.194	3.01
Samd9l	-2.192	2.51
C5ar2	-2.152	1.3
C030034L19Rik	-2.148	3.22
Gm10521	-2.134	3.4
Cyp46a1	-2.101	2.29
Kcnk1	-2.1	2.32
Ifi209	-2.074	2.39
Aoah	-2.072	1.65
Sec16b	-2.071	3.56
Gm37317	-2.05	1.91
Gm15931	-2.036	1.57
Gm45837	-2.027	4.93
Akr1e1	-1.964	1.32
Pglyrp1	-1.962	2.3
Ang	-1.938	5.59
Trps1	-1.894	4.61
Lrrc4b	-1.884	1.79
Gm15510	-1.883	1.72
Plscr1	-1.875	2.02
Gm10874	-1.871	2.67
Ptpn14	-1.861	2.85
Gm42944	-1.849	2.26
4930447K03Rik	-1.837	2.85
Dcdc2b	-1.836	2.85
Gm9873	-1.798	1.96
Treml2	-1.796	1.67
Rxrg	-1.793	1.87
Gm32633	-1.79	1.91
Fgfbp3	-1.785	1.87
Rpl29	-1.764	3.43
S1pr1	-1.762	2.59
Gm35572	-1.757	1.57
Scd1	-1.753	2.75
Amer2	-1.732	2.77
Cyb5r1	-1.723	2.2
Lilra5	-1.709	1.41
Rasgrf2	-1.701	4.96
Asgr2	-1.697	1.42
4930525G20Rik	-1.684	2.26
Trim30c	-1.679	4.05
Map7d3	-1.678	1.47
Pbx4	-1.663	1.33
Ulk4	-1.632	1.73
Ccdc192	-1.619	1.64
Gm46440	-1.613	2.45
Ncan	-1.595	1.72
Ica1	-1.582	3.07
Zfp507	-1.578	2.32
Tmem150b	-1.571	2.34
Peg3	-1.571	1.62
Gm26782	-1.564	4.06
Rnf17	-1.564	2.15
Zfp862-ps	-1.558	5.77
Abhd14b	-1.554	2.93
2900052N01Rik	-1.541	1.61
Lims2	-1.54	1.76
ENSMUSG00000095742	-1.538	1.47
Gm4835	-1.533	1.97
Cep85	-1.529	5.11
Cfap126	-1.527	2.44
Niban1	-1.518	1.77
Gm9794	-1.515	1.67
Gm45449	-1.513	1.53
Rnase6	-1.511	2.99
Abcg3	-1.509	4.25
Numbl	-1.497	1.71
Etnppl	-1.495	2.16
Slc25a21	-1.493	2.17
Agt	-1.478	2.3
Ppdpf	-1.477	1.66
Gm7644	-1.472	2.51
Gm4951	-1.47	1.33
Olfml2b	-1.469	4.74
Fam171b	-1.463	2.35
Stxbp6	-1.461	3.06
Tubb2a	-1.461	2.05
Tmem38a	-1.446	1.78
Mt3	-1.441	2.11
Fam20c	-1.433	2.15
Clec4a1	-1.432	1.79
Mill2	-1.431	2.45
Zfp984	-1.424	1.69
Acsf2	-1.412	4.47
Mdfi	-1.411	3.31
Tmigd3	-1.411	1.89
Tril	-1.41	2.03
6430590A07Rik	-1.408	2.68
Ccnb1ip1	-1.397	3.26
Nap1l5	-1.388	2.11
Gnai1	-1.383	1.68
Gm48099	-1.372	1.99
Slc25a54	-1.371	1.69
9330111N05Rik	-1.365	1.49
Gjc3	-1.359	2.17
Lrp11	-1.353	1.58
F11r	-1.352	6.11
Acss2	-1.352	2.62
Sh3bgrl3	-1.35	2.51
Gm54867	-1.343	2.68
Rpph1	-1.337	2.01
Sparcl1	-1.329	3.22
Aldoc	-1.328	2.34
Cav1	-1.327	1.95
Fam107a	-1.325	1.63
Clu	-1.32	2.11
1500026H17Rik	-1.318	1.84
Osbp2	-1.317	1.58
Tnfrsf22	-1.312	2.05
Lpar1	-1.31	1.47
ENSMUSG00000120319	-1.308	2
Dio2	-1.306	2.12
Psmg4	-1.294	2.32
Nudt6	-1.289	4.12
Sult1a1	-1.284	1.89
Cldn11	-1.275	2
Cryab	-1.274	2.07
Nipal3	-1.273	4.96
Nfasc	-1.272	2.87
Clip3	-1.271	1.95
Dusp23	-1.271	1.86
Gm2415	-1.265	2.42
Ndrg1	-1.265	1.96
Tmem47	-1.261	2.33
Gfod1	-1.261	1.79
Slc1a2	-1.251	3.46
Bicd1	-1.251	1.97
Jph3	-1.248	2.21
Zfp493	-1.238	2.46
Smo	-1.234	5.22
Ecscr	-1.234	5.22
ENSMUSG00000120076	-1.234	1.33
Atp1a2	-1.23	2.95
Ajuba	-1.227	2.12
Zfp521	-1.224	2.87
Acsbg1	-1.221	1.89
Gm10125	-1.22	2.51
Klf9	-1.219	1.97
Gpr37l1	-1.21	1.41
Atp1b2	-1.204	2.25
Rps4l	-1.201	2.5
Ppargc1a	-1.2	1.83
Pfkp	-1.198	2.25
Mlc1	-1.196	1.82
Cntn2	-1.196	1.68
Map1b	-1.194	1.87
Postn	-1.193	1.55
Mir6236	-1.187	1.8
Gm12239	-1.185	2.15
Soga3	-1.185	1.43
Rimklb	-1.181	1.37
Clcf1	-1.177	3.72
Cyp2j9	-1.172	1.89
Adgre4	-1.17	2.28
Slitrk2	-1.169	1.55
Gm20045	-1.163	2.68
Dhcr24	-1.161	1.49
Rac3	-1.155	1.92
Sox2	-1.152	1.41
Pla2g7	-1.145	2.44
ENSMUSG00000120253	-1.145	1.46
Fam3c	-1.14	4.27
Ppp1r3e	-1.14	1.93
Cep72	-1.14	1.72
Kcnj9	-1.137	3.43
Aldh1a1	-1.129	1.96
Steap3	-1.125	1.37
Gm26965	-1.117	1.8
Scg3	-1.116	1.37
5830444B04Rik	-1.115	1.97
Gm34121	-1.115	1.51
1190007I07Rik	-1.112	2.01
Gbp7	-1.111	2.02
Adgrb1	-1.108	1.42
Gjb6	-1.107	1.41
Hepacam	-1.107	1.31
Rps23	-1.106	1.64
Tek	-1.103	2.05
Stk39	-1.099	1.62
Klhl12	-1.099	1.49
Cav2	-1.097	1.83
Gpr37	-1.092	1.52
Tmem88b	-1.084	1.37
Rcan3	-1.083	4.17
Slc7a2	-1.083	1.34
Gm47003	-1.082	1.65
H2ac15	-1.08	1.51
Wwtr1	-1.077	2.02
Rpl37a	-1.076	1.48
Rplp1	-1.075	1.61
ENSMUSG00000121195	-1.072	1.64
Gprc5b	-1.07	1.7
Mrc1	-1.069	1.64
Tatdn3	-1.067	2.93
Cspg5	-1.064	1.86
Cast	-1.051	3.56
Psmc3ip	-1.049	1.62
Mmp15	-1.048	1.32
Plekhg3	-1.044	1.46
Wnk2	-1.043	1.37
Zmat3	-1.041	2.77
Rpgrip1	-1.039	2.19
Lgi1	-1.039	1.8
Sall2	-1.038	3.31
Arsk	-1.034	4.16
Celsr2	-1.033	1.58
Rps29	-1.031	1.53
Zfp467	-1.029	4.7
Brd8dc	-1.029	1.46
Sspo	-1.028	1.45
Srp54a	-1.023	1.98
Tmod2	-1.022	2.41
Ccdc88c	-1.021	1.62
Slc24a2	-1.02	3.39
Slc22a8	-1.019	1.33
Mrpl53	-1.017	1.72
Gm15991	-1.012	1.38
Zfp366	-1.006	1.72
Hacd4	-1.003	2.96
Prdm16	-1.001	2.39
Rps21	-0.9987	1.46
Ttc23	-0.9972	2.46
Lrig3	-0.9943	1.93
Dbi	-0.9937	3.06
Myrf	-0.9904	1.42
Tle2	-0.9894	1.97
Epb41l4aos	-0.989	1.3
Map1a	-0.9875	1.78
Ptgds	-0.9856	1.57
Aqp4	-0.9841	2.67
4933433G19Rik	-0.9841	1.76
Meg3	-0.9841	1.38
Rps18	-0.9803	1.53
Maob	-0.9789	1.37
Slc6a1	-0.9788	1.79
Rpl34	-0.9709	2.03
4930488L21Rik	-0.9687	1.45
Zfp660	-0.9677	2.12
Nr1d1	-0.9664	1.9
H2-DMb1	-0.9662	1.69
Rplp2	-0.9636	1.54
Tmem254	-0.9634	1.62
Car2	-0.9632	2.15
Tmtc1	-0.961	1.9
Ndrg2	-0.9597	2.06
Plp1	-0.9588	2.02
Tnfrsf19	-0.9564	1.32
Rpl23a	-0.953	1.46
Mobp	-0.9522	1.47
Slc35d2	-0.9505	2.5
Tubb4a	-0.9496	1.76
Gja1	-0.9468	1.7
Iqgap1	-0.9464	1.54
Cpe	-0.9458	3.58
Gm2238	-0.9451	1.47
Kcnn2	-0.9449	1.55
ENSMUSG00000120859	-0.9448	1.33
Gm38843	-0.9423	2.43
Fau	-0.9395	1.66
Gm47754	-0.9362	3.22
Ntsr2	-0.9351	1.84
Igsf11	-0.9345	2.25
Kif21a	-0.9345	1.76
Rps27rt	-0.9315	1.47
Rpl13a	-0.9312	1.86
Eml2	-0.9306	1.37
Acsl6	-0.9282	1.49
Nln	-0.9272	2.99
1700086O06Rik	-0.9266	1.73
Rpl39	-0.9266	1.43
Nsdhl	-0.9257	3.54
Mboat1	-0.9234	2.51
Ermn	-0.9232	1.79
Prnp	-0.9219	2.02
Megf10	-0.9215	1.64
Gm10392	-0.9211	1.73
Nrxn2	-0.9195	1.77
Antxr1	-0.9189	1.71
A430033K04Rik	-0.918	2.75
Ablim1	-0.9174	3.03
Slc12a2	-0.9158	2.69
Ephb1	-0.9153	1.76
Tmem37	-0.9142	2.54
Foxp4	-0.9141	1.67
Abat	-0.9119	2.39
Gm15608	-0.9116	1.99
Ndufb10	-0.9098	2.42
Msr1	-0.9087	1.58
Hspa4l	-0.9079	1.86
Lrrtm3	-0.907	1.4
Egfr	-0.9069	1.65
Rps27	-0.9063	1.49
Map9	-0.9045	1.45
Gm48742	-0.9035	1.83
Mcur1	-0.9032	2.94
Ide	-0.9018	4
Jcad	-0.9002	1.42
9530062K07Rik	-0.9001	1.71
Slamf9	-0.8968	1.73
Gm27010	-0.8951	1.41
Ednrb	-0.8938	1.53
Slc25a47	-0.892	1.79
Rell1	-0.8897	2.37
Rpl18a	-0.8892	1.49
C1qb	-0.8887	1.34
Ugt8a	-0.8882	1.43
Ccdc28b	-0.8875	3.31
Acp1	-0.8865	2.6
Ddo	-0.8864	1.63
Snapc2	-0.8854	1.82
ENSMUSG00000120205	-0.8828	1.62
Rpl27	-0.8814	1.65
Zfp93	-0.8811	1.35
Rps12	-0.8807	1.42
Mettl1	-0.8799	1.71
Adora1	-0.8792	1.49
Rps24	-0.8792	1.46
Zfp879	-0.8775	1.4
Atp5k	-0.8773	2
Rpl37	-0.8757	1.44
Tead1	-0.8753	1.31
Gpm6a	-0.8726	1.92
Glp2r	-0.8719	1.33
Pink1	-0.8714	3.4
1700112D23Rik	-0.8714	1.4
Igdcc4	-0.8713	1.44
Dpm3	-0.8705	1.75
Elavl3	-0.8702	1.33
Iqcc	-0.8698	2.58
Dab2	-0.869	2.02
Mrpl35	-0.8651	1.83
Trim9	-0.8648	2.12
Mrpl34	-0.862	1.44
Zfp874a	-0.8604	1.93
Ntrk2	-0.8551	2.05
B3galt4	-0.8542	1.69
Gulp1	-0.8529	1.49
Rps26	-0.8526	1.36
Guca1a	-0.8519	1.35
Eif3k	-0.8486	2.41
Zfp85os	-0.8456	1.82
Rps10	-0.8444	1.57
Fth1	-0.8443	1.36
Ptn	-0.8432	2.6
Meis2	-0.8432	1.52
Adcyap1r1	-0.8429	1.73
Snrpf	-0.8425	1.72
Gapdh	-0.8419	1.41
Rpl23	-0.8414	1.53
Gm11368	-0.8398	1.51
Gm37306	-0.8376	1.76
Zfp78	-0.8372	1.84
Lgi4	-0.8371	1.66
Pstpip2	-0.837	2.35
Tgfbi	-0.8369	3.09
Bphl	-0.8368	2.57
Gm3164	-0.836	1.56
Sgcb	-0.8328	2.14
ENSMUSG00000121091	-0.8319	1.61
Mrpl27	-0.8311	1.87
Nfib	-0.8302	1.61
Gm13421	-0.8296	1.53
Rgs20	-0.8258	1.94
Tmem276	-0.8246	1.57
Lrig1	-0.8223	1.49
Dclk1	-0.8211	1.64
Rps7	-0.8202	1.38
Bmpr1b	-0.8197	1.95
Gria1	-0.8108	1.95
Astn1	-0.8103	1.48
Rps20	-0.8094	1.4
Tmem178b	-0.8082	2.13
Hk1os	-0.8065	1.35
Pkd2l2	-0.8022	1.45
Gm10069	-0.8014	1.84
Plekhg1	-0.8003	1.41
Slc14a1	-0.7999	1.33
Ccdc85c	-0.7994	2.5
Grin2b	-0.7994	1.44
Gnao1	-0.7975	2.11
Ndufa2	-0.7967	1.9
Gm26621	-0.7967	1.69
mt-Rnr1	-0.7952	1.86
Kxd1	-0.7947	1.33
Luzp2	-0.7941	2.19
Slc6a11	-0.7939	1.9
Zfp455	-0.7936	1.84
ENSMUSG00000120242	-0.7936	1.71
Abt1	-0.7914	1.73
Cd84	-0.7899	3.62
Dscaml1	-0.7895	1.33
Rpl31	-0.7868	1.53
Pcdh10	-0.7858	1.47
Ly6g6d	-0.7848	1.32
Ocln	-0.7843	2.1
Nudt2	-0.7843	1.33
Mkln1os	-0.7835	1.35
Txndc17	-0.7832	1.85
Wdr83os	-0.7831	1.85
Baalc	-0.7809	1.33
mt-Nd2	-0.7783	1.99
Dusp7	-0.7776	2.45
Slc4a4	-0.7762	2.78
Enpp2	-0.7755	2.14
Oscp1	-0.7747	1.6
Rps14	-0.7738	1.61
Nedd4	-0.7729	2.11
Zfp652os	-0.7725	1.69
Dph5	-0.769	2.07
Lsm5	-0.7665	1.8
Cep112	-0.7663	1.47
Psd2	-0.7658	1.36
Rps16	-0.7644	1.63
Mrpl52	-0.7594	1.39
Rpl30	-0.7589	1.41
Enah	-0.7587	1.8
Rpl22	-0.7587	1.59
Rpl36	-0.7548	1.69
Timp3	-0.7546	1.68
Rpl6	-0.7544	1.38
Gm19951	-0.7517	1.83
Pdgfd	-0.7512	1.6
Tspan32os	-0.7495	1.52
Dbndd2	-0.7494	1.42
St18	-0.7493	1.64
Tomm6	-0.749	1.6
Raph1	-0.7477	1.41
Rpl35a	-0.7471	1.46
Hsp90ab1	-0.7467	1.37
Nebl	-0.7426	2.05
Nckap1	-0.7426	1.93
Romo1	-0.7406	1.61
Hmgn5	-0.7398	1.35
Mycl	-0.7395	1.4
Bahcc1	-0.7387	1.35
Smpd3	-0.7382	1.44
Ncam2	-0.7379	2.01
Ppp1r16b	-0.737	1.39
Mrc2	-0.7354	1.89
Edil3	-0.7325	1.61
Rps2	-0.7323	2.37
Hcfc1r1	-0.7314	1.98
Rpl21	-0.7314	1.43
Rdm1	-0.7286	1.42
Cadm4	-0.7285	1.44
Ndufa3	-0.7278	1.47
Ttyh1	-0.7277	1.64
Pfdn6	-0.7275	1.61
Elavl4	-0.7272	1.33
Cox4i1	-0.7247	1.39
Use1	-0.7226	1.77
Tnfsf12	-0.7199	1.82
Cryba4	-0.7195	2.95
Mettl3	-0.7152	2.68
Magi1	-0.7146	2.38
Tpmt	-0.7143	1.43
Zfp691	-0.7121	2.74
Phactr3	-0.7115	1.38
Dusp12	-0.7111	2.51
Kazn	-0.71	1.54
Rbfox1	-0.7097	2.08
Fcgr3	-0.7095	2.06
Slamf1	-0.7091	1.39
Slc13a3	-0.7089	1.58
Ahsa1	-0.7077	1.35
Kcnq3	-0.7073	1.48
Flvcr1	-0.7072	2.37
Kctd12b	-0.7072	1.59
Cetn2	-0.7057	1.59
mt-Co1	-0.7052	1.89
Kirrel3	-0.7048	1.61
Tmsb15l	-0.7042	1.77
Ocel1	-0.7034	2.28
Rad23a	-0.7034	2.19
Galnt16	-0.7034	1.82
Gm26910	-0.6997	1.67
Ms4a6b	-0.6988	2.82
Ptprz1	-0.6987	1.96
Septin4	-0.6982	1.95
Amigo1	-0.6967	1.54
Rps15a	-0.6957	1.3
Stard8	-0.6953	3.19
Stab1	-0.6953	2.64
Ccdc124	-0.6952	1.98
Ptprd	-0.6932	2.11
Prxl2a	-0.693	1.75
Pex5l	-0.6924	1.38
Fam174c	-0.6923	1.51
Rrp9	-0.6921	1.35
Rpl11	-0.6909	1.31
Plcb1	-0.6907	1.86
S100b	-0.6905	1.45
Crybb1	-0.6901	2.88
Uqcrb	-0.6893	1.92
Ttc32	-0.6891	2.43
Tanc1	-0.6891	1.33
Acaa1a	-0.6887	1.79
Eid1	-0.6885	1.94
Cdkn1c	-0.6873	2.05
St3gal1	-0.6865	1.49
Marveld2	-0.6854	1.31
Zfp273	-0.6849	1.46
Gbp3	-0.6833	1.6
Irak3	-0.6833	1.5
Epb41l1	-0.6828	1.7
mt-Nd5	-0.6825	2.24
Nt5c	-0.6814	1.49
2610042L04Rik	-0.6786	1.31
Ndufa1	-0.6784	1.62
St6galnac3	-0.6782	1.79
Zfp933	-0.678	1.64
Prmt5	-0.6774	1.72
Gm13031	-0.6771	1.64
Adgrl3	-0.6763	1.79
Ggh	-0.6763	1.33
Rpl7	-0.6731	1.53
Psmb5	-0.6727	1.48
Mon1a	-0.6718	2.64
Atp5h	-0.6704	2.05
Kif13a	-0.6693	3.38
mt-Nd4	-0.6686	2.22
Zc4h2	-0.6677	1.36
Apod	-0.6676	1.34
Tbrg1	-0.6674	2.23
Creld2	-0.6673	1.96
Tmeff2	-0.6672	1.86
Ift122	-0.6669	1.73
Phb	-0.6663	1.53
Cnpy2	-0.6634	2.57
Coa8	-0.662	2.79
Acot11	-0.6615	1.42
Mrps33	-0.6603	2.28
Fyn	-0.6581	1.69
Pde8a	-0.6579	2.96
Zfp85	-0.6571	1.4
Snrpd2	-0.6555	1.58
Ms4a6c	-0.6544	1.33
Paqr8	-0.6537	1.64
Lamtor2	-0.6535	1.79
Rps9	-0.6514	1.35
Clec4a3	-0.6491	2.55
Siglece	-0.647	1.92
Gprasp2	-0.6462	1.46
Ggta1	-0.6455	3.23
Nqo2	-0.6454	1.73
Rn18s-rs5	-0.6447	1.72
Dpy19l3	-0.6444	2.47
Zfp637	-0.64	1.54
Coa6	-0.6395	1.4
Mfge8	-0.6391	1.54
Rsl1	-0.6377	2.01
ENSMUSG00000121141	-0.6367	2.3
Dhrs7	-0.6362	2.24
Trpm3	-0.6349	1.8
Bnip3	-0.6328	1.92
Mapkapk3	-0.6325	1.95
Eif4ebp1	-0.6323	1.38
Tnfsf10	-0.6308	1.36
Pfdn5	-0.6307	1.62
Nhsl1	-0.6303	1.52
Ncam1	-0.6291	1.77
Ptprt	-0.6255	1.35
Tbc1d7	-0.6247	1.35
Cox7a2	-0.624	1.92
Mal	-0.6234	1.34
Gpd1l	-0.6231	2.6
Ro60	-0.623	2.69
Gm26827	-0.6201	1.92
Efnb1	-0.6168	1.77
Iqsec2	-0.616	2.45
Mmp14	-0.6137	1.49
Eef1b2	-0.6126	1.31
Alyref2	-0.6119	1.52
Psme2b	-0.6111	1.7
Mrpl44	-0.6085	1.36
Trim36	-0.6067	3.08
E130311K13Rik	-0.6056	1.55
1700030K09Rik	-0.6047	2.19
Selenos	-0.6037	1.77
mt-Cytb	-0.6035	1.99
Rida	-0.6008	1.53
Lrrc51	-0.5993	1.64
Tmtc2	-0.599	1.68
Repin1	-0.5958	1.45
Rab6b	-0.5957	2.34
Irf2bp2	-0.5955	2.75
Cox7b	-0.5954	1.34
Gm15952	-0.5949	1.65
Rnaseh2c	-0.5941	1.84
Tmem35b	-0.5934	1.43
Gm46515	-0.5927	2.3
Tppp	-0.5912	2.96
Zadh2	-0.5903	2.68
Ttr	-0.5897	2.14
4931414P19Rik	-0.5891	1.86
Gm36738	-0.5881	1.61
Cops9	-0.5863	1.44
Ramac	-0.5839	2.05
Gpr160	-0.5835	1.74
Uap1	-0.5798	2.55
Ghdc	-0.5797	1.76
Rbbp8	-0.579	1.57
2300009A05Rik	-0.5785	1.36
Cherp	-0.5781	2.31
Cox17	-0.5781	1.77
Wdr45	-0.5776	1.63
Ebi3	-0.5774	1.91
Gm10524	-0.5773	1.47
B230219D22Rik	-0.5771	3.43
Lrriq3	-0.5762	1.39
Rad1	-0.5756	1.32
2810405F17Rik	-0.5744	1.41
Smpdl3a	-0.5735	1.33
Tnfsfm13	-0.5724	2.37
Pcdh9	-0.5721	1.76
Rsad1	-0.5717	1.61
Fcer1g	-0.5713	1.86
Ndufb9	-0.5712	1.82
Lrrc39	-0.5707	1.92
Cadm2	-0.5704	1.75
Apex1	-0.5702	1.32
B2m	-0.57	1.32
Tomm7	-0.5698	1.58
Scnm1	-0.5697	1.8
Exoc3	-0.5695	2.84
Rdh11	-0.5694	1.99
Gm3764	-0.5694	1.43
Frrs1	-0.5681	2.25
Itpripl2	-0.5681	1.67
Slc35b1	-0.5679	1.31
Pcdhga5	-0.5672	1.34
Prelid1	-0.5666	1.43
Arl6ip4	-0.565	1.59
Wdr89	-0.5648	1.64
Ccdc32	-0.5648	1.53
Rpl37rt	-0.564	1.77
Abhd3	-0.562	1.49
Ndufa6	-0.5619	1.3
Rabac1	-0.5613	2.01
Atp6v0b	-0.5609	2.75
Bloc1s2	-0.5598	2.09
Snrnp27	-0.5596	1.76
Abhd15	-0.5584	2.37
Rhno1	-0.5584	1.56
Ears2	-0.5583	1.64
Il16	-0.5575	3.06
Rorb	-0.5551	1.38
Stard3nl	-0.5549	2.85
Krba1	-0.5542	2.16
Zfp617	-0.5541	2.66
Syf2	-0.5532	2.07
Rdh5	-0.5512	2.11
Zfp398	-0.5505	2.76
Zfp791	-0.5505	1.34
Plxdc1	-0.5503	2.73
Zfp235	-0.5499	1.63
Gpsm3	-0.5473	2.03
Adgrb3	-0.5468	1.37
Cuta	-0.5466	1.59
Nckap5	-0.5454	1.47
Kdm1b	-0.5448	2.14
Gm45411	-0.5442	1.72
ENSMUSG00000119968	-0.5439	1.44
Pdia4	-0.5435	1.6
Fkbp9	-0.5413	1.59
mt-Rnr2	-0.5411	1.34
Dlg2	-0.5406	1.74
Nr1d2	-0.5398	1.71
Mras	-0.5397	1.66
BC065397	-0.5397	1.62
Gtpbp3	-0.5388	1.59
Hacl1	-0.5372	1.47
Rex1bd	-0.5365	1.36
Zbtb10	-0.5358	2.17
Pam16	-0.5356	1.5
Cbr1	-0.5352	1.68
Rab11fip5	-0.5339	2.64
Panx1	-0.5321	1.45
Ndufa13	-0.532	1.68
Ndufb3	-0.5313	2.04
Thra	-0.5312	1.85
Ndufs6	-0.5301	1.52
[truncated: 11,924 more rows]
