# Supplementary material for: P2RX7 regulates tauopathy progression via tau and mitochondria loading in extracellular vesicles
Source: Research Square preprint supplement (doi:10.21203/rs.3.rs-6771517/v1), 2025-06-23
Supplement: Supplementary file 8 [file ed67dd046d9a52865a7ffbbc.xlsx]

## Sheet: DE-Homeo
logFC	pct_1	pct_2	p_val_adj	auc	gene_names
0.7086	99.94	99.91	0	0.6994	Cdk8
0.6516	94.34	92.97	0	0.7343	Mir6236
0.5013	99.65	99.36	0	0.7398	Cst3
0.4978	99.65	99.54	0	0.735	Gphn
0.4728	99.91	99.73	0	0.7154	Lars2
0.441	100	100	0	0.7874	Rn18s-rs5
0.4156	91.54	93.04	0	0.6616	Il31ra
0.4094	99.96	99.9	0	0.6863	Cmss1
0.3999	97.16	97.28	0	0.6873	Tmsb4x
0.3924	91.02	91.37	0	0.659	Gm15564
0.3332	96.71	97.71	0	0.6721	Selplg
0.3121	96.24	97.12	0	0.655	C1qb
0.2915	84.78	88.61	6.754e-216	0.6298	Gm19951
0.2868	74.37	77.83	7.648e-158	0.6102	Hspa8
0.2858	97.15	98.26	3.554e-276	0.647	Selenop
0.2674	84.64	86.13	1.279e-141	0.6049	Fcrls
0.2632	93.84	95.73	5.777e-226	0.6329	Tmem119
0.2505	76.44	81.4	1.83e-138	0.6034	Hsp90ab1
0.2363	91.94	95.04	4.362e-203	0.626	C1qc
0.2298	77.78	84.31	2.053e-150	0.608	Fcgr3
0.2294	99.13	99.04	6.161e-203	0.6259	Actb
0.2176	86.17	90.64	1.613e-138	0.6038	Olfml3
0.2138	97.57	98.59	8.622e-216	0.6299	Sparc
0.2106	99.3	99.3	1.16e-119	0.5965	mt-Rnr2
0.21	96.31	97.84	1.022e-155	0.6102	C1qa
0.2003	99.21	99.51	0	0.6602	Csf1r
0.1991	99.35	99.22	1.415e-167	0.6143	Ctss
0.19	99.59	99.85	2.467e-153	0.6093	Camk1d
0.1777	98.1	98.69	1.1e-83	0.5805	mt-Rnr1
0.1775	99.42	99.49	8.093e-222	0.6317	Cx3cr1
0.1495	99.77	99.81	6.983e-214	0.6293	Hexb
0.1485	95.23	97.92	1.706e-113	0.5939	Psap
0.1474	87.49	93.65	9.55e-101	0.5884	Hsp90b1
0.1466	96.85	98.47	1.08e-135	0.6028	Laptm5
0.1464	92.88	96.51	1.74e-92	0.5847	B2m
0.1464	39.65	42.84	1.845e-17	0.5322	Rps23
0.1434	98.27	98.82	3.123e-90	0.5836	Ctsd
0.138	41.57	45.48	2.275e-16	0.5316	Rplp1
0.137	85.09	91.65	5.773e-80	0.5786	Eef1a1
0.1338	96.45	98.46	1.801e-116	0.5952	Itm2b
0.126	72.25	80.92	9.573e-48	0.5602	Fth1
0.1231	46.15	53.11	4.655e-14	0.5301	Rpl13a
0.1199	44.45	50.85	1.587e-12	0.528	Rps4x
0.1176	97.52	98.56	2.333e-75	0.5763	P2ry12
0.1096	75.24	84.22	4.367e-49	0.5612	Calr
0.1085	32.88	36.14	2.519e-06	0.5176	Rps29
0.106	42.72	50.4	1.841e-07	0.521	Rpl21
0.1034	37.62	43.54	4.104e-05	0.5164	Fau
0.1017	86.71	93.96	5.51e-74	0.5756	Jarid2
0.09928	95.4	98.23	1.69e-78	0.5779	Vsir
0.0992	59.29	69.99	1.138e-22	0.5404	Fcer1g
0.09058	28.36	32.23	0.0491	0.5083	Rpl37
0.0905	56.29	66.37	1.324e-15	0.533	Rpl4
0.08789	33.74	39.39	0.03117	0.5095	Rplp2
0.08749	81.42	90.68	1.917e-53	0.564	Pdia3
0.08701	38.42	45.69	0.008473	0.5114	Rpl18a
0.08688	25.31	28.04	0.03911	0.5082	Rpl37a
0.08278	28.83	33.04	0.1265	0.5071	Rpl26
0.08196	21.8	23.27	0.02172	0.5084	Rps3a1
0.08101	26.16	29.78	0.346	0.5052	Rps27
0.07991	75.6	85.63	3.624e-45	0.5586	Trf
0.07842	23.46	25.94	0.4651	0.5044	Gbp7
0.07511	98.38	99.4	7.35e-61	0.5685	Lgmn
0.07247	42.02	51.8	0.08012	0.5087	Rps9
0.07184	42.7	52.33	0.1016	0.5084	Pdia6
0.06946	24.8	28.93	1	0.5011	Rpl23a
0.06913	32.59	39.22	1	0.5022	Rpl17
0.06875	81.53	90.06	6.789e-36	0.5522	Maf
0.06875	56.28	67.54	1.003e-11	0.5284	Cfl1
0.06873	25.81	30.1	1	0.5011	Rpl41
0.06865	31.41	38.3	1	0.4999	Rpl13
0.06829	66.83	79.04	7.561e-24	0.542	Calm2
0.06821	75.39	86.63	9.541e-43	0.557	Gnai2
0.06488	36.2	44.64	1	0.5015	Rps3
0.06349	20.87	23.7	1	0.5011	Rps25
0.06262	19.88	22.75	1	0.4998	Rpl34
0.06216	29.52	35.59	1	0.5	Tpt1
0.06181	81.43	90.98	9.91e-45	0.5585	Glul
0.06065	33.08	39.82	1	0.5013	Gapdh
0.05968	29.22	36.13	0.805	0.4965	Rps24
0.05894	59.43	71.6	3.228e-11	0.5279	Tyrobp
0.05868	77.8	88.37	1.436e-34	0.5512	Ifngr1
0.05837	94.3	97.95	7.086e-49	0.5612	Marcks
0.05836	28.6	34.74	1	0.4975	Rpl32
0.05767	21.1	25.74	0.2133	0.4943	Sh3bgrl3
0.05748	54.62	65.58	4.818e-06	0.5196	Slc2a5
0.05585	43.4	54.54	0.6032	0.5047	Bsg
0.05546	84.88	93.6	3.309e-34	0.551	Filip1l
0.05543	33.99	42.31	1	0.4976	Rps8
0.0551	26.91	32.67	0.8853	0.497	Rps27a
0.05335	12.41	12.98	0.7886	0.5024	Sult1a1
0.05202	28.68	34.82	0.6576	0.4961	Tmem176b
0.05164	38.09	47.56	1	0.4993	Eif1
0.05154	18.87	22.41	0.3427	0.4953	Rps21
0.05146	20.23	24.17	0.3793	0.4954	Ecscr
0.05142	68.08	80.71	8.638e-20	0.5381	Trem2
0.05103	12.94	14.47	1	0.4988	Rpl29
0.05013	58.72	51.82	1	0.503	Atp8a2
0.05012	95.87	98.69	5.117e-54	0.5644	Serinc3
0.04965	22.67	28.38	0.02575	0.4913	Rps18
0.04933	66.87	79.07	9.34e-13	0.5302	Hspa5
0.0492	27.27	33.92	0.1597	0.4933	Rps11
0.04845	21.73	26.55	0.1187	0.4934	Kxd1
0.0481	23.21	28.67	0.08187	0.4927	Rpl19
0.04798	32.69	41.33	0.288	0.4939	Pdia4
0.04783	76.82	88.31	1.152e-33	0.5505	Tln1
0.04772	61.41	74.14	5.655e-11	0.5277	Ywhah
0.04741	29.51	37.43	0.0646	0.4917	Rpl14
0.04609	27.08	33.99	0.07452	0.4921	Rpl11
0.04571	23.32	29.55	0.01507	0.4906	Rpl6
0.04566	58.5	71.49	2.332e-07	0.5221	Fscn1
0.04563	48.99	62.16	0.154	0.5079	Aif1
0.04562	20.27	24.92	0.04102	0.4922	Rps15
0.04521	22.47	28.51	0.004488	0.4895	Tmco1
0.0445	8.625	8.154	0.06003	0.5047	Gm54867
0.04405	20.66	25.6	0.02215	0.4915	Cox4i1
0.04398	18.54	22.67	0.05495	0.4928	Rpl35a
0.04391	20.94	25.74	0.03119	0.4918	Rps26
0.04362	25.59	32.76	0.008053	0.4896	Rpl8
0.04301	18.5	22.54	0.03361	0.4923	C5ar2
0.04297	48.22	60.84	0.2259	0.5072	Pfn1
0.04296	27.07	34.31	0.01971	0.4905	Ubb
0.04296	14.97	17.66	0.1857	0.4949	Rpl35
0.04281	34.64	43.72	0.4038	0.4946	Rpl23
0.0427	23.24	28.98	0.03118	0.4915	Rpl7
0.04175	22.07	27.37	0.02807	0.4915	Rps6
0.04038	29.58	37.7	0.02727	0.4906	Rpl10
0.04009	19.38	24.35	0.003148	0.4898	Selenos
0.03947	22.37	28.52	0.0016	0.4886	Rpl12
0.03942	85.61	94.17	6.889e-34	0.5507	Cd81
0.03876	20.36	25.76	0.001842	0.4891	Dusp7
0.0381	23.9	30.48	0.001861	0.4885	Rpl22
0.03802	21.49	27.31	0.001442	0.4887	Rpl31
0.03802	17.19	21.48	0.003514	0.4904	Rps20
0.03797	34	43.93	0.0646	0.4913	Ckb
0.03708	15.04	17.9	0.08882	0.494	Rpl36a
0.03698	10.43	11.93	0.4458	0.4968	Ang
0.03667	12.36	14.54	0.1296	0.4949	Rpl36
0.0366	73.74	86.17	5.625e-24	0.5423	Eif4g2
0.03579	14	16.84	0.04111	0.4933	Rpl38
0.03553	25.22	32.69	0.0002524	0.4865	Rps12
0.0355	23.41	30.3	0.000236	0.4868	Rps7
0.0354	13.11	15.36	0.1667	0.495	Rpl39
0.03503	33.17	41.88	0.05315	0.4912	Crybb1
0.03491	20.34	25.95	0.0003964	0.4879	Rps2
0.03409	6.625	6.341	0.3083	0.5029	Gm48099
0.03389	18.54	23.67	0.0002556	0.488	Hsbp1
0.03385	90.65	96.84	7.12e-41	0.5559	Itgam
0.03371	15.92	19.68	0.003884	0.4908	Emc7
0.03298	10.46	12.45	0.06512	0.4945	Rpl27
0.03264	21.39	27.06	0.0005765	0.488	Ppfia4
0.03262	49.06	61.8	0.5826	0.5049	Kpna1
0.0323	14.91	18.84	0.0004482	0.4894	Rps10
0.03198	25.78	34	1.806e-05	0.4843	Rps14
0.03151	18	22.91	0.0002868	0.4882	Rps17
0.0311	38.15	49.95	0.06331	0.491	Sting1
0.03094	27.31	35.85	0.0001644	0.4858	Gnb2
0.03074	26.51	33.91	0.0008493	0.4874	Aldoa - ENSMUSG00000030695
0.0304	27.62	35.78	0.0003778	0.4864	Rplp0
0.02944	32.64	42.56	0.002401	0.4875	Ppp1r18
0.02925	27	35.24	7.151e-05	0.4852	Rps5
0.02877	16.16	20.98	2.178e-05	0.487	Rpl30
0.02847	28.02	37.16	4.682e-05	0.4846	Rack1
0.02779	58.72	72.93	0.0003768	0.5159	Pld4
0.02752	13.19	17.02	4.236e-05	0.4884	Pfdn5
0.0275	82.17	92.09	8.747e-30	0.5474	Canx
0.02747	19.39	25.85	2.988e-07	0.4833	Rpl9
0.02745	13.05	16.75	5.172e-05	0.4886	Rps28
0.0266	95.83	98.3	2.17e-16	0.5347	Ctsb
0.02593	37.51	49.58	0.01762	0.4893	Tmem50a
0.02548	7.419	7.938	1	0.4989	Gm43821
0.02492	64.05	77.65	3.468e-08	0.5237	Eef2
0.0244	18.05	24.07	1.211e-07	0.4833	Rps19
0.02387	14.98	19.32	1.517e-05	0.4872	Rpl28
0.02379	35.52	46.57	0.003419	0.4876	Actg1
0.02369	9.377	11.34	0.01611	0.4937	Chchd2
0.02198	10.84	14.06	1.977e-05	0.4889	Cox6a1
0.02183	19.39	26.18	1.822e-08	0.4817	D130009I18Rik
0.02169	13.24	17.18	6.478e-06	0.4873	Ahsa1
0.02168	22.6	30.44	3.666e-08	0.4811	Gabarap
0.02158	10.95	14.24	3.99e-06	0.488	Gm11867
0.02102	12.71	16.71	1.817e-06	0.4868	Myd88
0.02101	7.221	8.407	0.1238	0.4959	Peg10
0.02086	18.98	25.87	2.799e-09	0.4809	Ppp1ca
0.02061	5.462	6.112	0.5758	0.4979	Uqcr11
0.02045	15.97	21.13	2.489e-07	0.4844	Syf2
0.02035	35.44	46.64	0.001786	0.4869	Atp5b
0.02025	7.561	8.74	0.1774	0.4962	9330185C12Rik
0.02009	13.73	17.7	1.512e-05	0.4876	Tuba1a
0.0199	11.35	14.9	3.339e-06	0.4877	Drap1
0.01971	8.569	10.64	0.002283	0.4926	Grcc10
0.01915	14.41	19.14	1.485e-07	0.4848	Fkbp4
0.01897	14.82	20.39	6.808e-10	0.482	Rps16
0.01894	7.462	9.283	0.002843	0.4932	Tomm6
0.01811	17.25	23.39	3.144e-09	0.4817	Irf2bpl
0.01775	29.17	39.39	4.868e-07	0.4811	Zfp706
0.01741	14.78	19.85	2.709e-08	0.4838	Siglece
0.01733	11.22	14.71	4.254e-06	0.4879	Atp5h
0.01726	6.696	8.074	0.02136	0.4947	Serpinf1
0.01719	14.21	19.5	7.506e-10	0.4823	Rpl18
0.01715	19.08	25.92	1.989e-09	0.4807	Rpl24
0.01713	6.1	7.198	0.08915	0.496	Cetn2
0.01705	44.49	57.42	0.2438	0.4931	Ogfrl1
0.01699	21.61	29.29	1.739e-09	0.4798	Gpx1
0.01661	86.2	94.71	1.914e-26	0.5446	Kctd12
0.0166	14.33	19.29	2.429e-08	0.4839	Gm21988
0.01623	20.74	27.95	3.135e-09	0.4804	Manf
0.01618	12.81	17.35	1.523e-08	0.4844	Psmb8
0.01606	20.2	27.74	1.449e-10	0.479	Ltc4s
0.01591	11.32	15.06	3.934e-07	0.4867	Klk8
0.0159	66.48	80.69	3.224e-10	0.5268	Tmbim6
0.01559	8.753	11.42	2.395e-05	0.49	Cnpy2
0.0153	8.455	10.86	0.0001261	0.491	Dynll1
0.01511	28.68	39.48	3.417e-09	0.4781	Irf2bp2
0.01501	19.49	26.61	2.366e-10	0.4795	Mid1ip1
0.01463	7.746	10.31	6.444e-06	0.4899	Ndufa13
0.01418	10.38	13.88	2.836e-07	0.487	Eif3g
0.01403	32.8	44.29	5.254e-06	0.4821	Reep5
0.01395	5.589	7.124	0.001687	0.4937	Cox5b
0.0139	19.72	27.3	1.936e-11	0.4782	Rps15a
0.0138	55.48	70.05	0.1049	0.5087	Prrc2a
0.01378	7.916	10.34	3.134e-05	0.4905	Mrpl52
0.0137	7.107	9.054	0.0004786	0.4923	Bmyc
0.01353	22.1	29.88	5.775e-09	0.4802	Ppia
0.01329	6.143	8.068	0.00011	0.4921	Txndc17
0.01307	16.46	22.83	3.059e-11	0.4798	Eef1b2
0.01301	36.1	48.16	6.84e-05	0.4838	Gng10
0.01251	5.121	6.507	0.002901	0.4942	Ndufa3
0.01211	4.27	5.076	0.1044	0.4967	Tomm7
0.01209	5.448	6.698	0.01393	0.4949	Rpl36al
0.01202	10.55	14.61	2.099e-09	0.4847	Tor4a
0.01171	60.89	75.87	0.0002578	0.5164	Adgrg1
0.01165	9.448	12.67	4.054e-07	0.4877	Nme2
0.01158	39.75	53.04	0.002668	0.4869	P4hb
0.01149	9.023	12.51	9.309e-09	0.4863	Lamtor4
0.01149	7.604	10.58	5.186e-08	0.4879	Uqcrb
0.01141	8.228	11.19	2.605e-07	0.4882	Snrnp27
0.01141	5.788	7.679	7.229e-05	0.4921	Ramac
0.01125	16.63	23.33	8.476e-13	0.4782	Cct5
0.01116	5.206	6.482	0.008053	0.4947	Cdk2ap2
0.01112	4.866	6.223	0.002387	0.4943	Wdr83os
0.01104	10.61	14.6	4.246e-09	0.485	Edf1
0.01089	12.07	16.79	1.572e-10	0.4828	Cstf2t
0.01088	6.129	8.283	9.392e-06	0.491	Arf5
0.01087	10.94	15.22	5.341e-10	0.484	Gpsm3
0.01084	8.526	11.61	1.718e-07	0.4878	Tbcb
0.0108	13.97	19.23	1.952e-10	0.4819	Mbd3
0.0108	6.285	8.407	1.762e-05	0.4912	Ndufb10
0.01078	12.1	17.1	9.564e-12	0.4816	Ranbp1
0.01062	5.348	6.748	0.003132	0.4942	Srm
0.01056	17.63	24.64	2.604e-12	0.4782	Aup1
0.01052	5.462	6.97	0.001436	0.4937	Lamtor2
0.01051	26.22	34.04	2.814e-07	0.4815	Gm45837
0.01049	21.92	30.41	6.775e-12	0.4769	Rpl7a
0.01043	11.14	15.27	4.338e-09	0.4847	Rabac1
0.01035	11.26	15.58	7.259e-10	0.4839	Fkbp2
0.01033	6.866	9.184	8.316e-06	0.4905	Rinl
0.01026	3.759	4.41	0.1913	0.4973	G530011O06Rik
0.01011	5.689	7.488	0.0001217	0.4924	Anapc13
0.01003	19.85	27.85	1.094e-12	0.4768	Mrfap1
0.01001	8.086	11.08	1.504e-07	0.488	Creld2
0.01001	5.292	6.988	0.0001824	0.4928	Atp5e
0.009998	14.21	19.3	1.419e-09	0.4827	Gm49368
0.009708	19.99	27.72	2.975e-12	0.4773	Stip1
0.00965	8.71	11.8	1.759e-07	0.4877	Hmgn2
0.009592	4.809	6.193	0.001608	0.4941	Rps27l
0.009539	3.972	5.095	0.005028	0.4951	Atp5g1
0.009513	7.391	9.936	2.199e-06	0.4896	Ptov1
0.009391	3.788	4.817	0.008293	0.4954	Atp5k
0.009246	49.4	64.05	1	0.4986	Arhgdia
0.009227	14.98	20.95	3.779e-12	0.4797	Hfe
0.009194	9.051	12.37	3.897e-08	0.4869	Gpx4
0.009075	8.342	11.39	1.247e-07	0.4878	Srp14
0.009031	5.618	7.661	8.295e-06	0.4913	Smdt1
0.008973	21.61	30.04	2.678e-12	0.4765	Rpsa
0.008874	4.554	5.89	0.001503	0.4942	Ppp1r14b
0.008807	24	33.33	6.842e-12	0.4761	Itpripl1
0.008789	17.45	24.91	2.13e-14	0.4762	Rps13
0.008761	9.533	13.29	2.2e-09	0.4854	Rpl27a
0.008758	20.1	28.34	4.256e-13	0.4763	Ddost
0.008743	7.604	10.5	8.417e-08	0.4881	Adrm1
0.008732	9.633	13.68	9.715e-11	0.4841	Ramp2
0.008626	53.2	68.11	0.7015	0.5044	Mlec
0.00858	4.313	5.829	0.0001291	0.4933	Gm7964
0.008516	4.809	6.513	5.021e-05	0.4925	Arl6ip4
0.008406	15.79	22.24	5.263e-13	0.4784	Tuba1b
0.008404	10.53	14.74	1.798e-10	0.4838	Cacybp
0.008404	5.362	7.21	3.275e-05	0.492	Ndufa2
0.008394	8.909	12.31	1.143e-08	0.4865	H2az1
0.008302	2.525	3.065	0.1445	0.4976	Scand1
0.008282	8.427	11.83	2.778e-09	0.4862	Dhrs7
0.008259	4.88	6.563	7.626e-05	0.4927	Tmem37
0.008243	6.895	9.48	3.915e-07	0.4892	Ndufs8
0.008186	10.31	14.21	2.7e-09	0.485	Gabarapl2
0.008167	8.03	11.22	8.939e-09	0.4869	Ndufa4
0.008108	15.09	21.41	1.63e-13	0.4783	Pdap1
0.00809	4.653	6.168	0.0002741	0.4934	1810009A15Rik
0.008033	6.951	9.622	1.469e-07	0.4888	Eid1
0.007979	2.483	2.948	0.2473	0.4979	Naa38
0.007973	2.61	3.084	0.2603	0.4979	Rps4l
0.007962	3.49	4.595	0.002528	0.4951	Romo1
0.007948	54.66	67.33	1	0.5025	F11r
0.007898	12.33	16.43	1.652e-08	0.4848	Kitl
0.007854	13.99	20.3	4.321e-15	0.4775	Psme2
0.007833	12.8	18.2	1.425e-12	0.4805	Rnf187
0.007801	12.55	17.75	2.142e-12	0.4808	Nolc1
0.007746	11.22	15.8	3.583e-11	0.4827	Cox8a
0.007702	6.1	8.357	1.834e-06	0.4903	Spag7
0.007692	6.001	8.197	2.978e-06	0.4906	Hmga1
0.00766	10.5	15.14	1.029e-12	0.4818	Prdx5
0.007508	5.476	7.414	1.69e-05	0.4917	Apex1
0.007398	12.34	17.29	1.256e-11	0.4816	Hdgf
0.007398	7.959	11.34	9.059e-10	0.4861	Nol6
0.007382	6.781	9.566	2.552e-08	0.4882	Ndufb9
0.007339	44.93	58.77	0.06858	0.4908	Lrrc3
0.007282	7.292	10.29	1.075e-08	0.4875	Ndufa6
0.007095	10.37	14.69	4.178e-11	0.4833	Tprgl
0.007073	2.029	2.116	1	0.4997	Postn
0.007027	29.92	40.21	7.275e-08	0.4798	Tubb5
0.007012	28.12	38.67	3.667e-10	0.477	Rpn1
0.007002	4.043	5.52	0.0001063	0.4934	Svbp
0.006985	5.192	6.988	3.659e-05	0.4922	Cops9
0.006981	22.91	31.72	3.238e-12	0.4762	Cd14
0.006817	14.03	19.93	2.426e-13	0.4791	Ncoa4
0.006786	8.668	12.24	7.765e-10	0.4856	Eif1b
0.006728	5.448	7.42	9.744e-06	0.4915	Elob
0.006718	10.78	15.4	3.666e-12	0.4821	Sdf2l1
0.0066	5.575	7.759	1.115e-06	0.4905	Psenen
0.006582	4.965	6.976	1.631e-06	0.4911	Cryba4
0.00658	8.03	11.77	1.31e-11	0.4845	Spcs1
0.006571	3.816	5.064	0.0008439	0.4944	Mea1
0.006549	2.355	2.843	0.1828	0.4978	Lsm5
0.006499	1.958	2.085	1	0.4995	Rac3
0.006485	21.04	29.65	2.675e-13	0.4757	Tmed9
0.006482	2.965	3.664	0.05677	0.4969	Chchd1
0.006404	9.434	13.56	1.399e-11	0.4835	Ubxn1
0.006403	9.973	14.14	4.474e-11	0.4836	Nedd8
0.006402	5.675	8.08	9.906e-08	0.4895	Chmp6
0.006267	4.809	6.6	1.75e-05	0.4921	Trmt112
0.006264	7.618	10.92	6.184e-10	0.4862	Cox17
0.006249	8.427	11.92	8.818e-10	0.4858	H2-DMb1
0.006216	3.915	5.304	0.00024	0.4938	Ndufa1
0.006211	1.234	1.184	1	0.5003	Sec16b
0.006171	2.582	3.115	0.1549	0.4976	Gm10076
0.00616	17.21	24.6	7.936e-15	0.476	Cct7
0.006146	7.164	10.02	3.068e-08	0.488	Psmb6
0.006142	7.533	10.82	5.824e-10	0.4863	Polr2e
0.006111	2.88	3.695	0.01695	0.4963	Samd1
0.006107	8.739	12.1	7.381e-09	0.4864	Tmsb10
0.006105	3.433	4.681	0.0003682	0.4943	Ndufc1
0.005975	6.441	9.351	2.527e-09	0.4876	Cib1
0.005974	7.632	10.81	2.249e-09	0.4867	Atp5j2
0.005971	3.547	4.737	0.0009464	0.4946	Spr
0.005957	0.9647	0.7525	0.287	0.5011	Mpc1-ps
0.00594	9.831	14.07	1.222e-11	0.4832	Tmed3
0.005898	2.851	3.738	0.007383	0.4959	Mrpl36
0.005879	6.483	9.017	1.803e-07	0.4892	Gtf3c6
0.005875	12.63	18.53	2.257e-15	0.4782	Zfp691
0.00584	6.512	9.246	2.205e-08	0.4883	Psmb10
0.00584	7.249	9.388	4.905e-05	0.4911	Mid1
0.005811	11.14	15.75	1.095e-11	0.4823	Fam50a
0.005811	2.1	2.529	0.2299	0.498	Gstp1
0.005793	12.99	18.66	9.976e-14	0.4793	Cybc1
0.005789	1.575	1.776	0.818	0.4991	Ubb-ps
0.005779	5.065	6.717	0.0001303	0.4928	Sf3b4
0.005774	8.03	10.91	1.833e-07	0.4882	Fcrl1
0.00577	3.703	5.008	0.0003434	0.4941	Uqcr10
0.005768	3.192	4.33	0.000828	0.4948	Pfdn6
0.005713	5.433	7.605	9.208e-07	0.4905	Krtcap2
0.005684	4.965	6.939	2.6e-06	0.4913	Bag5
0.005663	3.461	4.533	0.002964	0.4952	Timm13
0.005644	42.02	56.39	0.003097	0.4869	Serbp1
0.005505	6.171	8.814	1.865e-08	0.4886	Higd2a
0.005485	1.759	2.22	0.118	0.4978	Mrpl34
0.005447	4.369	5.779	0.0004062	0.4937	Tmem276-zftraf1
0.005393	3.305	4.564	0.0002219	0.4942	Gm24407
0.005359	1.078	1.116	1	0.4999	Gm15427
0.005298	2.922	3.984	0.0011	0.4951	Rps19bp1
0.005237	5.022	7.13	5.962e-07	0.4907	Mrpl18
0.005236	11.53	16.48	1.057e-12	0.4812	Nol7
0.005231	3.774	5.415	5.537e-06	0.4925	Ghdc
0.005141	11.92	17.29	4.582e-14	0.4797	Nop53
0.005137	6.909	9.955	1.349e-09	0.487	Cuta
0.005119	1.944	2.331	0.2782	0.4982	Pold2
0.005112	2.312	2.979	0.03061	0.4969	Ssna1
0.005109	1.646	2.011	0.2548	0.4983	Polr2i
0.005096	7.646	10.94	6.919e-10	0.4862	Ubl5
0.005083	6.866	10.07	1.949e-10	0.4864	Arsa
0.005043	20.03	28.09	6.128e-14	0.4755	Tppp
0.005001	18.61	27.05	9.061e-17	0.4735	Prkab1
0.004934	54.77	69.6	1	0.5032	Fcgr2b
0.004931	2.795	3.651	0.008843	0.4961	Tlcd4
0.004929	27.22	37.69	8.971e-12	0.4753	mt-Nd1
0.004925	2.1	2.757	0.02375	0.4969	0610012G03Rik
0.004914	16.26	23.72	1.222e-16	0.4749	Eif3b
0.004875	3.008	4.065	0.00135	0.4951	Smim12
0.004855	0.4823	0.1295	1.701e-06	0.5018	Gm14330
0.004854	27.64	38.34	4.136e-11	0.4759	Rpl5
0.004835	3.717	5.039	0.000278	0.494	Ndufb11
0.004833	5.405	7.846	2.301e-08	0.4892	Atp5o - ENSMUSG00000022956
0.004763	3.532	4.799	0.0003495	0.4942	Gadd45gip1
0.004716	5.987	8.444	1.248e-07	0.4894	Olfml2b
0.004698	5.845	8.271	1.036e-07	0.4894	Ndufb7
0.004669	2.483	3.392	0.002503	0.4957	Zfp637
0.004651	5.121	7.229	7.383e-07	0.4907	Uqcrq
0.00465	10.53	15.38	9.504e-14	0.481	Ran
0.004629	2.312	3.072	0.01103	0.4965	Hras
0.004626	2.497	3.399	0.002768	0.4958	Hcfc1r1
0.00461	3.107	4.108	0.003035	0.4954	Npm3
0.004605	2.525	3.466	0.001901	0.4956	Gm38843
0.004598	3.759	5.496	1.571e-06	0.4921	Nsmce3
0.00458	1.958	2.603	0.02046	0.497	Hint2
0.004517	10.3	14.82	2.386e-12	0.4823	Rbm8a
0.004498	4.455	6.408	7.618e-07	0.4912	Ccdc124
0.004315	1.348	1.511	0.8949	0.4992	Cd320
0.004307	17.36	24.65	6.585e-15	0.4759	Psme1
0.004297	5.121	7.358	1.366e-07	0.4901	Sec61b
0.004289	2.823	3.824	0.001786	0.4954	Mrpl35
0.004229	3.277	4.595	9.429e-05	0.4939	Tor2a
0.004222	1.901	2.473	0.04286	0.4973	Pde2a
0.004219	39.51	53.43	0.0002241	0.4844	Coro1a
0.004218	1.22	1.462	0.4751	0.4988	Hbb-bs
0.004217	1.873	2.381	0.08079	0.4976	Hyal2
0.004186	4.242	6.032	3.322e-06	0.4919	Uqcc2
0.004164	8.086	11.68	6.687e-11	0.4851	Creb3
0.004155	9.349	13.94	2.71e-14	0.4814	Vps28
0.00415	3.447	4.959	1.292e-05	0.4931	Snrpf
0.004132	5.788	8.246	5.505e-08	0.4892	Tma7
0.004078	2.142	2.905	0.007116	0.4964	Rapsn
0.00405	10.85	15.73	2.667e-13	0.4811	Paqr3
0.004016	1.078	1.079	1	0.5	Bloc1s1
0.003991	1.688	2.171	0.08126	0.4977	Gm4617
0.003984	4.823	7.056	4.492e-08	0.49	Slc10a3
0.003981	1.688	2.079	0.208	0.4982	Zfp185
0.003936	1.021	1.215	0.6126	0.4991	Rps27rt
0.003931	1.135	1.326	0.6671	0.4991	Rpl10-ps3
0.003927	1.433	1.665	0.6032	0.4989	Pigyl
0.003919	5.221	7.574	3.265e-08	0.4895	Ubxn8
0.003905	5.292	7.765	1.019e-08	0.489	Cyb5r1
0.00388	0.4682	0.4132	1	0.5003	Hba-a2
0.003878	10.4	15	8.413e-13	0.4818	Emc10
0.003851	2.979	4.114	0.0004617	0.4947	Vkorc1
0.00375	23	29.89	1.13e-08	0.4805	Upk1b
0.003739	1.546	1.869	0.3257	0.4985	Ppdpf
0.003739	1.036	1.147	1	0.4995	Smim27
0.003719	0.6242	0.4934	0.5501	0.5007	Capn11
0.003685	2.951	4.367	9.244e-06	0.4934	Triap1
0.003598	6.185	8.906	6.039e-09	0.4881	Ndufb8
0.003581	14.33	20.77	1.58e-15	0.477	Tle5
0.003578	12.65	18.46	2.686e-15	0.4782	Myl6
0.003542	1.163	1.388	0.5191	0.4989	Col6a6
0.003517	1.007	1.166	0.8034	0.4993	Gpx4-ps2
0.003504	5.788	8.45	4.274e-09	0.4883	Ebp
0.00347	1.05	1.123	1	0.4997	Gm15459
0.003404	5.916	8.228	4.441e-07	0.4899	Pja1
0.003312	1.844	2.492	0.01519	0.4969	Dpm3
0.0033	2.61	3.627	0.0008252	0.4952	Mien1
0.003295	5.675	8.394	1.182e-09	0.488	Vegfb
0.003281	4.965	7.161	1.35e-07	0.4902	Uqcrfs1
0.003255	6.554	8.678	1.175e-05	0.4909	Kcnip1
0.003229	1.107	1.246	0.9378	0.4993	Rpl9-ps6
0.003184	3.944	5.816	3.719e-07	0.4914	Coasy
0.003179	6.866	10.06	1.644e-10	0.4863	D8Ertd738e
0.003162	27.86	38.94	3.736e-12	0.4746	Naca
0.00315	2.851	4.046	0.0001438	0.4944	Lsm3
0.003119	1.291	1.542	0.468	0.4988	Polr2k
0.003107	0.454	0.4009	1	0.5003	Ptges3-ps
0.003068	2.298	3.201	0.001643	0.4957	Bod1
0.003057	5.079	7.451	1.82e-08	0.4894	Slc35b1
0.002983	0.5391	0.5304	1	0.5001	Gm13436
0.002974	1.234	1.511	0.3615	0.4987	Commd5
0.002971	7.079	10.64	2.283e-12	0.4847	Eif3k
0.002952	0.9647	1.277	0.1652	0.4985	Zfp689
0.002916	2.468	3.281	0.007231	0.4962	Gp9
0.002913	1.561	2.116	0.02633	0.4973	Jph3
0.002909	7.107	10.52	1.926e-11	0.4854	Uqcrh
0.002902	3.49	4.99	1.421e-05	0.4931	Micos13
0.002885	5.916	8.573	5.369e-09	0.4883	0610010K14Rik
0.002874	3.022	4.435	1.205e-05	0.4934	Ndufb2
0.002868	1.234	1.616	0.115	0.4982	Gm8093
0.002858	1.631	2.319	0.005395	0.4967	Praf2
0.002849	1.646	2.214	0.02664	0.4973	Zfp524
0.002846	3.873	5.699	5.446e-07	0.4916	Znhit1
0.002846	1.731	2.523	0.001537	0.4962	Abt1
0.002842	1.177	1.369	0.6798	0.4991	Tmem276
0.002796	1.603	2.301	0.00409	0.4966	Tomm5
0.002749	0.6668	0.66	1	0.5	Gm16867
0.00274	3.149	4.607	9.105e-06	0.4932	Ndufa5
0.002732	1.929	2.424	0.09708	0.4977	Mrpl57
0.002718	1.05	1.258	0.5385	0.499	Gm4524
0.002702	1.22	1.567	0.1692	0.4983	Tmem42
0.002688	3.22	4.712	7.277e-06	0.4931	AI837181
0.002662	0.5675	0.66	0.9956	0.4996	Hba-a1
0.002657	0.5816	0.6168	1	0.4998	Gm10791
0.002654	3.078	4.287	0.0002254	0.4944	Mrpl51
0.002634	0.5391	0.5304	1	0.5001	Gm11772
0.002619	1.064	1.363	0.2298	0.4986	Gm49492
0.00261	3.093	4.41	5.161e-05	0.4939	Fbxo6
0.002595	3.915	5.724	7.247e-07	0.4917	Emc6
0.002594	0.8937	0.993	1	0.4995	Gm42944
0.002585	1.461	1.961	0.04144	0.4976	Gm9800
0.002571	4.511	6.606	1.13e-07	0.4905	Stoml2
0.002558	14.07	20.74	2.761e-17	0.4757	Psma7
0.002551	4.738	7.081	6.799e-09	0.4894	Gatd3a
0.002538	0.5249	0.4811	1	0.5002	Gm37194
0.002529	12.19	17.85	2.004e-15	0.4785	Puf60
0.002518	9.179	13.75	1.505e-14	0.4813	Retreg2
0.002518	7.292	10.65	4.642e-11	0.4856	Irf2bp1
0.002515	4.043	5.878	8.34e-07	0.4916	Mrpl43
0.002483	2.171	3.028	0.002092	0.4959	0610009B22Rik
0.002481	6.611	9.708	1.636e-10	0.4866	Prelid1
0.002423	2.653	3.75	0.0003173	0.4949	Cdkn1c
0.002401	6.129	9.122	1.144e-10	0.4869	Cdc42ep3
0.0024	1.291	1.813	0.02083	0.4975	Snapc2
0.002395	1.149	1.456	0.2392	0.4985	Ddx28
0.00237	3.405	4.86	2.111e-05	0.4933	Sall2
0.002367	11.58	16.79	4.895e-14	0.48	Rbm42
0.002362	23.62	33.29	3.28e-14	0.4738	Gm21970
0.002343	4.724	6.97	2.426e-08	0.4898	Inka1
0.002328	15.04	21.84	3.576e-16	0.476	Ap2m1
0.002313	3.078	4.484	1.422e-05	0.4934	Borcs6
0.002289	1.22	1.511	0.3032	0.4986	Mad2l1
0.002289	1.007	1.19	0.6576	0.4991	Gm5814
0.002283	2.014	2.769	0.005573	0.4964	Ppp1r26
0.002281	1.561	2.097	0.03298	0.4974	Ndufs5
0.002255	3.802	5.613	4.885e-07	0.4917	Lsm4
0.002248	2.653	3.935	2.239e-05	0.494	Trappc5
0.002233	4.923	7.408	1.765e-09	0.4888	Grpel1
0.002233	0.4823	0.5613	1	0.4996	C130074G19Rik
0.002227	3.022	4.324	5.161e-05	0.4939	Dph3
0.002223	4.88	7.198	1.577e-08	0.4896	Pagr1a
0.002223	0.5816	0.6538	1	0.4997	Tmem52
0.002212	3.391	4.91	8.286e-06	0.493	Nt5c
0.002191	7.646	11.4	1.194e-12	0.4841	Tmem14c
0.002182	1.036	1.382	0.123	0.4983	Mettl18
0.002171	2.256	3.337	0.0001153	0.4949	Uqcc3
0.002161	3.235	4.823	1.661e-06	0.4926	Snrpe
0.002155	12.47	18.5	7.071e-17	0.4771	Eif3d
0.00214	1.49	2.054	0.01974	0.4973	Suox
0.00214	0.3972	0.3577	1	0.5002	1700034P13Rik
0.002117	0.4682	0.4934	1	0.4999	Ccl24
0.002095	6.199	8.919	5.307e-09	0.4881	Etfb
0.002085	2.468	3.565	0.0001758	0.4948	S100a13
0.002075	3.249	4.688	1.582e-05	0.4933	Rex1bd
0.002073	5.462	7.95	1.177e-08	0.489	Ift20
0.00207	3.845	5.6	1.231e-06	0.4919	Tbrg1
0.002069	0.5675	0.6538	1	0.4996	Gm14303
0.002038	4.554	6.526	5.904e-07	0.4911	Prorsd1
0.002037	6.029	9.085	3.012e-11	0.4865	Fam89b
0.002034	1.291	1.795	0.02677	0.4976	Ydjc
0.00203	0.7944	1.086	0.1504	0.4986	Gm5617
0.002028	0.6526	0.7587	0.9272	0.4995	Gm49513
0.002025	0.4682	0.4996	1	0.4999	Gm9616
0.002015	0.4682	0.5428	1	0.4996	Fgfbp3
0.002012	1.036	1.419	0.07544	0.4981	Tmub1
0.002009	2.426	3.621	3.711e-05	0.4943	Smim1
0.002003	0.6242	0.5983	1	0.5001	Mmp23
0.001995	0.8796	1.061	0.5863	0.4991	Gm4204
0.001965	0.4256	0.4441	1	0.4999	Gm20707
0.00196	1.22	1.77	0.01127	0.4973	Sdhaf1
0.001957	0.3121	0.3392	1	0.4999	Gm38317
0.001944	0.454	0.4811	1	0.4999	Gm26650
0.001928	1.646	2.35	0.004067	0.4966	Noc4l
0.001923	21.99	30.93	9.327e-15	0.4739	Hyou1
0.001919	11.62	17.36	9.641e-17	0.4778	Smim15
0.001916	8.256	12.21	1.147e-12	0.4835	Cops6
0.001914	15.52	22.97	2.08e-18	0.4738	Prkcsh
0.001895	0.2979	0.2529	1	0.5002	Gm13410
0.001887	0.5816	0.6846	0.9028	0.4995	Scrn2
0.001885	0.5675	0.697	0.6998	0.4994	Rwdd2a
0.001865	7.363	9.881	7.825e-07	0.4892	Mpp7
0.001864	3.774	5.872	6.199e-09	0.4903	Mcrs1
0.001857	3.121	4.589	7.119e-06	0.4932	Aurkaip1
0.001855	4.071	6.02	1.75e-07	0.4911	Jagn1
0.001851	1.419	2.011	0.01097	0.4971	Selenbp1
0.001843	0.7377	0.9745	0.2712	0.4988	Ccdc166
0.001829	1.376	2.066	0.002133	0.4967	Pelo
0.001828	0.383	0.3269	1	0.5003	Peg12
0.001814	0.7235	0.882	0.6329	0.4992	Cisd3
0.001804	61.02	75.27	0.142	0.5083	Rgs2
0.001789	0.3972	0.4194	1	0.4999	Gm7135
0.001777	0.383	0.3762	1	0.5	Hspa12b
0.001768	18.46	26.18	4.159e-15	0.4751	Sox4
0.001763	5.958	8.765	7.206e-10	0.4876	Ino80c
0.001744	1.759	2.486	0.004254	0.4965	Mycl
0.001727	0.1844	0.09869	0.2772	0.5004	Gm10247
0.001719	1.674	2.516	0.0005606	0.4959	Cyb561d2
0.001718	1.802	2.547	0.003604	0.4964	Tpm3-rs7
0.001716	1.688	2.473	0.001411	0.4962	Cfap298
0.001712	2.795	4.028	6.907e-05	0.4942	Dbndd2
0.001703	0.8654	1.153	0.1818	0.4986	Cdr1os
0.001702	4.979	7.605	2.677e-10	0.4882	Ccdc115
0.0017	0.3263	0.3701	1	0.4998	Cfap65
0.00169	11.18	16.22	6.221e-14	0.4804	Tmem9b
0.001686	0.5249	0.5428	1	0.4999	Rps23-ps1
0.001675	1.192	1.56	0.1235	0.4982	Ddt
0.001675	1.787	2.646	0.0006678	0.4959	Zc4h2
0.001675	0.4682	0.5613	0.899	0.4995	Gm15500
0.00167	0.1561	0.08018	0.3033	0.5004	Rhox5
0.001668	0.7803	0.9745	0.464	0.4991	Rpl21-ps8
0.001666	7.646	11	1.983e-10	0.4858	Cox7b
0.001662	1.121	1.696	0.005421	0.4972	Zfp764
0.001651	1.206	1.709	0.02138	0.4976	Gm6477
0.001624	1.589	2.344	0.001633	0.4964	Phpt1
0.001606	1.404	1.912	0.03254	0.4975	Mrpl53
0.001605	11.62	17.34	8.682e-17	0.4778	Pom121
0.0016	0.7519	1.012	0.2065	0.4987	Gm4202
0.001595	0.2554	0.2097	1	0.5002	Gm21358
0.001578	1.319	1.924	0.006561	0.4971	Enpp5
0.001576	34.81	48.04	1.688e-08	0.4779	Spcs2
0.001569	1.603	2.344	0.002086	0.4964	Rpp21
0.001568	0.3405	0.2961	1	0.5002	Acta2
0.001565	2.823	4.311	1.579e-06	0.493	Coa3
0.001564	1.433	2.239	0.0003839	0.4961	Dgcr6
0.001558	4.866	7.216	9.387e-09	0.4894	Atp5md
0.001539	0.1986	0.1604	1	0.5002	Brinp1
0.001535	1.206	1.69	0.02826	0.4977	Map1b
0.001532	2.029	3.016	0.0002008	0.4953	Uba52
0.001529	1.49	2.177	0.003246	0.4967	Mrps12
0.001522	0.1702	0.1172	0.7791	0.5003	Gm6552
0.001511	0.2128	0.1295	0.3993	0.5004	Gm36888
0.001497	1.773	2.671	0.0003369	0.4957	Rab34
0.001496	0.3405	0.3639	1	0.4999	Psd
0.001493	0.1561	0.1172	1	0.5002	Asb18
0.001492	27.82	38.31	6.162e-12	0.475	Ccnd1
0.00148	3.447	5.304	5.959e-08	0.4913	Tusc2
0.001474	0.1986	0.2282	1	0.4999	Hbb-bt
0.001474	0.4682	0.5551	0.9573	0.4996	4930447J18Rik
0.001465	2.695	4.028	1.092e-05	0.4937	Hsd17b10
0.001462	1.546	2.22	0.004717	0.4967	Psmg3
0.001461	3.277	4.947	5.791e-07	0.4922	Psmb5
0.001448	0.3121	0.3207	1	0.5	Gm10177
0.001442	3.178	4.694	3.97e-06	0.4929	Mrpl22
0.001437	0.1986	0.1542	1	0.5002	Scamp4
0.001435	0.4114	0.4688	1	0.4997	Eno1b
0.00142	7.377	11	2.047e-12	0.4845	Tm2d2
0.001419	0.3405	0.3947	1	0.4997	Nat14
0.001414	10.55	15.52	1.228e-14	0.4803	Chmp2a
0.001409	6.1	9.042	2.039e-10	0.4871	Ech1
0.001398	0.6526	0.8388	0.4206	0.4991	Guca1a
0.001391	0.5107	0.6353	0.6887	0.4994	Rtl8c
0.00139	0.2554	0.2282	1	0.5001	Gm4961
0.001386	0.3547	0.4318	0.9467	0.4996	Fbxl16
0.001385	9.576	13.93	5.961e-13	0.4823	Atp6v1f
0.001385	1.39	1.894	0.03407	0.4976	Gm56077
0.001382	0.3405	0.3331	1	0.5	Gm6563
0.001381	3.802	5.792	3.436e-08	0.4908	Nenf
0.001378	4.923	7.352	3.294e-09	0.489	Tnfsf12
0.001375	1.433	1.912	0.05029	0.4977	Gm36266
0.001365	0.5391	0.6846	0.5698	0.4993	Gm9794
0.001353	0.3972	0.4503	1	0.4997	ENSMUSG00000120167
0.001347	1.135	1.616	0.02385	0.4977	Serf1
0.001346	6.809	10.32	1.573e-12	0.4849	Gnptg
0.001344	12.09	17.7	1.822e-15	0.4785	Fam217b
0.00134	0.1419	0.04934	0.06973	0.5005	Hpcal4
0.001335	3.646	5.415	5.195e-07	0.4918	Nubp2
0.001331	0.383	0.3639	1	0.5001	Gm10167
0.001318	28.54	40.31	4.725e-13	0.4734	Pcbp1
0.001314	0.3688	0.3824	1	0.4999	CN725425
0.001295	0.1844	0.111	0.45	0.5004	Gm12002
0.00129	0.227	0.2035	1	0.5001	Rab11b-ps2
0.001274	0.2979	0.3022	1	0.5	Ndrg4
0.001268	14.63	21.66	6.199e-18	0.4748	Pomp
0.001268	2	2.843	0.001541	0.496	Mrps26
0.001262	0.2412	0.2282	1	0.5001	Gm44103
0.00126	0.5249	0.7155	0.3223	0.4991	Gm32687
0.001257	0.227	0.2467	1	0.4999	Wfdc1
0.001254	0.4823	0.5798	0.8646	0.4995	Rbpj-ps3
0.001252	0.2128	0.2282	1	0.4999	Gm45021
0.001241	0.1419	0.05551	0.1164	0.5004	Gm8546
0.00124	1.05	1.554	0.013	0.4975	Them6
0.00124	0.9789	1.462	0.01414	0.4976	H2ac20
0.00123	0.3688	0.4318	1	0.4997	Gm13405
0.001229	4.114	6.223	1.909e-08	0.4903	Commd2
0.001228	0.2837	0.2961	1	0.4999	Plvap
0.001226	0.2837	0.3392	1	0.4997	Slc12a5
0.001222	0.2695	0.2652	1	0.5	ENSMUSG00000121319
0.001218	0.2128	0.1665	1	0.5002	Gm6560
0.001215	0.2554	0.2591	1	0.5	Gm17349
0.00121	0.1844	0.09252	0.2034	0.5005	Ddn
0.001207	0.2128	0.2591	1	0.4998	3110083C13Rik
0.001206	0.2979	0.2961	1	0.5	Gm10275
0.001199	4.781	7.321	4.084e-10	0.4885	Mdp1
0.001196	1.05	1.412	0.1007	0.4982	ENSMUSG00000121066
0.001195	0.3121	0.2899	1	0.5001	Tcp11
0.001192	0.5107	0.6785	0.4105	0.4992	Gm19716
0.001191	2.809	4.274	2.24e-06	0.4931	Mrpl28
0.001185	0.1419	0.08018	0.4769	0.5003	Igsf5
0.001171	9.093	13.51	5.252e-14	0.4819	Maf1
0.001167	6.199	8.832	1.468e-08	0.4885	Nabp2
0.00116	0.2979	0.3331	1	0.4998	Gm8797
0.001158	0.1702	0.148	1	0.5001	Eef1a2
0.001155	0.1844	0.185	1	0.5	Tbx3
0.001154	1.518	2.22	0.002809	0.4966	Tmed1
0.001152	0.1277	0.07401	0.5698	0.5003	Il2
0.001148	0.5958	0.8882	0.08178	0.4986	Gad1-ps
0.001147	0.4682	0.6106	0.5219	0.4993	ENSMUSG00000120390
0.001138	0.1702	0.1419	1	0.5001	Ncoa4-ps
0.001136	0.2695	0.3577	0.7328	0.4996	Dnd1
0.001129	4.923	7.457	7.966e-10	0.4886	Gtf3a
0.001129	0.1561	0.1604	1	0.5	B230303A05Rik
0.001117	0.1277	0.1542	1	0.4999	Notum
0.001115	0.2412	0.222	1	0.5001	Macroh2a2
0.001109	0.08512	0.02467	0.1379	0.5003	1700034J05Rik
0.0011	1.177	1.684	0.01854	0.4975	9130221H12Rik
0.001099	0.4398	0.5181	1	0.4996	Gm48249
0.001094	0.1277	0.06168	0.3257	0.5003	Celf5
0.001086	1.901	2.819	0.000376	0.4956	Dmac1
0.001086	0.1419	0.08635	0.606	0.5003	Gm28364
0.001081	0.1277	0.04934	0.1419	0.5004	Ppp1r14d
0.001077	1.475	2.165	0.002983	0.4967	Ppp1r35
0.001075	0.1135	0.04934	0.2713	0.5003	Gm14582
0.001064	0.1702	0.1665	1	0.5	Abcc6
0.001064	0.5958	0.8573	0.1346	0.4987	AW209491
0.001061	0.0993	0.03701	0.2084	0.5003	Cnih3
0.001058	9.051	13.42	7.741e-14	0.482	Cnih1
0.001058	0.2695	0.2776	1	0.5	Mrpl23-ps1
0.001055	0.2837	0.3577	0.8868	0.4996	Gm16415
0.00105	1.277	1.998	0.0008492	0.4965	Alyref2
0.001049	2.029	3.102	5.05e-05	0.4948	Ccnq
0.001049	0.2128	0.185	1	0.5001	Gm6594
0.001047	0.5958	0.8512	0.1487	0.4987	Rtl8b
0.001045	0.3263	0.4564	0.4584	0.4994	Lgals4
0.001042	0.08512	0.03701	0.4005	0.5002	Gm3143
0.001041	0.3405	0.4132	0.9831	0.4996	Ly6g6e
0.00104	3.915	5.859	1.045e-07	0.4911	Gm21974
0.00104	0.3263	0.3886	1	0.4997	Faddos
0.001039	2.383	3.59	2.489e-05	0.4943	Rrp9
0.001028	0.2979	0.3269	1	0.4999	Stx1b
0.001027	0.1844	0.1172	0.5538	0.5003	Rian
0.001025	3.433	5.15	4.62e-07	0.492	Mrps34
0.001016	1.546	2.282	0.001853	0.4964	Jcad
0.001015	0.08512	0.04934	0.7781	0.5002	ENSMUSG00000120926
0.001012	0.2554	0.2529	1	0.5	Defb42
0.001008	0.6668	0.9437	0.131	0.4986	Psmc3ip
0.001004	0.5107	0.7155	0.2509	0.499	Hilpda
0.001001	0.383	0.4934	0.6699	0.4995	Ecrg4
0.0009923	0.1986	0.185	1	0.5001	Cxcr3
0.0009889	3.305	4.947	8.885e-07	0.4923	Retsat
0.0009839	0.3405	0.3947	1	0.4997	Gm45213
0.0009811	9.164	13.83	2.333e-15	0.4808	Fkbp3
0.0009805	0.6242	0.8697	0.185	0.4988	Unc5a
0.0009776	0.1986	0.1974	1	0.5	Rsph4a
0.0009741	0.0993	0.04318	0.3322	0.5003	Actg-ps1
0.0009718	3.291	5.107	5.571e-08	0.4915	Tmem160
0.0009691	0.3121	0.3454	1	0.4998	Ccdc50-ps
0.0009664	0.1844	0.148	1	0.5002	Bmx
0.0009639	0.2695	0.3269	1	0.4997	B130046B21Rik
0.000961	0.5533	0.7525	0.3032	0.499	Dusp23
0.0009604	0.3547	0.4749	0.5648	0.4994	2310039H08Rik
0.0009599	0.2554	0.2961	1	0.4998	Lgi3
0.0009525	0.1419	0.08018	0.4773	0.5003	4930447N08Rik
0.0009494	0.1561	0.1604	1	0.5	Gad1
0.0009485	0.1419	0.09869	0.8632	0.5002	Fndc3c1
0.000948	0.9221	1.326	0.04064	0.498	Sac3d1
0.0009478	0.1135	0.08635	1	0.5001	Gabrb2
0.0009474	0.227	0.2714	1	0.4998	Gm16378
0.0009434	0.5675	0.7525	0.3762	0.4991	Plscr1
0.0009416	1.433	2.103	0.003417	0.4967	Ndufaf8
0.0009387	0.3547	0.4318	0.9423	0.4996	Gm17168
0.0009381	0.1135	0.05551	0.3872	0.5003	Epor
0.0009379	0.1986	0.2344	1	0.4998	Gm20496
0.0009372	1.376	1.931	0.01605	0.4973	Plppr3
0.0009372	0.2695	0.2776	1	0.5	Adamts3
0.0009361	3.887	5.94	1.577e-08	0.4905	Tmem256
0.0009354	0.07093	0.02467	0.3077	0.5002	Gpr161
0.0009319	0.1135	0.06168	0.5243	0.5003	Gm16589
0.0009317	0.1986	0.2097	1	0.4999	Dapk2
0.0009311	0.4823	0.6353	0.4734	0.4992	Nme4
0.0009305	0.07093	0	0.002867	0.5004	1700027F09Rik
0.0009303	0.2837	0.3207	1	0.4998	G630055G22Rik
0.0009265	0.5816	0.771	0.3674	0.4991	Gm9796
0.0009233	0.08512	0.03084	0.2547	0.5003	Gm42814
0.0009178	0.1702	0.1542	1	0.5001	Gm13904
0.0009151	0.1844	0.185	1	0.5	Gm27168
0.0009149	0.4256	0.6168	0.2416	0.4991	Prom2
0.0009111	0.2695	0.2899	1	0.4999	Gm44662
0.0009077	0.2554	0.3146	1	0.4997	Adrm1b
0.0009058	0.5533	0.7093	0.5137	0.4992	Duoxa1
0.0009052	0.1986	0.1912	1	0.5	Gm49207
0.0009011	0.454	0.6415	0.2785	0.4991	Asxl3
0.0009009	0.1702	0.1604	1	0.5001	Gm12316
0.0009006	0.3121	0.3392	1	0.4999	Gm45732
0.0009002	0.1277	0.08635	0.8452	0.5002	Mannr
0.000898	0.1702	0.1727	1	0.5	Kcnh6
0.0008952	0.2837	0.3331	1	0.4998	Plcxd3
0.0008922	0.1277	0.07401	0.5698	0.5003	Gm10095
0.0008848	0.1277	0.07401	0.5698	0.5003	Fam163b
0.000883	1.787	2.578	0.001717	0.4962	Inafm1
0.0008825	0.1419	0.1357	1	0.5	Syne3
0.0008804	0.5958	0.9005	0.06645	0.4985	Pcp4l1
0.0008787	0.1561	0.1357	1	0.5001	Gm8337
0.0008767	0.4965	0.6538	0.4603	0.4992	Klhl35
0.0008737	0.08512	0.06168	1	0.5001	Gm44386
0.0008735	0.05675	0	0.009539	0.5003	Gmfg-ps
0.0008733	0.1419	0.1295	1	0.5001	ENSMUSG00000120570
0.0008709	0.07093	0.0185	0.1583	0.5003	Gm12020
0.0008691	0.07093	0.006168	0.01802	0.5003	Rn7s6
0.0008667	0.3121	0.4503	0.3872	0.4993	Cplane2
0.0008664	0.2412	0.2652	1	0.4999	Vps25
0.0008645	1.532	2.257	0.002017	0.4965	Gm48768
0.0008631	0.227	0.2467	1	0.4999	Gm29542
0.0008628	0.1135	0.07401	0.8389	0.5002	Cldn1
0.0008626	0.08512	0.03084	0.2547	0.5003	Or2w6
0.0008624	0.1986	0.1789	1	0.5001	Psenen-ps
0.0008622	0.1561	0.1357	1	0.5001	Cdr1
0.0008614	0.08512	0.04934	0.7785	0.5002	ENSMUSG00000121005
0.0008582	2.057	3.152	4.313e-05	0.4948	Lxn
0.0008569	0.07093	0.01234	0.06389	0.5003	Gm16385
0.0008567	0.2128	0.2776	0.8856	0.4997	Tgm6
0.0008529	0.1419	0.1234	1	0.5001	4933416I08Rik
0.0008528	0.1135	0.09252	1	0.5001	Armh4
0.0008488	0.2837	0.4009	0.4975	0.4994	Vill
0.0008479	0.1702	0.1789	1	0.5	Nr2f2
0.0008454	0.1561	0.1357	1	0.5001	Galnt5
0.0008444	0.1986	0.1542	1	0.5002	Hspd1-ps3
0.0008444	0.1702	0.2097	1	0.4998	Gm15816
0.0008409	0.1419	0.111	1	0.5002	Gm13835
0.0008408	0.07093	0.03701	0.7008	0.5002	Or6c70
0.0008408	0.1419	0.1665	1	0.4999	Kdm6bos
0.0008394	0.3405	0.4379	0.7409	0.4995	Lbhd1
0.0008321	0.1419	0.1357	1	0.5	Gm38039
0.0008299	0.1702	0.2035	1	0.4998	Best1
0.0008252	0.8796	1.289	0.03231	0.498	Gm17494
0.0008245	0.0993	0.06168	0.8312	0.5002	Fgfr3-ps
0.0008234	0.3547	0.3947	1	0.4998	Gale
0.0008176	0.227	0.2652	1	0.4998	Csrnp3
0.0008163	1.348	2.017	0.002623	0.4967	Pdp1
0.0008106	0.08512	0.03084	0.2548	0.5003	Gm9134
0.0008104	0.1277	0.09869	1	0.5001	Prdm16os
0.0008084	0.1702	0.1727	1	0.5	Dcst1
0.0008055	0.0993	0.08018	1	0.5001	B230209E15Rik
0.0008052	0.0993	0.09869	1	0.5	Gm20463
0.0008028	0.1561	0.1974	1	0.4998	Syt12
0.0008027	0.0993	0.02467	0.05788	0.5004	Gm6793
0.0007974	0.1986	0.2591	0.9158	0.4997	Gm5089 - ENSMUSG00000064052
0.0007972	0.07093	0.03084	0.4931	0.5002	Gm44768
0.0007966	0.4398	0.6291	0.2574	0.4991	Gm11808
0.0007963	0.4114	0.5489	0.5051	0.4993	Tpt1-ps3
0.0007941	0.1702	0.1727	1	0.5	Depp1
0.0007904	0.1135	0.07401	0.8389	0.5002	Gm6722
0.0007875	0.1135	0.08635	1	0.5001	Gm15239
0.0007819	0.0993	0.06168	0.8313	0.5002	Rbm6-ps1
0.0007818	7.717	11.45	1.678e-12	0.4841	Tmx2
0.0007787	0.1844	0.1974	1	0.4999	Arfgef3
0.0007785	0.1419	0.1419	1	0.5	Gm9727
0.000778	2.88	4.54	1.26e-07	0.4922	Rrs1
0.0007751	0.08512	0.03084	0.2548	0.5003	Gm33321
0.0007726	0.08512	0.03701	0.4006	0.5002	Gm12328
0.0007709	0.2554	0.2899	1	0.4998	Rpl7a-ps12
0.0007708	0.05675	0.01234	0.1731	0.5002	Gm14269
0.0007706	0.2128	0.222	1	0.5	Gm4865
0.0007702	0.1561	0.1234	1	0.5002	H2ac4
0.000769	0.07093	0.03084	0.493	0.5002	Gm15484
0.0007623	0.6951	1.042	0.04713	0.4983	Gm13421
0.0007623	0.1135	0.1172	1	0.5	Gm34376
0.0007621	0.7377	1.049	0.0966	0.4985	Clec4a1
0.000762	0.05675	0.01234	0.1732	0.5002	Gm43698
0.0007601	0.1419	0.08635	0.6063	0.5003	Gm4596
0.0007582	0.05675	0.006168	0.05612	0.5003	4930553P18Rik
0.0007569	0.1277	0.1049	1	0.5001	Nefl
0.0007556	1.135	1.634	0.01832	0.4976	4930404A12Rik
0.0007553	0.5816	0.734	0.5585	0.4993	Gm16933
0.000755	2.185	3.306	4.418e-05	0.4946	Pop5
0.0007539	0.7519	0.9992	0.2416	0.4988	Gm17354
0.0007518	0.05675	0.0185	0.3706	0.5002	Gm29397
0.0007501	0.08512	0.03701	0.4008	0.5002	Gm7846
0.0007495	0.1135	0.09252	1	0.5001	Ddx4
0.0007434	0.2412	0.3146	0.8389	0.4996	Foxj1
0.000742	0.0993	0.05551	0.6491	0.5002	Apobec4
0.0007403	0.5958	0.8573	0.1337	0.4987	Zfp882
0.0007401	0.08512	0.04318	0.5774	0.5002	Gm12068
0.0007385	0.2837	0.4009	0.4969	0.4994	Gng11
0.0007376	0.1561	0.1419	1	0.5001	Nrgn
0.0007372	0.1702	0.1789	1	0.5	Gm7984
0.0007367	0.2837	0.3639	0.8389	0.4996	H2ac15
0.0007363	0.383	0.4811	0.7906	0.4995	Sox12
0.0007343	0.454	0.623	0.3651	0.4992	Rims1
0.0007328	0.1986	0.3022	0.4662	0.4995	Chad
0.0007317	0.1702	0.1665	1	0.5	Kif19b
0.0007308	0.2554	0.3084	1	0.4997	Gm16538
0.0007275	0.8796	1.369	0.008584	0.4976	Ttc30a1
0.0007264	0.1702	0.1665	1	0.5	ENSMUSG00000120857
0.0007249	0.0993	0.06168	0.8314	0.5002	Kcng3
0.0007236	2.014	2.887	0.001049	0.4958	Sspn
0.0007225	0.08512	0.07401	1	0.5001	Gm15756
0.0007214	0.1844	0.2159	1	0.4998	Snord3a - ENSMUSG00000106147
0.0007198	0.08512	0.07401	1	0.5001	Mrip-ps
0.0007183	0.1419	0.1357	1	0.5	Col12a1
0.0007176	6.1	9.061	1.353e-10	0.4869	Naxe
0.000717	0.0993	0.06785	0.9971	0.5002	Gm6180
0.0007169	0.9363	1.338	0.04278	0.498	Siglecg
0.0007121	0.1986	0.2344	1	0.4998	Gm7818
0.00071	0.07093	0.01234	0.06388	0.5003	Gm4950
0.0007058	0.5249	0.7525	0.1845	0.4989	Lrrtm3
0.0007001	2.44	3.719	9.547e-06	0.4939	4632415L05Rik
0.0006994	0.1277	0.1665	1	0.4998	Xirp1
0.0006974	0.2128	0.222	1	0.5	Gm8206
0.000697	0.0993	0.08018	1	0.5001	Gm14730
0.0006942	0.1561	0.1912	1	0.4998	Slc5a2
0.0006942	0.1277	0.1234	1	0.5	Rapgef3os1
0.0006933	0.08512	0.04934	0.7783	0.5002	Gm26953
0.0006927	0.1277	0.1234	1	0.5	Gm15550
0.00069	2.752	4.058	1.978e-05	0.4938	Ndufa11
0.0006895	0.1986	0.1912	1	0.5	Gm9762
0.0006885	0.6242	0.8512	0.2406	0.4989	Gm38316
0.0006881	0.5249	0.6723	0.5387	0.4993	Eif3j2
0.0006872	0.3121	0.3886	0.8977	0.4996	Has3
0.0006862	0.5391	0.7772	0.1621	0.4988	ENSMUSG00000121067
0.0006861	0.1419	0.1357	1	0.5	1700030E10Rik
0.0006822	0.227	0.2591	1	0.4998	Gm7887
0.0006783	1.107	1.702	0.003485	0.4971	Tmem177
0.0006783	0.07093	0.02467	0.3078	0.5002	Actl6b
0.0006783	0.2412	0.2652	1	0.4999	Gm5915
0.000678	0.0993	0.07401	1	0.5001	Wdr72
0.0006776	0.1135	0.1172	1	0.5	Omd
0.0006761	0.1561	0.1542	1	0.5	Fam219aos
0.0006757	0.1135	0.1049	1	0.5	Kcnj6
0.0006751	0.1986	0.2714	0.7846	0.4996	Sostdc1
0.0006737	0.227	0.3207	0.6105	0.4995	Gm43837
0.0006733	0.1277	0.1172	1	0.5001	Npr3
0.0006729	1.263	1.863	0.005831	0.4971	Vmac
0.0006729	0.2128	0.2837	0.8389	0.4996	Gm9892
0.0006705	0.07093	0.03701	0.7008	0.5002	4930434J06Rik
0.0006686	0.2412	0.3022	0.9932	0.4997	Gm47373
0.0006683	0.08512	0.07401	1	0.5001	Gm16172
0.0006678	0.1277	0.1542	1	0.4999	Bnip3l-ps
0.000662	0.4398	0.6106	0.3426	0.4992	H2bc3
0.0006606	0.1277	0.09252	1	0.5002	Cox5b-ps
0.0006579	0.1135	0.111	1	0.5	Gm7299
0.0006574	0.3688	0.5551	0.2132	0.4991	Fam167a
0.0006574	0.08512	0.07401	1	0.5001	Gm49435
0.0006563	0.08512	0.06168	1	0.5001	Gm16433
0.000656	1.717	2.547	0.0007602	0.496	Gprasp2
0.0006528	0.2695	0.3392	0.9157	0.4997	Dcdc2a
0.0006524	0.07093	0.0185	0.1582	0.5003	Gm10291
0.0006523	0.2412	0.3084	0.9018	0.4997	Msmp
0.0006495	0.08512	0.07401	1	0.5001	Hadhb-ps
0.0006474	0.1419	0.1542	1	0.4999	Bche
0.0006471	0.0993	0.06168	0.8312	0.5002	Gm44596
0.0006468	0.07093	0.0185	0.1583	0.5003	Gm48749
0.0006456	0.1277	0.1357	1	0.5	Fut7
0.0006455	0.1277	0.1172	1	0.5001	Stab2
0.0006449	0.0993	0.09869	1	0.5	Ppp1r36
0.000639	0.0993	0.08018	1	0.5001	Gm18101
0.0006387	10.13	15.19	8.673e-16	0.4797	Park7
0.0006379	0.08512	0.05551	0.966	0.5001	Gm49328
0.0006355	0.05675	0.02467	0.607	0.5002	Fcer2a
0.0006351	0.227	0.2652	1	0.4998	Wasf1
0.0006342	0.1419	0.1295	1	0.5001	Ccdc120
0.0006342	0.0993	0.07401	1	0.5001	Lrrn4
0.0006333	0.3547	0.4318	0.9431	0.4996	1500026H17Rik
0.0006317	0.383	0.4811	0.7896	0.4995	Tmed2b
0.0006317	0.3972	0.5674	0.3076	0.4992	Gm1604a
0.0006301	0.04256	0.006168	0.1706	0.5002	Gm48908
0.0006301	0.1277	0.09869	1	0.5001	ENSMUSG00000120062
0.0006286	0.04256	0.01234	0.4257	0.5002	Gm10356
0.0006272	0.05675	0.01234	0.1731	0.5002	Gm10654
0.0006267	0.07093	0.04318	0.9158	0.5001	Gm16364 - ENSMUSG00000087014
0.000624	0.2128	0.3454	0.2937	0.4993	Tubb1
0.0006212	0.1844	0.2159	1	0.4998	Gm11592
0.0006207	0.1986	0.222	1	0.4999	Mrap2
0.0006203	0.05675	0.006168	0.05613	0.5003	Gm33206
0.0006195	0.07093	0.02467	0.3077	0.5002	Gm16072
0.0006194	0.2128	0.2837	0.8389	0.4996	Gm11290
0.0006193	0.07093	0.03084	0.4931	0.5002	Gm35722
0.0006189	0.1277	0.1172	1	0.5001	Gm42457
0.0006185	0.1135	0.1049	1	0.5	Kcnc1
0.0006169	0.2695	0.3269	1	0.4997	Gm36371
0.0006155	0.07093	0.03084	0.4931	0.5002	1700057H15Rik
0.0006151	0.05675	0.05551	1	0.5	Gm13204
0.000614	0.04256	0.01234	0.4258	0.5002	Ppbp
0.000612	0.454	0.6476	0.252	0.499	Adamts7
0.0006116	0.2554	0.4009	0.2798	0.4993	ENSMUSG00000120949
0.0006103	0.0993	0.06168	0.8318	0.5002	Adad1
0.0006083	0.2695	0.3639	0.6638	0.4995	ENSMUSG00000120164
0.0006081	0.1277	0.1419	1	0.4999	Gm29103
0.0006078	0.2412	0.3269	0.7065	0.4996	C730002L08Rik
0.0006074	0.1277	0.148	1	0.4999	Miat
0.0006052	0.0993	0.1172	1	0.4999	9930004E17Rik
0.0006047	0.3972	0.6106	0.1486	0.4989	F5
0.0006032	0.1986	0.2529	1	0.4997	Rassf7
0.0006022	0.4398	0.7093	0.06385	0.4987	Gm47889
0.0006001	0.0993	0.1295	1	0.4998	Trp63
0.0005996	0.1277	0.1604	1	0.4998	Ccdc89
0.000599	0.1135	0.1295	1	0.4999	Krt18
0.0005982	0.07093	0.04934	1	0.5001	Gstm2
0.0005982	0.05675	0.03084	0.8452	0.5001	Gm13665
0.0005978	0.1135	0.148	1	0.4998	Myt1
0.0005972	0.05675	0.04318	1	0.5001	Camsap3
0.0005965	0.3121	0.4873	0.2054	0.4991	Rgcc
0.0005962	0.227	0.3084	0.7338	0.4996	Gm20518
0.0005956	0.2412	0.3084	0.9013	0.4997	Gm31812
0.0005954	0.07093	0.06168	1	0.5	Rab15
0.0005938	0.1277	0.1419	1	0.4999	Gm8186
0.0005929	0.2128	0.2529	1	0.4998	Gm10705
0.0005922	0.1702	0.2282	0.8942	0.4997	1110002J07Rik
0.0005913	0.04256	0.006168	0.1706	0.5002	Gm48746
0.0005913	0.1135	0.148	1	0.4998	ENSMUSG00000120410
0.0005905	0.1986	0.2282	1	0.4999	Gm34934
0.0005901	0.08512	0.05551	0.9657	0.5001	H4c17
0.0005884	0.08512	0.05551	0.9658	0.5001	Padi3
0.0005883	0.07093	0.04318	0.9158	0.5001	Rps25-ps1
0.0005874	0.07093	0.06785	1	0.5	Klc3
0.0005871	0.0993	0.07401	1	0.5001	Gm49416
0.000586	0.07093	0.03084	0.4931	0.5002	Gm35101
0.000585	0.0993	0.09252	1	0.5	Zfp804a
0.0005833	0.2837	0.3392	1	0.4997	Ppp1r14a
0.0005831	0.1135	0.1295	1	0.4999	Gm17597
0.0005829	0.1135	0.1049	1	0.5	Gm4735
0.0005783	0.05675	0.02467	0.607	0.5002	Gm38224
0.0005771	0.1135	0.1234	1	0.5	Usp13
0.000577	0.05675	0.04934	1	0.5	Mmp17
0.0005769	0.07093	0.03701	0.701	0.5002	Atp5pb-ps
0.0005762	0.07093	0.03701	0.7008	0.5002	1700016B15Rik
0.0005756	0.07093	0.03701	0.7008	0.5002	Aplnr
0.0005753	0.08512	0.07401	1	0.5001	Gm48715
0.0005703	0.08512	0.09869	1	0.4999	Cgn
0.0005693	0.5107	0.7957	0.06597	0.4986	Clic5
0.0005685	0.0993	0.08018	1	0.5001	Gm26800
0.0005684	0.3972	0.5243	0.5586	0.4994	Slc18a2
0.0005684	0.05675	0.04318	1	0.5001	Gm18562
0.0005677	0.1277	0.1295	1	0.5	4930516B21Rik
0.0005659	0.1419	0.148	1	0.5	ENSMUSG00000120837
0.0005657	0.2128	0.2837	0.8389	0.4996	Cpt1c
0.0005657	0.08512	0.05551	0.966	0.5001	Arc
0.000564	0.0993	0.06785	0.9979	0.5002	Cdv3-ps
0.0005609	0.04256	0.01234	0.4257	0.5002	Gm15900
0.0005604	0.04256	0.03084	1	0.5001	Lrrc3b
0.0005602	0.05675	0.01234	0.1731	0.5002	Gm48075
0.0005601	0.04256	0.006168	0.1706	0.5002	Gm15790
0.0005601	0.0993	0.06168	0.832	0.5002	Fam81b
0.00056	0.05675	0.03084	0.8452	0.5001	Gm11942
0.0005586	0.07093	0.06785	1	0.5	Gm42742
0.0005582	0.07093	0.03701	0.7013	0.5002	Gm16596
0.0005574	0.2979	0.4318	0.3969	0.4993	9330188P03Rik
0.0005564	2.256	3.485	9.608e-06	0.4941	Imp3
0.000553	3.447	5.15	5.965e-07	0.4921	Nop10
0.0005521	0.2554	0.3022	1	0.4998	Gm32017
0.0005502	0.07093	0.05551	1	0.5001	Gm19026
0.0005466	0.4965	0.7463	0.1154	0.4988	Smim24
0.0005461	0.05675	0.03084	0.8452	0.5001	Gm10080
0.0005458	0.05675	0.06168	1	0.5	Clec18a
0.0005455	0.1702	0.185	1	0.4999	Gm1335
0.0005453	0.837	1.332	0.006412	0.4976	Cyyr1
0.0005445	0.1135	0.1357	1	0.4999	Rph3al
0.0005441	0.07093	0.06168	1	0.5	Gm10320
0.0005426	0.07093	0.05551	1	0.5001	Cfap276
0.0005425	0.08512	0.04934	0.7785	0.5002	Zfp936
0.0005416	0.1419	0.1357	1	0.5	Chpf
0.0005414	0.1277	0.1789	0.8897	0.4997	Gsg1l
0.0005412	0.08512	0.07401	1	0.5001	4930549P19Rik
0.0005409	0.1135	0.08018	1	0.5002	Gm54754
0.0005403	0.08512	0.08635	1	0.5	Abcg4
0.0005395	0.08512	0.06785	1	0.5001	Exoc3l
0.0005388	0.04256	0.0185	0.7498	0.5001	Nfe2
0.0005383	0.5107	0.808	0.05252	0.4985	Mir703
0.0005383	0.1986	0.2282	1	0.4999	Gm38431
0.0005381	0.08512	0.06785	1	0.5001	Gm14703
0.0005372	0.2128	0.2837	0.8389	0.4996	Syde1
0.0005369	0.1135	0.1172	1	0.5	Nrsn1
0.0005369	0.1277	0.1357	1	0.5	Gm12523
0.0005362	0.1135	0.1049	1	0.5	Cubn
0.0005361	0.04256	0.0185	0.7498	0.5001	Tspyl5
0.0005358	0.5107	0.8018	0.05952	0.4986	Gm26708
0.0005347	0.02837	0.01234	0.9158	0.5001	A730089K16Rik
0.0005346	0.04256	0.0185	0.7498	0.5001	Gm49470
0.0005335	0.1986	0.2652	0.8389	0.4997	Sox15
0.0005318	0.3263	0.4441	0.5465	0.4994	Gm47639
0.0005304	0.1135	0.148	1	0.4998	Spsb4
0.0005274	0.1844	0.2097	1	0.4999	Rbm8a2
0.0005271	0.07093	0.06168	1	0.5	Gm2986
0.0005249	0.04256	0.02467	1	0.5001	Fgf9
0.0005243	0.1135	0.1172	1	0.5	Hey2
0.0005218	0.227	0.3084	0.7329	0.4996	Gm10252
0.0005207	0.01419	0.006168	1	0.5	Slc4a1
0.0005205	0.05675	0.04318	1	0.5001	Tex15
0.0005174	0.0993	0.1357	1	0.4998	Pam16l
0.000516	0.0993	0.09869	1	0.5	Spata9
0.0005157	0.1419	0.1604	1	0.4999	Stxbp3-ps
0.0005138	0.1561	0.2405	0.5537	0.4996	Zfp365
0.0005138	0.0993	0.08635	1	0.5001	Gm37849
0.0005137	0.9363	1.412	0.01341	0.4977	Copz2
0.0005135	0.2554	0.3146	1	0.4997	Stk33
0.0005125	0.04256	0.01234	0.4257	0.5002	ENSMUSG00000120948
0.000512	0.1986	0.2405	1	0.4998	Fhad1os2
0.0005115	0.04256	0.02467	1	0.5001	Mas1
0.0005113	0.08512	0.06785	1	0.5001	Gm12828
0.0005112	0.07093	0.03701	0.701	0.5002	Tubg2
0.0005107	0.4682	0.66	0.2689	0.4991	Yjefn3
0.0005104	0.07093	0.07401	1	0.5	Gm5176
0.0005101	0.4114	0.5798	0.3285	0.4992	A930007A09Rik
0.0005089	0.1419	0.1604	1	0.4999	Cnga2
0.0005084	0.0993	0.08635	1	0.5001	Lhcgr
0.0005083	5.589	8.179	2.96e-09	0.4884	Cebpd
0.0005076	0.3547	0.4873	0.4732	0.4993	Cplx2
0.0005073	1.844	2.825	0.000111	0.4953	Tmem223
0.0005057	0.04256	0.006168	0.1706	0.5002	Gm14056
0.0005054	5.66	8.37	8.736e-10	0.4879	Hypk
0.0005053	0.04256	0	0.03205	0.5002	Gm12095
0.0005052	0.04256	0.01234	0.4257	0.5002	Gm9877
0.0005048	0.0993	0.1049	1	0.5	Gm14586
0.0005044	0.04256	0.006168	0.1706	0.5002	Gm11793
0.000504	0.08512	0.08635	1	0.5	Tekt4
0.0005037	0.02837	0	0.1098	0.5001	4930500L23Rik
0.0005033	0.227	0.3022	0.812	0.4996	Xlr5a
0.0005023	0.7235	1.042	0.08119	0.4984	D930028M14Rik
0.0005022	0.04256	0.006168	0.1706	0.5002	Rpl31-ps9
0.0005017	0.04256	0.0185	0.7498	0.5001	Gm43122
0.0005017	0.0993	0.08018	1	0.5001	Gm25432
0.0005013	0.04256	0.01234	0.4257	0.5002	Gm3222
0.0005008	0.1561	0.2282	0.6889	0.4996	Emilin2
0.0005008	0.07093	0.03084	0.4931	0.5002	Gm6494
0.0005007	0.1561	0.1912	1	0.4998	E430002N23Rik
0.0004999	1.986	3.22	2.814e-06	0.4941	Thtpa
0.000499	0.04256	0.006168	0.1706	0.5002	Gm4849
0.0004983	0.05675	0.04318	1	0.5001	Gm379
0.0004979	0.04256	0.02467	1	0.5001	4930524C18Rik
0.0004977	0.04256	0.01234	0.4257	0.5002	Gm50047
0.0004968	0.1135	0.1172	1	0.5	Gm12428
0.0004967	0.08512	0.06168	1	0.5001	Dpp4
0.0004965	0.07093	0.07401	1	0.5	Gm28192
0.0004961	0.08512	0.07401	1	0.5001	Gm7832
0.0004934	0.05675	0.02467	0.607	0.5002	Spata45
0.0004929	0.1277	0.1172	1	0.5001	Agtr1a
0.0004921	0.05675	0.03084	0.8452	0.5001	Gm16437
0.0004918	0.02837	0.006168	0.4806	0.5001	Vax2os
0.0004918	0.3121	0.4441	0.4248	0.4993	A430057M04Rik
0.0004915	0.1277	0.148	1	0.4999	BC065403
0.0004907	0.07093	0.04934	1	0.5001	ENSMUSG00000120299
0.0004906	0.05675	0.02467	0.6071	0.5002	Gm38283
0.0004903	0.05675	0.02467	0.607	0.5002	Fcna
0.0004886	0.1702	0.222	0.9955	0.4997	F13a1
0.0004877	0.08512	0.08018	1	0.5	Ppp1r32
0.0004875	0.4965	0.7031	0.2338	0.499	Gm45449
0.0004872	0.04256	0.0185	0.7498	0.5001	Shc2
0.0004872	0.04256	0.006168	0.1706	0.5002	E230034D01Rik
0.000486	0.05675	0.01234	0.1732	0.5002	Gm42557
0.0004851	0.1561	0.1789	1	0.4999	Gm5905
0.0004843	1.277	1.863	0.007614	0.4972	Coa4
0.0004842	0.1135	0.1419	1	0.4999	Tslp
0.0004832	0.1419	0.1665	1	0.4999	Gm26811
0.0004832	0.04256	0.01234	0.4257	0.5002	Gm50263
0.0004831	0.05675	0.03701	1	0.5001	F2
0.0004831	0.04256	0.02467	1	0.5001	Gm13857
0.000483	0.07093	0.03701	0.701	0.5002	Gm10131
0.0004821	0.07093	0.07401	1	0.5	Zim1
0.0004812	0.07093	0.06168	1	0.5	Scn11a
0.0004809	0.08512	0.1049	1	0.4999	ENSMUSG00000120727
0.0004806	0.04256	0.04318	1	0.5	Gfra2
0.0004803	0.08512	0.08018	1	0.5	Gm38080
0.0004796	0.1135	0.111	1	0.5	Mei4
0.0004767	14.03	20.92	1.851e-18	0.4748	Adprh
0.0004766	0.04256	0.02467	1	0.5001	Gm6974
0.000476	0.08512	0.06785	1	0.5001	Nefm
0.0004753	0.08512	0.1234	0.9892	0.4998	Radil
0.000475	1.121	1.684	0.006401	0.4973	Timm10
0.0004746	0.02837	0	0.1098	0.5001	Gm42402
0.0004729	0.04256	0.01234	0.4257	0.5002	ENSMUSG00000120839
0.0004716	0.2128	0.2776	0.8854	0.4997	Egflam
0.0004713	0.1135	0.1172	1	0.5	Grin1
0.0004711	0.07093	0.06785	1	0.5	Foxred2
0.0004697	0.1844	0.2529	0.8125	0.4997	Hoxb3
0.0004691	0.04256	0.0185	0.7498	0.5001	Gm6505
0.000469	0.1135	0.1789	0.6576	0.4997	Gm20743
0.000469	0.05675	0.03084	0.8452	0.5001	Gm49097
0.0004689	0.3405	0.5366	0.1587	0.499	Cdh12
0.0004685	0.04256	0.0185	0.7498	0.5001	4933411O13Rik
0.0004667	0.04256	0.02467	1	0.5001	Gm17041
0.0004657	0.02837	0	0.1098	0.5001	Gm50028
0.000465	0.2979	0.4503	0.2977	0.4992	Gm10309
0.0004643	0.04256	0.03701	1	0.5	Rps10-ps1
0.0004641	0.2128	0.3084	0.5636	0.4995	Sh3gl3
0.0004637	0.05675	0.02467	0.607	0.5002	Gas2l2
0.0004637	0.1277	0.1542	1	0.4999	Gm9385
0.0004635	0.05675	0.02467	0.6071	0.5002	Bambi-ps1
0.0004631	0.04256	0.0185	0.7498	0.5001	Gm29154
0.000463	0.04256	0.0185	0.7498	0.5001	Gm1818
0.0004622	0.1561	0.185	1	0.4999	Fbxo15
0.0004619	0.2128	0.3269	0.4043	0.4994	Sh3rf3
0.0004613	0.04256	0.0185	0.7498	0.5001	Gm20501
0.0004609	0.383	0.5674	0.233	0.4991	Ldhd
0.0004607	0.1135	0.1049	1	0.5	Gm11651
0.0004605	0.1135	0.1172	1	0.5	Gm5592
0.0004583	0.08512	0.07401	1	0.5001	Rpl3-ps1
0.000458	0.05675	0.03084	0.8452	0.5001	Ldlrad2
0.0004577	0.08512	0.06785	1	0.5001	ENSMUSG00000121508
0.0004571	0.05675	0.04318	1	0.5001	Gm30694
0.0004559	0.07093	0.04934	1	0.5001	Ptpn7
0.0004558	0.04256	0.02467	1	0.5001	Gm5166
0.0004556	0.05675	0.05551	1	0.5	Gm49863
0.0004553	0.02837	0.006168	0.4806	0.5001	Gp5
0.0004552	0.1135	0.09252	1	0.5001	Smarca5-ps
0.0004548	0.2695	0.3639	0.6638	0.4995	Unc80
0.0004548	0.04256	0.0185	0.7498	0.5001	Gm13611
0.0004547	0.05675	0.0185	0.3707	0.5002	Hmgb1-ps2
0.0004546	0.02837	0	0.1098	0.5001	Gm12322
0.0004538	0.07093	0.06168	1	0.5	3110070M22Rik
0.0004538	0.05675	0.04934	1	0.5	Gm29296
0.0004534	0.1277	0.1357	1	0.5	Edn3
0.0004531	0.02837	0.01234	0.9158	0.5001	Mb
0.0004528	0.1419	0.1727	1	0.4998	Gm49760
0.0004527	2.171	3.269	5.848e-05	0.4947	Kctd12b
0.0004526	0.07093	0.09252	1	0.4999	Styx-ps
0.0004513	0.1561	0.1789	1	0.4999	Kif26a
0.0004506	0.0993	0.09869	1	0.5	Pdxp
0.0004496	0.9363	1.388	0.02017	0.4978	Podxl
0.0004496	0.05675	0.04934	1	0.5	Gm28782
0.0004494	0.02837	0.01234	0.9158	0.5001	Nell1os
0.0004488	0.9789	1.425	0.02494	0.4978	Alkbh7
0.000448	0.04256	0	0.03205	0.5002	Gm4575
0.000448	0.05675	0.0185	0.3708	0.5002	Gm7935
0.0004469	3.816	5.847	1.735e-08	0.4906	Ovca2
0.0004469	0.05675	0.02467	0.607	0.5002	Gm13780
0.0004463	0.05675	0.04934	1	0.5	Csprs
0.0004461	0.05675	0.04934	1	0.5	Gm36401
0.000445	0.05675	0.04318	1	0.5001	Gm7536
0.0004447	0.0993	0.08635	1	0.5001	Mctp2
0.0004442	0.02837	0	0.1098	0.5001	Gm5517
0.0004429	0.1277	0.111	1	0.5001	Gm7879
0.0004422	0.02837	0	0.1098	0.5001	Gm17657
0.0004416	0.08512	0.07401	1	0.5001	Gm47076
0.0004406	0.07093	0.05551	1	0.5001	3930402G23Rik
0.0004399	5.065	7.574	1.685e-09	0.4887	Ndufa8
0.0004395	0.04256	0.02467	1	0.5001	Gm38575
0.0004386	0.0993	0.1234	1	0.4999	Gpr173
0.0004384	0.02837	0.01234	0.9158	0.5001	Bpifb1
0.0004376	0.05675	0.03701	1	0.5001	Tfpi2
0.0004371	0.04256	0.02467	1	0.5001	B630019K06Rik
0.000437	0.07093	0.05551	1	0.5001	Lat
0.0004367	0.0993	0.08018	1	0.5001	Rtraf-ps
0.0004361	0.1135	0.1172	1	0.5	Gm38300
0.000436	1.717	2.671	9.996e-05	0.4954	Eif2b1
0.000436	0.07093	0.04318	0.9158	0.5001	Gm6368
0.0004354	0.04256	0.0185	0.7498	0.5001	Grb7
0.0004347	0.05675	0.03084	0.8452	0.5001	Gm5425
0.0004336	0.04256	0.03084	1	0.5001	Gm35974
0.0004331	0.05675	0.05551	1	0.5	Gpi-ps
0.0004325	0.6951	1.123	0.01134	0.4979	Dcdc2b
0.0004324	0.1561	0.222	0.7751	0.4997	Flt4
0.0004317	0.2128	0.2714	0.9766	0.4997	Ncmap
0.0004307	0.07093	0.04934	1	0.5001	Dcn
0.0004299	0.04256	0.02467	1	0.5001	Gm47542
0.0004292	0.02837	0	0.1098	0.5001	Gm5599
0.0004291	0.04256	0.03701	1	0.5	ENSMUSG00000120132
0.0004282	0.02837	0.006168	0.4806	0.5001	Gm23144
0.0004279	0.0993	0.1049	1	0.5	Rps24-ps3
0.0004279	0.1561	0.2282	0.6888	0.4996	Gm22513
0.0004273	0.05675	0.04934	1	0.5	Rab25
0.0004265	0.02837	0	0.1098	0.5001	ENSMUSG00000120812
0.000426	0.07093	0.04934	1	0.5001	Klk10
0.0004254	0.1135	0.1172	1	0.5	Rnase12
0.0004237	0.07093	0.05551	1	0.5001	Rpl27-ps2
0.0004236	0.02837	0	0.1098	0.5001	Gm37416
0.0004232	0.05675	0.03084	0.8452	0.5001	Gm21680
0.0004227	0.07093	0.06168	1	0.5	Gipc3
0.0004227	0.1277	0.185	0.8279	0.4997	Gm17035
0.0004221	0.05675	0.04318	1	0.5001	Zdbf2
0.0004218	0.04256	0.02467	1	0.5001	ENSMUSG00000120551
0.0004216	0.1135	0.1665	0.8389	0.4997	1700012B09Rik
0.0004201	0.04256	0.01234	0.4257	0.5002	Gm6485
0.0004196	0.02837	0	0.1098	0.5001	Gm5463
0.0004192	0.04256	0.0185	0.7498	0.5001	Snhg18
0.0004191	0.05675	0.07401	1	0.4999	Gm21963
0.0004184	0.07093	0.05551	1	0.5001	Gm14409
0.0004184	0.2128	0.2591	1	0.4998	H3c7
0.000417	0.05675	0.03084	0.8452	0.5001	4933430L12Rik
0.000415	0.02837	0	0.1098	0.5001	Rpsa-ps4
0.0004145	0.04256	0.0185	0.7498	0.5001	Rybp-ps
0.0004138	1.475	2.282	0.000432	0.4961	Amer2
0.0004135	0.02837	0.02467	1	0.5	Rapgef3os2
0.0004121	0.3121	0.4256	0.5642	0.4994	Gm21596
0.0004119	0.04256	0.03084	1	0.5001	Hsbp1l1
0.0004118	0.01419	0	0.3793	0.5001	Epb42
0.0004112	0.02837	0.0185	1	0.5	9130410C08Rik
0.0004097	0.1135	0.1234	1	0.5	Il10
0.0004097	0.01419	0.01234	1	0.5	Hemgn
0.0004095	0.05675	0.04318	1	0.5001	Gm15948
0.0004095	0.04256	0.02467	1	0.5001	Gm29650
0.0004079	0.08512	0.09252	1	0.5	Erich2
0.000407	0.04256	0.006168	0.1706	0.5002	B3gnt4
0.0004069	0.05675	0.04934	1	0.5	Gm39185
0.0004066	0.04256	0.0185	0.7498	0.5001	Piwil4
0.0004064	0.6668	0.9005	0.2419	0.4988	Gm49172
0.0004057	0.3405	0.4564	0.5779	0.4994	Gm50340
0.0004055	0.04256	0.03084	1	0.5001	Dmrt1
0.0004053	0.1135	0.1049	1	0.5	Alkbh3os1
0.0004051	0.2695	0.3639	0.6638	0.4995	Gm12184
0.0004045	0.08512	0.09252	1	0.5	Gm3696
0.0004044	0.04256	0.006168	0.1706	0.5002	Gm8616
0.0004043	0.04256	0.01234	0.4257	0.5002	Gm48483
0.000404	0.07093	0.06785	1	0.5	Pcdhb17
0.0004039	0.04256	0.0185	0.7498	0.5001	Gm12508
0.0004035	0.02837	0	0.1098	0.5001	Wfdc18
0.0004031	0.0993	0.1049	1	0.5	Gm12734
0.0004029	0.1135	0.1234	1	0.5	Gm4149
0.0004027	0.04256	0.02467	1	0.5001	Naaladl1
0.0004024	0.08512	0.08635	1	0.5	1700030N03Rik
0.0004021	0.1277	0.1542	1	0.4999	Syt7
0.0004015	0.04256	0.0185	0.7498	0.5001	Barhl1
0.0004013	0.04256	0.0185	0.7498	0.5001	Gm13378
0.0004001	0.04256	0.02467	1	0.5001	Or14j4
0.0004	0.07093	0.05551	1	0.5001	Ceacam18
0.0004	0.02837	0.006168	0.4806	0.5001	Serpinb6e
0.0004	0.05675	0.0185	0.3706	0.5002	Gm44793
0.0003997	0.1419	0.2097	0.7047	0.4997	Gstm7
0.0003996	0.02837	0	0.1098	0.5001	Gm597
0.0003995	0.02837	0.006168	0.4806	0.5001	4833407H14Rik
0.0003989	0.1419	0.185	1	0.4998	Gm42521
0.0003988	0.02837	0.01234	0.9158	0.5001	Rbpjl
0.0003984	0.1277	0.1542	1	0.4999	Gpr150
0.0003983	0.0993	0.1172	1	0.4999	Col6a5
0.0003983	0.07093	0.06785	1	0.5	H2bc15
0.0003979	0.04256	0.0185	0.7498	0.5001	Gm43803
0.0003978	0.04256	0.006168	0.1706	0.5002	Mrpl48-ps
0.0003976	1.291	1.992	0.00123	0.4966	Nptxr
0.0003976	0.04256	0.02467	1	0.5001	Gm13194
0.0003975	0.07093	0.06785	1	0.5	Gm42573
0.0003974	0.02837	0.006168	0.4806	0.5001	Ppp2r2cos
0.0003972	0.05675	0.05551	1	0.5	Gm18284
0.000397	0.1277	0.1542	1	0.4999	ENSMUSG00000079190
0.0003965	0.0993	0.1234	1	0.4999	Pzp
0.0003963	0.1419	0.2035	0.8011	0.4997	Gm20483
0.0003952	6.058	9.159	1.466e-11	0.4863	Pold4
0.0003949	0.05675	0.04318	1	0.5001	Gm41230
0.0003945	0.05675	0.04934	1	0.5	Gm44636
0.0003941	0.1844	0.2405	0.9522	0.4997	A230005M16Rik
0.000394	0.04256	0.02467	1	0.5001	Srpx
0.0003937	0.05675	0.04318	1	0.5001	Gm37245
0.0003913	0.04256	0.0185	0.7498	0.5001	Gm9001
0.0003892	0.02837	0	0.1098	0.5001	Gm12287
0.0003891	0.04256	0.02467	1	0.5001	Gm47823
0.0003888	0.1561	0.1665	1	0.4999	Ephb6
0.0003888	0.1277	0.1604	1	0.4998	Slc19a3
0.0003887	0.08512	0.09252	1	0.5	Gm7962
0.0003878	0.04256	0.0185	0.7498	0.5001	Or12d12
0.0003877	0.3263	0.4503	0.5024	0.4994	Snap25
0.0003877	0.04256	0.04318	1	0.5	Ret
0.0003876	0.02837	0.01234	0.9158	0.5001	Gm7331
0.0003874	0.02837	0.0185	1	0.5	Ankle1
0.0003869	0.04256	0.03701	1	0.5	2310016G11Rik
0.0003868	0.08512	0.09252	1	0.5	Rasl10b
0.0003867	0.04256	0.02467	1	0.5001	Gm15784
0.0003865	0.1986	0.2652	0.8389	0.4997	Icam2
0.0003861	0.08512	0.1172	1	0.4998	Igdcc3
0.0003854	0.1561	0.1974	1	0.4998	Gm9392
0.0003845	0.9647	1.523	0.003604	0.4973	Pop7
0.0003845	0.04256	0.03084	1	0.5001	Gm42789
0.000384	0.04256	0.02467	1	0.5001	Ddi1
0.0003836	0.1561	0.2035	1	0.4998	Gm43703
0.0003826	0.227	0.2591	1	0.4998	Ascl2
0.0003824	0.02837	0.0185	1	0.5	Depdc1a
0.0003824	0.04256	0.03084	1	0.5001	Gm43647
0.0003818	0.02837	0.0185	1	0.5	Gm8579
0.0003806	0.04256	0.03084	1	0.5001	Myct1
0.0003802	0.3405	0.5119	0.2482	0.4991	Tas1r3
0.0003799	0.4398	0.7155	0.05616	0.4986	Selenom
0.0003795	0.227	0.3207	0.6098	0.4995	Gm13817
0.0003784	0.02837	0.006168	0.4806	0.5001	Cmtm2b
0.0003783	0.04256	0.01234	0.4257	0.5002	Ramp3
0.0003782	0.02837	0.006168	0.4806	0.5001	Gm14440
0.0003782	0.04256	0.03701	1	0.5	A330074H02Rik
0.0003777	0.07093	0.05551	1	0.5001	Gm33981
0.0003772	0.1844	0.2652	0.6576	0.4996	Gm26673
0.0003769	0.04256	0.03084	1	0.5001	Cutal
0.0003766	0.02837	0.006168	0.4806	0.5001	Gm3654
0.0003762	0.454	0.6291	0.3331	0.4991	Flt3l
0.0003757	0.2554	0.3331	0.8351	0.4996	Gm43415
0.0003756	0.2128	0.3146	0.5119	0.4995	Rab19
0.0003754	0.04256	0.03084	1	0.5001	Gm49803
0.0003753	0.07093	0.08018	1	0.5	Bace2
0.0003744	0.04256	0.03084	1	0.5001	Gm54696
0.0003742	0.04256	0.04318	1	0.5	Trmt112-ps2
0.0003739	0.02837	0.01234	0.9158	0.5001	Gm6375
0.0003737	0.02837	0.0185	1	0.5	Gm16026
0.0003735	0.01419	0	0.3793	0.5001	Gypa
0.0003733	0.02837	0.006168	0.4806	0.5001	Gm9962
0.0003727	0.07093	0.05551	1	0.5001	Gm7389
0.0003727	0.1844	0.2344	1	0.4998	Gm3854
0.0003726	1.816	2.8	9.192e-05	0.4953	Guk1
0.0003725	0.3263	0.4318	0.6576	0.4995	Ufsp1
0.0003715	0.1277	0.1727	1	0.4998	Gm4900
0.0003704	0.02837	0.04318	1	0.4999	Rpsa-ps10
0.0003697	0.04256	0	0.03205	0.5002	ENSMUSG00000120011
0.0003694	0.02837	0.0185	1	0.5	Gm3693
0.0003691	0.04256	0.03701	1	0.5	Gm45604
0.0003689	0.07093	0.06168	1	0.5	Gm15522
0.0003684	0.1561	0.2282	0.6886	0.4996	Sod3
0.0003681	0.05675	0.04934	1	0.5	Cox7b2
0.0003676	0.01419	0.01234	1	0.5	Mmrn1
0.0003668	0.04256	0.0185	0.7498	0.5001	Gm45908
0.0003657	0.05675	0.03701	1	0.5001	Nxf2
0.0003654	0.04256	0.02467	1	0.5001	ENSMUSG00000120264
0.0003652	0.1135	0.1295	1	0.4999	Capn9
0.000365	0.07093	0.09252	1	0.4999	Gm42503
0.0003649	0.02837	0.006168	0.4806	0.5001	Gm30489
0.0003644	0.07093	0.06168	1	0.5	Emp1
0.0003643	0.04256	0.01234	0.4257	0.5002	Gm44618
0.0003642	0.02837	0.006168	0.4806	0.5001	Rbx1-ps
0.0003625	0.1277	0.1604	1	0.4998	Gm54621
0.0003623	0.04256	0.02467	1	0.5001	Gm14398
0.000362	0.1135	0.1357	1	0.4999	Fam171a2
0.0003619	0.02837	0	0.1098	0.5001	H2ac18
0.0003618	0.07093	0.111	0.8808	0.4998	Sox21
0.0003615	0.02837	0	0.1098	0.5001	Gm11642
0.000361	0.227	0.3146	0.6612	0.4996	Rnf182
0.0003605	0.07093	0.08635	1	0.4999	Rab27b
0.00036	0.07093	0.09252	1	0.4999	Fbxo16
0.0003598	0.02837	0.0185	1	0.5	Spta1
0.0003598	0.02837	0.006168	0.4806	0.5001	Gm16339
0.0003595	0.07093	0.05551	1	0.5001	Vmn1r88
0.0003587	0.01419	0	0.3793	0.5001	Gm15467
0.0003583	0.2128	0.2652	1	0.4997	Gm47210
0.0003577	0.1702	0.2344	0.8389	0.4997	Meikin
0.0003572	0.1135	0.148	1	0.4998	Terc - ENSMUSG00000118406
0.0003564	0.1844	0.2714	0.5932	0.4996	Lrrc24
0.000355	0.02837	0	0.1098	0.5001	Gm47199
0.0003548	0.04256	0.03084	1	0.5001	Scg2
0.0003548	0.04256	0.04318	1	0.5	Gm34312
0.0003542	0.02837	0.006168	0.4806	0.5001	Plekhs1
0.0003541	0.05675	0.06168	1	0.5	Gm6365
0.000354	0.04256	0.0185	0.7498	0.5001	Fam217a
0.0003535	0.0993	0.1049	1	0.5	Gm43158
0.0003533	0.383	0.5736	0.2082	0.4991	Pgap6
0.000353	0.05675	0.04318	1	0.5001	Gm10250
0.000353	0.02837	0.01234	0.9158	0.5001	Gm10608
0.0003526	0.04256	0.02467	1	0.5001	Rasd2
0.0003526	0.02837	0.0185	1	0.5	3110053B16Rik
0.0003521	0.07093	0.06785	1	0.5	Tyr
0.000352	0.04256	0.0185	0.7498	0.5001	Ugt3a1
0.0003512	3.575	5.459	6.571e-08	0.4912	Surf1
0.0003508	0.0993	0.09869	1	0.5	Samd11
0.0003506	0.1135	0.1234	1	0.5	Kank4
0.0003503	0.02837	0	0.1098	0.5001	Ces1a
0.0003501	0.05675	0.02467	0.6071	0.5002	Eif4a3l2
0.0003499	0.02837	0.006168	0.4806	0.5001	Tfap2b
0.0003494	0.04256	0.02467	1	0.5001	Gm47414
0.0003489	0.07093	0.06785	1	0.5	Gm48079
0.0003486	0.02837	0	0.1098	0.5001	Gm14244
0.0003483	0.1277	0.1727	1	0.4998	Scn3b
0.0003481	0.2128	0.3269	0.4043	0.4994	Gm56268
0.0003472	0.05675	0.06168	1	0.5	Matn1
0.0003472	0.04256	0.02467	1	0.5001	Gm13127
0.000347	0.02837	0.0185	1	0.5	Fbxw26
0.0003469	0.04256	0.0185	0.7498	0.5001	Gm47021
0.0003461	0.02837	0.01234	0.9158	0.5001	Gm44421
0.0003459	0.1277	0.148	1	0.4999	Kif20a
0.0003457	0.0993	0.1419	0.9521	0.4998	BC022960
0.0003456	0.02837	0.01234	0.9158	0.5001	Trim10
0.0003456	0.02837	0.01234	0.9158	0.5001	Gm13641
0.0003451	0.07093	0.08018	1	0.5	Ier5l
0.0003442	0.2695	0.3639	0.6638	0.4995	Pdzrn3
0.0003439	0.04256	0.02467	1	0.5001	Mroh2b
0.0003437	0.05675	0.06785	1	0.4999	A430010J10Rik
0.0003436	0.02837	0.0185	1	0.5	Rtn4r
0.0003436	0.04256	0.006168	0.1706	0.5002	Gm13453
0.0003434	1.121	1.715	0.003862	0.4971	Znhit2
0.0003433	0.8512	1.234	0.04475	0.4981	Dact3
0.0003429	0.04256	0.02467	1	0.5001	Gm5920
0.0003427	0.02837	0.006168	0.4806	0.5001	Gsdma2
0.0003424	0.04256	0.03084	1	0.5001	ENSMUSG00000120697
0.0003422	0.02837	0.0185	1	0.5	Gm46323
0.0003412	0.02837	0.03084	1	0.5	Cd226
0.0003408	0.04256	0.04318	1	0.5	Gm10128
0.0003404	0.1135	0.1295	1	0.4999	4930466K18Rik
0.0003402	0.08512	0.1049	1	0.4999	Gm5946
0.0003398	0.02837	0.01234	0.9158	0.5001	Eppk1
0.0003397	0.02837	0	0.1098	0.5001	C9
0.0003391	0.08512	0.08018	1	0.5	Gm18821
0.0003391	0.07093	0.06168	1	0.5	ENSMUSG00000120092
0.0003387	0.04256	0.01234	0.4257	0.5002	Cbx3-ps6
0.0003385	0.08512	0.09252	1	0.5	Odf3b
0.0003382	0.02837	0	0.1098	0.5001	Gm10268
0.0003377	0.02837	0.02467	1	0.5	Gm15414
0.0003376	0.1135	0.1172	1	0.5	Efcab3
0.0003372	0.02837	0	0.1098	0.5001	Gm9742
0.0003371	0.01419	0	0.3793	0.5001	Gm5761
0.0003368	0.05675	0.02467	0.6072	0.5002	Gm5555
0.0003366	0.08512	0.09869	1	0.4999	ENSMUSG00000120160
0.0003365	0.07093	0.08635	1	0.4999	Gm13680
0.000336	0.02837	0.006168	0.4806	0.5001	Gm7281
0.0003352	0.05675	0.04318	1	0.5001	Gm50138
0.0003348	0.1135	0.1604	0.9158	0.4998	Gm49171
0.0003346	0.0993	0.1604	0.6641	0.4997	Gm27153
0.0003336	0.04256	0.0185	0.7498	0.5001	Gm44226
0.0003334	0.1277	0.1912	0.7267	0.4997	Rps15a-ps4
0.000333	0.08512	0.111	1	0.4999	Gm1043
0.0003327	0.1277	0.1665	1	0.4998	Gm11821
0.0003322	0.02837	0.01234	0.9158	0.5001	Gm47337
0.0003321	0.02837	0.006168	0.4806	0.5001	Resp18
0.0003317	0.02837	0.0185	1	0.5	Aldh8a1
0.0003317	0.04256	0.03701	1	0.5	Gm21451
0.0003316	0.05675	0.04934	1	0.5	Gm5620
0.0003311	0.04256	0.02467	1	0.5001	Ift88os
0.0003304	0.1135	0.1357	1	0.4999	Reep6
0.0003303	0.05675	0.06785	1	0.4999	Tex52
0.0003302	0.08512	0.148	0.5935	0.4997	Sigirr
0.0003297	0.02837	0.0185	1	0.5	Gm8885
0.0003291	0.1277	0.1542	1	0.4999	Skint2
0.0003289	0.04256	0.01234	0.4257	0.5002	Gm10157
0.0003288	0.07093	0.09252	1	0.4999	Stmn3
0.0003287	0.2837	0.4626	0.167	0.4991	Enkd1
0.0003282	0.07093	0.07401	1	0.5	Gm4332
0.0003275	0.1419	0.1974	0.8565	0.4997	Col8a1
0.0003273	0.05675	0.05551	1	0.5	Hesx1
0.0003273	0.05675	0.05551	1	0.5	Gm12266
0.0003272	0.2837	0.3762	0.7038	0.4995	Gm16326
0.0003269	0.2412	0.4194	0.1328	0.4991	Gm10136
0.0003269	0.1702	0.185	1	0.4999	Smim18
0.0003268	0.1277	0.1789	0.8888	0.4997	Gm33843
0.0003264	0.05675	0.06168	1	0.5	Gm10054
0.0003261	0.01419	0	0.3793	0.5001	n-R5s88
0.0003259	0.02837	0.01234	0.9158	0.5001	Gm8203
0.0003257	0.04256	0.0185	0.7498	0.5001	Cstdc6
0.0003257	0.02837	0.0185	1	0.5	Gm15404
0.0003257	0.05675	0.04934	1	0.5	Gm54465
0.0003256	0.01419	0	0.3793	0.5001	Gm5845
0.0003251	0.1419	0.2035	0.8012	0.4997	AU021092
0.0003248	0.02837	0	0.1098	0.5001	Gm17511
0.0003247	0.0993	0.148	0.8389	0.4998	Lmx1b
0.0003247	0.05675	0.06785	1	0.4999	Ldhb-ps
0.0003244	0.7803	1.258	0.00664	0.4976	Nudt12
0.0003244	0.1702	0.2405	0.7518	0.4997	Slc23a1
0.0003244	0.05675	0.03701	1	0.5001	Gm14608
0.0003243	0.08512	0.08018	1	0.5	Gm4045
0.000324	0.04256	0.006168	0.1707	0.5002	Gm29687
0.0003236	0.04256	0.03701	1	0.5	Gm28675
0.0003236	0.02837	0	0.1098	0.5001	Gm2225
0.0003236	0.02837	0.006168	0.4806	0.5001	ENSMUSG00000120852
0.0003235	0.1135	0.1542	1	0.4998	Gda
0.0003232	0.02837	0.0185	1	0.5	Gm11802
0.0003224	0.1419	0.185	1	0.4998	Gm42849
0.0003223	0.04256	0.05551	1	0.4999	Gm18030
0.0003222	0.04256	0.03701	1	0.5	Gm4739
0.0003219	0.08512	0.08018	1	0.5	Slco1b2
0.0003218	0.2695	0.4071	0.3431	0.4993	mt-Nd3
0.0003217	0.05675	0.05551	1	0.5	Gm10399
0.0003215	0.04256	0.0185	0.7498	0.5001	Exoc1l
0.000321	0.04256	0.02467	1	0.5001	Gm19590
0.0003206	0.04256	0.03084	1	0.5001	Snord13
0.0003204	0.05675	0.0185	0.3708	0.5002	Gm4657
0.0003198	0.02837	0.0185	1	0.5	Or14q1-ps1
0.0003197	0.1277	0.1357	1	0.5	Gm16348
0.0003195	0.1419	0.2159	0.6433	0.4996	Rasgrp2
0.0003191	0.02837	0.006168	0.4806	0.5001	Gm29325
0.000319	0.07093	0.07401	1	0.5	Gdf10
0.000319	0.02837	0.01234	0.9158	0.5001	Ccdc160
0.0003188	0.4114	0.6291	0.1453	0.4989	Ccr3
0.0003183	0.04256	0.04934	1	0.5	Disp2
0.0003178	0.07093	0.08018	1	0.5	Gm4798
0.0003176	0.02837	0.006168	0.4806	0.5001	Ccdc184
0.0003175	0.2695	0.3639	0.6636	0.4995	Rasip1
0.0003172	0.05675	0.03701	1	0.5001	Gm42752
0.0003168	10.4	15.67	1.503e-16	0.4789	Dynlrb1
0.0003161	0.08512	0.08635	1	0.5	Il17rb
0.0003159	0.02837	0.01234	0.9158	0.5001	Zfp987
0.0003159	0.01419	0	0.3793	0.5001	Gm14169
0.0003157	0.04256	0.04934	1	0.5	ENSMUSG00000121079
0.0003141	0.7093	1.11	0.01959	0.498	Tnfrsf22
0.0003137	0.04256	0.02467	1	0.5001	4930534D22Rik
0.0003137	0.04256	0.04934	1	0.5	Gm43917
0.0003136	0.02837	0	0.1098	0.5001	1110015O18Rik
0.0003136	0.02837	0.01234	0.9158	0.5001	Gm50328
0.0003135	0.1135	0.185	0.5834	0.4996	Fsip1
0.0003134	0.0993	0.1357	1	0.4998	Moap1
0.0003133	0.02837	0.006168	0.4806	0.5001	Gm14279
0.0003132	0.07093	0.04318	0.9158	0.5001	ENSMUSG00000119982
0.0003129	0.07093	0.09252	1	0.4999	Gm36693
0.0003126	0.02837	0.0185	1	0.5	Retnlg
0.0003125	0.02837	0.006168	0.4806	0.5001	Gm34091
0.0003125	0.02837	0	0.1098	0.5001	Gm6581
0.0003125	0.01419	0	0.3793	0.5001	Gm35110
0.0003123	0.04256	0.03701	1	0.5	Tecta
0.000312	0.02837	0	0.1098	0.5001	Slc1a7
0.000312	0.02837	0.01234	0.9158	0.5001	Gm42196
0.0003117	0.1135	0.1419	1	0.4999	Fpr3
0.0003108	0.01419	0	0.3793	0.5001	Rps24-ps2
0.0003102	2.795	4.385	2.645e-07	0.4925	Psme2b
0.0003102	0.01419	0	0.3793	0.5001	Gm12493
0.0003101	0.05675	0.05551	1	0.5	Dnajc5b
0.0003098	0.02837	0.0185	1	0.5	Rpl34-ps1
0.0003081	0.01419	0	0.3793	0.5001	Smt3h2-ps4
0.000308	0.07093	0.05551	1	0.5001	Wfdc8
0.0003077	0.02837	0	0.1098	0.5001	Gm34240
0.0003074	0.04256	0.02467	1	0.5001	Pcdhb7
0.0003072	0.01419	0	0.3793	0.5001	Gm46522
0.000307	0.04256	0.03084	1	0.5001	4930431F10Rik
0.0003069	0.02837	0.01234	0.9158	0.5001	Gm48956
0.0003068	0.07093	0.06168	1	0.5	Gm28156
0.0003066	0.3405	0.5304	0.1777	0.4991	A330015K06Rik
0.000306	0.04256	0.03084	1	0.5001	Gm28610
0.0003056	0.02837	0.006168	0.4806	0.5001	Gpr26
0.0003055	0.04256	0.006168	0.1707	0.5002	Gm6706
0.0003053	0.04256	0.03084	1	0.5001	Gm18760
0.0003052	0.04256	0.03084	1	0.5001	Platr28
0.000305	0.08512	0.08635	1	0.5	Rps3a2
0.0003049	0.04256	0.04318	1	0.5	Gm39929
0.0003048	0.04256	0.02467	1	0.5001	Gprin1
0.0003046	0.3263	0.5181	0.1601	0.499	ENSMUSG00000120883
0.0003042	0.04256	0.02467	1	0.5001	Hebp2
0.000304	0.02837	0.006168	0.4806	0.5001	Gm43028
0.000304	0.04256	0.03701	1	0.5	Gm8319
0.0003038	0.02837	0.03701	1	0.5	Gm43301
0.0003035	0.02837	0.01234	0.9158	0.5001	Oscar
0.0003033	0.4682	0.8265	0.0125	0.4982	Nrg2
0.0003031	0.01419	0	0.3793	0.5001	Gm30467
0.000303	0.05675	0.08018	1	0.4999	Gm20629
0.000303	0.02837	0.006168	0.4806	0.5001	Gm46379
0.0003029	0.02837	0	0.1098	0.5001	Gm36480
0.0003028	0.02837	0.03084	1	0.5	Gm45307
0.0003026	0.05675	0.06168	1	0.5	Gm9008
0.0003018	0.02837	0.0185	1	0.5	Gm44129
0.0003014	0.02837	0.01234	0.9158	0.5001	Gm11349
0.0003014	0.05675	0.05551	1	0.5	Gm5466
0.0003014	0.02837	0.006168	0.4806	0.5001	Gm8031
0.0003012	0.08512	0.111	1	0.4999	4732414G09Rik
0.0003007	0.1419	0.2097	0.7046	0.4997	Cish
0.0003006	0.07093	0.09252	1	0.4999	Gtse1
0.0003002	0.02837	0.0185	1	0.5	1700020L24Rik
0.0002997	0.04256	0.02467	1	0.5001	Zfp488
0.0002996	0.07093	0.06168	1	0.5	Scube2
0.0002996	0.07093	0.09252	1	0.4999	Uox
0.0002996	0.02837	0.03084	1	0.5	C230034O21Rik
0.0002993	0.02837	0.01234	0.9158	0.5001	Gm11228
0.0002991	0.08512	0.09252	1	0.5	Sap18b
0.0002988	0.04256	0.05551	1	0.4999	Gm9925
0.0002988	0.04256	0.03701	1	0.5	Tmem41b-ps
0.0002987	0.05675	0.04934	1	0.5	Prss46
0.0002986	0.1419	0.2097	0.7047	0.4997	Gm15327
0.0002981	0.04256	0.03084	1	0.5001	Gm34225
0.0002976	0.1702	0.2529	0.6098	0.4996	H60b
0.0002975	0.02837	0.0185	1	0.5	Gm36485
0.0002972	0.02837	0.01234	0.9158	0.5001	Vmn2r45
0.0002972	0.01419	0	0.3793	0.5001	Or13a24
0.0002966	0.01419	0	0.3793	0.5001	Gm8330
0.000296	0.02837	0.006168	0.4806	0.5001	2610028E06Rik
0.000296	0.01419	0	0.3793	0.5001	Gm10043
0.0002959	0.05675	0.04318	1	0.5001	Gm12043
0.0002959	0.2412	0.3392	0.5901	0.4995	Gm49010
0.0002958	0.02837	0.006168	0.4806	0.5001	4921511C20Rik
0.0002958	0.05675	0.04318	1	0.5001	Mdfic2
0.0002956	0.02837	0	0.1098	0.5001	Gm13880
0.000295	0.0993	0.148	0.8389	0.4998	9530059O14Rik
0.0002948	0.08512	0.111	1	0.4999	St8sia5
0.0002947	0.02837	0.01234	0.9158	0.5001	Gabra6
0.0002946	0.05675	0.03701	1	0.5001	Itk
0.0002946	0.04256	0.03084	1	0.5001	Fxyd7
0.0002946	0.02837	0.01234	0.9158	0.5001	Gm13393
0.0002945	0.05675	0.04934	1	0.5	Pou2af3
0.0002944	0.04256	0.0185	0.7498	0.5001	A330058E17Rik
0.0002941	0.02837	0.006168	0.4806	0.5001	Vmn2r-ps56
0.000294	0.02837	0.006168	0.4806	0.5001	Gm40988
0.0002939	0.04256	0.02467	1	0.5001	Ucp1
0.0002937	0.1135	0.1419	1	0.4999	Ptprn
0.0002936	0.08512	0.09869	1	0.4999	Pgam2
0.0002932	0.3121	0.4132	0.6605	0.4995	S1pr4
0.0002932	0.02837	0.006168	0.4806	0.5001	Gm9118
0.0002931	3.22	5.07	2.321e-08	0.4913	Mrps21
0.0002928	0.2695	0.3701	0.6168	0.4995	Gm8817
0.0002928	0.01419	0	0.3793	0.5001	Gm10636
0.0002927	0.05675	0.06785	1	0.4999	Gm38309
0.0002923	0.02837	0.01234	0.9158	0.5001	Meiob
0.0002923	0.02837	0	0.1098	0.5001	Gm10284
0.0002923	0.04256	0.03084	1	0.5001	Gm4928
0.0002923	0.02837	0	0.1098	0.5001	Gm50398
0.0002919	0.1419	0.1665	1	0.4999	Gm37509
0.0002917	0.02837	0	0.1098	0.5001	Gm18864
0.0002915	0.1561	0.2097	0.9226	0.4997	Gm4864
0.0002914	0.02837	0.006168	0.4806	0.5001	Gm7860
0.0002913	0.07093	0.08018	1	0.5	Gm12944
0.0002906	0.04256	0.006168	0.1706	0.5002	Gm12034
0.0002905	0.07093	0.06785	1	0.5	Gabrr3
0.0002904	0.02837	0.006168	0.4806	0.5001	Pttg1ip2
0.0002902	0.08512	0.1357	0.7819	0.4997	Gm47196
0.0002897	0.01419	0	0.3793	0.5001	Gm37016
0.0002895	0.02837	0	0.1098	0.5001	Gm45756
0.0002892	0.02837	0.02467	1	0.5	Mindy4b-ps
0.0002891	0.1419	0.1974	0.8558	0.4997	Prss23
0.0002891	0.02837	0	0.1098	0.5001	Rpl19-ps9
0.0002888	0.01419	0	0.3793	0.5001	Gm9234
0.0002879	0.1702	0.2344	0.8389	0.4997	Rps26-ps1
0.0002879	0.02837	0.01234	0.9158	0.5001	Gm13578
0.0002878	0.04256	0.0185	0.7498	0.5001	Gm54720
0.0002869	0.2128	0.3146	0.5118	0.4995	Gm45743
0.0002868	0.05675	0.05551	1	0.5	Gm38137
0.0002865	0.02837	0.01234	0.9158	0.5001	Oprd1
0.0002865	0.02837	0.01234	0.9158	0.5001	Gm16325
0.000286	0.02837	0.01234	0.9158	0.5001	Gm12988
0.0002858	0.05675	0.06168	1	0.5	Grip2
0.0002856	0.4256	0.5921	0.352	0.4992	Ntn4
0.0002856	0.05675	0.05551	1	0.5	Tafa4
0.0002855	0.02837	0.006168	0.4806	0.5001	mt-Atp6
0.0002846	0.05675	0.04318	1	0.5001	AK157302
0.0002844	0.1135	0.111	1	0.5	Gm10073
0.0002843	0.02837	0	0.1098	0.5001	Inmt
0.0002841	0.02837	0.0185	1	0.5	Nme8
0.0002836	0.07093	0.04934	1	0.5001	7530416G11Rik
0.0002831	0.04256	0.04318	1	0.5	Cnnm1
0.0002829	0.02837	0	0.1098	0.5001	AW551984
0.0002825	0.01419	0	0.3793	0.5001	Dsg1b
0.0002825	0.1135	0.1542	1	0.4998	2610017A05Rik
0.0002823	0.02837	0	0.1098	0.5001	Gm45494
0.0002823	0.01419	0	0.3793	0.5001	ENSMUSG00000120085
0.000282	0.02837	0.02467	1	0.5	Gm17402
0.0002819	0.02837	0.0185	1	0.5	Ccn4
0.0002818	0.02837	0.0185	1	0.5	Ccdc183
0.0002813	0.1419	0.1604	1	0.4999	Gm7308
0.0002811	1.206	1.918	0.000701	0.4965	Ube2d-ps - ENSMUSG00000121496
0.000281	0.02837	0.03084	1	0.5	Gm7729
0.000281	0.02837	0.01234	0.9158	0.5001	4933422A05Rik
0.0002806	0.04256	0.03701	1	0.5	ENSMUSG00000120072
0.0002804	2.681	4.021	9.01e-06	0.4937	Thap11
0.0002802	0.08512	0.08018	1	0.5	G0s2
0.0002801	0.02837	0.02467	1	0.5	4930590L20Rik
0.00028	0.01419	0	0.3793	0.5001	Gm21009
0.0002797	0.05675	0.03084	0.8452	0.5001	Hao1
0.0002797	0.02837	0.006168	0.4806	0.5001	C130021I20Rik
0.0002797	0.02837	0.006168	0.4806	0.5001	Gm12416
0.0002797	0.07093	0.09252	1	0.4999	Gm50050
0.0002796	0.2979	0.4688	0.2093	0.4992	Slc14a2
0.0002793	0.01419	0	0.3793	0.5001	Gdf6
0.0002793	0.01419	0	0.3793	0.5001	Gm18432
0.0002792	0.02837	0.01234	0.9158	0.5001	Gm8784
0.0002787	0.04256	0.05551	1	0.4999	Wdr95
0.0002786	0.07093	0.05551	1	0.5001	Gm7407
0.000278	0.07093	0.1049	1	0.4998	Fam131b
0.0002772	0.2412	0.3639	0.3897	0.4994	Gm13456
0.000277	0.02837	0	0.1098	0.5001	Vmn2r-ps89
0.0002769	0.227	0.3454	0.4005	0.4994	Gm21691
0.0002766	0.05675	0.04318	1	0.5001	Gm11209
0.0002766	0.02837	0.006168	0.4806	0.5001	Gm34664
0.0002763	0.02837	0.01234	0.9158	0.5001	1700007F19Rik
0.000276	0.01419	0	0.3793	0.5001	Gm15589
0.0002759	0.01419	0.01234	1	0.5	Gm11517
0.0002759	0.05675	0.06785	1	0.4999	Gm42507
0.0002758	0.02837	0.02467	1	0.5	Gm45079
0.0002755	0.02837	0.01234	0.9158	0.5001	1700061N14Rik
0.000275	0.07093	0.06168	1	0.5	Vmn2r-ps25
0.000275	0.01419	0	0.3793	0.5001	Gm48281
0.0002749	0.02837	0.0185	1	0.5	Gm56109
0.0002738	0.04256	0.0185	0.7498	0.5001	Gm16585
0.0002738	0.02837	0.0185	1	0.5	Zim3
0.0002734	0.3547	0.4873	0.4736	0.4993	4732487G21Rik
0.0002733	0.1277	0.1727	1	0.4998	H3c13
0.0002731	0.01419	0	0.3793	0.5001	Dact2
0.0002729	0.04256	0.03084	1	0.5001	Loxl2
0.0002726	0.02837	0.01234	0.9158	0.5001	Gm36742
0.0002725	0.05675	0.06168	1	0.5	Lrrc17
0.0002725	0.04256	0.02467	1	0.5001	Tmem262
0.0002725	0.04256	0.04318	1	0.5	Gm13230
0.0002725	0.01419	0.006168	1	0.5	Prdx2-ps1
0.0002724	0.3547	0.623	0.04013	0.4987	Mmp19
0.0002724	0.3972	0.6168	0.132	0.4989	Myh11
0.0002722	0.1419	0.1912	0.9615	0.4998	Gm38192
0.0002721	0.02837	0.01234	0.9158	0.5001	Gm7691
0.0002719	0.01419	0.006168	1	0.5	Rgs18
0.0002717	0.01419	0	0.3793	0.5001	4930434B07Rik
0.0002717	0.01419	0	0.3793	0.5001	Gm10440
0.0002716	0.02837	0.006168	0.4806	0.5001	ENSMUSG00000121081
0.0002714	0.01419	0.006168	1	0.5	n-R5s115
0.0002712	0.02837	0.0185	1	0.5	Gm5763
0.0002712	0.04256	0.04934	1	0.5	Gm48622
0.000271	0.02837	0.01234	0.9158	0.5001	Gm18304
0.0002708	0.02837	0.03084	1	0.5	Camp
0.0002707	1.532	2.362	0.0003661	0.496	Fdps
0.0002707	0.04256	0.04318	1	0.5	Nr1i2
0.0002704	0.07093	0.06785	1	0.5	Crb2
0.0002704	0.02837	0.006168	0.4806	0.5001	4930568E12Rik
0.0002697	0.08512	0.06168	1	0.5001	Gm15772
0.0002696	0.04256	0.03701	1	0.5	Fam83d
0.0002695	0.9505	1.573	0.001066	0.4969	Mcrip2
0.0002694	0.01419	0.006168	1	0.5	Cited4
0.0002694	0.01419	0.006168	1	0.5	Gm49076
0.0002691	0.04256	0.03701	1	0.5	Iqcj
0.000269	0.1702	0.1974	1	0.4999	Gm6863
0.000269	0.01419	0	0.3793	0.5001	ENSMUSG00000119972
0.0002688	0.02837	0	0.1098	0.5001	Nlrp9b
0.0002686	0.01419	0	0.3793	0.5001	Dmrtc2
0.0002682	0.02837	0.006168	0.4806	0.5001	Gm42980
0.0002681	0.02837	0.006168	0.4806	0.5001	Gm2098
0.000268	0.01419	0	0.3793	0.5001	ENSMUSG00000121113
0.0002677	0.02837	0	0.1098	0.5001	Gm23058
0.0002675	0.07093	0.1172	0.7955	0.4998	Cfap161
0.0002668	0.2695	0.3639	0.6621	0.4995	Ccn1
0.0002666	0.02837	0.03084	1	0.5	Pi15
0.0002665	0.04256	0.02467	1	0.5001	Gm7995
0.0002662	0.08512	0.111	1	0.4999	Zfp986
0.0002662	0.05675	0.04318	1	0.5001	Gm17802
0.0002661	0.04256	0.04318	1	0.5	Gm37069
0.0002661	0.01419	0	0.3793	0.5001	Gm54831
0.000266	0.01419	0	0.3793	0.5001	Or5l14
0.0002658	0.05675	0.04318	1	0.5001	Klf5
0.0002655	0.0993	0.148	0.8389	0.4998	St8sia2
0.0002654	0.05675	0.08635	1	0.4999	Gm48371
0.0002651	0.1277	0.148	1	0.4999	Glns-ps1
0.0002645	0.02837	0.0185	1	0.5	Gm9959
0.0002645	0.01419	0	0.3793	0.5001	Gm6559
0.0002644	0.0993	0.111	1	0.4999	Carmil2
0.0002641	0.02837	0.02467	1	0.5	Gm13925
0.0002638	0.04256	0.04318	1	0.5	B4galnt3
0.0002633	0.07093	0.06785	1	0.5	Lncbate1
0.000263	0.1844	0.2529	0.8128	0.4997	Pde6g
0.0002627	1.575	2.498	9.189e-05	0.4955	2310040G24Rik
0.0002626	0.08512	0.1049	1	0.4999	Hhla1
0.0002626	0.01419	0	0.3793	0.5001	1700092C10Rik
0.0002625	0.04256	0.03084	1	0.5001	Slc28a2
0.0002623	0.02837	0.01234	0.9158	0.5001	Gm44645
0.000262	0.08512	0.111	1	0.4999	Vmn2r-ps54 - ENSMUSG00000121286
0.0002619	0.02837	0.006168	0.4806	0.5001	Gm15679
0.0002618	0.5249	0.7895	0.09944	0.4987	Gm26512
0.0002615	0.01419	0	0.3793	0.5001	Gm35986
0.0002612	0.5533	0.7525	0.3009	0.499	Ly6k
0.0002609	0.01419	0	0.3793	0.5001	ENSMUSG00000121565
0.0002606	0.05675	0.04934	1	0.5	Fndc9
0.0002606	0.02837	0.006168	0.4806	0.5001	Gm5776
0.0002605	0.3688	0.5181	0.3832	0.4993	Cfap53
0.0002603	0.01419	0	0.3793	0.5001	Lcn12
0.0002603	0.02837	0.0185	1	0.5	Gm37932
0.0002603	0.04256	0.04318	1	0.5	Dpep2 - ENSMUSG00000115067
0.0002598	0.02837	0.0185	1	0.5	Sec14l4
0.0002597	0.01419	0	0.3793	0.5001	Gpr174
0.0002593	0.01419	0	0.3793	0.5001	Gm22387
0.0002588	0.01419	0	0.3793	0.5001	Gm45674
0.0002586	0.1277	0.1727	1	0.4998	Pglyrp3
0.0002584	0.04256	0.02467	1	0.5001	Gm50011
0.0002583	0.01419	0.006168	1	0.5	Nxf3
0.0002582	0.07093	0.06785	1	0.5	Cabp1
0.0002579	0.01419	0	0.3793	0.5001	Isl1
0.0002579	0.07093	0.08018	1	0.5	Gm15663
0.0002578	0.04256	0.02467	1	0.5001	Fezf2
0.0002578	0.01419	0	0.3793	0.5001	Gm5883
0.0002578	0.04256	0.02467	1	0.5001	Gm45588
0.0002576	0.08512	0.09869	1	0.4999	Asmt
0.0002574	0.02837	0.0185	1	0.5	Gm8577
0.000257	0.5816	0.771	0.3641	0.4991	Qprt
0.0002569	0.07093	0.05551	1	0.5001	Ccr10
0.0002566	0.05675	0.09252	0.899	0.4998	Scx
0.0002565	0.01419	0	0.3793	0.5001	Gm12081
0.0002564	0.07093	0.08018	1	0.5	Gm23629
0.0002563	0.01419	0	0.3793	0.5001	Gm14015
0.0002563	0.04256	0.03084	1	0.5001	Gm29242
0.0002563	0.04256	0.03084	1	0.5001	Gm19178
0.0002559	0.04256	0.03084	1	0.5001	Mug2
0.0002554	0.01419	0	0.3793	0.5001	Hba-ps4
0.000255	0.02837	0.006168	0.4806	0.5001	Apol7e
0.0002546	0.02837	0.0185	1	0.5	Kctd19
0.0002544	0.02837	0.03084	1	0.5	Wnt3
0.0002543	0.04256	0.04318	1	0.5	Mcf2
0.0002543	0.07093	0.07401	1	0.5	Sox18
0.0002539	0.04256	0.04318	1	0.5	9330121J05Rik
0.0002538	0.04256	0.03701	1	0.5	Gprc5d
0.0002537	0.1561	0.1789	1	0.4999	Igfbp6
0.0002536	0.1419	0.1974	0.8562	0.4997	4930509G22Rik
0.0002535	1.007	1.523	0.009	0.4975	Ybey
0.0002533	0.01419	0	0.3793	0.5001	Gm9115
0.0002532	0.02837	0.01234	0.9158	0.5001	1700085C21Rik
0.0002528	0.0993	0.1234	1	0.4999	Vdac3-ps1
0.0002526	0.08512	0.1049	1	0.4999	Gm12696
0.0002524	0.02837	0.0185	1	0.5	5031434C07Rik
0.0002524	0.02837	0.03084	1	0.5	Drr1
0.0002524	0.05675	0.07401	1	0.4999	Gm48657
0.0002521	0.07093	0.07401	1	0.5	Pira2
0.000252	0.08512	0.1172	1	0.4998	Adcy1
0.0002519	0.02837	0.01234	0.9158	0.5001	Gm47073
0.0002518	0.05675	0.06168	1	0.5	Gm13066
0.0002517	0.1135	0.1295	1	0.4999	Gm42502
0.0002516	0.02837	0.006168	0.4806	0.5001	Gm11539
0.0002515	0.04256	0.02467	1	0.5001	Bend4
0.0002513	0.05675	0.05551	1	0.5	Gm6789
0.0002512	0.02837	0.01234	0.9158	0.5001	Gm13196
0.0002511	0.04256	0.0185	0.7498	0.5001	Gm9755
0.0002511	0.1277	0.1912	0.7262	0.4997	Gm42884
0.0002508	0.01419	0	0.3793	0.5001	A730032A03Rik
0.0002501	0.04256	0.04318	1	0.5	Sspnos
0.00025	0.01419	0	0.3793	0.5001	Gm43120
0.0002492	0.02837	0.0185	1	0.5	Gm6807
0.0002492	0.04256	0.03701	1	0.5	Gm16105
0.0002489	0.01419	0	0.3793	0.5001	Gm9390
0.0002487	0.07093	0.06785	1	0.5	Emid1
0.0002486	0.5107	0.7833	0.08231	0.4987	Zfp507
0.0002484	0.02837	0.01234	0.9158	0.5001	Dlx6
0.0002484	0.04256	0.05551	1	0.4999	Tmem145
0.0002484	0.2128	0.2776	0.8839	0.4997	A930006L05Rik
0.0002481	0.01419	0	0.3793	0.5001	Gm13464
0.0002479	0.04256	0.02467	1	0.5001	Gm16090
0.0002479	0.02837	0.006168	0.4806	0.5001	Gm15627
0.0002479	0.01419	0	0.3793	0.5001	Gm37381
0.0002476	0.01419	0.006168	1	0.5	A930014E01Rik
0.0002472	0.01419	0	0.3793	0.5001	Gm9480
0.0002471	0.05675	0.04934	1	0.5	Gm45887
0.0002469	0.0993	0.1295	1	0.4998	S1pr5
0.0002468	0.02837	0.006168	0.4806	0.5001	Gm45899
0.0002466	0.02837	0.0185	1	0.5	Exph5
0.0002465	0.02837	0.01234	0.9158	0.5001	Gm15628
0.0002456	0.01419	0	0.3793	0.5001	Gm4959
0.0002456	0.02837	0.03084	1	0.5	Gm45897
0.0002456	0.07093	0.08635	1	0.4999	Gm47257
0.0002455	0.04256	0.03084	1	0.5001	Gm13594
0.0002452	0.02837	0.04318	1	0.4999	Gm7816
0.000245	0.01419	0.01234	1	0.5	Gp6
0.000245	0.1561	0.1727	1	0.4999	1700030L22Rik
0.0002447	0.02837	0	0.1098	0.5001	Gm12854
0.0002445	0.01419	0	0.3793	0.5001	Cyp2a22
0.0002443	0.1135	0.1665	0.8389	0.4997	Ccdc81
0.0002441	0.01419	0	0.3793	0.5001	Pcdha6
0.000244	0.227	0.3639	0.2892	0.4993	Cfap47
0.000244	0.05675	0.05551	1	0.5	Gm37357
0.0002432	0.227	0.3331	0.4981	0.4995	Rpl21-ps6
0.0002429	0.01419	0	0.3793	0.5001	Or5ac17
0.0002429	0.0993	0.1295	1	0.4998	Gm42846
0.0002429	0.05675	0.05551	1	0.5	Gm39204
0.0002427	0.01419	0	0.3793	0.5001	Mrgpra2a
0.0002426	0.01419	0	0.3793	0.5001	Gm8054
0.0002423	0.01419	0.006168	1	0.5	Sult2a6
0.0002423	0.01419	0.006168	1	0.5	Vmn2r-ps69
0.0002421	0.05675	0.04934	1	0.5	Gm38251
0.0002421	0.01419	0	0.3793	0.5001	Gm37345
0.000242	0.02837	0.01234	0.9158	0.5001	Gabrr1
0.000242	0.02837	0.0185	1	0.5	Gm50347
0.0002418	0.2128	0.3701	0.1738	0.4992	ENSMUSG00000120121
0.0002413	0.02837	0.0185	1	0.5	Gm49857
0.0002412	0.01419	0	0.3793	0.5001	Gm44893
0.0002411	0.05675	0.09252	0.899	0.4998	Elfn2
0.0002411	0.0993	0.1049	1	0.5	H2bc11
0.0002411	0.02837	0.0185	1	0.5	Gm13171
0.0002411	0.01419	0	0.3793	0.5001	Gm29100
0.000241	0.02837	0.01234	0.9158	0.5001	Sim2
0.0002404	0.08512	0.111	1	0.4999	Vsig2
0.0002404	0.05675	0.07401	1	0.4999	Gm11468
0.0002404	0.01419	0	0.3793	0.5001	Gm19018
0.0002403	0.02837	0.02467	1	0.5	Gm12823
0.0002402	0.02837	0.0185	1	0.5	Rd3
0.0002402	0.02837	0.01234	0.9158	0.5001	Rpl19-ps1
0.0002401	0.02837	0.01234	0.9158	0.5001	Gm46658
0.00024	0.01419	0.006168	1	0.5	Mir24-2
0.0002398	0.05675	0.06785	1	0.4999	Gm16141
0.0002395	0.02837	0.01234	0.9158	0.5001	Gm47715
0.0002394	0.07093	0.08635	1	0.4999	Cox4i2
0.0002393	0.02837	0.006168	0.4806	0.5001	Or7e178
0.0002391	0.01419	0	0.3793	0.5001	ENSMUSG00000118624
0.000239	0.04256	0.06168	1	0.4999	Rag2
0.0002389	0.1135	0.1542	1	0.4998	Gm43016
0.0002389	0.01419	0	0.3793	0.5001	Gm49746
0.0002388	0.02837	0.02467	1	0.5	Mbnl3
0.0002387	0.01419	0	0.3793	0.5001	Gm55482
0.0002386	0.01419	0	0.3793	0.5001	Pramel5
0.0002386	0.02837	0.01234	0.9158	0.5001	Tdrd6
0.0002381	0.05675	0.05551	1	0.5	Pheta2
0.0002381	0.02837	0.0185	1	0.5	Gm48893
0.0002379	0.04256	0.04318	1	0.5	9630041A04Rik
0.0002379	0.02837	0.02467	1	0.5	Gm50189
0.0002377	0.2979	0.4379	0.3664	0.4993	Osmr
0.0002377	0.01419	0.006168	1	0.5	Ptx4
0.0002377	0.01419	0.006168	1	0.5	Gm10118
0.0002374	0.08512	0.09869	1	0.4999	Gm20757
0.0002373	0.01419	0	0.3793	0.5001	Hoxd8
0.0002373	0.02837	0.01234	0.9158	0.5001	Gm6292
0.0002373	0.0993	0.1357	1	0.4998	Gm48071
0.0002372	0.02837	0.01234	0.9158	0.5001	Gm25683
0.0002369	0.2412	0.3392	0.5898	0.4995	Gm49201
0.0002367	0.01419	0	0.3793	0.5001	Apol11a
0.000236	0.02837	0.02467	1	0.5	Vtcn1
0.0002359	0.02837	0.03701	1	0.5	Esco2
0.0002359	0.02837	0	0.1098	0.5001	Gm6615
0.0002357	0.02837	0.02467	1	0.5	Gm41293
0.0002353	0.02837	0.03701	1	0.5	Gm45323
0.0002351	0.01419	0.01234	1	0.5	5330439B14Rik
0.0002348	0.02837	0.006168	0.4806	0.5001	Pgam1-ps1
0.0002346	0.1561	0.2652	0.3444	0.4995	Dnah8
0.0002346	0.02837	0.01234	0.9158	0.5001	Gm48982
0.0002344	0.05675	0.06168	1	0.5	1700024G13Rik
0.0002344	0.01419	0.01234	1	0.5	Gm12023
0.0002343	0.1135	0.1604	0.9158	0.4998	Tacr3
0.0002342	0.02837	0.01234	0.9158	0.5001	Gm20557
0.0002338	0.04256	0.03701	1	0.5	Gm4668
0.0002337	0.07093	0.07401	1	0.5	9630015K15Rik
0.0002335	0.01419	0	0.3793	0.5001	ENSMUSG00000120778
0.0002331	0.01419	0	0.3793	0.5001	Gm34215
0.0002329	0.01419	0	0.3793	0.5001	Vip
0.0002328	0.01419	0.01234	1	0.5	Crygs
0.0002328	0.08512	0.111	1	0.4999	Hdx
0.0002328	0.08512	0.1234	0.9892	0.4998	Lrrc32
0.0002322	0.01419	0	0.3793	0.5001	Barhl2
0.0002322	0.04256	0.03084	1	0.5001	Gm37184
0.0002322	0.1135	0.1604	0.9158	0.4998	Gm37787
0.0002313	0.02837	0.03701	1	0.5	Ube2c
0.0002312	0.04256	0.02467	1	0.5001	Gm14486
0.0002311	0.02837	0.0185	1	0.5	Gm4814
0.000231	0.1561	0.2035	1	0.4998	Rp1
0.0002307	0.02837	0	0.1098	0.5001	Smim31
0.0002306	0.01419	0	0.3793	0.5001	Gm35842
0.0002304	0.04256	0.0185	0.7498	0.5001	Lrrc37a
0.0002304	0.01419	0	0.3793	0.5001	D13Ertd608e
0.0002304	0.01419	0	0.3793	0.5001	Foxl2os
0.0002304	0.01419	0.006168	1	0.5	Gm39653
0.0002303	0.07093	0.08018	1	0.5	Gm35638
0.0002302	0.04256	0.04318	1	0.5	Gm12693
0.0002302	0.02837	0	0.1098	0.5001	Gm4600
0.00023	0.02837	0.01234	0.9158	0.5001	Gm48498
[truncated: 55,011 more rows]

## Sheet: DE-FRM
logFC	pct_1	pct_2	p_val_adj	auc	gene_names
0.5509	98	90.6	4.987e-296	0.6503	Csmd3
0.5252	98.34	90.04	0	0.661	Nav3
0.5142	94.96	77.42	0	0.6646	Fchsd2
0.477	93.29	72.2	0	0.66	Pan3
0.4727	99.97	96.86	0	0.7148	Tanc2
0.4713	98.88	89.59	0	0.6681	Rapgef5
0.464	98.93	89.49	0	0.6527	Mir99ahg
0.4436	91.1	76.88	9.143e-181	0.6171	Prkn
0.4422	99.26	90.79	0	0.6574	Snx29
0.4395	86.94	67.83	6.102e-212	0.626	Pard3b
0.4373	98.9	89.08	0	0.653	Numb
0.4289	99.96	97.42	0	0.6911	Srgap2
0.4272	80.82	65.7	8.698e-133	0.5993	Fhit
0.4236	81.31	57.57	5.176e-238	0.6319	Nos1ap
0.4172	99	90.34	0	0.6599	Dock10
0.4171	98.97	88.18	5.303e-287	0.648	Ankrd44
0.4165	100	98.01	0	0.7065	Elmo1
0.4121	96.63	84.73	6.648e-178	0.6164	Plxna4
0.4092	89.41	73.74	2.488e-175	0.6151	Ptprm
0.4048	99.31	91.64	0	0.6564	Dock8
0.4037	97.62	85.83	6.088e-275	0.6448	Dip2b
0.4016	95.55	78.92	4.854e-245	0.6365	Rptor
0.4015	92.55	76.87	1.388e-162	0.611	Klf12
0.3987	76.29	53.31	2.374e-206	0.6216	Bank1
0.3981	98.62	89.66	1.753e-207	0.6258	Inpp4b
0.3972	96.71	83.42	2.291e-183	0.6182	Large1
0.3961	89.01	72.95	3.334e-151	0.6068	Slc24a3
0.3959	87.05	66.11	2.431e-219	0.6281	Itga9
0.3954	100	98.62	0	0.6728	Plxdc2
0.3937	99.05	91.08	4.73e-276	0.6451	Ikzf1
0.3929	98.47	87.41	1.045e-239	0.6352	Celf2
0.3926	99.72	94.38	3.247e-301	0.6516	Pde3b
0.392	98.99	89.5	6.274e-246	0.637	Ophn1
0.3907	89.05	67.1	1.899e-229	0.6312	Kansl1
0.3885	91.2	74.47	3.196e-170	0.6135	Prkca
0.3803	99.73	94.83	0	0.6633	Frmd4a
0.3799	97.48	83.85	7.405e-204	0.6246	Fgfr2
0.3774	97.71	84.77	1.629e-185	0.6189	Gnaq
0.3766	95.46	80.31	3.21e-177	0.6161	Dleu2
0.3733	99.34	90.83	2.967e-263	0.6417	Chd9
0.3722	97.61	86.6	1.832e-165	0.6123	Chn2
0.3719	91.44	71.92	5.857e-213	0.6268	Clasp2
0.3719	96.86	84.29	2.215e-190	0.6204	Asap1
0.3708	91.13	71.37	2.733e-207	0.6251	Med13l
0.3695	96.57	81.37	8.382e-208	0.6258	Mycbp2
0.3693	86.04	68.82	1.84e-164	0.611	Bbs9
0.3692	98.15	87.02	1.967e-215	0.6282	Frmd4b
0.3684	95.88	84.23	1.575e-157	0.6095	Nfia
0.3679	97.66	87.12	1.165e-163	0.6117	Zbtb20
0.3665	90.63	72	4.965e-196	0.6217	Pld1
0.3654	89.15	68.51	7.317e-205	0.6241	Wdfy4
0.3629	96.98	83.7	4.355e-183	0.6181	Lrch1
0.3614	98.3	88.72	6.43e-190	0.6203	Plcl2
0.3606	93.14	76.53	3.683e-151	0.607	Btbd9
0.36	77.63	60.59	5.518e-120	0.5937	Hdac9
0.3592	93.81	78.81	1.926e-150	0.6068	Fbxl17
0.3592	91.44	77.82	1.827e-140	0.6032	Magi1
0.3584	99.59	92.69	6.598e-195	0.6219	Slc9a9
0.3557	80.28	64.58	5.038e-96	0.5842	Wwox
0.3555	94.78	80.01	8.161e-153	0.6077	Exoc4
0.3546	85.6	67.18	2.009e-148	0.6053	Zdhhc14
0.3541	85.03	68.64	1.954e-138	0.6018	Pid1
0.3526	75.23	52.08	4.819e-195	0.6179	ENSMUSG00000120385
0.3525	94.46	81.04	3.996e-145	0.605	Ttc28
0.3524	90.48	75.62	1.151e-134	0.6009	P3h2
0.3513	91.13	74.96	1.198e-161	0.6106	Gm10790
0.351	99.45	93.09	7.475e-248	0.6375	Pip4k2a
0.3509	88.91	68.73	9.98e-200	0.6225	Usp24
0.3505	96.85	84.71	4.55e-168	0.6131	Tbc1d5
0.3494	99.32	94.34	6.955e-159	0.6101	Plcl1
0.3489	99.99	96.46	2.705e-249	0.6379	Ldlrad4
0.3488	87.67	73.81	1.574e-108	0.5904	Cacnb2
0.3482	85.17	66.35	1.278e-148	0.6053	Zeb1
0.3473	90.02	72.23	1.904e-147	0.6054	Foxp1
0.3469	92.59	75.69	9.216e-175	0.6151	Tmem135
0.3469	86.87	68.24	7.782e-151	0.6063	Cables1
0.3461	99.65	94.12	2.269e-252	0.6388	Dock2
0.3461	99.91	97.14	5.098e-231	0.6328	Slc8a1
0.3454	92.87	76.04	2.081e-165	0.612	Trio
0.3442	82.8	60.32	1.201e-195	0.6201	Map3k5
0.3441	90.36	73.02	1.335e-134	0.6007	Pitpnc1
0.3439	95.24	82.74	7.521e-158	0.6096	0610040J01Rik
0.3434	87.23	65.19	2.071e-186	0.618	Uvrag
0.3434	87.06	66.67	1.195e-166	0.6117	Baz2b
0.3429	85.53	68.36	5.66e-131	0.599	Arl15
0.3428	94.17	77.24	7.647e-174	0.6149	Map4k4
0.3422	99.84	96.33	0	0.654	Qki
0.3415	90.72	72.06	7.058e-171	0.6136	Nf1
0.3407	93.18	76.75	1.113e-150	0.6069	Camk2d
0.3403	96.06	82.13	5.179e-164	0.6117	Tns3
0.3402	99.96	97.45	0	0.6535	Dock4
0.3399	75.74	58.93	1.437e-130	0.5974	Prkce
0.3398	94.98	82.08	3.138e-124	0.5971	4933406I18Rik
0.3397	83.77	61.08	5.73e-195	0.62	Wdfy2
0.3387	99.74	95.15	2.112e-247	0.6374	Ssh2
0.3385	88.52	68.07	2.164e-172	0.6137	Stag1
0.3365	99.86	95.9	1.157e-190	0.6206	Maml3
0.3365	97.65	87.87	1.898e-142	0.6041	Diaph2
0.336	99.88	96.84	0	0.6575	Inpp5d
0.3359	94.02	77.36	3.943e-139	0.6027	Zfand3
0.3332	96.57	84.17	3.01e-146	0.6055	Ppp3ca
0.3322	89.63	70.72	3.346e-154	0.6077	Phf14
0.3313	95.97	82.9	2.64e-160	0.6104	Itpr2
0.33	92.37	77.49	2.321e-118	0.5946	Hivep3
0.3297	88.7	69.86	1.483e-137	0.6016	Zcchc7
0.3296	89.63	76.57	2.914e-119	0.5949	Agmo
0.3289	93.08	77.33	6.779e-137	0.6018	Specc1
0.3288	75.21	54.76	5.353e-155	0.6055	Fkbp5
0.3286	91.02	71.92	1.744e-156	0.6086	Mvb12b
0.3285	98.53	90.44	2.922e-163	0.6116	Rreb1
0.3275	98.92	89.2	1.231e-142	0.6042	Gm2629
0.3273	92.83	76.16	2.639e-139	0.6027	Arid1b
0.3265	95.66	83.39	6.672e-125	0.5974	Zswim6
0.3257	85.88	65.6	2.059e-154	0.6073	Dennd1a
0.3247	91.53	73.95	1.339e-147	0.6056	Tbc1d22a
0.3246	96.08	82.78	5.066e-127	0.5982	Tbxas1
0.3245	93.05	77.63	2.713e-118	0.5946	Ppp1r9a
0.3244	99.97	96.65	3.21e-258	0.6404	Pag1
0.3241	78.88	59.65	6.229e-134	0.5989	Atxn1
0.3227	93.68	77.13	2.764e-151	0.6071	Acap2
0.3224	98.28	89.68	5.175e-153	0.608	Fli1
0.3221	79.15	57.19	1.049e-178	0.6141	Lrba
0.3221	98.51	89.19	1.626e-109	0.5912	Gab2
0.321	85.45	64.1	3.84e-157	0.6081	Ankrd17
0.3209	91.95	77.15	2.55e-137	0.602	Marchf1
0.3208	85.31	64.27	2.536e-164	0.6106	Vav2
0.3207	84.31	62.96	1.437e-160	0.6091	Tcf12
0.3207	88.24	74.2	2.153e-93	0.5838	Smyd3
0.3202	99.74	95.49	6.663e-210	0.6266	Mbnl1
0.3194	75.17	51.33	5.812e-195	0.6177	Ralgps1
0.3179	93.28	76.67	1.859e-151	0.6071	Wdfy3
0.3177	77.23	53.62	3.061e-187	0.616	Rnf169
0.3176	76.11	55.54	3.657e-152	0.6047	2610203C22Rik
0.3174	92.66	75.46	2.959e-137	0.6019	Nek7
0.3172	99.99	98.49	0	0.6568	Tgfbr1
0.3172	85.1	64.08	4.615e-165	0.6108	Sh3pxd2a
0.3172	94.97	79.35	1.318e-117	0.5944	Cux1
0.317	96.29	82.48	1.915e-125	0.5976	Dennd4a
0.3167	85.87	67.01	9.969e-135	0.6003	Parp8
0.3163	82.62	60.11	1.292e-171	0.6124	Cnot2
0.3163	93.35	78.67	1.202e-138	0.6025	Mgat5
0.3163	82.91	63.43	1.655e-136	0.6005	Peli2
0.3159	94.94	79.56	7.719e-147	0.6056	Adap2
0.3155	83.16	62.92	9.214e-138	0.601	Rtn4rl1
0.3152	81.96	61.72	1.853e-152	0.6061	Phc2
0.3151	83.91	61.47	3.072e-179	0.6151	Mapk14
0.3148	83.12	60.74	9.061e-178	0.6145	Usp34
0.3143	95.71	81.99	2.919e-138	0.6025	Rere
0.3142	99.54	93.94	2.245e-181	0.6176	Foxn3
0.3135	82.19	61.68	1.282e-146	0.604	Exoc6b
0.3134	74.82	51.4	1.459e-190	0.6163	Sik2
0.3133	96.34	86.93	1.849e-95	0.5851	Maml2
0.3131	97.01	85.75	2.82e-153	0.608	Rap1gds1
0.3127	97.99	90.25	1.568e-122	0.5965	Ubash3b
0.3124	89.32	69.82	1.436e-148	0.6057	Eif4g3
0.3114	82.2	58.88	2.266e-184	0.6163	Gtf2h2
0.3104	85.77	65.16	1.415e-159	0.6091	Fcho2
0.3092	92.77	77.49	1.238e-126	0.5979	Sh3kbp1
0.309	90.79	74.73	1.735e-130	0.5993	Itga6
0.3085	95.75	82.82	7.311e-138	0.6024	Mgat4a
0.3084	91.24	73.17	3.048e-140	0.6029	Tnrc6b
0.308	82.97	60.66	1.465e-160	0.6088	Anks1
0.3079	97.55	87.67	2.774e-135	0.6015	Zfp710
0.3078	91.3	75.75	1.259e-98	0.5862	Mitf
0.3076	93.86	79.19	1.481e-131	0.5999	Nrip1
0.3074	77.94	54.71	4.427e-172	0.6114	Vrk2
0.3073	76.85	55.78	2.207e-151	0.6045	Tcf7l2
0.3072	87.21	67.06	4.183e-137	0.6012	Lrrk1
0.307	85.04	65.21	1.124e-141	0.6027	Ncoa2
0.3054	82.14	64.64	3.53e-102	0.5869	Apba1
0.3053	94.56	82.7	1.84e-108	0.5907	Arhgap22
0.3052	72.25	50.95	1.169e-153	0.6041	Gab1
0.3047	99.8	96.15	1.374e-200	0.6237	Mertk
0.304	57.05	33.64	6.282e-220	0.6156	Myo18b
0.3033	91.21	73.42	4.035e-122	0.596	Arhgap39
0.303	70.7	46.03	1.307e-209	0.6201	Map4k3
0.3028	83.58	65.65	2.013e-114	0.5922	Vti1a
0.3026	84.26	67.92	1.041e-106	0.5892	Bach2
0.3023	89.55	71.95	3.178e-138	0.602	Lcp2
0.3023	93.05	78.53	5.957e-120	0.5953	Tcf4
0.3022	99.39	93.23	1.492e-182	0.618	Cyrib
0.3018	78.61	56.64	4.97e-151	0.6047	Sipa1l1
0.3017	86.83	71.08	4.214e-103	0.5879	Rtn1
0.3016	87.53	68.53	6.619e-136	0.6009	Sbf2
0.3015	99.96	97.77	5.102e-154	0.6084	Nav2
0.3011	93.32	80.51	6.792e-78	0.5767	Cadm1
0.3009	95.92	82.91	2.07e-126	0.598	Atp8a1
0.3007	80.89	58.9	9.456e-167	0.6105	Agps
0.3006	82.41	62.99	1.601e-120	0.5943	Gtdc1
0.3001	46.26	33.94	7.698e-76	0.5661	Xist
0.2997	75.61	56.56	3.648e-123	0.5943	Ssbp2
0.2982	80.61	58.79	6.541e-166	0.6102	Mkln1
0.2979	84.38	65.62	1.786e-110	0.5906	Cdh23
0.2975	99.09	92.41	9.531e-152	0.6075	Apbb1ip
0.2973	83.8	65.42	1.452e-115	0.5926	8030442B05Rik
0.2965	80.39	57.95	7.8e-161	0.6084	Mllt10
0.2965	83.1	61.38	2.354e-153	0.6064	Smg1
0.2963	83.48	62.63	3.369e-144	0.6033	Smarca2
0.2963	84.23	64.33	3.558e-126	0.5968	Msi2
0.296	94.42	79.98	3.211e-100	0.5871	Skap2
0.2956	78.86	57.58	1.247e-138	0.6004	Dock1
0.2933	97.12	86.24	1.865e-98	0.5864	Ppm1h
0.2931	96.69	86.75	6.254e-88	0.5816	Prkcb
0.2927	72.67	50.21	9.666e-170	0.6093	Phip
0.2922	77.97	56.36	6.204e-144	0.6021	Disc1
0.2917	76.58	53.46	5.277e-170	0.6104	Sppl3
0.2917	79.58	58.2	1.111e-151	0.6052	Vps13b
0.2917	59.8	51.17	6.59e-79	0.5734	Atp8a2
0.2913	81.04	59.27	3.329e-158	0.6077	Map3k3
0.2904	99.38	94.08	6.165e-146	0.6054	Mef2c
0.2901	88.44	71.31	1.871e-105	0.589	Man1c1
0.2887	78.24	55.9	8.067e-153	0.6052	Strn3
0.2884	83.37	66.07	4.666e-110	0.5904	Rnf180
0.288	85.35	65.67	1.63e-134	0.6001	Rapgef1
0.2877	80.03	59.13	2.18e-149	0.6045	Spire1
0.2874	74.67	51.98	3.423e-161	0.607	Sfmbt1
0.2873	80.53	60.24	3.384e-134	0.5992	St3gal5
0.2861	82.64	63.69	4.262e-132	0.5989	Snx13
0.2853	80.76	58.44	3.174e-149	0.6044	Pwwp2a
0.285	81.26	59.5	1.214e-145	0.6033	Setd5
0.2849	72.27	49.79	2.723e-163	0.6071	Fer
0.2847	84.75	67.3	3.329e-109	0.5902	Phf21a
0.2846	79.08	56.63	5.444e-148	0.6036	Ubn2
0.2845	90.93	74.36	1.196e-106	0.5897	Slc12a6
0.2843	83.8	63.55	7.878e-136	0.6003	Itsn2
0.2843	93.05	77.45	1.145e-100	0.5872	Chd7
0.2842	84.61	65.17	3.927e-123	0.5957	Arhgap17
0.2828	89.55	70.68	1.585e-112	0.5919	Luc7l2
0.2821	82.75	66.7	3.272e-93	0.5832	Oxr1
0.2818	85.5	65	6.517e-131	0.5987	Rnf216
0.2808	99.95	98.02	9.644e-271	0.6438	Zfhx3
0.2808	93.56	78.77	1.733e-106	0.5898	Plcg2
0.2805	77	58.65	1.767e-114	0.5912	Babam2
0.2802	83.07	63.99	3.864e-107	0.589	Fto
0.2797	99.96	96.94	7.912e-203	0.6244	Mef2a
0.2795	89.48	72.33	1.713e-112	0.592	Man1a2
0.2794	88.71	71.48	2.598e-102	0.5876	Blnk
0.2793	84.1	63.23	2.116e-134	0.5998	Ppp1r12a
0.2789	98.99	93.02	9.324e-143	0.6043	Slco2b1
0.2786	99.08	93.61	7.053e-106	0.5897	Zeb2
0.2785	77.67	54.61	5.216e-155	0.6057	Fam193a
0.278	97.74	87	7.317e-91	0.583	Etv6
0.278	88.01	72.46	4.525e-84	0.5794	Lhfpl2
0.2775	80.07	58.57	1.247e-139	0.601	Mtmr3
0.2765	76.5	58.02	8.462e-104	0.5867	Igf1r
0.2759	78.32	58.22	7.029e-129	0.5968	Pkig
0.2755	82.26	61.97	1.002e-128	0.5974	Dapp1
0.2754	89.86	72.41	5.059e-107	0.5897	Kmt2c
0.2752	98.22	90.81	3.616e-132	0.6003	Bmp2k
0.2748	71.9	50.91	3.013e-139	0.599	Mtss1
0.2748	80.7	60.48	1.149e-123	0.5952	Tet3
0.2747	87.57	68.91	4.564e-103	0.5878	Dnmt3a
0.2733	81.54	63.48	4.315e-112	0.591	Dock11
0.2731	82.64	61.66	1.981e-127	0.5969	Ap3b1
0.2727	97.17	87.31	4.183e-120	0.5956	Ivns1abp
0.2722	78.66	56.91	2.834e-135	0.5991	Rbm6
0.2722	97.39	87.58	5.191e-112	0.5923	Prex1
0.272	92.27	78.03	1.649e-111	0.5918	Herc2
0.2719	69.43	50.26	2.759e-111	0.5881	Dip2c
0.2719	87.76	73.98	4.523e-78	0.5765	Mctp1
0.2717	81.16	63.5	7.95e-87	0.5799	Cacna1d
0.2715	83.18	63.58	5.423e-116	0.5926	Col27a1
0.2713	98.62	90.53	1.336e-126	0.5981	Bin1
0.2706	75.84	53.15	3.875e-151	0.6039	Herc1
0.2705	99.16	93.79	4.137e-140	0.6033	Picalm
0.2703	85.15	67.25	3.595e-99	0.5859	Smad3
0.2702	68.87	51.06	4.543e-110	0.5877	Pde4d
0.2701	81.85	61.69	7.286e-118	0.5931	Eml4
0.2701	52.24	35.26	7.017e-119	0.5846	Sdk1
0.2697	81.01	60.76	1.004e-130	0.598	Ulk2
0.2692	69.84	46.54	2.596e-169	0.608	Smurf2
0.2692	77.67	55.15	2.455e-146	0.6027	Zfp638
0.2688	69.48	46.06	1.28e-165	0.6066	Thada
0.2688	74.9	52.03	2.533e-152	0.6041	Arih1
0.2684	71.62	49.02	4.62e-159	0.6054	Cds1
0.2682	77.08	56.77	3.332e-122	0.594	Mbd5
0.2675	77.9	58.22	1.073e-116	0.5921	Cdkal1
0.2673	86.95	72.3	1.997e-78	0.5766	Ank2
0.2672	76.39	56.81	1.792e-109	0.5889	Fars2
0.267	85.23	68.32	2.031e-101	0.587	Nuak1
0.2666	80.08	59.1	2.769e-125	0.5957	Dyrk1a
0.2665	74.04	51.26	5.245e-152	0.6037	Tubgcp5
0.2664	65.79	46.01	1.079e-130	0.5942	Supt3
0.266	69.53	49.8	1.662e-122	0.5924	Gm20498
0.2658	79.07	58.96	3.895e-124	0.5952	Pik3r5
0.2656	89.15	73.51	8.567e-83	0.5788	Fam172a
0.2649	74.33	52.36	1.412e-145	0.6017	Lcor
0.2639	71.89	50.6	2.274e-135	0.5975	St3gal3
0.2635	68.3	47.5	1.253e-144	0.5998	Phkb
0.2632	90.11	73.41	1.105e-94	0.5844	Rock2
0.2625	97.12	88.33	1.094e-101	0.5879	Arhgap5
0.2625	86.14	68.82	1.75e-100	0.5866	Rcsd1
0.2624	71.49	50.7	8.733e-132	0.5962	Smg6
0.2623	68.8	46.44	7.88e-158	0.6041	Wdr44
0.2621	74.14	52.66	9.962e-141	0.6	Rin3
0.2619	73.5	56.55	1.433e-92	0.5815	Phactr2
0.2616	84.49	64.71	1.85e-104	0.588	Dgkd
0.2608	97.57	86.2	8.62e-78	0.5767	Jmjd1c
0.2607	83.27	62.82	8.434e-111	0.5905	Ash1l
0.2607	91.83	75.59	4.53e-76	0.5756	Cmip
0.2604	80.14	59.37	2.835e-122	0.5945	Celf1
0.2598	84.39	64.85	2.797e-116	0.5929	Pten
0.2595	58.72	40.21	1.899e-133	0.5926	Nbea
0.259	89.03	75.43	5.318e-68	0.5714	Ccnd3
0.2589	92.86	77.55	6.571e-88	0.5814	Nipbl
0.2586	76.29	56.01	2.3e-120	0.5931	Myo9a
0.2578	89.18	72.31	1.188e-79	0.5772	Gna12
0.2577	94.97	81.36	3.022e-79	0.5774	Pik3ap1
0.2574	91.63	78.48	5.556e-82	0.5786	Rasgrp3
0.257	71.06	52.64	5.936e-107	0.5869	Cdk14
0.2567	85.63	66.65	2.506e-106	0.589	Nsd1
0.2567	92.79	78.13	2.234e-89	0.5821	Akap13
0.2566	81.84	61.61	3.622e-110	0.59	Ppp1r21
0.2566	67.05	48.19	1.003e-110	0.5872	Atg10
0.2566	99.7	95.92	6.059e-88	0.5817	Tmcc3
0.2565	73.32	51.08	4.263e-142	0.6002	Ambra1
0.2564	83.12	62.73	4.283e-107	0.5889	Atrx
0.2561	63.57	40.2	5.056e-185	0.61	Cop1
0.2553	77.32	58.15	9.479e-108	0.5884	E2f3
0.2553	92.75	76.73	1.042e-83	0.5794	Ankrd11
0.2548	89.78	76.51	3.609e-79	0.5772	Pmepa1
0.2544	73.33	51.2	4.147e-147	0.6019	Mark3
0.2536	89.07	74.11	1.383e-83	0.5792	Man1a
0.2534	98.49	92.1	2.449e-86	0.5809	Ptprj
0.252	60.58	40.13	5.964e-147	0.5974	Rps6ka5
0.2518	81.97	61.24	8.443e-110	0.5898	Birc6
0.2516	81.16	61.03	2.328e-114	0.5916	Washc4
0.2513	70.05	48.52	1.77e-133	0.5962	Mrtfa
0.2513	78.08	56.98	2.163e-123	0.5946	Zfp148
0.2513	87.73	69.9	3.723e-92	0.583	Crebbp
0.251	69.11	46.69	1.396e-154	0.6031	Psme4
0.2509	82.65	63.75	1.162e-92	0.5827	Snd1
0.2504	85.29	67.06	1.234e-100	0.5866	Evl
0.2498	75.55	56.97	8.765e-97	0.5835	Lpp
0.2495	70.67	49.67	3.298e-131	0.5957	Eri3
0.2494	98.28	90.58	2.49e-59	0.5669	Runx1
0.2492	72.98	52.2	1.16e-129	0.5958	Ttc7
0.2488	90.71	73.73	4.246e-85	0.58	Abi3
0.2486	85.46	67.45	4.869e-94	0.5837	Tbl1xr1
0.2486	83.92	66.15	8.47e-85	0.5793	Tbc1d16
0.2485	75.43	54.05	3.868e-135	0.5984	Ppp6r3
0.2485	70.36	49.21	2.566e-133	0.5963	Rb1
0.2477	56.96	45.74	2.996e-51	0.5579	Fgf13
0.247	71.83	49.61	1.486e-136	0.5977	Atp9b
0.247	76.25	54.99	5.6e-125	0.5948	Tnrc6a
0.247	83.66	63.94	2.033e-102	0.587	Abi1
0.2465	79.73	58.9	1.582e-112	0.5906	A630001G21Rik
0.2464	68.11	50.43	2.264e-102	0.5844	Zfp407
0.2461	70.55	47.49	3.873e-150	0.6019	Vps13d
0.2459	80.2	61.52	2.16e-96	0.5841	Whrn
0.2457	87.14	69.84	6.978e-88	0.581	Tspan14
0.2451	81.08	63.5	8.412e-97	0.5845	Atp2c1
0.2449	77.88	58.66	5.637e-106	0.5878	Fam168a
0.2443	70.16	50.12	3.195e-117	0.5905	Sdccag8
0.2443	83.65	63.53	1.278e-99	0.5858	Fgd2
0.2441	68.19	44.9	1.256e-161	0.6048	Ubr3
0.2441	93.68	79.91	2.907e-85	0.5802	Arid1a
0.2439	68.95	47.4	8.406e-136	0.5967	Map2k5
0.2439	81.64	64.51	8.117e-83	0.5781	Tmem164
0.2436	78.32	59.01	3.627e-102	0.5862	Znrf2
0.2435	67.79	45.79	3.559e-145	0.5995	Fbxl20
0.2435	69.95	50.46	3.505e-111	0.5881	Cdk6
0.2434	66.6	47.29	5.82e-113	0.5879	Gm26542
0.2431	60.22	38.95	9.28e-153	0.5989	Kif13a
0.2425	78.26	58.48	2.415e-103	0.5867	Cdk19
0.2424	72.4	51.06	8.661e-127	0.5945	Eef2k
0.2421	88.72	71.32	1.662e-69	0.572	Lncpint
0.2421	94.27	89.53	3.654e-48	0.5601	Lrmda
0.242	71.93	52.09	4.394e-109	0.5877	Rai1
0.2419	77.99	58.98	8.627e-97	0.5839	Tec
0.2418	82.3	63	5.286e-98	0.585	Abl1
0.2413	74.48	56.53	4.035e-93	0.5818	Trappc9
0.2411	78.07	56.98	9.436e-102	0.5858	Fnip1
0.2408	79.97	59.9	1.63e-106	0.5882	Slmap
0.2407	77.66	59.94	4.602e-89	0.5805	Tbl1x
0.2402	83.42	66.21	1.188e-77	0.5758	Atxn7l1
0.2401	71.14	49.55	2.658e-125	0.5935	Cog5
0.2398	73.58	51.24	3.687e-129	0.5955	Pias1
0.2397	85.27	69.16	5.061e-77	0.5757	Gng2
0.239	74.05	55.51	3.395e-100	0.5847	Rps6ka3
0.2389	68.57	51.47	7.146e-86	0.5774	Bcas3
0.2389	93.08	80.32	1.998e-66	0.5707	Retreg1
0.2386	63.83	41.97	8.058e-153	0.6005	Tut4
0.2386	93.79	80.36	2.325e-81	0.5784	Nckap1l
0.2383	71.67	50.31	9.992e-128	0.5946	Stxbp5
0.2382	66.63	45.21	3.426e-138	0.5968	Slc7a7
0.238	56.86	36.3	1.198e-150	0.5966	Rfx3
0.238	92.41	79.09	4.81e-71	0.5731	St3gal6
0.2376	58.53	42.01	1.043e-99	0.5804	Akt3
0.2373	62.64	40.6	3.301e-157	0.6013	Faf1
0.2368	71.9	50.57	2.495e-123	0.593	Arid2
0.2366	68.86	49.83	7.014e-106	0.5858	Rasal2
0.2366	69.53	50.73	4.112e-102	0.5844	Tmcc1
0.2359	92.01	77.89	3.869e-70	0.5726	Mbnl2
0.2356	89.86	73.44	4.679e-80	0.5775	Vav1
0.2354	83.11	63.69	2.384e-95	0.5839	Pum2
0.2353	68.07	47.1	1.856e-122	0.5916	Smurf1
0.2351	85.81	67.87	2.545e-83	0.5787	Nfkb1
0.235	75.32	54.93	4.224e-110	0.5888	Cdk13
0.2345	98.01	89.13	1.039e-69	0.5726	Fyb
0.2342	69.53	46.9	5.9e-143	0.5992	Rbm33
0.2342	80.96	62.14	8.65e-95	0.5834	Cep170
0.2338	57.36	36.02	1.198e-161	0.6001	Ebf3
0.2333	95.52	83.02	3.949e-72	0.5738	Soga1
0.2332	85.41	67.35	3.762e-79	0.5767	Irf2
0.2331	64.11	42.61	1.942e-145	0.5982	Pias2
0.2329	75.62	54.01	7.473e-118	0.5918	Rbm26
0.2322	85.15	66.59	2.279e-85	0.5796	Fmnl3
0.232	68.71	47.33	1.177e-128	0.5941	Tnks
0.232	67.96	47.71	9.052e-120	0.5907	Lifr
0.2319	76.9	57.76	1.952e-104	0.587	Arhgap12
0.2316	73	52.94	3.594e-106	0.5868	ENSMUSG00000120400
0.2315	80.14	61.01	2.045e-94	0.5831	Gsk3b
0.2314	83.5	65.16	1.903e-88	0.5809	Kmt2e
0.2313	67.82	47.39	2.256e-122	0.5916	Rps6kc1
0.2312	77.19	60.07	7.793e-73	0.5727	Kcnk13
0.2307	61.65	40.1	1.472e-148	0.5981	Dennd1b
0.2307	70.01	49.58	4.031e-121	0.5918	Usp15
0.2307	61.31	48.94	7.178e-54	0.5603	Immp2l
0.2306	80.49	61.51	5.093e-93	0.5826	Stag2
0.2302	84.12	66.81	2.797e-75	0.5747	Capn3
0.2301	71.45	49.37	6.966e-128	0.5945	Pum1
0.2292	63.34	43.47	1.469e-123	0.5906	Nlk
0.2288	62.11	40.14	1.544e-152	0.5995	Acvr1
0.2288	87.33	70.82	4.702e-67	0.5707	Extl3
0.2285	69.14	49.69	2.618e-108	0.5868	Cryl1
0.2281	74.69	54.08	7.183e-99	0.584	Cnot4
0.228	76.19	56.65	1.152e-99	0.5847	Atf7ip
0.2276	68.33	46.63	1.458e-132	0.5953	Scaf8
0.2276	70.41	51.47	3.819e-106	0.5863	Chd2
0.2271	60.35	40.61	1.469e-123	0.5894	Adcy9
0.2271	74.51	53.9	1.651e-110	0.5888	Itch
0.227	60.78	40.34	2.047e-132	0.5926	Mgll
0.2269	77.5	57.54	3.241e-101	0.5856	Sla
0.2268	67.76	47.32	3.338e-116	0.5893	Zfp532
0.2266	73.44	55.04	1.131e-92	0.5813	Tnfrsf11a
0.226	86.19	68.02	6.684e-74	0.5741	Pacsin2
0.2259	67.51	48	3.645e-106	0.5854	Galnt10
0.2255	96.66	88.18	4.076e-52	0.5626	Ly86
0.2253	73.1	52.54	3.471e-107	0.5871	Ube2k
0.2249	66.8	45.3	4.425e-134	0.5953	Rasa1
0.2246	73.87	53.82	1.925e-104	0.5862	Arid4a
0.2244	79.89	60.76	9.84e-88	0.5801	Rap1a
0.224	60.58	38.06	1.045e-161	0.6015	Ptbp2
0.224	70.14	56.32	2.809e-57	0.5637	Kcnma1
0.2231	68.41	46.88	2.887e-131	0.5949	Lrp5
0.2231	67.11	45.37	1.971e-132	0.5948	Helz
0.2225	63.94	42.02	9.324e-143	0.5971	Ecpas
0.2225	51.01	31.67	5.103e-142	0.5907	Khdrbs3
0.2224	75.43	54.96	4.519e-105	0.5868	Mon2
0.2224	83.34	64.91	1.517e-69	0.5716	Pnpla7
0.2223	99.77	96.12	1.196e-106	0.59	Lyn
0.2222	58.46	37.92	2.39e-137	0.5931	Scmh1
0.2216	69.15	49.01	3.107e-108	0.5866	Mlxip
0.2215	74.04	55.44	9.966e-89	0.5796	Tcf20
0.2214	87.11	69.24	7.148e-64	0.5689	Rbm25
0.2211	99.95	98.02	4.075e-126	0.598	Epb41l2
0.2211	98.26	90.34	1.911e-66	0.5708	Hpgds
0.2205	82.83	65.37	1.178e-75	0.5747	Apc
0.2204	69.59	48.91	2.473e-113	0.5887	Setd3
0.2204	79.65	59.59	8.858e-92	0.5818	Pnisr
0.2202	61.96	41	8.796e-133	0.5931	Dym
0.22	91.67	77.46	6.027e-56	0.5647	Sipa1l2
0.2196	83.6	65.02	6.367e-80	0.5768	Wdr26
0.2194	57.17	36.15	3.961e-149	0.5961	Mbtd1
0.2194	88.02	71.78	8.602e-70	0.5722	Tjp1
0.2193	65.86	44.24	7.094e-129	0.5931	Insr
0.2192	62.19	40.98	3.976e-138	0.595	Tbck
0.219	62.99	43.48	7.908e-112	0.5861	Garnl3
0.2189	68.82	47.65	3.112e-116	0.5895	Herc4
0.2185	80.54	62.24	2.011e-83	0.5782	Stab1
0.2184	62.35	41.6	1.755e-133	0.5935	Zmym4
0.2184	90.05	74.43	5.952e-55	0.5641	Myo1f
0.2181	73.9	53.43	2.294e-98	0.5836	Ube2h
0.2181	74.21	57.12	7.494e-73	0.5723	Chst11
0.218	85.34	67.23	4.234e-75	0.5746	Ncor1
0.218	99.3	93.55	7.438e-68	0.5716	Dst
0.2179	98.73	92.85	7.652e-71	0.5732	Entpd1
0.2176	82.79	65.84	7.735e-64	0.5686	Acer3
0.2175	67.18	49.47	9.817e-92	0.5796	Pacs1
0.2173	62	40.88	2.202e-137	0.5946	Atad2b
0.2173	91.13	74.58	1.124e-58	0.5663	Rbm39
0.2171	78.22	59.7	1.031e-78	0.5756	Ints6l								Tgfbr1
0.2169	69.8	49.68	2.26e-97	0.5823	Fnip2								Mertk
0.2167	75.61	54.98	2.087e-96	0.5831	Ubr5								Mef2c
0.2163	88.61	74.66	1.698e-54	0.5638	Lims1								Bin1
0.2162	74.13	53.82	6.474e-99	0.5839	Zmynd11								Bin1
0.2161	70.06	49.81	1.826e-107	0.5865	Rapgef6
0.2159	77.69	58.44	1.771e-84	0.5782	Zfp292								Smad3
0.2157	77.24	57.89	2.283e-90	0.5809	Larp4b								Mef2a
0.2155	80.03	63.79	3.238e-66	0.5697	Tbc1d9
0.2155	88.1	71.06	4.126e-65	0.5697	Git2
0.2154	65.69	44.67	3.943e-122	0.5907	Asxl1
0.2151	91.81	77.19	2.101e-52	0.5626	Fnbp1
0.2147	60.2	40.82	1.823e-114	0.5861	Fry
0.2146	69.86	49.21	2.372e-108	0.5867	Mark2
0.2145	66	46.66	3.888e-101	0.5829	Znrf1
0.2141	57.25	36.32	1.023e-150	0.5967	Ube3c
0.2141	73.64	53	9.342e-106	0.5866	Gtf2i
0.214	84.02	69.53	2.896e-52	0.5622	Snx24
0.2138	78.44	59.8	9.777e-85	0.5785	Pald1
0.2138	81.73	66.52	4.108e-54	0.5631	Pvt1
0.2137	66.4	47.18	1.894e-102	0.5836	Suclg2
0.2137	67.95	48.67	2.499e-101	0.5836	Tnrc6c
0.2137	71.08	52.81	1.552e-92	0.5808	Ubac2
0.2135	69.05	48.18	1.155e-113	0.5886	Fryl
0.2135	68.84	50.72	6.675e-92	0.58	Rsrc1
0.2134	75.09	55.06	1.1e-94	0.5823	Tnrc18
0.2134	67.26	53.59	5.727e-54	0.5613	Fat3
0.2133	59.54	40.93	8.631e-111	0.5846	AW554918
0.2129	61.34	41.39	4.678e-121	0.5889	Myo1b
0.2127	76	55.78	5.012e-91	0.5808	Dnajc13
0.2122	73.36	53.62	7.431e-96	0.5825	Heatr5a
0.2121	56.51	38.09	1.151e-112	0.584	Nol4l
0.212	78.31	60.23	9.345e-75	0.5737	Rbm47
0.2115	69.59	50.48	6.791e-100	0.5835	Nfatc2
0.2114	67.45	49.53	6.865e-88	0.5779	Peak1
0.2112	67.86	47.24	3.279e-115	0.5889	Wac
0.2112	80.74	62.1	5.151e-79	0.5761	Syk
0.2111	88.03	71.4	3.695e-57	0.5652	Ptpra
0.2109	65.71	46.09	3.222e-107	0.5852	Zfp644
0.2109	70.6	52.49	4.892e-78	0.574	Apbb2
0.2105	63.66	44.79	1.104e-106	0.5845	Sgms1
0.2103	87.07	70.5	9.386e-65	0.5694	Tab2
0.2101	75.55	55.87	1.719e-92	0.5815	Nfatc1
0.2101	98.09	90.76	1.571e-64	0.5698	Abca9
0.2101	83.64	66.35	2.312e-61	0.5673	Map4
0.2101	86.49	69.98	4.91e-51	0.5615	Ifitm10
0.2097	78.8	59.73	9.332e-82	0.5771	Aftph
0.2094	63.52	43.67	6.412e-113	0.5867	Tmem131l
0.2092	83.99	66.46	2.258e-68	0.5711	Phyhd1
0.2091	65.61	45.88	6.904e-111	0.5867	Osbpl8
0.2091	83.62	65.06	1.357e-68	0.5711	Cerk
0.2089	79.85	60.39	2.197e-81	0.577	Ep300
0.2089	92.62	81.56	1.032e-52	0.5629	Fam102b
0.2088	61.26	41.3	3.274e-116	0.587	Dis3l2
0.2084	61.3	40.42	3.806e-130	0.5919	Fam13b
0.2083	81.27	63.01	1.958e-71	0.5724	Huwe1
0.2081	69.95	49.55	3.671e-107	0.5863	Tmem170b
0.2081	64.39	44.78	1.218e-108	0.5854	Vps41
0.2074	72.94	52.81	1.273e-96	0.5827	Kdm3b
0.2071	71.35	51.68	1.279e-94	0.5815	Ets1
0.2065	72.55	51.99	3.311e-100	0.5841	Cul1
0.2065	65.83	45.81	8.343e-104	0.5838	Rapgef2
0.2057	77.3	59.57	2.87e-71	0.5719	Fndc3b
0.2054	61.66	40.5	6.907e-131	0.5922	Ehmt1
0.2054	62.31	41.44	1.388e-122	0.5896	Rhobtb1
0.2054	76.9	57.73	6.397e-77	0.5745	Aim2
0.2054	63.87	49.42	3.644e-66	0.5672	Cradd
0.2048	68.17	49.62	3.087e-93	0.5803	Acsl4
0.2045	66.42	45.8	3.408e-112	0.5872	Arfgef1
0.2045	67.63	47.6	1.462e-105	0.5851	Chd6
0.2045	98.17	90.27	7.376e-51	0.5619	Abhd12
0.2044	66.13	44.84	1.739e-118	0.5894	R3hdm2
0.2039	67.78	47.05	4.433e-103	0.584	Vps54
0.2038	86.44	70.16	4.944e-56	0.5645	Zfp652
0.2036	61.01	40.33	3.548e-126	0.5904	Gigyf2
0.2033	98.11	89.8	9.556e-52	0.5624	Wnk1
0.2033	90.09	76.56	9.009e-48	0.5597	Asph
0.2027	87.26	71.13	1.632e-55	0.5642	Il10ra
0.2025	66.53	45.77	7.56e-109	0.5859	Cmtm7
0.2025	98.62	92.24	1.594e-66	0.5709	Lpcat2
0.2024	78.67	60.97	4.491e-72	0.5725	Ppp2r5c
0.2023	72.12	60.32	2.213e-47	0.5583	Ext1
0.2016	65.8	45.64	2.88e-110	0.5864	Rsf1
0.2016	78.86	59.78	4.257e-75	0.5739	Papola
0.2015	80.16	61.94	4.076e-72	0.5726	Ncor2
0.201	72.04	52.82	8.244e-83	0.5764	Fbxo11
0.2008	55.66	36.66	2.485e-123	0.5873	Fbxw7
0.2006	62.04	42.16	8.478e-113	0.5861	Exoc6
0.2006	71.25	50.87	3.715e-97	0.5825	Med13
0.2005	66.54	47.02	1.48e-97	0.5815	Pign
0.2003	66.23	47.05	6.492e-95	0.5804	Aak1
0.2002	89.43	75.8	3.814e-49	0.5606	Nr3c1
0.2001	66.18	48.31	2.721e-83	0.5755	Lcorl
0.1999	65.02	45.6	2.36e-102	0.5831	Nlrp1c-ps - ENSMUSG00000092528
0.1999	64.08	44.92	2.2e-100	0.582	Tln2
0.1999	70.29	51.09	9.72e-96	0.5818	Hps3
0.1998	58.7	38.03	8.949e-135	0.5923	Zmym2
0.1998	61.41	41.07	3.618e-118	0.5877	Evi5
0.1998	64.65	45.18	1.02e-105	0.5843	Bicra
0.1998	78.97	60.72	3.367e-70	0.5715	Lpin2
0.1995	96.54	85.91	1.745e-47	0.5597	Wasf2
0.1994	62.58	42.69	3.791e-112	0.586	Rabep1
0.1992	69.34	50.29	3.372e-93	0.5805	Osbpl11
0.1991	69.02	48.91	4.242e-98	0.5824	Zfr
0.199	80.28	63.1	1.914e-64	0.5687	Cflar
0.1989	65.98	46.31	1.166e-100	0.5826	Osbpl9
0.1989	75.23	56.02	4.312e-84	0.5776	Casp8
0.1989	82.56	63.28	1.298e-66	0.5699	Sfpq
0.1989	81.34	63.6	1.314e-65	0.5694	Cd2ap
0.1987	68.22	49.78	1.009e-84	0.5766	Plekhm3
0.1982	89.61	79.58	8.077e-26	0.5436	Arsb
0.198	53.6	34.11	1.436e-131	0.5888	Armh3
0.198	66.88	47.41	5.414e-99	0.5823	Slc4a7
0.198	69.22	49.73	6.273e-92	0.5799	Ccny
0.198	65.08	47.38	1.798e-87	0.5771	Rffl
0.1977	64.11	46.84	2.316e-80	0.5737	Nsmce2
0.1976	62.69	41.6	3.352e-126	0.591	Usp48
0.1976	67.48	47.38	2.281e-103	0.5841	Atp13a3
0.1974	70.47	50.32	2.964e-94	0.5811	Thoc2
0.1973	56.94	40.4	1.785e-85	0.5738	Eml6
0.1971	63.39	43.68	9.225e-106	0.5838	Ascc3
0.197	58.84	38.34	7.267e-127	0.5897	Zzz3
0.1969	73.02	53.27	4.295e-89	0.5794	Rbm5
0.1966	58.31	39.26	5.604e-113	0.5848	Fbxw4
0.1966	65.08	46.54	4.97e-97	0.5811	Pla2g4a
0.1965	76.08	59.51	1.346e-62	0.5672	Cask
0.1964	58.51	38.78	2.669e-122	0.5881	Akap10
0.1964	73.47	53.37	3.35e-86	0.5782	Setd2
0.1962	95.98	85.98	7.417e-47	0.5593	Tgfbr2
0.1961	58.08	39.83	1.505e-103	0.5813	Scaper
0.1959	58.97	41.82	5.567e-91	0.5768	Stx8
0.1959	94.37	84.78	5.808e-39	0.5539	Abca1
0.1958	87.6	71.96	7.43e-57	0.5651	Dnm2
0.1955	81.87	63.99	2.345e-63	0.5682	Pkn1
0.1953	67.79	47.83	6.722e-100	0.5828	Kdm2a
0.1953	61.27	42.88	2.781e-99	0.5808	Stambpl1
0.1952	85.91	69.18	1.866e-59	0.5664	Kat6a
0.1949	45.95	31.27	4.663e-84	0.5685	Dlc1
0.1947	62.08	43.62	9.274e-97	0.58	Kansl1l
0.1946	61.99	43.9	7.39e-94	0.5788	Stk3
0.1944	54.36	36.19	2.751e-110	0.5821	Eefsec
0.1944	65.61	46.3	3.568e-97	0.5811	Lrch3
0.1944	74.77	55.81	3.096e-79	0.5753	Ccdc93
0.1944	74.65	56.55	1.919e-73	0.5725	Fndc3a
0.1942	67.98	51.04	8.115e-75	0.5721	Dnajc1
0.1939	93.71	84.12	3.335e-35	0.5512	E230029C05Rik
0.1937	80.77	64.38	4.703e-56	0.5641	Rtn3
0.1935	64.33	46.16	5.765e-88	0.577	Hipk2
0.1935	76.02	58.57	2.324e-65	0.5686	Foxo3
0.1932	82.27	66	4.645e-54	0.563	Oxct1
0.1931	62.45	42.13	3.97e-112	0.5858	Bltp1
0.1931	65.61	45.43	2.183e-106	0.5848	Mtr
0.1931	61.08	45.11	5.84e-73	0.5696	Hdac8
0.193	71.52	53.02	1.984e-81	0.5758	Tbc1d14
0.1929	96.97	87.69	4.219e-42	0.5562	Zmiz1
0.1928	83.72	66.96	2.986e-51	0.5614	Stard9
0.1924	55.02	36.9	9.935e-104	0.58	Svil
0.1922	96.71	86.94	1.667e-40	0.5551	Lair1
0.1921	57.07	38.84	1.163e-105	0.5817	Pdlim5
0.1921	84.25	67.56	1.687e-52	0.5622	Erbin
0.1919	58.16	38.06	1.587e-122	0.5879	Memo1
0.1919	64.19	45.13	5.418e-96	0.5803	Epb41
0.1919	72.81	53.58	2.409e-79	0.5749	Nsd3
0.1918	75.66	58.63	9.869e-60	0.5656	Gm5086
0.1913	65.49	47.54	4.804e-80	0.5738	Zfp608
0.1913	88.86	74.63	2.534e-46	0.5587	Slc7a8
0.1913	92.16	79.2	6.387e-41	0.5552	Pik3r1
0.1912	71.63	52.63	2.547e-75	0.5728	Nlrp1b
0.1912	83.22	65.96	3.369e-56	0.5643	Notch2
0.191	64.46	44.46	1.373e-104	0.5837	Dmxl1
0.191	63.35	44.69	8.752e-95	0.5796	Atxn7
0.1908	99.91	97.82	5.414e-94	0.5845	Macf1
0.1907	69.24	49.32	1.176e-90	0.5792	Senp6
0.1904	71.93	52.47	2.049e-81	0.5757	Rock1
0.1904	77.19	59.37	7.83e-64	0.5679	Elk3
0.1904	81.49	64.84	1.095e-56	0.5645	Pik3cd
0.1902	71.02	51.77	5.5e-85	0.5772	Crlf3
0.1901	57.78	38.18	5.483e-117	0.5859	Ralgapa1
0.19	54.54	33.58	2.323e-146	0.5937	Prpsap2
0.19	64.61	44.95	3.937e-105	0.584	Rnf111
0.1897	67.69	48.41	7.96e-94	0.5803	Pds5a
0.1895	62.58	42.86	2.548e-103	0.5826	Ppp2r5e
0.1894	81.41	64.26	3.118e-51	0.5612	Peli1
0.1887	68.18	48.46	6.971e-91	0.5791	Pcm1
0.1886	59.43	40.66	9.952e-104	0.5818	Ggta1
0.1884	78.4	60.06	3.432e-66	0.5693	Mknk1
0.1881	81.88	65.64	1.937e-56	0.5644	Itgav
0.1879	56.21	35.43	1.055e-134	0.5909	Tent2
0.1879	64.19	44	2.746e-104	0.5834	Zc3h7a
0.1877	60.81	40.8	1.291e-107	0.5835	Dock7
0.1876	62.29	44.98	1.005e-80	0.5733	Nedd4l
0.1873	55.94	42.13	6.11e-63	0.5634	Nr3c2
0.1872	56.58	36.09	5.732e-130	0.5896	Brwd1
0.1872	63.56	44.93	4.215e-89	0.5772	Ano6
0.187	72.81	53.53	5.696e-79	0.5748	Tmem131
0.1868	65.63	46.56	1.79e-93	0.5796	Asxl2
0.1867	86.6	70.01	1.131e-44	0.5575	Ptbp3
0.1866	67.33	48.24	2.324e-87	0.5774	Tasor
0.1866	73.81	55.69	8.945e-75	0.573	Bptf
0.1866	54.58	39.98	6.915e-70	0.5662	Ppm1l
0.1862	60.11	43.67	5.091e-79	0.572	Aopep
0.1861	72.95	54.49	7.924e-74	0.5724	Arrb1
0.186	56.48	37.15	1.502e-115	0.5848	Ttc17
0.1859	59.89	40.86	2.961e-101	0.5809	Tsc22d2
0.1859	77.11	59.11	6.001e-61	0.5663	Taok3
0.1858	97.11	88.84	1.527e-43	0.5571	Smap2
0.1857	67.19	47.83	2.522e-88	0.5778	Gpatch8
0.1856	55.16	35.66	1.29e-123	0.5869	Nt5c2
0.1854	66.83	48.29	3.836e-84	0.5759	Nfat5
0.1854	49.2	34.17	1.46e-84	0.5704	Ust
0.1853	86.11	70.57	3.207e-50	0.561	Cbl
0.1851	83.8	68.44	5.223e-53	0.5626	Fam91a1
0.1849	60.09	40.85	4.008e-106	0.5828	Dennd6a
0.1848	61.27	41.21	8.826e-105	0.5826	Kif13b
0.1846	43.76	29.35	1.077e-86	0.5684	Pbx3
0.1845	59.16	39.56	4.636e-109	0.5835	Pik3ca
0.1844	68.05	49.8	4.452e-82	0.5753	Arhgef6
0.1843	60.38	40.4	1.441e-110	0.5845	Rsbn1l
0.1843	48.51	31.44	1.038e-111	0.5797	Ppp1r12b
0.1842	53.6	35.26	2.275e-111	0.5821	Nrf1
0.1841	51.24	32.01	1.062e-130	0.5871	Usp3
0.1841	61.5	42.28	2.639e-99	0.5807	Sltm
0.1841	62.54	44.04	3.62e-90	0.5773	Sgk3
0.184	67.09	48.86	1.183e-79	0.574	Zfand6
0.1837	61.31	42.24	3.463e-102	0.5818	Abcc5
0.1834	60.19	40.59	8.523e-107	0.5831	Epc1
0.1834	60.05	40.77	1.71e-105	0.5826	Rabgap1
0.1829	53.91	34.87	2.434e-116	0.5838	Rngtt
0.1824	61.73	46.1	7.463e-68	0.5673	Arhgap31
0.1823	86.61	70.71	3.25e-45	0.5578	Rnf13
0.182	100	99.49	3.954e-98	0.5863	Malat1
0.1819	49.02	30.07	8.804e-132	0.5861	Btrc
0.1819	59.57	41.05	1.934e-100	0.5806	Mapkap1
0.1818	72.12	53.46	1.392e-71	0.5711	Vgll4
0.1817	69.11	51.03	2.645e-80	0.5748	Tpst2
0.1815	52.44	32.38	6.006e-137	0.5896	Uhrf2
0.1815	66.57	47.37	1.724e-87	0.5772	Hmbox1
0.1813	50.14	30.47	5.349e-141	0.5896	Map4k5
0.1811	67.88	49.22	3.986e-81	0.5748	Fam117b
0.1809	25.22	15.74	2.33e-64	0.5475	Nhs
0.1808	57.89	38.17	1.42e-114	0.585	Rb1cc1
0.1806	53.27	34.45	1.585e-112	0.5822	Gm4258
0.1804	73.14	53.72	1.557e-73	0.5721	Mdm4
0.1802	67.21	48.17	1.604e-86	0.577	Zdhhc20
0.1802	84.94	67.68	3.851e-46	0.5583	Ddx17
0.1801	54.97	36.65	1.08e-108	0.5818	Kdm6a
0.18	56.25	36.97	3.695e-113	0.5838	R3hdm1
0.1799	53.86	34.97	1.461e-116	0.5839	Oma1
0.1799	60.38	40.71	1.898e-106	0.583	Pik3cb
0.1798	58.34	39.48	6.191e-102	0.5806	Dagla
0.1795	77.93	59.78	1.12e-59	0.5657	Tnpo1
0.1792	57.2	38.44	3.045e-103	0.5806	Sesn1
0.179	62.29	44.45	5.776e-82	0.5738	Gbf1
0.1789	77.63	62.65	4.816e-51	0.5609	Cmklr1
0.1787	67.25	47.87	3.859e-87	0.5772	Sft2d1
0.1787	82.29	65.75	1e-50	0.561	Sort1
0.1784	62.61	44.06	3.113e-89	0.5769	Arhgef12
0.1781	63.2	43.42	1.057e-99	0.5813	Cpsf6
0.178	66.19	46.9	1.175e-88	0.5776	Ogt
0.178	83.06	67.44	1.698e-40	0.5545	Ptk2b
0.1779	58.34	38.59	3.473e-112	0.5843	Atxn2
0.1779	65.34	45.74	2.504e-90	0.5781	Smchd1
0.1779	64.14	45.55	1.124e-86	0.5763	Wdr33
0.1779	65.95	46.69	1.442e-82	0.5748	Lyst
0.1779	89.75	76.25	1.189e-41	0.5557	Mtdh
0.1777	60.38	41.74	6.293e-92	0.5773	Nr2c2
0.1777	67.11	48.69	3.555e-79	0.5737	Fbxw11
0.1777	47.41	31.46	1.477e-95	0.5735	Fggy
0.1775	81.77	63.85	1.438e-48	0.5596	Trip12
0.1772	60.31	42.02	9.894e-91	0.5769	Hmg20a
0.1772	69.93	50.39	1.766e-78	0.5739	Morc3
0.1771	54.28	34.87	2.161e-122	0.5861	Relch
0.1771	59.32	40.39	4.419e-98	0.5794	Dlg1
0.1771	49.11	31.83	8.202e-108	0.5786	Trim2
0.1771	71.68	54.65	3.249e-64	0.5674	Rab10
0.1771	47.3	33.03	1.631e-77	0.5666	Chst8
0.1771	90.17	76.5	1.18e-36	0.5522	Adam10
0.177	69.18	49.73	6.127e-76	0.5725	Cep350
0.1769	56.23	37.42	7.021e-108	0.5819	Vps8
0.1764	62.07	43.92	4.573e-83	0.5741	Acss1
0.1763	44.98	26.06	3.438e-147	0.5878	Rab3ip
0.1763	62.22	43.37	6.528e-93	0.5783	Prr14l
0.1759	55.25	35.99	1.247e-116	0.5846	Usp47
0.1759	65.13	47.63	7.306e-79	0.5732	Tle4
0.1758	56.65	38.17	1.103e-103	0.5806	Pak1
0.1757	65.49	46.2	1.13e-86	0.5766	Ankhd1
0.1754	53.28	37.63	5.489e-79	0.5697	Tspan18
0.1753	93.58	82.38	1.066e-31	0.5485	Tacc1
0.1744	55.94	36.95	4.827e-111	0.5829	Exoc2
0.1743	59.65	40.39	5.577e-101	0.5806	Epc2
0.1743	45.68	28.63	6.956e-116	0.5793	Il15
0.1742	55.44	36.82	2.582e-107	0.5814	Wdr7
0.1739	70.55	52.32	4.304e-72	0.5711	Cxxc5
0.1737	58.17	40.92	2.579e-85	0.574	Chchd3
0.1735	54.9	35.63	1.776e-115	0.584	Ranbp9
0.1734	49.49	36.19	4.054e-64	0.5618	Enox2
0.1733	57.13	38.16	5.267e-105	0.5812	Ppp4r1
0.1733	67.33	49.03	6.906e-75	0.5717	Spred1
0.1733	86.3	69.65	1.693e-35	0.5511	Fus
0.1731	78.23	61.4	2.448e-50	0.5604	Hck
0.1727	66.56	47.8	2.653e-80	0.574	Ntpcr
0.1726	51.68	32.87	1.477e-118	0.5834	Map2k4
0.1725	50.21	32.79	1.854e-106	0.5787	Pibf1
0.1721	54.59	34.99	1.098e-119	0.5852	Zfc3h1
0.1721	59.23	40.81	3.619e-90	0.5762	Rab6b
0.172	53.41	36.88	4.842e-87	0.573	Iqsec2
0.1718	54.86	36.9	6.363e-99	0.5781	Pcca
0.1718	72.89	55.13	1.488e-59	0.565	Nktr
0.1717	56.54	37.13	1.062e-110	0.583	Clasp1
0.1716	47.09	28.6	1.675e-127	0.5835	Mical3
0.1714	56.77	38.39	3.664e-97	0.5781	Gm21992
0.1714	70.9	53.61	1.287e-62	0.5664	Atf6
0.1713	77.62	60.45	9.153e-53	0.5618	Brd4
0.1713	82.47	66.77	5.369e-38	0.5527	Arhgap25
0.1712	53.47	34.2	1.64e-115	0.5832	Dcaf5
0.1712	36.94	21.89	4.392e-114	0.5725	Adamts16
0.1709	95.7	85.71	8.897e-27	0.5445	Ski
0.1707	63.56	45.02	1.56e-81	0.5738	Tmem273
0.1707	71.83	53.5	5.334e-67	0.5687	Rab2a
0.1707	94.58	83.65	2.132e-35	0.5514	Il6ra
0.1706	70.75	54.37	6.455e-54	0.5616	Xpr1
0.1704	58.63	43.06	3.346e-70	0.5675	Sik3
0.1702	64.25	44.97	2.056e-87	0.5765	Ube3a
0.1702	48.65	33.37	1.245e-86	0.5709	Ahcyl2
0.1701	63.16	44.14	4.352e-89	0.577	Arhgef40
0.1699	44.41	28.08	6.885e-107	0.5756	Ehbp1
0.1699	53.13	36.61	7.623e-87	0.5727	Cdyl
0.1699	58.82	43.03	3.539e-71	0.568	Atp11c
0.1696	54.25	36.43	1.745e-99	0.578	Ralgps2
0.1695	42.56	25.47	8.018e-126	0.5801	Reps1
0.1689	79.96	65.36	9.838e-40	0.5538	Rcbtb2
0.1688	54.83	36.66	2.053e-102	0.5794	Cep85l
0.1686	61.16	41.58	2.531e-95	0.5788	Tpp2
0.1686	57.92	40.95	8.796e-82	0.5724	Ttc3
0.1683	51.26	32.22	2.363e-119	0.5833	Slc30a9
0.1683	59.19	40.64	6.296e-94	0.5777	Tlk1
0.1682	48.17	31.71	1.197e-94	0.5734	Kcnip3
0.1681	53.06	35.17	1.032e-100	0.5779	Clec16a
0.1681	67.25	49.68	1.038e-68	0.5688	Zmynd8
0.1679	66.38	47.97	4.673e-75	0.5716	Btaf1
0.1678	76.36	57.98	3.794e-59	0.5652	Ddx6
0.1677	73.62	56.66	9.602e-57	0.5636	Rasa3
0.1677	73.79	57.45	5.905e-55	0.5626	P2ry6
0.1675	47.02	31.89	1.099e-84	0.5692	Umad1
0.1674	56.88	38.13	5.24e-103	0.5804	Tbc1d23
0.1672	49.05	31.75	1.285e-105	0.5777	Ksr1
0.1672	58.95	40.11	6.197e-94	0.5775	Cntrl
0.1671	66.8	50.05	6.185e-59	0.5636	Prkch
0.1669	44.73	26.15	1.974e-139	0.5854	Lemd3
0.1668	77.19	60.78	1.781e-46	0.5579	Irak2
0.1667	62.83	44.22	1.909e-84	0.5749	Hltf
0.1666	59.59	40.84	1.038e-92	0.5773	Exoc5
0.1666	69.64	51.3	6.452e-68	0.5688	Dennd5a
0.1666	70.7	52.71	3.489e-67	0.5686	Ankfy1
0.1665	58.77	39.84	4.257e-95	0.5779	Btbd7
0.1665	72.75	54.89	1.504e-53	0.5615	Gsap
0.1663	56.16	40.25	2.183e-72	0.5677	Hs2st1
0.1662	47.23	29.24	1.419e-123	0.5826	Nbas
0.1661	59.88	41.24	1.501e-89	0.5761	Xrn1
0.1658	63.91	44.65	5.849e-84	0.5749	Synj1
0.1657	64.25	46.07	8.922e-77	0.5719	Cnot6l
0.1655	63.43	46.44	6.091e-71	0.569	Rgl1
0.1655	79.43	63.41	1.775e-41	0.5549	Rab31
0.1652	55.04	37.4	9.281e-94	0.5762	Traf5
0.1652	63.08	43.98	1.1e-85	0.5754	Hectd1
0.1651	73.35	55.27	6.281e-61	0.5658	Gna15
0.165	51.81	34.42	1.152e-97	0.5762	Camta1
0.1649	55.65	38.55	4.743e-84	0.5725	9930021J03Rik
0.1647	52.43	33.82	1.068e-113	0.5822	Trappc8
0.1647	59.5	42.08	8.363e-80	0.5719	Arhgef11
0.1644	69.06	53.06	8.281e-53	0.5607	Itpkb
0.1643	57.97	39.46	1.662e-92	0.5766	Gm33989
0.1643	81.26	65.72	2.979e-39	0.5535	Atp2b1
0.1642	64.04	44.87	3.969e-86	0.5759	Ap1g1
0.1642	88.99	75.19	3.707e-29	0.5463	Pros1
0.1639	57.7	40.63	2.683e-78	0.5707	Ubtd1
0.1638	58.05	38.9	8.184e-100	0.5795	Arnt
0.1638	52.77	34.98	2.425e-95	0.5757	Cpeb2
0.1637	71.45	52.86	6.822e-65	0.5675	Ythdf3
0.1636	59.07	41.83	9.841e-78	0.5709	Chsy1
0.1634	48.14	29.55	9.877e-127	0.584	Tlk2
0.1633	50.68	31.66	5.803e-120	0.5832	Zzef1
0.1632	43.46	27.09	2.998e-108	0.5753	Map2k6
0.1632	62.69	44.08	1.974e-82	0.5739	Lrp6
0.1631	59.19	40.27	3.263e-91	0.5765	Arid4b
0.1629	46.25	27.93	1.968e-128	0.5833	Zfp280d
0.1628	53.62	34.51	2.637e-109	0.581	Tmem87a
0.1628	68.68	51.11	3.723e-67	0.5683	Mia2
0.1628	80.49	64.01	7.95e-44	0.5565	Kif21b
0.1627	61.57	43.56	4.874e-80	0.5726	Ago3
0.1624	75.01	57.6	5.3e-51	0.5604	Usp9x
0.1623	62.06	43.15	3.65e-84	0.5744	Ktn1
0.1622	85.22	69.52	3.634e-34	0.5501	Grb2
0.1621	50.21	31.18	1.816e-121	0.5834	Kdm4c
0.1621	68.74	50.96	1.199e-63	0.5664	Aff1
0.162	55.23	38.49	6.843e-81	0.571	4732471J01Rik
0.162	79.55	64.25	8.925e-35	0.5502	Abr
0.1614	62.73	44.19	4.584e-81	0.5733	Pbrm1
0.1613	54.24	36.32	2.023e-96	0.5768	Baz1a
0.1613	39.66	23.62	3.707e-119	0.576	Nr6a1os
0.1612	57.88	38.75	1.819e-100	0.5797	Arglu1
0.1612	64.11	46.36	7.336e-75	0.571	Arap3
0.161	61.83	43.08	7.95e-85	0.5747	Phc3
0.161	66.59	48.47	7.529e-67	0.5676	Pcmtd1
0.161	56.82	41.45	8.254e-66	0.5648	Galnt7
0.1609	63.64	45.93	5.562e-68	0.5675	Snx30
0.1608	53.16	34.57	6.613e-106	0.5797	Cert1
0.1608	78.82	62.53	2.886e-45	0.5573	Ccdc50
0.1607	64	46.69	1.3e-72	0.57	Map2k1
0.1607	99.08	95.05	2.094e-47	0.5597	Itgb5
0.1606	67.91	49.74	3.415e-67	0.5681	Ptpre
0.1605	55.06	36.84	6.662e-96	0.5769	Plcg1
0.1605	55.61	37.36	9.371e-95	0.5766	Pepd
0.1604	56.58	38.97	1.503e-87	0.5742	Rnf38
0.1603	56.81	38.02	6.275e-99	0.5787	Tbk1
0.1602	47.25	30.67	3.121e-99	0.5745	Acvr2a
0.1602	60.08	42.65	1.158e-81	0.573	Trpm7
0.1602	68.07	49.76	5.894e-66	0.5674	Usp12
0.1601	57.69	39.3	5.03e-92	0.5764	Mib1
0.1601	53.98	37.51	1.697e-82	0.5713	Slc38a9
0.1601	79.5	63.01	3.349e-43	0.556	B4galt1
0.1597	55.9	37.99	4.821e-91	0.5753	Smad2
0.1597	57.3	39.12	4.23e-88	0.5746	Vps13c
0.1597	63.07	44.34	2.294e-81	0.5735	Srcap
0.1597	74.33	56.63	3.683e-54	0.5621	Stk10
0.1596	52.13	34.15	1.908e-103	0.5784	Htt
0.1595	43.45	26.35	2.841e-120	0.579	Ttc7b
0.1595	59.07	40.33	1.298e-86	0.5745	Trak1
0.1592	61.23	43.66	2.008e-78	0.5719	Phf20l1
0.1591	48.8	31.8	2.59e-102	0.5765	Usp6nl
0.159	50.97	32.94	3.927e-110	0.5803	Ubr1
0.1589	59.08	40.46	1.699e-89	0.5758	Fam120a
0.1588	55.02	36.48	3.615e-100	0.5784	Cul3
0.1588	69.61	50.72	7.529e-67	0.5681	Trpc4ap
0.1587	50.97	33.13	2.152e-105	0.5786	Ube4b
0.1587	54.77	37.06	1.388e-91	0.5751	Gm28047
0.1586	55.82	40.13	1.584e-71	0.5672	Bcl9
0.1585	82.52	66.86	2.799e-36	0.5515	Ncoa3
0.1581	55.56	37.27	8.892e-95	0.5766	Rubcnl
0.158	50.44	32.04	3.092e-109	0.5795	Snta1
0.158	47.95	30.5	9.104e-108	0.5778	Aatf
0.1579	75.82	59.14	1.834e-44	0.5564	Rhoq
0.1579	85.42	70.37	5.241e-31	0.5477	Lnpep
0.1578	54.56	36.98	3.905e-88	0.5736	Cfap74
0.1575	77.21	59.01	1.909e-47	0.5584	Snrnp70
0.1574	67.44	49.03	8.357e-68	0.5682	Gapvd1
0.1573	64.87	47.43	4.697e-65	0.5664	Trim44
0.1571	58.27	40.79	2.098e-80	0.5718	Cept1
0.1568	48.76	31.82	3.203e-98	0.5749	Sipa1l3
0.1568	47.83	32.4	7.444e-83	0.5688	Agap1
0.1568	94.96	84.69	2.766e-28	0.5458	Cyth4
0.1567	46.14	30.6	6.831e-91	0.5711	Copg2
0.1567	62.88	44.97	1.882e-73	0.5699	Hs6st1
0.1566	46.45	30.25	5.893e-96	0.5729	Denn2b
0.1565	35.88	23.45	3.543e-76	0.5597	2210408I21Rik
0.1563	64.84	46.17	3.805e-76	0.5716	Bclaf1
0.1562	68.82	49.93	1.567e-67	0.5683	Hnrnph1
0.1561	66.6	48.02	5.651e-69	0.5686	Cnot1
0.156	53.1	33.91	2.435e-111	0.5815	Slc36a1
0.156	55.86	37.91	6.181e-89	0.5744	Aagab
0.1554	72.48	55.74	9.445e-51	0.5599	Gspt1
0.1554	51.93	38.16	8.982e-56	0.5584	Kcnq1ot1
0.1552	54.29	39.43	3.634e-66	0.5643	Sncaip
0.1549	50.06	32.7	1.145e-100	0.5764	Nf2
0.1549	65.77	47.44	1.855e-67	0.5677	Tm6sf1
0.1548	65.73	47.95	1.131e-68	0.5684	Myo18a
0.1546	54.13	36.93	1.352e-85	0.5725	Braf
0.1546	62.1	43.85	1.978e-77	0.5715	Slf2
0.1543	55.16	37.1	1.497e-92	0.5756	Eps15l1
0.154	62.75	45.53	4.026e-69	0.5679	Dhx9
0.1539	63.34	45.64	2.425e-69	0.5681	Map3k2
0.1539	74.21	57.32	4.643e-48	0.5585	P2rx7
0.1539	89.03	76.15	9.353e-27	0.5443	Jak1
0.1538	51.33	34.46	3.615e-77	0.5676	ENSMUSG00000120942
0.1536	84.16	66.98	7.065e-35	0.5505	Arhgap45
0.1535	38.5	26.39	1.573e-64	0.5567	Setbp1
0.1535	93.6	81.79	3.517e-18	0.5364	Csf3r
0.1534	71.44	54.17	2.884e-53	0.5612	Spag9
0.1533	79.41	63.16	1.62e-38	0.5528	Slc16a6
0.1532	48.34	33.03	1.075e-81	0.5686	Slc10a7
0.1531	56.34	38.33	3.454e-88	0.5743	Xrn2
0.1529	71.01	53	2.558e-55	0.5623	Kmt2a
0.1529	73.87	55.7	4.062e-52	0.5608	Tnks2
0.1529	78.23	62.17	1.275e-41	0.5549	Med12l
0.1527	59.96	41.53	1.698e-82	0.5731	Ubr2
0.1527	63.95	45.07	1.149e-70	0.5687	Zup1
0.1526	48.32	31.44	5.329e-99	0.575	Phka2
0.1526	41.84	27	3.226e-92	0.5691	Adgrl2
0.1524	52.39	36.27	1.23e-81	0.5703	Ankib1
0.1524	38.27	24.23	1.604e-88	0.5654	Cux2
0.1523	45.02	28.23	6.785e-104	0.5747	Ssbp3
0.1522	45.83	29.25	8.265e-101	0.5742	Cblb
0.1522	72.89	55.85	7.818e-49	0.5588	Abcc3
0.152	27.33	15.06	2.886e-102	0.5603	D7Ertd443e
0.1519	55.33	37.66	2.357e-88	0.574	Sfswap
0.1517	49.3	32.33	1.628e-96	0.5746	Csnk1g1
0.1517	59.38	41.62	2.658e-78	0.5711	Kmt5b
0.1517	34.23	21.3	2.018e-85	0.5616	Rbfox1
0.1516	61.56	44.03	4.516e-71	0.5685	Nckap5l
0.1515	56.2	38.81	1.164e-83	0.5724	Kdm2b
0.1515	61.97	43.65	1.064e-74	0.5702	Far1
0.1515	55.86	38.72	8.587e-78	0.5698	Pou2f1
0.1513	74.67	57.39	3.146e-47	0.558	Taok1
0.1512	54.16	34.6	6.403e-106	0.5799	Gm35188
0.1512	57.36	39.93	1.018e-80	0.5716	Casd1
0.1512	51.35	37.11	2.38e-61	0.5609	Nrp1
0.1512	90.45	77.95	4.833e-24	0.542	Mtus1
0.1506	46.4	28.27	4.815e-120	0.5807	Raf1
0.1506	49.99	34.35	1.387e-77	0.5675	Ncoa1
0.1506	51.9	40.37	1.589e-43	0.5519	Pbx1
0.1505	58.08	40.39	2.431e-81	0.5721	Rab3gap1
0.1504	52.1	34.44	1.055e-90	0.5735	BC035044
0.1504	51.7	34.67	5.504e-89	0.5728	Pds5b
0.1503	49.34	31.08	6.394e-109	0.5787	Rsbn1
0.1501	71.22	53.77	6.827e-49	0.5586	Xiap
0.1498	59.81	42.18	6.202e-75	0.5697	Nudcd3
0.1497	68.3	51.41	1.721e-53	0.5609	Akap9
0.1496	77.39	61.55	3.811e-39	0.5531	Atp6v0a1
0.1495	58.38	40.72	4.824e-79	0.5711	Kpna3
0.1494	55.13	38.41	2.919e-77	0.5693	Klhl7
0.1489	79.08	64.23	6.959e-35	0.5503	Ubl3
0.1488	46.49	29.14	2.71e-108	0.577	Pxk
0.1486	53.02	36.26	1.63e-81	0.5703	Senp7
0.1485	58.88	40.72	6.505e-80	0.5716	Ss18
0.1485	85.37	71.17	5.438e-27	0.5444	Rtn4
0.1484	66.61	49.18	1.302e-60	0.5644	Fbrsl1
0.1483	64.41	46.6	2.461e-67	0.5673	Adnp
0.1481	48.75	31.91	1.343e-95	0.5739	Irag2
0.148	52.18	34.52	2.004e-93	0.5746	Vrk1
0.148	84.94	70.89	3.483e-26	0.5437	Anxa3
0.1479	80.81	65.71	1.271e-34	0.5502	Rassf2
0.1478	51.32	33.56	7.051e-98	0.5759	Prpf39
0.1477	60.31	41.46	9.867e-78	0.5709	Tra2a
0.1475	47.49	31.07	3.121e-92	0.572	Fut8
0.1475	58.69	41.39	1.999e-72	0.5683	Lpcat3
0.1474	54.94	37.33	6.955e-83	0.5715	Rilpl1
0.1474	89.15	76.43	2.194e-25	0.5432	Otulinl
0.1473	47.76	33.77	9.605e-68	0.5626	Ipcef1
0.147	62.11	44.03	1.997e-72	0.5692	Khdrbs1
0.147	95.2	85.71	1.529e-22	0.5407	Rgs10
0.1469	50.2	33.16	4.846e-93	0.5737	Strada
0.1469	62.49	46.03	7.955e-60	0.5632	Mlph
0.1469	59.01	43.59	5.062e-59	0.562	Rsu1
0.1469	89.22	75.69	5.048e-18	0.5361	Rab8b
0.1467	45.67	28.93	9.271e-104	0.5751	Ino80
0.1466	63.96	48.52	1.12e-48	0.5574	St6gal1
0.1463	73.06	56.05	6.191e-44	0.5557	Senp2
0.1463	79.16	64.51	3.16e-37	0.552	Rnf130
0.1461	56.32	39.22	1.016e-78	0.5704	Mier1
0.1461	60.11	42.37	2.903e-76	0.5704	Dido1
0.146	51.05	33.4	8.627e-97	0.5754	Dmtf1
0.146	51.17	34.98	6.042e-81	0.5694	Il1rl2
0.146	60.34	42.46	3.875e-72	0.5685	Zyg11b
0.146	65.25	47.29	6.217e-64	0.5658	Dnajc7
0.146	62.1	46.57	1.235e-53	0.5598	Spsb1
0.1459	45.48	30.67	2.804e-80	0.5666	Kat6b
0.1459	95.15	84.09	7.026e-15	0.5328	Son
0.1456	58.26	41.69	7.519e-71	0.5675	Naip2
0.1455	52.81	35.79	3.145e-84	0.5713	Cwf19l2
0.1454	73.27	56.79	3.564e-41	0.554	Dpy19l4
0.1453	44.77	29.84	6.456e-80	0.566	E130307A14Rik
0.1452	45.11	27.72	6.477e-112	0.5773	Klhl18
0.1452	51.59	33.93	6.794e-94	0.5745	Pkn2
0.1452	87.96	74.68	4.166e-24	0.542	Capzb
0.1451	51.64	33.71	1.179e-97	0.5759	Wdr37
0.1449	47.1	30.26	1.306e-96	0.5733	Ccm2
0.1449	65.29	48.95	2.124e-53	0.5603	Tgfa
0.1446	55.66	38.75	1.4e-76	0.5692	Srek1
0.1445	48.22	31.29	2.088e-95	0.5735	Arid3b
0.1445	68.49	51.05	1.936e-52	0.5602	Taf15
0.1443	46.29	32.44	4.423e-65	0.5606	Gm35154
0.1441	46.02	29.29	1.649e-100	0.5742	Banp
0.144	96.81	87	4.773e-10	0.5266	Ptprc
0.1439	50.64	33.87	7.362e-86	0.571	Xpo7
0.1439	71.32	53.92	7.787e-50	0.5591	Zbed6
0.1436	45	28.18	9.725e-105	0.575	Depdc5
0.1434	44.92	28.79	2.975e-96	0.5721	Uri1
0.1434	53.89	36.79	1.064e-81	0.5707	Crebrf
0.1434	51.51	35.53	5.906e-79	0.5688	Stat5b
0.1433	46.57	29.99	2.863e-96	0.573	Spopl
0.1433	47.82	31.53	1.625e-90	0.5716	Cyth1
0.1432	41.07	24.73	1.713e-112	0.5749	Atrn
0.143	57.54	39.38	4.557e-81	0.5716	Akap8l
0.143	57.25	39.78	1.22e-77	0.5701	Cab39
0.1429	48.05	30.79	9.207e-100	0.5749	Hectd4
0.1429	46.37	29.84	6.412e-98	0.5735	Nbeal1
0.1429	53.32	38.1	1.807e-65	0.5635	Traf3
0.1429	56.69	42.18	2.445e-56	0.5601	Slc16a7
0.1428	47.69	30.48	4.073e-101	0.5753	Scaf4
0.1428	44.35	28.85	1.005e-89	0.5695	Bckdhb
0.1428	53.87	37.24	1.093e-78	0.5695	Rlf
0.1426	62.8	45.21	2.851e-66	0.5664	Ap1b1
0.1426	61.81	44.89	3.395e-61	0.5636	Tmem245
0.1425	70.75	54.07	4.16e-44	0.5556	Rhoh
0.1424	61.47	44.49	5.299e-64	0.565	Nrros
0.1424	79.27	63.83	6.813e-31	0.5472	Nptn
0.1423	44.06	28.37	5.984e-94	0.5709	Wdr70
0.1422	65.23	49.07	5.207e-54	0.5606	Ctnnd1
0.1419	45.9	29.02	4.08e-102	0.5746	Lonp2
0.1418	48.64	32.75	1.587e-85	0.5702	Ctps2
0.1418	59.01	42.36	2.156e-68	0.5665	Nrd1
0.1417	49.02	31.5	1.675e-99	0.5753	Smad4
0.1415	70.86	53.92	2.616e-49	0.5588	Klf3
0.1414	46.32	28.96	2.901e-106	0.5762	Ranbp10
0.1412	36.74	20.71	3.941e-127	0.5757	Naa16
0.1412	43.3	27.75	4.275e-92	0.5697	Yes1
0.1412	44.91	29.32	1.773e-89	0.5697	Stx18
0.1412	64.62	47.2	7.018e-61	0.5641	Gatad2b
0.1411	51.21	35.07	2.824e-80	0.5691	Cpeb4
0.141	56.05	39.43	1.125e-67	0.5652	Zfp609
0.141	48.63	33.91	3.413e-72	0.5648	Pals2
0.1409	46.67	29.77	7.432e-101	0.5746	Xpo6
0.1409	42.76	26.25	1.571e-106	0.5741	Btbd1
0.1409	62.47	44.7	2.575e-65	0.5658	Dpp8
0.1409	56.97	41.26	3.04e-63	0.5635	Plxdc1
0.1408	35.77	23.38	2.976e-74	0.5588	Glis3
0.1405	47.64	31.53	2.01e-88	0.5707	Vps50
0.1404	46.29	31.48	8.837e-75	0.5647	Pdss2
0.1403	42.92	26	5.174e-112	0.5759	Fam193b
0.1402	55.63	38.65	8.699e-75	0.5683	Ppp4r3b
0.1401	50.51	33.73	7.817e-87	0.5714	Phf20
0.1401	56.71	40.57	9.119e-67	0.5651	Tulp4
0.14	51.29	34.89	1.229e-81	0.5697	Lrpprc
0.14	59.3	42.13	4.263e-69	0.5669	Btk
0.14	48.8	33.01	8.385e-77	0.5666	Rufy3
0.1399	47.09	31.61	1.558e-80	0.5674	Zfp277
0.1398	60.47	42.78	1.019e-69	0.5674	Mgrn1
0.1398	59.2	42.3	2.139e-68	0.5666	Kidins220
0.1398	67.94	51.06	4.033e-50	0.5588	Stk4
0.1398	86.34	71.53	3.742e-22	0.5401	Slc29a3
0.1396	45.76	29.83	3.414e-89	0.57	Ube2g1
0.1396	66.77	50.1	3.226e-51	0.5593	Kdm7a
0.1393	51.33	34.51	1.345e-84	0.5708	Opa1
0.1393	49.98	33.8	6.914e-81	0.5688	Neurl1a
0.1393	39.43	24.64	1.387e-94	0.5682	Srbd1
0.1392	49.22	33.17	1.12e-82	0.5692	Clock
0.1391	53.02	36.17	2.803e-79	0.5693	Ncoa6
0.139	55.17	37.54	1.679e-81	0.571	Akirin2
0.1389	72.41	55.74	1.936e-44	0.556	Csnk1a1
0.1388	38.82	23.11	1.103e-112	0.5734	Tbcd
0.1387	47.21	30.6	1.937e-93	0.5723	Nsmaf
0.1387	59.84	42.99	2.575e-66	0.5657	Psen1
0.1386	44.64	28.91	2.53e-93	0.571	Tom1l1
0.1384	52.51	34.64	2.338e-90	0.5735	Brd1
0.1384	43.04	28.56	2.223e-79	0.5649	Stau2
0.1383	61.73	44.5	1.454e-63	0.5648	Pxn
0.1383	30.41	19.52	1.135e-67	0.5527	Rnf150
0.1381	47.79	31.35	4.014e-89	0.571	Frs2
0.1379	50.66	34.13	1.103e-81	0.5694	Ttc39b
0.1379	60.58	43.98	2.709e-61	0.5634	Trip11
0.1377	56.15	43.61	2.291e-40	0.5509	A830008E24Rik
0.1373	44.54	28.18	3.545e-98	0.5725	Trim33
0.1373	44.88	28.58	4.045e-93	0.5708	Kat2b
0.1373	42.29	26.75	2.088e-95	0.5702	Abcb4
0.1373	79.2	63.96	7.26e-32	0.548	Dtx4
0.1372	51.47	34.82	2.448e-81	0.5696	Galnt2
0.1371	38.24	22.93	4.478e-99	0.5685	Upk1b
0.137	56.84	40.48	3.351e-67	0.5653	Slc40a1
0.137	74.06	58.85	2.55e-31	0.5471	Cd180
0.1368	58.78	42.11	2.178e-66	0.5655	Tpcn1
0.1366	53.51	37.59	9.091e-67	0.564	Tfeb
0.1365	60.61	43.25	3.008e-65	0.5653	Gak
0.1365	54.7	40.42	3.707e-56	0.5594	Creb1
0.1364	32.21	18.58	8.903e-101	0.5644	Cmya5
0.1364	65.67	49	3.18e-55	0.5614	Akna
0.1363	51.44	34.21	9.583e-88	0.5721	Gpr107
0.1363	57.08	39.19	1.413e-78	0.5704	Lysmd4
0.1362	41.47	26.07	8.27e-97	0.5702	Prkdc
0.1361	43.71	29.68	4.048e-72	0.5624	Nav1
0.136	57.43	39.71	1.355e-74	0.5687	Zfp871
0.1359	45.38	30.09	9.696e-82	0.567	Gpatch2
0.1357	46.07	29.55	1.812e-94	0.572	Nck1
0.1357	51.55	34.65	2.706e-83	0.5704	Stk24
0.1357	76.44	61.11	3.671e-32	0.548	Stx7
0.1356	52.66	35.96	7.796e-78	0.5686	Camsap1
0.1355	48.37	31.77	4.683e-90	0.5716	Ralgapb
0.1353	46.64	31.18	2.154e-79	0.5667	N4bp2l1
0.1353	54.86	41.31	4.354e-48	0.5551	Mthfs
0.1352	48.67	32.02	2.518e-88	0.5711	Dicer1
0.1349	44.99	28.59	6.128e-98	0.5727	Rps6kb1
0.1349	59.55	43.17	1.407e-59	0.5623	Ppcdc
0.1347	42.11	28.68	2.887e-68	0.56	Ctnnd2
0.1347	85.26	70.98	2.076e-20	0.5384	Pou2f2
0.1346	75.79	60.06	2.854e-34	0.5495	Hook3
0.1345	45.54	30.19	6.014e-82	0.5672	Zfp950
0.1343	37.11	21.19	8.852e-121	0.5742	Emsy
0.1343	68.78	51.49	2.08e-49	0.5585	Srrm1
0.1343	43.16	30.23	3.04e-62	0.558	Xrcc4
0.1342	77.05	62	1.338e-28	0.5452	Clint1
0.1341	58.5	41.82	1.79e-63	0.5639	Ylpm1
0.1339	55.77	39.15	6.139e-69	0.5657	Ino80d
0.1339	69.45	52.83	2.975e-43	0.5548	Kpna4
0.1337	47.19	32.24	5.214e-74	0.5648	Kif16b
0.1337	61.57	45.37	1.666e-55	0.5606	Top1
0.1337	67.34	50.87	1.926e-44	0.5553	Slc6a6
0.1334	49.17	32.61	1.079e-84	0.5699	Zfx
0.1334	53.98	36.96	1.378e-76	0.5685	Marchf7
0.1333	47.23	31.46	9.883e-83	0.5683	Fyco1
0.1333	46.98	32.31	6.927e-71	0.5634	Zfp697
0.1333	58.74	42.31	2.733e-61	0.5629	Golga4
0.1333	60.35	43.25	1.121e-58	0.5619	Gls
0.1331	72.94	57.61	6.435e-37	0.5511	Fkbp15
0.133	60.82	43.86	6.614e-62	0.5637	Oga
0.133	58.62	43.01	2.33e-54	0.5593	Fgd4
0.1329	41.04	27.43	7.617e-75	0.5622	Snx25
0.1329	68.03	51.88	1.532e-44	0.5555	Galnt1
0.1329	62.3	47.8	1.931e-44	0.5545	Spop
0.1328	49.93	33.74	2.335e-80	0.5685	Usp32
0.1328	72.17	55.5	5.36e-41	0.5537	Acin1
0.1326	51.43	36.98	2.675e-60	0.5604	Bbx
0.1326	79.88	65.41	2.104e-24	0.5419	Adgre1
0.1324	42.92	28.97	3.747e-72	0.562	Ugt1a6a
0.1322	50.68	33.35	1.949e-87	0.5715	Rab3gap2
0.1322	43.49	27.54	1.629e-95	0.5709	Vac14
0.1321	49.4	32.29	3.514e-90	0.572	Ppp4r3a
0.1321	37.55	22.85	3.286e-98	0.568	Ptpn4
0.1319	56.67	39.93	6.877e-66	0.5645	Cdk12
0.1318	32.14	17.73	5.705e-111	0.5669	Kcnk12
0.1316	70.13	55.73	2.626e-33	0.5482	Lrrc8d
0.1314	50.83	34.25	3.551e-82	0.5696	Gpbp1
0.1314	71.79	54.81	2.436e-40	0.5532	Pak2
0.1314	70.45	55.35	1.385e-35	0.5499	Tns1
0.1312	50.07	33.05	7.074e-85	0.5703	Ankrd10
0.1312	61.99	45.58	7.207e-54	0.5598	Tet2
0.1311	52.43	35.9	1.273e-75	0.5675	Sec24b
0.131	41.84	26.89	1.091e-89	0.5681	Eif2ak4
0.131	50.87	36.29	1.248e-61	0.5608	Srpk2
0.1309	44.23	28.58	7.252e-88	0.5686	Zfp236
0.1309	49.87	35.03	1.348e-64	0.5617	Dglucy
0.1308	39.18	24.5	2.657e-94	0.5679	Mad1l1
0.1308	78.57	62.58	1.307e-29	0.5461	Pik3cg
0.1306	44.85	29.4	2.169e-84	0.5677	Wdr20
0.1306	47.1	31.77	3.003e-79	0.5669	Rictor
0.1306	57.19	40.35	2.127e-64	0.5639	Sp3
0.1305	61.76	44.6	7.562e-59	0.5623	Capza1
0.1304	39.86	23.89	3.345e-106	0.572	Ric8b
0.1304	42.46	28.22	1.538e-76	0.5635	Nr6a1
0.1303	83.02	68.51	3.001e-21	0.5391	Ptp4a2
0.1301	44.87	28.66	1.802e-92	0.5706	Pank2
0.1301	48.44	32.91	8.965e-77	0.5665	Gpatch2l
0.13	81.58	67.68	1.654e-24	0.5421	Bmpr2
0.1298	52.89	36.52	1.703e-72	0.5663	Fip1l1
0.1297	49.24	32.56	8.133e-85	0.5699	Pkd1
0.1297	79.85	65.06	9.4e-28	0.5447	Ptpn1
0.1294	59.22	42.7	7.307e-60	0.5623	Phf3
0.1294	36.2	23.33	4.195e-75	0.5593	Tbc1d4
0.1294	59.81	44.52	8.64e-49	0.5565	Slc12a2
0.1293	39.39	23.88	1.894e-102	0.5705	Ern1
0.1293	52.28	36.35	2.162e-68	0.5643	Kcmf1
0.129	52.86	36.21	5.081e-75	0.5674	Vps35l
0.129	56.52	41.07	1.546e-57	0.5605	Elf4
0.1287	43.72	28.63	1.334e-83	0.5668	Tent4b
0.1287	75.65	59.65	4.327e-32	0.5478	Pafah1b1
0.1287	77.65	62.58	6.711e-26	0.543	Dpysl2
0.1286	41.76	26.84	3.952e-87	0.567	Ppfibp2
0.1286	49.97	34.05	2.199e-74	0.566	Itfg1
0.1286	37.86	24.89	2.104e-73	0.5597	Slc39a11
0.1286	54.89	40.23	2.651e-54	0.5584	Creb3l2
0.1285	51.41	35.8	3.698e-69	0.5644	Smad1
0.1285	51.48	41.73	4.354e-29	0.5424	Cacna1a
0.1285	66.19	54.16	2.723e-23	0.5399	Arhgap24
0.1284	49.1	32.08	3.135e-86	0.5703	Phf12
0.1284	45.56	29.48	6.708e-90	0.5701	Ppp3cb
0.1284	67.07	51.12	2.838e-40	0.5526	Susd6
0.1283	46.94	30.8	1.132e-87	0.57	Ireb2
0.1281	37.11	22.87	3.003e-92	0.5657	Phtf2
0.1279	39.53	23.78	9.025e-106	0.5717	Cramp1
0.1279	52.31	37.76	1.084e-56	0.5588	Pcdhgb2
0.1279	62.89	46.98	2.898e-47	0.5562	Tmem104
0.1278	47.37	31.75	1.534e-79	0.5671	Slc30a7
0.1278	67.32	50.37	5.231e-45	0.5555	Ccni
0.1278	96.89	89.42	6.674e-15	0.5328	Cyfip1
0.1277	46.86	30.52	4.601e-86	0.5692	Stxbp3
0.1277	56.89	40.22	9.665e-65	0.564	Luc7l3
0.1277	53.5	38.22	1.353e-61	0.5616	Prkacb
0.1277	60.62	45.5	1.715e-48	0.5566	Raly
0.1276	56.62	40.1	4.997e-65	0.5641	Tmem63a
0.1276	60.01	44.1	1.731e-55	0.5603	Gpr155
0.1275	53.36	36.53	6.247e-74	0.5671	Dcaf8
0.1274	45.21	29.1	2.487e-90	0.57	Nnt - ENSMUSG00000025453
0.1274	47.37	31.21	3.876e-84	0.5688	Npepps
0.1274	48.86	33.06	1.035e-74	0.5657	Cdc42se2
0.1274	55.74	39.27	5.661e-65	0.5638	Prkd3
0.1273	47.02	30.35	1.953e-87	0.5697	Pdpk1
0.1271	47.86	31.97	1.871e-79	0.5672	Pspc1
0.1271	69.13	53.06	1.504e-39	0.5524	Gna13
0.1271	91.48	79.72	3.087e-14	0.532	Ptgs1
0.1269	36.46	21.42	5.738e-108	0.5701	Eya3
0.1269	64.95	47.74	1.885e-51	0.559	Thrap3
0.1269	84.45	70.15	8.341e-19	0.5368	Prrc2c
0.1268	49.25	33.19	7.415e-78	0.5672	Pik3c2a
0.1267	42	26.34	1.014e-94	0.5697	Ttc13
0.1267	46.52	32.71	2.233e-62	0.5595	Clcn5
0.1266	47.48	32.04	2.242e-76	0.5658	Ppm1b
0.1266	37.81	25.28	6.335e-67	0.5572	Magi3
0.1265	50.64	34.53	1.205e-74	0.5664	Cyld
0.1265	45.25	31.82	1.691e-61	0.5586	Taf3
0.1264	34.97	20.75	2.045e-99	0.5663	Fam135a
0.1264	58.15	41.74	9.803e-60	0.5619	Mapk1
0.1264	70.98	54.04	7.252e-42	0.5541	Tm9sf2
0.1263	47	31.49	3.882e-79	0.5667	Map3k7
0.1262	45.17	28.86	3.62e-90	0.5698	Foxk2
0.1261	56.4	39.13	8.806e-69	0.5657	Uggt1
0.126	39.03	23.23	3.222e-107	0.5717	Snapc3
0.1259	45.79	30.96	1.251e-73	0.5639	Nsf
0.1259	70.26	53.61	1.356e-39	0.5525	Hnrnpm
0.1257	46.44	30.07	1.958e-86	0.5691	Riok3
0.1257	42.85	28.02	2.792e-81	0.5655	Lrrfip2
0.1255	68.34	51.96	3.104e-40	0.5527	Hps4
0.1254	40.74	25.32	6.727e-93	0.5682	Pot1b
0.1252	38.08	25.15	8.114e-73	0.5597	Nt5dc1
0.125	57.76	41.24	3.877e-59	0.5615	Dram2
0.1248	52.87	36.4	3.649e-72	0.5661	Marchf6
0.1247	39.12	25.42	3.211e-78	0.5622	Nova1
0.1246	53.2	36.13	2.22e-74	0.5671	Usp7
0.1245	39.51	24.16	3.589e-97	0.5689	Lrig2
0.1245	49.07	33.07	1.298e-75	0.5661	Ppp2r2a
0.1245	47.44	33.02	5.206e-66	0.5614	Dtnbp1
0.1245	56.77	42.37	1.299e-48	0.5558	Klf7
0.1245	62.27	46.93	4.716e-44	0.5542	Elf2
0.1242	45.02	30.02	3.971e-75	0.5641	Tango2
0.1241	41.5	27.72	7.945e-72	0.5611	Foxo1
0.1241	61.03	44.48	1.946e-54	0.5598	Mef2d
0.1241	49.63	36.1	8.493e-54	0.5565	Add3
0.1241	70.05	53.42	1.138e-39	0.5525	Nisch
0.124	63.41	47.19	3.477e-47	0.5562	Map3k1
0.1237	68.3	52.84	3.759e-37	0.5507	Nek6
0.1236	56.82	40.57	6.486e-60	0.5616	Prpf40a
0.1235	42.39	27.96	1.057e-75	0.563	Lrp12
0.1235	47.9	32.89	6.043e-69	0.5628	Ahdc1
0.1235	45.35	31.77	6.23e-64	0.5597	Otud7b
0.1234	44.98	30.45	1.107e-70	0.5623	Wwc2
0.1233	38.93	25.15	3.161e-80	0.5629	Med27
0.1233	49.45	34.47	7.176e-67	0.5626	Snx9
0.1231	54.48	37.83	2.014e-67	0.5645	Cep68
0.123	82.04	67.45	2.56e-22	0.5401	Rps6ka1
0.1229	56.38	41.34	8.186e-51	0.5568	Abl2
0.1227	60.18	44.13	9.893e-52	0.5582	Usp25
0.1226	37.15	23.95	3.11e-75	0.5599	Tiam1
0.1222	55.9	40.01	1.143e-58	0.5608	Wbp1l
0.1222	70.75	54.47	1.657e-33	0.5483	Myo9b
0.122	44.03	28.52	4.427e-84	0.567	Pikfyve
0.122	39.66	25.24	1.176e-85	0.5652	Ube2q2
0.1218	42.31	26.67	1.181e-89	0.568	Sos2
0.1218	41.81	27.06	2.363e-81	0.5648	Hycc1
0.1218	58.35	41.6	2.941e-58	0.5611	Hnrnpd
0.1217	41.22	29.24	6.039e-56	0.5543	Commd10
0.1217	70.07	55.58	1.314e-29	0.5454	Lrrfip1
0.1216	52.55	36.43	1.16e-66	0.5635	Chd1
0.1216	72.18	56.76	3.097e-32	0.5476	Gnb1
0.1215	46.09	30.44	8.054e-79	0.566	Lpxn
0.1214	45.52	31.51	1.479e-64	0.56	Tbc1d8
0.1214	59.62	44.05	4.517e-49	0.5566	Frrs1
0.1214	73.36	58.89	8.736e-31	0.5467	F11r
0.1213	41.6	25.86	3.499e-95	0.5696	Zfp592
0.1213	53.98	37.52	3.099e-66	0.5638	Zfp90
0.1213	37.11	23.82	1.465e-76	0.5603	Crim1
0.121	44.73	29	2.939e-84	0.5675	Avl9
0.121	99.22	94.95	1.058e-13	0.5314	Siglech
0.1208	32.21	18.43	9.823e-102	0.5646	Ypel2
0.1206	41.24	26.27	1.922e-86	0.5664	Shprh
0.1204	72.85	59.13	5.967e-26	0.5427	Hpgd
0.1203	53.9	38.58	7.87e-58	0.5598	Mga
0.1203	24.84	15.1	8.907e-67	0.5478	Ppm1e
0.1202	57.7	41.7	4.933e-55	0.5593	Cabin1
0.1202	56.25	42.4	1.653e-42	0.552	Epsti1
0.1202	76.66	61.18	3.198e-25	0.5423	Usp8
0.1199	31.02	18.94	4.21e-82	0.5579	Rras2
0.1199	32.86	21.03	2.354e-70	0.5553	Ikzf2
0.1199	37.58	25.63	1.421e-60	0.5544	Rabgap1l
0.1199	87.07	74.69	2.01e-11	0.5284	Wipf1
0.1197	47.6	32.29	6.216e-70	0.5631	Itpk1
0.1197	49.22	34.52	1.244e-62	0.5605	Inpp4a
0.1196	50.26	34.98	7.063e-66	0.5624	Efr3a
0.1194	38.15	23.05	2.096e-97	0.568	Cep152
0.1192	44.62	28.39	1.342e-88	0.5689	Brf1
0.1192	47.11	31.13	2.684e-79	0.5667	Rhot1
0.1192	42.95	29.97	2.72e-61	0.5575	Dock9
0.1191	41.7	27.31	1.343e-76	0.563	Pex14
0.1191	39.39	25.69	2.374e-76	0.5617	Abcg2
0.119	77.5	62.19	1.318e-23	0.541	Prkcd
0.1189	34.08	19.81	8.653e-103	0.5665	Dop1a
0.1189	34.6	20.87	1.19e-93	0.5643	Hira
0.1189	41.34	26.96	3.67e-78	0.5634	Cbfa2t2
0.1189	45.8	31.37	4.815e-67	0.5611	Tmem65
0.1189	61.61	46.14	1.194e-46	0.5556	Prdm2
0.1188	66.19	50.32	5.67e-41	0.5529	Rp2
0.1188	80.16	65.3	5.157e-20	0.5378	Sema4d
0.1187	42.87	27.44	2.852e-86	0.5672	Chic2
0.1186	40.87	25.81	5.454e-88	0.5667	Mtor
0.1186	47.72	32.22	7.647e-71	0.5635	Sos1
0.1185	38.8	25.98	1.309e-68	0.5584	Vwa8
0.1184	53.73	37.59	4.089e-63	0.5622	Fubp1
0.1184	54.12	38.69	5.286e-59	0.5604	Top2b
0.1184	53.44	37.95	6.003e-58	0.5596	Tasor2
0.1181	58.38	41.96	9.655e-54	0.5587	Larp1
0.118	36.65	22.83	3.752e-85	0.563	R3hcc1l
0.118	57.74	41.86	8.517e-54	0.5587	Scamp1
0.1179	38.44	23.99	1.89e-88	0.5653	Parn
0.1179	56.89	41.49	8.603e-53	0.558	Ostf1
0.1178	43.54	30.43	3.5e-59	0.5567	Spata5
0.1177	38.05	24.09	9.976e-83	0.5631	Rfx7
0.1177	34.73	24.65	5.814e-47	0.5469	Gmds
0.1176	45.98	31.83	2.404e-64	0.56	Tmem87b
0.1175	39.68	24.24	2.293e-96	0.5687	Orc4
0.1175	46.87	31.11	1.401e-76	0.5655	Usp33
0.1174	49.26	33.67	9.784e-71	0.5641	Cdc42bpb
0.1173	43.3	27.71	1.579e-86	0.5675	Anapc1
0.1169	67.72	51.64	8.019e-37	0.5503	Wapl
0.1168	60.84	44.63	1.681e-49	0.557	Ep400
0.1167	37.32	22.54	4.678e-96	0.567	Usp40
0.1166	54.87	40.41	1.378e-50	0.5563	Nfix
0.1165	43.73	28.42	9.045e-81	0.5656	Cdc37l1
0.1165	50.06	33.96	1.232e-71	0.5648	Fxr1
0.1165	43.62	28.75	1.655e-77	0.5644	Atf2
0.1165	53.27	37.22	3.892e-63	0.5621	Supt20
0.1163	44.5	29.82	6.886e-74	0.5634	Cr1l
0.1161	47.64	32.78	2.663e-67	0.562	Lactb2
0.1161	37.71	24.34	1.363e-76	0.5607	Tmem260
0.1161	87.87	75.29	8.715e-14	0.5314	Gdi2
0.116	39.28	25.74	3.204e-73	0.5604	Gatb
0.1159	31.94	21.02	6.587e-60	0.5507	Scfd2
0.1158	40.99	26.22	9.411e-84	0.5652	Spast
0.1157	51.43	35.89	1.979e-63	0.5616	Naa35
0.1157	46.71	31.85	1.768e-66	0.5612	Abcb7
0.1155	32.82	20.77	1.212e-72	0.556	Cnnm2
0.1154	35.73	22.35	6.333e-83	0.5616	Cdc14a
0.1153	47.09	31.52	1.35e-72	0.5639	Ccnt2
0.1153	54.09	38.31	1.573e-59	0.5606	Marf1
0.1152	37.92	23.03	3.799e-95	0.5671	Zfyve1
0.1152	45.06	30.3	1.12e-69	0.5618	Ube2w
0.1151	39.69	25.51	2.531e-80	0.5632	Nhlrc2
0.1151	44.68	30.12	1.159e-71	0.5626	Parg
0.115	53.77	37.52	8.6e-62	0.5615	Safb2
0.115	56.28	40.52	3.53e-54	0.5585	Arhgap4
0.115	36.46	24.12	1.799e-67	0.5566	Ralgapa2
0.115	62.29	49.32	4.472e-29	0.5441	Fmnl2
0.1149	58.72	43.87	4.077e-46	0.5547	Etv5
0.1146	38.9	24.08	8.861e-90	0.566	Malt1
0.1145	48.8	33.39	1.504e-68	0.563	Ikbkb
0.1145	45.91	33.15	1.349e-50	0.5535	Arsg
0.1144	50.55	36.2	7.213e-58	0.5588	Ubn1
0.1143	55.7	39.52	1.782e-58	0.5605	Chd8
0.1143	41.89	29.16	1.954e-57	0.5551	Utrn
0.1142	40.2	26.05	9.018e-77	0.5622	Hdac4
0.1141	45.67	30.76	2.11e-71	0.5629	Cdc73
0.1141	39.3	25.75	2.593e-74	0.5608	Wrn
0.114	41.54	26.25	2.802e-86	0.5664	Ccz1
0.114	49.97	33.9	8.031e-70	0.5639	Fnbp4
0.114	34.82	21.38	8.703e-86	0.5619	Gtf2f2
0.114	55.23	39.81	1.288e-54	0.5585	Snx2
0.114	56.48	41.19	7.81e-51	0.5568	Eps15
0.1139	46.52	32.05	1.714e-65	0.5607	Rcor1
0.1139	48.19	34.66	4.039e-54	0.5561	Cyth3
0.1139	30.47	18.86	1.63e-73	0.5546	Mcph1
0.1138	44.94	30.03	6.337e-71	0.5623	Slc49a4
0.1138	36.75	23.81	2.988e-72	0.5585	Vps13a
0.1138	39.78	27.52	1.831e-57	0.5542	Cwc27
0.1137	39.15	24.19	1.55e-90	0.5664	Agfg1
0.1137	39.82	25.29	9.751e-82	0.5637	Rab39
0.1137	48.92	33.72	2.132e-66	0.5621	Qrich1
0.1137	72.71	56.92	7.735e-30	0.5458	Fermt3
0.1136	39.26	24.26	9.816e-89	0.5658	Txndc11
0.1136	40.47	25.61	6.679e-86	0.5657	Tcerg1
0.1135	45.06	30.49	2.545e-69	0.5617	B4galt6
0.1135	77.25	62.35	5.678e-22	0.5395	Nfam1
0.1134	60.47	45.28	8.671e-43	0.553	Prcp
0.1133	40.5	25.85	2.938e-83	0.5648	Tbc1d2b
0.1133	66.37	50.43	6.721e-37	0.5501	Tut7
0.113	38.81	24.45	2.492e-84	0.5641	Krit1
0.113	43.04	28.31	3.513e-76	0.5635	C2cd3
0.113	43.96	29.3	4.234e-69	0.561	Lyzl4
0.1129	35.48	22.18	8.472e-82	0.5611	Nsd2
0.1129	36.17	24.3	3.888e-62	0.5543	Sergef
0.1128	50.8	35.03	3.819e-64	0.5616	Kdm5a
0.1128	35.78	22.85	2.068e-75	0.559	Tdrd3
0.1127	55.15	39.36	1.217e-55	0.5589	Scamp5
0.1127	38.49	25.44	4.324e-70	0.5587	Tom1l2
0.1126	40.14	25.65	5.045e-82	0.5641	Smarcad1
0.1125	37.03	22.99	9.912e-86	0.5634	Rab40c
0.1125	48.8	33.14	9.869e-69	0.563	Gfm2
0.1125	41.03	26.73	6.295e-77	0.5627	Uimc1
0.1124	33.68	20.01	1.913e-94	0.5638	Wdr11
0.1123	43.19	28.47	1.235e-74	0.5629	Snx27
0.1123	39.58	25.87	4.323e-73	0.5604	Urgcp
0.1123	63.5	47.63	3.498e-41	0.5525	Ube2d3
0.1122	35.66	22.18	4.629e-83	0.5616	Nfyc
0.1122	63.77	48.26	7.922e-40	0.5517	Ubap2l
0.1121	39.13	24.12	5.77e-90	0.5661	Fbxl5
0.1119	48.68	32.97	9.33e-69	0.5629	Rabl6
0.1116	49.98	33.93	6.992e-68	0.563	Arhgap27
0.1114	40.42	25.87	1.394e-80	0.5637	Upf2
0.1113	43.66	29.2	1.723e-70	0.5615	Strn
0.1113	66.46	50.43	1.13e-36	0.55	Comt
0.1111	58.24	42.4	2.212e-50	0.5569	Snx6
0.111	61.8	46.63	2.565e-39	0.551	Ddi2
0.1109	46.04	30.67	5.218e-71	0.5627	4632427E13Rik
0.1107	43.69	28.99	3.98e-74	0.563	Mcmbp
0.1107	36.39	23.02	7.734e-79	0.5606	Ube2e3
0.1106	39.49	24.99	1.215e-83	0.5642	Wasl
0.1105	58.43	42.79	1.073e-48	0.556	Kif5b
0.1103	46.91	32.09	6.625e-66	0.561	Ttc14
0.1102	36.02	22.39	4.431e-81	0.561	Cbfa2t3
0.1102	45.64	31.05	7.529e-67	0.5609	Kdm3a
0.1102	42.64	28.82	1.148e-67	0.5599	Srsf4
0.1102	40.58	28.03	8.383e-59	0.5552	Slx4ip
0.1102	56.17	41.08	4.405e-48	0.5551	Pacs2
0.1102	74.77	59.44	1.626e-23	0.5407	Adam17
0.1101	39.46	25.34	3.52e-78	0.5623	Armc8
0.1101	49.38	33.77	1.198e-65	0.5618	Lpcat1
0.1099	43.71	31.93	7.318e-45	0.5497	Aig1
0.1098	32.59	19.14	3.454e-94	0.5628	Ddx31
0.1098	37.78	23.97	2.061e-80	0.5621	Cdc27
0.1098	40.41	26.87	1.313e-68	0.5591	Cstf3
0.1098	47.37	33.11	2.741e-60	0.5587	Pi4ka
0.1098	68.41	52.19	2.846e-33	0.5478	Ewsr1
0.1097	57.54	41.83	2.828e-50	0.5567	Macroh2a1
0.1093	42.38	28.91	3.804e-63	0.5578	Arhgap35
0.1092	52.44	37.06	1.475e-57	0.5591	Nup98
0.1091	44.77	29.9	7.506e-71	0.5621	Zfp451
0.1091	51.55	36.13	2.559e-57	0.5586	Stx16
0.109	42.2	27.72	1.512e-74	0.5624	Med15
0.109	40.85	27.99	9.864e-63	0.557	Osbpl1a
0.1088	41.8	27.81	9.89e-71	0.5607	Cep192
0.1088	40.76	27.53	1.336e-64	0.5577	Crybg3
0.1087	36.92	23.03	3.731e-83	0.5624	Oxsr1
0.1087	37.86	24.06	4.537e-79	0.5616	Ppp6r2
0.1087	43	28.6	2.85e-70	0.5611	Fam114a2
0.1087	48.67	33.67	8.937e-61	0.5593	AU040320
0.1087	68.82	54.31	4.438e-30	0.5456	Tnfrsf1b
0.1086	46.72	31.63	1.785e-67	0.5616	Ip6k1
0.1086	56.24	40.97	5.984e-49	0.5556	Il21r
0.1085	39.73	25.83	3.416e-75	0.5613	Maml1
0.1085	48.87	33.88	9.412e-63	0.5604	N4bp1
0.1085	35.58	22.58	1.155e-75	0.5589	Fam222b
0.1085	24.41	16.11	2.209e-46	0.5402	Atg4a
0.1084	48.38	34.68	1.327e-52	0.5553	Rala
0.1084	58.72	45.66	7.96e-34	0.5469	Bcor
0.1083	31.74	19.23	1.803e-81	0.5581	Atp10d
0.1082	41.65	27.35	6.469e-73	0.5614	Mysm1
0.1081	51.55	37.15	1.415e-51	0.5558	Cbfb
0.1081	55.59	40.76	4.926e-47	0.5544	Mideas
0.108	38.07	23.87	5.331e-84	0.5635	Tia1
0.108	52.05	37.42	3.435e-52	0.5563	Plgrkt
0.108	51.37	37.57	4.599e-47	0.5533	Sgce
0.1079	89.11	76.52	1.67e-09	0.5257	Sall1
0.1078	51.29	35.54	3.222e-61	0.5604	Susd3
0.1078	37.77	25.03	3.905e-67	0.5571	Man2a1
0.1077	46.9	32.15	3.667e-64	0.5602	Smarcc1
0.1075	45.91	30.62	3.627e-71	0.5627	Iffo1
0.1075	40.85	26.87	1.445e-73	0.5613	Pik3r6
0.1075	55.59	40.95	6.168e-46	0.5538	Rc3h1
0.1075	50.09	36.8	5.057e-48	0.5536	Eea1
0.1074	46.73	32.24	2.803e-62	0.5593	Synrg
0.1074	55.59	42.04	6.843e-39	0.5496	Arid5b
0.1073	39.5	25.87	9.98e-72	0.5598	Bmt2
0.1072	30.02	16.84	1.913e-100	0.5622	Phlpp2
0.107	42.29	27.32	2.281e-77	0.5634	Foxj3
0.107	33.83	21.6	2.308e-71	0.5563	Mast2
0.107	38.67	26.18	6.065e-62	0.5555	Gm26510
0.107	78.26	63.57	5.031e-20	0.5377	Rab3il1
0.1069	40.03	25.93	7.689e-77	0.5621	Ppip5k2
0.1069	49.33	35.34	5.244e-53	0.5559	Mxi1
0.1068	37.07	23.86	7.68e-75	0.5596	Arfip1
0.1068	37.12	25.92	1.225e-51	0.5502	Elp4
0.1067	35.84	22.4	2.021e-78	0.56	Gm6277
0.1067	45.96	31.44	5.687e-64	0.5597	Gpcpd1
0.1067	53.82	38.65	2.814e-52	0.5568	Gpbp1l1
0.1066	40.49	26.48	1.535e-73	0.5611	Arih2
0.1066	41.14	27.52	1.127e-66	0.5587	Bmpr1a
0.1066	57.36	44.92	1.33e-31	0.5451	2510009E07Rik
0.1066	97.59	91.67	3.053e-09	0.5254	Cfh
0.1065	58.07	42.07	4.217e-47	0.5549	Baz1b
0.1065	29.26	20.4	1.588e-42	0.5418	Camkmt
0.1065	84.14	70.47	1.152e-10	0.5273	Havcr2
0.1064	22.65	12.74	6.684e-75	0.5479	Adcy8
0.1063	40.01	25.64	2.569e-77	0.5622	Setdb1
0.1063	52.68	38.3	1.653e-49	0.555	Ogdh
0.1062	57.62	42.81	4.31e-43	0.5526	Tle3
0.1061	38.62	24.74	1.799e-76	0.5611	Scfd1
0.1061	39.19	26.06	5.889e-67	0.5578	Ndufs4
0.106	43.46	28.96	3.314e-68	0.5604	Appbp2
0.1059	55.32	39.73	1.166e-51	0.5568	Snn
0.1059	66.79	50.96	8e-32	0.5466	Sec14l1
0.1058	43.45	29.35	9.003e-67	0.5599	D5Ertd579e
0.1056	37.97	24.2	5.596e-77	0.5609	Dpy19l1
0.1056	66.95	50.92	5.965e-34	0.5481	Gmip
0.1053	47.82	33.79	6.998e-55	0.5562	Smg7
0.1053	55.54	42.07	9.014e-39	0.5495	Ppard
0.1052	50.17	35.86	5.291e-52	0.5556	Pigk
0.1051	37.34	23.94	2.163e-75	0.56	Med14
0.105	35.02	21.16	8.308e-89	0.5629	Cdc40
0.105	42.5	27.56	2.119e-75	0.5627	Fam76b
0.105	38.12	24.38	1.402e-74	0.56	Ide
0.1049	47.63	33.17	2.378e-60	0.5588	Tial1
0.1049	30.45	18.02	2.455e-85	0.5583	Hace1
0.1047	45.6	30.76	1.509e-67	0.5611	Sh3bp1
0.1047	44.81	30.8	1.228e-60	0.5577	Grk3
0.1047	45.11	31.25	6.912e-60	0.5576	Atg5
0.1047	55.24	39.76	2.234e-49	0.5555	Ythdc1
0.1046	42.03	28.35	7.639e-64	0.5579	Abhd17c
0.1046	41.16	27.7	5.433e-64	0.5575	Afap1l1
0.1044	54.79	39.66	3.208e-48	0.5548	N4bp2l2
0.1042	30.21	16.69	2.169e-104	0.5634	Zc3h3
0.1042	46.86	33.11	8.316e-56	0.5564	Cacul1
0.1042	54.24	39.24	6.148e-49	0.5551	Mtmr6
0.1042	55.58	41.41	2.175e-40	0.5505	Abcg1
0.1042	27.32	17.19	2.531e-62	0.5483	Aven
0.1042	31.9	21.69	2.074e-52	0.5477	2210408F21Rik
0.1042	66.61	50.65	6.708e-33	0.5473	Atp6v0a2
0.1041	48.19	33.9	4.412e-56	0.5569	Gm44860
0.1041	40.45	27.47	3.183e-60	0.5556	Psmd14
0.1041	39.26	28.27	1.201e-46	0.5489	Phlpp1
0.104	62.7	47.52	3.979e-36	0.5491	Aff4
0.1039	37.61	25.15	3.048e-62	0.555	Rap1gap2
0.1039	65.17	50.7	6.665e-30	0.545	Glg1
0.1038	34.74	21.46	5.959e-82	0.5605	Usp37
0.1038	31.64	18.71	4.009e-88	0.5601	Mapk8
0.1038	31.28	18.62	1.571e-84	0.5587	Fbxl4
0.1038	55.21	41.29	6.223e-40	0.5501	Trpm2
0.1037	31.41	19.26	4.318e-77	0.5564	Focad
0.1037	56.05	41.16	6.453e-44	0.5527	Dnajc5
0.1037	59.31	44.62	1.533e-40	0.5514	Vapa
0.1037	61.77	46.8	8.503e-36	0.5487	Atp2a2
0.1036	31.35	18.43	8.099e-88	0.5597	Dnmbp
0.1036	33.66	20.6	7.812e-81	0.5593	Lncppara
0.1036	84.19	71.46	5.074e-09	0.5249	Cd86
0.1035	33.08	20.35	5.66e-78	0.5579	Prdm11
0.1035	57.27	42.55	2.53e-40	0.5508	Bod1l
0.1035	25.42	15.66	9.699e-64	0.5472	Tpk1
0.1034	38.74	25.51	8.31e-68	0.5578	Cdk17
0.1034	29.44	17.62	6.429e-81	0.5561	Klhl2
0.1034	46	33.45	4.363e-46	0.5511	Ston2
0.1033	42.97	28.78	2.704e-67	0.5598	Zcchc2
0.1032	46	31.22	7.019e-65	0.5601	Kdm5c
0.1032	40.8	27.04	1.171e-68	0.5593	Rnf145
0.1032	43.34	30.22	3.597e-56	0.5551	Micu1
0.1032	38.92	26.48	5.506e-60	0.5548	Cspp1
0.1032	64.12	48.17	1.914e-36	0.5494	Grk2
0.1031	46.54	32.47	3.149e-56	0.5564	Map3k14
0.1031	50.2	35.92	3.528e-53	0.5562	Hsd17b4
0.1031	37.13	25.12	7.24e-58	0.5529	Prkag2
0.1031	61.19	45.57	2.983e-39	0.5508	Matr3
0.1031	59.18	44.15	1.64e-39	0.5506	Dlgap4
0.103	33.54	20.48	7.353e-82	0.5596	Rspry1
0.103	38.85	25.23	4.203e-71	0.5591	Shoc2
0.103	37.31	24.04	8.427e-73	0.5589	Esco1
0.1028	30.28	19.05	5.601e-70	0.5533	Dcaf6
0.1027	33.04	21.39	9.995e-66	0.5537	Cdc42bpa
0.1027	76.63	61.8	1.081e-17	0.5352	Daglb
0.1026	33.71	21.06	5.289e-75	0.5574	Shb
0.1026	31.12	21.1	1.723e-51	0.5468	Mcu
0.1025	30.45	18.06	4.607e-84	0.5579	Rasa2
0.1025	32.85	20.39	6.628e-76	0.5571	Ugt1a8
0.1025	31.28	19.15	1.705e-77	0.5565	Scai
0.1025	79.19	65.15	4.311e-16	0.5337	Cd164
0.1024	46.82	32.14	1.353e-61	0.559	Tardbp
0.1024	50.64	38.51	7.996e-38	0.5478	Tnfaip8
0.1024	50.43	38.27	1.627e-37	0.5476	Eya4
0.1023	32.85	19.13	1.542e-94	0.5629	4833420G17Rik
0.1021	44.34	29.55	4.607e-69	0.5611	Ptpa
0.1021	54.78	39.38	9.092e-50	0.5556	Rbbp6
0.1021	63.49	48.1	3.769e-35	0.5485	Itprid2
0.102	41.57	27.31	2.172e-71	0.5607	Tnpo3
0.102	34.85	21.85	1.289e-76	0.5587	Zranb1
0.102	45.41	31.11	4.737e-61	0.5581	Rprd2
0.1019	36.24	23.1	1.216e-73	0.5586	Asap3
0.1019	40.05	27.39	1.179e-58	0.5547	Galk2
0.1018	43.41	28.73	4.888e-70	0.5611	Nup214
0.1018	38.11	24.99	1.216e-67	0.5574	Ldah
0.1018	37.24	24.8	1.501e-63	0.5553	Desi2
0.1018	29.97	19.24	3.845e-62	0.5502	Xkr6
0.1017	49.29	34.98	7.784e-53	0.5557	Heca
0.1016	50.74	36.02	2.31e-54	0.5569	Dennd1c
0.1015	32.37	20.08	2.179e-77	0.5573	Sufu
0.1015	50.37	36.22	1.134e-49	0.5544	Klhl24
0.1015	76.01	61.39	3.592e-19	0.5367	Snx18
0.1014	45.52	31.52	3.5e-59	0.5574	Pphln1
0.1013	35.81	25	5.131e-51	0.5493	Sil1
0.1012	35.71	22.27	5.876e-79	0.5601	Mta3
0.1011	31.53	18.18	1.011e-92	0.5612	Xpo4
0.1011	35.51	22.59	1.239e-73	0.5581	Agap3
0.1011	49.43	36.11	7.073e-46	0.5521	Tmem243
0.1011	36.04	24.69	4.692e-55	0.5512	Hibadh
0.1008	39.68	26.34	8.009e-67	0.558	Suco
0.1008	41.7	29.04	1.851e-54	0.5536	Ctif
0.1006	30.78	18.66	6.72e-78	0.5562	Msantd2
0.1006	54.67	39.48	1.758e-48	0.5549	Ythdf2
0.1006	46.63	33.31	8.147e-49	0.5527	3110082I17Rik
0.1005	29.33	17.16	4.408e-83	0.5565	Klhl3
0.1005	43.73	30.3	3.498e-57	0.5557	Manba
0.1005	28.17	17.35	1.065e-67	0.5507	Lin52
0.1004	51.93	37.11	1.241e-50	0.5553	Zfp445
0.1003	30.79	19.2	2.079e-71	0.5541	1700110C19Rik
0.1003	63.27	48.28	1.556e-32	0.5466	Arl8b
0.1002	35.35	22.43	3.455e-73	0.5578	Swt1
0.1002	50.09	35.82	2.842e-50	0.5546	Plekha2
0.1	29.55	19.27	1.616e-57	0.5482	Znrf3
0.09993	33.56	21.39	7.483e-69	0.5551	Rab28
0.09981	93.27	84.78	4.324e-08	0.5237	Maf
0.09973	38.81	25.71	7.439e-65	0.5567	Asb3
0.09968	38.62	24.75	4.489e-75	0.5605	Ubp1
0.09963	45.92	32.11	1.753e-55	0.5558	Camkk2
0.09953	61.93	47.25	7.532e-33	0.5466	Wls
0.09952	33.28	19.68	4.215e-89	0.5616	Ints8
0.0995	39.68	25.78	4.186e-71	0.5596	Sap130
0.0995	33.44	20.63	4.664e-81	0.5593	Mms19
0.09946	54.1	39.43	2.133e-45	0.553	Glyr1
0.0994	38.19	24.41	8.318e-74	0.5597	Pogz
0.09939	64.64	49.71	2.065e-31	0.546	Vwa5a
0.09934	41.18	27.27	4.78e-67	0.5588	Ubxn7
0.09934	44.08	31.78	4.757e-46	0.5504	Fam219a
0.09931	29.59	17.22	1.052e-85	0.5576	Fam118b
0.09929	45.95	31.61	9.16e-60	0.5578	Ipo9
0.09925	44.04	30.18	1.939e-58	0.5563	Cyp4f13
0.0991	34.02	23.62	1.18e-47	0.5467	Zc3h12b
0.09901	44.45	30.67	2.064e-58	0.5566	Wwp2
0.099	34.77	21.52	7.394e-79	0.5594	Eif2ak3
0.09899	40.26	27.59	6.551e-58	0.5545	Col15a1
0.09891	34.66	22.4	1.944e-68	0.5557	Vta1
0.0988	57.54	44.95	1.947e-30	0.5443	Scoc
0.09877	53.31	40.62	3.393e-37	0.5481	Lpgat1
0.09875	41.8	26.9	1.459e-74	0.562	Xpot
0.09873	49.36	34.85	1.962e-53	0.556	Naa15
0.09871	54.86	39.66	5.012e-46	0.5535	Trrap
0.0986	30.06	17.89	1.737e-81	0.5567	Auh
0.09858	54.47	40.22	1.369e-43	0.5521	Sbno1
0.09853	39.13	25.92	1.959e-65	0.5571	Gmeb1
0.09843	34.6	21.59	2.026e-76	0.5584	Dennd4c
0.09843	50.68	36.21	1.232e-51	0.5555	U2surp
0.09835	43.76	29.69	1.558e-62	0.5581	Usp4
0.09832	35.71	22.71	2.765e-73	0.5581	Mtf2
0.09823	36.75	24.19	1.466e-65	0.5558	8030462N17Rik
0.09821	46.48	32.87	5.319e-51	0.5537	Mecp2
0.09818	45.38	31.56	9.584e-57	0.5562	Slain2
0.09813	34.97	22.23	2.25e-72	0.5573	Tbc1d31
0.09807	49.75	34.67	3.068e-57	0.558	Gm20605
0.09804	61.18	45.96	1.798e-35	0.5483	Ubr4
0.09797	43.49	31.37	3.436e-46	0.5503	Stim1
0.09794	32.17	19.97	2.028e-73	0.5557	Mob2
0.09785	43.5	29.82	1.47e-59	0.5567	Mtmr2
0.09782	27.4	15.83	2.039e-82	0.5547	Arhgap32
0.09773	41.81	28.69	9.352e-59	0.5556	Rmnd5a
0.09772	31.39	18.92	2.03e-81	0.5578	Sec24a
0.09771	67.86	53.35	2.922e-25	0.5416	Npc1
0.0977	50.62	36.33	5.326e-50	0.5546	Yme1l1
0.09764	58.49	42.97	1.011e-40	0.5512	Prrc2b
0.09764	50.45	37.43	5.563e-42	0.5502	Snx10
0.09764	72.52	57.48	1.236e-21	0.5388	Slc2a5
0.09761	36.65	23.64	1.005e-69	0.5573	Zfp654
0.09761	63.49	48.24	2.783e-33	0.5472	Arhgef2
0.09753	38.9	25.17	3.699e-71	0.5592	Spg11
0.09746	42.69	28.68	2.154e-64	0.5584	Ice1
0.09746	42.72	29.79	1.441e-53	0.5536	B3galt5
0.09739	38.08	26.72	9e-51	0.5503	Spidr
0.09727	34.39	22.69	6.19e-61	0.5526	Mnat1
0.09726	32.6	19.29	3.156e-86	0.5601	Gm3739
0.09722	55.08	41.18	3.421e-40	0.5502	Sptlc2
0.0972	35.71	24.72	9.212e-52	0.5495	Tspan9
0.09718	91.16	83.12	7.744e-06	0.5197	Fcrls
0.09705	38.84	26.05	3.345e-61	0.5552	Mbtps2
0.09701	38.39	24.83	3.502e-71	0.5589	Chm
0.09693	39.45	27.31	3.399e-54	0.5525	Esyt2
0.09688	51.71	39.67	4.523e-34	0.5456	Gng12
0.09684	38	25.28	5.12e-64	0.5559	Ipo11
0.09681	29.97	19.26	4.445e-63	0.5506	Sclt1
0.09678	37.5	24.45	6.63e-67	0.5567	Camk2g
0.09669	48.59	34.52	3.572e-51	0.5546	Clip2
0.09666	34.87	22.86	8.028e-64	0.554	Klhdc10
0.09663	44.06	29.89	5.191e-61	0.5575	Ptprs
0.09659	46.87	33.11	2.25e-52	0.5546	Rnpep
0.09657	35.2	23.12	3.048e-62	0.5536	Golim4
0.09657	55.78	41.39	5.669e-41	0.5508	Add1
0.09653	89.17	77	6.64e-05	0.5179	Cd33
0.09635	45.45	31.23	5.402e-58	0.5567	Bicral
0.09627	55.66	41.23	7.824e-40	0.5501	Jade2
0.09625	52.09	38.38	5.066e-43	0.5512	Sec63
0.09618	40.74	26.21	1.554e-72	0.5606	Slc25a37
0.09618	34.25	23.02	5.51e-56	0.5505	Slc9a7
0.09615	37.04	23.87	4.987e-70	0.5577	Orc3
0.09614	40.45	26.94	2.44e-64	0.5573	Ankrd13c
0.09613	46.76	32.67	3.248e-55	0.5559	Smap1
0.09606	27.55	18.28	1.452e-50	0.5441	Wdpcp
0.09592	50.83	37.02	5.814e-46	0.5525	Appl2
0.09581	41.49	28.83	1.41e-53	0.553	Pkd2
0.0957	75.67	63.03	7.306e-14	0.531	Slc1a3
0.09565	35.74	22.63	1.023e-73	0.5582	Fbh1
0.09562	49.22	34.59	6.697e-50	0.554	Crybb1
0.09557	42.81	29.64	4.218e-55	0.5543	Flnb
0.09544	67.3	52.75	4.202e-24	0.5405	Pitpna
0.09541	34.63	21.27	1.197e-79	0.5595	Trit1
0.09537	35.54	23.19	8.514e-66	0.5552	Atp11b
0.09533	27.19	18.13	1.032e-47	0.5426	Lyrm4
0.09532	55.52	41.49	2.135e-38	0.5492	Mindy2
0.09524	43.69	29.84	1.211e-59	0.5567	Brd7
0.09523	25.67	15.94	2.244e-60	0.5462	Cdin1
0.09513	83.1	69.64	1.198e-07	0.5228	Scarb2
0.09509	43.52	29.61	3.498e-59	0.5564	Foxk1
0.09508	46.07	31.5	3.468e-59	0.5575	Msl2
0.09498	37.77	24.63	6.116e-67	0.5569	Wwp1
0.09487	28.24	15.82	3.494e-92	0.5582	Siah1a
0.09482	51.21	36.81	2.682e-48	0.5538	Zfp207
0.0947	30.57	19.7	1.12e-60	0.55	Tmem241
0.09466	39.92	26.85	2.741e-61	0.5557	Atp6v1h
0.09462	35.73	23.12	3.973e-67	0.5558	Cul4a
0.0946	49.4	34.98	1.231e-50	0.5545	Gxylt1
0.09453	32.48	19.89	1.24e-76	0.557	Ctnnbl1
0.09452	40.57	26.83	7.893e-65	0.5575	Ufl1
0.09438	45.77	32.17	3.858e-51	0.5535	Mroh1
0.09429	51.94	37.95	1.14e-43	0.5515	Zfp385a
0.09427	36.16	23.9	1.071e-63	0.5548	Odf2
0.09426	51.58	37.17	7.224e-46	0.5526	Resf1
0.0942	50.94	37.39	4.058e-42	0.5503	Pnpla8
0.09413	31.01	19.59	2.935e-67	0.5528	Prmt3
0.09406	37.35	24.44	3.298e-65	0.5559	Dhx57
0.09396	40.46	27.21	7.157e-61	0.5558	Dnm1l
0.09394	34.04	21.55	2.027e-70	0.5559	Zfp182
0.09393	27.23	16.08	5.017e-76	0.5526	Dcaf10
0.0939	51.16	38.19	1.966e-38	0.5482	Atxn10
0.09386	39.46	26.55	3.135e-60	0.555	Zcchc24
0.09386	51.29	37.87	3.732e-40	0.5492	Slc43a2
0.09381	29.02	18.76	8.546e-59	0.5483	Rassf8
0.09379	40.42	27.77	2.76e-56	0.5538	Csnk1g3
0.09378	54.21	39.13	1.581e-44	0.5525	Srsf11
0.09376	44.49	31.52	1.234e-50	0.5529	Ergic1
0.09374	58.67	44.44	1.091e-34	0.5474	Kif1b
0.09373	44.65	30.64	1.069e-57	0.5562	Rc3h2
0.09371	30.22	18.6	8.423e-72	0.5537	Caap1
0.0937	30.83	18.83	2.682e-75	0.5553	Rev1
0.09368	55.98	42.76	5.676e-34	0.5464	Abcd2
0.09366	49.86	36.07	4.434e-46	0.5522	Uso1
0.09362	42.65	30.78	4.685e-44	0.5488	Gm40645
0.09361	41.49	29.47	8.445e-48	0.5503	Cyria
0.09359	37.15	24.32	5.93e-66	0.5562	Ddx50
0.09358	76.62	62.21	6.988e-13	0.5298	Gcnt1
0.0934	35.04	22.75	1.934e-64	0.5543	Crtc3
0.09329	30.67	17.75	1.119e-89	0.5596	Atg16l1
0.09329	44.16	30.74	1.564e-53	0.5541	Camsap2
0.09317	44.81	30.85	1.944e-56	0.5557	Ctcf
0.09317	37.17	24.57	2.235e-63	0.5552	Ext2
0.09316	33.94	21.67	9.162e-68	0.5549	Arhgef18
0.09303	45.94	32.27	2.616e-51	0.5536	Apobec1
0.09297	33.89	21.2	4.718e-73	0.5567	Tsc1
0.09296	30.72	18.91	1.991e-73	0.5546	Trim24
0.09279	34.12	23.73	9.313e-48	0.5468	Coro2a
0.09275	30.4	18.54	6.952e-74	0.5545	Mindy3
0.09273	43.91	30.53	8.617e-55	0.5546	Hnrnpr
0.0927	45.21	31.18	6.975e-57	0.5561	Csnk2a1
0.09268	32.28	21.97	9.118e-51	0.5472	Atg7
0.09261	26.83	14.25	1.925e-102	0.5594	Gm46367
0.09256	33.17	20.66	5.171e-73	0.5562	Hbs1l
0.09251	55.52	41.19	4.58e-38	0.5489	Adcy7
0.0925	41.24	27.9	1.309e-58	0.5551	Jak2
0.09246	28.41	17.41	4.146e-68	0.551	Adarb1
0.09243	48.24	34.51	4.96e-48	0.5528	Smox
0.09226	32.54	20.22	1.703e-71	0.5552	Tmc7
0.09224	49.09	34.61	9.854e-51	0.5544	Mfap3
0.09213	39.65	27.14	2.722e-56	0.5534	Nr1d2
0.09209	63.77	49.21	2.206e-26	0.542	Slc23a2
0.09202	40.11	27.64	1.673e-55	0.5533	Specc1l
0.09202	40.26	27.88	3.321e-54	0.5528	Rnf115
0.09194	31.49	19.36	3.413e-75	0.5558	Nfxl1
0.09194	53.56	38.61	7.587e-46	0.5531	Dhx15
0.09189	28.83	17.06	8.891e-79	0.5548	Pus10
0.09189	39.77	26.72	1.478e-59	0.5548	Cul5
0.09182	52.39	38.98	1.929e-38	0.5485	Padi2
0.09174	48.99	34.54	5.903e-51	0.5545	Mlxipl
0.09162	74.12	59.95	5.594e-16	0.5333	Spi1
0.09157	35.09	23.51	3.48e-58	0.5519	Pcnx
0.09155	39.18	25.84	1.028e-64	0.5567	Cpne1
0.09152	32.74	20.47	1.066e-71	0.5555	Fbxo42
0.09149	53.41	38.96	4.8e-42	0.5508	Tbc1d9b
0.09128	80.53	66.4	1.325e-10	0.5271	Rab14
0.09125	54.52	40.98	4.651e-35	0.5468	Atp7a
0.09124	32.31	20.05	2.034e-72	0.5554	Gm34589
0.09121	51.74	37.35	2.023e-44	0.5518	Dnajb6
0.09119	24.16	14.21	1.514e-68	0.5475	Prim2
0.09119	39.65	29.12	7.098e-39	0.5449	Cers6
0.09116	60.3	45.23	3.817e-33	0.5465	Tcf25
0.09113	52.75	38.8	1.361e-41	0.5505	Smarca4
0.09112	42.11	29.05	8.162e-54	0.5533	Usf3
0.09108	32.91	21.06	1.987e-65	0.5533	St7l
0.09102	26.4	15.1	1.586e-80	0.5531	Fancl
0.091	25.26	14.83	2.294e-73	0.5501	Tasp1
0.09094	38.46	25.66	4.128e-61	0.5549	Tdrd7
0.09082	49.06	34.56	1.387e-49	0.5538	Gm37472
0.09077	63.03	48.46	2.611e-29	0.5442	Parvg
0.09071	36.16	23.33	6.857e-66	0.5554	Qser1
0.09067	39.43	26.58	1.104e-58	0.5543	Nfatc3
0.09066	34.14	21.36	2.807e-73	0.557	Kdm1a
0.09066	38.51	25.64	2.892e-62	0.5554	Abca3
0.09066	32.59	20.41	1.092e-69	0.5546	Dcun1d1
0.09066	33.63	21.38	1.331e-67	0.5546	Msrb2
0.09064	46.45	32.8	6.093e-50	0.5531	Tgfbrap1
0.09054	29.05	19.09	2.952e-52	0.5457	Cdyl2
0.09052	31.76	19.56	6.886e-74	0.5555	Kdm5b
0.09049	41.61	29.15	1.926e-50	0.5516	Zc3h13
0.09046	79.58	66.05	1.511e-09	0.5256	Tnfrsf21
0.09042	39.85	26.77	4.429e-59	0.5547	Morc2a
0.0904	49.86	35.3	5.204e-49	0.5537	Tra2b
0.09038	39.46	25.84	1.384e-64	0.5567	Ap2a2
0.09033	34.46	20.8	2.164e-81	0.5598	Adap2os
0.09033	38.95	27.55	7.56e-48	0.5492	Ccdc88a
0.09029	68.03	53.73	1.065e-19	0.5366	Clip1
0.09026	45.92	31.87	1.061e-52	0.5543	Nipa2
0.09025	34.25	21.94	1.686e-67	0.555	Phf8
0.09013	98.55	93.29	0.001416	0.5149	Itgam
0.0901	26.98	15.11	1.559e-88	0.556	Ptcd3
0.09009	35.54	22.8	2.228e-68	0.5561	Trmt1l
0.09001	43.62	30.66	1.071e-49	0.552	St3gal2
0.08997	40	26.77	7.346e-62	0.556	Dcaf12
0.08995	42.35	29.82	7.787e-50	0.5516	Clcn3
0.08991	24.68	13.83	1.203e-81	0.5518	Gtf2ird1
0.08988	34.2	21.14	4.092e-75	0.5576	Paxbp1
0.08983	59.63	44.61	5.037e-32	0.5456	Acox3
0.08976	36.92	24.59	5.068e-60	0.5536	Setx
0.0897	35.48	24.49	4.587e-49	0.5481	Akap7
0.08962	54.1	39.27	4.734e-42	0.551	Sh2b3
0.08959	83.26	69.4	7.176e-07	0.5215	Sf3b1
0.08958	43.45	30.27	4.247e-53	0.5536	Stk38
0.08952	30.95	19.62	1.896e-65	0.552	Atg4c
0.08948	39.8	26.43	1.184e-61	0.5557	Map3k4
0.08941	44.26	31.05	3.281e-49	0.5519	Csad
0.08927	39.62	26.51	2.431e-60	0.5551	Nemf
0.08918	45.72	31.07	5.782e-59	0.5572	Gcn1
0.08914	34.33	21.7	2.489e-70	0.556	Gon4l
0.08892	39.19	26.29	2.756e-60	0.5549	Gm29609
0.08892	28.78	19.03	9.499e-52	0.5453	Dph6
0.08892	41.07	30.47	1.838e-36	0.544	Gm26740
0.0889	45.67	32.21	4.438e-49	0.5524	Plekha1
0.08889	22.22	11.86	1.178e-81	0.5491	Hlf
0.08877	23.31	15.18	6.825e-46	0.5391	Mrc2
0.08876	68.13	54.38	3.468e-20	0.5371	Arhgap30
0.08874	49.26	35.95	8.954e-43	0.5502	Tmod3
0.08872	33.48	20.94	7.323e-72	0.556	Ctdspl2
0.08862	39.24	27.35	1.453e-49	0.5501	Etv1
0.0885	30.11	18.18	1.112e-75	0.5548	Pik3c3
0.08849	30.07	19.08	6.773e-62	0.55	Mrtfb
0.08848	34.92	22.87	1.501e-62	0.5535	Cdc123
0.08844	29.47	17.07	1.692e-84	0.557	Cog3
0.08843	37.67	25.5	7.554e-56	0.5522	Dop1b
0.08839	29.25	19	1.014e-55	0.5472	Itpr1
0.08836	52.89	39.41	1.395e-36	0.5474	Fgd3
0.08835	25.42	15.79	1.956e-59	0.5457	Zfp827
0.08834	23.31	15.25	4.224e-44	0.5384	2610035D17Rik
0.08833	40.49	27.83	6.081e-54	0.5527	Bdp1
0.08832	42.79	29.48	1.176e-53	0.5535	Lars
0.08818	42.06	28.33	1.043e-58	0.5555	Sin3a
0.08808	29.9	19.86	3.209e-52	0.5463	Epm2a
0.08806	41.12	28.63	1.884e-49	0.5508	Klhl5
0.08805	42.93	31.42	2.27e-40	0.5469	Gm40841
0.08795	31.49	19.66	6.734e-70	0.554	Ric1
0.08794	34.23	23.51	1.347e-48	0.5472	Gm49797
0.08788	34.17	22.46	3.706e-60	0.5521	Cmtm4
0.08788	39.35	27.38	2.966e-49	0.55	Ube2e1
0.08784	36.92	24.11	2.346e-63	0.5549	Rif1
0.08782	38.15	25.41	1.333e-60	0.5545	Rbm27
0.08774	70.11	55.63	3.729e-18	0.5352	Ptpro
0.08771	30.78	19.46	3.049e-65	0.5518	Dcp1a
0.08771	55.88	42.11	2.6e-35	0.5472	Stau1
0.08769	39.97	27.24	1.171e-55	0.5532	Arhgef7
0.08767	31.39	19.83	2.229e-66	0.5526	Atm
0.08762	37.65	25.21	2.448e-58	0.5533	Madd
0.0876	34.74	23.04	3.037e-58	0.5516	Gm49359
0.08755	28.92	18.26	2.866e-59	0.5482	Col6a3
0.08751	36.48	26.67	5.289e-38	0.5431	Hpcal1
0.08743	44.98	32.06	2.549e-45	0.5502	Otulin
0.08742	35.05	23.62	2.854e-55	0.5506	Yaf2
0.08741	22.72	13.84	1.09e-56	0.5424	Cep112
0.08735	34.36	22.03	1.675e-65	0.5542	Chfr
0.08734	31.09	20.91	2.671e-49	0.5457	Gm20696
0.08733	36.85	24.2	3.133e-61	0.554	Iars
0.08732	38.81	25.47	1.343e-62	0.5555	Chordc1
0.08722	47.45	33.76	7.309e-46	0.5513	Ilrun
0.08721	95.61	87.46	0.004177	0.5137	Cttnbp2nl
0.08717	47.61	33.45	5.891e-50	0.5535	Sdha
0.08715	43.69	31.02	4.775e-47	0.5507	Slk
0.08706	27.84	15.85	1.154e-82	0.5549	Acvr2b
0.08704	32.2	20.41	2.072e-66	0.5532	Polr3b
0.08697	95.69	86.51	0.1091	0.5092	Srrm2
0.0869	57.4	42.67	3.99e-35	0.5473	Smarcc2
0.08677	33.08	21.49	5.248e-62	0.5522	Rubcn
0.08676	34.82	22.13	3.811e-68	0.5555	Narf
0.0866	32.79	21.4	5.075e-60	0.5512	Ddx10
0.08659	29.3	18.2	4.725e-66	0.551	Phka1
0.08658	36.98	24.73	8.697e-58	0.5527	Edem3
0.08656	26.25	17.11	2.251e-50	0.543	Mrps28
0.08653	64.81	51.33	4.582e-22	0.5385	Elf1
0.08651	48.78	35.39	2.207e-43	0.5504	Lsm14a
0.08651	54.33	40.18	4.35e-38	0.5486	Prpf4b
0.08648	34.24	21.77	2.164e-67	0.5548	Pcmtd2
0.08648	41.47	29.12	1.131e-49	0.5511	Psmd1
0.08644	35.33	23.18	3.372e-61	0.5532	Lmf1
0.08641	50.44	37.08	4.042e-40	0.549	Yy1
0.08629	85.4	73.74	1.241e-05	0.5193	Il6st
0.08627	30.91	18.72	1.146e-74	0.5551	Sarnp
0.08621	30.47	18.81	6.827e-71	0.5536	Polb
0.0862	52.32	38.86	2.285e-37	0.5477	Ago1
0.08618	58.08	43.57	4.763e-33	0.546	Arhgef1
0.08611	29.11	18.05	3.571e-67	0.5513	Apaf1
0.08607	53.17	38.95	2.675e-39	0.5491	Tcirg1
0.08607	99.61	97.18	1.789e-07	0.5227	Sirpa
0.08606	36.74	24.66	2.018e-56	0.5519	Fbxw8
0.08601	31.89	20.53	6.365e-62	0.5513	Galnt12
0.08595	81.95	68.51	1.999e-08	0.524	Numa1
0.08591	35.33	22.29	3.524e-70	0.5565	Idh2
0.08591	37.04	24.59	2.964e-59	0.5533	Trp53bp1
0.08591	24.35	14.56	8.603e-65	0.5465	Fancc
0.08584	29.06	19.18	1.39e-51	0.5454	Nubpl
0.08583	32.81	20.59	6.457e-68	0.5541	Rad54l2
0.08579	26.73	16.92	3.897e-57	0.5459	Arhgap18
0.08576	48.11	36.14	5.559e-34	0.5446	Ankrd12
0.0857	25.56	15.04	6.96e-73	0.5502	Ap3s1
0.08566	40.77	27.76	5.329e-55	0.5532	Ube4a
0.08566	34.29	22.52	1.816e-60	0.5523	Pi4kb
0.08563	27.86	17.6	1.141e-60	0.5481	Disp1
0.08545	68.42	54.23	1.776e-18	0.5354	Actr3
[truncated: 55,011 more rows]

## Sheet: DE-InfM
logFC	pct_1	pct_2	p_val_adj	auc	gene_names
0.9687	81.69	33.39	0	0.8102	Jun
0.9131	80.7	38.01	0	0.784	Cd83
0.825	94.94	80.67	0	0.7147	Arsb
0.7788	77.92	39.47	0	0.7568	Il1a
0.7464	63.09	15.6	0	0.7569	Atf3
0.72	56.07	6.985	0	0.7537	Fos
0.7046	97.6	87.03	0	0.7555	Plek
0.6598	66.6	26.39	0	0.7344	Rasgef1b
0.6257	64.43	29.65	0	0.7097	Neat1
0.6099	53.11	8.114	0	0.7342	Fosb
0.5854	62.33	22.86	0	0.723	Zfp36
0.5824	56.62	17.06	0	0.7168	Nfkbiz
0.5638	77.86	51.02	0	0.7056	Wsb1
0.5614	62.77	25.25	0	0.7171	Btg2
0.5501	70.9	36.58	0	0.7089	Mir142hg
0.5248	79.91	56.85	6.476e-269	0.6824	Ptpro
0.5199	46.15	6.204	0	0.7046	Dusp1
0.5186	80.49	56.86	5.946e-277	0.6851	Slc15a3
0.5061	62.94	32.68	0	0.684	Srgn
0.4744	69.03	43.77	1.12e-250	0.6682	Gpr183
0.4735	85.32	68.13	3.005e-226	0.6706	Rin2
0.4709	63.97	38.12	3.064e-260	0.6662	Sgk1
0.4644	60.43	30.43	0	0.673	ENSMUSG00000120580
0.4574	79.32	59.59	4.42e-223	0.667	Txnip
0.4489	63.73	37.59	1.405e-264	0.667	Zfand5
0.4243	87.66	73.42	2.885e-156	0.6426	Cd86
0.4241	77.95	63.95	1.326e-93	0.609	Hdac9
0.4164	49.17	19.59	0	0.6594	Rgs1
0.4158	89.94	74.6	1.127e-156	0.6429	Lncpint
0.4092	44.31	15.75	0	0.6508	Creb5
0.4018	88.53	75.96	4.493e-148	0.6391	Ccr5
0.3943	84.06	67.96	9.055e-169	0.6473	Skil
0.3924	49.66	35.82	1.206e-70	0.5842	Xist
0.3906	56.3	32.88	2.846e-212	0.6442	Rnf19b
0.3883	37.29	5.181	0	0.6633	Klf2
0.3801	78.59	60.39	2.189e-170	0.6462	Ucp2
0.3768	76.19	61.3	7.894e-111	0.618	Hpgd
0.3765	53.23	26.2	1.799e-272	0.654	Ppp1r10
0.3765	50.34	30.68	1.498e-135	0.6125	Nrxn1
0.375	73.68	54.16	1.466e-174	0.6457	Clk1
0.3745	99.71	96.68	3.888e-168	0.649	Tmcc3
0.3741	60.51	36.82	3.54e-203	0.6453	Evi2
0.3707	46.39	19.18	0	0.6491	Tnfaip3
0.3706	52.09	22.51	0	0.6606	Per1
0.3677	47.73	18.9	0	0.6559	Junb
0.3669	74.35	56.8	8.713e-139	0.6308	Rhoh
0.3617	48.11	21.38	1.127e-281	0.6473	Dnajb4
0.3614	65.05	43.59	1.922e-178	0.6414	Rel
0.3602	48.93	22.1	2.037e-279	0.6482	Plekho2
0.3592	76.69	60.19	6.531e-104	0.6141	Ssbp2
0.3577	33.81	4.006	0	0.6511	Egr1
0.3577	55.43	32.03	5.128e-198	0.6383	Klf6
0.3569	91.46	80.2	9.065e-82	0.6036	Klf12
0.3568	72.45	55.65	8.193e-127	0.6246	Pfkfb3
0.3493	90.38	78.2	9.096e-120	0.6253	Rab8b
0.3491	49.37	25.6	2.95e-194	0.6285	Nme7
0.3475	81.22	69.18	7.065e-121	0.6248	Rgs2
0.3429	97.84	92.2	1.718e-94	0.6117	Runx1
0.3426	96.78	88.97	1.344e-136	0.6342	Ptprc
0.3419	61.89	41.23	8.328e-162	0.6329	Litaf
0.3414	71.13	52.94	6.57e-137	0.6284	Zfp36l1
0.3399	54.78	35.41	1.992e-153	0.6245	Tmx4
0.3381	73.88	57.11	4.294e-118	0.6207	Xpr1
0.3374	95.93	88.76	3.146e-130	0.6311	Jmjd1c
0.3372	67.86	49.97	5.595e-141	0.629	Sat1
0.3324	86.25	76.83	2.4e-65	0.5924	Cacnb2
0.3303	99.12	95.37	1.238e-98	0.6141	Plcl1
0.3299	56.86	34.56	7.02e-182	0.6351	Arf4
0.3283	44.46	19.99	5.59e-248	0.6346	Nfkbia
0.328	47.85	23.35	1.786e-233	0.6371	Tagap
0.3275	46.77	21.29	1.969e-251	0.6386	Tob2
0.3265	35.54	18.05	7.401e-142	0.5968	Gm12865
0.3231	45.28	20.3	1.861e-239	0.6331	Cd300lf
0.3218	58.96	38.31	2.561e-161	0.6304	Ccnl1
0.3195	100	99.59	0	0.7191	Malat1
0.3195	54.61	35.47	1.997e-138	0.6182	Mapkapk2
0.3186	43	17.72	1.293e-267	0.6349	Arrdc3
0.3175	99.71	96.72	1.095e-117	0.6247	Maml3
0.3126	57.09	42.72	8.355e-69	0.587	Cacna1a
0.31	93.86	85.67	1.739e-94	0.6116	Dennd4a
0.3088	76.89	63.13	1.267e-105	0.6156	Ehd4
0.3084	98.33	93.12	2.262e-147	0.6395	Ddx5
0.3081	82.57	70.17	1.478e-97	0.6123	Ctsc
0.307	38.34	12.98	0	0.6315	Ddit3 - ENSMUSG00000025408
0.3039	56.13	34.78	1.698e-156	0.6254	Btg1
0.303	31.97	5.695	0	0.6341	Nr4a1
0.303	97.28	91.27	1.053e-80	0.6032	Gab2
0.3029	95.2	89.01	1.308e-65	0.5931	Maml2
0.3023	99.74	98.25	1.651e-126	0.6293	Nav2
0.3015	74.96	60.41	1.591e-76	0.5979	Chst11
0.3007	35.3	9.258	0	0.6342	Ppp1r15a
0.3006	69.08	52.48	1.719e-111	0.6157	Samsn1
0.2965	83.04	71.85	8.16e-84	0.6042	Cd9
0.296	97.05	92.24	2.153e-44	0.5765	Csmd3
0.2929	53.2	33.65	1.447e-139	0.6171	Tbpl1
0.2873	91.55	81.91	1.196e-75	0.5997	St3gal6
0.2846	53.35	33.38	4.737e-138	0.6163	Nlrp3
0.2843	44.05	21.95	1.103e-193	0.6219	Adrb2
0.2832	51.62	31.59	9.194e-147	0.6181	Mat2a
0.2809	94.5	87.26	4.543e-91	0.6096	Basp1
0.2808	71.31	56.03	2.101e-96	0.6087	Clip1
0.2796	71.28	56.52	3.834e-92	0.6064	Nfe2l2
0.2788	45.36	24.09	5.136e-170	0.6174	Stk17b
0.2784	42.94	22.09	2.968e-170	0.6142	Bcl2a1b
0.2768	100	98.9	2.925e-103	0.6168	Plxdc2
0.2768	64.64	47.34	8.708e-102	0.6084	C3ar1
0.2758	82.13	69.98	8.117e-70	0.595	Arhgap25
0.2742	35.68	13.15	1.293e-253	0.6181	Bcl6
0.274	84.26	74.68	3.466e-55	0.5848	Rtn1
0.2736	77.63	65.12	3.498e-82	0.6023	Ddx3x
0.2735	69.06	52.98	2.162e-101	0.6105	Eif4a2
0.2711	89.12	78.92	9.501e-91	0.6091	Cd53
0.2698	96.31	87.6	1.943e-59	0.5886	Gnaq
0.2689	69.64	59.18	1.445e-43	0.5735	Kcnma1
0.2674	72.68	58.18	6.837e-71	0.5937	Lrrc8d
0.2672	62.45	45.59	1.129e-107	0.6106	Mcl1
0.2663	29.25	16.04	5.421e-81	0.5692	Arhgap15
0.2655	82.63	72.06	2.221e-71	0.5962	Gnas
0.264	32.73	9.817	0	0.6183	Nfkbid
0.264	76.16	68.44	2.022e-29	0.5614	Wwox
0.2633	56.22	48.11	9.381e-28	0.5564	Fgf13
0.2632	93.95	87.58	3.59e-46	0.578	Plxna4
0.2618	62.59	47.67	2.011e-84	0.5987	Mapre2
0.2611	60.51	43.76	1.334e-101	0.6065	H3f3b
0.2609	38.93	16.78	9.781e-216	0.618	Tgif1
0.2599	78.44	63.85	1.249e-70	0.5947	Irak2
0.2598	91.46	83.39	2.04e-41	0.5738	Cadm1
0.2577	71.1	57.54	1.252e-85	0.6028	Sdcbp
0.2557	76.57	69.47	2.669e-28	0.5603	Fhit
0.2533	39.05	19.24	1.733e-162	0.6064	Slc25a25
0.2527	32.41	11.72	4.407e-231	0.6078	Cited2
0.2478	68.35	54.55	1.013e-80	0.5989	Hnrnpc
0.2476	84.03	74.95	1.175e-59	0.5882	Mylip
0.2462	94.27	86.51	1.313e-40	0.5731	Large1
0.2456	96.64	92.03	8.659e-54	0.5843	Ubash3b
0.2443	85.23	73.17	5.249e-64	0.5912	Fus
0.2435	54.81	38.98	1.111e-86	0.5956	Hsp90aa1
0.243	27.55	6.622	0	0.6066	Ccl3
0.2423	27.35	6.617	0	0.6057	Ccl4
0.2408	86.49	74.49	2.206e-55	0.585	Il10ra
0.2407	90.26	81.35	1.004e-49	0.5808	Rasgrp3
0.2379	87.36	77.67	9.607e-48	0.579	Lims1
0.2375	59.78	45.44	1.251e-74	0.5919	Polr2a
0.2369	75.49	61.82	2.988e-61	0.5878	Aim2
0.2367	31.44	10.46	4.646e-252	0.6085	Zswim4
0.2355	54.55	38.75	1.755e-90	0.5975	Smad7
0.2353	54.75	39.72	7.984e-85	0.5949	Tent5c
0.2353	98.39	92.64	2.747e-40	0.5729	Snx29
0.2345	77.71	68.91	1.911e-36	0.5684	Apba1
0.2334	85.23	75.28	6.567e-60	0.5884	Efhd2
0.2329	58.5	45.32	2.007e-49	0.5746	Akt3
0.2319	29.25	7.978	2.831e-302	0.6089	Socs3
0.2318	48.7	32.25	2.45e-98	0.5968	Etf1
0.2316	99.74	97.72	2.62e-59	0.5885	Slc8a1
0.2307	62.15	46.65	2.831e-78	0.5947	Pea15a
0.2299	41.01	22.44	1.923e-135	0.6019	Ier5
0.2294	80.96	69.28	4.007e-50	0.5804	Dgkd
0.2293	66.39	52.03	6.294e-75	0.5946	Srsf5
0.2293	61.74	47.2	1.256e-72	0.5914	Pmp22
0.228	90.67	83.29	1.694e-48	0.5799	Retreg1
0.2278	84	74.46	5.168e-39	0.5712	AU020206
0.2276	99.65	97.22	1.082e-61	0.5903	Ldlrad4
0.226	64.2	52.46	8.905e-47	0.5747	Atg10
0.2259	50.42	34.85	1.482e-88	0.5938	Azin1
0.2252	33.81	15.12	8.083e-168	0.5994	Ifrd1
0.2236	24.07	4.596	0	0.5988	Gem
0.2232	99.12	95.55	6.875e-52	0.5828	Pde3b
0.223	92.22	85.14	2.611e-34	0.5672	4933406I18Rik
0.2228	78.36	66.59	5.023e-55	0.5839	Slc16a6
0.2215	30.86	12.44	4.177e-181	0.5965	Errfi1
0.2213	88.59	80.05	1.157e-55	0.5855	Lamp2
0.2201	82.1	70.02	8.737e-42	0.5734	Tbc1d16
0.2193	68.18	55.25	9.305e-62	0.5867	Stat3
0.2192	61.48	47.21	9.946e-65	0.5863	Dusp6
0.2191	38.55	24.6	2.564e-79	0.5796	C5ar1
0.2188	37.55	18.19	9.302e-153	0.6012	Kdm6b
0.2179	94.33	87.95	2.348e-49	0.5807	Ski
0.2163	90.61	81.29	7.155e-37	0.5696	Zfand3
0.2158	59.34	45.62	4.284e-68	0.5878	Cebpg
0.2148	84.94	77.58	1.114e-27	0.5601	Smyd3
0.2141	32.23	13.42	7.078e-177	0.598	Cbx4
0.2139	93.21	86.27	6.479e-34	0.5668	Zswim6
0.2139	97.13	91.71	1.505e-30	0.5635	Inpp4b
0.2138	59.87	46.76	1.331e-60	0.5832	Gls
0.2137	48.44	32.46	1.085e-87	0.5915	Vmp1
0.2128	66.51	54.41	8.67e-51	0.5784	Susd6
0.2128	91.52	84.23	2.452e-32	0.5652	Ttc28
0.2123	58.79	48.52	2.913e-31	0.5601	Rn7sk
0.212	40.39	22.01	1.848e-110	0.5915	Rad51b
0.2119	93.68	85.85	1.507e-33	0.5665	Tbxas1
0.2118	82.74	72.68	1.288e-33	0.566	Cables1
0.2111	55.13	44.98	1.777e-39	0.5664	Gatm
0.2106	48.64	32.62	1.837e-91	0.5936	Srsf3
0.2105	40.89	25.52	2.412e-90	0.5862	Dnaja1
0.2099	20.5	4.919	3.007e-238	0.5795	ENSMUSG00000121207
0.2084	90.35	82.1	2.287e-41	0.5737	Pik3r1
0.2081	84.56	75.31	2.971e-49	0.5801	Rhob
0.2073	93.21	86.13	4.913e-29	0.5618	E230029C05Rik
0.2067	51.01	37.26	1.014e-65	0.5821	Rab43
0.2067	64.55	56.8	8.43e-25	0.555	Fat3
0.2063	42.35	26.01	6.324e-100	0.5914	H3f3a
0.2063	77.98	67.15	1.594e-45	0.5763	Nptn
0.2061	74.03	64.04	8.831e-34	0.5654	Kcnk13
0.2054	69.76	58.24	5.629e-51	0.5794	Ube2h
0.2052	30.94	14.09	1.596e-142	0.5888	Dnajb1
0.2051	66.13	54.18	4.324e-56	0.5823	Hnrnph1
0.2042	34.16	18.04	4.274e-113	0.5861	Rab20
0.204	69.06	55.5	2.35e-45	0.5744	Chd2
0.2039	52.12	38.04	5.975e-68	0.584	Kras
0.2037	76.98	65.1	2.954e-46	0.5767	Edem1
0.2036	29.57	11.03	5.705e-193	0.5956	Plk3
0.2027	88.65	80.63	3.542e-30	0.5629	Btbd9
0.2025	93.04	87.05	3.306e-29	0.562	Nfia
0.2019	81.11	71.54	1.092e-34	0.567	Smad3
0.2002	63.09	49.48	5.927e-60	0.5838	Eif4a1
0.1996	82.98	74.07	2.979e-39	0.5714	Hspa5
0.1993	29.54	11.49	1.103e-181	0.5938	Mafk
0.199	41.65	25.54	6.864e-93	0.5876	Zeb2os
0.1988	76.92	65.04	4.409e-42	0.5732	Clint1
0.1988	89.85	81.13	1.066e-32	0.5655	Chd7
0.1974	75.69	65.26	6.781e-45	0.5756	Gcnt1
0.1974	78.33	66.27	2.629e-40	0.5717	Ppp1r21
0.1972	48.84	36.39	9.367e-50	0.5709	Ipcef1
0.197	25.39	7.474	1.655e-233	0.5918	Ccrl2
0.1969	41.65	25.86	7.863e-85	0.584	Dusp16
0.1964	40.04	24.22	8.763e-94	0.5865	Sub1
0.1961	85.52	77.44	4.603e-32	0.5647	Wipf1
0.1952	71.66	60.16	4.286e-47	0.5766	Ncf2
0.1952	78.82	68.02	3.507e-42	0.5736	Ftl1
0.1949	50.39	37.23	2.391e-63	0.5805	Gm37472
0.1949	55.95	46.15	1.154e-31	0.5598	A830008E24Rik
0.1948	89.27	82.4	1.657e-46	0.5782	Hnrnpa2b1
0.1938	84.73	77.68	8.231e-23	0.5545	Ptprm
0.1937	30.18	15.17	4.989e-110	0.5796	Cass4
0.1936	46.94	30.95	1.161e-81	0.5871	Ubc
0.1934	28.34	15.04	5.229e-82	0.5681	Colec12
0.1934	58.17	46.49	3.226e-42	0.5693	Rassf3
0.1932	34.31	18.44	1.121e-101	0.5822	Tsc22d3
0.1932	67.71	57.11	4.317e-41	0.571	Nlrp1b
0.1926	89.94	80.44	6.39e-31	0.5637	Fnbp1
0.1921	65.28	56.73	8.378e-24	0.5539	Arhgap24
0.1917	51.27	37.13	2.07e-69	0.5843	Sqstm1
0.1913	80.7	72.73	3.646e-23	0.5547	Pard3b
0.1912	73.21	62.04	2.412e-39	0.5703	Fnip1
0.191	97.1	91.36	1.459e-27	0.5603	Numb
0.191	94.68	89.09	1.486e-24	0.5568	Prkcb
0.1908	96.69	90.91	7.744e-28	0.5606	Plcl2
0.1906	91.43	83.39	6.509e-28	0.5605	Skap2
0.1901	87.6	78.5	1.98e-36	0.569	Rbm39
0.1901	84.73	75.29	4.194e-33	0.5657	Luc7l2
0.1897	92.04	83.93	1.754e-24	0.5567	Dleu2
0.1891	79.53	69.8	1.224e-30	0.5628	Acer3
0.1888	55.22	41.43	2.433e-62	0.5822	Atp6ap2
0.1883	17.43	5.397	6.335e-141	0.561	Gm8189
0.1879	93.33	85.83	7.102e-29	0.5616	Mgat4a
0.1877	48.23	35	1.521e-59	0.5768	Map3k14
0.1875	79.41	69.96	4.075e-26	0.558	Pvt1
0.1874	99.03	95.15	4.764e-32	0.565	Foxn3
0.1866	38.72	25.68	7.724e-63	0.5718	Gcnt2
0.1859	73.47	62.9	1.064e-40	0.5716	Spi1
0.1858	43.17	27.98	9.474e-79	0.5829	Herpud1
0.1852	97.48	91.69	4.3e-21	0.5526	Rapgef5
0.1848	27.76	10.39	1.833e-177	0.5893	Ets2
0.1846	64.81	54.34	5.032e-34	0.5641	Rasal2
0.1844	99.91	97.96	1.445e-41	0.5741	Dock4
0.1843	84.38	75.36	1.652e-31	0.564	Ptpra
0.1843	80.78	71.7	1.028e-21	0.5529	Zdhhc14
0.1837	33.78	19.34	6.333e-92	0.5791	Neurl3
0.1836	54.26	41.87	1.145e-51	0.5749	Fgd3
0.1833	65.6	53.89	4.771e-43	0.572	Elf1
0.183	46.33	38.7	7.977e-26	0.5516	ENSMUSG00000120942
0.1827	29.37	13.39	4.041e-128	0.5824	Fhad1
0.1824	95.26	88.74	2.101e-22	0.5543	Ppm1h
0.182	65.49	53.77	5.008e-44	0.5728	Tut7
0.1814	28.52	13.7	9.954e-116	0.5786	Nuak2
0.1813	81.13	71.77	1.034e-28	0.5609	Baz2b
0.1811	93.95	86.88	1.435e-23	0.5556	Lrch1
0.1802	63.64	50.72	3.566e-49	0.5762	Zfp36l2
0.1801	40.71	26.17	8.018e-76	0.5795	Lpar6
0.1792	80.96	70.8	2.102e-30	0.5626	Stard9
0.1791	78.33	68.23	2.538e-31	0.5634	Peli1
0.1791	88.36	81.17	5.903e-21	0.5523	Hivep3
0.1783	66.36	56.06	5.639e-42	0.5715	Ywhaz
0.1779	44.14	30.29	6.849e-67	0.5781	Slc38a2
0.1778	84.29	75.43	1.017e-26	0.559	Phf14
0.1774	57.41	45.57	1.511e-47	0.5732	Nufip2
0.1767	63.44	51.42	3.259e-40	0.569	Tle4
0.1766	63.67	52.51	1.933e-44	0.5728	Ndfip1
0.1765	95.35	89.57	1.391e-26	0.5592	Etv6
0.1764	92.48	84.35	2.673e-27	0.5599	Csf3r
0.1757	97.89	93.48	8.331e-26	0.5583	Ptprj
0.1748	54.81	42.32	2.935e-50	0.574	Impact
0.1744	84.73	75.61	6.492e-25	0.5569	Blnk
0.174	64.73	54.03	2.115e-36	0.5662	Tpd52
0.174	97.05	91.7	1.847e-15	0.545	Mir99ahg
0.1737	82.92	77.22	8.517e-18	0.5481	Slc24a3
0.1735	96.81	91.51	1.402e-23	0.5557	Gm2629
0.1732	37.88	25.16	1.61e-59	0.5693	Ccr6
0.1724	76.25	67.94	4.19e-23	0.5543	Gtdc1
0.1721	90.06	83.78	4.151e-22	0.5538	Exoc4
0.1714	30.65	16.15	6.868e-97	0.5763	Casp4
0.1709	45.72	33.05	1.02e-55	0.573	Pcf11
0.1706	43.43	29.42	8.42e-66	0.5768	Gm49342
0.1704	99.74	97.59	1.188e-39	0.5723	Mef2a
0.1704	98.25	93.9	2.92e-27	0.5599	Apbb1ip
0.1702	49.96	37.48	1.131e-53	0.5742	1810013L24Rik
0.1702	54.58	42.92	3.461e-41	0.5672	Pdlim5
0.1694	41.44	29.61	1.369e-51	0.5679	Fam107b
0.1682	50.22	38.15	1.738e-50	0.5723	Tra2b
0.1678	82.16	72.37	1.612e-30	0.5629	Sf3b1
0.1678	76.57	68.42	1.13e-23	0.555	Peli2
0.1677	51.92	39.85	3.63e-49	0.5721	Rlim
0.1677	82.01	74.06	2.184e-23	0.5551	Ifitm10
0.1674	44.75	32.14	1.914e-56	0.5729	Trp53
0.1674	82.98	74.98	2.229e-30	0.5629	Ncf1
0.1673	33.87	18.86	9.877e-93	0.5789	Jund
0.1672	98.51	94.8	2.303e-21	0.553	Zeb2
0.1664	42.09	29.39	5.169e-57	0.5713	Rnf2
0.1661	52.59	41.04	4.322e-48	0.5718	Eif5
0.1659	70.4	61.58	1.043e-23	0.5544	Lpp
0.1658	98.19	94.32	1.932e-20	0.5518	Slc9a9
0.1656	22.26	6.385	4.491e-205	0.5805	Gm44710
0.1656	45.28	32.92	3.048e-44	0.5649	Naalad2
0.1656	84.06	76.82	3.113e-20	0.5513	Foxp1
0.1644	95.53	90.2	1.535e-17	0.548	Diaph2
0.1643	86.69	78.96	7.164e-19	0.5496	Gm10790
0.1639	68.53	57.49	1.212e-31	0.5624	Atf6
0.1636	65.34	54.82	2.997e-37	0.5671	Erp29
0.1631	85.35	78.83	2.493e-17	0.5475	Prkca
0.163	25.71	10.72	1.144e-133	0.5774	Tagln2
0.1628	46.71	34.24	2.441e-51	0.5708	Vps37b
0.1628	79.29	72.88	8.155e-18	0.5479	Arl15
0.1627	75.43	67.31	3.85e-26	0.5578	Rab31
0.1624	34.25	19.81	5.099e-87	0.5776	Mknk2
0.1624	59.08	48.06	5.095e-31	0.5597	Garnl3
0.1618	54.28	43.19	1.618e-41	0.5675	Sowahc
0.1617	45.45	33.77	6.155e-48	0.5681	Atp6v1a
0.1613	89.7	81.4	1.172e-19	0.5507	Map4k4
0.161	29.48	15.66	2.067e-91	0.5731	Rabgef1
0.161	93.8	86.54	2.821e-23	0.5553	Son
0.1604	56.83	46.79	4.379e-36	0.564	Pdgfb
0.1598	58.94	48.77	1.589e-34	0.5632	Slc37a2
0.1595	88.91	81.25	3.694e-21	0.5526	Mbnl2
0.1592	77.45	69.13	5.492e-28	0.5599	Tnfrsf21
0.1588	93.42	88.9	1.177e-25	0.5581	Gpr34
0.1587	39.78	28.08	1.345e-53	0.568	Taf1d
0.1586	71.69	62.3	3.613e-23	0.5539	Cd180
0.1585	69.49	63.14	2.376e-16	0.5452	Ext1
0.1584	98.48	95.3	1.234e-24	0.5569	Mef2c
0.1583	73.71	63.52	9.473e-25	0.5559	Tec
0.1582	78.15	70.71	8.598e-18	0.5478	Oxr1
0.1581	47.29	34.36	1.795e-53	0.5724	Evi2a
0.158	66.86	56.72	3.323e-34	0.5647	Ptms
0.1579	96.29	91.75	4.589e-19	0.55	Fli1
0.1575	68.27	58.8	6.217e-28	0.5587	Lrrfip1
0.1572	25.45	11.55	2.067e-112	0.5726	Nrbf2
0.1571	69.99	59.18	3.389e-30	0.5612	Nktr
0.157	22.32	6.834	3.461e-189	0.5789	Gm37352
0.157	35.19	24.12	3.811e-52	0.5638	Nudt4
0.156	54.34	43.75	3.138e-38	0.565	Atp1a1
0.1552	21.21	5.705	2.497e-210	0.5783	Csrnp1
0.1546	94.3	89.81	6.207e-17	0.5471	Zbtb20
0.1538	75.17	67.85	5.312e-26	0.5576	Cotl1
0.1535	55.51	44.16	9.252e-41	0.5673	Rsrc2
0.1535	53.88	43.81	4.648e-33	0.5604	Atp7a
0.1534	84.56	77.59	2.7e-28	0.5608	Rap1b
0.1534	88.68	82.69	9.848e-16	0.5453	Fbxl17
0.1527	99.01	96.47	4.107e-26	0.5586	Mbnl1
0.1527	98.83	95.37	8.407e-18	0.5483	Dock2
0.1524	82.6	73.6	2.563e-21	0.5525	Rbm25
0.1522	39.6	26.31	2.411e-62	0.5721	Pnrc1
0.1522	95.03	90.16	1.513e-15	0.5451	Ly86
0.1515	55.81	45.32	9.347e-37	0.5642	Arl4c
0.1514	32.38	18.97	4.156e-76	0.5713	Qsox1
0.1512	76.25	67.88	1.228e-18	0.5487	Abr
0.1509	24.77	11.14	1.386e-110	0.571	Zc3h12a
0.1509	36.09	24.25	2.245e-57	0.5671	Srsf7
0.1495	66.16	56.73	3.745e-28	0.5586	Kpna4
0.1495	94.85	89.28	8.242e-13	0.5409	Chn2
0.1494	82.68	77.61	1.543e-15	0.5449	Mctp1
0.149	37.12	25.34	1.443e-52	0.5652	C9orf72
0.149	57.41	47.36	1.904e-31	0.5599	Lacc1
0.1489	41.12	30.21	3.071e-43	0.5624	Icam1
0.1489	53.93	45.7	2.353e-25	0.5533	Tsc22d2
0.1489	87.83	80.36	6.612e-17	0.5469	Arid1b
0.1488	41.01	28.22	1.499e-56	0.5701	Erf
0.1486	73.3	64.25	4.796e-23	0.5539	Ints6l
0.1485	53.35	42.28	6.609e-37	0.5633	Tspan13
0.1483	37.73	25.54	7.938e-55	0.5668	Ppp1r2
0.1481	34.48	22.63	1.212e-58	0.5663	Ndel1
0.148	46.68	37.62	1.274e-24	0.55	Ust
0.148	78.71	70.66	6.425e-21	0.5518	Map4
0.148	86.25	79.21	3.283e-20	0.5513	Jak1
0.1479	28.46	15.21	1.16e-83	0.5691	Ppp1r3b
0.1475	43.58	31.94	9.646e-47	0.5661	Cndp2
0.1474	57.3	47.48	3.089e-31	0.5598	Dlgap4
0.1473	92.1	85.36	3.387e-16	0.546	Rere
0.1466	71.95	63.15	4.644e-22	0.5526	Rhoq
0.1463	85.23	77.6	1.388e-19	0.5505	Rock2
0.1459	25.86	11.86	5.145e-108	0.5719	Epha2
0.1456	23.98	11.4	4.533e-92	0.565	Gm10138
0.1456	70.81	61.93	4.08e-20	0.5501	Disc1
0.1454	64.99	55.39	1.973e-32	0.5627	Cd37
0.1451	37.2	26.7	1.013e-43	0.5603	Ripk2
0.1451	54.75	44.54	7.846e-35	0.5622	Slc3a2
0.1448	26.32	13.59	4.276e-84	0.5663	Gm12905
0.1445	30.24	18.58	2.211e-57	0.5612	Gm26992
0.1445	55.13	46.13	5.684e-28	0.5561	Tra2a
0.1444	75.61	66.99	8.553e-22	0.5527	B4galt1
0.1442	24.63	13.65	4.794e-66	0.5585	Smim3
0.1441	65.11	56	2.839e-27	0.5576	Ifnar2
0.1433	80.11	70.83	2.9e-18	0.5484	Uvrag
0.1432	57.36	48.61	2.636e-23	0.5518	Tspan7
0.1431	87.89	80.77	1.312e-18	0.5493	Ankrd11
0.1428	61.54	51.54	3.17e-24	0.5535	Rffl
0.1428	62.09	54.22	6.538e-20	0.5488	Prkch
0.1427	64.26	54.87	1.491e-25	0.5555	Rapgef6
0.1424	72.1	63.51	8.968e-20	0.5498	Cask
0.1423	75.55	66.82	1.671e-20	0.5511	Eml4
0.1421	84.24	76.54	9.852e-16	0.5452	Gna12
0.1419	92.69	87.35	6.34e-21	0.5524	P2ry13
0.1418	81.92	73.23	4.659e-20	0.5509	Grb2
0.1416	37.38	26.22	5.466e-48	0.5629	Slc15a4
0.1416	56.98	46.13	3.146e-34	0.5622	Tifab
0.1408	98.45	94.53	7.392e-15	0.5441	Pip4k2a
0.1405	16.91	3.18	2.744e-244	0.5691	Ier2
0.1402	58.2	48.94	3.024e-26	0.5551	Raly
0.1401	48.14	37.67	1.531e-36	0.5611	Brd2
0.1401	59.9	50.37	1.426e-25	0.5547	Nlrp1c-ps - ENSMUSG00000092528
0.1401	79.91	73.33	2.212e-13	0.5415	Bbs9
0.14	32.49	21.47	9.164e-48	0.5586	Trp53cor1
0.1398	53.99	43.98	3.658e-33	0.5605	1700017B05Rik
0.1396	67.07	58.07	3.069e-23	0.5534	Vgll4
0.1394	18.75	5.357	1.938e-171	0.568	Tlcd2
0.1392	34.66	22.48	9.23e-57	0.5651	Dusp3
0.1391	76.28	67.49	3.273e-23	0.5544	Npc2
0.139	85.29	77.76	6.354e-14	0.5425	Man1a
0.1387	50.51	40.69	1.529e-26	0.5531	Eya4
0.1386	59.99	51.11	2.838e-23	0.5523	Spop
0.1383	43.05	32.78	3.405e-36	0.5585	Dclre1c
0.1383	41.36	31.5	1.437e-29	0.5522	Ctnnd2
0.1383	58.73	49.43	1.03e-27	0.5567	Tet2
0.1382	55.98	48.78	3.023e-20	0.5482	Mfhas1
0.1379	25.91	14.14	1.7e-72	0.5623	Arl5b
0.1379	83.27	76.29	5.407e-21	0.5522	Cap1
0.1375	36.38	24.38	1.394e-51	0.5638	Cln8
0.1368	60.37	50.97	1.681e-27	0.5568	Aff4
0.1364	52.12	41.59	2.989e-33	0.5598	Soat1
0.1363	80.61	73.82	1.353e-19	0.5503	Havcr2
0.1362	99.71	98.45	4.252e-26	0.5586	Epb41l2
0.1355	88.13	80.92	4.436e-12	0.5396	Camk2d
0.1353	73.35	65.06	1.972e-19	0.5495	Slmap
0.135	100	98.41	3.084e-13	0.5416	Elmo1
0.1349	45.6	36.03	8.408e-28	0.5526	Ston2
0.1346	92.89	88	9.635e-18	0.5482	Rnase4
0.1345	42.23	32.1	4.293e-35	0.5572	Dcakd
0.1345	48.32	39.25	4.439e-29	0.555	Nfya
0.1341	25.94	14.33	6.887e-70	0.5614	Slbp
0.1341	94.09	87.17	2.771e-08	0.5327	Fgfr2
0.1339	82.51	75.79	7.799e-20	0.5507	Hspa8
0.1339	78.71	71.31	1.963e-15	0.5445	Ptk2b
0.1339	81.9	74.81	1.276e-12	0.5403	Zcchc7
0.1338	82.63	74.34	3.741e-18	0.5485	Irf8
0.1337	62.8	53.92	8.089e-27	0.5567	Irf5
0.1336	77.8	70.49	2.73e-14	0.5427	Rnf180
0.1333	49.66	41.38	1.352e-20	0.5468	Tspan18
0.1331	64.23	55.35	1.706e-18	0.5472	Cdk6
0.133	60.05	50.43	3.748e-23	0.552	Rgl1
0.1328	55.81	45.42	1.71e-25	0.5534	Klf7
0.1327	47.09	36.26	1.147e-36	0.5606	Nfic
0.1326	13.83	3.256	7.42e-158	0.5535	Adamts1
0.1325	84.38	77.52	2.427e-10	0.5365	Pitpnc1
0.1321	73.47	64.59	1.757e-19	0.5496	Mknk1
0.1321	87.57	79.79	4.618e-13	0.5412	Nek7
0.1318	99.77	98.26	3.466e-27	0.5598	Macf1
0.1318	58.82	49.65	9.073e-25	0.5536	Dhx9
0.1317	33.78	23.58	3.62e-43	0.5575	Gas5
0.1315	86.17	78.23	2.466e-12	0.54	Myo1f
0.1311	29.01	17.49	3.843e-60	0.5613	Jup
0.1308	95.61	91.14	3.653e-16	0.546	Cyfip1
0.1304	35.54	24.85	2.353e-42	0.558	B3gnt2
0.1301	48.96	38.61	5.908e-29	0.5548	Il1rl2
0.1301	75.93	67.29	4.377e-18	0.548	Cflar
0.1299	32.73	22.83	9.641e-40	0.5545	Chka
0.1299	73.82	65.64	1.333e-17	0.5472	Rap1a
0.1299	87.22	81.73	9.408e-12	0.5391	Ppp1r9a
0.1298	32.93	21.54	2.402e-52	0.5615	Myo1c
0.1298	92.28	87.37	1.306e-15	0.5452	Glul
0.1295	64.2	56.13	1.203e-17	0.5462	Smg6
0.129	61.51	54	4.632e-17	0.5451	Pacs1
0.1289	86.37	79.79	5.344e-12	0.5394	Cmip
0.1287	21.94	10.1	1.15e-89	0.5611	Coq10b
0.1287	57.41	48.01	4.4e-26	0.5547	Acox3
0.1286	57.33	48.52	8.187e-20	0.5477	Bcor
0.1285	50.42	40.99	1.498e-29	0.5561	Marchf7
0.1285	60.81	51.28	7.9e-25	0.5541	Ube2d3
0.1284	64	56.49	3.367e-22	0.5519	Bach1
0.1282	83.39	77.64	7.511e-13	0.5408	Fam172a
0.1281	18.6	5.795	1.092e-147	0.5645	Tex14
0.128	89.62	83.4	1.433e-11	0.5388	Cux1
0.1277	49.84	39.07	9.22e-34	0.5594	Hnrnpab
0.1274	72.68	66.08	3.409e-15	0.5438	Slc1a3
0.1273	74.06	66.11	8.576e-19	0.5488	Med12l
0.127	56.1	45.13	2.453e-28	0.5563	H2-K1
0.1269	28.9	16.17	1.76e-71	0.5652	Atf4
0.1268	48.58	40.39	4.222e-23	0.5493	Senp7
0.1266	65.81	56.52	5.37e-21	0.5505	Crlf3
0.1266	76.78	69.61	4.947e-13	0.5407	Msi2
0.1265	30.8	20.8	4.217e-42	0.5543	Birc3
0.1265	60.72	51.99	3.258e-22	0.5512	Tm6sf1
0.1265	81.25	73.95	9.91e-17	0.5465	Hnrnpu
0.1264	34.28	23.47	5.195e-39	0.5546	Gm47283
0.1261	43.64	33.6	5.412e-29	0.5527	Gm40841
0.1261	45.07	36.1	1.731e-27	0.5523	Klhl6
0.126	52.3	43.37	2.759e-26	0.5536	Ythdc1
0.1259	33.34	22.21	7.561e-48	0.5594	Spty2d1
0.1256	21.97	10.35	6.595e-85	0.5599	4933421O10Rik
0.1255	48.11	39.26	6.201e-28	0.5539	Ywhag
0.1253	99.74	97.96	6.341e-12	0.5394	Srgap2
0.1252	41.15	31.34	1.241e-33	0.5556	Atp6v0d1
0.1251	44.84	36.48	2.346e-25	0.5503	Sall3
0.1251	96.26	92.06	7.051e-05	0.5248	Nav3
0.125	27.79	17.74	9.627e-46	0.5534	Mrps6
0.125	67.21	58.23	4.839e-21	0.5508	Rbm5
0.1249	45.04	34.98	1.579e-34	0.5582	Hnrnpa1
0.1249	69.73	64.32	1.53e-11	0.538	Nos1ap
0.1244	44.98	35.81	4.751e-29	0.5537	Swap70
0.1243	26.29	16.04	1.486e-51	0.5547	Paqr7
0.1242	32.76	21.97	9.796e-47	0.5584	Morf4l2
0.124	34.95	25.53	5.11e-32	0.5507	A330023F24Rik
0.124	66.66	59.57	1.69e-11	0.5375	Bank1
0.1237	47.38	38.22	8.339e-28	0.5534	Gxylt1
0.1232	64.02	55.36	3.067e-23	0.553	Csnk1e
0.123	58.85	50.17	1.403e-22	0.5513	Ddi2
0.1229	65.93	57.36	4.509e-17	0.5456	Ubac2
0.1227	92.75	87.32	1.754e-09	0.5351	Ppp3ca
0.1226	25.42	14.57	2.884e-59	0.5567	Map3k8
0.1225	73.59	67.27	1.804e-13	0.5413	Exoc6b
0.1224	77.77	70.37	1.145e-14	0.5433	App
0.1222	16.93	4.405	1.8e-171	0.5631	ENSMUSG00000120030
0.1221	76.1	68.73	3.077e-14	0.5426	Col27a1
0.122	60.89	53.45	3.388e-19	0.5478	Fbxw11
0.1218	64.61	55.21	6.178e-20	0.549	Taf15
0.1217	51.3	41.82	9.673e-27	0.5536	Crk
0.1217	44.66	35.92	9.45e-24	0.5485	Arsg
0.1216	26.18	14.64	1.268e-64	0.5595	H2-Q4
0.1215	40.63	30.99	4.556e-32	0.5541	Tifa
0.1215	51.95	41.72	3.378e-28	0.5551	Actg1
0.1215	40.04	32.77	8.199e-19	0.5419	Gm26740
0.1212	31.18	20.27	1.9e-47	0.5573	Mtmr10
0.1212	74.93	68.23	4.407e-14	0.5423	Tlr7
0.1212	79.67	73.36	4.131e-12	0.5394	Gng2
0.1211	15.27	3.069	2.47e-205	0.5614	Egr2
0.1211	18.08	6.279	5.215e-122	0.5598	Id2
0.1211	77.27	69	3.389e-14	0.5425	Abi1
0.121	18.81	6.793	1.013e-118	0.5608	2810013P06Rik
0.1206	51.07	42.89	3.355e-21	0.548	Gse1
0.1206	81.16	74.74	6.04e-14	0.5424	Rtn4
0.1202	75.87	68.3	3.325e-16	0.5454	Sfpq
0.1202	77.92	70.6	6.452e-11	0.5373	Atxn7l1
0.1201	35.3	24.79	2.399e-40	0.5565	Themis2
0.1201	99.94	98.41	4.712e-16	0.5459	Zfhx3
0.1201	57.44	50.38	1.13e-15	0.5426	Bcl2l1
0.1201	96.11	92.21	7.684e-13	0.541	Abhd12
0.1201	78.39	71.89	2.608e-11	0.538	Phf21a
0.1201	87.69	79.92	1.38e-08	0.5332	Tmem135
0.12	64.43	56.16	7.922e-20	0.549	Pitpna
0.1198	24.07	13.55	1.059e-59	0.5553	Lbh
0.1197	49.75	40.97	1.518e-24	0.5511	Coro7
0.1195	47.88	38.82	4.917e-26	0.5519	Gtf2a1
0.1195	99.77	97.52	2.487e-05	0.526	Tanc2
0.1194	35.16	25.92	1.017e-32	0.5515	Ube2f
0.1194	95.76	90.09	1.039e-06	0.5294	Celf2
0.1192	57.41	47.74	1.099e-24	0.5531	Hnrnpa3
0.1192	61.83	54.25	4.013e-16	0.5439	Mrtfa
0.119	67.97	60.34	4.638e-17	0.5459	Senp2
0.1189	30.24	19.6	2.048e-48	0.5571	Myadm
0.1189	22.84	18.05	3.502e-11	0.526	Nhs
0.1186	20.94	12.16	4.445e-46	0.5463	Csf1
0.1185	47.5	38.44	1.035e-27	0.5534	Vasp
0.1184	91.2	85.63	1.347e-12	0.5405	Msn
0.1183	66.92	58.17	8.199e-19	0.548	Zbed6
0.1179	65.34	56.93	6.251e-19	0.548	Gna13
0.1176	21.91	14.8	8.733e-26	0.537	Ube2e2
0.1174	93.51	87.72	1.445e-07	0.5312	Tbc1d5
0.1173	40.77	31.59	9.758e-29	0.5514	Zfp516
0.1173	95.38	91.57	4.436e-14	0.5429	Kctd12
0.1172	27.41	17.06	1.808e-49	0.5548	Arf2
0.1172	87.98	80.26	8.151e-08	0.5317	Trio
0.1171	15.38	3.76	6.775e-167	0.5585	Tnf
0.1169	31.24	21.02	1.115e-41	0.5542	Tlr2
0.1165	69.11	62.21	1.963e-13	0.5409	Mbd5
0.1164	18.02	6.687	1.537e-108	0.5575	H1f4
0.1161	65.14	56.36	1.468e-18	0.5474	Chd4
0.116	78.59	73.37	7.709e-10	0.5354	Snx24
0.1158	16.44	5.332	3.247e-123	0.5563	2010013B24Rik
0.1157	35.62	26.15	6.479e-34	0.5527	Clk4
0.1157	50.54	43.06	1.738e-15	0.5409	Sncaip
0.1157	69.61	63.6	5.796e-11	0.5369	Babam2
0.1156	62.94	54.08	6.444e-21	0.55	Ptpn6
0.1156	88.18	81.34	4.212e-08	0.5323	Sh3kbp1
0.1154	67.62	59.43	6.831e-17	0.5456	Ncl
0.1152	26.53	15.93	4.554e-53	0.5554	Midn
0.1151	58.58	53.22	1.517e-10	0.5352	Cradd
0.1145	71.13	64.85	1.835e-16	0.5455	Pla2g15
0.1136	67.97	62.18	6.176e-11	0.5368	Fars2
0.1135	24.51	14.44	3.834e-52	0.5529	Irf1
0.1132	65.11	58.15	1.731e-17	0.5462	Clta
0.1131	60.02	53.23	7.021e-17	0.5447	Pcmtd1
0.1131	57.59	51.42	1.021e-11	0.5369	Nsmce2
0.113	74.9	67.3	1.486e-12	0.5399	Dapp1
0.1128	94.56	89.27	2.192e-09	0.5349	Lair1
0.1127	34.28	24.85	5.82e-34	0.5518	Napa
0.1126	64.58	56.1	1.042e-18	0.5476	Ewsr1
0.1126	65.28	57.43	4.098e-18	0.547	Rab1a
0.1125	95.88	90.87	7.343e-06	0.5273	Ankrd44
0.1124	71.31	63.67	3.242e-16	0.5451	Snrnp70
0.1123	65.75	58.32	2.462e-17	0.5461	Camk1
0.1118	71.45	64.79	2.824e-13	0.5408	Dyrk1a
0.1116	18.16	9.182	1.511e-58	0.5468	Tiparp
0.1116	34.78	25.73	2.817e-30	0.5494	Zfp69
0.1115	70.43	62.7	1.632e-16	0.5454	Arrb2
0.1113	87.28	81.48	1.588e-08	0.5331	Specc1
0.1112	57.21	49.37	1.901e-18	0.5461	Top1
0.1105	35.51	27.15	1.238e-25	0.5462	Rybp
0.1105	86.63	81.11	5.162e-10	0.536	Mtus1
0.1105	59.87	55.74	4.668e-09	0.5328	Dip2c
0.1104	28.52	20.13	9.492e-30	0.5449	Sertad2
0.1099	14.71	3.387	3.313e-171	0.5571	H2-K2 - ENSMUSG00000067203
0.1099	62.27	54.59	1.739e-18	0.5471	Cd300c2
0.1097	80.81	74.4	6.399e-13	0.5408	Calm2
0.1095	41.56	32.59	2.529e-25	0.5487	Tom1l1
0.1095	86.22	80.03	7.299e-12	0.5392	Tpm3
0.1094	25.59	15.57	1.781e-47	0.5519	Nsun6
0.1094	23.69	14.62	2.511e-40	0.5465	Sfmbt2
0.1094	43.14	34.59	2.598e-23	0.5475	Usp35
0.1094	66.28	61.19	1.067e-08	0.5326	Phactr2
0.1093	69.52	63.19	2.112e-12	0.5393	Foxo3
0.1093	91.37	84.7	6.421e-07	0.5298	Pik3ap1
0.1092	27.11	18.51	4.972e-33	0.5459	Msh5
0.1091	72.83	66.54	1.402e-11	0.5382	Whrn
0.1089	35.92	26.71	8.258e-32	0.5513	Nxf1
0.1089	94.18	89.34	3.698e-10	0.5363	Cttnbp2nl
0.1089	83.97	76.96	1.427e-08	0.5331	Nf1
0.1088	55.25	47.6	6.724e-16	0.5425	Stambpl1
0.1088	93.65	88.7	2.053e-11	0.5385	Srrm2
0.1082	14.62	4.263	3.624e-127	0.5524	Pmaip1
0.1082	29.95	20.87	6.852e-35	0.5494	Tal1
0.1081	19.16	8.411	1.84e-83	0.5546	Hmgb2
0.1081	30.59	21.73	6.534e-33	0.5486	Ercc5
0.108	75.31	68.6	1.331e-10	0.5366	Rtn3
0.1077	13.04	2.293	7.43e-198	0.554	Klf4
0.1077	44.72	36.44	5.466e-21	0.5457	Ahdc1
0.1076	75.43	69.01	5.022e-09	0.5337	Tmem164
0.1075	42.47	33.29	4.196e-27	0.5507	Usp22
0.1071	96.58	92.4	5.125e-06	0.5277	Rreb1
0.107	65.34	57.64	7.701e-16	0.5439	Ythdf3
0.1069	13.19	2.348	9.81e-198	0.5545	Ier3
0.1068	58.73	50.61	4.412e-15	0.5419	Elf2
0.1067	52.68	43.32	6.275e-23	0.5501	Eif1
0.1066	80.9	74.98	2.409e-12	0.5399	Snx5
0.1064	78.47	72.17	4.742e-10	0.5358	Irf2
0.1063	34.31	26.62	8.846e-22	0.5422	Rcan1
0.1063	99.65	97.37	1.053e-07	0.5315	Pag1
0.1062	43.96	35.42	1.237e-22	0.5471	Arid3b
0.1061	40.83	33.72	7.431e-19	0.5423	Slc49a4
0.106	41.88	33.34	1.06e-20	0.5443	Hivep1
0.106	45.04	37.31	1.937e-20	0.5454	Gm44860
0.1057	75.11	68.24	1.646e-12	0.5398	Kif21b
0.1057	70.43	64.74	7.578e-10	0.535	Tbl1x
0.1056	61.95	54.41	3.307e-14	0.5412	Acsl4
0.1055	98.42	94.63	1.648e-06	0.5289	Cyrib
0.1053	41.12	33.99	1.546e-19	0.5432	Pdcd4
0.1052	28.37	18.75	2.07e-39	0.5505	Dnajb9
0.1051	21.99	13.27	1.339e-42	0.546	Stk38l
0.1051	89.03	84.52	1.391e-11	0.5388	Lcp1
0.105	18.19	9.122	1.237e-58	0.5467	Jdp2
0.105	26.18	16.9	2.042e-40	0.5492	Slc31a1
0.1049	34.4	26.08	1.243e-25	0.5456	Tent5a
0.1048	58.64	50.77	2.603e-17	0.5449	Etnk1
0.1048	78.33	70.15	6.099e-09	0.5336	Arhgap17
0.1047	23.05	13.97	7.63e-43	0.5471	E330020D12Rik
0.1047	49.93	41.19	1.339e-19	0.5456	Kdm6a
0.1047	52	44.35	1.721e-17	0.5439	Mideas
0.1046	58.29	50.03	2.286e-19	0.5474	Sf1
0.1046	62.33	55.5	1.586e-15	0.5432	Hdlbp
0.1041	75.23	67.87	2.529e-10	0.5361	Ubl3
0.1039	47.09	38.3	2.663e-23	0.5489	Saraf
0.1039	33.31	25.57	1.204e-21	0.5415	Rbpms
0.1035	34.37	25.52	2.976e-30	0.5492	Trir
0.1033	54.11	46.63	1.533e-18	0.5457	Prpf38b
0.1033	66.34	58.79	1.902e-14	0.5421	Mdm4
0.1032	98.3	95.02	1.994e-07	0.5309	Picalm
0.1031	81.31	74.25	7.761e-10	0.5355	Ptbp3
0.103	91.14	85.67	3.269e-05	0.5257	Arhgap22
0.1029	58.35	50.12	6.057e-16	0.543	Dgkz
0.1027	53.17	45.17	1.555e-14	0.5401	Arid5b
0.1027	60.98	55.7	3.623e-10	0.5348	Rsrc1
0.1026	71.04	63.53	3.088e-14	0.5422	Rsrp1
0.1026	81.87	73.63	5.939e-07	0.5297	Dnmt3a
0.1024	42.47	33.86	4.202e-24	0.548	Trim8
0.1022	20.44	10.61	2.79e-61	0.5509	Nfkbib
0.102	72.57	65.47	6.712e-12	0.5387	Daglb
0.1016	95	90.86	6.959e-09	0.5339	Smap2
0.1015	19.48	11.98	1.564e-34	0.5396	Slc15a2
0.1015	32.06	23.04	5.784e-29	0.5465	Pde4b
0.1014	15.88	6.38	8.904e-83	0.5486	Nabp1
0.1012	32.99	24.47	1.114e-25	0.5447	Alox5
0.1011	72.83	65.51	4.619e-11	0.5372	Atp6v0a1
0.101	42.61	34.93	4.661e-20	0.5441	Gpcpd1
0.101	52.27	44.37	1.543e-17	0.5439	Arhgap4
0.1009	14.74	4.137	2.819e-133	0.5533	Tuba1c
0.1009	31.44	23.22	1.169e-26	0.5447	A930015D03Rik
0.1006	34.25	26.46	3.574e-20	0.5406	Slc16a10
0.1004	40.66	32.85	3.795e-22	0.5455	Hnrnpdl
0.1004	54.28	45.95	2.247e-18	0.5453	Ddx39b
0.1001	20.21	10.23	8.401e-63	0.5508	2410006H16Rik
0.1	73.24	65.99	1.052e-10	0.5367	Prkcd
0.09998	48.84	41.85	1.892e-16	0.5419	Cd300a
0.09995	49.11	41.88	8.762e-17	0.5423	Bhlhe41
0.09979	34.4	25.83	1.619e-27	0.5471	Etv3
0.09938	24.92	16.18	1.431e-37	0.5466	Bcl10
0.09907	51.13	43.54	1.048e-15	0.5413	Lpgat1
0.09888	85.05	78.63	5.03e-08	0.5321	Pros1
0.09882	85.73	78.48	4.289e-05	0.5253	Tbc1d22a
0.09872	39.72	32.18	3.639e-19	0.5421	Cyria
0.09867	15.03	4.843	1.321e-112	0.5515	Spry1
0.09865	79	72.11	2.147e-09	0.5346	Ptp4a2
0.09863	77.77	72.31	4.168e-06	0.5277	Bach2
0.09857	16.96	7.59	1.215e-70	0.5479	Gm15441
0.09847	29.95	21.54	1.031e-27	0.5444	Tnfsf13b
0.09846	26.41	18.21	1.336e-30	0.5439	Kcnj2
0.09828	17.02	7.343	1.305e-75	0.549	H1f2
0.09826	59.87	52.8	1.352e-13	0.54	Slc23a2
0.09821	56.51	48.57	6.489e-16	0.5427	Mef2d
0.09794	49.72	42.92	7.162e-17	0.5427	Srsf11
0.09792	20.09	10.95	8.079e-52	0.5472	Nfkb2
0.09791	84.18	78.2	4.031e-07	0.5301	Arhgap39
0.09782	37.26	29.4	2.728e-22	0.5442	Piezo1
0.09771	39.75	31.67	1.931e-22	0.5454	Ccng2
0.09771	91.58	85.87	0.0001721	0.5237	0610040J01Rik
0.09692	57.3	50.57	2.112e-12	0.5379	Snx30
0.09685	23.46	14.05	1.48e-45	0.5488	Atp6v0c
0.09685	32.03	24.02	4.369e-25	0.5438	Rheb
0.09684	56.98	49.65	2.517e-16	0.5434	Hnrnpl
0.0968	29.51	20.55	1.094e-32	0.5475	Zfp729a
0.09643	76.89	69.9	1.281e-08	0.533	Wdr26
0.09634	35.48	27.59	1.721e-22	0.5435	Sptan1
0.09623	63.21	56.13	1.629e-13	0.5404	Hps4
0.09618	76.81	69.73	1.656e-07	0.5307	Pnpla7
0.09616	17.29	8.235	1.504e-61	0.546	Gm37168
0.09612	29.57	20.27	3.665e-34	0.5484	Mob3a
0.0961	75.55	69.05	2.081e-08	0.5325	Rcbtb2
0.09602	56.48	49.38	1.166e-13	0.5396	Zc3h7a
0.09598	79.88	74.34	2.322e-09	0.5346	Lnpep
0.09595	64.9	57.1	4.012e-09	0.5331	Apbb2
0.09588	61.36	54.51	4.036e-13	0.5395	Ptpre
0.09576	10.27	3.054	3.371e-85	0.5365	Il1b
0.09576	16.03	6.567	4.243e-79	0.548	Phkg1
0.0956	34.6	25.71	1.026e-27	0.5473	Hhex
0.0956	64.61	57.73	3.035e-12	0.5386	Actr3
0.09554	17.75	8.214	1.664e-67	0.5483	Gimap6
0.09552	41.88	35.61	3.491e-12	0.5344	Fggy
0.0955	91.52	85.28	0.0001223	0.5242	Mycbp2
0.09545	26.38	18.44	2.618e-29	0.5431	Vamp1
0.09498	26.21	17.2	1.06e-36	0.5472	Pcna
0.09478	93.39	88.58	5.999e-07	0.5299	Wasf2
0.09455	72.8	65.71	4.849e-09	0.5336	Hck
0.09452	37.53	29.22	3.038e-23	0.545	Trafd1
0.09446	25.3	17.38	2.628e-29	0.5421	Tasl
0.09441	96.55	92.22	0.0001194	0.5242	Hpgds
0.09403	74.44	69.3	4.982e-07	0.5297	Fto
0.09395	60.51	53.37	6.541e-14	0.5406	Nmt1
0.09385	80.7	76.31	2.505e-05	0.5259	Ank2
0.09379	70.08	63.81	3.893e-11	0.5372	Pafah1b1
0.09349	54.64	47.21	2.691e-14	0.5402	Abcc5
0.09341	30.54	22.72	1.407e-25	0.5434	Hdac1
0.09329	47.91	40.89	1.79e-15	0.5404	Dnajb6
0.09327	84.85	78.72	9.64e-06	0.527	Slc12a6
0.09326	54.28	52.63	0.0007558	0.5207	Immp2l
0.09317	47.35	41.51	1.331e-10	0.5334	Tnfaip8
0.09297	32.49	24.78	1.8e-23	0.5428	Tbc1d10a
0.09287	20.62	11.69	2.553e-47	0.5462	Vamp2
0.09282	23.93	15.53	7.192e-36	0.5448	Rbm3
0.09277	12.61	3.422	4.103e-118	0.5461	ENSMUSG00000120869
0.09249	13.07	4.274	2.649e-94	0.5444	Gch1
0.09246	76.1	70.43	2.263e-06	0.5282	8030442B05Rik
0.09228	49.61	42.14	1.606e-16	0.5421	Rassf5
0.09227	21.79	12.44	1.339e-47	0.5476	Ppp1r11
0.09225	72.77	65.9	5.137e-08	0.5316	Tet3
0.09205	17.52	8.87	1.365e-54	0.5445	Rassf1
0.09177	78.94	72.65	4.452e-07	0.5299	Nfkb1
0.09174	22.05	14.25	3.594e-33	0.5415	Slc2a1
0.09173	12.17	3.104	4.849e-124	0.5457	Ube2s
0.09155	46.12	38.95	1.767e-16	0.5412	Usp2
0.09139	70.93	64.02	3.774e-09	0.5337	Elk3
0.09125	71.04	64.61	1.669e-09	0.5344	Tnpo1
0.09103	29.92	22.41	3.954e-23	0.541	Mtmr12
0.09099	84.15	78.26	2.091e-06	0.5285	Abi3
0.09086	27.29	20.41	2.971e-20	0.537	ENSMUSG00000120992
0.09086	75.14	68.78	5.898e-07	0.5295	Snx13
0.09085	14.83	6.108	1.013e-72	0.5445	Slc25a33
0.09085	60.08	56.36	3.692e-06	0.5269	Bcas3
0.09081	58.91	52.02	3.065e-12	0.5378	Ogt
0.09076	19.42	10.86	5.256e-46	0.5442	Nt5dc3
0.09073	24.74	16.87	3.001e-30	0.5423	Tnip2
0.09071	47.5	40.7	2.745e-14	0.5387	Pnpla8
0.09064	83.71	76.92	8.68e-05	0.5245	Pld1
0.09058	39.16	30.9	3.237e-21	0.5438	Ubb
0.09032	28.02	19.81	2.892e-28	0.5435	Zyx
0.09029	94.27	90.21	0.0001182	0.5242	Zfp710
0.09007	56.39	49.83	6.876e-11	0.5353	Sgms1
0.09	55.54	48.58	1.283e-12	0.5379	Nckap5l
0.08996	41.39	33.65	5.765e-19	0.5424	Zfp62
0.08995	12.46	4.218	7.481e-85	0.5416	Cdkn1a
0.08989	48.08	41.07	9.228e-14	0.5381	Ralgps2
0.08985	37.12	29.34	7.743e-21	0.5426	Wdfy1
0.08967	44.69	37.5	1.549e-16	0.5408	Gramd1a
0.08943	64.32	58.45	9.209e-09	0.5325	ENSMUSG00000120400
0.08942	60.98	55.97	1.54e-07	0.5299	Tmcc1
0.08923	61.68	55.04	2.256e-12	0.5384	Gmip
0.08916	34.22	27.05	1.818e-17	0.5379	Lsp1
0.08899	14.45	6.632	4.027e-56	0.54	Clic4
0.08888	12.37	3.639	6.207e-104	0.5439	Gm15726
0.08882	72.83	66.54	8.232e-07	0.5291	Map3k5
0.08863	45.57	42.01	1.726e-06	0.526	Kcnq1ot1
0.08858	19.22	10.81	3.155e-45	0.5437	Nfkbie
0.08858	17.55	9.842	3.767e-41	0.54	Nasp
0.08846	35.71	29	1.378e-15	0.5366	Abcb1b
0.08841	22.4	14.38	4.135e-34	0.5423	Mob3c
0.08803	57.27	52.78	1.799e-06	0.5273	Fmnl2
0.088	64.67	58.25	6.777e-09	0.5328	Sfmbt1
0.0879	49.17	43.94	1.396e-10	0.5338	Zfp609
0.08776	17.49	10.15	1.011e-36	0.5382	Bag3
0.08771	19.22	10.49	2.425e-48	0.5447	Sde2
0.08771	22.61	14.79	2.701e-32	0.5416	Gde1
0.08769	37.96	31.31	9.33e-17	0.5389	Orai1
0.08765	85.81	79.81	0.001453	0.5209	Mitf
0.08764	27.79	20.4	1.465e-21	0.5382	Cmtm8
0.08753	51.07	44.75	2.486e-12	0.5368	Slc40a1
0.0875	31.82	24.35	1.69e-21	0.5407	Trp53bp2
0.08742	36.27	29.25	1.716e-18	0.5401	Tmem64
0.08737	37.23	30.69	1.542e-15	0.5372	Gclc
0.08726	28.2	19.92	1.255e-28	0.5438	Zfp869
0.08717	44.22	36.48	1.998e-16	0.5404	Cd34
0.08709	68.79	63.23	2.712e-07	0.5299	Gm5086
0.08689	40.89	34.64	1.755e-14	0.5373	4632427E13Rik
0.08689	83.88	80.18	0.000256	0.5232	Agmo
0.08668	23.02	15.48	1.118e-28	0.5398	Eif1a
0.08659	48.52	42.15	1.806e-12	0.5364	Rubcnl
0.08651	44.63	37.96	9.846e-14	0.5372	Neurl1a
0.08634	71.98	65.67	9.03e-08	0.5311	Ppp2r5c
0.08629	21.15	12.71	1.73e-39	0.5435	Rnf34
0.08627	47.56	41.37	2.108e-13	0.5376	BC005537
0.08626	24.6	16.48	6.326e-32	0.5431	Cdkn1b
0.08605	13.89	5.261	7.034e-79	0.5437	Taf13
0.08603	84.85	79.56	0.001369	0.521	P3h2
0.08601	49.69	42.74	4.606e-14	0.5389	Zscan26
0.0857	8.921	0.7207	1.088e-225	0.5411	Egr3
0.0857	31.15	23.31	3.044e-23	0.5417	Amz1
0.08562	12.93	4.682	2.449e-79	0.5418	Odc1
0.08561	39.28	31.6	7.794e-19	0.5415	Xbp1
0.08559	52.21	45.5	9.353e-13	0.5376	Stau1
0.08548	29.34	22.21	2.303e-21	0.5392	Chaserr
0.08517	34.89	28.01	4.412e-17	0.5379	Ap1s2
0.08494	12.9	6.763	6.478e-36	0.5318	Serpine1
0.08482	74.41	68.95	9.16e-06	0.5267	Tcf12
0.08464	17.58	9.248	2.661e-48	0.5424	Marcksl1
0.0846	14.04	5.634	1.773e-71	0.5426	Osm
0.08445	50.39	44.1	2.293e-11	0.5351	Rassf4
0.08422	61.54	54.06	4.558e-11	0.5362	Lmo2
0.0842	18.37	10.26	1.087e-42	0.5415	Gtf2b
0.08386	36.88	29.9	1.158e-16	0.5383	Plekhm2
0.0837	57.41	51.21	1.941e-11	0.5364	Tlr13
0.08357	44.72	38.63	6.285e-12	0.5348	Heca
0.08345	44.31	39.75	1.35e-06	0.5258	Enox2
0.08344	70.69	65.31	1.674e-08	0.5325	Usp8
0.08339	17.96	10.44	1.317e-37	0.5391	Arid5a
0.0833	57.56	52.5	1.372e-07	0.5297	Zfp608
0.08328	65.75	60.05	5.236e-07	0.5291	Tnfrsf11a
0.08309	15.06	7.071	4.352e-55	0.5407	Fosl2
0.08288	66.07	60.2	3.132e-08	0.5317	Gspt1
0.08284	75.78	69.77	7.505e-06	0.527	Atp2b1
0.08278	54.49	47.39	6.953e-12	0.5366	Ranbp2
0.08277	28.4	21.6	6.509e-19	0.5365	Gm31166
0.08232	33.75	26.35	3.109e-20	0.5405	Scpep1
0.08226	42.59	35.66	9.133e-15	0.538	Ube2b
0.08222	42.5	35.43	8.313e-16	0.5392	Rab5a
0.08216	75.61	69.19	2.637e-06	0.528	Pik3cd
0.08215	43.11	36.06	2.405e-15	0.5389	Cebpa
0.08214	37.99	30.73	8.627e-17	0.5388	Csnk1g3
0.08213	38.49	32.34	1.388e-13	0.5353	P2rx4
0.0821	26.94	19.63	4.725e-23	0.539	Txnrd1
0.08207	54.61	49.77	2.963e-07	0.5287	Nedd4l
0.08202	38.7	32.12	4.048e-15	0.5372	Ehbp1l1
0.08201	53.58	47.6	3.317e-11	0.5355	Atp6v1c1
0.08197	33.81	25.78	2.146e-21	0.5414	Gpx1
0.08152	59.9	53.2	1.584e-09	0.5334	Nfat5
0.08148	48.14	42.13	1.08e-10	0.5337	Traf5
0.08143	68.21	63.56	1.222e-06	0.5285	E2f3
0.08139	85.41	79.04	9.027e-05	0.5245	Bin2
0.0813	99.36	96.93	0.0007275	0.5219	Lyn
0.0811	20.42	14.36	1.615e-19	0.5317	Lrguk
0.08091	33.14	26.42	6.092e-17	0.537	Snx20
0.08082	21.03	13.26	5.264e-33	0.5403	Ube2a
0.08057	65.49	60.64	3.366e-06	0.5273	Tcf20
0.08049	30.24	23.49	1.408e-18	0.5373	Cep43
0.08047	46.74	39.66	2.343e-14	0.5386	Mapre1
0.08045	11.03	2.56	2.768e-124	0.5425	ENSMUSG00000120357
0.08037	38.64	31.46	3.454e-17	0.5395	Rnaset2a
0.08028	62.5	57.4	6.423e-07	0.5287	Itpkb
0.08027	25.5	19.01	8.593e-17	0.5328	Hivep2
0.08025	52.03	45.31	6.361e-13	0.5378	Cnbp
0.08023	28.66	23.5	2.644e-11	0.5289	Myo1e
0.08004	77.77	72.38	2.707e-05	0.5257	Tbl1xr1
0.08003	84.12	79	0.01119	0.5178	Ccnd3
0.08	16.15	7.811	5.686e-53	0.5416	Junos
0.07986	61.36	55.12	9.417e-09	0.5322	Tmem170b
0.0798	38.34	32.24	7.883e-14	0.5356	Ifnar1
0.07977	75.49	69.39	1.504e-07	0.5308	Ywhah
0.07974	55.34	49.06	7.178e-11	0.5352	Pxn
0.0796	19.48	11.96	1.739e-33	0.5389	Slc9a3r1
0.07959	21.23	13.25	1.663e-34	0.5412	ENSMUSG00000120081
0.07958	12.64	6.269	1.851e-40	0.5328	Plaur
0.07954	51.89	45.93	5.394e-10	0.5332	Exoc5
0.07934	76.63	70.61	1.539e-07	0.5308	Rhoa
0.07933	70.69	65.24	2.777e-08	0.5321	Snx18
0.07929	34.83	28.05	3.687e-16	0.5369	Cd14
0.07922	9.74	2.031	4.404e-124	0.5388	Lmna
0.07921	46.12	39.84	8.026e-12	0.535	Ubn1
0.07897	28.25	21.63	5.143e-19	0.5366	Prdx1
0.07889	43.11	36.84	1.393e-12	0.5353	Tor1aip2
0.07884	91.34	86.87	7.211e-05	0.5248	Cltc
0.07881	14.98	7.363	1.29e-47	0.5383	5033421B08Rik
0.07876	29.19	21.25	1.127e-23	0.5408	Selenok
0.07876	39.08	31.84	8.446e-17	0.5392	Ccnl2
0.07871	59.84	53.04	1.392e-10	0.5353	Hcls1
0.07839	52.88	46.84	5.932e-09	0.5315	Myo1b
0.07838	77.83	72.01	1.723e-05	0.5262	Erbin
0.07818	56.16	50.16	1.388e-10	0.5349	Ifngr2
0.07817	65.93	59.41	1.894e-07	0.53	Herc1
0.07813	36.03	29.28	2.944e-15	0.5363	Prag1
0.0781	42.53	36.29	7.712e-12	0.5341	Usp6nl
0.07809	47.73	41.09	1.521e-11	0.5348	Plgrkt
0.07807	35.3	28.93	5.619e-15	0.5358	Nhlrc3
0.07797	69.49	63.96	3.721e-06	0.5275	Fam168a
0.07796	14.86	7.751	1.62e-41	0.5364	Ccdc80
0.07792	79.64	74.6	3.676e-05	0.5254	Tspan14
0.07784	57.36	52.75	3.359e-06	0.5267	Gm26542
0.07774	59.08	52.66	8.424e-09	0.532	Slc4a7
0.07773	86.98	81.63	0.0008508	0.5217	Nipbl
0.07772	51.07	45.46	2.144e-09	0.5321	Arid4b
0.07768	80.73	74.91	4.996e-05	0.5251	Rnf13
0.0776	43.96	38.39	9.683e-12	0.5345	Prpf39
0.07758	35.95	29.57	8.272e-15	0.5359	Uhrf1bp1
0.07756	77.95	73.22	2.737e-06	0.5281	Scarb2
0.07755	10.76	2.333	7.831e-131	0.5423	Gm29282
0.07752	35.77	29.21	1.213e-14	0.5356	Tgm2
0.07752	66.66	63.42	0.0001876	0.5231	Igf1r
0.07749	48.96	44.68	1.218e-06	0.5267	Hs2st1
0.07748	12.26	4.304	1.567e-78	0.5401	Snhg1
0.07743	67.21	61.66	4.9e-06	0.527	Tcf7l2
0.07729	56.16	52.24	4.647e-06	0.5263	Znrf1
0.07726	36.71	30.29	8.209e-15	0.5362	Tox4
0.07718	18.34	11.54	5.242e-29	0.5356	Adrb1
0.07718	51.33	45.82	1.356e-07	0.5288	Rps6ka5
0.07716	13.07	5.7	2.979e-56	0.5376	Rcc1
0.07706	76.6	71.01	1.851e-05	0.5261	Ncoa3
0.07705	47.15	40.4	1.714e-12	0.5361	Zfp207
0.077	31.12	24.33	8.552e-18	0.5369	Dyrk2
0.0769	38.81	32.5	3.274e-13	0.5349	Sfi1
0.0768	74.93	67.76	1.925e-05	0.5259	Huwe1
0.07674	37	30.46	2.364e-15	0.5369	Srsf2
0.07673	80.84	75.25	0.0008175	0.5216	Extl3
0.07671	81.31	76.73	0.001498	0.5208	Lhfpl2
0.07664	22.4	15.7	9.607e-23	0.5355	Pcyt1a
0.07662	32.85	26.59	1.349e-15	0.5356	Plekhf2
0.07662	51.13	45.69	4.499e-09	0.5316	Dram2
0.07655	14.89	7.196	7.716e-51	0.5393	Gm20186
0.0765	14.92	7.328	1.084e-48	0.5387	Taf7
0.07644	75.81	69.03	2.488e-05	0.5257	Sema4d
0.0764	23.02	16.17	2.877e-23	0.5364	Nop56
0.07634	34.25	29.01	2.377e-10	0.5297	Nova1
0.0763	54.55	48.58	6.523e-11	0.5352	Morf4l1
0.07621	36.62	29.83	9.169e-15	0.536	Cops4
0.07615	21.64	15.28	2.128e-21	0.534	Gm11613
0.07613	22.73	17.35	1.224e-14	0.5294	Lonrf3
0.07599	12.02	4.667	1.899e-64	0.5372	Cfap43
0.07592	51.95	47.33	1.111e-06	0.5272	Sik3
0.0759	47.41	44.14	0.0001494	0.5218	Ppm1l
0.07583	74.64	67.19	8.949e-05	0.5242	Smg1
0.07582	42	36.8	2.912e-07	0.5266	Chst8
0.07572	51.86	46.03	2.709e-09	0.532	Lpcat3
0.07569	32.09	26.53	4.653e-12	0.5311	Tbc1d1
0.07559	22.76	15.42	1.366e-25	0.5375	Tuba1a
0.07557	43.7	37.84	7.106e-11	0.533	Myl12b
0.07548	42.15	35.14	4.664e-14	0.5369	Ipo9
0.0754	62.27	57.73	9.241e-06	0.5261	Rai1
0.0754	53.17	49.67	7.247e-05	0.5232	Hdac8
0.07537	28.46	21.43	4.025e-20	0.5376	Serf2
0.07534	41.18	35	3.496e-13	0.5356	Ube2j1
0.07528	9.652	1.834	1.508e-133	0.5391	Gm34455
0.07518	12.58	5.281	1.675e-57	0.5369	Gm9949
0.07515	59.78	54.74	8.106e-07	0.5283	Setd3
0.0751	98.98	96.21	0.0426	0.5155	Ssh2
0.075	21.35	17.41	8.891e-08	0.5212	Rnls
0.07496	64.46	58.95	2.841e-07	0.5296	Setd2
0.07493	66.8	59.85	1.021e-06	0.5285	Rbm26
0.07488	99.88	98.81	0.0001951	0.5236	Tgfbr1
0.07481	38.37	32.14	6.133e-14	0.5357	Ptbp1
0.07478	68.38	61.44	1.209e-05	0.5261	Myo9a
0.07458	15.71	8.482	3.523e-39	0.5367	Myc
0.07435	40.25	33.13	2.528e-14	0.5366	Ndfip2
0.07427	40.89	34.49	5.05e-12	0.5339	Bri3
0.07415	55.37	49.3	1.057e-08	0.5314	Arhgef40
0.07402	79.61	74.38	1.036e-05	0.5268	Arpc2
0.07396	11.06	2.948	2.619e-105	0.5407	Gm14023
0.07386	46.94	41.81	3.161e-08	0.5294	Cfap74
0.07382	46.59	40.7	1.016e-09	0.5318	Snx10
0.07378	33.31	28.56	3.138e-08	0.5262	Magi3
0.07374	11.61	4.52	8.513e-62	0.5359	Btg3
0.07371	21.15	14.44	6.513e-24	0.5353	Atox1
0.07368	50.45	46.27	3.856e-06	0.5259	Adcy9
0.07366	49.61	44.28	3.826e-09	0.5315	Wbp1l
0.07344	13.83	7.035	1.62e-41	0.5349	Slc16a1
0.07331	36.24	30.44	7.785e-13	0.5337	Rragc
0.07324	87.69	82.58	0.01051	0.5179	Mgat5
0.07318	13.78	6.708	7.184e-46	0.5361	ENSMUSG00000120024
0.07302	63.56	57.5	1.616e-07	0.53	Sgpl1
0.07291	41.56	36.33	1.346e-08	0.5289	Clcn5
0.07283	62.3	55.68	2.336e-08	0.5315	Rab7
0.07272	60.11	55.14	4.864e-06	0.5266	Cryl1
0.0727	57.68	52.7	3.35e-06	0.5267	St6gal1
0.07267	16.91	9.641	1.924e-36	0.5372	Sod1
0.07266	31.09	24.72	5.3e-15	0.534	Gvin-ps7
0.07266	57.18	51.23	3.384e-08	0.5307	Bclaf1
0.07266	94.47	91.08	8.804e-05	0.5246	Cd81
0.07254	46.18	40.39	1.036e-10	0.5333	Ptafr
0.07251	75.26	69.01	9.352e-05	0.5242	Fgd2
0.07249	38.81	32.79	9.233e-12	0.533	Fam111a
0.07243	67.71	62.35	4.391e-06	0.5272	Usp9x
0.07236	41.83	35.56	2.892e-12	0.5345	Adipor1
0.07232	26.35	20.53	2.332e-15	0.5322	Ggps1
0.07229	60.87	55.15	2.988e-08	0.5312	Sec14l1
0.07228	81.11	75.68	0.0001676	0.5237	Git2
0.07226	58.23	52.69	1.588e-08	0.5315	Ogfrl1
0.07215	86.63	82.55	0.0007092	0.5219	Tcf4
0.07209	17.29	10.41	2.069e-31	0.5355	Donson
0.07199	17.75	10.45	2.419e-34	0.5373	Med7
0.07191	74.38	69.25	2.866e-05	0.5255	Adgre1
0.07191	83.01	76.73	0.01032	0.5179	Med13l
0.0718	43.73	37.8	6.712e-12	0.5346	Srsf6
0.07165	40.51	35.42	5.626e-09	0.5293	Otulin
0.07161	28.78	22.9	6.517e-15	0.533	Rnf146
0.07161	60.16	54.59	2.326e-06	0.5273	Mlxip
0.07156	93.97	90.09	0.0004	0.5227	Gns
0.07143	17.72	12.47	5.909e-16	0.5269	Gm11867
0.07137	21.79	15.51	4.59e-20	0.5331	Bzw2
0.07136	23.69	17.46	1.062e-18	0.5335	Snx8
0.07133	23.16	17.41	4.099e-15	0.53	Map3k20
0.07132	61.36	55.57	3.517e-07	0.5291	Stk4
0.0712	74.12	67.62	5.441e-07	0.5295	Hnrnpk
0.07119	33.05	26.53	4.59e-15	0.5349	Snx3
0.07117	20.85	14.08	5.91e-24	0.535	Synj2
0.07111	64.2	58.92	1.99e-06	0.5278	Nsd3
0.0711	77.01	71.71	0.0001587	0.5236	Fmnl3
0.07099	87.31	81.55	0.007097	0.5186	Acap2
0.07096	71.89	65.6	3.71e-05	0.5251	Lpin2
0.07095	39.43	33.86	1.487e-11	0.533	Rab11a
0.07093	66.07	61.58	0.0001011	0.5237	Trappc9
0.07092	30.62	24.28	6.886e-16	0.5348	Rela
0.07086	25.8	19.07	7.276e-20	0.5357	Samd4b
0.07082	40.33	36.24	4.775e-06	0.5241	Gm35154
0.07066	32.32	26.37	7.179e-14	0.5334	Dstn
0.07065	74.35	68.45	0.0002075	0.5232	Ash1l
0.07059	31.65	25.13	6.817e-16	0.5352	Igsf8
0.07054	59.26	53.86	1.413e-06	0.5277	Zfand6
0.07049	62.42	56.75	2.032e-05	0.5252	Mtss1
0.07048	32.14	26.52	1.69e-11	0.5304	Rmdn1
0.07047	21.06	14.5	6.41e-23	0.5346	Vhl
0.07028	58.61	53.65	1.523e-06	0.5276	Herc4
0.0702	34.4	27.91	5.968e-14	0.5342	Lat2
0.07018	36.03	30.55	2.992e-11	0.5315	Cyb561a3
0.07017	33.02	27.64	2.261e-11	0.5306	Zmym5
0.07007	69.67	63.22	3.758e-05	0.525	Lrba
0.07003	29.89	24.16	2.067e-13	0.5318	Khnyn
0.07001	58.09	53.16	4.924e-06	0.5264	Rps6kc1
0.06995	79.26	73.48	0.004181	0.5193	Rcsd1
0.06979	57.3	51.27	8.01e-07	0.528	Osbpl8
0.06967	18.46	13.22	1.278e-15	0.5273	Gm27008
0.06965	72.51	68.53	0.001789	0.5204	Cacna1d
0.06962	41.33	35.34	1.674e-11	0.5333	Samd8
0.06961	10.59	3.15	1.703e-86	0.5373	ENSMUSG00000120673
0.06954	47.88	41.5	1.709e-09	0.5316	Cep85l
0.06952	18.43	11.98	5.608e-25	0.5334	Got1
0.06951	33.84	27.63	1.34e-13	0.5336	Srsf10
0.06951	36.85	30.37	1.11e-12	0.5335	Arl6ip5
0.06951	74.82	70.11	8.799e-05	0.5243	Itgav
0.06948	48.23	42.65	1.447e-09	0.5319	Tcirg1
0.06939	49.02	43.66	5.57e-08	0.5292	Memo1
0.06918	53.06	47.14	3.896e-09	0.5319	Ap2b1
0.06914	19.13	12.98	1.69e-21	0.532	Relb
0.0691	19.74	13.35	3.284e-22	0.5329	ENSMUSG00000121063
0.06909	42.7	37.28	2.582e-09	0.5304	Cdc42se2
0.06903	54.61	49.08	7.408e-07	0.5278	Nrros
0.069	53.99	48.7	3.685e-07	0.5283	Far1
0.06894	77.07	70.56	0.001535	0.5207	Rnf216
0.06893	40.98	35.11	1.099e-10	0.532	Pphln1
0.06875	34.34	28.4	9.379e-13	0.5328	Orai2
0.06873	36.97	31.48	1.481e-09	0.5293	Pkp4
0.06873	60.05	54.89	1.223e-05	0.5256	Plekhm3
0.0687	48.99	46.09	0.001921	0.519	Nr3c2
0.06859	39.87	33.8	5.553e-12	0.5336	Serp1
0.06854	37.82	32.21	6.542e-11	0.5315	Trim26
0.06837	6.405	1.784	1.458e-56	0.5232	Gm18870
0.0682	23.4	16.55	7.129e-22	0.5356	Mnt
0.06808	38.05	32.01	5.249e-12	0.5331	Kbtbd2
0.06807	84.85	80.18	0.0003999	0.5226	Cd33
0.06804	75.75	69.85	3.558e-05	0.5253	Ctsa
0.06797	27.99	22.75	1.557e-11	0.5288	Ccl6
0.06795	99.21	97.73	0.0007661	0.5219	Sirpa
0.0679	28.11	22.18	1.098e-14	0.5323	Zfp326
0.06788	46.94	41.91	3.058e-07	0.5275	Tfeb
0.06787	54.34	48.32	9.841e-09	0.5314	Coro1a
0.06782	46.48	41.17	3.07e-09	0.5311	Nup98
0.06779	12.81	5.715	9.387e-52	0.536	Gm44686
0.06769	31.18	25.15	2.045e-14	0.5335	Flcn
0.06766	56.54	50.28	2.154e-07	0.529	Rnf111
0.06764	38.46	32.61	1.69e-11	0.5325	G3bp1
0.06764	53.17	49.04	1.091e-05	0.5252	Stk3
0.06763	69.96	64.62	8.837e-05	0.5241	Mtmr3
0.06761	32.26	26.21	1.341e-13	0.533	Tmem50b
0.0675	19.42	12.84	2.854e-24	0.5339	Trim47
0.06746	13.63	7.111	6.958e-38	0.5334	Fam53c
0.06745	16.26	10.35	2.065e-23	0.5304	Gnb4
0.06736	48.84	43.19	6.513e-09	0.5309	Plcb2
0.06731	32.49	26.31	9.895e-14	0.5332	Adora3
0.06728	77.36	72.44	0.0001858	0.5235	Ddx17
0.06722	50.04	45.44	1.189e-06	0.5268	Abl2
0.06706	63.73	58	4.831e-05	0.5244	Sik2
0.06697	15.5	8.92	4.731e-32	0.5337	Acvrl1
0.06697	86.02	80.76	0.0007875	0.5218	Sh3glb1
0.06686	18.22	11.53	5.053e-27	0.5343	Gmfg
0.06669	8.453	2.923	2.628e-54	0.5278	4930519F16Rik
0.06669	40.63	35.28	1.282e-09	0.5304	Mgat1
0.06664	63.53	58.74	0.0002682	0.5224	ENSMUSG00000120385
0.06655	60.51	55.61	1.593e-07	0.5298	Laptm4a
0.06647	12.78	5.795	7.856e-50	0.5355	Ptp4a1 - ENSMUSG00000026064
0.06647	12.96	6.743	5.773e-36	0.5318	Depdc7
0.06643	25.01	19.22	1.999e-15	0.5314	Ypel5
0.06638	48.79	45.12	0.0001788	0.5217	Eml6
0.06635	92.66	87.53	0.4192	0.5099	Asap1
0.06633	72.39	66.17	0.0002544	0.5229	Gsk3b
0.06631	74.73	69.02	0.0006871	0.5217	Ppp1r12a
0.06626	11.11	4.47	6.389e-55	0.5335	Cry1
0.06619	66.92	60.86	5.354e-05	0.5245	Tnrc6a
0.06617	36	30.54	9.48e-11	0.5308	Mtch1
0.06614	28.55	23.09	3.414e-12	0.5298	Gm16118
0.06608	41.42	36.53	1.175e-07	0.5273	Ksr1
0.06607	59.9	56.17	0.001702	0.5199	Pde4d
0.06605	24.71	18.32	8.224e-18	0.5333	Lfng
0.06603	83.68	78.09	0.03849	0.5156	Tnrc6b
0.06601	48.79	42.55	2.779e-09	0.5314	Gpbp1l1
0.06599	7.722	1.366	4.085e-114	0.5319	Tamalin
0.06599	59.23	53.41	1.236e-07	0.5299	Nars
0.06587	13.28	7.191	1.555e-32	0.531	Crem
0.06582	16.41	10.07	2.524e-27	0.5326	Rgs3
0.06579	16.96	10.75	4.616e-25	0.532	Arhgap27os3
0.06579	41.68	36.75	1.947e-08	0.5287	Cacul1
0.06551	20.97	14.92	5.679e-19	0.5317	Gnl3
0.0655	43.35	38.26	1.387e-08	0.5293	Fnbp4
0.06544	29.54	23.02	5.413e-16	0.5343	Pnrc2
0.06542	43.73	38.41	3.36e-08	0.5287	Inpp4a
0.06538	70.87	65.14	0.0001635	0.5234	Stx7
0.06534	76.28	70.08	0.001477	0.5207	Kmt2e
0.06513	31.15	26.78	5.169e-07	0.5236	Tbc1d4
0.0651	63.5	58.12	5.672e-05	0.5242	Ralgps1
0.06496	23.93	18.17	1.997e-15	0.5308	Trim65
0.06494	51.1	45.54	5.877e-07	0.5275	Ppard
0.06494	55.72	50.5	2.059e-06	0.527	Map3k2
0.06484	48.96	44.57	1.079e-06	0.5268	Ptbp2
0.06482	8.453	1.819	4.532e-103	0.5333	ENSMUSG00000120546
0.06481	13.19	7.464	3.253e-28	0.5292	H2bc4
0.06481	20.21	14.71	1.001e-16	0.5295	Naa20
0.06474	26.73	22.52	8.59e-07	0.5218	Bcl2
0.06468	23.93	17.11	3.051e-20	0.5346	Oaz1
0.06467	39.89	34.7	2.665e-09	0.5297	Eloa
0.06467	44.63	39.14	1.313e-07	0.5277	Camta1
0.06463	16.93	11.1	3.121e-22	0.5305	2310015A10Rik
0.0646	49.99	44.29	1.464e-08	0.5304	Sun2
0.0645	17.96	11.71	6.568e-24	0.5324	Ttpal
0.06443	70.11	64.22	0.0004709	0.522	Mllt10
0.06441	65.84	60.64	0.000224	0.5228	Rps6ka3
0.06438	60.66	55.77	0.0001009	0.5234	Sdccag8
0.06429	48.99	43.29	1.897e-08	0.5301	Cd82
0.06423	36.56	31.25	2.53e-09	0.5288	Flna
0.06421	58.61	53.72	5.148e-07	0.5286	Plekho1
0.06417	39.46	34.18	1.27e-09	0.5301	Fbxl3
0.06402	72.59	67.35	0.000253	0.5229	Cep170
0.06401	32.29	26.82	4.566e-11	0.5299	Stk40
0.06399	15.91	10.05	5.813e-24	0.5304	Tspyl2
0.0639	72.27	66.98	0.002747	0.5197	Anks1
0.0637	30.16	26.93	0.000227	0.5184	2210408I21Rik
0.06367	33.96	28.82	1.888e-10	0.5297	Slc25a3
0.06358	51.51	46.18	2.287e-07	0.5284	Pik3cb
0.06351	67.39	61.42	0.0002476	0.5227	Fndc3a
0.06337	8.862	2.187	4.629e-92	0.5335	H1f3
0.06337	17.34	11.19	6.133e-24	0.5318	Bud31
0.06334	81.05	75.32	0.001781	0.5206	Ctsz
0.06325	42.97	37.53	4.423e-09	0.53	Snap23
0.06322	26.38	20.59	2.427e-14	0.5311	Ensa
0.06318	76.57	71.26	0.007332	0.5184	Dennd1a
0.06309	8.277	1.275	1.283e-137	0.535	Gm47819
0.06309	11.44	5.12	2.097e-45	0.532	Cacng8
0.06306	49.72	44.52	4.574e-08	0.5295	Fam168b
0.06306	40.83	36.3	6.84e-07	0.5258	Zfp697
0.06301	44.49	39.28	2.039e-08	0.5292	Kdm5a
0.06296	47.62	42.49	3.517e-07	0.5275	Padi2
0.06293	41.01	36.24	5.454e-08	0.5278	Ppm1b
0.06284	35.51	29.77	6.091e-11	0.5308	Klc1
0.06278	47.06	41.92	1.848e-08	0.5298	Ppp2ca
0.06278	70.49	65.12	0.000149	0.5235	Brd4
0.06277	9.623	3.79	3.646e-49	0.5294	Syn2
0.06277	58.32	53.24	1.142e-05	0.5255	Gpatch8
0.06274	70.61	65.17	0.0001138	0.5238	Pnisr
0.06273	94.38	89.76	0.3893	0.5101	Ivns1abp
0.0626	26.59	20.52	4.127e-15	0.5319	Sbds
0.06259	43.99	39.02	1.781e-06	0.5255	Dglucy
0.06257	10.59	4.772	6.473e-41	0.5293	Cd36
0.06255	40.36	35.32	1.155e-08	0.5288	Fads1
0.06249	52.38	47.83	2.985e-05	0.524	Rsu1
0.06249	59.32	54.52	0.0001026	0.5233	Peak1
0.06248	32.49	27.04	5.555e-11	0.5299	Icosl
0.06248	51.27	46.21	1.429e-07	0.5288	Mapk1
0.06245	64.76	59.84	0.0002799	0.5225	Gsap
0.06236	42.53	37.76	4.009e-08	0.5284	Ankrd10
0.06233	51.95	46.79	1.527e-07	0.5289	Ctnnb1
0.06225	11.55	6.496	2.937e-25	0.5259	Gm8091
0.06216	69.61	64.37	5.53e-05	0.5246	Spata13
0.06206	49.69	44.12	1.593e-07	0.5284	Il17ra
0.06198	32.7	27.27	5.028e-11	0.53	Rimoc1
0.06196	61.19	55.34	9.411e-05	0.5235	Cds1
0.06194	47.65	42.8	2.634e-06	0.5257	Golgb1
0.0619	54.31	49.23	9.076e-06	0.5254	Tmem131l
0.06187	27.23	22.51	2.663e-10	0.5271	Mapk1ip1
0.06167	48.9	43.82	1.279e-06	0.5266	Rnf38
0.06155	55.63	50.27	1.449e-06	0.5273	Prdm2
0.06155	69.99	64.55	0.0009976	0.521	Pik3r5
0.06145	46.89	42.26	2.55e-05	0.5235	Traf3
0.06143	7.195	2.822	1.093e-36	0.522	Shroom4
0.06136	21.41	16.47	3.629e-13	0.5273	Scarna2
0.06131	9.857	3.427	2.449e-63	0.5324	Gm41611
0.0613	73.91	68.4	0.004308	0.5191	Atrx
0.06125	75.05	70.21	0.00271	0.5198	Apc
0.0612	12.31	5.785	9.203e-44	0.533	Rab37
0.06115	10.44	4.878	1.035e-37	0.5283	Optn
0.06112	72.04	66.23	0.0008096	0.5214	Nfam1
0.06109	45.13	41.3	5.672e-05	0.5225	Cdyl
0.06101	96.81	93.06	1	0.5062	Ikzf1
0.061	62.59	58.76	9.999e-05	0.5236	Xiap
0.06091	23.25	18	4.473e-13	0.5282	Fblim1
0.0609	26.35	21.31	8.017e-11	0.5272	Bcl2l11
0.06088	32.96	28.23	3.871e-09	0.5276	Cdk11b
0.06085	33.08	28.8	3.907e-06	0.5226	Rabgap1l
0.06079	32.03	26.38	5.368e-10	0.5283	Plpp1
0.06069	96.14	91.89	0.9699	0.5066	Ophn1
0.06067	54.55	49.15	7.433e-06	0.5256	Ascc3
0.06065	76.57	71.13	0.006583	0.5186	Rapgef1
0.06063	47	42.02	3.811e-07	0.5273	Zfp90
0.06061	54.05	49.61	1.937e-05	0.5246	Tmem245
0.0606	57.94	52.92	2.994e-06	0.5269	Ttyh3
0.06047	30.24	24.52	3.355e-12	0.5305	Mapk1ip1l
0.06043	54.78	49.91	2.629e-05	0.5244	Atxn7
0.06042	65.78	60.23	8.114e-05	0.5239	Csnk1a1
0.06041	58.29	53.51	1.194e-05	0.5255	Ctnnd1
0.06037	44.95	39.5	2.555e-08	0.5291	Cpne3
0.06035	97.66	94.98	0.3316	0.5106	Dst
0.06034	79.32	74.67	0.007079	0.5185	Anxa3
0.06032	44.28	39.5	7.038e-07	0.5264	Cpeb4
0.0603	34.25	29.68	2.944e-08	0.5266	Slc46a3
0.06028	54.31	49.39	4.456e-06	0.5261	Prcp
0.06027	59.58	55.45	0.002093	0.5196	Zfp407
0.0602	18.87	13.42	4.12e-17	0.5288	Katna1
0.0602	54.93	51.85	0.001396	0.5199	Supt3
0.06019	32.35	27.15	1.826e-10	0.5292	Gdi1
0.06014	65.11	59.35	0.0002409	0.5226	Arid4a
0.0601	68.44	63.89	0.0004364	0.5221	Zfp292
0.06008	37.17	31.72	4.511e-10	0.5301	Tnfrsf1a
0.06004	53.52	48.64	8.43e-06	0.5254	Prr14l
0.06001	70.52	65.1	0.002398	0.5199	Agps
0.05998	35.04	29.29	1.323e-10	0.5302	Tk2
0.05992	32.29	26.81	1.892e-10	0.529	Gabpb1
0.05989	49.61	45.08	2.581e-06	0.5261	Adcy7
0.05988	20.39	14.91	5.279e-15	0.5281	Nmt2
0.05987	12.64	6.824	1.452e-31	0.5298	Gm20721
0.05979	25.71	20.68	1.439e-11	0.5279	Socs4
0.0597	81.16	76	0.04755	0.5152	Man1c1
0.05956	27.43	23.58	2.67e-06	0.5213	Gm20696
0.05948	62.01	56.12	1.503e-05	0.5255	Srrm1
0.05938	16.88	11.19	3.96e-21	0.5298	Cirbp
0.05937	20.24	14.82	1.306e-15	0.5286	Topors
0.05936	8.891	2.988	6.131e-60	0.5297	A630072M18Rik
0.05933	68.47	62.63	4.684e-05	0.5247	Itm2c
0.05928	7.956	1.809	8.532e-91	0.5308	Tob1
0.05924	54.61	47.93	2.267e-08	0.5306	Rpl3
0.0592	24.71	19.35	4.655e-13	0.5289	Myl12a
0.05915	68.32	63.82	0.002036	0.52	Cdkal1
0.05909	51.45	46.96	2.684e-05	0.524	Arhgef11
0.05904	22.55	18.99	2.173e-07	0.5214	Ddx3y
0.05904	59.05	53.39	3.229e-05	0.5245	Zdhhc20
0.05899	16.96	11.03	1.65e-22	0.5306	Isca1
0.05888	26.79	22.02	7.921e-10	0.5262	Dennd2c
0.05887	63.06	56.66	2.567e-06	0.5273	Ptma
0.05879	21.82	16.76	5.684e-13	0.5273	Fam53a
0.05879	64.61	58.81	6.694e-05	0.5241	Spag9
0.05877	66.72	61.33	0.0001762	0.5231	Casp8
0.05875	71.1	65.61	0.00442	0.519	Setd5
0.0587	65.52	60.08	5.233e-05	0.5244	Ppt1
0.05865	24.63	19.54	6.191e-12	0.5277	Zrsr2
0.05862	66.45	61.38	0.0003413	0.5223	Nfatc1
0.0586	33.93	28.83	1.211e-09	0.5286	Zfp715
0.05845	14.04	8.477	2.016e-24	0.5286	Selenow
0.05837	36.82	31.2	6.304e-10	0.5297	Limd2
0.05825	27.61	22.49	3.537e-11	0.5282	Vps18
0.05811	14.04	8.214	5.861e-27	0.5297	Map2k3
0.05809	19.86	15.35	1.017e-11	0.525	Fbxo33
0.05809	37.09	32.29	1.486e-07	0.5261	Klf13
0.05805	40.1	34.92	8.109e-08	0.5272	Kdm3a
0.05798	85.32	79.64	0.07708	0.5143	Otulinl
0.05796	11.64	5.871	1.201e-34	0.5293	Haao
0.05776	13.83	8.482	4.375e-23	0.5277	E130102H24Rik
0.05774	32.14	27.07	2.02e-09	0.5276	9130015G15Rik
0.05774	43.99	39.78	3.225e-05	0.5229	Add3
0.05762	62.21	57.68	0.0001867	0.5228	Pias1
0.05753	79.91	74.77	0.008735	0.5182	Pou2f2
0.05749	61.22	56.42	0.0001148	0.5233	Dennd5a
0.05746	45.66	39.92	3.005e-07	0.5272	Smad1
0.05746	57.94	52.79	0.0001018	0.5232	Wdr44
0.05742	46.01	42.13	5.799e-05	0.5226	Fbxw7
0.05724	39.63	36.48	0.0005866	0.5192	Kcnip3
0.05723	63.59	59.8	0.0009097	0.5209	Arrb1
0.05721	20.12	14.81	4.102e-15	0.5281	Zfp655
0.0572	10.97	4.772	1.92e-45	0.5311	Ildr1
0.05719	31.44	28.22	0.000253	0.5186	Cux2
0.05709	27	22.66	1.618e-08	0.5246	Fignl2
0.05709	81.66	76.72	0.01136	0.5177	Il6st
0.05707	8.307	2.772	7.187e-57	0.5279	Bcl2a1d
0.05705	8.16	2.409	4.283e-67	0.5289	Rilpl2
0.05702	22.17	16.57	1.159e-14	0.5289	Cxcl16
0.05691	10.62	4.621	8.667e-44	0.53	Hes1
0.05685	46.15	41.08	1.576e-07	0.5279	Zfp445
0.05682	29.22	25.52	1.257e-05	0.5207	Spred2
0.05679	30.65	26.32	2.146e-07	0.5241	Tdrd3
0.05677	47.03	42.16	1.245e-06	0.5263	Ogdh
0.05677	45.74	41.06	1.926e-06	0.5257	Resf1
0.05675	38.46	34.21	2.617e-07	0.5261	Ube2i
0.0567	53.99	50.51	0.0005361	0.521	Vps41
0.05663	30.18	25.61	1.67e-08	0.5257	Tbc1d31
0.05659	9.652	3.76	3.207e-50	0.5296	Snhg5
0.05659	37.06	32.5	2.571e-06	0.5238	Stau2
0.05654	16.76	12.01	8.952e-14	0.5246	Simc1
0.05649	14.77	9.217	1.563e-22	0.5284	Rasgrp4
0.05646	18.6	14.5	4.413e-09	0.5214	1700025G04Rik
0.05643	36.88	32.55	1.54e-07	0.5261	Calu
0.05635	63.06	57.88	4.365e-05	0.5245	Calm1
0.05629	21.97	16.65	7.664e-14	0.5281	Jpt1
0.05619	75.84	69.88	0.02647	0.5162	Sh3pxd2a
0.05617	21.41	15.47	8.914e-17	0.5302	Tpi1
0.05615	17.96	12.23	1.676e-19	0.5296	Cdk5rap1
0.05607	11.79	6.753	2.774e-24	0.5258	Bcl2a1a
0.05606	61.3	55.21	7.779e-05	0.5237	Slc6a6
0.05604	16.79	11.61	4.103e-17	0.5271	Fhl3
0.05601	23.08	18.04	4.975e-11	0.5258	B4galt5
0.05594	29.16	24.05	2.365e-10	0.5278	Akirin1
0.05583	41.33	36.45	1.241e-06	0.5253	Rab27a
0.05579	75.4	70.12	0.003111	0.5196	Rab14
0.05569	36.24	32.4	5.088e-06	0.5232	Slc9a1
0.05565	51.36	46.04	5.578e-06	0.5255	Epc1
0.05554	48.14	43.79	6.76e-06	0.525	Ino80d
0.05548	43.76	38.63	2.256e-06	0.5252	Ttc39b
0.05541	44.98	39.96	9.107e-07	0.5262	Dennd1c
0.05539	56.77	53.51	0.003005	0.5189	Lcorl
0.05536	33.28	28.28	5.697e-09	0.5273	Kat7
0.05536	83.68	79.98	0.01307	0.5176	Sall1
0.05534	98.98	98.12	0.000461	0.5225	P2ry12
0.05532	11.76	6.103	2.958e-32	0.5287	Pvr
0.05524	22.64	17.46	7.849e-13	0.5276	Med22
0.05504	38.23	33.9	3.289e-07	0.5258	Leng8
0.05503	73.85	70.92	0.03456	0.5157	Vti1a
0.05494	85.99	79.97	0.4417	0.5097	Asph
0.05493	42.79	37.87	3.049e-06	0.5248	Pals2
0.05493	87.39	82.78	0.0733	0.5144	Ptgs1
0.0549	50.98	46.27	5.545e-05	0.5232	Abcd2
0.05487	44.4	39.57	2.591e-07	0.5272	Arpc5
0.05484	49.14	44.58	1.223e-05	0.5245	Cdk12
0.0547	14.71	9.389	5.936e-21	0.5275	Mapk6
0.05469	46.45	42.01	4.111e-06	0.5252	Syncrip
0.05459	53.47	48.52	3.85e-05	0.5238	Phf20l1
0.05458	54.72	49.97	5.181e-05	0.5236	Hs6st1
0.05455	34.51	30.19	1.314e-07	0.5256	Slc25a37
0.05454	28.4	23.3	4.22e-10	0.5272	Gripap1
0.05451	73.59	68.47	0.02025	0.5166	Dock11
0.05448	32.85	28.47	1.909e-07	0.5249	Unk
0.05444	45.19	41.13	5.826e-05	0.5225	Cbfb
0.05441	12.23	6.551	2.021e-30	0.5287	Trmt10a
0.05437	30.89	26.44	5.426e-08	0.5252	Zbtb1
0.05432	97.95	96.02	0.05967	0.5149	Siglech
0.05426	62.77	58.24	0.000168	0.523	Hnrnpm
0.05426	86.11	81.76	0.0222	0.5167	Eif4g2
0.05421	40.68	36.31	1.237e-06	0.5253	Ggnbp2
0.05418	10.97	5.866	1.09e-27	0.526	Trim17
0.05416	29.04	24.24	1.126e-09	0.5269	Gigyf1
0.05415	50.66	46.43	7.448e-05	0.5229	Fam13b
0.05413	62.88	58.42	0.001557	0.5202	Ube2k
0.0541	53.7	48.35	7.057e-06	0.5255	Arap1
0.0541	53.76	49.42	6.336e-05	0.5234	Capza1
0.05407	61.57	56.23	2.743e-05	0.5249	Pfn1
0.05405	49.52	45.37	6.922e-05	0.5228	Elf4
0.05401	8.073	2.439	1.072e-63	0.5283	Hspa1a
0.05401	65.81	59.94	0.0004136	0.522	Acin1
0.05398	10.03	4.853	5.879e-33	0.5263	ENSMUSG00000120693
0.05397	94.5	90.04	1	0.5043	Prex1
0.05395	41.91	37.14	2.461e-07	0.5268	Pip4p1
0.0538	9.301	3.8	3.736e-44	0.5277	Gm9725
0.0538	66.16	61.79	0.0006151	0.5216	Tgfb1
0.05377	14.74	9.822	7.135e-18	0.5258	5330406M23Rik
0.05376	16.53	10.88	3.273e-20	0.5288	Ninj1
0.05376	17.37	12.51	1.302e-14	0.5257	Slc7a5
0.05375	52.41	48.43	0.0001968	0.522	Rabep1
0.0537	30.74	25.64	1.511e-09	0.5273	Tnfaip8l2
0.05356	10.24	4.783	1.359e-36	0.5277	Snhg12
0.05349	8.774	3.145	1.157e-52	0.5282	ENSMUSG00000121168
0.0534	33.69	29.51	1.707e-06	0.5234	Gmeb1
0.0534	57.27	52.49	7.4e-05	0.5235	Ubap2l
0.05339	72.01	66.97	0.006489	0.5185	Ccdc50
0.05331	49.08	44.29	7.463e-06	0.525	Arnt
0.0533	61.95	57.24	0.0005215	0.5215	Ets1
0.05329	48.84	44.47	0.0001906	0.5216	Bcl9
0.05328	67.86	63.13	0.01013	0.5176	Rbm6
0.05318	31.27	26.3	5.304e-09	0.5267	Hdac5
0.05312	78.68	73.29	0.1084	0.5135	Kansl1
0.05312	40.68	36.39	5.501e-06	0.524	Pspc1
0.05311	22.23	17.52	7.015e-11	0.5253	Tollip
0.05301	70.49	65.2	0.01257	0.5173	Celf1
0.053	14.01	9.212	8.136e-18	0.5251	Pkib
0.05299	87.19	82.03	0.22	0.5117	Akap13
0.05292	11.99	6.496	6.304e-29	0.5279	Rbm38
0.05291	77.07	73.23	0.02194	0.5166	Pacsin2
0.0529	29.98	25.45	5.317e-08	0.5248	Pfkfb4
0.05286	45.8	41.75	6.496e-05	0.5224	Rbpj
0.05286	46.83	43.49	0.000519	0.5203	9930021J03Rik
0.05279	39.78	35.74	1.788e-05	0.5227	Tmem87b
0.0527	33.52	28.84	3.36e-08	0.5263	Skp1
0.05268	9.242	3.775	6.996e-44	0.5276	4933433G15Rik
0.05268	22.46	17.29	2.851e-12	0.5268	Rcn2
0.05261	9.125	4.127	1.023e-34	0.5252	Gm4221
0.05261	49.4	45.07	2.903e-05	0.5237	Sp3
0.05256	64.64	60.15	0.003716	0.519	Sppl3
0.05255	27.73	23.77	9.36e-07	0.5222	Ugt1a8
0.0525	52.73	48.23	0.001685	0.5193	Aopep
0.05246	17.34	12.27	1.02e-15	0.5265	Neu1
0.05246	29.63	25.08	1.44e-07	0.524	4930517O19Rik
0.05246	57.88	53.63	0.0009567	0.5205	Map2k5
0.05229	22.43	17.4	1.215e-11	0.5262	Prkx
0.05228	29.04	23.71	2.271e-10	0.5277	Prkab1
0.05217	55.07	51.4	0.001851	0.5195	Hipk2
0.05215	89.38	85.34	0.1599	0.5125	Tacc1
0.05211	11.76	6.486	1.69e-26	0.5266	Gm8013
0.05206	33.11	28.26	4.245e-08	0.5259	Hsd17b12
0.05199	10.85	6.536	6.999e-19	0.5223	Gm15964
0.05194	16.82	12.08	5.542e-14	0.5248	Ip6k2
0.05188	52.53	48.72	0.0002326	0.5218	Ago3
0.05186	24.8	20.28	1.84e-09	0.5249	Map3k11
0.05183	22.67	18.11	2.022e-09	0.5238	Atosa
0.05183	44.75	40.99	1.327e-05	0.5239	Slc44a2
0.05159	57.39	52.8	0.0002258	0.5222	Hmbox1
0.05154	39.87	35.47	2.075e-06	0.5246	Csf2rb
0.05152	21.15	17.07	1.381e-08	0.5222	Ppp1r13b
0.05147	7.049	1.416	2.262e-91	0.5282	Glipr2
0.05147	31.44	28.51	0.000396	0.5182	Prkag2
0.05145	14.8	9.545	1.195e-19	0.5268	Hexim1
0.05135	42.97	38.68	5.045e-06	0.5245	Elk4
0.05128	32.26	27.66	8.844e-08	0.5252	Wbp2
0.05124	21.5	16.38	1.428e-12	0.5266	Dot1l
0.05121	59.05	54.48	0.0006242	0.5211	Fam117b
0.05121	82.51	77.21	0.2502	0.5113	Mvb12b
0.0512	16.55	11.8	1.71e-14	0.525	Cfap20
0.05105	13.28	8.295	2.261e-20	0.5257	2410002F23Rik
0.05103	56.89	51.99	0.0001211	0.5229	Eif3a
0.05101	21.18	16.46	1.024e-10	0.5245	Cd52
0.05099	53.23	48.28	9.512e-06	0.5252	Arf1
0.05088	65.57	59.68	0.001703	0.5201	Caprin1
0.05084	11	6.194	7.408e-24	0.5246	Glrx
0.05084	48.87	45.57	0.0009105	0.5199	Ubtd1
0.05081	50.19	46	0.0001271	0.5222	Pon3
0.05081	99.74	98.98	0.000406	0.5227	Lgmn
0.05077	10.12	5.569	2.027e-23	0.5233	Zfp268
0.05067	37.76	32.52	1.142e-07	0.5264	Gnai3
0.05062	41.71	38.04	5.381e-05	0.5221	Strada
0.0506	50.13	45.69	0.0001532	0.522	Cept1
0.05059	30.77	26.19	1.653e-07	0.5243	Tank
0.05049	49.25	44.97	3.512e-05	0.5235	Acly
0.05049	51.92	48.35	0.002244	0.519	2510009E07Rik
0.05035	49.96	46.31	0.002724	0.5185	AW554918
0.05034	28.22	23.7	2.131e-08	0.5248	Renbp
0.05028	38.7	35.64	0.001824	0.5178	Taf3
0.05024	29.83	26.42	0.0001066	0.519	Gm49797
0.05022	82.86	76.9	0.3874	0.5101	Man1a2
0.0502	13.57	8.109	1.453e-23	0.5275	Ubald2
0.0502	15.5	10.82	1.415e-14	0.5242	Lcmt1
0.05017	42.88	38.02	9.235e-07	0.5259	Vps26a
0.05012	31.56	27.53	1.866e-06	0.5228	Galnt11
0.05012	34.6	30.75	1.017e-05	0.5222	Pik3r6
0.05003	16.73	11.89	1.218e-14	0.5252	Nectin2
0.05002	32.93	28.28	1.444e-07	0.525	Hspa9
0.04997	25.8	21.88	5.073e-07	0.522	Socs6
0.04997	38.7	35.47	0.0008834	0.5186	Acvr2a
0.04993	29.07	24.87	2.417e-07	0.5236	Trpv2
0.04993	60.22	55.36	0.001854	0.5198	Fnip2
0.04987	43	38.44	3.245e-06	0.5248	Ankrd13a
0.04986	14.98	10.02	4.118e-17	0.5255	Lysmd3
0.04986	29.1	25.19	2.237e-06	0.522	Ccdc82
0.04979	42.97	38.16	4.668e-06	0.5245	Apobec3
0.04973	13.95	9.6	3.151e-14	0.5227	Acot9
0.04972	9.008	3.749	4.871e-41	0.5265	Gm39556
0.04969	88.74	83.92	0.4627	0.5096	Nckap1l
0.04967	58.73	54.03	0.0003481	0.5218	Fbrsl1
0.0496	22.43	17.39	1.965e-11	0.5259	Sfr1
0.04959	34.1	30.38	1.543e-05	0.5218	Arih2
0.04953	83.88	80.97	0.2682	0.5112	Prkn
0.04953	27.43	23.04	2.061e-08	0.5246	Rgl2
0.04946	48.41	43.64	4.317e-05	0.5231	Kdm2b
0.04945	13.37	8.396	6.939e-20	0.5255	Zfp622
0.04943	11.93	7.383	6.366e-19	0.5235	Mllt11
0.04925	39.25	35.11	1.685e-05	0.5227	Stxbp3
0.04925	55.81	51.65	0.0003096	0.5218	Adnp
0.04922	38.58	34.65	6.356e-06	0.5235	Paip2
0.04922	63.41	58.63	0.003361	0.5191	Rab2a
0.04921	20.68	16.4	1.721e-09	0.523	Zfp131
0.04918	11.73	7.156	2.368e-19	0.5235	Rhbdf2
0.04918	61.95	57.27	0.0009672	0.5207	Npc1
0.04913	30.94	27	1.078e-06	0.5231	Hprt
0.04911	28.81	24.75	6.481e-06	0.521	Sp4
0.0491	39.49	36.41	0.001103	0.5185	Ppp1r12b
0.04907	20.65	15.64	1.696e-12	0.526	Casp1
0.04907	75.02	70.26	0.04705	0.5151	Cerk
0.04906	52.73	49.28	0.002604	0.5188	Nlk
0.04903	73.3	68.42	0.0556	0.5148	Abl1
0.04901	41.42	36.63	2.179e-06	0.5248	Ube2d2a
0.04899	23.52	19.09	9.287e-09	0.5234	Ints6
0.04898	7.107	2.167	2.286e-55	0.5248	Sik1
0.04894	35.01	30.51	1.483e-06	0.5238	Rasa4
0.04889	24.98	20.67	2.737e-08	0.5234	Sh3gl1
0.04883	9.096	3.966	1.404e-37	0.5259	Gm37876
0.04872	68.56	64.19	0.01488	0.517	Taok3
0.0486	11.26	6.239	2.347e-25	0.5255	Ticam1
0.04859	53.29	48.62	2.102e-05	0.5245	Commd8
0.04857	59.4	55.33	0.002724	0.5192	Ccny
0.04856	51.21	47.42	0.0006616	0.5204	Fgd4
0.04855	10.27	5.765	1.817e-22	0.5231	Baiap2
0.04849	46.68	42.07	5.116e-06	0.525	Ssb
0.04843	67.33	63.22	0.003658	0.5192	Ddx6
0.04838	10.5	5.564	2.261e-26	0.5248	Batf
0.04834	25.53	21.59	7.95e-07	0.5215	Rnf144b
0.04833	44.37	39.83	1.096e-05	0.5239	Ik
0.04833	49.81	45.46	0.0003314	0.5211	Cntrl
0.04826	46.07	41.68	1.69e-05	0.5238	Supt20
0.04817	38.32	33.8	4.364e-06	0.5237	Stk38
0.04817	67.94	64.03	0.02574	0.5161	Pkig
0.04814	32.41	27.76	5.456e-08	0.5256	Clcn4
0.04811	38.99	34.8	1.818e-05	0.5226	Lpxn
0.04809	17.58	13.06	9.322e-12	0.5234	Csgalnact2
0.04808	34.51	29.9	6.839e-07	0.5243	Suco
0.04807	96.72	92.98	1	0.5001	Chd9
0.04806	39.13	34.51	1.483e-06	0.5247	Rhog
0.04806	43.9	40.04	0.000324	0.5204	Stat5b
0.04802	65.34	60.88	0.006912	0.5181	Ubr5
0.04799	44.31	39.56	6.469e-06	0.5244	Hnrnpul2
0.04798	25.01	21.86	9.797e-05	0.5178	Nubpl
0.04789	65.87	62.51	0.01374	0.5171	Strn3
0.04779	9.593	5.09	3.434e-24	0.5228	C430049B03Rik
0.04776	53.9	50.4	0.002544	0.519	Tmem273
0.04771	38.02	34.22	3.743e-05	0.5217	St3gal2
0.04766	61.89	58.42	0.007126	0.518	Fbxo11
0.04765	8.511	3.331	1.85e-43	0.526	Gm30541
0.04765	22.37	17.47	8.541e-11	0.5252	Plau
0.04762	17.11	12.71	6.772e-12	0.5233	Hmga2-ps1
0.0476	9.418	4.702	3.502e-28	0.5239	Siah2
0.04757	18.89	16.64	0.001235	0.5139	Hsph1
0.04756	79.7	74.79	0.09651	0.5138	Cbl
0.04753	53.09	48.59	0.0003414	0.5214	Oga
0.04751	18.05	13.96	7.334e-10	0.522	Mgat4b
0.04751	59.29	55.92	0.008235	0.5176	Cog5
0.0475	34.89	30.19	3.348e-07	0.5249	Ldb1
0.04741	8.687	3.775	4.304e-36	0.5248	Trp53inp2
0.04731	59.02	55.21	0.006358	0.518	Mark2
0.04726	76.34	72.43	0.1139	0.5133	Parp8
0.04726	42.67	38.33	6.314e-05	0.522	Cyth3
0.04718	45.36	40.13	4.855e-06	0.5248	Lmbrd1
0.04716	27.38	23.39	3.729e-07	0.5227	Dennd4b
0.04714	38.43	34.71	6.704e-05	0.5213	Grk3
0.04712	45.36	41.44	0.0001867	0.5212	Baz1a
0.04708	75.96	71.68	0.113	0.5134	Capn3
0.04707	27.32	23.01	1.599e-07	0.5232	Ssu72
0.04704	45.63	41.62	0.0001731	0.5214	Tlr4
0.04683	47.27	43.91	0.001433	0.5191	Sesn1
0.0468	30.77	26.15	8.501e-08	0.5248	Cdc42se1
0.0468	46.68	43.21	0.001024	0.5195	Klhl7
0.04671	9.272	4.601	3.198e-28	0.5237	Gm20703
0.04671	23.28	19.13	2.796e-08	0.5227	Zfp68
0.04665	50.89	47.11	0.0006629	0.5204	Gusb
0.04663	76.4	71.52	0.02726	0.5162	Ctsh
0.04658	52.88	48.38	0.0005693	0.5207	Phc3
0.04655	57.12	52.34	0.0003106	0.5218	Arl8b
0.04653	38.14	33.82	4.455e-06	0.5236	Derl1
0.04649	30.94	26.74	5.412e-07	0.5236	Chuk
0.04646	16.64	12.05	6.196e-13	0.5238	Cebpb
0.04642	41.24	36.74	1.185e-05	0.5233	Atxn2l
0.04642	42.21	38.83	0.001668	0.5183	Ncoa1
0.04637	25.21	21.19	2.951e-07	0.5221	Ipmk
0.04635	23.19	19.15	9.923e-08	0.522	ENSMUSG00000121501
0.04633	25.5	20.39	3.888e-10	0.5259	Ifi30
0.04633	50.6	46.15	8.577e-05	0.5227	Ybx1
0.0463	15.62	11.27	1.493e-12	0.5228	H2-Ob
0.0463	47.32	43.54	0.000217	0.5213	Glyr1
0.04624	42.94	38.48	2.072e-05	0.5231	Mlxipl
0.04624	41.39	37.62	9.687e-05	0.5214	Eprs
0.04624	79	73.81	0.3184	0.5106	Stag1
0.04622	7.078	1.976	3.122e-62	0.5256	Gm9484
0.04622	11.17	6.446	1.13e-21	0.5238	R74862
0.04622	24.33	19.46	7.49e-10	0.5251	Hnrnph2
0.0462	30.77	26.62	1.513e-06	0.5227	Pgs1
0.04618	7.02	2.091	2.143e-56	0.5247	ENSMUSG00000120371
0.04617	60.84	55.88	0.001881	0.5198	Aff1
0.04608	21.7	17.81	1.721e-07	0.521	Enc1
0.04605	14.13	10.16	1.674e-11	0.5208	Itga5
0.046	16.55	13.09	2.388e-07	0.5183	Dipk1a
0.04596	29.8	26	5.005e-06	0.5216	Mdm2
0.04596	26.15	22.36	2.569e-05	0.5191	Cmya5
0.04583	35.95	31.44	2.109e-06	0.5237	Mafg
0.04578	6.99	2.459	3.295e-43	0.5228	Pcnx2
0.04578	28.87	24.8	1.224e-06	0.5223	Naa50
0.04576	13.02	8.759	2.236e-14	0.5219	Fam220a - ENSMUSG00000083012
0.04572	24.83	21.48	2.401e-05	0.5189	Ywhaq
0.04569	29.01	24.95	6.649e-07	0.5228	Mbd6
0.04568	38.37	36.41	0.03642	0.5137	Umad1
0.04563	20.21	15.59	1.169e-10	0.5239	Pgrmc1
0.04562	6.318	1.593	2.421e-63	0.5237	Dusp18
0.0456	37.58	33.99	0.0003968	0.5193	Cblb
0.0456	78.21	74.09	0.07615	0.5143	Prrc2c
0.04556	7.751	3.029	1.015e-39	0.5237	Qpct
0.04554	13.28	9.656	1.192e-09	0.5186	Prkcq
0.04553	38.08	33.53	2.228e-06	0.5242	Tmem86a
0.04552	12.58	8.3	2.89e-15	0.5221	Gm47469
0.0455	24.31	21.9	0.003172	0.5145	Cdyl2
0.0455	68.65	64.61	0.03773	0.5154	Fndc3b
0.04549	19.92	15.76	7.223e-09	0.5218	Rnf185
0.04544	34.78	30.55	2.536e-05	0.5214	Cstf3
0.04539	41.42	37.68	4.731e-05	0.5221	Med1
0.04538	66.51	63.13	0.05934	0.5145	Sipa1l1
0.04536	9.974	5.916	2.874e-18	0.5209	Arl5c
0.04533	15.09	10.98	1.259e-11	0.5216	Gm42962
0.04526	43.96	39.72	0.0001976	0.5209	Tmem243
0.04524	16.96	13.59	7.47e-07	0.518	Prelid2
0.04524	58.2	54.27	0.006369	0.5179	Spred1
0.04513	47.47	43.6	0.0009847	0.5196	Pou2f1
0.04511	8.394	4.274	6.889e-24	0.5209	Gm13391
0.04509	11.52	7.403	1.386e-15	0.5213	Igfbp4
0.04508	7.371	2.837	4.999e-39	0.5229	Tex30
0.04508	8.307	3.472	3.949e-37	0.5243	Gm30198
0.04508	29.98	25.9	2.344e-06	0.5222	Furin
0.04505	6.522	1.683	2.774e-63	0.5242	Sertad1
0.04502	34.81	31.64	0.0006814	0.5183	Foxo1
0.04498	17.67	13.37	7.623e-11	0.5227	Tatdn2
0.04492	7.546	3.195	5.235e-33	0.522	Dusp10
0.0449	51.04	47.53	0.007777	0.5171	Atp11c
0.04489	21.03	16.86	1.34e-08	0.5221	Pnp
0.04488	66.07	61.87	0.008471	0.5179	Fkbp15
0.04482	31.65	27.74	5.361e-06	0.522	Lap3
0.04478	48.46	44.03	0.0001545	0.5218	Prpf4b
0.04477	34.07	30.42	2.201e-05	0.5214	Fbrs
0.04473	7.166	2.253	3.118e-53	0.5247	4833438C02Rik
0.04471	51.71	47.59	0.001104	0.5198	Trpm7
0.04469	33.64	29.61	1.092e-05	0.5219	Sh2b2
0.04461	49.9	45.93	0.0008219	0.52	Epc2
0.04454	17.55	13.61	4.73e-09	0.5208	Slc7a6
0.04449	13.54	9.631	1.187e-11	0.5205	Slc7a6os
0.04448	27.32	23.74	1.14e-05	0.5202	Micos10
0.04446	20.5	16.37	8.783e-09	0.5221	Eloc
0.04443	36.91	32.63	8.41e-06	0.5228	Slc25a5
0.04442	31.79	28.3	6e-05	0.52	Ern1
0.04438	31.24	27.69	0.0001469	0.519	Tspan9
0.04437	27.52	23.1	2.496e-07	0.5229	Txlna
0.04436	9.944	5.367	2.987e-24	0.5233	Gm49692
0.04433	18.05	13.84	4.624e-10	0.5221	Ubald1
0.04432	49.46	45.23	0.0001048	0.5224	Wdr1
0.04432	59.17	54.59	0.004425	0.5185	Zmynd8
0.04431	8.014	3.891	2.171e-25	0.5208	Gm49393
0.04431	23.16	18.69	5.398e-09	0.5235	Cln5
0.0443	61.42	57.59	0.01838	0.5164	Ambra1
0.04426	15.47	10.91	3.586e-13	0.5231	Usp11
0.04424	65.87	61.25	0.004167	0.5189	Kmt2d
0.04419	50.45	47.35	0.0015	0.5194	Tpp2
0.04405	41.77	37.33	8.379e-06	0.5238	Arpc4
0.04404	16.35	11.91	2.883e-12	0.523	Zfp513
0.04402	22.2	17.83	5.932e-09	0.5231	Hmgcl
0.04401	16.47	12.28	7.65e-11	0.5219	Rnft1
0.04398	14.21	9.862	1.526e-13	0.5224	Pirb
0.04392	7.4	2.928	3.521e-37	0.5226	Plekha4
0.04391	16.53	12.88	1.707e-08	0.5196	Trp53inp1
0.04391	24.54	20.33	2.56e-07	0.5218	ENSMUSG00000120676
0.04391	37	33.19	1.896e-05	0.5222	Hnrnpf
0.0439	82.74	78.24	0.2645	0.5112	Cdc42
0.0439	66.04	62.31	0.022	0.5163	Atf7ip
0.04389	47.44	43.46	0.001056	0.5195	Pak1
0.04385	73	68.95	0.04414	0.5152	Trip12
0.04381	27.93	23.99	1.113e-05	0.5203	Luzp1
0.04379	32.7	28.67	0.0001214	0.5194	Nt5dc1
0.04376	20.62	15.89	8.656e-11	0.5243	Tspyl1
0.04375	49.14	45.85	0.01344	0.5162	Galnt7
0.04373	31.56	27.07	9.053e-07	0.5233	Coro1c
0.04367	47	43.71	0.001767	0.5188	Ppp4r1
0.04364	12.75	8.401	2.996e-15	0.5222	Pttg1
0.04364	28.93	26.58	0.01216	0.5139	Zc3h12b
0.0436	14.3	9.993	4.379e-13	0.5221	P2ry10b
0.04354	34.4	30.83	8.329e-05	0.5203	Sh3tc1
0.04342	37.73	34.52	0.000879	0.5185	Ube2w
0.04339	37.73	34.05	6.162e-05	0.5212	Casc3
0.04339	47.03	44.03	0.001704	0.5189	N4bp2l2
0.04333	47.79	44.15	0.0003296	0.5209	Snn
0.0433	75.14	70.15	0.2455	0.5113	Ankrd17
0.04329	8.014	3.492	6.066e-33	0.5228	D730003I15Rik
0.04326	20.65	16.87	3.144e-07	0.5202	Nod1
0.04326	25.27	22.09	3.529e-05	0.5188	Pofut1
0.04322	35.39	32.28	0.0006534	0.5184	Lrrfip2
0.04322	52.88	49.53	0.0008634	0.5203	Tcf25
0.04319	45.01	41.84	0.002145	0.5184	Atxn10
0.04316	42.23	38.29	0.0001929	0.5208	Smox
0.0431	19.22	15.68	5.611e-07	0.5192	Dhx32
0.04307	39.98	35.89	8.608e-05	0.5212	Mroh1
0.04301	8.248	4.158	4.413e-24	0.5208	Gm12861
0.043	52.82	48.91	0.008774	0.5171	Kansl1l
0.043	60.81	56.75	0.009333	0.5175	Med13
0.04294	5.879	1.099	1.038e-81	0.5239	Maff
0.04289	49.2	45.37	0.0001659	0.5219	Cic
0.04281	11.23	6.733	4.16e-19	0.5227	Cebpd
0.04271	13.07	8.935	2.424e-13	0.5213	Angptl7
0.04268	42.47	39.64	0.004297	0.5172	BC035044
0.04264	13.51	10.01	2.227e-09	0.5186	Gm15850
0.04264	45.22	41.52	0.0005216	0.5201	Ppp1cb
0.04263	68.73	65.5	0.06515	0.5144	Rbm47
0.04256	8.95	4.732	5.222e-23	0.5215	Ctla2b
0.04256	46.18	41.9	0.0007047	0.5198	Rlf
0.04248	23.78	19.92	5.722e-07	0.5211	Lyl1
0.04231	8.599	4.435	1.134e-23	0.5212	Dhrs11
0.0423	32.26	29.36	0.003669	0.5159	Hpcal1
0.04224	13.07	8.577	6.978e-16	0.5229	Klhdc8b
0.04222	43.64	39.66	0.0001323	0.5214	Map7d1
0.0422	24.19	19.61	1.079e-08	0.5236	Snap29
0.04216	24.89	20.61	1.379e-07	0.5224	Cldnd1
0.04214	63.38	60.16	0.02979	0.5157	Cnot4
0.04211	11	6.743	1.543e-17	0.5217	Zfp719
0.0421	37.23	33.55	0.000703	0.5186	Dock9
0.04207	63.29	58.62	0.007583	0.5179	Klf3
0.04198	29.66	26.67	0.0008482	0.517	Prune2
0.04196	6.61	2.187	2.574e-45	0.5222	Cntnap5a
0.04192	26.41	22.71	6.645e-06	0.5203	Nrbp1
0.04175	47.7	43.46	0.0006142	0.5201	Lgals8
0.04175	43	39.99	0.006655	0.5166	Gm4258
0.04169	11.29	7.267	6.09e-15	0.5206	Tgif2
0.04164	59.84	55.74	0.02518	0.5158	Eri3
0.04163	20.39	16.59	3.188e-07	0.52	Slamf6
0.04159	84.64	79.83	0.6826	0.5082	Mtdh
0.04155	59.46	55.99	0.01152	0.5171	Hmgb1
0.04153	14.04	10.41	1.643e-09	0.519	Gm16201
0.04146	67.42	63.46	0.03318	0.5156	Larp4b
0.04142	27.64	24.09	1.453e-05	0.5201	Acox1
0.04142	56.74	52.33	0.0009181	0.5205	Prkar1a
0.04141	35.07	31.06	4.334e-05	0.521	Zbtb4
0.04131	48.49	44.2	0.0006135	0.5202	Arglu1
0.04129	45.22	41.91	0.002848	0.518	Braf
0.04121	23.16	19.73	1.029e-05	0.5189	Mtmr14
0.04121	64.11	59.47	0.03204	0.5155	Tns1
0.04118	45.25	42.25	0.005533	0.5171	Gm28047
0.04117	11.58	7.524	1.21e-14	0.5207	Ubl4a
0.04117	41.91	37.85	7.37e-05	0.5217	U2af2
0.04116	60.25	56.12	0.008543	0.5176	Thoc2
0.04114	72.24	67.62	0.1811	0.512	Wdfy2
0.04113	34.75	31.16	0.0005132	0.5185	Abcb4
0.0411	44.75	41.05	0.0007645	0.5196	Vps4b
0.04109	21.85	18.34	1.801e-05	0.518	Zfp827
0.04109	37.12	33.92	0.0006981	0.5186	Ptprs
0.04108	40.04	36.24	0.0001362	0.5208	Elavl1
0.04104	22.05	18.44	1.622e-06	0.5198	Fem1c
0.04103	26.35	22.95	2.677e-05	0.5193	Zc3h15
0.041	73.44	69.12	0.2627	0.5111	Snd1
0.04098	50.07	46.01	0.00031	0.5212	M6pr
0.04087	22.58	18.78	7.141e-07	0.5205	Ppp4c
0.04084	9.184	5.115	6.652e-20	0.5206	Gm33370
0.04083	5.82	1.376	9.401e-63	0.5222	ENSMUSG00000120387
0.04083	11.58	7.685	1.447e-13	0.5201	Ntmt1
0.04081	26.41	23.29	7.872e-05	0.5184	Golph3
0.04081	49.2	45.42	0.0003278	0.5211	Tmed5
0.04078	20.82	17.11	6.914e-07	0.5198	Gdap2
0.04074	12.14	8.154	9.583e-13	0.52	Mid1
0.04074	16.17	12.65	1.352e-07	0.5184	Prox1
0.04074	29.89	26.26	2.808e-05	0.5202	Fmr1
0.04072	21.82	18.39	3.838e-06	0.5192	Fhod1
0.04072	78.15	72.73	0.1431	0.5126	Eef2
0.04071	39.54	35.77	0.0001644	0.5205	Zbtb7a
0.04067	19.51	16.61	0.0003247	0.5151	Lypd6
0.04066	25.71	22.08	1.49e-05	0.5195	Osbpl2
0.04062	51.83	48.66	0.0103	0.5168	Ppp2r5e
0.04058	42.88	38.77	0.0001093	0.5214	Zbtb18
0.04058	61.71	58.21	0.03171	0.5155	Kmt2a
0.04057	59.78	55.27	0.02779	0.5156	Rb1
0.04053	26.44	22.56	7.225e-06	0.5202	Zkscan1
0.04051	51.89	48.02	0.002236	0.5189	Etv5
0.0405	31.03	27.25	1.777e-05	0.5209	Snx17
0.04047	14.86	10.7	1.934e-11	0.5212	Plpbp
0.04047	33.72	29.4	8.177e-06	0.5221	Srrt
0.04045	44.84	40.82	0.0001767	0.5212	Ghitm
0.04044	5.469	1.089	2.231e-71	0.5219	Gm47794
0.04044	47.06	43.62	0.00353	0.5179	Srek1
0.04043	54.49	50.51	0.003716	0.5184	Lgals9
0.0404	54.05	50.69	0.01915	0.516	Epb41
0.04038	44.9	41.03	0.0004374	0.5202	Chmp4b
0.04035	32.93	28.93	1.561e-05	0.5214	Arpc3
0.04033	18.63	14.98	1.188e-07	0.5198	Gm50035
0.04028	6.201	2.278	1.438e-35	0.5198	Gm28187
0.04028	48.52	45	0.002021	0.5188	Luc7l3
0.04027	57.36	53.79	0.01624	0.5164	Tasor
0.04026	6.756	2.792	1.203e-30	0.5199	Hspa1b
0.04026	35.1	31.43	0.0001019	0.5202	Akap8
0.04026	39.6	36.33	0.0006286	0.5191	Tardbp
0.04023	51.24	47.65	0.001285	0.5196	Arhgef1
0.04022	22.55	18.17	1.742e-08	0.5226	Arf6
0.0402	24.83	20.58	2.123e-07	0.5221	Atp6v1d
0.0402	23.84	21.75	0.01498	0.5126	Hspa12a
0.04018	32.7	29.04	5.248e-05	0.5203	Dnase2a
0.04011	21.53	19.17	0.001857	0.5143	D130040H23Rik
0.0401	7.341	3.22	1.653e-29	0.5207	Lipc
0.04	22.05	18.54	5.473e-06	0.519	Trak2
0.03999	29.42	25.71	1.937e-05	0.5204	Gtpbp2
0.03999	29.69	26.27	6.503e-05	0.5194	Tug1
0.03999	37.06	33.84	0.001057	0.5181	Wdr20
0.03992	18.37	14.69	1.185e-07	0.5197	Prr14
0.03992	99.39	99.02	0.0004192	0.5227	Actb
0.03991	13.45	9.555	4.924e-11	0.5198	Dynll1
0.03983	98.92	97.03	1	0.5028	Mertk
0.03981	6.376	2.041	9.762e-46	0.5217	Tnfrsf12a
0.0398	34.75	31.22	0.0004341	0.5187	Crybg3
0.0397	27.43	23.7	1.453e-05	0.52	Azi2
0.03968	47.24	43.97	0.01247	0.5161	Scmh1
0.03968	65.66	61.48	0.06631	0.5143	Vrk2
0.03964	37.79	35.33	0.01469	0.5149	Fam219a
0.03962	27.41	24.11	6.139e-05	0.5189	Rnf41
0.03962	24.42	21.62	0.0006115	0.5161	Zc3h12c
0.03961	34.19	30.89	0.0005275	0.5184	Nfx1
0.03959	31.76	28.28	0.0001813	0.519	Malt1
0.03959	58.99	54.74	0.004895	0.5183	Rp2
0.03955	33.2	29.56	6.242e-05	0.5203	Ypel3
0.03949	26.91	22.41	2.058e-07	0.5228	Tspan31
0.03947	7.809	3.8	9.663e-25	0.5203	Cdkl4
0.03947	21.79	18.63	4.781e-05	0.5174	Spns2
0.03945	10.38	6.441	1.147e-15	0.5201	Snrpc
0.03944	6.932	3.114	2.659e-26	0.5192	Gm28981
0.03942	28.55	25.18	8.481e-05	0.5189	Khdc4
0.03937	25.24	21.68	1.23e-05	0.5195	Rbbp7
0.03936	47.12	43.1	0.0003094	0.5209	Atp6ap1
0.03935	40.48	36.56	0.0002331	0.5203	Acbd3
0.03935	63.06	58.71	0.04214	0.515	Lcor
0.03933	23.49	20.31	0.0001497	0.517	Fbxo34
0.03928	38.02	34.92	0.005071	0.5164	Kat6b
0.03927	77.27	72.64	0.2239	0.5116	Fam91a1
0.03926	10.3	6.269	1.661e-16	0.5204	Hmox1
0.03924	51.71	48.07	0.002145	0.519	Secisbp2l
0.03918	45.39	41.38	0.000409	0.5204	Hsd17b11
0.03914	23.46	19.43	4.059e-07	0.5212	Map1lc3b
0.03913	43.64	40.58	0.002743	0.5179	Stx16
0.0391	53.64	50.08	0.005136	0.5179	Atp1b3
0.03907	39.37	35.92	0.0005024	0.5193	Ip6k1
0.03907	32.85	29.8	0.001065	0.5174	Maml1
0.03901	9.506	5.619	3.499e-17	0.5198	Zfas1
0.03901	52.5	48.3	0.00492	0.5179	Tut4
0.03899	68.76	65.1	0.02699	0.516	Prrc2a
0.03898	25.5	21	1.739e-07	0.5224	Slc39a10
0.03896	25.33	21.65	6.171e-06	0.52	Stx4a
0.03895	39.57	37.19	0.0247	0.5144	3110082I17Rik
0.03894	8.57	4.304	3.511e-25	0.5216	Actr3-ps
0.03894	56.22	52.69	0.01027	0.5171	Thrap3
0.03893	60.11	56.89	0.06687	0.5141	St3gal3
0.03892	19.86	16.52	4.753e-06	0.5182	Sidt2
0.03892	37.53	33.95	0.0005713	0.5189	Ranbp10
0.0389	39.05	36.06	0.003439	0.517	Camkk2
0.03887	30.65	26.99	3.725e-05	0.5201	Dusp11
0.03886	6.435	2.424	3.358e-35	0.5202	Gm32552
0.03883	94.24	89.95	1	0.5034	Unc93b1
0.03879	30.68	27.08	0.0001065	0.5192	Sqor
0.03878	31.68	28.5	0.0006598	0.5177	Mapk9
0.03871	55.84	51.64	0.002772	0.5189	Pcbp2
0.0387	28.55	24.95	8.205e-05	0.5189	Lrif1
0.0387	98.01	96.64	0.106	0.5137	Marcks
0.03869	20.77	17.13	1.768e-06	0.5192	Por
0.03862	30.65	26.91	3.558e-05	0.5202	Bmf
0.03859	58.79	55.03	0.02252	0.5159	Usp12
0.03857	30.97	26.93	1.566e-05	0.5209	Ppia
0.03854	8.19	5.387	8.512e-10	0.5145	Gm36560
0.03851	62.3	58.78	0.05916	0.5144	Arih1
0.03851	48.29	44.29	0.0008873	0.5198	Lysmd4
0.03847	7.985	4.037	5.786e-23	0.52	Pianp
0.03845	7.312	3.316	5.513e-27	0.52	Klf10
0.03843	79.67	75.09	0.5846	0.5088	Tab2
0.0384	7.166	3.175	5.822e-28	0.52	Arl4a
0.03839	6.756	2.711	1.749e-32	0.5203	Sertad3
0.03838	34.54	30.92	0.0001001	0.5201	Npm1
0.03838	36.12	32.66	0.0004448	0.5189	Hk3
0.03832	11.11	7.418	1.734e-12	0.519	3110056K07Rik
0.03829	77.39	72.79	0.6455	0.5084	Lrrk1
0.03824	33.84	30.88	0.0008538	0.5179	Naip6
0.03819	6.025	1.93	2.943e-43	0.5206	Cks2
0.03819	14.51	10.49	7.644e-11	0.5205	Tmsb10
0.03815	50.34	46.05	0.0009325	0.5199	Lasp1
0.03814	44.16	41.11	0.004904	0.5172	Chd1
0.03812	47.79	44.3	0.001991	0.5187	Hvcn1
0.03811	50.19	47.23	0.01906	0.5157	Nr2c2
0.03809	45.36	42.45	0.00847	0.5166	Tasor2
0.03808	55.43	52.28	0.0261	0.5155	Gatad2b
0.03808	57.39	53.21	0.03414	0.5151	Zfp532
0.03802	30.13	26.93	0.0008787	0.517	Phtf2
0.03799	47.38	43.78	0.002252	0.5185	Ythdf2
0.03797	14.59	10.95	5.893e-09	0.5189	Gmeb2
0.03796	24.95	21.64	0.0001006	0.5177	Thoc2l
0.03796	82.25	77.42	1	0.5054	Clasp2
0.03792	8.424	4.571	8.437e-20	0.5195	Gm9320
0.03787	73.21	69.06	0.2155	0.5116	Pkn1
0.03784	25.71	22.33	8.122e-05	0.5181	Mapk8
0.03782	37.06	34.9	0.02795	0.5139	Stim1
0.03779	12.96	9.182	5.78e-11	0.5194	Paf1
0.03774	21.99	17.76	7.103e-08	0.5216	H2-DMa
0.03771	39.49	36	0.0004204	0.5195	Pip5k1c
0.03771	32.49	29.52	0.001963	0.5167	Gabpb2
0.03768	6.581	2.308	8.611e-41	0.5215	Gm37305
0.03768	43.87	40.68	0.003187	0.5177	Sec24b
0.03767	14.89	11.07	1.562e-09	0.5196	5830432E09Rik
0.03764	14.45	11.03	5.346e-08	0.5178	Anxa4
0.03763	32.64	29.78	0.002226	0.5166	Bmt2
0.03762	23.69	20.13	1.539e-05	0.5188	Hebp1
0.03759	51.92	48	0.001684	0.5193	Ppp6r1
0.03756	15.56	12.01	4.528e-08	0.5186	Tmed2
0.03748	11.79	8.018	6.22e-12	0.5192	Arhgef3
0.03747	48.35	44.61	0.004604	0.5176	Akap8l
0.03738	40.3	37.02	0.002575	0.5175	Lactb2
0.03738	61.54	58.27	0.04865	0.5147	Arhgap30
0.03737	7.546	3.513	1.69e-26	0.5203	9330133O14Rik
0.03737	19.01	16.16	6.801e-05	0.5161	Rbmx
0.03735	49.08	46.56	0.01135	0.5165	Hnrnpd
0.03734	31.71	28.91	0.002274	0.5164	Ipo11
0.03734	28.93	26.33	0.004155	0.5152	Fam222b
0.03733	10.7	7.781	1.416e-07	0.5149	Ptchd1
0.03732	35.36	32.11	0.0005091	0.5187	Slc25a45
0.03729	11.44	7.711	4.707e-12	0.5189	A930007I19Rik
0.03729	65.05	61.56	0.2968	0.5106	2610203C22Rik
0.03725	6.23	2.051	1.414e-42	0.5209	ENSMUSG00000120054
0.03723	11.14	7.317	2.521e-13	0.5195	Patl2
0.03723	27.46	23.89	2.54e-05	0.5196	Cggbp1
0.03722	5.352	1.089	3.356e-68	0.5214	Gm38140
0.03721	33.75	31.56	0.01925	0.514	Pex14
0.03715	5.645	1.648	2.232e-46	0.52	Smim35
0.03714	6.318	1.935	2.869e-48	0.5219	ENSMUSG00000120435
0.03713	19.07	15.74	3.331e-06	0.5181	Atl2
0.0371	26.59	23.14	6.314e-05	0.5186	Tiprl
0.03709	37.53	33.9	0.0002766	0.5196	Mfsd1
0.03709	66.63	62.22	0.02032	0.5164	Serinc1
0.03706	11.76	8.104	1.606e-11	0.5189	Gm20544
0.03704	55.43	52.76	0.06697	0.5139	Aak1
0.03697	47.53	45.29	0.1056	0.5125	Mthfs
0.03695	48.49	45.4	0.01033	0.5165	Btbd7
0.03692	48.55	47.05	0.1353	0.5121	Stx8
0.03692	7.897	4.49	6.068e-16	0.5172	Unc5cl
0.03688	11.2	7.771	1.481e-10	0.5177	Gm45902
0.03687	12.72	8.97	8.634e-11	0.5191	Polr1d
0.03686	5.177	1.33	1.92e-50	0.5193	Gm26826
0.03686	20.47	17.58	0.0001636	0.516	Ppp4r1l-ps - ENSMUSG00000121504
0.03685	51.42	47.89	0.008763	0.517	Mgrn1
0.03678	5.703	1.804	1.654e-41	0.5195	Ninj2
0.03677	32.26	29.5	0.003333	0.516	Rab39
0.03673	11.49	7.711	1.417e-12	0.5194	Zfyve21
0.0367	23.78	20	3.297e-06	0.5199	Mlf2
0.0367	37.44	34.13	0.0007315	0.5186	Smarca5
0.03669	26.03	23.7	0.002951	0.515	Slc45a4
0.03666	31.56	28.41	0.0003725	0.5183	Dlst
0.03662	60.02	56.4	0.07819	0.5137	Fer
0.03662	38.61	34.9	0.0004397	0.5193	Dazap2
0.03662	50.48	46.35	0.005624	0.5175	Naip2
0.03661	46.01	42.95	0.007738	0.5167	Hif1a
0.0366	69.26	64.87	0.3286	0.5104	A630001G21Rik
0.03658	39.11	37	0.07907	0.5124	Agap1
0.03657	5.031	1.089	5.935e-60	0.5197	1700023H06Rik
[truncated: 55,011 more rows]

## Sheet: DE-DAM
logFC	pct_1	pct_2	p_val_adj	auc	gene_names
0.7929	50.09	20.05	6.108e-272	0.6691	Apoe
0.6586	97.27	90.38	4.46e-173	0.6834	Lrmda
0.6253	81.88	55.5	1.434e-169	0.6747	Arhgap24
0.6028	70.04	29.36	0	0.7234	Lyz2
0.5955	99.86	97.31	0	0.7509	Ctsb
0.5845	79.96	47.93	1.559e-243	0.7042	H2-D1
0.5543	92.94	74.08	1.929e-168	0.6797	AU020206
0.537	95.36	83.46	1.471e-127	0.6573	Cadm1
0.4723	73.27	43.98	4.39e-183	0.6739	H2-K1
0.451	91.8	74.53	6.702e-146	0.6673	Ctsz
0.4417	89.71	71.8	1.287e-127	0.6561	Cd9
0.4363	99	95.03	2.375e-157	0.6749	B2m
0.4329	99.59	98.56	1.721e-212	0.7032	Ctsd
0.4167	39.53	4.965	0	0.6738	Clec7a
0.4167	96.58	88.94	4.035e-126	0.6566	Eef1a1
0.4149	77.09	56.28	8.784e-103	0.6362	Apbb2
0.4136	98.63	94.94	1.28e-162	0.6778	Mpeg1
0.4093	89.3	72.26	4.837e-118	0.6502	Ctsl
0.3928	89.39	74.72	6.151e-104	0.6413	Pabpc1
0.3887	91.17	76.95	1.461e-94	0.635	Fth1
0.3829	71.9	50.28	9.035e-116	0.6417	Lag3
0.3811	86.34	67.86	2.29e-95	0.6344	Ftl1
0.3799	64.39	35.94	1.568e-160	0.6549	Cd63
0.3775	70.04	45.93	1.818e-111	0.6367	Rassf3
0.3568	53.19	26.57	8.236e-160	0.6414	Anapc15
0.3475	89.75	79.75	2.086e-64	0.6118	Mitf
0.3453	89.44	75.44	1.861e-87	0.6297	Timp2
0.3303	50.46	22.88	2.645e-175	0.6414	Lgals3bp
0.3296	93.81	81.91	8.459e-88	0.6305	Lamp1
0.3229	34.65	5.535	0	0.6449	Axl
0.3149	83.97	67.2	2.108e-76	0.6202	Npc2
0.309	91.39	79.17	9.352e-69	0.6154	Man2b1
0.3064	92.08	81.55	2.11e-68	0.6153	Grn
0.3016	81.47	67.82	1.676e-45	0.593	Cacna1d
0.3012	86.57	72.26	2.866e-59	0.6066	Gnas
0.2876	99.23	98.43	5.42e-74	0.6202	mt-Rnr1
0.2863	86.52	73.25	1.364e-53	0.6015	Cd84
0.2855	84.47	69.28	4.149e-62	0.6088	Ctsa
0.2834	99.82	99.2	5.952e-114	0.6489	Ctss
0.2817	86.79	73.41	1.561e-62	0.6096	Hexa
0.2815	46.22	22.87	2.209e-130	0.6212	Cpd
0.2792	99.82	99.25	9.489e-80	0.6247	mt-Rnr2
0.2754	64.07	42.22	2.431e-70	0.6066	Cd83
0.2734	98.27	95.1	9.267e-67	0.6142	Lrp1
0.2725	99.18	96.89	7.484e-80	0.6248	Psap
0.2724	50.73	25.24	4.352e-131	0.6259	Sdc3
0.2708	99.54	97.15	6.382e-66	0.6135	C1qa
0.2704	85.61	72.27	1.173e-53	0.6015	Eef2
0.2697	59.7	39.75	5.34e-62	0.5985	Nrp1
0.2684	34.38	15.19	7.684e-113	0.597	Colec12
0.2631	45.49	26.66	1.874e-76	0.5972	Ank
0.261	96.08	89.27	2.145e-34	0.582	Prkcb
0.2583	40.21	19.32	1.445e-113	0.6064	Rftn1
0.2562	98.95	96.63	2.218e-65	0.613	C1qb
0.2544	95.99	87.81	1.073e-37	0.5858	Plek
0.2522	86.38	75.58	2.72e-43	0.5915	Serpine2
0.2519	89.66	78.33	6.676e-40	0.588	Myo1f
0.2505	82.15	66.42	1.817e-46	0.5938	Tyrobp
0.2492	82.51	70.19	2.992e-32	0.5785	Pvt1
0.248	67.03	52.02	3.879e-37	0.5809	Fmnl2
0.2433	92.53	83.46	1.969e-33	0.5808	Cux1
0.2429	87.34	76.36	1.11e-28	0.5745	Lhfpl2
0.2415	68.03	49.59	4.733e-55	0.5976	Dgkz
0.2393	93.31	87.26	1.596e-35	0.5833	Abca1
0.2392	60.2	48.17	2.297e-19	0.5573	Fgf13
0.2377	88.02	76.59	5.225e-32	0.5787	Gna12
0.2375	75.09	58.03	1.245e-48	0.5943	Myo9b
0.2362	25.32	6.774	5.544e-191	0.5933	Cd74
0.2361	29.6	7.03	4.069e-266	0.6137	Itgax
0.2348	48.82	28.46	1.466e-76	0.5995	Npnt
0.2334	40.94	22.52	1.727e-80	0.5942	Myo1e
0.2325	69.9	53.36	2.764e-49	0.5936	Cd68
0.2312	41.94	21.34	9.72e-100	0.6032	Epb41l3
0.2264	90.12	79.89	6.98e-30	0.5762	Asph
0.2251	65.07	47.75	2.948e-46	0.5888	Slc12a2
0.2245	94.76	89.17	4.159e-30	0.5767	Ppm1h
0.2201	60.06	41.66	1.678e-55	0.5943	Hif1a
0.2194	77.78	61.81	3.846e-39	0.5854	Rpl4
0.2185	49.5	28.37	6.353e-84	0.6041	Pld3
0.2109	81.92	67.57	3.369e-31	0.577	Cotl1
0.2107	97.68	93.73	1.755e-37	0.5857	C1qc
0.2102	61.25	44.93	7.913e-36	0.5771	Gatm
0.2089	68.58	54.78	8.913e-32	0.5755	Fnip2
0.2087	80.37	67.94	8.678e-27	0.5713	Abr
0.2084	80.33	69.77	2.687e-26	0.5708	Pnpla7
0.2081	36.29	16.21	1.858e-114	0.6002	Ly9
0.2073	52.23	31.96	2.127e-67	0.5967	Aplp2
0.2071	38.3	26.83	4.769e-28	0.5586	Prkg1
0.2046	74.13	60.77	3.101e-33	0.5784	Dpy19l4
0.2039	70.86	54.01	2.326e-38	0.5828	Tpd52
0.2038	72.59	59.31	1.202e-30	0.575	Gsap
0.2034	25.73	7.434	2.447e-172	0.5916	Myo5a
0.2033	96.04	90.1	4.747e-33	0.5804	Gns
0.2019	29.51	16.78	1.554e-44	0.5625	Arhgap15
0.2003	65.44	47.63	2.087e-45	0.5879	Creg1
0.1986	31.38	13.57	5.176e-104	0.589	Lrguk
0.1937	96.08	89.49	1.882e-22	0.5662	Ptprc
0.1924	63.07	46.06	8.964e-42	0.5837	Gusb
0.1907	87.75	77.67	3.163e-20	0.5625	Wipf1
0.1903	60.79	44.83	7.554e-34	0.5749	Galnt7
0.1897	65.62	47.17	9.01e-43	0.5852	Rps4x
0.1882	75.64	59.34	6.666e-32	0.5766	Ppt1
0.1876	64.44	47.31	6.825e-39	0.5813	Pea15a
0.1868	29.87	11.74	4.712e-118	0.5899	Csf1
0.1867	64.34	47.3	1.226e-40	0.5831	Rpl3
0.1867	59.2	45.01	2.304e-30	0.5709	Arid5b
0.1865	53.1	35.8	1.651e-50	0.5864	Pkm
0.186	93.85	86.99	5.522e-23	0.5669	Myh9
0.1859	96.31	91.09	1.249e-27	0.5735	Cd81
0.1859	88.16	81.33	4.11e-22	0.5655	Sipa1l2
0.1851	47.31	30.22	6.179e-48	0.5801	Niban1
0.1832	66.03	51.44	1.409e-31	0.5744	Lyst
0.1831	57.47	43.51	3.423e-22	0.56	Cacna1a
0.1828	84.65	75.93	9.439e-18	0.5585	Man1c1
0.1827	61.98	44.64	8.343e-42	0.5832	Gm2a
0.1822	82.74	71.32	4.427e-20	0.562	Ptk2b
0.182	73.54	59.29	1.64e-26	0.5698	Ncl
0.182	75.46	62.46	1.046e-22	0.565	Cd180
0.1808	65.03	48.31	1.441e-34	0.5769	C3ar1
0.1805	82.79	69.96	6.115e-20	0.5616	Oxct1
0.1801	71.72	56.8	1.904e-28	0.5718	Ptms
0.1797	57.42	39.25	2.087e-45	0.584	Rpl23
0.1776	56.24	40.66	7.778e-34	0.5731	Eya4
0.1769	82.19	71.2	2.789e-23	0.5667	Ctsh
0.1759	60.02	44.45	8.333e-34	0.5747	Abcg1
0.1754	28.55	9.451	3.548e-153	0.5947	Nceh1
0.1744	68.49	54.81	1.021e-27	0.5705	Slc6a6
0.1741	65.21	49.52	4.005e-33	0.5756	Rpl13a
0.1735	61.75	51.95	8.054e-12	0.5454	Immp2l
0.1732	50.91	34.4	8.204e-42	0.5777	Tbc1d8
0.172	27.09	12.32	6.551e-79	0.5742	St8sia6
0.1719	64.25	47.83	3.822e-33	0.5751	mt-Cytb
0.1719	90.8	81.74	2.583e-17	0.558	Trf
0.1717	60.06	42.07	1.244e-39	0.5799	mt-Co1
0.1711	99.27	97.71	6.4e-37	0.585	Itm2b
0.1708	77.09	68.79	8.833e-09	0.5406	Wwox
0.1707	71.36	57.04	1.021e-27	0.5709	Sgpl1
0.1705	49.36	31.16	2.404e-52	0.5845	Rpl32
0.1704	21.86	7.173	8.071e-118	0.5735	Xylt1
0.1704	66.62	54.21	3.035e-20	0.56	Prkch
0.1697	82.83	72.12	4.437e-19	0.5604	Ly6e
0.1695	65.48	52.17	3.189e-23	0.5639	St6gal1
0.1695	98.27	95.07	2.876e-22	0.5659	Dst
0.1688	91.39	83.86	3.875e-14	0.5524	Skap2
0.1687	86.38	75.89	2.659e-19	0.561	Trem2
0.1685	92.62	86.91	1.345e-17	0.5585	Gm19951
0.1679	96.22	91.73	7.991e-14	0.5519	Gab2
0.1674	75.91	64.03	4.796e-19	0.5597	Znrf2
0.167	45.49	31.11	3.892e-35	0.569	Cers6
0.1668	66.99	50.87	2.449e-30	0.5728	Os9
0.1655	55.69	38.13	3.999e-42	0.5803	Rps8
0.1649	59.24	43.54	3.252e-32	0.5725	Rassf4
0.163	70.22	56.34	6.063e-25	0.5671	Chd4
0.1618	33.79	19.36	4.03e-51	0.5708	Gm13710
0.1616	48.5	31.1	3.224e-49	0.5819	Rps5
0.1612	92.99	85.89	6.18e-14	0.5521	Tns3
0.1611	64.3	49.91	3.614e-28	0.5698	Syngr1
0.1602	89.66	80.44	1.035e-16	0.5569	Lamp2
0.1594	62.57	47.59	1.211e-27	0.5685	Frrs1
0.1585	62.52	47.02	4.483e-30	0.5713	Atp6v1c1
0.1579	61.07	44	3.561e-35	0.576	Akr1a1
0.1575	79.83	68.2	2.21e-17	0.5574	Dync1h1
0.1568	48.59	31.71	1.692e-45	0.5792	Rplp0
0.1566	66.76	49.9	1.942e-29	0.5714	Cyba
0.1563	46.99	30.54	1.083e-43	0.5767	Daam1
0.1554	95.45	90.4	7.26e-10	0.5437	Ly86
0.1534	50.96	34.98	4.598e-39	0.5754	Plekha1
0.1532	57.97	41.97	1.708e-32	0.5722	Rpl18a
0.1532	89.03	79.74	1.946e-15	0.5547	Plxnb2
0.153	95.81	92.25	1.749e-12	0.5493	Il31ra
0.1519	77.19	63.29	5.319e-19	0.5595	Itgb2
0.1503	48.36	33.5	2.26e-34	0.5698	Nrp2
0.1502	56.15	40.24	3.502e-33	0.5722	Fau
0.1493	57.47	43.59	4.55e-26	0.5651	Vps13c
0.1482	40.39	23.56	1.769e-54	0.5786	Bcl2a1b
0.1478	69.44	56.94	2.403e-17	0.556	Pfkfb3
0.1473	87.7	78.69	7.488e-11	0.5457	Tbc1d22a
0.1469	84.61	78.05	2.037e-07	0.5375	Smyd3
0.1459	42.44	26.19	8.613e-49	0.5771	Coro1c
0.1457	92.08	85.86	1.77e-14	0.5531	Msn
0.1453	85.11	75.13	4.93e-11	0.546	Extl3
0.1452	52.37	39.41	1.172e-25	0.563	Cpeb2
0.145	51.78	34.59	7.894e-40	0.576	Rpl13
0.1443	65.16	51.41	1.255e-21	0.5614	Eif3a
0.144	70.4	59.09	8.423e-16	0.5537	Tns1
0.1437	41.44	24.4	4.842e-55	0.58	Gaa
0.1436	53.1	38.14	1.049e-29	0.5673	Sorl1
0.1434	82.38	70.91	5.262e-13	0.5498	Ctsc
0.1428	45.9	30.19	6.043e-40	0.573	Aldoa - ENSMUSG00000030695
0.1428	58.11	42.86	6.066e-28	0.5672	Rplp1
0.1426	59.79	44.95	2.587e-24	0.5634	Ppard
0.1423	75.68	62.93	9.54e-16	0.5541	Cfl1
0.1413	56.1	40.62	1.327e-30	0.5695	Rps3
0.1413	87.52	81.59	7.003e-08	0.5388	Magi1
0.1408	91.26	84.95	1.579e-11	0.5473	Csf3r
0.1407	48.32	34.54	5.039e-30	0.5658	Usp35
0.1406	30.28	14.88	2.793e-70	0.5754	H2-Q4
0.1402	81.06	70.2	4.388e-10	0.5437	Acer3
0.14	43.62	27.25	2.27e-45	0.5753	Rpl41
0.14	61.98	46.62	4.267e-26	0.5662	Rpl21
0.1398	33.79	17.21	2.482e-70	0.5798	Fblim1
0.1398	66.03	52.57	8.567e-20	0.559	Slc23a2
0.1396	66.94	54.4	4.634e-18	0.5567	Usp12
0.1392	42.76	25.89	1.043e-49	0.5776	Rpsa
0.1389	58.38	46.1	3.511e-16	0.5519	Akt3
0.1389	72.72	61.85	1.705e-11	0.546	Lpp
0.1387	60.25	45.4	7.588e-25	0.5642	Ybx1
0.1387	83.47	72.92	1.655e-11	0.5469	Scarb2
0.1382	68.31	59.93	1.284e-08	0.5395	Kcnma1
0.1378	82.88	74.1	3.564e-11	0.5462	Rbm25
0.1376	51.96	36.43	4.118e-32	0.5691	Eif4b
0.1366	45.54	30.43	1.543e-35	0.569	Dnajb14
0.1363	62.43	50.27	5.754e-16	0.5525	Bcl2l1
0.1355	84.84	77.87	1.089e-08	0.5407	Pitpnc1
0.1352	56.65	41.73	6.165e-27	0.5656	Soat1
0.1351	50.23	35.85	6.98e-30	0.5663	Rpl17
0.1348	57.83	43.06	9.172e-26	0.5646	Sdf4
0.1346	16.67	3.375	2.016e-171	0.5665	Rai14
0.1346	46.27	30.25	1.597e-38	0.5718	Rpl26
0.1342	18.9	7.097	6.499e-79	0.5591	Ptchd1
0.1337	77.5	68.29	5.455e-09	0.5411	Gtdc1
0.1329	39.89	25.78	4.502e-37	0.5667	Prune2
0.1327	71.08	58.42	2.002e-16	0.5547	Arhgdia
0.1316	47.22	32.45	6.33e-34	0.5687	Gltp
0.1314	49.13	32.85	6.421e-36	0.571	Rack1
0.1312	45.54	28.85	6.582e-43	0.5747	Rps12
0.1309	74.04	64.62	8.038e-10	0.5427	Kcnk13
0.1308	51.87	36.2	1.579e-30	0.5673	Rplp2
0.1299	48.59	33.62	1.221e-32	0.5681	Rpl14
0.1298	55.1	40.5	1.723e-25	0.5633	Rps23
0.1297	63.11	51.21	9.825e-14	0.5488	Nsmce2
0.1296	81.01	73.42	7.168e-08	0.5385	Snx24
0.1293	44.22	29.56	3.71e-34	0.567	Rab11fip5
0.1292	74.45	61.88	1.402e-13	0.5501	Ucp2
0.129	57.92	44.02	6.675e-23	0.5612	Nucb1
0.1288	54.19	41.77	1.224e-19	0.5559	Traf3
0.1288	62.16	50.73	2.791e-16	0.5531	Elf2
0.1287	87.34	80.07	8.503e-08	0.5385	Cmip
0.1283	78.83	69.09	1.766e-10	0.5445	Adgre1
0.1279	48.54	36.94	4.44e-21	0.556	Rufy3
0.1271	59.65	45.07	2.988e-23	0.562	Tgoln1
0.1269	82.7	74.02	2.747e-09	0.542	Dnmt3a
0.1268	59.84	45.95	2.505e-22	0.561	Rnf213
0.1266	48.82	34.1	3.056e-29	0.5647	Atp6v1a
0.1263	50.64	36.26	1.313e-26	0.5628	Cd34
0.1261	30.78	15.92	2.45e-61	0.5722	Ptgfrn
0.1255	55.05	40.56	1.346e-23	0.5609	Tent5c
0.1254	84.24	73.8	6.8e-10	0.5434	Asah1
0.1253	45.13	32.66	2.541e-22	0.5556	Gm26740
0.1252	54.51	40.99	1.183e-21	0.5584	Coro7
0.1251	46.36	34.56	7.89e-20	0.5533	Aig1
0.125	64.48	50.09	5.565e-19	0.5573	Tpp1
0.1244	54.83	44.65	1.639e-13	0.547	Mthfs
0.1243	48.18	33.73	4.621e-30	0.5654	Rpl5
0.1242	80.97	69.58	7.706e-09	0.5408	Atp2b1
0.1234	51.96	37.25	2.33e-27	0.5642	Man2b2
0.1231	61.93	47.47	3.86e-20	0.5584	Rps9
0.1222	45.67	31.47	3.805e-30	0.5641	mt-Nd5
0.1222	57.33	44.37	2.419e-19	0.5563	Dhrs3
0.1221	42.17	27.06	5.407e-38	0.5687	Rpl22
0.122	38.62	26.02	5.598e-29	0.559	Plpp1
0.1216	83.38	73.92	2.46e-09	0.5421	Havcr2
0.1214	63.93	49.83	6.112e-19	0.5571	Bsg
0.1211	51.37	38.76	2.179e-20	0.5558	Ankrd12
0.1211	67.99	55.56	8.6e-15	0.5515	Csde1
0.1211	68.81	57.42	1.896e-09	0.5412	Cdk14
0.121	83.47	74.51	7.373e-08	0.5386	Anxa3
0.1209	55.05	41.25	2.848e-23	0.5607	Slc38a10
0.1207	81.56	71.32	5.514e-08	0.5388	Stard9
0.1195	34.06	21.32	5.319e-36	0.5614	Tlr2
0.1195	68.35	56.48	2.208e-13	0.5491	Ptma
0.1195	70.63	59.26	5.128e-11	0.5448	Slc15a3
0.1194	45.17	30.52	2.64e-32	0.5658	Rps11
0.1193	62.07	50.47	5.485e-14	0.5492	Snx30
0.1192	41.76	26.8	1.473e-37	0.5681	Rps7
0.119	21.68	12.91	1.924e-27	0.5438	Marchf3
0.1176	57.1	42.3	1.066e-23	0.5617	Atp6ap1
0.1174	79.51	71.04	3.562e-08	0.5392	Map4
0.1173	48.18	33.36	3.928e-28	0.5631	Neat1
0.1172	48.68	36.45	6.696e-21	0.5556	Dtnbp1
0.117	43.94	29.57	5.651e-31	0.5638	Rps27a
0.117	45.63	31.95	4.206e-27	0.561	P2rx4
0.1167	95.9	92.46	7.006e-09	0.5414	Abhd12
0.1166	15.07	2.392	1.627e-199	0.5635	Cst7
0.1166	86.29	76.38	3.582e-07	0.5368	Cap1
0.1166	83.47	74.68	3.207e-06	0.5341	Cd86
0.1165	29.51	16.13	2.471e-48	0.5642	Cxcl16
0.1165	62.61	50.28	8.518e-15	0.5505	Ddi2
0.1165	81.33	70.47	9.987e-09	0.5406	Rhoa
0.1162	36.52	24.2	2.624e-28	0.5569	Fmn1
0.1162	48.04	35.29	2.789e-23	0.5582	Mroh1
0.1162	71.08	61.66	1.177e-07	0.5373	Chst11
0.1161	66.26	52.82	1.029e-13	0.5491	Tpr
0.1152	76.05	65.82	1.077e-08	0.5402	Clint1
0.1148	42.03	26.17	1.441e-40	0.5703	Rpl6
0.1148	44.99	30.1	1.378e-31	0.5648	Rps14
0.1147	48.54	33.76	1.983e-27	0.5625	Rps29
0.1147	54.37	42.37	5.161e-16	0.5506	Gng12
0.1147	76.37	65.74	5.015e-11	0.5454	Fcer1g
0.1142	98.36	97	1.959e-07	0.5377	Tmcc3
0.1142	93.21	88.43	4.6e-06	0.5338	Gnaq
0.1139	94.95	90.88	2.835e-05	0.5314	Gm15564
0.1137	37.89	25.89	4.625e-26	0.5558	Ccr6
0.1137	69.54	59.35	1.073e-09	0.542	Lrrc8d
0.1135	99.82	99.76	1.216e-18	0.5603	Camk1d
0.1134	93.31	86.92	2.146e-06	0.5348	Cltc
0.1132	15.71	3.902	6.317e-125	0.559	Fgr
0.1128	37.89	26.53	4.278e-23	0.5529	Slc16a10
0.1128	53.14	40.19	6.803e-20	0.5557	Appl2
0.1128	56.65	43.58	7.105e-18	0.5539	Hvcn1
0.1127	40.26	25.24	1.601e-38	0.5676	Rpl12
0.1126	73.68	62.43	1.228e-11	0.5464	Itm2c
0.1125	89.03	81.65	3.072e-05	0.5312	Sh3kbp1
0.1122	44.63	30.08	1.115e-30	0.5638	Npm1
0.1116	52.91	40.94	1.266e-17	0.5526	Plgrkt
0.1115	58.06	45.8	1.715e-15	0.5507	Abcd2
0.1112	46.77	32.71	5.835e-27	0.5613	Rps24
0.1107	58.7	45.35	4.114e-17	0.5532	Pon3
0.1106	57.42	46.21	4.24e-12	0.5448	Stx8
0.1104	53.1	39.6	3.398e-20	0.5559	Pbxip1
0.11	35.15	20.9	8.617e-42	0.5659	Rps19
0.1095	35.97	24	2.93e-27	0.5556	Uty
0.1094	39.66	26.16	2.393e-31	0.5616	Scpep1
0.1093	44.17	30.62	1.924e-27	0.5606	Rpl11
0.1092	44.67	29.64	2.237e-31	0.5643	Rpl37
0.109	47.86	33.93	4.311e-25	0.5598	Rpl10
0.1089	41.67	29.81	1.71e-23	0.5555	Plekhm2
0.1086	62.39	52.72	9.763e-11	0.5433	Vps54
0.1081	41.94	29.44	8.099e-24	0.5557	Ildr2
0.108	16.07	3.712	3.91e-140	0.5616	Gm13391
0.108	62.25	49.39	3.277e-14	0.5494	Atp1b3
0.1079	46.95	33.22	1.098e-25	0.5601	mt-Nd1
0.1077	83.42	75.06	0.0001785	0.5284	Zcchc7
0.1075	64.39	50.99	2.3e-14	0.55	Pcbp2
0.1073	40.85	26.7	3.387e-32	0.5629	Glb1
0.1072	93.17	88.66	2.129e-07	0.5376	Canx
0.1068	65.21	53.21	5.98e-13	0.5478	Arpc1b
0.1066	100	99.91	9.716e-05	0.5295	Cdk8
0.1064	54.19	41.04	8.892e-19	0.5544	BC005537
0.1063	46.08	33.37	3.861e-22	0.5558	Manba
0.1063	67.67	55.51	9.34e-12	0.5458	Rab7
0.1062	46.49	33.17	8.643e-25	0.559	Mfsd1
0.1062	39.03	26.96	6.982e-24	0.5542	Lsp1
0.1062	52.73	40.41	2.327e-17	0.5521	Snx10
0.106	68.44	56.87	1.072e-10	0.5438	Npc1
0.1059	94.08	90.66	2.226e-05	0.5317	Diaph2
0.1057	26.37	17.13	9.596e-23	0.5446	Mgmt
0.1057	60.93	51.12	2.301e-11	0.5443	Tmem104
0.1054	35.75	22.45	1.055e-33	0.5606	Parvb
0.1054	86.61	78.1	2.405e-05	0.5314	Capzb
0.1052	52.09	39.51	4.341e-18	0.5529	Slc38a1
0.105	78.37	69.13	3.935e-06	0.5336	Rcbtb2
0.1046	41.3	28.38	3.55e-27	0.5588	Gpi1
0.1046	59.43	48.34	1.771e-13	0.5478	Acox3
0.1046	65.57	55.38	4.436e-09	0.5401	Eri3
0.1045	11.25	1.424	1.799e-180	0.5492	Lpl
0.1045	57.47	44.04	1.269e-16	0.5521	Atp1a1
0.1042	98.63	97.1	3.095e-07	0.5372	Tmsb4x
0.1038	46.4	32.44	1.4e-24	0.5584	Tpt1
0.1038	56.65	45.21	6.62e-14	0.5479	Trak1
0.1037	62.98	50.28	4.342e-13	0.5475	Eif4a1
0.1037	59.88	48.85	1.845e-11	0.5441	Tspan7
0.1036	31.1	19.58	5.251e-31	0.5551	Gnptab
0.1035	39.75	25.94	5.467e-32	0.562	Rpl7
0.1034	47.72	35.34	1.4e-20	0.5547	Pip5k1c
0.1034	58.38	47.68	1.261e-12	0.5461	Gls
0.1033	32.51	19.06	2.221e-41	0.5633	Naglu
0.1029	89.98	84.15	0.000336	0.5275	Exoc4
0.1028	42.03	28.28	1.761e-28	0.5602	Dnase2a
0.1028	54.6	42.06	5.925e-16	0.5504	Padi2
0.1027	46.4	34.28	1.855e-19	0.5527	Bri3
0.1025	59.79	48.03	9.928e-14	0.5482	Arap1
0.1023	39.98	26.4	6.635e-30	0.5603	Rpl23a
0.1021	53.37	41.19	6.119e-16	0.5501	Rbpj
0.1021	99.86	99.78	0.0001673	0.5287	Lars2
0.1018	86.93	80.94	8.823e-06	0.5329	Calr
0.1015	47.5	34.93	1.307e-20	0.5545	Csf2rb
0.1013	35.2	22.33	2.272e-33	0.5601	mt-Nd4
0.1012	56.33	44.65	2.704e-14	0.5484	Adcy7
0.101	57.74	53.51	0.001173	0.5242	Atp8a2
0.1009	94.76	90.56	7.072e-05	0.53	Filip1l
0.1008	63.43	52.23	1.218e-09	0.5409	Suclg2
0.1008	93.76	88.68	8.517e-05	0.5297	Tgfbr2
0.1006	84.38	75.94	3.703e-05	0.5308	Efhd2
0.1002	72.27	62.79	6.354e-07	0.5354	Fnip1
0.09982	58.52	45.75	9.567e-14	0.5477	Naip2
0.09952	42.58	30.93	1.467e-20	0.5525	Flna
0.09929	72.36	64.26	5.08e-06	0.533	Tec
0.09922	27.73	16.05	6.544e-37	0.5558	Cd52
0.09917	48.45	35.24	2.523e-21	0.5556	Adipor1
0.09896	54.46	41.93	2.961e-16	0.5509	Washc2
0.09894	44.81	34.74	3.277e-14	0.5451	Fam219a
0.09879	48.41	35.08	4e-21	0.5553	Lipa
0.09848	62.7	50.79	2.255e-11	0.5443	Wls
0.09846	35.29	23.75	5.918e-26	0.554	Cd48
0.0984	77.96	69.2	3.748e-06	0.5336	Sema4d
0.09812	40.03	27.93	1.402e-23	0.5544	Lmbrd2
0.09807	76	64.94	1.071e-06	0.535	Stx7
0.09801	80.74	72.04	4.341e-06	0.5336	Erbin
0.09785	39.16	27.79	8.464e-22	0.5522	Lat2
0.09773	74.04	63.3	1.347e-07	0.5373	Adam17
0.09758	50.91	41.66	4.441e-09	0.5377	Kcnq1ot1
0.09751	29.55	19.67	1.547e-22	0.5469	Dapk1
0.0968	68.76	57.06	3.884e-10	0.5427	Aif1
0.09677	65.12	54.66	3.114e-08	0.538	Plekhm3
0.09659	50.59	39.92	1.811e-13	0.5456	Srpk2
0.09655	75.41	65.13	1.863e-06	0.5343	Usp8
0.09653	51.14	39.97	1.264e-13	0.5459	Eea1
0.09652	36.29	23.92	2.547e-28	0.5567	Kxd1
0.09648	44.67	33.7	3.348e-15	0.5463	Naalad2
0.0964	35.02	21.57	2.469e-34	0.5603	Rps25
0.09635	35.79	23.09	3.58e-30	0.5578	Rps26
0.09634	31.79	20.16	6.355e-29	0.5538	Gramd1b
0.09634	32.92	22.54	1.271e-22	0.5494	Ccl6
0.09614	40.71	28.87	7.376e-21	0.5517	Abcb1b
0.09611	45.36	32.04	8.814e-23	0.5559	Shisa5
0.09601	47.68	36.35	2.856e-16	0.5489	Klhl6
0.09553	37.07	24.58	5.746e-27	0.5558	Rps6
0.09552	52.91	41.2	8.308e-14	0.5466	Atxn10
0.09536	58.38	47.91	1.499e-09	0.54	Aopep
0.09528	58.2	45.4	3.363e-14	0.5484	M6pr
0.09504	47.13	35.8	1.173e-16	0.5493	Pde4dip
0.09493	36.66	25.84	6.615e-21	0.5499	Tank
0.09489	99.36	97.8	1.144e-08	0.5409	Sirpa
0.09483	83.61	75.97	0.0001175	0.5291	Ptpra
0.09425	42.94	29.3	1.704e-25	0.5576	Rpl8
0.09405	57.24	46.58	5.437e-11	0.5427	Kif13b
0.09403	100	99.91	6.503e-09	0.5415	Cmss1
0.09375	35.56	23.35	8.246e-27	0.5546	Igsf6
0.09365	36.57	23.8	2.886e-29	0.5575	Rps15a
0.09365	68.76	59.29	2.947e-07	0.536	Lrrfip1
0.09363	52.46	40.45	1.049e-14	0.5479	Zfp106
0.09363	57.65	46.97	1.041e-10	0.5423	Fgd4
0.09357	45.26	32.7	1.881e-20	0.5533	Atp6v1b2
0.09341	65.57	54.73	9.198e-09	0.5393	Ccni
0.09338	79.92	70.92	0.0001162	0.5289	Arhgap25
0.09337	57.83	46.06	4.075e-13	0.5467	Ddx39b
0.09332	16.62	6.223	4.74e-68	0.5517	Sulf2
0.09308	46.99	34.76	1.363e-18	0.5517	Ube2j1
0.09294	65.44	54.33	2.789e-09	0.5404	Ptpn6
0.09288	45.9	36.67	3.786e-12	0.5423	3110082I17Rik
0.09265	52.5	40.46	2.668e-15	0.5489	Chmp4b
0.09252	92.94	87.34	0.0006669	0.5264	Pdia3
0.09239	19.95	8.568	4.468e-61	0.5559	Anxa5
0.09217	84.02	75.91	0.0007967	0.526	Luc7l2
0.09208	53.69	41.83	1.98e-14	0.5479	Bhlhe41
0.09181	29.64	17.69	3.255e-35	0.5566	Csf2ra
0.09179	46.86	34.33	5.783e-19	0.552	Sirt2
0.09176	31.1	19.56	1.049e-29	0.5539	Hebp1
0.09164	41.85	31.29	8.622e-16	0.5461	Pkp4
0.09152	73.13	63.97	5.619e-06	0.5328	Taok3
0.09144	45.13	33.6	6.713e-18	0.5502	Serp1
0.09134	66.12	56.88	1.418e-07	0.5366	Nek6
0.091	38.25	28.9	6.093e-14	0.5422	Hpcal1
0.09085	37.7	25.5	4.643e-25	0.5545	Rps18
0.09069	69.95	58.45	2.429e-07	0.5362	Sdcbp
0.09061	77.55	67.91	4.299e-05	0.5303	Huwe1
0.09054	36.29	24.84	1.173e-23	0.5524	Tbc1d10a
0.09051	55.87	43.67	3.056e-13	0.5463	Sowahc
0.09042	17.4	8.355	4.349e-40	0.5444	Cpq
0.09025	61.98	52.31	3.078e-08	0.5377	Pign
0.09014	69.63	58.76	2.743e-07	0.5361	Eif4g1
0.08999	73.95	65.18	0.004032	0.5227	Hdac9
0.08994	63.89	56.18	3.027e-05	0.53	Bcas3
0.08942	42.85	31.64	2.327e-17	0.5485	Abhd17c
0.08937	49.77	38.1	3.437e-14	0.5463	Sqstm1
0.08936	34.61	22.73	9.293e-27	0.5541	Rpl24
0.08921	99.59	99.02	2.516e-07	0.5374	Actb
0.08911	32.83	21.73	2.024e-24	0.5507	Tnfsf13b
0.08911	86.25	78.88	0.001354	0.5251	Pros1
0.08894	48.86	37.18	1.193e-14	0.5467	Mapkapk2
0.08886	36.43	27.2	1.095e-14	0.5424	Sergef
0.08866	48.09	36.7	6.703e-15	0.547	Gapdh
0.08854	88.89	81.1	0.01206	0.5209	Fnbp1
0.08848	32.06	19.73	4.076e-32	0.5564	Eef1b2
0.08824	38.48	25.82	2.552e-25	0.555	Rpl19
0.08816	79.19	71.03	0.000828	0.5258	Tbc1d16
0.08809	38.75	26.7	3.88e-23	0.5531	Rpl7a
0.08801	32.51	23.08	8.478e-18	0.5441	Cd300lf
0.08775	76.14	66.78	1.418e-05	0.5318	Hnrnpul1
0.08768	83.83	74.7	0.0007551	0.526	Irf8
0.08762	56.28	46.28	1.483e-09	0.5397	Bod1l
0.0875	28.01	16.65	1.918e-33	0.5539	Galc
0.08737	70.26	61.64	1.579e-05	0.5313	Myo9a
0.08735	38.62	26.02	1.653e-24	0.5542	Rpl37a
0.08706	26.23	15.84	5.509e-30	0.5499	Gpr84
0.08706	38.34	26.72	5.46e-22	0.5517	Scd2
0.08668	35.06	22.96	5.049e-27	0.5545	Cox4i1
0.08653	33.42	21.62	3.035e-27	0.5536	Adam9
0.08644	65.57	55.66	1.466e-07	0.5365	Taf15
0.08637	24.86	14.05	2.613e-35	0.5518	Synj2
0.08626	32.83	21.54	1.264e-25	0.5518	Prdx1
0.08604	77.14	67.73	1.447e-05	0.5318	Pld4
0.0859	63.43	55.28	3.053e-05	0.5299	Zfp407
0.08575	36.98	26.62	1.751e-17	0.546	Gcnt2
0.08557	27.32	15.96	6.627e-34	0.5534	Rpl36a
0.08538	28.78	18.44	9.18e-26	0.549	Kcnj2
0.08538	54.37	43.9	7.484e-10	0.5399	Creb3l2
0.08535	97.91	95.67	0.002316	0.5242	Dock2
0.08519	77.87	68.86	0.0004295	0.5268	Peli1
0.08515	31.42	20.36	1.081e-26	0.5518	Itpripl2
0.08501	52.96	42.4	9.011e-11	0.5414	Vps8
0.08495	39.71	27.54	4.664e-22	0.5524	Cyp4v3
0.08475	52.69	42.55	5.919e-11	0.5418	Golgb1
0.08468	21.4	10.54	5.128e-46	0.5527	Adap1
0.08466	27.28	17.18	9.258e-26	0.5477	Lonrf3
0.08461	63.71	51.44	1.35e-09	0.5407	Sat1
0.08459	7.423	1.723	4.967e-63	0.5286	Gm15155
0.08452	68.85	58.16	1.557e-07	0.5367	Clta
0.08439	48.22	37.13	4.291e-14	0.5458	Eprs
0.08438	92.21	87.88	0.01085	0.5212	Asap1
0.08402	50.55	39.21	3.915e-13	0.5449	Arpc5
0.08395	77.73	67.8	0.0002947	0.5274	Nptn
0.08386	17.08	6.546	1.211e-65	0.5518	Cd22
0.08385	87.43	81.23	0.01977	0.5197	Btbd9
0.0838	46.22	34.48	1.35e-16	0.5487	Naca
0.08377	60.97	50.01	3.001e-09	0.5397	Ifngr2
0.08365	80.56	70.51	0.001157	0.5252	App
0.08354	87.75	81.99	0.009337	0.5215	Ppp1r9a
0.08311	82.6	74.23	0.000642	0.5263	Hnrnpu
0.08303	29.23	17.61	2.862e-32	0.5541	Rps16
0.08303	55.51	45.39	5.568e-09	0.5383	Ttc3
0.08287	73.45	64.35	0.0002075	0.5277	Fndc3b
0.08209	77	69	0.0005156	0.5265	Snd1
0.08201	53.23	43.21	8.92e-09	0.5374	Sncaip
0.08187	34.15	22.41	1.811e-25	0.5524	Rps15
0.08187	74.36	64.02	0.0001706	0.528	Vps13b
0.08185	62.8	51.82	1.285e-08	0.5386	Tcn2
0.08183	20.72	12.57	7.688e-23	0.5395	Card11
0.08176	24.27	14.98	1.457e-25	0.5449	Acaca
0.08169	80.05	71.11	0.0002621	0.5277	Tm9sf3
0.08162	57.33	46.52	1.498e-09	0.5398	Golga4
0.08157	75.73	67.01	0.0001026	0.529	Birc6
0.0814	66.94	56.35	1.021e-06	0.5343	Ewsr1
0.08129	51.09	41.78	1.346e-08	0.5367	Svil
0.08127	22.63	11.96	2.314e-39	0.5513	Tpm4
0.08108	90.16	84.27	0.002314	0.5242	Tln1
0.08095	56.97	46.1	2.466e-09	0.5392	Ylpm1
0.08084	79.23	70.89	0.002722	0.5237	Atxn7l1
0.08076	17.81	7.22	1.154e-60	0.5519	Psat1
0.08072	34.93	24.41	1.91e-19	0.5471	Naa50
0.08056	51.55	43.15	1.952e-07	0.5342	Nol4l
0.08052	29.46	18.24	4.117e-29	0.552	Nap1l1
0.0804	45.31	34.67	1.419e-13	0.5441	Nsf
0.08	65.16	55.57	1.557e-05	0.5308	Rsrc1
0.07994	58.24	48.96	1.056e-06	0.5334	Mfhas1
0.07981	35.56	24.56	4.203e-21	0.5492	Naga
0.07976	58.52	47.8	8.061e-09	0.5384	Rasal3
0.0797	20.17	9.541	2.158e-47	0.5513	Fgl2
0.07959	84.84	81.04	0.02984	0.5188	Prkn
0.07938	30.56	18.73	9.977e-31	0.554	Plekhb2
0.07931	40.21	28.4	9.032e-20	0.5501	Capns1
0.07927	70.49	60.4	9.234e-05	0.5288	Tcf20
0.07924	50.91	39.31	6.372e-13	0.5445	Rpn2
0.07922	54.55	45.39	8.243e-08	0.5356	Plxdc1
0.0792	30.51	19.42	1.797e-26	0.5507	Mllt6
0.07918	12.48	2.867	2.475e-108	0.5479	Chst2
0.07911	48.59	39.83	1.617e-07	0.5337	Sdk1
0.07908	38.62	27.9	2.604e-17	0.5465	Mink1
0.07895	56.33	46.71	7.626e-08	0.5359	Arhgef11
0.07886	25.18	16.99	2.435e-17	0.5387	Mrc2
0.0787	35.56	26.01	3.327e-15	0.5425	A330023F24Rik
0.07847	13.25	4.918	1.508e-54	0.5415	Vcam1
0.07846	83.33	74.3	0.006775	0.522	Arpc2
0.07839	28.1	18.83	3.819e-20	0.5436	Ddhd1
0.07839	95.17	91.41	0.001529	0.525	Jarid2
0.07834	29.14	22.51	1.7e-09	0.5317	Bcl2
0.07819	60.29	49.22	1.181e-08	0.5383	Slc37a2
0.07804	57.6	47.21	2.779e-08	0.5371	Trpm7
0.07798	37.75	27.05	4.493e-18	0.547	Gabarap
0.07779	34.34	23.2	2.543e-22	0.5496	Rps2
0.07769	42.62	31.22	4.984e-16	0.5464	Rasgef1b
0.07763	57.19	45.78	5.999e-10	0.5405	Arl4c
0.07759	58.01	47.8	3.302e-08	0.537	Gak
0.07743	25.27	14.63	3.033e-32	0.5502	Rps28
0.07741	43.9	33.57	1.872e-13	0.5434	Slc11a1
0.07712	67.71	57.7	1.444e-05	0.5311	Calm1
0.077	56.01	45.82	3.664e-08	0.5365	Cabin1
0.07698	33.65	23.4	1.363e-19	0.5466	Renbp
0.07697	44.9	34.68	8.612e-13	0.5427	Pdpk1
0.07696	19.67	10.37	2.367e-35	0.5456	Or5v1b
0.07693	73.04	65.24	0.0005341	0.5263	Rbm47
0.0766	34.7	22.77	4.037e-25	0.5524	Rpl9
0.07652	36.93	26.32	1.223e-18	0.5473	Pgd
0.07646	28.28	17.38	2.941e-28	0.5503	Gba
0.07642	73.5	64.15	0.0003666	0.5268	Elk3
0.07631	72.04	63.65	0.0004376	0.5265	Rhoq
0.07626	58.2	47.77	1.635e-08	0.5377	Septin2 - ENSMUSG00000026276
0.07621	39.21	29.6	1.91e-14	0.5433	Uhrf1bp1
0.07618	91.53	84.52	0.06889	0.5168	Lcp1
0.07598	42.76	32.14	2.255e-14	0.5443	Ifnar1
0.07594	97.18	93.17	0.07814	0.5165	Cfh
0.07591	47.68	37.95	1.202e-10	0.5399	Apobec3
0.07588	76.96	69.23	0.005252	0.5224	Tmem164
0.07569	32.88	21.95	1.933e-22	0.5488	Eef1g
0.07566	67.94	57.27	7.537e-06	0.532	Clip1
0.07559	59.2	47.94	5.879e-09	0.5387	Hipk1
0.07536	70.4	60.53	7.514e-05	0.5291	Senp2
0.07535	90.3	86.07	0.01401	0.5206	Arhgap22
0.07529	26.14	15.24	7.553e-31	0.5499	Sp100
0.07528	48.63	37.5	1.35e-12	0.5434	Hadha
0.07492	64.8	55.29	1.427e-05	0.5309	Susd6
0.07489	87.61	82.14	0.03907	0.5182	Zfand3
0.07486	35.38	24.95	7.341e-19	0.5467	Colgalt1
0.07477	81.1	72.29	0.007259	0.5218	Ptp4a2
0.07457	50.73	40.12	8.171e-11	0.5409	Eif5b
0.07438	37.48	26.54	1.502e-18	0.5474	Cdc37
0.07433	55.92	45.51	2.87e-08	0.5367	Dram2
0.07428	30.15	20.2	2.527e-21	0.5461	Ifi30
0.07419	40.21	30.5	9.768e-13	0.541	Galk2
0.07414	24.86	15.45	5.822e-25	0.545	Tpi1
0.07406	74.59	65.67	0.0006259	0.526	Daglb
0.07404	74.27	64.2	0.0002975	0.5272	Ehd4
0.07388	33.29	23	1.296e-19	0.5463	Rtcb
0.07387	45.17	35.41	9.871e-11	0.5393	Tmem87b
0.07369	46.08	35.46	7.779e-13	0.5431	Hnrnpa1
0.07363	79.28	70.92	0.008656	0.5214	Fcho2
0.07362	45.86	36.26	2.97e-10	0.5387	Rab27a
0.07355	19.35	9.864	5.828e-38	0.5464	Speg
0.07344	76.18	68.13	0.0005964	0.5262	ENSMUSG00000095041
0.07341	52.78	42.5	2.905e-09	0.5383	Tcirg1
0.0734	35.11	25.77	5.698e-14	0.5406	C5ar1
0.07329	90.35	82.48	0.04817	0.5177	Gnai2
0.07318	54.87	44.04	3.868e-09	0.5384	Wbp1l
0.07318	53.55	43.72	6.631e-08	0.5355	Lpgat1
0.07314	19.49	10.78	2.724e-29	0.5421	Plekhh2
0.073	68.17	60.54	0.0004087	0.5264	Fkbp5
0.07292	53.1	43.6	4.592e-08	0.5359	Trrap
0.0729	51.91	41.33	9.091e-11	0.5411	Sf3b2
0.07271	50.09	39.12	7.162e-12	0.5426	Selenof
0.07267	39.12	28.92	5.948e-15	0.5437	Tep1
0.07261	43.85	33.2	1.189e-13	0.5436	Tmem86a
0.07237	24.59	14.69	4.973e-28	0.5468	Tlr1
0.07219	42.12	31.51	2.632e-14	0.5439	Rnaset2a
0.07218	70.54	61.03	6.821e-05	0.5292	Kmt2d
0.07217	80.78	74.65	0.01028	0.5211	Ifitm10
0.07215	70.67	61.32	0.000538	0.5261	Dnajc13
0.07194	35.02	25.71	7.065e-14	0.5404	Slc9a7
0.07178	78.01	69.55	0.009554	0.5212	Tnfrsf21
0.07173	63.43	54.3	5.192e-06	0.5321	Lmo2
0.07168	57.74	48.05	1.756e-07	0.5352	Kif1b
0.07157	65.85	56.27	4.335e-05	0.5295	Hps4
0.07152	33.42	23.53	9.391e-18	0.5444	Amz1
0.0714	55.65	43.8	8.059e-10	0.5398	Eif3c
0.07138	59.34	49.05	3.693e-07	0.5346	Tcf25
0.07135	17.71	8.801	1.685e-36	0.5433	Nlrc5
0.07112	24.5	15.36	1.664e-23	0.5435	Gm11613
0.07112	83.65	77.95	0.04057	0.5181	Fam172a
0.07108	31.19	20.91	8.446e-21	0.5461	Rpl34
0.07106	18.31	10.01	8.972e-29	0.5404	Cd244a
0.07106	34.61	23.26	1.475e-21	0.5488	Sh3bgrl3
0.07105	43.44	32.63	5.23e-14	0.544	Cndp2
0.07096	91.99	87.79	0.0495	0.5176	Fgfr2
0.07092	82.56	75.49	0.006101	0.5222	Ncf1
0.07084	55.74	45.03	3.553e-08	0.5364	Slc3a2
0.07081	96.99	95.81	0.007251	0.5221	Plcl1
0.07076	40.8	30.3	7.179e-15	0.5443	Rragc
0.07071	75.09	66.13	0.001701	0.5243	Hk2
0.07043	27.6	17	5.96e-27	0.5486	Rpl28
0.0704	36.79	26.33	4.499e-17	0.5453	Gmfb
0.0704	62.11	52.78	1.3e-06	0.5336	Ttyh3
0.07035	70.77	63.34	0.001843	0.5241	Gm5086
0.07023	20.63	12.04	5.461e-26	0.5415	Prr5l
0.07013	55.24	45.63	2.379e-07	0.5345	Tlk1
0.0701	62.02	52.03	1.025e-05	0.531	Trim44
0.07003	58.93	47.79	1.017e-07	0.5358	Lacc1
0.07002	40.8	31.26	5.791e-12	0.54	Supt16
0.06995	56.19	45.58	2.005e-08	0.5371	Prpf8
0.06989	53.01	42.22	1.119e-09	0.5391	Atp5b
0.06982	31.83	21.69	1.017e-19	0.5455	Rps13
0.06981	29.51	19.21	8.18e-23	0.5468	Rps20
0.06965	81.83	74.86	0.01018	0.5212	Pou2f2
0.06935	35.97	26.45	2.53e-14	0.5415	Tbc1d1
0.06924	67.12	57.88	9.071e-05	0.5286	Arhgap30
0.06917	87.84	81.84	0.07768	0.5165	Chd7
0.06909	37.98	28.04	1.304e-14	0.5428	Hsd17b12
0.06909	50.05	39.28	1.761e-10	0.54	Cpne3
0.06907	25.77	15.97	8.157e-25	0.5455	Rpl10a
0.06897	14.71	6.423	3.199e-42	0.5408	Plaur
0.06897	36.02	27.08	2.547e-12	0.5387	Liph
0.06885	56.83	47.73	9.066e-06	0.5306	Bltp1
0.06869	81.38	73.02	0.01206	0.5208	Sf3b1
0.06854	59.52	48.13	2.118e-08	0.5375	Coro1a
0.06832	53.64	43.82	1.319e-07	0.5348	Sbno1
0.06831	43.67	33.2	1.516e-12	0.5418	Parp1
0.06827	30.97	24.06	6.394e-09	0.5314	Rad51b
0.06826	82.06	74.2	0.03338	0.5185	Fus
0.06811	30.78	20.35	2.482e-21	0.5462	Rps21
0.06807	38.62	27.65	2.3e-16	0.5451	Rps27
0.06806	78.28	69.71	0.008743	0.5214	Rac1
0.06794	29.33	20.54	2.325e-16	0.5405	Agtpbp1
0.06789	33.79	24.49	3.346e-15	0.5416	ENSMUSG00000121485
0.06777	51.68	41.95	3.283e-08	0.5359	Ogdh
0.06775	22.54	14	2.121e-22	0.5409	Mapkapk3
0.06772	39.85	30.39	5.354e-12	0.5397	Arhgef7
0.06769	26.68	17.51	1.74e-20	0.5427	Snx8
0.06764	92.9	88.46	0.1136	0.5155	Ski
0.06761	29.87	19.42	2.354e-22	0.5465	Clcn7
0.06752	38.3	28.89	1.37e-12	0.54	Akap11
0.06751	61.79	53.35	7.21e-05	0.5285	Tgfa
0.0674	34.52	24.61	1.25e-16	0.5436	Rpl31
0.06733	56.92	48.03	9.971e-06	0.5305	2510009E07Rik
0.06729	32.01	21.81	7.118e-19	0.5446	Idua
0.06719	36.7	26.36	5.019e-16	0.5439	Arl8a
0.06717	63.34	52.62	5.693e-06	0.5318	Ywhab
0.06712	40.21	31.17	7.229e-11	0.538	Slx4ip
0.06706	58.88	49.4	2.625e-06	0.5324	Srcap
0.06699	37.43	28.21	3.412e-12	0.5391	Man2a1
0.06672	47.31	38.09	2.909e-08	0.5351	Cyth3
0.06666	83.11	76.2	0.1054	0.5156	Lncpint
0.06663	41.62	31.94	4.666e-11	0.5387	Pkd2
0.06658	21.27	12.06	4.038e-29	0.544	Got1
0.06652	57.38	48.85	6.835e-06	0.5311	Slf2
0.06646	61.79	52.25	4.655e-05	0.529	Aak1
0.06642	99	97.87	0.002132	0.5244	Laptm5
0.06641	55.92	44.89	3.115e-08	0.5365	Cic
0.06641	83.47	74.29	0.1347	0.5149	Lnpep
0.0664	61.61	52.15	1.262e-05	0.5308	Arl8b
0.06622	37.84	27.64	1.051e-14	0.5427	Rnf20
0.06621	32.7	22.45	4.343e-19	0.5453	Grina
0.06617	96.31	92.04	0.2926	0.5125	Wnk1
0.06616	36.61	28.01	6.557e-12	0.5385	Uhmk1
0.06613	66.12	57.32	0.001097	0.5246	Itpkb
0.06585	65.62	55.94	0.000104	0.5282	Reep3
0.06583	18.81	9.765	1.473e-33	0.5433	Susd1
0.0657	31.06	21.29	2.246e-18	0.5436	Washc5
0.0656	41.53	31.66	4.28e-12	0.5404	Oip5os1
0.06544	60.43	51.5	1.414e-05	0.5305	Map3k1
0.0654	57.6	46.88	6.574e-08	0.5361	Trim30a
0.06537	44.95	35.25	4.008e-10	0.5381	Otulin
0.0653	38.98	29.43	9.625e-12	0.5389	Spidr
0.06527	29.74	20.55	1.081e-16	0.5409	ENSMUSG00000120992
0.0652	24.18	14.84	7.749e-24	0.5432	Rpph1
0.06517	95.45	91.59	0.1747	0.5142	Fyb
0.06515	32.65	23.39	2.842e-15	0.541	Dusp3
0.06512	12.16	6.575	4.852e-20	0.5279	Pacrg
0.06496	18.21	11.45	6.113e-17	0.5325	Atrnl1
0.06494	54.42	45.23	5.148e-07	0.5336	Cntrl
0.06487	25.23	16.04	4.663e-22	0.5428	Gpr137b
0.06487	37.57	29.49	5.629e-10	0.5357	Mdn1
0.06481	42.85	34.46	8.232e-09	0.5352	Grk3
0.0648	40.57	30.48	4.539e-13	0.5415	Naip5
0.06479	60.66	53.29	0.0002976	0.5264	Lcorl
0.06465	39.53	30.03	4.235e-12	0.5397	Eif5a
0.06459	36.79	28.21	5.38e-11	0.537	Ap1s2
0.06456	46.04	36.16	3.994e-10	0.5384	Cebpa
0.06451	69.99	62.31	0.009562	0.5209	Fars2
0.06442	48	38.06	1.966e-09	0.5376	Clip2
0.06441	66.85	57.84	0.0007563	0.5253	Nfe2l2
0.06438	46.22	37.39	2.028e-07	0.5329	Ipcef1
0.06436	43.53	33.69	5.68e-11	0.5392	Smarca5
0.06433	80.37	73.97	0.06306	0.5169	Stag1
0.06416	42.26	32.32	5.18e-12	0.5405	Slc25a5
0.06401	39.12	30.34	1.116e-10	0.5374	Rasa4
0.06384	59.11	49.17	1.17e-05	0.5305	Prcp
0.06377	54.92	45.45	1.522e-06	0.5324	Cept1
0.06376	34.2	25.54	7.848e-13	0.5387	Lrpap1
0.0637	26.46	16.42	1.113e-24	0.5458	Eif3f
0.0636	55.01	46.13	2.941e-06	0.5318	Pik3cb
0.06345	45.31	35.76	2.509e-09	0.5367	Ctnna1
0.06345	49.27	40.17	3.488e-08	0.5354	Stx16
0.06337	57.56	48.5	1.087e-05	0.5305	Prr14l
0.06335	51.59	41.82	1.009e-07	0.5347	Wdr7
0.06331	40.12	31.24	5.56e-10	0.5364	Osbpl1a
0.0633	9.699	4.866	1.362e-19	0.5241	Esrrg
0.06325	21.68	14.18	2.268e-17	0.536	Ccl9
0.06293	42.08	33.06	4.671e-10	0.5372	Sh3bp2
0.0629	72.77	65.29	0.008824	0.5212	Irak2
0.06278	65.48	56.13	0.0001926	0.5273	Pfn1
0.06271	43.62	34.13	2.841e-10	0.538	Arf3
0.06269	30.33	23.61	1.181e-08	0.5307	Zfp704
0.06268	51.05	42.03	1.77e-07	0.5341	Cd300a
0.06266	35.2	25.09	3.348e-15	0.542	Plekho2
0.06266	45.81	37.07	1.052e-07	0.5335	Slc10a7
0.06265	86.48	79.21	0.09648	0.5159	Hsp90ab1
0.06256	29.83	19.44	1.475e-21	0.5457	H2-T23
0.06256	47.13	39.4	1.603e-06	0.5312	Il1rl2
0.06254	27.82	18.98	2.291e-17	0.5405	Zmiz2
0.06248	74.54	65.98	0.009019	0.5212	Gcnt1
0.06247	35.02	25.87	1.48e-13	0.54	Fuca2
0.06241	74.64	66.27	0.002797	0.5234	Prkcd
0.06238	15.44	7.367	2.296e-35	0.5394	Cd274
0.06237	11.25	4.215	1.822e-44	0.5348	Mdfic
0.06237	94.26	90.26	0.2376	0.5133	Zmiz1
0.06236	47.45	38.33	4.661e-08	0.5347	Inpp4a
0.06235	8.607	3.28	2.033e-33	0.5267	Etl4
0.06233	41.62	32.2	9.932e-11	0.5382	Ehbp1l1
0.0622	69.17	60.03	0.004226	0.5224	Tnfrsf11a
0.06218	35.47	24.88	4.786e-17	0.5444	Fuca1
0.06209	20.04	12.34	1.627e-20	0.5371	2900089D17Rik
0.06206	27.96	19.1	4.814e-17	0.5402	Ldha
0.062	62.43	53.4	0.0003877	0.526	Map2k5
0.06183	30.1	20.42	2.366e-18	0.5429	Mospd2
0.06181	15.35	6.926	1.303e-40	0.5413	Dpp7
0.06171	39.16	30.34	8.13e-10	0.5358	Ccdc88a
0.0617	59.06	50.16	3.837e-05	0.529	Dhx9
0.06167	11.79	4.614	4.148e-43	0.5356	Rell1
0.06164	77.23	70.74	0.09496	0.5158	Vti1a
0.06161	54.14	44.86	2.356e-06	0.5318	Prpf40a
0.06151	26.68	19.27	6.487e-12	0.5336	Hivep2
0.06151	83.65	75.63	0.04948	0.5175	Tmbim6
0.06147	57.29	48.5	1.074e-05	0.5305	Pmp22
0.06128	21.63	13.32	4.738e-22	0.5397	Pyroxd2
0.06123	58.93	49.13	1.26e-05	0.5304	Hectd1
0.06123	72.27	63.67	0.02194	0.5191	Cdkal1
0.06122	56.15	46.03	1.041e-06	0.533	Tapbp
0.06119	45.58	35.73	7.813e-10	0.5377	Il10rb
0.06112	73.32	64.58	0.02136	0.5192	Mtmr3
0.0611	77.64	69.56	0.02739	0.5188	Skil
0.06109	34.79	25.63	2.02e-13	0.5397	Furin
0.06102	24.36	15.21	1.536e-22	0.5424	Sri
0.06101	23.68	15.18	6.601e-20	0.5398	Rpl38
0.06101	34.93	26.21	2.528e-11	0.5367	Coro2a
0.06095	95.99	93.11	0.07312	0.5167	Mir6236
0.06092	33.15	22.8	5.457e-18	0.5442	Ergic3
0.06077	62.34	52.24	3.099e-05	0.5296	Ubap2l
0.06072	52.19	43.93	1.854e-05	0.5291	Zfp609
0.06064	23.45	14.55	5.261e-22	0.5412	Eif2s3y
0.0606	9.699	2.563	6.046e-69	0.5356	Atp1a3
0.06056	36.43	28.24	2.462e-09	0.5341	Slc39a11
0.06052	63.43	54.45	0.0002002	0.5271	Glg1
0.06045	26.41	17.19	3.687e-20	0.5421	Cox7a2l
0.06044	36.93	27.07	1.42e-13	0.5407	Dctn1
0.06042	15.76	9.366	3.166e-18	0.531	Clybl
0.06038	72.4	64.38	0.0051	0.5223	Spata13
0.06037	67.76	59.8	0.001428	0.5243	Caprin1
0.06026	33.65	24.59	1.317e-13	0.5394	mt-Nd2
0.06024	62.84	54.59	0.000706	0.5251	Mrtfa
0.06013	33.38	24.98	1.223e-11	0.5366	Metap1d
0.06012	34.24	24.61	5.324e-15	0.5414	Bag1
0.06011	54.78	45.14	2.999e-06	0.5316	Eps15
0.0601	41.03	32.16	1.908e-09	0.5357	Klf13
0.0601	91.53	87.2	0.06762	0.5169	Son
0.06004	54.33	45.02	5.543e-06	0.5308	Dnajc5
0.06003	24.64	16.04	5.195e-19	0.5397	Nab1
0.06003	32.06	22.03	1.727e-17	0.543	Atp6v0e
0.06	25.91	16.68	1.493e-20	0.542	Glmp
0.05985	47.63	39.11	2.401e-07	0.5332	Sbno2
0.05972	40.44	32.19	2.563e-08	0.5335	Slc9a1
0.05966	15.98	8.896	1.044e-23	0.5347	Gm37168
0.05966	46.99	37.88	6.633e-08	0.5342	Lpcat1
0.05966	62.48	53.28	0.0001426	0.5275	Srsf5
0.05965	39.44	30.04	4.138e-11	0.538	Snrnp200
0.05959	55.28	46.56	7.605e-06	0.5307	Ubr2
0.0595	52.05	43.18	1.788e-06	0.5318	Plcb2
0.05943	43.49	33.71	2.91e-10	0.5379	Ncstn
0.05941	36.79	26.92	1.512e-13	0.5406	Szrd1
0.0593	22.68	14.49	2.782e-19	0.5384	Smim3
0.05927	17.21	8.986	2.591e-30	0.5397	Kcnj10
0.05926	53.92	44.23	3.334e-06	0.5313	Mib1
0.05924	51	43.37	5.324e-05	0.5277	Gse1
0.05921	49	38.66	4.144e-09	0.5371	Atp5a1
0.0592	58.11	48.36	4.581e-05	0.5286	Ago3
0.05912	79.23	72.53	0.02279	0.5193	Ddx17
0.05908	41.58	32.61	3.727e-09	0.5353	Pikfyve
0.05894	70.81	63.1	0.005392	0.5221	Aim2
0.05885	54.14	44.17	5.844e-07	0.5333	Vps35
0.05883	59.61	50.82	7.502e-05	0.5282	Pdcd6ip
0.05879	25.05	15.99	1.682e-20	0.5412	Rpl35
0.05875	72.4	64	0.006807	0.5217	Snrnp70
0.0587	39.44	30.78	9.1e-10	0.5359	Specc1l
0.05865	68.26	59.84	0.004737	0.5222	Cnot4
0.0586	31.15	21.54	8.738e-17	0.5418	Psme1
0.05856	29.83	20.55	1.561e-16	0.5407	Rps17
0.05853	42.76	34.2	2.057e-08	0.5343	Camsap2
0.05849	66.89	57.79	0.001499	0.5241	Rock1
0.05847	49.45	39.52	6.158e-08	0.5347	Hsd17b4
0.05845	66.39	56.44	0.0002519	0.5269	Pitpna
0.05841	25.73	16.29	2.997e-22	0.5433	Plbd2
0.0584	32.6	25.03	9.231e-10	0.5334	4930517O19Rik
0.05835	98.09	96.15	0.07672	0.5165	Itgb5
0.05835	63.3	54.67	0.0008237	0.5249	Setd3
0.05822	44.26	35.09	1.554e-08	0.5348	Tmem65
0.05808	39.16	30.56	7.068e-10	0.536	Ube2l3
0.05806	99.73	99.56	0.003728	0.5233	Gphn
0.05798	33.88	25.22	4.487e-12	0.5374	Flcn
0.05789	35.43	26.36	5.214e-12	0.5379	Arfgef2
0.05786	44.4	34.52	7.472e-10	0.5374	Dazap2
0.05778	38.52	29.64	4.396e-10	0.536	Wdfy1
0.05764	66.03	57.1	0.0006641	0.5254	Kpna1
0.05756	36.16	27.66	1.327e-10	0.5361	Mapk3
0.05745	25.05	16.32	8.747e-19	0.5398	Slamf6
0.05742	57.19	47.41	7.345e-06	0.5308	Copa
0.0574	81.15	74.02	0.06816	0.5167	Prrc2c
0.05737	16.17	8.663	1.141e-26	0.5365	St14
0.05729	41.99	32.07	8.43e-11	0.5383	Clec5a
0.05725	27	18.99	4.625e-14	0.5364	Diaph1
0.05717	54.46	44.98	2.91e-06	0.5316	Pacs2
0.05714	62.89	54.47	0.000654	0.5252	Zmynd8
0.05693	95.13	92.81	0.3969	0.5115	Runx1
0.05693	59.93	51.54	0.0002622	0.5264	Ankhd1
0.05693	70.86	62.33	0.009494	0.5209	Usp9x
0.05686	7.878	2.203	1.75e-51	0.5284	H2-Ab1
0.05682	26.5	17.53	1.693e-18	0.5406	Eef1d
0.05677	9.654	2.673	3.04e-64	0.5348	Dna2
0.05675	30.19	20.79	5.381e-17	0.5415	Atp6v1g1
0.05671	25.68	17.09	9.587e-18	0.5393	Rpl18
0.0567	78.32	70.73	0.07614	0.5164	Notch2
0.05639	19.03	10.86	9.029e-25	0.5387	Hacd4
0.05639	33.74	24.82	1.125e-12	0.5381	Gvin-ps7
0.05637	12.02	5.046	6.847e-38	0.5346	Arhgap19
0.05634	41.39	32.91	2.834e-08	0.5336	Lars
0.05622	36.79	27.99	6.367e-11	0.5368	Rrp1
0.05622	56.1	46.91	1.499e-05	0.5299	Nudcd3
0.05621	17.94	10.4	5.25e-23	0.5366	AI506816
0.05616	38.71	29.18	1.385e-11	0.5385	Coro1b
0.05613	63.75	54.01	0.0002771	0.5266	Tmed7
0.0561	15.48	8.231	2.485e-26	0.5355	Mt1
0.05604	18.62	10.6	5.535e-25	0.5385	Chst1
0.05601	55.65	46.83	3.583e-05	0.5287	Dym
0.05599	60.75	51.13	0.000129	0.5275	Serbp1
0.05588	67.17	57.52	0.003841	0.5224	Ankfy1
0.05568	34.02	24.99	4.331e-13	0.5389	Ddost
0.05554	29.33	19.92	4.268e-17	0.541	Tor3a
0.05554	56.83	47.45	2.045e-05	0.5296	Hspa4
0.05534	9.335	2.81	1.849e-54	0.5325	Gm49339
0.05532	53.83	44.22	1.566e-06	0.5322	Sun2
0.05527	49.09	39.85	3.112e-07	0.5331	Klhl24
0.05527	76.78	68.79	0.07678	0.5163	Trip12
0.05519	85.97	79.36	0.6408	0.5096	Rab8b
0.05516	39.39	29.87	2.995e-11	0.5382	Surf4
0.05512	99.41	98.39	0.06338	0.517	Macf1
0.05509	43.4	35.28	5.986e-07	0.5313	Aatf
0.05509	68.08	58.51	0.002719	0.5231	Camk1
0.05505	15.3	9.076	5.686e-18	0.5304	Ccl4
0.05504	42.26	33.81	9.102e-08	0.5328	Banp
0.05502	61.7	53.45	0.001796	0.5235	Pcmtd1
0.05496	7.923	4.215	1.247e-13	0.5186	Cacnb4
0.05491	44.35	35.51	1.253e-07	0.5329	Npepps
0.05487	60.56	52.44	0.0005344	0.5254	Thrap3
0.05485	55.78	46.47	3.247e-05	0.5288	Smarcc2
0.05479	62.16	53.34	0.001712	0.5236	Kdm2a
0.05476	45.22	36.67	5.213e-07	0.5318	Cacul1
0.05474	9.517	3.176	1.248e-46	0.5315	Gm26714
0.05471	53.01	43.81	4.874e-06	0.5308	Prpf4b
0.05467	24.45	16.19	1.227e-17	0.5384	Ssr4
0.05465	43.35	35.82	8.756e-06	0.5285	Fggy
0.05463	50.32	40.58	7.83e-07	0.5323	Vps35l
0.05461	58.97	49.66	0.0001037	0.5276	Matr3
0.0546	22.95	15.45	2.948e-15	0.5349	Foxn2
0.05455	30.1	21.45	1.815e-13	0.5373	Birc3
0.05454	29.51	21.38	1.077e-12	0.5361	Hps5
0.05452	66.94	57.88	0.002118	0.5235	Actr3
0.05448	27.82	18.65	5.423e-17	0.5398	Ddx3y
0.05448	40.03	32.34	3.581e-07	0.531	Ctif
0.05447	36.61	27.45	2.021e-11	0.5374	Lap3
0.0544	88.21	81.72	0.8609	0.5081	Specc1
0.05435	23.27	14.61	1.85e-20	0.5397	Atox1
0.05432	48	39.02	6.982e-07	0.532	Htt
0.05428	11.16	4.381	3.857e-40	0.5336	F630206G17Rik
0.05427	53.92	44.39	6.894e-06	0.5305	Fam168b
0.05426	33.93	25.27	1.773e-11	0.5365	Igsf8
0.05424	67.81	58.26	0.002575	0.5232	Arl6ip1
0.05415	27.09	18.25	7.716e-17	0.5393	Anp32b
0.05414	60.84	51.53	0.0004627	0.5255	Spop
0.05407	32.33	23.26	8.833e-14	0.5389	D130009I18Rik
0.054	52.23	43.28	7.756e-06	0.5301	Srek1
0.05389	48.36	40.53	8.173e-06	0.5295	Camsap1
0.0538	29.42	21.39	7.21e-12	0.5349	Rbms1
0.05379	55.56	46.76	6.704e-05	0.5278	Btk
0.05379	60.93	52.21	0.0004457	0.5257	Ogt
0.05376	17.12	10.17	9.125e-20	0.5335	Cd101
0.05376	36.34	28.17	1.285e-08	0.5326	Prkag2
0.05367	36.98	27.89	7.229e-11	0.5367	Sptan1
0.05361	22.59	14.34	2.324e-19	0.5383	Gnpda1
0.0536	13.66	7.277	5.795e-23	0.5313	Ppargc1b
0.05359	12.75	8.25	5.853e-11	0.5225	Trps1
0.05351	56.28	47.14	5.844e-05	0.5281	Ap2b1
0.0535	39.21	30.78	4.377e-09	0.5345	Acsl5
0.05349	41.99	33.28	1.228e-08	0.5345	Nudt3
0.05324	48.54	38.95	1.661e-07	0.5335	Opa1
0.05322	7.423	1.87	2.775e-56	0.5278	A430093F15Rik
0.05317	28.14	21.52	1.713e-08	0.5294	Zhx2
0.05316	54.92	45.49	9.18e-06	0.5303	Fam120a
0.05311	82.65	76.36	0.3699	0.5117	Blnk
0.05302	35.06	26.27	3.153e-11	0.5366	Tmem50b
0.05298	25.68	16.81	1.701e-18	0.5399	Rps10
0.05296	39.21	30.49	9.648e-09	0.5338	Naip6
0.0529	24.32	16.21	2.438e-16	0.5369	Dap
0.05279	81.19	74.67	0.1752	0.5141	Ptbp3
0.05275	33.2	24.3	2.21e-12	0.5374	Gcc2
0.05274	46.4	36.55	3.304e-08	0.5345	Rnpep
0.05271	26.82	17.91	3.545e-17	0.5394	Calm3
0.05263	86.38	80.36	0.6976	0.5092	Nek7
0.05259	66.62	57.56	0.001669	0.5239	Mob1a
0.05255	33.06	26.12	5.094e-08	0.5306	Slc38a6
0.05252	38.25	28.91	5.774e-11	0.5373	Taf1d
0.05247	87.07	80.2	0.6676	0.5094	Adam10
0.05246	66.99	59.16	0.007481	0.5213	Mdm4
0.05244	18.76	12.64	7.193e-13	0.5295	Osbpl3
0.05232	44.95	35.02	7.356e-09	0.5355	Ppig
0.05231	46.9	37.56	1.719e-07	0.5332	Gm44860
0.05224	65.85	55.86	0.002053	0.5234	Cd37
0.05223	8.47	2.312	4.267e-57	0.5307	Lilrb4a
0.05215	37.02	28.35	1.045e-09	0.5348	Aebp2
0.0521	58.42	50	0.000354	0.5258	Ubr4
0.05208	37.61	28.43	1.749e-10	0.5363	Tm9sf4
0.052	51.32	42.39	8.974e-06	0.5298	Smarca4
0.05198	22.18	15.29	2.416e-13	0.5325	Zfp395
0.05193	46.27	37.04	2.802e-07	0.5325	Ago2
0.05187	37.02	28.95	2.512e-08	0.5324	Cdk17
0.05183	22.77	14.92	5.32e-17	0.5364	Nop53
0.05182	35.38	26.1	8.158e-12	0.5375	Gfpt1
0.05181	35.43	27.45	2.922e-09	0.5336	Med14
0.05176	39.39	30.52	3.476e-09	0.5347	Cyb561a3
0.05174	77.55	69.2	0.2478	0.513	Itsn2
0.05172	39.39	32.05	1.583e-06	0.5294	Nr6a1
0.05171	81.51	73.78	0.4781	0.5107	Grb2
0.0517	20.36	11.92	1.736e-23	0.5392	S1pr1
0.05168	13.39	6.878	4.162e-25	0.532	Bcl2a1a
0.05168	75.87	69.11	0.1696	0.5141	Tcf12
0.05163	88.62	82.94	1	0.5072	Plcg2
0.05161	44.63	35.99	4.396e-07	0.5318	Phka2
0.05149	16.53	9.247	3.262e-23	0.535	Bst2
0.05149	28.28	19.69	7.549e-15	0.538	Tmem123
0.05147	31.65	24.34	4.461e-09	0.5319	Mras
0.05143	59.29	51.07	0.0008378	0.5245	Cnot6l
0.05141	29.6	20.56	4.364e-15	0.5389	Rpl35a
0.05141	53.23	43.01	4.478e-06	0.5308	Sec31a
0.05139	38.75	29.75	6.876e-10	0.5357	Smim14
0.05136	56.47	48.76	0.0006279	0.5248	Kansl1l
0.05126	39.98	31.84	8.17e-08	0.5323	Vac14
0.05125	35.47	27.7	3.519e-08	0.5316	Sil1
0.05116	66.94	58.07	0.006357	0.5215	Hnrnpm
0.05115	39.89	30.51	4.572e-10	0.5363	Rnf149
0.05115	59.11	49.93	0.0002465	0.5263	Tet2
0.05114	10.02	3.048	2.32e-57	0.5347	Gpr162
0.05114	53.01	43.75	1.603e-05	0.5293	Uggt1
0.0511	6.694	0.75	7.375e-117	0.5297	Lox
0.05103	76.87	68.42	0.07303	0.5164	Itgb1
0.05102	27.5	19.03	6.66e-15	0.5375	Fam3c
0.05102	30.51	22.15	1.047e-12	0.5366	Taf1
0.05085	75.55	67.62	0.062	0.5168	Sppl2a
0.05075	67.08	58.52	0.009631	0.5207	Rab2a
0.0507	36.38	27.77	1.378e-09	0.5343	Baz2a
0.05065	68.49	60	0.009991	0.5207	Acin1
0.05055	15.8	8.388	1.959e-26	0.5358	H2-M3
0.05038	30.15	21.66	5.366e-13	0.5368	Socs6
0.05038	42.21	32.75	1.243e-09	0.5363	Parp14
0.05026	42.49	34.28	6.359e-07	0.531	Wwp2
0.05024	43.72	35.48	6.359e-07	0.5313	Evi2a
0.05024	57.19	48.33	0.0003689	0.5256	Hnrnpa3
0.05023	23.54	16.39	2.535e-13	0.5334	Pdcd11
0.05023	38.66	29.74	1.321e-09	0.5352	Bcap31
0.0502	76.5	70.3	0.1706	0.5141	Ankrd17
0.05019	74	65.81	0.06985	0.5165	Atp6v0a1
0.05015	26.55	18.66	1.578e-13	0.5354	Slc17a5
0.05013	55.69	46.81	0.000138	0.5268	Nrd1
0.05007	25.55	19.04	1.831e-09	0.5297	Afg1l
0.05004	37.75	29.48	1.285e-08	0.5331	Nacc2
0.05003	39.75	31.55	6.323e-08	0.5324	Slc38a2
0.05003	54.6	46.92	0.0004266	0.5251	Dis3l2
0.05002	53.46	44.99	9.985e-05	0.5271	Pik3ca
0.04999	62.57	54.08	0.002171	0.5232	Gapvd1
0.0499	77.91	70.24	0.2164	0.5134	Cerk
0.04982	12.93	6.57	7.515e-25	0.5312	Gm15964
0.04973	9.882	3.304	7.791e-48	0.5326	ENSMUSG00000120355
0.04973	39.25	30.33	1.895e-09	0.5351	Bnip2
0.04968	45.86	37.55	1.506e-06	0.5309	Vdac2
0.04964	23.77	15.95	1.635e-15	0.5357	Pcyt1a
0.04964	41.07	32.12	1.321e-08	0.5341	Efcab14
0.04962	34.93	26.53	3.831e-10	0.5348	Zswim8
0.04962	51.59	43.46	8.754e-05	0.527	Gm21992
0.04961	55.83	46.79	6.308e-05	0.5279	Cebpg
0.0496	44.35	36.46	1.165e-05	0.5283	Arsg
0.04956	12.61	5.962	2.759e-29	0.5326	Sdc4
0.04951	43.9	35.76	1.957e-06	0.5301	Zfp277
0.04949	53.01	43.82	1.152e-05	0.5297	Eif1
0.04943	42.67	34.3	3.054e-07	0.5317	Rc3h2
0.04938	11.75	5.217	4.085e-32	0.5322	Ttyh2
0.04938	19.44	12.17	4.647e-18	0.5345	Echs1
0.04938	57.42	48.99	0.0004999	0.5252	Ep400
0.04937	21.36	13.98	6.119e-16	0.5343	Rpl39
0.04929	52.87	44.5	0.0001126	0.5268	Atp7a
0.0492	45.67	38.66	6.926e-05	0.5265	Ncoa1
0.04918	11.52	5.492	2.327e-26	0.5297	Sh3bgrl
0.04916	25.27	18.05	1.028e-11	0.5325	Nln
0.04914	20.77	13.3	3.586e-17	0.5349	Siae
0.0491	43.85	35.28	7.711e-07	0.531	Otud7b
0.04905	36.79	27.98	4.738e-10	0.5353	Anapc5
0.04905	88.89	84.93	0.8294	0.5083	Ttc28
0.04888	49.64	41.45	3.038e-05	0.5281	Crebrf
0.04885	62.43	53.54	0.002789	0.5227	Herc4
0.04883	58.47	49.92	0.0005236	0.5252	Hnrnpl
0.04881	15.44	9.1	5.219e-18	0.5304	Ccl3
0.04879	54.6	46.38	0.0001371	0.5268	Baz1b
0.04878	28.64	21.91	2.656e-08	0.5293	Mcph1
0.04872	49.36	40.93	2.212e-05	0.5284	Cbfb
0.04871	53.19	45.38	0.0004186	0.525	Abl2
0.0487	56.83	48.2	0.0003351	0.5257	Rabep1
0.04858	35.56	27.09	1.861e-09	0.5338	Hspd1
0.04856	44.63	36.23	1.838e-06	0.5303	Pspc1
0.04852	20.13	13.23	8.049e-15	0.5323	Relb
0.0485	12.39	7.173	5.075e-16	0.5258	Serpine1
0.04845	98.5	96.47	0.4442	0.5111	Rrbp1
0.04844	33.56	27.26	1.373e-05	0.5256	Gmds
0.04843	42.94	34.72	1.253e-06	0.5304	Cdc73
0.04839	17.21	9.859	2.292e-22	0.5352	Uap1l1
0.04838	25.5	18.57	1.855e-10	0.531	Dgkh
0.04822	45.54	37.18	3.533e-06	0.5298	Zfp91
0.04816	26.23	20.14	5.795e-08	0.5277	Plekha5
0.04814	11.02	4.832	7.168e-31	0.5305	Tnfsf8
0.04809	30.74	23.32	2.407e-09	0.5318	Marchf8
0.04802	26.14	18.65	1.757e-12	0.534	Cmtm3
0.048	24.91	18.68	1.188e-08	0.5281	Esr1
0.04799	32.1	23.98	2.449e-10	0.5339	Rad50
0.04798	51.46	43.4	0.000201	0.5258	Impact
0.0479	53.1	45.1	0.0001847	0.5262	Wdr1
0.04782	32.19	24.65	3.868e-09	0.5321	Zfyve26
0.0478	44.85	36.89	5.954e-06	0.5292	Pi4ka
0.04776	40.53	32.34	3.996e-07	0.5309	Zc3h13
0.04775	13.84	7.111	1.582e-25	0.5327	ENSMUSG00000120024
0.04765	16.3	9.665	6.02e-19	0.5321	Masp1
0.04765	81.51	74.4	0.951	0.5076	Wdfy4
0.0476	13.89	8.469	1.428e-14	0.5264	Adam22
0.04758	39.94	31.17	2.092e-08	0.5333	Bltp2
0.04758	54.23	45.15	8.694e-05	0.5273	Rab3gap1
0.04757	90.26	86.67	0.7444	0.5089	Tbxas1
0.04756	24.32	15.85	1.345e-17	0.538	Dynlt3
0.04754	53.73	44.75	4.548e-05	0.5281	Acly
0.0475	33.61	24.86	4.832e-11	0.5356	Anp32e
0.04747	45.86	38.16	1.748e-05	0.5281	Usp32
0.04747	71.63	64.88	0.06849	0.5165	A630001G21Rik
0.04745	41.85	33.83	7.05e-07	0.5307	Ccar1
0.04745	41.94	33.78	1.795e-06	0.5297	Gm40645
0.04742	55.37	46.73	0.0002918	0.5257	Ctnnb1
0.04733	29.05	22.42	3.405e-08	0.5293	Cpped1
0.04732	26.82	18.78	3.161e-13	0.5351	Mfsd11
0.04731	86.38	80.95	1	0.5068	Arid1b
0.04729	16.67	9.969	9.558e-19	0.5323	Slamf9
0.04728	39.94	31.59	1.141e-07	0.5319	Ddx21
0.04719	52.64	44.73	0.0002418	0.5257	Mideas
0.04719	52.09	44.1	0.0002567	0.5256	Zzz3
0.04719	62.89	55.75	0.01785	0.5192	Dnajc1
0.04716	44.76	36.14	1.043e-06	0.5309	Ggnbp2
0.04715	25.09	16.68	2.002e-16	0.5375	Atp13a2
0.04714	32.83	25.19	3.094e-09	0.5325	Cep250
0.04712	99.36	99.03	0.1276	0.5152	Plxdc2
0.04712	74.91	67.12	0.2377	0.5131	Usp34
0.04711	20.22	13.44	7.781e-14	0.5314	Prelid2
0.04706	34.47	25.37	1.491e-11	0.5367	Napa
0.04704	76.64	68.95	0.1585	0.5143	Pkn1
0.04699	28.78	21.14	7.51e-11	0.5332	Mbd2
0.04699	76.09	68.51	0.2765	0.5125	Dock11
0.04696	44.9	36.43	3.908e-06	0.5295	Erap1
0.04695	74.86	67.84	0.1362	0.5147	Rab31
0.04694	72.13	65.1	0.1344	0.5147	Dyrk1a
0.04689	43.08	34.21	1.63e-07	0.5323	Slk
0.04684	38.71	31.08	6.859e-07	0.5299	Rap2a
0.04683	35.06	27.31	3.445e-08	0.5314	Ralgapa2
0.04676	85.93	80.34	0.7181	0.509	Cd33
0.04673	57.06	49.26	0.002074	0.5228	Lrp6
0.04673	64.8	57.73	0.05323	0.5168	Rai1
0.04663	57.88	50.09	0.001537	0.5234	Dmxl1
0.0466	60.47	51.25	0.000871	0.5245	Tlr13
0.04655	48.86	40.43	9.752e-06	0.5293	Mia3
0.04652	54.14	45.1	0.0001398	0.5266	Mindy2
0.04651	45.26	36.92	3.445e-06	0.5298	Zzef1
0.04636	29.51	21.65	8.711e-11	0.5334	Igbp1
0.04625	38.89	30.21	1.32e-08	0.5334	Sumf1
0.04624	32.19	23.45	6.223e-12	0.5362	Mybbp1a
0.04615	37.75	29.94	1.438e-07	0.5311	Nemf
0.04614	19.08	12.57	4.169e-14	0.5308	Serac1
0.04614	35.29	26.41	1.866e-10	0.5353	Dstn
0.04613	29.28	21.2	7.166e-12	0.5348	Cmpk1
0.04613	45.22	36.64	2.823e-06	0.53	Bicd2
0.04611	29.64	21.71	2.568e-11	0.5343	Serf2
0.04609	32.15	24.52	4.461e-09	0.532	Tom1
0.04609	38.3	29.8	3.036e-08	0.5325	Acbd5
0.04603	52.5	44.46	0.0005357	0.5245	Ptbp2
0.04603	81.47	76.49	0.4864	0.5107	Ank2
0.04598	26.46	18.6	7.11e-13	0.5345	Cln5
0.04598	28.92	20.92	5.769e-12	0.5348	Hpf1
0.04598	56.47	47.59	0.0004227	0.5253	Ranbp2
0.04584	12.25	5.915	6.007e-27	0.531	Arl5c
0.04582	40.62	31.12	3.699e-09	0.5348	Nono
0.04578	60.97	52.14	0.001217	0.524	Prkar1a
0.04575	25.27	19.49	3.087e-07	0.526	Tspan5
0.04575	37.98	31.11	1.291e-05	0.5268	Snx25
0.04572	49.77	41.32	4.107e-05	0.5277	Usp47
0.04568	41.3	32.96	3.329e-07	0.5312	Hnrnpf
0.04564	19.76	13.4	7.215e-13	0.5302	Sdf2l1
0.0456	51.37	42.51	2.27e-05	0.5287	Stat6
0.04559	26.82	18.76	2.269e-13	0.5353	Rpl30
0.04557	11.07	5.15	1.359e-26	0.529	Iqgap1
0.04557	58.88	50.47	0.001494	0.5235	Map3k2
0.04556	13.3	7.477	7.93e-19	0.5286	Raet1e
0.04555	10.06	4.419	2.528e-28	0.528	Rap2b
0.04549	52.69	44.26	0.0001503	0.5264	Eif4h
0.04547	48.54	40.85	0.000192	0.5255	Bbx
0.04545	11.52	5.079	1.153e-31	0.5316	Tmem154
0.04544	32.47	24.82	6.128e-09	0.5318	Nadk
0.04543	74.41	67.04	0.263	0.5128	Ncor2
0.04539	82.79	75.55	0.8408	0.5082	Slc29a3
0.04539	48.27	39.42	5.04e-06	0.5299	Hnrnpul2
0.04539	100	100	0.04538	0.5179	Rn18s-rs5
0.04538	29.6	21.91	1.866e-10	0.533	Ncf4
0.04538	45.99	37.12	1.17e-06	0.531	Sdha
0.04532	17.94	11.04	1.496e-17	0.5326	Nme2
0.04532	22.18	14.58	8.95e-16	0.5347	Sptbn1
0.04529	38.84	30.35	2.986e-08	0.5327	Snx1
0.04528	45.58	36.18	5.511e-07	0.5316	Set
0.04524	40.07	32.84	5.595e-06	0.5282	Depdc5
0.04521	55.56	47.74	0.002422	0.5224	Exoc6
0.0452	49.5	42.14	0.0003963	0.5246	Eps15l1
0.04498	44.99	36.23	1.991e-06	0.5303	Stt3a
0.04495	17.3	10.93	2.019e-15	0.5304	Anxa4
0.04489	28.37	21.24	9.605e-10	0.5314	Golga3
0.04489	31.92	24.41	4.866e-09	0.5318	Cct2
0.04487	35.61	27.11	1.758e-09	0.5339	Cct8
0.04485	22.86	15.13	1.6e-15	0.535	Pfdn5
0.04477	11.43	6.024	6.236e-20	0.5267	Ulbp1
0.04474	48.77	40.62	5.578e-05	0.5271	Ankib1
0.04472	41.94	34.06	3.711e-06	0.529	Vmp1
0.04472	43.4	36.3	0.0001299	0.5252	Zfp697
0.04468	27.05	19.2	1.397e-12	0.5345	Ncln
0.04468	33.15	25.12	1.125e-09	0.5333	Firre
0.04467	46.4	38.35	4.344e-05	0.527	Ankrd13a
0.04464	54.69	45.52	0.0001503	0.5265	Ociad1
0.04462	15.35	9.333	2.863e-16	0.5292	Crlf2
0.04455	48.77	41.03	0.0001496	0.5259	Ranbp9
0.04453	24.68	17.56	1.24e-11	0.532	Ubap2
0.04448	44.54	36.32	4.398e-06	0.5294	Tubb5
0.04447	35.93	28.19	6.217e-08	0.5313	Immt
0.04442	48.41	40.02	2.537e-05	0.5281	U2surp
0.04442	78.51	71.14	0.38	0.5115	Ncoa3
0.0444	76.14	69.42	0.4099	0.5112	Fto
0.04437	14.75	7.927	1.067e-23	0.533	Zfp991
0.04436	72.63	64.82	0.2002	0.5136	Tnpo1
0.04434	17.3	11.28	1.3e-13	0.5289	Loxl3
0.04434	43.67	35.34	2.146e-06	0.5299	Smc1a
0.04432	26.09	18.85	3.383e-11	0.5323	Ptpn23
0.04431	22.36	15.27	1.429e-13	0.5328	Gde1
0.04429	63.84	54.88	0.008394	0.5208	Cd300c2
0.04428	15.62	9.323	1.523e-17	0.5303	Pkib
0.04427	18.31	11.51	1.561e-16	0.5322	Rpl27a
0.04427	62.43	53.59	0.00425	0.522	Nmt1
0.04426	31.06	23.24	6.564e-10	0.5328	Dennd4b
0.04426	44.13	35.74	2.624e-06	0.5298	Ccdc47
0.04425	33.15	24.9	7.915e-10	0.5335	Tyk2
0.04419	56.74	49.27	0.003646	0.5219	Tmem131l
0.04418	25.32	17.92	2.966e-12	0.5332	Pfkl
0.04413	62.43	53.93	0.008973	0.5206	Pcm1
0.04412	25.87	19.14	2.19e-09	0.5296	Msh5
0.0441	64.71	56.57	0.01528	0.5197	Ifnar2
0.04409	62.07	53.66	0.005105	0.5216	Vwa5a
0.04407	42.99	33.38	1.406e-08	0.5344	Ap3d1
0.04406	21.04	14.87	1.94e-10	0.5283	Nmnat3
0.04405	68.94	61.21	0.06141	0.5166	Fam193a
0.04402	14.21	7.619	4.384e-23	0.532	Amdhd2
0.04402	45.72	37.04	2.232e-06	0.5303	Nfic
0.04401	37.43	29.02	2.832e-08	0.5323	Slc25a36
0.044	99.86	99.79	1.356e-05	0.5324	Hexb
0.04397	47.45	39.34	5.581e-05	0.5269	Lrpprc
0.04394	26.18	19.07	1.428e-10	0.5315	Ssrp1
0.04394	37.98	29.44	3.895e-08	0.5322	Necap2
0.04393	32.24	24.95	2.945e-08	0.5306	Cmas
0.04386	18.44	12.39	1.466e-12	0.5289	Myh10
0.04383	47.95	39.32	1.557e-05	0.5285	Bzw1
0.04383	62.98	55.17	0.01182	0.5201	Cep350
0.0438	40.44	31	4.46e-09	0.5346	Usf2
0.04376	27.6	21.22	7.492e-08	0.5281	Stim2
0.04375	20.31	13.21	2.793e-15	0.5328	Rpl36
0.04374	48.45	39.67	6.498e-06	0.5297	Ik
0.04372	27	19.42	2.627e-11	0.5328	Myl12a
0.04371	65.21	56.7	0.008108	0.521	St13
0.0437	4.964	1.377	1.72e-32	0.5179	Cybb
0.04363	14.44	8.459	1.24e-17	0.5291	Mfsd12
0.04362	11.61	5.649	4.311e-25	0.5293	Hpn
0.04361	36.52	28.42	1.997e-08	0.5324	Myo7a
0.04359	38.07	29.64	3.711e-08	0.5323	Ids
0.04358	44.22	36.24	1.98e-05	0.5276	Kif16b
0.04356	40.66	32.4	4.088e-07	0.5309	Calu
0.04354	37.02	28.7	4.173e-08	0.5318	Adar
0.0435	22.18	14.81	1.768e-14	0.5335	Cuedc2
0.04348	22.36	14.82	3.042e-15	0.5344	Sumo3
0.04345	28.6	20.54	6.512e-12	0.5345	Pes1
0.0434	29.05	21.49	1.9e-10	0.5327	Rbbp7
0.04338	36.16	28.22	9.209e-08	0.5309	Hspa9
0.04336	27.91	21.44	6.101e-08	0.5283	Hspa12a
0.04333	55.42	47.61	0.001388	0.5234	Psen1
0.04322	57.47	49.25	0.0001452	0.5271	Rn7sk
0.04317	22.95	17.42	1.601e-07	0.5254	Wdr25
0.04315	71.45	63.37	0.07327	0.5163	Mafb
0.04314	48.82	41.96	0.0006986	0.5237	Pcca
0.04313	33.15	25.86	1.05e-07	0.5299	Mta3
0.04308	27.55	20.09	7.146e-11	0.5326	Tcp1
0.04308	26.96	20.63	1.088e-07	0.5275	Wdpcp
0.04308	52.46	43.57	0.0001343	0.5264	Krcc1
0.04305	7.969	2.568	2.283e-41	0.5269	Pdcd1
0.04301	76.55	69.55	0.4074	0.5112	Abi1
0.04298	11.34	5.45	2.796e-25	0.5289	Sec14l2
0.04297	40.07	32.31	5.257e-06	0.5282	Commd10
0.04292	44.31	36.21	1.829e-05	0.5277	Ipo7
0.04289	30.42	23.64	9.771e-08	0.529	Chka
0.04285	44.99	36.87	2.523e-05	0.5274	Cds2
0.04281	33.83	26.24	6.029e-08	0.5305	Gpx1
0.04274	12.93	7.244	3.648e-18	0.5277	Clic4
0.04274	32.24	23.77	8.173e-11	0.5346	Sf3a1
0.04274	39.39	31.01	1.412e-07	0.5315	Mcfd2
0.04273	50.91	41.69	4.506e-05	0.5276	Agpat3
0.04272	43.08	36.03	0.000129	0.5251	Umad1
0.04269	12.3	6.332	1.445e-22	0.5292	Nab2
0.04269	43.62	35.12	1.999e-06	0.53	Nucks1
0.04266	26.68	19.57	2.063e-10	0.5315	Ppm1f
0.04265	34.43	26.79	1.112e-07	0.5302	Plekhf2
0.04263	29.01	22.62	1.802e-07	0.528	Prmt3
0.04258	87.43	81.25	1	0.5057	Actr2
0.04257	64.16	55.98	0.01222	0.5201	Wapl
0.04252	38.84	30.44	2.19e-08	0.533	Stat1
0.04249	24.18	16.91	2.071e-12	0.5326	Hs1bp3
0.04246	23.41	16.51	1.784e-11	0.531	Ccng1
0.04241	45.54	38	5.233e-05	0.5267	Pdia4
0.0424	45.81	38.3	5.823e-05	0.5267	Fnbp4
0.04235	49.13	40.61	4.002e-05	0.5276	Ghitm
0.0423	19.99	13.03	5.687e-15	0.5323	Cox7c
0.04229	35.29	27.55	4.635e-08	0.5313	Vps33a
0.04225	45.08	36.3	3.105e-06	0.5298	Srgn
0.04224	9.882	4.576	3.204e-24	0.5262	Gvin3
0.04223	17.85	11.45	1.451e-14	0.5301	4933421O10Rik
0.04222	46.04	38.49	8.036e-05	0.5263	Prpf39
0.04221	22.04	15.56	3.449e-11	0.5299	Map3k8
0.04216	11.48	5.549	2.998e-25	0.5292	Siglecf
0.04215	14.85	9.214	2.562e-14	0.5272	2900026A02Rik
0.04215	16.99	11.29	5.878e-12	0.5271	Rtp4
0.04215	38.43	31.09	7.137e-06	0.5275	Ttc7b
0.04212	72.04	65.34	0.1971	0.5136	Celf1
0.04209	11.89	6.157	1.816e-21	0.5281	Milr1
0.04207	43.76	34.61	5.285e-07	0.5313	Rpn1
0.04207	54.33	46.15	0.001075	0.5236	Hnrnpd
0.04207	59.11	51.94	0.01131	0.5199	Asxl2
0.04203	36.75	28.76	8.265e-08	0.5312	Arpc3
0.04203	63.84	55.73	0.01745	0.5193	Hdlbp
0.04202	53.46	45.96	0.001281	0.5233	Rab6b
0.04196	8.47	3.66	1.672e-24	0.5238	Il1b
0.04193	70.99	63.32	0.1267	0.5148	Larp4b
0.0419	76	68.95	0.6801	0.5093	Peli2
0.04185	62.7	53.81	0.005288	0.5216	Ppp1r9b
0.04184	28.87	21.04	1.049e-10	0.5329	Ipmk
0.04181	12.3	8.431	1.079e-07	0.5189	Ccdc192
0.04181	74.5	69.76	0.4239	0.5111	Apba1
0.0418	38.66	30.84	6.896e-07	0.5299	Mtpn
0.04172	53.87	45.14	0.0006735	0.5242	Add1
0.04164	51.37	43.42	0.0005586	0.5243	Pou2f1
0.04163	56.15	48.24	0.003717	0.5217	Ecpas
0.04157	41.62	34.3	2.511e-05	0.5269	Ube2w
0.04156	26.5	20.33	1.541e-07	0.527	Adarb1
0.04154	27.05	19.91	4.637e-10	0.5312	Dnajc10
0.04154	54.69	46.45	0.002069	0.5226	Ehmt1
0.04153	36.79	29.73	2.191e-06	0.5283	Rxra
0.04153	41.58	33.53	4.924e-06	0.5286	Dclre1c
0.04148	31.65	26.19	5.052e-05	0.5238	Rbpms
0.04142	62.61	54.32	0.02164	0.5187	Pacs1
0.04142	62.11	56.15	0.0484	0.517	Tmcc1
0.04141	5.829	1.187	1.554e-57	0.5232	Ctse
0.04141	69.44	61.79	0.05942	0.5167	Scaf11
0.04139	32.47	24.97	1.815e-08	0.531	Ppib
0.0413	26.64	19.02	1.305e-11	0.533	ENSMUSG00000121501
0.0413	79.14	72.99	0.6244	0.5096	Nfkb1
0.04127	15.26	9.323	1.551e-15	0.5285	Ccnb1ip1
0.04126	30.87	23.94	4.287e-08	0.5298	Rnf41
0.04119	37.8	29.93	5.111e-07	0.5299	Atl3
0.04118	94.4	90.18	1	0.5039	Unc93b1
0.04113	8.333	3.09	2.198e-33	0.526	Bcl2a1d
0.04113	37.66	30.48	3.522e-06	0.5281	Zranb2
0.04109	48.54	39.95	3.766e-05	0.5275	Ubn1
0.04108	47.77	39.19	2.25e-05	0.5281	Adam15
0.04107	8.925	3.546	4.944e-31	0.5266	Gpr65
0.04107	35.66	28.49	1.899e-06	0.5281	Mad1l1
0.04107	40.26	32.26	1.924e-06	0.5292	Atp5c1
0.04105	12.52	6.959	4.388e-18	0.5271	Cstb
0.04102	33.06	25.01	1.594e-09	0.533	9530068E07Rik
0.04098	46.27	37.63	7.742e-06	0.529	U2af2
0.04096	24.73	17.8	7.268e-11	0.5311	Ptgr2
0.04095	35.38	28.71	7.832e-06	0.5267	Srbd1
0.04093	48.41	41.75	0.003207	0.5212	Pcdhgb2
0.04092	33.33	25.6	3.368e-08	0.5308	Cdip1
0.0409	29.19	21.73	1.878e-09	0.5312	Atp11a
0.04086	85.34	78.23	1	0.506	Cdc42
0.04086	19.49	12.62	8.561e-15	0.5317	Cyb5r3
0.04086	31.56	23.72	3.429e-09	0.5318	Ccpg1
0.04085	51	41.65	4.23e-05	0.5277	Znfx1
0.04083	41.44	33.81	7.608e-06	0.5281	Leng8
0.04082	27.46	19.84	2.785e-11	0.5331	Mlf2
0.04082	32.15	24.62	1.595e-08	0.531	Arl5a
0.04078	17.08	10.96	5.765e-14	0.5289	Slfn9
0.04073	20.99	14.24	4.101e-13	0.5313	Mcoln1
0.04071	23.04	16.49	1.347e-10	0.5298	Cpt1a
0.04067	21.45	14.98	2.886e-11	0.5295	Dse
0.04066	28.83	21.78	1.429e-08	0.5297	Txndc16
0.04065	16.53	10.18	5.771e-16	0.53	Kdm5d
0.04065	45.63	38.35	0.0001342	0.5255	Rala
0.04063	22.77	15.76	2.245e-12	0.5317	Sh2b1
0.04063	27.73	20.52	1.386e-09	0.5308	Smcr8
0.04063	46.63	38.79	9.561e-05	0.5261	Heca
0.04063	57.42	49.91	0.008096	0.5205	Atxn7
0.04057	6.603	1.894	4.822e-41	0.5235	C4b
0.04055	26.68	19.23	4.482e-11	0.5324	Afg3l2
0.04055	29.05	21.3	3.829e-10	0.5322	Zc3h12c
0.04054	35.11	27.54	1.262e-07	0.5304	Trappc10
0.04052	19.54	13.5	4.244e-11	0.5281	Zdhhc21
0.04051	31.47	23.72	2.409e-09	0.5321	Iars2
0.04047	60.38	52.75	0.02076	0.5187	Hmbox1
0.04045	50.32	41.87	0.0002559	0.5252	Syncrip
0.04044	33.2	25.97	1.598e-07	0.5295	Tmem127
0.04038	50.23	42.4	0.0005989	0.524	Ago1
0.04035	52.28	44.94	0.002583	0.522	Scaper
0.04035	99.09	97.8	0.5891	0.51	Selenop
0.04034	24.77	17.79	4.706e-11	0.5313	Ube3b
0.04031	21.63	15.07	2.572e-11	0.5297	Tnip1
0.04031	42.81	35.32	3.424e-05	0.5267	Tmem184b
0.04029	56.28	48.53	0.007533	0.5205	Trip11
0.04027	22.36	15.99	2.958e-10	0.5289	Eif1a
0.04021	56.42	48.24	0.001984	0.5228	P4hb
0.04019	32.7	25.04	1.668e-08	0.5311	Ccdc82
0.04015	37.3	29.35	2.437e-07	0.5304	Ypel3
0.04006	30.24	22.89	1.238e-08	0.5304	Nfkbia
0.04002	23.45	16.54	2.092e-11	0.531	Scarna2
0.04002	24.36	17.65	5.133e-10	0.5297	Casp4
0.04001	54.64	46.13	0.0008736	0.5239	Sel1l
0.04	49.5	41.8	0.0005538	0.5241	Rlf
0.04	48.54	42.03	0.001891	0.5222	Tfeb
0.03999	17.76	11.72	8.038e-13	0.5285	Nfkb2
0.03989	26.28	19.47	3.335e-09	0.5295	Gpr160
0.03988	36.57	28.58	2.22e-07	0.5302	Vps39
0.03987	23.27	16.04	1.209e-12	0.5322	1600014C10Rik
0.03987	36.07	27.87	3.296e-08	0.5317	Sec61a1
0.03987	34.11	26.8	3.404e-07	0.5292	Snx3
0.03983	49.73	41.95	0.000406	0.5246	Safb2
0.03982	45.22	37.22	2.979e-05	0.5273	Spcs3
0.03982	44.9	37.64	0.0001388	0.5254	Snap23
0.0398	81.33	75.1	0.7792	0.5086	Rtn4
0.0398	26.78	20.17	8.433e-09	0.5292	Iqce
0.03979	30.28	23.04	1.148e-08	0.5305	Scn1b
0.03977	23.82	16.97	3.683e-11	0.5309	Jak3
0.03977	28.32	20.74	1.95e-10	0.5323	Eif3b
0.03977	59.97	51.92	0.008771	0.5205	Ube2d3
0.03973	43.58	35.46	8.345e-06	0.5284	Samd8
0.03971	10.25	4.98	3.394e-22	0.526	Enpp1
0.03967	38.07	30.66	2.884e-06	0.5283	Sh3tc1
0.03963	13.3	7.439	1.36e-18	0.5283	Mical1
0.03961	19.31	12.95	1.059e-12	0.5296	Pogk
0.0396	18.62	12.18	6.704e-14	0.5302	Tmed3
0.03958	32.06	24.35	2.002e-08	0.5307	Gas5
0.03958	77.28	70.73	0.5306	0.5103	Arhgap17
0.03954	19.31	12.44	4.636e-15	0.5318	Cox6a1
0.03953	48.32	41.38	0.0006922	0.5237	Tent2
0.03951	95.08	92.24	1	0.5015	Inpp4b
0.0395	38.16	30.24	6.178e-07	0.5298	Bnip3l
0.0395	58.29	51.37	0.02072	0.5186	Slc7a7
0.03943	27.46	20.19	5.915e-10	0.5312	Eno1
0.03939	59.38	52.43	0.00868	0.5205	Arhgef2
0.03938	63.16	56.75	0.06542	0.5163	Phip
0.03936	8.47	4.082	6.805e-19	0.5218	Gm49393
0.03931	30.92	24.32	4.996e-07	0.5278	Gigyf1
0.03929	32.6	24.79	1.093e-08	0.5314	Ctso
0.03929	41.44	34.09	5.14e-05	0.5259	Tango2
0.03927	17.67	11.91	1.414e-11	0.5272	Zfp992
0.03926	10.06	4.866	4.45e-22	0.5256	Capg
0.03924	22.04	15.9	1.252e-09	0.5279	Cep290
0.03924	41.39	34.01	1.404e-05	0.5275	Ctsf
0.03921	15.66	9.969	2.16e-13	0.5272	Pxdc1
0.03921	29.23	22.58	1.409e-07	0.5282	Mapk1ip1
0.03917	87.7	80.89	1	0.5015	Sh3glb1
0.03912	52.41	44.65	0.001238	0.5232	Tgs1
0.0391	55.15	47.15	0.001322	0.5234	Prrc2b
0.03909	42.85	35.21	2.633e-05	0.527	Ireb2
0.03904	41.21	33.68	2.648e-05	0.5266	Micu1
0.03897	53.87	45.79	0.001197	0.5234	Tmem30a
0.03896	64.44	55.49	0.01954	0.519	Laptm4a
0.03895	18.58	12.53	4.259e-12	0.5285	Kif1c
0.0389	36.29	29.3	9.72e-06	0.5266	Gabpb2
0.03887	11.89	6.342	1.762e-19	0.527	Gsto1
0.03886	33.52	26.36	5.059e-07	0.5286	Tmed9
0.03882	28.78	20.8	3.779e-11	0.5335	Tex261
0.03881	30.87	23.82	9.949e-08	0.5291	Cep43
0.0388	15.07	9.556	3.16e-13	0.5265	Trpv4
0.0388	38.93	32.56	0.000176	0.524	Stau2
0.03879	27.09	20.87	3.817e-07	0.5265	Wars2
0.03876	27.05	20.06	1.315e-09	0.5305	Akt2
0.03876	18.44	13.62	2.015e-07	0.5228	Alpk1
0.03876	46.08	38.28	0.0001272	0.5256	5031439G07Rik
0.03874	20.45	13.79	9.587e-13	0.5304	Cox8a
0.03874	37.11	29.94	5.255e-06	0.5275	Klc1
0.03873	41.67	33.67	5.391e-06	0.5285	Ckap5
0.03868	26.78	22.1	0.0001381	0.5212	Znrf3
0.03867	19.44	12.44	1.739e-15	0.5322	Snx32
0.03866	36.98	29.52	1.014e-06	0.5291	Ganab
0.03864	76.59	69.51	0.3835	0.5115	Ywhae
0.03861	44.17	37.05	0.0002505	0.5244	Csnk1g1
0.0386	20.54	13.32	4.643e-15	0.5327	Rpl29
0.0386	20.17	14.24	3.348e-10	0.5275	Tbc1d32
0.0386	43.72	36.08	6.299e-05	0.5261	Ttc14
0.03858	13.3	7.994	1.99e-14	0.5256	Slfn2
0.03858	53.37	44.79	0.001104	0.5234	Rc3h1
0.03854	55.42	47.77	0.007005	0.5206	Rsu1
0.03851	35.97	28.19	5.223e-07	0.5293	Cdk11b
0.03849	29.64	23.08	4.757e-07	0.5273	Dnaaf9
0.03847	30.46	23.5	1.193e-07	0.5287	Polr3b
0.03839	20.99	14.41	5.094e-12	0.5301	Nsa2
0.03836	11.34	5.919	6.115e-20	0.5265	Pdgfa
0.03836	26.87	20.45	3.959e-08	0.5282	Cul9
0.03835	17.81	11.94	1.347e-11	0.5273	Rusc2
0.03835	57.47	50.07	0.008436	0.5204	Synj1
0.03833	19.22	12.97	1.989e-12	0.5293	Tbc1d24
0.0383	19.22	13.39	1.871e-10	0.5271	Mmd
0.0383	26.09	19.62	1.576e-08	0.5285	Mtmr14
0.03826	17.12	11.18	5.801e-13	0.5281	Slc11a2
0.03825	50.96	42.41	0.0002624	0.5253	Actg1
0.03823	38.8	29.92	8.448e-08	0.5316	Nub1
0.03822	30.83	23.33	1.84e-08	0.5303	Slc45a4
0.0382	78.51	72.25	0.8273	0.5083	Phf21a
0.03816	64.25	55.91	0.03345	0.5178	Mia2
0.03812	60.38	53.54	0.07839	0.5157	Atg10
0.03812	67.99	60.87	0.1666	0.514	Ubr5
0.03811	48.09	40.31	0.0005519	0.5239	Relch
0.0381	20.99	14.53	1.48e-11	0.5296	Inppl1
0.03809	73.86	65.84	0.559	0.51	Ppp2r5c
0.03807	40.62	32.72	5.81e-06	0.5282	G3bp1
0.03806	7.969	4.481	2.855e-11	0.5174	AY512915
0.03806	32.83	25.24	2.208e-08	0.531	Ipo5
0.03805	22.13	15.29	9.586e-12	0.5305	Tecpr1
0.03805	37.7	30.3	3.005e-06	0.5282	Cpsf3
0.03799	15.39	10.32	1.277e-10	0.5245	Niban2
0.03799	54.83	46.92	0.003544	0.5217	Kidins220
0.03798	62.66	54.53	0.02747	0.5182	Zfr
0.03797	50.64	42.81	0.0006069	0.5241	Tbc1d9b
0.03795	32.74	26.21	3.291e-06	0.5267	Tmem168
0.03792	30.33	22.88	9.724e-09	0.5306	Atn1
0.03792	41.12	32.47	8.239e-07	0.5302	Gnai3
0.03791	61.61	52.77	0.02541	0.5182	Myo18a
0.0379	34.74	27.63	1.716e-06	0.5279	Dnajb11
0.03788	37.7	29.89	1.049e-06	0.5292	Psmd11
0.03783	27.41	21.01	1.256e-07	0.5275	Tbca
0.03778	25.68	19.86	6.699e-07	0.5255	Slc2a9
0.03772	15.07	9.1	4.191e-16	0.5287	Stk11ip
0.03771	18.67	12.43	1.198e-12	0.529	Neu1
0.03771	27.5	21.57	1.87e-06	0.5254	Dph6
0.03768	28.83	22.45	9.197e-07	0.5265	Epm2a
0.03767	44.44	37.29	0.0002269	0.5246	Rabl6
0.03764	40.53	32.66	5.253e-06	0.5283	Ssr3
0.03762	28.37	21.43	1.965e-08	0.5293	Gm7072
0.03759	42.58	35.01	2.92e-05	0.5268	Gcn1
0.03758	85.56	78.64	1	0.5032	Gdi2
0.03757	25.64	19.05	7.452e-09	0.5287	Lima1
0.03757	30.19	24.09	4.385e-06	0.5257	Stx6
0.03757	50.05	42.35	0.0008237	0.5235	Prkacb
0.03753	41.07	33.5	2.605e-05	0.5266	Nnt - ENSMUSG00000025453
0.0375	23.59	16.91	3.365e-10	0.5295	Paqr7
0.0375	29.64	22.58	3.783e-08	0.5293	Vps18
0.03745	23.77	16.65	1.486e-11	0.5313	Vars
0.0374	45.13	38.58	0.0008901	0.5228	Xpo7
0.03738	41.67	34.55	8.81e-05	0.5253	Stim1
0.03737	10.2	4.847	1.691e-23	0.5264	Ctla2b
0.03736	70.36	63.47	0.3694	0.5115	Foxo3
0.03731	22.5	16.06	3.078e-10	0.5289	Pdha1
0.0373	62.02	53.89	0.027	0.5182	Zfand6
0.03728	50.18	42.76	0.0007183	0.5238	Atp6ap2
0.03727	41.07	34.13	7.141e-05	0.5255	St3gal2
0.03727	47.59	39.93	0.0003689	0.5244	Hnrnpab
0.03726	57.38	49.53	0.00826	0.5204	Tmem245
0.03724	63.52	55.21	0.04685	0.517	Sec14l1
0.03721	20.58	14.72	2.238e-09	0.5267	Septin11
0.03721	25.68	19.2	7.391e-09	0.5288	Gars
0.03718	93.76	89.66	1	0.5011	Lair1
0.03715	16.3	10.07	1.905e-15	0.5294	Ggh
0.03712	79.01	72.89	1	0.5065	Lrrk1
0.03711	62.02	57.51	0.357	0.5114	Fat3
0.03707	30.28	23.75	8.24e-07	0.5271	Fbxo42
0.03696	74.95	69.03	0.5034	0.5105	Rtn3
0.03695	37.48	31.14	0.0001378	0.5239	Crybg3
0.03692	46.31	38.96	0.0005096	0.5237	Cyld
0.03689	32.83	24.87	1.176e-08	0.5314	H2-T24
0.03686	30.37	24.71	2.918e-05	0.5239	Atg7
0.03686	68.62	61.64	0.2117	0.5133	Fndc3a
0.03685	19.63	13.56	4.882e-11	0.528	Megf8
0.03683	34.97	27.58	8.184e-07	0.5286	Aco2
0.03675	42.08	34.99	0.0001252	0.525	Atg5
0.0367	34.47	26.91	2.438e-07	0.5295	Tmem33
0.03668	23.13	16.03	5.151e-12	0.5314	Myl6
0.03667	30.78	23.22	7.484e-09	0.5309	Cat
0.03656	27.19	20.44	1.324e-08	0.529	Ddrgk1
0.03651	40.98	33.26	8.263e-06	0.5279	Trp53
0.03651	44.54	37.44	0.0002851	0.5243	Ilrun
0.03651	74.73	66.98	0.5708	0.51	Ccdc50
0.03648	57.15	48.72	0.003969	0.5217	Acp2
0.03647	12.89	7.776	8.126e-14	0.5248	A930007I19Rik
0.03645	4.781	0.8117	2.329e-57	0.5199	C3
0.03642	82.38	75.36	1	0.5032	Eif4g3
0.03639	72.72	65.2	0.399	0.5112	Brd4
0.03637	39.8	32.05	8.776e-06	0.5275	Atp6v0d1
0.03636	39.39	32.22	4.498e-05	0.5256	Otud4
0.03635	74.27	67.71	0.6778	0.5093	Ap3b1
0.03634	4.645	1.419	3.14e-26	0.5161	Gas7
0.03634	19.13	13.73	1.056e-08	0.5249	Apex2
0.0363	32.38	25.45	8.818e-07	0.5278	Nsun2
0.03627	56.33	49.09	0.01356	0.5194	Khdrbs1
0.03626	16.48	10.88	9.206e-12	0.5264	Ppfibp1
0.03626	64.12	55.55	0.04519	0.5171	Erp29
0.03622	48.72	40.06	0.0001261	0.526	Yme1l1
0.03618	57.83	50.57	0.01745	0.5189	Mlph
0.03617	17.58	11.44	2.92e-13	0.5287	Aldh2
0.03615	22.63	15.86	3.777e-11	0.5301	Rexo4
0.03615	43.81	36.12	8.888e-05	0.5257	Smarcc1
0.03615	52.41	44.58	0.003667	0.5214	Fbxw4
0.03613	47.63	39.97	0.0003461	0.5245	Mapre1
0.03611	23.86	17.56	8.287e-09	0.5277	Tpcn2
0.03609	48.45	39.74	0.000135	0.5258	Ywhag
0.03607	61.57	54.12	0.05323	0.5166	Vps13d
0.03606	23.32	17.07	4.722e-09	0.5278	Hnrnpll
0.03605	86.48	81.33	1	0.5043	Ankrd11
0.03603	41.44	33.38	6.46e-06	0.5282	Rab5c
0.03598	28.78	23.13	1.512e-05	0.524	Rhbdd1
0.03596	20.45	14.49	5.43e-10	0.5274	Cpsf1
0.03595	13.34	7.871	2.757e-15	0.5262	Ramp1
0.03593	13.11	7.757	3.107e-15	0.526	mt-Nd6
0.03593	28.14	20.65	1.11e-09	0.531	Srsf1
0.03593	66.35	58.59	0.1067	0.5151	Xiap
0.0359	21.58	15.01	2.108e-11	0.5298	Stxbp2
0.0359	60.52	53.24	0.02597	0.5182	Cnot1
0.03589	26.14	19.39	5.771e-09	0.5291	Irak4
0.03588	13.8	8.602	4.925e-13	0.5251	Slc16a3
0.03588	48.59	41.46	0.001482	0.5225	Slc43a2
0.03581	12.61	7.258	4.742e-16	0.526	Sfxn3
0.03581	38.34	31.14	1.985e-05	0.5263	Icam1
0.03577	26.28	18.73	4.492e-11	0.532	Emc1
0.0357	35.06	27.73	1.004e-06	0.5285	Rtf2
0.03568	55.65	47.4	0.003769	0.5216	Arhgef1
0.03565	26.18	19.69	4.067e-08	0.5278	Utp14a
0.03561	41.94	34.3	4.916e-05	0.526	Mapk8ip3
0.03561	51.64	43.24	0.0002743	0.5253	Spcs2
0.0356	8.47	3.427	4.663e-28	0.5249	Il1r1
0.03559	57.56	50.34	0.02577	0.518	Vps41
0.03558	37.2	30.56	5.377e-05	0.525	Ube2e1
0.03556	73.82	67.51	0.5442	0.5101	Eml4
0.03554	26.96	20.23	2.297e-08	0.5285	Cln3
0.03551	12.93	7.472	3.629e-16	0.5264	Akap1
0.0355	38.25	31.27	2.511e-05	0.5261	Pdxdc1
0.03548	14.85	9.347	2.622e-13	0.5263	Syngap1
0.03547	33.29	26.01	5.835e-07	0.5284	Cdc123
0.03547	31.6	25.36	6.96e-06	0.5257	Chfr
0.03547	81.74	75.23	1	0.506	Snx5
0.03547	54.87	47.62	0.01371	0.5192	Abcc5
0.03546	36.52	28.85	8.173e-07	0.5291	Slc25a3
0.03544	23.68	16.52	1.259e-11	0.5313	Slc25a4
0.03535	14.25	8.886	5.299e-13	0.5255	Kcnj12
0.03534	32.33	25.81	7.537e-06	0.5257	Tsga10
0.03531	27.69	21.1	8.457e-08	0.5279	Ciz1
0.0353	53.73	46.06	0.008824	0.5199	Slc16a7
0.03528	38.43	31.57	4.359e-05	0.5255	Edem2
0.03526	17.85	12.07	2.497e-11	0.5271	Atp6v1f
0.03526	29.78	22.5	2.95e-08	0.5295	Retreg3
0.03526	47.59	39.85	0.0005368	0.5238	Tmem87a
0.03521	31.42	24.77	2.679e-06	0.5264	Nin
0.03521	66.26	58.33	0.1438	0.5143	Ube2k
0.03519	15.48	11.05	1.494e-07	0.521	Pola1
0.03516	45.77	37.96	0.0001121	0.5257	Myl12b
0.03515	18.67	12.13	7.48e-14	0.5301	ENSMUSG00000121395
0.03514	34.56	26.85	2.437e-07	0.5295	Hprt
0.03514	34.7	27.26	1.075e-06	0.5282	Max
0.03511	43.81	36.74	0.0002697	0.5243	Atxn2l
0.03511	50.23	43.81	0.01185	0.5191	Ralgapa1
0.0351	20.26	13.78	7.907e-12	0.5293	Ankrd16
0.03509	40.48	33.43	0.000106	0.5248	Dock9
0.03502	36.48	29.55	1.391e-05	0.5263	Sh2b2
0.03502	41.3	33.61	2.299e-05	0.5268	Actn4
0.03502	48	40.49	0.001505	0.5223	Cwf19l2
0.035	34.29	27.66	8.617e-06	0.5262	Xpo1
0.03497	41.76	34.6	7.73e-05	0.5255	Riok3
0.03496	21.99	15.95	2.834e-09	0.5274	Slc39a1
0.03494	35.52	28.55	1.261e-05	0.5261	Trim14
0.03494	38.11	31.2	3.246e-05	0.5258	Bdp1
0.0349	35.52	28.98	2.324e-05	0.5255	Atp6v1e1
0.0349	44.4	37.59	0.00109	0.5224	Ahcyl2
0.03486	18.67	12.44	1.917e-12	0.5288	Nudt9
0.03486	35.52	28.44	4.077e-06	0.5273	Unk
0.03486	33.42	27.35	5.281e-05	0.5241	Vps13a
0.03485	20.86	14.86	1.244e-09	0.5271	Atp6v0c
0.03485	56.51	48.49	0.01379	0.5193	Phf20l1
0.03483	18.17	13.26	8.503e-08	0.5231	Prdm1
0.03479	62.66	55.06	0.06056	0.5164	Mark2
0.03477	36.11	28.43	7.574e-07	0.529	Supt5
0.03476	45.95	38.05	0.0002382	0.5247	Ube4b
0.03475	34.52	27.91	1.411e-05	0.5258	Suz12
0.03475	39.89	34.05	0.001347	0.5214	Hivep1
0.03472	58.42	51.5	0.04855	0.5167	Osbpl8
0.03468	23.41	16.54	1.35e-10	0.5298	Slc38a7
0.03467	5.783	1.585	1.824e-38	0.521	Gas2l3
0.03466	13.8	8.478	1.137e-13	0.5256	Gga2
0.03462	77.32	71.49	1	0.5071	Dennd1a
0.03458	38.16	30.43	5.799e-06	0.5275	Rab12
0.03457	34.38	27.41	4.663e-06	0.5268	Rimoc1
0.03453	22.09	15.91	2.257e-09	0.5275	Tbc1d19
0.03447	75.68	68.54	0.9546	0.5075	Atrx
0.03446	69.81	63.05	0.4688	0.5106	Zfp148
0.03445	62.8	55.72	0.1418	0.5142	Pum1
0.03444	18.21	12.48	2.274e-10	0.5262	Galnt3
0.03442	49.32	42.05	0.001573	0.5225	Sec63
0.03441	54.1	47.42	0.01745	0.5186	Atp11c
0.03439	52.37	44.8	0.004738	0.5209	Luc7l3
0.03438	27	20.27	2.339e-08	0.5285	Pa2g4
0.03437	77.23	70.23	0.8571	0.5081	Rab14
0.03436	31.6	24.72	1.014e-06	0.5273	Parp4
0.03434	28.83	21.84	7.778e-08	0.5284	Luc7l
0.0343	22.63	16.5	4.881e-09	0.5274	Pigt
0.03429	45.54	37.56	0.0002039	0.5248	Selenot
0.03424	18.67	12.94	2.636e-10	0.5265	Nup155
0.03424	22.27	16.4	1.675e-08	0.5265	Naa12
0.03424	25.96	19.42	3.551e-08	0.5277	Tgif1
0.03416	35.06	27.82	2.183e-06	0.5277	Clptm1l
0.03416	41.07	33.64	5.944e-05	0.5256	Ddb1
0.03414	29.51	22.88	5.522e-07	0.5271	Atm
0.03413	57.15	50.13	0.04355	0.5169	Sgms1
0.03411	28.32	21.53	5.672e-08	0.5285	Sars
0.0341	35.7	27.49	1.646e-07	0.5301	Copb2
0.0341	57.42	49.07	0.009354	0.5201	Mapre2
0.03409	43.81	36.11	0.0001998	0.5246	Gatad2a
0.03409	40.76	34.02	0.0002066	0.5241	Camta2
0.03408	20.08	14.19	8.617e-10	0.5269	Esyt1
0.03405	29.92	23.53	1.482e-06	0.5265	Ergic2
0.03405	67.76	61.22	0.2765	0.5124	Ccdc93
0.03404	13.25	8.269	2.468e-12	0.524	Pgap1
0.03402	36.43	29.63	2.934e-05	0.5255	Ralbp1
0.034	27.09	20.85	4.917e-07	0.5263	Taf1b
0.03399	58.79	51.69	0.0268	0.518	Arfgef1
0.03398	37.66	30.65	4.597e-05	0.5252	Pik3r6
0.03392	27.37	20.67	5.385e-08	0.5281	Cct5
0.03389	66.94	58.9	0.2135	0.5132	Tmem131
0.03385	13.98	8.056	2.251e-17	0.5283	Klc4
0.03385	32.06	25.65	4.727e-06	0.5262	Gtpbp2
0.03385	44.26	36.78	0.0002304	0.5245	Copb1
0.03385	60.38	52.23	0.03621	0.5174	Dnajc7
0.03383	20.67	15.28	7.682e-08	0.5246	Esf1
0.03383	68.81	61.35	0.3467	0.5116	Rasa3
0.03383	73.5	66.15	0.6982	0.5091	Rap1a
0.03381	25.09	18.64	1.221e-08	0.5281	Tkt
0.03376	37.3	30.1	1.184e-05	0.5266	Lats1
0.03375	48.41	39.98	0.000229	0.5251	Ubxn4
0.03371	30.65	23.43	1.281e-07	0.5287	Ptpn11
0.03371	39.8	32.18	3.203e-05	0.526	Ccnl2
0.03371	43.17	36.52	0.000795	0.5227	Sos1
0.03371	48.45	41.18	0.002236	0.5218	Cdyl
0.03369	32.6	25.82	1.507e-06	0.5274	Insyn2b
0.03368	19.17	12.92	9.227e-12	0.5284	Mvp
0.03364	33.33	27.43	0.0001514	0.5228	Akap7
0.03364	50.82	43.85	0.005367	0.5206	Prkd3
0.03361	29.87	22.99	2.254e-07	0.528	Exoc1
0.03361	38.71	32.71	0.0009959	0.5216	Ehbp1
0.03359	28.83	21.83	4.228e-08	0.5288	Rnf4
0.03358	75.82	68.74	0.8836	0.5079	Sfpq
0.03356	29.19	24.12	0.0002325	0.5213	Cnnm2
0.03355	24.64	18.21	8.528e-09	0.5281	Tle5
0.03354	17.62	12.09	2.207e-10	0.5259	Tmem19
0.03353	29.6	22.26	1.211e-08	0.5301	Bag6
0.03353	26.14	19.81	1.709e-07	0.5267	Rab20
0.03353	46.27	38.59	0.0003957	0.5241	Elk4
0.03352	12.11	6.931	9.843e-16	0.5252	P3h3
0.03352	26.96	20.36	6.575e-08	0.5277	Eif3e
0.03351	56.83	49.82	0.0325	0.5175	Nedd4l
0.03348	18.72	12.94	2.149e-10	0.5267	Cpsf4
0.03343	43.31	35.96	0.0002666	0.5241	Rcor1
0.03342	36.98	30.39	7.614e-05	0.5245	Atp6v1h
0.03341	37.39	30.92	0.0001656	0.5237	Cbfa2t2
0.03339	69.26	62.35	0.4218	0.511	Strn3
0.03336	37.48	29.92	7.238e-06	0.5271	Gpr146
0.03335	20.54	14.6	1.652e-09	0.5268	Rbm19
0.0333	9.973	6.057	9.214e-11	0.5194	Baiap2
0.0333	34.88	28.17	1.557e-05	0.5257	Wwp1
0.03327	23.63	17.35	8.295e-09	0.5276	Alas1
0.03327	56.06	48.18	0.02389	0.518	Dlgap4
0.03326	26.14	19.83	1.347e-07	0.5269	Dnajc2
0.03326	57.15	49.4	0.01978	0.5185	Hltf
0.03322	43.99	35.98	4.669e-05	0.5265	Plod3
0.03319	24.23	17.89	1.556e-08	0.5275	4933434E20Rik
0.03317	9.608	4.804	5.284e-19	0.5236	Mif
0.03317	50.73	44.03	0.005709	0.5205	Chd8
0.03315	23.41	16.81	7.614e-10	0.5289	Vamp8
0.03315	56.01	48.73	0.009342	0.5201	Pdia6
0.0331	6.193	1.78	3.054e-38	0.522	Olfm4
0.03306	27.37	20.6	4.323e-08	0.5282	Sar1a
0.03303	40.57	33.58	0.000164	0.5243	Brd7
0.03301	17.67	12.98	4.745e-07	0.5217	Cracr2a
0.033	35.66	27.8	4.499e-07	0.5293	Cct4
0.03297	28.55	21.47	1.933e-08	0.5293	Copg1
0.03296	38.07	30.53	9.842e-06	0.527	Tmem106b
0.03296	36.93	30.74	0.0001659	0.5236	Arl6ip5
0.03296	52.28	45.15	0.01425	0.5189	Il21r
0.03294	23.91	17.1	4.224e-10	0.5295	Kdsr
0.03292	23.77	17.27	2.957e-09	0.5283	Ptdss1
0.03292	29.19	21.99	3.641e-08	0.5291	Gm44250
0.03289	34.15	27.96	6.229e-05	0.5241	Dhx57
0.03288	97.09	95.17	1	0.5027	Zeb2
0.03287	33.01	26.53	1.293e-05	0.5254	Hbp1
0.03286	27.28	21.23	2.049e-06	0.5252	Atr
0.03286	35.11	27.79	2.483e-06	0.5276	Nfe2l1
0.03284	40.66	34.82	0.002962	0.5203	Kat6b
0.03283	53.46	46.13	0.005566	0.5208	Macroh2a1
0.03281	35.2	28.17	7.033e-06	0.5266	Ddx46
0.0328	13.89	11.26	0.00335	0.513	Sugct
0.03276	41.39	34.17	0.0001263	0.5248	Supt6
0.03273	31.79	25.85	6.498e-05	0.5234	Mnat1
0.03271	33.33	26.46	3.083e-06	0.5269	Ccdc6
0.03267	32.7	26.18	6.618e-06	0.526	Fbh1
0.03266	23	16.62	1.868e-09	0.5281	Anxa6
0.03265	41.85	34.99	0.0004217	0.5233	Csnk2a1
0.03264	6.785	2.635	1.111e-24	0.5206	Cd72
0.03263	40.57	32.53	2.355e-05	0.5265	Cyria
0.03262	27.5	22.77	0.0004725	0.52	Camkmt
0.03262	43.53	36.47	0.0005749	0.5231	Acbd3
0.03262	36.38	30.9	0.001351	0.5207	Cwc27
0.03261	22.22	16.4	4.606e-08	0.5257	Tram2
0.03259	51.64	44.37	0.005344	0.5207	Arhgdib
0.03257	27.23	20.54	5.22e-08	0.528	Myadm
0.03254	9.517	5.027	2.856e-16	0.5222	Arl11
0.03253	50.77	43.03	0.002506	0.5218	Zscan26
0.03251	19.54	13.34	2.743e-11	0.5282	Klk8
0.03251	26.91	21.3	1.016e-05	0.5237	Zfp951
0.0325	33.29	26.84	1.769e-05	0.5252	Rab40c
0.03248	35.66	28.52	6.129e-06	0.5269	Flii
0.03247	32.97	26.21	4.453e-06	0.5264	Pon2
0.03246	14.12	9.181	5.825e-11	0.5236	Prmt2
0.03246	35.43	28.49	1.525e-05	0.5259	Chm
0.03245	17.99	11.72	4.605e-13	0.5288	Ubxn1
0.03244	37.57	30.27	1.247e-05	0.5266	Fbrs
0.03241	42.9	36.06	0.0006367	0.5229	Cyth1
0.03237	92.3	89.67	1	0.5028	Maml2
0.03234	23.77	17.38	6.477e-09	0.5278	Rab1b
0.03233	37.48	30.62	5.272e-05	0.525	Uba1
0.03232	14.66	9.546	2.958e-11	0.5244	Abca2
0.03232	24.73	18.17	1.72e-08	0.5276	Abcc1
0.03231	31.6	24.66	1.014e-06	0.5273	Bcap29
0.0323	25.91	19.61	1.062e-07	0.527	Psmd2
0.0323	36.93	29.67	9.453e-06	0.5268	Gm21970
0.03228	18.08	12.63	1.395e-09	0.5253	Zc3h12a
0.03225	15.44	10.35	2.09e-10	0.5242	Chst15
0.03225	39.8	33.29	0.0004655	0.5228	B3galt5
0.03224	22.95	16.74	9.8e-09	0.5271	Polr2b
0.03223	9.426	5.274	2.121e-13	0.5205	Fat1
0.03222	3.415	0.5601	3.342e-42	0.5143	H2-Aa
0.03219	9.062	4.296	1.35e-20	0.5234	Haus8
0.03218	38.66	31.83	0.0001121	0.5244	Trim56
0.03217	39.39	31.96	5.612e-05	0.5253	Anapc1
0.03216	25.09	18.48	9.953e-09	0.5282	Diablo
0.03211	17.71	12.2	5.012e-10	0.5255	Tjp2
0.0321	16.3	10.58	2.717e-12	0.5267	Slc36a4
0.0321	24.18	17.72	5.875e-09	0.5281	Prkar2a
0.03209	21.45	15.78	4.191e-08	0.5254	Vps29
0.03204	33.74	26.28	7.665e-07	0.5282	Zmpste24
0.03204	35.93	29.42	5.865e-05	0.5246	Srrt
0.03203	13.93	9.413	3.031e-09	0.5218	Tnfsfm13
0.03202	20.17	13.92	6.07e-11	0.5282	Snapin
0.03202	16.17	10.97	3.074e-10	0.5246	Cox6c
0.03202	25.55	19.51	2.782e-07	0.5261	Tmem165
0.03199	24.18	18.29	2.003e-07	0.5257	Phgdh
0.03196	32.92	26.25	6.703e-06	0.526	Senp5
0.03194	63.21	56.37	0.128	0.5146	Galnt1
0.03191	47.31	39.77	0.001187	0.5226	Cert1
0.0319	28.6	21.39	2.455e-08	0.5291	Rufy1
0.0319	27.91	22.62	5.948e-05	0.5224	Focad
0.03189	50.55	42.89	0.00403	0.521	Aagab
0.03188	15.71	11.44	1.164e-06	0.52	Cep128
0.03177	36.57	30.02	0.0001139	0.5239	Smc6
0.03176	32.1	25.25	1.872e-06	0.5269	Ezh1
0.03175	46.22	37.76	0.0002221	0.5248	Gramd1a
0.03174	32.56	25.57	1.772e-06	0.5271	Eif2ak1
0.03173	43.21	36.13	0.0005418	0.5232	Elavl1
0.03171	42.9	36.56	0.001939	0.5213	Itpk1
0.03169	18.12	12.63	1.11e-09	0.5254	Ifi27
0.03169	58.47	50.33	0.02655	0.518	Ube3a
0.03165	62.2	54.69	0.0999	0.5151	Kdm7a
0.0316	5.92	1.994	3.387e-28	0.5195	Il12rb2
0.0316	63.07	54.53	0.07846	0.5157	Eif4a2
0.0316	29.01	22.45	5.981e-07	0.5269	Tspan31
0.0316	53.83	46.94	0.02259	0.518	Atad2b
0.03159	22.5	15.99	5.234e-10	0.5285	Anxa7
0.03158	51.64	44.65	0.01026	0.5195	Hs2st1
0.03155	60.43	53.43	0.103	0.515	Rbm33
0.03153	75.68	67.83	0.9115	0.5078	Hnrnpk
0.03153	59.88	52.84	0.1104	0.5148	Thada
0.0315	23.5	18.52	2.395e-05	0.5216	Mettl15
0.03148	52.41	45.78	0.01982	0.5182	Chchd3
0.03145	4.554	2.108	3.251e-11	0.5122	Efna5
0.03143	66.58	58.94	0.2951	0.5121	Spag9
0.03142	12.52	7.396	3.178e-14	0.5246	Patl2
0.03138	67.81	60.82	0.3562	0.5115	Tnks2
0.03137	82.01	75.12	1	0.5022	Rnf13
0.03132	40.48	33.11	9.7e-05	0.5249	Rps6kb1
0.0313	27.55	21.55	3.08e-06	0.525	Cep63
0.03129	38.11	30.52	1.334e-05	0.5266	Tox4
0.03129	52.78	44.96	0.004544	0.521	Tulp4
0.03127	16.44	10.92	5.165e-11	0.5256	Afap1
0.03122	34.74	28.71	0.0002118	0.5228	Slc35a3
0.03121	27.5	20.95	2.096e-07	0.5271	Apaf1
0.0312	9.654	5.283	1.318e-14	0.5214	Optn
0.0312	25.5	19.01	4.132e-08	0.5274	Etfa
0.03119	32.56	26.2	1.595e-05	0.5251	Mbtps1
0.03118	34.2	27.5	1.338e-05	0.5257	Elmo2
0.03117	30.51	23.66	7.913e-07	0.5271	Ddx24
0.03116	5.419	1.771	2.666e-27	0.5182	Il2rg
0.03114	65.35	58.04	0.1935	0.5134	Kmt2a
0.03114	5.373	1.733	1.226e-27	0.5182	Fxyd5
0.03114	28.51	22.34	2.383e-06	0.5255	Polr1a
0.03114	72.09	64.38	0.4271	0.511	Fcgr2b
0.03113	17.12	11.66	2.408e-10	0.5254	Ticam2
0.03113	33.97	26.85	3.105e-06	0.527	Ppia
0.03112	51.5	45.11	0.03596	0.5169	Trpm2
0.03111	44.58	37.62	0.001387	0.522	Clock
0.03109	15.53	10.54	7.267e-10	0.5238	Ciao2a
0.03107	12.25	6.973	8.807e-16	0.5253	Pgk1
0.03104	27.69	21.93	8.067e-06	0.5242	Src
0.03103	19.67	13.93	2.649e-09	0.526	Glrp1
0.03102	23.5	18.57	3.441e-05	0.5213	Cdin1
0.03102	45.45	38.04	0.0007551	0.523	Vps26a
0.03102	40.44	34.06	0.0008533	0.5221	Etf1
0.03099	24	17.76	2.986e-08	0.5269	Grsf1
0.03099	18.17	13.21	9.503e-08	0.523	Pccb
0.03099	28.92	23.13	1.472e-05	0.5241	Spin1
0.03094	13.11	8.583	5.773e-10	0.5218	Ankrd28
0.03091	72.22	65.23	0.8063	0.5083	Mknk1
0.0309	19.76	13.94	1.548e-09	0.5263	Dcaf11
0.0309	15.16	10.78	2.639e-07	0.5205	Macrod1
0.0309	19.81	14.99	1.817e-06	0.522	Dmxl2
0.03088	32.33	24.65	7.654e-08	0.5297	Gm44503
0.03088	37.66	31.18	0.0002805	0.523	Csnk1g3
0.03086	10.79	6.722	2.136e-10	0.52	Dynlt2b
0.03083	22.91	17.02	1.077e-07	0.5255	Cbx5
0.03083	40.94	33.78	0.0001944	0.5241	Stk38
0.03081	92.49	89.85	1	0.5033	Chn2
0.0308	36.02	29.3	5.379e-05	0.5246	Rnf10
0.03079	14.62	9.432	1.71e-11	0.5245	Cox6b1
0.03078	4.098	1.543	5.585e-16	0.5128	Nes
0.03078	69.81	62.16	0.4132	0.5111	Taok1
0.03077	27.6	21.69	4.276e-06	0.5247	Ctbs
0.03075	15.76	10.78	1.954e-09	0.5234	Topbp1
0.03074	32.15	25.2	2.049e-06	0.5268	Gga3
0.03069	39.98	33.24	0.0002118	0.5239	Lman1
0.03066	34.7	28.99	0.0003601	0.5221	Med27
0.03066	42.76	35.85	0.0007586	0.5226	Camkk2
0.03062	19.58	13.97	5.273e-09	0.5255	Cetn3
0.03062	21.58	16.27	5.453e-07	0.5238	Paics
0.03061	86.66	80.48	1	0.4983	Tmem135
0.03058	76.59	72.75	1	0.507	Bach2
0.03055	29.23	22.97	3.988e-06	0.5253	Morf4l2
0.03053	23.22	17.43	1.322e-07	0.5256	Glrx3
0.03051	33.65	26.84	7.212e-06	0.5261	4833439L19Rik
0.03049	22.95	17.02	6.04e-08	0.5259	Tor1b
0.03048	47.5	39.56	0.0009264	0.5229	Evi2
0.03048	56.06	48.27	0.01003	0.5199	Arf1
0.03046	44.26	37.83	0.002509	0.5211	AU040320
0.03045	60.52	53.02	0.08458	0.5155	Lrp5
0.03045	25.14	20.02	3.275e-05	0.522	Cstpp1
0.03045	55.6	49.62	0.114	0.5145	Hdac8
0.03044	17.58	12.2	1.903e-09	0.5247	Slc12a7
0.03044	28.05	22.08	6.229e-06	0.5245	Rev1
0.03042	7.468	3.332	6.101e-20	0.5205	Qpct
0.03042	22.5	16.17	2.357e-09	0.5277	Rbm3
0.03042	24.77	18.81	4.071e-07	0.5254	Cep83
0.03042	35.06	28.31	2.889e-05	0.5251	Erp44
0.03039	44.95	38.5	0.004626	0.5202	Itfg1
0.03037	50.23	42.74	0.005266	0.5205	Mga
0.03035	20.26	15.03	1.743e-07	0.5239	Sart1
0.03033	28.19	21.46	2.328e-07	0.5272	Zdhhc3
0.03032	99.5	98.54	1	0.5035	Epb41l2
0.03031	35.7	29.11	7.363e-05	0.5242	Abca3
0.03025	13.66	8.996	8.592e-10	0.5221	Lamc1
0.03024	24.91	19.17	1.158e-06	0.5247	Gnl2
0.03023	62.93	56.02	0.2038	0.5132	Atp9b
0.03022	18.99	13.71	3.157e-08	0.5242	Mthfsl
0.0302	23.63	17.44	3.627e-08	0.5266	Miga1
0.03017	51.96	44.8	0.008584	0.5199	Casd1
0.03016	25.96	20.55	1.191e-05	0.5232	Tex2
0.03014	26.87	21.01	3.254e-06	0.5247	Axin1
0.03014	32.24	26.03	2.72e-05	0.5244	Rfc1
0.03013	47.91	41.53	0.01125	0.519	Iqsec2
0.03011	36.11	29.35	3.826e-05	0.5251	Sacm1l
0.03011	95.54	92.58	1	0.5003	Hpgds
0.03011	43.58	36.47	0.0005053	0.5233	Azin1
0.0301	34.24	27.73	3.988e-05	0.5245	Garre1
0.03006	26.91	20.81	8.302e-07	0.5258	Ap2a1
0.03003	62.02	55.3	0.1289	0.5145	Rb1
0.03001	30.24	24.71	7.542e-05	0.5228	Tsc1
0.03001	62.52	56.77	0.2612	0.5125	Smg6
0.02998	21.54	15.96	1.349e-07	0.5247	Als2
0.02997	24.82	18.56	8.629e-08	0.5265	G6pdx
0.02997	21.9	16.98	8.494e-06	0.5218	Gkap1
0.02994	18.58	13.04	2.885e-09	0.5252	Man2c1
0.02992	39.07	32.21	0.0001799	0.5239	Rmnd5a
0.02991	9.836	5.568	2.076e-13	0.521	Tspo
0.02991	15.26	9.807	4.307e-12	0.5256	Atad3a
0.02991	34.61	27.87	1.993e-05	0.5254	Setx
0.0299	29.78	23.43	4.201e-06	0.5255	Pabpn1
0.02985	19.26	13.91	3.01e-08	0.5243	Pitrm1
0.0298	26.68	20.83	3.112e-06	0.5246	Farsb
0.02978	32.19	25.52	5.716e-06	0.5259	Cln8
0.02976	12.61	7.657	7.208e-13	0.5237	Dipk2a
0.02976	26.68	20.36	3.455e-07	0.5264	Stx12
0.02972	37.57	31.25	0.0002406	0.5232	Bmpr1a
0.02969	23.91	18.48	2.202e-06	0.5238	Tap2
0.02966	25.18	19.01	1.965e-07	0.5261	Knop1
[truncated: 55,011 more rows]

## Sheet: DE-IRM
logFC	pct_1	pct_2	p_val_adj	auc	gene_names
1.517	93.82	45.09	0	0.9006	Rnf213
1.124	91.8	45.84	0	0.8641	Trim30a
1.116	86.39	28.66	0	0.8604	Stat1
1.016	81.95	31.4	0	0.8228	Parp14
0.9376	75.77	13.49	0	0.8352	Sp100
0.9335	79.54	22.96	0	0.8254	Lgals3bp
0.8831	78.38	25.29	0	0.8102	Sdc3
0.8417	77.99	27.6	0	0.7998	Eif2ak2
0.8134	83.88	49.42	6.808e-195	0.7585	H2-D1
0.8056	81.08	45.14	4.298e-204	0.7596	H2-K1
0.7863	71.72	26.92	4.121e-276	0.7622	Herc6
0.777	82.82	45.12	5.951e-189	0.7498	Epsti1
0.7619	57.82	2.025	0	0.7816	Slfn5
0.7266	52.22	2.011	0	0.7535	Ifit2
0.7265	77.41	35.37	2.683e-234	0.7618	Slfn8
0.7205	59.94	7.298	0	0.7712	Nlrc5
0.7155	77.9	35.15	4.529e-248	0.769	Trim30d
0.6861	61.2	17.05	0	0.7397	Ddx60
0.6699	54.25	1.71	0	0.7648	Oasl2
0.658	94.59	72.13	3.496e-146	0.7362	Ly6e
0.6494	99.32	95.23	8.704e-169	0.7562	B2m
0.6332	96.14	90.79	1.381e-86	0.6836	Lrmda
0.629	41.6	22.01	5.389e-62	0.6144	Apoe
0.606	45.08	6.569	0	0.6987	Axl
0.5786	67.08	23.69	6.186e-251	0.7396	H2-T24
0.5763	75.1	41.02	1.245e-150	0.7179	Znfx1
0.5708	57.72	12.57	0	0.7362	Stat2
0.5451	59.46	19	2.942e-245	0.719	Tor3a
0.5422	44.21	1.777	0	0.7134	Ifi204
0.542	67.66	27.71	7.532e-201	0.7252	Adar
0.5305	57.43	18.38	1.803e-231	0.71	Ifih1
0.5213	41.02	0.8953	0	0.7014	Ifit3
0.5086	58.3	16.49	3.809e-271	0.7191	Rigi
0.5067	54.25	7.181	0	0.7396	Xaf1
0.5026	74.71	52.45	1.004e-62	0.6483	Fmnl2
0.491	96.33	85.19	1.042e-78	0.6749	Pik3ap1
0.4758	40.73	3.995	0	0.6856	Gm4951
0.4733	99.32	97.47	2.343e-95	0.6928	Ctsb
0.4674	94.02	82.01	5.893e-86	0.6825	Grn
0.4669	90.15	75.2	2.238e-62	0.6549	AU020206
0.4633	60.81	23.85	4.655e-174	0.6992	Parp9
0.4559	55.31	19.81	1.11e-182	0.6911	Parp12
0.4492	45.95	8.895	0	0.6905	Fgl2
0.4391	37.16	1.426	0	0.6798	Mx1
0.4284	77.41	49.87	1.326e-86	0.6726	Lgals9
0.4258	40.83	1.8	0	0.6961	Usp18
0.4219	46.53	9.907	4.149e-296	0.6882	Slfn9
0.4169	74.9	50.86	6.114e-76	0.6622	Etnk1
0.4086	72.68	50.07	1.764e-67	0.6525	Zup1
0.4047	77.03	51.08	5.845e-76	0.6625	Fcgr1
0.4035	76.54	51.31	1.27e-68	0.6546	Lrch3
0.4004	73.65	48.09	8.005e-74	0.6582	Usp25
0.3965	38.22	2.056	0	0.6814	Ifi209
0.3965	91.12	77.69	3.898e-49	0.6378	Fth1
0.3958	73.26	57.28	1.749e-33	0.6102	Arhgap24
0.3938	57.92	25.39	1.566e-126	0.6731	Dtx3l
0.3929	62.84	30.98	4.557e-109	0.6713	Zc3hav1
0.386	74.03	51.31	4.553e-59	0.6434	Lag3
0.3832	54.83	24.3	1.927e-114	0.662	Gvin-ps7
0.3831	98.55	95.14	5.8e-68	0.6628	Mpeg1
0.3775	37.93	0.9583	0	0.6852	Irf7
0.3714	57.24	27.9	1.949e-98	0.6573	Trim14
0.3706	62.26	35.91	1.364e-75	0.6488	Samhd1
0.3604	57.53	32.06	2.462e-69	0.6378	Lyz2
0.3599	52.7	18.92	1.826e-156	0.6738	H2-T23
0.356	50.29	19.12	7.733e-136	0.6622	Nampt
0.354	89.48	75.54	4.349e-46	0.6333	Ctsz
0.3507	38.13	2.007	0	0.6813	Oas1a
0.3471	42.37	6.915	0	0.6774	Slfn2
0.3403	43.34	10.82	1.537e-218	0.6661	Irgm1
0.3388	69.69	49.02	6.751e-46	0.6253	Ascc3
0.3341	84.94	67.6	4.199e-43	0.6278	Sppl2a
0.3332	44.98	15	1.168e-147	0.6543	H2-Q4
0.3332	58.98	30.64	6.265e-83	0.6487	Trim12a
0.3314	64.29	40.58	4.283e-45	0.6189	Nrp1
0.3305	36.58	6.74	9.804e-263	0.6509	Mx2
0.3297	39	5.696	0	0.6675	Phf11b
0.3279	41.31	11.53	2.085e-173	0.651	Prr5l
0.3269	40.83	8.495	3.344e-253	0.6628	Bst2
0.3232	79.44	62.95	1.912e-33	0.6117	Cd180
0.3222	27.8	0.4814	0	0.6369	Ifi207
0.3213	36.68	6.537	9.004e-276	0.6529	Phf11d
0.3178	86.78	73.27	1.215e-35	0.6171	Ctsl
0.317	29.73	0.4904	0	0.6465	Oas2
0.3138	39.96	12.22	4.546e-143	0.6399	Csf1
0.3105	40.15	10.53	2.529e-183	0.6499	Sass6
0.3104	33.2	0.3959	0	0.6642	Zbp1
0.3089	42.37	10.4	4.032e-205	0.6584	Rtp4
0.3081	62.36	37.78	4.138e-57	0.6312	Apobec3
0.3076	96.24	89.4	1.09e-28	0.606	Ppm1h
0.3075	76.45	54.63	2.633e-43	0.6243	Tor1aip1
0.3064	81.66	69.01	1.481e-14	0.5745	Wwox
0.3041	32.24	7.109	6.163e-181	0.6264	Clec7a
0.2992	82.43	68.49	6.789e-22	0.5913	Cacna1d
0.2983	85.42	72.94	1.141e-27	0.6032	Cd9
0.2983	83.49	69.07	2.369e-26	0.6002	Peli1
0.2976	29.54	5.732	5.064e-197	0.6207	Ccl12
0.2968	84.65	68.04	2.354e-34	0.6142	Npc2
0.2955	39.29	10.41	4.133e-175	0.6456	Pml
0.2933	26.93	7.667	5.699e-105	0.5979	Cd74
0.2933	83.78	70.77	1.862e-23	0.5948	Pvt1
0.2917	71.24	57.64	3.37e-24	0.5938	Apbb2
0.2906	30.12	1.228	0	0.6447	Ifitm3
0.2903	44.59	18.58	2.733e-94	0.6332	ENSMUSG00000121501
0.2902	47.49	27.24	3.121e-47	0.6078	Tiam1
0.2887	52.51	27.44	1.971e-69	0.6312	Irgm2
0.2876	89.58	80.28	1.127e-19	0.5875	Mitf
0.2858	54.25	28.58	1.858e-69	0.633	Tdrd7
0.2851	91.89	84.24	9.76e-18	0.5833	Cadm1
0.285	42.95	13.75	6.274e-143	0.6467	Trim25
0.2838	87.45	75.58	7.31e-28	0.6038	Pabpc1
0.282	38.42	16.67	1.503e-73	0.6125	4930599N23Rik
0.2818	75	59.89	2.77e-28	0.602	Gsap
0.2795	47.2	20.85	3.431e-89	0.6352	Sp110
0.2773	95.95	90.64	2.962e-20	0.5891	Ly86
0.2768	45.66	24.12	1.886e-58	0.615	Cpd
0.2745	93.53	87.56	2.836e-25	0.5995	Abca1
0.2744	83.69	68.95	1.42e-25	0.5987	Ftl1
0.274	57.92	32.15	1.169e-62	0.6311	Shisa5
0.2709	74.61	55.76	2.625e-32	0.6078	Morc3
0.2659	95.95	90.16	2.968e-25	0.5995	Etv6
0.2643	95.17	89.4	3.661e-24	0.5973	Eef1a1
0.2627	38.51	13.37	7.152e-111	0.6272	Gbp9
0.2612	70.27	52	2.493e-28	0.5997	Lyst
0.2585	58.78	35.58	1.69e-43	0.6126	Apobec1
0.2584	99.9	99.23	5.854e-48	0.6369	Ctss
0.2575	58.88	37.69	1.134e-40	0.6106	Cd63
0.2569	90.73	80.29	3.245e-19	0.5865	Cmip
0.2557	45.37	19.42	2.465e-88	0.6311	Uba7
0.255	86.87	76.29	1.741e-22	0.5933	Timp2
0.2544	27.32	0.8953	0	0.6323	Helz2
0.2527	94.79	86.55	7.709e-27	0.6025	Capza2
0.2525	62.74	40.6	2.431e-40	0.6124	Ankle2
0.2519	56.85	37.15	5.153e-33	0.5993	Rufy3
0.2512	67.76	46.22	3.638e-35	0.6084	Larp1
0.251	37.45	10.51	9.091e-151	0.6352	Trim34a
0.2509	94.88	89.68	1.328e-17	0.5831	Prkcb
0.2504	51.93	29.44	5.138e-53	0.6172	Trafd1
0.2491	59.85	43.56	9.946e-23	0.5858	Cd83
0.2469	45.75	20.81	6.35e-76	0.6245	Cmtr1
0.2454	74.42	59.67	9.56e-22	0.5894	Slc15a3
0.2447	62.64	40.61	2.784e-39	0.6109	Chmp4b
0.2439	99.13	97.29	4.68e-30	0.6085	C1qa
0.2433	84.17	69.36	5.09e-22	0.5917	Sema4d
0.242	78.28	61.46	1.27e-23	0.5936	Dnajc13
0.2411	40.54	16.83	2.139e-82	0.6197	Trim12c
0.2409	97.88	93.93	2.897e-26	0.6015	C1qc
0.2396	68.53	52.94	6.679e-24	0.5919	Vps54
0.2367	67.37	46.04	8.917e-34	0.6061	Tapbp
0.2362	99.61	98.61	2.256e-27	0.6036	Ctsd
0.2356	90.54	82.69	6.559e-22	0.5925	Lamp1
0.2353	52.41	31.15	1.055e-42	0.6071	Daam1
0.2353	33.4	16.91	1.394e-41	0.5847	Mllt3
0.2336	98.94	96.76	6.836e-26	0.6007	C1qb
0.2335	59.36	42.65	2.483e-26	0.5919	Hif1a
0.233	54.15	35.11	1.179e-32	0.5971	Tbc1d8
0.2329	64.29	44.64	1.167e-31	0.602	Luc7l3
0.2326	83.2	70.67	1.894e-15	0.5769	Acer3
0.2318	18.53	0.9313	0	0.5882	Cybb
0.2318	24.23	3.415	7.853e-227	0.6049	A330040F15Rik
0.2311	30.31	4.054	1.999e-298	0.6313	Dhx58
0.2302	87.64	74.94	1.646e-13	0.5723	Cd86
0.23	59.85	40.37	2.688e-31	0.5989	Gm12185
0.2296	20.37	0.2835	0	0.6005	Rsad2
0.2261	80.5	66.11	2.087e-18	0.5834	Hck
0.2258	84.36	70.75	6.018e-12	0.5676	Vti1a
0.2256	66.51	48.17	9.885e-26	0.5935	Cd47
0.2252	66.31	49.16	2.616e-23	0.5894	Sgk3
0.2249	74.71	58.94	1.01e-21	0.5892	Myo9b
0.2245	98.84	95.21	2.401e-21	0.5915	Dst
0.224	58.59	45.78	8.29e-16	0.5724	Arid5b
0.2227	96.04	90.75	7.731e-14	0.5737	Diaph2
0.2225	99.42	97	8.894e-25	0.5986	Psap
0.2218	16.12	0.4634	0	0.5784	Ifi213
0.2213	93.82	86.22	9.076e-15	0.5761	Tns3
0.2206	64	47.47	2.919e-20	0.5827	Rassf3
0.2204	71.91	54.84	5.108e-21	0.5867	Tpd52
0.219	99.03	97.04	1.427e-14	0.5756	Tmcc3
0.2187	39.58	23.55	2.238e-30	0.582	Myo1e
0.2178	38.03	17.18	1.604e-62	0.6049	Ly9
0.2169	82.05	69.18	2.669e-14	0.5739	Snd1
0.2166	44.79	21.4	3.583e-62	0.6138	Psme1
0.2164	89.58	81.62	4.36e-14	0.5741	Sipa1l2
0.2162	90.64	80.87	2.3e-17	0.5823	Lamp2
0.2153	41.31	20.49	2.314e-52	0.6026	ENSMUSG00000120992
0.214	93.73	86.74	1.977e-13	0.5725	Atp8a1
0.2125	54.44	35.17	1.738e-33	0.5984	Tmem184b
0.2087	27.41	8.31	8.635e-96	0.5967	Itgax
0.2086	24.13	1.354	0	0.614	Ifi27l2a
0.2082	75.68	61.39	2.691e-16	0.5778	Dpy19l4
0.2082	91.02	82.27	6.746e-12	0.5681	Zfand3
0.2067	48.65	31.72	2.914e-25	0.5828	Cers6
0.2063	59.94	45.26	5.198e-19	0.5792	Abcg1
0.206	64	44.75	4.094e-27	0.5944	Akr1a1
0.2057	81.27	68.74	4.715e-15	0.5758	Dync1h1
0.2053	70.85	54.87	1.316e-19	0.5838	Usp12
0.2047	85.52	73.37	2.26e-14	0.5744	Scarb2
0.2041	37.26	15.77	1.219e-69	0.6071	1600014C10Rik
0.2004	55.89	37.28	4.106e-28	0.5917	Ilrun
0.2002	66.6	50.03	8.243e-20	0.5827	Synj1
0.1991	23.17	1.039	0	0.6107	Isg15
0.1991	60.42	45.68	9.122e-17	0.5746	Galnt7
0.199	71.24	55	8.198e-19	0.5821	Atp6v0a2
0.1973	55.02	36.96	2.083e-27	0.5903	Tor1aip2
0.1963	92.37	81.34	2.761e-12	0.5692	Actr2
0.1962	62.16	53.53	2.316e-06	0.5471	Atp8a2
0.1959	52.8	33.99	2.06e-30	0.5928	9930111J21Rik2
0.1957	62.55	46.22	2.299e-19	0.5804	Dennd1b
0.1948	99.42	97.78	6.962e-27	0.6027	Itm2b
0.1945	65.15	50.77	8.141e-15	0.5718	Bcl2l1
0.1942	91.51	84.25	2.466e-10	0.5635	Skap2
0.194	83.4	71.46	5.839e-13	0.5705	Ctsc
0.1939	88.61	78.97	3.07e-11	0.5661	Myo1f
0.1937	47.39	28.14	3.144e-35	0.5941	Tlr3
0.1934	30.89	10.47	9.278e-89	0.6026	Tent4a
0.1915	37.16	21.56	2.065e-29	0.5782	Itpr1
0.1912	91.31	83.99	3.086e-10	0.5632	Cux1
0.1903	50.97	33.07	3.911e-28	0.5885	Aplp2
0.1902	24.32	4.243	2.296e-177	0.6005	Trim30b
0.1901	51.16	34.95	2.122e-20	0.5766	Aig1
0.1896	59.36	45.87	5.681e-13	0.5657	Gatm
0.1892	34.56	16.59	1.245e-48	0.591	Cxcl16
0.188	55.69	40.92	3.399e-16	0.5713	Bbx
0.1878	30.79	10.34	4.437e-87	0.6011	Nceh1
0.1876	56.66	38.19	1.716e-26	0.5896	Fnbp4
0.1869	96.72	91.94	6.226e-09	0.5591	Gab2
0.1858	67.95	53.5	1.703e-14	0.5717	Tgfa
0.185	77.8	64.62	2.694e-11	0.5651	Fndc3b
0.1848	85.62	74.16	4.94e-12	0.5682	Hexa
0.1845	96.24	90.4	8.873e-14	0.5735	Gns
0.1841	59.17	41.56	3.609e-21	0.5819	Rbpj
0.1837	23.94	8.472	4.784e-62	0.5779	Myo5a
0.1831	63.03	46.42	7.696e-19	0.5794	Xrn1
0.1829	86	77	4.972e-08	0.5556	Lhfpl2
0.1828	84.36	71.26	3.265e-09	0.5593	Map4
0.1824	64.86	47.66	3.335e-18	0.5785	Ranbp2
0.182	42.57	24.31	2.888e-33	0.5869	Uty
0.1818	60.04	46.66	2.848e-11	0.5614	Akt3
0.1805	79.44	68.63	5.01e-10	0.5617	Abr
0.1804	84.17	71.68	4.799e-12	0.568	Ctsh
0.1796	83.01	73.17	1.314e-10	0.5639	Gnas
0.1794	84.17	74.41	3.345e-10	0.5627	Dnmt3a
0.1793	35.62	16.29	1.758e-53	0.5949	Cd52
0.1792	66.99	51.27	4.315e-16	0.5749	Smchd1
0.1777	80.6	68.69	1.63e-10	0.5632	Tlr7
0.1773	61.39	43.25	3.181e-20	0.5809	Xrn2
0.1773	83.2	72.19	1.16e-11	0.5669	P4ha1
0.1772	24.13	3.815	3.57e-196	0.6015	Gm5431
0.1769	76.35	63.24	8.753e-11	0.5635	Aim2
0.1768	24.32	8.504	1.456e-63	0.579	Cpq
0.1767	66.8	52.59	3.093e-14	0.5708	Pign
0.1767	85.33	76.19	7.667e-10	0.5617	Serpine2
0.1763	81.95	71.29	3.571e-09	0.5592	Arhgap25
0.1763	90.25	82.04	1.138e-08	0.558	Chd7
0.1761	52.22	35.12	4.28e-23	0.5817	Nsmaf
0.1759	83.11	73.13	1.819e-09	0.5603	Nfkb1
0.1754	83.88	74.07	2.461e-09	0.5599	Cd84
0.1753	28.96	9.106	1.114e-91	0.5984	Ifi35
0.1753	28.09	10.03	7.058e-73	0.591	Mthfr
0.175	99.23	96.54	1.519e-17	0.583	Rrbp1
0.1743	75.58	59.47	8.055e-12	0.5659	Lrrfip1
0.1742	77.9	64.22	3.151e-11	0.5649	Taok3
0.1737	80.89	70.42	3.951e-09	0.559	Ankrd17
0.1734	53.76	38.89	6.021e-18	0.5741	Sorl1
0.1734	35.81	24.2	8.385e-16	0.5596	Rad51b
0.1732	42.47	26.64	6.234e-26	0.5792	Tbc1d1
0.1727	67.37	55.55	1.453e-09	0.5585	Fnip2
0.1725	72.01	57.8	2.775e-13	0.5696	Ankfy1
0.1721	69.31	55.58	5.159e-12	0.5657	Susd6
0.1714	41.8	26.17	2.058e-25	0.5779	Tank
0.171	47.59	30.41	8.926e-26	0.5825	Rasa4
0.1706	85.42	79.49	2.112e-07	0.5534	Ccnd3
0.1705	57.05	40.29	1.427e-20	0.5801	Stx16
0.1704	83.4	71.67	4.566e-08	0.5555	Uvrag
0.1692	35.14	17.5	1.164e-42	0.5871	Casp4
0.1681	80.6	70.26	1.025e-10	0.564	Ctsa
0.168	94.88	88.29	2.191e-07	0.5535	Plek
0.1676	86.87	75.76	8.539e-08	0.5547	Il10ra
0.1673	78.86	66.88	2.81e-09	0.5592	Cmklr1
0.167	98.94	98.49	3.081e-14	0.5748	mt-Rnr1
0.1668	89.38	79.55	4.856e-07	0.5521	Rab8b
0.1666	71.24	57.51	8.595e-11	0.5626	Pfkfb3
0.1665	37.07	21.84	5.214e-28	0.5766	Tlr2
0.166	16.41	0.1215	0	0.5815	Gm6545
0.1658	92.76	85.21	3.722e-08	0.5563	Csf3r
0.1653	21.33	2.763	8.806e-214	0.5929	Cst7
0.1653	36.49	19.93	1.509e-33	0.5811	Gnptab
0.1651	17.57	0.162	0	0.587	Ifit1
0.1651	30.12	9.966	6.68e-87	0.5994	Ogfr
0.1646	72.39	59.1	3.27e-10	0.5611	Nsd3
0.1638	98.94	97.21	2.239e-12	0.5697	Lyn
0.1637	21.14	7.973	7.755e-48	0.5663	Xylt1
0.1635	50.19	32.5	3.259e-24	0.5817	Zcchc2
0.1635	80.41	67.76	1.943e-09	0.5598	Ap3b1
0.1629	87.07	75.51	2.322e-07	0.5531	Eif4g3
0.1623	35.23	16.24	7.416e-51	0.5924	Irf9
0.1612	50.29	32.45	6.302e-24	0.5812	P2rx4
0.161	75.68	60.8	1.472e-10	0.5625	Senp2
0.1609	69.21	56.01	1.702e-11	0.5643	Taf15
0.1604	57.24	41.56	1.943e-16	0.5722	Coro7
0.1603	18.24	2.853	1.191e-149	0.5772	Atp10a
0.1602	94.11	86.09	3.254e-07	0.5529	Msn
0.1598	61.58	46.27	1.944e-14	0.5694	Naip2
0.1595	20.46	3.316	1.616e-159	0.5854	Trim30c
0.1591	66.7	50.05	1.027e-14	0.5713	Ubr4
0.159	42.57	28.45	7.262e-19	0.569	Anapc15
0.159	69.79	54.95	2.164e-11	0.5638	Elf1
0.1588	83.49	73.06	7.018e-09	0.5583	Eef2
0.1585	20.75	4.346	2.749e-119	0.582	Gvin3
0.1584	61.2	48.32	1.014e-10	0.5603	Aopep
0.1582	16.22	0.8863	0	0.5767	Samd9l
0.158	17.08	1.651	6.018e-224	0.5772	C4b
0.1578	95.66	89.86	9.431e-07	0.5511	Ptprc
0.1577	60.62	45.61	4.009e-15	0.5708	Gm2a
0.1577	59.17	44.23	1.924e-14	0.5687	Vps13c
0.1577	83.01	72.63	1.449e-07	0.5537	Irf2
0.1572	72.3	58.01	1.183e-10	0.5623	Calm1
0.1567	88.42	81.13	9.445e-07	0.551	Arid1b
0.1565	93.44	83.78	8.09e-05	0.5426	Rptor
0.1563	87.84	76.22	7.195e-07	0.5513	Efhd2
0.156	15.83	0.2745	0	0.5778	Ifi206
0.156	72.1	58.95	9.061e-11	0.5628	Sdcbp
0.1559	40.06	22.43	2.746e-33	0.5845	Nfxl1
0.1559	68.63	54.28	1.466e-11	0.5642	Cd68
0.1556	16.31	0.126	0	0.581	Ifit3b
0.1555	23.65	7.406	1.159e-74	0.5809	Cd274
0.1553	22.59	3.437	1.441e-189	0.5953	Ube2l6
0.155	77.9	65.43	2.748e-09	0.5591	Stx7
0.1543	33.98	16.59	6.37e-43	0.5855	Marchf5
0.1536	48.26	30.52	1.421e-26	0.5839	Naip6
0.1535	48.75	31.72	1.679e-22	0.5781	Trim56
0.1535	48.55	33.23	4.608e-19	0.5729	Sh3bp2
0.1535	56.56	42.89	8.786e-13	0.5641	Gng12
0.1535	91.89	84.37	6.351e-05	0.5431	Exoc4
0.1532	28.09	16.48	4.756e-20	0.558	Colec12
0.1528	74.32	61.74	9.507e-09	0.5569	Fndc3a
0.1525	85.42	74.59	6.1e-06	0.5474	Wdfy4
0.1524	30.41	12.87	1.093e-52	0.5856	Il15ra
0.1523	66.41	51.76	2.392e-11	0.563	Spop
0.152	85.23	75.64	3.223e-06	0.5486	Extl3
0.1516	17.47	0.243	0	0.5862	Oas1g
0.1509	44.5	27.07	1.549e-27	0.5821	Icosl
0.1508	63.51	48.16	3.978e-13	0.5668	Lacc1
0.1503	96.72	91.34	2.992e-07	0.5531	Cd81
0.1502	58.98	45.52	7.913e-12	0.5626	Abl2
0.15	15.73	0.06749	0	0.5783	Oasl1
0.1496	25.19	8.445	1.944e-70	0.5831	Igtp
0.1495	9.363	0.4679	1.051e-198	0.5446	Cxcl10
0.1494	26.54	7.851	4.217e-91	0.592	Tap1
0.1492	17.08	2.308	1.165e-163	0.5741	Gbp2
0.1491	55.5	38.81	7.21e-18	0.5739	Hmox2
0.1491	44.11	29.74	2.307e-17	0.5672	Npnt
0.1487	71.24	57.79	7.278e-11	0.5629	Sgpl1
0.1484	55.31	42.36	1.593e-11	0.5607	Traf3
0.1483	53.47	38.73	1.954e-15	0.5686	Ttc39b
0.1479	69.59	55.48	3.851e-10	0.5603	Slc6a6
0.1478	45.75	31.19	6.212e-16	0.5654	Niban1
0.1473	81.95	71.96	3.658e-06	0.5482	Ptk2b
0.1468	67.57	51.9	3.225e-12	0.5654	Sat1
0.1468	83.98	74.98	3.455e-06	0.5485	Hspa5
0.1463	79.63	67.36	2.339e-08	0.5562	Tyrobp
0.1461	83.98	72.34	6.177e-06	0.5472	Evl
0.1459	63.03	51.66	6.675e-09	0.5557	Rapgef2
0.1459	84.17	75.16	1.516e-07	0.5538	Irf8
0.1455	34.75	16.98	5.524e-42	0.5854	Nectin4
0.1452	77.12	62.67	3.672e-09	0.5583	Rpl4
0.1448	50.97	35.81	4.383e-17	0.5706	Plekha1
0.1445	65.54	51.41	1.282e-10	0.5608	Tmem104
0.1444	32.82	20.75	4.62e-18	0.5603	Rftn1
0.1437	44.98	29.69	1.175e-20	0.5733	Pld3
0.1437	54.25	38.63	8.141e-15	0.5672	Ncoa1
0.1433	71.53	59.62	8.328e-08	0.5534	Tns1
0.1427	11.78	0.1305	0	0.5583	Iigp1
0.1427	37.07	23.36	4.638e-20	0.5664	Cd300lf
0.1426	44.11	26.52	7.1e-26	0.579	Tent5a
0.1425	86.29	76.52	6.613e-05	0.5428	Blnk
0.1424	57.92	42.18	2.326e-14	0.5677	Tasor2
0.1417	55.6	41.1	1.036e-13	0.5657	Resf1
0.1406	50.77	36.22	3.837e-15	0.5667	Pde4dip
0.1404	86.97	79.2	3.454e-05	0.5442	Tbc1d22a
0.1399	88.51	81.18	1.151e-05	0.5464	Calr
0.1396	73.17	62.4	5.414e-06	0.5467	Lpp
0.1395	31.47	16.77	7.925e-31	0.5726	Nod1
0.1394	87.55	78.21	9.026e-05	0.5421	Wipf1
0.1393	25.1	8	4.165e-76	0.5845	Parp10
0.1391	44.98	29.29	1.027e-19	0.5713	Abcb1b
0.1391	85.14	77.32	7.317e-05	0.5426	Gna12
0.139	78.47	70.41	4.963e-06	0.5475	Pnpla7
0.1389	68.92	54.85	4.651e-09	0.5568	Setd3
0.1387	19.02	5.084	6.105e-77	0.5696	Vcam1
0.1387	57.34	45.07	7.787e-09	0.5538	Mthfs
0.1387	98.46	95.76	3.282e-06	0.5489	Dock2
0.1385	28.28	16.02	4.929e-22	0.5602	St7
0.1385	96.53	92.86	0.0004607	0.5386	Runx1
0.1381	49.23	35.22	4.452e-15	0.566	Usp35
0.138	46.43	31.48	5.428e-18	0.5697	Jak2
0.1379	35.62	17.58	3.336e-40	0.5847	Psme2
0.1378	85.14	75.82	1.056e-06	0.5506	Slc29a3
0.1376	39.29	23.54	4.268e-25	0.5746	Dcp2
0.1376	55.69	41.5	6.916e-12	0.5613	Eya4
0.1374	20.85	4.648	2.718e-109	0.5806	Clec2d
0.1374	78.67	68.72	8.09e-05	0.5419	Gtdc1
0.1363	20.66	6.758	2.604e-60	0.5695	Tpst1
0.1361	79.15	66.49	1.431e-06	0.5495	Prkcd
0.136	49.52	33.16	3.235e-19	0.5732	Atp6v1b2
0.1347	80.31	68.28	6.14e-06	0.547	Huwe1
0.1343	69.69	57.04	1.104e-08	0.556	Ptma
0.134	54.92	42.37	3.278e-11	0.5598	Rilpl1
0.1336	22.1	7.941	1.11e-53	0.5703	Gbp5
0.1332	78.96	68.46	4.781e-06	0.5475	Cotl1
0.1327	95.66	90.34	3.132e-06	0.549	Unc93b1
0.1326	33.01	16.92	6.7e-35	0.5777	Sp140
0.1326	44.11	28.68	2.347e-19	0.5701	Dop1b
0.1323	40.93	24.68	5.441e-25	0.5757	Slc12a9
0.1323	60.33	52.53	0.000807	0.5353	Immp2l
0.132	59.94	44.65	1.15e-12	0.5645	Nucb1
0.1319	41.41	26.45	8.158e-20	0.569	Prune2
0.1317	26.25	17.59	2.75e-10	0.5425	Arhgap15
0.1313	43.34	27.25	2.47e-22	0.574	Max
0.1312	94.4	88.92	1.854e-05	0.5456	Tgfbr2
0.1312	93.15	87.63	6.045e-05	0.5432	Pdia3
0.1311	76.25	63.76	2.299e-07	0.5523	Adam17
0.131	34.27	18.45	1.738e-30	0.5751	Ms4a6b
0.131	53.09	37.97	1.379e-14	0.5664	N4bp1
0.1308	15.64	0.5804	0	0.5754	Phf11a
0.1299	30.02	19.5	2.196e-14	0.5525	Hivep2
0.1298	57.92	42.8	4.353e-13	0.5649	Tcirg1
0.1297	48.55	33.62	6.675e-16	0.5669	Dclre1c
0.1296	29.05	16.25	2.104e-24	0.5637	Gpr84
0.1296	88.32	81.68	0.0009631	0.5368	Camk2d
0.1295	67.76	54.84	2.246e-07	0.5511	Mlxip
0.1294	66.6	52.59	5.148e-09	0.5562	Thrap3
0.1293	71.91	60.11	8.489e-07	0.5497	Ncl
0.1289	63.22	51.82	5.972e-07	0.549	Nsmce2
0.1285	55.98	41.92	4.465e-12	0.562	Slc38a10
0.1283	43.73	27.59	1.256e-21	0.5732	Lap3
0.1282	22.2	6.168	6.629e-84	0.5794	Gvin1
0.1282	28.67	13.33	2.958e-39	0.5748	Mov10
0.1282	59.65	45.66	1.41e-10	0.5592	Trak1
0.1281	49.61	36.87	2.963e-12	0.5603	Pkm
0.128	67.57	54.93	6.41e-08	0.5531	Tut7
0.1279	22.01	6.866	7.05e-69	0.575	Cd22
0.1276	16.7	4.067	4.794e-77	0.5631	Rai14
0.1275	72.39	57.45	1.693e-07	0.552	Kpna4
0.1273	93.15	87.38	4.782e-05	0.5437	Myh9
0.1272	57.43	45.84	1.21e-08	0.5534	Ppard
0.127	72.01	60.25	1.971e-06	0.5483	Nktr
0.1269	58.11	44.2	6.808e-11	0.5596	Hvcn1
0.1268	51.35	36.96	1.394e-12	0.5611	Dtnbp1
0.1268	83.88	72.66	0.0001384	0.5409	Ddx17
0.1267	40.15	23.57	5.168e-26	0.576	Ddx24
0.1266	80.21	68.08	8.351e-06	0.5464	Pld4
0.1264	35.81	19.5	1.662e-30	0.5767	Rnf114
0.1264	39.48	23.73	1.617e-23	0.5724	A930015D03Rik
0.1264	50.1	37.74	8.687e-11	0.5569	Mapkapk2
0.1264	78.38	69.14	6.1e-06	0.5471	Trip12
0.1262	55.69	40.28	2.78e-13	0.5643	Rpl23
0.1253	87.26	80.56	0.000273	0.5397	Asph
0.1249	22.3	9.547	1.202e-37	0.5635	Pcgf5
0.1247	67.08	53.48	4.891e-08	0.5532	Tpr
0.1246	48.26	34.83	1.441e-12	0.56	Bri3
0.1243	60.81	50	8.223e-07	0.5481	Nedd4l
0.1242	66.7	54.16	9.363e-08	0.5524	Fbrsl1
0.1238	77.99	66.22	8.196e-07	0.5504	Fcer1g
0.1237	77.03	66.92	3.315e-05	0.5437	Dpysl2
0.1236	30.79	16.45	1.886e-29	0.5705	Naa25
0.1236	46.24	30.99	1.112e-16	0.5668	Aldoa - ENSMUSG00000030695
0.1236	70.95	58.16	3.444e-07	0.551	Kmt2a
0.1231	76.54	66.33	3.035e-05	0.5438	Clint1
0.1229	55.02	41.41	7.104e-11	0.5586	Baz1a
0.1226	55.12	40.96	8.902e-12	0.5608	Zfp106
0.1225	49.03	34.02	2.484e-15	0.5659	Serp1
0.1225	57.72	43.12	4.537e-11	0.5597	mt-Co1
0.1225	75.97	62.91	7.816e-07	0.5502	Itm2c
0.1224	72.2	60.85	2.662e-05	0.5436	Tcf20
0.1223	70.46	60.83	0.0001064	0.5407	Fkbp5
0.1221	71.24	58.16	1.692e-07	0.5521	Actr3
0.122	27.8	12.32	1.955e-41	0.5744	Gm46224
0.122	33.98	18.3	3.623e-30	0.5744	Tap2
0.122	54.05	39.12	2.213e-13	0.5641	Rps8
0.1218	22.39	8.301	1.429e-50	0.5695	Ms4a6c
0.1217	62.16	49.31	2.194e-08	0.5535	C3ar1
0.1213	74.23	62.51	0.0001823	0.5397	Fars2
0.1212	38.03	24.55	1.657e-17	0.5632	Bcl2a1b
0.1211	57.14	45.18	2.182e-08	0.5524	Trpm2
0.121	86.1	78.13	0.002337	0.5345	Fam172a
0.1206	20.75	6.645	6.539e-62	0.57	Gvin2
0.1206	64.38	51.26	6.355e-08	0.5524	Cnot6l
0.1205	15.73	2.902	5.107e-105	0.5642	Tnfsf10
0.1205	34.27	18.82	3.903e-27	0.5714	Ddx3y
0.1204	45.56	33.51	1.25e-10	0.5545	Il15
0.1204	66.89	55.4	9.319e-07	0.5489	Cep350
0.12	75.87	66.64	0.000224	0.5396	Slc1a3
0.1199	60.52	47.92	1.2e-08	0.554	Atp6v1c1
0.1198	47.01	34.02	1.978e-11	0.5568	Spata5
0.1193	72.3	60.34	1.159e-06	0.5492	Ppt1
0.1192	29.44	14.87	1.383e-31	0.5701	Isoc1
0.119	14.58	2.907	8.245e-89	0.5586	Gm49339
0.1189	43.73	30.39	3.081e-14	0.5613	Il18
0.1189	38.71	26.49	1.112e-13	0.5573	Coro2a
0.1189	43.24	31.28	8.012e-12	0.5563	Icam1
0.1188	68.05	56.85	2.404e-05	0.5433	Phip
0.1186	69.5	58.17	1.312e-05	0.5446	Nlrp1b
0.1184	70.95	59.81	5.538e-05	0.5421	Lrrc8d
0.1183	52.99	39.71	1.61e-10	0.557	Evi2
0.118	61.78	50.84	1.103e-06	0.5478	Dgkz
0.1179	78.76	68.09	0.0001052	0.5413	Cflar
0.1178	84.75	74.22	0.0003268	0.5391	Prrc2c
0.1174	90.54	83	0.006548	0.5318	Mgat5
0.1173	50.1	36.56	5.34e-12	0.5595	Itpk1
0.1171	69.88	56.76	4.031e-07	0.5505	Ewsr1
0.1169	60.91	46.15	2.153e-10	0.5588	Ybx1
0.1167	38.71	23.28	1.474e-22	0.5704	Rtcb
0.1166	47.97	33.46	3.811e-14	0.563	Dek
0.1166	66.41	54.86	9.635e-06	0.5447	Prkch
0.1164	54.73	41.36	3.875e-10	0.5565	Nup98
0.1158	70.75	60.16	2.678e-05	0.5435	Cnot4
0.1158	72.39	63.28	6.705e-05	0.542	Fnip1
0.1154	54.54	40.97	1.786e-10	0.5573	Snx10
0.1154	98.17	94.08	0.001628	0.5356	Lpcat2
0.1151	50.48	35.85	4.812e-13	0.5617	Camkk2
0.115	85.04	74.45	0.001172	0.5361	Rbm25
0.1149	73.75	62.64	2.1e-05	0.5442	Usp9x
0.1148	15.35	2.025	9.943e-149	0.5665	Oas1b
0.1148	14.09	2.371	4.353e-105	0.5587	Lilrb4a
0.1146	35.33	21.66	1.611e-19	0.5637	Birc3
0.1146	63.32	51.39	3.442e-07	0.5498	Wls
0.1144	11.87	0.05849	0	0.5591	Ifi211
0.1143	76.83	65.47	0.0002111	0.5396	Rbm47
0.1141	46.53	32.69	9.337e-14	0.5616	Rplp0
0.114	48.84	34.86	7.963e-13	0.5607	Atp6v1a
0.114	60.23	48.15	5.64e-08	0.5519	Gls
0.114	64.86	52.14	4.859e-07	0.5494	Eif3a
0.1139	66.51	55.57	0.0001232	0.5398	Zfp407
0.1138	36.1	24.68	6.955e-13	0.5542	Gbp7
0.1135	60.23	45.8	4.053e-10	0.5579	Tgoln1
0.1134	28.67	15.59	4.702e-25	0.5635	Map3k8
0.1132	44.31	30.31	1.725e-14	0.5618	Plekhm2
0.1131	39.19	27.94	3.958e-10	0.5501	Ank
0.1127	19.98	10.02	5.322e-23	0.5504	Carmil1
0.1124	52.03	39.8	9.255e-09	0.5519	Tmem243
0.1124	76.64	65.34	6.874e-05	0.5422	Papola
0.1122	18.05	3.572	4.228e-109	0.5718	A930037H05Rik
0.1122	47.49	33.2	3.316e-13	0.5607	D5Ertd579e
0.1122	55.02	44.56	1.204e-07	0.5498	Rassf4
0.1121	48.75	36.63	6.849e-10	0.554	Rab27a
0.1121	60.04	47.09	2.278e-08	0.5529	Gusb
0.1119	62.84	49.84	1.082e-07	0.5513	Zc3h7a
0.1117	100	99.92	0.001924	0.5352	Cdk8
0.1116	68.44	55.92	1.671e-05	0.5439	Rsrc1
0.1113	12.26	0.2745	0	0.56	Cmpk2
0.1113	58.69	47.51	1.935e-06	0.5462	Sik3
0.1112	50.58	36.87	1.384e-11	0.5586	Rnpep
0.1112	70.75	57.84	3.808e-06	0.5469	Mob1a
0.1111	37.45	24.25	1.014e-16	0.5614	Cd48
0.1108	24.23	10.02	9.531e-43	0.5692	Atrip
0.1107	19.69	5.359	4.521e-76	0.5709	H2-T22
0.1107	69.88	57.66	4.215e-06	0.5467	Ptms
0.1099	19.4	7.239	3.419e-43	0.5604	Clic4
0.1098	54.44	40.5	2.208e-10	0.5569	Eif5b
0.1096	46.04	34.23	1.213e-09	0.5522	Neat1
0.1095	58.88	45.21	1.663e-08	0.5528	Il21r
0.1094	20.56	13.42	2.014e-09	0.5363	Marchf3
0.1094	54.05	41.58	5.491e-08	0.5501	Iqsec2
0.1094	64.09	50.9	6.227e-08	0.5523	Cyba
0.1094	66.8	54.62	9.508e-07	0.5487	Lmo2
0.1092	41.22	29.25	1.135e-10	0.5523	Hpcal1
0.1089	47.59	35.8	1.971e-09	0.5523	Rnf19b
0.1089	75.77	64.08	4.72e-05	0.5428	Itgb2
0.1087	99.71	99.28	3.231e-06	0.5489	mt-Rnr2
0.1083	65.25	52.73	9.552e-06	0.5444	Suclg2
0.1081	48.26	35.55	2.005e-11	0.5575	Csf2rb
0.1078	43.15	29.92	1.385e-13	0.5595	Uhrf1bp1
0.1077	12.45	0.4229	0	0.5602	Siglec1
0.1076	55.89	41.65	2.565e-10	0.5571	BC005537
0.1075	70.46	57.59	3.209e-06	0.5471	Aif1
0.1074	38.13	24.76	1.09e-16	0.5619	Zfyve26
0.1073	59.07	46.18	1.661e-07	0.5498	Rsbn1l
0.1072	25.77	15.39	2.052e-16	0.551	Acaca
0.107	53.38	41.4	2.576e-08	0.5511	Tent5c
0.107	87.64	79.99	0.002706	0.5342	Man2b1
0.1068	64.38	51.8	1.123e-06	0.548	Arfgef1
0.1066	44.69	30.81	3.493e-14	0.5614	Naip5
0.1064	45.17	32.37	4.974e-11	0.555	Zfp516
0.1062	14.58	2.488	3.215e-106	0.5604	Cd72
0.1062	18.92	5.732	1.477e-61	0.5654	Dck
0.1062	35.33	21.87	8.615e-19	0.5627	Src
0.1061	56.66	45.87	1.752e-06	0.546	Cept1
0.1061	74.61	64.01	0.001097	0.5358	Cdkal1
0.106	33.78	20.04	1.838e-20	0.5634	Hebp1
0.106	48.65	35.68	7.434e-11	0.5562	Evi2a
0.1058	64.77	51.82	3.228e-07	0.55	Os9
0.1058	66.41	54	7.383e-06	0.5451	Fbxw11
0.1055	55.21	41.3	1.103e-09	0.5552	Dnajb6
0.1055	90.64	83.14	0.02036	0.5283	Plcg2
0.1053	50.39	37.69	9.487e-10	0.554	Smg7
0.1052	21.81	8.495	4.233e-44	0.5655	H2-M3
0.1051	37.45	23.63	5.679e-18	0.5631	Azi2
0.105	31.08	20.12	2.129e-13	0.5513	Dapk1
0.1048	62.36	51.68	2.947e-05	0.5422	Osbpl8
0.1048	76.74	66.52	0.0002797	0.5391	Hk2
0.1048	73.65	64.75	0.001028	0.536	Znrf2
0.1048	95.27	91.8	0.002033	0.535	Fyb
0.1048	71.24	63.74	0.01705	0.5284	Ext1
0.1047	49.9	36.23	5.314e-11	0.5568	Gatad2a
0.1046	12.45	0.2565	0	0.561	Tgtp2
0.1046	37.16	24.8	5.338e-14	0.5566	Ppfia4
0.1046	65.73	53.27	8.421e-06	0.5447	Psme4
0.1046	35.23	27.57	3.148e-05	0.5353	Prkg1
0.1045	42.18	28.47	6.569e-14	0.5593	Man2a1
0.1045	58.69	44.76	1.935e-08	0.5525	Tgs1
0.1045	65.73	53.64	1.812e-05	0.5434	Kdm2a
0.1042	61.58	50.09	1.133e-06	0.5476	Atp1b3
0.1041	46.81	32.23	4.205e-13	0.5599	Rpl32
0.1041	92.37	87.22	0.0067	0.5318	Gm19951
0.104	26.06	14.75	2.788e-19	0.5544	Lrguk
0.104	42.47	31.82	1.937e-08	0.5477	Rasgef1b
0.1039	18.44	6.6	4.939e-44	0.5585	Setdb2
0.1039	26.54	15.22	3.936e-19	0.5549	Rpph1
0.1039	63.71	51.72	1.87e-06	0.5471	Pcbp2
0.1038	67.86	56.21	1.82e-05	0.5438	Csde1
0.1036	31.27	18.24	7.543e-21	0.5617	Csf2ra
0.1036	43.92	30.77	7.134e-13	0.5585	Cyb561a3
0.1036	29.05	19.52	3.787e-11	0.5461	Creb5
0.1036	61.29	48.82	5.201e-07	0.5487	mt-Cytb
0.1036	62.64	51.3	9.61e-06	0.5442	Elf2
0.1035	89.67	81.45	0.02734	0.5273	Ankrd11
0.1033	14.19	1.534	2.273e-166	0.5631	Gm12250
0.1032	18.44	5.39	2.955e-63	0.5645	Tspo
0.1031	28.57	15.33	7.908e-25	0.5628	Irf1
0.103	84.07	76.51	0.01592	0.5291	Lncpint
0.1024	36.49	23.94	1.011e-14	0.5574	Igsf6
0.1023	57.82	44.22	3.628e-08	0.5515	Sowahc
0.1023	83.11	76.46	0.01863	0.5285	Man1c1
0.1021	57.14	45.46	4.772e-07	0.548	Elf4
0.1021	86.87	76.87	0.01968	0.5283	Cap1
0.1019	37.07	27.15	2.35e-09	0.5477	Gcnt2
0.1019	78.76	71.35	0.003709	0.5331	Atxn7l1
0.1018	30.02	15.32	3.47e-29	0.5682	Psmb8
0.1018	37.16	22.78	1.137e-19	0.5652	Grina
0.1016	61.87	50.1	1.231e-05	0.5435	Atxn7
0.1015	14	3.221	8.788e-69	0.5536	St8sia1
0.1013	64.48	51.77	6.074e-06	0.5451	Ankhd1
0.1012	82.05	70.95	0.008319	0.5308	Notch2
0.1012	89.58	80.53	0.08967	0.5232	Nek7
0.1011	21.91	9.75	2.368e-32	0.5594	Masp1
0.101	30.21	20.28	2.608e-11	0.5472	Gm13710
0.101	52.7	39.26	4.417e-09	0.5527	Htt
0.1009	61.87	48.44	8.011e-07	0.5479	Phc3
0.1007	56.37	44.16	2.106e-07	0.5489	Snx2
0.1007	43.63	34.5	2.492e-06	0.5421	Nrp2
0.1006	67.08	54.84	7.788e-06	0.5451	Ptpn6
0.1005	55.79	43.43	4.475e-08	0.5509	Sec31a
0.1004	52.22	37.67	1.529e-10	0.5562	Selenot
0.1004	53.47	39.28	4.614e-10	0.5555	Sbno2
0.1003	25.87	13.19	1.115e-26	0.5612	Tmem140
0.1002	48.55	35.93	2.11e-09	0.5523	Mroh1
0.1	60.14	48.41	1.423e-06	0.5469	Pea15a
0.1	84.17	74.51	0.01193	0.5299	Fus
0.09997	56.18	43.52	8.938e-08	0.55	Lgals8
0.09986	37.45	25.52	1.944e-12	0.5539	Plekho2
0.09955	24.32	11.12	5.287e-33	0.5635	Nmi
0.09936	88.32	81.86	0.05663	0.5249	Magi1
0.0993	61.39	48.33	2.576e-07	0.5496	Rpl3
0.09926	53.76	39.65	6.254e-10	0.5553	Arpc5
0.09914	46.81	33.55	6.88e-12	0.5577	Rab5c
0.09901	35.71	22.42	9.576e-17	0.5598	Tcof1
0.09888	64	51.64	7.703e-06	0.5446	Map2k1
0.09887	44.4	33.34	3.923e-08	0.5475	Gm26740
0.0987	12.07	3.397	2.75e-44	0.5435	Etl4
0.09853	69.21	56.59	4.348e-05	0.5422	Stat3
0.09847	49.61	36.21	7.316e-10	0.5537	Phka2
0.09837	41.6	28.2	1.453e-13	0.5583	Rpl41
0.09834	56.76	45.11	6.329e-06	0.5437	Scaper
0.09821	48.07	34.49	1.319e-11	0.5575	Rpl5
0.09818	61	47.89	3.985e-06	0.5451	Exoc6
0.098	17.57	7.775	4.183e-26	0.5482	Ptchd1
0.09791	80.02	71.97	0.01899	0.5283	Zeb1
0.09785	74.42	63.65	0.0002441	0.5392	Cfl1
0.09777	31.37	20.12	2.13e-13	0.5513	Gm12865
0.09777	92.66	85.9	0.09428	0.5231	Mycbp2
0.0977	47.1	34.46	2.196e-10	0.5543	Arf3
0.09738	60.04	46.95	7.153e-07	0.5477	Golga4
0.09723	51.06	37.3	7.547e-10	0.5542	Ago2
0.09679	66.02	55.89	0.0004155	0.5372	Eri3
0.09678	38.51	24.91	1.105e-15	0.5601	Bag1
0.09677	42.37	30.91	5.349e-09	0.5488	Cwc27
0.09649	57.92	46.77	3.089e-05	0.5412	Stx8
0.09643	38.22	25.85	3.326e-13	0.5558	Arel1
0.09643	50.87	37.64	1.062e-09	0.5539	Med1
0.09641	42.47	30.39	1.137e-10	0.553	Rps27a
0.09634	45.75	33.72	1.39e-09	0.5518	Ino80
0.09599	41.8	29.33	1.07e-11	0.5548	Tep1
0.09569	81.37	73.09	0.009019	0.5307	Lrrk1
0.09562	41.51	30.69	9.068e-09	0.548	Ccdc88a
0.09546	13.9	4.603	9e-39	0.5466	Fgr
0.09544	95.95	89.77	0.1561	0.521	Lair1
0.09537	66.51	58.02	0.001555	0.5344	Rai1
0.09534	68.82	58.88	0.0004697	0.5373	Xiap
0.09527	28.76	18.32	1.057e-13	0.55	Parp11
0.09525	44.79	31.42	1.481e-11	0.5557	Nono
0.09521	45.17	34.06	3.597e-08	0.5479	Gm40645
0.09518	38.71	25.93	9.366e-14	0.5571	Furin
0.09514	38.71	26.09	2.491e-13	0.5563	Rps18
0.09511	68.53	58.23	0.0002654	0.5385	Nfe2l2
0.09509	37.84	25.11	3.811e-14	0.5572	Tyk2
0.09505	83.2	78.45	0.04937	0.5253	Smyd3
0.09497	69.5	59.2	0.0003908	0.5377	Tmem131
0.09494	68.92	58.74	0.001006	0.5355	Sfmbt1
0.09492	63.13	50.43	2.772e-06	0.5462	Rpl13a
0.09491	62.64	48.2	3.921e-07	0.549	Rps9
0.09484	35.81	23.47	3.748e-14	0.5558	Marchf8
0.09472	52.9	41.89	1.094e-05	0.5419	Pcdhgb2
0.09456	64.09	53.36	7.046e-05	0.5408	Slc23a2
0.0945	69.69	58.4	0.0002471	0.5387	Hnrnpm
0.09443	32.82	21.31	7.731e-14	0.5533	Stim2
0.09434	59.94	48.47	8.123e-06	0.544	Ecpas
0.09429	10.62	2.371	8.86e-55	0.5413	H2-Ab1
0.09427	56.85	43.87	4.129e-08	0.5512	Sdf4
0.09425	54.54	41.15	1.31e-08	0.5519	Fau
0.09423	54.83	42.95	2.445e-07	0.5483	Rpl18a
0.0941	35.23	22.01	1.08e-16	0.5593	Prdx1
0.0941	92.66	88.71	0.0365	0.5265	Gnaq
0.09403	63.51	50.89	1.955e-05	0.5428	Ddi2
0.09403	65.15	53.61	9.292e-05	0.5401	Tnks
0.09385	65.25	53.74	0.0002355	0.5382	Map2k5
0.09383	60.42	47.49	1.517e-06	0.5466	Mcl1
0.09381	19.11	9.259	1.107e-22	0.5484	Ccl3
0.09367	48.65	34.4	3.341e-11	0.5565	Rpl14
0.09361	71.14	59.37	0.0003175	0.5382	Mdm4
0.0936	15.73	4.04	1.107e-65	0.5579	Treml2
0.0936	88.32	81.51	0.1618	0.5208	Btbd9
0.09356	57.53	45.89	7.93e-06	0.5435	Chchd3
0.09354	77.03	65.59	0.005593	0.5317	Usp8
0.09347	38.22	23.68	6.491e-18	0.5631	Sh3bgrl3
0.09345	66.41	57.76	0.001209	0.535	Itpkb
0.09344	59.75	47.77	3.923e-06	0.5451	Abcc5
0.0934	56.47	44.6	6.128e-07	0.5474	Sun2
0.09303	71.62	59.24	0.0002109	0.5391	Eif4g1
0.09301	70.27	58.84	0.00156	0.5345	Lcor
0.09287	73.65	64.01	0.003311	0.533	Rhoq
0.09274	71.81	62.12	0.01305	0.5291	Chst11
0.09267	45.66	32.14	1.603e-11	0.5561	Rps5
0.09266	25.1	12.49	3.899e-27	0.5604	Pnpt1
0.09263	30.5	18.03	8.447e-19	0.5583	Tmem219
0.09255	34.46	22.76	1.089e-12	0.5523	Epb41l3
0.09208	53.19	42.21	6.565e-06	0.5429	Fbxw7
0.09208	72.49	60.89	0.001166	0.5354	Cdk13
0.09191	62.74	50.74	1.638e-05	0.5431	Syngr1
0.09189	96.24	92.62	0.03557	0.5266	Abhd12
0.0918	61	51.06	0.0002625	0.5376	Spsb1
0.09173	50.19	37.61	1.684e-08	0.5503	Eprs
0.09172	44.5	31.22	3.406e-11	0.5548	Rnf115
0.09135	34.56	21.67	2.171e-16	0.5584	Rps19
0.09125	32.53	21.36	3.409e-13	0.552	Mbd2
0.09114	39.67	27.24	4.254e-12	0.5544	Tmpo
0.09106	66.8	53.77	5.852e-05	0.5412	Arpc1b
0.09098	79.34	69.42	0.01479	0.5291	Ppp1r12a
0.09088	44.02	30.36	5.505e-12	0.5562	Dbnl
0.09087	56.66	44.78	1.083e-06	0.5465	Atp1a1
0.09073	27.22	14.84	5.674e-22	0.5583	Eif2s3y
0.09072	26.64	14.73	1.988e-20	0.556	Smim3
0.09072	36.29	22.54	2.19e-17	0.561	Ms4a6d
0.09065	74.32	64.6	0.00596	0.5315	Elk3
0.09044	82.82	73.39	0.01042	0.5303	Sf3b1
0.09041	39.48	27.5	1.274e-11	0.5535	Stard3
0.09041	77.41	67.3	0.01098	0.5299	Anks1
0.09039	18.44	6.821	7.167e-41	0.5572	Tmem106a
0.09031	68.34	57.69	0.00043	0.5374	Gna13
0.09017	58.59	46.59	4.553e-06	0.5446	Ylpm1
0.09012	17.28	5.453	1.805e-51	0.5583	Fcgr4
0.0901	38.42	26.2	1.944e-12	0.5544	Tomm70a
0.09004	15.54	5.084	8.182e-44	0.5519	Kdr
0.09004	58.4	46.43	1.231e-05	0.5428	Pik3cb
0.0899	39	27.2	1.627e-11	0.553	Coro1c
0.08986	53.57	40.84	3.598e-07	0.5472	Appl2
0.08985	69.21	56.83	0.0001812	0.5392	Pitpna
0.08981	49.71	38.36	2.188e-07	0.5471	Smox
0.08972	76.83	66.04	0.003112	0.5333	Daglb
0.08923	73.55	61.94	0.007098	0.5308	Myo9a
0.08914	73.65	64.76	0.002745	0.5335	Ehd4
0.08904	11.39	1.485	6.397e-111	0.5495	Fam241a
0.08902	39.19	27.4	1.386e-10	0.5509	Vps13a
0.08898	38.61	26.99	2.971e-11	0.5523	Plekhf2
0.08898	45.85	35.64	8.083e-07	0.5442	N4bp2l1
0.08898	88.71	80.24	0.06653	0.5243	Plxnb2
0.08883	29.54	19.25	2.805e-12	0.5482	Ddhd1
0.08873	37.64	25.12	1.571e-13	0.5559	Ppib
0.08835	47.01	34.18	2.031e-09	0.5516	Parg
0.08813	40.93	29.24	3.013e-10	0.5512	Taok2
0.08809	63.03	50.22	2.137e-05	0.5426	Tet2
0.08808	58.49	46.24	5.473e-06	0.5442	Cabin1
0.08796	75.1	64.55	0.01452	0.5289	Tec
0.08795	37.36	25.91	3.438e-11	0.5514	B3gnt2
0.08787	87.64	82.1	0.04096	0.526	Sh3kbp1
0.08779	10.33	0.7604	2.998e-167	0.5478	C3
0.08777	14.58	4.99	8.783e-38	0.5477	Tnfsf8
0.08777	57.24	45.21	9.477e-06	0.543	Adcy7
0.08756	93.82	89.74	0.2832	0.5182	Maml2
0.08751	96.53	93.48	0.05709	0.5249	Ikzf1
0.08748	31.27	19.41	1.105e-15	0.5547	Ldha
0.08741	68.24	57.41	0.001063	0.5353	Crlf3
0.08736	53.47	42.66	4.789e-06	0.5436	Soat1
0.0873	36.87	27.17	7.2e-08	0.5436	Slc16a10
0.08706	86.2	78.56	0.03102	0.5269	Capzb
0.08704	59.75	48.65	3.041e-05	0.5416	Arap1
0.08701	52.99	40.8	4.613e-07	0.5468	Ccnl1
0.08696	40.06	29.23	7.48e-09	0.5475	Cdk17
0.08694	75.19	65.57	0.005964	0.5315	Irak2
0.08683	14.77	4.04	2.941e-56	0.5533	B430306N03Rik
0.08682	60.62	48.73	2.983e-05	0.5417	Trip11
0.0868	21.43	11.37	2.476e-19	0.5488	Il1rap
0.08677	98.75	96.27	0.1504	0.5211	Frmd4a
0.08674	23.75	12.43	2.205e-22	0.5546	Got1
0.08666	60.33	49.15	5.002e-05	0.5408	Slf2
0.08665	75.97	65.51	0.01084	0.5298	Celf1
0.08655	38.42	26.98	6.408e-11	0.5515	Rpsa
0.08655	58.88	45.8	2.796e-06	0.5453	Fam120a
0.08654	58.78	47.02	7.01e-06	0.5439	Ctnnb1
0.08635	87.07	79.56	0.03575	0.5264	Hsp90ab1
0.08634	66.02	55.97	0.001192	0.5348	Cog5
0.08627	70.95	59.87	0.001795	0.5342	Herc1
0.08586	84.27	76.02	0.01689	0.5289	Tmbim6
0.08583	37.26	25.39	5.959e-12	0.5527	Tbc1d10a
0.08579	85.04	77.2	0.08573	0.5233	Lcp2
0.08577	97.39	93.93	0.0969	0.523	Dock8
0.08574	49.9	37.34	1.803e-08	0.5501	Eif4b
0.08573	61.87	51.08	0.0002051	0.5381	Atp2a2
0.08552	65.73	54.31	0.0006267	0.5361	Vps13d
0.08542	53.19	41.02	1.085e-06	0.5455	Chd1
0.08542	53.86	42.09	6.305e-06	0.5429	Pcca
0.0854	17.47	9.3	8.778e-16	0.5403	Ccl4
0.08535	78.47	68.45	0.01132	0.5298	ENSMUSG00000095041
0.08515	84.36	76.32	0.06409	0.5244	Luc7l2
0.0849	58.2	45.99	7.126e-06	0.5437	Tlk1
0.08481	61.78	52.56	0.0003444	0.5372	Trim44
0.08478	54.44	41.51	8.192e-07	0.5461	Rps3
0.08475	41.6	29.72	1.277e-09	0.5499	Mdn1
0.08474	17.28	9.628	2.122e-13	0.5377	Clybl
0.08459	51.16	40.45	7.239e-06	0.5423	Srpk2
0.08447	34.27	23.09	1.012e-11	0.5505	Nfkbia
0.0844	53.09	41.35	9.348e-07	0.5458	Rps23
0.08439	55.21	44.38	1.645e-05	0.5418	Atxn2
0.08436	71.81	60.02	0.001369	0.5349	Caprin1
0.08435	63.9	55.84	0.001832	0.5338	Cds1
0.08428	66.8	55.94	0.002036	0.5335	Dnajc1
0.08427	80.31	70.53	0.04327	0.5256	Vav2
0.08417	54.05	43.63	6.04e-05	0.5393	Gse1
0.08408	10.71	1.962	6.374e-71	0.5437	Lpl
0.08398	13.9	3.577	5.06e-58	0.5513	Slc25a22
0.08387	60.23	47.78	1.091e-05	0.5433	Copa
0.08385	19.98	10.37	2.909e-19	0.5468	Cd244a
0.08385	26.64	15.11	5.89e-19	0.5545	Tlr1
0.0838	44.21	33.29	2.18e-07	0.5451	Bckdhb
0.0838	53.09	41.55	2.844e-06	0.5441	Plgrkt
0.08373	50.19	37.74	4.572e-08	0.5491	Ikbkb
0.0835	46.43	36.25	7.571e-06	0.5409	Umad1
0.0834	64.09	53.86	0.0005341	0.5364	Tasor
0.08334	57.53	44.33	8.237e-07	0.5469	Eif3c
0.08307	53.57	42.75	1.104e-05	0.5421	Smarca4
0.08304	32.92	21.87	2.685e-12	0.5507	Ugcg
0.083	50.19	36.61	1.37e-08	0.5502	Rpl17
0.08297	33.11	21.79	2.33e-12	0.5507	Caap1
0.08282	17.57	6.911	4.359e-34	0.5524	Daxx
0.08279	44.98	35.78	1.231e-05	0.5399	Pdss2
0.08277	52.61	40.33	5.779e-07	0.5463	Pbxip1
0.08271	89.09	82.87	0.2256	0.5193	Tcf4
0.08269	54.34	40.96	6.295e-07	0.5464	Usp7
0.08258	54.34	41.17	8.725e-07	0.5459	Ranbp9
0.08253	22.1	11.19	6.009e-23	0.5529	Rnf31
0.08231	65.44	55.19	0.002749	0.5327	Plekhm3
0.08225	76.45	65.42	0.01404	0.529	Brd4
0.0822	55.5	43.6	8.57e-06	0.5428	Cd82
0.08206	57.34	46.7	2.959e-05	0.5413	Ddx39b
0.08204	8.784	0.06299	0	0.5436	Oas3
0.08202	36.58	25.86	1.14e-09	0.5477	Themis2
0.08201	61.2	49.78	8.207e-05	0.5398	Srcap
0.08191	22.88	12.43	6.702e-19	0.5501	Ppm1k
0.08179	41.51	29.9	2.197e-09	0.5493	Ppip5k2
0.08161	68.82	56.81	0.0006031	0.5365	Ifnar2
0.08149	21.24	13.37	1.164e-10	0.5387	St8sia6
0.08135	9.942	0.2835	1.372e-282	0.5483	Gm26797
0.08133	30.5	19.9	5.436e-12	0.5483	Asah2
0.0813	43.73	32.35	3.597e-08	0.5471	Pkd2
0.0812	57.63	48.17	0.0001856	0.5378	Bltp1
0.08115	78.76	71.01	0.04116	0.5258	Arhgap17
0.08108	38.03	25.81	4.977e-12	0.5532	Lrpap1
0.08094	57.43	45.31	9.541e-06	0.543	Wdr1
0.08087	55.89	45.41	4.782e-05	0.5401	Pacs2
0.08083	97.49	95.25	0.09761	0.5229	Zeb2
0.0808	52.32	41.75	2.655e-05	0.5404	Crebrf
0.08075	47.1	35.85	5.393e-07	0.5449	Npepps
0.0807	47.88	36.14	2.01e-07	0.5464	Il10rb
0.08069	45.56	35.23	3.65e-06	0.5417	Fam219a
0.08067	63.03	50.44	0.0001367	0.5389	Dhx9
0.08064	25.77	17.39	6.594e-09	0.5393	Mrc2
0.08047	64.67	52.3	0.0002025	0.5383	Tcn2
0.08045	28.19	16.81	1.191e-16	0.5533	Vars
0.08043	12.45	2.974	5.623e-58	0.5472	AW011738
0.0804	51.54	40.53	7.705e-06	0.5422	Eea1
0.08038	41.41	30.89	7.297e-08	0.5455	Sh3tc1
0.08032	79.05	72	0.0442	0.5255	Capn3
0.08029	37.45	26.42	6.326e-10	0.5487	Eed
0.08024	50.39	38.55	5.12e-07	0.5459	Fxr1
0.08012	39.58	26.64	4.069e-12	0.554	Rpl37a
0.08011	42.57	31.77	1.153e-07	0.5454	Cep192
0.07985	35.62	24.93	5.545e-10	0.5478	Nin
0.07985	40.54	30.03	3.658e-08	0.546	Upf2
0.07951	39.29	27.32	1.404e-10	0.5509	Szrd1
0.07947	47.88	38.79	2.737e-05	0.5395	Inpp4a
0.07946	60.14	48.38	4.759e-05	0.5407	Rps4x
0.07945	31.27	21.6	1.161e-09	0.5446	Zc3h12c
0.07943	45.66	34.65	4.215e-07	0.5448	Xpo6
0.0794	33.4	21.9	1.585e-12	0.5512	Csf2rb2
0.0794	76.16	67.02	0.03066	0.5266	Washc4
0.07937	56.85	47.21	0.0006599	0.535	Dis3l2
0.07924	56.37	47.58	0.0004748	0.5358	Fgd4
0.07922	35.71	24.85	1.817e-10	0.5489	Arl5a
0.07921	95.85	92.44	0.08403	0.5235	Il31ra
0.07917	43.53	33.22	8.85e-07	0.5431	Fam111a
0.07915	31.95	23.93	4.507e-06	0.5364	Mcu
0.07912	16.41	6.776	2.49e-28	0.5472	Plaur
0.07911	82.72	74.66	0.0365	0.5263	Hnrnpu
0.0791	59.94	48.65	0.0001876	0.5379	Ktn1
0.07905	60.52	48.72	0.0001018	0.5392	Phf20l1
0.07897	31.85	22.46	1.925e-08	0.5422	Nfkbiz
0.07896	29.34	19.99	1.07e-09	0.5434	Rab20
0.07888	58.98	47.69	0.0001582	0.5381	Trpm7
0.07888	66.8	59.1	0.01659	0.5281	ENSMUSG00000120385
0.07887	42.47	30.77	7.853e-09	0.5483	Arhgef7
0.07886	23.26	13.44	1.495e-15	0.547	Relb
0.07874	19.11	10.07	1.09e-17	0.5443	Marcksl1
0.0787	15.25	6.128	2.887e-28	0.5451	Ulbp1
0.07859	37.07	26.29	5.818e-09	0.5461	Slc38a6
0.07855	42.76	31.39	2.202e-08	0.5473	Rpl11
0.07849	73.84	64.73	0.008825	0.5303	Spata13
0.07846	20.85	10.62	3.895e-21	0.5496	Asb13
0.07841	24.23	14.02	4.365e-16	0.5486	Glrp1
0.07838	67.28	58.69	0.006356	0.5309	Ube2k
0.07832	83.78	74.37	0.06702	0.5242	Asah1
0.07825	65.93	54.87	0.002895	0.5326	Mrtfa
0.0782	43.24	32.42	1.082e-07	0.5457	Ccnl2
0.07818	55.89	45.64	0.0001136	0.5384	Cntrl
0.07815	52.9	41.87	6.273e-05	0.5389	Tnfaip8
0.07794	18.82	7.5	8.088e-35	0.5549	Psmb9
0.07792	70.08	59.17	0.003104	0.5328	Spag9
0.07786	83.01	74.93	0.1125	0.5222	Ptbp3
0.07782	29.15	17.07	2.187e-17	0.5548	Jak3
0.0778	44.5	34.98	1.842e-05	0.539	Denn2b
0.0777	60.81	49.26	0.0001966	0.5379	Khdrbs1
0.07769	51.93	41.58	2.378e-05	0.5405	Tent2
0.07758	45.66	33.25	3.66e-08	0.5475	Rps6kb1
0.07748	42.57	30.77	7.001e-09	0.5484	Rragc
0.07721	18.05	9.502	7.566e-17	0.5421	Ccnb1ip1
0.0772	9.459	0.1755	0	0.5464	Gm43302
0.07705	84.65	76.52	0.04327	0.5258	Trem2
0.07699	50.58	39.34	4.163e-06	0.5429	Efr3a
0.07674	38.03	27.57	8.551e-09	0.5464	Glb1
0.07671	40.35	29.86	2.008e-07	0.5437	Spidr
0.07665	72.49	62.02	0.01324	0.529	Fkbp15
0.07664	58.98	47.09	0.0001063	0.5388	Arhgef11
0.07619	95.56	90.32	0.7179	0.5132	Frmd4b
0.07613	55.89	44.56	7.362e-05	0.5392	Wbp1l
0.07606	57.53	46.1	8.058e-05	0.5393	M6pr
0.07596	64.48	53.33	0.001818	0.5335	Btaf1
0.07594	60.23	49.89	0.0005246	0.5359	Dpp8
0.07586	30.02	18.8	6.346e-14	0.5509	Nap1l1
0.07565	43.34	33.32	2.067e-06	0.5419	Kat2b
0.07562	18.82	8.567	6.869e-26	0.5501	Mfsd12
0.07559	67.66	56.28	0.004782	0.5314	Akap9
0.07553	40.35	28.14	2.312e-10	0.5509	Rps27
0.07538	37.74	26.19	4.763e-10	0.5488	Cdc123
0.07529	14.09	5.453	1.465e-28	0.543	Chic1
0.07529	60.52	49.79	0.000303	0.5371	Tmem245
0.07524	49.23	37.82	1.642e-06	0.5439	Snap23
0.07516	45.95	33.85	2.618e-08	0.5482	Rack1
0.0751	53.57	42.24	2.067e-05	0.5409	Wdr7
0.07507	48.36	37.18	1.109e-06	0.5443	Rplp2
0.07502	19.88	9.165	3.667e-26	0.5519	Anxa5
0.07501	47.68	35.68	2.574e-07	0.5459	Rpl13
0.07501	50.48	39.99	1.236e-05	0.5412	Hsd17b4
0.07492	65.44	53.58	0.0008422	0.5354	Tmed10
0.07489	35.62	26.82	1.256e-06	0.5397	Plpp1
0.07485	65.44	56.2	0.006783	0.5305	Aff1
0.07479	42.18	31.55	5.613e-07	0.5431	Slx4ip
0.07472	48.36	37.86	2.408e-05	0.5395	Pibf1
0.0747	59.46	48.69	0.0005258	0.5357	Hnrnpa3
0.07457	51.74	39.88	1.529e-06	0.5446	Rpn2
0.07457	79.34	71.2	0.1757	0.5202	Rnf180
0.07456	90.35	86.29	0.2147	0.5196	Arhgap22
0.07455	15.73	5.979	2.031e-32	0.5479	Gbp3
0.07451	29.05	20.32	3.722e-08	0.5399	Plekha5
0.0745	53.57	45.29	0.00313	0.5311	Eml6
0.07446	71.24	61.09	0.01798	0.528	Ubr5
0.07439	24.23	13.79	6.062e-17	0.5496	Coa5
0.07438	22.1	12.01	5.624e-18	0.5482	Zfp992
0.07434	58.01	47.17	0.0001493	0.5381	Nrd1
0.07431	59.94	48.51	0.0001022	0.5391	P4hb
0.07405	51.35	40.73	5.152e-05	0.5389	Cwf19l2
0.07402	22.88	13.66	3.048e-13	0.5436	Alpk1
0.0739	46.24	33.88	8.848e-08	0.5467	Mfsd1
0.07389	78.09	69.68	0.1676	0.5204	Fto
0.07385	13.71	3.311	2.725e-62	0.5515	Chst2
0.07373	38.42	28.53	1.996e-07	0.5431	Hsd17b12
0.07351	13.71	4.639	6.227e-36	0.545	Agrn
0.07348	85.62	81.2	0.4538	0.5159	Prkn
0.07347	44.11	31.98	9.5e-09	0.5486	Tnfrsf1a
0.07344	20.46	13.23	4.417e-09	0.5354	Zcwpw2
0.07343	19.79	10.85	3.547e-16	0.5437	Or5v1b
0.07338	42.08	31.61	8.77e-07	0.5425	Osbpl1a
0.07336	31.66	19.8	1.861e-14	0.553	Naglu
0.07332	47.88	37.43	2.175e-05	0.5395	Slc10a7
0.07325	36.39	26.83	1.344e-07	0.5427	Wdr43
0.07325	65.54	55.32	0.00641	0.5306	Mark2
0.07321	82.63	74.8	0.1233	0.5218	Lnpep
0.07318	52.03	38.67	5.53e-07	0.5459	Pnn
0.07316	72.2	61.45	0.008513	0.5302	Kmt2d
0.07314	72.01	63.44	0.02751	0.5267	Rbm6
0.07308	61.2	51.33	0.002881	0.5321	Nlrp1c-ps - ENSMUSG00000092528
0.07293	74.32	63.66	0.01239	0.5293	Mafb
0.07291	27.51	16.36	3.2e-15	0.5504	Nab1
0.07283	38.32	27.81	4.08e-08	0.5447	Xpo1
0.07267	51.83	42.09	0.0001093	0.5377	Rlf
0.07263	32.82	21.08	4.732e-13	0.5515	Raver1
0.07256	42.66	32.08	4.61e-07	0.5436	Otud5
0.07249	44.69	34.1	2.53e-06	0.5419	Manba
0.07244	42.57	31.93	3.035e-07	0.5441	Tifa
0.07242	60.81	49.64	0.0004846	0.5361	Hltf
0.07241	42.95	31.61	8.425e-08	0.5457	Vcpip1
0.07239	47.88	36.73	4.553e-06	0.5419	Erap1
0.07227	92.66	87.37	0.392	0.5167	Son
0.07221	53.76	42.72	3.014e-05	0.5404	Crk
0.07217	68.15	58.5	0.009804	0.5296	Fbxo11
0.07207	36	25.33	2.495e-09	0.5465	Pycard
0.07205	67.47	56.25	0.003927	0.5319	Wapl
0.07196	93.92	90.31	0.4695	0.5158	Zbtb20
0.07186	47.59	36.3	2.059e-06	0.543	Ttc14
0.07178	63.13	52.73	0.002438	0.5327	Ubap2l
0.07177	21.62	11.55	8.483e-19	0.5485	9930111J21Rik1
0.07174	82.72	75.01	0.2153	0.5195	Anxa3
0.07171	69.88	60.47	0.03308	0.526	Tnfrsf11a
0.07168	12.07	2.826	1.852e-57	0.5459	Atp1a3
0.07167	53.09	42.82	0.000137	0.5374	Sfswap
0.07167	53.86	49.09	0.2646	0.5174	Fgf13
0.07162	67.18	55.83	0.002645	0.5329	Laptm4a
0.07142	68.63	58.67	0.02076	0.5273	Atf6
0.07139	37.74	28.15	7.577e-07	0.5411	Dpy19l1
0.07133	53.57	42.85	8.09e-05	0.5386	Marf1
0.07132	78.38	70.84	0.08791	0.5231	Oxct1
0.07124	52.61	41.83	8.09e-05	0.5383	Atxn10
0.07121	55.31	43.75	7.949e-05	0.5388	Litaf
0.07116	14.09	5.305	6.01e-30	0.5435	Optn
0.07116	67.66	58.49	0.03258	0.5259	Tbc1d14
0.07114	38.42	26.92	1.903e-09	0.5478	Scpep1
0.07109	24.32	15.19	3.702e-12	0.5436	Rbl1
0.07109	41.6	30.45	6.678e-08	0.5455	Rab11fip5
0.07106	37.93	27.76	3.33e-07	0.542	Tspan9
0.071	35.71	24.88	1.471e-09	0.5467	Mapk1ip1l
0.07098	59.46	48.95	0.0006082	0.5355	Pdia6
0.07093	39.19	27.7	3.436e-09	0.5476	Rps7
0.07091	43.92	33.83	1.705e-05	0.5388	Stx18
0.07087	80.6	71.9	0.1787	0.5202	Stard9
0.07082	49.9	37.2	6.211e-07	0.5452	Tial1
0.07077	42.08	31.38	8.907e-07	0.5423	Dnajb14
0.07066	91.12	84.91	0.3421	0.5173	Lcp1
0.07065	10.42	2.367	4.636e-52	0.5402	4933432I03Rik
0.07065	45.08	33.32	2.584e-07	0.5449	Gltp
0.07063	65.06	58.19	0.05328	0.5243	Cdk14
0.07061	21.53	11.56	4.659e-18	0.5475	Cgas
0.07034	23.55	14.03	8.517e-14	0.545	Minpp1
0.07021	8.591	0.3824	1.935e-194	0.541	Ms4a4c
0.07018	42.76	32.13	1.5e-06	0.5419	Vac14
0.07012	43.73	33.58	8.198e-06	0.5398	Raf1
0.0701	40.54	29.47	1.119e-07	0.5443	Gabpb2
0.07004	32.63	21.16	1.929e-12	0.5504	Atp6v1g1
0.06999	37.36	26.31	6.667e-09	0.546	Fbh1
0.06995	20.85	11.32	4.201e-17	0.5458	Slc11a2
0.06993	39.48	29.61	1.975e-06	0.5404	Vwa8
0.06991	36.49	24.89	2.714e-10	0.5486	Naa50
0.06981	43.05	32.97	3.342e-06	0.541	Sfi1
0.06975	96.62	94.01	0.4176	0.5164	Ptprj
0.06971	45.46	34.47	3.047e-06	0.5418	Nbas
0.06965	82.82	75.18	0.1793	0.5203	Pou2f2
0.06962	44.88	34.18	3.985e-06	0.5412	Pxk
0.06959	36	25.29	2.657e-09	0.5464	9530068E07Rik
0.06951	56.27	47.18	0.002194	0.5322	Kif13b
0.06946	46.81	37.11	0.0001132	0.5363	3110082I17Rik
0.06941	15.06	6.114	3.541e-27	0.5441	Arl5c
0.06939	36.1	25.96	5.624e-08	0.5433	Nsd2
0.06931	41.89	30.74	2.014e-07	0.5441	Tox4
0.06927	64.96	52.97	0.002341	0.5329	Ogfrl1
0.06916	21.24	11.12	4.56e-19	0.548	Adap1
0.06914	63.9	55.01	0.00869	0.5296	Kdm7a
0.06909	48.55	38.52	8.09e-05	0.5374	Cyth3
0.06906	19.21	10.35	3.552e-16	0.5428	Itga5
0.06904	41.12	30.96	2.376e-06	0.5407	Galk2
0.069	81.56	78.06	0.5582	0.5147	Cacnb2
0.06899	66.99	55.87	0.002797	0.5327	Erp29
0.06895	49.23	38.15	8.85e-06	0.5412	Man2b2
0.06891	35.33	25.69	8.328e-08	0.5426	Pfkfb4
0.0689	74.81	63.54	0.08205	0.5231	Larp4b
0.06885	28.86	18.28	1.768e-12	0.5477	Coq2
0.06882	18.44	11.14	1.718e-10	0.5355	Pola1
0.06875	16.7	7.244	4.702e-25	0.5457	Serpine1
0.06874	55.41	46.08	0.001009	0.5339	Dram2
0.0686	40.83	31.16	3.118e-06	0.5404	Psmd14
0.06852	64.19	53.45	0.005799	0.5306	Cnot1
0.06844	67.28	56.2	0.005473	0.5311	Mia2
0.06838	12.36	4.531	1.724e-27	0.5388	Mdfic
0.0683	46.43	36.26	2.426e-05	0.539	Slc30a7
0.06829	46.72	35.85	3.159e-06	0.5422	Lipa
0.06809	22.3	13.1	6.517e-14	0.5439	Mvp
0.06799	43.34	34.75	7.884e-05	0.5364	Ccnd1
0.06799	76.83	67.31	0.216	0.5193	Ncor2
0.06792	61.29	49.25	0.0005901	0.5356	Ep400
0.06791	30.89	20.92	7.667e-10	0.5445	Agtpbp1
0.06788	38.9	27.32	2.479e-09	0.5477	Rpl7a
0.06788	27.8	18.87	9.549e-09	0.5402	Esr1
0.06776	42.08	30.93	1.653e-07	0.5445	Dnm1l
0.06775	68.82	59.02	0.01795	0.5279	Zbed6
0.06772	8.398	0.6839	2.58e-125	0.5386	F830016B08Rik
0.06772	12.55	4.522	4.399e-29	0.5399	Gm13391
0.06762	11	3.586	8.758e-31	0.5369	Gm12216
0.06756	70.08	59.42	0.02824	0.5264	Heatr5a
0.06754	26.83	18.41	1.342e-08	0.5395	B4galt5
0.06753	53.38	42.18	5.152e-05	0.5393	Safb2
0.06745	52.22	40.71	1.943e-05	0.5407	Mia3
0.0674	36.87	26.57	1.119e-07	0.5428	Ccr6
0.0674	48.55	39.55	0.0003734	0.5346	Camta1
0.06739	49.81	39.18	4.534e-05	0.5388	Cyld
0.06739	73.36	64.61	0.0797	0.5232	Vps13b
0.06732	42.86	34	8.77e-05	0.5359	Micu1
0.06731	61.39	51.5	0.008974	0.5292	Hipk2
0.06729	36.68	25.25	7.828e-10	0.5477	Rps6
0.06728	57.43	46.99	0.0007487	0.5347	Tra2a
0.06724	6.274	0.3509	4.945e-123	0.5296	Ccl5
0.0672	59.75	49.18	0.002513	0.5322	Stk3
0.06718	73.07	64.74	0.02308	0.5274	Fcgr2b
0.06715	78.47	69.95	0.1231	0.5217	Skil
0.06708	64.67	53.65	0.003247	0.5321	Srsf5
0.06707	40.44	29.01	3.582e-08	0.5455	Arpc3
0.06702	23.55	14.8	6.212e-11	0.5409	Kitl
0.06698	27.9	17.71	2.284e-12	0.5468	Ndst2
0.06696	27.12	16.42	3.042e-14	0.5488	Rpl10a
0.06693	71.33	61.21	0.02492	0.5269	Gnb1
0.06686	35.04	27.75	0.0001453	0.5327	Sergef
0.0668	18.53	8.836	5.954e-22	0.5467	E130102H24Rik
0.06676	29.83	21.79	8.998e-07	0.5372	Slc25a25
0.06662	33.98	24.71	1.369e-07	0.5414	St6galnac4
0.06647	44.21	34.37	2.147e-05	0.5386	Vmp1
0.06646	15.93	6.852	9.757e-25	0.5443	Plin2
0.06637	35.04	24.9	3.562e-08	0.5432	Ripk1
0.06636	37.26	27.68	1.139e-06	0.5403	Tbcd
0.06633	45.08	34.15	2.485e-06	0.542	Ncstn
0.06628	38.61	26.79	2.307e-09	0.5475	Pgd
0.06628	71.81	63.39	0.06553	0.5239	Ubn2
0.06627	6.371	0.5714	1.918e-87	0.529	H2-Aa
0.06616	66.12	57.25	0.01859	0.5276	Chd4
0.06611	44.98	36.13	0.0001523	0.5355	Zfp277
0.06608	43.63	31.63	9.744e-08	0.5455	Supt16
0.06604	31.56	21.34	7.707e-10	0.5448	Atr
0.06603	35.14	25.09	3.76e-08	0.5432	Nadk
0.06594	39.96	30.24	3.489e-06	0.5399	Nemf
0.06582	39.29	28.48	1.052e-07	0.5439	Hspa9
0.0658	53.28	43.25	0.0001618	0.5372	Atp6ap1
0.0657	7.143	1.908	6.092e-28	0.5262	Gna14
0.06561	46.72	35.57	7.682e-06	0.5407	Mgat1
0.06559	14.96	6.807	1.986e-20	0.54	Gm15964
0.06556	76.35	67.65	0.1643	0.5204	Ppp1r21
0.06554	57.05	47.99	0.004308	0.5307	Sltm
0.06552	40.93	30.5	8.209e-07	0.5421	Prkdc
0.0655	17.95	8.836	7.363e-20	0.5443	Slamf8
0.06543	49.23	39.52	0.0003992	0.5345	Ankrd12
0.06539	77.9	68.31	0.1373	0.5212	Nptn
0.06535	68.73	58.31	0.02955	0.5262	Ythdf3
0.06532	66.8	56.74	0.03107	0.5259	Hps3
0.06531	61.58	49.48	0.000799	0.5349	Tcf25
0.06527	53.47	42.45	9.285e-05	0.5381	Bhlhe41
0.06526	92.76	87.97	0.6357	0.514	Fgfr2
0.06525	44.11	34.86	7.181e-05	0.5366	Riok3
0.06517	10.23	1.737	6.348e-74	0.5423	Il2rg
0.06511	58.59	48.85	0.004601	0.5307	Ago3
0.06509	31.27	20.67	1.017e-10	0.5463	Ifi30
0.06502	40.64	30.5	9.373e-07	0.5419	Fbrs
0.06499	36.68	25.52	2.965e-09	0.5464	Gaa
0.06498	41.6	33.47	0.0001627	0.5346	Flnb
0.06496	21.53	12.62	2.473e-13	0.5423	Galnt3
0.06493	39.29	29.35	6.155e-07	0.5419	Taf1d
0.06488	56.76	46.47	0.0006035	0.5351	Hnrnpd
0.0648	44.5	35.51	4.127e-05	0.5378	Ube2j1
0.06479	23.65	14.4	1.807e-12	0.5432	Trim5
0.06471	84.07	75.17	0.3718	0.5168	Crebbp
0.06468	26.83	17.97	2.634e-09	0.5407	Ttc37
0.06441	76.45	67.46	0.2017	0.5196	Usp34
0.06435	32.63	22.49	4.698e-09	0.5438	Taf1
0.06433	41.8	30.55	1.569e-07	0.5444	Rpl37
0.0643	39.77	30.17	7.968e-06	0.5385	Mtor
0.06429	45.75	34.55	4.383e-06	0.5412	Wwp2
0.06429	33.2	24.88	5.369e-06	0.5366	Atg7
0.06426	54.25	44.83	0.001443	0.5328	Cdk12
0.06414	82.72	75.85	0.2469	0.5189	Ncf1
0.06407	38.71	27.05	4.226e-09	0.547	Cdc37
0.06407	37.26	27.63	4.918e-07	0.5414	Gabarap
0.06402	11.39	2.691	2.147e-53	0.5432	Pdcd1
0.06398	45.46	34.67	6.712e-06	0.5406	Rps29
0.06398	45.37	34.79	2.185e-05	0.5387	Spopl
0.06395	81.95	75.56	0.4375	0.516	Zcchc7
0.06394	7.625	0.3149	6.017e-180	0.5366	Gbp4
0.06394	36.68	26.58	1.666e-07	0.5422	Inpp5k
0.06389	62.93	51.53	0.004053	0.5313	Serbp1
0.06387	69.79	60.43	0.03365	0.5259	Ppp6r3
0.0638	41.31	31.57	5.135e-06	0.5398	Bltp2
0.06379	27.9	18.35	2.901e-10	0.5432	Fblim1
0.06377	8.205	0.9898	3.52e-86	0.5361	Lox
0.06373	30.21	21.16	2.199e-08	0.5411	Apaf1
0.06368	44.79	33.05	4.652e-07	0.544	Clptm1
0.06367	60.62	50.57	0.005274	0.5305	Vps41
0.06351	30.5	20.22	1.017e-10	0.5459	Rap2c
0.06351	46.43	36.25	4.617e-05	0.5379	Cyth1
0.06345	56.66	46.61	0.001478	0.5331	Fam13b
0.06343	43.63	32.3	6.82e-07	0.5431	mt-Nd5
0.0634	49.23	38.25	3.352e-05	0.539	Vps26a
0.06338	11.49	3.572	1.011e-34	0.5392	ENSMUSG00000120355
0.0632	27.8	17.93	7.217e-11	0.5441	Snx8
0.06318	9.556	1.219	2.417e-94	0.5416	Ly6a
0.06305	74.81	65.12	0.1364	0.5211	Tnpo1
0.063	15.83	7.455	9.968e-20	0.541	Rhbdf2
0.06299	42.08	31.87	3.709e-06	0.5404	Med15
0.06298	76.64	71.57	0.1588	0.5207	Tbc1d16
0.06297	17.18	8.881	2.748e-16	0.5402	Mmp14
0.06291	62.74	53.99	0.01786	0.5275	Herc4
0.0629	35.91	25.38	2.193e-08	0.544	Gga3
0.06286	66.12	55.94	0.01758	0.5277	Pum1
0.06284	81.47	72.6	0.2207	0.5193	Ncor1
0.06284	63.32	52.61	0.006227	0.5303	Arhgef2
0.06272	35.33	25.07	2.956e-08	0.5435	Ctso
0.06271	14.19	6.879	1.589e-16	0.5361	Sulf2
0.06265	46.91	36.17	3.415e-05	0.5384	Vps50
0.06255	59.94	50.4	0.006505	0.53	Dmxl1
0.06254	21.72	13.38	4.261e-11	0.5395	Herc3
0.06252	29.25	20.1	8.196e-09	0.5414	Clcc1
0.0625	37.64	27.69	1.013e-06	0.5404	Leprot
0.06243	59.94	49.6	0.005863	0.5301	Capza1
0.06238	35.52	25.52	1.362e-07	0.5419	Ipo5
0.06233	9.266	0.7514	1.022e-138	0.5425	Phf11
0.06231	44.98	34.14	5.316e-06	0.5408	Smarca5
0.06223	25.1	17.67	1.545e-06	0.5337	Mgmt
0.06216	43.63	32.77	3.358e-06	0.541	Slc25a5
0.06211	34.36	25.38	1.256e-06	0.5389	Metap1d
0.0621	44.11	34.53	6.142e-05	0.5368	Gpatch2
0.06206	58.98	47.56	0.0005515	0.5354	Rpl21
0.06204	50.68	40.59	0.0003532	0.535	Relch
0.062	33.98	24.56	2.097e-07	0.5408	Dnaja2
0.06196	25.68	17.29	5.961e-09	0.5393	Hnrnpll
0.06192	50.68	40.78	0.0003431	0.5351	Zfc3h1
0.0619	36.58	26.78	5.155e-07	0.5409	Arfgef2
0.06187	15.25	7.932	1.028e-14	0.5363	A930007I19Rik
0.06187	42.28	32.53	1.883e-05	0.5381	Slc9a1
0.0618	77.61	70.33	0.2368	0.5189	Atp2b1
0.06164	56.18	46.25	0.002025	0.5323	G3bp2
0.06158	36.49	25.44	4.882e-09	0.5458	Colgalt1
0.06151	27.51	19.67	1.266e-06	0.5354	Mrps28
0.06129	30.21	22.39	2.415e-06	0.5363	Adam9
0.06128	29.83	19.63	1.038e-10	0.5453	Ist1
0.06119	29.15	19.41	5.113e-10	0.5436	Plekhb2
0.06117	58.78	48.68	0.004666	0.5306	Ppp2r5e
0.06112	70.08	58.65	0.01981	0.5275	Arl6ip1
0.0611	38.22	28.03	6.122e-07	0.5413	Rpl22
0.06106	44.02	34.85	0.000146	0.5352	Grk3
0.06103	39.38	29.12	1.243e-06	0.5409	Dnase2a
0.06102	41.41	32.98	0.0001562	0.5345	Wdr70
0.06101	43.24	33.2	8.013e-06	0.5397	Cndp2
0.06097	37.74	28.45	5.489e-06	0.5384	Lat2
0.06085	30.98	24.19	0.0002527	0.5302	Scfd2
0.06084	44.69	33.24	1.812e-06	0.5421	Tpt1
0.06078	30.69	21.7	1.248e-07	0.5396	Zdhhc3
0.06076	23.84	13.42	3.552e-16	0.5479	Rpl36
0.06074	39.86	29.57	7.779e-07	0.5417	Srrt
0.06065	56.47	45.57	0.0007207	0.5345	Eps15
0.06053	57.72	48.56	0.004295	0.5308	Kif1b
0.06051	34.94	26.03	4.789e-06	0.5374	Tsga10
0.06051	33.4	25.29	8.918e-06	0.5361	Gtf2f2
0.0605	34.75	24.93	1.502e-07	0.5414	Parp4
0.06048	53.86	44.92	0.004252	0.5303	Fbxw4
0.06047	33.98	24.65	5.233e-07	0.5397	Zfp984
0.06041	25.68	16.27	5.064e-11	0.5427	Pcyt1a
0.06038	90.25	84.01	0.9601	0.5112	Arid1a
0.06035	38.71	29.68	1.368e-05	0.5375	Cpne1
0.06034	61.2	52.28	0.01618	0.5276	Ube2d3
0.0603	50.48	41.32	0.001417	0.5322	Cbfb
0.06026	46.04	35.63	1.795e-05	0.5393	Sec16a
0.0602	15.83	9.03	6.401e-11	0.533	Gm12610
0.06014	40.64	30.94	9.761e-06	0.5385	Ube2l3
0.06012	72.97	65.68	0.4009	0.5163	Hdac9
0.06012	58.2	47.84	0.004444	0.5306	Usp48
0.06011	55.31	44.26	0.0007049	0.5343	Sbno1
0.06006	42.37	33.84	0.0001766	0.5345	Nnt - ENSMUSG00000025453
0.06004	71.72	62.67	0.0911	0.5226	Ucp2
0.06	33.88	23.64	1.508e-08	0.5433	Cox4i1
0.05999	68.44	59.2	0.02767	0.5265	Arhgdia
0.05994	35.42	26.13	1.055e-06	0.5396	Mta3
0.05991	60.14	51.04	0.007564	0.5296	Tpp1
0.05988	57.92	46.42	0.001139	0.5337	Sel1l
0.05987	46.43	37.38	0.0003725	0.5341	Gapdh
0.05976	39.48	29.11	4.77e-07	0.5422	Slc25a3
0.05973	25.87	16.43	4.021e-11	0.5431	Rpl35
0.05965	26.25	19.01	4.895e-06	0.5332	Upp2
0.05958	39.67	29.04	3.654e-07	0.5425	Capns1
0.05955	64.58	55.68	0.04235	0.5249	Usp15
0.05954	38.22	27.88	7.549e-07	0.541	Garre1
0.05954	55.41	45.34	0.002633	0.5315	Pik3ca
0.05954	77.61	68.85	0.3257	0.5174	Cd2ap
0.05952	43.34	33.6	1.49e-05	0.5389	Rps24
0.05952	59.07	48.85	0.00258	0.5321	Creg1
0.05949	29.25	18.37	2.141e-12	0.5476	Cant1
0.05948	50.77	39.81	0.0001162	0.537	Cpne3
0.05942	16.41	7.608	6.451e-21	0.5426	Sgcb
0.05942	38.42	28.74	2.011e-06	0.54	Aebp2
0.05941	18.44	11.05	9.228e-11	0.5358	Pgm1
0.05941	36.2	25.64	7.487e-08	0.5427	Nsun2
0.05928	94.02	88.86	1	0.5104	Canx
0.05928	77.03	69.63	0.4817	0.5154	Tmem164
0.05921	36	26.78	2.312e-06	0.5388	Tmem68
0.05919	25.68	17.08	2.667e-09	0.5399	Edc3
0.05915	92.37	88.1	1	0.5095	Asap1
0.05912	55.02	44.83	0.001538	0.5327	Atp7a
0.05909	36.97	28.65	7.682e-05	0.5343	Slc39a11
0.05909	69.02	58.27	0.03193	0.526	Arhgap30
0.05907	46.91	37.41	0.0001847	0.5355	Arf4
0.05906	54.83	43.8	0.0005497	0.5348	Rplp1
[truncated: 55,680 more rows]

## Sheet: DE-Unknow
logFC	pct_1	pct_2	p_val_adj	auc	gene_names
[truncated: 57,010 more rows]
