# Supplementary material for: P2RX7 regulates tauopathy progression via tau and mitochondria loading in extracellular vesicles
Source: Research Square preprint supplement (doi:10.21203/rs.3.rs-6771517/v1), 2025-06-23
Supplement: Supplementary file 9 [file f4b8c6c8a78e5f3e4f3cebac.xlsx]

## Sheet: DE-0_Astrocyte
logFC	AveExpr	p_val_adj	gene_names
-1.049	6.226	7.239e-05	Igfbp2
-0.9988	6.291	7.239e-05	Tmem51
-1.954	4.804	7.239e-05	Ubc
5.687	0.8328	8.395e-05	Cldn34c1
1.478	4.141	8.395e-05	Cmya5
0.7294	8.444	0.0001002	Eif4g3
5.399	-1.329	0.0001121	Gm47860
0.7121	6.471	0.0001121	Btaf1
0.913	6.827	0.0001506	Gpr158
-0.9581	4.853	0.0001506	Cmtm5
2.018	3.097	0.0002762	Ulk4
0.6797	6.471	0.0003452	Aldh7a1
-0.8601	10.61	0.0004667	Apoe
2.143	1.914	0.0007572	4933427I22Rik
2.754	1.431	0.0008655	Atp8b1
0.679	6.91	0.0008655	Ide
-0.9207	4.048	0.0008655	Cbr3
-5.13	-1.436	0.0008655	Gm30613
1.829	1.744	0.0008655	Clstn2
-0.8331	6.525	0.0008655	Mt3
-5.136	-1.386	0.0008655	Actr3-ps
-0.645	6.932	0.0008725	Tspan3
1.319	5.62	0.000879	Nsdhl
-0.7884	7.244	0.0008809	Myorg
1.71	4.856	0.0008809	4833420G17Rik
-0.6735	4.755	0.001017	Ephx1
-0.6346	5.083	0.001069	Selenos
4.545	-1.291	0.001118	Gm49980
-1.637	2.118	0.001118	Rgs5
5.117	-0.5686	0.001164	C130046K22Rik
-0.6385	6.162	0.001271	Smpdl3a
1.185	3.78	0.001271	Cep85
1.121	5.816	0.001271	Agbl4
-1.142	3.105	0.001271	Tmem35a
1.373	3.15	0.001271	Unc80
-0.6514	6.946	0.001271	Calm1
0.7913	4.393	0.001271	Eml1
-0.7853	6.86	0.001271	Gstm1
-0.7226	6.015	0.001271	Hgf
0.5769	5.451	0.001271	Cep120
-0.7179	15.89	0.00129	Rn18s-rs5
-5.258	-0.6405	0.001292	Atp6ap1l
-0.5329	6.256	0.001292	Elovl2
0.7557	6.974	0.001292	mt-Cytb
2.022	6.258	0.001292	Cacna1d
0.638	4.682	0.001349	Rap1gap
0.9754	3.584	0.001361	Kcnip1
1.687	1.12	0.001361	Ano5
-0.6974	6.532	0.001361	Slc25a4
-0.5979	6.469	0.001361	Tmem59
-4.437	-0.8721	0.001361	Gm14584
-4.537	-1.137	0.001434	Cd36
0.8771	8.111	0.001434	Syn2
-0.8341	3.998	0.001434	Tmem129
-0.471	6.231	0.001434	Pnkd
-0.5801	7.003	0.001493	Lamp1
-0.9905	9.247	0.001728	Cst3
1.711	1.805	0.001859	Pnpla3
-0.721	6.17	0.001869	2900052N01Rik
-1.269	3.95	0.001869	Gm47469
-0.8932	5.194	0.001926	Nox1
-0.5911	10.11	0.002076	Gja1
-0.9994	3.254	0.002076	Uqcr11
-0.6342	5.105	0.002184	Tmco1
-1.059	6.923	0.002192	Nme7
2.431	1.059	0.002397	Gm10037
-0.4775	6.586	0.002397	Calr
0.8522	3.903	0.002397	Spef2
-0.5474	4.629	0.002397	Arhgdia
-0.5372	7.462	0.00244	Syt11
0.4757	6.428	0.002585	Luzp1
0.5975	7.847	0.002585	Pcdh11x
-0.6654	7.248	0.002585	Stt3b
1.106	3.494	0.002585	Dusp12
0.5086	6.665	0.002585	Parp8
-0.7912	5.307	0.002585	Tpi1
0.4992	6.753	0.002585	Gpcpd1
-1.101	3.116	0.002585	Rarres2
0.5054	8.656	0.002585	Magi1
1.813	2.976	0.002585	Col1a2
-0.5519	7.201	0.002585	Cldn10
-0.5273	9.446	0.002595	S1pr1
-1.364	3.113	0.002694	Cpne8
-0.4766	6.296	0.002694	Cd63
-0.6649	4.392	0.002694	Ddost
-1.18	11.7	0.002694	Lars2
0.5988	7.211	0.002694	Ddo
0.7905	6.024	0.002694	Adamts6
0.6707	9.616	0.002758	Rgs7
-3.691	-1.294	0.002801	Gm38019
-0.7879	4.376	0.002801	Degs1
-0.6439	4.095	0.002862	Uqcrfs1
-0.6271	4.661	0.002889	Gm13187
0.6276	6.656	0.00292	Dnah7b
-0.9047	3.302	0.00292	Inhbb
-0.611	5.625	0.002921	Rpn1
0.8012	7.178	0.002921	A330033J07Rik
-0.6932	6.803	0.00294	Pcdhgc3
-0.7275	6.638	0.002945	Grina
-1.125	1.795	0.003011	Timm8b
0.9043	3.383	0.003013	Gm26782
-0.5395	8.832	0.00306	Cspg5
-0.6788	4.273	0.00306	Gas1
0.8219	5.954	0.003156	mt-Nd5
-0.6829	5.469	0.003157	Slc22a17
-0.5176	5.13	0.003157	Abhd4
-0.8388	3.452	0.003198	Gm43439
-1.619	2.628	0.003198	Dclk3
1.279	2.683	0.003232	Phf24
-0.4749	6.331	0.003332	Prdx1
-0.7695	4.882	0.003332	Smpd1
-0.8184	6.186	0.003332	Gstm5
0.6915	5.724	0.003332	Pot1b
-0.7532	5.528	0.003332	Slc25a5
-1.156	2.662	0.003332	Mif
-0.4689	5.61	0.003332	Pmm1
0.4247	5.832	0.003332	Zscan26
-0.6003	4.923	0.003332	Acaa2
0.6604	5.32	0.003332	mt-Nd4
1.031	5.208	0.003332	Eya4
-0.5309	6.708	0.003332	Rhobtb3
-1.342	1.462	0.003332	Zc3hav1l
0.7807	3.923	0.003332	Ccdc28b
0.6956	6.539	0.003332	Itpr1
-0.6419	5.971	0.003332	Ankrd29
0.541	6.276	0.003332	Acsl4
-0.49	6.998	0.003332	Itm2c
-0.6027	5.728	0.003334	Saraf
-0.5679	4.959	0.003334	S100a1
-0.636	5.843	0.003371	Gm48747
-0.4225	10.31	0.003441	Trim9
-0.5312	5.565	0.003539	P4hb
-0.4356	8.126	0.003539	Psap
-0.4183	11.53	0.003539	Nlgn1
-0.71	4.61	0.003539	Tspan31
-0.4749	7.863	0.003539	Gabrg1
-0.8809	9.302	0.003539	Mfge8
-0.5909	5.775	0.00357	Btbd17
-0.6892	3.968	0.00357	Ndufb10
-0.5627	4.046	0.00357	Spcs3
-0.519	5.169	0.003679	Arl6ip5
-0.4703	6.741	0.003689	Pcdh1
-0.5581	6.983	0.003689	Fjx1
0.7799	3.57	0.003689	1700027A15Rik
-0.5767	4.4	0.003689	Gdpd2
-0.5442	8.975	0.003689	Prnp
-0.9254	4.442	0.003689	Tmem176a
-0.7679	3.314	0.003689	Rpl7a
-0.4565	6.743	0.003689	Laptm4a
-0.6895	3.854	0.003693	Slc35g2
-0.3593	10.1	0.003699	Gpm6a
-0.6776	4.38	0.003699	Pgap4
-0.4879	5.207	0.003699	Eci1
1.545	2.193	0.003699	Sox11
0.5671	5.51	0.003835	mt-Nd2
-0.785	3.109	0.003835	Tmed3
1.085	5.01	0.003861	Ttll3
0.3903	6.395	0.003867	Cert1
-0.7129	3.895	0.003983	Gabarap
-2.383	-0.668	0.004054	Gm7285
-0.5201	6.184	0.004103	Eef1a1
0.8112	4.702	0.004115	Col23a1
1.235	2.059	0.004159	Fam169a
-0.5964	5.221	0.004159	Cox4i1
-0.8646	3.121	0.004162	Angptl4
0.8598	4.557	0.004162	Mob3b
-0.9046	4.494	0.004288	Chchd10
0.392	7.723	0.004329	Pan3
-0.5701	5.4	0.004329	Plaat3
-0.558	4.878	0.004329	Echs1
-0.4997	8.418	0.004352	Prdx6
-0.9542	3.232	0.004352	Arxes2
-0.4511	5.193	0.004361	Abcb9
-0.7842	3.496	0.00444	Crip2
-0.6339	4.321	0.004547	Atraid
-0.6879	3.485	0.004661	Gatd3a
0.5238	6.664	0.004661	mt-Co1
0.4373	7.662	0.004661	Prickle2
-0.7556	5.834	0.004661	Eif1
0.3545	7.094	0.004661	Crlf3
-0.7338	3.86	0.004661	Mdk
0.3769	6.538	0.00482	Relch
-2.089	2.008	0.004825	Gm10138
-0.5807	4.691	0.004825	Sgcb
-0.5638	6.417	0.005072	Arl6ip1
-0.6255	4.741	0.005097	Cox5a
-2.864	-0.4929	0.005118	Tmprss13
-0.536	4.502	0.005118	Tmem9b
1.234	1.999	0.005118	Copz2
-0.7931	4.218	0.005201	Mmd
-0.3782	7.325	0.005201	Slc1a4
-0.9787	5.264	0.005201	Shisa6
-0.6621	4.89	0.005201	Cox8a
0.6995	3.521	0.005201	Trmt6
-0.4537	6.985	0.005264	Atp5b
-0.5572	6.355	0.005279	Acadl
-0.7087	3.725	0.005291	Rps4x
-0.6144	7.51	0.005305	Cxcl14
0.6411	5.28	0.005305	Ddx10
0.6706	4.921	0.005318	Arrdc3
-0.5203	6.802	0.005391	Hspa8
-0.6439	5.978	0.0054	Pkia
-0.5788	3.956	0.005401	Ndufa8
-0.5735	5.343	0.005401	Ephb3
-0.3466	7.693	0.005401	Notch1
-0.6326	6.744	0.005412	Aplp1
-0.7965	7.068	0.005507	Epha5
0.5551	5.694	0.005516	Gm7967
0.3818	5.798	0.005516	Foxk2
-0.8427	3.085	0.005672	Ficd
0.8982	2.352	0.005672	Tmem88b
0.4174	6.057	0.005827	Fbxw7
-1.526	1.535	0.005856	9330185C12Rik
1.708	1.016	0.005856	Gm31135
-0.6088	3.789	0.005923	Edf1
-0.7158	3.856	0.005939	Adora2b
-0.5012	6.787	0.005951	Kcnj16
-0.8987	3.402	0.006057	Pja1
0.8552	5.997	0.006057	Gm10125
-0.6355	4.492	0.006057	Jun
-0.4343	7.191	0.006087	Hsp90b1
-1.655	4.921	0.006087	Zfp729a
-0.9551	2.131	0.006087	Cops9
-0.5745	5.535	0.006125	Mdh1
-0.5732	5.636	0.006125	Cfl1
0.3713	6.449	0.006125	Hnrnph1
-0.8287	4.247	0.006125	Sfmbt2
0.5066	6.823	0.006125	Skap2
-0.5594	5.135	0.006208	Tmx2
-0.4455	6.578	0.006208	Gnai2
-0.8119	3.315	0.0064	Cend1
0.4149	5.847	0.006576	Cyld
-0.704	4.964	0.006701	AW047730
0.697	4.027	0.006701	Acaa1a
-0.5082	8.168	0.006701	Mfap3l
0.6264	4.922	0.006701	Plod2
1.052	3.453	0.006701	5730522E02Rik
0.5315	6.224	0.006701	Rps6kc1
-1.817	0.3807	0.006701	Gm26531
0.7818	3.193	0.006701	Gm40466
-0.6137	3.838	0.006717	Alas1
-0.564	4.966	0.006747	Ndufc2
-0.7698	2.964	0.006747	Gm21988
-0.4816	4.901	0.006749	M6pr
0.4415	6.429	0.006749	Xpo1
-0.5545	5.871	0.006749	Papss2
0.5237	7.307	0.006749	Mxi1
-0.8773	2.382	0.006793	Rhoc
0.4391	5.228	0.006795	Zbtb11
-0.7751	4.015	0.006802	Pcdhgb7
-0.5462	4.691	0.00682	Selenok
0.388	8.044	0.006894	Aak1
-1.09	3.285	0.006894	Gm42196
-0.6062	5.121	0.006918	Emc7
-0.4722	5.989	0.006918	Timp4
0.3831	7.39	0.006918	Med13l
-0.3443	6.161	0.006918	Spacdr
-0.8706	5.54	0.006918	Naaa
-0.7798	3.725	0.006918	Tmem115
0.6114	5.431	0.006918	mt-Nd1
1.673	0.4881	0.006918	Dcdc2b
-0.35	7.184	0.006918	Gnas
0.7196	3.59	0.006918	Neto2
-0.5946	4.821	0.006918	Mpp2
3.243	2.189	0.006918	Gadl1
0.812	7.234	0.006918	Agmo
0.848	3.487	0.006918	Dnah7c
-0.8251	3.741	0.006918	Gstk1
-0.4127	6.027	0.006949	Mmp14
-0.4636	6.276	0.006955	Kcna2
0.3832	5.981	0.006955	Tcerg1
-0.5261	5.709	0.006955	Ctsl
0.826	6.944	0.006955	Dpyd
-0.4105	6.036	0.006955	Pdha1
-0.4944	5.191	0.006955	Wbp2
2.502	2.437	0.006955	Extl1
-0.5099	5.048	0.006955	Mlf2
-0.5729	4.635	0.006955	Gabarapl1
0.629	3.978	0.006955	BC065397
-0.5705	4.861	0.006955	Ppib
-0.6279	4.853	0.006981	Gm49342
-0.5758	3.587	0.00699	Stom
-0.6669	5.071	0.007044	Fut10
-1.068	1.752	0.007044	Scml2
-0.4586	4.875	0.007052	Rpl4
-0.6651	3.478	0.007074	Ndufs7
-0.5376	4.894	0.007161	Paics
-0.4462	5.997	0.007161	Sqstm1
-0.6506	4.362	0.00722	Irf2bpl
0.6725	8.156	0.00722	Pals2
-0.756	3.818	0.007237	Ppp1r3g
-0.7352	3.263	0.007391	Plxnd1
0.9047	3.749	0.007391	Prkcd
-0.5214	4.745	0.007413	Atp5h
-0.4668	5.629	0.007413	Pttg1ip
-0.6593	3.485	0.007486	Rabac1
0.3816	7.068	0.007515	Cpeb1
-4.752	1.069	0.007548	4930519F16Rik
1.645	5.312	0.007808	Nrg2
-0.5091	4.211	0.007808	Acot13
-0.3413	7.823	0.007842	Hacd3
0.7783	4.053	0.007889	Tatdn3
0.6136	4.651	0.007904	Plpp1
-0.4226	5.584	0.007912	Gm11149
-0.4612	7.645	0.007912	Serinc1
-0.317	7.027	0.008034	Ldhb
0.3542	6.708	0.008159	Cop1
-1.757	0.04494	0.008175	Wnt4
-0.3945	5.749	0.008231	Tmed7
-1.261	0.9239	0.008269	Imp3
2.673	0.3676	0.008283	Gm43647
-0.4055	6.624	0.008293	Atp5a1
-0.9492	1.7	0.008451	ENSMUSG00000121162
-0.4052	4.47	0.008451	Cwc15
0.4025	7.309	0.008451	Gbf1
0.3413	6.215	0.008454	Gm9801
0.3192	7.353	0.008454	Abl2
-0.543	4.227	0.008454	Tmed9
-2.122	0.5021	0.008518	F2r
3.856	-0.2252	0.008571	Ccdc192
1.005	3.037	0.008652	Cyp27a1
1.04	6.059	0.008652	Slc25a21
0.5849	4.914	0.008652	Rpgrip1l
0.5818	4.971	0.008652	Gabrb3
-0.6275	4.643	0.008652	Sox21
-1.444	0.5941	0.008652	Cdkn2d
0.5985	4.578	0.008652	Galk2
-0.594	6.325	0.008711	Ppp1r21
-0.4249	8.871	0.008711	Scg3
-0.6931	2.968	0.008757	Fzd8
1.605	0.3395	0.008759	Tmem51os1
-0.386	5.464	0.008789	Atp6v1e1
-0.6393	4.396	0.008907	B4gat1
-0.5234	4.688	0.008907	Pcbp1
-1.208	2.681	0.008924	Pcdh18
-0.5046	5.654	0.008933	Emc3
0.8385	3.328	0.008939	Dnah14
0.5199	4.516	0.008954	Gstt1
-0.5856	4.549	0.009037	Cldnd1
0.6528	3.538	0.009076	mt-Nd6
-0.4028	4.6	0.009126	Lrp10
0.4888	6.479	0.009164	Iqsec2
1.129	3.467	0.009164	Slc38a1
-0.6991	3.684	0.009205	Tm2d2
0.5692	5.199	0.009205	Tesk2
-0.3977	5.166	0.009205	Uqcrc1
1.6	4.514	0.009205	Rab6b
-0.6225	3.309	0.009205	Ndufb7
0.7639	7.977	0.009205	Dlg2
-0.5516	4.173	0.009205	Cisd1
-0.5681	4.809	0.009205	Ppia
0.4781	4.885	0.009217	Inf2
-0.3873	9.55	0.009245	Sema6d
-0.5173	4.402	0.00926	Zfp706
-0.4886	4.602	0.009292	Ppp1r15b
-0.4788	5.151	0.009307	Serpinh1
0.3865	5.634	0.009307	Sipa1l1
0.3729	6.792	0.009312	Srsf5
0.3292	7.468	0.009403	Psme4
-0.5584	4.286	0.009468	Selenon
-0.632	5.026	0.009536	Bcat2
2.387	-0.05828	0.009538	Gm7644
0.4759	5.96	0.009538	Arhgap39
0.3147	8.328	0.00955	Zfand3
0.3865	6.352	0.009576	Prpf39
-0.4271	4.301	0.009576	Ndufv3
0.4687	4.337	0.009675	Mipep
-1.454	3.923	0.009709	B230206L02Rik
0.4944	11.8	0.009709	mt-Rnr1
0.5424	5.305	0.009735	Trp53inp1
-0.566	7.34	0.009735	Adgrg1
-0.8519	2.574	0.009735	Atp6v1f
-0.4593	5.093	0.009735	Gpc4
-1.083	2.008	0.009735	Mien1
-0.9071	4.691	0.009735	Dmp1
0.4805	7.224	0.009754	Shroom3
0.3446	8.115	0.009754	Zcchc7
-0.4809	5.479	0.009754	Lrpap1
-2.277	1.47	0.009754	Pvr
-0.3929	6.01	0.009754	Lap3
-1.399	0.9154	0.009803	Kif4
-1.199	2.174	0.009803	Iqgap2
-0.5138	4.456	0.009838	Rnf215
-0.4697	4.482	0.009838	Tmem184c
-0.5234	3.437	0.009838	Emc4
0.533	3.759	0.009838	Mon1a
0.6964	5.694	0.009877	Ralgps2
-0.709	3.212	0.009877	Uqcrq
-0.4838	6.572	0.009903	Hspa5
-0.5184	6.398	0.009943	Snx12
0.3731	9.01	0.009977	Map2
0.3096	6.032	0.01005	Klhdc10
-0.658	3.468	0.01006	Mfrp
0.4039	5.671	0.01007	Tecpr2
-0.4105	11.57	0.01007	Slc1a3
-1.134	7.943	0.01007	Gm15564
-0.4644	8.978	0.01022	Astn2
0.4172	6.175	0.01029	Spata5
0.7663	3.884	0.01039	Cacna1c
-0.593	3.778	0.01039	Atp5d
0.3059	6.697	0.01043	Esco1
-1.395	0.4308	0.01043	Dscam
0.4531	6.133	0.01046	Cyb5b
0.8774	4.775	0.01046	A930015D03Rik
-1.147	2.62	0.01046	Ntng1
-0.4357	4.773	0.01046	Lman2
1.869	3.259	0.01046	6430590A07Rik
-0.4347	5.494	0.01046	Magt1
-0.6245	8.88	0.01048	Gpr37l1
-0.6277	3.406	0.01048	Smdt1
0.816	2.527	0.01048	Plekhh2
0.5348	4.069	0.01048	Rnf34
0.3007	7.337	0.01048	Herc2
0.4663	7.586	0.01048	Kansl1l
1.046	1.388	0.01048	Cdca7
0.7865	1.84	0.01048	Pcdhb21
0.9714	3.039	0.01057	Rras2
-0.4548	4.619	0.01057	Selenow
0.4563	4.929	0.01057	Slx4ip
-0.6526	2.936	0.01057	Prdx4
-0.4004	6.508	0.01057	Lrp8
-0.6937	2.579	0.01057	Exosc5
-0.3669	8.93	0.01066	Astn1
0.4292	6.634	0.01079	Cd2ap
-0.7239	4.191	0.01088	Fbxo2
0.5086	7.843	0.01088	Prkca
1.659	4.013	0.01088	Colec12
-0.5291	4.83	0.01093	Pcyox1
-0.5745	6.1	0.01093	Eef2
-0.9027	2.213	0.01099	Mrto4
-0.5325	4.669	0.01101	Surf4
-0.4458	4.166	0.01104	Rer1
-0.5188	6.514	0.01104	Sox2
-0.7231	4.452	0.01104	Cd9
-0.7537	2.742	0.01104	Map1lc3a
-0.3302	7.28	0.01104	Coro2b
0.448	7.622	0.01104	Pip4k2a
-0.6435	4.417	0.01104	Cstf2
0.395	5.127	0.01112	Zfp704
0.327	5.7	0.01114	Dhx9
-0.5755	5.303	0.01134	Bmp7
-0.381	8.115	0.01135	Actb
-0.7068	3.919	0.0114	Slc25a34
-0.4804	3.954	0.01142	Arl1
1.35	0.862	0.01143	Ocln
-0.4334	5.703	0.01143	Slc48a1
1.36	3.101	0.01143	Apobec1
0.9397	2.419	0.01143	Gm7240
-0.687	3.178	0.01149	Nme2
1.95	1.087	0.01156	Susd4
2.083	1.212	0.0117	Cast
-0.6915	2.856	0.01174	Grpel1
-0.5489	6.288	0.01174	Wscd1
-0.3991	5.409	0.01174	Phyh
-0.4839	5.845	0.01174	Slc2a1
-0.3971	4.839	0.01179	Atp6ap1
-0.5425	4.3	0.01179	Idh3g
-0.3721	5.66	0.01179	Selenof
-0.6279	4.427	0.01179	AW011738
-0.3789	6.032	0.01179	Tgfb2
-0.7055	2.504	0.01179	Grcc10
-0.4983	4.518	0.01181	Hgsnat
-0.5506	3.56	0.01181	Slc25a11
-0.4244	4.557	0.01181	Hadh
0.5326	6.557	0.01195	Rimklb
0.9967	3.152	0.01196	Gm30075
0.4966	5.176	0.01196	Lca5
-1.019	4.011	0.01196	Adamts1
-0.6384	3.347	0.01196	Rpl31
-0.5261	3.485	0.01196	BC031181
0.5409	5.191	0.01197	Cacna2d2
-0.6479	3.111	0.012	Cinp
1.006	8.97	0.012	Lrmda
-1.056	1.196	0.01204	Ndn
-0.649	2.634	0.01204	Tmem147
0.5351	4.723	0.01208	Myo16
0.7269	3.245	0.01208	Ank1
0.6037	7.433	0.01208	Cmip
-0.6204	3.555	0.01208	Rpl24
-0.4999	3.971	0.01208	Syf2
-0.4904	4.145	0.01208	Gpd1l
-0.5366	3.864	0.01251	Enpp4
-0.5421	5.037	0.01257	Lgalsl
-3.795	1.264	0.01257	Gm6166
0.3255	6.243	0.01257	Mnat1
-0.3713	8.153	0.01258	Igsf8
-0.5959	3.039	0.01258	Rps27a
-0.8409	2.16	0.01261	B230104I21Rik
-0.337	7.3	0.01261	Eif4g2
-0.4007	4.758	0.01275	Ggh
-0.3801	6.312	0.01277	Pea15a
-0.5441	5.941	0.01277	Omg
0.3369	7.438	0.01277	Reps1
-0.7843	8.388	0.01277	Selenop
-0.7994	4.926	0.01288	Tmem176b
0.2733	6.871	0.01291	Kdm2a
1.266	1.4	0.01291	Trim5
0.9007	5.345	0.01291	Scd1
-0.4683	10.43	0.01302	Glul
0.4554	10.81	0.01319	Pitpnc1
-0.5494	4.422	0.0132	Nat8f5
-0.473	6.151	0.01327	Epha4
-0.7653	5.837	0.01336	Klhdc7a
-0.4988	5.116	0.01344	Rdh11
-0.3664	6.714	0.01364	Rcn2
0.341	6.901	0.01371	Pcsk6
-0.5812	4.912	0.01378	Oat
0.6446	3.968	0.01395	Mvk
-0.7011	3.684	0.01398	Inhba
-0.9356	2.174	0.01399	Samd14
1.543	0.9317	0.01401	Tmem132d
-1.679	1.404	0.01401	Acot12
0.3228	6.554	0.01401	Zfp280d
0.4665	6.073	0.01401	Gca
-0.3506	6.17	0.01408	Chst1
-0.4133	5.379	0.01409	Gas6
-0.4531	5.428	0.01414	Ctsf
0.8911	2.301	0.01417	Gm10516
-0.4362	6.549	0.01417	Hsp90ab1
-1.148	3.578	0.01437	Gm20083
-0.6102	6.104	0.01437	Bsg
2.753	4.962	0.01437	Egfem1
0.3101	7.416	0.01437	Lrch3
0.3473	8.201	0.0144	Acaca
-0.3552	5.741	0.0144	Cd164
-0.3977	8.697	0.01442	Aqp4
-0.6505	3.793	0.01448	Ak1
-0.3607	8.632	0.01468	Timp3
-0.6932	3.417	0.01468	Cd320
0.2687	6.368	0.01468	Dicer1
-0.5448	7.601	0.01473	Gm5089 - ENSMUSG00000115263
0.5426	5.695	0.01474	Aff3
-0.382	5.096	0.01479	Ginm1
1.45	1.793	0.01488	Efhc2
0.5071	4.982	0.01491	Phtf2
-1.305	1.864	0.01491	Cyb5r1
0.4712	3.935	0.01498	Nup155
-0.4097	4.671	0.01498	Map1lc3b
-0.4918	4.48	0.01509	Ndufa4
2.472	5.212	0.01509	Fam163a
-0.5808	5.309	0.01509	A330093E20Rik
-0.5066	4.59	0.01541	Tor3a
0.3993	7.126	0.01543	Sgms1
-0.6397	3.49	0.01544	Gpt
1.411	3.287	0.01545	Ddr2
-0.4613	4.721	0.01549	Cct6a
-0.7258	3.095	0.01549	Psmb4
-0.5706	2.896	0.01549	Pcyox1l
-0.6324	4.576	0.01549	Sod3
0.8408	2.743	0.01549	Nipal2
-0.6882	3.272	0.01569	Pla2g12a
-0.3597	6.589	0.01569	Tmem106b
0.9631	3.163	0.01569	Ppargc1b
-0.5136	3.217	0.01569	Txn1
-0.5763	3.821	0.01571	Ndufa13
-0.6035	3.155	0.01579	Tmem132a
-0.7547	6.39	0.01584	Fth1
0.721	4.323	0.01585	Mgmt
-0.8196	4.458	0.01587	Ubb
0.8866	1.393	0.01599	Pcdhb15
-0.7404	2.731	0.01612	Ndufa11
0.4789	7.363	0.01614	Gab2
0.309	8.17	0.01614	Kansl1
-0.7407	3.458	0.01619	Gm48350
0.5874	4.676	0.0162	Gas5
0.3843	4.972	0.0162	Gigyf1
-0.8387	2.178	0.0162	Tmed1
-0.4841	3.909	0.0162	Pgrmc1
4.17	-1.201	0.01643	Gm32687
-0.6058	2.634	0.0165	Rps29
-0.4163	7.982	0.0165	Slc15a2
0.3911	7.991	0.01657	Tafa5
0.5434	5.402	0.01657	Fnbp1l
0.2932	7.633	0.01665	Nfix
2.392	0.05414	0.01665	Rassf4
0.5137	2.933	0.01673	Zscan12
0.4472	6.78	0.01683	Top1
-1.572	0.102	0.01686	Gm43488
-0.8044	1.887	0.01686	Nubp2
-0.7233	3.792	0.01692	Glmp
0.3805	7.358	0.01704	Luc7l3
0.2727	7.246	0.01708	Kif13a
-0.3129	6.033	0.0171	Tmbim6
0.299	7.788	0.0172	Trip12
-0.4622	4.65	0.0172	Pigt
-2.603	0.7299	0.01746	Gm3143
-0.6294	3.503	0.01749	Piezo1
-0.7987	1.997	0.01751	Praf2
0.3112	8.003	0.01751	Strn3
-0.3372	5.791	0.01751	Nat8f6
1.247	2.687	0.01751	Asic1
-0.7164	3.885	0.01751	4930523C07Rik
-0.4171	3.997	0.01751	Mmgt1
-0.2915	6.442	0.01751	Hadha
0.3679	6.547	0.01757	Ssh2
0.3073	6.832	0.01757	Mbtd1
-0.4955	4.938	0.01757	Kdelr1
0.2909	7.037	0.01769	Pias2
0.2961	5.844	0.01771	Chuk
-0.6679	2.641	0.01771	Mrpl41
-0.3271	5.96	0.01781	Tmem30a
-0.6386	2.802	0.01781	Rpl32
-0.535	4.599	0.01781	Ftl1
1.677	-0.05825	0.01781	Gm11861
-4.939	0.004386	0.01781	Cacng6
-0.3666	5.25	0.01781	Flrt1
-0.4044	5.187	0.01781	Nr2f1
0.2876	6.768	0.018	Mark2
0.4903	3.967	0.018	5330406M23Rik
-0.3329	5.86	0.01809	Aldh2
0.672	3.704	0.01809	Noct
-0.4113	5.212	0.01812	Laptm4b
-0.5233	4.647	0.01822	Cnih1
0.2772	6.231	0.01828	Uri1
0.2795	6.641	0.01828	Baz1b
0.2755	6.09	0.01829	Capzb
0.4282	5.016	0.01829	Taf4b
-0.5481	2.969	0.01829	Ehd1
0.3196	6.36	0.01833	Creb1
-0.5791	3.357	0.01837	Rps3
-0.9155	1.741	0.01837	Mea1
-0.4357	5.731	0.01843	Pamr1
-0.6883	2.855	0.01855	Ndufb11
-0.4406	5.934	0.01862	Actg1
0.3941	3.949	0.01862	Pop1
0.3457	6.847	0.01875	Myrip
-0.6854	3.145	0.01875	Uqcr10
0.8989	2.882	0.01875	Plekhd1
0.6443	3.976	0.01876	Ciapin1
-0.5916	2.852	0.01881	Mrps24
-0.5007	6.065	0.01893	Dhrs3
-1.225	1.172	0.01897	Gm18103
0.2898	8.971	0.01912	Spag9
0.6595	5.779	0.01923	Sipa1l2
-0.5562	3.216	0.01938	C1galt1c1
-0.6794	2.821	0.01938	Irf2bp1
0.2724	6.485	0.01938	Vps54
1.213	1.326	0.01938	Plscr2
0.6791	2.443	0.01938	Gm10419
-0.3591	6.538	0.01938	Phgdh
-0.4405	5.318	0.01938	Spcs2
0.3519	4.681	0.01945	Brd9
-0.7163	1.825	0.01945	Banf1
-0.7144	4.566	0.01969	9630028H03Rik
-0.5026	3.551	0.0197	Rpl22
-0.5129	4.319	0.01975	Hyal1
0.3284	8.529	0.01992	Tle4
-0.3232	6.998	0.01993	Canx
0.6084	4.521	0.01993	Ccdc148
0.326	6.605	0.01997	1110019D14Rik
-0.7828	2.519	0.02002	Acot1
-0.4472	4.669	0.02006	Sod1
0.5001	3.057	0.0201	Tctn2
0.2999	5.966	0.02012	Nnt - ENSMUSG00000025453
-0.5519	3.301	0.02012	Prdx3
1.032	1.787	0.02016	Lrfn2
0.4866	4.756	0.02016	Steap3
-0.3612	5.648	0.02016	Skp1
4.25	-0.5901	0.02017	Zfp125
0.2476	7.519	0.0202	Ppp1r12a
-0.5558	4.104	0.0202	Hes1
-0.404	6.977	0.02028	Pdia3
0.477	4.351	0.02028	Cfap74
0.4981	7.418	0.0203	Actr3b
0.4536	4.332	0.0203	Zfp738
0.9449	2.941	0.0203	Stk33
-0.4433	4.646	0.02032	Slc35f6
-0.4376	4.174	0.02032	Emc10
0.4071	3.981	0.02032	Ccdc173
0.3366	6.922	0.02032	Ranbp9
0.3192	6.702	0.02042	Anks1
0.2997	5.08	0.02048	Iqce
-0.6966	9.63	0.02048	Clu
-0.4073	4.866	0.02048	Prdm16os
-0.9067	2.484	0.02059	Zfp457
0.3207	5.837	0.02062	Btbd3
-0.3296	7.205	0.02063	Cry2
1.338	1.256	0.02079	Dpysl3
-0.537	5.173	0.02079	Enpp5
-0.4314	3.908	0.02082	Zbtb7b
-1.382	0.528	0.02088	Zfp185
0.6694	3.782	0.0209	Tnr
-0.4133	5.695	0.02105	Clptm1
0.3092	7.197	0.02106	Slmap
0.9169	5.462	0.02106	Cep112
-0.5411	3.475	0.0211	Tprgl
-0.597	2.986	0.0211	1700080N15Rik
0.4068	6.137	0.0211	Mrtfa
0.3793	5.989	0.0211	Mdn1
-0.723	6.348	0.02111	Aldoa - ENSMUSG00000030695
-2.37	-0.1231	0.02119	Gm55594
1.194	3.278	0.02119	Prtg
-0.7281	1.858	0.02119	Kpna2
-0.431	5.546	0.02119	Amph
-0.4614	6.98	0.0212	Chrdl1
0.2804	7.827	0.0212	Nim1k
-0.7052	2.677	0.0212	Usb1
0.5682	6.227	0.02124	Zswim5
-0.3634	4.531	0.02125	Txndc15
2.236	-0.5676	0.02128	Gsdmd
-0.4482	5.17	0.02128	Zbtb41
0.6521	5.2	0.0216	Lss
0.3392	5.163	0.02172	Wdr35
-0.3796	4.74	0.02172	Triobp
0.2948	6.142	0.0218	Clk4
-0.4217	4.45	0.0218	Manf
-1.589	0.05202	0.0218	Pnp2
-0.6107	2.673	0.0218	Chpf
-0.4495	3.744	0.02181	Bnip3
-0.4321	7.473	0.02185	Ctsb
0.6058	6.853	0.0221	Dock9
1.622	0.9017	0.02218	Npnt
0.4618	5.548	0.02218	Fbxw4
0.4241	6.135	0.02219	Lrch1
0.6928	3.318	0.02219	Odad1
0.6074	3.028	0.02219	Rfx1
-0.6089	3.03	0.02219	Tspyl1
0.2829	8.694	0.02219	Akt3
-1.847	-0.1708	0.02227	Hs6st2
1.009	4.709	0.02227	Aacs
-0.7641	2.472	0.02227	Tmem256
-0.8087	6.118	0.02227	Fzd2
0.8819	7.66	0.02232	Rgma
0.7587	2.697	0.02237	D930020B18Rik
-0.6109	3.575	0.02246	Park7
1.637	0.6514	0.0225	Gm3055
-0.5197	3.793	0.0225	Gcsh
1.522	0.4429	0.02256	Ppp1r3e
-0.4872	4.015	0.02271	Fzd4
-0.7929	1.996	0.02271	0610009B22Rik
-1.292	1.17	0.02271	Pcsk5
0.4312	9.781	0.02271	Ddhd1
-0.646	3.313	0.02271	Cycs
0.5776	5.294	0.02271	Mettl24
-0.5373	3.597	0.02271	Ndufb8
-0.4452	4.549	0.02271	Pou3f4
-0.4001	4.495	0.0228	Tmem19
-0.372	4.964	0.02289	Tbc1d4
-0.8327	2.094	0.02289	Rps16
0.2832	7.329	0.02289	Mib1
-0.2889	5.536	0.02289	Acsf2
-0.6682	3.627	0.02296	Pcdhga11
-0.6426	3.812	0.02302	Cox6a1
0.2566	7.016	0.02302	Vps13c
-0.4164	4.3	0.02302	Rnft1
0.3096	5.075	0.02309	Ythdc2
-1.148	1.163	0.02309	Mrpl34
-0.5234	4.886	0.02318	Tst
0.6116	3.83	0.02319	Ccdc61
0.358	5.272	0.02337	4933427D14Rik - ENSMUSG00000020807
-0.5506	3.616	0.02337	Rps8
-0.5645	5.947	0.02337	Oaf
-0.3147	5.204	0.02337	Gstz1
-0.4644	5.664	0.02342	Amer2
0.2839	6.513	0.02349	Kif5b
0.6767	4.034	0.02352	Col5a2
0.369	4.84	0.02352	Lrrc1
-1.562	0.5549	0.02353	Cpa6
1.671	-0.3071	0.02355	Mcf2
0.9315	3.154	0.02355	Scn1b
-0.6184	2.97	0.02355	Pithd1
-0.3233	7.206	0.02355	Slitrk2
-0.621	3.266	0.02362	Rps5
0.2815	7.849	0.02391	Fam193a
-0.5032	5.522	0.02391	Ubqln2
-0.4709	3.415	0.02392	Cdipt
0.9259	2.657	0.02392	Tspan33
-0.5495	4.376	0.02392	Il17rd
-0.5548	3.035	0.02394	Slc25a1
-4.481	3.422	0.02394	Gm47283
0.33	5.543	0.02396	Ubp1
0.8319	3.403	0.02397	Radil
0.7557	4.082	0.02411	Mvd
1.09	5.772	0.02418	C030005K06Rik
1.141	2.84	0.02433	Ucp2
-0.545	3.349	0.02436	Fkbp2
-0.6956	7.989	0.02437	Ptchd4
-3.526	-0.468	0.02437	Gm15726
-0.4236	4.235	0.02437	Extl2
0.8649	1.972	0.02437	Shq1
0.2969	7.83	0.02437	Rabgap1l
0.3715	5.997	0.02451	Taf1
0.3384	6.154	0.02452	Med27
0.3177	5.646	0.02455	Supt20
-0.5709	3.44	0.02465	Rpl8
-0.5565	6.734	0.02468	Gapdh
-0.7193	2.808	0.02471	Elob
0.6239	4.138	0.02475	Tpd52
-0.4492	3.591	0.02475	Rpl23
-0.265	5.875	0.02475	Zbtb37
-0.633	2.751	0.02485	Pofut2
-0.4114	7.659	0.02485	Cd81
0.6648	3.127	0.02486	Caprin2
0.3167	6.907	0.02493	Ptpn12
3.486	-0.2842	0.02493	Gpnmb
-0.4235	4.367	0.02494	Eif5a
-0.42	3.479	0.02496	Fdx1
-0.6738	2.666	0.02522	Rps15
0.5027	4.706	0.02533	Mrps27
0.4049	6.188	0.02536	Suz12
0.3033	6.934	0.02542	Snrk
-0.3277	7.64	0.0255	Itm2b
-0.4427	5.134	0.02554	Gpr37
-0.438	5.377	0.02564	Gm49130
0.2382	7.464	0.02564	Dmxl1
0.3047	6.389	0.02564	Pspc1
0.5999	3.399	0.02564	Slc8a3
-0.6436	2.986	0.02573	Atp5k
0.5232	4.756	0.02586	Prune2
1.189	1.246	0.02586	Gm2415
-0.3323	6.956	0.02587	Cnn3
-1.097	0.1217	0.02593	Atp6v0a4
0.274	6.577	0.02593	Zbtb7c
-0.8073	1.533	0.02593	0610012G03Rik
0.2945	8.011	0.02593	Mbnl1
-0.7574	2.378	0.02593	Rny3
0.2623	6.76	0.0262	Pten
0.4239	4.026	0.02629	Spice1
-0.3122	5.516	0.02629	Ghitm
-0.7119	4.363	0.02629	Mageh1
-0.6255	3.143	0.02631	Jagn1
1.385	0.6792	0.02633	Sfrp4
-0.5712	3.39	0.02633	Myl6
-0.7017	1.839	0.02634	H2az1
0.2891	6.478	0.02634	Dok5
-0.6439	2.025	0.02634	Pcsk1n
-0.4014	4.355	0.02635	Rpl3
0.818	2.354	0.02635	Gm46440
-0.5935	6.566	0.02647	Dok6
-0.3435	4.472	0.02647	Gucy1b1
0.2581	6.145	0.02647	A330076H08Rik
-0.4115	4.052	0.02647	Amigo1
1.059	1.217	0.02647	Tnfrsf22
-0.4902	4.331	0.02647	Ndufb9
-0.9669	7.779	0.02653	Filip1l
0.248	6.364	0.02655	Rnf111
0.2899	5.536	0.02655	Usp16
-0.3803	4.105	0.02667	Sigmar1
-0.6216	2.938	0.02667	Rplp0
-0.2707	10.94	0.02687	Plpp3
0.576	7.382	0.02687	Acss2
-0.3511	5.02	0.02697	Fgfrl1
-0.385	5.253	0.02697	Ap5m1
-0.3276	6.662	0.02697	Hk1
-0.6815	2.205	0.02708	Tceal3
0.7097	3.72	0.02708	Spag16
1.018	1.233	0.02708	Pcdhb20
-0.8603	1.021	0.02708	Rpl36al
1.483	0.4572	0.02708	Rab27a
-0.5357	2.576	0.02708	Rps27
0.7403	1.704	0.0272	Meis3
-0.343	6.523	0.02728	Klhl24
-0.9631	1.915	0.02728	Gm54867
-0.3006	6.218	0.02728	Ndfip1
0.98	5.094	0.02746	Galnt10
0.9745	2.785	0.02757	Mri1
-0.3338	5.681	0.0276	S100b
-0.4139	5.017	0.0276	Wdr1
0.3194	5.022	0.0276	Pcnp
0.259	8.277	0.0276	Trak1
-0.6473	1.938	0.0276	Fbxo6
-0.378	4.69	0.02763	Txnrd1
-0.4357	5.746	0.02763	Kbtbd11
0.3221	5.009	0.02763	Ice2
0.4452	4.438	0.02765	Klhl20
0.3333	5.172	0.02774	Ttll4
0.297	8.262	0.02776	Gsk3b
-0.4407	3.781	0.02776	Tlcd5
-1.082	0.5996	0.02776	Naa38
-0.537	3.394	0.02776	Mrps14
-0.491	3.139	0.02779	Cln8
-0.4149	7.06	0.02779	Lrp4
-0.3673	4.921	0.02785	H3f3a
0.3342	4.595	0.02788	Metap1
-0.589	3.752	0.02791	Chchd2
-0.7123	3.436	0.02791	Get3
-0.456	3.374	0.02793	Ubxn8
-0.3711	3.931	0.02794	Cox6b1
0.3023	8.529	0.02794	Tcf12
0.3509	5.078	0.02802	5730480H06Rik
-0.4376	3.198	0.02802	Ndufc1
0.298	5.888	0.02802	Tbc1d12
0.502	3.277	0.02802	Gm1043
-0.2696	7.68	0.02814	Slc7a2
0.4774	10.11	0.02814	Nhsl1
-0.4831	4.647	0.02817	Cox7b
0.5152	4.057	0.02817	Ggta1
0.2992	5.347	0.02823	Cnot6
-0.3986	4.355	0.02827	Fbxo21
0.4167	7.758	0.02828	Rcan2
0.2633	9.992	0.02828	Fmn2
0.5826	3.852	0.0283	Glb1l
1.465	1.135	0.0283	ENSMUSG00000120194
-0.3892	4.383	0.02831	Entpd5
-0.3454	9.002	0.02833	Mgll
-0.4057	4.693	0.02833	Ikbip
0.2717	5.488	0.02849	Map3k4
0.7788	5.011	0.02853	Hsd17b7
0.2401	7.326	0.02861	Arih1
-0.5533	6.056	0.02867	AA387883
-0.5279	5.625	0.02867	Sema6a
-0.2418	7.787	0.02867	Ccdc50
1.316	1.006	0.02867	Kcns3
0.3635	4.386	0.02867	Cep43
2.086	-0.06159	0.02867	Met
0.8004	3.851	0.02867	Xkr4
0.5993	6.451	0.02867	Acly
0.4021	4.294	0.02867	Foxp4
-0.3818	4.21	0.02867	Fam8a1
0.3145	4.676	0.02867	Fez2
0.3207	5.392	0.02867	Ptcd3
-0.4117	4.383	0.0287	Smpd2
-0.3115	5.338	0.0287	Zkscan1
-0.3302	5.986	0.0287	Rhoa
0.4649	3.584	0.0287	Cenpj
0.3244	6.155	0.0287	Acvr1
0.3057	6.038	0.02872	Rassf2
-0.3575	4.444	0.02891	Plxna1
-0.3266	4.479	0.02895	Maged1
0.3033	7.731	0.02899	Acap2
-0.6036	2.496	0.02899	Rps10
-0.588	3.042	0.02903	Spcs1
0.642	4.053	0.02903	Ccdc163
-0.4092	4.361	0.02903	Slc25a53
0.5491	4.343	0.02903	Ppp1r13b
0.5136	2.852	0.02903	C230037L18Rik
0.279	7.051	0.02914	Dennd1b
-0.4434	4.42	0.02916	D630045J12Rik
-0.4947	3.488	0.0292	Ssr2
0.4281	5.124	0.02932	Vrk2
-0.2647	6.835	0.02932	Ostm1
-0.7329	2.788	0.02941	Catsper3
-0.5538	3.406	0.02943	Dnajb5
-0.4124	10.61	0.02945	Lrp1b
-0.3657	4.317	0.02948	Pogk
-0.323	6.254	0.02951	Tmed10
-0.4648	3.332	0.02952	Mrfap1
0.241	6.829	0.02952	Usp15
0.2374	6.516	0.02952	Raf1
0.9315	4.387	0.02952	Gm29521
-0.3361	4.544	0.02953	Ctbp1
-0.356	4.783	0.02953	Crat
-1.026	1.557	0.02953	Gria3
0.2766	7.767	0.02957	Atl2
-0.4041	3.663	0.02963	Ndufb6
0.6557	2.616	0.02963	Blm
-0.2996	5.732	0.02963	Manea
0.2233	7.242	0.02969	Lcor
0.4207	5.853	0.02969	Bcor
0.3479	5.754	0.02969	Eml4
-0.4663	3.799	0.02969	Bet1
-0.5383	3.38	0.02969	Trafd1
-0.4672	4.403	0.02969	Hspa2
-0.296	7.284	0.02989	Gprc5b
0.2605	6.172	0.02994	Lrrfip2
-0.6117	2.678	0.03002	Lzts3
0.8726	2.634	0.03014	Zfp951
-0.5517	3.775	0.03014	S100a13
-0.4171	3.685	0.03014	Cops6
-0.3722	4.044	0.03023	Hnrnph2
0.2957	6.232	0.03023	Kif13b
1.079	1.812	0.03023	Rhbdl2
-0.3391	12.23	0.03027	Frmd4a
-0.9052	2.474	0.03031	Mrpl49
-0.3706	5.127	0.03034	Slc39a10
1.219	1.053	0.03047	9530062K07Rik
1.221	5.244	0.03054	Grik4
0.3692	4.108	0.03054	Prmt7
0.2442	6.904	0.03066	Dcaf6
-0.4581	3.913	0.03066	Hsbp1
-0.3654	4.385	0.03066	Dnajb11
-0.4487	5.855	0.0309	Pygm
0.3369	6.367	0.0309	Kiz
0.2691	9.051	0.0309	Gnaq
1.735	-0.4877	0.0309	Lypd1
0.3584	8.4	0.03104	Atp13a4
0.8737	2.146	0.03104	Shc4
-1.069	9.671	0.03104	Fars2
-0.4895	3.992	0.03107	Qsox1
0.9827	2.771	0.03107	Nudt6
0.3587	4.574	0.03107	Pcdhb14
-0.6767	3.147	0.03112	Bmyc
-0.6256	2.484	0.03112	Higd2a
-0.2879	6.377	0.03112	Sel1l
0.2712	6.299	0.03115	Dock11
-0.2949	6.026	0.03115	Rac1
0.2745	7.34	0.03115	Zmym4
-0.9312	3.894	0.03115	D630033O11Rik
-0.4382	4.443	0.03115	Lamb2
0.4267	4.567	0.03115	Ttc7
-0.4877	3.086	0.03125	Rpl18a
-0.2952	6.834	0.03138	Cbs
-0.6465	2.472	0.03138	Yif1b
-0.3954	4.183	0.03138	Metrn
-0.3178	8.593	0.03138	Serpine2
-0.4939	3.716	0.0314	Mydgf
-0.3305	4.207	0.03151	Rab1b
0.2787	8.33	0.03151	Abi1
0.36	5.504	0.03151	Ercc6
0.4951	8.326	0.03152	Tspan5
-0.4134	4.295	0.03156	Mrps25
0.3577	9.26	0.03156	Adcy2
-0.8822	1.055	0.03156	Nhp2
0.4061	5.605	0.03171	Rbm28
0.2549	6.024	0.03179	Rsbn1
-0.3482	4.565	0.03189	Btg1
-0.7236	2.2	0.03189	Gm28305
-0.3335	4.923	0.03189	Prkcsh
-0.3807	3.77	0.03192	Rps14
-0.4402	4.358	0.03202	Etfb
-0.2689	5.224	0.03206	Arf1
0.6739	8.67	0.03206	Akap6
0.35	7.834	0.03206	Ahcyl2
0.4172	5.819	0.03206	Pfkfb4
-0.2857	5.071	0.03206	Rnf139
0.7841	2.027	0.03206	Slc35d2
-0.4475	3.953	0.03206	Ap2m1
1.448	0.4539	0.03206	Rnf17
0.2317	5.829	0.03206	Brd8
-0.5442	3.101	0.03206	Ndufs8
0.4279	4.059	0.03216	Qtrt2
-0.5617	3.531	0.03217	Eif1b
-0.8449	5.876	0.03217	Prelp
-0.5952	3.544	0.03229	Ebpl
0.334	5.375	0.03233	Zfp326
0.4052	5.094	0.03245	Clasrp
-0.5472	2.944	0.03245	Arl2
0.379	7.338	0.0325	Mef2a
0.3843	3.893	0.0325	Tyk2
0.7339	3.251	0.0325	Ccdc162
-0.4739	3.422	0.0325	Fem1a
1.108	5.088	0.0325	Retreg1
1.567	3.507	0.0325	Mpp7
-0.3591	4.887	0.03254	Pigl
-1.196	-0.03645	0.03261	Gm44421
-0.5138	3.475	0.03271	Elovl4
0.3387	5.543	0.03287	Ccdc66
-0.7814	1.351	0.03287	Mrpl57
0.4394	4.425	0.03291	Tent4a
0.305	5.422	0.03291	Rcor1
0.3169	5.386	0.03291	Ccdc191
0.3832	7.368	0.03291	2210408I21Rik
-0.5453	3.001	0.03291	Rpl28
0.2585	7.372	0.03291	Dock3
-0.4109	4.336	0.03291	Bnip3l
0.4229	8.202	0.03295	Asap1
0.2477	7.179	0.033	Smg1
-0.5784	3.237	0.033	1700010K23Rik
-0.7862	2.588	0.033	Fzd9
-0.6837	9.322	0.03309	Aldoc
1.284	4.596	0.03309	A730056A06Rik
-0.6738	2.921	0.0332	Gm47781
-1.68	0.6541	0.03322	6430584L05Rik
-0.854	2.015	0.03324	Aurkaip1
-0.6098	2.031	0.03344	Fahd1
-0.5573	2.827	0.03346	Dmap1
0.2733	6.21	0.03346	Synj1
-3.198	0.7604	0.03346	Cfap77
0.3193	6.179	0.03357	Rev1
1.368	2.209	0.03357	Dcdc5
-0.4278	3.904	0.03357	Cggbp1
1.234	4.199	0.03364	Gm36723
-0.6123	2.683	0.03367	Rps6
-0.3032	4.587	0.03375	Ankrd46
0.3975	5.737	0.03375	Per2
-1.094	0.931	0.03377	Rarres1
-0.5109	3.509	0.03377	Pcdhgb6
-0.5033	3.952	0.0338	Tuba4a
0.3932	4.777	0.0338	Slf1
0.5944	4.48	0.0338	Pmepa1
0.3098	7.005	0.03385	Dennd4a
0.2358	5.694	0.03395	Brd1
-0.2954	11.82	0.03402	Atp1a2
-0.4024	7.66	0.03402	Aox1
0.7412	1.864	0.03402	Pdzd4
1.74	-0.2366	0.0342	Galnt12
-0.3437	3.907	0.0342	Repin1
-0.5698	4.069	0.0342	Nat8f4
0.2685	6.317	0.0342	Map2k1
-0.2657	5.444	0.03422	Acadm
-0.5374	6.537	0.03422	Septin11
-0.3588	4.034	0.03427	Gm20604
-0.3767	5.72	0.03427	Pax6
0.7428	2.117	0.03427	Napepld
-0.5156	4.3	0.03444	Cyc1
-0.5092	2.647	0.03445	Ajm1
-0.4098	3.976	0.03453	Klf6
-0.922	3.397	0.03457	Inka2
-0.4239	4.215	0.03459	A730081D07Rik
-0.4076	4.058	0.03466	Tmem43
0.5302	4.558	0.03468	Tbc1d16
-1.449	0.2514	0.03471	Pla2g5
0.2581	7.228	0.03487	Pum1
1.021	1.921	0.03487	Emid1
-0.3574	5.103	0.03487	Kdsr
-0.2643	5.725	0.0349	Gdi1
-0.6996	3.056	0.03496	Fau
-0.3438	4.918	0.03496	Yipf5
0.5693	5.698	0.03508	Kcnj3
0.3671	4.937	0.03508	Gtf2h2
0.3256	5.159	0.03508	Ap4e1
-0.4463	3.217	0.03509	Tubb5
-0.4151	3.075	0.03518	Leprot
-0.4254	5.67	0.03532	Tubb2a
0.9669	2.644	0.03535	Duxbl1
-4.084	0.1785	0.03535	Gm16251
-0.2679	5.687	0.03543	Smim14
-0.4906	2.991	0.03544	Rpl41
-0.3231	5.196	0.03544	Atp6ap2
-0.3884	5.888	0.03544	Gaa
-0.2428	6.856	0.03544	Tm9sf2
0.3384	8.071	0.03544	Gpld1
-0.3861	5.682	0.03544	Zfp36l2
0.9429	4.078	0.03544	Slit2
-0.7596	2.488	0.03544	Atp5e
0.3312	6.312	0.03552	Zkscan3
0.4402	3.194	0.03552	Zfp446
0.4524	4.762	0.0356	Cdyl2
2.355	0.7895	0.03561	Epsti1
-0.2967	5.829	0.03565	Efcab14
-0.5766	2.209	0.03581	Zfp637
-0.5408	2.427	0.03588	Fkrp
1.989	-0.1637	0.03588	Ptafr
-0.4038	3.72	0.03589	Lrrtm2
-0.3416	5.706	0.03594	Gm2a
0.2802	5.619	0.03598	Aatf
-0.3995	3.964	0.03599	Rpl13a
0.2462	8.54	0.03599	Ubr5
-0.3628	4.633	0.03599	Rxylt1
-0.2528	7.23	0.03602	Pcdhgc4
-1.011	3.637	0.03627	Rlbp1
0.356	6.691	0.03641	Ccser1
0.2403	6.769	0.03641	Setd2
-0.3014	5.825	0.03647	Cat
0.2193	6.739	0.03654	Usp6nl
0.225	7.758	0.03654	Hlf
-0.4741	3.25	0.03654	Zrsr1
-0.3195	6.105	0.03654	4933431E20Rik
-0.5772	3.138	0.03654	Tmtc4
-0.538	3.731	0.03664	Smim15
-0.5468	3.131	0.03665	Bub3
0.2917	9.944	0.03667	Nebl
0.7592	1.753	0.03672	Zcwpw1
0.3108	6.265	0.03672	Rnpc3
-0.3867	6.261	0.03682	Nkain4
0.2201	7.123	0.03683	Stk3
0.251	5.362	0.03687	Lats2
-0.573	2.441	0.0369	Krtcap2
-0.5352	2.86	0.037	Rpl26
-0.5604	3.376	0.037	Zfp112
-0.3815	4.51	0.037	Cd302
0.5441	2.352	0.037	Pcdhb18
-0.8254	1.753	0.037	Mrpl43
-0.4251	5.615	0.037	F730043M19Rik
0.325	4.426	0.03717	Dcaf13
0.6486	2.76	0.03717	Gm37848
1.621	3.956	0.03722	Atp8a2
0.2631	7.353	0.0374	Gab1
0.2313	6.281	0.03746	Man1a2
0.2359	7.159	0.03747	Rbm5
-0.6809	1.944	0.03747	Taf7
0.8144	2.66	0.03747	Arhgap29
-0.7455	5.095	0.03747	Ncald
2.012	0.7066	0.03747	Lag3
-0.7322	2.158	0.03747	Rab3a
0.8357	7.711	0.0375	Adam23
-0.9746	1.497	0.0375	Ndufa1
-0.3347	4.967	0.0375	Acot7
0.2227	7.215	0.0376	Gigyf2
-0.3242	7.302	0.03768	Rftn2
-0.2783	5.325	0.03774	Fxyd1
-0.4652	3.358	0.03776	Gpc1
0.4416	4.127	0.03778	Fam76a
-0.4364	3.786	0.03778	Tmem198b
0.4526	7.585	0.03782	Cnnm2
-0.5618	3.33	0.03784	Fcgrt
0.2672	6.063	0.03787	Anapc1
0.5951	4.466	0.03788	Vav2
0.5013	5.408	0.03794	Pcyt2
-0.3257	4.136	0.03794	Pyurf
-1.192	0.1233	0.03794	Gm5345
-0.345	5.096	0.038	Emc1
0.2406	5.72	0.0382	Otud4
-0.3748	3.678	0.03823	Agpat1
0.5488	7.095	0.03824	Elovl6
-0.4125	3.561	0.03825	Sptssa
-0.2607	6.828	0.03825	Trerf1
-0.6444	2.727	0.03827	Gla
-0.3369	3.94	0.03837	Tor1b
-0.4895	3.016	0.03838	Rdh14
0.3999	4.107	0.0384	Cherp
-0.3215	6.023	0.0384	Ssr3
-0.359	4.774	0.0384	Klhl9
-0.3047	5.737	0.0384	Fbxo44
0.9003	1.534	0.03856	Zdbf2
0.3563	4.918	0.03856	Slc12a2
-0.3162	4.433	0.03861	Rpl21
-0.5371	2.378	0.03865	1500011B03Rik
0.9965	1.655	0.03888	Srp54a
-0.4835	4.162	0.03889	Slc39a7
-0.3868	6.104	0.03913	Tspan14
0.3669	5.784	0.03913	Igfbp5
0.7123	1.855	0.03913	A730036I17Rik
0.6644	3.31	0.03922	Hoga1
0.763	1.694	0.03922	Adamts17
-0.7091	1.801	0.03931	Slc37a4
-0.6394	2.667	0.03936	Cryab
0.6875	2.304	0.03938	Rrp12
-0.545	3.899	0.03943	Plin3
0.3495	5.256	0.03943	Nars2
-0.5511	3.305	0.03943	Tor1a
-0.3771	4.126	0.03952	Rbbp9
0.9251	1.854	0.0396	C530044C16Rik
1.766	0.5892	0.0396	Abcc3
-0.9201	1.837	0.03971	Cdh6
0.4759	4.366	0.03971	Stk10
0.3188	4.853	0.03972	Ccdc138
-1.044	2.216	0.03984	Gm15663
0.2776	6.794	0.03984	Ikzf2
-0.7587	2.426	0.03984	Lzts1
-0.7844	2.215	0.03988	Gm48967
-0.4632	4.26	0.03988	Fuca2
0.2428	5.997	0.0399	Tpp2
-0.2494	13.71	0.0399	Slc1a2
-0.2827	6.234	0.0399	Dtx1
-0.4485	3.512	0.03993	Ubiad1
0.2803	4.922	0.03999	Birc2
0.3727	5.334	0.04008	Stk4
1.322	0.6	0.04008	Fap
-0.2789	11.24	0.04008	Sparcl1
-0.6174	2.587	0.04015	Mfsd5
1.772	1.383	0.04015	Rbm47
-0.3286	4.375	0.04017	Erlin2
-0.3221	6.609	0.04017	Eno1
-0.2986	8.375	0.04027	Tril
1.108	0.5425	0.0403	Best3
0.5374	3.31	0.04033	D2hgdh
-0.3618	5.17	0.04033	Dnajb9
0.325	5.146	0.0404	Sptlc2
0.2205	8.253	0.04045	Mllt10
-0.5747	4.415	0.04045	Tox3
-0.6659	1.735	0.04048	Vasn
-0.2543	7.587	0.04048	Gm20713
0.5773	2.422	0.04048	Lrrc2
0.3226	5.914	0.04048	Rspry1
0.3834	7.207	0.04048	Rsrp1
-0.5706	2.65	0.04048	Tmem185b
-0.9945	1.266	0.04078	1810010H24Rik
-0.7292	3.007	0.04078	1810024B03Rik
-0.3855	3.914	0.04083	Rab8a
-0.2176	8.463	0.04094	Pygb
-0.246	5.876	0.04097	Syn3
0.359	3.469	0.04102	Inca1
0.5268	3.757	0.04113	Lmo1
0.2187	8.153	0.04114	Kmt2e
-0.5786	2.592	0.04129	Ing1
-0.6198	6.973	0.04129	Mt1
-0.6376	4.186	0.04129	Adra1b
-1.063	0.7586	0.04129	Hmcn1
-0.2643	6.712	0.0413	Cpt1a
0.4125	3.056	0.04131	Zfp583
0.2968	4.506	0.04131	Zfp420
-0.9173	0.344	0.04136	Samd1
-0.4003	4.895	0.04136	Hsp90aa1
0.3009	6.541	0.04136	Alms1
0.2103	9.322	0.04136	Chd9
-0.3464	5.434	0.04143	Sdhb
-0.2927	5.225	0.04157	H13
-0.3945	5.544	0.04162	Lmo4
0.4607	4.64	0.04162	E230016M11Rik
-0.8958	2.28	0.04169	Dnajc28
-0.469	4.679	0.04171	Fam181b
-0.3349	4.937	0.04171	Glrx2
-0.6371	2.475	0.04175	Gm10069
-1.156	0.01829	0.04193	C78859
-0.7539	1.958	0.04203	Gstp1
0.3599	5.711	0.04209	Ak4
-0.4639	4.407	0.04209	Gnb2
-1.074	1.109	0.04218	Tpbg
-0.9443	2.355	0.04227	Gm45650
-0.6408	4.767	0.04227	Fah
-1.262	0.1638	0.04229	Bex2
0.2754	7.066	0.04234	Ppp2r5e
-0.3345	5.367	0.04241	Pdpn
0.5777	3.757	0.04273	Ablim2
0.5969	4.206	0.04275	Spata13
0.9127	5.29	0.04275	Plcl2
0.5623	6.939	0.04291	Hmgcr
0.4432	3.872	0.04292	Gtf2e1
-0.2385	10.68	0.04292	Negr1
-0.3557	4.33	0.04302	Mboat7
-0.434	6.143	0.04303	Tubb2b
-0.4359	3.183	0.04308	Rpsa
0.8562	2.085	0.04308	Tmem63a
-0.4654	3.77	0.04308	Zfp458
-0.3127	8.627	0.04315	Ntsr2
-0.3415	4.721	0.04315	Sdf2
0.2976	5.187	0.04315	Exoc6
-0.6068	1.912	0.04315	Gm14827
0.6445	2.629	0.04315	Exog
-0.9711	0.7125	0.04315	Gm48749
-0.8521	2.519	0.04337	Coq7
0.3119	4.774	0.04337	Mapkbp1
0.2365	6.831	0.04337	Smurf1
-0.5174	3.432	0.04337	Ilvbl
-0.3555	4.267	0.04337	Ncln
0.6966	1.268	0.04337	2900005J15Rik
-0.2888	6.485	0.04337	Hnrnpk
0.2035	6.907	0.04337	Rb1cc1
0.2795	5.663	0.04339	Srsf1
-0.3641	3.858	0.0434	Hs3st3b1
-0.2641	5.073	0.0434	Sypl
-0.3808	4.755	0.04344	Cnp
-1.488	-0.2648	0.04349	Terb1
0.2369	7.471	0.04349	Galnt1
-0.5862	1.86	0.04365	Coa6
-0.725	1.68	0.04365	C030006K11Rik
0.7315	5.938	0.04372	Gm33680
-0.3573	3.304	0.04372	Chmp1b
0.9153	4.945	0.04379	Cit
-0.2983	5.02	0.0438	Cyb5a
0.2164	6.948	0.0438	Zzef1
0.2871	8.059	0.0438	Mfn1
0.4087	4.455	0.0438	Pinx1
-0.2963	6.562	0.04381	Tlcd4
0.442	5.53	0.04381	Crem
-0.2533	9.144	0.04381	Bcan
-0.4563	2.607	0.04381	Rfk
1.862	0.724	0.04386	Ar
0.2562	7.037	0.04386	Htt
0.2662	8.04	0.04386	Kat6b
0.4277	8.466	0.04386	Vcl
-0.5483	3.046	0.04387	Rps17
-0.3969	5.299	0.044	Mdh2
0.2362	5.805	0.04409	Zfp160
-0.5137	4.065	0.04418	Fkbp4
-0.5609	2.421	0.04425	D17H6S53E
0.2514	7.262	0.04425	Zfp609
0.3082	4.773	0.04425	Ppip5k2
0.2274	5.956	0.04425	Zranb1
-0.451	7.103	0.04433	Etv5
-0.3775	3.849	0.04438	Gm11944
-0.3649	4.312	0.04438	Got2
-0.3624	5.072	0.04438	Dhrs7
0.3376	4.842	0.04453	Tmod3
-0.5997	2.825	0.04463	Mrpl14
0.4258	4.361	0.04464	A530072M11Rik
0.4624	4.164	0.04516	Antxr2
0.2821	6.829	0.04516	Ppm1e
-0.7831	2.121	0.04519	Psenen
0.3715	4.702	0.04519	Fam118b
-0.7409	2.119	0.04524	Dsel
-0.3569	4.876	0.04527	Tgoln1
-0.3345	5.651	0.04527	Pdk2
0.249	6.269	0.04527	Bdp1
0.237	5.931	0.04527	2010315B03Rik
-0.26	6.672	0.04527	Hnrnpl
-0.4209	4.468	0.04527	Tubb4b
1.047	1.33	0.04527	Gjc3
0.3183	6.22	0.0453	Trp53bp1
0.4309	7.511	0.04533	Tle1
-0.7341	1.464	0.04533	Kcnip2
0.4622	6.197	0.04533	Ssbp3
-0.5384	4.333	0.04534	Tmed4
-0.3162	4.562	0.04534	Gm20431
0.29	5.278	0.04535	Dcaf1
-0.4407	3.341	0.04535	Rnd2
0.2305	7.645	0.04541	Sfpq
-0.5795	2.123	0.04541	Trappc5
0.2458	6.927	0.04541	Cul3
0.3181	4.315	0.04541	3110082I17Rik
-0.5243	2.283	0.04541	Mrpl46
0.2188	7.911	0.04541	Rbfox2
0.3063	5.937	0.04545	Gm49359
-0.3374	4.511	0.0456	Dstn
-0.7479	1.777	0.04561	Tomm7
-0.5426	2.55	0.04561	Gpaa1
0.604	3.413	0.04576	Smarcd2
0.4653	6.154	0.0458	Gm37679
0.2384	6.401	0.04591	Fxr1
-0.3425	4.799	0.04601	4930594M22Rik
-0.5363	2.815	0.04602	Slbp
-0.8951	0.4372	0.04608	ENSMUSG00000120996
0.9492	5.139	0.04608	Disc1
-0.8538	1.608	0.04614	Prps1l3
-0.3324	4.663	0.04615	Zfp386
0.4434	4.797	0.04615	Aven
-0.5362	3.025	0.04615	Aqp11
0.3782	7.216	0.04617	Ankrd6
-0.3942	3.938	0.04625	Atp5j2
-0.3379	4.177	0.04625	Mpdu1
-1.735	-0.1496	0.04639	Gpr4
-0.2576	5.909	0.04644	Ddb1
-0.3621	4.164	0.04647	Fam217b
-0.5329	3.731	0.04648	Pgbd1
0.2678	5.473	0.04654	Mphosph9
0.236	5.912	0.04654	Wdr37
-0.53	2.654	0.04654	Stoml2
-0.261	5.712	0.04661	Aldh5a1
-0.4622	3.173	0.04661	Mapk3
-0.4511	4.16	0.04661	Vegfd
0.2394	6.208	0.04661	Slc38a9
-0.2535	5.791	0.04662	Mccc1
0.4034	4.814	0.04677	Enpp2
0.2311	6.89	0.04682	Thrap3
-0.4764	3.015	0.04691	Tceal8
0.1987	6.726	0.04691	Cul1
0.2268	5.696	0.04691	Ireb2
0.2261	6.612	0.04691	Evi5
0.2404	6.717	0.04691	Lyst
-0.282	9.333	0.04691	Tox
-0.4315	3.138	0.04691	Ckap4
0.3172	8.415	0.04691	Mboat2
0.2762	6.391	0.04691	Pikfyve
0.3277	5.569	0.04691	Map3k1
-0.3055	8.66	0.04691	Slc27a1
-0.4962	2.542	0.04691	Ogfod3
-0.7476	8.562	0.04691	Rbms3
0.2926	4.243	0.04691	Mapkapk5
0.2711	7.344	0.04691	Hivep1
-0.531	2.665	0.04691	Arf5
-0.2603	5.359	0.04691	Tmx1
-0.3175	5.39	0.04691	Anxa5
-0.2493	5.812	0.04691	Vdac2
0.3012	4.893	0.04691	Ints9
-0.3587	4.286	0.04711	Cct7
-0.3018	5.466	0.04719	Ppt1
-0.5586	4.781	0.04719	Pcdhga12
-0.2573	5.801	0.04724	Cd99l2
-0.7008	1.273	0.0474	Gm45820
0.298	4.956	0.04741	Cfap36
-0.3917	3.731	0.04741	Tmem9
-0.4052	5.173	0.04741	Dglucy
-0.2548	7.191	0.04763	Plxnb1
-0.5145	3.165	0.04763	Gm11627
0.7295	1.689	0.04763	Iqcg
-0.3455	5.341	0.04763	Tpgs2
-0.2567	6.118	0.04763	Amfr
-0.5511	3.418	0.04763	Ring1
-0.5641	3.43	0.04763	Tpt1
-0.3673	4	0.04763	Fuca1
0.1949	7.273	0.04773	Cep350
0.7535	7.972	0.04784	Pde4b
-0.364	3.986	0.04788	Aga
-0.2911	4.472	0.04788	Tmem127
-0.4457	3.368	0.04798	Anapc11
-0.2857	5.199	0.04799	Ifnar1
0.296	4.961	0.0481	Atf1
0.3547	4.732	0.04812	Naa30
1.069	0.8016	0.04814	Slc22a18
-0.4601	3.265	0.04817	Bbs12
0.2174	7.468	0.04817	Zfr
3.626	1.796	0.04831	ENSMUSG00000121318
0.3242	9.095	0.04831	Tcf7l2
0.3571	9.054	0.04831	Mcc
-0.3821	4.171	0.04831	Arl2bp
-0.2476	9.115	0.04848	Acsl6
-0.4821	2.764	0.04865	Smim8
0.9546	1.918	0.0487	Cspg4b
1.778	2.732	0.04871	Reln
-0.3647	4.316	0.04871	Sbds
-0.3118	4.372	0.04871	Snx33
0.3921	5.287	0.04871	Ncoa3
0.8993	7.238	0.04886	Usp53
0.3023	5.082	0.04886	Tmem87b
0.7927	6.941	0.04886	Ldlrad4
0.2943	7.943	0.04886	Cdk19
0.2336	7.95	0.04886	Ppp1r9a
0.5168	4.029	0.04886	Bsn
-0.4122	3.883	0.04886	Ramp2
-0.3132	4.787	0.049	Rnf11
-0.6039	2.404	0.04911	Gm45193
0.2439	7.772	0.04911	Rev3l
-0.3885	3.244	0.04919	Fzd7
0.2438	7.44	0.04919	Crtc3
-0.3127	4.168	0.04919	Btd
0.2797	8.728	0.04919	Pid1
0.4235	4.635	0.04919	Vangl1
-0.6769	1.076	0.04919	Sardhos
1.16	0.6466	0.04919	Gm3604
-0.517	3.024	0.04919	Ndufs6
0.3392	5.566	0.04919	Hycc1
0.2573	6.439	0.04919	Dmxl2
-0.2808	4.743	0.04919	Jkamp
-0.4012	4.132	0.04919	Adh5
0.2923	6.62	0.04919	Atp13a5
0.5503	2.59	0.04921	Nme5
-0.8687	1.163	0.04923	Tmem177
-0.3625	3.635	0.04926	Thy1
-0.4344	5.469	0.04926	C030037D09Rik
-0.5984	2.26	0.04926	1700027H10Rik
-0.5464	2.916	0.04926	Rrs1
0.7549	2.686	0.04926	Slc5a11
-0.6124	8.138	0.04926	Mir6236
0.255	5.378	0.04931	Gon4l
0.4481	8.666	0.04931	Nav2
0.1996	6.235	0.04931	Ric8b
0.6378	1.411	0.04931	Kif9
-0.4893	2.677	0.04931	Gm12925
0.2021	7.19	0.04931	Dip2b
-0.3866	5.706	0.04931	Dbi
-0.2919	5.027	0.04932	Mpv17l
0.7428	2.241	0.04932	Ciart
0.4247	3.459	0.04932	Elac1
0.2072	6.717	0.04948	Stim1
0.7933	2.6	0.04951	Gm31508
-0.4024	3.791	0.04951	Glis2
-1.13	7.184	0.04951	Csmd1
-0.3699	3.947	0.04951	Psma7
1.304	0.1992	0.04951	Ngfr
-0.2737	4.866	0.04951	1500004A13Rik
0.3254	6.124	0.04951	Mtss1
-0.8741	1.395	0.04954	Prr7
-0.3055	4.171	0.04954	Tmbim4
0.8535	0.9437	0.04954	Col7a1
0.1975	7.403	0.04962	Mtmr3
-1.151	-0.1634	0.0497	Zbtb12
0.3742	6.372	0.04977	Insig1
0.2617	5.599	0.04977	Eefsec
0.2779	5.166	0.04977	Pnpt1
-0.2768	8.054	0.04977	Fgfr1
-0.4437	2.983	0.04981	Prr13
-0.2535	5.855	0.04981	Ctdsp2
-0.416	3.574	0.04985	Nxt2
0.8669	2.774	0.04985	Gm45341
-0.265	5.18	0.04993	Dbt
-0.3764	3.692	0.04993	Paip2b
0.2447	7.808	0.05016	Gpatch8
0.6607	3.346	0.05033	Zc3hav1
0.2131	6.344	0.05033	Sdccag8
-0.2763	7.513	0.05033	Aplp2
0.1902	7.11	0.05033	Arhgef11
-0.3503	3.853	0.05033	Mtap
-0.3661	3.955	0.05033	Tmem109
1.469	0.03637	0.05043	Pcdha3
-0.5193	2.406	0.05063	Smim29
-0.5975	3.306	0.05073	Cyfip2
-0.4303	2.862	0.05073	Iscu
0.4278	3.749	0.05073	Mbd6
0.3562	7.821	0.0508	Gm38666
-0.8766	2.219	0.0508	Myh6
0.4903	3.553	0.05089	Abcb4
-0.4468	3.382	0.05089	Gm41609
0.2714	4.712	0.05089	Ccdc57
0.2108	6.881	0.0509	Smurf2
0.3518	8.783	0.0509	Znrf3
-0.4401	6.846	0.05091	Vcam1
-0.3157	4.766	0.05095	Insig2
0.403	3.755	0.0511	Fam229b
-0.3552	3.898	0.05127	Abhd13
-0.4209	2.995	0.05133	D930015M05Rik
-0.4248	3.07	0.05133	Taf9b
-0.3774	3.703	0.05133	Pigv
0.2818	5.393	0.05133	Btbd10
0.2505	5.987	0.05133	Cr1l
0.4047	4.512	0.05139	Lrig3
-0.307	8.654	0.05139	Xpr1
-0.3582	3.415	0.05142	Cbx4
0.2994	6.091	0.05142	Mef2d
0.4238	4.601	0.05142	Homer2
-0.5233	2.77	0.05142	Rps26
-0.6851	2.242	0.05142	Piga
0.2359	5.56	0.05143	Thoc1
0.9183	3.191	0.05143	Csrnp3
0.9287	0.03599	0.05143	BC028528
0.4151	3.689	0.05143	Lmln
-1.13	1.304	0.05143	Gm15851
0.3236	4.871	0.05143	Adgra1
0.4885	5.753	0.05143	Kcnk10
0.2087	7.834	0.05143	Chd7
-0.3287	5.301	0.05143	Trpc1
0.2431	6.778	0.05143	Cpsf6
0.2159	7.515	0.05149	Nfyc
-0.4949	3.973	0.05149	Vhl
0.219	6.332	0.05151	Sik2
0.2356	6.219	0.05156	Rapgef6
1.749	0.1281	0.05167	Hvcn1
1.43	1.836	0.05167	Nr4a1
-0.3711	3.952	0.05167	Ptpmt1
-0.2771	7.546	0.05167	Pou3f3
1.966	0.6603	0.05168	Sla
1.69	0.382	0.05171	Gm44860
-0.4905	6.049	0.05171	Hs3st3a1
-0.3382	3.957	0.05171	Akt1
-0.2197	6.561	0.05177	Nr1d1
1.145	1.789	0.05191	D7Ertd443e
0.2055	7.897	0.05211	Arhgap21
-0.4624	3.134	0.05211	Gm38250
-0.6206	2.336	0.05213	Nudt11
-0.3339	7.953	0.05213	Celrr
-3.05	-0.9711	0.05213	Gm12160
0.2341	6.061	0.05215	Ankrd13c
1.269	0.8658	0.05223	Cdh18
-0.5377	2.275	0.05224	Eif6
-0.5335	3.358	0.05231	Rpl19
0.8171	3.092	0.05231	Cfap69
0.255	6.06	0.05231	Chd1
-0.3862	3.22	0.05231	Mamdc4
0.2312	5.594	0.05237	Cnot10
0.2222	7.258	0.05238	Rfx7
-0.4125	3.144	0.05241	Dpagt1
-0.4342	3.422	0.05241	Cpt2
-0.6312	3.021	0.05241	Ston1
-0.6999	1.525	0.05241	Wdr5b
0.2251	7.775	0.05241	Herc1
0.2534	6.62	0.05241	Nup98
-0.4855	3.333	0.05241	Nosip
-0.6054	2.509	0.05271	Blvrb
-1.542	0.09307	0.05271	ENSMUSG00000120490
0.2189	5.852	0.05273	Eif5b
-0.2484	7.085	0.05277	Plekha7
-0.3299	6.239	0.05277	Mid1ip1
0.2872	4.535	0.05284	Utp14a
0.2976	6.002	0.05284	Afdn
-1.118	0.7976	0.05284	Capn9
0.8313	1.277	0.05284	Gm11077
-0.2675	4.497	0.05293	Tsn
-0.9703	0.4082	0.05295	Gm715
-1	4.576	0.05297	Slco1b2
-0.2868	5.668	0.05297	Gclm
0.2854	5.136	0.05298	Kras
0.4845	5.933	0.05298	Map3k19
0.2751	6.597	0.05298	Sbno1
0.2443	7.078	0.05298	Cdc73
-0.2648	5.533	0.05298	Bpnt2
0.6824	4.442	0.05305	Pbx3
-0.5835	3.561	0.05305	Olfml2a
-0.4171	6.457	0.05305	Aldh6a1
0.4046	7.666	0.05313	Map2k6
-0.2276	7.047	0.05327	Adhfe1
0.3856	7.542	0.05336	Irf2
-0.7644	2.356	0.05336	Tuba1b
-0.2754	4.532	0.05336	Dcaf11
0.2254	6.493	0.05336	Gtdc1
0.2291	6.487	0.05348	Ino80
-1.168	3.927	0.05359	Hmgcs2
-0.5953	2.855	0.05359	Rpl37a
0.6094	1.778	0.05359	Obsl1
0.2359	5.294	0.05366	R3hcc1l
0.2757	6.899	0.05366	Lrp6
0.3574	5.488	0.05366	Ralbp1
-0.979	0.9083	0.05366	C1qtnf5
0.4494	4.631	0.05366	Fancl
-0.4943	3.265	0.05375	Tbcb
-0.6598	1.31	0.0539	Rtl6
-0.4293	3.377	0.05391	Nudcd2
0.2308	7.827	0.05391	Rbm25
0.2358	5.999	0.05393	Naa16
0.2567	5.442	0.05393	Ift74
-0.3341	4.788	0.05393	Rnf141
-0.4233	7.241	0.05393	Adra1a
0.3528	4.984	0.05393	Ttc27
-0.4178	4.793	0.05393	Gm38604
-0.812	1.086	0.05393	Aspm
-0.2203	6.308	0.05397	Nlgn3
0.3851	4.588	0.05408	Fam20c
0.2714	5.168	0.05408	Ndufaf5
0.233	5.319	0.05411	Pus10
0.2459	5.275	0.05412	Cep162
1.056	1.51	0.05412	Ppp1r18
0.2894	4.612	0.05416	Rpe
0.3292	4.399	0.05429	Snn
-0.2268	8.467	0.05434	Baalc
0.7705	4.156	0.05439	Sel1l3
0.8661	3.762	0.05439	Plpp4
-0.6947	1.227	0.05452	Ccdc74a
-0.3651	3.944	0.05452	Llgl1
-0.4847	2.438	0.0546	Gm42439
-0.483	2.638	0.05465	Acads
0.5398	3.267	0.05467	Ikbke
-0.3514	4.257	0.05467	Slc25a20
-1.263	-0.01564	0.05472	Cyp2j13
0.249	6.496	0.05472	Mthfs
-0.4216	2.785	0.05476	Atp5g1
0.4696	2.763	0.05488	Gm2238
-0.3073	4.436	0.05488	Zfyve21
-0.3737	3.341	0.05488	Zfp729b
-0.4887	4.943	0.0549	S100a16
0.2454	8.583	0.0549	Crebbp
-0.3814	6.726	0.0549	Car2
0.2027	7.193	0.05491	Arid2
-0.3024	4.069	0.05491	Cnpy3
-0.9313	1.399	0.05491	Nop10
-0.2498	7.122	0.05504	Gpi1
-0.2558	5.237	0.05514	Ctnnal1
0.8428	0.7223	0.05523	Gm10558
0.8223	0.8349	0.05524	Rsl1
-0.2713	8.153	0.05524	Pcdh10
0.4657	3.961	0.0553	Lacc1
0.3034	4.322	0.0553	Wdr75
-0.3151	5.99	0.05556	Tmem229a
-0.3135	4.137	0.05559	Swi5
0.2117	8.318	0.05569	Ddx17
-0.4503	3.017	0.05572	Rfesd
-0.3111	4.71	0.05572	Fkbp3
0.2493	5.743	0.05581	Smarcad1
0.2279	6.165	0.05592	Sap130
0.8131	2.108	0.05596	Camk2a
0.3445	3.6	0.05599	Cep44
0.2155	7.349	0.05599	R3hdm1
-0.4018	4.063	0.05599	H1f0
0.2745	6.414	0.05599	Arhgap17
-0.4823	2.689	0.05599	Rps11
0.2024	9.909	0.05599	Hivep3
0.2631	6.018	0.05599	Uimc1
-0.6849	2.349	0.05599	Shisa2
-0.2549	7.673	0.05599	Mlc1
-0.5538	2.772	0.05599	Smim7
0.6653	5.488	0.05599	Sh3gl2
-0.7035	2.094	0.056	Gm47898
0.2713	9.537	0.05601	Lncpint
0.2896	5.937	0.05601	Znrf1
-0.368	3.422	0.05601	Rps23
-0.2725	5.309	0.05603	Rad21
-0.3122	3.731	0.05605	Oaz1
0.2409	6.864	0.05615	Xkr6
0.243	6.115	0.05615	Chaserr
0.2398	5.854	0.05615	Lmbr1
-0.446	3.545	0.0563	ENSMUSG00000119984
0.6784	1.947	0.05632	Fgfbp3
0.2937	4.169	0.05639	Cep152
-0.3081	4.934	0.05639	Fbxo10
-0.2846	5.151	0.05639	Ro60
-0.3174	4.635	0.05639	Atp5o - ENSMUSG00000022956
0.8996	5.135	0.05639	Syndig1
-0.3146	3.764	0.05639	Sdhd
-0.5157	2.904	0.05639	Slc46a1
0.214	5.801	0.05639	Hnrnph3
-0.424	6.561	0.05642	Hectd2os
0.5846	2.217	0.05647	Dnai2
0.226	7.317	0.05648	Zfp516
-0.3006	4.877	0.05649	Sub1
0.3735	3.77	0.05663	Rpf2
-0.3523	3.126	0.05668	Rnf181
-0.326	6.737	0.05668	Slc9a3r1
-0.4144	3.932	0.05681	Slc35a2
-0.4703	2.294	0.05682	Gm20186
-0.3145	4.093	0.05692	Tmem70
0.2161	7.122	0.05739	Cnot2
0.2973	6.066	0.05752	Wsb1
-1.186	0.2552	0.05752	Abcc12
0.6182	3.658	0.05754	Nalcn
-0.7221	2.597	0.05758	Cd44
-0.4773	3.488	0.05758	Rnf187
-0.3558	3.953	0.05769	Mesd
-0.2249	5.774	0.05773	Rab12
0.2893	6.042	0.05773	Gpbp1
-0.4799	2.955	0.05795	2410002F23Rik
0.2058	6.731	0.05795	Adam10
0.4698	7.189	0.05795	Mid1
0.2574	4.458	0.05795	Mterf3
0.2186	8.368	0.05799	Ttc28
-0.3017	6.332	0.05799	Sh3bgrl
0.4051	2.904	0.05808	Col1a1
0.3593	4.394	0.05814	Gfod2
-0.4944	3.345	0.05817	Gabarapl2
-0.7449	1.177	0.05817	Tdrd12
-0.5596	3.216	0.0583	Rpl7
0.2121	8.051	0.0583	Osbpl9
-0.6639	2.288	0.0583	Gm12963
0.4871	4.153	0.05832	1700028E10Rik
0.242	5.127	0.05832	Zfp866
-0.3891	4.364	0.05832	Septin6
0.6538	1.478	0.05835	Pcdhb12
0.2578	5.76	0.05836	Osbpl11
-0.2192	6.071	0.05854	Uqcrc2
-0.4272	3.575	0.05854	Cbr1
-0.3004	4.001	0.05854	Eloa
-0.299	5.606	0.05854	Clip3
-0.4499	6.103	0.05854	ENSMUSG00000120081
0.2273	6.304	0.05854	Zhx1
0.2058	7.035	0.05868	Wac
0.2604	5.342	0.05879	Pcbd2
-0.6648	5.963	0.05879	Slc35f1
0.5866	3.647	0.05881	Slc16a9
0.9394	2.322	0.05881	Prag1
0.6957	1.943	0.05881	Acss2os
-1.109	0.8267	0.05881	Apoc1
1.04	2.235	0.05881	Rgs2
0.1976	6.97	0.05885	Zmym2
-0.2918	3.998	0.05892	Srprb
-0.745	6.532	0.059	Tnfaip8
0.3866	3.572	0.059	Taf1a
0.407	8.88	0.05915	Fam20a
0.313	4.786	0.05915	Myef2
-1.134	0.02433	0.05919	Gm47076
0.7557	3.272	0.0592	Slc7a5
-0.36	3.844	0.05924	Scamp3
0.325	5.847	0.05929	Kantr
-0.3593	3.762	0.05929	Gpx4
-0.8841	4.111	0.05929	Bcas1os2
0.2629	5.678	0.0593	Nfatc3
0.5208	3.635	0.05934	Shank2
0.3154	5.037	0.05935	Hmgxb3
0.3549	5.012	0.05937	Bcar1
-0.4548	3.114	0.05943	Iglon5
-0.2875	4.759	0.05944	Cox6c
-0.3104	3.988	0.05944	Mtfr1l
-0.6683	1.817	0.0595	Pycrl
0.4473	5.371	0.0595	Runx1t1
0.4952	4.2	0.0595	Stat2
0.8521	1.486	0.0595	Gm14762
-0.453	3.427	0.0595	Ppp1ca
0.4748	4.109	0.0595	Rapgef4
-0.7473	1.83	0.0595	Selenom
-0.385	3.429	0.0595	Ikzf5
-0.6173	2.634	0.0595	1600012H06Rik
0.3173	3.916	0.0595	Cep135
-0.43	3.139	0.0595	Agtrap
-0.215	6.2	0.0595	Abhd6
-0.8003	8.24	0.05973	Il31ra
0.2158	7.966	0.05981	Nsd1
-0.4098	2.806	0.05981	Elp6
0.5484	3.687	0.05982	Zfp862-ps
0.2576	4.98	0.05983	Eif4enif1
0.4069	5.057	0.05989	Alpl
-0.4866	5.884	0.06003	Brinp2
0.6514	1.832	0.06004	Tgfbr3l
1.017	1.094	0.06004	Cacna1e
-0.6291	1.716	0.06009	Zfp941
0.2456	5.913	0.06009	Parn
-0.9051	1.087	0.06021	Pigyl
1.411	1.729	0.06028	Parp14
1.692	1.509	0.06032	Pou2f2
0.7133	1.616	0.06043	ENSMUSG00000121456
-0.7129	1.563	0.06048	Zc3h10
-0.2945	5.692	0.06048	Pmp22
-0.3239	3.797	0.06057	Pip4k2c
-0.372	3.695	0.06064	Lamtor5
0.9474	4.851	0.06071	Cdh22
-0.3991	4.677	0.06082	F630040K05Rik
0.2659	7.52	0.06082	Ctdspl
-0.3177	4.467	0.06082	Zfp354c
-0.5498	2.028	0.06082	Churc1
0.2926	4.557	0.06095	Gnl2
-0.4003	4.45	0.06095	Tmem50a
0.2356	5.927	0.06149	Strn
-0.3379	4.212	0.06155	Siae
0.2559	5.645	0.06164	Fbxl5
-0.2244	5.72	0.06172	Macrod1
-0.464	3.022	0.06175	Tmem60
-0.5284	2.952	0.06176	Mgat2
-0.2321	7.694	0.06176	Csrp1
-0.8004	1.189	0.06187	Thtpa
-0.3559	3.337	0.06187	Rplp2
-0.6172	2.327	0.06188	Mrpl28
-0.3274	3.413	0.06198	Gm48321
0.2189	6.139	0.06203	Efr3a
0.2674	6.164	0.06203	Tbc1d22a
-0.4853	2.562	0.06203	Hic2
0.3457	6	0.06203	Echdc1
0.3405	5.329	0.06208	Fam117b
-0.6123	1.435	0.06209	Mrps12
-0.478	5.252	0.06211	Masp1
0.2352	5.899	0.06217	Commd10
-0.2806	4.882	0.06218	Ctbs
0.2147	6.01	0.06221	Ube2d2a
-0.2661	5.047	0.06221	Srpr
-0.7365	4.224	0.06221	Retsat
-0.4124	3.627	0.06228	Hint1
-0.6241	2.866	0.06231	Rab3b
-0.6093	2.642	0.06231	Ndufa2
0.2571	5.986	0.06231	Nemf
0.2821	4.373	0.06231	Rnpep
0.5135	3.324	0.06231	Gm26542
0.2023	6.039	0.06231	Ccar1
-0.4546	4.983	0.06231	Lxn
0.9678	0.5015	0.06231	Lonrf1
-0.422	3.872	0.06231	Mapk8ip1
-0.5924	2.022	0.06231	Rpl15
-0.6907	4.745	0.06234	Creb5
-0.7251	8.518	0.06234	Dcc
-0.26	5.362	0.06249	Gclc
-0.3285	4.101	0.06268	4930570B17Rik
0.9717	1.748	0.06297	Shank3
-0.3192	3.709	0.06305	Rpl11
0.8461	0.871	0.06306	4933433G19Rik
0.2032	7.264	0.06321	Bclaf1
-0.2815	4.357	0.0633	Nap1l5
0.2978	4.914	0.0633	Polk
0.7343	8.11	0.06338	Srgap1
-0.2798	4.673	0.06343	Cyp20a1
0.1855	7.201	0.06344	Cdk13
-0.3941	3.736	0.06348	Hexim1
0.8834	1.201	0.06353	Mfsd6
0.1966	6.348	0.06353	Ankfy1
-0.2898	4.373	0.06356	Pigp
1.1	0.7241	0.06357	Lrriq1
-0.323	5.908	0.06366	Cnbp
-0.6068	2.509	0.06371	Gm26885
0.2136	7.351	0.06372	Nbeal1
0.3154	6.7	0.06372	Rab11fip4
0.2754	7.687	0.06372	Dlg1
-2.993	-0.4741	0.06372	Gm6645
0.4073	5.557	0.06372	Zdhhc14
0.4669	2.29	0.06372	Ptpn22
-0.2392	7.154	0.06377	Dag1
0.2895	5.319	0.06402	Mbip
0.2644	5.892	0.06402	Sfmbt1
-0.3402	4.721	0.06402	Ndufs2
-0.2009	7.232	0.06402	Rnf13
-0.4537	2.717	0.06402	Zfp428
-0.3961	3.233	0.06402	Gm38304
-0.5271	2.2	0.06423	Emc6
-0.4261	6.182	0.06429	Lhx2
-0.2855	5.932	0.06444	Pfn2
-0.3547	3.385	0.06447	Tmem208
-1.335	0.1899	0.06447	Rhcg
0.287	7.014	0.06447	Sat1
0.2471	5.182	0.06462	Ip6k2
0.2228	6.807	0.06466	Nlk
-0.2299	5.208	0.06466	Dld
0.3107	4.727	0.06466	Nphp1
-0.3249	9.535	0.06476	Ctnna2
0.987	0.9753	0.06477	Chd5
-0.2219	6.833	0.06477	Lmbrd1
0.9953	-0.01055	0.06481	Gm49519
0.5454	5.089	0.06481	Smoc1
0.2701	4.979	0.06482	Cep192
0.2283	5.773	0.06483	Ctcf
0.2391	6.415	0.06501	Xrn2
-0.4801	2.456	0.06501	Gm5441
-0.1883	7.599	0.06501	Lamp2
0.1995	6.702	0.06506	Epn2
0.3332	4.298	0.06515	Cryl1
0.191	7.719	0.06549	Zfp638
0.218	7.573	0.06554	Samd4
0.8194	0.6514	0.06556	Zfp456
-0.3931	2.958	0.06558	Sema3c
0.7881	0.6655	0.06558	Ppcs
-0.2999	4.903	0.06558	Acp2
-0.3865	4.791	0.0656	Ednra
-0.2526	4.532	0.0656	Klhdc2
0.3614	6.049	0.0656	Senp1
-0.4821	2.688	0.06581	Zfp61
0.2938	4.439	0.06591	Ccdc77
-0.365	4.239	0.06608	Atp5g3
-0.2569	4.986	0.06608	Atp5j
-0.2277	7.628	0.06608	Soat1
0.8934	0.4037	0.06608	Gm17092
-0.5178	2.019	0.06608	Glrx5
-0.5756	2.041	0.06608	Thnsl2
-0.707	1.736	0.06608	Timm13
1.247	1.852	0.06608	Cdk6
0.2535	7.875	0.06608	Eda
0.1873	7.031	0.06608	Atp2c1
0.7921	2.29	0.06608	2810032G03Rik
-0.5177	2.743	0.06615	Amigo2
-0.5269	2.179	0.06615	Ccdc107
-0.5517	2.86	0.06615	B3gat2
-0.315	3.645	0.06639	Prelid3b
-0.4339	3.215	0.06646	Slc35b2
-0.4553	8.501	0.06646	Gabra2
0.509	6.447	0.06646	Sorbs2
0.4653	3.16	0.06646	Bbs5
-0.5484	2.602	0.06646	Mrpl52
0.1991	6.741	0.06649	Cnot1
-0.5934	2.141	0.06653	Gins4
-0.7363	1.116	0.06655	Gm49405
0.2413	7.464	0.06657	Lims1
0.2802	4.439	0.06657	Zc3h3
-0.2532	6.306	0.06657	Hsd17b12
-0.3827	3.002	0.0666	Rpl9
0.225	5.912	0.06664	Tra2b
0.3318	7.61	0.06677	Aff1
-0.4104	3.201	0.06678	Ankrd50
-0.243	5.553	0.06682	Ganab
-0.4191	2.97	0.06682	Ndufa3
-0.2949	3.773	0.06682	Dmac2
-0.3509	5.416	0.06682	Man2a2
-0.1877	7.688	0.06682	Elp4
0.2812	5.193	0.06682	Slc38a6
-0.3	4.775	0.06682	Creg1
0.4889	4.927	0.06705	Brsk2
-0.3239	3.319	0.06705	Vma21
-0.9435	1.056	0.06705	Tmub1
-0.3602	3.853	0.06727	Klhl11
-0.4977	2.658	0.06727	4930505G20Rik
-0.273	4.867	0.06728	Ergic3
0.4293	3.279	0.06728	Numbl
-0.3441	6.457	0.06729	Ptprf
-0.401	3.565	0.0673	Cd151
-0.5566	2.646	0.0673	Ddt
-0.2354	8.238	0.0673	Fermt2
0.6227	3.813	0.06751	2900026A02Rik
1.242	3.149	0.06765	Grm4
-0.3069	5.119	0.06767	Sec61a1
0.2433	5.552	0.06778	Lrrc28
0.9032	2.987	0.06815	Stxbp5l
-0.3139	3.369	0.06818	2310022A10Rik
0.2695	5.508	0.06821	Pdss1
0.607	2.02	0.06821	1700086O06Rik
0.3317	3.854	0.06821	Zbed4
0.2399	5.82	0.06821	Ddi2
-0.2592	5.532	0.06821	Lasp1
-0.4885	4.557	0.06821	Lrtm2
-0.4482	2.855	0.06821	Trappc4
0.2664	9.496	0.06821	Tjp1
-0.7655	1.166	0.0683	Art3
[truncated: 55,011 more rows]

## Sheet: DE-1_Astrocyte
logFC	AveExpr	p_val_adj	gene_names
5.659	0.7382	3.731e-05	Cldn34c1
2.036	4.737	3.731e-05	4833420G17Rik
5.032	-0.6981	5.1e-05	C130046K22Rik
2.974	5.89	0.0002507	Cacna1d
-1.465	6.107	0.0003408	Igfbp2
-1.404	5.097	0.0005111	Cmtm5
0.9891	6.371	0.0005111	Btaf1
-1.151	7.095	0.0005111	Tspan3
-1.253	11.06	0.0005111	Apoe
1.971	3.937	0.0005111	Cmya5
0.895	8.367	0.0005111	Eif4g3
-1.875	3.217	0.0005111	Rarres2
-2.68	5.25	0.0005111	Ubc
-1.092	4.65	0.0005111	Cyc1
-1.207	5.679	0.0005111	Slc22a17
-1.11	4.629	0.0005111	B4gat1
1.218	5.499	0.0005111	Slc25a21
-1.051	5.616	0.0005111	Tpi1
-1.006	6.051	0.0005111	Tmem51
-1.266	3.702	0.0005111	Pja1
-2.299	2.35	0.0005297	Pcdh18
-1.064	6.439	0.0006056	Smpdl3a
-0.8295	8.29	0.0007281	Kcnj10
-1.443	4.912	0.0007281	Chchd10
-1.121	5.906	0.0007332	Slc25a5
-1.081	5.429	0.0007384	Tmco1
1	9.436	0.0007384	Rgs7
-1.233	6.863	0.0007792	Slc25a4
-1.151	5.452	0.0008365	Selenos
-1.23	5.033	0.0008365	Nox1
-0.9005	5.005	0.0008365	Slc14a1
-0.9304	6.317	0.0008365	Elovl2
-0.9209	6.087	0.0008365	Mmp14
1.267	3.54	0.0008365	Cep85
0.8095	6.182	0.0008365	Acsl4
-1.231	5.067	0.0008365	AW047730
0.7593	7.597	0.0008365	Pan3
0.9159	7.725	0.0008561	Syn2
-1.187	4.709	0.0009169	Ndufb9
-0.7822	6.284	0.0009169	Cfl1
-1.403	3.398	0.0009169	Arxes2
-0.8886	6.596	0.0009169	Acadl
-1.329	4.325	0.0009169	Chchd2
-1.479	3.395	0.0009169	Igsf1
-0.7987	8.628	0.0009169	Timp3
-4.859	-0.3605	0.0009169	Atp6ap1l
-1.045	9.169	0.0009169	Prnp
-0.948	7.664	0.0009169	Syt11
-0.655	6.484	0.0009169	Spacdr
-0.9507	7.212	0.0009169	Hspa8
-0.8559	6.765	0.0009169	Tmem59
2.822	2.202	0.0009169	Gadl1
-0.8986	7.404	0.0009169	Calm1
-1.323	3.682	0.0009169	Bmyc
-0.9685	5.842	0.0009169	S100b
-0.7738	6.047	0.0009169	Tmem229a
-1.164	3.875	0.0009169	Mgst1
0.904	5.547	0.0009586	Ralgps2
0.6473	7.074	0.0009611	Slmap
-0.885	6.571	0.001104	Prdx1
-0.836	6.747	0.001104	Cd63
-1.035	3.794	0.001145	Slc35g2
-0.9692	4.986	0.001145	Pcdhga12
-1.29	7.272	0.001145	Gstm1
-1.28	3.623	0.001146	Uqcr10
-1.046	7.431	0.001175	Cldn10
0.6402	6.194	0.001175	Pspc1
1.119	3.381	0.001175	Dusp12
-1.084	3.612	0.001184	Mrps14
-0.9629	7.287	0.001188	Atp5b
-1.131	4.08	0.001188	S100a13
-0.9611	5.077	0.001188	Selenok
-1.278	3.09	0.001188	Hsd17b10
-1.021	5.091	0.001188	Lgalsl
-1.114	5.784	0.001188	Mdh1
0.6093	6.439	0.001188	Hnrnph1
0.9294	4.444	0.001188	Cdyl2
-1.034	7.479	0.001188	Myorg
-0.8141	5.861	0.001188	Pmm1
-0.7237	6.328	0.001188	Kcna2
-0.822	7.878	0.001201	Gabrg1
-0.792	6.977	0.001201	Hspa5
-2.506	1.595	0.001201	Gm18103
-0.9071	7.228	0.001201	Itm2c
-0.7227	5.437	0.001221	Gm11149
-1.213	4.076	0.001233	Pcdhgb7
-0.7853	5.992	0.001233	Clptm1
-0.9176	5.985	0.001233	Rpn1
-0.8468	8.502	0.001233	Tril
-0.8326	4.744	0.001269	Hspa13
-1.22	3.473	0.001297	Ubiad1
1.466	5.435	0.001299	Eya4
-0.7007	5.562	0.001299	Mdh2
-1.27	4.431	0.001299	Uqcrfs1
-0.8693	8.76	0.00131	Aqp4
-0.6625	5.464	0.00131	Anxa5
-0.9514	4.828	0.00136	Cldnd1
2.086	1.88	0.001413	4933427I22Rik
-1.218	4.703	0.001414	Tmem176a
-1.058	5.377	0.001425	Enpp5
-0.82	5.134	0.001425	Echs1
-0.8193	5.953	0.001425	Cat
-0.8175	5.096	0.001462	Acaa2
-0.8944	4.381	0.001462	Selenon
-1.047	10.29	0.001462	Gja1
-0.599	7.834	0.001533	Hacd3
-0.6895	5.586	0.001533	Spcs2
0.7364	5.772	0.00154	Bcor
-1.762	3.007	0.00154	Tmem35a
-0.8874	6.542	0.001554	Rhobtb3
-0.6901	7.337	0.001554	Gprc5b
-1.288	2.833	0.001554	Acot1
-1.587	3.764	0.001554	Uqcr11
-0.826	6.85	0.001554	Rcn2
-0.862	7.252	0.001559	Stt3b
-0.9663	4.265	0.001561	Xbp1
-1.278	4.031	0.001561	Tmem115
0.6506	7.993	0.001561	Kansl1
-0.9409	4.027	0.001561	Cops6
0.6995	8.451	0.001561	Magi1
-0.9279	4.711	0.001561	Manf
0.6431	5.577	0.001561	Aatf
1.216	2.769	0.001561	Radil
0.5741	7.205	0.001561	Lrch3
-1.244	4.256	0.001561	Cbr3
-1.024	7.153	0.001561	Gapdh
-0.96	6.366	0.001561	Actg1
0.96	4.047	0.001561	Tatdn3
-0.997	5.043	0.001561	Atp5h
-0.9939	5.015	0.001569	Cox6c
-0.7047	5.619	0.001569	Magt1
1.476	3.581	0.001569	Gm36723
-1.116	6.321	0.001581	Eif1
-0.9172	16.36	0.001581	Rn18s-rs5
-1.125	5.209	0.001595	Smpd1
-0.9676	4.982	0.001628	Cox7b
-0.7851	5.178	0.001632	Atp5j
-0.6368	8.175	0.001632	Ednrb
-1.045	4.207	0.001634	Pgp
-1.248	5.936	0.001651	Klhdc7a
0.8849	5.946	0.001677	Mrtfa
-1.082	4.591	0.001677	Enho
-0.7655	6.963	0.001677	Atp5a1
-1.266	3.931	0.001677	Crip2
-0.9952	4.743	0.001677	Ndufa4
-1.164	5.282	0.001697	Cox8a
1.019	7.305	0.001764	Cmip
0.6128	7.712	0.001764	Pals2
-0.6768	5.558	0.001764	Wbp2
0.623	5.428	0.001764	Cramp1
-0.8647	4.485	0.001764	Cstf2
-0.7486	5.596	0.001764	Fxyd1
-0.7338	6.248	0.001764	Pdha1
-0.772	7.048	0.001802	Laptm4a
-0.9677	6.809	0.001812	Arl6ip1
-0.603	6.712	0.001812	Ece1
0.6876	6.08	0.00182	Ssbp3
-0.8695	5.297	0.00182	Serpinh1
-0.7615	4.14	0.001836	Dynlrb1
-1.199	5.365	0.001873	Emc7
-0.8121	5.634	0.001886	Phyh
-0.996	4.715	0.001893	Fbxo2
-0.9567	5.238	0.001935	Tmem176b
0.7297	7.255	0.001976	Med13l
-1.033	6.777	0.001992	Sox2
-1.007	4.582	0.00205	Pgap4
-0.9929	4.76	0.002069	Irf2bpl
-1.102	3.897	0.002069	Gsta4
-0.949	7.297	0.002069	Fjx1
-0.8455	5.818	0.002069	Amer2
-0.8909	6.319	0.002069	Nkain4
1.071	4.112	0.002075	Myo16
-0.7695	5.984	0.002075	Aldh2
-0.7512	4.962	0.00208	Fkbp3
-0.8155	4.398	0.00208	Hsbp1
0.585	8.189	0.00211	Zfand3
-0.9273	7.837	0.002117	Cxcl14
-0.8737	4.888	0.002117	Cnih1
0.5751	7.383	0.002117	Herc2
-0.9599	4.583	0.002158	Atp5g3
-0.9708	3.528	0.002158	Pla2g12a
-0.8472	3.976	0.002158	Ndufb8
-0.8888	5.959	0.002162	Slc2a1
0.7618	5.281	0.002162	Cep120
-0.6563	6.172	0.002163	Pnkd
-0.9194	4.511	0.002163	Emc10
-1.231	3.725	0.002163	Cd320
-0.7958	4.372	0.002232	Fndc4
-0.7011	5.324	0.002247	Gpr37
-3.432	1.783	0.002247	Gm6166
0.5732	6.277	0.002247	Rnf111
-1.151	9.68	0.002247	Mfge8
-0.9746	3.837	0.002284	Smdt1
-1.145	4.444	0.002293	Hes1
0.94	6.078	0.002293	Arsb
-0.9517	7.386	0.002293	Adgrg1
-1.011	5.121	0.002293	Tst
2.282	1.927	0.002305	Extl1
-0.9013	6.968	0.002305	Aplp1
-0.6339	6.349	0.002329	Chst1
-0.9683	5.881	0.002329	Pygm
-0.951	3.775	0.002329	Gdf10
-1.188	3.988	0.002329	Rlbp1
-0.7399	5.531	0.002329	Tfrc
-0.6316	7.867	0.002329	Phyhipl
0.7201	6.391	0.002341	Dpyd
-0.9335	5.191	0.002348	Oat
-1.398	3.488	0.002348	Atp5k
-1.105	5.623	0.002348	Cox4i1
0.5661	6.186	0.002348	Cdyl
-0.5082	7.869	0.002348	Adcyap1r1
-1.094	5.07	0.002348	Ubb
-1.202	2.568	0.002348	Tomm22
-0.9385	6.885	0.002348	Nme7
-0.6884	5.808	0.002348	Kbtbd11
-0.7846	6.075	0.002348	Saraf
0.5593	5.681	0.002358	Pfkfb4
-0.7989	5.334	0.002368	Ginm1
-0.6274	6.613	0.002407	Cadm4
-0.896	5.837	0.002407	Papss2
-0.5386	6.663	0.002407	Hk1
-0.903	6.121	0.002412	2900052N01Rik
0.6179	6.756	0.00242	Ddo
0.5091	7.953	0.002447	Zcchc7
-1.11	4.422	0.002448	Cisd1
0.4867	7.045	0.002448	Cnot2
-0.9059	4.378	0.002448	Dynll1
-0.6568	7.277	0.002448	Dag1
-0.6768	7.34	0.002455	Slc1a4
-0.908	5.014	0.002469	Fabp7
1.127	7.186	0.002511	Agmo
-0.7725	5.169	0.002511	Slc39a10
-0.6116	5.284	0.002541	Amph
0.5705	6.241	0.002541	Luzp1
-0.7965	4.604	0.002541	Idh3g
0.5946	6.071	0.002545	Kif13b
-1.145	4.356	0.002565	Nat8f4
-0.8257	8.357	0.002567	Igsf8
0.6319	6.814	0.002568	Ide
0.4849	6.316	0.002574	Xpo1
-1.301	12.26	0.00273	Lars2
0.7876	4.508	0.002787	Mob3b
-0.7748	4.929	0.002802	Tspan31
-1.103	6.744	0.002818	Aldoa - ENSMUSG00000030695
-0.6409	6.364	0.00285	Sqstm1
-0.7582	6.604	0.00285	Mid1ip1
-0.8601	4.336	0.00285	Gdpd2
0.6747	7.451	0.00285	Irf2
-1.009	3.465	0.002882	Ckap4
0.5221	6.73	0.002882	Kdm2a
-1.107	4.33	0.002882	Lrrn1
0.4864	7.013	0.002882	Gse1
-1.191	3.933	0.002882	Cox5b
0.5686	6.632	0.002882	Stx8
-0.9865	7.001	0.002882	Grina
-0.7051	7.269	0.002882	Ldhb
-0.7424	4.255	0.002882	Pgrmc1
-0.5891	6.663	0.002899	Phgdh
0.6556	6.275	0.002913	Sik2
-1.706	3.369	0.002961	Gm20083
-0.7676	8.627	0.002961	Prdx6
0.5373	6.907	0.002991	Vps13c
-0.582	6.073	0.00306	Reep5
-1.074	3.79	0.003074	Gm47469
4.425	-0.2381	0.003074	Zfp125
-1.263	3.789	0.003074	Olig1
-0.893	4.187	0.003196	Atp5j2
-0.5138	7.227	0.003196	Gpi1
1.229	1.927	0.003221	Agpat4
-0.6899	5.659	0.003249	Sdhb
-0.8085	5.115	0.003252	Kdelr1
-0.9933	4.007	0.003252	Ptpmt1
-1.02	3.808	0.003252	Ndufa5
-0.7712	7.913	0.003307	Serinc1
-0.6871	4.284	0.003348	Rbbp9
-0.8442	5.243	0.003348	Jag1
-1.329	2.36	0.003376	Tceal3
0.7734	6.057	0.003376	Rps6kc1
-0.6389	7.405	0.003383	Abhd3
-0.7887	4.431	0.003383	Cox7a2
-0.5012	6.18	0.00339	Tmem30a
0.5046	6.579	0.003424	Cop1
-1.185	3.468	0.003428	Ndufs6
0.5306	5.621	0.003428	Supt20
0.706	5.778	0.003428	Sfmbt1
-1.402	3.914	0.003428	Adora2b
-0.7396	5.899	0.003465	Pttg1ip
-0.9685	5.373	0.003465	Ndufc2
0.7455	7.284	0.003465	Mxi1
0.5149	6.623	0.003465	Mark2
-0.7301	5.9	0.003521	Emc3
-0.5905	7.447	0.003521	Pcdhgc4
0.9959	4.274	0.003521	Spata6
-1.125	2.705	0.003521	Mrpl28
-0.774	6.832	0.003521	Eno1
1.067	5.402	0.003521	Banp
-1.027	4.017	0.003521	Rraga
-0.7587	9.189	0.003521	Scg3
0.5864	7.262	0.003521	Rsrp1
-0.5847	6.327	0.003521	Golm2
-0.7075	6.149	0.00354	Oaf
-0.7788	4.283	0.00354	Edf1
0.9692	5.882	0.003564	Adamts6
-1.169	3.934	0.003567	Rabac1
0.5721	7.102	0.003567	Smg1
-0.8304	4.666	0.003567	Cd302
0.482	6.249	0.00365	Dicer1
-1.321	4.126	0.003655	Mdk
-0.7242	9.032	0.003658	Cspg5
-0.4588	7.055	0.003694	Jam2
-2.348	0.7915	0.003694	Apoc1
-1.04	5.258	0.003791	S100a1
-3.752	1.583	0.003791	Cfap77
-1.182	2.948	0.003791	Tmem147
-1.022	7.064	0.003791	Pcdhgc3
-0.9893	3.767	0.003791	Fkbp2
-1.063	5.192	0.003791	Lxn
-0.7995	4.64	0.003791	Atraid
-0.5596	6.315	0.003791	Wscd1
-0.6903	4.195	0.003791	Slc25a20
1.448	3.311	0.003791	Rras2
-0.8915	4.871	0.003791	Prdx2
1.205	4.198	0.003791	Col23a1
0.6144	7.097	0.003842	Acer3
-0.7015	4.479	0.003845	Atp5md
-0.6737	5.219	0.003872	Laptm4b
-1.049	2.335	0.003891	Timm13
-0.8295	4.318	0.003924	Mmgt1
0.7284	7.69	0.003937	Prkca
-0.8586	9.775	0.003937	S1pr1
0.5004	5.993	0.003937	Tcerg1
0.5342	9.392	0.003937	Lncpint
-0.5452	8.117	0.003937	Slc38a3
-0.7126	4.893	0.003937	Cox7c
-0.7017	8.699	0.003945	Serpine2
-0.6696	6.388	0.003977	Cyp2d22
0.5133	7.175	0.003996	Zfp516
0.5845	8.12	0.004011	Smyd3
-1.123	2.471	0.004043	Prps1
-0.7007	5.391	0.004043	Hspd1
-1.102	3.631	0.004045	Cend1
-0.6963	5.361	0.004045	Emc1
-1.185	3.547	0.004045	Gm21988
0.5339	6.676	0.004045	Smurf1
-0.6321	5.334	0.004045	Dazap2
-0.5264	7.804	0.004045	Notch1
-0.9303	4.429	0.004045	Paqr4
-0.7843	5.367	0.004045	Rdh11
-0.6366	5.101	0.004045	Apln
-0.92	5.365	0.004045	Tmx2
-0.9639	4.949	0.004045	Fam181b
0.6783	5.557	0.004051	Map3k1
-0.686	6.156	0.004065	Hgf
-0.6728	6.178	0.004102	Pfn2
0.7333	4.268	0.004102	Ddx31
0.5359	5.993	0.004126	Med27
-0.5562	9.985	0.004126	Slc6a11
0.4323	7.445	0.004141	Ppp1r12a
0.7979	5.713	0.004156	Pot1b
-0.9237	3.272	0.004161	Irf2bp1
0.6001	5.298	0.004161	Rcor1
-0.743	11.98	0.004161	Atp1a2
0.5254	4.96	0.004171	Ppp4r2
-0.6909	4.695	0.004171	Hadh
-0.7081	6.887	0.004171	Pcdh1
2.07	2.935	0.004175	6430590A07Rik
0.5047	6.604	0.004188	Nlk
-0.7073	5.05	0.004188	Prpf19
0.5955	10.5	0.004188	Pitpnc1
-0.5408	6.504	0.004188	Tmed10
-0.8709	3.953	0.004213	Cbr1
0.6016	6.779	0.004213	Shroom3
1.479	2.314	0.004213	Col1a2
-0.7746	5.063	0.004235	Pcyox1
-0.5314	7.636	0.00429	Eif4g2
-0.8462	5.191	0.00429	S100a16
0.5024	6.785	0.00429	Adam10
-0.7364	6.769	0.00429	Nr1d1
-1.248	6.352	0.00429	Fzd2
-0.9812	4.847	0.00429	Nrarp
-0.7314	5.06	0.00429	Map1lc3b
-0.7521	4.886	0.00429	Ikbip
-0.6655	4.966	0.00429	Pgk1
-0.8176	5.262	0.004297	Flrt1
0.5337	5.363	0.004307	Gtf2f2
-1.033	3.756	0.004307	Ssr2
-4.961	0.8875	0.004351	4930519F16Rik
-1.066	4.637	0.004359	Pou3f4
-1.084	3.636	0.004367	Nme2
1.329	5.651	0.004367	Nsdhl
0.5129	5.523	0.004408	Rbm28
0.6067	6.222	0.004414	Rapgef6
0.6465	4.378	0.004442	Zfp746
-0.7847	4.356	0.004444	Cox6b1
0.5098	6.17	0.004467	Rimklb
-0.7694	3.953	0.004467	Cacybp
-0.6645	8.207	0.004481	Pcdh10
-0.7513	11.37	0.004481	Sparcl1
0.5692	6.641	0.004481	Susd6
-0.8661	4.961	0.004481	Gabarapl1
-0.7245	4.878	0.004481	Sdf2
1.255	2.363	0.004481	Gm4107
-0.7604	4.231	0.004481	Sigmar1
0.5678	7.881	0.004481	Ppp1r9a
-1.061	9.12	0.004481	Gpr37l1
-0.7205	5.504	0.004481	Pdpn
-0.7059	3.853	0.004505	Cops7a
-1.021	3.76	0.004516	Ndufb7
-1.106	5.924	0.004525	Btbd17
-1.061	2.699	0.004529	D17H6S53E
0.4762	7.626	0.004529	Herc1
-0.701	5.461	0.004532	Plaat3
0.5425	5.957	0.004565	Fbxw7
-0.6763	4.329	0.004565	Ptov1
0.4823	7.007	0.004565	Sgms1
-0.8044	4.33	0.004565	Extl2
-1.28	2.83	0.004577	Mrps34
-0.8992	3.534	0.00459	Ubxn8
1.657	8.92	0.00459	Lrmda
-0.8382	4.107	0.004598	Enpp4
-0.8313	6.886	0.004614	Epha5
0.457	6.025	0.004616	Taf3
-0.6568	5.983	0.004616	Ccdc190
-0.6848	5.013	0.004628	Jun
-0.7582	5.957	0.004632	Dbi
0.7222	6.441	0.004647	Parp8
-0.6348	5.914	0.00465	Slc48a1
0.5748	5.447	0.004683	Ubp1
-0.7817	3.893	0.004683	Park7
-1.077	4.696	0.004714	Hspa2
1.07	3.096	0.004743	Hoga1
-1.304	2.052	0.004743	Cdr1os
-1.122	9.983	0.004765	Cst3
-0.5878	6.088	0.004765	Celsr2
0.7364	6.295	0.004765	Man1a2
-0.6651	6.703	0.004765	Tmem106b
-1.226	4.408	0.004765	Ndufb10
-0.5732	6.993	0.004765	Gnai2
-0.5886	6.164	0.004765	Lap3
-0.7478	4.694	0.004765	Tmem9b
-1.276	2.73	0.004765	Gm54867
-0.638	5.211	0.004765	Atp6ap1
-0.4586	6.577	0.004777	Hadha
-1.194	2.596	0.004842	Fzd9
-0.5405	7.694	0.004847	Aplp2
-0.6903	4.583	0.004847	Gucy1b1
0.9062	4.661	0.004853	Brsk2
-0.8792	5.026	0.00486	Ppib
0.6525	3.986	0.00486	Ccdc28b
-0.7895	4.312	0.00486	Psma7
-0.7757	3.972	0.00486	Chmp2a
-0.6915	5.175	0.004862	Alg2
-0.7172	4.501	0.004862	Mpdu1
-0.8642	3.376	0.004862	D8Ertd738e
0.6334	6.653	0.004862	Gpcpd1
-0.8406	4.851	0.004862	Atp5o - ENSMUSG00000022956
-0.6717	3.853	0.004862	Rpl31
-0.8049	4.129	0.004862	Maged2
-0.5546	7.876	0.004862	Csrp1
-1.112	3.384	0.004862	Mif
0.9198	4.105	0.004862	Ppp1r13b
0.6128	5.291	0.004862	Trp53inp1
-1.158	3.827	0.004862	Pcdhga11
0.5726	4.51	0.004862	Pip4k2b
-1.045	6.942	0.004862	Vcam1
-0.5711	5.677	0.004897	Slc12a4
-0.6986	5.471	0.004915	Uqcrc1
-0.847	4.558	0.004943	Yipf3
0.7673	5.832	0.004958	Znrf1
-1.047	4.942	0.004973	Cox5a
0.4503	7.954	0.00499	Acaca
-0.6973	5.999	0.005033	Trib2
-0.9403	5.942	0.005033	Ubqln2
-0.8876	4.052	0.005046	Tm2d2
0.5395	6.415	0.005053	Aldh7a1
-1.065	2.741	0.005053	Chpf
0.762	4.142	0.005053	Acaa1a
-0.7607	5.265	0.005059	Atxn7l3b
-0.7822	6.111	0.005061	Timp4
0.4864	7.127	0.005134	Lcor
-1.422	1.92	0.005134	Rgs17
-1.038	3.28	0.005137	Fzd8
-0.7146	7.36	0.005137	Slitrk2
-0.7998	5.492	0.005137	Dnajb9
1.484	2.643	0.005149	Gm7240
-1.313	3.244	0.005155	Ndufb11
0.5757	5.371	0.005178	Fam117b
-0.902	4.518	0.005235	9630028H03Rik
-0.4263	7.326	0.00524	Dner
-1.419	2.717	0.00524	Cops9
-0.6779	4.696	0.005244	Smim10l1
0.7727	4	0.005258	Eml1
-0.6459	4.664	0.005259	Twf1
-0.6284	4.201	0.005259	Ppp2r5d
-0.4974	6.082	0.005259	Ddb1
0.7231	4.335	0.005262	Cep43
-2.637	0.4954	0.005311	Smim26
1.772	3.388	0.005386	Mpp7
-0.9432	2.975	0.005386	Pfn4
-1.49	7.062	0.005389	Mt3
-0.6188	4.332	0.005389	Kdelr2
-0.7056	4.815	0.005389	Slc35f6
-1.139	3.103	0.005389	Atp5e
-0.6415	5.262	0.005452	Abhd4
0.5948	7.892	0.005465	Aak1
-0.6435	4.187	0.005465	Gnpda2
0.4263	6.04	0.005465	Atp13a3
-4.743	0.2495	0.005465	Cacng6
0.4875	5.868	0.005482	Commd10
-0.9537	3.569	0.005495	Jagn1
-0.9102	3.837	0.005507	Cycs
0.4939	6.962	0.005507	Adcy9
-0.957	3.355	0.005515	Slc29a2
-0.9311	2.644	0.005515	Sec61b
-0.7894	10.73	0.005515	Glul
-0.7286	4.634	0.00552	Txndc15
-0.7867	4.975	0.005523	Nat8f1
0.4632	7.252	0.005524	Arih1
-0.7846	3.984	0.005534	Mydgf
-0.5926	4.474	0.005537	Snapin
-0.5501	4.61	0.005537	Cd38
-0.7372	7.437	0.005538	Lamp1
-0.7269	3.93	0.005538	Smim15
-1.032	2.931	0.005569	Higd2a
-0.8466	4.108	0.005569	Hexim1
-0.8	5.918	0.005601	Skp1
1.236	2.165	0.005601	Slc35d2
-1.318	1.667	0.005667	1810010H24Rik
0.4823	7.353	0.005692	Rbms1
0.4371	6.895	0.005692	Htt
-0.828	4.584	0.005731	Tmed4
0.6718	6.419	0.005744	Gpr158
-0.9331	6.312	0.005744	Omg
-0.7429	3.864	0.005744	Mrpl45
-0.6324	4.831	0.005744	Selenow
1.163	2.539	0.005744	Unc80
-1.278	2.345	0.005744	Mien1
-0.9041	4.662	0.005772	Mageh1
1.995	3.057	0.005787	Ulk4
0.966	2.622	0.005787	Rbbp8
0.5928	6.078	0.005787	Suz12
-0.8203	4.847	0.005787	Ephx1
0.9719	2.918	0.005787	Nudt6
0.4922	8.508	0.005793	Akt3
0.5924	4.642	0.005795	Brd9
-1.185	3.638	0.005814	Uqcrq
-1.134	2.729	0.005814	Tmie
-1.226	2.575	0.005869	Aurkaip1
-1.058	2.811	0.005869	Cideb
0.7224	7.161	0.005869	Dip2b
0.5863	6.033	0.005879	Lrrfip2
0.5006	6.131	0.005897	Mnat1
-0.6856	5.768	0.005952	Manea
0.4127	7.258	0.005952	Atxn7
-0.5156	4.735	0.005983	Rdh5
-0.5155	11	0.005983	Plpp3
-1.149	3.359	0.005983	Tceal8
-0.6424	4.452	0.006027	Rab1b
-0.7771	4.543	0.00604	Ndufv3
0.7477	6.686	0.00608	Rap1gds1
0.6773	6.392	0.00608	Far1
0.6177	5.521	0.00608	Mb21d2
0.4965	6.495	0.00608	Scfd2
-1.058	2.493	0.00608	Fkrp
-1.065	2.913	0.006105	Mfsd5
-0.7713	4.142	0.006121	Sfr1
-0.8735	6.157	0.006121	Slc6a9
-0.639	6.132	0.006195	Cnbp
0.9666	5.293	0.006195	Cep112
1.081	5.124	0.006198	Agbl4
0.3864	6.9	0.006208	Papola
0.4084	9.164	0.006208	Chd9
0.5283	5.621	0.006208	Spopl
-0.7833	3.452	0.006208	Terf2ip
-0.5971	5.265	0.006208	Eci1
-0.9	6.053	0.006208	Naaa
-0.4823	6.734	0.006244	Srebf1
0.4065	6.461	0.006244	Zc3h13
-0.6989	5.3	0.006297	Masp1
-0.7828	6.758	0.006298	Kcnj16
0.5893	7.733	0.00632	Etv6
-0.6918	4.91	0.006341	Pigt
-0.641	3.933	0.006343	Clpp
-0.5927	5.898	0.006343	Wnt7a
0.4728	5.297	0.006357	Ttc13
0.4382	6.04	0.006357	Ttll5
-0.6607	4.295	0.006373	Pyurf
-0.9066	3.544	0.006373	Zrsr1
-0.7465	5.176	0.006373	Ppia
0.4533	5.856	0.006373	Uimc1
-0.7161	3.872	0.006373	Tmem9
-0.6231	7.74	0.006373	Pou3f3
-0.5743	6.867	0.006399	Lfng
-0.5495	4.49	0.006429	Mboat7
-0.5344	9.224	0.006473	Bcan
-0.583	4.212	0.006473	Tmem43
0.4238	6.198	0.006473	Parg
1.219	4.597	0.006487	Ttc7
-0.5499	6.292	0.006488	Tkt
-0.4833	6.399	0.006488	Chst10
0.4781	7.802	0.00653	Chd7
-1.079	4.35	0.00653	Tuba4a
0.5886	6.105	0.006543	Rassf2
-0.7862	3.963	0.006543	Gatd3a
2.225	1.563	0.006543	Atp8b1
-0.5281	4.859	0.006543	Rxylt1
-0.5335	6.138	0.006543	Atad1
-0.5517	9.182	0.006543	Acsl6
-0.5527	5.271	0.006543	Gstz1
-1.025	3.304	0.00658	Tmem60
0.4734	6.251	0.00658	Prpf39
-0.9748	4.268	0.00658	Olig2
-0.7302	4.105	0.00658	Gpx4
-0.8141	3.882	0.00658	Aup1
-1.016	3.607	0.00658	Ndufc1
-0.499	6.458	0.00658	Ramp1
-1.504	4.898	0.00658	Zfp729a
0.798	4.681	0.006593	Rpgrip1l
-0.6373	5.125	0.00664	Yipf5
-0.6693	4.262	0.00664	Btd
1.129	5.904	0.00664	Arhgap39
0.8583	5.672	0.006645	Cerk
-0.9438	3.228	0.006646	C1qbp
0.501	6.267	0.006646	Creb1
-0.6754	6.655	0.006646	Tmed5
-0.6566	5.91	0.006646	Hsdl2
-0.7955	4.213	0.006646	Mmd
-0.539	5.19	0.006689	Kdsr
-1.512	1.911	0.006716	Tspan6
0.4601	5.897	0.006716	Rbpj
-0.5516	5.003	0.006748	Ermp1
-0.9232	2.966	0.006771	4632415L05Rik
-0.4497	5.703	0.006816	Selenot
-0.5994	4.476	0.006821	Cct5
0.5509	8.738	0.006821	Foxn3
-0.7297	4.055	0.006821	Amigo1
-0.748	3.8	0.006821	Ndufb6
-0.4905	7.758	0.006837	Tmem47
-0.467	8.72	0.006846	Astn1
-1.074	3.54	0.006851	Mfrp
-0.8046	3.96	0.006868	Gm31763
-0.9535	2.274	0.006876	Dpm2
-1.023	2.97	0.006876	Uqcc2
-1.27	3.599	0.006876	Inka2
-0.4578	6.523	0.006907	Sel1l
0.794	7.642	0.00692	Mitf
-1.042	10.06	0.00692	Clu
-0.8192	3.975	0.006934	Alas1
0.4018	7.136	0.006965	Arid2
-1.107	6.267	0.006975	Prelp
-0.9652	2.489	0.006975	Mrto4
0.7033	6.115	0.006975	Dnah7b
0.8002	8.215	0.007012	Mbnl1
0.6877	6.226	0.007013	Uvrag
1.271	2.147	0.007027	ENSMUSG00000120648
-1.175	3.241	0.007027	Angptl4
-0.5911	7	0.007027	Slc3a2
-0.885	2.7	0.007027	Cenpq
-0.9325	10.05	0.007027	Atp1b2
0.5699	5.876	0.007053	Senp1
-1.134	2.188	0.007053	Alkbh7
0.4672	5.43	0.007053	Hace1
0.6195	4.934	0.007053	Mta3
-0.7023	4.883	0.007065	Gnb2
-0.8938	4.073	0.007099	Bcas1os2
-0.72	3.871	0.00715	Rnf5
-0.4768	6.862	0.00715	Hnrnpk
0.6428	6.425	0.007189	Iqsec2
0.6988	4.379	0.007189	Hprt
-0.5747	4.233	0.007193	Pttg1
-0.9165	2.472	0.007233	Sdhaf4
1.305	2.88	0.007233	Cacna2d3
-0.9102	4.444	0.007233	H1f0
-0.6466	5.185	0.007233	Prkcsh
-0.6314	5.1	0.007233	Idh3a
-0.826	4.168	0.007233	Sfmbt2
0.9204	3.341	0.007233	Ninj2
0.4418	7.67	0.007233	Acap2
-0.7472	4.108	0.007233	Dhrs1
0.5145	5.434	0.00725	Parp6
-0.4958	6.623	0.00725	Psat1
-0.683	5.717	0.007261	Ctsf
-0.6097	6.223	0.007266	4933431E20Rik
-1.852	0.7986	0.007266	C1qtnf5
0.426	5.801	0.007266	Sec24a
-0.4965	7.014	0.007283	Tm9sf2
-0.6792	4.544	0.007283	Lamb2
0.4396	8.049	0.007299	Trak1
-0.8699	3.691	0.007299	Nudt19
0.5883	6.222	0.007299	Washc4
-0.5104	5.564	0.007299	Acadm
-0.4809	5.122	0.00733	Sar1b
0.4698	5.436	0.00733	Rcan1
-0.7869	5.194	0.007346	Pcbp1
-0.5388	6.563	0.007358	Tlr3
0.61	4.764	0.007366	Gas5
0.4341	6.669	0.00739	Mbtd1
0.6867	5.538	0.007398	B4galt6
-0.6837	5.402	0.007398	Mlf2
0.4647	6.828	0.007433	Srsf5
0.419	8.198	0.007435	Mbnl2
-0.672	5.394	0.007435	Brinp2
0.3937	6.121	0.007435	Csnk1g3
-0.6167	5.838	0.007435	Ghitm
-1.409	3.027	0.007435	Ddt
-0.7226	3.775	0.007515	Ndufb2
1.718	2.663	0.007519	Ddr2
-0.9931	3.559	0.007539	Smim45
0.5736	6.606	0.007642	Ksr1
0.5234	4.929	0.007642	Iqce
0.5741	5.162	0.007658	Ddx10
-1.4	1.385	0.007658	Cdkn2d
-0.5284	5.862	0.007678	Pkia
0.5194	6.548	0.007678	Cd2ap
-0.8648	3.529	0.007715	Psmb6
-0.5921	5.732	0.007715	Gclm
-0.849	4.657	0.007724	Degs1
-0.4789	6.212	0.007732	Abhd6
-0.4832	6.706	0.007732	Cyp2j6
-0.694	4.084	0.007736	Rpl24
-0.7143	5.081	0.007771	Bmp7
0.4307	6.028	0.007771	Stx18
0.4225	6.753	0.007774	Dcaf6
1.112	2.99	0.007786	Gm30075
-2.968	0.7924	0.007786	Acot12
-0.6495	5.966	0.00786	Epha4
-0.7571	4.081	0.007894	Ranbp1
-0.9265	3.296	0.007894	Csnk2b
0.5316	5.132	0.007894	Cdk11b
0.6007	5.863	0.007894	Map3k3
0.4178	5.772	0.007894	Zswim5
0.4376	7.346	0.007894	Psme4
-0.7522	3.401	0.007894	Rrs1
-0.5772	4.964	0.007894	Cdkn1b
-0.7434	3.705	0.007894	Cox17
0.646	7.438	0.007894	Map2k6
-1.075	2.859	0.007894	Micos13
-0.601	3.801	0.007894	Snrpa
-0.6962	7.008	0.007894	Car2
-0.7981	3.979	0.007894	Glmp
-0.9388	6.688	0.007919	Id2
-0.6115	4.599	0.00793	Tmem19
0.4421	6.822	0.007992	Tcf20
-0.9934	4.812	0.007992	Tubb4b
0.638	5.976	0.007992	Gca
0.5838	5.531	0.007992	Hycc1
-0.8702	3.837	0.007992	Ech1
-0.8643	3.433	0.007992	Mpst
-0.8455	4.821	0.007992	Ddost
-1.038	1.978	0.007992	Snrpd2
0.367	7.09	0.007992	Gigyf2
-0.8197	3.92	0.007992	Tprgl
-0.706	5.091	0.007992	Calm3
0.6412	4.854	0.007992	Phtf2
-0.528	5.105	0.007992	Ppm1k
-0.7628	3.524	0.007992	Tmem200c
0.3807	6.772	0.007992	Enox2
-0.7278	3.332	0.007992	Maf1
-0.5393	7.043	0.007992	Cnn3
-0.6685	3.921	0.007992	Scamp3
0.5284	5.716	0.008016	Thsd7a
-0.57	4.595	0.008057	Sbds
-1.461	1.672	0.008057	Arxes1
-0.6006	4.541	0.008064	Slc30a4
-0.4612	9.294	0.008102	Sema6d
-0.4772	5.162	0.008135	Fgfrl1
-0.5291	5.272	0.008135	Txndc5
0.4989	6.994	0.008152	Crlf3
-1.581	1.494	0.008152	Scml2
0.4933	8.01	0.008158	Fchsd2
-1.189	8.552	0.008161	Gm15564
-0.6735	9.006	0.008161	Pla2g7
-0.6758	4.53	0.008187	Gabarap
-0.7806	6.539	0.008188	Tubb2b
-1.034	3.24	0.008188	Map1lc3a
-0.5613	4.041	0.0082	Taldo1
-1.014	2.922	0.008201	Krtcap2
0.5231	6.336	0.008201	Cbl
0.4267	8.122	0.008207	Mllt10
0.4135	6.22	0.008207	Zup1
-0.7882	3.638	0.008207	Get3
-1.273	2.544	0.008207	Banf1
-0.8553	4.39	0.008207	Fkbp4
-0.845	3.134	0.008209	Ccdc126
-0.9465	4.235	0.008214	Tmem129
0.4513	7.49	0.008297	Sfpq
-0.7734	5.136	0.008297	Lmcd1
-1.336	1.521	0.008314	Cdk2ap2
-0.6597	5.595	0.008346	Spry2
-0.4509	10.17	0.008346	Gpm6a
0.4106	6.818	0.008347	Mapkap1
-1.225	1.667	0.008347	AI849053
-0.4502	5.198	0.008347	Clcc1
0.858	6.606	0.008347	A330033J07Rik
0.4497	5.854	0.008347	Ric1
0.375	6.638	0.008351	Arnt
0.4035	5.948	0.008351	Tpp2
-0.5398	5.617	0.008351	Tmx1
-0.7891	4.064	0.008351	Klhl11
0.4367	7.264	0.008351	Reps1
-0.6955	4.91	0.008354	Sod1
-0.8689	4.861	0.008363	Sox1
-0.7027	4.596	0.008363	Tmem184c
-1.098	3.041	0.008363	Ndufa11
0.8712	3.596	0.008378	Scube1
0.3522	6.686	0.008378	Golga4
0.4296	7.702	0.008399	Fam193a
-0.4888	5.328	0.008399	Kifbp
-1.186	4.031	0.00842	Gstk1
-0.5254	8.469	0.008437	Fads2
-1.013	4.851	0.008451	Sox21
-0.63	3.706	0.008454	Lmf2
-1.075	3.225	0.008454	Ndufa2
-0.6971	4.386	0.00849	Metrn
-1.02	2.304	0.008499	Mrpl43
-0.5401	6.574	0.008499	Tmx3
-0.4519	7.9	0.008499	Ncan
-0.7945	2.56	0.008499	Cfap298
1.1	3.306	0.008499	Adarb1
0.4116	6.82	0.008546	Lrp6
-1.116	4.632	0.008553	Retsat
0.3646	6.841	0.008563	Thrap3
-0.5516	6.262	0.00862	Hadhb
0.4725	6.014	0.008641	Dcaf5
-0.4966	4.897	0.008657	Gde1
0.7351	3.614	0.008685	Glb1l
0.3788	7.847	0.008736	Strn3
1.695	4.785	0.008798	Disc1
-0.784	4.45	0.008808	Cstf2t
-0.6736	7.984	0.008911	Cd81
-0.6387	5.847	0.008911	Tgfb2
0.6579	7.002	0.008912	Ankrd6
-2.04	1.859	0.008923	Cntn4
-1.308	2.407	0.008923	Tceal1
-0.6183	4.024	0.008923	Rab5if
1.374	1.111	0.008956	Gm2415
0.3981	5.87	0.008956	Hspa4
-0.6374	4.955	0.008959	Gpc4
-0.5437	4.582	0.008959	Gm16499 - ENSMUSG00000108175
0.3894	7.107	0.008959	Nsd3
0.7919	3.518	0.008989	Smarcd2
-0.6452	3.388	0.008989	Rps26
-0.8071	4.95	0.008993	Fut10
0.4381	6.532	0.009004	Ascc3
0.3932	7.293	0.009004	Myo9a
0.3987	8.56	0.009004	Arid1b
-0.5988	4.448	0.009008	Tmed9
0.8052	8.381	0.009043	Akap6
0.3926	6.731	0.009052	Pten
-1.16	2.399	0.009122	Mtln
-0.742	3.133	0.009131	1810037I17Rik
-1.005	3.041	0.009131	Tmem276
0.4045	5.7	0.009131	Brd1
0.5495	5.924	0.009131	Traf3
0.7096	4.463	0.009131	Mlh1
-0.5114	5.364	0.009131	Arl6ip5
-1.045	2.976	0.009131	Tram1l1
-0.6957	4.205	0.009131	Unc50
-0.6457	10.21	0.009212	Lrp1b
-0.5189	4.719	0.009212	Actr10
0.4487	5.495	0.009212	Camsap1
-0.7898	4.062	0.00922	Plin3
-0.5449	5.949	0.009229	Clip3
0.6461	7.471	0.009229	Tle1
-1.038	4.3	0.00929	Adamts1
0.6167	6.722	0.00929	Dock9
0.545	6.708	0.00929	Slc10a7
-0.4826	5.705	0.00929	Zmpste24
-0.5438	8.182	0.00929	Mfap3l
0.4521	7.179	0.00929	Zmym4
-0.5695	4.311	0.00929	Otub1
0.9329	4.512	0.009313	Trim12a
0.557	5.003	0.009313	Gigyf1
-0.4302	6.309	0.009327	Ctso
-0.9166	3.22	0.009351	Dgcr6
0.5509	4.937	0.009365	Slc22a4
-0.52	7.006	0.0094	Slc41a1
-0.5942	9.472	0.0094	Scd2
0.5509	6.662	0.0094	Kctd1
-0.6936	4.339	0.0094	Smpd2
-0.941	3.264	0.009462	Fndc5
-0.7	3.798	0.009462	Nat1
0.5432	5.422	0.009475	Mapkapk2
-0.6537	6.141	0.009489	Camk2n1
0.5395	4.29	0.009496	Zfp738
0.3625	6.902	0.00954	Cyth1
-0.6986	4.576	0.00954	Eif1ax
0.4468	7.413	0.009545	Dleu2
0.4915	8.695	0.009549	Kcnma1
-0.8183	4.053	0.009549	Eif1b
-0.9329	3.878	0.009564	Egfl6
-0.6743	3.518	0.009568	Cpt2
0.4572	4.667	0.009621	Ppp4r1l-ps - ENSMUSG00000055897
-0.5351	5.661	0.009622	Atp6v1e1
-0.6757	3.927	0.009622	Slc25a11
0.7318	7.554	0.009622	Aff1
-0.485	6.503	0.009622	Pea15a
0.8093	4.612	0.009622	Aagab
-1.311	1.201	0.009622	Ppp1r1a
0.3856	7.117	0.009622	Rbm5
0.4778	7.015	0.009622	Kif13a
0.4032	6.342	0.009675	Raf1
-0.8554	3.052	0.009677	Tmem14c
-0.4499	6.007	0.009677	Efcab14
-0.9437	3.031	0.009688	Gm42196
0.5459	5.787	0.009767	Ccnl1
0.9046	4.102	0.009783	Ostf1
0.6835	6.262	0.009806	Dock11
0.779	4.346	0.009806	Mgmt
-1.158	2.037	0.009844	Acot2
-0.4973	7.178	0.009891	Rftn2
-0.4882	5.822	0.009891	Syn3
0.3981	5.624	0.009906	Acbd6
-1.277	2.2	0.009912	Hcfc1r1
0.8228	3.601	0.009912	Zfp862-ps
-0.7161	3.485	0.009912	Vwa1
1.364	4.194	0.009917	A730056A06Rik
0.6121	4.922	0.009917	Ttll4
0.4446	7.776	0.009962	Rbm25
-0.6128	4.958	0.01001	Ggh
0.4197	7.677	0.01002	Mark3
-0.6768	4.014	0.01002	Sdhd
-0.8503	3.769	0.01006	Rpl7
-0.5821	3.941	0.01024	Hnrnpa0
-0.55	5.319	0.01024	Entpd2
0.4601	5.225	0.01024	Cnot6
-0.4277	6.254	0.01025	Nlgn3
-0.7962	3.752	0.01025	Stom
-3.209	0.3193	0.01025	Gm16251
0.4848	6.479	0.01026	Xkr6
0.5377	4.952	0.01026	Dhdds
-0.5937	8.619	0.01028	Ntsr2
0.5573	6.004	0.0103	Mdn1
-0.7431	4.857	0.0103	Sod3
1.129	2.842	0.0103	Ikbke
-0.5579	4.575	0.0103	Bckdha
-0.7684	3.831	0.01032	Pcdh19
0.7322	4.555	0.01034	Eif2b3
0.4614	6.478	0.01037	Map3k5
0.4168	7.12	0.01042	Ehmt1
0.4018	7.656	0.01042	Rabgap1l
0.4001	7.117	0.01045	Pum1
-0.7426	4.181	0.01048	Ak1
-1.325	1.579	0.01048	Trappc2l
-0.5971	6.583	0.01051	Tlcd1
-0.5794	5.05	0.01052	Psma2
0.822	3.722	0.01054	Ccdc61
0.3832	5.665	0.01055	Agap3
0.3847	7.605	0.01059	Zfp638
-0.4993	5.375	0.01059	Bzw1
0.5084	8.374	0.01059	Tle4
-0.5275	5.849	0.0106	Vdac1
0.4998	5.668	0.0106	Cyld
0.6693	6.123	0.01064	Spata5
0.4276	6.612	0.01064	Rock2
-1.161	2.285	0.01066	Srxn1
-0.5902	6.043	0.0107	Zfp36l2
0.6319	5.289	0.0107	Mideas
0.885	3.07	0.01071	Cenpo
0.6462	3.601	0.01071	Lbr
0.4325	7.226	0.01076	Gab1
-1.129	9.707	0.01078	Aldoc
0.3492	7.33	0.01079	Celf1
-0.7038	4.396	0.01081	Acot13
-0.7703	4.089	0.01086	Selenbp1
1.26	1.712	0.01086	Sox11
-0.4534	4.704	0.01086	Rhoj
0.4393	6.425	0.01086	Ints6
0.4162	7.212	0.01086	Gbf1
0.3688	6.661	0.01086	Tut4
0.7011	6.946	0.01089	Ski
-0.6632	4.488	0.01096	Rab33b
-0.603	5.863	0.01097	P4hb
-0.6691	4.316	0.01102	Hyal1
-1.219	1.49	0.01102	Rpp25l
-0.5024	7.031	0.0111	Calr
0.3457	6.177	0.0111	Usp40
0.6694	5.275	0.01112	Ptpn1
0.4231	8.467	0.01116	Crebbp
-0.5997	4.367	0.01117	Alg11
0.3883	6.727	0.01118	R3hdm2
-0.9345	2.725	0.0112	1700123O20Rik
-0.4506	5.262	0.0112	Sypl
1.489	1.291	0.01133	Stag3
0.8319	6.923	0.01133	Numb
0.4227	6.669	0.01133	Lyst
0.3922	6.673	0.01133	Lin52
0.5208	5.145	0.01133	Nars2
-0.6773	4.935	0.01136	Sgcb
-0.825	4.101	0.01139	Hey1
-0.934	2.999	0.01142	Srm
-0.9505	3.094	0.01144	Cuta
0.5369	7.717	0.01147	Cux1
0.4089	7.283	0.01149	Mtmr3
-0.5923	5.237	0.01151	M6pr
0.3903	5.44	0.01151	Akap8
-0.4671	5.923	0.01157	Selenof
-0.4446	5.358	0.01158	Hdhd2
0.5033	5.031	0.01158	Tesk2
-0.4561	4.852	0.01168	Txnrd1
0.3788	6.811	0.01169	Zzef1
-0.7493	2.927	0.01169	Slc46a1
-0.952	2.342	0.01176	Fahd1
0.8556	2.513	0.01176	Bend7
-0.4175	5.665	0.01176	Uba1
-0.7652	4.192	0.01176	Ndufa6
0.4325	7.074	0.01176	Rai1
-0.9275	2.346	0.01185	Mrpl16
0.4568	4.894	0.01186	Socs7
-0.3601	6.956	0.01188	Atp5c1
-1.22	2.551	0.01198	Timm8b
-0.5563	4.423	0.012	Sf3b6
-0.8979	2.587	0.012	Txnl4a
0.3473	7.893	0.01201	Nsd1
-0.7239	5.321	0.01202	Map1a
0.4553	6.264	0.01205	Sdccag8
0.7998	4.055	0.01208	Cit
-0.6212	5.96	0.0121	Gm2a
0.3941	7.758	0.01211	Tbl1xr1
0.443	7.195	0.01211	Cuedc1
-0.4667	5.285	0.01211	Rab11b
-0.4378	5.916	0.01211	Gdi1
4.363	1.602	0.01214	ENSMUSG00000121318
-0.9124	3.43	0.01215	Slc2a12
-1.05	2.964	0.01235	Tmem256
-0.8083	3.438	0.01245	Tbrg1
0.4991	5.2	0.01245	Sptlc2
-0.5789	4.775	0.01245	Cwc15
-0.4332	8.498	0.01256	Xpr1
-1.388	0.7689	0.01257	2010320M18Rik
-0.4699	4.986	0.01257	Ggps1
-1.23	3.398	0.01257	Ndufs8
-0.5563	6.937	0.01257	Slc9a3r1
0.6085	6.437	0.01257	Pak1
-0.487	4.819	0.01257	Psmc1
0.4827	8.933	0.01257	Gnaq
-0.9297	3.553	0.01257	1700010K23Rik
0.3871	7.217	0.01257	Ube2k
-0.5762	4.455	0.01257	Adprh
-0.7345	4.259	0.01257	Uqcrb
0.4834	5.831	0.01257	Zscan26
-0.6102	5.055	0.01258	Slc16a1
0.3638	5.792	0.01261	Shoc2
-0.8617	8.548	0.01261	Ckb
0.919	5.688	0.01261	Man1a
2.82	5.068	0.01263	Fam163a
-1.169	2.2	0.01264	Rnf113a2
0.4488	6.957	0.01264	Mvb12b
0.6993	3.493	0.01267	Ppox
-0.7758	3.436	0.01267	Mul1
-1.09	1.934	0.01268	Nop10
0.4727	5.305	0.01268	Map3k4
0.5536	4.354	0.01282	Nfxl1
1.067	2.004	0.01282	D130019J16Rik
0.3979	7.454	0.01282	Ahcyl2
0.4247	5.298	0.01282	Snap23
-1.148	2.339	0.01296	Guk1
-0.7942	3.753	0.01298	Tspyl4
-0.5317	5.116	0.01299	Rida
0.4455	4.74	0.01302	Jdp2
-0.4259	7.36	0.01303	Cs
0.4384	6.795	0.01303	Top1
-0.8259	3.005	0.01303	ENSMUSG00000121477
-0.5975	4.596	0.01303	Pa2g4
-0.4858	6.414	0.01306	Sec62
-0.5393	4.319	0.01307	Fam8a1
-1.239	1.766	0.01309	Imp3
0.7566	3.564	0.01309	Cracr2a
0.3911	6.374	0.01312	Ino80
-0.6704	4.827	0.01312	Lrp10
0.5425	4.135	0.01312	Fam76a
-0.4561	5.258	0.01312	Pnrc2
0.9448	2.443	0.01314	Plekhd1
-0.5079	8.784	0.01314	Hepacam
-0.7986	3.711	0.01314	Emc4
0.3613	7.369	0.01314	Scaf8
-0.8351	7.392	0.01315	Sox9
-0.5793	8.527	0.01319	Psap
-0.4741	5.184	0.01321	Abcb9
0.7691	6.113	0.01321	Itpr1
-0.6225	6.156	0.01323	Pou3f2
-1.045	2.308	0.01323	Rps27l
0.4503	4.712	0.01323	Pcsk7
0.3867	7.431	0.01323	Sbf2
-0.6457	4.033	0.01323	Tmem259
-0.8732	4.597	0.01323	Gas1
-0.7248	4.254	0.01325	Atp5d
-0.6216	4.005	0.01325	Vegfb
-0.9234	2.791	0.01325	Smim29
-0.6268	4.308	0.01325	Tex264
-0.9618	4.705	0.01327	Tuba1a
0.4214	5.521	0.01333	Jakmip2
-0.7152	2.886	0.01333	Tufm
-1.254	2.282	0.01339	9330185C12Rik
-1.088	3.558	0.0134	Spcs1
0.5051	4.808	0.01343	Utp20
0.4532	5.168	0.01343	Pus10
0.9979	4.629	0.01346	Zfp697
-0.5308	5.046	0.01346	Klhl9
-0.606	5.751	0.01347	Nnat
-0.5556	4.25	0.01351	Tmem70
-0.7041	5.409	0.01351	Hsp90aa1
-0.4027	7.492	0.01351	Ywhae
-0.554	11.69	0.01353	Slc1a3
0.9078	4.716	0.01354	A930015D03Rik
-1.066	4.777	0.01357	Fabp5
0.3589	5.797	0.01357	Msantd2
-0.5	6.052	0.01357	Hspa9
-0.5633	4.464	0.01359	Cers2
-0.7567	4.656	0.0136	Etfb
-0.6852	3.882	0.0136	Hint1
0.4356	7.397	0.0136	Kansl1l
-0.6737	3.392	0.01364	Trim32
0.4695	6.561	0.01365	Nrip1
0.4677	6.014	0.01368	Cyb5b
-0.8171	3.75	0.01369	Cavin3
-0.7052	4.924	0.01374	Nrg1 - ENSMUSG00000062991
0.3204	7.488	0.01374	Ppp6r3
-1.045	3.317	0.01374	Ndufa3
0.3858	5.927	0.01381	Ubn1
0.3548	6.075	0.01382	Trappc8
-0.5129	4.534	0.01382	Mmgt2
-0.6546	7.008	0.01388	Hsp90ab1
0.4484	8.21	0.0139	Ttc28
-0.6245	6.25	0.0139	Hsd17b11
-0.7056	2.733	0.01391	Glrx
0.7879	4.79	0.01391	Hps4
-1.554	1.66	0.01391	Ndn
-0.5523	8.413	0.01391	Fgfr3
0.7903	5.166	0.01391	Fbxw4
-0.5655	6.89	0.01398	Atp1b1
-0.6135	4.859	0.01405	Ndufs2
-0.509	9.587	0.01405	Ttyh1
-0.8914	3.695	0.01405	Prdx3
-1.086	1.724	0.01409	Nqo1
-0.4241	4.902	0.01409	Gnl3l
0.3653	5.537	0.01409	Tecpr2
-0.457	5.252	0.01409	Ap5m1
-0.507	4.451	0.01416	Psmd6
-0.5538	4.612	0.01416	Fads6
0.409	5.555	0.01416	Txndc11
-1.037	2.367	0.01424	Tsku
0.4709	6.304	0.01424	Cabin1
0.3695	5.561	0.01424	Dhx57
-0.4191	8.456	0.01424	Baalc
0.6113	5.462	0.01424	Gm7967
-0.5804	4.767	0.01424	Fah
0.4739	4.651	0.01426	Gtpbp2
-0.3867	8.474	0.01426	Asrgl1
-1.512	1.577	0.01426	Pigyl
-0.3914	6.474	0.01426	Ppp2ca
0.3504	7.394	0.01426	Atf7ip
-0.6693	4.622	0.01432	Rnf215
0.3311	8.552	0.01432	Rere
0.3525	5.902	0.01432	Zfx
1.23	8.872	0.01432	Zswim6
0.4773	4.835	0.01432	Edc3
-0.512	5.479	0.01432	Tmbim1
0.4321	7.113	0.01432	Sat1
-0.5651	6.616	0.01434	Tecr
-1.425	0.8231	0.01434	Trac
-0.5964	3.915	0.01435	Tmem237
-1.378	2.568	0.0144	Dclk3
-0.3571	8.523	0.01441	Pygb
0.3582	7.487	0.01443	Nsmce2
-0.5038	5.565	0.0145	Clcn4
-0.3677	7.351	0.01451	Pantr1
-0.746	6.65	0.01451	Atp5pb
0.3457	6.902	0.01451	Arglu1
-0.4864	4.809	0.01452	Psmd7
-0.4929	4.14	0.01453	Them4
1.025	2.106	0.01453	Irf1
-0.7474	4.016	0.01458	Gcsh
0.5166	4.601	0.01458	Mrps27
-0.7267	5.105	0.01458	Paics
-0.5081	4.439	0.0146	Zfp354c
-1.057	2.403	0.0146	Praf2
-0.6445	3.674	0.01461	Chmp1b
0.8422	5.075	0.01466	Gtf2h2
-1.399	1.41	0.01468	Gm54798
-0.6734	3.583	0.01468	Haus2
0.6794	3.124	0.01468	Kctd9
0.4725	5.008	0.0147	4933427D14Rik - ENSMUSG00000020807
-0.99	2.676	0.0147	Amigo2
0.4123	7.838	0.0147	Kat6b
0.3734	6.235	0.01471	Wdr20
-0.7336	2.762	0.01473	P3h4
-0.8302	2.432	0.01473	Rex1bd
0.4665	6.303	0.01473	Mthfs
-0.9372	2.172	0.01473	0610009B22Rik
-0.6851	5.562	0.01473	Sema6a
0.3275	6.994	0.01474	Wac
-0.407	7.195	0.01479	Pgm1
0.8733	3.034	0.01486	Mri1
-0.4459	4.871	0.01486	Usp5
1.39	3.611	0.01489	Xkr4
-1.068	2.286	0.01493	Pcsk1n
-0.5224	4.449	0.01493	Ier3ip1
1.559	0.721	0.01501	Gm10037
-1.298	1.197	0.01501	Mrpl53
-0.6792	3.453	0.01502	Slc35b2
-1.18	2.996	0.01502	Gadd45g
-0.633	4.526	0.01502	Lhcgr
1.492	6.743	0.01502	Ssh2
-0.9205	4.752	0.01502	Sfrp1
0.371	6.111	0.01503	Mef2d
0.553	4.788	0.01503	Elk4
0.8081	2.665	0.01503	Setdb2
0.5232	4.632	0.01512	Mpped1
0.3925	7.631	0.01512	Rbfox2
0.8566	4.434	0.01517	Lpgat1
-0.5137	5.686	0.01518	Bpnt2
0.4227	5.237	0.01518	Mtmr6
0.9271	5.514	0.01526	C030005K06Rik
-0.9379	3.213	0.01527	Atp6v1f
0.403	4.833	0.01528	Rnf41
1.079	2.453	0.01533	Calhm2
0.5674	5.366	0.01533	Ercc6
0.4096	4.607	0.01534	Zfp808
-0.5253	4.667	0.0154	Nde1
0.4139	9.328	0.01542	Prkn
-0.9211	2.571	0.01542	Txndc17
-0.6021	4	0.01542	Ankra2
-0.5619	3.559	0.01543	Fem1a
0.3556	6.946	0.01543	Ralgps1
-0.6598	6.692	0.01543	Aldh6a1
-0.9093	2.136	0.01546	Ints5
0.3305	6.767	0.01546	Setd2
0.8919	3.043	0.01546	Fam78b
0.4011	5.672	0.01546	Foxk2
-0.8397	3.256	0.01546	Tm2d3
-1.409	2.336	0.01546	Bcam
0.487	5.965	0.01546	Zc3h7a
-1.241	7.475	0.0155	Mt1
-0.3218	7.159	0.0155	Glg1
-0.726	3.351	0.0155	Commd6
1.641	1.711	0.01551	Junb
-0.5284	4.355	0.01551	Leprotl1
1.175	3.581	0.01553	Slc38a1
0.5157	6.647	0.01556	Anks1
1.476	1.904	0.01561	Shq1
-0.6825	6.293	0.01562	ENSMUSG00000120081
0.3897	5.335	0.01562	Lemd3
0.7819	3.974	0.01562	Malt1
0.5935	6.744	0.01564	Kdm3a
-0.4285	6.95	0.01564	Lgi4
-0.6367	3.784	0.01568	Cd151
-0.4495	5.356	0.01584	Srpr
-1.799	0.6542	0.01586	Kcne1l
-0.5307	4.671	0.01587	Psma6
-0.5801	3.364	0.01587	1700003M07Rik
0.658	5.244	0.01587	Exoc6
-0.5536	6.41	0.0159	Septin11
-0.8899	3.792	0.01594	Prdx5
2.95	4.079	0.01596	Egfem1
-0.4132	5.721	0.01601	Bdh1
0.4307	9.951	0.01601	Dock4
-0.5458	4.839	0.01601	Eif5a
0.3389	7.161	0.01601	Arhgap12
-0.4045	4.985	0.01603	Med25
-0.6456	3.816	0.01606	Gpt
0.366	6.776	0.01608	Arid4a
0.8669	4.987	0.01613	Nfatc1
0.3537	6.473	0.01614	Evi5
0.5764	5.726	0.01614	Mapk14
0.4985	6.633	0.01614	Tet3
0.6818	3.903	0.01614	Cep135
-0.6745	3.32	0.01614	Mrpl47
0.4116	5.767	0.01614	Parn
-0.9333	2.09	0.01614	Nsg1
0.5314	4.047	0.01614	Tjap1
0.4196	5.473	0.01616	Ankrd10
0.6423	4.026	0.01618	Ciapin1
-0.9379	2.116	0.01621	Map10
0.4207	5.681	0.01621	Lrpprc
-1.01	1.661	0.01621	Ciao2b
1.134	5.635	0.01621	Zdhhc14
0.4818	7.744	0.01623	Tbc1d5
-0.5088	7.594	0.01629	Hsp90b1
-0.8062	6.465	0.01629	Bsg
-1.242	4.867	0.0163	Hes5
0.384	6.578	0.0163	Zfc3h1
-0.4802	7.847	0.0163	Tnfrsf19
0.3921	6.039	0.01635	Gpbp1
-0.7304	3.573	0.01635	Atp6v0e2
0.3465	7.852	0.01635	Cdk19
0.3199	6.998	0.01637	Asxl2
-0.8577	3.32	0.01637	Fpgt
-0.6329	3.841	0.01637	Gtf2h5
-0.9141	3.541	0.01637	Tmed3
-0.3411	5.821	0.01639	Snx3
-1.444	1.059	0.0164	Rps6ka6
0.5082	9.817	0.0164	Nhsl1
-0.388	6.797	0.0164	Fat1
0.461	7.208	0.0164	Prickle2
1.218	3.575	0.01641	Gm20605
-1.354	2.234	0.01641	H2az1
0.3843	9.783	0.01648	Fgfr2
-0.333	6.616	0.0165	Clstn1
-0.3406	8.209	0.01652	Atp2a2
-0.9274	3.22	0.01652	Atp5g1
-0.3712	5.583	0.01652	Rad21
0.3086	7.407	0.01652	Pcmtd1
-1.167	6.759	0.01653	Gstm5
-0.4899	7.301	0.01655	Fads1
-0.6756	3.867	0.01655	Myl6
-0.4422	5.136	0.01655	Bhlhb9
-0.9647	4.316	0.01655	Cox6a1
-0.3517	5.744	0.0166	Ptma
0.5018	6.084	0.0166	Mtss1
0.4641	4.941	0.01664	Eipr1
0.4965	7.746	0.01664	Btbd9
0.3683	5.544	0.01664	Mrps6
-0.7404	3.007	0.01665	Pde12
-0.7169	3.758	0.01667	Tlcd5
0.766	5.166	0.01667	Tubgcp3
-0.9028	3.196	0.01667	Lpar4
0.4782	4.848	0.01667	1700025G04Rik
-0.8129	2.995	0.01668	Rps21
-0.774	3.756	0.0167	Ndufs7
0.6556	5.264	0.01671	Klf13
0.3311	6.656	0.01672	Baz1b
-0.5845	3.835	0.01675	Zfp703
-0.7681	2.543	0.01675	Ccdc107
0.3254	8.687	0.01675	Luc7l2
0.4629	4.308	0.01675	Uchl3
-0.8862	4.93	0.01679	Gm49342
0.7653	5.759	0.0168	Eml4
-0.4485	5.507	0.0168	F730043M19Rik
-1.193	2.327	0.01683	Selenom
0.653	6.501	0.01688	Gtdc1
-0.42	8.636	0.01688	Slc27a1
-1.094	1.786	0.01688	Gcat - ENSMUSG00000006378
-1.097	3.89	0.01688	B230206L02Rik
-0.6405	4.211	0.01688	Arx
-0.8152	5.999	0.01688	Tubb2a
-0.7226	3.403	0.01688	Eif3g
-0.528	7.042	0.01688	Adra1a
-0.5774	4.493	0.01688	Psmc3
0.3187	6.453	0.0169	Vps8
-0.6317	3.763	0.0169	Fcgrt
1.035	4.125	0.01692	Lacc1
0.3536	6.723	0.01692	Helz
0.4859	5.418	0.01693	Ralgapa2
-0.4907	7.817	0.01698	Mlc1
-1.516	1.625	0.01698	Nog
-0.3583	6.982	0.01698	Clcn3
0.6969	8.223	0.01699	Foxo1
0.3116	6.507	0.01705	Akap8l
-1.016	5.889	0.0171	Lcat
0.4391	6.072	0.0171	Gls
-0.4787	4.097	0.01717	P4htm
0.4647	9.474	0.01724	Ddhd1
-0.388	7.144	0.01724	Lrp4
-0.5025	5.83	0.01724	Pax6
-0.369	5.386	0.01725	Septin9
-0.6647	3.135	0.01728	Cox14
-0.4663	4.478	0.01728	Arpp19
0.3392	6.814	0.01737	Map2k5
-0.87	2.867	0.01744	Ubl5
0.3749	6.162	0.01744	Slc38a9
2.128	1.429	0.01744	Insyn2b
0.3433	7.14	0.01744	Gm21992
-0.497	6.242	0.01744	Ctxnd1
0.5292	5.468	0.01744	Slc39a11
-0.7046	5.743	0.01744	Lrpap1
0.4691	5.772	0.01746	Lrrc49
0.6429	4.48	0.01746	Rap1gap
0.9811	4.797	0.01748	Aacs
-0.6378	5.364	0.01748	Ephb3
0.4464	6.741	0.01748	Smurf2
0.4236	4.566	0.0175	Utp14a
-0.5158	7.136	0.0175	Chrdl1
0.4512	5.064	0.0175	Gpatch2l
-0.6663	3.382	0.0175	Paqr6
0.3564	7.669	0.0175	Gpatch8
-0.5101	4.453	0.01756	Snx33
-0.8853	2.777	0.01766	Rfk
-0.4511	5.585	0.01773	Ppp2r1a
-1.062	2.587	0.01773	Chchd1
0.5859	5.61	0.01773	Lpin2
0.5552	7.197	0.01775	Actr3b
0.6407	4.955	0.01776	Aff3
0.4253	5.618	0.01776	Tpk1
-0.6584	2.776	0.01777	Slc2a8
-0.7653	2.601	0.01777	Dmrta2
-1.342	2.278	0.01782	Lzts1
-0.4436	4.379	0.01782	Eif3d
0.5109	4.467	0.01785	Tdp1
0.3942	7.196	0.01791	Abl2
-0.507	5.343	0.01792	Ro60
-1.6	1.109	0.01792	Cyb561d2
0.6429	6.472	0.01795	Acly
0.7069	3.837	0.01795	Gm12216
-0.4597	6.025	0.01795	AA387883
0.4174	7.977	0.01795	Wnk1
-0.6869	4.577	0.01795	Ndufv1
-0.5274	3.659	0.01795	Prelid3b
0.4079	6.199	0.01796	Zkscan3
-0.5668	4.852	0.01805	Shisal1
0.6961	8.527	0.01822	Epb41l2
0.3489	5.834	0.01822	Fam193b
0.7403	4.286	0.01826	Sbno2
-0.6882	3.273	0.01827	Slirp
-0.7862	2.411	0.01829	4930505G20Rik
0.4396	6.448	0.0183	Wdfy2
-0.6508	4.663	0.01833	Hgsnat
0.5192	6.38	0.01833	Plekhm3
0.332	6.307	0.01833	Ap1g1
0.341	6.041	0.01835	Rev1
-0.5885	3.474	0.01839	Mrpl9
0.3736	6.154	0.01839	C2cd5
0.3407	6.024	0.01839	Foxj3
-1.115	1.763	0.01842	Tpbg
-0.6917	4.642	0.01851	H2bc4
-1.228	3.061	0.01861	Elob
-0.575	5.389	0.01862	Wfs1
-0.8482	2.755	0.01862	Pam16
-0.9195	3.201	0.01862	Rpl38
-0.4896	5.607	0.01863	Plekhb1
0.4019	8.192	0.01863	Ddx17
-0.4945	3.932	0.01863	4930523C07Rik
0.5448	5.391	0.01863	Cep83
0.3628	6.72	0.01871	Ccny
-0.5922	3.201	0.01871	Irgq
-0.7894	2.496	0.01874	Churc1
-0.4075	6.168	0.01874	Dtx1
0.4873	5.992	0.01874	Wsb1
-0.8902	3.086	0.01874	Adra2a
-0.5746	4.805	0.01877	Zfp706
-0.6814	3.667	0.01878	Nudcd2
0.7417	4.458	0.01882	Samhd1
-0.694	3.343	0.01885	Prmt1
0.3999	6.424	0.01885	Alms1
-0.3641	6.927	0.01887	Lmbrd1
-0.5809	4.236	0.01889	Msantd4
0.9969	3.142	0.01889	St8sia1
0.3396	6.166	0.01889	Stx16
-1.016	2.401	0.01889	1700027H10Rik
-0.7765	2.743	0.0189	Zfp422
-0.4043	4.958	0.019	Ctbs
-0.6234	10.06	0.019	Ptn
-0.4909	4.826	0.019	Ppp1r15b
-0.9304	2.383	0.019	Mad2l2
-1.424	1.458	0.019	Zc3hav1l
0.4788	5.83	0.019	Morc3
0.5715	6.437	0.019	Rapgef1
0.5654	7.365	0.019	Cnnm2
0.452	5.009	0.019	Vac14
-0.3812	5.787	0.019	Nucks1
0.8003	3.359	0.019	D2hgdh
-0.7094	3.444	0.019	Rnd2
-0.3737	5.954	0.01902	Wnt7b
0.3518	7.237	0.01902	Mib1
-0.5906	6.058	0.01905	Gaa
-0.5224	6.283	0.01905	Flrt2
0.9241	4.744	0.01906	Tpst2
-0.5187	5.428	0.0191	Pdia6
0.4144	6.933	0.0191	Map4k3
0.374	7.47	0.01911	Rbm6
0.4187	5.317	0.01915	Gon4l
-0.7805	3.448	0.01916	Gm11627
0.9478	2.885	0.01916	Mthfd1l
-0.5639	3.415	0.01919	Agtrap
0.8103	5.613	0.01919	Sipa1l1
-1.126	1.509	0.01923	Pcdhb3
-0.6139	4.345	0.01923	Poldip2
0.3977	6.052	0.01923	Nsf
0.5162	4.353	0.01923	Heatr1
-0.4583	8.991	0.01923	Acsbg1
0.3346	7.215	0.01923	Rbm26
-0.5606	3.39	0.01923	Rab10os
-0.3725	5.041	0.01923	Manbal
-1.25	1.14	0.01925	Gm49064
0.4709	4.96	0.01927	Zfp933
-0.5833	5.002	0.01935	Idh3b
-0.4752	4.448	0.01936	Vps4a
0.7051	4.981	0.01937	Ppcdc
0.3282	7.541	0.01937	Ncor2
0.3039	7.25	0.01942	Bptf
-1.066	1.829	0.01944	Mrpl57
0.5895	5.956	0.01946	Ulk2
-0.8113	2.519	0.01949	Tubg1
-0.5734	4.313	0.0195	Pdap1
0.2928	8.046	0.01954	Ankrd17
-0.3904	6.528	0.01957	Pkm
-0.4884	4.887	0.01958	Tmem100
0.4749	4.48	0.01958	Kmt5c
-0.7393	2.942	0.01959	Fuom
-0.5413	5.346	0.01959	Gys1
0.3466	6.117	0.01973	Prr14l
-0.6028	5.846	0.0198	Pdk2
-0.9018	6.861	0.01981	Prxl2a
0.4547	4.304	0.01985	Usp31
0.9726	3.183	0.01986	Sh3bp1
0.4174	6.08	0.01996	Gm1976
0.4981	8.031	0.01997	Cyrib
0.3948	5.953	0.02001	Copg2
0.9608	7.913	0.02009	Hdac4
-0.5754	4.473	0.02015	Vbp1
0.5747	4.354	0.02015	A530072M11Rik
0.6126	3.562	0.02022	Lmln
-0.4052	7.717	0.02024	Soat1
0.7784	5.467	0.02024	Per1
-0.8987	2.517	0.02027	Rab3a
-0.382	7.504	0.02027	Pbxip1
-1.33	3.217	0.0204	Ralyl
-0.567	4.494	0.0204	Ncln
-1.16	1.91	0.0204	ENSMUSG00000121162
-0.4448	6.187	0.0204	Fez1
-0.6735	2.964	0.0204	Fam210b
0.3536	8.265	0.02041	Bmp2k
0.4638	6.362	0.02043	Vps54
0.3427	6.456	0.02043	Bbx
-0.4386	10.07	0.02044	Trim9
0.6019	4.869	0.02046	Phka2
0.3424	5.19	0.02048	Nploc4
-1.232	1.315	0.02053	Gm38287
-0.8566	3.132	0.02055	Pebp1
0.3294	6.582	0.02057	Pcdhgb2
-0.6118	4.297	0.02057	Rer1
-0.6759	4.214	0.02059	Ramp2
-0.8599	3.356	0.02062	Txn1
-0.8676	2.313	0.02066	Myh15
-1.081	1.466	0.02069	Ndufaf3
-0.6233	3.416	0.02069	Fdx1
-0.7368	3.667	0.02069	Rps17
-0.6095	4.805	0.02071	Psmd2
-0.8426	3.844	0.02071	Inhba
1.19	0.8997	0.02071	Dnaaf8
1.064	4.351	0.02071	Hps3
0.3368	6.507	0.02077	Ewsr1
0.7334	4.307	0.02083	Gga3
-0.4728	4.984	0.02083	Zfp606
0.3652	7.266	0.02089	Atp9b
0.4324	7.677	0.02089	Dnmt3a
-0.4607	7.536	0.02091	Pcdh17
-0.7457	3.905	0.02091	Sema5b
0.5225	4.773	0.02104	Man2a1
-0.4367	4.622	0.0211	Irf2bp2
0.405	6.438	0.0211	Cbfa2t2
0.7141	5.488	0.02117	Ints6l
0.3734	6.11	0.02126	Csnk1g1
0.3401	7.263	0.02126	Mdm4
-0.6099	3.708	0.02126	Alg5
0.8653	7.596	0.02129	Pip4k2a
-0.4175	11.3	0.02134	Nlgn1
-1.097	1.939	0.0214	Coa3
-0.571	5.027	0.02141	Surf4
0.4179	5.622	0.02141	Otud4
0.976	7.036	0.02141	Usp53
0.9179	4.773	0.02141	Garnl3
-0.7747	6.227	0.02146	Tnfaip8
0.3746	6.97	0.02151	Zfp609
-0.6615	4.531	0.02151	Rpp14
1.116	2.113	0.02151	Usp13
0.4756	4.993	0.02153	Zfp740
3.797	1.651	0.02155	4930481A15Rik
0.3438	5.499	0.02155	Lars
1.028	3.62	0.02155	Ifih1
-0.6723	2.628	0.02155	Mrpl12
0.5752	4.825	0.02155	Cep192
0.9335	3.321	0.02155	Madd
-0.6142	4.166	0.02155	Chil1
0.3465	6.515	0.02155	Hmbox1
-0.7119	2.816	0.02155	Nudt16l1
-0.9962	1.397	0.02159	Tmem177
0.3571	6.555	0.02162	Myrip
-0.84	3.495	0.02162	E130311K13Rik
0.3449	7.756	0.02165	Trip12
0.4472	5.043	0.02165	Rubcn
0.3246	6.195	0.02173	Armh3
-0.4952	6.237	0.02182	Prpf8
0.805	8.288	0.02187	Srgap2
0.5998	7.737	0.02187	Pde4b
-0.9856	3.027	0.0219	Abhd8
0.4837	4.796	0.02192	Shld1
0.5662	5.272	0.02194	Mad1l1
-0.4461	4.462	0.02196	Eapp
0.4054	5.506	0.02196	Slain2
0.3215	6.678	0.02199	Cpsf6
-0.4674	6.767	0.02201	Foxn2
0.3856	6.171	0.02202	Bdp1
0.5896	4.663	0.02205	Gxylt1
1.075	1.806	0.02205	Gm8091
-0.6661	3.172	0.02205	Pltp
-0.5851	3.393	0.02205	Lrp3
0.5416	5.909	0.02205	Pwwp2a
0.3234	6.288	0.02212	Exoc2
-0.5159	3.994	0.02221	Gna11
-0.6783	3.399	0.02222	Rps27
0.4162	5.984	0.02222	Chd1
0.6114	7.556	0.02222	Rgma
-0.3839	5.173	0.02222	Tm7sf3
-1.245	1.308	0.02222	4933411O13Rik
0.3439	6.168	0.02222	Inpp5a
-0.6661	3.66	0.02222	Drap1
0.4181	5.232	0.02223	Wdr43
0.8343	1.892	0.02225	ENSMUSG00000121500
-0.7435	4.206	0.02225	Ndufa13
-0.5127	4.148	0.02225	Srprb
0.3873	9.134	0.02231	Clasp2
-0.8433	2.506	0.02231	Lamtor4
0.864	4.84	0.02234	Ttll3
0.5382	4.748	0.02234	Zc3h12c
-0.3336	7.239	0.02236	Plxnb1
-0.4634	4.742	0.02239	Aldh9a1
0.4122	5.889	0.0224	Ddx50
-0.6125	3.458	0.0224	Fundc2
-0.7306	3.025	0.0224	Nat8
-0.3354	5.81	0.02242	Ankle2
0.3274	6.551	0.02242	Herc4
0.5047	6.056	0.02244	Abl1
-0.6072	3.104	0.02244	Zfp111
-0.4284	5.371	0.02244	Pdia4
-0.6063	3.44	0.02273	Esd
0.6151	5.376	0.02274	Stk4
0.6	3.68	0.02275	Ablim2
0.3056	5.972	0.02275	Nnt - ENSMUSG00000025453
0.3983	4.952	0.02275	Ap1ar
-0.4812	5.216	0.02275	Tpgs2
-0.6567	3.86	0.02276	Ppp1ca
-1.043	4.885	0.02279	Dmp1
-0.5186	9.07	0.02279	Slc6a1
-0.7051	4.329	0.02279	H2az2
-1.017	2.748	0.02279	Mrpl14
-0.6526	4.521	0.02281	Atg9a
-0.4192	6.186	0.02284	Rab5a
-0.6338	3.771	0.02288	Ppa1
0.5618	5.562	0.02288	Ppard
0.4575	4.08	0.02288	Fra10ac1
0.3585	6.926	0.02288	Tnks
-0.6923	2.997	0.02289	Grcc10
1.063	5.47	0.02291	Ncoa3
0.3508	8.939	0.02298	Wwox
-0.8855	2.014	0.02298	Tmem258
0.3101	6.221	0.02299	Ythdc1
0.5276	5.509	0.02305	Eefsec
0.4495	4.324	0.02306	Rfx2
-0.7325	3.291	0.02306	Gm43439
-0.4229	6.18	0.02306	Uqcrc2
-1.732	0.9904	0.02307	Dpm3
0.566	4.588	0.02308	Rnpep
-0.4279	5.95	0.02308	Sall2
-0.5065	5.301	0.02308	Gm49130
0.6446	4.256	0.02311	Pinx1
0.4434	4.194	0.02311	Dgka
0.6665	7.386	0.02311	Picalm
-0.7912	2.537	0.02312	Trmt10c
-0.7498	3.317	0.02323	Relt
2.306	1.257	0.02323	Cast
-0.5566	3.958	0.02323	Dbn1
-0.4188	6.528	0.02323	Paqr7
-0.5555	4.347	0.02324	Spcs3
-0.3765	5.997	0.02327	Rpn2
0.3806	7.309	0.02327	Luc7l3
0.4236	5.182	0.02327	Fam124a
1.005	7.701	0.02328	Adam23
-0.7674	2.427	0.02331	Nubp2
-1.095	2.207	0.02331	Rpl39
-0.4498	3.917	0.02331	Lamtor5
0.9489	5.069	0.02337	Hsd17b7
0.2899	6.867	0.02346	Ube4b
0.5965	4.202	0.02348	Cep164
0.6211	3.406	0.02348	Rgl2
0.3143	6.199	0.02349	Vezt
0.3895	5.703	0.0235	Safb2
0.58	4.511	0.0235	Fancl
-0.4946	3.807	0.0235	Ilvbl
0.9694	1.738	0.02352	Clhc1
-1.141	1.772	0.02354	Gm35546
-0.5845	7.421	0.02359	Pdia3
-0.4935	5.202	0.02361	Tle5
0.3203	7.192	0.0237	Thoc2
0.3762	5.559	0.0237	Atm
-0.3975	6.658	0.02376	Dnajc3
0.347	6.488	0.02376	Kif5b
0.322	9.805	0.02376	Hivep3
-1.62	0.959	0.02377	Prss35
0.3465	7.859	0.02377	Mkln1
0.6006	5.378	0.02378	Pcyt2
0.4599	4.86	0.02378	Ttc27
0.5841	4.697	0.02381	Heatr3
-0.4168	7.413	0.02381	Slc25a18
0.4328	8.765	0.02381	Tcf7l2
0.54	5.242	0.02381	Zfp182
-0.3211	6.463	0.02381	Hmgb1
0.3266	7.505	0.02382	Snrnp70
-0.3474	5.773	0.02382	1110004F10Rik
0.3222	6.725	0.0239	Fam120a
0.3956	4.715	0.0239	Srpk1
0.3434	6.57	0.02391	Sbno1
-0.4307	8.91	0.02394	Glud1
0.4513	4.251	0.02394	Speg
-0.5345	4.635	0.02394	Aamp
-0.8546	2.339	0.02394	Mrpl36
0.5552	5.559	0.02394	Prickle1
-0.7455	2.564	0.02394	Ubl4a
0.3579	5.919	0.02394	Agtpbp1
0.3462	5.704	0.02399	Pdxdc1
0.4813	4.944	0.02399	Maml1
0.3514	8.305	0.02401	Tcf12
-0.9632	1.869	0.02401	Mrps12
-0.8653	2.575	0.02408	Psenen
-0.5086	3.482	0.02408	Ppp1r11
-0.6086	3.585	0.02408	Ran
-0.2867	7.483	0.02411	Sort1
0.4413	6.503	0.02421	Pign
0.6399	3.262	0.02421	Tarbp1
0.5349	4.33	0.02421	Zc3h3
0.3156	7.257	0.02424	Rasal2
0.4686	5.068	0.02434	Sanbr
0.3953	6.059	0.02435	Wbp1l
-0.7304	3.081	0.02438	Aqp11
-0.7208	3.169	0.02443	Taf9b
0.4214	5.558	0.02445	Adipor2
-0.4259	5.16	0.02445	Caskin2
-0.5181	4.292	0.02448	Aldh3a2
0.3451	6.557	0.02448	Atrnl1
-0.4435	5.756	0.02462	Aldh5a1
0.381	4.848	0.02466	Ift172
0.3504	7.49	0.02474	Myo18a
-0.6707	3.334	0.02476	Ppp2r5b
-0.7807	3.013	0.02476	Mrpl40
0.4506	5.603	0.02483	Snx9
0.535	6.402	0.02483	Arhgap17
0.5965	4.995	0.02484	Coro7
0.3409	8.154	0.02485	Ncoa2
-0.7212	4.332	0.02495	Sh3rf3
-0.6483	4.866	0.02498	Pxdn
0.3057	8.306	0.02504	Bcas3
0.3997	4.865	0.02505	Kmt2b
0.3038	7.179	0.02506	Cdk13
-0.6969	3.485	0.02507	Adgre5
0.4241	6.814	0.02527	Pias2
-0.7137	3.605	0.02527	2210016L21Rik
0.4815	5.778	0.02527	Osbpl11
0.3575	6.41	0.02528	Akap10
-0.9236	2.624	0.02528	Tmed1
-0.7427	2.868	0.02537	Mrps24
-1.019	1.363	0.02537	Lgals12
0.6769	3.3	0.02537	Lnx2
-1.019	1.665	0.02537	Tmem160
-0.3542	6.601	0.02537	Klhl24
-0.7405	3.356	0.02547	Tmem132a
0.395	6.16	0.02549	Acvr1
-0.9312	1.489	0.02554	Gal3st3
1.85	3.063	0.02556	Baz1a
-0.8664	1.953	0.02558	Thap11
-0.9661	2.454	0.0256	Phpt1
-0.4289	4.364	0.02562	Cope
-0.8431	3.588	0.02563	Rpl28
0.9909	1.321	0.02564	Cyb5rl
0.4896	4.639	0.02564	Dclre1c
-0.4017	5.43	0.02564	Rhobtb2
-0.4782	6.259	0.02565	Ssr3
-0.7615	3.022	0.02567	Suox
0.3121	5.707	0.02577	Smarcad1
0.3573	6.855	0.02581	Dennd1b
-0.3717	5.71	0.02581	Arl8a
-0.721	4.484	0.02584	Rab4a
0.5741	3.869	0.02589	Mbd6
0.7501	2.921	0.0259	Plpp4
-0.7214	3.423	0.0259	Cnpy2
0.3516	6.622	0.0259	Sfswap
-0.4468	7.511	0.0259	Slc7a2
0.8538	3.71	0.02598	2900026A02Rik
-0.6045	3.264	0.026	Alg1
-0.3408	5.656	0.02608	Tmx4
-0.6652	2.799	0.02613	Dnpep
-0.6373	3.439	0.02613	Pgam1
0.3715	6.905	0.02614	Srek1
0.3123	6.515	0.02615	Relch
0.3941	4.699	0.02617	Kansl2
0.3934	6.534	0.02619	Thada
-0.8094	3.627	0.02619	Exoc3l4
0.4184	6.16	0.02621	Itpk1
0.3695	7.442	0.02621	Phf14
-0.7585	2.771	0.02627	Ngrn
-1.032	3.485	0.02631	Gmpr
1.102	5.102	0.0264	Znrf2
-0.4028	8.961	0.02643	Mgll
-0.6684	2.73	0.02647	1700080N15Rik
0.595	3.953	0.02651	Rbms2
-0.5866	3.539	0.02657	Pdcd5
-0.6316	3.846	0.02657	Lurap1
-0.4799	4.082	0.02657	Gnptg
-0.4192	4.877	0.02661	Etfdh
-0.8703	2.604	0.02661	Gm38576
-0.5218	4.359	0.02666	Slc25a27
0.4327	7.463	0.0267	Dlg5
-0.773	2.733	0.02676	Slc16a4
-0.4026	5.518	0.02692	Polr3h
0.5248	4.639	0.02694	Tbc1d31
1.073	1.656	0.02696	Gm44767
-1.115	1.337	0.02699	Thtpa
-0.4984	5.226	0.02712	Slc16a2
-0.5772	3.351	0.02712	Mrpl30
2.1	4.537	0.02712	Rab6b
-0.4554	7.671	0.02712	Gm5089 - ENSMUSG00000115263
0.3398	7.387	0.02714	mt-Cytb
-0.3939	4.856	0.02714	Vps29
-1.111	2.244	0.02718	0610012G03Rik
0.3174	5.837	0.0272	Oxsr1
1.179	1.229	0.02742	4833411C07Rik
0.7492	6.601	0.02746	Sh3kbp1
0.5396	5.368	0.02746	Unc79
0.3211	6.773	0.02766	Usp15
-0.401	4.95	0.02766	Zfp664
-0.9374	2.252	0.02766	Tmem101
0.9766	1.523	0.02766	Engase
-0.624	3.377	0.02779	Mgat2
0.4821	3.788	0.02779	Col5a2
-0.8312	2.464	0.02781	Apex1
0.4318	5.11	0.02781	Cep162
0.3667	4.91	0.02782	Cab39l
-0.4297	4.129	0.02784	Ncbp2
0.6793	6.395	0.0279	Wipf1
0.7507	4.609	0.0279	Prune2
0.3518	6.574	0.0279	Eps15l1
-1.06	2.488	0.02794	Nkx6-2
-0.4413	4.461	0.028	Pigp
0.3202	5.437	0.028	Ddx46
-0.4517	5.246	0.028	Psmb1
-1.445	2.342	0.028	Gm10138
-0.4928	4.335	0.028	Slc25a44
0.3392	6.759	0.02801	Ranbp9
1.062	2.659	0.02812	Btbd11
-0.4076	4.63	0.02814	Pigg
0.3337	5.866	0.02819	Chm
-0.5723	3.88	0.02819	Bcas2
0.3084	6.302	0.02819	Rlf
0.4089	5.951	0.02829	Cntrl
-0.9089	1.578	0.02831	Gm16156
-0.9053	1.311	0.02832	Bloc1s1
-0.604	3.095	0.02841	Eif2b2
0.3041	7.239	0.02843	Ap3b1
0.58	6.48	0.02843	Slc12a6
-0.3481	6.045	0.02853	Pura
-0.4921	5.299	0.02853	9330188P03Rik
-0.7279	7.865	0.02853	Itih3
-0.4485	3.852	0.02855	Bscl2
-1.141	1.499	0.02856	Flrt3
0.5615	3.436	0.02862	Smg9
0.6213	4.776	0.02862	Hltf
-0.8624	2.851	0.02862	Gjb2
0.2798	6.636	0.02862	Fam13b
0.4216	6.385	0.02862	Zfp280d
1.054	2.313	0.02862	Nucb2
-0.6404	3.152	0.02862	Pigo
-0.4834	4.79	0.02862	Nlgn2
-0.4915	3.858	0.02862	Nxt2
-1.163	1.259	0.02862	Rtl8b
0.396	5.06	0.02862	Senp3
0.3861	6.249	0.02866	Sppl3
-0.9745	8.799	0.02866	Selenop
-0.6125	4.33	0.02867	Slc39a7
-0.3565	7.767	0.02867	Lamp2
0.314	7.945	0.02868	A330023F24Rik
-0.5711	3.915	0.02868	Mrpl15
0.3761	4.961	0.02876	Wdr35
0.4602	4.689	0.02881	Taf4
0.5898	6.895	0.02882	Dennd4a
0.3636	6.678	0.02882	Umad1
0.3672	5.236	0.02893	Nup153
0.7914	3.344	0.02896	Scarb1
-1.49	1.052	0.02897	Prss50
0.5578	5.697	0.02904	Cnot6l
-0.4871	4.403	0.02905	Hdgf
-0.757	3.057	0.02905	Spr
-1.256	4.888	0.02906	Grm5
-0.9329	1.723	0.02927	Tmub1
0.6465	4.724	0.02928	Apaf1
-1.15	1.318	0.02929	4932702P03Rik
-0.6533	4.152	0.02939	Psmd8
-0.7067	3.207	0.02939	Iglon5
0.4093	4.506	0.02941	Secisbp2
-0.5132	7.553	0.02948	Cd47
-0.555	3.866	0.02948	Rbm42
-0.5775	3.539	0.0295	Mmp15
0.2981	6.614	0.02959	Tasor
-0.4598	4.561	0.0296	Uqcrh
-0.9985	2.011	0.02962	Mrpl34
-0.4259	5.33	0.02962	H13
0.5687	9.099	0.02964	Plcl1
-0.4	4.864	0.02964	Kyat3
-0.4936	4.157	0.02964	Eef1d
0.5017	7.052	0.02964	Atosa
-0.3393	5.004	0.02964	Mpv17l
-0.692	3.933	0.02964	BC031181
-0.6069	4.897	0.02971	Ldha
1.822	4.093	0.02988	Prkcd
0.6561	6.202	0.02997	Capzb
-0.6384	3.709	0.03002	Cdipt
-0.5962	4.421	0.03002	Adh5
0.6944	3.187	0.03003	Rhbdl3
0.2694	7.4	0.03006	Bltp1
-0.3654	5.302	0.03012	Txnl1
0.3721	6.243	0.03015	Rnf38
0.3092	6.499	0.03019	Epc2
0.429	4.23	0.03022	Cep104
-0.9021	1.541	0.03022	Star
0.2799	6.643	0.03025	Hectd4
-0.4983	3.657	0.03025	Cbx4
0.3424	5.818	0.03025	Dhx9
-0.5948	6.089	0.03025	Dok6
0.3268	7.436	0.03027	Babam2
0.8766	1.98	0.03032	Kif17
0.95	1.088	0.03032	Arhgef5
-0.5438	3.761	0.03032	Srp19
0.4058	4.477	0.03032	Alg9
-0.6744	2.719	0.03032	Efna2
-0.398	4.418	0.03032	Smu1
-0.3397	7.137	0.03041	Chpt1
-0.7026	5.586	0.03043	Gm48747
0.798	3.933	0.03046	Gm45837
0.3315	5.796	0.03046	2010315B03Rik
-0.9123	2.511	0.03046	Zfp457
-0.3748	6.213	0.03055	Tpp1
-0.4668	4.165	0.0306	Eif3l
-1.842	1.372	0.0306	Eno1b
-1.512	0.959	0.0306	Lratd1
0.3906	4.312	0.03065	Zfp420
0.3625	5.202	0.03066	Ppp6r1
-0.484	4.967	0.0307	Pdk4
0.3343	6.428	0.0307	Dnm3
0.5115	4.25	0.0307	Zdhhc13
0.3143	6.237	0.0307	Slc30a9
-0.9982	4.273	0.03071	4930447K03Rik
-0.4406	6.308	0.03072	Snx12
-1.033	1.568	0.03072	Hras
-0.3192	5.935	0.03077	Bicd2
0.5547	7.119	0.03077	Rptor
0.3567	5.486	0.03086	Ccdc66
-0.7164	13.84	0.03102	Cmss1
1.737	0.8299	0.03109	Gm3055
-0.4411	5.083	0.03109	Fbxo30
0.4451	4.482	0.03112	Thumpd3
0.6828	5.429	0.03112	Klhl2
-0.5427	3.123	0.03112	Mrpl50
-0.6771	3.29	0.03112	ENSMUSG00000119959
-0.7173	2.923	0.03127	Sycp3
-0.6208	3.287	0.03133	Cryab
-0.3992	5.379	0.03133	Atp6ap2
0.3455	5.217	0.03133	Trmt1l
0.2961	8.348	0.03133	Fto
1.02	1.282	0.03133	Saxo2
0.314	8.102	0.03133	Huwe1
-0.5308	5.385	0.03134	Sox8
-0.4183	4.265	0.03138	Psma4
0.4113	3.851	0.03138	Pprc1
1.237	4.321	0.03138	Pbx3
-0.4623	3.679	0.03138	Yae1d1
0.7487	2.781	0.03141	Adamts10
0.3986	6.972	0.0315	Smg6
-0.4695	4.534	0.0315	Ptdss2
-0.4603	4.355	0.0315	Fbxo21
0.3669	6.532	0.0315	Taf15
0.432	5.826	0.0315	Ddi2
0.314	7.72	0.03159	Setd5
0.429	5.039	0.03161	Wwp2
0.307	5.487	0.03166	Nup93
-0.6659	2.853	0.03169	Polr2g
-0.7153	1.924	0.03175	C030006K11Rik
-0.4274	7.512	0.03175	Dkk3
-0.5638	3.456	0.03175	Inhbb
-0.5578	3.856	0.03175	Bet1
-0.466	5.24	0.03181	Dbp
-0.8625	4.814	0.03182	Hopx
-1.31	3.95	0.03182	Hmgcs2
0.3483	5.527	0.03182	Thoc1
0.3426	7.19	0.03182	2210408I21Rik
0.4478	3.934	0.03183	Exosc7
-0.4904	4.829	0.03184	Dstn
0.291	6.896	0.03185	Ube2h
-0.4003	4.154	0.03187	Hikeshi
0.3328	5.836	0.03187	Wdr37
-0.5702	3.126	0.03195	Rundc3a
-0.4463	4.033	0.03197	Syvn1
0.3519	6.134	0.03202	Tut7
-0.5799	3.603	0.03203	Tbcb
0.279	7.451	0.03226	Ubr3
-0.6758	5.394	0.03226	Dhrs7
0.501	5.238	0.03226	Pdgfd
-0.3192	7.03	0.03226	Asah1
-1.189	2.246	0.03226	Ptpn5
0.5416	6.715	0.03226	Akap13
0.3376	5.48	0.03232	Morc2a
0.2764	6.981	0.03232	Wdr7
-0.4063	5.27	0.03238	Ttr
0.7228	5.191	0.03238	Lss
-0.5603	6.468	0.03248	Hectd2os
0.53	4.534	0.03249	Nkd1
0.3613	6.415	0.03259	Rps6ka3
0.7394	6.264	0.0326	Pvt1
0.3076	8.041	0.03263	Prkce
0.6577	3.407	0.03263	Hspbp1
-0.53	5.93	0.03266	Bhlhe40
0.3342	5.288	0.03266	Ccdc191
[truncated: 55,011 more rows]

## Sheet: DE-2_Astrocytes
logFC	AveExpr	p_val_adj	gene_names
5.199	6.081	0.0001912	Atp8a2
-2.746	5.674	0.0001912	Klhdc7a
-3.166	4.005	0.0001912	Olig2
-3.376	6.081	0.0001912	Ubc
-3.189	4.321	0.0002173	Gas1
-2.721	4.177	0.0002847	Cbr3
-2.626	4.478	0.0002847	Cox5b
-2.86	4.805	0.0003084	Hspa2
-2.841	4.522	0.0003084	Tuba4a
-2.64	4.108	0.0003084	Cycs
-3.126	5.788	0.0003084	Igfbp2
-2.943	5.035	0.0003178	Cmtm5
-2.844	5.786	0.0003178	Pygm
-2.902	5.076	0.0003213	Fam181b
-2.637	4.181	0.0003213	Mgst1
-2.247	6.129	0.0003213	Mdh1
-3.217	6.062	0.0003213	Fzd2
-2.396	5.716	0.0003213	Pmm1
-2.594	3.893	0.0003213	Uqcr10
-2.995	4.871	0.0003213	Enho
-2.675	4.501	0.0003213	Uqcr11
-2.165	5.148	0.0003213	Cox7b
-3.124	3.768	0.0003213	Adora2b
-2.416	5.052	0.0003213	Entpd2
-1.94	6.473	0.0003213	Cadm4
-2.554	4.037	0.0003213	Rlbp1
-2.155	5.95	0.0003213	Emc3
-1.812	5.377	0.0003213	Wnt7a
-2.801	7.17	0.0003213	Myorg
-1.79	5.37	0.0003213	Irf2bpl
-2.53	5.419	0.0003213	Spry2
-2.515	3.908	0.0003213	Jagn1
-1.862	6.743	0.0003213	Cnn3
-2.286	4.52	0.0003213	Rraga
-1.95	6.95	0.0003213	Actg1
-2.367	4.375	0.0003213	Nat8f4
-2.958	4.923	0.0003213	Hes5
-3.335	4.465	0.0003213	Mdk
-2.048	5.335	0.0003213	Wfs1
-2.775	5.022	0.0003213	S100a16
-2.968	4.069	0.0003213	Dmp1
-2.275	4.249	0.0003213	Bmyc
-2.6	3.786	0.0003213	Gsta4
-3.269	4.749	0.0003213	Fbxo2
-1.8	6.33	0.0003213	Rpn1
-2.608	4.796	0.0003213	Fabp5
-2.886	3.538	0.0003213	1700010K23Rik
-2.146	5.462	0.0003213	Atp5h
-2.226	4.682	0.0003213	Ndufa8
-2.36	5.8	0.0003213	Ccdc190
-2.879	5.61	0.0003213	Lcat
-2.099	4.13	0.0003213	Pgap4
-2.564	5.042	0.0003213	Tst
-2.554	3.931	0.0003213	Chil1
-2.291	5.898	0.0003213	Selenos
-2.341	5.27	0.0003213	Tubb4b
-2.49	5.923	0.0003213	Timp4
-2.49	5.088	0.0003213	Atp5o - ENSMUSG00000022956
-2.47	3.873	0.0003213	Smim45
-1.576	5.419	0.000324	Abhd4
-2.977	6.677	0.0003295	Sox2
-2.521	5.091	0.0003295	Ndufb9
-2.305	5.243	0.0003295	Serpinh1
-2.407	5.284	0.0003295	Pdpn
-2.407	5.217	0.0003295	Lgalsl
-2.817	5.449	0.0003295	Lxn
-1.892	7.729	0.0003295	Slc38a3
-2.936	7.287	0.0003295	Gstm1
-2.504	5.142	0.0003295	Ndufa4
-2.039	6.297	0.0003295	Slc6a9
-3.453	5.262	0.0003295	Chchd10
-1.857	5.891	0.0003307	Slc48a1
-1.302	5.979	0.0003345	Rhobtb3
-2.63	7.194	0.0003345	Cldn10
-2.611	4.498	0.0003384	Cisd1
-2.554	7.66	0.0003384	Cxcl14
-1.851	5.764	0.0003384	Pou3f2
-2.802	6.081	0.000346	Ubqln2
-1.81	4.991	0.000346	Cox6a1
-1.987	5.192	0.000346	Tmem100
-1.532	13.19	0.000346	Lars2
-2.373	4.093	0.000346	Atp6v0e2
-1.609	6.418	0.0003505	Saraf
-2.602	5.744	0.0003505	Btbd17
-1.829	4.211	0.0003505	Clpp
-2.595	4.546	0.0003505	Zcchc18
-2.877	3.944	0.0003505	Olig1
-2.987	4.018	0.0003505	Crip2
-2.148	6.287	0.0003505	Tlcd1
-2.324	5.971	0.0003505	Elovl2
-1.334	9.49	0.0003516	Gm15564
-2.477	4.408	0.0003516	S100a13
-1.52	6.723	0.0003614	Acot11
-2.805	3.843	0.0003763	Tmem256
-2.556	5.506	0.0003763	Rdh11
-1.978	4.857	0.0003804	Apln
-2.351	4.487	0.0003807	Nat8f1
-3.325	3.729	0.0003807	Cavin3
-2.021	5.4	0.0003811	Tfrc
-1.841	6.481	0.0003811	Psat1
-2.556	7.143	0.0003811	Slc25a4
-2.023	4.804	0.0003811	Ndufa13
-2.167	3.456	0.0003875	Pno1
-2.259	4.646	0.0003875	Cox7a2
-2.22	5.424	0.0003897	B3galt2
-2.294	3.76	0.0003939	Cdc42ep1
-2.418	4.717	0.0003964	Atp5g3
-2.085	5.782	0.0004118	Slc22a17
-2.333	4.382	0.0004118	Pja1
-2.619	4.068	0.0004118	Ndufc1
-1.739	5.437	0.0004118	Aldh5a1
-1.859	4.702	0.0004118	Uqcrh
-3.27	7.248	0.0004118	Mt3
-2.123	4.823	0.0004118	Atp5d
-1.627	4.269	0.0004149	Ssr2
-2.762	2.882	0.0004149	Timm8b
-1.885	7.03	0.0004149	Eif1
-2.434	4.833	0.0004149	Ndufb10
-1.899	4.771	0.0004149	Pcdhga12
-1.768	5.413	0.0004149	Slc12a4
-2.192	4.986	0.0004149	Cnih1
-1.264	6.071	0.0004149	Abhd6
-2.786	3.787	0.0004149	Fkbp10
-1.764	7.446	0.0004149	Ldhb
-1.704	6.652	0.0004149	Scara3
-1.403	4.823	0.0004149	Etfdh
-1.358	5.644	0.0004149	Gnb2
-2.235	5.017	0.0004149	AW047730
-2.8	4.741	0.0004149	Nrarp
-1.657	5.268	0.0004149	Mmut
-2.001	4.125	0.0004149	Rnf5
-1.96	5.832	0.0004149	Pdk2
-2.523	5.361	0.0004149	Enpp5
-2.113	5.915	0.0004149	Lhx2
-4.253	2.445	0.0004189	Gm6166
-1.701	4.423	0.0004189	Ptpmt1
-1.822	8.049	0.0004189	Calm1
-3.074	4.897	0.0004189	Uqcrfs1
-2.313	4.919	0.0004189	Cyc1
-1.978	6.831	0.0004189	Atp5pb
-3.496	2.9	0.0004189	Tmem35a
-1.919	4.288	0.0004189	Smpd2
-2.272	5.117	0.0004232	Ppp1r1b
-1.998	7.557	0.0004237	Atp5b
-2.113	4.289	0.0004249	Gcsh
-2.363	5.87	0.0004273	Cox8a
-1.766	4.902	0.0004273	Fkbp4
-1.623	4.799	0.0004296	Eif1ax
-2.179	5.466	0.0004307	Cox6c
-2.281	7.635	0.0004358	Syt11
-2.013	5.661	0.0004358	Oaf
-2.104	4.839	0.0004516	Degs1
-2.477	4.964	0.0004616	Sox1
-2.515	10.08	0.0004643	Gja1
-2.358	9.077	0.0004694	Prnp
-2.456	4.68	0.0004696	Sod3
-1.731	4.491	0.0004711	Pttg1
-2.605	4.094	0.0004711	Ndufb11
-1.971	6.235	0.0004727	Cox4i1
-2.572	6.082	0.0004753	Omg
-2.216	7.264	0.0004762	Tspan3
-2.072	6.95	0.0004762	Eno1
-2.098	4.221	0.0004832	Ndufb2
-2.036	4.376	0.0004832	Hes1
-1.994	8.138	0.0004832	Ednrb
-1.735	5.766	0.0004832	Mdh2
-1.189	7.122	0.0004902	Jam2
-1.997	5.583	0.0004932	Papss2
-1.611	5.706	0.0004932	Sall2
-1.593	4.55	0.0004988	Rab5if
-2.051	6.584	0.0004993	Slc25a5
-2.569	3.825	0.0004993	Thy1
-2.278	4.488	0.0004993	Nap1l5
-1.576	5.497	0.0005029	Wnt7b
-2.269	5.978	0.0005107	Tubb2a
-1.497	6.132	0.0005126	Chst1
-1.979	4.901	0.0005126	Ndufv3
-2.423	6.87	0.0005126	Aplp1
-2.102	3.741	0.0005126	Fmc1
-1.37	5.224	0.0005317	Cct7
-2.417	5.344	0.0005317	Tuba1a
-1.692	8.286	0.0005336	Kcnj10
-3.046	4.359	0.0005357	Mageh1
-1.684	4.817	0.0005366	Abcb9
-2.111	5.897	0.0005366	Pfn2
-2.477	5.436	0.0005366	S100a1
-1.816	5.202	0.0005428	Slc14a1
-2.595	6.266	0.0005428	Smpdl3a
-2.283	8.268	0.0005428	Igsf8
-1.804	8.819	0.0005428	Acsl6
-1.848	5.841	0.0005608	Bhlhe40
-2.303	5.307	0.0005608	Cox5a
-1.803	6.849	0.0005619	Slc1a4
-2.328	6.96	0.000564	Slitrk2
-2.754	9.415	0.0005717	Mfge8
-1.397	6.49	0.0005718	Phgdh
-1.874	6.857	0.0005754	Slc9a3r1
-2.404	4.58	0.000576	Paqr4
-2.438	3.816	0.0005775	Tceal8
-1.806	4.681	0.0005795	Zfyve21
-2.199	4.152	0.0005803	Ppa1
-2.072	7.46	0.0005803	Gabrg1
-2.732	6.053	0.0005822	Prelp
-2.288	3.762	0.0005883	Hhatl
-1.912	7.45	0.0005883	Fasn
-1.834	4.889	0.0005883	Fgfrl1
-2.172	4.585	0.0005957	Slc35e4
-1.528	6.593	0.0005957	Tecr
-1.969	7.126	0.0005957	Grina
-2.434	5.323	0.0005957	Gpr37
-2.511	5.05	0.0005957	Rgcc
-1.426	5.644	0.0005957	Map1lc3b
-1.265	5.048	0.0005957	Zfp606
-1.745	7.048	0.0005957	Abhd3
-2.319	4.554	0.0005957	Atp5md
-2.414	6.184	0.0006025	Nkain4
-1.652	4.649	0.0006025	Ndufv1
-2.575	6.548	0.0006025	Tubb2b
-1.478	4.852	0.0006025	Gnl3l
-1.792	5.496	0.0006025	Atp5j
-2.087	6.612	0.0006025	Atp1b1
-1.637	4.796	0.0006025	Slc30a1
-2.019	4.914	0.0006025	Etfb
-2.381	8.708	0.0006055	Ckb
-2.344	4.327	0.0006055	Ndufa5
-1.738	8.625	0.0006238	Acsbg1
-3.317	3.177	0.0006238	Ddt
-1.766	5.972	0.0006238	Kcna2
-2.082	4.586	0.0006238	Eif1b
-1.726	5.797	0.0006238	Ppia
-2.555	9.015	0.0006255	Gpr37l1
-4.526	4.805	0.0006255	Gm48606
-2.347	8.34	0.0006297	Tril
-1.486	5.272	0.0006394	Rab9
-2.653	4.107	0.0006394	Fzd1
-1.667	4.674	0.0006433	Yipf3
-2.479	3.073	0.0006433	Mien1
-2.401	5.318	0.0006451	Smpd1
1.18	6.508	0.0006518	Mark2
-2.869	3.441	0.0006518	Cd320
-2.934	4.716	0.0006564	Hopx
-1.776	3.927	0.0006629	Aph1b
-2.663	3.322	0.0006629	Inhbb
-2.338	3.962	0.0006629	Ndufb6
-2.489	6.822	0.0006629	Agt
-1.538	6.973	0.0006629	Pcdh17
-2.578	5.568	0.0006635	Mfsd2a
-1.857	4.568	0.0006663	Dipk1c
1.482	8.429	0.0006694	Magi1
-2.231	3.326	0.0006708	Gadd45g
-2.853	3.704	0.0006741	Slc35g2
-1.658	6.723	0.0006741	Srebf1
-1.876	4.108	0.0006815	Lrtm2
-1.954	5.853	0.0006815	Naaa
-1.565	5.296	0.0006815	Gabarapl1
-1.675	6.337	0.0006815	Mmp14
-2.114	5.167	0.0006815	Sox8
-2.343	6.96	0.0006815	Pcdhgc3
-1.244	6.31	0.0006815	Ak3
-1.999	5.534	0.0006815	Hgf
-2.056	4.735	0.0006816	Uqcrb
-2.013	7.094	0.0006845	Rcn2
-1.668	4.856	0.0006891	Ikbip
-2.664	3.354	0.0006947	Elovl4
-2.337	3.984	0.0006947	Hey1
-1.246	9.032	0.0007008	Serpine2
-1.639	6.261	0.000703	Cat
-1.567	5.89	0.000703	Uqcrc1
-1.656	5.284	0.000703	Tmem176a
-1.649	7.247	0.000703	Atp5a1
-1.64	8.169	0.000703	Ntsr2
-2.161	5.546	0.000703	Ndufc2
-1.776	4.943	0.000703	Glo1
-1.433	7.246	0.000703	Cs
-2.035	4.951	0.0007144	Nr2f1
-2.468	4.042	0.0007158	Pcdhgb7
-1.873	6.02	0.0007197	Ubb
-1.481	4.429	0.0007197	Gna11
-2.231	3.593	0.0007197	Tmem60
-2.604	4.635	0.0007197	Sox21
-1.57	7.902	0.0007197	Hspa8
-1.424	9.729	0.0007197	Slc6a11
-1.257	6.479	0.0007197	Ssr3
-1.497	4.794	0.0007197	Hgsnat
-2.126	5.709	0.0007221	Clip3
-2.048	4.912	0.0007232	B4gat1
-2.313	3.989	0.0007339	Fundc2
-2.693	4.635	0.0007353	Pou3f4
-1.278	7.707	0.0007353	Abat
-1.74	4.733	0.0007353	Rnf215
-2.015	3.985	0.0007353	Amigo1
-1.864	3.898	0.0007364	Gdpd2
-3.275	6.767	0.0007364	Gstm5
-1.505	4.686	0.0007364	Mpdu1
-2.022	5.676	0.00075	Dhrs7
-1.89	5.61	0.0007527	Paics
-1.72	5.311	0.0007534	Kdelr1
-1.612	4.611	0.000755	Septin4
-1.894	4.223	0.000755	Elob
1.508	5.814	0.000755	Gm4258
-1.775	4.379	0.000755	Arl2bp
-1.567	3.855	0.000755	Spry4
-1.999	3.614	0.000755	Mrps34
-2.908	7.85	0.000755	Mt1
-1.893	4.261	0.0007622	Gpd1
-1.899	5.77	0.0007624	Phyh
-1.398	4.957	0.0007624	Cwc15
-1.926	4.283	0.0007672	Gatd3a
-1.836	4.117	0.0007672	Vegfb
-2.118	3.449	0.0007682	Banf1
-2.079	4.966	0.0007682	H2bc4
-1.405	5.686	0.0007682	Klhl9
-1.641	7.342	0.0007682	Agpat5
-1.308	4.692	0.0007682	Ppt2
-1.927	6.1	0.0007703	Tmem229a
-1.288	7.849	0.0007723	Itm2c
-2.767	3.955	0.0007743	Sfrp5
-2.165	3.824	0.000776	Ndufa3
-1.244	5.713	0.0007824	Sdhb
-1.495	5.054	0.0007824	Rida
-2.335	6.944	0.0007824	Id2
-2.003	8.587	0.0007867	Aqp4
-1.727	4.598	0.0007877	Gpx4
-1.764	4.408	0.0007877	Dhrs1
-2.419	3.552	0.0007931	Arxes2
-2.367	4.195	0.0008056	Uqcrq
-1.65	5.159	0.0008056	Atraid
-2.391	9.474	0.0008056	S1pr1
-1.491	5.275	0.0008056	Ndufs2
-1.238	5.005	0.0008056	Kdelr2
-2.41	10	0.0008056	Atp1b2
-1.297	5.22	0.0008183	Pigt
-1.418	6.42	0.0008218	Cpt1a
-1.51	7.485	0.0008325	Laptm4a
-2.308	4.348	0.0008325	Mif
-2.253	3.424	0.0008325	Dolk
-1.9	4.589	0.0008325	Atp5j2
-1.73	4.476	0.000834	Selenon
-2.249	6.6	0.000834	Kcnj16
-3.076	3.014	0.000834	Ficd
-1.49	6.139	0.000836	Aldh2
-1.832	3.831	0.000836	Pdcd5
-2.063	4.099	0.000836	Prdx3
-2.711	4.116	0.0008395	Mfrp
-1.398	6.304	0.0008445	Hsp90aa1
-1.794	4.519	0.0008672	Mmgt1
-1.755	3.878	0.0008672	Cyp2u1
-3.154	6.489	0.0008672	Mt2
-1.532	4.682	0.0008672	Tex264
-1.647	5.542	0.0008691	Echs1
-1.548	4.572	0.0008959	Pigp
-2.858	9.733	0.0008968	Aldoc
-2.027	5.723	0.0008968	Fxyd1
-1.868	9.617	0.0008968	Htra1
-1.234	5.829	0.0008971	Acadm
-1.256	5.735	0.0008995	Pnkd
-1.244	5.319	0.0008995	Psmd2
-1.381	5.757	0.0009077	Calm3
-2.023	4.706	0.000915	Edf1
-1.917	6.199	0.0009237	Tpi1
-1.815	7.551	0.0009246	Mlc1
-1.604	6.065	0.0009248	Slc2a1
-1.782	6.679	0.0009317	Pfkm
-2.111	11.78	0.0009332	Atp1a2
-1.533	4.872	0.0009332	Dynlrb1
-2.133	4.452	0.0009421	Tm2d2
1.596	6.313	0.0009446	Mrtfa
-1.811	6.459	0.0009446	Skp1
-1.293	7.837	0.0009446	Adgrg1
-1.362	5.344	0.0009446	Hdhd2
-1.659	5.19	0.0009446	Hspa13
-1.528	5.825	0.0009446	Pnrc2
-2.53	7.389	0.0009446	Sox9
-1.986	5.546	0.0009536	Map1a
-1.358	4.713	0.0009536	Emc10
-0.9695	7.439	0.0009536	Slc7a10
-1.46	6.048	0.0009536	Wbp2
-1.869	4.466	0.0009557	Gabarapl2
-1.544	6.847	0.0009557	Lfng
-1.373	6.925	0.0009557	Sqstm1
-1.242	6.953	0.0009557	Tmed5
-1.8	7.231	0.0009557	Aldoa - ENSMUSG00000030695
-1.912	8.443	0.0009595	F3
-1.284	5.936	0.0009656	Cluh
-1.534	7.546	0.0009766	Hacd3
-1.824	7.543	0.0009804	Phyhipl
-1.94	7.496	0.0009958	Pou3f3
-1.411	7.339	0.001009	Slc3a2
-1.494	5.803	0.001009	Lrrc4b
-1.494	5.791	0.00101	Nlgn3
-1.727	4.623	0.001013	Cacybp
-1.829	5.341	0.001017	Ginm1
-1.712	5.601	0.00102	Epdr1
1.081	6.925	0.001025	Psme4
-2.78	3.855	0.001025	Cend1
-2.154	4.124	0.001028	Ndufb7
-1.56	5.253	0.001028	Idh3b
-1.66	5.466	0.001029	Trib2
-1.778	5.616	0.001029	Selenok
-1.666	5.905	0.001029	Tmco1
-1.092	7.184	0.001029	Sesn3
-1.482	3.811	0.001033	Tmem9
-1.657	11.64	0.001033	Apoe
-1.719	4.266	0.001039	Hint1
-1.688	10.55	0.001042	Plpp3
-1.337	5.466	0.001044	Kifbp
-1.98	5.426	0.001045	Tmx2
-2	3.417	0.001045	Mrpl47
-1.538	6.457	0.001053	Tkt
-1.639	8.131	0.001053	Serinc1
-2.518	5.076	0.001053	Chchd2
-1.769	4.513	0.001065	Dbndd2
-1.498	5.804	0.001065	Hsdl2
-1.381	4.857	0.001065	Eif3d
-1.953	6.949	0.001072	Mid1ip1
-1.075	6.05	0.001077	Atad1
-1.138	5.758	0.001078	Fstl1
-1.402	5.014	0.001078	Psmd6
-1.673	5.118	0.001078	Tmem9b
-2.049	11.33	0.001078	Sparcl1
-2.331	3.402	0.001078	Ccdc32
-2.363	7.007	0.001078	Fjx1
-1.783	4.121	0.001078	Naxe
-2.046	6.596	0.001078	Pcdh1
-1.392	5.809	0.001083	Zfp24
-2.632	10	0.001083	Clu
-2.165	3.666	0.001083	Atp5e
-1.27	6.714	0.001083	Cnbp
-1.302	17.17	0.001083	Rn18s-rs5
-1.641	4.402	0.001083	Cdipt
-2.1	3.908	0.001103	1810037I17Rik
-1.582	4.627	0.00111	Ndufa6
-2.545	4.149	0.00111	Ppp1r3g
-1.709	4.165	0.00111	Cyp4f14
-1.799	3.607	0.001113	Gdf10
-1.847	3.642	0.00112	Slc35b1
-1.679	5.063	0.00112	Dbp
-1.261	4.493	0.001122	Ptdss2
-1.212	5.168	0.001123	Syn3
-1.936	5.871	0.001123	Dnajb9
-2.229	5.231	0.001123	Prdx2
-1.988	10.75	0.001123	Glul
-1.84	4.942	0.001124	Caskin2
-1.247	5.261	0.001124	Sod2
-1.608	7.97	0.001126	Fgfr3
-1.431	7.815	0.001126	Baalc
-1.432	7.416	0.001126	Fgfr1
-1.656	5.165	0.001151	Adh5
-2.132	4.045	0.001152	Igsf1
-1.748	5.127	0.001152	Idh3a
-1.223	6.092	0.001152	Uba1
-1.043	6.399	0.001152	Gpr146
-1.622	6.897	0.001168	Slc41a1
-2.199	3.229	0.00117	Mrpl32
-1.478	6.049	0.00117	Vdac1
-1.74	4.879	0.00117	Pcdhgc5
-1.69	8.144	0.001191	Fads2
-2.268	8.99	0.001191	Scg3
1.064	6.047	0.001201	Ksr1
1.376	6.351	0.001203	Nlk
1.057	7.77	0.001203	Prkce
-1.683	3.959	0.00121	Irf2bp1
-1.703	8.382	0.001212	Timp3
-1.781	5.74	0.001216	Lmo4
-1.778	9.256	0.001216	Ttyh1
-1.098	6.985	0.001217	Tmed10
1.627	5.344	0.00122	Rilpl1
-1.574	4.934	0.001222	Mpc2
-1.531	4.994	0.001222	Ggh
-2.001	8.746	0.001239	Pla2g7
-1.27	5.27	0.001239	Psmc1
-1.633	7.689	0.001239	Mfap3l
-1.515	4.637	0.001239	Cstf2
-1.725	6.824	0.001279	Prdx1
-1.117	7.122	0.001279	Spacdr
-1.218	4.41	0.001279	Ahsa1
-1.122	7.948	0.001282	Aplp2
-1.802	3.478	0.001288	Psenen
-1.772	4.318	0.001288	Ddr1
-1.394	4.58	0.001296	Smim15
-1.199	4.525	0.001297	Tmem259
-1.292	4.54	0.001298	Epm2aip1
-1.352	4.097	0.001303	Prelid3b
-2.036	5.853	0.001303	2900052N01Rik
-1.568	3.776	0.001303	Mrpl45
-1.649	7.609	0.001317	Csrp1
-2.701	2.949	0.001317	1700003M07Rik
-1.198	6.679	0.00132	Hsd17b12
-1.648	4.879	0.00132	Ankrd29
-1.918	6.287	0.001327	Chrdl1
-1.459	5.691	0.00133	Prkcsh
-2.031	4.399	0.00133	Pgp
-2.135	6.826	0.00133	Car2
-1.915	4.233	0.001335	Ndufb3
-1.4	6.189	0.001351	Maob
-2.414	5.835	0.001352	S100b
-2.248	4.092	0.001357	Idi1
-1.15	5.366	0.001357	Mettl7a1
-1.666	4.757	0.001357	D030047H15Rik
-1.647	4.152	0.001357	Srp14
-1.132	6.48	0.00136	Ghitm
-1.527	7.181	0.001369	Pcdhgc4
-1.311	5.286	0.001369	Alg2
-1.926	4.143	0.001369	Ndufs7
-1.603	4.789	0.001381	Rdh5
-1.663	11.25	0.001387	Slc1a3
-1.362	11.1	0.001394	Cst3
-2.428	4.482	0.001407	Atp5k
-1.267	4.875	0.001416	Dvl3
-1.28	7.224	0.001421	Aco2
-1.726	4.452	0.001421	BC031181
-1.3	6.336	0.001423	Hk1
-1.879	7.687	0.001423	Gjb6
-1.381	5.967	0.001423	Hspd1
-1.656	6.484	0.001432	Pdha1
-2.018	3.355	0.001432	Taf9b
-1.724	5.454	0.001432	Prpf19
-1.271	5.875	0.001437	Ppp2r1a
-1.563	3.788	0.001447	Selenbp1
-1.659	4.039	0.001476	Ndufb1
-1.158	5.792	0.001476	Flrt2
-1.944	5.845	0.001483	Emc7
-1.85	4.567	0.001483	Park7
-1.083	7.656	0.001488	Soat1
-1.812	5.145	0.001492	Foxg1
1.59	7.031	0.001493	Parp8
-1.265	5.934	0.001493	Wscd1
-1.53	4.538	0.001495	Psph
-1.06	5.379	0.001495	Abca2
-1.55	3.467	0.001506	Nme1
1.404	9.036	0.001527	Zeb2
-0.9191	6.029	0.001527	Arl8a
-2.113	8.47	0.001529	Prdx6
1.188	7.546	0.001529	Cdk14
-1.45	5.284	0.001535	Bdh1
-1.587	4.611	0.001536	Slc25a11
-1.592	4.065	0.001558	Txn1
-1.349	4.513	0.00157	Sigmar1
-1.802	5.675	0.001575	Kbtbd11
-1.208	5.333	0.001575	Cers1
-1.402	4.95	0.001575	Glrx2
-1.839	5.871	0.001589	Dhcr24
-1.305	7.149	0.001589	Stt3b
-1.288	6.975	0.001589	Slc7a2
-1.289	5.684	0.001594	Tlcd4
-0.9341	7.543	0.001609	Pbxip1
-1.968	7.573	0.001619	Gapdh
-1.76	4.102	0.001622	Enpp4
-1.138	5.007	0.001622	Plxna2
-2.03	3.584	0.001622	Cops9
-2.189	7.012	0.001622	Prxl2a
1.6	6.15	0.001626	Slc12a2
-1.463	6.08	0.001626	Idh1
-1.864	4.758	0.001629	Acaa2
-1.082	7.348	0.001631	Aldh1l1
-1.071	7.995	0.001638	Hsp90ab1
-1.449	4.336	0.00164	Asf1a
-1.667	6.258	0.001644	Dhcr7
-2.111	4.274	0.001654	Smdt1
-1.315	4.77	0.001668	Ostc
-1.216	5.364	0.001672	Vdac3
-2.045	4.4	0.001672	Fndc4
-1.415	8.155	0.001675	Slc27a1
-1.312	5.436	0.001679	Tspan31
-1.135	5.01	0.001679	Adora1
-1.553	4.819	0.001679	Slc16a2
-1.633	6.345	0.001679	Cyp2j6
-1.264	5.07	0.001679	Manf
3.907	3.057	0.001699	Cybb
-2.138	3.817	0.00171	Cryab
-1.631	5.824	0.00171	4933431E20Rik
-1.162	5.257	0.001728	G6pdx
-1.602	4.466	0.001732	Tmem115
-1.458	4.464	0.00174	Hexim1
-1.12	6.502	0.00174	Bicd1
-1.843	3.862	0.001743	Mrps14
-1.462	4.322	0.001762	Tpmt
-1.219	5.602	0.001769	Bpnt2
-1.036	4.818	0.001769	Txndc9
-1.518	3.985	0.001772	Fah
-2.04	4.165	0.001772	Psmb4
-1.692	4.743	0.001772	Gm37885
-1.629	3.487	0.001778	Surf1
-1.562	7.222	0.001786	Dag1
-1.235	6.241	0.001793	Pttg1ip
-1.351	7.116	0.001794	Bsg
-1.057	4.64	0.001794	Oxa1l
-1.691	4.557	0.001806	Sccpdh
-1.766	4.601	0.001807	Cox6b1
0.8922	6.926	0.00181	Tcf20
-2.397	4.305	0.001818	Id3
-1.939	8.598	0.001822	Cspg5
-2.22	6.371	0.001827	Dbi
-2.126	3.814	0.001838	Ndufa2
-1.376	6.197	0.00185	Hadhb
-1.84	6.459	0.00185	Aldh6a1
-1.291	6.215	0.00185	Uqcrc2
1.159	7.264	0.001858	Slc12a6
-1.774	3.249	0.001861	Jmjd8
-1.938	4.065	0.001867	Cbr1
-1.238	4.721	0.001873	Psma4
-2.135	4.832	0.001873	Dynll1
-1.221	7.308	0.001873	Cntfr
-1.922	3.398	0.001877	Mrpl41
-1.764	6.687	0.001882	Nr1d1
1.098	6.042	0.001894	Fbxw7
-1.476	4.96	0.001894	Syf2
-1.705	5.526	0.001909	Cnp
-1.331	5.216	0.001909	Maoa
-2.338	4.094	0.001914	Gstk1
-1.602	3.962	0.001918	Gtf2h5
-1.47	3.655	0.001935	Terf2ip
-1.41	6.952	0.001936	Tmem106b
-1.333	4.787	0.001943	Fam217b
-1.484	8.827	0.001976	Slc6a1
-1.445	3.972	0.001977	Map7d2
-1.654	4.044	0.001984	2810459M11Rik
-2.311	5.13	0.001987	Hsd11b1
-1.357	6.414	0.00199	Paqr7
-1.567	8.267	0.002002	Hepacam
-1.625	4.515	0.002002	Ndufb8
-1.245	5.151	0.002018	Psma2
0.9669	8.238	0.002029	Pid1
-1.339	6.824	0.002031	Pgm1
-1.217	6.37	0.002037	Hspa9
-1.48	7.409	0.002037	Sdc4
-1.521	5.056	0.002037	Sod1
-1.332	4.746	0.002042	Ppp2r5d
-1.279	5.058	0.002042	Psma6
1.156	7.788	0.002058	Zcchc7
-0.902	6.931	0.002064	Clcn3
-1.337	6.062	0.002064	Golm2
-1.186	6.349	0.002064	Ramp1
-1.593	4.156	0.002072	Pqbp1
-1.174	4.899	0.002074	Hs3st3a1
-1.406	5.632	0.002076	Ppib
-1.086	6.835	0.002076	Sec62
-1.684	4.87	0.002076	Flrt1
-1.088	6.036	0.002076	Zmpste24
-1.237	4.904	0.002091	Eapp
-1.405	7.548	0.002091	Ncan
-1.491	4.534	0.002091	Scamp3
-1.874	3.468	0.002091	Pcdhga11
-1.116	5.264	0.002126	Uba3
-1.62	4.161	0.002129	Mpp2
-1.783	5.387	0.00215	Fkbp3
-1.272	3.909	0.00215	Cibar1
1.121	6.713	0.002153	Sgms1
-1.533	3.662	0.002157	Cib1
-1.533	5.002	0.002158	Sfr1
1.077	6.225	0.002177	Iqsec2
-1.831	4.697	0.00219	Ptov1
-1.854	5.794	0.002193	Fez1
-1.874	5.882	0.002203	Celsr2
-1.183	6.51	0.002203	Ece1
-1.134	4.493	0.002203	Ak1
-1.844	5.807	0.002203	Gclm
-1.846	7.759	0.002209	Msmo1
-1.07	6.115	0.002218	Dazap2
-1.652	5.778	0.002221	Sc5d
-1.439	3.704	0.00223	Triqk
-1.483	4.825	0.002239	Ephb3
-1.606	4.308	0.002248	Adamts1
1.35	6.389	0.002256	Mthfs
-1.838	4.004	0.002295	Hyal1
-1.378	4.372	0.002311	Sdhd
0.8851	6.572	0.002311	Ascc3
-1.416	3.957	0.002311	Get3
-1.733	4.259	0.00234	Psmb6
-1.788	4.045	0.00234	Pcdhgb6
-1.331	7.435	0.00234	Nrxn2
0.8475	7.036	0.002343	Acaca
-1.532	3.921	0.002345	Pdcl
-0.9105	6.082	0.002368	Ndufs1
-2.069	6.958	0.002372	Vcam1
-1.213	4.971	0.002406	Psmd7
-1.667	6.409	0.002406	Fdft1
-1.297	5.906	0.002429	Atxn7l3b
-1.737	9.509	0.002429	Scd2
0.933	6.313	0.002439	Atp13a3
-1.215	6.011	0.002455	Suclg1
-1.566	6.198	0.002472	Cyp2d22
-1.874	3.525	0.002475	Dbn1
-1.209	5.197	0.002475	Gatad1
-1.96	4.756	0.002475	Metrn
0.8084	7.324	0.002479	Herc1
-1.293	4.957	0.002492	Sema6a
-2.24	3.826	0.002493	Tspyl4
-1.603	4.029	0.002517	Zrsr1
-1.589	4.375	0.002534	Llgl1
-1.295	4.618	0.002577	Alpl
-1.189	6.983	0.002579	Crot
1.068	7.667	0.002587	Kansl1
-1.681	3.658	0.002601	Psmg2
-0.9814	6.727	0.002636	Prpf8
-1.592	7.684	0.002677	Tmem47
-1.031	6.318	0.002686	Magt1
0.8241	6.981	0.002689	Ambra1
-2.092	3.131	0.002706	Lrrc75b
1.439	6.483	0.002706	Ncoa3
-1.729	4.266	0.002706	Nme2
-1.347	4.421	0.002713	Gsn
-2.161	3.783	0.002713	Ndufa11
-1.108	7.494	0.002723	Adcyap1r1
-1.084	5.908	0.002723	Tmem176b
-1.296	3.92	0.002723	Fn3krp
-1.227	6.191	0.002723	Ctsf
-0.8786	6.091	0.002729	Msi1
-1.041	5.211	0.002729	Gm49342
-1.204	5.101	0.002729	Bhlhb9
-1.18	5.622	0.002733	Cct6a
-1.365	4.602	0.002733	Snrpa
-1.967	3.777	0.002737	Krtcap2
-1.392	4.68	0.002751	Ramp2
-1.982	3.709	0.002751	Nudt19
-1.283	5.928	0.002751	Tcaf1
-1.355	4.888	0.002756	Hip1r
-1.274	5.103	0.002756	Pgrmc1
-1.253	4.996	0.002756	Laptm4b
-1.199	5.496	0.002765	Pcyox1
1.274	6.43	0.002776	Sdccag8
-1.342	4.573	0.002781	Otub1
-1.059	6.745	0.002793	Hsd17b11
-1.087	5.175	0.002796	Psmc3
0.7607	7.902	0.002798	Ncoa2
-1.564	4.319	0.002798	Spcs1
0.9408	6.645	0.002798	Kdm2a
1.192	6.575	0.002798	Rcbtb2
-1.374	7.569	0.002798	Arl6ip1
-1.317	4.014	0.002798	Slc25a1
-1.22	5.18	0.002803	Txndc5
-1.169	5.569	0.002846	Gabarap
-1.203	4.606	0.002846	Gtf2f1
-1.264	4.894	0.002848	Fat4
-1.272	4.553	0.002849	Gm11149
-1.247	5.037	0.002864	Cct5
-1.052	4.971	0.002904	Ubxn2a
-1.354	7.594	0.002905	Notch1
-1.291	7.217	0.002908	Tmem59
2.689	5.899	0.002908	Rtn4rl1
-1.207	8.138	0.002913	Pygb
-1.538	5.409	0.002913	Epha4
0.9735	7.284	0.002916	Acer3
-0.9343	7.465	0.002921	Gpld1
-0.9426	10.62	0.002921	Slc4a4
-0.8956	6.495	0.002924	Vdac2
-1.107	6.967	0.00293	Atp5c1
-1.315	4.952	0.002935	Slc39a7
-1.68	4.259	0.002942	H1f4
-1.529	4.79	0.002942	Lamb2
1.269	6.946	0.002945	Rai1
-1.31	7.357	0.002945	Fads1
-1.254	4.619	0.002988	Pcyt1b
-1.489	5.858	0.002993	Ptprf
-0.9736	5.71	0.002998	Thra
1.197	6.961	0.003032	Nrp1
-0.9565	6.344	0.003048	Ctso
-0.9746	8.282	0.003048	Eif4g2
-1.273	8.195	0.003048	Mmd2
0.9915	7.947	0.003048	Eif4g3
1.051	6.949	0.003072	Kcnq1ot1
-0.8568	7.777	0.003084	Myo10
-1.223	5.019	0.003125	Psma7
-1.499	7.106	0.003139	Gprc5b
-1.304	10.55	0.00314	Ptprz1
3.792	3.248	0.003161	Nlrc5
-1.563	6.248	0.003169	Camk2n1
-1.356	6.6	0.003169	Pfkp
-1.444	3.935	0.003173	Mrpl15
-1.533	4.864	0.003175	Cstf2t
0.9452	6.499	0.00318	Dennd1b
-1.209	6.839	0.003195	Slc25a18
-0.9554	6.729	0.003198	Ngef
-1.38	4.419	0.003199	Tmem70
-1.533	4.13	0.003201	Ift27
1.276	8.445	0.003213	Large1
-1.527	3.899	0.003214	Pebp1
-1.694	4.057	0.003234	Repin1
-2.002	4.888	0.003234	Retsat
-1.554	6.575	0.003235	Tlr3
-1.207	4.185	0.003235	Maf1
-0.8557	7.406	0.003244	Hnrnpk
-1.26	4.947	0.003253	Gys1
-1.715	3.533	0.003255	Fam216a
-1.395	4.376	0.003255	Pygo1
-1.016	4.542	0.003255	Phc1
-1.149	7.683	0.003287	Lrrc58
-1.095	4.587	0.003318	Iftap
-1.197	6.837	0.003366	Chpt1
-1.318	7.322	0.003371	Itgb8
-1.415	4.593	0.003403	Msantd4
1.206	5.341	0.003417	Tpk1
0.8256	7.167	0.003428	Nsmce2
-0.9939	6.27	0.003428	Igdcc4
-1.86	3.534	0.00345	Dnajc9
-1.047	7.364	0.00345	Tm9sf2
-1.311	3.893	0.00345	Emc4
-1.475	3.995	0.00345	Tfcp2l1
-1.025	4.666	0.00345	Brinp2
-1.152	7.273	0.00345	Tmod2
-1.047	7.716	0.00345	Kif1a
-1.426	4.507	0.003482	Acot13
1.804	5.435	0.003482	Zfp704
0.8568	7.473	0.003488	Sbf2
-0.8738	5.466	0.003491	Stard7
1.193	7.094	0.003495	Gsap
-1.142	4.91	0.00351	Ephx1
-0.9913	6.308	0.003541	Spcs2
-1.074	6.776	0.003541	Slc25a3
-1.269	5.517	0.003572	Dld
1.763	5.391	0.003572	Nrros
-1.034	8.166	0.003572	Atp2a2
-1.062	5.143	0.003576	Sbds
-1.719	7.859	0.003581	Pcdh10
-0.8016	5.876	0.003587	Rab21
-1.093	5.078	0.003592	Colgalt2
-1.332	5.631	0.003592	Slc30a10
0.964	6.225	0.003592	Zup1
0.925	6.751	0.003595	Abl2
-1.28	6.464	0.003595	Sema4b
-1.391	4.038	0.003595	Ppp1r11
-1.431	5.02	0.003627	Tspan15
-2.107	4.417	0.003627	Sfrp1
-0.83	7.082	0.003627	Pea15a
1.686	7.743	0.003631	Tns3
-1.577	8.895	0.003646	Bcan
-1.496	4.2	0.003652	Eif3g
-1.022	5.913	0.003667	Sema4a
-0.8508	5.466	0.003667	Dlat
-1.034	5.371	0.003678	Cdkn1b
1.111	6.116	0.003685	Svil
-1.258	4.232	0.003723	Blzf1
-1.565	3.495	0.003728	Mrps22
-1.513	4.747	0.00375	Sdf2
3.437	3.414	0.00375	Ccdc192
-1.168	8.262	0.003758	Slc7a11
1.091	8.668	0.003771	Diaph2
-0.8514	5.203	0.003771	Zfp260
0.9262	6.217	0.003771	Akap10
-1.662	3.645	0.003771	Kctd17
-1.272	5.295	0.003771	Polr2b
-1.632	3.626	0.003771	Fpgt
-1.409	3.74	0.003771	Tmem161a
-1.134	7.071	0.003771	Gpi1
-2.296	3.669	0.003803	Mpst
0.8435	6.493	0.003803	Kif13a
-1.307	5.532	0.00381	Itih5
-1.296	5.527	0.00382	Ldha
-1.066	6.91	0.003842	Rdx
-1.402	4.126	0.003855	Ednra
-1.284	4.172	0.003856	Qars
-1.855	6.299	0.003861	Hapln1
-1.315	6.509	0.003878	Lgi4
-1.059	5.745	0.003884	Ralgds
-1.404	3.935	0.003894	D8Ertd738e
-0.8936	5.979	0.003894	Vezf1
-1.937	5.358	0.0039	Oat
-0.97	9.799	0.003907	Selenop
1.29	6.437	0.003914	Pkn1
-0.8572	7.238	0.003925	Agl
-1.115	6.476	0.003925	Por
-0.937	5.666	0.003931	Eif2s2
2.107	6.918	0.003942	Man1c1
-1.328	5.558	0.003942	Vamp2
-1.213	6.741	0.003942	Plxnb1
-1.296	6.012	0.003942	ENSMUSG00000120081
-1.533	4.902	0.003942	Sgcb
-1.313	4.688	0.003954	Mocs2
1.451	7.533	0.003993	Pan3
-1.381	4.618	0.003996	Snrpd3
-0.9076	6.893	0.003998	Sdha
-1.603	3.91	0.004028	Rrp8
0.8997	6.084	0.004037	Lrp5
-1.066	4.951	0.00408	Snapin
0.9475	7.071	0.00408	Scaper
1.079	8.028	0.004149	Ppp1r9a
-1.072	4.362	0.004149	Ttbk2
-1.628	5.235	0.004163	Slc16a1
-1.201	3.941	0.004167	Clcn2
-1.122	5.836	0.004183	Anxa5
0.7772	8.455	0.004186	Rere
-1.398	5.287	0.004236	Ppp1r3c
-0.7839	7.843	0.004238	Gnai2
-1.106	4.207	0.004247	Zfp281
-1.09	7.844	0.00426	Hspa5
-1.065	5.397	0.00426	Stip1
-1.389	5.905	0.004275	Slc13a5
0.7341	6.359	0.004275	Nrd1
1.214	6.852	0.0043	Zfp652
-1.54	6.675	0.004318	Acadl
-1.409	5.924	0.004344	Mlf2
-1.183	5.116	0.004356	Scp2
-0.8871	7.544	0.004362	Mras
-1.656	3.856	0.004392	4930430F08Rik
1.044	6.475	0.004409	Enox2
-1.403	4.552	0.004415	Erg28
1.105	7.754	0.004415	Foxp1
-1.421	4.788	0.004424	Ermp1
-1.147	8.87	0.00444	Slc39a12
-1.196	4.524	0.00444	Tmem43
-1.485	3.698	0.00444	H1f2
-1.271	4.413	0.00444	Slc25a44
-1.375	4.426	0.00444	Fbxo21
-1.071	6.918	0.00445	Abcd3
1.525	4.698	0.004453	4833420G17Rik
1.087	6.945	0.004453	Tns1
-1.591	7.137	0.004453	Klf9
0.8115	6.583	0.004454	Hmbox1
1.271	7.699	0.004457	Cmip
-1.395	5.726	0.004458	Pik3ip1
2.354	6.018	0.004464	Tbc1d9
-1.02	6.427	0.004464	Copb1
-1.233	4.441	0.004464	Slc39a1
-1.124	7.058	0.004469	Ppargc1a
-1.083	5.385	0.004477	Apc2
-1.42	4.751	0.004484	Cript
-1.627	4.516	0.004495	Ech1
-1.164	4.789	0.004495	Snap47
-1.501	4.211	0.004558	Ran
-1.636	7.799	0.004558	Itih3
0.7768	6.899	0.004571	Atxn7
-1.117	6.222	0.0046	Lrpap1
-0.8137	6.647	0.0046	Tmem30a
-1.231	5.649	0.004615	Emc1
-1.915	4.097	0.004677	Sult1a1
-1.271	4.778	0.004727	Zfp729a
-1.41	4.617	0.004727	Plpbp
-1.18	4.92	0.004742	Garem2
1.202	6.343	0.004742	Stxbp5
-1.523	4.679	0.004763	Pdp2
1.099	5.269	0.004764	Plpp1
-0.9873	5.955	0.004764	Rab18
-1.31	3.95	0.004764	Mpv17
-1.097	4.985	0.004764	Rer1
-1.947	3.536	0.004764	Arx
0.8496	8.019	0.004799	Rgs7
-1.602	4.952	0.004819	Tmem184c
-1.287	3.872	0.00482	Trappc4
-1.118	4.429	0.004915	Zfp955b
-0.8049	5.515	0.004916	Slc33a1
-0.9767	6.363	0.004959	Nadk2
-1.477	5.534	0.004975	Nr2e1
0.8487	6.527	0.004988	Taf15
-0.9723	4.48	0.005004	Pex19
2.494	9.584	0.00501	Lrmda
1.221	5.343	0.00501	Phka2
-1.136	4.736	0.00501	Puf60
-1.225	7.286	0.005015	Cd63
-1.175	5.037	0.005027	Gstz1
-0.6825	7.583	0.005032	Sorl1
1.403	8.225	0.005032	Smyd3
-1.383	4.106	0.005032	Ckap4
-1.826	4.408	0.005032	Lrrn1
-1.179	6.18	0.005037	Cbs
0.7301	6.522	0.005037	Mapkap1
-1.334	9.515	0.005048	Gpm6a
-1.18	9.695	0.005048	Il31ra
-1.098	4.69	0.005058	Strap
1.122	6.235	0.005058	Rapgef6
-1.095	5.038	0.005162	Tmed4
0.7329	7.276	0.005162	Sfpq
-1.294	5.016	0.005172	Hdgf
-1.135	4.168	0.005172	Col4a1
-0.9493	6.309	0.005191	Atp6v1e1
1.614	6.188	0.005191	Pkig
0.8581	6.387	0.005191	Evi5
-0.8382	5.736	0.005191	Sec61a1
-1.228	5.001	0.005192	Smim10l1
1.776	7.793	0.005211	Entpd1
-1.16	4.861	0.005217	Actr10
1.148	6.182	0.005247	Kif13b
0.8089	7.362	0.00525	Ubn2
-1.417	4.573	0.005258	Fads6
-0.9574	5.071	0.005259	Tmem209
-1.39	4.04	0.005264	Atp6v1f
-1.371	4.707	0.005276	Gpc4
-1.075	7.284	0.005276	Cfl1
1.296	7.084	0.00528	Rab8b
-1.1	5.072	0.00528	Tsn
-1.726	3.488	0.005286	Otx1
-1.008	6.803	0.005301	Dnajc3
0.8543	6.974	0.005301	Smg6
-1.101	7.616	0.005322	Ugp2
0.9259	5.465	0.005322	Hipk3
-1.241	3.801	0.005325	Ormdl3
1.889	6.13	0.005325	Il10ra
-1.799	4.578	0.005351	Rabac1
0.7088	6.753	0.005351	Mib1
-1.11	9.11	0.005351	Filip1l
0.7693	7.98	0.005353	Fto
-1.305	7.13	0.005368	Cyp2j9
1.181	5.601	0.005369	Hltf
1.14	6.684	0.005369	Pwwp2a
-1.035	5.278	0.005379	Nipa1
-1.751	5.137	0.005389	H1f0
1.087	7.482	0.005395	Med13l
-1.3	6.223	0.005414	Clptm1
-0.8962	5.249	0.005414	Smarcb1
-1.323	6.196	0.005416	Insig1
-0.7837	5.822	0.005428	H13
2.12	6.983	0.005428	Cacna1d
-1.087	4.957	0.005473	Rnf139
1.185	6.309	0.005473	Cop1
-0.9855	4.799	0.005473	Med25
1.07	7.365	0.005473	Mvb12b
1.521	7.728	0.005473	Dleu2
-1.418	7.77	0.005507	Fermt2
-1.467	6.367	0.005517	Folh1
-1.397	4.813	0.005517	Hadh
-1.112	4.796	0.005524	Txndc15
-1.109	4.436	0.005527	Timm17a
3.332	3.264	0.005537	Cbfa2t3
-1.265	5.422	0.00556	Psmb1
-1.831	5.27	0.005566	Tob1
-1.46	4.772	0.005568	Dchs1
1.277	7.721	0.005568	Rap1gds1
1.503	4.516	0.005568	Il10rb
-1.294	5.337	0.005575	Zbtb41
-2.057	7.069	0.005588	Id4
-1.635	4.055	0.005592	Fbln1
-0.9709	5.355	0.005592	Rsl1d1
0.687	6.8	0.005592	Tet2
1.106	5.648	0.005598	Xkr6
1.052	7.003	0.005625	Dock11
-1.354	4.007	0.005633	2210016L21Rik
-1.339	4.395	0.005638	Phax
-1.995	4.424	0.005648	Ddit4
0.8817	5.812	0.005648	Cdc42se2
0.9021	6.611	0.005659	Herc4
1.758	8.04	0.005662	Mitf
-0.9892	5.43	0.005662	Cd99l2
-1.394	5.027	0.00567	Selenow
1.685	7.403	0.005706	Lhfpl2
-1.015	8.017	0.005706	Nedd4
-1.32	6.515	0.005706	Chst2
-1.538	3.651	0.005706	Dhrs4
2.042	5.941	0.005706	Tlr7
-1.395	7.078	0.005711	Dkk3
0.9978	8.589	0.005711	Zswim6
2.542	6.157	0.005713	Cd84
-1.412	4.283	0.005713	Acat2
-1.32	3.91	0.00572	Med7
-1.378	4.264	0.00572	Septin5
-1.056	5.794	0.00572	Eif5a
3.237	2.777	0.00572	Spns3
1.453	7.615	0.00572	Agmo
-1.232	4.937	0.005732	Gm10561
1.818	7.134	0.005741	0610040J01Rik
-1.199	4.241	0.005741	Vps28
-1.171	6.45	0.005764	Gaa
1.203	5.433	0.005764	Aagab
1.681	5.312	0.005784	Epb41
-1.11	4.145	0.005838	Dda1
-1.49	8.991	0.005838	Fam107a
1.071	5.313	0.005838	Slc9a7
-1.134	4.421	0.005848	Ndufb5
1.121	4.874	0.005848	Ppp4r2
1.15	5.064	0.005848	Fbxo42
0.9117	6.482	0.005848	Dis3l2
-1.6	7.102	0.005862	Hmgcs1
0.7377	6.963	0.005863	Tnrc18
-1.061	5.187	0.005891	Psmc2
-1.24	13.2	0.005891	Slc1a2
-1.193	4.686	0.005891	Vhl
2.184	4.507	0.005891	Hpcal1
1.382	6.664	0.005903	Git2
0.7737	8.235	0.005957	Luc7l2
-1.276	6.58	0.005957	Lap3
-1.013	4.854	0.005957	Alg10b
0.8751	6.851	0.005957	Dnajc13
1.157	6.953	0.005957	Arhgap17
0.7486	7.685	0.005957	Cdkal1
-1.612	3.973	0.005957	Pcbp4
0.9906	6.222	0.005957	Arap1
-1.187	4.492	0.005963	Cops8
0.7994	6.588	0.005981	Tra2a
0.9474	6.592	0.005981	Map2k5
-1.2	8.736	0.005988	Glud1
2.595	5.056	0.005988	Trim30a
1.201	5.633	0.006015	Mtr
-1.47	5.829	0.006015	Csdc2
2.372	7.257	0.006027	Fyb
-1.168	5.27	0.006035	Aamp
-1.808	4.274	0.006036	Kirrel2
-1.19	4.589	0.006038	Txn2
-1.34	5.372	0.006038	Tmbim1
0.7936	5.887	0.006041	Luzp1
-1.392	3.927	0.006041	Kcnc4
-1.292	4.176	0.006041	Gucy1b1
-1.032	5.157	0.006041	Cd302
1.651	5.748	0.006041	Slc6a6
1.405	5.683	0.006042	Fbxw4
-1.288	4.496	0.006044	Plxna1
-1.13	6.119	0.006044	Nme7
-1.454	4.903	0.006052	Jag1
-0.86	14.67	0.006052	Cmss1
-0.7616	5.895	0.006055	Tmx4
1.064	7.446	0.006056	Pnpla7
-1.1	5.084	0.006067	Fnta
1.384	7.325	0.006067	Apba1
-1.488	4.114	0.006071	Stom
-0.9778	6.444	0.006096	Rab5a
-1.08	5.957	0.006141	Chst10
-1.788	7.499	0.006141	Ezr
-1.393	8.479	0.006146	Ndrg2
0.7536	7.073	0.006146	Gab1
1.1	5.454	0.00618	Nav1
-1.371	4.073	0.00618	Spryd7
-1.085	5.313	0.00622	Plec
1.383	5.681	0.006257	Rab6b
-1.087	4.897	0.006308	Fbxo30
-0.9378	5.704	0.006308	Sec14l2
1.768	5.414	0.006401	Frrs1
1.157	4.829	0.00641	Ilkap
-0.8261	5.913	0.006433	Snrnp200
-1.457	4.413	0.006433	Sbk1
-1.211	3.979	0.006449	Apbb1
1.052	7.78	0.00646	Stag1
-1.041	11.89	0.006495	Gphn
0.8673	6.353	0.006504	Umad1
-1.026	5.353	0.006509	Lrp10
-1.096	5.24	0.006509	Pa2g4
1.073	5.228	0.006509	Samhd1
-0.8253	8.454	0.006512	Hsp90b1
1.017	7.568	0.006518	Gm12239
-1.628	5.546	0.006527	Amer2
-1.14	4.303	0.006541	Ilf2
0.6828	6.535	0.006541	Srek1
0.919	6.343	0.006544	Mbtd1
-0.8734	5.67	0.00655	Ahi1
-1.09	4.158	0.00655	Septin6
-0.9848	4.896	0.006556	Tmbim4
1.366	6.505	0.006575	St3gal3
1.121	6.13	0.006594	Cntrl
1.07	5.022	0.006594	Sumf1
-0.9992	5.334	0.006598	Cldnd1
1.531	5.139	0.006603	Mroh1
2.725	5.604	0.006627	Sdk1
-0.829	7.645	0.006628	Megf10
1.583	4.48	0.006651	Rttn
-0.8267	4.881	0.006651	Cgrrf1
-0.9715	5.502	0.006651	Clcn6
-0.7282	6.382	0.006658	Zfand5
0.8359	6.803	0.006683	Rsrc1
-1.25	5.889	0.00669	Pcbp1
-1.088	5.493	0.006707	Pigs
-1.72	4.115	0.006714	Atp5mpl
-0.874	4.858	0.006714	Eif3m
1.346	7.761	0.006717	Skap2
-0.878	5.381	0.006724	Pls3
-0.8842	7.736	0.00674	Gabbr1
-1.22	6.505	0.006761	Fat1
-1.266	4.709	0.006761	Rab33b
1.866	7.235	0.006761	Lair1
-1.366	5.379	0.006761	Ogdhl
-1.195	5.552	0.006761	Dpy19l3
2.697	6.825	0.006825	P3h2
-0.8072	6.619	0.006825	Zfp36l2
1.649	6.454	0.006825	Vav2
-0.9893	4.81	0.006825	Srek1ip1
-1.213	8.577	0.006832	Slco1c1
-1.052	4.266	0.006842	Creb3
-1.075	4.737	0.006881	Tmem41b
-1.346	3.912	0.006882	Esd
0.6823	7.603	0.006882	Camta1
-1.218	3.719	0.006882	Stx1b
1.219	4.897	0.006915	Vrk1
0.8618	5.798	0.006947	Ubn1
-0.9845	4.966	0.006958	Bzw2
-1.679	5.325	0.006961	Scrg1
-1.155	6.69	0.006961	Dner
-1.167	4.37	0.006961	Tomm20
1.205	5.605	0.006961	Acox3
3.913	2.985	0.006972	Fgr
0.6903	8.105	0.006972	Mbnl2
-0.9921	4.405	0.006981	Trnt1
-1.717	4.143	0.00699	Tmem129
-1.102	4.551	0.007015	Alg11
-1.317	4.175	0.007032	Pnpla2
-1.303	4.639	0.007052	Cops6
-1.389	3.643	0.007053	1700066M21Rik
-1.453	4.15	0.007057	Snx33
0.9177	6.219	0.007057	Creb1
-0.8561	4.962	0.007057	Nudc
-0.9069	7.066	0.007123	Pkm
0.8637	5.961	0.007138	Nsf
1.755	6.631	0.007138	Fnip2
0.9282	5.905	0.007138	Cbfa2t2
0.8124	6.515	0.007177	Btaf1
-1.088	5.608	0.007177	Ndufa10
-1.142	6.159	0.00719	Glrb
-0.9408	6.185	0.007237	Rab6a
-1.088	4.861	0.007237	Pmpcb
-1.097	5.428	0.007256	Klf15
0.6973	6.292	0.007289	Slc10a7
-0.6302	7.352	0.007289	Abcd2
1.578	7.703	0.007321	Ccnd3
-0.8733	5.542	0.007338	Sub1
-0.949	4.65	0.00734	Pigg
-1.143	5.452	0.007356	Aass
-0.7656	6.973	0.007363	Psd2
-0.7469	6.995	0.007385	Lmbrd1
-1.045	9.668	0.007481	Mir6236
-1.33	4.156	0.007488	Rab4a
0.7592	7.452	0.007488	Itsn2
0.6309	9.224	0.007501	Fgfr2
-0.9086	5.504	0.007501	Dstn
0.694	7.001	0.007501	Pias1
-0.9727	7.314	0.007506	Lrig1
0.8224	6.727	0.007506	Stx7
-1.17	4.629	0.007531	Tmem109
0.7306	6.481	0.007598	Pcdhgb2
-0.9802	6.56	0.007619	P4hb
1.317	6.316	0.007633	Arid5b
1.563	5.528	0.007655	Nol4l
-1.115	3.822	0.007655	Psmb3
-1.139	6.046	0.007655	Lrrc8a
-1.114	4.781	0.007668	Rnh1
-1.055	5.586	0.007668	Tle5
0.8668	5.897	0.007736	Pacs2
1.722	4.943	0.007746	Apobec3
-1.268	4.858	0.007746	Eci1
1.194	5.196	0.007765	Pip5k1c
-0.8324	4.548	0.00777	Fbxo10
-0.8635	7.652	0.00777	Wls
3.277	4.484	0.007794	Rnf150
-1.291	3.933	0.007799	Rad23a
-1.173	3.787	0.007828	Bax
-0.8849	4.904	0.007862	Slc13a3
2.065	3.992	0.007862	Mapkapk3
0.6234	7.06	0.007939	Ahcyl2
-1.289	6.047	0.007975	Manea
0.8889	5.739	0.007977	Jak2
-1.035	5.935	0.007986	Sfxn1
1.329	6.449	0.007986	Map3k3
0.8476	6.66	0.00802	Pias2
-1.181	5.035	0.008027	Hsbp1
1.182	9.704	0.008043	Plcl1
-0.6585	8.1	0.008049	Xpr1
-1.291	3.585	0.0081	Tmem237
-1.222	4.265	0.00811	Adgra1
-1.13	4.269	0.008121	Pdk4
-0.8561	6.637	0.008155	Acox1
0.625	6.805	0.008173	Zmym4
-1.03	4.501	0.008173	Gm48747
0.9891	6.834	0.008173	Lyst
-0.8532	5.036	0.008173	Tollip
-1.294	3.658	0.008173	Oxnad1
-0.9367	6.124	0.008173	Gdi1
0.7522	6.391	0.008173	Rnf111
-1.178	5.461	0.008196	Dynlt3
-1.098	4.407	0.008214	Oaz1
1.777	7.529	0.008214	Frmd4b
-1.111	3.901	0.008214	Tor1a
-0.7692	5.023	0.008234	Cggbp1
-1.182	4.189	0.008234	Ndufa7
0.975	6.621	0.008235	Plekhm3
0.722	7.171	0.008238	Aff1
-1.113	4.741	0.008263	Nxt2
-1.031	4.805	0.008274	Rab1b
-1.257	5.254	0.008349	Plekhb1
1.646	7.796	0.008362	Dock10
-1.258	4.197	0.008362	Zfp354c
0.9767	7.065	0.008363	Cnot2
1.419	5.14	0.008363	N4bp2l1
0.8508	6.084	0.008363	Bcor
1.001	7.607	0.008375	Dnmt3a
-0.8486	5.47	0.008392	Anp32e
0.741	6.188	0.008431	Cdyl
-1.121	7.988	0.008431	Asrgl1
-1.108	6.284	0.008449	Cyp4f15
-0.7601	8.425	0.008476	Sema6d
-1.394	4.155	0.008517	Ndp
-1.204	3.953	0.008517	Ucp3
-0.9867	5.559	0.008517	Lrp8
-0.7693	6.23	0.008536	Arcn1
-0.732	7.328	0.008598	Mtss2
-1.069	4.579	0.0086	Jam3
-1.437	3.549	0.008611	Elapor2
1.186	8.01	0.008619	Btbd9
0.8682	6.656	0.008619	Gigyf2
1.157	8.561	0.008619	Cyrib
0.831	5.472	0.008626	Efna5
-1.204	3.732	0.008653	Gm54867
-1.102	5.811	0.008653	Cdc42ep4
1.421	6.059	0.008655	Prkch
-1.078	3.847	0.008689	Kars
1.175	6.315	0.008689	Cpeb2
2.339	6.434	0.008689	Myo1f
-1.772	5.079	0.008689	Hbegf
-1.482	4.757	0.008689	Emx2
-0.7087	6.01	0.008689	Plekho2
0.9465	7.218	0.008689	Fndc3b
0.8454	5.663	0.008689	Foxk2
-1.204	4.401	0.008712	Rbbp9
1.132	7.918	0.008821	Dip2b
-1.123	5.07	0.008821	Heph
-0.887	7.271	0.008857	Kpna1
-1.426	3.653	0.008857	L2hgdh
-1.98	3.519	0.008857	Dusp18
-1.149	4.946	0.008869	Ap2m1
-1.334	4.122	0.008869	Lrch2
0.9565	6.603	0.008869	Rnf169
-1.021	5.309	0.008872	D130009I18Rik
-0.9211	5.194	0.008914	Rnf11
1.013	5.32	0.008933	Nt5dc1
1.692	6.405	0.008969	Stard9
-0.9565	5.379	0.008969	Cyb5a
-1.115	6.583	0.008969	Hmgcr
-1.167	4.041	0.008986	Eid1
-1.048	7.149	0.009032	Gldc
0.9009	6.587	0.00904	Pds5a
-0.8726	5.687	0.009074	Soga3
-1.065	4.939	0.009081	Rxylt1
0.8128	5.817	0.009118	Zfp280d
-0.9738	5.952	0.009143	Idh2
-0.7979	6.364	0.00915	Ssb
0.8475	8.201	0.009159	Mycbp2
1.064	6.668	0.009159	Cerk
-1.571	3.606	0.00916	Ubiad1
0.8409	6.2	0.009163	Snx25
0.8053	6.34	0.009163	Far1
0.7401	6.318	0.00917	Zc3h7a
-1.051	4.76	0.009187	C030037D09Rik
-0.837	5.42	0.009187	Cct4
1.388	4.678	0.009187	Sh3bp1
-0.9574	10.44	0.009237	Cpe
1.063	6.603	0.009246	Abl1
0.6967	6.072	0.009246	Slc30a9
0.8955	5.854	0.009261	Plekhm2
-1.874	5.36	0.009364	Sqle
-1.253	4.407	0.009364	Fkbp2
-0.9849	4.727	0.009364	Eny2
0.7831	7.745	0.009364	Rbm25
0.8842	5.605	0.009385	Xpo6
-0.6529	6.762	0.009395	Tpp1
-1.129	4.059	0.009471	Cnpy2
-1.136	4.648	0.009473	Thap12
0.8758	6.153	0.009473	Rnf38
-1.207	7.353	0.009476	Slc15a2
1.148	5.935	0.009518	Wdr44
-1.229	5.968	0.009542	Dtx1
-0.7558	6.745	0.009553	Ppp1cb
1.711	6.413	0.009553	Lcp2
-0.8343	6.01	0.009598	Tm9sf4
-1.057	4.741	0.009665	Rpl28
-0.8872	4.748	0.009665	Nolc1
0.9726	6.185	0.009668	Cnot6l
-1.192	5.479	0.009668	Shisa4
-1.396	7.541	0.009668	Fam171b
-1.322	4.219	0.009719	Maged2
-0.8383	6.249	0.009722	Calu
-0.9724	5.642	0.009723	Dusp6
0.8796	5.644	0.009766	Tmem87b
-1.226	3.953	0.009772	Pgam1
-1.162	7.317	0.009772	Elovl5
2.074	6.647	0.009772	Fcrls
-0.6204	7.879	0.0098	Nptn
0.8878	6.628	0.009806	Fam91a1
-1.029	4.598	0.009808	Ncoa4
0.8895	5.794	0.009808	Supt20
0.7662	6.903	0.009809	Mdm4
0.6524	8.124	0.009821	Specc1
-0.926	4.412	0.009825	Ndufab1
1.316	9.081	0.009825	Pag1
0.9889	6.857	0.009929	Eri3
0.8317	8.347	0.009936	Atp8a1
-0.7876	5.729	0.009971	Ccnh
-0.9703	5.897	0.01001	Acat1
-1.452	5.04	0.01002	Acadvl
-0.9697	4.651	0.01002	Chic1
-0.748	7.935	0.01002	Ptch1
0.7463	6.857	0.01002	Cep170
0.8128	8.892	0.01012	Chd9
1.229	5.375	0.01013	Banp
0.9776	7.905	0.01016	Chd7
-1.18	6.561	0.01017	Pantr1
-0.745	5.1	0.01018	Ythdf1
-1.435	3.384	0.01019	Scg5
-1.077	4.613	0.0102	Cltb
0.7855	6.329	0.01023	Gpcpd1
-1.639	9.634	0.01025	Ptn
0.6512	6.195	0.01025	Ythdc1
-1.671	3.575	0.01025	Cby1
-1.05	5.809	0.01025	Rbbp7
-0.8919	6.351	0.01027	Tiparp
1.758	5.218	0.01031	Apobec1
0.8017	6.619	0.01032	Tasor
-1.051	5.912	0.01032	Hspa4l
-0.917	5.61	0.01034	Arhgef19
-0.878	6.758	0.01035	Hadha
-1.258	5.39	0.01043	Ddost
-1.054	5.091	0.01043	Dbt
-0.9905	10.01	0.01044	Ntrk2
0.7223	5.956	0.01051	Parg
-1.359	5.196	0.01057	Polr3h
-0.8649	7.958	0.01057	Ywhae
-1.18	4.032	0.01057	B230354K17Rik
-0.9097	5.343	0.01057	Maged1
1.112	7.689	0.01058	Immp2l
-1.057	3.795	0.0106	Drg2
1.503	5.548	0.0106	Hps4
0.8783	6.146	0.0106	Rbpj
-1.286	4.709	0.0106	Chmp2a
-1.353	3.789	0.01061	Rhpn2
1.525	6.961	0.01062	Zdhhc14
2.046	5.858	0.01062	Marchf3
0.5943	7.083	0.01068	Rbm26
0.6187	7.012	0.01068	Lrch3
-0.8568	7.991	0.01068	Astn1
1.545	6.014	0.01069	Mlxip
-0.9191	4.861	0.01069	Oplah
-0.9872	5.542	0.01069	Ddx1
2.14	8.483	0.01071	Dock2
1.38	7.377	0.01076	Apbb2
-0.9174	4.865	0.01076	Idh3g
-1.223	4.181	0.01076	Srp19
-1.008	4.853	0.01079	Vbp1
-1.103	4.561	0.01079	Chmp1b
-0.8897	7.693	0.01079	Hacd2
0.9152	7.799	0.01079	Vti1a
-0.7309	5.769	0.01083	Dctn2
1.319	8.871	0.01097	Prkn
-0.8933	6.576	0.01097	Prodh
-1.305	5.098	0.01097	Cox7c
-0.819	8.779	0.01097	Cd81
-1.26	4.356	0.01098	Cfl2
0.9523	6.826	0.01098	Crlf3
-0.7092	6.449	0.01101	Dhx36
-1.206	5.102	0.01101	Ccdc127
2.328	5.783	0.01105	ENSMUSG00000120385
-0.6912	7.03	0.01108	Rab1a
-0.6685	5.642	0.0111	Dnajb4
-0.7982	6.596	0.0111	Ociad1
0.6273	7.875	0.0111	Tmem135
1.52	5.437	0.01115	Pik3cb
-1.104	5.204	0.01115	Twf1
0.6594	6.793	0.01115	Stk3
-1.23	3.575	0.01115	Sap30l
0.659	9.076	0.01115	Hivep3
1.093	5.836	0.01117	Prpf39
1.575	6.93	0.01117	Arhgap39
1.37	4.582	0.01117	Nmnat3
-1.221	3.92	0.01117	Rnf181
1.269	8.935	0.01117	Slc9a9
-1.064	4.261	0.01117	Rpl18
1.447	7	0.01118	Msn
1.154	6.055	0.01119	Nek6
-1.076	4.152	0.0112	Slc35a2
-0.801	9.336	0.0112	Nrcam
-0.8353	5.686	0.0112	Echdc1
2.335	6.928	0.0112	AU020206
0.6743	7.167	0.01125	Ppp6r3
-0.759	8.658	0.01131	Fut9
-0.6772	6.306	0.01133	Amfr
0.8716	7.093	0.01133	Mtmr3
-1.036	6.27	0.01137	Ranbp3l
-2.06	5.391	0.01139	Fabp7
2.089	7.317	0.01139	Lpcat2
-0.7972	6.604	0.01141	Map7d1
0.9462	4.987	0.01141	Rnf157
0.7142	6.674	0.01149	Rps6ka5
0.8768	6.839	0.01151	Lcor
0.8819	7.211	0.01151	Capzb
-0.969	7.007	0.01151	Sdc2
-1	3.925	0.01153	Rfng
-0.7617	5.929	0.01153	Erlec1
1.908	6.028	0.01154	Itga9
-1.092	6.02	0.01154	Jun
-1.116	4.606	0.01157	Mmgt2
1.974	5.61	0.01159	Pald1
1.834	6.352	0.0116	Slc7a8
1.823	5.162	0.01161	Gmip
-0.7141	5.655	0.01166	Rps8
1.826	4.541	0.01172	Camkk2
-0.7562	5.535	0.01172	Pank3
1.383	5.26	0.01183	Ggta1
0.6946	6.485	0.01184	Agap1
1.254	6.191	0.01184	Gtf2h2
1.855	7.318	0.01189	Cfh
1.307	4.803	0.0119	Gm37472
0.814	5.972	0.01193	Snx10
1.065	5.676	0.01199	Pot1b
1.612	7.655	0.01202	Zfp710
1.42	6.236	0.01202	Sipa1l1
-0.8624	4.749	0.0121	Calcoco1
1.158	5.121	0.0121	Tbcd
1.047	5.056	0.01212	Iffo1
-1.016	5.17	0.01218	Fbxo44
-0.9214	4.179	0.01218	Kctd6
-1.247	4.336	0.01219	Gnptg
-0.7769	5.664	0.01221	Ddx24
1.3	8.264	0.01223	Etv6
0.6204	8.119	0.01223	Igf1r
0.6289	7.264	0.01224	Myo9a
-1.083	4.995	0.01224	Cfap36
2.411	3.537	0.01225	Itgb3
-1.037	5.8	0.01225	Mtarc2
-1.043	10.04	0.01228	Acsl3
-0.8614	4.573	0.01229	Tmem201
1.918	6.232	0.0123	Lrrk1
0.9943	5.947	0.01232	Fam117b
1.087	5.361	0.01232	Ankrd10
-0.9769	4.715	0.01232	Srprb
1.72	5.809	0.01234	Aim2
-1.192	3.632	0.01234	Cuta
1.137	6.038	0.01234	Ttc7
1.267	5.239	0.01236	Vac14
-0.7314	7.327	0.0124	Agpat3
1.145	6.828	0.0124	Rapgef1
0.572	8.371	0.01241	Tmem164
-0.9875	5.014	0.01241	Hmgn1
-0.8198	5.781	0.01241	Btg1
-0.7305	8.067	0.01241	Ttyh3
0.6822	6.693	0.01241	Gm21992
1.304	6.486	0.01244	Bcl2l1
4.022	3.63	0.01244	Mrc2
1.247	7.639	0.01247	Ivns1abp
1.133	6.236	0.0125	Gls
-1.325	3.828	0.01256	Akt1s1
-1.148	4.258	0.01257	Btf3
-0.9616	5.827	0.01257	Mthfd1
0.638	6.219	0.01257	Psen1
1.085	8.226	0.01258	Abhd12
-0.8693	4.976	0.01258	Eef1d
-1.311	4.466	0.0126	Tprgl
-1.2	5.055	0.01262	Pax6
0.9012	7.235	0.01262	Smg1
1.27	8.246	0.01262	Ttc28
-0.8199	5.508	0.01265	Tob2
-1.053	8.007	0.01265	Septin7
2.332	6.208	0.01266	Il6ra
-0.7553	7.623	0.01268	Ktn1
-1.026	4.184	0.0127	Rbm8a
-1.195	3.835	0.01271	Ubxn8
-0.6258	6.104	0.01272	Smc1a
0.6575	6.959	0.01272	Papola
0.6491	6.891	0.01273	Fndc3a
-0.917	5.055	0.01273	Pdap1
1.115	5.29	0.01273	Slc38a1
-0.8536	6.008	0.01273	Adhfe1
-0.5828	8.34	0.01273	Bmpr1b
1.027	6.782	0.01273	2610035D17Rik
-1.385	3.833	0.01275	Grpel1
-0.8651	6.342	0.01276	Nucks1
1.019	5.025	0.01281	Vkorc1l1
3.184	2.462	0.0129	Tlr9
-1.113	3.939	0.01299	Hccs
-0.7539	5.276	0.01299	Cct2
-0.8112	5.578	0.01299	Copb2
-1.184	4.298	0.013	Nabp2
-0.6598	6.879	0.01301	Srebf2
0.7902	7.059	0.01301	Slmap
-0.8486	5.209	0.01301	Rpl37
-0.9196	5.438	0.01301	Txnl1
0.8982	6.219	0.01302	Ano6
-1.154	4.068	0.01305	Ass1
0.8702	5.541	0.01305	Gm20732
-0.7843	5.195	0.01306	Sdhc
-0.9074	4.698	0.01306	Thoc7
0.7916	6.258	0.01307	Nudcd3
-1.269	5.329	0.01309	Plaat3
-0.723	9.229	0.0131	Lrp1b
0.6068	6.924	0.01314	Arid2
-1.322	3.662	0.01317	Fdx1
-0.8297	7.333	0.01318	Eva1a
-1.23	4.216	0.01318	Amotl2
-0.8902	7.309	0.01324	Gpd2
2.076	10.14	0.0133	Plxdc2
1.155	5.163	0.01332	Foxk1
-0.8899	5.305	0.01332	Gcnt4
0.7263	7.186	0.01334	Rnf216
0.7632	7.829	0.01334	Ddx17
0.9348	5.503	0.01335	N4bp1
1.206	6.867	0.01336	Uvrag
1.388	7.772	0.01336	Dennd4a
-1.137	4.512	0.01336	Pak1ip1
0.8472	8.479	0.01337	Fbxl17
1.092	6.657	0.01337	Rnf213
0.8394	6.148	0.01338	Prr14l
-0.9086	5.033	0.01339	Psma1
0.6921	9.648	0.01341	Pitpnc1
-0.7246	6.231	0.01345	Kifap3
0.9805	6.02	0.01345	Sgk3
-1.084	4.628	0.01345	Zfp267
-0.8378	6.618	0.01352	Rbms3
1.491	5.864	0.01352	Prkcd
-0.7084	8.024	0.01354	Egfr
0.8568	5.622	0.01357	Ikbkb
-1.077	4.059	0.01357	Prr13
1.429	6.376	0.01357	Evl
-0.9536	5.849	0.01357	Tmem63b
-1.079	4.629	0.01357	Atg9a
1.825	6.325	0.01366	Tbc1d16
-1.108	3.947	0.01366	Yae1d1
-0.6544	6.185	0.01366	Efcab14
0.7866	8.595	0.01368	Lncpint
0.8741	10.13	0.01368	Dock4
-1.253	4.909	0.01369	Ranbp1
2.057	6.569	0.01369	Plcg2
1.052	7.175	0.01374	Nfkb1
1.17	6.432	0.01374	Vps54
0.6594	8.187	0.01375	Fam172a
0.5532	7.325	0.01378	Nbea
0.8193	5.388	0.0138	Ttc13
0.677	6.774	0.01383	Eml6
1.908	7.077	0.01383	Sipa1l2
1.196	8.707	0.01389	Wwox
0.6958	7.232	0.01398	Celf1
-0.9433	5.088	0.01399	Eif3b
0.9092	6.025	0.01399	Akap8l
0.6233	7.012	0.014	Lcorl
1.452	7.408	0.014	Rptor
-1.151	4.205	0.01403	Tmem18
-1.293	4.04	0.01407	Lmf2
0.9422	5.456	0.01409	Aatf
-0.7612	7.186	0.01409	Tax1bp1
-1.355	3.588	0.01409	Hypk
-1.215	3.94	0.0141	Ilvbl
0.5723	7.251	0.0141	Foxo3
-1.115	4.196	0.0141	Ndc1
-1.144	5.963	0.01413	Il33
-0.843	6.674	0.01413	Tmx3
2.17	7.739	0.01413	Ikzf1
3.023	3.038	0.01416	Trim36
0.7848	5.597	0.01417	Tsga10
1.877	6.417	0.01422	Kcnk13
-1.484	5.96	0.01423	Nnat
-0.9183	4.15	0.01424	Usp1
1.929	5.69	0.01424	Ctsh
-0.9497	4.183	0.01426	Slc25a20
0.6313	7.144	0.01426	Gpatch8
0.5749	8.385	0.01426	Phf21a
2.254	7.63	0.01435	Ly86
-0.8557	4.437	0.01435	Spock2
1.07	5.011	0.0144	R3hcc1l
-1.066	5.763	0.01441	Psip1
0.7	8.31	0.01441	Arid1b
0.9887	7.817	0.01442	Akt3
-0.7088	6.288	0.01442	Erp44
-0.8225	5.041	0.01442	Pomt2
0.8121	5.745	0.01448	Gfm2
1.137	7.519	0.01452	Sh3kbp1
-1.045	4.409	0.01456	Fhl1
-1.234	3.568	0.01456	Slc35a4
-1.217	3.714	0.01456	Eif2b2
1.393	4.711	0.01456	Tep1
-0.7722	6.578	0.01459	Plcd4
-1.074	4.766	0.01461	Cystm1
-1.043	4.04	0.01465	B3gat3
0.5807	7.285	0.01465	Atp2c1
2.256	3.379	0.01466	Cep85
0.8	7.248	0.01468	Ap3b1
0.6882	6.202	0.01469	Relch
0.5532	7.228	0.0147	Mark3
0.9595	6.614	0.01474	Elf2
1.873	7.405	0.01475	Lrch1
2.153	5.156	0.01478	Epsti1
-0.9042	4.348	0.01483	Kyat3
1.971	7.842	0.01487	Dock8
-1.084	4.079	0.01489	Fam8a1
-1.004	4.612	0.01493	Cbx6
-1.012	4.992	0.01498	Asb8
-0.9546	4.277	0.01498	Psmd5
1.256	8.309	0.01498	Asap1
-0.8005	8.409	0.01501	Ahcyl1
-1.286	3.845	0.01502	Tbl2
-0.7621	6.344	0.01504	Dctn4
1.02	8.103	0.01504	Fchsd2
1.065	4.948	0.01504	Gatb
0.9699	5.899	0.01505	Usp48
2.806	3.694	0.01505	Col15a1
1.132	6.709	0.01505	Taok3
-0.9943	4.807	0.01505	Ssrp1
0.8189	6.76	0.01505	Tpm3
-1.215	4.101	0.01505	Tmem185a
0.8339	5.123	0.01505	Cdyl2
0.7672	7.516	0.01507	Tbl1xr1
-1.022	4.967	0.01512	Glmp
1.197	6.106	0.01512	Ccdc93
-1.065	4.562	0.01513	Tsen34
1.01	6.206	0.01514	Dym
1.978	5.716	0.01514	A630001G21Rik
1.378	5.467	0.01523	Scoc
-0.6291	6.425	0.01524	Morf4l1
1.907	4.874	0.01526	Elf4
-0.8342	4.837	0.01527	Ppa2
-0.6573	6.147	0.01527	Bicd2
0.8876	6.761	0.01532	Cd2ap
0.9533	6.131	0.01536	Tmem104
-0.895	5.619	0.01536	Clic4
0.8535	5.235	0.01536	Tex2
0.6659	7.225	0.01538	Snrnp70
-0.942	4.772	0.01541	Jund
-1.215	4.268	0.01541	Qdpr
0.7715	5.927	0.01541	Armh3
-1.286	3.529	0.01544	Slc25a39
0.8254	6.349	0.01547	Acsl4
1.005	5.076	0.01548	Rnpep
-0.7808	6.3	0.0155	Rad21
-1.055	5.968	0.0155	Ndufv2
-0.8326	4.819	0.01553	Arl1
-0.9801	4.902	0.01554	Ubr7
2.097	5.2	0.01554	Mlph
2.023	5.565	0.01554	Fgd2
-1.009	4.479	0.01554	Tspyl1
1.735	6.814	0.01555	Pmepa1
0.796	7.376	0.01557	Irf2
1.675	6.332	0.01557	Znrf2
0.6838	6.48	0.01563	Sbno1
2.27	4.279	0.01563	Rpph1
-0.8322	5.21	0.01563	Aifm1
-0.849	13.01	0.01563	mt-Rnr2
2.203	7.707	0.01573	Chn2
1.506	8.14	0.01573	Ophn1
1.184	5.473	0.01577	Litaf
-1.093	4.426	0.01577	Abhd13
-0.8012	4.791	0.01577	Yipf6
-0.7075	5.386	0.01578	Ppp6c
0.78	5.796	0.01578	Rp2
1.929	5.282	0.01578	Pbx3
1.698	4.824	0.01583	Trim30d
-0.8924	6.575	0.01584	Eif3c
-0.7868	6.139	0.01589	Bzw1
0.8976	6.456	0.01593	Nxn
0.7349	6.043	0.01598	Vps13a
-0.8398	4.527	0.01598	Ncbp2
0.8458	7.029	0.01598	Phactr2
0.9444	6.685	0.01598	Sppl3
0.5759	7.01	0.01602	Scaf8
-1.093	3.539	0.01602	Zfp229
-0.6321	5.074	0.01607	Jup
0.645	6.692	0.01622	Scmh1
-1.107	4.111	0.01622	Mrpl18
0.6411	6.024	0.01622	Dram2
0.906	5.593	0.01622	Clip2
-0.7769	5.318	0.01622	Ppp1r15b
2.165	5.27	0.01624	F11r
-1.269	4.349	0.01625	Poldip2
1.111	7.383	0.01625	Wasf2
2.033	7.12	0.01629	E230029C05Rik
0.7318	8.402	0.01629	Bach2
2.128	7.156	0.01634	Arhgap22
1.957	8.274	0.01635	Lyn
0.5909	6.991	0.01636	Nsd3
-0.8083	6.917	0.01639	Tnfrsf19
-0.9401	4.363	0.01639	Retreg2
-0.9193	4.971	0.01647	Rpl31
0.8272	4.993	0.01647	Cnot10
1.04	4.495	0.0165	1110059E24Rik
-0.9261	4.219	0.01651	Bbof1
1.066	8.19	0.01653	Tbc1d5
-0.8126	8.246	0.01657	Pdia3
-0.9354	4.443	0.01659	Sgta
1.28	5.076	0.0166	Slx4ip
1.223	9.437	0.01666	Epb41l2
-0.6372	6.631	0.01672	Chmp4b
1.839	5.311	0.01672	Arhgap30
0.663	6.746	0.01673	Ehmt1
0.7179	5.295	0.01674	Mob2
0.8106	6.174	0.01676	Stk4
-0.8229	7.471	0.01678	Vegfa
-0.663	9.037	0.01679	Trim9
0.7035	6.383	0.01681	Bicra
-0.7068	7.118	0.01682	Tprkb
-0.8029	5.265	0.01683	Hyou1
0.7266	5.9	0.01687	Naa35
1.773	7.841	0.0169	Ppm1h
-1.163	3.867	0.0169	Mrps31
-0.9625	4.847	0.0169	Myl6
2.35	6.368	0.0169	Adap2
-0.9592	6.03	0.0169	Dars
-0.7884	4.878	0.0169	Rnf6
-1.113	3.8	0.0169	Fbxw5
0.9628	5.001	0.0169	Mta3
-1.45	3.448	0.01691	Slirp
1.581	9.385	0.01692	Srgap2
-0.8067	5.09	0.01692	Rpl23a
2.122	5.019	0.01692	Tbc1d8
-0.7302	5.176	0.01693	Tm2d1
0.5144	7.114	0.01693	Rsrp1
-0.8559	4.774	0.01695	Tmub2
-0.6609	6.742	0.01697	Hp1bp3
-0.6079	6.192	0.01703	Wdr1
-1.089	3.848	0.01705	Rfk
-0.9025	4.234	0.01705	Nol6
0.9192	5.88	0.01712	Nr6a1
1.569	8.473	0.01714	Inpp4b
-0.7836	5.297	0.01714	Tmem51
0.6775	6.785	0.01715	Spop
-1.304	3.459	0.01715	Sgtb
-0.643	6.212	0.01716	Atp6ap2
-1.305	4.01	0.01716	Mapk8ip1
0.6403	6.556	0.01727	Cpsf6
-0.9416	5.809	0.01731	Tmx1
-1.173	4.35	0.01732	Pir
-0.808	6.287	0.01738	Vcp
1.683	7.537	0.01741	Ptprc
1.739	6.426	0.01744	Ptk2b
-1.183	4.179	0.01745	Ndufaf4
-0.8644	5.034	0.01747	Yipf5
-0.7534	4.632	0.01748	Mars1
0.9238	6.41	0.01748	Camkmt
1.261	6.096	0.01748	Mknk1
0.6529	5.636	0.01751	Fam193b
-0.6427	6.27	0.01754	Acadsb
0.5477	6.411	0.01758	Bbx
0.6258	6.936	0.01758	Kansl1l
-0.7193	6.297	0.01758	Rpn2
-0.6674	6.706	0.01759	Akt2
-0.9436	4.274	0.01759	Bet1
0.8668	8.375	0.01759	Wnk1
-1.09	4.49	0.01759	9330188P03Rik
0.7601	5.339	0.01759	Rimklb
2.713	3.712	0.01759	Ccdc88b
-0.784	5.978	0.0176	Pdgfrb
1.648	6.632	0.01767	St3gal6
1.895	4.131	0.01774	Tyk2
0.5538	7.639	0.01777	Mllt10
-0.8961	4.389	0.01777	Smim4
-0.7956	5.241	0.01779	Aars
0.8612	5.268	0.01783	Pfkfb4
4.341	3.187	0.01783	H2-Ab1
0.6511	8.185	0.01783	Tcf7l2
-0.6318	7.035	0.01783	Ywhaz
0.6896	7.329	0.01783	Trak1
-0.9823	4.048	0.01784	Eif2b4
0.798	5.403	0.01789	Ubp1
2.418	7.104	0.01789	Tbxas1
2.983	4.343	0.01789	Niban1
1.351	6.526	0.01789	Cradd
-0.954	7.142	0.01789	2310022B05Rik
-0.6231	6.429	0.01789	Fgf1
0.9592	6.527	0.01789	Stx8
-0.834	4.408	0.01791	Mr1
0.939	8.149	0.01798	Zfand3
1.195	6.117	0.01798	Nfatc1
1.18	8.45	0.01801	Itgb5
0.6229	7.148	0.01801	Dnm2
-0.9598	4.403	0.01801	Snrnp27
1.001	8.215	0.01802	Kcnma1
-1.269	5.042	0.01806	Pgk1
0.8215	5.337	0.01807	Camta2
1.771	6.505	0.01811	Cd86
2.077	7.273	0.01811	Hpgds
0.882	5.58	0.01812	Hycc1
0.6846	5.644	0.01818	Zfp451
-0.8327	4.346	0.01818	Ubxn2b
2.26	8.247	0.01818	Runx1
-0.7511	5.573	0.01819	Zfp706
-0.6603	5.144	0.01826	Uba2
-0.5973	6.582	0.01826	Ywhab
0.8446	6.423	0.01829	Thada
0.8835	6.025	0.01832	Pepd
0.7194	5.799	0.01832	Wdr37
1.574	7.51	0.01832	Bin1
-0.8481	4.841	0.01832	Klhl13
2.586	2.989	0.01836	Itpripl1
1.238	4.57	0.01836	Ppip5k1
1.482	8.548	0.01837	Gab2
1.458	5.511	0.01837	Dtnbp1
1.843	6.248	0.01837	Arhgap25
-0.9927	4.944	0.01848	Arpp19
-0.7068	5.126	0.01848	Ppm1k
1.484	7.418	0.01849	Smap2
-1.57	3.656	0.01851	Svip
1.006	8.998	0.01852	Foxn3
-0.9543	4.177	0.01853	Oscp1
0.6479	6.934	0.01854	Hdac4
-1.103	3.805	0.01858	Pcdhga6
0.6065	6.722	0.01858	Asxl2
-0.7208	5.387	0.01858	Lman2
-0.9178	5.909	0.01858	Tusc3
1.158	7.304	0.01865	Bbs9
1.049	6.303	0.01865	Rbfox1
0.6888	8.636	0.01865	Exoc4
-0.774	9.162	0.01869	Kif1b
-0.714	11.73	0.01869	Camk1d
1.54	8.403	0.01869	Ptprj
-1.028	4.895	0.01869	Psmd8
1.597	6.25	0.01869	Abi3
2.103	7.556	0.01875	Gm2629
-0.8645	6.022	0.01877	1110004F10Rik
1.485	6.117	0.01878	Cd53
-0.65	5.404	0.01878	Hibch
0.9054	5.619	0.01883	Spopl
-0.9083	5.229	0.01889	Rpl8
0.972	6.581	0.0189	ENSMUSG00000095041
0.6637	6.54	0.0189	Fbxl20
0.7464	5.896	0.01891	Vps50
-1.022	7.61	0.01901	Cd47
0.7806	7.388	0.01901	Ank
2.205	7.406	0.01901	C1qb
0.8697	6.515	0.01909	Pign
1.513	7.113	0.01914	Tbc1d22a
-0.5745	5.961	0.0192	Ltn1
-1.098	3.973	0.01932	Dctn3
0.5757	6.305	0.01934	Fubp1
-0.627	6.237	0.01935	Selenot
0.7353	6.329	0.01935	Synj1
1.716	4.401	0.01935	Stat6
1.53	5.031	0.01937	Ntpcr
-0.7362	5.4	0.01937	Copg1
0.6936	6.626	0.01943	Adam23
2.331	6.225	0.01946	Blnk
1.437	6.367	0.01948	Phyhd1
1.293	4.975	0.01949	Galk2
0.9047	6.093	0.01951	Ppm1l
1.888	8.056	0.01953	Prkcb
-0.6893	5.96	0.01953	Ganab
0.5574	6.603	0.01953	Ylpm1
1.426	5.5	0.01953	Rffl
1.924	6.714	0.01956	Rasgrp3
-1.462	4.508	0.01962	Extl2
0.6631	5.365	0.01963	Naa16
-0.6774	5.244	0.01964	Crat
0.6974	5.979	0.01964	Pspc1
1.096	5.602	0.01973	Mical3
0.6981	5.308	0.01973	Cramp1
1.028	4.954	0.01973	Atg4c
0.87	5.832	0.01973	Dapk1
0.8813	4.933	0.01973	Tbc1d2b
-0.782	5.516	0.01973	Clcc1
1.601	6.547	0.01973	Eml4
-0.9808	4.357	0.01974	Tmem242
0.772	7.684	0.01974	Herc2
-1.118	4.314	0.01974	Emp2
0.684	8.913	0.01974	Gnaq
-1.588	3.913	0.01992	Fdps
-0.8061	6.75	0.01994	Ppp2ca
-0.9856	4.45	0.01997	Ccdc18
0.6442	5.785	0.02005	Suz12
0.7578	7.51	0.02006	Atxn7l1
1.462	7.179	0.02007	Kctd12
0.7104	5.346	0.02008	Med14
1.511	6.096	0.0201	Whrn
-0.8706	4.21	0.0201	Vangl1
0.9464	7.634	0.02014	Arl15
-0.5951	6.013	0.02014	Tulp3
2.271	6.81	0.02015	C1qc
1.845	8.235	0.02017	Ssh2
1.112	6.293	0.02017	Rps6kc1
-0.8481	8.338	0.02017	Lamp1
1.273	6.397	0.02017	Pacsin2
-0.7814	5.504	0.02017	Cct8
-1.483	3.323	0.02017	Ost4
0.5782	6.249	0.02018	Atosa
-1.264	4.8	0.02021	Gpr162
-0.7622	6.14	0.02021	Arhgef9
-0.6227	9.645	0.02021	Ncam1
1.144	5.136	0.02021	Gxylt1
-0.695	7.933	0.02021	Ncam2
0.6588	6.746	0.02023	Denn2b
-1.087	3.998	0.02023	C1galt1c1
0.757	7.136	0.02023	St6gal1
0.607	6.693	0.02035	Phf20l1
-0.9872	4.214	0.0204	Atic
0.5853	6.861	0.02042	Nrf1
-0.7256	6.313	0.02042	Snx14
1.668	4.607	0.02048	Fgd3
-0.9998	5.982	0.0205	Ephx2
1.617	5.85	0.0205	Pik3cd
1.057	4.779	0.0205	Ccdc191
1.926	5.153	0.0205	Slc7a7
-0.8183	5.131	0.02051	Tmem144
1.118	4.545	0.02052	Gga3
-0.874	4.545	0.02055	Itga7
1.762	8.423	0.02055	Snx29
0.5359	7.621	0.02055	Dip2c
1.798	4.249	0.02055	BC035044
1.872	4.476	0.02055	Mlxipl
-0.7097	5.477	0.02056	Rnf14
1.122	5.328	0.02059	Atrnl1
1.894	9.197	0.02065	Ldlrad4
0.8227	6.488	0.02069	Abcc5
-0.7176	4.756	0.02072	Ttc39c
0.8602	6.62	0.02072	Ulk2
0.7512	5.302	0.02078	Brf1
-0.9516	4.113	0.0208	E2f5
-0.7247	9.189	0.02085	Jarid2
2.372	2.625	0.02085	Lyl1
-1.296	3.499	0.02087	Mrpl49
1.822	5.752	0.02089	Elk3
0.5408	7.141	0.02089	Zfp292
1.294	5.121	0.02091	Traf5
0.806	6.669	0.02092	Osbpl8
1.047	9.149	0.02092	Mbnl1
-0.6155	6.593	0.02092	Slc22a23
1.988	4.73	0.02095	Rasal3
1.958	4.115	0.021	Naip6
-1.117	6.866	0.021	Dcc
-0.7205	8.534	0.021	Cdh2
-0.9345	4.219	0.021	H2az2
-0.8331	4.97	0.021	Pdhb
-0.9445	3.817	0.02102	Pcdh19
0.8386	5.762	0.02102	Ino80
0.6039	8.082	0.02102	Glis3
1.973	9.386	0.02103	Tgfbr1
0.7	6.201	0.02111	Cxxc5
[truncated: 55,011 more rows]

## Sheet: DE-3_Ex_Neuron
logFC	AveExpr	p_val_adj	gene_names
-1.523	6.035	0.05908	Nme7
0.8608	6.108	0.05908	Ide
-1.146	6.145	0.05908	Nrsn1
-1.245	4.57	0.05908	Ubc
1.041	5.823	0.05908	Usp54
-0.7938	4.304	0.05908	Atp5d
2.285	7.92	0.05908	Lrmda
-1.14	4.057	0.05908	Elob
-0.9551	4.331	0.05908	Atp5j2
4.129	0.7643	0.05908	Cldn34c1
-0.8494	7.915	0.05908	Tenm1
-4.01	4.117	0.05908	Gm47283
-0.9312	5.04	0.05908	Bex3
1.027	4.685	0.05908	Stk10
-1.038	3.984	0.05908	Tceal6
2.574	4.492	0.05908	D7Ertd443e
-0.83	5.032	0.05908	Prdx2
-0.8318	5.273	0.05908	Dynlrb1
-0.8743	5.487	0.05908	Ldha
-0.7466	7.064	0.05908	Ncdn
-0.8916	6.249	0.05908	Tro
-0.7522	6.884	0.05908	Slc25a4
-0.7374	4.516	0.05908	Msantd4
-1.486	2.716	0.05908	Rwdd3
-0.884	4.905	0.05908	Atp5md
-1.278	5.38	0.05908	Cacna2d2
0.789	6.346	0.05908	Cd2ap
-0.7999	9.353	0.05908	Il31ra
-0.9426	4.348	0.05908	Cox5b
-0.7371	5.79	0.05908	Scn3b
-0.7626	6.14	0.05908	Tpi1
-1.04	4.008	0.05908	Gm5124
-0.9221	3.981	0.05908	Abhd8
-0.837	5.753	0.05908	Selenow
0.7813	7.587	0.05908	Tbc1d5
-0.7193	4.806	0.05908	Ran
-0.6741	7.371	0.05908	Atp5b
0.592	7.786	0.05908	Zfand3
-0.7309	7.664	0.05908	Aldoa - ENSMUSG00000030695
-0.9135	4.191	0.05908	Eef1b2
2.019	4.346	0.05908	Tec
-1.475	3.459	0.05908	Gm31333
-0.7141	4.228	0.05908	Eif1b
-1.131	3.821	0.05908	Uqcr11
1.358	5.619	0.05908	St6gal1
-0.8565	4.724	0.05908	Ppp1r1a
-0.7933	4.69	0.05908	Map1lc3a
-0.5346	6.374	0.05908	Mtch1
-0.8101	4.98	0.05908	Slitrk4
0.8364	5.781	0.05908	Tspan14
0.6462	6.525	0.05908	Btaf1
-0.9636	6.004	0.05908	Ubb
-0.6719	5.623	0.05908	Pja1
-0.7855	4.976	0.05908	Ndufa4
-1.82	4.705	0.05908	Slc17a6
-3.75	1.639	0.05908	Cfap77
-1.245	3.217	0.05908	Tmem91
-0.9103	8.431	0.05908	Cntnap5a
-0.8262	6.202	0.05908	Trak2
-0.7968	5.883	0.05908	Ap2m1
-0.7428	6.022	0.05908	Mapk8ip2
-1.476	4.13	0.05908	Gm20642
-0.6415	6.645	0.05908	Vdac1
-1.56	1.779	0.05908	Rtl8a
-0.8472	5.462	0.05908	Ctxn1
1.307	4.532	0.05908	Abtb2
-0.852	4.877	0.05908	Magee1
2.325	1.644	0.05908	Pcdhb22
-0.5861	7.265	0.05908	Atp6v1b2
1.489	4.618	0.05908	Fgd6
-0.8324	5.137	0.05908	Cacybp
-0.5448	6.311	0.05908	Sub1
2.625	2.067	0.05908	5033421B08Rik
0.6077	5.51	0.05908	Ppp4r1
-0.6441	5.941	0.05908	Hspd1
-0.9642	4.057	0.05908	Uqcrq
1.161	4.555	0.05908	4833420G17Rik
-0.9056	5.654	0.05908	Ddn
-1.407	3.283	0.05908	Gm47469
0.8019	4.997	0.05908	Invs
0.6483	7.437	0.05908	Picalm
-0.7213	3.803	0.05908	Dact3
0.7629	7.771	0.05908	Sox5
-0.8563	6.366	0.05908	St8sia3
-0.7064	5.164	0.05908	Otub1
-0.5975	7.746	0.05908	Calm3
-1.133	2.998	0.05908	Fsd1
-0.6101	5.261	0.05908	Hsbp1
-0.5538	7.679	0.05908	Xpr1
-0.7551	5.085	0.05908	Tpgs2
1.131	4.411	0.05908	Tmc7
-1.328	2.321	0.05908	4930547E14Rik
-0.7427	6.375	0.05908	Camkv
-0.5587	6.844	0.05908	Gabarapl1
0.9441	7.412	0.05908	Snx29
0.6145	4.808	0.05908	Elk4
-0.9199	2.942	0.05908	Kbtbd4
1.176	4.899	0.05908	Sytl2
-0.6578	4.464	0.05908	Stub1
-0.62	5.18	0.05908	Podxl2
-0.8231	4.303	0.05943	Dctn3
-0.5368	5.17	0.05966	Mrfap1
-0.5753	5.794	0.05988	Smarca1
1.945	4.843	0.05988	Arhgap25
-0.6419	5.812	0.05988	Cox4i1
-0.7293	4.534	0.05988	Atp5g3
-0.7497	5.28	0.05988	Bex2
-1.104	3.154	0.05988	Ndufa1
1.538	5.797	0.05988	Itga6
1.186	4.054	0.05988	Afap1l1
-0.7214	4.595	0.05988	Ahsa1
-0.6775	6.77	0.05988	Ptpn5
1.64	5.158	0.05988	Kcnmb2
-0.5713	5.466	0.05988	Tcp1
1.037	6.119	0.05988	Clmn
-0.7626	5.302	0.05988	C1ql3
-0.7544	5.313	0.05988	Nudc
0.5092	6.579	0.05988	Cop1
0.623	5.937	0.05988	Ncoa3
-0.4539	5.845	0.05988	Set
-0.8006	3.842	0.05988	Ubl5
-1.361	6.892	0.05988	Nkain3
-0.6914	5	0.05988	Fbxo10
-0.6893	5.818	0.05988	Fkbp3
0.5553	6.559	0.05988	Itgav
-0.8707	4.303	0.05988	BC031181
-0.8158	5.793	0.05988	Calb1
-1.403	1.574	0.05988	Gm15489
-0.5716	5.99	0.05988	Usp11
-1.074	3.385	0.05988	Atp6ap1l
0.6568	6.191	0.05988	Arhgap17
-0.9522	3.858	0.05988	Ndufc1
-1.014	5.185	0.06022	Tmsb10
-0.7668	6.226	0.06022	Syt4
-0.5124	5.208	0.06152	Ankrd46
0.8607	3.779	0.0619	Atp10d
-0.5454	7.724	0.06207	Ywhab
0.9129	6.432	0.06207	Akap13
-0.7149	8.203	0.06207	Camk2n1
0.6777	6.744	0.06278	Rb1
-0.946	5.329	0.06278	Pcsk1n
3.125	5.404	0.06278	St18
-0.5346	5.984	0.06278	Nlgn3
-0.6617	6.9	0.06307	Eno2
-0.8044	3.386	0.06307	Cox14
-0.9391	2.99	0.06307	Mea1
0.8158	6.959	0.06376	Dleu2
-0.5981	5.168	0.06376	Psmc2
-0.6908	6.142	0.06376	Stmn3
-0.7864	4.669	0.06383	Nme1
2.37	2.615	0.06394	C030029H02Rik
-0.8073	4.457	0.06394	Rpl24
-1.126	2.826	0.06394	Rab26
-0.5593	5.343	0.06394	Rnf187
-0.6544	6.485	0.06394	Cdk5r1
1.006	6.058	0.06394	Rab31
1.326	3.68	0.06394	Traf5
-0.6679	6.207	0.06506	Rundc3b
-0.4978	6.486	0.06593	Gaa
1.331	5.29	0.06678	Kcnk13
-0.4619	6.108	0.06678	Uba1
1.468	5.66	0.06678	Lpcat2
1.406	4.757	0.06678	Syne2
0.9821	5.957	0.06678	Ulk4
2.738	3.51	0.06678	Gm40578
1.867	3.921	0.06678	Pik3r5
-1.146	3.266	0.06678	Kcng1
-0.6609	6.145	0.06678	Nefl
0.5627	5.743	0.06678	Wls
-0.662	4.826	0.06678	Cox5a
1.092	5.193	0.06678	Rassf3
-1.272	4.115	0.06678	Slc32a1
-0.7648	5.336	0.06678	Cox8a
0.9003	4.493	0.06678	Plxdc1
-0.915	3.848	0.06678	Zic1
1.547	6.529	0.06678	Dock1
0.6732	5.861	0.06678	Arhgap15
-0.8674	3.636	0.06678	Atp5k
-0.9931	3.436	0.06678	Ndufa2
-1.189	3.264	0.06678	Tram1l1
-0.7368	7.161	0.06678	Scg2
1.589	4.029	0.06678	Alpk1
-0.6359	5.698	0.06678	Tuba4a
2.144	1.924	0.06678	Xaf1
1.318	4.22	0.06678	Nedd9
0.8259	5.38	0.06678	Stard9
-0.5674	6.798	0.06678	Skp1
-0.6449	8.327	0.06678	Ahi1
0.8297	5.271	0.06678	Tpk1
-0.5239	5.237	0.06678	Gnb2
0.6191	5.035	0.06678	Tmod3
1.325	5.873	0.06678	E230029C05Rik
-1.218	4.139	0.06678	Lrrtm1
0.817	5.492	0.06678	Slc10a7
-0.7343	5.271	0.06678	Cacna1h
-0.7578	3.555	0.06678	Hspe1
0.6691	6.251	0.06678	Otud7b
-0.9164	4.617	0.06678	Pebp1
-0.5629	5.863	0.06678	Mdh2
-0.5631	5.896	0.06678	Mlf2
-0.6469	8.387	0.06678	Kif5c
0.4357	6.788	0.06678	Fnip1
-0.6042	5.576	0.06678	Eid1
1.65	5.272	0.06678	Plekhg1
-0.5032	6.36	0.06678	Eif1
-0.534	5.092	0.06678	Cct5
-0.8648	4.048	0.06678	Doc2b
-0.6525	6.519	0.06678	Rab3a
-0.8673	4.215	0.06678	Syngr3
1.332	4.867	0.06678	Man2b1
-1.141	2.703	0.06678	Mmp15
-1.227	2.442	0.06678	6430584L05Rik
-0.6167	7.777	0.06678	Galnt17
0.5326	8.437	0.06678	Pex5l
1.104	4.744	0.06678	Crlf3
1.98	3.091	0.06678	Spag16
0.9411	7.097	0.06678	Etv6
-0.6169	4.197	0.06678	Rps2
-0.8674	6.323	0.06678	Plk2
0.4678	6.298	0.06678	Herc4
1.234	4.191	0.06678	Pot1b
-0.7918	12.68	0.06678	Lars2
0.8065	6.457	0.06678	Man1c1
-0.629	3.716	0.06738	Trnp1
0.907	4.298	0.06744	Ubtd1
1.791	6.002	0.06744	Fli1
0.6134	4.616	0.06744	Bcl9l
-0.6145	7.323	0.06744	Pkm
-1.227	2.048	0.06744	1700001L19Rik
1.696	5.362	0.06744	Gab1
0.9914	3.782	0.06744	Ralb
-0.6098	5.014	0.06744	Cox7b
-0.5846	6.482	0.06744	Actg1
0.6972	5.95	0.06744	Fnip2
1.378	4.879	0.06744	Creb3l2
-0.7855	6.192	0.06744	Lmo3
-1.034	3.061	0.06744	Kif27
0.8173	5.607	0.06744	Cerk
0.4881	5.663	0.06744	Rbpj
0.7816	6.765	0.06744	Cdk19
-0.922	3.489	0.06744	Pdzd11
0.9255	8.19	0.06744	St6galnac3
-0.5761	4.845	0.06744	Rbx1
0.637	4.78	0.06744	Vegfa
-1.253	4.323	0.06744	Zfp729a
-0.5027	6.994	0.06744	Ghitm
1.498	5.944	0.06744	Entpd1
-0.7858	4.539	0.06744	Rxrg
2.152	2.721	0.06744	Il15
0.9347	6.351	0.06744	Slc12a2
0.7808	7.067	0.06744	Chn2
0.6731	7.117	0.06744	Bin1
1.665	3.463	0.06744	Lzts2
1.957	2.264	0.06744	Sox13
-1.336	1.818	0.06744	Prps1l3
1.192	4.834	0.06744	Phldb1
0.6202	6.465	0.06744	Znrf3
1.162	4.863	0.06748	Gm10125
-0.5813	4.62	0.06768	Aamp
-1.848	4.306	0.06843	Calb2
2.843	4.122	0.06843	Mal
-0.7425	3.459	0.06843	Rpl15
-0.434	6.741	0.06843	Morf4l1
-0.6573	4.608	0.06843	Chchd2
-0.5989	4.362	0.06843	Ppp2cb
1.45	4.017	0.06843	Prkd3
-1.322	2.335	0.06843	Gm26854
-0.5618	8.752	0.06843	Calm2
0.4932	5.478	0.06843	Slc39a11
-0.6893	3.536	0.06843	Tmem185a
0.5867	5.207	0.06843	Slc38a6
-0.7911	4.227	0.06843	Lrtm2
-0.7659	6.157	0.06843	Akap5
-1.082	4.122	0.06843	Glra3
1.776	6.465	0.06843	Dock2
0.9128	4.344	0.06843	Sh3pxd2b
-0.5194	4.499	0.06906	Idh3g
0.4811	5.983	0.06922	Clk1
-1.145	3.66	0.06922	Hras
-0.6938	3.952	0.06934	Chrnb2
-0.861	4.124	0.06947	Arpc5l
-0.6225	4.474	0.06947	Cops6
-0.988	2.875	0.06947	Nbl1
-0.4255	6.92	0.06947	Ptms
-0.6216	3.631	0.06947	Mrps17
-0.6963	5.26	0.0695	Atp5h
1.039	8.789	0.0695	Plcl1
-0.5865	8.217	0.0695	Map1a
-0.5602	6.012	0.0695	Stip1
-0.9014	3.299	0.0695	Mrps14
-0.6187	6.139	0.0695	Nlgn2
-0.8943	2.42	0.0695	Mrpl16
0.4512	5.984	0.06951	Mia2
0.6384	7.832	0.06951	Phlpp1
-0.526	6.374	0.06951	Enpp5
0.4836	6.874	0.06951	Irf2
1.136	5.988	0.06951	Gna12
-1.086	2.698	0.06951	4632415L05Rik
-0.7509	3.235	0.06951	Wdr18
0.5554	5.784	0.06951	Pign
-0.486	5.216	0.06951	Atp6v0e2
-0.5866	7.713	0.06951	Napb
-0.4467	5.708	0.0696	Myl12b
-0.6803	4.96	0.0696	Trim32
1.199	4.227	0.0696	Rhobtb1
6.972	1.838	0.0696	Sst
-0.5429	5.856	0.0696	Vopp1
-1.436	1.962	0.0696	Gpr165
-0.4676	5.956	0.06962	Dnaja2
-0.836	5.465	0.06979	Pnma8a
-1.39	3.278	0.06979	9330185C12Rik
0.3998	7.19	0.06979	Fryl
0.3981	6.416	0.06979	Vps54
1.372	3.606	0.06979	Swap70
1.243	2.992	0.06979	Gm26782
-0.473	5.358	0.06979	Ctbp1
0.6831	6.286	0.06979	Kif13b
0.7379	7.935	0.06979	Mbnl1
-0.6893	3.265	0.06979	Bloc1s2
1.725	4.771	0.06979	Adap2
2.19	5.246	0.06979	Hpgds
0.5965	6.333	0.06979	Mgat4a
-0.6367	8.283	0.06979	Ndrg4
1.744	4.18	0.06979	Cd33
1.406	4.63	0.06979	Wdfy4
0.5387	7.009	0.06979	Lcorl
-0.5619	5.694	0.06979	Grina
0.8027	5.722	0.06979	Cttnbp2nl
1.981	4.561	0.06979	Cd86
-0.6389	7.033	0.06985	Dynll2
0.7285	4.825	0.06985	Gm4876
-0.5848	4.102	0.06985	Ampd2
1.586	4.701	0.06985	Rassf2
0.7746	5.976	0.06985	Arhgap23
1.049	4.051	0.06985	Samhd1
0.5424	4.539	0.06985	1600020E01Rik
1.178	6.362	0.06985	Bmp2k
-1.046	3.077	0.06985	Cdo1
1.516	2.959	0.07014	Nkd1
-0.5143	8.418	0.07073	Nsf
-0.7184	3.765	0.07138	Eif3k
-1.565	8.641	0.0716	Tafa1
1.509	2.406	0.0716	Gm7240
1.129	5.546	0.07164	Arhgap31
-1.457	7.677	0.07189	Reln
1.685	4.07	0.07193	Shroom3
-0.558	8.18	0.07193	Ywhaz
1.073	4.338	0.07203	Parvb
-0.731	3.882	0.07229	Ndufb2
1.078	2.562	0.07233	Cenpj
-0.6438	4.657	0.07233	Ndufc2
1.602	7.44	0.07233	Tgfbr1
1.271	6.199	0.07233	Arhgap22
-0.6251	4.553	0.07233	Irf2bpl
0.6775	6.222	0.07233	Lrrc8d
-0.6078	6.465	0.07233	Hpcal4
-0.6313	5.805	0.0724	Tubb2a
0.837	4.935	0.07272	Stxbp3
-0.5001	4.298	0.07275	Eef1d
1.291	4.015	0.07275	Phactr4
1.403	1.935	0.07275	Gm11973
-0.6134	6.779	0.07315	Lmo7
-0.5209	5.065	0.07315	Tubb4b
0.8976	5.671	0.07315	Soga1
1.166	5.535	0.07328	Tns1
0.637	4.544	0.07328	Fam228b
-0.5823	3.826	0.07328	Ubxn6
0.916	4.735	0.07328	Slc16a10
-0.588	4.858	0.07328	Ppp2r5d
1.571	5.59	0.07328	Daam2
1.993	2.821	0.07328	Acer2
0.9948	5.398	0.07328	Znrf2
0.4606	4.949	0.07328	Fam76b
1.276	4.678	0.07328	Fam20a
1.041	2.452	0.07358	D130019J16Rik
-0.7703	4.721	0.07358	Ap1s1
1.869	4.939	0.07358	Tspan2
0.7273	5.927	0.07358	Myo1d
0.7173	5.623	0.07368	Elf2
0.5413	5.09	0.07383	Mcmbp
1.123	5.361	0.07433	Aff1
-0.6228	6.354	0.07433	Slc22a17
1.382	3.795	0.07433	Parp4
0.5931	5.717	0.07433	Pou2f2
0.4356	7.604	0.07433	Dip2b
-0.4765	6.321	0.07433	Snx12
-0.4928	5.145	0.07433	Cmpk1
0.9298	4.957	0.07433	Cntrl
0.5335	5.883	0.07433	Rnf115
-0.5424	4.072	0.07433	Ramac
1.86	4.801	0.07433	Blnk
1.929	4.575	0.07433	Il6ra
-1.39	2.715	0.07433	Pafah2
-0.7027	7.653	0.07433	Pdzrn4
-0.8691	3.822	0.07433	Cetn2
-1.204	2.301	0.07433	Amigo2
0.5334	7.828	0.07433	Tcf12
-0.4028	5.784	0.07433	Mmd
-0.4003	7.497	0.07433	Arf3
0.6825	5.422	0.07433	Pfkfb3
-0.5921	6.156	0.07433	Zcchc18
0.4392	5.121	0.07433	Slc30a7
-0.5337	3.904	0.07433	Thnsl1
-0.5492	4.836	0.07433	Car11
-0.6659	4.622	0.07433	Ece2
-0.6695	6.476	0.07433	Tspyl4
1.482	6.36	0.07433	Lyn
-0.4501	4.936	0.07433	Chst10
2.301	4.294	0.07433	Cdh19
0.4715	7.795	0.07433	Wnk1
0.4598	7.722	0.07433	Baz2b
-0.631	6.319	0.07433	Disp2
2.094	3.691	0.07433	A630001G21Rik
-0.9254	2.566	0.07433	Ngrn
1.263	5.434	0.07433	0610040J01Rik
1.218	3.837	0.07433	Cyp4f13
1.62	5.398	0.07433	Lair1
-0.7254	3.441	0.07433	Gal3st3
1.735	4.501	0.07433	Lrrk1
-0.783	3.93	0.07433	Rps25
-0.5285	9.356	0.07433	Fat3
-0.6635	4.05	0.07463	Ndufa8
-0.8323	4.174	0.07521	Ndufb10
0.7105	5.786	0.07521	Zfand6
-0.6936	5.097	0.07521	Cxxc4
0.4292	5.692	0.07521	Fnbp4
-0.4814	5.437	0.07521	Naca
2.339	3.974	0.07546	Il33
-0.76	4.026	0.07562	Arl14ep
-0.63	3.643	0.07562	Zfp574
-0.5993	7.096	0.07562	Gapdh
-0.7534	4.392	0.07562	Pnma2
-0.9271	5.234	0.07562	Btbd11
0.5954	5.223	0.07562	Plekhm2
-0.727	4.581	0.07562	Ckmt1
1.489	4.552	0.07587	Fmnl3
-0.6941	6.021	0.07589	Nrn1
-0.8379	3.126	0.07589	Pnck
-0.736	4.234	0.07589	Armcx2
1.03	7.247	0.07601	Ubash3b
0.6047	6.615	0.07603	Cep85l
-0.5293	4.299	0.07607	Ndufv3
-0.6382	6.164	0.07651	Ubqln2
-1.03	3.388	0.07651	Timm8b
-0.859	4.1	0.07651	Gm36975
2.586	5.481	0.07651	Trf
1.55	7.306	0.07651	Mertk
-0.6705	4.32	0.07707	Cox6b1
0.4446	6.893	0.07707	Tet3
1.267	3.135	0.07707	Tifa
0.4068	8.032	0.07738	Eif4g3
1.43	4.956	0.07761	Myo1e
-0.3488	6.089	0.07784	Mff
-0.4725	5.928	0.07784	Gmps
0.5179	5.202	0.07784	Chaserr
-0.645	3.383	0.07784	Rtn2
1.794	3.797	0.07784	Grin2c
1.173	2.851	0.07784	Map3k11
-0.5239	6.032	0.07784	Tle5
1.453	4.305	0.07784	Pik3cd
0.8348	5.019	0.07784	Nnt - ENSMUSG00000025453
-0.5223	8.68	0.07791	Hsp90ab1
1.41	3.894	0.07818	Mob3b
0.9216	5.356	0.07818	Adamtsl1
-0.6603	7.515	0.07818	Elmod1
-0.7066	4.389	0.07832	Cisd1
0.587	4.473	0.07833	Fancl
-0.6003	3.859	0.07833	Snrpa
0.7811	5.766	0.07883	Raly
0.9121	7.528	0.07888	Pip4k2a
1.993	2.703	0.07888	Prkcq
0.838	4.359	0.07935	Tpst2
-0.6609	3.763	0.07935	Tmem179
1.558	4.628	0.07935	Pde8a
-0.4083	6.161	0.07935	Dlg3
1.996	2.048	0.07935	Nedd1
-0.5526	4.026	0.07935	Tprgl
-2.217	1.303	0.07935	Zfp185
0.7379	4.85	0.07935	Adam17
1.992	4.579	0.07935	Fcrls
0.7305	3.736	0.07935	Ccnd1
1.139	4.773	0.07935	Bcar3
0.8125	4.47	0.07943	Mcl1
0.7773	4.455	0.07943	Tom1
-0.6996	5.742	0.07943	Ppia
-1.303	7.539	0.08021	Kif5a
0.5982	4.923	0.08094	Atp7a
-0.4331	6.34	0.08094	Usp14
-0.7778	3.022	0.08094	Micos13
-0.6994	3.213	0.08094	Cops9
1.069	4.765	0.08094	Rffl
-0.6006	3.993	0.08094	Srp14
-1.463	5.114	0.08094	Ndnf
3.087	2.772	0.08094	Fa2h
-0.5436	8.172	0.08094	Aff3
-0.7516	2.864	0.08094	Oprl1
-0.4632	5.731	0.08094	Ndufv2
2.035	6.244	0.08094	Runx1
0.7104	6.348	0.08094	Kansl1l
-0.463	5.15	0.08104	Hdgf
-1.405	3.742	0.08104	Marcksl1
0.4782	5.979	0.08104	Fbrsl1
-0.6772	4.75	0.08118	Atp5o - ENSMUSG00000022956
-0.5736	3.962	0.08118	Vma21
0.5694	6.156	0.08118	Nuak1
0.4915	6.036	0.08118	Mxi1
-0.5694	5.47	0.08118	Gmfb
-0.4299	4.501	0.08118	Psma4
-0.54	5.512	0.08118	Mfn2
-0.6603	3.862	0.08118	Kat5
-0.4174	6.169	0.08118	Atp5pb
-0.5002	5.62	0.0812	Zkscan1
-0.9857	2.075	0.0812	Mchr1
-0.7739	3.918	0.0812	Mif
-0.8586	3.581	0.0812	Psmb4
-0.6814	3.881	0.0818	Atp6v1f
0.411	6.632	0.0818	Rnf216
-0.6796	5.365	0.08211	Cox6c
-0.7544	3.857	0.08266	Cycs
0.8244	6.834	0.08266	Gm3764
-0.6371	7.02	0.08266	Mdh1
-0.5143	4.368	0.08266	Paip2b
-0.6219	5.01	0.08319	Tpt1
-0.6699	3.84	0.08319	Esd
1.936	3.28	0.08319	St8sia6
-0.5915	6.128	0.08319	Pgap1
0.7089	6.209	0.08319	Bcl2l1
2.219	4.285	0.08319	Gm16168
1.712	6.197	0.08319	B2m
0.9881	4.794	0.08319	Tor1aip1
-0.5878	9.318	0.08319	Robo1
0.6563	6.168	0.08319	Sema4d
0.4176	6.077	0.08319	E2f3
-0.5505	5.432	0.08319	Eif1ax
0.3724	5.423	0.08319	Slain2
1.973	3.019	0.08319	Cmtm7
1.065	5.451	0.08319	Pdlim5
1.92	4.754	0.08319	Cnp
1.464	3.31	0.08321	Eif2ak2
-0.9059	7.07	0.08352	Pcp4
-0.41	6.932	0.08401	G3bp2
0.3402	6.735	0.08401	Pou2f1
1.682	3.785	0.08401	Rin3
0.9469	3.628	0.08401	Ldlr
-4.029	1.905	0.08405	Gm49692
-0.5111	4.869	0.08405	Kcnq1
-0.5142	5.606	0.08405	Idh3a
-0.5748	4.064	0.08405	Gid8
0.9972	6.161	0.08405	Zfp710
0.5998	5.824	0.08405	Git2
-0.5949	6.013	0.08405	Mllt11
0.599	4.084	0.08405	Prpsap1
1.418	3.215	0.08405	Myo18b
-0.8678	2.87	0.08405	Mrpl40
1.641	3.979	0.08405	Litaf
1.235	4.393	0.08405	Dusp16
-0.3766	6.16	0.08405	Rab5a
1.355	5.585	0.08405	Lhfpl2
0.5302	6.042	0.08405	Rnf38
-1.167	2.732	0.08405	Nanos1
-0.674	4.657	0.08405	Rraga
0.371	7.382	0.08405	Arid1a
-0.4611	5.107	0.08405	Cct3
1.216	4.319	0.08405	Slc29a3
-0.4818	4.662	0.08405	Cibar1
0.6828	6.169	0.08405	Vgll4
1.32	4.965	0.08405	Pros1
0.871	4.547	0.08405	Hps4
1.336	2.604	0.08405	Slc2a9
1.808	1.838	0.08405	Col16a1
-0.7061	4.462	0.08405	Glp2r
1.469	5.488	0.08405	Wipf1
0.8513	3.715	0.08405	Gm37472
-0.4629	5.472	0.08405	Zfp706
1.355	2.29	0.08405	ENSMUSG00000120831
2.316	3.417	0.08405	Tmem63a
0.5715	6.339	0.08405	Atosa
0.6654	4.375	0.08405	Arrb2
-0.6275	8.19	0.08405	Hspa8
-0.5734	6.904	0.08405	Stx1b
1.812	5.884	0.08405	Dock8
-0.5564	4.989	0.08405	Dpysl3
-0.5145	11.38	0.08405	Nrg1 - ENSMUSG00000062991
-0.766	2.828	0.08405	Mien1
-0.6558	5.851	0.08405	Cntnap1
-0.5233	6.368	0.08405	Pfn2
1.255	3.194	0.08405	Adgra3
-0.8161	2.882	0.08405	Mcrs1
1.5	4.452	0.08405	Spsb1
-1.279	2.169	0.08405	Ssna1
-0.5823	7.01	0.08405	Bcr
-0.5822	5.444	0.08405	Tspyl1
-0.4968	6.34	0.08405	Atp6v1d
1.822	3.984	0.08405	Cdc14a
-0.485	5.06	0.08405	Idh3b
-0.5579	16.68	0.08405	Rn18s-rs5
-0.6956	4.549	0.08405	Rusc1
-1.051	2.927	0.08405	Nptx2
-0.4502	5.843	0.08405	Ipo5
-0.5418	4.66	0.08405	Gm21988
-0.4873	4.312	0.08405	Psmd8
-0.5095	8.141	0.08405	Chn1
-0.5997	7.559	0.08405	Nsg2
-0.4657	7.272	0.08405	Gpi1
-0.5412	7.825	0.08405	Fam135b
1.985	3.145	0.08405	Nlrp1c-ps - ENSMUSG00000092528
0.5055	4.302	0.08405	Platr25
0.8013	7.331	0.08405	Gab2
0.4165	6.408	0.08405	Mbtd1
2.173	1.511	0.08413	Alpl
-1.059	2.129	0.08436	Rsph14
1.871	3.293	0.08436	Pla2g4a
0.4987	4.626	0.08456	Zfp182
-0.6467	6.823	0.08456	Pnma8b
1.063	3.023	0.08456	Dtx2
-0.7047	3.343	0.08461	Znhit1
0.9013	4.873	0.08467	Phyhd1
1.619	5.317	0.08467	Abca9
1.835	3.962	0.08467	Gm5086
1.788	3.61	0.08467	Lrp5
1.043	4.479	0.08467	Il18
-0.5557	3.396	0.08467	Hypk
-0.4191	7.532	0.08467	Tcf25
0.4721	5.54	0.08467	Ccdc93
0.6749	6.884	0.08467	Hipk2
1.453	5.689	0.08467	Fyb
-0.7315	7.778	0.08467	Cdh8
2.964	3.538	0.08467	Lyz2
0.5577	3.948	0.08467	Mlh1
-0.5813	6.232	0.08467	Cpne5
0.6154	7.818	0.08467	Sirpa
-0.5107	5.64	0.08467	Tomm20
0.7217	5.133	0.08467	Ppard
2.053	1.556	0.08467	Smad6
-0.8826	5.41	0.08467	Dynll1
0.97	6.624	0.08467	Rrbp1
-0.4772	8.795	0.08467	Rtn1
0.3683	6.093	0.08467	Rsrc2
1.095	4.717	0.08467	Vav2
-0.3865	6.102	0.08467	Spin1
1.24	4.61	0.08467	Elf1
-0.5458	4.948	0.08493	Rpl14
1.541	5.421	0.08493	Tgfbr2
-0.5019	7.358	0.08509	Vamp2
-0.7065	3.154	0.08509	9630010A21Rik
1.997	1.661	0.08552	C030018K13Rik
1.651	4.953	0.08552	Prdm16
-0.4501	6.128	0.08552	Rnf14
-0.4908	4.449	0.08552	Rab1b
1.931	1.816	0.08552	Rhpn2
-0.6171	7.387	0.08584	Cadm3
1.027	3.498	0.08584	Fgd3
1.815	2.706	0.08584	Kcnk6
1.997	3.891	0.08584	Ctsh
-0.5409	4.563	0.08584	Ndufb5
1.305	4.39	0.08584	Cdk6
-1.053	2.324	0.08584	Dbndd1
1.349	3.349	0.08584	Arap3
-1.243	4.724	0.08584	Id4
-0.6251	4.55	0.08584	Agpat1
0.6711	3.142	0.08584	Zkscan6
-1.123	2.407	0.08584	Gm9962
-0.56	5.17	0.08584	Tceal3
-0.6217	6.196	0.08584	Sgtb
1.517	2.695	0.08584	1700028E10Rik
0.9724	3.469	0.08584	Tmem123
3.173	2.097	0.08584	Col15a1
-1.25	3.638	0.08584	Tmem132e
-0.489	5.238	0.08584	Polr2m
-1.353	3.126	0.08584	Gm54867
1.477	3.638	0.08584	Pstpip2
0.6449	6.247	0.08584	Kif13a
-0.5049	5.009	0.08584	Psmc5
-0.6575	3.754	0.08602	Mcrip1
-0.5731	8.724	0.08607	Filip1l
-1.063	3.564	0.08623	Vwa5b1
0.3768	7.727	0.08623	Fam172a
1.124	6.831	0.08623	Mitf
0.396	6.199	0.08623	Mfhas1
-0.4659	5.39	0.08623	Suclg1
-0.5201	4.785	0.08623	Fcho1
-0.493	4.223	0.08639	Dnaja4
-0.5375	6.291	0.08655	Tspan3
-0.5378	9.488	0.08655	Ptprn2
2.459	1.653	0.08657	Adgre5
-0.5615	7.703	0.0867	Ndfip1
0.8664	4.479	0.0867	Gm26542
1.913	5.728	0.0867	Mpeg1
-0.8171	3.676	0.08681	Rin1
-0.9929	2.601	0.08681	Vcpkmt
1.29	4.489	0.08685	Ppfibp2
0.9466	3.13	0.08685	Acaa1a
1.044	7.071	0.08685	Cdh20
-0.7055	3.972	0.08685	Ndufb3
1.943	1.917	0.08685	C030005K06Rik
0.5077	4.965	0.0869	Cilk1
2.238	3.749	0.08695	Hpgd
-0.8236	5.325	0.08704	Klhl13
-0.5621	6.809	0.08704	Gucy1b1
-0.554	3.838	0.08704	Abhd13
1.811	3.097	0.08704	Gna15
0.344	5.876	0.08704	Otud4
0.7739	4.919	0.08704	Tle3
1.089	4.996	0.08704	Pou6f2
-0.4907	9.419	0.08704	Calm1
2.484	1.997	0.08704	Gm26510
1.526	4.154	0.08704	Elovl7
-0.5528	4.412	0.08726	Uqcrb
0.7108	3.616	0.08732	Sh2b3
-0.7653	3.739	0.08732	Gpr173
-0.5887	3.958	0.08732	Cdipt
-0.7818	3.577	0.08742	Atp5mpl
-0.5605	4.937	0.08749	Mn1
1.453	5.812	0.08749	Lama2
-0.6524	3.761	0.08749	Ndufb1
2.02	2.466	0.08749	Lsp1
1.603	2.628	0.08793	Parp9
-0.6742	4.657	0.08817	ENSMUSG00000121307
-0.6111	3.817	0.08817	Ecsit
0.4287	5.545	0.08817	Garre1
0.5699	6.248	0.08849	Susd6
0.6038	5.658	0.08849	Mlxip
0.6901	5.255	0.08856	4930488L21Rik
0.5229	6.329	0.08858	Dnm2
-0.5232	4.978	0.08885	Pgk1
0.4822	5.799	0.08885	Lncppara
0.8773	5.482	0.08885	Pacs2
0.9374	4.465	0.08885	Cbfb
-0.5892	3.445	0.08885	Ccdc43
4.608	2.096	0.08898	A830036E02Rik
-0.5895	5.243	0.08898	Fam3c
0.7292	5.873	0.08899	Ptbp3
1.129	2.28	0.08899	8030453O22Rik
0.7016	5.97	0.08899	Itpk1
0.6655	5.286	0.08899	Spata13
-1.02	3.46	0.08899	Mrpl41
-0.4593	8.448	0.08899	Sptan1
-0.679	3.771	0.08899	Gprasp2
0.502	7.115	0.08899	Map4k4
1.709	5.755	0.08899	Gm2629
0.7852	5.143	0.08899	Gm33989
-0.6113	4.636	0.08899	Cstf2t
-0.3671	5.6	0.08899	Vdac2
2.37	8.089	0.08899	Plp1
0.7048	4.596	0.08899	Mtmr10
-1.239	2.365	0.089	Phex
-0.6198	3.836	0.08929	Srp9
-0.6706	6.081	0.08977	Scn2b
-0.5931	6.206	0.08977	Nsg1
-0.7813	3.925	0.08977	Gm44562
1.424	6.837	0.08977	Csf1r
-0.7753	2.598	0.08977	Polr2j
-0.4575	6.394	0.08977	Pgrmc1
-0.7091	4.431	0.08977	Edf1
1.465	2.094	0.08977	Adssl1
1.12	6.477	0.08977	Ankrd44
0.6815	5.598	0.08978	Pak2
1.204	5.393	0.08998	Golm1
-0.3981	7.728	0.0901	Atp6v1a
0.4195	7.486	0.09027	Pan3
0.6193	4.909	0.09027	Snap23
-0.561	5.846	0.09043	L1cam
-0.4754	6.997	0.0907	Gdi1
-0.4915	4.222	0.0907	Cyc1
2.106	5.021	0.0907	AU020206
0.431	6.962	0.0907	Ppp6r3
-0.4009	5.205	0.09086	Sdhb
-1.704	1.955	0.09113	Gpr101
-1.075	4.337	0.09113	Flrt3
3.415	1.462	0.09113	Insc
-0.6029	4.3	0.09129	Gpx4
1.158	7.555	0.09129	Epb41l2
1.861	4.822	0.09129	Csf3r
-0.5563	3.697	0.09129	Ptcd1
0.3812	6.882	0.09129	Zfp532
-0.4296	7.07	0.09129	Trim37
-0.4974	6.687	0.09129	Slc24a4
-0.4284	5.629	0.09129	Saraf
-0.7861	2.199	0.09129	Alas2
1.387	3.876	0.09129	Dapp1
1.199	6.116	0.09132	Itpr2
-0.4147	7.138	0.09136	Purb
-0.4948	3.854	0.09136	Slc25a11
-0.6107	7.254	0.09175	Eef1a2
-0.9316	6.197	0.09177	Ndst3
1.065	4.621	0.09191	Arsg
1.428	1.7	0.09251	Cd200r1
-0.8849	3.093	0.09261	Srm
1.13	2.656	0.09261	Ppox
-0.427	7.133	0.09268	Itm2c
1.571	2.157	0.09275	6430590A07Rik
-0.5113	5.195	0.09277	Fkbp8
0.5891	6.604	0.09277	Phkb
-0.7259	3.801	0.09277	Ndufb7
0.9149	2.594	0.09277	Mvp
-0.6849	3.746	0.09277	Vps28
0.7171	4.405	0.09277	Mettl15
-0.5518	5.733	0.09277	Chrm1
-0.4942	7.729	0.09277	Ywhah
-0.6732	3.355	0.09277	Nudt19
2.8	0.6515	0.09277	Gm48508
-0.4139	4.732	0.09277	Sar1b
-1.381	3.604	0.09277	Baiap3
0.6195	5.58	0.09277	Galnt10
1.248	2.582	0.09277	BC035044
-0.4022	4.739	0.09277	Puf60
2.166	3.253	0.09277	Niban1
1.017	3.215	0.09277	Tatdn3
0.8708	3.534	0.09277	Lnx2
-0.3246	6.444	0.09277	Sf3b2
-0.4862	7.182	0.09277	Impact
1.211	2.502	0.09277	Gm38642 - ENSMUSG00000111219
0.4293	5.905	0.09277	Prpf39
-0.9926	2.252	0.09277	Coq7
-0.508	9.122	0.09277	Ntrk3
-0.3735	7.6	0.09277	Epb41l1
-0.7983	3.052	0.09277	Rnf208
-0.7481	4.695	0.09277	Tceal5
-0.9269	1.893	0.09277	Zfp354b
0.6739	7.974	0.09277	Foxn3
1.882	5.896	0.09277	Ikzf1
-0.4876	6.33	0.09277	Mir124a-1hg
-1.103	2.782	0.09277	Gm28756
-0.5894	5.641	0.09277	Habp4
-0.8107	4.886	0.09277	Prxl2a
-0.4999	4.122	0.09277	Hint1
-0.5178	6.391	0.09277	Ensa
1.456	4.313	0.093	Arap1
2.578	4.202	0.09326	Ugt8a
-0.7282	3.536	0.09326	Kbtbd7
0.8796	2.636	0.09398	Cav2
-0.5457	6.709	0.09433	Tpm1
-0.3857	5.809	0.09447	Zmat2
-0.4208	6.274	0.09447	Fez1
-0.5072	7.447	0.09447	Slc12a5
0.4048	6.342	0.09447	Stx8
2.253	2.898	0.09447	Sp100
0.6688	8.266	0.09447	Zeb1
-0.5905	6.914	0.09447	Snrpn
0.5439	5.384	0.09447	Cpped1
-0.7082	4.353	0.09447	Ssbp4
1.092	8.749	0.09447	Qki
0.6006	6.224	0.09447	Gm4258
-1.281	2.586	0.09447	Rnd2
1.343	3.516	0.09447	Sorbs3
-0.4832	3.999	0.09447	Zfp386
0.5721	5.226	0.09447	Mipol1
0.3388	6.714	0.09447	Smad3
2.126	4.478	0.09447	Cd84
1.187	4.823	0.09447	Acss1
1.148	3.706	0.09447	Cast
-0.4544	4.851	0.09447	Otud6b
1.148	3.054	0.09447	Rtp4
-0.6123	3.665	0.09447	Spag6l
1.509	5.263	0.09447	Pnpla7
-0.8212	4.014	0.09447	Cnih2
-0.4956	5.306	0.09447	Emc7
2.204	2.877	0.09447	Xdh
-0.681	3.275	0.09447	Gm50024
0.8256	3.246	0.09447	Pir
-0.8323	2.603	0.09447	1110059G10Rik
1.353	1.885	0.09447	Mms22l
-0.535	3.449	0.09447	Abhd17a
-0.5923	4.963	0.09447	Bag1
-0.7003	2.849	0.09447	Apex1
1.779	3.714	0.09447	Gm26512
0.3809	6.678	0.09447	St3gal3
0.8406	6.186	0.09447	Sipa1l2
0.3618	6.204	0.09447	Pibf1
1.334	3.401	0.09447	Gldc
1.742	2.867	0.09447	Ccnb1ip1
1.485	3.764	0.09447	Gltp
-0.4943	6.962	0.09447	Chd3
-0.4993	6.719	0.09447	Lonrf2
-0.3747	6.991	0.09447	Ociad1
-0.5511	4.573	0.09447	Gtf2h5
-0.8088	4.472	0.09447	Rpl31
-1.757	4.126	0.09447	Peg10
0.4945	6.756	0.09447	Rps6ka5
-1.315	2.328	0.09447	Gm12709
-0.5821	7.194	0.09447	Snca
1.531	5.513	0.09447	Rasgrp3
-0.7643	3.014	0.09447	Ndufb11
1.264	4.346	0.09447	2610203C22Rik
-0.5248	5.836	0.09447	Pdzd4
1.948	3.193	0.09447	Pmp22
0.7909	3.924	0.09447	Grk4
2.275	3.486	0.09447	F11r
1.464	3.854	0.09447	Slc25a13
-1.133	3.248	0.09447	Gm49969
-0.6432	3.876	0.09461	Gabrd
-0.6488	5.422	0.09461	Pcdh19
-0.5135	4.083	0.09471	Gm43439
0.5572	4.545	0.09471	Zfp961
-0.5715	4.286	0.09471	Amigo1
0.6639	3.871	0.09473	Trmt13
-0.4364	5.04	0.09483	Adcy3
-0.4425	9.472	0.09484	Myt1l
0.4795	5.744	0.09484	Ints6l
-1.882	1.998	0.09484	Gm36251
1.547	4.64	0.09484	Cyth4
-0.5052	5.172	0.09484	Actr10
0.6667	4.535	0.09484	Qdpr
-0.4907	4.922	0.09484	Map1lc3b
1.007	5.289	0.09484	Septin4
0.9164	2.955	0.09484	Zkscan17
-0.3759	6.137	0.09484	Copg1
-0.6146	4.518	0.09484	Zrsr1
-0.4446	4.672	0.09484	Sgta
-0.6143	5.199	0.09484	Rnf227
-0.7415	3.271	0.09484	Mrpl50
0.4609	5.27	0.09484	Morc3
0.5796	7.166	0.09484	Ophn1
0.582	5.172	0.09484	Mtr
1.838	3.068	0.09484	Slc40a1
1.277	5.992	0.09484	Tns3
-0.7664	4.251	0.09484	Cep19
-0.5474	4.556	0.09484	Gpc1
-0.634	3.055	0.09484	Gm12371
2.106	2.447	0.09484	Olfml1
0.9208	4.205	0.09484	Akap12
1.763	6.076	0.09484	Nhsl1
1.422	3.672	0.09484	Ncf2
1.903	3.262	0.09484	Abcc3
0.6217	6.326	0.09484	Snx24
-0.4368	4.222	0.09484	Tars2
1.595	6.627	0.09484	Inpp5d
1.524	4.904	0.09484	Maf
0.4321	5.472	0.09484	Nln
1.274	4.345	0.09484	Cmtm6
0.3767	6.448	0.09484	Pds5a
-1.209	1.817	0.09484	Serpina9
0.414	5.947	0.09484	Slc38a9
0.5037	6.427	0.09484	Cyth1
0.4978	6.458	0.09484	Bcl2
-0.5726	3.644	0.09484	Ssr2
1.416	1.867	0.09484	Igf2bp2
-0.3841	7.946	0.09484	Pja2
1.255	3.428	0.09484	Fgd5
-0.7171	4.224	0.09484	Oaz1
1.52	6.877	0.09484	Il1rapl2
2.664	2.175	0.09484	Gm40645
1.107	4.646	0.09484	Mknk1
-0.813	6.461	0.09484	Septin5
1.572	2.791	0.09484	Ppara
2.247	3.997	0.09484	Tlr7
-0.7164	2.592	0.09484	Trappc2l
0.3442	6.125	0.09484	Btbd7
-0.7084	3.223	0.09484	Rpp14
1.163	4.315	0.09484	ENSMUSG00000120400
-0.4938	8.028	0.09484	Hsp90aa1
1.528	5.744	0.09484	Slco2b1
-0.4258	4.759	0.09484	Isca1
-0.4097	8.555	0.09484	Nell2
1.133	5.145	0.09484	Irak2
-0.5143	6.408	0.09484	Acot7
-0.9705	2.252	0.09484	Cdr1
1.001	5.706	0.09484	Mtus1
1.021	4.251	0.09484	Pald1
0.8868	5.481	0.09484	Denn2b
-0.3689	7.739	0.09484	Akap11
1.339	5.824	0.09484	P3h2
-0.8917	2.975	0.09484	Pcdhgb7
1.251	5.182	0.09499	Gsap
1.532	2.13	0.09499	Syngr2
-0.4198	5.35	0.09499	Epm2aip1
0.6198	4.366	0.09517	Ddr1
0.8928	4.564	0.09517	Heatr5a
2.024	4.471	0.09517	Lef1
0.3384	6.391	0.09517	Stk3
0.361	8.211	0.09517	Clasp2
0.4039	4.755	0.09517	Hdhd5
-0.6406	4.661	0.09527	Gng3
-0.5237	6.298	0.09527	Snap47
0.3154	7.373	0.09527	Dyrk1a
0.3294	6.645	0.09557	Rapgef1
2.091	5.409	0.09567	Agmo
-0.3664	5.288	0.09567	Zmym3
0.5779	8.167	0.09567	Fgf13
0.3824	5.523	0.09567	Suz12
0.423	4.462	0.0958	E130102H24Rik
-0.5325	3.384	0.09589	Ubl4a
-0.5302	9.187	0.09589	Lrfn5
0.6826	3.092	0.09589	Med8
-0.4207	8.789	0.09589	Jarid2
1.557	4.129	0.09589	Wwtr1
-0.5202	8.286	0.09589	Gprasp1
-0.8308	3.187	0.09589	Txnl4a
-0.3387	5.932	0.09589	Cand1
-0.9663	2.116	0.09589	Mrpl36
1.143	2.239	0.09603	Pter
0.8824	3.802	0.09607	Mbd6
0.8659	4.291	0.09652	Pxn
-0.7878	2.593	0.09655	Rex1bd
-0.4379	9.65	0.0966	Ttc3
0.389	6.864	0.0966	Atf7ip
-0.5426	5.465	0.0966	6330403K07Rik
-0.6835	3.778	0.09672	Ss18l2
-0.557	4.38	0.09685	Cdkl1
-0.5201	5.581	0.09685	D430019H16Rik
0.6106	5.986	0.09685	Ldlrad3
-0.7316	4.153	0.09704	Rpl9
0.6849	5.2	0.09704	2700054A10Rik
-0.4104	6.996	0.09705	Pkia
0.401	6.817	0.09705	Slc44a1
0.3294	5.853	0.09705	Prkdc
1.422	3.657	0.09705	Casp8
-0.4724	6.234	0.09705	Sptb
-0.93	3.65	0.09705	Gm5441
1.312	5.58	0.09705	Vsir
-0.8207	3.375	0.09705	Plpp6
0.3587	6.648	0.09709	Kdm2a
-1.04	5.2	0.09709	Ndn
0.9789	3.798	0.09709	Rgs3
-0.7711	7.752	0.09709	Pgm2l1
-0.4187	5.08	0.09709	Oaz2
-0.5958	3.229	0.09709	Rbmxl1
-0.4037	4.652	0.09709	Ppa1
0.4988	4.916	0.09709	Dram2
1.758	3.652	0.09709	Nlrp1b
-0.3518	6.141	0.09709	Dnaja1
2.624	1.054	0.09709	Gm35552
-0.4183	5.821	0.09709	Lrpap1
-0.549	5.674	0.09709	Dbn1
-0.6325	3.868	0.09709	Atp5g1
0.3253	8.91	0.09709	Fgfr2
0.4366	4.612	0.09709	Nup188
-0.5771	6.903	0.09709	Faim2
-0.6707	2.76	0.09709	H2aj
-0.6695	3.571	0.09709	Ormdl3
0.9497	3.324	0.09709	Ifih1
-0.5506	4.799	0.09709	Tbr1
0.8242	2.73	0.09709	Cln3
0.4851	5.806	0.09709	Rsu1
0.7803	7.973	0.09709	Sox2ot
-0.4339	6.198	0.09709	Ldhb
0.4207	4.598	0.09709	Ttll4
-0.4011	9.359	0.09709	Map2
0.6007	3.692	0.09709	Ppp2r1b
1.598	2.335	0.09709	BC034090
-0.787	2.871	0.09709	Gm38250
-0.814	4.221	0.09709	Nrsn2
-0.7592	4.461	0.09709	Necab2
2.604	1.239	0.09709	I830077J02Rik
-0.5858	5.638	0.09717	Sult4a1
0.3161	6.561	0.09717	Cdc37l1
0.503	4.885	0.09717	Hrh1
0.4723	7.85	0.09717	Mgat5
-0.7901	2.785	0.09717	Mrpl12
-0.7344	3.312	0.09717	Eef1e1
0.3606	5.747	0.09717	Tra2b
-0.7745	2.951	0.09717	1700010K23Rik
0.6461	8.995	0.09717	Msi2
0.4673	3.704	0.09717	Amz1
0.3987	6.585	0.09717	Ubr2
-0.6703	4.029	0.09719	Rpl28
0.4104	7.665	0.09745	Esrrg
-0.7259	5.361	0.09759	Cend1
2.603	1.104	0.09759	Fmo1
1.338	2.627	0.09759	D2hgdh
0.452	4.44	0.09776	Glt8d1
-0.8631	7.586	0.09776	Nptxr
0.5293	7.847	0.09776	Prickle1
-0.3308	7.972	0.09781	Aplp2
0.5319	5.713	0.09781	Bicra
-0.8591	3.144	0.09786	Tmem121b
0.3587	6.75	0.09786	Wwc1
-0.4611	6.455	0.09806	Bhlhb9
-0.4387	5.031	0.09807	Hmgn3
-0.5648	4.134	0.09808	Ndufa6
-0.7457	3.581	0.09808	Praf2
0.504	5.837	0.09808	Ptpn1
-0.54	6.713	0.09808	Atl1
0.7244	4.625	0.09808	Smad7
-0.7149	2.762	0.09808	Morn2
0.4589	6.392	0.09808	Grk3
-0.5261	4.342	0.09808	Nap1l3
-0.3376	7.86	0.09808	Ywhae
-0.7409	3.014	0.09808	Tmem25
0.3837	7.079	0.09808	Trak1
1.171	4.048	0.09808	Phkg1
0.3209	7.632	0.09808	Ank
0.5915	6.359	0.09808	Igsf21
0.3575	6.845	0.09808	Phc2
1.411	3.53	0.09808	Ostf1
-0.5402	6.836	0.09817	Gabra1
0.4973	5.168	0.09817	Arfip1
-0.3812	6.475	0.09817	Ppm1a
-0.4476	5.011	0.09817	Sms
-0.7705	3.742	0.09818	Sowaha
0.8174	2.912	0.09825	Slc13a5
-0.9233	2.457	0.09825	Gm1715
1.061	4.87	0.09825	St3gal4
-0.5822	4.18	0.09825	Slc6a8
-0.519	3.835	0.09827	Kars
0.633	3.502	0.09827	BC065397
-0.7424	3.365	0.09827	Ndufs8
-0.4423	4.996	0.09827	Hnrnph2
-1.317	1.918	0.0983	Rnf113a2
1.868	5.477	0.09841	Ptprc
0.6677	3.575	0.09841	Chd1l
-0.4363	5.232	0.09841	Klhl22
2.219	3.066	0.09841	Parp14
-0.6676	3.382	0.09841	Pim2
-0.86	2.853	0.09841	A230004M16Rik
-0.6516	3.632	0.09841	Kcnh2
1.391	5.341	0.09841	Notch2
0.4123	5.92	0.09854	Efhd2
1.195	1.901	0.09856	Tnfsfm13
2.046	4.113	0.09856	Col27a1
0.8332	3.18	0.09858	Dtwd2
-0.3743	5.478	0.09858	Ccdc149
-0.6623	6.691	0.09858	ENSMUSG00000121179
-0.452	4.122	0.09858	Apmap
1.149	6.664	0.09858	Abca1
1.767	3.568	0.09858	Nfam1
-0.3463	5.668	0.09871	Smarcd1
-0.6728	7.093	0.09871	Rtl4
1.028	2.97	0.09871	Mri1
1.139	3.918	0.09871	P2rx4
1.506	4.645	0.09871	Nckap1l
-0.5682	5.176	0.0988	Rpl21
-0.4314	5.305	0.09917	Clcn6
1.335	5.402	0.09917	Itgam
-0.3833	4.385	0.09942	Bap1
-0.6026	3.724	0.09942	H2az1
-1.295	4.204	0.09994	Kit
2.94	1.527	0.09994	Trp53cor1
-0.9708	4.654	0.09994	Mt3
-0.5684	4.072	0.09994	Ufm1
-0.3599	5.664	0.09994	Rbbp7
0.8155	2.922	0.09994	Kmt5c
0.4238	6.491	0.09994	Ppp2r3a
-0.6358	3.729	0.09994	Diras1
-0.362	6.46	0.09994	Rad23b
-0.4608	4.656	0.09994	Omg
-0.424	4.693	0.09994	Nolc1
2.726	4.115	0.09994	H2-D1
-0.5185	3.876	0.09994	Tbcb
1.389	6.186	0.09994	Itgb5
0.7143	3.74	0.09994	Nfya
-1.144	4.297	0.09994	Mme
0.8173	4.451	0.09994	Prdm5
-0.6166	4.557	0.09994	Rpl19
1.001	4.971	0.09994	Slc2a1
0.6512	5.428	0.09994	Zfp516
0.5009	4.977	0.1	Ift140
1.376	1.765	0.1	Pola2
1.501	2.017	0.1005	Rtkn2
1.647	2.523	0.1009	Gbp7
1.533	1.841	0.1015	Rnf135
0.706	4.461	0.1015	Bach1
-0.5132	4.211	0.1015	Emc4
-0.5692	3.63	0.1015	Yeats4
-0.6935	2.559	0.1015	Zfp428
-0.8802	2.37	0.1015	Btbd6
-0.7517	3.859	0.1016	Grcc10
0.5274	4.194	0.1016	Gca
1.605	2.546	0.1016	Itgb3
3.314	4.041	0.1016	Mag
-0.417	6.248	0.1016	Btbd3
1.505	4.91	0.1016	Pik3ap1
-0.6954	3.567	0.1016	Bbln
-0.6416	2.854	0.1016	Acot8
-0.5803	4.187	0.1016	Ap2s1
-0.816	6.715	0.1016	Sv2c
0.4723	6.443	0.1016	Acer3
-0.88	2.012	0.1016	Nhlrc1
-0.7588	2.865	0.1016	Znhit3
0.6576	5.997	0.1016	Rab8b
1.07	3.943	0.1017	Lmo2
-0.7153	6.237	0.1018	Jcad
-0.6118	3.967	0.102	Rpl12
1.022	3.639	0.102	Gm20605
-0.3666	6.251	0.1021	Ubqln1
-1.13	2.664	0.1021	Gm15810
1.058	2.631	0.1021	Gm49417
-0.6224	3.36	0.1021	Dhrs1
0.8707	3.423	0.1021	Zyx
0.5087	5.407	0.1021	Gtf2h2
1.263	5.416	0.1021	Selplg
0.9328	5.245	0.1021	Rcbtb2
-0.5179	4.21	0.1021	Ndufa5
-0.5597	3.763	0.1021	Gm48747
-0.3628	5.142	0.1021	Gsk3a
1.266	4.684	0.1021	Anxa3
1.512	5.338	0.1021	Cfh
1.823	1.951	0.1021	Efhd1
-0.3949	6.488	0.1021	Fkbp1a
1.363	5.161	0.1022	Msn
0.3661	7.362	0.1022	Nr3c1
-0.9249	1.997	0.1022	Hddc3
0.38	8.222	0.1022	Ssh2
1.218	4.324	0.1022	8030442B05Rik
2.117	2.55	0.1022	Plekhg3
0.8334	5.562	0.1022	Abcc4
1.664	3.499	0.1022	P2ry6
-0.6576	3.487	0.1022	Haghl
0.5196	5.286	0.1022	Wsb1
-0.6473	2.845	0.1022	Phlda1
1.382	4.55	0.1022	Rcsd1
0.9081	4.567	0.1022	Tnfrsf11a
0.6915	4.675	0.1022	Tmem104
0.9816	3.272	0.1022	Pld2
-0.4397	4.309	0.1023	Lyrm9
-0.3382	5.426	0.1026	Nus1
-1.013	2.399	0.1026	Gxylt2
-0.4143	5.275	0.1026	Wbp4
0.3484	7.949	0.1026	Cyrib
-0.4161	4.966	0.1026	Vps29
0.5969	5.844	0.1026	Lgr4
0.8942	3.275	0.1026	Rbms2
0.8454	5.968	0.1026	Nek7
0.3312	7.167	0.1028	Cdkal1
1.076	8.813	0.1028	Plxdc2
-0.3323	5.437	0.1028	Psmb1
0.5265	6.523	0.1028	Supt3
-0.8121	2.454	0.103	Spr
-0.4629	6.635	0.103	Phyhip
-1.034	4.445	0.103	Sfmbt2
0.666	4.978	0.103	Mideas
-0.4117	5.106	0.103	Slc25a5
0.7863	2.735	0.103	Slc25a20
-0.5613	3.725	0.103	B4galt2
-0.4568	4.523	0.103	Spryd7
-0.6965	5.789	0.1031	Cbarp
-0.394	4.874	0.1031	Mzt1
-0.7752	4.885	0.1031	Grem2
-0.3248	7.002	0.1032	Serbp1
-0.8439	4.257	0.1032	Cyp4x1
0.3866	8.14	0.1032	Diaph2
-0.4661	9.061	0.1032	Cnksr2
-0.4722	6.547	0.1032	Septin3
0.3062	6.81	0.1033	Adam10
1.653	4.055	0.1034	Ucp2
-0.7699	2.247	0.1034	Tagap1
0.4764	4.934	0.1034	Mob2
0.4105	7.308	0.1034	Asph
-0.6164	3.358	0.1035	1700037H04Rik
1.184	2.642	0.1035	Lmbr1l
-0.495	4.939	0.1035	Lancl2
1.671	3.955	0.1035	Nfe2l2
0.3933	5.547	0.1035	Nsmaf
0.5129	5.099	0.1035	Mroh1
1.387	3.07	0.1035	Arhgap27
-0.4774	7.38	0.1035	Prepl
-0.5308	4.563	0.1035	Lgalsl
-0.6691	2.971	0.1035	4833422C13Rik
1.38	2.819	0.1035	Stk17b
1.768	4.378	0.1035	Cd180
-0.4618	8.202	0.1035	Galnt13
1.559	4.547	0.1035	Gm10790
-0.407	4.999	0.1035	AW822252 - ENSMUSG00000121458
0.5997	4.888	0.1035	Arhgef1
-0.4549	9.498	0.1035	Celf4
-0.6151	2.803	0.1035	Mrps26
2.128	2.664	0.1035	Ugt1a6a
-0.4677	4.948	0.1035	Swi5
-0.4195	4.614	0.1035	Ranbp1
-0.4212	4.673	0.1035	Chmp1b2
-0.3225	6.375	0.1035	Arf1
1.04	4.057	0.1035	Oma1
0.6791	5.228	0.1035	Sulf2
-0.6056	3.083	0.1035	4632404H12Rik
-0.5211	4.153	0.1035	Phax
1.13	4.637	0.1035	Rnase4
-0.5104	4.402	0.1035	Aldh3a2
1.519	3.1	0.1035	Akna
-0.4708	6.164	0.1035	Apbb1
-0.2969	6.847	0.1035	Hmgb1
-0.4613	7.214	0.1035	Kpna1
-0.5146	5.544	0.1035	Necap1
0.4229	7.043	0.1035	Hdac4
3.352	2.95	0.1035	Aspa
0.5303	6.429	0.1035	Rnf13
-0.5128	5.049	0.1035	Rps8
0.8418	5.438	0.1035	Cntn2
-0.51	4.612	0.1035	Sod1
0.4136	6.025	0.1035	Usp25
-0.5161	6.103	0.1035	Pdha1
0.9585	6.18	0.1035	Skap2
1.179	4.061	0.1035	Baz1a
-0.394	4.427	0.1036	P4htm
-0.4234	4.436	0.1036	Ccar2
-1.191	1.678	0.1037	Brf2
-0.3955	5.577	0.1038	Pdap1
-0.6546	5.169	0.1038	Syt5
-0.3885	7.741	0.1038	Ppp3r1
1.245	3.766	0.1042	Hck
-0.814	2.745	0.1042	Impdh2
-0.6032	5.096	0.1042	Caly
-0.421	5.127	0.1042	Vps26b
-0.7421	2.735	0.1042	Zfp133-ps
-0.4688	3.899	0.1042	Bcl2l2
-0.9086	3.049	0.1042	Gm28376
0.7231	4.587	0.1042	Smox
0.4276	5.56	0.1042	Mtmr2
-0.5164	6.88	0.1042	Tomm70a
0.4545	4.491	0.1042	Ccdc191
1.284	3.147	0.1042	Stat6
-0.6665	3.191	0.1044	Tceal1
0.981	2.575	0.1044	Col6a3
-0.7104	2.928	0.1047	Mrpl28
0.722	5.208	0.1048	Slc27a1
1.515	4.102	0.1049	Tfeb
-0.3628	5.862	0.1049	Atp6ap1
0.6975	3.298	0.1049	Myo1c
-0.5425	7.808	0.1049	Ywhag
1.27	7.27	0.1049	Ctsd
0.5666	7.153	0.1049	Abhd12
-0.3831	7.116	0.1051	Sesn3
-0.6805	3.713	0.1051	Rrp12
-0.6064	4.323	0.1051	Armcx4
-0.4365	6.618	0.1051	Nopchap1
0.335	6.424	0.1051	Nbeal1
-0.3611	5.233	0.1052	Tagln3
-0.8111	2.063	0.1053	Abt1
-0.8119	3.626	0.1057	Rpl22l1
1.477	2.301	0.1059	Ccdc61
-0.4115	4.299	0.1059	Tmco1
-0.3191	7.407	0.1059	Mprip
1.726	2.884	0.1059	Trim56
0.4883	4.361	0.1066	Tmem165
0.288	7.599	0.1067	Rbm25
1.248	4.094	0.1067	P2rx7
0.4756	7.314	0.1068	Tmtc2
0.7057	4.008	0.1068	Mcm9
-0.4213	5.513	0.1068	Usp5
-0.5316	5.682	0.107	Tbc1d9b
-1.012	5.51	0.107	Vgf
0.335	5.955	0.107	Bckdhb
-0.4832	5.243	0.107	Brdt
-0.2809	5.656	0.107	Cct6a
-0.4343	4.143	0.1071	Ube2m
2.217	2.312	0.1071	Fam114a1
1.985	4.321	0.1071	Lcp2
2.446	4.148	0.1071	Ptgds
-0.31	5.499	0.1071	Mtrex
0.573	3.983	0.1074	Zfpm1
-0.4742	4.504	0.1074	Fam8a1
-0.3035	7.028	0.1074	Megf9
0.8635	4.662	0.1074	Klf3
0.3875	5.213	0.1077	Slx4ip
0.4569	7.953	0.1077	Cux1
-0.6312	9.028	0.1078	Gm15564
1.596	3.087	0.1079	Sipa1
-0.2849	6.627	0.1079	Sec62
1.122	4.33	0.1079	Ttyh2
0.7889	7.168	0.1082	Pde3b
1.944	3.39	0.1084	Epsti1
-0.4063	6.003	0.1084	Ap3b2
-1.089	4.714	0.1084	Trpc3
0.8172	2.723	0.1084	Nabp1
1.091	3.058	0.1085	Zfp839
-0.2973	5.616	0.1086	Fem1b
0.8131	3.399	0.1086	Trpm4
1.542	1.987	0.1086	Dnah14
-0.5861	4.336	0.1086	Chmp2a
0.4224	4.519	0.1086	Golga5
1.174	5.644	0.1086	Stard13
-0.5835	3.8	0.1086	Nme2
-0.6644	3.996	0.1087	Chst15
-1.034	2.098	0.1088	A330032B11Rik
-0.578	8.871	0.109	Atp1a3
0.88	3.435	0.109	Nfkbia
1.389	1.933	0.109	Flvcr2
-0.4477	6.913	0.109	Hsph1
-0.5419	3.774	0.109	Rnf126
-0.5989	3.88	0.109	Ddx25
-0.7616	4.746	0.109	Chchd10
-0.8085	2.963	0.109	Romo1
0.4775	4.496	0.109	Hbp1
0.3495	5.692	0.109	Rab40c
0.6521	5.786	0.109	Zhx2
1.777	2.615	0.109	Lpxn
-0.4255	7.504	0.109	Tcaf1
-0.4903	6.625	0.109	Svop
-0.8403	2.235	0.109	Dnajc30
0.7209	3.006	0.109	Dusp12
0.663	5.418	0.109	Itprid2
3.32	3.454	0.109	Cldn11
2.471	3.761	0.109	Eya4
0.4014	5.459	0.109	Capza1
-0.4146	6.997	0.1091	Agap2
-0.6145	3.116	0.1091	Slc35b1
3.142	1.453	0.1091	Gm19500
-0.6239	3.444	0.1091	Med28
-0.5946	4.669	0.1091	Rpl41
-0.5048	4.98	0.1093	Spink10
0.3641	5.096	0.1093	Atr
-1.08	2.31	0.1093	Prdm8
0.9982	1.855	0.1093	Lsr
0.8305	3.444	0.1095	Gm49539
-0.3753	5.024	0.1096	Cdc37
1.411	6.04	0.1099	Apbb1ip
1.481	3.106	0.11	Parvg
1.596	2.217	0.11	Hk3
1.786	3.854	0.11	Prkcd
-0.4398	5.696	0.11	Slc2a3
-0.3807	9.111	0.11	Mir6236
0.9708	2.659	0.11	4930522L14Rik
-0.4647	4.76	0.11	Sgsm3
0.4212	4.47	0.11	Eif2b3
0.7458	2.634	0.11	Traf2
-0.4998	6.243	0.11	Uhmk1
1.519	4.979	0.11	Gli2
0.632	4.546	0.1103	Smad5
-0.4445	6.4	0.1104	Kif3a
2.251	2.476	0.1105	Hcls1
-0.6256	3.73	0.1106	Uqcrfs1
0.533	6.603	0.1106	Lims1
1.273	3.528	0.1106	Celrr
0.5036	5.386	0.1106	Kcna6
0.5975	5.213	0.1106	Gtf2f2
-0.6853	2.67	0.1106	Fam136a
1.853	2.153	0.1106	Cebpa
0.931	4.098	0.1107	Usp35
-0.3306	5.44	0.1108	Trim23
0.4691	8.143	0.1109	Sik3
-0.4946	4.383	0.1111	Prdx5
-0.3758	6.363	0.1112	Eif5
-0.4496	7.349	0.1112	Eif4a2
1.715	3.932	0.1112	Syk
1.466	2.902	0.1112	Plod2
1.628	3.617	0.1112	Gpr37
-0.543	6.907	0.1112	Clstn3
1.857	3.654	0.1115	Fgd2
0.8823	4.234	0.1115	Prcp
0.6238	3.643	0.1115	Ripk1
-0.5273	3.562	0.1118	Zfp770
0.687	3.105	0.1118	Ccdc28b
-0.4506	11.28	0.1118	Nlgn1
-0.3807	8.039	0.1118	Gabra2
-0.4586	3.802	0.1119	Smpd1
0.3998	5.512	0.1121	Aatf
0.4785	4.947	0.1121	Zfyve26
0.5714	4.477	0.1122	Plgrkt
-0.3548	7.732	0.1122	Cyria
0.76	3.382	0.1122	Khnyn
-0.4839	7.769	0.1122	Zwint
-0.6244	4.07	0.1123	Ndufb8
-0.6857	5.034	0.1123	Gabrg1
-0.6855	4.792	0.1125	Mpp3
-0.5383	4.338	0.1125	Coq9
-0.4462	5.203	0.1125	Ttbk2
-0.5039	3.363	0.1125	Rnf181
0.4844	4.924	0.1127	Gabpb2
-0.7668	5.863	0.1127	Hap1
1.195	5.384	0.1127	Tbxas1
2.491	2.291	0.1127	Dach2
-0.647	3.5	0.1127	Scrt1
-0.6032	4.525	0.1127	Tuba1b
1.504	2.015	0.1127	Gm37168
1.827	3.556	0.1127	Ggta1
-0.6152	5.023	0.1127	Plch2
0.324	6.68	0.1127	Cert1
0.515	7.626	0.1129	Ptn
-0.7203	3.765	0.1129	Rcn1
-1.27	1.734	0.1129	Fbll1
-0.3688	4.399	0.1131	Pygo1
1.429	2.755	0.1132	Rubcnl
-0.6072	3.25	0.1134	Surf1
-0.3617	4.957	0.1139	Gosr1
1.545	5.527	0.1139	Ccnd3
-0.4468	6.169	0.1139	Ppp2r1a
-0.7339	5.619	0.1139	Strip2
-0.3805	5.311	0.1141	Ramp1
-0.385	7.425	0.1141	Prkar1a
0.9144	2.567	0.1141	Slc31a2
-0.3707	6.437	0.1141	Atp2b3
0.68	3.757	0.1141	Tesk2
1.573	4.04	0.1142	Capn3
1.429	2.123	0.1142	Gm38071
-1.188	1.954	0.1142	ENSMUSG00000121193
0.4913	4.251	0.1142	Fbxo7
-0.3428	6.93	0.1142	Atp5a1
2.817	1.939	0.1142	Pdzph1
-0.5001	5.001	0.1142	Foxg1
1.3	6.993	0.1142	Cx3cr1
-0.4312	6.704	0.1142	Gnl3l
0.5169	5.865	0.1142	Wdfy2
-0.6273	4.083	0.1142	Ndufa13
1.458	2.405	0.1144	Eps8l1
0.7541	4.695	0.1146	Hps3
-0.6498	3.459	0.1148	Tm2d2
-0.4114	7.328	0.1148	Gm38393
-0.5327	4.896	0.1148	Sorbs2os
2.987	5.146	0.1151	Prr5l
0.3918	5.542	0.1151	Cdyl
-0.6078	11.56	0.1151	Gphn
1.191	5.476	0.1151	Svil
-0.5684	3.879	0.1151	Hsdl1
-1.029	6.638	0.1151	Penk
-0.7201	3.084	0.1151	Rpl36
1.435	4.196	0.1153	Rgma
2.203	3.14	0.1154	Pld4
0.8128	6.42	0.1154	Chd7
-0.3307	7.052	0.1154	Psip1
-0.4942	5.317	0.1156	Vti1b
1.508	2.818	0.1158	Cpm
1.956	3.81	0.1159	Arhgap45
-0.5648	9.656	0.1159	Map1b
-0.9129	2.624	0.1159	Rpusd1
1.378	2.577	0.1159	Bcl2l11
1.473	5.923	0.1159	Laptm5
-0.5869	3.583	0.1159	Zbtb49
-0.3495	4.933	0.1159	Ppid
0.821	3.185	0.1159	Mdm1
-0.747	2.309	0.1159	Tmem160
0.9223	3.277	0.1159	Myh14
-0.8376	2.726	0.116	Zbbx
1.843	3.13	0.116	Gm21984
-0.5105	4.813	0.116	Slc25a22
-0.335	5.309	0.116	Arpc1a
-0.4128	4.812	0.116	Psma1
-0.8823	2.242	0.116	Gm14372
-0.4267	7.04	0.116	5330434G04Rik
1.004	5.401	0.1163	Tln1
0.4199	4.507	0.1163	Tet1
-0.3282	8.041	0.1164	Matr3
0.8368	4.984	0.1165	Whrn
-0.5795	4.618	0.1166	C1qtnf4
0.7307	5.915	0.1168	Wasf2
-0.595	3.496	0.1169	Polr2g
0.2696	7.896	0.1169	Bcas3
0.8278	4.917	0.117	Trp53bp2
-0.6584	5.25	0.117	Slc6a15
-0.9645	1.863	0.117	Arxes1
-0.6517	4.419	0.1171	Rasl10b
1.356	2.605	0.1176	A530072M11Rik
-0.4821	7.642	0.1176	Rasgrp1
-0.3503	6.054	0.1177	Fyttd1
-0.5664	4.751	0.1177	Sprn
-0.406	8.017	0.1177	Arhgef9
1.423	4.38	0.1177	Vav1
1.279	2.705	0.1177	Frmd8
0.5769	4.67	0.1177	Gatad2a
0.5977	7.667	0.1177	Fhit
0.9302	4.142	0.1177	Krcc1
0.8117	3.228	0.1179	Arid3a
-0.4947	6.082	0.1179	Jph4
0.6033	3.662	0.1179	Lbr
-1.227	3.257	0.1179	Nr2f2
0.6997	3.38	0.118	Nudt13
0.8187	4.173	0.1181	Cd34
0.7851	5.481	0.1181	Gna13
0.3046	6.393	0.1181	Arnt
2.691	3.1	0.1181	Mog
0.7695	7.881	0.1181	Tmcc3
-0.9149	4.872	0.1183	Dchs2
0.4852	4.954	0.1183	Nfic
0.4209	4.254	0.1183	Pofut1
0.3995	5.442	0.1183	Zfx
-0.3529	6.441	0.1183	Dcun1d4
-0.3324	6.747	0.1183	Nucks1
-0.5118	4.399	0.1183	Entpd6
-0.7392	2.849	0.1184	Spata2l
-0.4307	6.636	0.1189	Sacs
1.263	5.109	0.1189	Gatm
0.5969	6.209	0.1189	Rap1a
1.202	3.954	0.1189	Zfp36l1
-0.6457	3.956	0.119	Drc1
0.5241	4.492	0.119	Taf1d
-0.7419	3.24	0.119	Ankrd63
0.3889	7.376	0.119	Psme4
1.362	5.034	0.119	Megf10
-0.6581	3.385	0.119	Ndufa3
1.124	5.396	0.119	St3gal6
1.874	2.435	0.119	Ranbp3l
-0.3009	6.824	0.119	Zfp106
0.6584	4.71	0.119	Plekhh2
0.3885	6.894	0.1195	Nfix
1.092	4.942	0.1195	Ifitm10
0.8944	5.515	0.1196	Adipor2
-0.4634	4.275	0.1197	Txn2
-0.7368	3.861	0.1197	Tspyl5
-0.4262	4.545	0.1197	Zfp251
1.7	4.317	0.1198	Abi3
0.9859	2.788	0.12	Wrap53
-0.4967	6.409	0.1202	Ccdc148
0.4929	5.142	0.1202	Swt1
0.5206	5.847	0.1202	5031439G07Rik
-0.6256	3.918	0.1203	Prps1
-0.4988	4.769	0.1204	Ogdhl
1.728	5.382	0.1204	C1qb
-0.6887	2.664	0.1204	Zfp931
1.497	3.328	0.1204	Cd82
1.852	4.756	0.1204	Mecom
0.5606	4.788	0.1204	Sft2d1
1.132	4.431	0.1204	Gramd3
-0.7619	2.066	0.1205	1700034H15Rik
-0.5473	3.999	0.1205	L2hgdh
-0.5464	6.237	0.1205	Rangap1
-0.5524	2.818	0.1206	Bet1l
-0.3815	5.114	0.1207	Spryd3
1.028	4.08	0.1207	Rps6ka1
-0.33	5.466	0.1207	Ssx2ip
0.2929	5.667	0.1207	Fkbp15
0.6625	5.245	0.1207	Rcbtb1
-0.8134	1.903	0.1207	Avpi1
-0.855	2.313	0.1207	Hyls1
0.9296	3.3	0.1207	Calcrl
1.465	3.372	0.1207	Adcy7
-0.4354	4.662	0.1209	Oscp1
-0.4361	4.247	0.121	Park7
-0.5115	4.532	0.121	Zfp821
-0.4226	7.092	0.121	Sptbn2
0.3533	7.287	0.121	Snd1
-0.4835	5.645	0.121	Gdap1
1.064	5.837	0.121	Appl2
0.7163	4.287	0.1214	Acox3
-0.5137	6.477	0.1214	Maged1
1.715	3.623	0.1214	Gsn
1.014	2.829	0.1214	Ercc2
0.3382	8.084	0.1214	Farp1
-0.5612	3.395	0.1214	Mrpl21
-0.4779	6.722	0.1214	Syndig1
-0.5148	3.282	0.1214	Grpel1
0.5779	4.035	0.1214	Sbno2
1.463	4.498	0.1214	Rfx4
2.136	2.613	0.1215	Nkx2-2os
0.5742	3.718	0.1215	Tcf3
1.411	1.548	0.1217	Mks1
0.8068	3.629	0.1217	Ptbp1
-0.4921	5.859	0.1218	Tsnax
1.455	5.6	0.1218	Siglech
-0.4886	5.123	0.1218	Dcp2
-0.3118	6.736	0.1218	Ap2a2
0.6083	5.546	0.1218	Mthfs
0.513	7.917	0.1218	Cdh10
-0.5578	5.017	0.1218	Nap1l2
0.3641	9.999	0.1218	Nav2
0.7727	3.453	0.1218	Apool
0.7098	3.423	0.1218	Kif6
0.511	5.108	0.1219	Mad1l1
-0.4227	4.609	0.122	Ndufv1
0.4319	5.971	0.1222	Dip2a
-0.5569	4.824	0.1223	Nol6
0.5632	5.319	0.1223	Kat2b
-0.3668	5.323	0.1225	Cstf2
-0.5104	5.879	0.1225	Efnb2
-0.3332	6.675	0.1226	Mapre3
-0.5734	4.267	0.1227	Tpd52l1
-0.7548	3.661	0.1227	Rps21
1.957	2.563	0.1227	Il21r
1.038	2.77	0.1229	Sh2d3c
-0.5897	4.319	0.1232	Rps27a
-0.6601	7.474	0.1233	Gnal
0.5043	4.699	0.1233	Mxd4
-0.7626	2.976	0.1233	Plaat1
2.151	3.864	0.1233	Dnah11
0.2869	7.175	0.1233	Tbl1x
0.4942	3.668	0.1233	Ctc1
0.2729	6.924	0.1233	Vps41
3.141	2.94	0.1233	Tnfaip6
0.5307	6.472	0.1233	Myh9
0.2868	8.009	0.1233	Zcchc7
-0.8298	2.125	0.1233	Gpr75
1.581	4.139	0.1233	Irf8
1.845	3.224	0.1233	Mafb
0.8133	4.685	0.1233	Vrk2
-1.011	2.456	0.1233	Gpr12
-0.7206	4.457	0.1233	Vstm2l
-0.4003	6.621	0.1234	Madd
0.3172	6.005	0.1234	Gpatch2
0.4413	5.881	0.1235	Crtc3
-0.3096	5.939	0.1235	Cfap36
1.362	7.092	0.1235	Ctss
-0.6614	2.522	0.1235	Ddx51
0.6422	5.11	0.1238	Dpf3
-0.6338	2.947	0.124	Rdh14
-0.3575	6.942	0.124	Hspa12a
0.5137	6.087	0.124	Fggy
0.636	5.421	0.124	Tbc1d16
-0.5214	5.714	0.124	Ptprf
-1.084	1.87	0.1242	Dhrs13
-0.7481	2.236	0.1242	Gm1992
-0.5439	4.234	0.1245	Rpl7
1.874	3.058	0.1245	Arhgap30
-0.5647	3.158	0.1245	Rsl24d1
0.6283	3.557	0.1245	Gm2415
0.5612	4.443	0.1248	Gm13483
-0.8626	4.715	0.1249	Ly6h
-0.6247	6.33	0.125	Tmem130
0.287	7.555	0.125	Tnrc6a
0.9314	2.787	0.125	Gm37534
1.663	1.863	0.1251	Pigv
-0.4027	6.426	0.1252	Prkar2b
-0.3553	4.355	0.1252	Nt5m
-0.3895	5.42	0.1252	Actr1b
-0.3816	5.231	0.1252	Pcbp1
-0.8265	6.369	0.1253	Stum
-0.4164	4.128	0.1253	Ubox5
0.3029	7.88	0.1253	Kansl1
0.492	5.728	0.1253	Pkn1
0.5501	6.519	0.1253	Pvt1
-0.6514	3.546	0.1254	Tomm6
0.943	2.587	0.1254	Mtfr1
-0.6932	3.924	0.1256	4930598N05Rik
-0.5448	5.231	0.1256	Far2
0.7458	4.992	0.1256	Abcd2
-0.8267	7.497	0.1256	Usp29
-0.5395	5.873	0.1256	Tubb5
1.995	1.654	0.1256	Adam33
1.348	4.275	0.1257	Aim2
0.3627	5.359	0.1257	Trim24
0.295	7.115	0.1258	Smap2
-0.4596	7.499	0.1263	Aplp1
-0.5484	3.092	0.1263	Mrpl17
-0.2696	7.581	0.1268	Eif4g2
1.944	3.923	0.1268	Plekhh1
-0.75	2.51	0.1268	Efcc1
1.417	2.861	0.1269	Il10rb
0.3896	7.658	0.1271	Fmnl2
0.7674	4.512	0.1274	Polk
0.5267	7.53	0.1274	Fnbp1
-0.4766	5.67	0.1276	Chst1
-0.7686	6.914	0.1276	Gap43
-0.8021	3.261	0.1276	Rpl35
1.479	3.307	0.1276	Spi1
0.6131	3.617	0.1277	Vps37c
1.457	3.998	0.1277	Slc7a10
-0.6137	4.04	0.1279	Fxyd7
1.17	3.956	0.1279	Psat1
-0.5237	6.964	0.1279	Map7d2
-0.7	2.756	0.1279	Mrps34
2.486	2.913	0.1279	Apobec1
1.631	1.623	0.128	Ttc41
0.78	4.729	0.128	Golim4
1.215	4.907	0.128	Rai14
0.6444	6.452	0.128	2610035D17Rik
-0.5105	6.403	0.1281	Prkcg
0.9541	1.612	0.1282	9330151L19Rik
-0.599	3.911	0.1282	Fjx1
-0.3645	5.089	0.1282	Htatsf1
-0.2724	6.087	0.1284	Ipo7
-0.6819	2.962	0.1285	Gstp1
0.6602	6.706	0.1285	Runx2
0.6092	3.422	0.1285	Lrrc75a
-0.4242	5.463	0.1285	A230103L15Rik
0.6702	4.46	0.1285	Csad
1.473	3.413	0.1285	Rab3il1
-0.9862	2.636	0.1285	B230206L02Rik
-0.3867	5.618	0.1285	Lancl1
-0.3062	4.985	0.1285	Arl1
1.238	3.909	0.1285	Nkain1
0.781	4.271	0.1289	Manba
1.828	3.299	0.1289	Itgb2
2.136	4.138	0.1289	Ermn
-0.654	2.475	0.1293	Smim8
-0.5025	3.625	0.1293	Bloc1s6
0.2801	6.574	0.1293	Phc3
0.3799	5.528	0.1293	Txndc11
0.3361	6.384	0.1293	Zfp652
-0.8753	3.713	0.1294	Tmem158
0.2816	5.999	0.1295	Pde7a
1.898	1.896	0.1297	Ugt1a8
-0.4656	6.066	0.1298	Slc25a23
0.703	2.689	0.1298	Rbl1
1.327	4.788	0.1303	Hmcn1
-0.5639	2.834	0.1306	Zfp72
0.9768	3.487	0.1307	Spidr
1.502	3.113	0.1307	Zfp984
0.5253	4.467	0.131	Slc36a1
0.4956	4.53	0.131	Rad50
0.8801	7.45	0.1311	Pag1
-0.3372	9.182	0.1314	Rims2
1.097	2.358	0.1316	Gbp9
-0.6229	4.675	0.1316	Nrg3os
-0.6031	3.499	0.1316	Hfm1
0.7323	3.743	0.1316	Zfp976
-0.7119	2.48	0.1316	Tmsb15l
1.293	5.02	0.1316	Plcg2
-0.6957	3.695	0.1316	Rab9b
-0.639	4.418	0.1316	Insyn1
0.4145	4.519	0.1316	Mtx3
1.814	3.365	0.1317	Pik3cg
1.444	3.646	0.1317	Hk2
-0.4953	5.404	0.1317	Lzts3
-0.6539	2.956	0.1318	4930532I03Rik
-0.3584	4.829	0.1318	Med24
-0.5472	7.999	0.1318	Vsnl1
-0.5958	3.971	0.1319	Nkrf
0.5204	5.472	0.132	Stat3
-0.3578	5.579	0.132	Srp72
-1.486	2.078	0.1321	Gm12068
0.3467	7.34	0.1321	Itsn2
-0.4019	6.036	0.1321	Napg
1.37	4.4	0.1321	Il10ra
0.4397	4.982	0.1321	Ttc7
-0.4801	4.926	0.1321	Wnk3
-0.7077	3.204	0.1321	Gm43597
-0.548	3.028	0.1321	Ndufaf1
0.4221	6.306	0.1321	Tsc22d2
0.7562	4.974	0.1321	Clic4
-1.004	1.75	0.1321	Flywch2
0.4782	5.25	0.1321	Wbp1l
0.461	6.795	0.1321	Sik2
0.6145	2.858	0.1321	Zc3h8
-0.5871	3.566	0.1321	Tmem35a
-0.4164	7.824	0.1321	Gm45837
-0.315	5.677	0.1322	Stam
0.4483	6.384	0.1323	Lamp2
-0.4296	6.559	0.1326	Arpp19
-0.5188	3.813	0.1326	Hirip3
2.653	2.769	0.1328	Myrf
1.234	3.395	0.1332	Phgdh
1.263	2.159	0.1332	Renbp
1.096	3.095	0.1332	Pon2
1.473	3.614	0.1332	Txnip
-0.3911	6.802	0.1333	Celsr2
-0.364	7.846	0.1337	Tmod2
1.034	3.136	0.1338	Unc5b
-0.2825	8.027	0.1341	Kidins220
-1.083	2.16	0.1343	H4c4
-0.6357	2.67	0.1343	Med10
0.9328	3.155	0.1345	Abca7
1.495	3.542	0.1346	Nrros
1.131	5.246	0.1347	Egfr
-0.3418	5.412	0.1347	Crbn
0.3648	5.969	0.1347	Traf3
0.4654	4.159	0.1351	Pms1
0.4066	8.374	0.1351	Mef2a
0.2528	6.441	0.1351	Arid4a
-0.5452	8.115	0.1353	B230303A05Rik
-0.5623	3.773	0.1355	Snrpd1
-0.3479	6.499	0.1355	Actn1
-0.4499	5.829	0.1355	Lhfpl4
-0.5189	5.248	0.1359	Slc4a3
-0.2369	7.035	0.136	Oga
0.3761	5.025	0.1361	Pcnt
-0.6833	4.198	0.1362	Rpl37
-0.4395	4.959	0.1363	Psmc3
-0.6061	2.85	0.1364	Tmem14c
-0.5543	3.234	0.1368	Dynlt2b
2.032	2.953	0.137	Slc7a7
1.27	1.698	0.1373	Srd5a1
-0.7446	5.862	0.1373	Rgs4
0.721	2.943	0.1374	Hemk1
-0.5302	4.404	0.1375	Aimp1
-0.507	3.887	0.1376	Ift22
-0.5906	5.819	0.1376	Egr1
-0.7261	2.598	0.1377	9530051G07Rik
-0.3254	4.596	0.1377	Ergic3
-0.505	5.254	0.1377	Ypel5
-0.6342	2.934	0.1377	Rtl5
0.4998	6.667	0.1377	Lpp
-0.6257	3.151	0.1377	A530058N18Rik - ENSMUSG00000087694
-0.3345	6.458	0.1378	Pcmt1
-0.3948	6.61	0.1379	Atp6v1e1
-0.4098	6.021	0.138	Gnb5
1.165	4.448	0.138	Ets1
-0.3414	4.392	0.138	Cnih1
-0.7287	2.242	0.138	Magohb
-0.416	5.512	0.1381	Ppm1k
-0.7435	2.315	0.1381	Hsd17b10
-0.8874	5.458	0.1381	Nefm
-0.5744	4.796	0.1383	Cox7c
-0.4441	4.28	0.1384	Ubald1
0.5896	4.897	0.1384	Zfp438
-0.4749	3.877	0.1384	Zfp955a
1.397	2.056	0.1387	Itga7
1.573	3.927	0.1387	Havcr2
-0.2681	7.128	0.1387	Mapk8ip3
2.011	2.168	0.1387	1700047M11Rik
-0.6938	3.653	0.1387	Dbp
-0.5293	7.966	0.1388	Syp
0.4687	4.596	0.1389	Fam204a
0.4056	4.158	0.1389	Mxd1
0.6623	5.805	0.1389	Rhoq
0.3491	7.838	0.139	Crebbp
1.272	2.864	0.139	Trim12a
1.294	3.313	0.1391	Tnfrsf1b
1.491	1.588	0.1392	Gm49130
1.29	3.658	0.1394	Cpt1a
0.339	5.115	0.1394	Rnpc3
0.4747	5.227	0.1395	Dtx4
-0.4887	4.39	0.1396	Armcx1
-0.4747	7.033	0.1398	Enc1
-0.4743	3.93	0.1399	Dmwd
0.6028	3.242	0.14	Uckl1
-0.7338	2.127	0.14	Gm15337
-0.5273	3.34	0.14	Psmb3
-1.051	1.821	0.14	Lrrc75b
-0.612	5.264	0.14	Cd200
-0.4486	4.243	0.14	Tmem184c
-0.4584	7.236	0.1402	Gm28905
0.4292	5.538	0.1403	Wrn
2.163	1.77	0.1403	Morrbid
0.5408	4.399	0.1403	Sp1
0.6106	7.729	0.1403	Pbx3
0.4658	4.695	0.1403	Sypl
-0.2553	6.519	0.1403	Dync1li2
0.4586	4.733	0.1403	Resf1
0.5491	4.582	0.1403	Mettl25
0.281	9.813	0.1403	Macf1
-0.8846	2.837	0.1403	Cox7b2
-0.8337	2.372	0.1403	4930445B16Rik
0.7223	7.977	0.1403	Maml2
0.3108	5.765	0.1403	Firre
-0.4009	4.923	0.1406	Gpr162
0.401	3.788	0.1407	Slc35f5
-0.3747	6.188	0.1407	Got1
-0.4785	3.094	0.1407	Aip
-0.5212	4.909	0.1409	Ppp1ca
1.343	3.247	0.1409	Tcirg1
-1.685	6.599	0.1409	Gm32647
0.355	6.428	0.1409	Cnot6l
-0.4548	6.77	0.1411	Arhgap20
0.5626	6.705	0.1411	Retreg1
-0.5478	4.241	0.1411	Pomp
1.033	2.025	0.1415	Elovl1
0.5008	4.201	0.1416	Adam15
1.706	4.523	0.1416	Lcp1
-0.53	2.9	0.1416	Ccdc137
-0.7964	3.459	0.1416	Psmb6
1.813	2.29	0.1416	Sh3tc1
0.5299	8.385	0.1416	Mast4
-1.089	4.161	0.1416	Htr7
1.375	4.082	0.1416	Cmklr1
0.4437	6.978	0.1416	4933406I18Rik
-0.5739	2.711	0.1416	B9d1
-0.5686	5.532	0.1416	Rnf112
-0.431	4.657	0.1417	Rap2b
0.4664	5.475	0.1419	Npc1
-0.3899	5.1	0.1419	Amer2
0.8494	2.562	0.142	Mfsd12
0.3404	5.366	0.1421	Nploc4
-0.4938	4.086	0.1421	Nphp1
0.4472	5.058	0.1421	Ivd
-0.8232	2.752	0.1421	Gm10848
-0.5615	4.445	0.1421	Rpsa
-0.433	4.286	0.1421	Ptov1
3.237	1.334	0.1421	Card11
-0.3854	4.488	0.1421	Bcas2
-0.2705	6.857	0.1423	Hk1
0.3401	6.274	0.1423	Smurf2
0.9193	2.515	0.1423	Gm37420
-0.3561	6.499	0.1426	Nfe2l1
-0.4222	7.2	0.1426	Bmerb1
0.7768	2.999	0.1426	Gnb1l
-0.7921	2.925	0.1426	Gcsh
1.654	4.12	0.1426	Atp13a4
-0.4766	4.625	0.1426	Gpr22
0.5697	8.368	0.1426	Srgap2
0.9121	5.72	0.1426	Ston2
-0.4481	4.596	0.1429	Acap3
-0.3601	6.307	0.1429	Mtpn
-1.228	3.686	0.1429	B130024G19Rik
-0.5398	3.758	0.1429	Zfp382
-0.5676	2.423	0.143	Smim17
-0.6079	2.809	0.143	Zmynd19
-0.5173	3.198	0.143	Naxe
0.3417	5.483	0.1431	Msantd2
2.383	2.596	0.1432	Pllp
-0.4525	6.472	0.1432	Elavl4
-0.7507	3.546	0.1432	Ndufs6
0.9691	3.386	0.1432	Cped1
-0.5676	7.349	0.1433	Nrgn
1.813	1.931	0.1433	Gm9750
-0.9491	3.101	0.1433	Pcdh20
-0.4073	4.649	0.1433	Pcnx4
1.208	3.002	0.1433	Irag2
-0.732	4.071	0.1435	Dsel
-0.3327	6.857	0.1435	Dlg4
-0.6606	6.707	0.1435	Hpca
1.198	2.635	0.1435	Pik3r6
0.4349	4.832	0.1435	R3hcc1l
0.4952	3.471	0.1436	Atad2
0.5274	4.136	0.1436	Cep85
-0.7951	4.666	0.1437	Lgi2
-0.3641	9.076	0.1438	Slit3
-1.474	1.85	0.1438	Krt9
-0.284	8.163	0.1438	Atp2a2
-0.3596	4.813	0.1441	Sfr1
0.9716	3.606	0.1441	Lama4
-0.3971	8.602	0.1442	Klhl29
0.444	6.92	0.1442	Bbs9
1.206	4.122	0.1443	Bin2
-0.3093	8.535	0.1443	Astn1
-0.7526	2.661	0.1443	Gm14703
-0.7372	3.261	0.1444	Atp5e
-0.4867	3.275	0.1444	8430429K09Rik
1.496	2.484	0.1445	Hhip
1.474	4.101	0.1445	Nfatc1
1.389	4.798	0.1445	Unc93b1
-0.733	2.798	0.1445	Pam16
-0.4252	3.904	0.1445	Rabac1
-0.785	2.728	0.1446	Tomm7
-0.6466	2.126	0.1446	Ints5
-0.6443	3.167	0.1446	Hey1
1.707	2.087	0.1448	Ppp1r18
3.358	1.519	0.1448	Gm29521
-0.4649	9.327	0.1448	Cntn4
-0.3569	6.792	0.1448	Cbx5
-0.3978	4.696	0.1448	Psme3
1.473	2.153	0.1448	Nlrp5-ps - ENSMUSG00000041596
-0.8031	2.051	0.1448	Mrps36
-0.2734	7.179	0.1448	Ncl
[truncated: 55,011 more rows]

## Sheet: DE-4_Microglia
logFC	AveExpr	p_val_adj	gene_names
7.003	6.481	2.365e-09	Atp8a2
-2.432	9.866	6.627e-07	Arsb
1.999	4.058	3.999e-05	Cep85
-5.896	-1.293	0.0001063	Rpl31-ps21
-5.671	1.928	0.0001063	Cd36
-1.62	5.632	0.0001063	Ubc
-3.229	5.965	0.0001063	Nme7
-3.448	6.459	0.0001063	Nrxn1
-5.176	-1.217	0.0001308	Pcna-ps2
5.068	-0.9424	0.0001414	Cldn34c1
-1.243	7.838	0.0002286	Xpr1
3.224	3.515	0.0002854	Samd4
-1.333	5.624	0.0002854	Cmtm8
1.261	7.245	0.0002854	Slc12a2
-1.038	5.467	0.000342	Gpx1
-3.8	-0.2017	0.0003647	Scml2
-1.603	3.923	0.0006137	Rasgrp4
5.088	2.323	0.0006137	Mpp7
3.616	0.7726	0.0006891	Naip3-ps1
1.259	4.292	0.0006898	Clcf1
-1.292	4.4	0.0007309	Tagln2
1.261	3.96	0.0007859	Nipal3
-1.876	5.208	0.0007859	Sfmbt2
1.514	3.589	0.0009268	Tatdn3
1.748	5.812	0.0009815	Gm45837
1.684	3.23	0.001059	Rnf17
-5.636	0.7765	0.001146	Adgrg5
3.17	0.6357	0.001171	Pde2a
0.9938	9.412	0.001201	Magi1
-0.9221	5.861	0.001472	Tgm2
0.8234	4.658	0.001541	Coa8
3.803	-0.5002	0.001778	Gm10037
0.7406	4.747	0.0018	Purg
-4.79	1.167	0.001864	Gm29536
2.025	1.415	0.001864	Zc2hc1a
-0.7005	5.288	0.002092	Mid1ip1
0.8759	4.674	0.002096	Gm46515
-0.8255	4.915	0.002271	Lfng
-4.786	-1.099	0.002271	Klk1b22
-0.8315	6.648	0.002271	Evi2
-3.124	-0.09776	0.002271	Gm7285
-0.9142	8.392	0.002271	Ccr5
-1.061	3.52	0.002271	Glrx
-1.28	5.814	0.002271	Gm49342
-3.713	1.835	0.002271	Pcnx2
2.197	1.739	0.002485	Stpg1
4.623	-0.4057	0.002588	1700030C10Rik - ENSMUSG00000099759
-6.22	0.8048	0.002875	Actr3-ps
1.571	4.26	0.002875	Zfp862-ps
-0.9582	3.849	0.003058	Selenon
-0.9553	6.36	0.003058	Hsp90aa1
-1.134	4.979	0.003104	Bzw2
0.5449	6.389	0.003207	Ttc14
1.011	6.09	0.003241	Dapk1
0.979	5.793	0.003288	Mras
-1.936	1.218	0.003402	Gm47448
-3.599	0.1391	0.003507	Gm36266
1.099	5.319	0.003507	Nln
0.7392	5.249	0.003938	Cep162
-1.436	3.673	0.003948	Zfyve21
-0.9972	4.637	0.003948	Lbh
-4.743	0.02506	0.003948	Gm14584
-0.7739	6.662	0.004042	Tspan13
1.314	3.843	0.00408	Elavl4
-2.96	0.2496	0.004094	Gm37800
-1.43	2.665	0.004094	Cnn2
4.852	0.2787	0.004094	Zfp125
-2.65	1.522	0.004094	Gm55594
-1.336	3.654	0.004094	Pdzrn4
-0.6415	4.753	0.004094	Atf4
-0.6135	5.229	0.004234	Myadm
0.8432	3.736	0.004319	Mon1a
-0.6083	6.059	0.004319	Ccnd1
-0.6914	5.009	0.004319	Pdia5
0.9118	4.291	0.004319	Rcan3
-1.188	4.308	0.004319	Ets2
0.5619	6.811	0.004326	Crebrf
-0.9589	8.389	0.004384	Ssbp2
0.8371	5.809	0.004499	Ide
-1.151	5.413	0.004499	Ier5
-1.758	3.03	0.004499	Spock1
-0.6748	8.829	0.004499	P2ry13
-1.005	4.341	0.004499	Tuba1a
0.5581	6.924	0.004533	Mbtd1
0.7421	4.509	0.00455	B3galnt2
0.7185	4.886	0.004663	Glrp1
2.825	2.458	0.004663	Gm43821
-6.85	1.084	0.004663	4930519F16Rik
-0.72	8.938	0.004663	Rnase4
-0.7869	7.783	0.004663	Hspa8
-0.8884	6.711	0.004857	Naalad2
0.8861	6.962	0.004942	Iqsec2
0.625	5.561	0.004942	4833420G17Rik
-0.692	6.657	0.004942	Commd8
-0.6532	6.493	0.005067	Tmx4
3.289	-0.3772	0.005067	Unc5a
-0.4392	9.322	0.005199	Ddx5
0.6058	4.738	0.005221	Cyp27a1
-1.234	1.719	0.005221	Ppp1r3d
-0.8881	5.013	0.005285	Jund
-0.8508	6.411	0.0054	Actg1
0.6351	6.56	0.0054	N4bp2l1
-1.649	2.161	0.005448	Gm30411
-0.951	4.894	0.005448	Irf2bpl
1.843	1.572	0.005506	C030034L19Rik
-0.6301	6.436	0.005506	Sting1
1.977	4.77	0.005582	Ccdc192
-2.001	1.667	0.005592	Hspa1b
-1.097	4.64	0.005627	Cited2
0.6391	5.689	0.005723	Rspry1
-0.7933	4.619	0.005723	Cdk5rap1
-0.936	5.099	0.005723	Kdm6b
-0.4695	7.09	0.005723	Ndfip1
0.7122	5.032	0.005791	Arsk
-1.775	3.105	0.005791	Spry1
-1.64	5.619	0.005791	Alox5
-2.419	1.505	0.005791	Zc3hav1l
0.57	6.088	0.005807	Pot1b
1.068	3.386	0.005832	Slc35d2
-1.421	1.82	0.005885	H4c4
-0.6725	8.003	0.005956	Tnfrsf21
0.8286	4.044	0.005956	Gm47754
-0.7544	4.696	0.005956	Midn
0.6916	5.117	0.005956	Agl
-0.6711	5.564	0.00608	Sub1
1.346	3.295	0.00608	Hectd2
-2.346	1.02	0.006181	ENSMUSG00000120712
-0.6051	4.051	0.006181	Hexim1
-1.072	5.095	0.006181	Fhad1
0.5126	6.33	0.006181	Vwa8
1.607	3.878	0.006181	Rasgrf2
-0.6671	6.656	0.006702	Bhlhe41
1.501	3.252	0.006756	Gm26782
-0.4951	9.027	0.006756	Basp1
-0.6711	3.587	0.006756	Ubl4a
0.6707	3.916	0.006756	Pink1
-4.799	4.257	0.006756	Gm47283
-3.768	-0.4016	0.006756	Cd300ld
-1.293	4.325	0.006756	Epha2
0.7229	7.051	0.006756	Plxdc1
-1.497	1.957	0.007122	Hspa1a
-0.6414	8.071	0.007309	Atg10
-0.7823	5.201	0.007365	Nod1
-0.5566	5.659	0.007365	Cln8
-1.161	7.063	0.007365	Gpr183
-1.026	4.764	0.007441	Pnp
0.6121	4.722	0.007441	Rrnad1
0.7407	3.768	0.007672	Zfp760
0.7351	5.392	0.00803	Slc25a26
-0.6506	6.851	0.008112	Ogfrl1
-0.8199	5.695	0.008112	Stk17b
-0.7061	3.968	0.008112	Lrrc25
-0.7806	6.201	0.008112	Btg1
-0.5095	7.351	0.008153	Samsn1
0.3863	8.071	0.008153	Phyhd1
0.5681	6.466	0.008197	Banp
-0.5892	5.844	0.008208	Gngt2
-0.5459	6.088	0.008208	Eloa
-1.288	4.345	0.008224	Hmga2-ps1
-0.6584	4.825	0.008529	Arf6
-0.5095	5.686	0.008756	Nudt4
-0.8244	4.027	0.008756	Hmgb2
-1.197	5.416	0.008849	Junb
-0.6891	5.572	0.008849	Hhex
0.7922	7.025	0.008849	Kif13a
-1.701	4.614	0.008849	Gm10138
-1.213	2.004	0.008961	Zfp536
-2.305	1.083	0.008961	Gm47794
0.6295	9.965	0.008961	Prkn
-0.6596	6.22	0.009018	Evi2a
0.5545	5.004	0.009175	1110002L01Rik
-0.7711	7.998	0.009175	Rin2
-1.246	3.605	0.009175	Trib1
-0.5679	4.744	0.009175	Sptssa
-0.4662	6.772	0.009175	Tifab
-1.173	5.78	0.009175	Ppp1r10
0.5	7.296	0.009175	Kansl1l
0.4416	5.376	0.009175	Cnot10
0.7163	3.354	0.009183	Nsdhl
1.143	3.37	0.009231	Nudt6
0.9737	2.331	0.009231	Gm20045
-0.3877	7.584	0.009231	Pla2g15
-0.7974	4.02	0.009257	Sod1
0.5215	6.843	0.0096	Rilpl1
-0.9764	5.239	0.009648	Sox4
0.3943	6.87	0.009656	Luc7l3
0.6013	4.224	0.009656	Krba1
-0.7576	4.126	0.009656	Acvrl1
0.7159	4.98	0.009694	Zfp933
-1.22	1.731	0.009698	Nsl1
-0.4485	6.713	0.01002	Morf4l1
-0.5392	6.768	0.01023	Arl4c
0.9834	7.397	0.01038	F11r
-1.76	1.458	0.01048	Kcna3
-1.046	6.667	0.01048	Dusp6
-1.036	3.313	0.0105	AI504432
0.5737	4.092	0.01054	Agfg2
-1.617	0.03388	0.01059	Gm38316
-0.5506	6.04	0.01065	Usp22
-0.5725	6.458	0.01077	Plod1
-1.304	7.144	0.01094	Il1a
0.5323	5.471	0.01098	Stard3nl
0.4104	6.263	0.01106	Cdc37l1
0.5821	4.509	0.01106	Crebzf
-0.4824	5.805	0.01108	Limd2
0.684	3.543	0.01108	Flvcr1
0.5586	5.312	0.01108	Rttn
0.46	5.783	0.01112	St7l
0.4458	5.299	0.01112	Cep295
0.5442	5.091	0.01113	Gpd1l
0.4347	5.948	0.01113	Ubp1
-0.4345	6.876	0.01113	Polr2a
0.4521	5.33	0.01113	Slc17a5
-0.4931	5.677	0.01117	Skp1
-3.568	-1.101	0.01154	Gm48733
-0.4638	8.064	0.0116	App
0.6022	5.252	0.0116	Zfp398
-1.171	3.165	0.01187	Odc1
0.5487	5.639	0.01187	Pcmtd2
-0.6786	4.51	0.01188	Osgep
0.8123	4.964	0.01191	Cast
-0.9154	2.6	0.01196	Gm45472
0.6746	8.937	0.01202	Sipa1l2
0.644	3.867	0.01215	mt-Nd6
0.5118	5.381	0.01215	Myo6
1.522	1.527	0.01218	Gm7644
-0.3984	7.225	0.01227	Hmgb1
0.4513	7.231	0.0123	Btaf1
-0.5725	8.782	0.01282	Cables1
0.6998	7.09	0.01283	Trak1
-0.6918	3.652	0.01302	Fosl2
-1.576	1.056	0.01302	Synpo
-0.6247	6.252	0.01302	Vps37b
0.5325	6.748	0.01302	Appl2
0.5727	4.952	0.01303	Elmod2
0.6404	5.855	0.01303	Slc1a2
-0.6787	4.094	0.01303	Med7
-0.4511	6.235	0.01306	Saraf
-2.806	3.098	0.01306	Rab37
-1.299	2.57	0.01306	Gm45777
4.358	-0.2762	0.01306	Gm20559
-0.8028	4.063	0.01307	Tmsb10
-1.447	1.672	0.01307	Gm10762
-0.9736	2.363	0.01316	Relt
0.9049	4.995	0.01333	Zfp467
-1.104	1.99	0.01335	Thap6
-0.4163	7.534	0.01335	Tspan7
-0.7331	4.858	0.01335	Ppp1r3b
-0.9723	6.663	0.01335	Zfand5
-0.4198	7.016	0.01346	Hcls1
-1.908	1.798	0.01349	Tob1
-0.8905	6.205	0.01349	Klf6
-3.551	-1.001	0.01352	Gm5503
-2.824	1.197	0.01364	Glipr2
-0.3808	7.2	0.01364	Ywhaz
0.5603	8.075	0.01373	Atp2c1
-0.6315	4.253	0.01394	Zfp513
-0.5634	4.305	0.01394	Slc66a1
-0.4259	7.647	0.01394	Atf6
-0.7716	7.391	0.0141	Txnip
-1.127	6.027	0.01424	Btg2
0.3793	6.772	0.0143	Zfc3h1
-0.7437	3.383	0.01451	2310022B05Rik
-0.8822	4.223	0.01452	Ccdc62
0.3757	5.989	0.01468	Lats1
-0.4566	5.039	0.01468	Zyx
-0.5047	7.791	0.01472	Rhoa
0.5174	7.294	0.01477	Tmem104
0.4178	7.779	0.0148	Eri3
-0.7303	4.043	0.01482	H2az1
-0.475	8.27	0.01485	Efhd2
-0.7568	4.69	0.0149	A630089N07Rik
-0.8703	3.359	0.01501	Phospho1
0.6	5.799	0.0151	Zfp951
-1.121	4.783	0.0151	Errfi1
-0.8186	11.67	0.0151	Cst3
-0.432	6.503	0.01512	Ywhag
0.493	5.366	0.01512	Ap3s1
-1.572	1.904	0.01531	ENSMUSG00000120054
-0.4223	5.656	0.01535	Micos10
0.4303	5.031	0.01535	Ttc27
0.5144	7.973	0.01555	Spire1
0.5268	4.056	0.01556	Ddx43
0.3687	5.692	0.01556	Txndc16
0.3594	7.166	0.01559	Bltp1
-0.6895	5.804	0.01561	Tagap
-0.8134	4.767	0.01561	Cbx4
-0.5978	5.81	0.01564	Xbp1
-0.5597	8.107	0.01572	Ctsc
-0.3956	6.585	0.01575	Atp6ap2
-1.089	1.96	0.01575	Lhfpl3
0.9329	4.195	0.01575	Dusp12
0.5117	5.744	0.01614	Agtpbp1
-0.7773	5.594	0.01632	Map3k20
0.4374	5.165	0.01645	Ttc5
2.318	1.205	0.01653	Arhgap10
0.5419	4.433	0.01654	G2e3
-0.5215	4.856	0.01666	Slbp
-0.7793	3.646	0.01666	Otud1
-0.4288	5.141	0.01666	Arl1
-0.5154	6.457	0.01668	Azin1
-0.7676	4.612	0.01668	Cdk5r1
-1.725	6.613	0.01675	Jun
0.5126	6.116	0.01676	Naip6
-1.645	2.246	0.01676	Nbl1
-1.802	1.805	0.01697	Gm44574
-1.092	2.726	0.01697	Ccr2
-0.4911	10.29	0.01702	Selenop
-1.104	3.282	0.01702	Taf13
-0.7596	5.231	0.01702	Prkab1
-0.9711	2.633	0.01711	Snhg8
4.128	2.663	0.01712	4930481A15Rik
0.5594	4.755	0.01712	Cep70
2.167	4.482	0.01712	Ulk4
-0.501	6.532	0.01712	Smad7
-0.5004	6.833	0.01712	Fcgr1
-1.165	2.345	0.01712	Klf10
-0.6581	4.222	0.01719	Sde2
0.7386	3.929	0.01724	Sntb2
0.3757	7.142	0.01724	Abl2
-0.4727	6.007	0.01735	Zfp706
0.7441	3.418	0.01735	Xylb
-2.021	2.299	0.01763	Gm29282
-0.4218	5.587	0.01763	Snx17
1.301	2.26	0.01763	Zbtb46
-1.321	3.345	0.01763	Chic1
-0.4715	8.316	0.01763	Bin2
-0.395	8.338	0.01767	Gnai2
-0.5931	5.229	0.01784	Nudc
4.968	2.155	0.01795	ENSMUSG00000121318
-0.4546	6.614	0.01796	Kras
0.6782	2.771	0.01803	Mfap3l
-1.01	4.138	0.01832	Mcc
1.623	4.512	0.01839	Esrrg
0.7601	6.97	0.01839	Rab6b
-0.6471	3.572	0.01839	Rraga
0.4842	6.137	0.01839	Slc38a6
0.3884	5.174	0.01839	Tbc1d32
-0.8685	3.311	0.01846	Tuba1c
0.8616	2.53	0.01847	Rsl1
0.4386	6.336	0.01852	Galk2
1.14	1.43	0.01855	Gm26621
0.4948	6.882	0.01856	Ggta1
4.584	0.973	0.01856	Fgf2
-1.165	5.32	0.01857	Zfp729a
-0.8588	6.164	0.01863	Fads1
-0.4522	4.204	0.01867	Atxn7l3
0.4196	6.197	0.01867	Trim12a
2.135	0.4344	0.01867	Copz2
-0.8845	3.154	0.01867	Gramd3
-0.85	2.671	0.01867	Trappc2l
-0.7073	5.303	0.01867	Manf
2.346	0.1108	0.01867	Gm26641
-1.312	2.732	0.01895	4933433G15Rik
-0.8089	3.405	0.01909	Bmyc
-0.3554	7.232	0.01916	Hnrnpc
0.4985	5.579	0.01927	1110019D14Rik
-0.6395	5.692	0.01927	Zeb2os
-1.789	0.4527	0.01937	Gm10382
2.65	1.034	0.01939	C130046K22Rik
0.4048	7.028	0.01939	Cpsf6
0.9207	4.646	0.01939	Gm37306
1.502	0.2082	0.01939	Gm37296
0.5118	4.391	0.01939	Pcgf5
-0.5508	6.398	0.01939	Hnrnpab
-1.576	1.853	0.01939	Hspb3
-0.9525	5.631	0.01939	Dnajb4
-0.791	6.91	0.01944	Sgk1
-0.9981	6.505	0.01944	Srgn
-0.4884	5.618	0.01949	9130015G15Rik
-1.01	5.274	0.0198	Arrdc3
-0.9109	3.695	0.0198	Isyna1
0.6599	4.571	0.01993	Kdm1b
-0.4593	7.839	0.02	Calm2
-1.14	1.309	0.02005	Hyal2
0.7846	3.391	0.02007	Ift81
-0.3406	8.658	0.02007	Lcp1
-0.4526	10.67	0.02008	Lgmn
-0.6986	6.227	0.02023	Sfi1
0.5139	4.944	0.02023	Tfdp2
-1.462	2.139	0.02029	Klf4
-2.191	0.4159	0.0204	ENSMUSG00000120692
-0.3699	6.327	0.02041	Adam15
-0.731	6.559	0.02042	Alox5ap
-0.3825	6.085	0.02068	Derl1
0.5423	4.535	0.02068	Styx
-0.8102	4.083	0.02075	P2ry10b
0.4094	5.801	0.02079	Zfp182
-0.6291	4.276	0.02079	Ddx54
0.3448	7.039	0.02079	Gm21992
0.3216	7.17	0.02079	Phf20l1
0.4522	6.163	0.02085	Lyrm4
-0.4342	5.734	0.02091	Lman2
1.04	5.02	0.02095	Smo
0.4965	4.108	0.02095	Gm49336
-0.5494	5.61	0.02095	Pnrc1
-0.5857	5.739	0.02095	H3f3a
-1.711	0.2274	0.02095	Gm9891
-0.6096	5.626	0.02101	Dstn
-2.63	1.382	0.02102	Atp6v0e2
0.4245	5.098	0.02104	Frmd8
-0.6403	4.814	0.02105	Oaz1
-1.32	0.9482	0.02105	Fndc7
0.9321	3.235	0.02105	Oscp1
-1.113	3.977	0.02105	Gm47469
-0.51	6.208	0.02116	Mat2a
-0.364	8.12	0.02134	Adgre1
0.4443	4.771	0.02134	Tecpr2
-0.9514	3.031	0.02134	Plppr4
-0.6346	3.695	0.02134	Gpr35
1.359	2.476	0.02134	2610005L07Rik - ENSMUSG00000071793
1.154	4.91	0.02134	Mapkapk3
-0.5739	4.896	0.02139	Nxt2
-0.5831	4.327	0.0216	Cd276
0.5193	3.767	0.02186	Med20
0.3476	6.499	0.02186	Lpcat1
-0.582	6.132	0.0219	Etv1
0.4337	5.542	0.0219	Auh
-0.5432	11.19	0.0219	Actb
-0.5415	6.991	0.022	Tlr13
-3.425	-0.802	0.02227	Afm
0.4245	5.666	0.02232	Cplane1
0.4115	6.235	0.02232	Foxk2
-0.5276	7.286	0.02234	Spred1
-1.265	3.56	0.02234	Gm15441
0.4184	6.178	0.02234	Vps13a
1.696	4.127	0.02237	Abcg3
0.3872	6.467	0.02239	Npepps
0.4391	4.922	0.0225	Ago4
-1.379	4.024	0.02252	Socs3
-1.713	2.579	0.02252	ENSMUSG00000120869
-1.012	6.393	0.0226	Tom1l1
-1.293	3.82	0.0226	Id2
0.7168	6.113	0.0226	Rab11fip5
-1.335	2.599	0.02266	Ccdc102a
-0.6927	7.653	0.02266	Med12l
-0.4229	6.266	0.02266	Etf1
-0.9465	2.868	0.02266	Trmt112
0.9373	3.502	0.02266	Gm50048
-0.3464	5.66	0.02277	Spg20
1.968	4.673	0.02277	Trps1
-0.6435	7.811	0.02277	Gcnt1
0.3105	7.232	0.02278	Zup1
-0.3872	7.34	0.02278	Ifnar2
0.6058	3.755	0.02278	Nbdy
0.7522	7.008	0.02279	mt-Cytb
-0.4798	6.743	0.02281	Wdr1
-0.9186	1.742	0.02301	Lratd2
-0.5353	5.44	0.0231	Txnrd1
-1.067	5.469	0.02311	Adrb2
1.517	0.4695	0.02313	Numbl
-0.4723	6.141	0.02313	Fam111a
-0.5824	3.363	0.02313	0610010K14Rik
-1.016	5.581	0.02313	Igsf8
0.3736	7.655	0.02315	Ccdc93
-0.451	6.549	0.02315	Slc44a2
0.3655	7.43	0.02315	Herc4
0.3154	8.142	0.0232	Ddx17
0.8714	3.255	0.0232	Gm14410
1.359	0.7235	0.02324	Zfp783 - ENSMUSG00000121486
-0.6398	9.874	0.02324	Tmsb4x
-1.549	0.9748	0.02334	Ccnd2
-0.502	5.545	0.02353	Adora3
-0.4512	8.264	0.02353	Cap1
1.053	2.817	0.02353	Fgf1
0.5005	4.245	0.02353	Poc5
-1.302	4.332	0.02353	Arhgap27os3
-0.7627	9.496	0.02353	Tmem119
-0.7446	5.755	0.02353	Tnfsf13b
0.3935	6.66	0.02353	Sipa1l3
0.4302	5.577	0.02353	Sec24a
-1.771	1.454	0.02353	1700020L13Rik
-0.7126	2.806	0.02354	Nenf
-0.7501	2.987	0.02364	Tmcc3os
-0.9422	6.623	0.02364	Mir142hg
0.4839	5.497	0.02412	Stard8
-0.5834	5.076	0.02428	Mmp2
-0.9034	4.458	0.02435	Nectin2
0.4297	4.178	0.02438	Sugp2
1.631	0.5576	0.02445	Gm3055
0.3706	4.902	0.02473	Sec61a2
-0.3254	6.585	0.02474	Ralb
-0.2968	7.581	0.02497	Snx18
0.3472	5.816	0.02498	Cdc123
0.6154	7.503	0.02498	Mlxip
-1.97	0.6946	0.02498	Meig1
-0.8735	3.033	0.02501	Cycs
-1.516	3.007	0.02501	Kcp
-0.9674	2.843	0.02506	Zfp458
-0.6441	4.158	0.02515	Ninj1
-1.093	3.042	0.02515	Fam167b
-1.72	3.231	0.02515	Unc5cl
0.8964	1.756	0.02528	9530062K07Rik
-0.3101	7.786	0.02546	Rac1
0.6009	5.831	0.02546	Naa16
0.4458	4.86	0.02546	Unkl
0.4503	6.132	0.02546	Trim14
-0.4959	4.323	0.02581	Galnt4
-0.7613	5.957	0.02583	Dusp16
-0.579	6.462	0.02585	Gng10
-0.8309	3.65	0.02585	Gm20721
-0.5203	7.841	0.02601	Ddx3x
-1.825	1.712	0.02609	Gm34455
-0.9745	4.989	0.02629	Bcl6
-1.278	2.808	0.02629	Hes1
0.4862	4.074	0.02636	Tspan33
0.4902	6.844	0.02642	Dtnbp1
-0.6014	4.733	0.02647	Gm49368
0.4129	7.221	0.02647	Kif13b
-0.3899	5.665	0.0265	Slc26a2
0.6042	7.123	0.0265	Frrs1
-1.231	4.168	0.02666	Marcksl1
-0.3208	6.778	0.02674	Arf1
0.8279	2.952	0.02683	St3gal1
-0.64	4.101	0.0269	Pqbp1
-0.3679	5.997	0.0269	Rhog
-0.431	5.235	0.027	Tspan31
0.4095	6.623	0.02703	Il15
-0.5782	4.906	0.02708	Stk38l
-0.4579	10.39	0.02714	Sparc
-1.81	1.849	0.02714	1700020N01Rik
-0.6898	3.114	0.02714	Lamb2
-0.4073	6.194	0.02714	Arpc4
-0.4249	6.345	0.02714	Selenof
-0.5098	5.721	0.02714	Arpc3
-0.9882	2.944	0.02714	Camkk1
-0.382	7.736	0.02714	Ywhae
0.6243	6.195	0.02714	Cdk17
-0.6599	5.502	0.02755	Dennd2c
1.215	1.581	0.02755	Ldlr
0.5323	3.658	0.02755	Mettl3
0.3807	5.924	0.02755	Snapc3
0.4224	5.863	0.02755	Plekha5
-0.5371	3.476	0.02758	Fkrp
1.393	1.628	0.0276	Gm31508
-0.7884	4.595	0.0276	Plk3
0.9216	6.554	0.02764	Rbfox1
0.4291	4.927	0.02767	Zfp866
0.3354	6.654	0.02768	Ubn1
-1.389	1.546	0.0277	Dusp18
-0.5679	5.31	0.02781	Tal1
-0.9357	12.97	0.02783	Lars2
-1.259	1.69	0.02786	Ninj2
-0.6555	3.515	0.02786	Snrnp35
-0.8755	2.468	0.02786	Ubiad1
-0.4402	4.578	0.02786	Nrep
0.3698	5.933	0.028	Invs
-0.8234	2.439	0.028	Gm40117
0.4282	5.047	0.02802	Gm1976
-1.696	0.6486	0.02802	4930567H12Rik
0.6829	4.804	0.02821	Il15ra
-0.7632	4.262	0.02821	Tmem100
-0.4413	5.268	0.02828	Tspan3
-0.7593	2.559	0.02831	Pcyox1l
-3.904	0.7607	0.0285	Brinp2
0.3635	6.687	0.02855	Fubp1
0.4557	6.08	0.02872	Ikzf2
-0.6404	3.009	0.02893	Uqcc2
-0.6686	5.521	0.02904	Tob2
-0.4337	9.941	0.02915	Marcks
-0.4112	5.188	0.02925	Aamp
-1.066	0.9139	0.02931	Dusp8
-1.613	1.587	0.02931	Il1r2
-1.105	5.983	0.02931	Zfp36
-0.9801	2.442	0.02934	Capn1
-3.226	5.445	0.02934	Cd300lf
0.3907	6.264	0.02934	Rps6kb1
-0.6625	6.243	0.02934	Ube2e2
-0.5592	3.745	0.02936	Grcc10
0.6532	3.57	0.02952	Lrrc39
0.4845	4.321	0.02952	4933427D14Rik - ENSMUSG00000020807
0.602	3.382	0.02952	9430091E24Rik
0.4303	4.269	0.02952	Rgl3
0.4401	4.629	0.02952	Mtx3
-0.3928	7.447	0.02952	Mlec
0.6077	3.863	0.02952	Acaa1a
-1.548	0.8986	0.02953	Edn1
0.5068	8.441	0.02953	Pnpla7
-0.3977	4.973	0.02955	Rcn2
-1.022	2.088	0.02955	Tnfrsf12a
-0.4004	5.624	0.02961	Rab35
-0.5922	6.577	0.02963	H3f3b
-0.3569	8.002	0.02967	Skil
-0.4804	5.081	0.02967	Rabgef1
-0.8587	1.278	0.02967	Tspyl3
-0.4923	7.488	0.02969	Sdcbp
-0.4116	7.169	0.02976	Atp6v0a2
0.3443	5.305	0.02976	Thoc1
0.4131	4.123	0.02976	Sorbs1
-0.614	3.731	0.03009	Taf7
-0.9882	3.056	0.03033	ENSMUSG00000120693
0.5754	4.257	0.0304	Ankrd28
0.3421	7.309	0.03044	Scaper
0.6693	8.39	0.03044	Cd84
-0.7786	1.886	0.03044	Med31
0.375	4.899	0.03051	Trmt11
0.428	7.56	0.03065	Slc6a6
-0.8282	5.712	0.03069	Ubb
0.369	5.757	0.03069	Flcn
1.363	2.304	0.03069	Trim30c
1.014	1.864	0.03069	Tspan32os
0.8776	3.114	0.03069	Eml5
-1.636	0.2258	0.03069	Pnp2
-1.32	3.293	0.03069	Map3k19
-0.4323	6.326	0.03069	Nova1
0.4394	5.476	0.03069	Pik3c3
0.3373	5.993	0.03069	Dhx57
0.2829	7.554	0.0307	Mdm4
-0.3665	5.14	0.0307	Aldh3a2
0.4111	7.259	0.0307	Dhx9
1.456	0.6293	0.0307	Gm45783
0.3248	6.037	0.0307	Tsga10
-0.368	5.508	0.0307	Gm44250
1.559	5.961	0.03101	Mrc2
0.8128	1.739	0.03102	Cenpl
-0.7695	2.552	0.03134	Pdlim2
0.4407	4.649	0.03172	Zfp839
-0.6137	3.254	0.03177	Nxpe3
-0.3528	6.497	0.03177	Nfya
-0.7835	4.028	0.03178	Gsdme
1.703	0.08069	0.03178	Btbd11
-0.5935	4.393	0.03178	Rnf24
0.3656	5.999	0.03192	Zranb2
-0.4362	7.052	0.03195	Laptm4a
-1.633	3.166	0.03201	9330185C12Rik
0.4267	4.632	0.03205	Desi1
-0.4716	5.113	0.03205	Mlf2
0.4525	5.889	0.03205	Swt1
-2.262	0.4358	0.03205	ENSMUSG00000120135
-0.5607	5.758	0.03205	Lpar6
2.035	1.302	0.03205	ENSMUSG00000121092
-0.5174	6.369	0.03205	Arf4
-0.7953	2.575	0.03207	Dnajc12
1.397	1.241	0.03224	Abhd14b
1.339	5.476	0.03224	Zfp984
0.3328	7.9	0.03231	A630001G21Rik
-0.7264	2.384	0.03234	Ogg1
-0.5624	3.554	0.03245	Rinl
0.957	1.803	0.03249	1190007I07Rik
-0.7055	3.565	0.03251	Dok3
-0.7099	10.4	0.03255	P2ry12
-0.7185	3.364	0.03267	Alyref
-0.5177	6.447	0.03271	Spcs2
-0.4071	6.268	0.03271	Reep5
0.2672	7.546	0.03278	Aak1
-0.9343	2.161	0.03285	Gm16192
-1.242	0.6193	0.03286	ENSMUSG00000121108
-0.4122	5.247	0.03289	Ppp1r13b
0.3213	5.544	0.03298	Txlng
1.219	2.53	0.03323	Gm10521
-1.257	2.618	0.03323	Gm30198
0.4009	5.13	0.03325	Capn15
-0.2685	6.901	0.0333	Sf1
-0.4597	5.096	0.03335	Cldnd1
-0.6873	4.978	0.03335	Myl12a
-1.691	0.3902	0.03335	Tomt
-0.411	5.012	0.03335	Cwc15
-0.3993	4.956	0.03335	Pbx2
0.5395	6.463	0.03371	Dnajb14
-1.375	5.913	0.03434	Rgs1
-1.273	0.8952	0.03449	ENSMUSG00000120408
-0.7902	6.822	0.03449	Etv5
-0.9337	5.524	0.03449	1700025G04Rik
-0.3654	6.293	0.03449	Nfic
0.6382	2.586	0.03457	Ccdc14
0.4011	4.683	0.03474	Mrps27
-0.3856	8.392	0.03494	Ifngr1
-1.764	0.7415	0.03494	H4c16
-1.273	1.808	0.03494	Platr29
1.559	0.699	0.03494	Steap3
-0.4427	6.307	0.03504	Sall3
0.3271	7.79	0.03535	Pnisr
0.6597	3.36	0.03535	Ntng2
-0.2867	5.898	0.03535	Irf2bp2
-1.374	3.652	0.03535	Tex14
0.3926	5.701	0.03535	Cdan1
-0.7766	4.369	0.03535	Coq10b
-0.5736	5.045	0.03538	Dnajb9
-1.34	1.434	0.0354	2310067P03Rik
0.3015	6.682	0.03546	Stx16
-0.7204	2.812	0.03546	Med11
-0.405	4.237	0.03546	Gm20528
0.4926	6.645	0.03546	Plekha1
-1.063	3.72	0.03546	2810013P06Rik
0.5093	4.232	0.03547	Sparcl1
-0.6025	5.289	0.03567	Mknk2
-0.3536	6.808	0.03569	Mcl1
0.3597	6.193	0.0357	Chic2
-0.504	3.514	0.03602	Higd2a
-0.3811	4.526	0.03632	Slc25a11
0.5258	4.059	0.03632	Rbms2
-0.7267	5.062	0.03635	Pcna
-0.4906	8.969	0.03665	Rtn1
-1.834	0.7089	0.03665	ENSMUSG00000121109
-1.062	2.633	0.03665	ENSMUSG00000120261
-0.6386	4.321	0.03665	Pilra
-0.6005	2.882	0.03665	Ddah2
-0.8431	3.343	0.03665	Gm9949
-0.4735	4.794	0.03671	Pdha1
-2.245	3.698	0.03671	Klf2
-0.8875	1.885	0.03671	Emp2
0.4134	5.366	0.03671	Trappc12
-0.9043	1.955	0.03677	Gm36445
-1.04	1.516	0.03677	Gm50211
-0.4343	6.786	0.03678	Arhgap4
-1.41	3.041	0.03685	Ildr1
0.4105	4.28	0.03697	Nedd1
-0.4734	9.624	0.03702	Klf12
-0.5246	4.696	0.03702	Masp1
0.3012	5.829	0.03707	Hira
1.685	1.371	0.03707	Gm32633
-0.4957	7.313	0.03707	Ptms
-0.3919	6.251	0.03718	Clic1
-1.439	1.807	0.03728	ENSMUSG00000120371
-0.5704	3.235	0.03728	Psenen
0.4341	4.815	0.03728	Serac1
1.738	0.6183	0.03728	F830016B08Rik
0.3418	8.218	0.0373	Fcho2
-2.779	0.656	0.0373	1700023H06Rik
0.3984	4.776	0.0373	Ankrd16
0.8044	2.337	0.03732	Rida
2.431	1.207	0.03732	Aoah
0.7764	5.103	0.03732	Fam3c
-0.6834	7.103	0.03732	Myo1b
0.4636	4.67	0.03732	Zfp808
0.2992	7.055	0.03732	Cntrl
-1.28	0.7289	0.03732	Hspa2
3.08	4.623	0.03738	Abcc1
0.3101	5.517	0.03738	2700049A03Rik
-0.5029	5.093	0.03744	Tpbgl
-0.4896	4.53	0.03744	Slc7a5
-0.8607	1.715	0.03756	Gm50240
-0.5556	3.438	0.03762	Oxsm
-0.4846	4.443	0.03762	Psmd3
-0.5478	6.656	0.03762	Coro1a
0.3898	5.672	0.03762	Rbm28
-0.5141	3.837	0.0377	Cyth2
-0.5387	4.866	0.0377	Tuba1b
-0.6672	4.224	0.0377	Atp6v1f
0.47	5.84	0.0377	Emsy
-0.4786	7.708	0.03775	Rhoh
-0.3271	8.191	0.03779	Rap1b
-0.4219	5.481	0.03815	Spty2d1
0.4182	5.203	0.03816	Ttll4
0.9657	2.624	0.03816	Mri1
0.4806	3.308	0.03817	Gm26920
0.2737	7.025	0.03817	Xrn1
-0.5777	3.871	0.03817	Get3
-0.5269	3.39	0.03817	Pja1
-0.5162	7.064	0.03819	Pfn1
1.733	2.711	0.03819	Treml2
-0.4865	4.168	0.03819	Gtf2f1
0.4385	4.696	0.03819	Trim3
-0.532	3.505	0.03819	Peg10
-1.811	1.655	0.03819	Gm47819
-0.4222	8.32	0.03824	Cd53
-0.6947	7.249	0.03826	Tspan18
0.3845	5.783	0.03826	Adarb1
-0.358	5.409	0.03826	Endod1
-0.6778	4.8	0.03827	Dnajb1
-3.734	-1.116	0.03846	Lilra6
0.3616	7.025	0.03846	Pcdhgb2
-0.4385	5.019	0.03846	Cd302
-1.083	3.501	0.03853	H1f4
0.2784	6.818	0.03853	Akap8l
-0.915	1.657	0.03858	Fzd8
-0.6514	9.528	0.03858	Plek
0.2906	6.216	0.03858	Jak2
-1.256	0.3442	0.03858	ENSMUSG00000119947
0.4965	4.753	0.03859	Mettl8
1.342	1.057	0.03863	Acss2
0.4906	7.986	0.03863	Fnip2
1.032	5.596	0.03863	Cep112
-0.4819	4.518	0.03869	Slc35b2
0.3748	5.011	0.03869	Polk
-0.415	5.921	0.03869	Syngr2
-0.3617	4.848	0.03888	Syf2
1.194	0.9132	0.03888	Boll
0.317	5.839	0.03888	Cdin1
-0.6563	3.647	0.0389	Cyc1
0.3044	5.649	0.03907	Atxn3
-0.6163	2.93	0.03917	Usb1
-0.7151	2.996	0.03922	Wdr6
0.3329	4.525	0.03922	Gan
-0.2883	7.828	0.03931	Dtx4
0.3829	5.281	0.03933	Ctdsp2
-0.9063	2.965	0.03947	Gm4221
0.3716	6.267	0.03973	Ralgapa2
-0.4469	5.984	0.03981	Lman1
-0.2634	8.268	0.03981	Lnpep
0.5838	3.356	0.03995	B130055M24Rik
-0.4196	6.543	0.03995	Il17ra
0.3082	5.515	0.0402	Emc2
-0.5738	3.192	0.04058	Slc10a3
-1.316	3.708	0.04079	Igfbp4
0.2887	6.486	0.04079	Micu1
-0.3255	7.401	0.0408	Npc1
-0.7183	4.126	0.0408	Slamf8
0.6124	3.923	0.0408	Pde8a
-0.3585	5.731	0.04123	Trp53bp2
-0.2906	6.375	0.04145	Arcn1
0.6161	4.382	0.04153	Trim34a
1.655	0.6849	0.04153	Adora1
0.3433	5.183	0.04157	Phf10
-0.4809	4.202	0.04157	Btf3
-0.5279	3.462	0.04157	Spag7
2.281	0.5236	0.04157	Enpp5
0.33	6.659	0.04157	Phka2
1.541	0.06214	0.04157	Gm9520
0.3131	7.107	0.04164	Tbck
-0.8411	3.337	0.04164	Trim17
-0.6414	2.986	0.04164	Tubb4b
-0.4219	4.415	0.04164	Bcl7b
0.2763	7.279	0.04164	Ankhd1
0.396	5.146	0.04177	Tbc1d19
0.9846	1.196	0.04177	ENSMUSG00000120730
0.3956	5.7	0.04179	Dop1a
0.7534	6.156	0.04182	mt-Nd5
0.6137	3.811	0.04185	D2hgdh
1.361	0.1427	0.04185	Socs2
0.4516	3.595	0.04185	Zfp420
0.3109	5.929	0.04209	Zkscan3
-1.243	2.158	0.04221	ENSMUSG00000120546
-0.3099	11.16	0.04225	Csf1r
-1.224	2.77	0.04226	Ube2s
0.46	4.666	0.04226	Zbtb40
0.4647	7.788	0.04234	Dpy19l4
0.8433	3.597	0.04245	E230016M11Rik
-1.706	0.8885	0.04245	Gm34961
0.3778	7.127	0.04245	Creb3l2
-0.3061	6.778	0.04245	Tmem59
0.3535	4.838	0.04245	Pinx1
-0.4117	4.255	0.04245	Tmed2
-0.3096	9.356	0.04267	Cyfip1
-0.5081	4.189	0.04267	Gtf2b
0.3511	6.623	0.04283	Klhl24
0.3847	4.939	0.04287	Zfp975
0.2672	6.473	0.04287	Pdpk1
0.6843	3.28	0.04326	Olfml2b
-2.47	-0.5129	0.04326	Pira1
-1.047	0.3856	0.04326	Gm15459
0.4711	4.271	0.0433	Dgka
0.405	5.611	0.04346	Src
0.2655	7.56	0.04356	Map2k5
-0.3038	6.174	0.04356	Srsf3
-0.2753	8.543	0.04359	Adam10
-0.6401	2.827	0.04359	Sap30
0.6915	4.288	0.04394	Ell2
0.2731	8.026	0.04418	Vps13b
-0.946	2.068	0.04443	Gm41361
0.4698	4.742	0.04449	Prmt9
0.3596	6.887	0.04449	Ankrd12
-0.4136	4.06	0.04453	Tvp23b
-0.6304	2.671	0.04453	Tmem237
-1.263	1.703	0.04456	Cenpf
-0.4748	5.034	0.04465	Hnrnph2
0.3057	5.987	0.04472	Chm
-1.141	1.433	0.04477	Sag
0.3214	7.194	0.04505	Fgd4
-0.9998	3.448	0.04512	H1f2
1.142	3.198	0.04512	Mrc1
0.4388	4.678	0.04512	AW146154
-0.4102	4.392	0.04517	Otub1
0.4961	3.446	0.04526	Abtb1
-0.7019	4.167	0.04527	2410006H16Rik
0.3462	4.727	0.04531	Alkbh8
-0.8708	3.146	0.04542	Cebpd
-0.3929	4.84	0.04542	Jpt1
-1.608	0.8887	0.04542	C330011M18Rik
0.5924	2.855	0.04542	Zfp783 - ENSMUSG00000072653
-0.9608	7.225	0.04542	Arhgap15
0.8074	2.042	0.04585	Psmg4
-1.096	0.6357	0.04585	ENSMUSG00000119959
0.4928	3.838	0.04618	Zfp961
0.5468	3.786	0.04624	Ankzf1
-0.6381	3.022	0.04624	Sf3b4
-0.6039	6.118	0.04627	Gas6
-1.539	1.123	0.04628	Mycbpap
-0.4109	8.807	0.0463	Lims1
-2.086	0.2205	0.0463	Gm37125
0.3188	6.18	0.0463	Uimc1
0.3446	4.703	0.0463	Klhl28
-0.5461	2.692	0.0463	Tomm40l
0.7496	3.196	0.04646	Ccdc28b
-0.6689	2.557	0.04664	Ndufb11
-0.2809	6.135	0.04664	Wdfy1
-0.801	1.741	0.04673	Slc6a8
-0.3809	7.047	0.04683	Pmp22
-0.3145	8.019	0.04701	Arpc2
0.306	5.232	0.04701	Rars2
0.2784	5.892	0.04716	Cep120
0.3048	6.798	0.04735	Baz1a
0.3959	3.878	0.04765	Zmat5
-0.3522	7.206	0.04765	Bach1
0.4472	3.461	0.04765	Adat1
0.2877	6.904	0.04765	Slc10a7
-0.5965	3.983	0.04779	BC031181
-0.4474	6.021	0.04779	Rybp
0.3895	4.701	0.04783	Tyw1
-0.6502	7.655	0.0481	Rgs2
-1.161	0.6461	0.04813	Zfp612
1.778	2.14	0.04819	Gm10874
-2.036	0.4339	0.0483	ENSMUSG00000120067
2.497	1.425	0.04842	Gm49980
0.3524	5.117	0.04842	Dmxl2
1.37	2.525	0.04845	Pde10a
1.02	1.843	0.04849	Pla2g7
-1.492	2.183	0.04849	Lmna
-0.3673	6.666	0.04849	Prpf8
-0.3134	6.835	0.04849	Tram1
0.3548	5.91	0.04849	Usp40
0.4315	6.394	0.04872	Kat2b
-0.5719	3.17	0.04873	Fam149a
0.7016	2.51	0.04881	Zfp652os
0.6443	5.383	0.0489	4930599N23Rik
0.2618	7.425	0.04917	Cep350
-0.4933	7.545	0.04917	Fcgr2b
-0.7358	2.818	0.04917	Snu13
-0.2848	6.204	0.04928	Ppp1r18
-0.6101	5.139	0.04936	Plau
-0.7662	5.58	0.04936	Sgip1
-0.6479	2.581	0.04946	Naif1
2.226	0.1774	0.04949	Pcp4
0.3562	6.531	0.04949	Hsd17b4
-0.8556	2.89	0.04949	Cdk2ap2
0.3293	7.255	0.04969	Gng12
0.7621	2.058	0.04973	Gm17399
0.803	2.604	0.04973	Tnfsf10
-0.4296	5.914	0.04973	Ptbp1
0.3359	6.69	0.04993	Safb2
-2.518	-0.2827	0.04993	ENSMUSG00000121487
0.3846	5.937	0.04993	Aebp2
0.2837	6.503	0.05011	Slc30a7
0.8424	1.568	0.05013	Gm37320
0.5429	7.551	0.05013	Arid5b
0.4547	4.257	0.05013	Atpsckmt
0.4954	7.985	0.05015	Gsap
1.451	-0.04317	0.05047	Ankrd37
-0.383	6.49	0.05056	Tbpl1
-0.4797	8.79	0.05065	Glul
-1.738	2.111	0.05069	Gm5420
-1.229	2.553	0.05116	D730003I15Rik
0.2775	5.671	0.05119	Rev1
0.5857	4.421	0.05128	Atp1a2
-0.5485	2.98	0.05128	Sesn2
-0.363	6.988	0.05128	Ywhab
-1.515	3.443	0.05128	2010013B24Rik
-0.6991	5.877	0.0513	Lypd6
-0.3165	6.362	0.05156	Vasp
0.3962	8.18	0.05156	Sdk1
-3.325	-0.5612	0.05156	Gm40864
0.4267	4.991	0.05169	Dse
-0.3183	5.872	0.05173	Tnfrsf1a
-1.226	3.78	0.05173	Gm44710
0.932	2.068	0.05173	ENSMUSG00000121137
0.4576	3.284	0.05173	Zbtb26
0.3368	4.844	0.05173	Tmtc3
-1.08	1.954	0.05173	Gm9484
-0.5369	4.328	0.05173	Gm42962
-0.8761	1.485	0.05173	Catip
3.085	0.0988	0.05173	Gm20429
0.578	2.94	0.05173	Zfp874b
0.3677	5.714	0.05173	Ric1
-0.5443	3.127	0.05206	Plekhj1
0.2793	8.305	0.05208	Zfp652
0.3467	5.011	0.0523	Ocrl
-1.04	1.137	0.0523	Smim36
0.2644	7.003	0.0523	Ubr2
-0.5239	5.547	0.05308	Cct6a
-1.055	1.283	0.05308	Bola1
0.3428	5.429	0.05315	Zfp160
0.9359	1.981	0.05328	Snhg20
2.719	-0.2101	0.0534	Gm13241
-0.8565	2.792	0.0535	Ermap
-1.024	6.399	0.0535	ENSMUSG00000120580
-1.096	1.991	0.0535	Cks2
0.3503	5.681	0.05376	Stx5a
-0.4113	4.462	0.05376	Cstf2t
0.3521	5.943	0.05376	Zfyve1
0.3471	7.769	0.05376	Nr3c2
1.171	1.661	0.05376	Rnase6
0.4732	3.432	0.05376	Taf1a
-0.3375	11.2	0.05381	Cx3cr1
0.3745	5.529	0.05388	Shld1
-0.2571	6.323	0.05395	Myl12b
-1.402	0.9607	0.05395	Cfap77
0.6161	6.513	0.05414	Daam1
-0.7797	1.836	0.05414	Sf3b5
-0.4866	10.09	0.05418	Rapgef5
0.2785	6.816	0.05423	Nfix
0.933	4.089	0.05429	Gadl1
0.3783	4.564	0.05429	Ythdc2
-0.6945	3.058	0.05442	Rccd1
-1.37	0.9969	0.05442	Pld5
0.3847	4.3	0.05442	Prkra
-0.7451	1.959	0.0547	Pafah1b3
-1.375	0.8093	0.0547	Zfp457
-0.4425	6.162	0.0547	Tdrd3
-0.5364	6.352	0.0547	Eif1
1.38	11.44	0.0547	Lrmda
-0.32	8.627	0.0547	Tln1
-2.138	-0.001805	0.05495	Nrarp
-0.5778	2.874	0.05495	Polr1h
-0.3809	5.365	0.05504	Tmco1
0.2612	7.245	0.05521	Wls
-0.5361	2.948	0.05531	Zc3h10
-0.7685	2.092	0.05531	2810402E24Rik
0.285	5.384	0.05531	Adck1
-0.3229	4.647	0.05531	Topors
-0.3747	6.081	0.05531	Rgmb
2.576	0.9393	0.05531	Samd9l
-0.8113	3.374	0.05531	Txnl4a
-1.174	3.784	0.05531	Gimap6
-0.4167	4.998	0.05531	Med22
0.3662	5.082	0.05534	Trim12c
-0.3116	5.715	0.05534	Tlr3
-0.8475	1.745	0.05534	Rnf113a2
0.3017	5.23	0.05556	Gkap1
0.4555	3.25	0.05556	Skp2
-0.7626	5.428	0.05556	Ppia
-0.6153	2.152	0.05556	Tmem251
-0.2517	7.126	0.05556	Parvg
0.6557	4.114	0.05556	Mmp14
0.4255	3.475	0.05556	Fam151b
0.2939	6.241	0.05561	Tom1l2
-0.7688	1.362	0.05561	5930403N24Rik
0.403	3.858	0.05561	Traf3ip1
0.3205	6.468	0.05561	Spopl
0.6784	3.151	0.05571	Irak3
0.2845	5.641	0.05571	Rnf41
0.2588	6.239	0.05571	Gm26510
-0.4583	5.75	0.05571	Gnb2
1.09	3.221	0.05582	Cyb5r1
0.3649	3.967	0.05597	5430405H02Rik
0.2814	6.996	0.05597	Ralgapa1
-0.6882	2.614	0.0561	Mrto4
0.3265	5.237	0.0562	Miga1
1.388	2.369	0.0563	4930405A10Rik
0.4915	5.035	0.05639	Smg9
-1.249	0.2189	0.05643	ENSMUSG00000120049
-1.081	0.7611	0.05646	Gm43672
0.7479	2.45	0.05655	Atp1b2
0.3792	4.616	0.05655	Pdpr
0.3166	5.449	0.05655	Ints6
-0.2872	5.636	0.05658	Trir
0.2642	7.195	0.05676	Map3k2
1.404	2.993	0.05676	Gm10125
-0.3604	6.457	0.05706	Mapre1
-0.2686	7.006	0.05706	Anp32a
0.3066	6.085	0.05706	Nemf
-0.8376	2.529	0.05706	Cnpy4
-0.7807	1.772	0.05706	Med29
0.3936	4.225	0.05706	Zfp568
0.2825	6.556	0.05706	Bckdhb
-0.3893	6.276	0.05706	Csnk1g3
-1.387	1.955	0.05706	ENSMUSG00000120134
-1.139	0.1244	0.05712	Col10a1
-1.032	0.4918	0.05713	Galntl6
-1.264	2.527	0.05713	Gm14023
-0.2596	6.092	0.05725	Zbtb7a
0.2701	6.616	0.05726	Ube4b
-0.3561	7.61	0.05726	Hnrnpk
-0.4349	4.743	0.05726	Slc25a4
-0.4571	7.128	0.05767	Sat1
0.3236	6.405	0.0577	Osbpl1a
-0.3633	4.99	0.05776	Lyl1
0.3076	5.895	0.05776	Vps39
0.6923	2.935	0.05776	Hacl1
0.2615	6.354	0.05776	Vac14
-1.628	5.188	0.05776	Qsox1
0.3087	5.15	0.05776	Heatr5b
-0.4203	7.167	0.05776	Arl6ip1
0.6078	2.322	0.05776	Zfp874a
0.2787	5.924	0.05779	Fbh1
0.4883	3.998	0.05779	Zbed4
-0.7796	2.086	0.0578	Prr5
0.3311	9.387	0.05785	Tns3
0.3075	6.523	0.05789	Dmtf1
0.6581	2.955	0.05789	Ccdc163
0.3176	6.394	0.0579	Ccdc88a
0.295	7.51	0.0579	Pign
-0.6031	2.007	0.0579	Ap5s1
-2.076	0.3166	0.0579	ENSMUSG00000120147
-0.856	2.7	0.05792	Prkcz
0.3033	6.628	0.05803	Tmem87b
-0.3185	4.952	0.05811	Tollip
-2.73	2.287	0.05811	Gm44257
-0.5818	3.366	0.05811	Oat
0.3542	4.63	0.05811	Ice2
0.3629	4.821	0.05821	Cnksr3
0.8021	1.887	0.05822	2500004C02Rik
0.9845	2.522	0.0583	BC051142
-0.6337	4.128	0.0583	Pirb
-1.4	0.3332	0.0583	Gpa33
0.5839	3.791	0.0583	2900076A07Rik
0.3347	9.123	0.05835	Lhfpl2
-0.7484	2.337	0.05835	Samd1
-0.3234	9.262	0.05835	Kctd12
0.3175	5.971	0.05849	Krit1
-2.225	3.187	0.05861	Cacng8
0.3996	4.494	0.05863	Chd1l
0.3314	7.032	0.05865	Rufy3
-0.6604	5.307	0.05865	Tgif1
-1.007	1.07	0.05865	Gm13008
-0.2585	6.158	0.05869	Rab11a
-0.4916	3.529	0.0587	Ndufs8
0.6396	2.694	0.05895	Ift122
0.28	7.348	0.05895	Mia2
0.2771	6.603	0.05902	Fnbp4
-0.6742	2.842	0.05908	Gm7964
0.6298	3.146	0.0591	Camk2a
2.517	3.366	0.05937	Ston1
-0.3398	7.809	0.05956	Ehd4
0.8958	1.786	0.05962	Gm17382
0.5387	4.985	0.05962	Foxn2
0.2905	8.157	0.0598	Znrf2
2.521	0.1046	0.05996	Gm19519
-0.4705	4.757	0.05996	Tspyl1
-0.9743	7.27	0.06006	Slc2a5
-0.259	7.283	0.06024	Hdlbp
0.3561	4.593	0.06024	5730480H06Rik
-0.4158	4.417	0.06026	Rbm42
1.32	0.4109	0.06026	Dcdc2b
0.4098	8.189	0.06026	Cdk14
-0.3815	4.078	0.06082	Acads
0.3378	5.837	0.06082	Firre
-0.4138	4.109	0.06082	Dr1
-0.4462	4.813	0.06089	Adprh
0.4264	3.173	0.06103	Zfp971
-0.3601	6.327	0.06103	Ipo9
-0.4538	7.417	0.06103	Itm2c
0.2321	6.285	0.06109	Esyt2
-2.293	1.105	0.06109	ENSMUSG00000119946
0.3716	4.308	0.06114	Abhd18
0.3673	5.674	0.06114	Smad5
1.05	1.175	0.06114	Rpgrip1
1.298	3.754	0.06129	Acsf2
-0.3693	6.599	0.06134	Tlr4
0.4043	3.986	0.06136	Thap4
0.338	4.525	0.06136	Plekha8
0.4083	4.879	0.06136	Cenpo
0.2284	6.915	0.06136	Mib1
-0.2732	7.854	0.06171	Edem1
-2.271	2.915	0.06171	Adamts1
-0.5446	16.89	0.06178	Rn18s-rs5
-1.209	1.083	0.06193	ENSMUSG00000120684
0.2799	7.788	0.06193	Fam193a
0.5235	3.319	0.06198	Bbs2
0.6813	3.4	0.06209	Gm40466
-0.2959	6.593	0.06209	Arhgdib
-0.3019	4.722	0.06209	Mtfr1l
0.7005	2.326	0.06209	D330041H03Rik
0.3719	7.423	0.06209	Epsti1
-0.5057	3.852	0.06209	Ubl5
-0.6479	3.687	0.06209	Dynll1
-0.3878	4.332	0.06209	Isca1
-0.6153	2.913	0.06209	Trappc1
0.2739	5.744	0.06209	Parp4
0.284	7.259	0.06209	Ogt
-0.8435	1.17	0.06209	ENSMUSG00000121251
-1.906	0.9126	0.06209	Ralyl
0.7426	1.949	0.06209	ENSMUSG00000120183
-0.3274	4.758	0.06209	Eloc
-0.6615	2.984	0.06209	Tmem276-zftraf1
0.4514	5.685	0.06209	Lpin1
-1.115	0.4129	0.06209	Clec1b
0.329	7.142	0.06209	Cop1
0.4118	3.841	0.06209	Chek2
-1.145	3.623	0.06209	Tlcd2
-0.2508	8.325	0.0622	Tpm3
0.2622	5.834	0.0622	Csnk2a2
0.2284	7.03	0.0622	Ylpm1
0.2937	6.927	0.0622	Wdr7
-0.3891	5.267	0.06221	Slc39a10
-0.3749	6.787	0.06227	Pals2
0.4652	5.653	0.06227	Hace1
-0.2721	7.333	0.06228	Stat3
-0.3121	7.596	0.06228	Clip1
-1.247	0.1964	0.06238	Dlgap2
0.2762	5.821	0.06238	Rad50
-0.6939	6.93	0.06239	Klf7
-0.412	5.732	0.06239	Erf
-0.4738	5.036	0.06258	Selenos
-1.118	3.789	0.06258	Myc
-0.3912	5.462	0.0627	Zkscan1
0.2856	7.458	0.06272	Aff1
-4.145	0.6267	0.06273	Ang4
0.2332	7.422	0.06282	Vps13d
-0.3758	4.999	0.06282	Chmp1b
2.054	2.033	0.06283	Tubb2b
0.314	5.663	0.06298	Atg4c
0.293	5.403	0.06309	Tasp1
0.3242	4.806	0.06309	Brd9
-0.6344	4.09	0.06309	Jam3
-1.251	2.85	0.06309	Ighd
-1.486	1.49	0.06318	Adamts17
0.2872	6.816	0.06337	Ranbp9
-0.4313	6.959	0.06343	Rel
0.3358	6.122	0.06344	Oip5os1
0.6956	4.414	0.06362	Hacd4
-1.615	3.11	0.06362	ENSMUSG00000120030
-0.4447	4.444	0.06362	Cetn3
0.8962	1.804	0.06377	Tle2
-1.141	1.174	0.06377	Gm56077
-0.5513	3.484	0.06385	ENSMUSG00000120144
0.3926	3.716	0.06385	Ss18l1
-0.5608	4.643	0.06386	Gm21988
0.4708	3.434	0.06398	Slc25a19
3.055	6.851	0.06407	Nrp1
-0.2599	8.448	0.06407	Actr2
-0.9837	2.838	0.06423	Gm37876
0.5838	6.885	0.06425	Tbc1d8
0.3539	4.678	0.06425	Actr8
0.2667	6.373	0.06429	Ranbp10
-0.4848	4.342	0.06456	Paqr3
-0.4881	5.162	0.06481	Selenok
-0.5852	7.774	0.06487	Slc15a3
-0.4304	4.336	0.06487	Enoph1
-0.7855	4.613	0.06519	Naaa
0.3528	4.829	0.06528	Cir1
-1.757	0.7664	0.06528	4933424G05Rik
0.9206	1.048	0.06528	Gm10863
1.11	2.596	0.06547	Pstpip2
-0.7629	3.099	0.06547	Gm54867
0.3714	4.292	0.06552	Trub1
-0.6228	3.464	0.06552	Ptp4a1 - ENSMUSG00000026064
-0.9669	3.747	0.06558	Csrnp1
0.2959	5.75	0.06558	Atm
0.3306	4.872	0.06559	Meaf6
0.2963	5.81	0.06595	Dennd4c
0.9425	3.932	0.06607	H2-M3
-1.078	1.76	0.06613	Bex3
0.664	3.391	0.06621	Bphl
2.02	1.987	0.06643	Enpp4
-0.4995	4.928	0.06643	Mgat2
0.3482	5.198	0.06643	Akt2
-2.763	0.07161	0.06643	ENSMUSG00000120586
-0.2775	8.49	0.0666	Ptgs1
0.2836	7.116	0.06673	Slf2
3.506	-1.223	0.06673	Skint3
-0.3333	5.01	0.06682	Tm7sf3
-0.4304	4.835	0.06682	Rab32
-0.2762	5.041	0.06682	Ppp2r1a
-0.5785	2.751	0.06687	Itgae
-0.5294	3.547	0.06687	Trappc4
-1.356	4.013	0.06687	Nr4a1
-0.3201	6.956	0.06687	Prkar1a
0.3549	5.797	0.06687	Zfyve26
0.2902	6.625	0.06687	Itpk1
-0.3695	8.348	0.06687	Eif4g2
0.266	5.43	0.06687	Nvl
0.8192	1.627	0.06687	Zfp273
-1.017	0.7025	0.06691	Sh2d1b1
0.4902	3.246	0.06691	Gm21811
0.2945	7.226	0.06691	Pbx3
-0.8941	0.4681	0.06691	Gm37851
-1.177	0.4708	0.06691	Gm15706
-1.557	4.074	0.06691	Ccrl2
-0.5432	3.538	0.06691	R74862
-0.4664	3.924	0.06691	Srp9
0.7052	5.389	0.06691	mt-Nd4
0.232	6.291	0.06691	Rc3h2
0.4135	4.646	0.06691	Pms1
-0.703	3.793	0.06691	Gm20186
1.882	3.495	0.06691	Akr1e1
0.3336	4.867	0.06691	Ankrd26
-1.045	1.287	0.06691	ENSMUSG00000120188
-0.3302	5.402	0.06691	Cggbp1
0.3896	5.246	0.06691	Anks3
0.8792	1.811	0.06698	Ocln
-0.7973	1.323	0.06713	Mageh1
-0.5524	4.192	0.06716	Cebpb
0.2805	5.6	0.06722	Atr
-0.3057	5.648	0.06741	Snx20
0.6835	2.437	0.06746	Aldh1l2
-0.6079	3.78	0.06746	Ndufa4
0.6038	2.228	0.06748	Gm42549
-1.485	4.437	0.06748	Ppp1r15a
1.161	3.581	0.06748	Lilra5
-1.036	3.661	0.06748	Notch4
0.302	6.095	0.06748	Ric8b
-0.4892	5.482	0.06748	Tmed9
0.3032	6.25	0.06748	Prkdc
-0.4011	5.383	0.06748	Txlna
-0.6932	2.203	0.06748	ENSMUSG00000121275
0.7206	1.736	0.06748	Gins3
-1.509	2.441	0.06748	ENSMUSG00000120673
-0.578	2.314	0.06748	Pramel12
1.056	2.463	0.06748	Mirt1
0.262	7.648	0.06748	Senp2
0.2771	4.895	0.06748	Ttc9c
-0.5049	3.586	0.06787	Rbm15b
-0.2897	4.839	0.06821	Sidt2
0.237	6.471	0.06821	Smox
-1.031	1.331	0.0683	Ccl2
-0.4207	3.533	0.06846	Ost4
0.2415	6.831	0.06846	Mga
0.5658	5.322	0.06846	Mcur1
0.432	4.087	0.06867	Timm9
1.209	2.077	0.06867	Slc25a21
-0.6247	3.786	0.06883	Nabp1
-0.6378	3.053	0.06913	Ebpl
-0.2745	6.344	0.06913	Map7d1
0.3395	5.118	0.06949	C2cd5
0.3258	4.914	0.06953	Ccdc91
-0.4483	5.425	0.06953	Drg1
-1.219	0.3493	0.06953	Gm2848
-0.488	2.853	0.06953	Zfp429
1.182	0.8187	0.06953	Map9
0.6498	8.221	0.06953	Tbc1d9
-0.4992	7.444	0.06953	Wsb1
0.5914	2.48	0.06953	Lins1
-2.393	2.98	0.0696	Pianp
-1.594	5.867	0.06963	Atf3
0.4987	4.372	0.07007	Podn
-1.547	2.733	0.07007	Ier2
0.4703	4.881	0.07035	Meis1
-0.3599	4.309	0.07066	Adh5
0.4336	5.725	0.07087	Zc3h12c
0.7793	4.908	0.071	Catspere2
0.3438	4.353	0.07104	Zfp444
-0.7978	2.062	0.07104	Rrad
-0.4191	3.557	0.07104	Pnpo
-1.733	1.688	0.07104	ENSMUSG00000120435
0.3502	4.732	0.07104	Tbc1d24
-1.189	1.808	0.07104	Art3
-0.3527	8.877	0.07104	Fam102b
0.4081	5.743	0.07113	Cd48
0.5568	4.189	0.07113	Slc2a3
0.6832	2.705	0.07114	Pygl
-1.557	0.257	0.07125	Cabyr
0.2143	8.469	0.07129	Cd33
-0.8753	3.344	0.07135	Gm44686
0.2257	7.355	0.07135	Kdm2a
-0.3794	5.621	0.07135	Cnpy3
0.3609	6.429	0.07135	Zfp950
0.3738	4.732	0.07145	Trim5
-1.437	0.4852	0.07145	D830025C05Rik
-0.4757	4.605	0.07145	ENSMUSG00000120081
-0.4172	6.582	0.07168	Usp6nl
0.5438	2.808	0.07171	Gm15952
0.4454	4.212	0.07184	Trmt6
0.2986	6.178	0.07184	Atp6v1h
0.2299	7.829	0.07184	Cnot4
0.4762	4.657	0.07189	Mthfd1l
0.5037	6.975	0.07189	Rassf4
0.2734	7.525	0.07189	Vps54
1.137	2.166	0.07189	Cers4
0.252	6.973	0.07189	Kidins220
0.2612	6.523	0.07192	Gpbp1
-0.3464	6.356	0.07192	Usp2
0.3362	9.531	0.07209	Arhgap22
0.3132	4.618	0.07217	Ibtk
0.3766	8.901	0.07238	Man1c1
-0.4219	5.084	0.07243	Pcyox1
-0.4344	4.437	0.07243	Ppp1r11
0.57	2.877	0.07243	4931414P19Rik
-1.491	0.5121	0.07243	Tmem51
-0.3283	3.995	0.07243	Bpnt1
0.4681	5.099	0.07243	Scarb1
-0.643	2.086	0.07277	Hmbs
-0.61	1.984	0.07279	Dnajc30
-0.8043	1.206	0.07297	1810055G02Rik
-0.6765	3.492	0.07297	Oaf
0.4906	5.822	0.07297	Parp9
-2.22	3.751	0.07297	Angptl7
-0.3457	5.748	0.07297	Snx3
-0.3825	4.044	0.07297	Gnl3l
0.2903	4.987	0.07297	Pold3
0.4494	5.559	0.07309	Mbd2
-0.6496	2.548	0.07309	Spr
-0.6318	3.792	0.07309	Irf2bp1
-0.2517	8.083	0.07309	Nptn
-1.329	0.4899	0.07309	Gm35330
0.5163	4.434	0.07309	Pml
0.3047	6.526	0.07325	Manba
-0.2794	5.848	0.07333	Vps33a
0.2257	7.571	0.07333	Spag9
0.2772	5.918	0.07333	Ccdc82
-0.9033	3.423	0.07333	Sgsh
-0.2878	5.382	0.07333	Atxn7l3b
0.2343	7.615	0.07357	Rbm26
-0.2999	7.615	0.07357	Rab3il1
0.5456	3.255	0.07368	A530088E08Rik
-1.352	0.02438	0.07382	ENSMUSG00000120743
-0.661	2.383	0.07382	Ptrhd1
0.759	8.304	0.07386	Rtn4rl1
-0.2784	7.234	0.07386	Rab1a
-1.253	0.8895	0.07386	ENSMUSG00000120462
-0.6725	2.265	0.07392	H2-Oa
0.2394	7.174	0.07417	Ago3
0.2508	6.669	0.07417	Kif16b
-1.012	2.426	0.07417	Plekha4
0.2922	5.693	0.07431	Tyk2
-0.3037	11.24	0.07431	Maml3
-0.3015	5.001	0.07431	Hmgcl
0.2743	6.63	0.07436	Slc30a9
0.3653	3.993	0.07441	Slc17a9
-0.5033	5.038	0.07457	Mdh1
0.5329	5.895	0.07468	Liph
-0.5964	4.321	0.07483	Nfkbib
-0.6696	7.997	0.07483	Hspa5
0.4313	3.299	0.07493	Abcb10
0.2264	6.254	0.07514	Csnk2a1
0.2921	4.725	0.0752	Ndor1 - ENSMUSG00000006471
0.2234	7.232	0.07522	Chchd3
-1.792	-0.05653	0.07522	ENSMUSG00000119957
0.2679	7.397	0.07522	Lrch3
0.471	3.244	0.07527	Klhl42
-0.2643	5.565	0.07538	Klhl9
0.3783	4.728	0.07538	Kctd3
0.393	3.932	0.07555	Fbxo32
-1.448	4.025	0.07564	ENSMUSG00000121207
0.3862	5.398	0.07566	Gm20732
0.2723	6.864	0.07566	Rc3h1
0.3228	4.203	0.07571	Nsun4
0.3802	5.221	0.07571	Phtf1
-0.8447	2.816	0.07581	Gm9725
0.2164	7.244	0.07581	Arfgef1
-0.9243	2.101	0.07581	Gimap9
1.045	2.743	0.07581	Pvrig
0.2701	6.051	0.07581	Ufl1
-0.8679	2.415	0.07581	Nox1
-0.7541	0.9507	0.07585	Gm20663
0.4454	3.494	0.07585	Malsu1
-2.425	-0.6862	0.07585	Pira12
0.2474	5.828	0.07585	Tsc1
-0.5674	3.676	0.07635	Rfk
-0.5932	2.772	0.07635	Cyb561d1
-0.354	4.873	0.07663	Rab1b
0.2977	4.772	0.07684	Timm44
0.265	6.659	0.07686	Xpo7
0.3693	5.092	0.07686	Ncapd3
0.3118	4.913	0.07698	Txnrd2
-0.3213	7.073	0.077	Mapre2
0.4242	9.466	0.077	Mitf
-2.128	0.1945	0.077	Hal
0.3491	5.687	0.07714	Narf
-0.7193	3.46	0.07725	Patl2
-0.5435	3.364	0.07735	Hmga1
-0.4274	3.577	0.07736	Rcc1
-0.4999	4.267	0.07736	Rabac1
0.5013	5.44	0.07738	Gpr160
-0.731	2.888	0.07746	Tmem60
-0.3405	4.017	0.07757	Tmem167b
0.3396	5.75	0.07759	Strbp
-1.62	0.5239	0.07765	ENSMUSG00000120240
0.2515	6.203	0.07834	Brd7
-0.7153	2.786	0.07834	Pde12
0.5945	6.921	0.07835	Cers6
-0.536	2.89	0.0784	Tipin
-1.303	1.746	0.0784	2310010J17Rik
-1.131	1.458	0.0784	Rpp38
-0.6841	1.51	0.0784	Gm20492
0.887	0.7431	0.0785	Exd1
-1.247	0.531	0.0785	Ltb
-0.3816	6.989	0.0785	Eif4a1
0.3063	4.912	0.0785	Cryzl1
0.3862	3.086	0.0785	Mettl2
-0.3517	4.584	0.0785	Bend6
0.4504	3.3	0.07854	Bloc1s2
0.3269	5.802	0.07894	Mob2
0.3734	6.818	0.07897	Gm33989
0.3039	6.84	0.07897	Aagab
-0.2341	6.648	0.07924	Clstn1
-0.6215	6.793	0.07924	Ralgps2
-0.6786	2.216	0.07924	Mrpl36
0.2776	7.578	0.07924	Mon2
-0.4149	3.589	0.07924	Gm26759
-0.8348	1.967	0.07931	ENSMUSG00000121177
0.7856	1.994	0.07935	Foxp4
-0.2815	8.513	0.07935	Abi3
0.3478	5.399	0.07935	Mtmr14
-0.7975	2.402	0.07937	Nhp2
-0.5824	3.465	0.07937	Pithd1
-0.325	5.139	0.07967	Leprotl1
-0.4367	5.059	0.0797	Nsun6
-0.961	2.485	0.0797	Lipc
-1.887	1.717	0.07976	Tamalin
0.3311	5.261	0.07983	Ubap2
-0.3755	7.697	0.07989	Adgrg1
0.2863	5.313	0.07989	Brwd3
-1.26	1.58	0.07989	A630001O12Rik
-0.6033	2.962	0.07989	Mrps14
-0.3597	6.909	0.08011	Litaf
-0.5414	2.858	0.08028	Coasy
-0.3782	4.587	0.08028	Rnf34
-0.393	5.757	0.0803	Ppp1r2
-0.3727	4.997	0.08031	Grsf1
-0.7887	3.056	0.08035	A930024E05Rik
0.3165	4.527	0.08042	Coq8b
1.128	1.22	0.08065	4930447K03Rik
-0.4602	7.997	0.08072	Rhob
0.31	5.208	0.08099	Mrs2
0.2989	5.599	0.08099	Apaf1
-1.361	0.2047	0.08108	Gm11769
0.4293	4.473	0.08108	Uap1
0.2523	6.14	0.08108	Anapc1
0.2972	5.672	0.08108	Ctdspl2
0.3305	5.906	0.08108	Wipf2
-0.299	5.558	0.0812	Nras
0.25	7.042	0.08142	Pik3ca
-0.2916	5.588	0.08149	Dyrk2
0.4707	3.915	0.08182	2700097O09Rik
0.3084	4.796	0.08182	Dedd
0.2602	7.292	0.08196	Dis3l2
0.3781	4.324	0.08196	Mrps15
1.271	0.1791	0.08196	Pbx4
0.2844	5.023	0.08196	Ttf1
0.9261	0.2762	0.08214	Ube4bos1
-0.6599	1.958	0.08214	Thnsl1
0.3412	7.061	0.08219	2210408I21Rik
-0.3858	4.137	0.08236	B4galt3
-1.643	0.3561	0.08236	4930589O11Rik
1.215	0.4565	0.08236	Prelid3a
0.2459	5.472	0.08236	Gbgt1
-0.2911	6.322	0.08246	Rad21
0.2933	4.8	0.08248	Eif2b3
-0.2854	5.129	0.08248	Syap1
-0.4596	9.036	0.08251	Hsp90b1
0.4225	4.319	0.08251	Cnep1r1
1.206	3.278	0.08251	Tubb2a
0.2758	5.238	0.08251	Cep135
-0.531	1.992	0.08277	Exosc4
-0.6592	2.746	0.08278	Grid2
0.2892	10.26	0.08291	Dst
0.2507	5.804	0.08308	Dcaf6
2.974	4.62	0.08308	Ppfia4
0.2982	4.888	0.08321	Uhrf1bp1l
-0.4686	4.93	0.08325	Hmgn1
0.6286	2.992	0.08329	Gm13031
-2.111	2.052	0.08347	ENSMUSG00000120357
-0.4475	3.75	0.08348	Naf1
-0.4647	5.912	0.08348	Slc25a5
0.9019	1.923	0.08348	Dnaaf3
0.2829	6.807	0.08369	Sfswap
-0.3147	4.91	0.08369	Psma7
-0.4136	3.327	0.08407	Tinf2
-0.9773	1.599	0.08407	Smim35
0.3467	4.046	0.08415	Tada2a
-0.3058	8.272	0.08419	Snx13
0.2249	6.124	0.0842	Ubxn7
0.4883	4.581	0.08425	Sass6
0.2356	6.705	0.08427	Camsap1
-0.4711	4.893	0.08432	Naa20
0.3289	6.827	0.08432	Fam219a
-0.3494	4.415	0.08438	Cops7a
-0.4109	5.977	0.08442	Pcbp1
0.7171	1.675	0.08452	Slc6a1
0.2955	4.447	0.08462	Prkci
0.237	6.778	0.08481	Pds5b
-0.6421	1.776	0.08481	Dohh
-1.513	0.8069	0.08481	Gm48102
-0.8754	1.195	0.08481	Marchf10
0.3127	5.248	0.08481	Slf1
-0.8874	1.261	0.08481	Hps6
-0.6471	2.923	0.08481	Fzd7
0.9747	0.5961	0.08507	Oas1c
-0.7815	3.036	0.08522	Or5v1
-0.2593	6.603	0.08531	Ldhb
0.2588	6.586	0.08533	Pspc1
0.2903	5.109	0.08538	Mtpap
-0.921	1.031	0.08543	Mad2l1bp
-1.227	6.435	0.08543	Ctnnd2
0.438	3.356	0.08612	Tfb1m
-1.043	0.4413	0.08612	Peak1os
-0.8115	0.8821	0.08613	Hecw2
-0.3155	6.423	0.08613	Magt1
0.2547	6.915	0.08622	Traf5
-1.016	0.8096	0.08622	Rspo1
0.4544	5.491	0.08642	Parp12
-0.4784	9.8	0.08644	Selplg
-0.3098	5.63	0.08644	Sash3
0.3201	5.403	0.08644	Zfyve16
1.701	4.598	0.08644	Rpph1
-0.2968	3.994	0.08646	Dda1
-0.4766	2.494	0.08646	Thap1
0.2355	6.927	0.08646	Vps8
0.4718	3.708	0.08646	Nudcd1
-0.5883	2.708	0.08646	Atp5g1
-0.2656	5.715	0.08646	Flii
-2.853	0.4755	0.08646	B230206L02Rik
-0.3152	4.756	0.08667	Pgrmc1
-0.6588	2.402	0.08667	Tceal1
0.2613	6.931	0.08667	Srek1
-0.2462	7.345	0.08667	Camk1
-0.3694	4.292	0.08687	Tor4a
-0.3554	6.559	0.08688	Cnbp
-0.5557	2.544	0.08688	Eid2b
0.3052	5.253	0.08748	Zbtb44
0.47	2.664	0.08748	Acot7
-0.6895	1.989	0.08749	0610009B22Rik
0.3209	3.994	0.0875	Caml
-0.6861	1.836	0.0875	4921531C22Rik
0.4097	4.079	0.0876	Tamm41
-0.419	5.84	0.08808	Per1
-0.2594	6.041	0.08826	Arl6ip5
-0.4937	3.543	0.08829	Batf
0.2623	7.276	0.08834	Pias2
-0.4989	7.778	0.08834	Ptpro
0.4403	6.115	0.08834	Tspan5
0.7959	4.64	0.08882	Fyn
0.2724	5.565	0.08885	Farsb
0.2539	6.314	0.08885	Med27
-0.3396	5.508	0.08896	Ctbp1
1.45	0.754	0.08899	Tnni3
0.2759	7.16	0.08911	Atad2b
-0.4843	5.257	0.08911	Tnfrsf13b
0.452	2.993	0.08911	ENSMUSG00000120789
-0.3456	4.208	0.08911	Mepce
0.3114	4.857	0.08914	Fbxl12
0.833	2.862	0.08915	Ptpn22
0.5173	2.671	0.08928	Acp1
-0.2715	6.977	0.08928	Hnrnpl
0.5	3.611	0.0894	6820431F20Rik - ENSMUSG00000071796
-0.8617	1.253	0.08968	Gm34983
0.2078	6.55	0.08972	Zfp207
-0.7762	2.743	0.08994	Adtrp
0.2459	5.727	0.08994	Gon4l
-2.889	-0.652	0.08994	ENSMUSG00000120201
-0.843	1.135	0.09015	Ss18l2
0.2209	6.181	0.09015	Camta2
-0.3401	7.906	0.09024	Rasal2
0.3217	6.419	0.09024	Kdm3a
0.2419	6.601	0.09055	Gpatch2
-0.3875	5.596	0.09067	Ano10
0.2256	6.658	0.09067	Cyld
-0.289	5.433	0.09067	Dnaja2
-0.5029	2.795	0.09109	AI467606
-0.8006	2.802	0.09109	Gm41611
-0.541	2.858	0.09109	Sra1
0.2743	5.727	0.09109	Khdc4
0.3377	6.355	0.09109	Tardbp
-0.7312	2.821	0.09109	Dab2ip
-0.7517	2.688	0.09115	ENSMUSG00000121168
-0.4656	4.287	0.09115	Usp11
3.011	1.365	0.09115	Gm42031
-0.4661	2.514	0.09115	Mrpl28
-0.4144	4.963	0.09115	Denr
0.6079	1.85	0.09115	Gnb5
-1.086	6.662	0.09115	Rasgef1b
0.7612	3.929	0.09129	Ccdc61
-0.6842	1.937	0.09167	Tstd3
0.5878	2.298	0.09175	ENSMUSG00000120747
0.3361	3.588	0.09182	Adprm
-0.6323	1.733	0.09182	Bola3
-0.3818	3.738	0.09204	Batf3
1.142	0.4708	0.09204	Tmem47
0.2427	7.248	0.09206	Insr
-0.5709	3.424	0.09208	Hypk
0.4883	3.158	0.0922	Pik3c2b
-0.7206	1.931	0.09226	Tprn
-1.004	0.977	0.09235	Cfhr2
0.2435	7.147	0.09238	Synj1
-0.2933	6.292	0.09256	Dcakd
-1.732	4.295	0.09271	Dusp1
-0.5575	1.919	0.0931	4731419I09Rik
-0.3303	6.38	0.0931	Ssr1
-0.3172	5.977	0.0931	Cops4
-0.7074	2.846	0.0931	Gm37229
0.3501	4.707	0.0931	Fbxl19
0.2016	6.75	0.0931	Lrpprc
0.3231	5.987	0.09323	Metap1d
-0.398	6.042	0.09324	Tmem86a
-0.3108	6.386	0.09324	Fes
0.2153	5.851	0.09324	Prmt3
-0.3127	6.347	0.09324	Zbtb18
-0.9358	1.583	0.09324	Gadd45g
-0.664	7.628	0.09324	Cd164
0.3866	3.581	0.09328	Slc41a1
-0.3394	8.036	0.09328	Disc1
0.2067	10.03	0.09328	Diaph2
-0.4875	3.884	0.09328	Zfp622
-0.4901	4.468	0.09328	ENSMUSG00000121007
0.911	4.245	0.09337	Septin9
-0.263	7.814	0.09358	Daglb
0.4243	3.958	0.09358	ENSMUSG00000121051
-0.2873	5.883	0.09362	Uba1
0.2509	6.786	0.0938	Arglu1
4.44	0.1282	0.0938	Ifi213
-1.484	2.438	0.0938	Rcan2
0.3977	4.957	0.09384	Parp6
-0.9223	2.953	0.09393	Gm55604
0.254	5.576	0.09404	Capn7
0.2756	6.128	0.09404	Mysm1
1.828	3.652	0.09404	Ccnb1ip1
-0.8109	1.226	0.09415	Gm37401
-0.894	0.3254	0.09434	Dscam
0.3051	4.045	0.09435	Phkg2
-0.4523	5.425	0.09465	Ppib
0.2718	6.988	0.09491	Ncoa1
0.2511	6.558	0.09518	Vps50
0.8792	1.87	0.09518	Fam107a
-1.115	0.3015	0.09521	Gm11175
-1.065	0.4516	0.09521	Neurl2
-0.2977	5.158	0.09576	Sar1a
0.374	3.401	0.09576	Cep44
0.4134	4.07	0.09577	Fbxo9
0.2404	6.747	0.0959	Pibf1
0.3265	5.045	0.09594	Pde6d
0.4463	3.808	0.09594	Crebl2
-1.013	1.862	0.09594	0610009L18Rik
1.09	0.5854	0.09594	Atad3aos
0.2797	4.691	0.09594	Dgcr8
0.2476	5.282	0.09594	Ndufaf2
-0.2635	5.693	0.09594	Wbp2
-0.909	0.4788	0.09594	Fmc1
-1.063	2.003	0.09621	H1f3
-0.5402	2.35	0.09621	Smim12
-1.045	0.6101	0.09626	Pkn3
0.8707	1.599	0.0963	Gm15991
0.8837	1.401	0.0963	Impa2
-0.7893	2.067	0.09641	Gm50399
-0.5788	4.559	0.09644	Clec4a2
0.2225	7.694	0.09645	P2ry6
-0.5478	3.989	0.09645	Gpx4
-0.6257	1.369	0.09645	Ndufaf8
0.4221	3.369	0.09645	Fastkd1
0.2656	6.319	0.09666	Lonp2
0.2477	4.991	0.09669	Ssbp1
-0.3225	6.936	0.09686	Lrrc3
-0.7891	3.831	0.09686	Gm37352
0.2423	5.83	0.09694	Ddx10
-0.5628	5.064	0.09695	Ifrd1
-1.044	1.539	0.09805	Gm14636
0.4763	3.24	0.09825	Satb2
0.9004	0.2725	0.0986	4933424L21Rik
0.2364	7.499	0.09871	Usp15
-0.3717	7.668	0.09871	Ywhah
0.2226	6.759	0.09873	Relch
-0.9533	5.85	0.09876	Nfkbiz
-0.5917	3.685	0.09897	Rpl15
-1.123	0.8709	0.09906	Gm47863
-0.294	8.019	0.09911	Ubl3
-1.945	0.7581	0.09962	Gm28707
0.4387	4.746	0.0997	Agpat5
-0.7694	2.702	0.1002	Gm28981
-1.447	0.5329	0.1004	ENSMUSG00000120025
-0.9228	0.9781	0.1004	Catsper3
-0.3377	3.805	0.1004	Ilf2
1.506	2.073	0.1004	Zfp993
-1.29	1.393	0.1004	ENSMUSG00000120387
0.2736	6.237	0.1004	Arhgef7
0.6641	2.03	0.1004	Gm21781
-0.4269	3.37	0.1004	Ebp
0.2821	5.299	0.1004	Hmgxb3
-0.2042	8.073	0.1004	Snx5
0.2569	4.864	0.1004	Insig2
-0.3088	8.067	0.1005	Fcgr3
0.5086	2.216	0.1005	Ppp2r5b
0.2321	5.796	0.1005	Inpp5k
-1.251	0.472	0.1005	Prr7
0.2656	6.148	0.1005	Arih2
0.3483	5.014	0.1005	Cpeb3
-0.8985	2.169	0.1005	Gm37305
-0.3399	4.994	0.1005	Zfp40
0.2345	6.861	0.1005	R3hdm1
0.2596	5.171	0.1005	Zfp369
0.2232	8.971	0.1005	Cmip
0.2522	7.158	0.1005	Syngr1
-0.8361	0.9659	0.1006	ENSMUSG00000121211
1.122	0.7092	0.1006	Stk39
0.3141	5.811	0.1007	Ddx31
-1.558	2.367	0.101	Ier3
-0.8917	0.4535	0.101	Thbs2
-0.5709	6.821	0.101	Mapkapk2
-0.45	4.091	0.101	Gm15850
-0.509	3.876	0.1011	Gng5
-0.6509	2.953	0.1012	Tmem258
-0.5583	6.342	0.1012	Nlrp3
0.6773	3.262	0.1012	Gfod2
0.6294	2.185	0.1013	Aldoc
0.4709	3.495	0.1013	Xntrpc
0.2658	5.754	0.1013	Exoc3
0.3479	4.073	0.1015	Fra10ac1
0.332	7.915	0.1015	Pwwp2a
0.3465	3.583	0.1015	Wdr76
-0.6256	1.155	0.1016	Gm17092
0.4968	4.8	0.1016	Tmco4
-0.4186	3.539	0.1016	Aip
-0.2912	4.031	0.1016	Fam220a - ENSMUSG00000083012
0.4501	2.47	0.1016	1700029J07Rik
0.3993	3.558	0.1016	9430015G10Rik
0.7576	1.597	0.1016	Chst9
-2.214	0.9167	0.1016	Gm4366
-1.033	2.018	0.102	4833438C02Rik
-1.105	4.635	0.1021	Nfkbid
-0.28	5.272	0.1021	Zfp24
-0.4812	5.774	0.1021	Slc25a25
0.7773	1.752	0.1022	Pafah2
0.2839	6.135	0.1022	Ptpn4
0.2386	6.325	0.1022	Riok3
-0.8471	9.239	0.1022	Gm15564
0.5915	4.107	0.1022	ENSMUSG00000120396
-1.083	0.6441	0.1023	Gm16998
0.1973	7.36	0.1025	Rbm33
0.7222	1.629	0.1026	Slc35g1
-1.405	0.6609	0.1028	Gm12148
0.2167	6.434	0.1028	Ino80
-0.4229	3.925	0.1033	Tmx2
-0.7104	3.372	0.1036	Cry1
0.8356	8.421	0.1036	Prkce
0.2699	6.15	0.1037	Shprh
-1.349	0.1683	0.1037	Adgrv1
0.9437	2.34	0.1038	Sh2d6
0.367	4.773	0.1039	Dtd1
0.2225	6.108	0.1039	Upf2
1.487	6.442	0.1039	Niban1
-0.4006	3.811	0.1041	Utp3
0.3482	5.086	0.1041	Clasrp
0.8215	1.14	0.1042	Mir670hg
0.2573	6.398	0.1042	Samhd1
-0.5966	1.805	0.1042	Cdt1
0.3837	4.555	0.1042	Ccdc58
-0.9086	0.9751	0.1042	Tmem203
0.4136	5.85	0.1043	Ypel2
0.4286	4.358	0.1045	Fkbp9
0.486	3.659	0.1046	Rbbp8
0.5059	5.33	0.1046	Mllt6
-0.215	6.356	0.1046	Mfap3
0.6873	1.476	0.1046	Ppp4r4
0.3378	5.372	0.1046	Golga1
0.3577	5.698	0.1049	Stim2
0.4399	3.287	0.105	Hemk1
0.34	4.395	0.105	Echdc1
-0.5133	3.242	0.105	Ndufa8
0.3211	4.968	0.1051	Herc3
0.3517	7.408	0.1053	Osbpl11
-0.4804	5.645	0.1053	Cd14
-0.3607	3.826	0.1054	Map2k3
0.2786	4.836	0.1059	Sanbr
0.406	5.506	0.1059	Sugct
-0.4614	2.689	0.1061	Ranbp6
0.6398	5.501	0.1064	mt-Nd2
0.2672	5.093	0.1067	Edrf1
0.2134	5.555	0.1067	Mapk1ip1
-0.3652	4.325	0.1068	Klk8
-0.2738	4.86	0.1068	Prkaca
-0.5718	9.291	0.1068	Filip1l
-0.3736	4.788	0.1068	Emc7
-0.3135	6.316	0.1069	Selenot
-0.544	2.455	0.1069	Fkbp14
-0.4284	4.955	0.1069	Sh3bp5
0.2999	5.408	0.1069	Luc7l
0.3358	5.346	0.1069	Terf1
0.2738	4.702	0.1069	Rnf8
-0.3579	3.453	0.1069	Tmem106c
-0.3197	7.837	0.1069	Slc16a6
0.3006	4.599	0.1069	Nup160
-0.4951	2.819	0.1069	Nudt16
-0.2805	5.291	0.1069	Sh3gl1
-1.171	0.5877	0.107	Frem2
-0.7574	5.834	0.1072	Plekho2
0.3659	3.583	0.1072	Cep89
-0.8145	0.2046	0.1072	9630028H03Rik
-0.5582	3.552	0.1072	Pvr
0.2566	5.187	0.1072	Cyb5b
0.2882	5.751	0.1072	Dnaaf9
-0.5918	2.278	0.1072	Coa3
-0.777	5.09	0.1072	Ddit3 - ENSMUSG00000025408
-0.679	6.632	0.1072	Bcl2
-0.2411	4.568	0.1072	Flot1
0.4304	4.534	0.1072	Shq1
-0.2518	5.334	0.1072	Slc35c2
-0.2924	5.378	0.1072	Srsf9
0.2459	6.285	0.1074	Mapk8ip3
2.331	4.057	0.1074	2310008N11Rik
-0.556	4.02	0.1074	Ssr2
0.3927	3.259	0.1075	Otud3
1.672	0.4435	0.1075	Gm35572
0.6756	1.792	0.1076	Srp54a
-1.208	1.051	0.1078	ENSMUSG00000120101
-0.5624	1.587	0.1079	Slc5a6
0.4657	2.472	0.108	Gm5141
0.2288	6.816	0.1083	Rlf
-0.2953	6.292	0.1083	Brd2
-0.8781	2.031	0.1084	Cage1
0.2313	6.537	0.1085	Tango2
-0.5542	1.554	0.1085	Lgalsl
-1.082	0.543	0.1086	ENSMUSG00000120402
-0.3648	5.618	0.1086	Dusp3
0.3046	5.062	0.1086	Ccdc191
-0.2508	7.131	0.1087	Sft2d2
0.419	3.423	0.1089	Zbtb10
-0.4974	2.719	0.1092	Dusp10
0.3696	3.89	0.1092	Wdr47
-1.279	0.391	0.1093	Gm43221
-0.8402	3.313	0.1093	Serpinf1
-0.4399	3.75	0.1094	Phkg1
-2.25	0.669	0.1095	Gm19196
-0.5033	3.194	0.1096	Smdt1
-0.2972	6.567	0.1096	1700017B05Rik
0.3389	3.519	0.1096	Mtcp1
0.21	5.989	0.1096	Madd
0.7288	0.6578	0.1096	Mill2
0.2625	7.878	0.1096	Ubn2
-0.9027	1.347	0.1096	Gm36874
-1.495	1.036	0.1097	Kif5a
-0.8183	1.42	0.1097	Map10
0.2838	5.235	0.1097	Elp3
-0.5347	2.756	0.1097	Trmt10c
0.3891	2.994	0.1097	Trp53i13
-0.4	4.666	0.1098	Rnf187
0.2698	6.312	0.1098	Rhot1
0.2358	6.536	0.1099	Slx4ip
-0.3601	4.354	0.1099	Tsen2
-0.7228	1.188	0.1099	B3galt2
0.2479	4.99	0.11	Kifap3
0.561	2.622	0.11	2810429I04Rik
-1.774	-0.2937	0.11	Emilin1
0.3572	6.6	0.11	Slfn8
0.3422	7.071	0.11	Cept1
-0.3919	4.05	0.11	Arpc5l
0.4082	6.568	0.11	Apobec3
-0.6013	1.456	0.11	Pycrl
-0.4626	14.65	0.11	Cmss1
1.315	2.297	0.11	Il12rb2
-0.306	4.819	0.11	Naa12
0.2816	6.368	0.1103	Pkd2
-0.1947	7.892	0.1105	Hck
-0.4107	4.271	0.1106	Zfp729b
-0.3788	5.333	0.1106	Ppm1g
-0.3102	5.016	0.1107	Pomp
-0.2433	5.585	0.1108	Ctso
-0.6504	7.117	0.1109	Ipcef1
0.3126	6.173	0.111	Iffo1
-0.8647	0.3386	0.1111	ENSMUSG00000121163
-0.4333	3.071	0.1112	Haus7
1.001	0.632	0.1112	Fn3k
0.4558	2.729	0.1112	Zfp825
0.4992	6.646	0.1112	mt-Co1
0.5078	3.202	0.1112	Hyi
-0.2373	7.073	0.1114	Irf5
0.2626	5.726	0.1114	Msantd2
1.074	0.4855	0.1114	Fbxo44
-0.9655	1.05	0.1115	Frmd8os
0.2252	7.896	0.1116	Rassf2
0.303	5.979	0.1119	Agap3
0.2828	5.072	0.1119	Zfp280c
-0.2862	5.133	0.1119	Spint1
0.4509	2.757	0.1122	Emc9
0.2579	8.995	0.1122	Ank2
0.7801	3.141	0.1122	Zmat3
-0.2476	8.082	0.1123	Rab31
0.3405	4.41	0.1123	Lipo3
-0.3533	3.87	0.1123	Dok1
-0.1904	7.543	0.1124	Gnb1
2.925	-0.4694	0.1126	Gm15169
-0.3059	5.567	0.1126	Themis2
-0.4593	2.94	0.1126	Gm20089
-0.296	4.629	0.1126	Afdn
-0.4083	4.575	0.1127	Fcgrt
-0.5757	4.058	0.1128	Fam102a
-1.058	0.4428	0.1129	ENSMUSG00000121258
-0.3922	7.077	0.113	Aif1
-0.2845	6.629	0.113	Stau2
0.7732	1.211	0.113	Gm44777
0.4093	2.98	0.113	Gemin8
-0.5811	1.97	0.113	4930578M01Rik
-0.3863	6.222	0.113	Tubb5
-1.107	3.418	0.113	Gm31243
-0.205	6.713	0.1131	Lasp1
-0.4018	6.18	0.1131	Ckb
-0.5145	4.708	0.1131	Rpl18
-4.881	1.915	0.1131	Gm49692
-0.6507	3.545	0.1136	C1qbp
0.351	4.522	0.1136	Brms1l
-0.8794	1.758	0.1136	9430041J12Rik
-0.6401	2.631	0.1136	Smpdl3b
-0.3063	4.73	0.1136	Tmed4
-0.2183	6.562	0.1136	Rlim
-1.652	0.6156	0.1136	Gm43936
0.5927	6.056	0.1136	Ppm1e
-0.4468	5.362	0.1136	Mrfap1
0.2557	4.731	0.1136	Alg2
0.2626	6.077	0.1137	Rfx7
-0.7633	1.328	0.1137	1110038B12Rik
-0.3541	8.918	0.1139	Canx
-0.3164	5.863	0.114	Ids
-0.7037	0.8175	0.114	Mblac1
-0.3527	3.456	0.1141	Rbm38
0.2875	5.827	0.1142	Eya3
0.2154	7.875	0.1142	Tmcc1
-0.4176	3.793	0.1143	Nsmce4a
-1.33	0.22	0.1144	Pard6g
-0.6722	1.831	0.1144	ENSMUSG00000120298
-0.6098	7.056	0.1144	Pea15a
-0.45	3.526	0.1145	1110032A03Rik
0.3747	3.259	0.1145	Tmem38b
-1.023	1.992	0.1145	Tlcd4
-0.2122	5.409	0.1146	Actr1a
-1.149	0.5032	0.1146	Nr4a2
-0.9207	0.566	0.1147	Gm36198
-0.6875	1.777	0.1147	Smim33
0.3743	4.051	0.1148	Pcbp3
-0.7356	0.8664	0.1148	Gm47272
0.2477	6.97	0.1148	Kmt5b
-0.3034	4.489	0.1148	Ei24
-0.5525	3.978	0.1148	Zfp703
[truncated: 55,011 more rows]

## Sheet: DE-5_Microglia
logFC	AveExpr	p_val_adj	gene_names
-6.897	1.314	0.0001926	Cd36
-6.316	0.9424	0.001141	Actr3-ps
-5.83	0.5369	0.0001026	Adgrg5
-5.337	1.387	0.01108	4930519F16Rik
-5.031	1.289	0.003128	Gm29536
-4.974	4.223	0.01211	Gm47283
-4.961	-0.9104	0.0001026	Rpl31-ps21
-4.498	0.441	0.01792	Brinp2
-4.364	0.9258	0.002015	Pcnx2
-4.321	4.769	0.006409	Cd300lf
-4.161	-0.3395	0.0007054	Scml2
-3.927	-0.6426	0.0002577	Pcna-ps2
-3.477	0.4447	0.002636	Gm14584
-3.475	6.56	0.0001026	Nrxn1
-3.473	0.5811	0.002015	ENSMUSG00000119946
-3.4	0.3123	0.04156	B230206L02Rik
-3.333	-0.6108	0.002786	Gm7285
-3.299	0.3592	0.00511	Gm36266
-3.296	2.746	0.01243	Rab37
-3.275	-0.1548	0.01065	Rps7-ps3
-3.196	1.838	0.04534	Gm44257
-3.033	6.025	0.0001367	Nme7
-2.917	1.381	0.0488	Gm55594
-2.788	0.3255	0.01556	1700023H06Rik
-2.479	9.896	3.416e-09	Arsb
-2.427	0.1578	0.0313	Kcnn4
-2.376	3.041	0.02601	Cacng8
-2.296	0.855	0.003619	Glipr2
-2.281	1.544	0.006834	ENSMUSG00000120357
-2.162	0.4122	0.04421	Cfap77
-2.078	2.749	0.01464	9330185C12Rik
-2.028	1.414	0.003347	Zc3hav1l
-2.023	0.5339	0.01673	A530013C23Rik
-2.021	2.386	0.01559	Adamts1
-1.973	1.526	0.01343	Gm44574
-1.936	1.259	0.006983	Gm47448
-1.894	5.211	0.0003731	Sfmbt2
-1.893	0.976	0.03206	A630001O12Rik
-1.872	1.846	0.01612	Gm29282
-1.853	1.555	0.008156	ENSMUSG00000120054
-1.833	1.846	0.003324	Hspa1b
-1.823	3.166	0.004671	Klf2
-1.784	2.093	0.007212	ENSMUSG00000120673
-1.782	2.866	0.006607	Kcp
-1.782	2.274	0.01118	ENSMUSG00000120869
-1.774	1.308	0.03731	1700020L13Rik
-1.771	1.12	0.04754	Mageh1
-1.755	0.9908	0.01305	Zfp457
-1.726	2.954	0.0313	Spry1
-1.709	5.227	0.03891	Qsox1
-1.684	4.52	0.01976	Gm10138
-1.682	1.026	0.01632	Gm47819
-1.67	5.65	0.007428	Alox5
-1.66	1.502	0.006188	ENSMUSG00000120371
-1.643	0.5877	0.03586	Nrarp
-1.615	4.499	0.0459	Cd52
-1.598	5.583	0.0001026	Ubc
-1.571	0.9811	0.02916	Il1r2
-1.568	1.725	0.01647	Hspa1a
-1.566	1.404	0.03047	Platr29
-1.565	1.402	0.02507	ENSMUSG00000120546
-1.559	1.302	0.04058	Gm34455
-1.53	1.491	0.02481	Gm9484
-1.527	2.541	0.0109	Ccdc102a
-1.52	2.363	0.01097	Gm5420
-1.499	5.109	0.03474	Atf3
-1.491	0.7252	0.0348	Ccnd2
-1.488	5.6	0.03123	Rgs1
-1.478	1.805	0.01693	Klf4
-1.472	2.103	0.005478	Nox1
-1.471	0.8877	0.04402	ENSMUSG00000120430
-1.464	1.827	0.01705	Gm41361
-1.461	3.582	0.01031	Socs3
-1.456	1.623	0.007428	Nbl1
-1.446	2.206	0.02109	Klf10
-1.444	0.6066	0.04813	Gm42917
-1.438	3.778	0.001079	Tmsb10
-1.437	1.873	0.04135	Gm30411
-1.434	3.241	0.01291	Id2
-1.431	1.237	0.03775	ENSMUSG00000120202
-1.424	0.9126	0.04547	Catsper3
-1.422	6.188	0.02074	Jun
-1.412	2.601	0.02272	Gm37876
-1.401	3.955	0.01877	Ppp1r15a
-1.395	2.946	0.01804	ENSMUSG00000120030
-1.392	3.276	0.01343	Tex14
-1.386	1.1	0.02507	Arf4os
-1.384	1.349	0.04947	ENSMUSG00000120435
-1.379	3.25	0.01774	Chic1
-1.377	1.151	0.03575	Ralyl
-1.364	2.637	0.02913	Fzd7
-1.361	2.818	0.005272	Hes1
-1.344	3.171	0.01402	2010013B24Rik
-1.34	3.897	0.002318	Tagln2
-1.337	1.591	0.01065	ENSMUSG00000121177
-1.322	1.372	0.02507	Gm50211
-1.315	2.811	0.01085	AI504432
-1.313	1.137	0.01196	Crip1
-1.31	1.471	0.03988	Gstp1
-1.303	1.66	0.02644	ENSMUSG00000120134
-1.302	1.796	0.03575	Lmna
-1.3	2.192	0.01301	Ube2s
-1.297	2.093	0.01673	Gla
-1.288	1.438	0.02516	Gm10762
-1.286	2.966	0.01106	Ildr1
-1.278	5.305	0.01705	Zfp729a
-1.277	1.394	0.02765	Kcna3
-1.273	3.702	0.001388	Zfyve21
-1.269	2.267	0.02601	Lipc
-1.267	5.846	0.005114	Gm49342
-1.262	1.49	0.0166	Tob1
-1.259	0.7288	0.03082	Gm11805
-1.251	7.831	0.0001026	Xpr1
-1.247	3.688	0.007573	Myc
-1.244	3.346	0.01177	Map3k19
-1.228	2.347	0.0313	Capn1
-1.225	1.011	0.0215	Gm43909
-1.218	2.376	0.02599	Gm30198
-1.211	1.901	0.01177	Gm36445
-1.203	1.526	0.04547	Dusp18
-1.201	3.083	0.01035	Tlcd2
-1.191	2.383	0.02328	Nhp2
-1.167	1.915	0.03338	Gm37305
-1.163	3.413	0.0131	Gm44710
-1.16	2.242	0.02039	Plekha4
-1.153	3.209	0.03292	H1f4
-1.145	4.032	0.009605	Slamf8
-1.143	2.873	0.01161	Cnn2
-1.132	12.88	0.01174	Lars2
-1.13	5.783	0.0006138	Cmtm8
-1.121	1.739	0.02604	Tmem223
-1.12	6.879	0.006736	Il1a
-1.117	6.612	0.01004	Dusp6
-1.104	5.369	0.0001031	Gpx1
-1.103	4.129	0.002987	Rasgrp4
-1.093	3.16	0.02768	Spock1
-1.088	2.617	0.0302	Gm28981
-1.085	4.302	0.01673	Epha2
-1.08	6.883	0.001167	Gpr183
-1.068	5.926	0.02507	Arhgap15
-1.067	4.482	0.002025	Hmga2-ps1
-1.062	1.114	0.04135	Acot2
-1.058	2.179	0.01312	Mrpl36
-1.052	5.339	0.01654	Ppia
-1.049	4.843	0.002029	Pnp
-1.044	4.88	0.01186	Junb
-1.041	3.839	0.003264	Selenon
-1.035	4.206	0.002064	Ets2
-1.035	3.678	0.01556	Gm31243
-1.033	3.9	0.02383	H2az1
-1.033	3.257	0.02543	Csrnp1
-1.027	1.645	0.02039	Ubxn11
-1.026	3.618	0.006833	B4galnt1
-1.02	9.191	0.04058	Gm15564
-1.018	5.083	0.0005105	Bzw2
-1.014	3.239	0.01612	Fam167b
-1.012	3.521	0.03137	Trib1
-0.9952	3.439	0.03372	Nr4a1
-0.9923	4.489	0.002794	Fhad1
-0.9898	1.782	0.03206	Tubb6
-0.986	5.145	0.002527	Nod1
-0.9837	3.134	0.03372	Osm
-0.978	3.004	0.04946	Gm55604
-0.9726	4.637	0.0131	A630089N07Rik
-0.9701	2.9	0.04519	Gm37229
-0.9672	3.154	0.01409	Tomm22
-0.9653	2.728	0.02507	Cnpy4
-0.9571	3.121	0.04295	Ccr2
-0.9553	5.688	0.004735	Ppp1r10
-0.9528	11.75	0.002987	Cst3
-0.9524	5.631	0.00976	Igsf8
-0.9512	3.122	0.02927	Pdzrn4
-0.9497	3.534	0.01188	2810013P06Rik
-0.9478	1.963	0.01634	Naa38
-0.9457	6.186	0.02214	ENSMUSG00000120580
-0.9455	4.186	0.005304	Jam3
-0.94	3.367	0.02129	Tceal9
-0.9356	5.395	0.009157	Sox4
-0.9343	5.488	0.01421	Btg2
-0.9325	4.452	0.01966	Nectin2
-0.931	2.483	0.02469	Tmem160
-0.9265	2.635	0.03335	Nop10
-0.9178	3.293	0.04578	Cstb
-0.9165	6.374	0.01774	Bcl2
-0.9138	3.869	0.01723	Notch4
-0.9108	4.042	0.04826	Marcksl1
-0.9077	6.493	0.01253	Tom1l1
-0.9073	2.508	0.02507	Tor2a
-0.9051	3.623	0.009399	Gm15441
-0.9048	4.51	0.005921	Bcl6
-0.9009	3.134	0.04021	Gm54867
-0.8999	2.846	0.02588	Gm7964
-0.898	4.322	0.03586	Masp1
-0.897	2.241	0.0246	Dph3
-0.8964	2.805	0.01669	Cycs
-0.896	4.752	0.01837	Pcna
-0.8945	6.514	0.002443	Naalad2
-0.8934	4.638	0.001525	Errfi1
-0.8889	2.179	0.02921	H2-Oa
-0.8795	5.262	0.007918	Ier5
-0.8793	4.887	0.002786	Lfng
-0.8772	6.285	0.001008	Hsp90aa1
-0.8772	2.602	0.0295	Per2
-0.8761	5.749	0.0002021	Tgm2
-0.8715	8.406	0.002364	Ssbp2
-0.8704	6.356	0.01646	Mir142hg
-0.8696	5.444	0.02898	Dnajb4
-0.8668	5.708	0.02472	Ubb
-0.8621	3.892	0.03895	Gm47469
-0.853	6.365	0.002389	Actg1
-0.8479	6.13	0.002346	Btg1
-0.8396	5.249	0.002688	Nudc
-0.8387	2.446	0.04547	Egr2
-0.8368	8.4	0.0001026	Ccr5
-0.8366	4.357	0.008156	Slc66a1
-0.8358	1.823	0.04402	Pex12
-0.8331	2.596	0.04272	Uqcr10
-0.8276	5.481	0.007028	Tnfsf13b
-0.8271	3.779	0.04355	Chchd2
-0.826	2.703	0.04005	4933433G15Rik
-0.8246	4.218	0.03703	Atp6v1f
-0.8187	5.396	0.01052	Zfp36
-0.8177	3.426	0.01607	2310022B05Rik
-0.8152	4.657	0.007321	Gm21988
-0.8149	3.345	0.04333	Pvr
-0.8121	4.754	0.006688	Sptssa
-0.8115	3.341	0.01083	Glrx
-0.811	2.31	0.0466	4933423P22Rik
-0.8103	3.318	0.03137	Txnl4a
-0.8095	4.859	0.04402	Tuba1b
-0.8072	3.819	0.04741	Ndufa4
-0.8056	5.55	0.0293	Map3k20
-0.8032	4.973	0.01544	Irf2bpl
-0.8008	4.751	0.005942	Cdk5r1
-0.8	7.519	0.01983	Slc2a5
-0.7979	4.844	0.003292	Gm49368
-0.7926	2.866	0.04411	Plppr4
-0.7909	4.837	0.01188	Myl12a
-0.7896	2.178	0.04817	Btbd6
-0.7892	4.878	0.002	Plau
-0.7871	2.978	0.04899	Gramd3
-0.7861	2.699	0.02077	Smpdl3b
-0.782	4.829	0.0188	Hmgn1
-0.7815	9.874	0.003621	Tmsb4x
-0.7797	3.111	0.04342	Atp5e
-0.7788	7.962	0.01209	Rin2
-0.778	2.94	0.03743	Jagn1
-0.7775	2.98	0.03279	Uqcr11
-0.7739	6.98	0.0313	Ipcef1
-0.7721	7.663	0.02073	Hspa8
-0.772	2.797	0.03293	Odc1
-0.7713	3.876	0.01464	Acvrl1
-0.7514	3.589	0.02604	Hmgb2
-0.7485	6.273	0.04034	Fads1
-0.7483	2.64	0.02351	Pdlim2
-0.7483	3.578	0.0281	Psmb6
-0.7475	6.892	0.01343	Pea15a
-0.745	4.016	0.04572	Ssr2
-0.7449	3.394	0.03893	Peg10
-0.7438	6.776	0.001706	Tspan13
-0.7419	6.495	0.0007508	Evi2
-0.7416	6.294	0.01031	Cd34
-0.7407	5.648	0.02171	Rpl11
-0.7387	6.461	0.04156	Rpl21
-0.7383	2.532	0.04402	Zfp41
-0.7363	3.539	0.04964	D8Ertd738e
-0.7356	6.074	0.001901	Ccnd1
-0.7345	3.926	0.01556	BC031181
-0.7327	4.089	0.008078	Pqbp1
-0.7308	3.793	0.01209	Grcc10
-0.7294	3.062	0.0261	Ptp4a1 - ENSMUSG00000026064
-0.728	2.954	0.03985	Bend3
-0.7269	5.484	0.02913	1700025G04Rik
-0.7268	4.448	0.006736	Tuba1a
-0.7251	5.625	0.04457	Ccl6
-0.725	4.952	0.02507	Hrh2
-0.7227	16.83	0.01177	Rn18s-rs5
-0.7223	2.931	0.03438	Tmem60
-0.7215	3.453	0.02599	Gm20721
-0.721	9.024	0.003044	Rnase4
-0.7201	4.171	0.0446	Mcc
-0.7185	4.459	0.002615	Tmem100
-0.715	4.107	0.03988	Cox6a1
-0.7137	3.506	0.01556	Phospho1
-0.713	8.027	0.004185	Tnfrsf21
-0.7105	4.213	0.04712	Pilra
-0.7099	3.81	0.03161	Isyna1
-0.7066	3.144	0.04025	Txndc17
-0.7047	5.296	0.02507	Manf
-0.7042	7.471	0.01689	Tyrobp
-0.7033	6.711	0.0003078	Commd8
-0.702	7.579	0.003905	Fcgr2b
-0.6992	3.926	0.01409	Tmx2
-0.6988	4.623	0.02507	Rpl18
-0.6979	8.015	0.002622	Atg10
-0.6953	6.678	0.01118	Alox5ap
-0.6929	3.154	0.03973	Gm33370
-0.6923	5.12	0.04614	Arrdc3
-0.6922	2.951	0.0413	Nenf
-0.6896	5.241	0.006965	Mid1ip1
-0.6886	4.685	0.01654	Ppp1r3b
-0.6883	4.571	0.04651	Rpl35
-0.6861	6.058	0.0448	Gcnt2
-0.6824	6.956	0.004735	Tlr13
-0.6817	7.059	0.01865	Pfn1
-0.6811	5.107	0.02954	Mdh1
-0.6792	6.508	0.00234	Bhlhe41
-0.6786	4.367	0.01031	Cited2
-0.6778	4.624	0.00869	Ostc
-0.6777	6.472	0.02039	Zfand5
-0.6774	4.172	0.01559	Tor4a
-0.6773	6.255	0.002393	Evi2a
-0.6768	6.928	0.004268	Ogfrl1
-0.6765	6.652	0.02083	Coro1a
-0.6757	3.194	0.04156	Krtcap2
-0.6714	7.215	0.004575	Tspan18
-0.6711	5.37	0.02415	Adrb2
-0.6695	8.973	0.0007733	P2ry13
-0.6692	5.639	0.002527	Hhex
-0.6652	5.536	0.005685	Dstn
-0.6641	4.999	0.01177	Jund
-0.6618	3.528	0.01556	Ciapin1
-0.6615	5.041	0.01343	Tpbgl
-0.6602	3.596	0.04866	Eif3i
-0.6593	6.059	0.01007	Klf6
-0.6593	3.756	0.01705	Zfp386
-0.6586	4.762	0.005685	Rab32
-0.6522	4.126	0.03594	Nfkbib
-0.6503	9.297	0.01291	Plek
-0.6493	4.251	0.02073	P2ry10b
-0.6478	4.644	0.007321	Atf4
-0.6478	6.171	0.007428	Tubb5
-0.6478	3.211	0.02586	Slc10a3
-0.6466	9.599	0.004735	Tmem119
-0.6456	6.178	0.03172	Gas6
-0.6455	5.553	0.007967	Adora3
-0.6452	3.153	0.03954	Smim30
-0.6444	3.508	0.01556	Ubl4a
-0.6424	3.586	0.04116	Fam89b
-0.6416	3.133	0.03825	Ebpl
-0.6412	2.635	0.04952	Toe1
-0.6409	11.21	0.006607	Actb
-0.6403	4.825	0.01035	Nxt2
-0.638	5.538	0.01302	Stk17b
-0.6375	5.041	0.01035	Hnrnph2
-0.6356	7.79	0.01192	Med12l
-0.6338	3.888	0.0375	Hmgn2
-0.6331	6.278	0.01784	Sfi1
-0.6324	5.012	0.01065	Mlf2
-0.6285	5.677	0.0109	Gm21970
-0.6282	2.981	0.03032	Uqcc2
-0.6261	14.54	0.03987	Cmss1
-0.6234	4.659	0.02218	Cdk5rap1
-0.6231	5.129	0.02272	Cd302
-0.623	7.52	0.008391	Slc15a3
-0.6228	4.066	0.02932	Lrrc25
-0.6228	2.684	0.04943	Dnpep
-0.6224	3.548	0.02086	Otud1
-0.622	4.421	0.02546	Ceacam1
-0.6193	10.6	0.01188	P2ry12
-0.6184	5.593	0.002	Cln8
-0.6168	6.532	0.01081	Gng10
-0.6158	5.351	0.03642	Ppib
-0.6156	4.401	0.01616	Paqr3
-0.6151	3.862	0.03219	Get3
-0.613	3.79	0.04135	Sod1
-0.6126	7.777	0.003227	Rhoa
-0.6119	5.044	0.02396	Prkcsh
-0.6113	3.234	0.04728	Mrpl18
-0.6108	4.265	0.04402	Prdx5
-0.6108	3.641	0.04581	Rraga
-0.6083	3.064	0.04868	Camkk1
-0.607	4.097	0.04778	Coq10b
-0.6067	3.626	0.04005	Bmyc
-0.6066	3.848	0.04754	Tm2d2
-0.6065	3.814	0.03061	Irf2bp1
-0.6061	5.862	0.04868	Hspa12a
-0.6054	6.613	0.02051	Soat1
-0.6048	3.812	0.02396	2410002F23Rik
-0.6044	5.028	0.01804	Kdm6b
-0.6042	7.25	0.01657	Calm1
-0.6032	5.939	0.004702	Gngt2
-0.6016	3.395	0.04868	Hmga1
-0.5996	6.754	0.02214	Sgk1
-0.5988	7.994	0.004516	App
-0.5978	7.443	0.04116	Cfl1
-0.5948	5.325	0.04079	Prkab1
-0.5939	3.628	0.02828	Gpr35
-0.5921	6.519	0.00409	Plod1
-0.5917	5.979	0.04534	Serp1
-0.5915	4.867	0.0313	Arf6
-0.591	3.609	0.02611	Rinl
-0.5891	3.178	0.04826	Cand2
-0.5883	4.518	0.04457	Psmb8
-0.5845	4.111	0.02472	Med7
-0.5843	3.225	0.04156	Atp5g3
-0.5837	4.387	0.01065	Galnt4
-0.5835	4.723	0.03954	Ddit3 - ENSMUSG00000025408
-0.5788	5.145	0.01177	Leprotl1
-0.5785	5.218	0.03826	Tspan31
-0.5783	5.086	0.01468	Mmp2
-0.5776	5.332	0.03372	Mrfap1
-0.5766	3.932	0.0188	Tlr12
-0.5732	3.487	0.04534	Ech1
-0.5731	5.797	0.0446	Eif5a
-0.5707	5.173	0.02027	Snap29
-0.5696	6.659	0.002389	Wdr1
-0.5691	3.93	0.01733	Hexim1
-0.566	5.148	0.01211	Cldnd1
-0.5654	5.612	0.02576	Dennd2c
-0.5638	5.961	0.01489	Flna
-0.5625	10.34	0.003701	Selenop
-0.5618	5.082	0.008582	Denr
-0.5615	6.311	0.04721	Hnrnpab
-0.5605	4.835	0.02507	Naa20
-0.5602	4.261	0.01556	Cnp
-0.5601	4.378	0.03372	Rnf24
-0.558	4.679	0.04817	Oaz1
-0.5576	7.451	0.0188	Itm2c
-0.5556	8.186	0.02472	Gnas
-0.5537	3.733	0.04868	2210016F16Rik
-0.5525	5.066	0.03851	Kcnj2
-0.5512	5.343	0.0113	Tob2
-0.5505	4.468	0.02545	Tmem9b
-0.5504	5.342	0.01544	Tspan3
-0.549	7.979	0.007428	Ctsc
-0.5489	5.529	0.0253	Tmed9
-0.5485	7.091	0.002615	Ndfip1
-0.5473	6.02	0.01301	Fam111a
-0.5472	4.13	0.03525	Arpc5l
-0.5455	3.566	0.04172	Akr1b3
-0.5454	5.513	0.01108	Drg1
-0.5434	4.058	0.02765	Atxn7l3
-0.5429	4.009	0.03335	Eif1b
-0.5417	4.46	0.0414	Cetn3
-0.5414	4.6	0.02097	Lbh
-0.5408	4.075	0.04563	Cox6c
-0.5403	7.178	0.01209	Myo1b
-0.5386	6.021	0.02615	Pcbp1
-0.538	5.832	0.01922	Hsd17b12
-0.5357	4.891	0.02823	Rcn2
-0.5351	4.402	0.02507	Ndufc2
-0.5347	3.143	0.04868	Map1lc3a
-0.5346	2.947	0.04398	Med21
-0.5344	4.601	0.01719	Smim15
-0.5343	8.415	0.003291	Bin2
-0.5341	6.191	0.04941	Etv1
-0.532	7.159	0.03032	Arhgdia
-0.5319	6.021	0.01877	Naca
-0.5313	5.144	0.01705	Pdia5
-0.5313	4.682	0.03701	Dlg3
-0.5312	7.481	0.004185	Tspan7
-0.5306	6.509	0.03293	Spcs2
-0.5289	6.577	0.01612	Sting1
-0.5284	4.434	0.01666	Smim10l1
-0.5272	3.959	0.04868	Saysd1
-0.5265	7.056	0.03147	Aif1
-0.5264	5.827	0.02083	Limd2
-0.5254	5.281	0.01057	Txnrd1
-0.5251	6.076	0.01402	Eloa
-0.5239	7.238	0.01065	Ptms
-0.5239	9.049	0.03998	Hsp90b1
-0.5221	6.066	0.01616	Lman1
-0.5218	3.548	0.04409	Fkrp
-0.521	10.45	0.006642	Sparc
-0.521	5.678	0.0313	Arpc3
-0.52	6.659	0.01065	Sowahc
-0.5183	6.036	0.01097	Tmem86a
-0.518	5.903	0.04702	Slc25a5
-0.5179	6.625	0.00605	M6pr
-0.5175	3.846	0.04457	Rps6ka4
-0.5157	3.578	0.04124	Taf7
-0.5152	5.929	0.02073	Syngr2
-0.5136	5.044	0.01106	Jup
-0.5129	4.815	0.01646	Kdelr1
-0.5125	4.124	0.02914	Tvp23b
-0.5115	8.889	0.02823	Cables1
-0.5109	4.683	0.02601	Slc25a11
-0.5108	8.269	0.00754	Cap1
-0.5106	4.25	0.01657	Zfp513
-0.5087	4.903	0.04868	Psma7
-0.508	5.523	0.04711	Cct6a
-0.508	4.879	0.04826	Syf2
-0.5079	6.433	0.03147	H3f3b
-0.5063	5.367	0.03372	Stxbp4
-0.5061	8.293	0.0109	Cd53
-0.5055	5.903	0.02823	Ptbp1
-0.5043	8.254	0.00617	Efhd2
-0.5028	4.884	0.02109	Jpt1
-0.5021	3.463	0.04547	Flt1
-0.5016	7.161	0.01327	Arl6ip1
-0.5011	5.514	0.01343	Ctbp1
-0.5009	6.392	0.00699	Ywhag
-0.4995	4.43	0.02847	Map7
-0.4984	4.887	0.01666	Adprh
-0.4977	5.705	0.01983	9130015G15Rik
-0.4976	10.71	0.005587	Lgmn
-0.4973	4.164	0.02507	Ramp2
-0.4966	4.4	0.02472	Emc10
-0.4965	6.068	0.003227	Usp22
-0.4942	4.58	0.04005	Slbp
-0.4938	3.628	0.04751	Tapbpl
-0.4935	7.26	0.003044	Samsn1
-0.4928	7.083	0.0313	Cd68
-0.4925	6.237	0.01305	Vps37b
-0.4916	5.827	0.03263	Xbp1
-0.4907	7.368	0.02365	Txnip
-0.4906	4.449	0.02507	Nrep
-0.4894	4.63	0.03826	Eps8
-0.4891	6.381	0.01365	Mapre1
-0.4888	3.759	0.02823	Ints12
-0.4883	4.153	0.04457	Sde2
-0.4882	5.705	0.01694	Skp1
-0.4882	5.512	0.0275	Fuca1
-0.4872	5.856	0.03727	Gnb2
-0.4861	8.369	0.004976	Gnai2
-0.4854	7.38	0.01607	Spred1
-0.4852	10.03	0.01307	Marcks
-0.4852	8.931	0.0234	Canx
-0.4847	5.025	0.03572	Myadm
-0.4823	6.737	0.01188	Arl4c
-0.4812	5.501	0.03111	Nras
-0.4799	4.462	0.04702	Cd276
-0.4796	5.54	0.02604	Sub1
-0.4756	6.179	0.04272	Set
-0.4747	6.502	0.03766	Mapkapk2
-0.4719	5.299	0.03575	Spns2
-0.4715	6.351	0.009608	Reep5
-0.4706	6.2	0.02507	Saraf
-0.4675	5.232	0.04887	Morrbid
-0.4651	4.562	0.02834	Pgrmc1
-0.4641	6.079	0.01631	Zfp706
-0.4631	4.92	0.04457	Mgat2
-0.4628	5.561	0.04057	Prps2
-0.4626	3.648	0.04946	Rbm43
-0.4596	6.188	0.008165	Arpc4
-0.459	7.082	0.01243	Laptm4a
-0.4585	5.612	0.01688	Nudt4
-0.4564	5.059	0.01656	Zyx
-0.4535	5.738	0.03244	Sash3
-0.4531	9.644	0.01915	Klf12
-0.4524	4.395	0.04932	Ppp1r11
-0.4516	5.308	0.03586	Ppp1ca
-0.4512	8.155	0.004185	Adgre1
-0.4511	6.714	0.01383	Slc44a2
-0.4502	6.355	0.02105	Tmx4
-0.4498	4.222	0.0488	Ltbr
-0.4492	10.21	0.0277	Rapgef5
-0.4468	4.962	0.03594	Med22
-0.4465	6.672	0.01647	Ociad1
-0.4454	6.37	0.01106	Azin1
-0.4452	4.576	0.04946	Osgep
-0.4438	4.557	0.04868	Eaf1
-0.4434	5.472	0.03111	Tmco1
-0.4431	6.779	0.01067	Tifab
-0.4429	5.285	0.0188	Emc3
-0.4427	5.787	0.04868	Surf4
-0.4421	5.135	0.04946	Hsbp1
-0.4414	6.779	0.009608	Arf1
-0.4412	5.663	0.04914	Zeb2os
-0.4411	7.412	0.03893	Ppt1
-0.441	5.547	0.03461	Pnrc1
-0.4407	7.955	0.01648	Calm2
-0.4401	6.267	0.01559	Selenot
-0.4401	6.023	0.02913	Cops4
-0.4394	6.396	0.04826	Nova1
-0.4386	9.044	0.01669	Basp1
-0.4379	4.722	0.04172	Dld
-0.4373	9.002	0.01138	Rtn1
-0.4321	6.736	0.02493	Prpf8
-0.4319	5.704	0.04745	Lpar6
-0.4317	5.027	0.04868	Gm44250
-0.4292	7.967	0.0234	Tmbim6
-0.4267	7.359	0.01975	Sdcbp
-0.4263	7.369	0.01118	Ifnar2
-0.426	6.694	0.01314	Ldhb
-0.4247	4.808	0.03279	Slc25a4
-0.4232	6.24	0.04952	Sqstm1
-0.4219	8.839	0.04868	Glul
-0.4198	6.829	0.01654	Fcgr1
-0.4167	5.905	0.0313	Ganab
-0.4146	6.634	0.02515	Il17ra
-0.4137	6.726	0.0188	Litaf
-0.4109	8.652	0.01065	Lcp1
-0.4097	5.147	0.02396	Tm7sf3
-0.4089	7.841	0.01478	Adgrg1
-0.4084	8.667	0.01705	Tln1
-0.407	8.41	0.02507	Eif4g2
-0.4053	4.935	0.04995	Grsf1
-0.4028	7.683	0.01301	Atf6
-0.4027	5.469	0.0313	Cnot8
-0.4023	4.285	0.04135	Tomm20
-0.4018	5.082	0.03405	Arl1
-0.4012	6.249	0.02304	Arf4
-0.4002	7.297	0.01303	Hmgb1
-0.3993	9.943	0.03893	Selplg
-0.3991	7.443	0.04135	Npc1
-0.3989	6.351	0.03009	Sall3
-0.3988	7.811	0.03524	Ddx3x
-0.3982	6.377	0.03159	Ghitm
-0.3973	6.782	0.01442	Morf4l1
-0.3971	5.628	0.01648	Micos10
-0.3951	6.362	0.04402	Selenof
-0.3936	8.817	0.03891	Lims1
-0.3932	8.06	0.0131	Arpc2
-0.393	6.937	0.02472	Prkar1a
-0.3907	6.391	0.01673	Ipo9
-0.3904	6.871	0.04513	Tram1
-0.3903	6.243	0.04457	Csnk1g3
-0.3895	7.004	0.01556	Hcls1
-0.3866	9.34	0.0109	Ddx5
-0.3808	6.616	0.0246	Arhgdib
-0.3777	5.602	0.02002	Rab35
-0.377	7.355	0.02109	Serinc1
-0.3758	7.013	0.03489	Arpc1b
-0.375	5.428	0.02481	Endod1
-0.3724	7.596	0.01701	Pla2g15
-0.3711	6.52	0.01949	Cpne3
-0.3695	6.501	0.02426	Smad7
-0.3685	6.988	0.04139	Tmed10
-0.368	4.787	0.04695	Dnttip2
-0.3657	5.748	0.02947	Trp53bp2
-0.3654	8.111	0.04766	Fcgr3
-0.3644	7.19	0.02084	Ywhaz
-0.364	4.791	0.04868	Mmd
-0.3624	7.828	0.0151	Rac1
-0.36	7.993	0.04059	Ubl3
-0.3541	5.231	0.03876	Adss
-0.3534	5.72	0.04457	Tlr3
-0.3517	6.501	0.03169	Sf3b2
-0.3494	8.513	0.01925	Ifngr1
-0.348	6.237	0.03743	Ppp1r18
-0.3476	6.928	0.04272	Arhgap4
-0.3473	7.027	0.04519	Ywhab
-0.347	6.679	0.02187	Tmem30a
-0.3454	9.009	0.03893	Fam102b
-0.3451	7.808	0.02604	Ywhae
-0.3402	11.32	0.02927	Cx3cr1
-0.3399	7.626	0.01574	Snx18
-0.336	11.25	0.0188	Csf1r
-0.3356	7.429	0.02921	Mlec
-0.3352	6.785	0.03944	Polr2a
-0.3351	4.823	0.04731	Hk1
-0.3338	5.644	0.03293	Spg20
-0.333	7.357	0.02109	Reep3
-0.3308	9.405	0.02472	Cyfip1
-0.3287	7.018	0.03126	Mapre2
-0.3267	6.377	0.02604	Vasp
-0.3262	8.494	0.01877	Actr2
-0.3244	6.046	0.02472	Srsf3
-0.3217	6.278	0.02567	Nfic
-0.3214	6.191	0.04253	Akt1
-0.3213	9.71	0.04034	Itgam
-0.3209	6.856	0.03825	Pmp22
-0.3195	10.18	0.04883	Laptm5
-0.3189	6.284	0.03844	Map7d1
-0.3158	7.891	0.02729	Edem1
-0.313	6.079	0.04402	Etf1
-0.3086	8.756	0.04001	Capza2
-0.3077	6.33	0.03572	Adam15
-0.3075	5.756	0.04034	Flii
-0.3067	8.366	0.02765	Tpm3
-0.2988	7.081	0.04777	Tmed7
-0.2987	7.959	0.02648	Tm9sf3
-0.2987	7.742	0.03051	Rab3il1
-0.2984	7.898	0.02543	Dtx4
-0.2925	8.214	0.04111	Rap1b
-0.2923	6.662	0.04505	Mcl1
-0.2916	8.563	0.03159	Pros1
-0.2876	7.171	0.03489	Hnrnpc
-0.2865	5.852	0.04197	Bnip3l
-0.2635	9.314	0.04766	Kctd12
-0.2565	7.544	0.04505	Gnb1
-0.2517	8.656	0.03506	Ptgs1
-0.2425	7.37	0.04754	Actr3
0.2454	7.529	0.04754	Rsrp1
0.2498	8.46	0.04738	Slc7a8
0.2539	7.305	0.03572	Arfgef1
0.2551	6.706	0.04034	Ube4b
0.2554	7.597	0.03893	Spag9
0.2575	8.487	0.04402	Cd33
0.2636	7.344	0.04416	Insr
0.2639	6.894	0.04751	Akap8l
0.2667	7.137	0.04741	Gigyf2
0.2717	7.719	0.04534	Galnt10
0.2754	6.562	0.04727	Scfd2
0.2765	7.432	0.03851	Pcm1
0.2765	8.352	0.03977	Zfp652
0.2767	7.529	0.04578	Crlf3
0.28	6.611	0.04402	Fnbp4
0.2821	6.935	0.03353	Srek1
0.2838	7.067	0.04561	Xrn1
0.2844	7.569	0.0359	Mdm4
0.2881	5.77	0.04778	Fig4
0.2885	6.437	0.04868	Depdc5
0.2894	5.95	0.04868	Slc25a36
0.2902	7.315	0.04387	Ogt
0.2907	6.823	0.0455	Arglu1
0.2954	7.336	0.04156	Dis3l2
0.2961	5.972	0.04956	Cep120
0.2972	7.21	0.04435	Fgd4
0.2975	7.509	0.02138	Aak1
0.2981	10.38	0.04402	Runx1
0.299	6.592	0.04651	Kdm5a
0.3013	6.037	0.04711	Dhx57
0.302	6.472	0.02927	Npepps
0.3039	7.149	0.04741	Tbck
0.304	7.562	0.02821	Usp15
0.3041	7.375	0.02417	Kdm2a
0.3044	6.462	0.04868	Manba
0.3049	6.955	0.03731	Rb1cc1
0.3059	7.22	0.02254	Ecpas
0.306	6.26	0.03263	Med27
0.3072	5.962	0.0497	Itgb3
0.3081	5.933	0.04547	Hira
0.3087	6.277	0.03572	Tom1l2
0.3087	5.768	0.04711	Khdc4
0.3098	8.169	0.01798	Ddx17
0.3098	7.643	0.02383	Senp2
0.3112	8.311	0.04519	Fcho2
0.3133	6.653	0.04754	Prpf39
0.3138	6.074	0.03701	Dop1b
0.3168	8.53	0.02604	Tbc1d16
0.3184	6.542	0.02218	Bckdhb
0.3185	7.32	0.01786	Fbrsl1
0.3199	5.613	0.04402	Gigyf1
0.3204	6.016	0.02921	Lats1
0.3213	6.973	0.04153	Pcdhgb2
0.3225	7.103	0.02507	Phf20l1
0.3227	6.528	0.0253	Slc30a7
0.3227	6.345	0.03586	Pkd2
0.3235	5.893	0.0317	Dennd4c
0.3243	6.299	0.03876	Pank2
0.3244	5.996	0.04651	Odf2
0.3257	7.436	0.03988	Aff1
0.3258	5.837	0.04985	Cdan1
0.3263	5.815	0.04525	Exoc3
0.3272	6.163	0.03461	Tdrd7
0.328	6.99	0.02005	Kidins220
0.3307	6.638	0.04754	Slc30a9
0.3319	6.529	0.02406	Hectd4
0.3333	8.453	0.03528	Rcsd1
0.3337	6.276	0.04316	Fam193b
0.3392	6.292	0.04618	Cspp1
0.3407	6.285	0.02583	Brd7
0.3407	6.045	0.03169	Sap130
0.3413	6.421	0.03295	Ccnt2
0.3437	6.645	0.04868	Il15
0.3441	6.476	0.02396	Pdpk1
0.3448	6.316	0.01654	Vac14
0.3452	5.654	0.03585	Rev3l
0.3475	7.398	0.03684	Herc4
0.3476	5.349	0.04172	Taf2
0.3482	6.282	0.04148	Ccdc88a
0.3487	6.903	0.01758	Nfix
0.3492	7.056	0.01129	Gm21992
0.3505	6.764	0.04198	Zfc3h1
0.3507	6.127	0.01631	Desi2
0.353	7.096	0.02472	Abl2
0.3545	7.225	0.04402	Arhgef11
0.3547	6.364	0.04859	Tardbp
0.3554	6.576	0.02272	Hsd17b4
0.3562	7.003	0.01913	Wdr7
0.3571	5.686	0.03436	Ric1
0.3574	5.208	0.0313	Cep135
0.3581	7.961	0.01705	Ubn2
0.3585	5.438	0.04019	Tbc1d12
0.3592	5.321	0.04241	Mrps6
0.3596	7.199	0.04572	Cop1
0.36	5.249	0.03825	Gkap1
0.3624	7.828	0.01557	Pnisr
0.3624	7.984	0.03479	Pwwp2a
0.3625	5.987	0.02135	Gm29609
0.3663	5.466	0.03186	Terf1
0.3667	6.006	0.03586	Snapc3
0.3678	5.506	0.02547	Zfyve16
0.3679	6.325	0.01544	Cdc37l1
0.3683	5.547	0.04547	Pik3c3
0.369	7.205	0.01552	Bltp1
0.3701	5.818	0.02582	Zfp182
0.3703	9.354	0.02532	Ivns1abp
0.3704	6.753	0.03506	Dtnbp1
0.3713	5.514	0.04578	Txlng
0.3728	5.445	0.02729	Luc7l
0.3733	7.187	0.04005	Kif13b
0.3734	6.155	0.01705	Oip5os1
0.3762	5.453	0.0331	Cnot10
0.3772	5.856	0.03586	Firre
0.3777	5.32	0.03876	Ap3s1
0.3786	5.583	0.02577	Apaf1
0.3803	7.74	0.03195	Arid4a
0.3813	5.6	0.02005	Kif2a
0.3813	5.202	0.02472	Ncapd3
0.3813	5.031	0.04197	Gmcl1
0.3821	5.727	0.02057	Usp45
0.3825	6.054	0.03678	Pcnx
0.3845	5.982	0.01347	Agap3
0.3848	5.763	0.04356	Tyk2
0.3866	6.748	0.03129	Camkmt
0.387	6.531	0.023	Spopl
0.3884	5.766	0.03161	Cdin1
0.3888	5.184	0.04754	Tbc1d19
0.389	5.024	0.0313	Herc3
0.3894	6.69	0.0246	Ubn1
0.3916	7.678	0.01128	Ccdc93
0.392	5.176	0.03948	Rbm4
0.3921	7.755	0.04005	Dpy19l4
0.3926	5.524	0.01874	Slc20a2
0.3928	6.458	0.01925	Plekha1
0.3931	5.259	0.03338	Miga1
0.3934	6.184	0.02086	Chic2
0.3937	7.96	0.01648	A630001G21Rik
0.394	6.564	0.02505	Tango2
0.397	5.322	0.02266	Ttc37
0.3977	6.04	0.02516	Slc38a6
0.3984	6.921	0.01031	Ncoa1
0.4	6.66	0.0188	Klhl24
0.4012	5.89	0.01792	Mob2
0.4036	4.871	0.04745	Mre11a
0.404	5.088	0.04578	Gdap2
0.4086	7.938	0.0313	Rnf169
0.4087	4.383	0.04996	Tcp11l2
0.4102	4.364	0.04932	Rnf31
0.4103	7.263	0.02057	Dhx9
0.411	4.44	0.03826	4933427D14Rik - ENSMUSG00000020807
0.4121	6.397	0.01464	Tent4b
0.4123	4.868	0.03731	Ankrd26
0.4125	5.334	0.03279	Slf1
0.4127	4.983	0.04135	Elmod2
0.4136	6.747	0.01409	Fubp1
0.4173	4.896	0.04778	Tyw1
0.4175	5.656	0.03195	Pde4b
0.4184	5.479	0.0415	Zfp160
0.4213	7.183	0.01508	Pbx3
0.4219	7.29	0.01975	Tmem104
0.4238	6.327	0.01211	Cr1l
0.4248	5.177	0.01504	C2cd5
0.4251	5.702	0.02485	Gtpbp2
0.4255	8.117	0.003701	Phyhd1
0.4266	3.877	0.04519	Pde8a
0.4268	5.977	0.01085	Ubp1
0.4274	4.971	0.03731	Tfdp2
0.4279	5.374	0.04711	Acaca
0.4282	4.71	0.03575	Styx
0.4288	6.449	0.03586	Yes1
0.429	5.317	0.04983	Trappc12
0.4309	5.687	0.03727	Cplane1
0.4338	6.641	0.02654	Tmem87b
0.4366	6.107	0.0188	Ikzf2
0.4377	5.016	0.04711	Rab11fip3
0.4378	4.835	0.03111	Brd9
0.4398	4.998	0.02109	Zfp866
0.4413	6.032	0.02289	Esco1
0.4415	5.91	0.03061	Tspan5
0.4425	5.408	0.01694	Myo6
0.4429	4.478	0.04402	Lin9
0.4432	4.283	0.04868	Vps33b
0.4473	4.74	0.03537	Ankrd16
0.4473	5.685	0.03825	Zc3h12c
0.4478	4.435	0.04199	Shq1
0.4479	5.555	0.04572	Fam118b
0.4487	4.488	0.02601	Nt5m
0.4491	4.766	0.03295	Trim5
0.4493	4.61	0.01774	Rcor3
0.4493	5.727	0.04135	Parp9
0.4507	5.289	0.02472	Map3k9
0.451	5.707	0.04005	Mllt3
0.4519	7.603	0.03996	Sdk1
0.4552	5.773	0.04402	Rspry1
0.4566	5.272	0.0399	Ttll4
0.4566	4.058	0.04582	Pank4
0.4587	4.375	0.02818	Gm10033
0.4625	5.996	0.006326	Invs
0.4647	4.416	0.03522	Atg13
0.4649	5.88	0.0246	Emsy
0.465	5.712	0.01276	Agtpbp1
0.4652	8.38	0.0253	Pnpla7
0.4652	4.014	0.03116	Zfp626
0.4657	6.748	0.01177	Sipa1l3
0.4669	5.523	0.03779	Ddhd1
0.4671	6.848	0.004185	Rc3h1
0.4676	6.102	0.01764	Trim14
0.4692	5.392	0.01556	Nek1
0.4701	5.984	0.02214	Swt1
0.4703	7.093	0.006378	Cpsf6
0.4718	4.743	0.02109	Trim3
0.4744	4.833	0.01648	Ndor1 - ENSMUSG00000006471
0.4765	6.924	0.01764	Gm33989
0.4771	5.103	0.01552	Zfp280c
0.4772	5.007	0.01614	Trmt11
0.4786	5.373	0.01657	Mtmr14
0.4795	4.045	0.04778	Mettl4
0.4799	6.521	0.03948	Apobec3
0.4807	6.433	0.01657	Kdm3a
0.4813	4.85	0.01004	Rrnad1
0.4826	6.065	0.01925	Naip6
0.4837	5.34	0.01777	Jmy
0.4853	4.681	0.04224	Desi1
0.4855	4.496	0.02002	Utp25
0.486	5.289	0.02135	Gpr160
0.4898	7.041	0.005332	Ggta1
0.491	6.596	0.03731	Snta1
0.4915	4.083	0.03096	Agfg2
0.4915	5.407	0.04355	Cd200r1
0.4928	4.712	0.03586	AW146154
0.4939	6.716	0.009015	Appl2
0.4945	6.861	0.01409	Crebrf
0.4966	5.864	0.01451	Plekha5
0.4973	3.597	0.04711	Ift80
0.4986	4.919	0.04402	Tnip1
0.4991	4.101	0.03061	Caml
0.4996	7.301	0.003212	Kansl1l
0.5004	6.544	0.0253	Nav1
0.5026	3.319	0.04272	Stx1a
0.5051	5.339	0.01118	Gm20732
0.5071	4.516	0.03263	Brms1l
0.5071	3.442	0.04342	4930503L19Rik
0.5086	5.15	0.01613	Gpd1l
0.5102	8.01	0.0215	Cdk14
0.5109	5.664	0.01085	Auh
0.5133	4.833	0.01556	Cyp27a1
0.5146	4.829	0.01673	Tecpr2
0.5161	3.602	0.03486	Rpain
0.5176	4.897	0.03071	Gm7240
0.5181	5.906	0.03116	Vps37a
0.5195	4.603	0.01556	Msh3
0.5205	4.911	0.01798	Unkl
0.5245	3.316	0.0432	Dffa
0.5246	4.359	0.02821	Cnep1r1
0.5286	4.817	0.04457	Tmco4
0.529	5.974	0.005304	Madd
0.5295	6.88	0.002389	Luc7l3
0.5333	4.972	0.03851	Ocrl
0.5337	6.579	0.01118	Atg4a
0.5399	4.62	0.0188	Gm46515
0.5402	4.801	0.03432	Sanbr
0.5403	6.238	0.04193	Herc6
0.5412	3.861	0.0246	Cbx7
0.5424	6.503	0.0375	Banp
0.5434	3.913	0.03178	Vamp5
0.5461	4.738	0.04016	Zfp839
0.5483	3.75	0.0427	2900076A07Rik
0.5485	6.444	0.002029	Ttc14
0.5504	7.046	0.003619	Mbtd1
0.5515	5.757	0.01556	Pcmtd2
0.5519	3.959	0.0415	Traf3ip1
0.5528	4.493	0.04741	Zfp808
0.553	5.043	0.01218	Arsk
0.5536	5.61	0.01347	Stard8
0.554	7.022	0.04068	Frrs1
0.5549	5.494	0.01285	Stard3nl
0.555	5.804	0.01612	Lpin1
0.5553	4.805	0.03239	Il15ra
0.5556	3.364	0.0351	Gm26920
0.5592	8.197	0.00754	Atp2c1
0.5594	7.181	0.004671	Btaf1
0.5604	5.254	0.02383	Trim36
0.5638	4.766	0.008082	Coa8
0.5685	8.152	0.01085	Cd84
0.5696	4.659	0.01065	Kdm1b
0.5701	5.809	0.003468	St7l
0.5709	5.175	0.0313	Zcwpw2
0.5722	3.671	0.01915	Nbdy
0.5723	4.465	0.01177	Crebzf
0.5777	3.758	0.02507	Carnmt1
0.578	6.374	0.002389	Vwa8
0.5788	3.864	0.04651	Zfp760
0.5804	8.91	0.01209	Sipa1l2
0.5805	4.928	0.02472	Glrp1
0.5811	6.393	0.01031	Pxk
0.5855	3.992	0.02932	Gna11
0.5873	4.007	0.03404	Slc17a9
0.5892	7	0.04868	mt-Cytb
0.5896	5.082	0.01392	Gm1976
0.5896	4.558	0.03893	Ahsa2
0.5907	3.29	0.04841	Slc25a27
0.5915	3.106	0.03594	5430403G16Rik
0.5946	5.793	0.01312	Adarb1
0.5953	5.709	0.01209	Stx5a
0.5999	4.466	0.01657	Podn
0.6014	3.062	0.03484	Fcsk
0.6022	3.935	0.02921	Pink1
0.6029	4.377	0.01276	Armc7
0.6063	5.469	0.006409	Slc25a26
0.6124	6.437	0.002015	Kat2b
0.6164	3.431	0.02806	Otud3
0.6168	6.787	0.01085	Rassf4
0.6171	4.425	0.009399	Nedd1
0.6174	5.025	0.01666	Cpeb3
0.6174	4.233	0.01901	Srr
0.6207	7.994	0.00158	Spire1
0.6211	3.471	0.02109	Adat1
0.6216	5.073	0.01801	Agl
0.6239	7.33	0.04005	Prkg1
0.6266	3.707	0.02619	6820431F20Rik - ENSMUSG00000071796
0.6274	5.939	0.01128	Naa16
0.6281	3.592	0.0384	Nudt7
0.6282	3.786	0.02109	Taf8
0.6298	5.633	0.01614	1110019D14Rik
0.6365	4.306	0.04387	Pcgf5
0.64	4.622	0.03803	Sparcl1
0.6423	3.629	0.01349	Taf1a
0.6425	3.527	0.01925	Zmym1
0.6431	4.688	0.006353	Acp6
0.6438	4.405	0.04859	Uap1
0.6451	3.804	0.02601	Acaa1a
0.6485	4.272	0.03126	Atat1
0.651	6.127	0.007001	Pot1b
0.6538	3.531	0.03457	Cep89
0.6549	7.589	0.009157	Mlxip
0.6563	6.892	0.002029	Rilpl1
0.6612	4.835	0.008396	Purg
0.6633	4.95	0.01781	Cd80
0.6674	9.95	0.004735	Prkn
0.6687	4.375	0.04702	Taco1
0.67	4.715	0.01004	Sdhaf3
0.6702	3.217	0.04754	E230016M11Rik
0.6748	3.29	0.01975	Zfp971
0.6753	3.98	0.03615	E130102H24Rik
0.6758	3.856	0.02084	ENSMUSG00000121051
0.676	5.22	0.004185	Cep162
0.6822	3.534	0.02214	Serinc5
0.6849	3.824	0.0109	Helb
0.6857	6.599	0.002794	N4bp2l1
0.6889	3.906	0.01631	Ankzf1
0.6937	4.427	0.01004	Nudt5
0.702	4.442	0.0253	Fyn
0.7026	3.715	0.04457	Rbbp8
0.7097	3.803	0.0203	mt-Nd6
0.7153	3.662	0.01657	Mettl3
0.7224	3.358	0.01035	Tarbp1
0.7231	3.573	0.01556	Gm50048
0.7262	2.289	0.03506	2810405F17Rik
0.7293	3.366	0.02507	Zfp932
0.7295	3.953	0.01584	Zfp961
0.7386	3.014	0.03796	Mfap3l
0.7392	3.356	0.02611	Oscp1
0.7401	3.357	0.04355	BC065397
0.7426	3.451	0.01453	Xylb
0.7467	6.971	0.01002	Trak1
0.7474	2.65	0.04146	Zscan12
0.7553	6.046	0.001461	Ide
0.7579	5.618	0.002389	4833420G17Rik
0.7596	5.85	0.002987	Mras
0.7645	2.856	0.04817	Mdfic
0.7657	3.856	0.0131	Chek2
0.7676	2.776	0.03792	Rab23
0.7728	5.04	0.04702	Zfp933
0.7732	5.727	0.002088	Zfp951
0.7786	5.931	0.01559	Dapk1
0.7814	4.669	0.003026	B3galnt2
0.7817	5.529	0.03061	Marchf3
0.7823	4.501	0.01301	Ythdc2
0.7842	6.104	0.01128	Ppm1e
0.7845	6.978	0.002389	Plxdc1
0.7895	4.654	0.01118	2900089D17Rik
0.8009	2.688	0.03586	Satb2
0.8057	2.812	0.0188	Gemin8
0.8224	4.799	0.006736	Atp1a2
0.8255	8.437	0.02357	Rtn4rl1
0.826	3.515	0.01011	Cep97
0.8278	5.354	0.003326	Acvr2b
0.8381	6.25	0.01544	Slc1a2
0.843	2.368	0.03816	Catsperg1
0.8471	7.037	0.001123	Iqsec2
0.8531	7.043	0.008396	Rab6b
0.8537	2.959	0.04868	Zmat3
0.8553	3.966	0.02013	Gm47754
0.8575	2.136	0.04826	Zfp455
0.8594	4.256	0.007428	Krba1
0.8735	3.972	0.02084	Ell2
0.8746	2.856	0.04137	Fam78b
0.8778	2.53	0.03891	ENSMUSG00000121378
0.8869	7.207	0.002029	Kif13a
0.8972	2.377	0.02567	Gm20045
0.9021	2.316	0.03404	Bora
0.9032	3.531	0.04124	Olfml2b
0.9037	4.877	0.003292	Mapkapk3
0.9074	1.92	0.04272	Nr1d1
0.9078	4.482	0.002786	Dusp12
0.9097	3.417	0.02411	Gm38171
0.9229	3.866	0.002025	Mon1a
0.9243	3.455	0.01031	Gm40466
0.9296	3.998	0.023	Ccdc61
0.9387	1.797	0.04402	Ocln
0.9454	3.705	0.03461	D2hgdh
0.9501	2.037	0.04138	Slc36a2
0.9525	1.738	0.03572	Rnase6
0.9587	2.805	0.02177	St3gal1
0.9672	2.163	0.02604	Lrriq3
0.9692	4.727	0.01193	Gm37306
0.9703	3.827	0.002015	Tspan33
0.992	2.662	0.02712	Mrc1
1.002	1.719	0.0359	Zbtb46
1.003	2.941	0.04402	Atp1b2
1.006	7.237	0.001623	Slc12a2
1.016	2.127	0.04663	Cers4
1.018	5.092	0.01419	Smo
1.03	4.267	0.03851	Gadl1
1.036	9.397	0.0006047	Magi1
1.038	2.909	0.03458	Mri1
1.049	2.312	0.023	Zfp874a
1.049	2.545	0.03372	Trim30c
1.05	4.837	0.008835	Cast
1.058	2.859	0.01343	Hectd2
1.06	7.456	0.01031	F11r
1.061	4.313	0.0006047	Clcf1
1.062	3.522	0.01287	Lrig3
1.063	3.41	0.0166	Hpn
1.067	5.547	0.02472	Cep112
1.075	4.992	0.02921	Zfp467
1.094	4.038	0.001023	Nipal3
1.1	2.327	0.04547	Tnfsf10
1.107	1.694	0.02507	ENSMUSG00000120205
1.11	3.47	0.0131	Efna5
1.116	3.483	0.02002	Nudt6
1.13	4.189	0.002389	Trps1
1.138	8.571	0.04241	Prkce
1.139	4.183	0.002318	Rcan3
1.146	1.311	0.03258	Zfp493
1.153	1.089	0.02601	Slc22a23
1.161	2.494	0.03575	Ptpn22
1.188	1.689	0.01656	6430590A07Rik
1.193	5.269	0.001015	Nln
1.201	3.237	0.002443	Ccdc28b
1.206	1.433	0.0313	Gm26621
1.23	3.617	0.005396	Elavl4
1.235	1.015	0.02106	Fap
1.237	4.698	0.0006138	Esrrg
1.237	1.427	0.02893	Stag3
1.319	0.6851	0.0478	Tmtc1
1.335	2.457	0.01673	Pstpip2
1.355	3.814	0.0129	Acsf2
1.358	3.673	0.002389	Tatdn3
1.374	0.736	0.02687	Mill2
1.415	1.288	0.03129	Ptpn14
1.418	3.363	0.003359	Gm26782
1.421	1.78	0.01559	Scg3
1.429	1.903	0.01473	Gm21781
1.478	1.704	0.01556	Fam241a
1.495	1.202	0.009594	Abhd14b
1.496	4.276	0.00234	Zfp862-ps
1.521	1.435	0.0104	Ica1
1.54	2.212	0.01078	Gm10874
1.557	1.491	0.01887	Ldlr
1.574	0.8815	0.01343	4930488L21Rik
1.584	6.065	0.0008779	Gm45837
1.604	3.034	0.006983	Rnf17
1.635	0.07502	0.04868	Gm35572
1.664	3.149	0.009512	Gm10125
1.675	0.7886	0.01925	Steap3
1.692	1.393	0.03332	Foxp4
1.693	2.422	0.01925	Pde10a
1.737	4.073	2.836e-05	Cep85
1.738	4.313	0.02342	Abcg3
1.901	0.7211	0.0109	Phf11
1.92	0.9624	0.01085	Gm7644
1.977	3.601	0.0003731	Rasgrf2
2.029	4.709	0.0006138	Ccdc192
2.077	2.368	0.007918	Slc25a21
2.089	0.6484	0.006409	Gm3055
2.097	1.302	0.03461	4930447K03Rik
2.138	5.313	0.0113	Mrc2
2.21	0.6357	0.006607	Igsf9
2.321	4.225	0.00201	Ulk4
2.43	0.827	0.006688	C130046K22Rik
2.515	0.3373	0.01065	Gm26641
2.772	0.3353	0.03147	Numbl
2.879	1.282	0.0002048	Stpg1
2.977	0.5249	0.002622	Zc2hc1a
3.001	2.623	0.01188	Gm43821
3.047	1.034	0.01285	Gm42031
3.072	0.4535	0.03855	ENSMUSG00000121092
3.184	3.349	0.006983	Samd4
3.412	0.9325	0.0006138	Naip3-ps1
4.31	2.536	0.03082	4930481A15Rik
4.381	0.3633	0.002389	Fgf2
4.648	0.4799	0.007631	Zfp125
4.881	2.352	0.01462	Mpp7
5.308	-0.1647	0.0008634	1700030C10Rik - ENSMUSG00000099759
5.447	2.108	0.01004	ENSMUSG00000121318
5.522	-0.9311	7.052e-06	Cldn34c1
7.499	6.284	4.484e-11	Atp8a2
0.4289	4.79	0.05001	Prmt9
2.475	3.351	0.05001	Ston1
-0.4013	10.1	0.05004	Itm2b
-0.5111	3.898	0.05008	Prmt1
-0.4183	7.189	0.05018	Ptma
0.5457	3.018	0.05018	Zdhhc16
-0.3685	6.065	0.05023	G3bp1
0.3593	7.838	0.05024	Nr3c2
-0.9274	1.301	0.05024	Bloc1s4
0.4727	6.148	0.05026	Cdk17
0.341	5.662	0.05026	Flcn
-0.8194	2.664	0.05028	Tomm7
0.3472	5.748	0.05031	Msantd2
-0.8033	5.095	0.05032	Rpl9
-0.2673	6.434	0.05039	Zbtb18
-0.6372	5.194	0.05068	Rpl31
-0.3668	5.898	0.05068	Pttg1ip
-0.4365	4.58	0.05084	Hspa13
-0.384	8.948	0.0509	Myh9
0.2653	8.758	0.05094	Slc12a6
-0.6801	7.798	0.05094	Gcnt1
0.536	3.7	0.05107	2610044O15Rik8
-0.4414	4.392	0.05128	Nedd8
0.9484	1.443	0.0513	Acsbg1
-1.286	3.627	0.05132	Igfbp4
0.803	2.544	0.05132	Tex9
0.3966	6.195	0.05132	Trim12a
-0.3647	6.089	0.05156	Rab5c
0.4102	4.867	0.05156	Zfp672
0.8864	1.369	0.05174	Zfp85os
-0.6994	2.945	0.05185	Tmcc3os
-0.35	6.071	0.05201	Rybp
-0.2956	8.81	0.05201	Msn
-0.4587	4.243	0.05222	Btf3
-0.5908	3.708	0.05236	Dpagt1
-0.8241	6.121	0.05236	Srgn
-1.168	1.693	0.05236	Rilpl2
-0.6799	3.862	0.05242	Arhgef3
0.2859	6.007	0.05251	Mink1
0.9137	1.989	0.05251	Kyat1
0.4349	4.925	0.05261	Meis1
0.2966	6.373	0.05261	Lonp2
-0.3875	5.052	0.05265	Ppp2r1a
0.5745	3.198	0.05268	9930104L06Rik
-0.8298	3.603	0.05268	D630045J12Rik
-0.2912	6.827	0.0528	Ctnnb1
-0.6366	3.657	0.05285	Gng5
-0.7324	4.197	0.05285	Plk3
0.2873	5.644	0.05286	Stim2
0.361	9.974	0.05286	Fhit
-0.4939	4.538	0.05287	Mafk
1.03	2.821	0.05321	Klhl12
-0.3677	4.981	0.05325	Map1lc3b
0.5402	3.249	0.05329	ENSMUSG00000121500
-0.6702	3.779	0.05364	Kcnip1
-0.5063	3.625	0.05401	Cyc1
-0.4672	7.625	0.05426	Ywhah
0.3293	5.348	0.05429	Anks3
-0.387	6.281	0.0544	Nucks1
-0.4755	5.811	0.0544	Lat2
0.2573	7.816	0.0544	Fam193a
-1.303	1.614	0.0544	Mrpl57
0.2616	7.478	0.0544	Nfat5
0.4869	3.812	0.05446	Kantr
-0.259	6.727	0.05456	Ralb
-0.8826	2.406	0.05456	A130010J15Rik
0.5586	5.043	0.05474	Fam3c
0.3197	5.675	0.05482	Atxn3
-0.4048	3.863	0.05489	Nupl2
0.2585	7.497	0.05489	Psme4
2.887	4.571	0.05489	Abcc1
-0.5051	4.82	0.05489	Emc7
-1.557	0.5598	0.05489	ENSMUSG00000120462
0.9956	1.504	0.05489	Tle2
0.5001	6.059	0.05514	Nr1d2
-0.6128	3.242	0.05517	Nme1
-0.9522	2.881	0.05517	Col25a1
-0.3779	5.997	0.05521	Clptm1
0.2482	6.642	0.05534	Spata5
-0.423	4.404	0.05547	Tprgl
0.2786	5.946	0.05548	Qser1
-0.5315	3.326	0.05564	Mrpl17
0.4216	5.822	0.05564	Dop1a
0.2975	6.225	0.05564	Ubxn7
0.2856	9.337	0.05564	Tns3
-0.7472	3.548	0.05564	Serpinf1
0.3026	6.464	0.05574	Ino80
-0.6612	3.433	0.05574	Higd2a
-0.5298	7.798	0.05574	Cd164
-0.7899	1.933	0.05574	Timm8b
-0.3495	6.686	0.05582	Usp6nl
0.4879	5.28	0.05582	Mcur1
0.2387	7.044	0.05582	Nrd1
-0.4237	4.57	0.05594	Phf23
-0.6222	3.031	0.05594	Gm4221
0.3242	5.392	0.05595	Rnmt
0.5234	3.751	0.05597	Lrrc39
-0.6128	3.674	0.05647	Nans
0.2799	8.004	0.05647	Map3k3
-0.7914	3.007	0.05647	Cox5b
0.2547	6.852	0.05657	Ranbp9
-0.6072	5.254	0.05667	Tnfaip3
-0.4009	7.677	0.05675	Hnrnpk
-0.5826	3.194	0.05693	Plxna4os1
0.4919	4.459	0.05694	Gm16759
-0.4601	4.412	0.05694	Cdk4
0.2704	7.646	0.05698	Rbm26
0.3588	7.528	0.05698	Osbpl11
-0.3585	4.94	0.05698	Rabgef1
0.3581	5.768	0.05698	Inpp5k
-0.3433	6.419	0.05698	Ssr1
0.2707	6.074	0.05698	Txndc11
-0.3977	3.898	0.05728	Ccndbp1
0.3091	5.844	0.05728	Trmt1l
-0.6679	2.893	0.05728	Gm21974
-0.6935	2.562	0.05728	Mrpl30
0.446	4.675	0.05728	Mrps27
-0.2954	6.187	0.05743	Amfr
0.3352	5.801	0.05743	Rassf8
0.6788	3.768	0.05743	Ang
0.4293	4.914	0.05745	Cir1
-0.4612	4.851	0.05746	Pdha1
-1.089	1.704	0.05746	Scand1
-0.2551	6.635	0.05746	Rassf5
0.2951	7	0.05746	Ubr2
0.3257	5.93	0.05746	Eya3
0.4791	5.031	0.05746	Parp6
-0.4369	4.076	0.05754	Gpx4
-0.419	5.28	0.05787	Morf4l2
-0.7688	3.143	0.05801	Gm41804
0.4982	3.434	0.05801	Nsdhl
-1.333	0.9823	0.05806	Rapgefl1
0.2642	7.264	0.05806	Svil
-0.7593	6.92	0.05827	Etv5
-0.865	2.669	0.05884	Snu13
-0.3829	5.323	0.05884	Myo1c
0.9739	3.34	0.05884	Slc35d2
1.107	0.6648	0.05884	Tagln3
-0.5525	2.808	0.05884	Ap5b1
-0.3409	12.05	0.0589	Hexb
1.701	0.4719	0.0589	Dact3
0.3722	4.254	0.05894	Ptch1
-1.349	0.7173	0.05894	Gm44751
0.4109	5.04	0.05894	Pde6d
-0.5392	4.251	0.05894	Edf1
0.5578	3.225	0.05907	Tulp3
-0.3504	4.962	0.05915	Rab1b
-0.4637	5.527	0.05921	Slc25a25
-1.178	1.382	0.05921	Art3
-1.309	1.514	0.05931	Fdx2
-0.7863	1.785	0.05932	0610009L18Rik
-1.197	1.06	0.05944	Zfp185
0.2389	7.606	0.05954	Map2k5
0.5169	3.462	0.05986	Epm2aip1
0.4488	4.666	0.05986	Zbtb40
0.9392	1.36	0.05986	Rpgrip1
-0.7879	1.742	0.05988	Med29
0.3302	5.082	0.05998	Kdsr
-1.166	1.193	0.06005	Smim35
0.7707	2.128	0.06005	Pla2g7
-0.377	6.114	0.06005	Gclc
-0.3709	6.201	0.06005	Ccdc47
-0.6223	2.59	0.06007	Mrpl16
0.3063	8.241	0.06012	Bcas3
-0.3395	4.73	0.06012	Tspyl1
-1.635	3.72	0.06013	Ptger3
-0.6679	3.222	0.06013	Srrd
-0.2666	6.155	0.06013	Plod3
-0.5414	3.97	0.06013	2410006H16Rik
-0.3636	4.678	0.06041	Puf60
-0.4938	5.664	0.06042	Dnajb11
-0.3353	5.278	0.0605	Zfp24
0.2908	9.03	0.06052	Marchf1
-0.4528	5.074	0.06073	Chmp1b
-0.4508	4.233	0.06073	Pabpc4
-0.3719	6.644	0.06073	Tgoln1
0.596	4.945	0.06073	Foxn2
-0.2781	6.418	0.06081	Rad21
-0.2506	8.991	0.06104	Cltc
0.282	7.925	0.06104	Rassf2
-1.209	1.645	0.06124	Cenpf
0.2471	7.979	0.06124	Rbm6
0.2579	7.071	0.06131	Pik3ca
0.3087	5.33	0.06135	Clcn7
1.109	1.178	0.06141	Gm13187
0.4799	3.971	0.06162	Lmbr1l
0.6923	3.074	0.06162	Miip
-0.8267	3.46	0.06162	Oaf
0.8423	2.092	0.06166	Gm42549
0.3453	5.437	0.06166	Rprd1a
-0.2822	6.523	0.06166	Sec62
0.5204	3.669	0.06166	Zfp420
0.3395	5.468	0.06182	Golga1
0.8736	3.244	0.06182	Raph1
0.533	6.88	0.06184	Gm4258
-0.3035	5.429	0.06184	Nrbp1
0.3698	7.057	0.06188	Cept1
0.4124	4.618	0.06188	5730480H06Rik
0.6636	2.29	0.06188	Snhg20
-0.2847	7.69	0.06188	Ehd4
0.5798	3.096	0.06197	Rnaseh2c
0.3733	4.365	0.06201	Rab2b
-0.3734	4.609	0.06204	Actr1b
0.4283	5.553	0.06204	H2bc6
-0.5395	3.058	0.06222	Comtd1
0.2701	6.225	0.06222	Ttc13
0.3657	6.754	0.06227	Npnt
0.5155	3.513	0.06255	Sfxn4
-0.5779	2.984	0.06264	Chrac1
0.2574	6.005	0.06264	Zkscan3
-0.3705	5.693	0.06266	Zdhhc5
-1.124	1.563	0.06276	ENSMUSG00000120931
-0.3316	7.643	0.06279	Rhoh
-0.4491	5.498	0.06299	Gabarap
0.4152	4.712	0.06299	Ppp4r1l-ps - ENSMUSG00000055897
-0.2684	8.037	0.06299	Nptn
1.145	1.772	0.06301	Gm15991
0.4972	5.089	0.0633	Smg9
-0.9405	1.453	0.06347	Etohd2
-0.3709	5.395	0.06347	Rsl1d1
0.5842	3.091	0.06347	Klhl8
-0.683	7.991	0.06369	Hspa5
0.2752	6.912	0.06382	Rufy3
0.9785	1.523	0.06382	Pcdhga2
0.2531	7.062	0.06385	Akap10
-0.6405	3.64	0.06385	Ndufs8
2.271	1.049	0.06385	Pde2a
1.748	2.199	0.06396	Enpp4
0.8383	2.649	0.06396	2610005L07Rik - ENSMUSG00000071793
0.311	5.647	0.06396	Rbm28
0.4298	6.103	0.06396	Cbfa2t3
0.2277	6.876	0.06396	Eea1
-0.3805	5.161	0.064	Taldo1
0.313	4.949	0.06409	Atl2
-0.3048	5.489	0.0641	Ppp1r15b
-0.3815	7.911	0.0641	Rasal2
-1.018	3.724	0.0641	ENSMUSG00000121207
0.3071	4.948	0.0641	Fbxl12
-0.4047	8.082	0.06416	Rhob
-1.365	3.666	0.06429	Ccrl2
0.4407	3.896	0.06452	Sntb2
0.9571	2.038	0.06454	Asb10
-0.4018	4.638	0.06454	1810030O07Rik
-0.2376	8.233	0.0646	Slc29a3
1.071	0.4559	0.06475	ENSMUSG00000119980
1.013	2.96	0.06475	Rell1
0.4165	5.062	0.06477	Tshz1
-0.2873	7.432	0.06477	Caprin1
0.4367	3.77	0.06486	Adamts10
-1.151	3.093	0.06493	Ccl12
-0.2945	5.512	0.06493	Pycard
-0.2993	6.158	0.06493	Derl1
0.6688	2.932	0.06493	Dhtkd1
-0.2565	7.927	0.06493	Skil
0.3275	7.999	0.06493	Washc4
0.968	1.763	0.06505	Tspan32os
-0.4918	5.029	0.06547	Selenok
-0.3504	4.848	0.06553	Yipf6
-0.2954	5.82	0.06582	Ripk2
-0.2899	5.137	0.06582	Ganc
0.5018	6.022	0.06583	Rab11fip5
0.2885	6.667	0.06589	Phka2
0.7273	2.031	0.06589	Lime1
0.5744	3.407	0.06589	Fastkd1
0.2951	9.049	0.06589	Lhfpl2
0.2728	9.909	0.06589	Gm2629
0.4057	4.64	0.06592	Birc2
-0.3336	5.652	0.06605	Cnpy3
0.7474	1.487	0.06617	Gstm1
0.2336	6.944	0.06629	Mib1
-0.9519	2.006	0.06635	Samd1
-0.3148	6.124	0.06652	Wdfy1
-0.5903	4.681	0.06652	Srgap3
-1.186	1.206	0.06677	Gm56077
-1.101	0.7715	0.06677	Prr7
-1.376	4.365	0.06679	Arhgap27os3
0.3836	4.472	0.06681	Nae1
1.055	1.015	0.06687	Nudt12
0.6514	4.182	0.06687	Ccdc85c
0.3023	5.999	0.06687	Aebp2
-1.86	1.199	0.06687	Hcar2
0.4081	4.135	0.0669	Hdhd5
-1.41	1.325	0.0669	Gadd45g
0.4782	5.804	0.06697	Tmc7
-0.3045	6.98	0.06709	Hnrnpl
0.3109	5.529	0.06741	Gbgt1
-0.3333	5.247	0.06757	Dusp7
-0.5074	3.309	0.06764	Snrpc
0.2451	7.181	0.06769	Zup1
0.3912	8.196	0.06769	Rcbtb2
0.8769	2.259	0.06793	4930405A10Rik
0.5635	3.564	0.06802	Lhpp
-0.7529	2.106	0.06825	Zfp536
-0.8198	2.2	0.06834	Gimap9
0.2953	5.832	0.06879	Sclt1
0.2527	7.463	0.06879	Snx30
0.9448	1.694	0.06894	Gins3
0.3195	5.844	0.06894	Parp4
0.3546	5.343	0.06894	Ndufaf2
0.7029	3.209	0.06894	Eml5
-0.8338	1.906	0.06894	9630010A21Rik
-0.2396	7.882	0.06894	Tnfrsf11a
-1.396	1.713	0.06902	1700020N01Rik
0.2892	10.26	0.06909	Dst
0.4583	3.781	0.06948	Acsl3
0.3513	4.901	0.06948	5830417I10Rik
0.6805	8.025	0.06952	Tbc1d9
-3.002	0.9414	0.06952	Parpbp
-0.4207	5.772	0.06965	Lman2
0.221	7.288	0.06974	Ankhd1
-0.4308	6.419	0.06981	Rnls
-0.2631	7.152	0.06981	Csnk1e
-0.7686	3.157	0.06982	Elob
-0.4064	4.314	0.06997	Bub3
0.2806	7.872	0.07016	Tmcc1
-0.7621	2.417	0.07016	Rex1bd
0.3992	5.682	0.07016	Hace1
-1.084	0.9783	0.07016	Gm13008
-0.8728	2.348	0.07016	Mtln
-0.592	4.328	0.07016	Nrbf2
-0.8262	1.915	0.07019	Xkr4
0.3127	5.178	0.0702	Phf10
0.4054	4.327	0.0702	Trmt6
-0.8546	1.713	0.07031	Emp2
-0.3133	4.859	0.07043	Trappc3
-4.153	1.657	0.07047	Pianp
-0.6077	8.336	0.07047	Calr
-0.901	1.733	0.07047	Sf3b5
0.2898	6.168	0.07052	Tbcd
0.6604	2.569	0.07052	Fgf1
-0.566	6.01	0.07052	Rpl5
0.3654	4.871	0.07052	Ero1b
0.2741	8.589	0.07059	Kansl1
3.538	6.403	0.07064	Nrp1
0.235	6.921	0.07064	Fam120a
1.068	0.8241	0.07064	Dut
0.6565	2.945	0.0707	Zfp783 - ENSMUSG00000072653
0.6977	2.522	0.0707	Rsl1
-0.4903	3.674	0.07077	Naf1
-0.7254	3.127	0.07077	Cebpd
0.7471	1.613	0.07077	Fut9
0.4516	5.24	0.07077	Mllt6
0.8509	1.403	0.07077	Slc22a14
0.262	6.952	0.07077	Traf5
0.2787	5.78	0.07077	Atm
-0.4994	7.689	0.07077	Gspt1
-0.3739	6.591	0.07078	Sdf4
-0.238	7.353	0.07086	Camk1
-0.576	3.37	0.07086	Snrnp35
0.2414	7.126	0.07086	Slf2
-0.7613	3.179	0.07099	Fam149a
0.3746	3.897	0.0711	Pnpla6
-0.6468	2.886	0.0711	Mrpl43
-0.5779	3.358	0.07115	ENSMUSG00000120863
-0.6387	4.033	0.07115	Ckap4
0.3714	3.856	0.07115	Pdcd2l
0.2509	6.227	0.07115	Rmnd5a
0.3236	7.38	0.07115	Epsti1
0.6095	2.171	0.07115	Zfp235
0.4437	5.81	0.07122	Narf
0.6326	2.738	0.07141	Rsad1
-0.2602	5.895	0.07159	Uba1
-0.761	2.931	0.07159	Zfp458
0.3074	6.12	0.07176	Lyrm4
-0.4098	6.414	0.07179	Magt1
-0.595	3.154	0.07208	Ddah2
0.4463	4.834	0.07208	Mettl8
1.251	0.9478	0.07216	Ap1s3
0.2649	9.992	0.07217	Zbtb20
-0.6953	2.982	0.07223	Trmt112
-0.7203	2.539	0.07238	Med11
0.2528	7.167	0.07249	Atad2b
0.5689	3.269	0.07256	Ift81
0.4702	3.463	0.07257	Aasdh
1.23	11.21	0.07264	Lrmda
-0.4575	4.403	0.07265	Txndc5
0.2287	8.105	0.07265	Notch2
0.274	6.373	0.07268	Riok3
1.905	2.052	0.0727	Adssl1
0.3404	4.667	0.0727	Prepl
0.2347	8.112	0.0727	Pkig
0.471	5.355	0.07274	Rttn
0.3426	6.868	0.07274	Baz1a
0.4698	3.908	0.07274	Alms1
-0.5275	4.464	0.07274	Cbx4
-0.6211	2.609	0.07274	ENSMUSG00000121114
-0.6881	5.995	0.07281	Rpl17
0.8082	2.782	0.07281	Ift122
0.3303	5.627	0.07306	Txndc16
0.8431	4.211	0.0731	S1pr1
-1.351	0.7738	0.0731	ENSMUSG00000120101
-0.7568	1.791	0.07316	Hcfc1r1
-0.2961	5.261	0.07316	Bag6
0.3242	5.207	0.07318	Scarb1
0.2636	6.616	0.07319	Trappc8
-0.4329	4.423	0.07319	ENSMUSG00000120081
0.2378	6.797	0.07319	Pds5b
-0.518	3.861	0.07352	Spcs1
-0.2285	6.729	0.07352	Clstn1
0.7515	1.541	0.07356	Gm44502
-0.4462	4.32	0.07378	Atic
0.3884	9.523	0.07408	Arhgap22
-0.3763	5.239	0.07408	Slc39a10
1.153	0.5842	0.07408	Gm27027
-0.5818	3.363	0.07408	Psenen
-0.9097	1.465	0.07421	Riox1
-0.3622	4.335	0.07422	Ticam2
0.3752	6.502	0.07424	Zfp950
-0.6399	2.878	0.07431	Zbtb22
-0.3266	4.765	0.07431	Mtfr1l
-1.207	1.46	0.07431	Ier3
-0.3923	4.805	0.07431	Arl5b
-0.72	9.214	0.07439	Filip1l
-0.3121	6.017	0.07439	Arl6ip5
0.3737	5.252	0.07443	Immp1l
0.3294	4.858	0.07449	Ago4
0.4886	3.793	0.07451	Myom1
0.5753	2.739	0.07459	Dnmt3b
0.62	2.79	0.07459	Kcnj9
0.4077	5.343	0.07459	Zwint
0.3797	6.684	0.07475	Tbc1d8
-0.5755	3.045	0.07488	Gm49380
0.2302	7.673	0.07492	Znrf1
0.5279	4.584	0.07524	Adamts6
0.2833	6.475	0.07524	Slc49a4
-0.3034	7.242	0.07524	Mob1a
-0.4603	6.432	0.07524	Atp5b
-0.6661	2.547	0.07524	Zfp46
-0.5254	2.895	0.0756	Pla2g12a
-0.4804	3.678	0.0756	Sigmar1
0.4267	4.812	0.0756	Dtd1
0.3988	4.469	0.0756	Zadh2
-0.6646	4.18	0.0756	Gm42962
-0.6542	3.06	0.07586	Pgp
-0.9059	1.385	0.07597	ENSMUSG00000120171
0.2909	7.103	0.07597	Trpm7
-0.2155	8.143	0.07597	Ptp4a2
0.5745	6.057	0.07597	mt-Nd5
0.3724	5.039	0.07597	Tbc1d32
-0.5505	2.582	0.07636	Rhoc
0.2122	10.03	0.07638	Diaph2
-0.4046	4.995	0.07638	Ppp2r1b
0.6247	4.878	0.07638	Catspere2
-0.3775	5.617	0.07638	Cdc37
-0.6164	5.574	0.07638	Sgip1
-0.4128	4.086	0.07638	Cops6
0.8875	1.134	0.07638	Cadm4
-0.2863	5.493	0.07638	Cat
0.542	4.175	0.07638	Ppargc1b
0.2575	7.856	0.07648	Ep300
-0.4111	4.816	0.07648	Sfr1
0.2687	6.061	0.07648	Chm
3.385	4.495	0.07648	Ppfia4
0.2268	7.219	0.07655	Dmxl1
-0.4267	3.869	0.0766	Tesk1
-0.3049	5.119	0.07677	Fam20b
-0.7258	2.579	0.07677	Eaf2
-1.052	0.6227	0.07711	Rap1gap
0.2697	6.477	0.07717	Nbeal1
0.6855	2.392	0.07717	Zfp382
0.3091	6.399	0.07724	Lrrfip2
-1.68	1.666	0.07732	Lzts1
-0.7073	4.039	0.07734	Cebpb
-0.2446	7.167	0.07734	Sft2d2
0.3406	4.874	0.07748	Dedd
0.2224	7.425	0.07754	Zfr
0.2172	8.044	0.07754	Vps13b
-0.445	3.684	0.07754	Dok3
-0.5876	5.136	0.07773	Rpl24
-0.2542	5.704	0.0779	Tmem50b
0.2772	7.351	0.0779	Mthfs
-0.2932	7.249	0.07796	Atp6v0a2
-0.333	5.351	0.078	Srsf9
0.2109	7.93	0.07826	Rai1
-0.3926	4.27	0.0783	Ddx54
-0.3068	4.919	0.07832	Por
-0.292	7.205	0.07832	Clta
0.7353	2.642	0.07839	Mettl22
-0.645	4.32	0.07839	4933421O10Rik
0.2501	6.099	0.07839	Scfd1
-0.4681	4.343	0.07839	Drap1
0.2158	6.503	0.07839	Ikbkb
0.2889	5.18	0.07851	Orc2
-0.8774	1.692	0.07853	Map10
0.288	6.473	0.07853	Reps1
-0.3032	6.177	0.07856	Zcchc24
-0.4929	3.244	0.07866	Hmox1
0.2755	6.84	0.07895	Sfswap
-0.6073	2.292	0.07895	9130023H24Rik
0.2647	5.913	0.07895	Cdc123
0.2728	6.258	0.07914	Atf2
0.2762	7.81	0.07914	Arhgap12
0.303	7.695	0.07929	Eri3
0.7931	1.364	0.07933	Zfp521
0.7129	2.052	0.07947	Gm572
-0.242	7.729	0.07947	Daglb
-0.4679	4.985	0.07947	Tgif1
0.3361	6.41	0.07949	Galk2
0.3314	6.338	0.07949	Rps6kb1
0.3236	6.821	0.07958	Trim2
0.5349	3.54	0.07994	Patj
-1.424	2.555	0.08	Tnf
-0.8132	2.206	0.08012	Nudt18
-0.5888	2.625	0.08015	Zfp51
0.2483	8.036	0.0802	Mllt10
-0.3422	6.309	0.0802	Clic1
-0.5366	2.771	0.0802	Retsat
-0.2811	5.571	0.0803	Themis2
-0.3711	4.269	0.08033	Cnot9
-0.5745	4.779	0.08033	Eef1d
0.3793	3.974	0.08053	Zbed4
0.4467	3.448	0.08064	Nhej1
1.029	1.028	0.08075	Zfp660
-1.206	5.095	0.08089	Gm27008
-1.118	0.8726	0.08089	Kti12
-0.7974	2.093	0.08091	Tkfc
-0.7024	2.462	0.08094	ENSMUSG00000120261
0.2269	7.675	0.08113	Mon2
-0.6351	2.684	0.08116	Nup210l
1.31	0.9945	0.08129	Adam18
-0.3034	6.207	0.08129	Vmp1
0.8321	2.969	0.08129	Or5m3b
-0.4338	4.28	0.08129	Atp5h
0.2427	7.075	0.08129	Zzz3
0.2603	5.977	0.08129	Krit1
0.4329	5.016	0.08131	Anapc16
-0.7947	2	0.08152	Lhfpl4
0.2802	8.934	0.08154	Adap2
-0.4435	5.156	0.08167	Rps2
-0.7148	4.872	0.08167	Rpl35a
-1.154	0.5746	0.08171	ENSMUSG00000120240
-0.393	5.938	0.08175	Calu
-0.6276	2.807	0.08177	Ndufs6
-0.6794	2.235	0.08188	Gm15527
0.93	1.192	0.08188	Ajuba
0.4303	4.096	0.08194	Zfp329
0.2346	6.424	0.08202	Samhd1
-0.9016	1.395	0.08205	Mrps12
-0.4459	3.49	0.0821	2310033P09Rik
1.207	2.428	0.0821	Treml2
-0.3656	5.043	0.0821	Cln5
-0.5578	6.684	0.08214	P4hb
0.4299	4.517	0.08219	Rnpc3
0.2542	7.081	0.08219	Far1
-0.5499	3.576	0.08224	Psmb10
-0.4153	4	0.08252	Gclm
-0.4365	5.679	0.08259	Hyou1
0.2878	5.812	0.0826	Dnaaf9
-1.385	1.032	0.08276	ENSMUSG00000120387
-0.7051	3.3	0.08285	Gm44686
0.8822	2.431	0.08298	BC051142
-2.11	0.7525	0.08332	Gm4366
-0.3597	6.301	0.08346	Arpc5
-0.3523	6.605	0.08346	Dnajc3
0.4957	3.702	0.08346	Plekha7
0.4943	3.428	0.08346	Gm11696
-0.4333	4.952	0.08346	Tle5
0.4953	4.595	0.08346	Zfp992
-0.4323	3.617	0.0836	Ring1
-0.6255	3.698	0.08364	Erc1
-0.8099	1.782	0.08375	4930578M01Rik
-0.9007	1.629	0.08375	Tmem41a
-0.7733	1.943	0.08375	Ccnq
-0.3574	6.027	0.08377	Mat2a
1.11	3.001	0.08378	Gm5834
-0.6445	2.813	0.08408	Emc6
0.5914	2.805	0.08419	Tyw5
0.4373	3.864	0.08442	Jade3
-0.6273	3.103	0.08442	Taf13
-0.4058	4.409	0.08442	Rnf34
-0.3688	3.956	0.08442	Cyth2
-0.4747	5.162	0.08442	Selenos
0.336	5.848	0.08442	Dcaf6
-0.5595	3.184	0.08442	Polr2g
0.25	6.151	0.08442	Nemf
0.2668	6.254	0.08445	Gm26510
-0.5804	2.948	0.08446	Snhg1
0.3391	5.516	0.08468	Zhx3
0.2573	6.407	0.08474	Nnt - ENSMUSG00000025453
0.2817	6.726	0.08474	Safb2
0.3104	5.541	0.08477	Mbd2
-0.3337	6.806	0.08488	Pals2
0.6476	1.994	0.08496	Ankrd13b
-0.6446	5.602	0.0851	Furin
0.3614	4.927	0.08524	Tubgcp4
-0.9578	3.828	0.08546	Klhdc8b
-0.3897	6.303	0.08546	Ckb
0.443	4.589	0.08546	Fbxo8
-0.6803	5.614	0.08546	Rpl8
0.3301	5.127	0.08546	Agk
-0.4501	3.523	0.08546	Pdcd5
0.2705	6.185	0.08546	Il16
-0.2989	4.812	0.08555	Spg7
-0.5004	4.323	0.08555	Rbm8a
-0.7667	6.141	0.08555	Ube2e2
-0.2285	6.841	0.08564	Tmem59
-0.4599	3.41	0.08572	Atp5o - ENSMUSG00000022956
0.314	4.902	0.08586	Arl10
-0.6292	2.526	0.08586	Ndufa1
-0.3461	5.448	0.08606	Txlna
-0.3927	4.235	0.08624	Tmed2
0.2881	6.148	0.08624	Arhgef7
-0.618	4.982	0.08652	Rps17
0.9748	2.579	0.08652	Pvrig
0.5121	3.602	0.08652	Zfp846
-0.3215	4.85	0.08652	Ublcp1
-0.6929	2.827	0.08652	Gm44511
0.2978	5.064	0.08652	Clasrp
0.2965	5.99	0.08652	Usp40
-0.8978	1.047	0.08652	ENSMUSG00000120684
0.2531	6.577	0.08669	Slc36a1
0.268	7.06	0.08709	Cntrl
-0.4485	4.055	0.08711	Lamtor4
0.2708	6.131	0.08711	Upf2
0.2756	5.056	0.08711	Eif4enif1
0.3573	9.348	0.08711	Mitf
0.2687	5.91	0.08711	C9orf72
0.3424	4.639	0.08714	Dnajc21
-0.5572	2.671	0.08725	Tceal1
0.3893	4.131	0.08735	Itgb3bp
0.3205	5.086	0.08735	Zfp397
-0.3138	4.959	0.08735	Vps11
0.5553	2.894	0.08735	Gm47731
-0.3981	4.605	0.08753	Irf1
-1.511	3.158	0.08763	Gem
0.8115	3.216	0.08763	Dock6
-1.176	4.842	0.08769	Prkcq
0.2331	7.184	0.08772	Ago3
-0.5654	4.331	0.08779	Klk8
0.2303	7.024	0.08779	Ralgapa1
-0.4534	4.772	0.08787	Paics
0.9053	5.558	0.08796	Zfp984
0.334	4.951	0.08803	Smarcal1
-1.586	3.923	0.08803	Fosb
-0.2682	6.225	0.08804	Ppp3r1
0.3116	4.342	0.08816	Lamc1
0.8664	2.924	0.08816	Prkab2
-0.5947	2.824	0.08816	Tubb4b
-0.2428	6.471	0.08817	Ubqln1
-0.6449	2.219	0.08819	Kif1a
-0.4415	3.454	0.0885	Oxsm
0.5956	4.929	0.08865	Alpk1
-0.5	3.483	0.08865	Rfk
0.6377	2.413	0.08865	Zfp850
0.5659	2.955	0.08865	Gm12359
-0.6515	2.293	0.08865	Zfp641
-0.6128	2.608	0.08865	Psmd10
0.23	6.957	0.08865	Pepd
0.3635	4.878	0.08865	Sec61a2
-0.2938	6.573	0.08865	Kras
-0.9202	5.042	0.08865	Nfkbiz
-3.977	0.363	0.08865	G530011O06Rik
0.2743	6.745	0.08865	Chd1
0.2016	8.819	0.08865	Zcchc7
0.2873	6.173	0.08868	Foxj3
-0.2879	5.393	0.08871	Zkscan1
0.3073	5.188	0.0888	Lnpk
0.4347	4.858	0.08882	Uhrf1bp1l
0.2985	6.866	0.08892	Camta1
1.026	0.7805	0.08892	Trip13
-1.367	0.4853	0.08906	Gm49625
0.6367	2.466	0.08906	Smug1
0.3598	4.14	0.08913	Gm49336
0.5763	3.687	0.08926	Bnip3
0.3344	8.885	0.08944	Man1c1
0.2647	5.857	0.08944	Pi4kb
0.3055	5.379	0.08944	Nupl1
0.249	7.79	0.08944	Herc1
0.2502	5.828	0.08944	Trit1
0.3538	4.914	0.08944	Gtf2a2
-0.3061	5.754	0.08944	Ppp1r2
0.3243	7.829	0.08944	Fnip2
-0.5947	1.876	0.08944	Wdr5b
-0.7633	1.542	0.08944	Rnf227
0.3217	4.378	0.08944	Zfp60
0.5783	5.542	0.08944	Ndst1
-0.6553	2.184	0.08944	Pfdn4
0.4201	4.064	0.08944	Timm9
-0.3028	4.833	0.08957	Mnt
-0.275	6.575	0.08958	Klhl6
-0.9956	1.863	0.08959	Aprt
-0.2401	6.659	0.08964	Rdx
-0.2244	7.284	0.08972	Rab1a
-0.3721	4.27	0.08973	Ebag9
0.3744	4.361	0.08992	Fbxo9
0.9437	1.087	0.08992	Gm44777
0.4262	4.053	0.08992	Mapre3
1.143	1.424	0.09003	Nexn
-0.7349	2.051	0.09003	Gm16897
-0.3065	5.979	0.09003	Irf2bp2
-0.9172	1.037	0.09003	Gm48882
0.2995	5.743	0.09003	Klhl3
0.2287	6.809	0.09003	Relch
0.3106	6.254	0.09003	Vps13a
0.5303	3.457	0.09031	Snx16
-0.4844	4.272	0.09031	Tmed3
0.2794	5.152	0.09057	Capn15
0.7477	3.754	0.09068	H2-M3
-0.3013	5.086	0.09068	Samd4b
0.8	1.901	0.09068	Gm15608
-0.7426	2.615	0.09068	ENSMUSG00000119955
-0.3797	6.583	0.09068	Cnbp
-0.5312	4.219	0.09068	Zc3h12a
-0.4884	3.022	0.09068	Gm44899
-0.6851	3.003	0.09091	Mrps14
0.3534	4.492	0.09099	Mier3
-0.7621	2.338	0.09129	ENSMUSG00000120360
0.4521	4.276	0.09133	Dgka
0.8165	1.651	0.09134	1190007I07Rik
-0.375	3.871	0.09151	Mzt2
-0.4002	7.021	0.09151	Lrrc3
-0.3234	5.581	0.09151	Fuca2
0.4392	5.476	0.09151	Parp12
0.3257	4.579	0.09161	Glmn
0.2346	7.408	0.09161	Mia2
0.2726	5.383	0.09197	Arntl
-0.265	6.066	0.09197	Rhog
0.4461	3.38	0.09227	Aplf
-0.8317	2.205	0.09227	Prr5
0.3566	3.672	0.09236	Pef1
0.3167	4.752	0.09262	Mtx3
-0.8422	1.756	0.09265	ENSMUSG00000120313
-0.5108	3.501	0.09278	Prdx3
0.3817	4.639	0.09278	Mto1
-0.3458	4.977	0.09278	Nacc1
-3.418	0.946	0.09278	Ang4
0.2366	6.339	0.09278	Rhot1
-0.2883	5.32	0.09278	Spty2d1
0.3096	7.81	0.09278	Gsap
-0.3616	4.445	0.09278	Gm31763
-0.442	3.654	0.09283	Uqcrh
-0.3979	5.201	0.09283	Lrp10
-0.5534	4.249	0.09289	Cox8a
-0.8352	1.855	0.09289	Hspb3
-1.136	1.151	0.09293	Emp3
-0.9815	0.8115	0.09302	Mycbpap
-0.6589	3.147	0.09313	Trim17
0.9481	3.893	0.09349	AY512915
0.3697	4.576	0.09351	Deptor
-0.4265	4.379	0.094	Otub1
-0.6286	3.778	0.09414	Creld2
-0.4338	4.161	0.09426	Mydgf
0.3207	5.14	0.09426	Mipol1
0.2655	5.134	0.09426	Sympk
-0.569	2.483	0.09426	Pcyox1l
-0.3698	5.894	0.09426	Uhmk1
0.256	6.016	0.09435	Zranb2
0.5158	3.935	0.09451	Gpd2
-0.383	4.698	0.09451	Midn
0.7326	1.633	0.09451	Gm17160
-0.2149	8.551	0.09451	Adam10
0.263	5.027	0.0948	Sec24d
0.2905	7.288	0.0948	Scaper
0.4533	4.474	0.0948	Bcorl1
0.2666	6.846	0.0949	Pibf1
-0.4296	4.488	0.0949	Tsen2
0.2505	5.987	0.09496	Ddx50
0.2043	6.932	0.09501	Pacs2
0.3158	5.295	0.09504	Zbtb44
0.3298	4.761	0.0951	Ttc19
-0.5222	3.433	0.09527	Slc30a1
-0.6475	3.282	0.09527	Txn1
-0.4749	3.035	0.09553	Gm20089
-0.6323	2.453	0.09553	Gm13684
0.1971	7.468	0.09566	Nlk
-0.3631	4.369	0.09566	Rnf7
-0.5382	3.457	0.0957	ENSMUSG00000120144
0.9384	6.376	0.09581	Rbfox1
-0.7251	3.453	0.09581	Bcl2a1a
-0.419	6.886	0.0959	Eif4a1
1.564	6.211	0.09599	Niban1
-0.6089	2.686	0.09599	Snhg5
0.3119	5.228	0.09599	Fam185a
-0.5139	3.388	0.09599	Ndufb7
0.198	7.058	0.09605	Ylpm1
0.3923	3.324	0.09612	Gm21811
0.3357	4.377	0.09637	Zfp81
-0.3531	4.371	0.09637	Gmeb2
-0.5746	2.919	0.09637	Ctps
0.2229	6.972	0.09637	Rnf38
-0.6453	4.492	0.09637	Ccdc62
0.3833	5.109	0.0965	2810004N23Rik
0.3646	4.812	0.09656	Rfwd3
0.2436	6.607	0.09661	Otud7b
-0.4455	4.045	0.09661	Chml
0.2828	6.326	0.09661	Foxk2
-0.8118	1.525	0.09661	Gm20492
0.5925	2.247	0.09697	A230072C01Rik
-0.4615	2.848	0.09702	Rfesd
-0.724	1.351	0.09702	Bola1
-0.6511	1.86	0.09707	0610012G03Rik
-0.2188	8.63	0.09719	Abi3
-0.2833	4.571	0.0972	Snapin
-0.3302	5.175	0.0972	Tlr9
-1.077	2.498	0.09754	Or5v1
0.2462	5.595	0.09754	Ngly1
-0.6052	2.54	0.0978	H2-DMb2
-0.3697	4.922	0.0978	Zfp40
0.2315	6.243	0.0978	Jak2
-0.3471	5.123	0.09791	Psmd2
0.7996	1.515	0.09798	Kif15
-0.3005	4.997	0.09808	Ythdf1
-0.5745	2.155	0.09822	Tmem120a
-1.296	0.7659	0.0983	Ccl2
-0.5548	3.19	0.09841	Pgpep1
-0.2484	5.907	0.09851	Pip4k2b
-0.2973	5.924	0.09858	Nono
-0.3034	6.667	0.09858	Akr1a1
0.2874	5.668	0.09858	Rasa2
0.3534	3.76	0.09864	Spns1
0.245	7.287	0.09873	Bicra
-0.6148	2.779	0.09885	Tmem141
-0.4502	4.455	0.09885	Hspe1
-0.465	3.993	0.09885	Elovl1
0.7357	1.536	0.09903	Mapk4
0.3776	7.267	0.09952	Sgk3
[truncated: 55,011 more rows]

## Sheet: DE-6_Fibroblast
logFC	AveExpr	p_val_adj	gene_names
3.044	6.003	0.0001473	Atp8a2
4.401	3.868	0.001776	Fcrls
2.887	3.915	0.002587	ENSMUSG00000120400
1.549	7.247	0.002587	Pip4k2a
-1.554	6.097	0.002676	Ubc
1.879	6.132	0.002676	Bin1
-1.644	5.631	0.00279	Cdo1
1.465	5.354	0.00279	Cers6
-1.06	9.604	0.00297	Gm15564
-2.533	4.556	0.00297	Msln
1.505	6.516	0.00297	Bmp2k
2.827	4.37	0.00297	Rtn4rl1
2.353	5.258	0.00297	Sh3kbp1
2.394	4.22	0.002997	F11r
2.204	4.261	0.002997	Whrn
0.9181	7.95	0.003015	Prkca
1.499	6.118	0.003015	Chd7
2.012	5.79	0.003015	Ppp1r9a
3.254	2.393	0.003019	Wscd1
2.28	4.547	0.003019	Akap6
2.296	4.845	0.003019	Prkch
-1.472	6.091	0.003019	Ctxn3
3.245	5.402	0.003103	Gm2629
1.81	5.29	0.003128	Arhgap39
2.168	3.571	0.003128	Tnfrsf1b
2.97	5.886	0.003131	Chn2
3.349	2.95	0.003131	Nlrc5
1.712	6.107	0.003131	Pik3ap1
3.566	3.002	0.003614	Sla
3.334	2.129	0.003862	Gm26510
1.261	9.332	0.003862	Pde7b
2.459	3.902	0.003862	Eya4
2.089	3.385	0.003911	Tm6sf1
2.687	3.373	0.003911	Emcn
3.896	3.264	0.003982	Epsti1
2.356	4.297	0.004176	Cmklr1
0.9601	7.759	0.004566	Picalm
2.149	8.047	0.004622	Elmo1
3.027	3.181	0.004622	Nrros
1.63	5.916	0.004622	Apba1
3.224	2.605	0.004622	Tmem273
2.884	3.654	0.004622	A630001G21Rik
2.415	5.701	0.004622	Dock8
-0.8247	6.872	0.004622	Bmp4
-1.522	4.437	0.004872	Ndufs6
1.494	4.298	0.004872	Rps6ka1
1.8	4.853	0.004872	Cerk
2.647	3.591	0.005441	Hck
1.64	7.154	0.005441	Snx29
2.496	5.577	0.005441	Tns3
2.673	4.315	0.005565	Itga9
1.315	7.195	0.005565	Ptprj
1.168	6.414	0.00566	Pik3r1
3.977	2.68	0.00566	Abcc3
2.584	3.173	0.00566	Plxdc1
1.057	5.854	0.00566	Fbrsl1
2.435	3.535	0.00566	Gmip
-1.067	7.014	0.00566	Rps4x
1.571	4.269	0.005685	Stk10
2.194	4.91	0.005929	Adap2
1.307	5.335	0.005929	Ints6l
-1.145	13.29	0.005929	Lars2
2.751	3.016	0.005929	Gna15
2.692	4.38	0.005929	Cyth4
-1.074	7.849	0.005929	Igfbp6
1.422	5.156	0.005929	Slc7a8
2.81	3.435	0.005929	Psd2
1.994	3.86	0.005929	Fscn1
-1.027	6.697	0.00616	Tmem64
2.293	2.735	0.00616	Slc2a5
3.607	2.948	0.00616	P2ry6
4.086	3.076	0.00616	Rab6b
2.496	7.643	0.00616	Slc8a1
1.678	4.385	0.00616	Ehd4
-0.9085	8.523	0.00616	Thbd
1.346	8.086	0.00616	Tanc2
2.557	4.65	0.00616	Marchf1
1.062	5.639	0.00616	Tenm3
1.681	5.559	0.00616	Zdhhc14
1.721	5.746	0.00616	Ivns1abp
2.713	3.746	0.00616	Abcg1
1.29	5.555	0.00616	Cttnbp2nl
-1.062	4.799	0.00616	Rraga
-2.41	2.502	0.00616	Tceal5
2.233	4.034	0.00616	Adgrg1
1.024	7.185	0.00616	Hivep3
1.01	5.743	0.00616	Mapk14
1.909	4.56	0.00616	Ctsc
2.154	4.207	0.00616	Ptgs1
2.344	4.34	0.006281	Sorcs2
3.635	2.204	0.006281	Ugt1a6a
-1.485	4.14	0.006281	Sstr4
-0.8371	6.184	0.006372	Selenok
1.137	6.82	0.006405	Ankrd44
-1.156	6.167	0.006405	Foxc2
-1.17	6.091	0.006405	Smarca1
-1.242	4.476	0.006427	Nop10
1.788	4.505	0.006507	Otulinl
1.023	5.897	0.006507	Soga1
1.431	4.444	0.006507	Tpst2
-1.948	2.838	0.006507	Rny3
1.021	6.138	0.006532	Fnip2
-1.147	4.755	0.006532	Prdx3
-1.177	9.372	0.006532	Rfk
1.1	8.286	0.006532	Ldlrad4
-1.149	5.192	0.006532	Cyb5a
2.954	3.432	0.006532	Fgd2
2.134	3.971	0.006532	Pak1
1.191	5.296	0.006548	Myo5a
-0.8026	7.518	0.006548	Anxa5
2.695	4.145	0.006639	Cdh23
-0.776	7.538	0.006639	Serpinh1
3.383	3.329	0.00664	Arhgap45
3.468	2.024	0.006648	Coro2a
-0.8603	6.811	0.006859	Hacd4
1.604	6.889	0.00687	Mef2c
1.083	5.399	0.00687	Crlf3
2.704	5.182	0.00687	Fyb
-0.9973	6.553	0.00687	Gpx1
3.08	5.375	0.00687	Entpd1
1.294	7.804	0.00706	Zswim6
2.194	3.578	0.00706	Rgs2
1.118	8.566	0.007196	Ppm1h
1.1	8.451	0.007224	Tgfbr1
-0.8733	7.336	0.007224	Slc5a6
1.375	6.105	0.007224	Tbc1d22a
-1.593	5.743	0.007224	Dnajc5b
3.316	2.533	0.007224	Il21r
-0.9696	6.017	0.007224	Rpl9
3.953	2.985	0.007224	Pik3r5
1.389	4.391	0.007322	Tsga10
-0.9125	6.05	0.007322	Rcn1
0.8447	7.419	0.007322	Atp8a1
1.01	5.246	0.007322	Acsl4
-0.9973	6.306	0.007322	Fzd1
3.017	2.94	0.007322	Padi2
2.786	3.229	0.007322	Ednrb
-1.09	9.396	0.007343	Akap12
-0.9739	6.407	0.007442	Rgmb
1.968	5.505	0.007442	4933406I18Rik
-1.64	3.437	0.007442	Slc25a35
3.002	2.376	0.007485	Cd300a
-1.573	4.251	0.007485	Krt80
-1.508	5.071	0.007485	Wnk4
0.9927	4.871	0.007617	Rp2
0.8149	6.496	0.007652	Mvb12b
1.511	6.802	0.007714	Fli1
1.442	4.015	0.007719	Gbp9
3.284	6.217	0.007719	Csmd3
2.768	3.147	0.007719	Nlrp1b
-1.008	5.369	0.007719	Qsox1
2.326	4.075	0.007719	Il10ra
-0.8139	6.308	0.007719	Clic1
-0.9022	6.272	0.007719	Podxl2
-1.061	8.303	0.007719	Clu
2.806	4.199	0.007742	Lcp1
2.54	2.798	0.007812	Hcls1
2.91	3.037	0.007842	Myrip
1.99	4.763	0.007852	Paqr8
4.741	2.668	0.007873	8030442B05Rik
-1.063	5.975	0.007888	Kxd1
1.345	5.277	0.007888	Wsb1
-0.8365	5.615	0.007888	Cox7c
1.439	5.223	0.007888	Il6ra
2.744	2.517	0.007888	Cd300c2
2.632	4.703	0.007888	0610040J01Rik
-0.856	7.398	0.007888	Pdha1
2.796	3.141	0.007946	Slc7a7
0.8587	6.53	0.007946	Btaf1
-0.7978	6.738	0.00833	Paics
-0.8031	8.054	0.008391	Foxc1
3.146	2.98	0.008391	Ptpre
0.704	7.657	0.008569	Btbd9
0.9728	5.729	0.008569	Rufy3
-1.063	10.07	0.008569	Il31ra
1.407	3.706	0.008569	Zfp984
0.6603	7.206	0.008569	Map4k4
2.267	3.841	0.008569	Pik3cd
-1.742	7.217	0.008569	Nme2
1.133	6.83	0.008569	Ophn1
-0.9892	6.455	0.008569	Rpl8
2.308	3.655	0.008569	Sorcs1
2.203	3.317	0.008569	Fmnl1
-0.8873	6.363	0.008569	Ppia
2.703	2.203	0.008569	Csf2rb
1.922	5.832	0.008569	Trf
-0.7414	7.272	0.008569	Dnajc10
2.317	3.03	0.008569	Mlxipl
2.168	4.19	0.008569	P2ry13
1.779	4.3	0.008569	A830008E24Rik
-0.823	9.623	0.008569	Eef1a1
1.733	4.212	0.008698	Abcd2
0.9711	5.391	0.008706	4732471J01Rik
2.762	2.329	0.008805	Pik3r6
1.891	4.572	0.008875	Disc1
2.667	7.96	0.008875	Lrmda
-0.9032	5.668	0.008875	Dnajb11
-1.841	3.314	0.009024	Cbr3
-3.7	4.156	0.009024	Iqgap2
-1.077	4.659	0.009024	Elovl1
-0.8415	8.388	0.009024	Fbln1
1.127	4.506	0.009115	Garnl3
3.139	2.774	0.009127	Adcy8
1.139	8.718	0.009227	Qki
-0.7894	7.954	0.009358	Perp
-0.9785	6.542	0.009358	Serpinb6b
1.29	4.761	0.009358	Gm973
1.192	4.414	0.009358	Sipa1
-0.8958	7.976	0.009358	Scara3
2.565	5.272	0.009358	Vsir
-1.531	4.193	0.009358	Fam174b
0.8742	5.424	0.009375	Grk3
-0.9215	6.691	0.009435	Tmsb10
-1.165	4.586	0.009512	Cdc25b
-0.7341	6.107	0.009512	Smc4
2.768	4.42	0.009531	Gpr34
2.685	6.569	0.009531	Csf1r
0.8409	5.466	0.009531	Tmem243
1.212	4.7	0.009605	Vegfa
3.702	3.525	0.009605	Cd33
2.503	2.347	0.009605	Ighm
-0.7715	5.891	0.009605	Rpl7
1.003	7.051	0.009636	Numb
-0.8133	6.273	0.009636	Fibin
-0.7732	7.117	0.009636	Aldh2
-0.7828	7.743	0.009636	Chd3
1.45	4.227	0.009659	Lacc1
-0.6789	6.19	0.009678	Ccpg1
-1.11	4.585	0.009678	Tspo
1.99	4.615	0.009703	Ston2
1.061	4.944	0.009703	Mrps28
2.539	6.071	0.009703	Inpp4b
-0.688	7.486	0.009703	Clmp
-0.8525	5.883	0.009703	Gabarapl1
2.227	4.897	0.009713	Gsap
-0.7308	7.296	0.009713	Tnfrsf11b
1.174	5.505	0.009717	Dpysl2
2.455	6.718	0.009771	Cx3cr1
-1.059	6.771	0.009771	Sult1a1
2.89	5.463	0.009897	Erbb4
-0.899	6.807	0.0101	Rplp0
2.74	6.193	0.01028	Inpp5d
2.032	3.557	0.01028	Arrb2
1.679	5.637	0.01028	Spire1
-0.6319	8.569	0.01037	Emb
0.6579	6.466	0.01037	Dpy19l4
1.132	7.368	0.01037	Mast4
2.586	3.338	0.01037	Dock3
-1.123	5.752	0.01037	Rps15a
1.251	4.063	0.01042	Sh2b3
2.837	2.725	0.01042	Fermt3
1.632	3.646	0.01044	Prrg1
-1.436	3.414	0.01044	Gm54867
-0.8588	6.606	0.01051	Rpl10
-0.8374	8.025	0.01051	Sema3d
-1.195	4.434	0.01054	Entrep3
-2.681	2.923	0.01054	Fgfbp1
0.9415	6.68	0.01054	2210408I21Rik
0.9214	6.2	0.01054	Vav2
1.169	4.003	0.01054	Mthfd1l
0.9268	6.106	0.01054	Git2
-0.8768	5.483	0.01054	Npdc1
1.171	6.55	0.01061	Atp10d
2.462	6.504	0.01061	Sirpa
-1.426	5.942	0.01061	Tnfsf10
2.571	5.291	0.01061	Arhgap22
0.8685	5.821	0.01061	Tspan14
2.035	3.25	0.01067	Adcy7
-1.194	4.629	0.01067	L1td1
-1.026	5.367	0.01075	Wfdc1
-1.052	6.24	0.01077	Rps29
-0.8092	8.332	0.01077	Anxa2
-0.8696	6.121	0.01089	Mdh1
1.686	3.59	0.01094	Chst8
-0.7125	7.355	0.01106	Ak3
1.924	4.268	0.01106	Trim30a
-0.6884	6.965	0.01106	Rpl3
-0.814	7.406	0.01112	Klf5
1.06	4.451	0.01112	Prpsap2
1.122	4.228	0.01115	Pot1b
1.984	8.309	0.01115	Nav2
2.705	3.457	0.01115	Syk
1.957	2.514	0.01115	Evi2a
0.7219	6.062	0.01115	Per1
0.6038	7.318	0.01116	Acap2
-0.6977	8.88	0.0112	Ndrg1
1.542	5.258	0.01126	Mfhas1
2.234	5.478	0.01169	Lpcat2
1.505	3.857	0.01169	Meis1
2.717	2.769	0.01169	Cd37
-0.8705	5.718	0.01169	Calhm5
1.966	3.796	0.01169	Trim30d
1.038	6.545	0.01173	Klhl2
2.338	2.507	0.01179	Klhl32
-0.7891	5.491	0.01179	Mmut
-1.369	4.138	0.01179	Cnpy4
1.646	5.667	0.01179	Ank
0.7534	5.678	0.01179	Stk4
0.639	6.553	0.01181	Nrip1
-0.9235	5.528	0.01181	Rabac1
1.581	3.855	0.01181	Prcp
2.449	3.424	0.01181	Lmo2
-1.266	4.743	0.01193	Sec61b
-0.9136	5.204	0.01199	Pfdn5
1.055	5.557	0.01202	Tbc1d16
1.38	4.011	0.01209	Ralgps2
-2.319	3.51	0.01209	Angptl7
1.741	4.779	0.01209	Nuak1
2.439	5.255	0.01209	Cdh20
2.611	3.28	0.01209	Syngr1
-0.9294	5.702	0.01209	Xbp1
-0.7271	6.619	0.01209	Ramp2
0.6121	7.393	0.01209	Dip2b
-0.9652	5.841	0.01209	Gpx8
-2.26	3.816	0.01219	Gucy2c
2.022	3.379	0.01219	Ggta1
-0.8545	8.408	0.01219	Nbl1
-1.017	6.257	0.01219	Rps12
-1.057	5.398	0.01219	Atpif1
0.7067	6.084	0.01219	Sfswap
-0.6503	7.153	0.01219	Lamb2
-0.9931	5.117	0.01219	Emp2
2.588	3.253	0.01219	Rassf4
0.7997	7.353	0.01219	Fnbp1
-0.728	7.593	0.01219	Ston1
-1.098	6.237	0.01219	Cox8a
1.678	2.627	0.01219	Pde4a
-1.147	5.891	0.01219	Cd55
1.272	5.676	0.01219	Adamts9
0.9851	6.335	0.01219	Arhgap26 - ENSMUSG00000036452
2.049	5.881	0.01219	Sipa1l2
-1.494	8.263	0.01219	Islr
0.9667	7.834	0.01219	Ssh2
-0.9842	4.247	0.01219	Pnpla2
-0.7516	7.263	0.01219	Slc25a4
2.237	2.762	0.01219	Cadm4
-0.9236	6.097	0.01221	Rps21
0.6901	8.041	0.01221	Tmem135
-0.9739	5.692	0.01221	Ndufa4
0.9285	5.379	0.01229	E2f3
-0.8383	6.965	0.01231	Plekha6
0.8794	6.572	0.01231	Prickle2
-1.507	5.647	0.01232	Met
-0.8485	6.567	0.01236	Copb2
0.9658	4.832	0.01239	Samhd1
2.36	3.458	0.01239	Ncf2
-1.001	6.102	0.01241	Otud1
2.256	6.38	0.01245	Lyn
2.03	3.545	0.01245	Ntpcr
1.872	4.634	0.01245	Sema4d
2.452	2.644	0.01245	Gpr183
-1.051	7.665	0.01245	Rbp1
-0.6422	8.656	0.01245	Il6st
0.8597	5.11	0.01245	Aatf
-1.211	3.748	0.01245	Fam43a
0.8628	6.052	0.01245	Nrf1
2.965	3.92	0.01245	Lcp2
-1.068	6.222	0.01245	Nrp2
1.294	4.888	0.01245	Itpk1
2.936	3.183	0.01245	Pld4
2.306	3.262	0.01245	Ttyh2
-0.9814	5.397	0.01245	Rpl22l1
2.188	4.959	0.01245	Unc93b1
-0.8064	7.892	0.01246	Rpl4
0.8378	6.594	0.01248	Peli2
-0.9809	6.045	0.01248	Manf
-0.8688	5.904	0.01254	Ptges
-0.867	6.487	0.01254	Rps24
-1.169	4.144	0.01261	Gm49267
-0.6507	6.743	0.01262	Kank2
1.673	4.439	0.01273	Dtx4
1.639	4.843	0.01273	ENSMUSG00000095041
0.9015	8.803	0.01273	Srgap2
1.566	3.85	0.01273	Mafb
1.482	3.757	0.01273	Akna
1.154	7.244	0.01287	Hdac8
3.417	2.713	0.01302	Eva1a
2.708	4.365	0.01302	Rgs10
3.1	2.309	0.01306	Trpm2
-0.9938	4.754	0.01321	Chst12
-1.048	5.499	0.01321	Rps16
-0.7569	6.231	0.01321	Smpdl3a
-1.612	3.463	0.01321	Chrm5
-0.6628	7.516	0.01321	Skp1
-0.567	7.972	0.01321	Golgb1
-0.8023	5.991	0.01321	Atp5j
0.8489	5.961	0.01333	Abl2
2.15	4.53	0.01333	Basp1
-0.6382	8.868	0.01333	Mrc2
-0.8816	6.215	0.01333	Rpl22
1.476	4.705	0.01339	Rffl
1.435	4.024	0.01339	Me1
-0.6715	6.352	0.01339	Rpl5
-0.9662	6.033	0.01339	Rps17
1.885	4.48	0.01339	Phyhd1
0.7062	7.611	0.01339	Prkce
0.6673	8.09	0.01339	Apbb2
0.8631	5.852	0.01339	Myo9b
2.009	2.766	0.01339	Sall3
-0.8083	7.864	0.01347	Gjb2
1.753	4.175	0.01347	Slc16a7
1.072	8.172	0.01347	Prkn
-0.7573	6.424	0.01354	Uba1
1.543	2.801	0.01356	Ccdc61
0.7561	6.238	0.01356	Rab31
1.959	3.504	0.01356	Gprc5b
1.27	4.522	0.01356	Cdk6
-0.7973	7.998	0.01356	Plec
2.23	3.201	0.01361	Pdgfb
-1.081	6.234	0.01361	Adgrg6
-1.048	5.771	0.01362	Cox6a1
3.488	2.535	0.01362	Parvg
1.787	4.418	0.01362	Ephb1
-1.14	4.091	0.01362	Polr2g
2.33	4.368	0.01364	Acss1
-0.6357	6.647	0.01364	Rad21
1.1	8.549	0.01364	Tmcc3
-0.8319	10.45	0.01366	Ahnak
2.202	7.077	0.01366	Mertk
1.543	4.987	0.01366	Fam102b
1.474	5.343	0.01366	Plcg2
-0.9092	7.181	0.01372	Cavin2
1.06	6.913	0.0138	Lrch1
1.807	4.007	0.0138	Astn2
1.29	5.428	0.0138	Irak2
0.7497	7.274	0.01386	Fars2
0.8683	5.61	0.01386	Fbxw4
2.572	2.255	0.01401	Ptafr
2.929	3.597	0.01403	Gm5086
1.965	4.136	0.01413	Rpph1
-1.081	4.668	0.01413	Twist1
-1.025	4.381	0.01413	Tspyl4
2.335	3.001	0.01413	Cfap74
2.989	2.419	0.01423	Cfap299
-0.6813	7.095	0.01435	Sun2
-0.8942	6.984	0.01435	Itm2a
-0.9905	7.93	0.01441	Anpep
0.9453	5.325	0.01441	Plekha1
2.246	4.021	0.01441	Tnfrsf21
1.394	5.243	0.01441	Mapk4
-0.5919	7.022	0.01448	Acadsb
-0.9248	6.59	0.01449	Rps5
-0.9994	5.409	0.01449	BC031181
0.8241	6.336	0.01451	Iqsec2
1.07	7.056	0.01452	Cyrib
1.295	5.255	0.01452	St3gal5
-1.332	3.42	0.01452	Fbxw5
-0.8746	6.26	0.01452	Klhl13
4.079	2.403	0.01452	St8sia6
-1.157	4.551	0.01452	C77080
1.301	6.598	0.01467	Mitf
-0.9017	6.722	0.01469	Oat
1.207	3.655	0.01481	Slc36a1
-0.8987	6.47	0.01481	Tmem176b
1.509	9.003	0.01497	Plxdc2
-0.7806	8.736	0.01499	Calm1
-0.8844	6.036	0.01499	Lsr
-0.6273	8.155	0.01499	Cyfip2
2.09	4.747	0.01499	Tango6
1.097	5.853	0.01499	Kalrn
0.9431	6.352	0.01499	Arhgap17
0.6718	7.772	0.01499	Zcchc7
0.586	8.732	0.01499	Mef2a
-0.8815	4.603	0.01499	Rbbp9
2.553	4.542	0.015	Igsf11
1.959	6.855	0.01501	Pag1
1.22	4.117	0.01503	Tdp1
-0.9696	4.993	0.01512	Jmjd8
0.9447	4.61	0.01518	Grk2
2.798	4.376	0.01519	Ncam2
1.201	3.482	0.01521	Gm39469
-1.159	7.222	0.01521	Rplp1
-0.7837	7.083	0.01521	Tle5
0.7597	6.252	0.01521	Rab8b
4.13	2.701	0.01521	Gm40578
1.383	6.533	0.01521	Immp2l
-0.6155	7.067	0.01526	Arcn1
2.676	3.398	0.01531	P2rx7
-1.149	10.57	0.01532	Mgp
1.047	6.424	0.01532	Man1c1
0.8933	5.133	0.01533	4632427E13Rik
-0.8819	4.654	0.01541	Rpl15
-0.8311	7.564	0.01541	Arhgap29
0.575	6.449	0.01541	Taf15
-0.8142	4.908	0.01541	Glmp
2.093	3.415	0.01541	Phyhipl
0.8989	6.537	0.01541	Abr
0.7042	5.67	0.01543	Slc38a9
0.753	7.748	0.01544	Camta1
0.681	6.587	0.01549	Slc12a6
-0.8248	4.951	0.01549	Higd1a
-0.5608	7.032	0.01556	Atl3
-0.9956	4.94	0.01568	Dpp4
-1.281	4.383	0.01572	Spint2
1.092	5.488	0.01574	Rps6ka5
2.296	6.211	0.01574	Dock10
2.451	3.99	0.01574	Havcr2
0.8891	4.571	0.01574	Dclre1c
-0.5479	6.557	0.01574	Golm2
2.575	3.809	0.01574	Abi3
-0.5548	8.401	0.01586	Dync1h1
0.808	7.484	0.01591	Etv6
-0.6728	5.173	0.01591	Zadh2
-0.6627	9.062	0.01597	Rspo3
1.135	4.323	0.01597	Abcb1b
1.218	5.043	0.01597	Evl
-1.479	3.307	0.01598	Mrpl57
0.845	6.99	0.016	Lhfpl2
-1.078	5.747	0.01621	Tmem176a
2.631	3.841	0.01626	Trem2
-0.7225	7.652	0.01626	Cldn11
2.094	5.133	0.01626	Adcy2
0.8196	6.47	0.01626	Peli1
-0.909	4.757	0.01628	Tomm6
-1.193	7.405	0.01628	Arhgdib
1.502	6.041	0.01659	Limch1
2.399	2.735	0.01659	Aif1
-0.7139	7.18	0.01659	Ltbp4
1.771	6.527	0.01659	Lgmn
2.333	3.898	0.01659	Capn3
0.9215	4.472	0.01665	Stk17b
-0.777	5.79	0.01665	Cers2
-1.055	3.773	0.01665	Acyp1
0.694	8.48	0.01673	Fhit
-1.324	4.087	0.01699	Ndufb8
-1.001	5.466	0.01704	Tmem18
2.135	3.064	0.01717	Abi3bp
-1.372	3.283	0.01717	Lsm4
-0.9311	5.771	0.01724	Gstm2
2.563	5.754	0.0173	Prex1
0.8364	8.769	0.01741	Maml2
1.103	4.035	0.01741	Hhat
0.7857	6.172	0.01741	A330023F24Rik
-0.6475	9.146	0.01741	Ptp4a2
-0.5244	7.368	0.01741	Arpc2
0.9065	6.744	0.01741	Agmo
2.471	6.372	0.01741	Runx1
0.7219	6.808	0.01741	Lrch3
0.8235	5.481	0.01741	Gm38666
-1.202	3.615	0.01741	Coa3
-1.119	6.508	0.01741	S100a1
-0.848	6.714	0.01741	Rpl17
3.225	5.804	0.01741	Dock2
-0.9471	4.913	0.0175	Tprgl
-0.7641	5.958	0.01752	Mxra8
-1.462	3.019	0.01752	Mrpl36
-0.7752	6.969	0.01752	Dstn
-1.89	3.369	0.01752	A730020M07Rik
1.464	6.01	0.01752	Zfp710
-0.8848	5.119	0.01752	Plin3
1.747	4.146	0.01755	Stambpl1
1.222	4.498	0.01755	Rnd3
-0.6261	6.176	0.01757	Dzip1
-1.389	3.828	0.01767	Imp3
1.942	3.957	0.01772	Syn2
-0.7618	5.222	0.01773	Ndufa13
0.8322	4.522	0.01775	Rap2a
0.8217	5.031	0.01775	Nfatc1
1.673	2.858	0.01778	Cebpa
-0.8551	5.982	0.01778	Tspan8
3.171	3.948	0.01778	Dab1
-1.084	3.815	0.01778	Mospd1
1.154	5.157	0.01778	Gramd1b
-1.018	7.284	0.01785	Mpzl2
1.023	4.473	0.01789	Src
1.617	7.037	0.01789	Plxna4
2.181	3.534	0.01789	Itih3
1.024	4.668	0.01794	Dapp1
-0.7962	6.376	0.01796	Rpl32
2.87	3.648	0.01796	2610203C22Rik
0.9299	5.898	0.01796	Rcsd1
-0.6906	6.642	0.01796	Shc1
0.8455	5.404	0.01796	Vrk2
-0.7743	6.033	0.01796	Ganab
1.038	5.713	0.01798	Galnt7
2.19	3.708	0.01813	Ccr5
1.582	5.602	0.01819	Adgrl4
-0.8626	5.883	0.01819	Rps6
1.229	4.621	0.01821	Pald1
-0.9698	4.23	0.01836	Gatd3a
-1.001	6.082	0.01836	Rps15
-0.9218	4.802	0.01836	Psmb4
0.6803	6.021	0.01836	Ranbp9
2.635	2.772	0.01847	Lgi1
-1.03	5.013	0.01849	Nme1
-0.8967	5.273	0.01857	Uqcrb
0.5844	7.307	0.01857	Pmepa1
1.762	6.057	0.01857	Tmtc2
1.339	4.415	0.01859	Nek6
-0.7246	5.165	0.01859	Cnpy2
0.8453	4.284	0.01864	Wdr25
1.151	6.546	0.01875	Mgat5
0.9831	5.77	0.01881	S1pr1
2.348	2.815	0.01881	B3galt5
1.768	3.265	0.01881	Zfp951
0.9201	5.975	0.01881	Aig1
-0.889	6.969	0.01885	Rpl13
-0.6319	8.357	0.01885	Rhoa
-0.5608	6.324	0.01885	Pcdhgc3
2.602	2.687	0.01885	Plekha7
-0.9817	5.316	0.01885	Rpl18
1.392	4.32	0.01885	Hps4
-1.192	5.186	0.01886	Dsg2
0.6731	6.236	0.01886	Msrb3
-0.8679	5.598	0.01894	Ap2m1
-0.6318	7.276	0.01897	Srpr
0.7723	5.912	0.01897	Mrtfb
-1.192	3.398	0.01897	Cfap298
2.472	2.209	0.01897	Kcnk1
2.488	3.18	0.01899	Spi1
1.61	2.909	0.019	1700017B05Rik
1.111	3.506	0.019	2700097O09Rik
2.28	4.18	0.019	Arhgap25
1.22	4.498	0.01916	Sft2d1
-0.8672	6.458	0.01916	Rpl26
2.687	5.297	0.01916	Itga6
-0.748	7.41	0.01916	Aldoa - ENSMUSG00000030695
-0.749	6.062	0.01916	Fzd2
2.577	2.213	0.01916	Myo18b
-0.5857	7.094	0.01918	Selenof
0.8922	4.848	0.01918	Pip5k1c
0.8018	6.484	0.01918	Gna12
-0.7954	6.97	0.01922	Rpl21
-0.9921	4.788	0.0193	Ssr2
-1.076	4.518	0.01934	Htr1b
-0.7067	7.87	0.01934	Ckb
2.891	4.711	0.01934	Rasgrp3
1.844	4.457	0.01934	Sall1
-0.86	5.643	0.01942	Ssrp1
1.135	6.444	0.01943	Skap2
2.05	3.285	0.01943	Plekho1
-0.5401	7.332	0.01943	Caprin1
-1.154	3.32	0.01943	Pafah2
-0.9066	5.282	0.01949	Fap
2.015	3.899	0.01954	Tnfrsf11a
-0.5738	6.71	0.01954	Mtch1
-0.9012	6.364	0.01954	Rpl31
0.7411	5.727	0.01954	Mlxip
-0.7982	5.363	0.01954	Hgsnat
0.6905	7.057	0.01967	Rai1
-1.033	6.149	0.0198	Tagln2
-0.7252	6.582	0.01994	Egflam
-1.272	3.398	0.01994	Nt5c1a
-0.6366	6.172	0.01994	Pdia4
1.744	2.977	0.02011	Gal3st4
1.379	4.658	0.0202	Sdc3
2.458	3.658	0.02021	Bin2
0.9825	6.433	0.02024	Lrrk1
-0.855	5.721	0.02024	Tspan31
1.019	6.269	0.0203	Atp1b2
1.368	4.092	0.0203	Apobec3
1.18	4.653	0.02036	Ppcdc
-0.7914	4.548	0.02046	B4gat1
-1.952	3.588	0.02046	4933431K23Rik
1.718	5.893	0.02046	Cacnb2
-0.9724	4.596	0.02052	Chpf
-0.8517	6.194	0.02052	Ankrd50
1.651	2.845	0.02073	Slc46a3
1.147	3.931	0.02076	Fignl2
-0.7424	6.324	0.02079	Mgat3
-1.403	4.436	0.02079	Wnt9a
0.7592	5.275	0.02082	Sat1
-0.568	7.226	0.02107	Foxd1
-0.6538	7.067	0.02109	Gdpd5
-0.7913	5.579	0.02112	Cnih1
-0.9516	5.766	0.02112	Tubb4b
-0.6606	6.163	0.02112	Ccng1
-1.132	4.72	0.02114	Ndufa2
-0.9813	5.924	0.02114	Pcdh11x
-0.7232	6.081	0.02117	Arf2
0.5582	6.547	0.02118	Atp2c1
-0.8319	5.013	0.02118	Tm2d2
3.017	2.308	0.0212	Tlr13
0.6927	6.102	0.02121	Pkig
-0.8799	6.427	0.02122	Nt5e
1.271	4.941	0.02124	Ptk2b
-0.5896	9.066	0.02126	Hsp90b1
-0.9664	5.795	0.02131	Flrt1
0.73	4.988	0.02133	Pepd
2.821	5.561	0.02136	Ikzf1
0.6231	7.481	0.02136	Aopep
2.225	3.318	0.02146	Fcer1g
2.53	5.156	0.02149	Selplg
-0.9304	6.227	0.02149	Rps27a
2.32	2.167	0.02149	Susd3
2.622	5.115	0.02149	Ptprc
-0.9733	4.22	0.02151	Mrpl52
0.9616	3.83	0.02166	Rrp1b
-0.8587	6.676	0.02168	Myl12a
-1.238	3.635	0.02177	Mtln
-0.8825	6.405	0.02177	Kank4
0.9657	6.508	0.02178	Thsd7a
-1.172	4.518	0.02178	Tsku
-0.6675	6.985	0.02179	Spcs2
1.076	4.686	0.02179	Nckap5l
2.922	5.513	0.02182	Laptm5
2.443	2.737	0.02182	Arap3
1.357	4.294	0.02182	Tmem104
-1.048	4.37	0.02182	Steap2
-0.8831	4.386	0.02182	Cops9
-0.7026	5.552	0.02182	Eef1b2
-0.8295	4.687	0.02182	Yipf3
1.019	5.078	0.02184	Tafa5
-0.8261	5.196	0.02192	Cavin3
-0.6128	6.268	0.02195	Gnl3l
0.9457	4.497	0.02195	Gpld1
-0.9582	6.153	0.02198	Enpp1
-0.9209	5.007	0.02204	Ndufa6
-0.5391	10.37	0.02204	Sptbn1
0.8713	4.719	0.02204	Eef2k
0.6198	6.619	0.02204	Rnf169
1.991	3.431	0.02204	Mcf2l
1.001	4.624	0.02204	Rab11fip5
0.8462	5.652	0.02209	Pkn1
0.7224	6.51	0.02214	Cdk19
2.424	2.474	0.02214	Arhgap4
0.9885	5.814	0.02214	Stard9
-0.8081	7.269	0.02214	Rps8
0.6504	6.427	0.02225	Gclc
-0.559	8.256	0.02229	Dnajc3
1.129	5.037	0.0223	Spata13
0.7163	6.013	0.02232	Alpk1
-0.583	8.105	0.02237	Ctnnb1
3.891	3.418	0.02237	Wdfy4
-2.736	2.909	0.02241	Pianp
-0.7922	6.383	0.02241	Rps27
-0.889	4.397	0.02241	Pdp1
-0.5842	6.937	0.02241	Ybx3
1.868	3.44	0.02247	Tent5c
1.042	3.745	0.02247	Mast3
1.298	4.484	0.02247	Ppfibp2
-0.7268	6.318	0.02252	Ctr9
-0.5408	6.568	0.02254	Ipo7
0.9345	3.852	0.02263	Nid2
-0.7032	6.709	0.02275	Eif5a
-0.8772	5.788	0.02275	Rps20
0.6781	8.682	0.02275	Pid1
1.042	4.176	0.02275	Scamp5
-0.5675	7.911	0.02275	Pde5a
-1.027	5.126	0.0228	Uqcr11
-1.053	5.426	0.0228	Rpl38
2.948	4.721	0.02281	Tbxas1
-1.003	3.763	0.02281	Arpin
2.971	5.043	0.02283	Hpgds
0.5494	5.976	0.02289	Nacc2
-0.6457	6.472	0.02289	Pdia6
-0.9064	4.409	0.02289	Cd59a
0.8292	7.453	0.02289	Asap1
-0.7673	5.974	0.02289	Car14
-1.42	2.73	0.02289	D430036J16Rik
0.729	6.426	0.02289	Anks1
2.484	5.451	0.02311	Cables1
-0.9604	4.442	0.02314	Gm17035
2.02	3.91	0.02314	Kif21b
0.4895	8.961	0.02315	Epb41l2
0.6412	6.823	0.02315	Adcy9
1.041	3.326	0.02328	Trub1
-1.265	3.504	0.02328	Timm13
0.7716	6.898	0.02329	Parp8
1.978	3.7	0.02338	Nfatc2
-0.7174	7.001	0.02347	Slc35g1
1.949	2.556	0.02351	Or2v1
0.7655	5.361	0.02351	Tgs1
-1.21	4.504	0.02351	Ndufb11
-0.784	6.503	0.02351	Rpl37a
-0.6719	6.462	0.02351	Glrb
-1.241	3.99	0.02361	Timm8b
-1.063	4.414	0.02374	Cisd1
1.845	4.169	0.024	Kcnj10
-0.8145	5.117	0.024	Dhrs7
0.7988	5.327	0.024	Elmo2
2.861	5.219	0.024	Fat3
0.6897	5.517	0.02403	Rps6kc1
-1.136	3.831	0.02403	Gstp1
2.372	2.467	0.02406	Evi2
-0.6264	6.664	0.02411	Sec61a1
0.605	8.374	0.02412	Smyd3
-0.6948	5.661	0.02412	Sptssa
-0.5432	7.907	0.02413	Ndfip1
-1.377	3.372	0.02413	Naa38
2.087	5.054	0.02431	E230029C05Rik
-0.8835	5.668	0.02436	Tuba1a
1.112	4.856	0.02444	A930015D03Rik
0.8682	6.667	0.02444	Tasp1
1.461	4.769	0.02444	Ralgps1
0.5444	8.243	0.02444	Sik3
-0.7038	6.75	0.02448	Rps3
1.488	4.277	0.02448	H2-Q4
1.299	3.998	0.0245	Nova1
2.681	5.003	0.0245	C1qc
2.286	3.326	0.0245	Slc40a1
1.166	4.583	0.0245	Wasf3
1.727	2.889	0.0245	Aatk
0.8461	7.936	0.0245	Pals2
0.4714	6.956	0.0245	Cnot4
-1.085	5.466	0.02454	Rpl35
-0.8462	5.387	0.02454	Rpl35a
-1.012	8.487	0.02454	Hspa5
-0.5201	11.25	0.02454	Slc38a2
2.307	6.499	0.02458	Slc9a9
-1.692	3.511	0.02458	Stmn1
2.119	3.077	0.02461	Fcgr2b
-1.101	4.761	0.02461	Hmgb2
-0.6224	8.409	0.02461	Laptm4a
-0.6633	7.35	0.02461	Capn2
0.9092	6.358	0.02465	Gtdc1
-0.8268	4.317	0.0247	Zfp651
-0.5025	8.055	0.0247	Lamp1
2.476	2.516	0.02476	Tox2
-0.8147	4.643	0.02478	Mydgf
0.9747	7.431	0.02478	Hdac4
1.16	3.993	0.02478	Zcwpw2
0.7097	7.102	0.02478	Rap1gds1
-0.6132	7.987	0.0248	Gsn
3.88	4.745	0.02488	Ppp2r2b
-0.7935	6.387	0.02491	Gabarap
-0.5692	8.778	0.02494	Tsc22d1
-0.5392	5.917	0.02494	Myo1c
-0.8513	4.897	0.02495	Gpc1
-0.6715	6.508	0.02495	Lmna
-0.6961	9.335	0.02495	Col1a2
0.7406	4.87	0.02505	Tmem241
1.667	2.641	0.02512	BC065397
-0.7588	5.38	0.0252	Ndufv3
1.184	7.199	0.0252	Magi1
-0.5532	8.762	0.0252	Tmsb4x
0.5849	7.607	0.02523	Itgb5
-0.6172	5.881	0.02523	Stip1
0.7169	7.019	0.02525	Itpkb
-0.9273	4.91	0.02525	Txndc17
1.405	4.301	0.02528	Spsb1
-0.5324	7.147	0.02534	Atp5a1
-0.8545	4.549	0.02537	Eif3i
-0.704	6.906	0.02537	Arpc1b
0.9358	5.504	0.02537	Zup1
-0.8603	4.574	0.02537	Ech1
0.6577	5.614	0.02537	Dtnbp1
-0.7681	5.207	0.02537	Atp6v1f
-0.9235	4.049	0.02537	Naxe
-1.001	4.399	0.02537	Psmb3
0.7127	6.621	0.02538	Tra2a
1.255	2.985	0.02538	Gm49356
0.4982	6.882	0.02544	Fnip1
-1.092	3.347	0.02545	Phlda3
-1.194	5.041	0.02554	Ubl5
-0.7262	5.1	0.0256	Tmem51
-0.9451	4.098	0.02563	Jpt2
0.5391	9.097	0.02564	Magi2
-0.8437	3.933	0.02564	Orai3
-0.6551	8.156	0.02564	Tgoln1
-0.4978	8.348	0.02564	Calr
1.031	3.667	0.02564	Gm14326
1.555	4.803	0.02564	Galnt18
-0.4458	8.631	0.02564	Sptan1
-0.6463	6.43	0.02567	Cd151
0.7075	6.866	0.02567	Sik2
-0.7542	6.151	0.02576	Rack1
2.005	3.424	0.02586	Usp35
-1.231	5.509	0.02587	Id1
1.084	4.314	0.0259	Clip2
-0.8741	4.097	0.02598	Bcat2
-0.9193	4.016	0.02598	Ccdc9b
-1.349	9.929	0.026	Ptgds
-0.6157	5.332	0.026	Decr1
2.119	5.755	0.02601	Ntrk2
-0.5107	8.433	0.0261	Tax1bp1
-0.868	4.51	0.02617	Cdc42ep5
1.675	3.232	0.02619	ENSMUSG00000120002
-1.588	6.769	0.02619	Ednra
0.8202	4.864	0.0262	Zcchc2
0.7127	5.073	0.02628	Casp8
-0.7139	4.686	0.02631	Srprb
-1.172	3.805	0.02631	Gm20536
-0.9949	4.681	0.02631	Etfb
0.5048	7.925	0.02631	Ppp3ca
0.7728	4.69	0.02631	Platr25
-0.6766	7.104	0.02631	Slc9b2
-1.061	3.503	0.02631	Pfdn6
2.485	3.308	0.02631	Fcgr3
0.5708	9.164	0.02631	Foxn3
-0.7844	5.128	0.02631	Spcs1
1.074	5.375	0.02631	Mgll
-1.16	3.753	0.02631	Mmp15
-0.8718	5.414	0.02631	Serpinf1
-0.7484	4.849	0.02631	Nqo2
0.9777	4.871	0.02631	Ubtd1
0.9471	4.239	0.02631	Junos
-0.886	6.231	0.02631	Rpl19
2.576	3.873	0.02637	Cd53
1.088	3.353	0.02638	Primpol
-1.196	2.865	0.02646	Nudt16
0.9916	3.925	0.02648	Trit1
1.559	3.072	0.02659	ENSMUSG00000121069
0.6162	6.63	0.02681	St3gal6
2.577	2.901	0.02681	Csmd2
-0.9958	6.124	0.02681	Bmp7
0.8306	8.004	0.02689	Zeb1
-0.704	5.895	0.02697	Slc39a1
-0.6443	4.817	0.02697	Txn2
-0.731	5.319	0.027	Nynrin
0.5444	7.909	0.027	Hivep2
-0.9824	5.416	0.02703	Rpl36
0.7269	7.261	0.02706	Akt3
-1.294	3.223	0.02706	2810433D01Rik
0.7888	5.679	0.02707	Cds1
-0.7006	6.267	0.02709	Dynlt3
1.899	4.157	0.02719	Pfkfb3
-0.7364	5.811	0.02719	Clptm1l
1.253	4.543	0.02723	Adamts6
-0.6262	6.922	0.02723	Akr1a1
0.9707	4.286	0.02728	Gatb
2.596	4.364	0.02749	Esrrg
2.719	3.993	0.02749	Kcnk13
-0.8071	5.026	0.02749	Cops6
-1.363	3.935	0.02749	Ptgr1
-0.6576	9.153	0.02749	Col12a1
3.565	5.013	0.02749	Gria1
-0.9195	4.231	0.02749	Ndufa1
-1.232	4.141	0.02761	Aurkaip1
0.5517	5.962	0.02778	Map2k1
-0.5886	9.166	0.02781	Efemp1
-0.567	17.42	0.02789	Rn18s-rs5
-0.8962	3.778	0.02789	H1f4
2.603	5.015	0.02796	Itgam
1.766	2.916	0.028	Mlc1
-0.6258	5.228	0.02804	Snapin
-0.5405	6.868	0.02804	Tpcn1
-0.5402	7.37	0.02804	Cdh5
-0.6823	7.998	0.02804	Uaca
1.347	8.456	0.02806	Plcl1
0.5676	6.922	0.0281	Nsmce2
-0.7809	5.988	0.02819	Txndc5
2.626	4.374	0.02826	Blnk
0.7991	4.189	0.02837	Slc35b3
0.6221	5.687	0.02858	Tpp2
-0.7352	6.667	0.02858	Rpl18a
-0.6402	7.355	0.02867	Myl6
1.858	3.067	0.02868	Elovl7
-0.8405	9.163	0.02875	Fth1
2.776	4.253	0.02878	Fut9
-0.5684	5.909	0.02882	Hk1
-0.8258	6.324	0.02882	Rpl23a
0.8303	6.541	0.02887	Ly6e
0.7822	5.156	0.0289	Chsy1
0.8038	5.363	0.02898	Ccdc93
-0.7181	5.741	0.02901	Cd302
-0.5888	6.153	0.02901	Chmp5
1.296	5.172	0.02903	Map2
0.9146	5.261	0.0291	Pakap - ENSMUSG00000038729
-0.5953	8.435	0.02913	Pgrmc1
-0.8724	4.055	0.02916	Wbp1
1.25	3.788	0.02918	Arhgap28
0.8858	6.622	0.02918	Rapgef5
0.7259	4.566	0.02919	Btg1
-0.7742	4.871	0.0292	Selenon
1.115	4.94	0.02928	Slc29a3
-1.136	3.604	0.0296	Tmed1
-0.5014	6.948	0.02961	Bltp2
0.8854	4.588	0.02962	Usp36
0.6776	4.571	0.02965	Bcl2l11
-0.882	4.753	0.02965	Cyp2s1
-0.5123	6.614	0.02965	Tcaf1
0.691	6.685	0.02965	Pde8a
0.5389	5.856	0.02965	Chka
-1.022	5.49	0.02965	S100a11
-0.8387	4.991	0.02965	Cox7a2
-0.8549	4.882	0.02973	Hcar1
1.903	4.581	0.02973	Col27a1
-0.6374	6.402	0.02973	Cox4i1
1.933	5.673	0.02973	Cacna1d
-0.6778	6.542	0.02973	Arl3
0.6407	8.674	0.02976	Zfhx3
1.46	6.067	0.02976	Serpine2
1.276	3.34	0.02977	Dclk2
-0.88	5.096	0.02978	Smdt1
2.364	3.544	0.02979	Rftn1
-0.9075	5.882	0.0298	Ptpru
1.913	2.644	0.0298	Lrrc3
-0.7711	5.142	0.0298	Nenf
-0.9361	3.949	0.02987	Gm11944
0.9708	6.662	0.02987	Atxn7l1
-0.5518	6.274	0.02989	Itga10
-0.5654	6.906	0.02998	Twsg1
1.922	3.117	0.03	Ccnb1ip1
1.489	3.222	0.03005	Uba7
-0.9052	9.301	0.03005	Apod
1.244	4.555	0.03008	Cyria
-0.7487	5.469	0.03011	Wnt16
-0.952	4.031	0.03011	ENSMUSG00000121477
-0.6612	6.503	0.03011	Map1lc3b
-1.143	3.507	0.03022	4930511M06Rik
2.23	3.126	0.03022	Itga8
-0.6361	5.884	0.03023	Psmb1
0.7021	4.96	0.03023	Cttnbp2
1.874	3.736	0.03042	Parvb
0.6645	4.695	0.03042	Mgmt
0.817	5.846	0.03042	Rcbtb2
1.28	4.327	0.03042	Pacrg
0.8377	6.665	0.03042	Smap2
-0.6613	5.178	0.03042	Sh3glb2
1.634	5.776	0.03042	Arhgap24
-0.6488	10.04	0.03058	Slc26a7
-1.072	4.004	0.03059	Habp4
1.463	5.148	0.03075	Abtb2
-1.008	3.988	0.03082	Banf1
0.6953	5.018	0.03082	Sgce
0.7689	5.684	0.03082	Ppard
-0.4592	6.714	0.03084	Sacm1l
2.086	3.577	0.03084	Anapc15
-1.12	4.24	0.03084	H2az1
-0.6112	7.475	0.03084	Atp5b
0.7107	4.709	0.03084	Cep192
1.057	5.25	0.03084	Fmnl3
-0.6944	5.574	0.03088	Prdx2
-0.8637	5.073	0.03094	Nedd8
-0.9047	6.35	0.03098	Rpl37
-1.53	3.554	0.031	Prkar2b
0.6038	5.214	0.03102	Polk
0.7138	4.843	0.03102	Vac14
-0.6215	5.496	0.03102	Tmed4
2.57	4.45	0.03102	Srgap1
2.055	3.787	0.03107	Adgrb1
0.6731	6.085	0.03107	Il1rap
0.5532	6.454	0.0311	Arhgap12
3.039	2.261	0.03117	ENSMUSG00000120942
0.513	6.435	0.03119	Bcl2
1.689	8.302	0.03119	Dock4
-0.9783	4.34	0.03119	2210016F16Rik
3.05	2.598	0.03119	Apobec1
-0.6847	5.31	0.03119	Fam149a
-0.5478	7.129	0.03119	Tmem59
-0.8391	6.609	0.03119	Ramp1
1.378	3.899	0.03119	Ptpn6
1.411	3.533	0.03119	Pcdh10
0.9114	4.217	0.03119	Tpcn2
-0.6811	5.429	0.03119	Slc39a7
-0.5869	5.303	0.03126	Degs1
-0.6462	5.472	0.03136	Itgb4
-1.272	5.705	0.03136	Prune2
0.6665	5.406	0.03136	Msantd2
0.7145	4.999	0.03145	Gusb
-1.088	3.684	0.03145	Chchd1
0.8465	5.542	0.03145	Galnt10
1.007	5.606	0.03145	Tec
0.6722	5.587	0.03147	Ftx
1.315	2.973	0.03148	Amz1
2.624	5.121	0.03155	Siglech
1.826	2.818	0.03158	Fes
0.45	7.013	0.03164	Rbm5
1.163	4.297	0.03174	Bhlhe41
2.006	4.469	0.03177	Gm10790
-1.867	3.103	0.03181	Rnf125
0.7835	6.427	0.03189	Rapgef1
1.215	4.033	0.03203	Gm26542
-0.6674	5.248	0.03203	Nudc
2.242	5.047	0.03203	Mecom
-0.6963	6.006	0.03203	Rnf145
0.618	5.479	0.03203	Naa16
1.668	3.651	0.03223	3110082I17Rik
-1.163	3.154	0.03223	Tmem160
0.5012	6.718	0.03229	Dnm2
0.724	6.442	0.03229	Gng12
0.6728	6.076	0.0323	Mylip
1.371	4.012	0.0323	Notch1
-1.111	4.345	0.03236	Tmem256
-0.6757	5.905	0.03241	Cct6a
0.5981	8.147	0.03241	Igf1r
0.5798	6.11	0.03244	Mef2d
-1.123	4.063	0.03244	Hsd17b10
-0.5045	7.838	0.03244	Tmod3
-0.5008	8.462	0.03254	Abcg2
-0.7609	6.494	0.03254	Scpep1
0.7683	5.104	0.0326	B4galt5
-0.519	9.191	0.03262	Abcb1a
0.9145	4.428	0.03262	Cpped1
1.263	3.985	0.03262	Mettl15
-0.4624	7.69	0.03262	Rdx
2.579	5.419	0.03262	C1qb
1.002	3.982	0.03262	Ccdc138
0.8414	5.366	0.03264	Dgkz
-0.7921	5.362	0.03264	Rpl39
-0.8134	4.628	0.03266	Fut11
-0.819	4.029	0.03269	Rai2
1.439	3.364	0.03269	Ddx31
-0.8149	5.41	0.03269	Vat1
0.7008	5.377	0.03287	Bach1
-0.4494	8.072	0.03297	Tpr
0.9356	5.363	0.03306	Dgkd
0.5265	6.373	0.03306	Vgll4
0.4335	8.505	0.03306	Son
-1.289	4.256	0.03306	Micos13
1.382	3.027	0.03324	Susd4
0.5327	6.908	0.03333	Eml4
-0.706	6.638	0.03343	Id3
2.482	2.548	0.03343	Gm44860
1.676	3.179	0.03343	Dubr
0.8571	4.142	0.03344	Gm20559
0.8994	4.412	0.03344	Ppp1r12c
-0.6472	6.6	0.03344	S100a10
0.8942	4.586	0.03344	4833420G17Rik
0.8818	7.985	0.03346	Ptprm
-0.4375	10.22	0.03346	Nedd4
0.5673	6.658	0.03346	Hipk2
-0.6015	6.329	0.03346	Adipor1
-0.4729	7.947	0.03346	Grk5
0.645	8.02	0.03346	Cmip
-1.101	4.939	0.03366	Uqcrq
-0.5848	5.768	0.0337	Gm21988
-0.6135	11.86	0.0337	Gphn
-1.045	3.698	0.0337	Mettl26
-0.9248	3.47	0.0337	Nt5c
0.6528	8.415	0.0337	Maml3
-0.6551	5.024	0.03373	Bahcc1
-0.8843	5.088	0.03373	Slc25a24
0.9311	4.402	0.03373	Sp140
-0.6492	5.851	0.03373	Cct2
-0.5014	7.179	0.03373	Atp1b3
0.6335	4.844	0.03373	Ptcd3
-0.6751	10.43	0.03379	Ccn3
-0.616	7.538	0.03385	Rbbp7
2.893	3.28	0.03389	Tyrobp
-0.684	4.821	0.034	Nbn
0.989	3.564	0.034	Rab3ip
0.6211	6.404	0.034	Hs2st1
-0.5474	5.542	0.034	Dnajb9
0.9805	3.622	0.034	Copz2
-0.6794	4.628	0.034	Inppl1
-0.4256	6.953	0.034	Arhgdia
0.7377	5.502	0.034	Tmem260
-0.5096	7.174	0.034	Stom
1.252	7.71	0.034	Zeb2
2.722	3.027	0.034	Pik3cg
2.814	4.392	0.03402	Csf3r
-0.639	5.757	0.03402	Tuba1b
2.634	3.445	0.03403	Ptpro
-0.9951	6.807	0.03403	Rps23
-0.9723	4.316	0.03415	Ndufs8
-0.832	4.467	0.03415	Emc4
-0.7716	6.358	0.03424	Atp5pb
0.4632	6.505	0.03427	Luc7l3
1.102	5.871	0.03432	Myo1e
0.749	4.7	0.03432	Rab40c
-1.145	3.841	0.03434	Bola3
1.857	4.506	0.03449	Grik2
-0.958	3.801	0.03466	Pnpo
-0.6368	6.643	0.03466	Rab18
-0.5145	8.218	0.03466	Atp1a1
-0.6122	7.003	0.03466	Capns1
0.59	5.55	0.0348	Tent2
-0.6387	5.379	0.0349	Spcs3
-0.761	4.399	0.03509	Clpp
1.733	3.11	0.03509	C4b
-0.4905	8.266	0.03509	Bmp5
1.02	3.647	0.03514	Tifa
-0.9406	4.2	0.0352	Txnl4a
2.033	2.705	0.03531	Arl4c
2.293	4.318	0.03531	Nckap1l
-0.9335	3.494	0.03541	Rfesd
0.9756	4.261	0.03543	Gk
-1.626	2.87	0.03546	Rnf113a2
1.687	6.638	0.03549	Pde3b
0.5688	5.659	0.03554	Tbk1
-1.011	4.498	0.03557	Zfp729a
0.8137	4.24	0.03579	Gtpbp2
0.8646	4.168	0.03579	0610043K17Rik
0.4969	6.766	0.0359	Rbm26
1.809	4.633	0.03591	Mboat2
-1.059	3.859	0.03591	Praf2
1.52	3.414	0.03591	Pecam1
-0.5085	6.248	0.03591	Clip4
0.6734	5.522	0.03591	Tmem170b
0.5881	5.807	0.03593	Rasgef1b
0.6405	5.325	0.03593	Nudt3
1.239	3.312	0.0362	Gm28403
-0.6999	4.994	0.03627	Hspa12b
-0.7296	8.697	0.03627	Itm2c
-0.5743	5.445	0.03637	Hsbp1
0.68	5.282	0.03637	Coro7
0.6435	6.458	0.03641	Map4k3
-0.8913	4.089	0.03644	Krtcap2
2.786	3.709	0.03644	Vav1
0.7588	7.573	0.03644	Rreb1
0.695	4.79	0.03644	Gigyf1
1.428	4.011	0.03644	Smox
0.5856	6.731	0.03644	Rasal2
1.127	5.296	0.03644	Cdyl
0.6768	5.454	0.03649	Cntrl
-0.981	3.302	0.03649	Morc4
-0.6105	5.772	0.03652	Twf1
1.142	4.881	0.03655	Gm4258
-0.6945	7.052	0.03656	Ehd3
-0.675	6.997	0.03685	Pls3
3.548	3.776	0.03685	Cd84
-0.4429	7.937	0.03685	Ctnna1
1.502	5.612	0.03685	Pvt1
0.5232	7.257	0.03685	Tmcc1
0.7061	6.76	0.03685	Agap1
-0.5563	6.544	0.03685	Hsd17b11
-0.6553	5.949	0.03685	Kdelr1
1.174	6.522	0.03695	Plcl2
-0.823	7.263	0.03696	Rpl41
2.393	3.326	0.037	Gm29266
0.6377	6.362	0.037	Pign
1.37	4.306	0.03703	Mapt
0.6109	6.963	0.0372	Cdkal1
1.008	3.171	0.03732	Nbeal2
-0.533	6.092	0.03734	Flii
-0.6195	5.722	0.03747	Irf2bpl
0.5179	8.944	0.03759	Mbnl2
-1.128	6.394	0.03759	Crabp2
-1.264	3.039	0.03762	Qprt
-0.8441	4.219	0.03762	Pgp
2.135	3.452	0.03762	Frrs1
1.685	3.41	0.03762	Fam228b
-0.6334	5.599	0.03768	Mlf2
-0.6651	7.036	0.03771	Rpl23
1.163	4.18	0.03771	Ulk4
-0.6514	6.712	0.03786	Hmgn1
0.6002	5.996	0.0379	Bicra
0.7809	5.954	0.03797	Fosl2
-0.6351	5.401	0.03797	Gpr4
-0.6254	5.083	0.03797	Rexo2
-0.7968	5.184	0.038	Cox6b1
0.7823	5.828	0.03803	Znrf2
-0.657	5.395	0.03806	Prkcsh
-1.209	4.025	0.03812	Isyna1
1.968	3.158	0.03821	Arhgap30
-0.9076	3.417	0.03828	1110059G10Rik
-0.941	3.708	0.03842	Sf3b5
0.5774	5.424	0.03842	Atp6v1c1
2.649	5.792	0.03848	Mpeg1
-0.7022	4.833	0.03848	Ormdl3
0.8494	6.066	0.03848	Rtn1
0.7558	5.639	0.03852	Morc3
2.399	2.17	0.03852	Gabrg3
-1.311	3.285	0.03852	Dpm3
-0.9055	5.972	0.03856	Cox6c
1.795	6.46	0.03856	Ncam1
2.193	5.031	0.03856	P3h2
0.8217	5.131	0.03856	Med12l
0.428	7.191	0.03868	Arid1a
-0.8953	4.839	0.03871	D8Ertd738e
-0.8373	3.543	0.03882	Gm21926
1.017	3.972	0.03882	Ccdc58
-0.6881	5.587	0.03891	Arhgef5
2.758	3.538	0.03892	Adgre1
-0.8449	4.56	0.03893	Lamtor5
-0.4355	7.075	0.03902	Mia3
-0.8544	6.032	0.03903	Cav1
-0.911	5.274	0.03915	Cox7b
2.392	3.284	0.03923	Tgfa
-0.5566	6.281	0.03923	Sypl
2.679	3.31	0.03923	Itgb2
-0.6022	7.365	0.03923	Ybx1
-0.8046	4.576	0.03923	Anapc13
1.528	4.081	0.03924	Kif1a
0.669	6.048	0.03924	Garem1
2.048	3.852	0.03926	Aim2
-0.8971	3.655	0.03927	Snrpe
0.6307	5.311	0.03927	Aagab
1.228	5.143	0.03934	Il33
-0.7458	4.447	0.03947	Serpinb1a
1.307	3.307	0.03947	Gfod2
0.623	5.978	0.03947	Eps15l1
0.7657	6.205	0.03947	Cop1
-0.6412	7.087	0.03948	Gapdh
1.616	4.773	0.03953	Sybu
-0.5814	5.84	0.03978	Cenpb
0.5509	5.124	0.03978	Hbs1l
-0.7676	6.201	0.03978	Rpl24
-0.5572	7.789	0.03978	Actg1
-0.6439	6.299	0.03978	Sidt2
-0.8166	4.267	0.03978	Cdkl2
0.6027	7.133	0.03978	Cdc14a
-0.4783	5.957	0.03982	Tmx1
0.9923	4.222	0.03982	Nfxl1
1.606	6.233	0.03996	Kitl
0.5216	8.965	0.03996	Pitpnc1
-0.6181	6.74	0.03996	Mbtps1
0.8429	4.192	0.04011	Palld
2.786	2.288	0.04012	Gm20754
0.6378	8.24	0.04012	Esyt2
-1.247	3.643	0.04012	Gm47469
-0.5633	8.541	0.04012	Plxna2
-0.8418	4.863	0.04014	Cox5b
-0.6	6.574	0.04021	Lman1
0.9204	5.187	0.04024	Cotl1
0.6006	5.87	0.04024	Cdk17
0.7164	7.694	0.04024	Farp1
-0.4487	6.855	0.04024	Uso1
-0.5055	5.976	0.04024	Igsf3
1.814	5.151	0.04024	Sorbs2
-0.6793	5.421	0.04024	Ppic
-1.092	3.381	0.04026	Znhit1
-0.4309	7.92	0.0403	Dag1
-0.7899	5.891	0.04035	Rpl28
-1.147	3.088	0.04043	Mrpl28
3.932	3.331	0.04043	Lyz2
0.5319	5.818	0.04043	Dnajc7
-0.9264	3.736	0.04043	Kctd17
0.648	7.484	0.04063	Fry
0.9031	4.777	0.04063	Dnajc6
0.5578	7.65	0.04063	Clasp2
1.09	5.449	0.0407	Man2b1
-0.9116	4.54	0.04074	Tcta
-0.5131	6.153	0.04074	Tmem165
-0.5689	5.157	0.04087	Rhpn2
-0.6814	6.33	0.04087	Rpl11
0.4975	6.067	0.04087	Desi2
-0.4643	6.343	0.04087	Tmpo
1.695	3.789	0.04095	Tmem131l
-0.7294	6.632	0.04147	Vim
0.5561	5.526	0.04147	Cdc42se2
0.7001	5.011	0.04151	Lpin1
-0.972	3.934	0.04151	1810009A15Rik
0.983	4.143	0.04157	Rgs12
2.665	3.906	0.04165	Cd180
-0.8479	5.651	0.04169	Gpx4
-0.5649	6.002	0.04172	Smim10l1
1.9	5.412	0.04175	AU020206
-1.553	3.106	0.04176	Nrk
-0.6704	5.966	0.0419	Fkbp3
-0.4226	8.848	0.04205	Add3
-0.7734	4.297	0.04205	Ier2
0.6108	6.299	0.04205	Inpp5a
1.364	5.781	0.04209	Sox5
0.6139	7.887	0.0421	Dip2c
-0.6657	6.625	0.04221	Rplp2
-0.4707	6.083	0.04228	Emc2
-0.6522	6.271	0.04228	Tmco1
-2.99	3.709	0.04228	Gm47283
-0.6527	6.396	0.04233	Bcap31
-0.6014	6.678	0.0424	Sar1a
-0.4912	6.013	0.0424	Tmem86a
2.8	5.235	0.04247	Slco2b1
-0.912	4.68	0.04279	Pdk2
-0.4187	6.895	0.04279	Cpne3
0.654	7.606	0.04279	Pard3b
2.048	5.465	0.04286	Nrcam
0.5354	6.716	0.0433	Tns1
1.245	4.997	0.04331	Elk3
2.604	4.058	0.04332	Tbc1d9
-0.6754	6.864	0.04332	Rpl14
-0.5709	5.122	0.04332	Emc10
0.6313	5.954	0.04333	Smurf1
-0.4886	7.5	0.04333	H3f3b
-0.8104	6.113	0.04336	Rps11
0.906	5.683	0.04343	Ptch1
-0.56	6.794	0.04343	Ptpn14
1.139	4.496	0.04344	Gm4876
2.254	5.869	0.04345	P2ry12
-0.7706	5.347	0.04348	Insig2
1.212	4.562	0.04353	Synpo2
-0.8769	4.771	0.04367	Srp9
-0.7584	5.119	0.04368	Edf1
-0.5338	8.369	0.04368	Gjb6
-1.231	2.802	0.04388	Chac2
-0.886	4.592	0.04397	Rpl27
2.283	3.743	0.04397	Shisa9
0.5738	9.097	0.04398	Fgfr2
-0.7592	4.942	0.04408	Hyal1
1.789	3.447	0.04409	Gm13483
-1.147	3.504	0.04411	Scand1
-0.9763	4.414	0.04412	Hint1
1.401	4.6	0.04436	Ksr1
0.9593	4.5	0.04438	Cmtm7
-0.5016	8.542	0.04438	Eef2
0.6097	7.994	0.04446	Dock1
0.9327	4.859	0.04465	Snx30
-1.043	3.2	0.04465	Coa6
0.868	4.913	0.04482	Abcc1
0.5155	5.841	0.04491	Vps8
-0.7369	5.35	0.04511	Slc30a4
0.9568	3.75	0.04518	Mb21d2
0.4812	9.148	0.04528	9530026P05Rik
-0.4619	8.117	0.04532	Bsg
1.099	4.25	0.04532	Syt11
-0.7609	4.834	0.04549	Msx1
-0.5548	5.82	0.04569	Ctbp1
-0.5876	4.765	0.04569	Sec23b
-0.4922	7.26	0.04569	Prpf8
-0.5263	7.479	0.04584	Clstn1
-0.6974	4.237	0.04611	Pycard
1.254	3.846	0.04611	Slc7a5
-0.5962	5.182	0.04626	Ephb4
0.4682	9.082	0.0463	Mbnl1
-0.4244	7.397	0.04639	Add1
-0.4778	8.597	0.0464	Timp2
1.447	5.632	0.04645	Mgat4a
0.6369	6.44	0.04645	Ints6
-0.4125	8.247	0.04651	Glg1
-0.6734	5.061	0.04651	Elob
-0.7797	5.772	0.04651	Ctnnal1
0.8169	4.123	0.04656	Macir
1.253	3.18	0.04657	Pls1
-0.516	6.323	0.04658	Tmod2
0.535	5.425	0.04676	Brwd3
1.584	3.438	0.04677	Slc37a2
0.8654	4.903	0.04677	Gm49359
-0.6555	5.618	0.04677	Fuca1
2.555	3.585	0.04717	Hepacam
1.364	3.167	0.04721	Rtp4
-0.6689	7.819	0.04725	Arhgap20
0.7756	4.905	0.04725	Exoc6
-0.5776	5.815	0.04725	Cdc42ep4
-0.4938	7.021	0.04729	Ssb
1.136	3.249	0.04731	Dennd4b
0.5008	6.145	0.04734	Rnf38
-0.5608	5.481	0.0474	Eif1ax
0.5377	6.365	0.0474	Bcl2l1
-0.8255	4.584	0.04743	Atp5k
-0.5374	6.958	0.04747	Sf3b2
0.6856	5.105	0.04752	Tbc1d12
3.083	3.743	0.04762	Stab1
-0.4712	6.439	0.04766	Foxp4
-0.6659	5.824	0.04773	Atp5h
1.172	5.653	0.04773	Nos1ap
-0.6506	4.965	0.04773	Fkbp2
-0.4975	7.611	0.04773	Pkd2
-0.6854	4.848	0.0478	Fkbp4
0.6361	6.575	0.04787	Eri3
0.791	3.525	0.04793	Trmt6
0.5003	6.301	0.0481	Cpsf6
-0.4451	6.603	0.0481	Ywhag
0.7287	4.069	0.0481	Zfat
-0.6738	5.42	0.0481	Chst15
-1.124	2.978	0.0481	Zfp414
-2.582	5.352	0.0481	Stra6
-1.123	2.916	0.0481	Gtf2h3
1.1	3.283	0.04813	Traf2
1.058	3.154	0.04813	Prag1
-0.5771	6.27	0.04814	Adgra2
-0.6461	5.636	0.04814	Rps25
0.6965	5.496	0.04817	Itprid2
-0.4146	7.5	0.04818	Sdc4
-0.6619	5.04	0.04824	Cope
0.6018	6.31	0.04826	Cbl
-0.5838	4.712	0.04828	Tmem242
-0.7563	5.234	0.04833	Sfxn2
-0.5942	5.369	0.04833	Vdac3
-0.6288	5.485	0.04843	Aldh6a1
2.205	4.821	0.04855	Cntn1
1.203	4.526	0.04857	Ttll7
1.465	6.935	0.0486	Gpm6b
-0.8191	3.818	0.04862	Tmem115
1.018	6.201	0.04869	Retreg1
-0.5446	11.22	0.04872	Fn1
-0.6712	5.266	0.04874	Pak4
0.7473	5.701	0.04876	Pacs2
-0.5532	5.054	0.04884	Gpc4
-0.7129	6.514	0.04891	Gstm5
-1.046	3.316	0.04894	Gm10076
-0.8768	7.123	0.049	Tpt1
2.45	5.172	0.049	Dlgap1
-0.9341	3.785	0.049	Mrpl51
0.9558	5.586	0.04902	Eps8
-0.4842	6.58	0.04902	Fkbp9
-0.4834	8.319	0.04905	Ptms
0.408	8.31	0.04912	Zfand3
1.629	3.081	0.04915	Mfap3l
0.5963	5.111	0.04922	Mrps9
1.827	2.699	0.04932	Grin3a
-0.51	6.123	0.04945	Snx12
0.6151	5.083	0.04945	Hps3
0.9483	4.402	0.04945	Arsg
2.322	2.232	0.0496	Nkx2-2os
0.8707	5.032	0.0499	Tmc7
-0.8306	4.001	0.0499	Zfp606
0.6922	5.124	0.05003	Afg1l
0.7555	6.59	0.05012	Rfx3
-0.4532	7.36	0.05028	Txnip
-0.7981	4.483	0.05031	C1galt1c1
0.9165	4.824	0.05033	Usp31
0.5	7.758	0.0504	Fam172a
0.6927	6.138	0.05061	Znrf1
0.6236	5.286	0.05068	Strada
-0.7131	5.518	0.05095	Chchd2
-0.4737	8.564	0.05101	Tspan13
0.882	6.791	0.05101	Abhd12
-0.3499	8.798	0.0511	Arhgef12
0.9403	7.103	0.0511	Marcks
-0.4228	6.468	0.0511	Thra
0.6227	5.144	0.0511	Cxxc5
-0.7153	5.111	0.05117	Dact1
1.869	4.02	0.05121	Atp13a4
-0.7029	5.894	0.05126	Plcb3
-1.058	4.135	0.05137	Iah1
-0.4625	7.568	0.05137	Sqstm1
-0.5792	6.871	0.0514	Ddb1
0.4608	6.668	0.0514	Osbpl8
-0.6214	6.719	0.0514	Tubb5
0.6211	5.708	0.0514	Fbxw7
0.5575	6.098	0.0514	Cyth1
0.5992	6.019	0.0514	Tet3
0.6062	6.079	0.0514	Sppl3
0.4797	7.024	0.0514	Tsc22d2
-0.7254	5.14	0.05165	Atp5j2
2.622	3.9	0.05169	Cd86
-0.4656	7.769	0.05188	Slc16a1
-0.7812	4.72	0.05188	Atic
0.6355	7.692	0.05188	Tbc1d5
0.7854	5.02	0.05189	Tbc1d4
-0.8307	3.966	0.05193	Tmem237
0.8513	5.267	0.05193	Fam117b
-0.5049	6.236	0.05193	Wbp2
1.594	3.133	0.05193	Gm10125
0.883	4.29	0.05193	Fancl
0.6127	5.705	0.05206	Akap8l
0.4555	14.24	0.05207	Malat1
-1.043	4.738	0.05222	Myorg
-0.9344	3.428	0.05222	Nsmce3
-0.7183	6.938	0.05222	Serping1
-0.8574	4.489	0.05263	H2aj
-0.6363	4.569	0.05263	Cep170b
3.204	4.043	0.05265	Rnf180
-1.054	5.916	0.05277	Dynll1
-0.4195	9.636	0.05294	Slc47a1
-0.5293	8.101	0.05301	Anxa3
2.546	6.192	0.05305	Nav3
0.8524	6.678	0.05305	Rptor
-0.5771	5.863	0.05308	Zmat2
1.868	5.384	0.05312	Daam2
-0.6883	5.739	0.05333	Rer1
-0.7639	6.152	0.05337	Rps7
0.4882	6.268	0.05337	Clec16a
-0.7215	5.071	0.05337	Park7
-1.07	3.069	0.05339	Urod
2.285	3.508	0.0534	Zfp366
-0.6962	5.432	0.0534	Rpl36a
-0.4568	9.466	0.05345	Eif4g2
-0.5231	6.532	0.05345	Polr2m
-0.4539	5.914	0.05345	Sh3bp5
-0.619	5.474	0.05345	Tmed9
0.662	4.729	0.05357	Nln
0.5215	5.886	0.05357	5031425E22Rik
-0.6295	5.368	0.05357	Cetn3
-1.018	4.614	0.05357	Uqcr10
2.853	3.077	0.05357	Cd68
-0.7305	4.605	0.0536	Slc25a11
-0.5832	5.45	0.0536	Aldh3a2
-0.4628	7.004	0.0536	Mdfic
-0.6077	6.817	0.05361	Psip1
-0.8326	3.642	0.05367	Prorsd1
-0.4553	7.484	0.05368	Smim14
0.6352	6.373	0.05368	Zfp532
-0.8564	4.87	0.05368	Six2
0.8232	4.991	0.05369	Gpam
2.328	4.834	0.05369	Pnpla7
0.891	3.924	0.05386	Arid5a
-0.5778	4.794	0.05399	Eif3m
-0.568	5.337	0.05399	Mgat2
-0.8098	4.649	0.05399	Tmed3
0.7955	4.746	0.05406	Gm45837
0.8035	6.439	0.05413	Ece1
0.3756	7.619	0.05418	Rbm25
0.4014	6.594	0.05424	Tmem131
1.219	5.697	0.05434	Golm1
0.6633	6.067	0.0544	2610035D17Rik
-0.5145	5.57	0.0544	Cct4
-0.3851	9.405	0.05445	Gnas
-0.8597	3.312	0.05454	1700126G02Rik
0.846	4.343	0.05454	Gm33906
-0.6223	5.821	0.05462	Cdc37
1.626	2.877	0.05462	Slc1a1
-0.5558	5.168	0.05462	Tmem263
2.91	3.97	0.05477	Kcnn2
0.8882	4.687	0.05477	Pla2g15
0.534	7.062	0.05491	Dnmt3a
-0.8797	3.555	0.05491	Mpv17l2
0.7478	4.224	0.05491	Idua
-0.7262	4.408	0.05491	Rab4a
0.6604	6.143	0.05491	Lncppara
-0.668	5.342	0.05507	Furin
3.768	5.639	0.05507	Kcnd2
-0.5162	6.662	0.05511	Cd63
0.7176	4.579	0.05511	Ppp4r1l-ps - ENSMUSG00000121504
2.114	4.16	0.05527	Grid1
-0.5741	5.319	0.05527	Plxnb1
0.6544	5.662	0.05527	Ccnl2
-0.4598	8.632	0.05527	Itgb1
1.149	6.086	0.05531	Tbc1d8
0.42	8.816	0.05545	Fmnl2
-0.5336	5.958	0.05545	Jup
0.5592	6.281	0.05559	Armh3
2.319	7.104	0.05576	Ctss
-0.6307	4.698	0.0558	Mmgt2
-0.6938	5.471	0.0558	Slc16a11
1.747	3.541	0.05594	Hk2
0.4724	6.88	0.05594	Pias2
-0.4096	8.695	0.05594	Neo1
-0.5968	7.829	0.05607	Hsp90aa1
0.6076	5.447	0.0562	Zfp277
-0.6116	5.816	0.05626	Ergic3
-0.472	5.484	0.05643	Rest
1.599	2.772	0.05643	Lfng
0.6435	4.722	0.05643	Mark4
1.159	3.494	0.0565	Mapkapk3
-0.4412	9.136	0.0565	Aplp2
1.264	3.074	0.05652	Tbc1d31
0.9072	3.127	0.05652	Ccdc80
-1.074	4.484	0.05658	Gm8189
1.04	3.247	0.05667	Rcc1
-0.6051	5.597	0.05679	Htatsf1
-0.9484	3.949	0.0569	Mrps21
-0.5142	5.804	0.0569	Psmd2
-0.6095	5.086	0.05695	Gabarapl2
-0.7305	4.454	0.05695	Tmem184c
0.6693	6.685	0.05706	Zfp407
-0.4134	7.888	0.05707	Hdlbp
-0.9209	3.923	0.05711	Mrps14
0.6119	4.871	0.05711	Ube2d1
-0.5571	7.192	0.0573	Itgb8
-0.9663	3.678	0.05738	Mrpl41
0.5	5.829	0.05738	Scaf4
-0.6386	6.001	0.05738	Scp2
0.7452	6.196	0.05738	Lcorl
0.5791	7.104	0.05743	Man2a1
-0.5231	5.412	0.05744	Arpc1a
0.6539	5.216	0.05747	Stx6
-0.3696	8.034	0.0575	Bgn
0.8128	5.071	0.05753	Mknk1
-0.5855	5.159	0.05753	Ufm1
-0.6435	4.954	0.05754	Pttg1
-0.5139	6.894	0.05754	Eif3c
-0.6667	4.533	0.05757	Tmed2
0.7964	4.309	0.05757	Secisbp2
0.5478	6.042	0.05758	Acvr1
0.5407	8.217	0.05766	Prkcb
0.8212	7.417	0.05766	Sgms1
0.6835	4.898	0.05772	Gm20732
0.3929	6.708	0.05776	Map3k2
1.43	3.168	0.05778	Mtcl1
-0.7594	4.335	0.05792	Arl14ep
-0.8534	5.661	0.05794	Ptgdr
-0.711	5.147	0.05796	Smpd1
0.8967	4.724	0.05796	Gtf2h2
0.6387	6.342	0.05799	Peak1
0.8057	4.719	0.05808	Dagla
0.5137	6.817	0.05808	Uvrag
-0.7188	4.729	0.05812	Grcc10
-0.7913	4.167	0.05819	Pus7
1.627	3.005	0.05822	Tdg
-0.9453	4.536	0.05827	Kbtbd11
-0.5477	4.914	0.05835	H2az2
-0.9343	4.28	0.05835	Rrm1
-0.4242	6.605	0.05846	Ube2r2
0.541	6.109	0.05873	Ino80
1.562	4.895	0.05883	Mapk10
-0.4666	5.763	0.05889	Ccdc91
-0.7243	4.467	0.05889	Cyc1
-0.7966	4.208	0.05891	Tmem126b
1.2	2.769	0.05907	Lsp1
-1.141	3.763	0.05907	Cdk2ap2
-0.8214	3.797	0.05915	Tmem147
-0.7004	6.526	0.05915	Fau
-0.9689	3.137	0.05937	2200002D01Rik
-0.5522	5.657	0.05941	Ehd1
-0.4382	6.812	0.05954	Lpgat1
-0.8316	5.152	0.05981	Emp3
0.5749	5.928	0.05989	Fkbp15
-0.7495	4.649	0.05989	Phax
-0.7624	4.627	0.05997	Nptxr
-0.5271	5.506	0.05997	Hadhb
0.601	5.575	0.05997	Mapk8ip3
-0.6543	5.494	0.05997	Tceal8
-0.6213	4.153	0.06019	Hibch
0.7439	3.738	0.06033	Pgap1
-0.4922	6.692	0.06048	Ap2a2
1.408	4.078	0.06048	Fam171b
0.606	6.719	0.06049	Rsrc1
0.6784	4.889	0.06049	Auh
-0.6715	6.618	0.06049	Rps9
0.5026	6.412	0.06049	Rev1
0.9798	3.254	0.06054	Mon1a
-0.7165	3.876	0.06054	Rex1bd
2.845	5.239	0.0606	Apbb1ip
-0.828	4.337	0.06067	Snrpa
0.5877	5.9	0.06067	Pwwp2a
1.449	3.706	0.06067	Arhgef3
-0.8685	3.76	0.06067	4632415L05Rik
0.9005	4.368	0.06067	Zfp933
-0.7182	5.002	0.06067	Gnptg
0.5518	6.621	0.06067	Atxn7
-0.4268	7.333	0.06067	Zfp106
1.923	3.059	0.06067	St8sia4
0.7471	5.313	0.06067	Atp7a
-0.6177	4.21	0.06099	Pak1ip1
0.6358	4.62	0.06099	Klhl18
-0.5166	6.498	0.06101	Abca3
1.816	6.855	0.06101	Pde4b
-0.4592	7.858	0.06101	Cavin1
-0.8519	4.697	0.06101	Eif4a3
-0.6644	5.644	0.06101	Ppp1ca
-0.4768	5.878	0.06105	Eif2s2
-0.9884	4.016	0.06118	Nfatc4
0.9085	3.646	0.0612	Cd274
1.918	3.14	0.0612	Samsn1
-0.6702	5.739	0.0612	Poglut3
0.5869	5.919	0.0612	Nnt - ENSMUSG00000025453
-0.5418	5.733	0.0612	Cat
0.5417	5.658	0.06121	AU040320
-0.9013	3.054	0.06126	Ss18l2
-0.5312	6.418	0.06144	Tpi1
0.6444	7.721	0.06144	Ube4b
1.252	4.395	0.06158	Fam13c
0.5534	5.747	0.06168	Ric8b
-0.4575	5.875	0.06172	Lman2
-0.4402	7.916	0.06172	Slc12a7
-0.7786	4.72	0.06172	Ceacam1
-0.5515	5.646	0.06172	Ccdc127
-0.7265	8.636	0.06172	Fxyd5
-0.7055	5.723	0.06177	Ddost
0.8211	3.753	0.06177	Eaf2
0.7858	4.069	0.06188	Rrnad1
2.071	3.29	0.06199	Grb14
-1.122	2.83	0.06199	Suox
-0.4002	6.326	0.06199	Atp6ap1
0.5089	7.854	0.06199	Dennd1a
-0.6074	5.037	0.06199	Acaa2
-0.5672	8.183	0.06199	Zbtb7c
0.8255	3.74	0.06199	Gnpda1
-1.226	3.256	0.06199	Rnd2
0.7942	6.854	0.06199	H2-D1
-1.295	3.732	0.06199	Tfap2b
0.478	7.309	0.06219	Gab1
0.7267	6.657	0.06219	Usp54
-0.3727	7.206	0.06219	Prkar1a
-0.5671	5.864	0.06219	Slc4a2
0.5413	5.398	0.06219	Vps50
2.256	2.176	0.06219	Gm26802
0.5751	5.45	0.06219	Ccdc82
0.7823	3.524	0.06219	Snph
-0.4805	5.592	0.06219	Mettl7a1
0.6281	6.724	0.06219	Zhx3
1.38	3.783	0.06219	Slc16a10
0.5564	7.168	0.06219	Med13l
1.11	4.159	0.06219	Tspan18
2.07	5.1	0.06219	Fmn2
-1.115	4.845	0.06227	Nt5dc2
-1.111	3.6	0.06227	Mfsd5
-0.4611	6.52	0.06255	Snrnp200
2.462	4.601	0.06262	Gabbr2
-1.031	3.239	0.06265	Svbp
0.6206	4.878	0.06265	Lgals9
-0.6759	4.496	0.06265	Pqlc3
0.4904	8.607	0.06274	Fbxl17
-0.7403	6.516	0.06281	Map1a
-0.4752	5.441	0.06283	Ipo5
-0.8038	3.465	0.06287	Uqcc3
-0.5355	7.081	0.06291	Smo
-0.3933	7.245	0.06291	Pitpna
0.4703	5.81	0.06291	Ap1b1
0.6461	4.744	0.06302	Dexi
-0.4731	6.39	0.06302	Tfpi
-0.6049	4.723	0.06316	Hid1
2.241	1.929	0.06319	Liph
2.189	3.279	0.06325	Cygb
1.049	4.386	0.0635	Wdr17
-0.5984	5.822	0.0635	Rab1b
-0.79	4.251	0.0635	Spr
-0.4927	6.026	0.06354	Mrfap1
-0.4269	7.434	0.06364	Pkd1
0.4824	5.573	0.06395	Nmt2
0.4587	6.12	0.06395	Stx7
-0.5294	7.333	0.06395	Pkm
-0.764	3.854	0.06395	Oxa1l
-0.5718	4.6	0.06395	Psmd6
1.844	5.498	0.06398	Ctnna2
0.9333	3.338	0.06401	Fam234b
1.226	4.72	0.06407	Mpp7
0.5525	7.159	0.0641	Pnisr
-0.471	6.506	0.06422	Rcn2
1.836	2.917	0.06446	Erg
-0.4938	5.013	0.06446	Cln5
0.8508	4.062	0.06492	Mettl25
0.5387	6.094	0.06492	Xrcc4
0.5123	6.693	0.06496	Atad2b
0.4889	5.745	0.06504	Gm20696
-0.5541	5.048	0.06505	Gne
0.3927	6.06	0.06511	Psen1
2.83	2.889	0.06511	Nfam1
0.4287	7.103	0.06513	Arid5b
0.4397	7.241	0.06513	Ppp6r3
1.974	3.196	0.06513	Slc7a10
0.792	3.754	0.06513	Exosc7
-0.4002	6.765	0.06513	Arf1
0.7018	8.369	0.06513	Slit3
-0.7173	4.934	0.06513	Gsta4
1.036	6.353	0.06516	Dclk1
-0.701	5.178	0.0652	Cstf2
-0.8812	4.341	0.0652	Nsmce4a
-0.4395	7.013	0.0652	Mlec
0.5538	5.839	0.06525	Mideas
-0.7575	3.755	0.06535	Gstt3
0.3829	9.857	0.0654	Macf1
-0.4957	6.936	0.06555	Mapk3
0.4376	6.176	0.0656	Vezt
-0.8583	3.409	0.0656	Dmtn
-0.747	3.65	0.0657	Nudt12
0.5886	5.268	0.06571	Daglb
1.894	2.412	0.06572	Gm31520
-0.5869	5.612	0.06581	Baiap2l1
-0.7122	5.388	0.06581	A4galt
-0.7992	4.56	0.06591	Hspe1
2.397	3.716	0.06592	Gm16168
0.5553	6.092	0.066	Rngtt
0.6288	7.921	0.06605	Abca1
-0.5097	5.332	0.06605	Yipf4
1.352	3.769	0.06605	Vrk1
-1.021	4.097	0.06605	Susd2
-0.5612	4.59	0.06614	Sigmar1
1.839	5.062	0.06614	Nckap5
0.8217	4.558	0.06614	Cdin1
-0.5572	5.029	0.06614	Btf3
-0.6649	6.424	0.06619	Rpsa
0.6762	5.991	0.06619	Zc3h12b
0.41	7.378	0.06626	Ncor2
0.9159	3.343	0.06626	Coq8b
-0.5077	5.48	0.06629	Trappc3
0.5134	5.614	0.0663	Slc30a7
-0.5951	6.173	0.0663	Pgd
1.913	2.526	0.0663	Lpxn
-1.45	4.677	0.0663	Dapl1
-0.9287	3.724	0.06636	Rpl36al
-0.3687	7.377	0.06648	Eif3a
-0.6336	5.045	0.06648	Sox4
-0.4534	7.061	0.06652	D630045J12Rik
0.7597	5.983	0.06697	Sdccag8
-0.7107	4.835	0.06703	Carhsp1
-0.5033	8.074	0.06703	Fgfr1
-0.4307	6.742	0.06703	Nbr1
-1.036	3.269	0.06718	Slc35g2
-0.8841	3.037	0.0672	Car11
1.21	3.923	0.06723	Elf4
0.799	3.891	0.06737	Flcn
0.4372	5.396	0.06743	Vamp4
-0.9831	5.672	0.06743	Hspb1
2.828	3.244	0.06743	Ncf1
0.6272	4.934	0.06744	Gpatch2l
0.6515	4.4	0.06756	Rnf121
0.4536	7.487	0.06782	Sfpq
-0.4576	6.582	0.06809	Slc25a3
0.5904	5.196	0.06809	Gfm2
-0.4805	6.814	0.06809	Cnn3
1.848	3.241	0.06809	Cyp2j9
0.5396	6.063	0.0681	Abcc5
-0.6701	4.347	0.06812	Fbxo25
-0.4345	7.34	0.06812	Iqgap1
-0.4602	6.235	0.06813	Tfdp2
0.8972	3.131	0.06822	Anks6
-0.7786	4.243	0.06831	Mavs
0.3943	6.404	0.06832	Usp32
-0.4954	6.681	0.06833	Epdr1
-0.4966	6.206	0.06835	Enpp5
-1.014	2.954	0.06841	Wfikkn2
-0.6165	5.203	0.06845	Actr10
1.947	5.721	0.0686	Il1rapl1
-0.7808	5.22	0.06864	Hmgn3
-0.4682	7.658	0.06865	Chpt1
-1.293	4.481	0.06865	Mansc4
0.3877	6.855	0.06865	Pds5a
-0.8316	5.864	0.06878	Ggh
-0.4385	8.867	0.06878	Jarid2
-0.4299	5.811	0.06904	Alg10b
-0.5339	7.245	0.06907	Zic4
-0.8658	3.353	0.06922	Snrpd2
0.5354	6.157	0.06922	Btrc
0.8743	3.459	0.06926	Smg9
0.7433	4.739	0.0693	Slc39a14
-0.6719	4.704	0.06931	Cbr1
-0.81	3.864	0.06931	Snx21
-0.6418	4.805	0.06932	Slc6a8
-0.5041	6.365	0.06932	9530068E07Rik
2.212	2.137	0.06947	Mir142hg
2.737	2.653	0.06947	Hrh1
1.139	3.23	0.06947	Atp6v0e2
0.7703	4.215	0.0695	Cep43
0.9837	4.281	0.06955	Tnfaip8
0.8962	4.728	0.06964	Mfge8
-0.5613	5.047	0.0697	Strap
0.5678	5.633	0.0697	Acpp
1.068	6.999	0.0697	Frmd4b
-0.6878	3.856	0.0697	Decr2
-0.749	5.747	0.0697	Hes1
0.8104	6.985	0.0697	Gnao1
-0.4984	5.356	0.0697	Ppp2r3c
0.7056	4.146	0.0697	Tatdn1
0.8969	3.557	0.0697	Kcnt1
-0.3903	6.858	0.0698	Stt3b
0.5665	5.525	0.06986	Wdr20
2.437	4.447	0.06996	Myo1f
1.664	5.264	0.06998	Mctp1
0.778	4.402	0.07001	Mtx3
-0.5361	5.409	0.07001	Nacc1
-0.849	3.566	0.07001	Atp5g1
-0.6728	4.653	0.07003	Mmp28
0.6492	7.981	0.07003	Dennd4a
1.9	2.671	0.07004	Sema7a
-0.4725	5.333	0.07008	Sspn
-0.6866	5.911	0.07028	Epha7
-0.7057	3.993	0.07036	Hcfc1r1
0.6307	4.42	0.07047	Actr8
-0.458	6.145	0.07058	Myl12b
0.6492	5.999	0.0707	Ubac2
-0.649	4.578	0.0707	Psmc4
0.6131	5.191	0.07078	Ttyh3
-0.6619	5.263	0.07079	Nqo1
-0.5359	5.974	0.0708	Cggbp1
-0.5486	5.85	0.0708	Zfp618
0.5052	5.495	0.0708	Eya3
0.5653	4.927	0.0708	Mad1l1
3.16	5.337	0.07086	Asic2
-0.7987	3.577	0.07096	Thoc3
-0.4116	7.967	0.07097	Nfe2l1
0.6208	5.381	0.071	Snx10
1.11	2.901	0.07102	9430015G10Rik
-0.6675	4.48	0.07102	Cox17
0.5757	9.247	0.07104	Phactr1
-0.6895	5.797	0.07104	Selenos
-0.3642	7.484	0.07104	Zcchc24
-1.005	3.203	0.07134	Jagn1
-0.5379	4.894	0.07144	Atp5g3
-0.4445	7.023	0.07154	Hnrnpa3
0.4961	6.699	0.07162	Irf2
-0.3992	6.052	0.07162	H13
-0.645	4.484	0.07162	Rnf7
0.6117	4.589	0.07162	Grk4
0.4277	7.155	0.07162	Cdk13
1.719	3.031	0.07162	Atp8b1
-0.423	6.847	0.07163	Gpi1
0.6623	4.409	0.07186	Pip4p1
1.04	4.235	0.07191	Etv1
-0.3764	7.843	0.07194	Oxct1
-0.4181	6.437	0.07194	Erp44
0.422	6.98	0.07194	Sgk3
-0.7353	3.893	0.07215	Lrrc57
0.409	6.838	0.07215	Faf1
-0.4243	6.537	0.07215	Ywhah
0.946	6.698	0.07216	Ddhd1
0.9493	5.016	0.07218	Trim2
-0.5927	4.444	0.07218	Gpd1l
0.43	7.77	0.07219	Chst11
-1.656	3.221	0.07222	Rasd1
0.6072	4.42	0.07222	Hpf1
-0.5117	4.719	0.07236	Uck2
0.5747	7.104	0.07237	Cyfip1
-0.6582	6.734	0.07237	Pcbp1
0.5219	7.571	0.0724	Ski
-0.7697	3.613	0.0724	Yif1b
-0.4744	7.303	0.07248	P4hb
-0.413	6.936	0.07256	Paip2
-0.6912	4.155	0.07257	Slc35e1
0.4136	6.194	0.0726	Rnf111
-0.599	5.399	0.07278	Rpl34
2.621	5.619	0.07301	St6galnac3
0.9118	4.104	0.07301	Ddo
-0.4558	7.686	0.07301	Eif4g1
0.4307	7.136	0.07302	Fam193a
0.6919	5.482	0.07308	1110019D14Rik
0.7546	6.596	0.07308	Cep85l
-0.8088	3.817	0.07313	Mageh1
0.5335	8.731	0.07313	Wwox
-0.5653	6.556	0.07313	Hspd1
-0.5236	7.106	0.07313	Prdx1
-0.4156	5.99	0.07316	Ipo8
0.4355	6.863	0.07332	Ambra1
-0.7081	4.007	0.07333	Pigh
0.6132	4.746	0.07334	Mphosph9
-0.6084	4.525	0.07381	Rmdn3
-0.8252	4.812	0.07381	Atp5md
0.6728	4.309	0.07381	Styx
1.01	3.501	0.07392	Tmem266
-0.4096	6.114	0.07399	Fzd3
0.4351	7.84	0.07405	Bcas3
-0.8204	3.668	0.07409	Ces2g
-0.5837	5.38	0.07409	Bmp1
0.7723	4.247	0.07421	Cep135
-0.7691	3.411	0.07425	Spsb2
1.128	4.026	0.0743	Lonrf3
-0.5572	5.844	0.07431	Scd1
-0.6044	4.457	0.07431	Srp19
-0.5014	6.701	0.07436	Smarca5
-0.6701	5.885	0.07436	Emc7
0.5762	4.751	0.07436	Hmgxb3
-0.5144	5.95	0.07436	Bnip2
-0.5275	7.575	0.07436	Ywhab
0.5136	5.728	0.07437	Crtc3
0.6829	4.878	0.07438	Cdyl2
-0.9613	3.307	0.07447	Dtd2
-0.4974	5.421	0.07448	Gna11
0.4238	6.485	0.07448	Herc4
1.458	3.73	0.07448	Phkg1
-0.5986	5.151	0.07448	Taldo1
2.292	2.695	0.07457	9430041J12Rik
-0.6336	4.545	0.07471	Slc18b1
-0.8848	3.708	0.07471	Tmem258
-0.8143	3.706	0.07471	Dbn1
-0.761	3.955	0.07471	Gm20721
-0.3682	8.461	0.07493	Wls
[truncated: 55,011 more rows]

## Sheet: DE-7_Microglia
logFC	AveExpr	p_val_adj	gene_names
-4.883	4.032	0.02296	Gm47283
-3.296	5.757	1.195e-05	Nme7
-3.114	4.898	0.009364	Qsox1
-2.655	3.413	0.01003	Rab37
-2.283	9.812	2.929e-08	Arsb
-2.172	3.646	0.01268	Glrx
-1.917	7.343	0.02228	Fos
-1.898	4.264	0.01629	Rasgrp4
-1.879	5.407	0.009213	Alox5
-1.868	5.047	0.004776	Gm10138
-1.81	5.007	0.001836	Sfmbt2
-1.744	3.37	0.02296	Spock1
-1.72	5.387	0.003055	Cmtm8
-1.695	3.874	0.02721	Cry1
-1.643	6.273	0.04629	Klf2
-1.628	5.269	0.003985	Tagln2
-1.583	6.626	0.009258	Rgs1
-1.541	5.364	0.009258	Socs3
-1.513	6.223	0.00181	Ubc
-1.476	4.528	0.02946	H1f4
-1.317	6.142	0.00181	Gm49342
-1.315	7.027	0.03941	Dusp6
-1.301	4.58	0.0286	Gimap6
-1.249	5.179	0.02286	Zfp729a
-1.226	7.445	0.01481	Srgn
-1.221	7.796	0.000355	Xpr1
-1.192	6.067	0.01003	Tom1l1
-1.169	5.35	0.01304	Lbh
-1.165	5.738	0.005735	Gpx1
-1.156	7.485	0.01175	Arhgap15
-1.149	5.928	0.01282	Cbx4
-1.127	5.55	0.04954	Jup
-1.068	6.764	0.01608	Ppp1r10
-1.051	7.15	0.01921	Klf6
-1.045	5.269	0.02426	Epha2
-1.042	6.412	0.01268	Arrdc3
-1.04	6.136	0.04649	Ier5
-1.04	5.016	0.04663	Bzw2
-1.038	4.776	0.03931	Trim47
-1.033	6.488	0.01385	Fam107b
-1.033	8.247	0.0168	Rgs2
-1.032	7.672	0.01921	Sgk1
-1.029	5.684	0.02306	Tal1
-1.018	7.516	0.02721	Btg2
-1.012	7.119	0.009125	Hsp90aa1
-1.007	12.89	0.01739	Lars2
-0.9985	6.77	0.01143	Actg1
-0.9657	6.548	0.02103	Stk17b
-0.9428	4.762	0.04629	Rab32
-0.9426	6.533	0.04897	Etv5
-0.9329	5.156	0.04006	Lfng
-0.9168	7.905	0.009125	Tnfrsf21
-0.916	6.125	0.02482	Kdm6b
-0.9083	6.11	0.02687	Gng10
-0.9044	5.347	0.0468	Slc39a10
-0.8987	5.984	0.01304	Tmem64
-0.8812	7.786	0.01268	Gpr183
-0.88	6.191	0.04904	Nudt4
-0.863	8.768	0.00181	Ccr5
-0.862	8.354	0.00802	Hspa8
-0.8537	5.655	0.02817	Fhad1
-0.8495	5.985	0.02113	Limd2
-0.8424	6.571	0.01921	Rad51b
-0.8223	6.016	0.04102	Cln8
-0.8203	6.935	0.03884	Btg1
-0.8174	6.011	0.03295	Slc25a5
-0.8083	11.54	0.01143	Cst3
-0.7907	5.361	0.04629	Nudc
-0.7838	8.871	0.01003	Rnase4
-0.7814	8.136	0.02282	Txnip
-0.779	7.605	0.02946	Samsn1
-0.7781	5.729	0.04946	Hhex
-0.775	5.583	0.04904	Myadm
-0.7676	6.555	0.03295	Sall3
-0.7655	8.425	0.02296	Ssbp2
-0.76	6.267	0.03253	Tgm2
-0.7568	5.862	0.03838	Dstn
-0.7484	7.195	0.01481	Ndfip1
-0.7447	7.011	0.01254	Ogfrl1
-0.7337	6.774	0.02829	Coro1a
-0.7247	5.818	0.04727	Cdc14a
-0.7211	5.931	0.03941	Tmem86a
-0.7128	7.93	0.01128	Calm2
-0.7076	6.587	0.04623	Vps37b
-0.6971	8.477	0.00588	Ctsc
-0.6949	6.774	0.02306	Tspan13
-0.6731	8.516	0.02296	Gnas
-0.6675	6.685	0.04688	Hnrnpab
-0.6657	7.316	0.01481	Polr2a
-0.6641	6.897	0.03838	Atp6ap2
-0.6629	6.331	0.03742	Hnrnpdl
-0.651	9.815	0.01629	Tmsb4x
-0.6499	7.679	0.04335	Sat1
-0.6461	8.875	0.03361	P2ry13
-0.6447	7.438	0.03253	Fcgr2b
-0.6437	7.107	0.02823	Tlr13
-0.6378	8.614	0.01422	Man1a
-0.6358	7.409	0.03026	Ptms
-0.6354	7.587	0.02103	Hnrnpc
-0.628	7.102	0.04461	Atp1a1
-0.6169	7.548	0.03361	Mapre2
-0.6165	7.046	0.0296	Rab43
-0.6134	6.973	0.04161	Azin1
-0.6068	7.025	0.04342	Kras
-0.6038	7.153	0.02061	Arl6ip1
-0.6027	11.22	0.01385	Actb
-0.601	16.82	0.02479	Rn18s-rs5
-0.5884	7.488	0.02711	Tspan7
-0.581	6.606	0.0485	Commd8
-0.5793	8.049	0.04342	Rhoh
-0.5761	6.678	0.03941	Srsf11
-0.5666	7.078	0.03838	Pfn1
-0.5632	8.232	0.03279	Bin2
-0.5461	7.002	0.04102	Tifab
-0.5375	8.569	0.01416	Cd53
-0.5364	7.443	0.04629	Eif4a1
-0.5355	7.885	0.03011	Atg10
-0.5312	9.238	0.02961	Basp1
-0.5163	7.066	0.04904	Prkar1a
-0.5127	9.919	0.03783	Marcks
-0.5112	7.467	0.03656	Itm2c
-0.4911	9.619	0.01143	Ddx5
-0.485	10.66	0.01422	Lgmn
-0.4786	7.739	0.04609	Hnrnpk
-0.4744	10.21	0.03931	Selenop
-0.4572	7.915	0.04904	Rhoa
-0.4546	8.517	0.03789	Efhd2
-0.4044	8.434	0.0468	Rap1b
0.4521	7.99	0.04328	Rai1
0.4608	8.025	0.04629	Cmklr1
0.4725	6.989	0.04629	Luc7l3
0.4788	7.039	0.03884	Syngr1
0.5061	7.659	0.02479	Galnt10
0.511	6.995	0.04461	Ralgapa1
0.5115	7.047	0.03941	Bltp1
0.5205	6.831	0.03656	Nfix
0.5261	6.96	0.04903	Gm21992
0.5304	7.565	0.04663	Lyst
0.5333	6.858	0.04904	Pacs2
0.5406	7.586	0.01481	Eri3
0.5435	7.326	0.03484	Lrch3
0.5502	7.964	0.03838	Atp2c1
0.5522	6.704	0.02918	Nr6a1
0.5613	8.76	0.03484	Man1c1
0.5666	6.263	0.0468	Naip6
0.5752	6.976	0.03789	Ankrd12
0.5759	6.993	0.04663	Tbck
0.583	7.353	0.04629	Kansl1l
0.5833	8.077	0.009213	Phyhd1
0.5882	5.943	0.04903	Rab40c
0.5892	7.564	0.03941	Stab1
0.5893	7.303	0.01459	Kdm2a
0.5897	6.91	0.03838	Vps13c
0.5997	7.879	0.03654	Gsap
0.6144	6.33	0.0296	Banp
0.62	7.061	0.03838	Frrs1
0.6239	11.06	0.0485	mt-Rnr1
0.6259	6.937	0.03904	Kif13a
0.6286	5.95	0.03484	Parp9
0.6312	9.291	0.02842	P3h2
0.6349	6.792	0.02156	Appl2
0.6351	9.953	0.01143	Prkn
0.6437	6.399	0.02685	Il15
0.6488	7	0.04904	Pcdhgb2
0.6532	6.717	0.04461	Trim30d
0.6534	7.121	0.009125	Umad1
0.6553	5.329	0.0468	Cog3
0.6729	5.76	0.03514	Snapc3
0.6861	8.88	0.009125	Sipa1l2
0.6906	6.73	0.0468	Mbtd1
0.6941	5.696	0.03904	Stard8
0.7263	7.776	0.004776	Sdk1
0.7279	6.76	0.01003	Rilpl1
0.732	6.574	0.02083	Slc39a11
0.7334	6.083	0.03838	Rab11fip5
[truncated: 56,835 more rows]

## Sheet: DE-8_Oligodendrocyte
logFC	AveExpr	p_val_adj	gene_names
[truncated: 57,010 more rows]

[truncated: 18 more sheets: DE-9_Oligodendrocyte, DE-10_Pericyte, DE-11_Astrocyte, DE-12_Endothelia, DE-13_Ependymal_cell, DE-14_Ependymal_cell, DE-15_Choroid_plexus, DE-16_Immune, DE-17_Endo_Pericyte, DE-18_Endothelia, DE-19_Endothelia, DE-20_Oligodendrocytes, DE-21_OPCs, DE-22_Choroid_plexus, DE-23_Unknown, DE-24_Microglia, DE-25_Astrocyte, DE-26_Immature_neuron]
